# Supplementary material for: A Trypanosoma cruzi Zinc Finger protein that controls expression of epimastigote specific genes and affects metacyclogenesis
Source: bioRxiv or medRxiv preprint supplement (doi:10.1101/2020.07.07.189688), 2020-07-07
Supplement: Supplementary file [file media-1.pdf]

# Supp. Fig.1

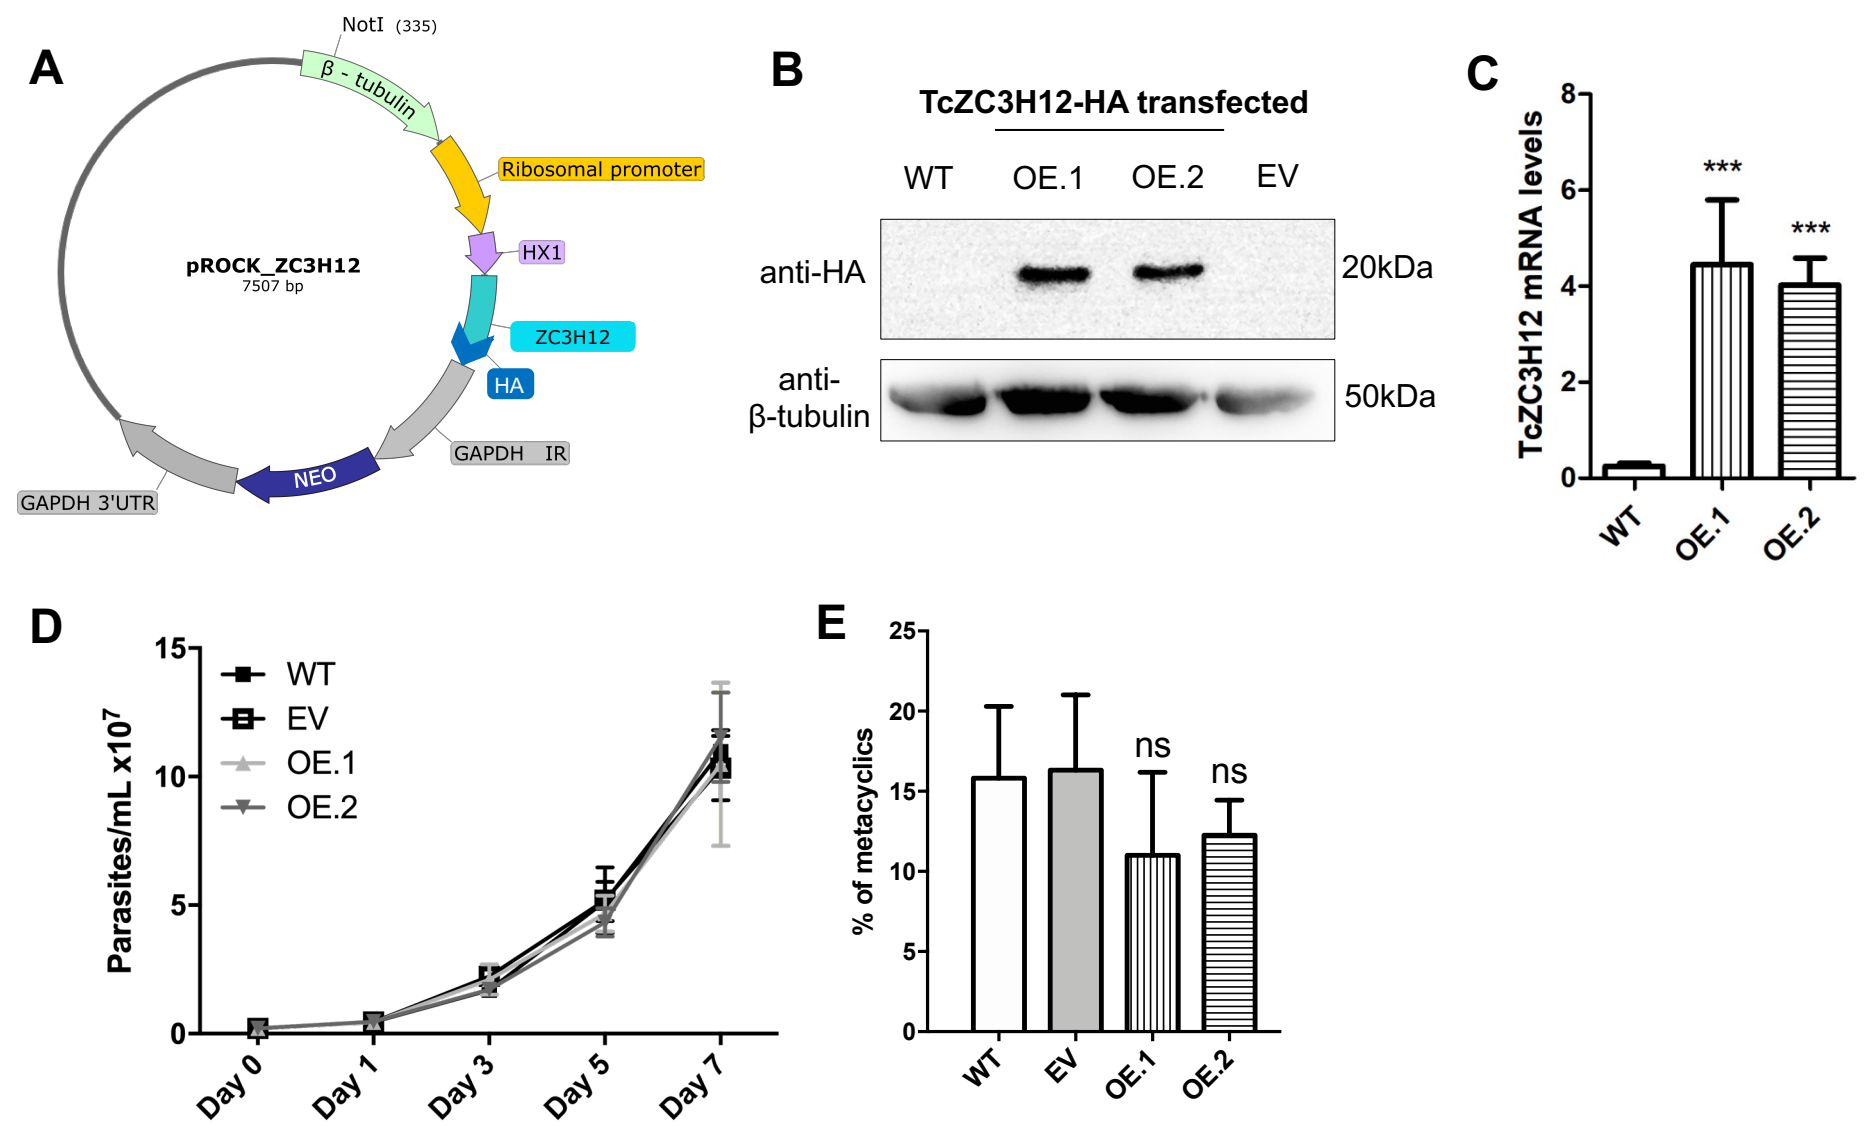

Supp. Fig.2

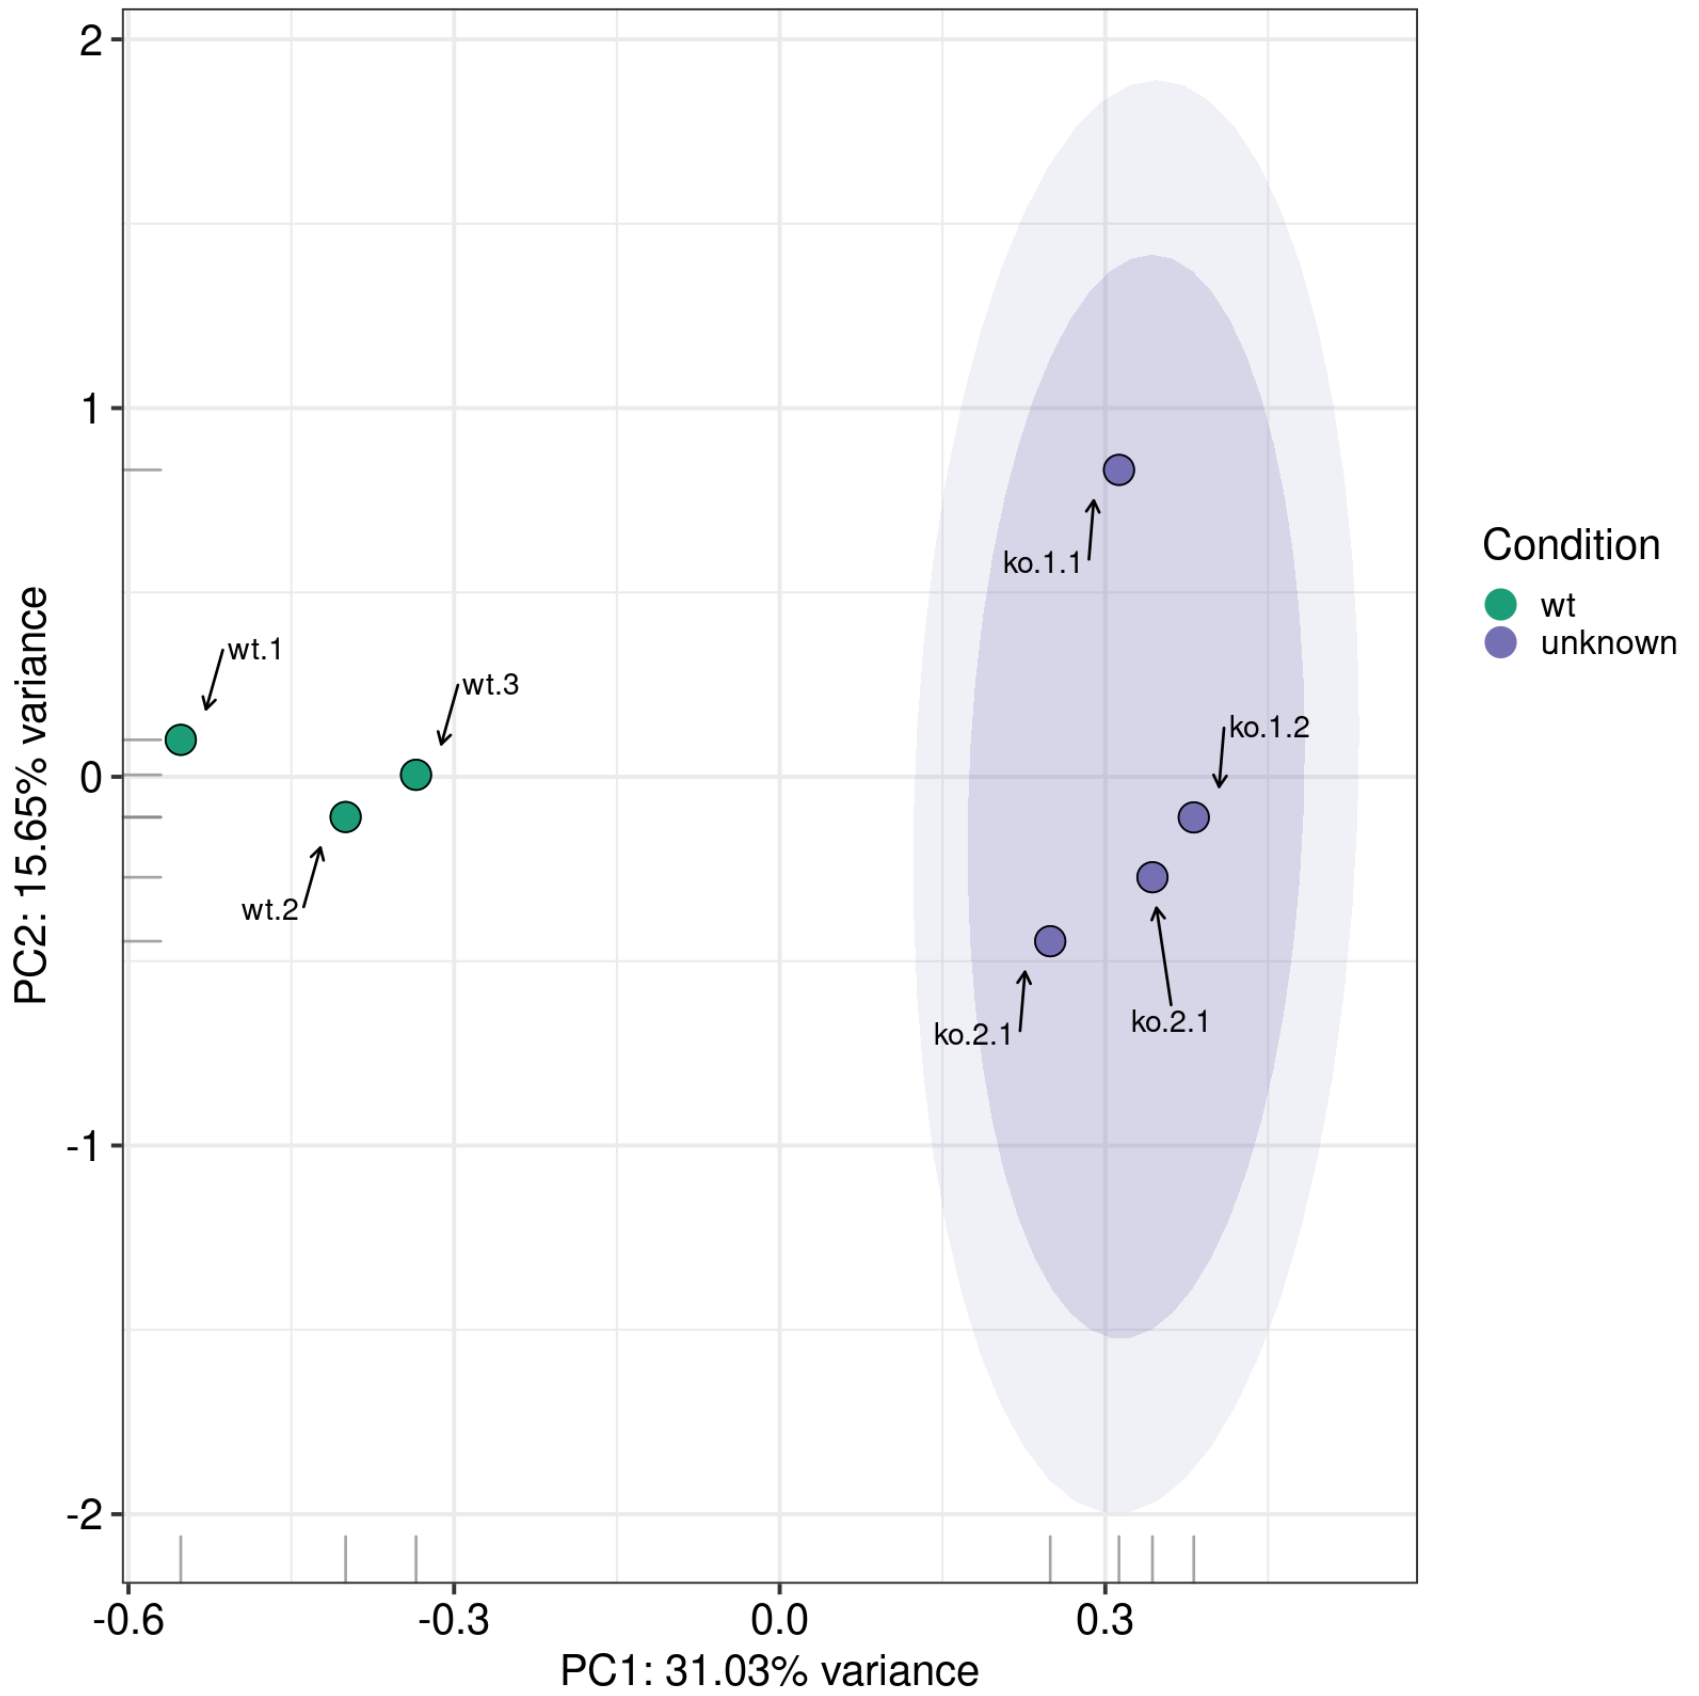

**Supplementary Table 1. Summary of samples collected, mapping statistics and experimental metadata for RNA-Seq analysis of epimastigote, trypomastigote and amastigote.**

**Table S1. Summary of samples collected and mapping statistics**

| Lab sample ID | Accession Number     | Alias used in some figures | Developmental stage | Clone     | Infected | Batch    | Number of reads that pass Illumina filter | Total number of reads mapped | % of total reads mapped | Reads mapped to <i>T. cruzi</i> CL Brener 8.1 | Reads mapped to <i>H. sapiens</i> hg38 | % of mapped reads belonging to <i>T. cruzi</i> CL Brener 8.1 | % of mapped reads belonging to <i>H. sapiens</i> hg38 |
|---------------|----------------------|----------------------------|---------------------|-----------|----------|----------|-------------------------------------------|------------------------------|-------------------------|-----------------------------------------------|----------------------------------------|--------------------------------------------------------------|-------------------------------------------------------|
| HPGL0475      | SAMN07291202         | CLBr.A60.1                 | Amastigote 60 hpi   | CL Brener | Y        | 20121216 | 122.215.032                               | 112.803.140                  | 92,30%                  | 14.141.199                                    | 98.661.941                             | 12,54%                                                       | 87%                                                   |
| HPGL0476      | SAMN07291204         | CLBr.A60.3                 |                     |           | Y        | 20121216 | 100.238.716                               | 92.420.686                   | 92,20%                  | 8.493.782                                     | 83.926.904                             | 9,19%                                                        | 91%                                                   |
| HPGL0482      | SAMN07291203         | CLBr.A60.2                 |                     |           | Y        | 20121216 | 94.665.058                                | 87.115.475                   | 92,02%                  | 8.947.962                                     | 78.167.513                             | 10,27%                                                       | 90%                                                   |
| HPGL0481      | SAMN07290964         | CLBr.Tryp.3                | Trypomastigote      | CL Brener | N        | 20140601 | 102.571.998                               | 92.052.266                   | 89,74%                  | 92.052.266                                    | NA                                     | 100,00%                                                      | NA                                                    |
| HPGL0490      | SAMN07290962         | CLBr.Tryp.1                |                     |           | N        | 19700101 | 93.463.730                                | 82.016.187                   | 87,75%                  | 82.016.187                                    | NA                                     | 100,00%                                                      | NA                                                    |
| HPGL0488      | SAMN07290963         | CLBr.Tryp.2                |                     |           | N        | 20140601 | 109.810.272                               | 98.242.222                   | 89,47%                  | 98.242.222                                    | NA                                     | 100,00%                                                      | NA                                                    |
| HPGL0483      | Pending: PRJNA389926 | CLBr.Epi.1                 | Epimastigote        | CL Brener | N        | 20140601 | 33.680.621                                | 24.932.294                   | 74,03%                  | 24.932.294                                    | NA                                     | 100,00%                                                      | NA                                                    |
| HPGL0486      | Pending: PRJNA389926 | CLBr.Epi.2                 |                     |           | N        | 20140508 | 49.547.924                                | 36.541.063                   | 73,75%                  | 36.541.063                                    | NA                                     | 100,00%                                                      | NA                                                    |
| HPGL0487      | Pending: PRJNA389926 | CLBr.Epi.3                 |                     |           | N        | 20140508 | 40.660.345                                | 29.823.376                   | 73,35%                  | 29.823.376                                    | NA                                     | 100,00%                                                      | NA                                                    |
| Total         |                      |                            |                     |           |          |          | 746.853.696                               | 655.946.709                  | 87,83%                  | 395.190.351                                   | 260.756.358                            | 60,25%                                                       | 40%                                                   |

| Alias used in some figures | Total number of reads mapped | Reads mapped to <i>T. cruzi</i> CL Brener 8.1 | Percent mapping |
|----------------------------|------------------------------|-----------------------------------------------|-----------------|
| CLB_ama60.1                | 112.803.140                  | 14.141.199                                    | 12,54%          |
| CLB_ama60.2                | 92.420.686                   | 8.493.782                                     | 9,19%           |
| CLB_ama60.3                | 87.115.475                   | 8.947.962                                     | 10,27%          |
| <b>CLB_ama60</b>           | <b>97446433,67</b>           | <b>10527647,67</b>                            | <b>10,67%</b>   |
| CL14_ama60.1               | 58.860.711                   | 4.205.223                                     | 7,14%           |
| CL14_ama60.2               | 105.055.679                  | 6.774.939                                     | 6,45%           |
| CL14_ama60.3               | 60.855.520                   | 3.909.457                                     | 6,42%           |
| <b>CL14_ama60</b>          | <b>74923970</b>              | <b>4963206,333</b>                            | <b>6,67%</b>    |
| CLB_trypo.1                | 92.052.266                   | 92.052.266                                    | 100,00%         |
| CLB_trypo.2                | 82.016.187                   | 82.016.187                                    | 100,00%         |
| CLB_trypo.3                | 98.242.222                   | 98.242.222                                    | 100,00%         |
| <b>CLB_tryp</b>            | <b>90770225</b>              | <b>90770225</b>                               | <b>100,00%</b>  |
| CL14_trypo.1               | 66.239.477                   | 66.239.477                                    | 100,00%         |
| CL14_trypo.2               | 61.965.400                   | 61.965.400                                    | 100,00%         |
| CL14_trypo.3               | 74.965.544                   | 74.965.544                                    | 100,00%         |
| <b>CL14_tryp</b>           | <b>67723473,67</b>           | <b>67723473,67</b>                            | <b>100,00%</b>  |
| CLB_epi.1                  | 58.695.502                   | 58.695.502                                    | 100,00%         |
| CLB_epi.2                  | 86.709.132                   | 86.709.132                                    | 100,00%         |
| CLB_epi.3                  | 70.999.582                   | 70.999.582                                    | 100,00%         |
|                            | <b>72134738,67</b>           | <b>72134738,67</b>                            | <b>100,00%</b>  |
| CL14_epi.1                 | 53.562.767                   | 53.562.767                                    | 100,00%         |
| CL14_epi.2                 | 69.654.101                   | 69.654.101                                    | 100,00%         |
| CL14_epi.3                 | 70.371.255                   | 70.371.255                                    | 100,00%         |
|                            | <b>64529374,33</b>           | <b>64529374,33</b>                            | <b>100,00%</b>  |
| <b>24</b>                  | <b>2.048.069.040</b>         | <b>1.086.849.589</b>                          | <b>53,07%</b>   |

**Supplementary Table 2. Differently expressed (DE) genes in CL Brener epimastigotes, tissue culture derived trypomastigotes and intracellular amastigotes.**

epi\_over\_ama

| geneid           | genedescription                                        | deseq_logfc | deseq_adjp |
|------------------|--------------------------------------------------------|-------------|------------|
| TcCLB.508741.80  | mucin TcSMUGS, putative                                | 7,293       | 5,33E-09   |
| TcCLB.509601.140 | hypothetical protein                                   | 6,868       | 2,264E-260 |
| TcCLB.510103.24  | hypothetical protein, conserved                        | 6,775       | 0          |
| TcCLB.506357.50  | alcohol dehydrogenase, putative                        | 6,692       | 4,579E-295 |
| TcCLB.509713.30  | hypothetical protein, conserved                        | 6,64        | 0          |
| TcCLB.508741.60  | mucin TcSMUGS, putative                                | 6,125       | 1,052E-29  |
| TcCLB.508017.30  | amino acid transporter, putative (fragment)            | 5,89        | 0          |
| TcCLB.511277.60  | alcohol dehydrogenase, putative                        | 5,877       | 1,114E-264 |
| TcCLB.511807.220 | hypothetical protein                                   | 5,787       | 3,725E-283 |
| TcCLB.508741.70  | mucin TcSMUGS, putative                                | 5,715       | 4,931E-26  |
| TcCLB.508741.50  | mucin TcSMUGS, putative                                | 5,626       | 0          |
| TcCLB.508741.40  | mucin TcSMUGS, putative                                | 5,62        | 9,907E-203 |
| TcCLB.510257.80  | cytosolic nonspecific dipeptidase, putative            | 5,544       | 0          |
| TcCLB.511685.20  | mucin TcSMUGS, putative                                | 5,522       | 1,844E-115 |
| TcCLB.511391.120 | glutamamyl carboxypeptidase, putative                  | 5,284       | 0          |
| TcCLB.509213.120 | cytosolic nonspecific dipeptidase, putative            | 5,279       | 0          |
| TcCLB.511003.160 | hypothetical protein, conserved                        | 5,277       | 4,819E-184 |
| TcCLB.503411.30  | hypothetical protein, conserved                        | 5,272       | 2,245E-19  |
| TcCLB.509767.140 | hypothetical protein                                   | 5,23        | 1,579E-136 |
| TcCLB.510679.100 | lipase, putative                                       | 5,107       | 1,923E-113 |
| TcCLB.507047.150 | D-arabinono-1,4-lactone oxidase, putative (ALO)        | 5,071       | 2,426E-98  |
| TcCLB.510357.20  | hypothetical protein, conserved                        | 5,054       | 9,182E-46  |
| TcCLB.506401.380 | surface protease GP63, putative                        | 4,954       | 9,832E-167 |
| TcCLB.511685.10  | mucin TcSMUGS, putative                                | 4,943       | 1,171E-88  |
| TcCLB.509041.10  | tyrosine aminotransferase, putative                    | 4,931       | 0,0001792  |
| TcCLB.509217.40  | trans-sialidase, Group V, putative                     | 4,827       | 0,00001215 |
| TcCLB.511685.30  | mucin TcSMUGS, putative                                | 4,811       | 6,586E-23  |
| TcCLB.511679.10  | mucin TcSMUGS, putative                                | 4,769       | 1,288E-38  |
| TcCLB.506551.10  | protein associated with differentiation 4, putative    | 4,76        | 7,121E-239 |
| TcCLB.506563.79  | calpain-like cysteine peptidase (pseudogene), putative | 4,755       | 1,109E-116 |
| TcCLB.508799.270 | protein associated with differentiation 4, putative    | 4,703       | 3,93E-255  |
| TcCLB.509003.30  | calpain-like cysteine peptidase, putative              | 4,701       | 1,542E-115 |
| TcCLB.509965.390 | amastin, putative                                      | 4,681       | 3,181E-87  |
| TcCLB.511201.49  | hypothetical protein, conserved                        | 4,647       | 2,102E-266 |
| TcCLB.506863.30  | hypothetical protein, conserved                        | 4,642       | 1,38E-23   |
| TcCLB.508545.40  | surface protease GP63, putative                        | 4,601       | 2,132E-230 |
| TcCLB.510187.50  | tyrosine aminotransferase                              | 4,54        | 0          |
| TcCLB.510795.10  | tyrosine aminotransferase (2.6.1.5)                    | 4,488       | 0          |
| TcCLB.511497.19  | amastin, putative                                      | 4,476       | 2,32E-72   |
| TcCLB.510535.100 | cysteine peptidase C (CPC), putative (TCCB)            | 4,472       | 0          |
| TcCLB.506753.130 | hypothetical protein, conserved                        | 4,408       | 8,41E-79   |
| TcCLB.506789.340 | hypothetical protein, conserved                        | 4,395       | 1,376E-88  |
| TcCLB.511779.60  | trans-sialidase, Group III, putative                   | 4,367       | 0,0007992  |

|                  |                                                          |       |            |
|------------------|----------------------------------------------------------|-------|------------|
| TcCLB.510187.40  | tyrosine aminotransferase                                | 4,359 | 6,23E-299  |
| TcCLB.507689.40  | glutamamyl carboxypeptidase, putative                    | 4,349 | 0          |
| TcCLB.511859.200 | hypothetical protein, conserved                          | 4,303 | 1,274E-258 |
| TcCLB.506789.352 | hypothetical protein, conserved                          | 4,284 | 2,195E-22  |
| TcCLB.506885.310 | meiotic recombination protein DMC1, putative (dmc1)      | 4,248 | 3,469E-91  |
| TcCLB.509051.20  | amastin, putative                                        | 4,206 | 1,911E-79  |
| TcCLB.503975.100 | Present in the outer mitochondrial membrane proteome 2:  | 4,178 | 4,847E-155 |
| TcCLB.508535.50  | tyrosine aminotransferase                                | 4,173 | 4,355E-97  |
| TcCLB.509965.394 | amastin, putative                                        | 4,156 | 5,22E-46   |
| TcCLB.508263.5   | hypothetical protein, conserved (fragment)               | 4,151 | 6,838E-53  |
| TcCLB.510837.9   | acetylornithine deacetylase, putative (fragment)         | 4,149 | 6,447E-36  |
| TcCLB.509205.120 | hypothetical protein, conserved                          | 4,143 | 1,15E-289  |
| TcCLB.509023.80  | hypothetical protein, conserved                          | 4,137 | 2,13E-157  |
| TcCLB.510565.11  | tyrosine aminotransferase, putative (fragment)           | 4,108 | 0          |
| TcCLB.509707.10  | protein associated with differentiation 8, putative      | 4,084 | 4,845E-39  |
| TcCLB.504149.175 | hypothetical protein, conserved                          | 4,071 | 2,938E-186 |
| TcCLB.511779.10  | trans-sialidase, putative                                | 4,041 | 0,002643   |
| TcCLB.508799.290 | hypothetical protein, conserved (fragment)               | 4,034 | 6,854E-222 |
| TcCLB.509769.40  | hypothetical protein, conserved                          | 4,034 | 1,448E-54  |
| TcCLB.510811.20  | protein associated with differentiation 4, putative      | 4,027 | 1,62E-108  |
| TcCLB.511825.240 | hypothetical protein, conserved                          | 4,027 | 1,499E-38  |
| TcCLB.507689.50  | metallo-peptidase, clan MH, family M18, putative (fragme | 4,005 | 0          |
| TcCLB.503413.4   | Present in the outer mitochondrial membrane proteome 2:  | 4,002 | 3,077E-82  |
| TcCLB.509197.50  | hypothetical protein, conserved                          | 3,979 | 1,438E-56  |
| TcCLB.509043.10  | tyrosine aminotransferase (pseudogene), putative         | 3,971 | 2,694E-132 |
| TcCLB.508175.360 | cystathionine beta-synthase (CBS)                        | 3,956 | 0,0005739  |
| TcCLB.507519.150 | Adenine phosphoribosyltransferase, putative              | 3,935 | 1,901E-85  |
| TcCLB.508999.260 | calpain-like cysteine peptidase (pseudogene), putative   | 3,895 | 3,409E-193 |
| TcCLB.506773.50  | nucleoside transporter-like, putative                    | 3,877 | 8,176E-232 |
| TcCLB.510187.70  | tyrosine aminotransferase, putative                      | 3,871 | 6,107E-158 |
| TcCLB.511827.100 | cysteine peptidase C (CPC), putative (TCCB)              | 3,86  | 2,898E-211 |
| TcCLB.503925.6   | hypothetical protein, conserved                          | 3,851 | 4,454E-37  |
| TcCLB.511437.30  | lipase, putative                                         | 3,841 | 2,699E-46  |
| TcCLB.507689.30  | glutamamyl carboxypeptidase, putative                    | 3,824 | 9,359E-177 |
| TcCLB.505789.20  | hypothetical protein, conserved                          | 3,801 | 3,441E-91  |
| TcCLB.510101.80  | hypothetical protein, conserved                          | 3,797 | 4,032E-52  |
| TcCLB.506563.170 | calpain-like cysteine peptidase (pseudogene), putative   | 3,769 | 1,265E-162 |
| TcCLB.503747.10  | glutamine aminotransferase, putative (fragment) (GlnAT)  | 3,753 | 2,732E-82  |
| TcCLB.504533.50  | hypothetical protein, conserved                          | 3,749 | 6,26E-86   |
| TcCLB.510357.30  | hypothetical protein, conserved                          | 3,747 | 1,935E-64  |
| TcCLB.508601.141 | dipeptidyl-peptidase, putative (fragment)                | 3,74  | 1,693E-176 |
| TcCLB.507657.20  | glutamamyl carboxypeptidase, putative                    | 3,734 | 0          |
| TcCLB.510187.30  | tyrosine aminotransferase                                | 3,683 | 5,263E-23  |
| TcCLB.507657.10  | glutamamyl carboxypeptidase, putative                    | 3,678 | 0          |
| TcCLB.507949.250 | hypothetical protein, conserved                          | 3,67  | 0          |

|                  |                                                               |       |            |
|------------------|---------------------------------------------------------------|-------|------------|
| TcCLB.508699.120 | dipeptidyl-peptidase, putative                                | 3,664 | 2,17E-232  |
| TcCLB.508173.160 | hypothetical protein, conserved                               | 3,648 | 1,805E-153 |
| TcCLB.509717.176 | retrotransposon hot spot (RHS) protein, putative (fragment)   | 3,646 | 1,875E-09  |
| TcCLB.504045.60  | thermostable carboxypeptidase 2, putative                     | 3,638 | 2E-266     |
| TcCLB.509463.10  | transmembrane amino acid transporter, putative                | 3,628 | 1,817E-138 |
| TcCLB.511367.240 | argonaute-like protein, putative                              | 3,617 | 4,378E-122 |
| TcCLB.507359.10  | hypothetical protein, conserved                               | 3,591 | 4,468E-25  |
| TcCLB.507143.20  | hypothetical protein, conserved                               | 3,589 | 4,044E-92  |
| TcCLB.506177.100 | actyltransferase-like, putative                               | 3,57  | 1,491E-45  |
| TcCLB.509179.100 | L-galactonolactone oxidase (ALO)                              | 3,558 | 3,094E-95  |
| TcCLB.507819.30  | trans-sialidase, Group II, putative                           | 3,554 | 1,031E-54  |
| TcCLB.509683.90  | hypothetical protein                                          | 3,552 | 9,022E-53  |
| TcCLB.508033.39  | mucin-associated surface protein (MASP, pseudogene), putative | 3,545 | 2,871E-34  |
| TcCLB.504765.20  | protein associated with differentiation 8, putative           | 3,545 | 2,562E-13  |
| TcCLB.507187.9   | dispersed gene family protein 1 (DGF-1), putative             | 3,523 | 4,946E-100 |
| TcCLB.510381.10  | cystathionine beta-synthase, putative                         | 3,516 | 7,488E-09  |
| TcCLB.506247.220 | histidine ammonia-lyase, putative                             | 3,514 | 1,55E-260  |
| TcCLB.506227.10  | amino acid transporter, putative                              | 3,475 | 9,074E-109 |
| TcCLB.508647.180 | hypothetical protein, conserved                               | 3,47  | 3,039E-87  |
| TcCLB.508863.10  | hypothetical protein, conserved                               | 3,469 | 2,965E-77  |
| TcCLB.504421.19  | hypothetical protein, conserved                               | 3,466 | 1,922E-90  |
| TcCLB.508065.70  | protein associated with differentiation 8, putative           | 3,461 | 1,336E-65  |
| TcCLB.511041.40  | hexose transporter, putative                                  | 3,453 | 4,683E-36  |
| TcCLB.510977.9   | hypothetical protein, conserved (fragment)                    | 3,451 | 3,043E-140 |
| TcCLB.506001.90  | retrotransposon hot spot (RHS) protein, putative              | 3,442 | 3,585E-114 |
| TcCLB.504003.30  | hypothetical protein                                          | 3,43  | 9,329E-108 |
| TcCLB.510855.10  | peptide methionine sulfoxide reductase, putative              | 3,423 | 1,589E-153 |
| TcCLB.506213.50  | prostaglandin F synthase (pseudogene), putative (PGFS)        | 3,403 | 6,405E-153 |
| TcCLB.506513.110 | peptidase t, putative                                         | 3,398 | 2,783E-119 |
| TcCLB.510605.10  | hypothetical protein, conserved                               | 3,388 | 1,212E-56  |
| TcCLB.401961.10  | trans-sialidase, putative (fragment)                          | 3,368 | 0,01501    |
| TcCLB.503837.20  | amino acid transporter, putative                              | 3,366 | 3,449E-114 |
| TcCLB.506753.140 | hypothetical protein, conserved                               | 3,364 | 1,279E-72  |
| TcCLB.510877.170 | hypothetical protein, conserved                               | 3,362 | 1,424E-134 |
| TcCLB.503697.70  | hypothetical protein, conserved                               | 3,36  | 2,186E-79  |
| TcCLB.506773.10  | hypothetical protein, conserved                               | 3,346 | 0,01548    |
| TcCLB.510837.20  | glutamamyl carboxypeptidase, putative                         | 3,336 | 3,181E-24  |
| TcCLB.506325.10  | retrotransposon hot spot (RHS) protein, putative              | 3,334 | 6,319E-40  |
| TcCLB.509569.100 | nucleoside phosphorylase, putative                            | 3,332 | 3,896E-198 |
| TcCLB.509331.120 | hypothetical protein, conserved                               | 3,319 | 1,987E-66  |
| TcCLB.506879.10  | mucin-associated surface protein (MASP), putative             | 3,315 | 0,0004173  |
| TcCLB.509153.20  | hypothetical protein, conserved                               | 3,313 | 5,417E-42  |
| TcCLB.507019.20  | nitrate reductase, putative                                   | 3,309 | 1,377E-112 |
| TcCLB.510905.10  | dispersed gene family protein 1 (DGF-1), putative             | 3,302 | 7,271E-06  |
| TcCLB.511691.10  | cystathionine beta-synthase (CBS)                             | 3,301 | 6,734E-20  |



|                  |                                                           |       |            |
|------------------|-----------------------------------------------------------|-------|------------|
| TcCLB.510613.40  | hypothetical protein, conserved (fragment)                | 3,299 | 1,466E-21  |
| TcCLB.508045.131 | retrotransposon hot spot protein (RHS, pseudogene), putat | 3,289 | 1,32E-09   |
| TcCLB.504425.60  | NADP-dependent alcohol hydrogenase, putative              | 3,286 | 2,304E-115 |
| TcCLB.509805.190 | hypothetical protein, conserved                           | 3,285 | 4,561E-67  |
| TcCLB.509331.74  | hypothetical protein, conserved                           | 3,245 | 8,7E-74    |
| TcCLB.504393.20  | hypothetical protein                                      | 3,239 | 0,02463    |
| TcCLB.504105.220 | hypothetical protein, conserved                           | 3,232 | 1,248E-69  |
| TcCLB.507603.220 | hypothetical protein                                      | 3,228 | 3,877E-51  |
| TcCLB.511439.40  | hypothetical protein                                      | 3,222 | 4,195E-167 |
| TcCLB.504033.21  | UDP-Gal or UDP-GlcNAc-dependent glycosyltransferase, pu   | 3,22  | 1,968E-07  |
| TcCLB.508917.49  | peptidase t, putative                                     | 3,219 | 2,345E-37  |
| TcCLB.508439.40  | hypothetical protein                                      | 3,214 | 0,0002256  |
| TcCLB.508039.70  | hypothetical protein, conserved                           | 3,213 | 6,752E-140 |
| TcCLB.511691.39  | hypothetical protein, conserved                           | 3,209 | 2,399E-136 |
| TcCLB.511207.10  | hypothetical protein, conserved                           | 3,207 | 4,041E-79  |
| TcCLB.503445.9   | retrotransposon hot spot (RHS) protein, putative          | 3,205 | 1,117E-55  |
| TcCLB.508805.80  | short chain dehydrogenase, putative                       | 3,202 | 1,033E-49  |
| TcCLB.507247.14  | dispersed gene family protein 1 (DGF-1), putative (fragme | 3,188 | 8,983E-53  |
| TcCLB.508241.140 | cystathionine beta-synthase, putative (CBS)               | 3,175 | 2,31E-26   |
| TcCLB.510643.40  | trans-sialidase, Group VIII, putative                     | 3,173 | 2,23E-12   |
| TcCLB.510679.40  | hypothetical protein                                      | 3,171 | 9,155E-145 |
| TcCLB.508823.20  | hypothetical protein, conserved                           | 3,17  | 2,662E-157 |
| TcCLB.510065.5   | hypothetical protein, conserved (fragment)                | 3,17  | 2,839E-42  |
| TcCLB.507891.29  | flagellar calcium-binding protein, putative               | 3,169 | 0,0001865  |
| TcCLB.506011.10  | hypothetical protein, conserved                           | 3,159 | 2,996E-105 |
| TcCLB.506559.410 | hypothetical protein, conserved                           | 3,152 | 2,213E-142 |
| TcCLB.508919.10  | peptidase T (pseudogene), putative                        | 3,151 | 2,615E-38  |
| TcCLB.505615.20  | lipase (pseudogene), putative                             | 3,15  | 0,00001984 |
| TcCLB.511245.180 | guanine nucleotide-binding protein, putative              | 3,141 | 2,133E-77  |
| TcCLB.462761.16  | hypothetical protein, conserved (fragment)                | 3,14  | 8,77E-30   |
| TcCLB.511047.70  | hypothetical protein, conserved                           | 3,135 | 1,504E-171 |
| TcCLB.510729.110 | meiotic recombination protein DMC1, putative (dmc1)       | 3,135 | 7,276E-100 |
| TcCLB.507117.9   | dispersed gene family protein 1 (DGF-1), putative         | 3,129 | 2,106E-37  |
| TcCLB.510483.280 | 90 kDa surface protein, putative                          | 3,129 | 1,572E-18  |
| TcCLB.503419.30  | thiol-dependent reductase 1, putative (TcAc2)             | 3,128 | 5,708E-204 |
| TcCLB.509107.9   | hypothetical protein, conserved (fragment)                | 3,127 | 2,785E-25  |
| TcCLB.505047.19  | trans-sialidase (pseudogene), putative                    | 3,126 | 0,001112   |
| TcCLB.510063.30  | hypothetical protein, conserved                           | 3,118 | 6,072E-108 |
| TcCLB.503975.40  | hypothetical protein, conserved                           | 3,111 | 4,871E-146 |
| TcCLB.426675.9   | trans-sialidase, putative                                 | 3,104 | 0,0001024  |
| TcCLB.429257.20  | cytochrome b5-dependent oleate desaturase                 | 3,103 | 5,711E-114 |
| TcCLB.511209.69  | membrane-bound acid phosphatase, putative (fragment)      | 3,088 | 5,885E-70  |
| TcCLB.508827.50  | DNA repair and recombination helicase protein PIF3, putat | 3,087 | 2,283E-102 |
| TcCLB.508735.100 | hypothetical protein, conserved                           | 3,072 | 9,044E-107 |
| TcCLB.508999.250 | calpain-like cysteine peptidase (pseudogene), putative    | 3,068 | 2,283E-129 |

|                  |                                                           |       |            |
|------------------|-----------------------------------------------------------|-------|------------|
| TcCLB.507473.40  | retrotransposon hot spot protein (RHS, pseudogene), putat | 3,068 | 2,656E-52  |
| TcCLB.506905.50  | cystathionine beta-synthase (CBS)                         | 3,066 | 0          |
| TcCLB.511051.10  | hypothetical protein                                      | 3,064 | 1,879E-29  |
| TcCLB.506779.140 | hypothetical protein, conserved                           | 3,055 | 1,232E-101 |
| TcCLB.508003.10  | retrotransposon hot spot (RHS) protein, putative          | 3,054 | 9,579E-50  |
| TcCLB.510347.29  | hypothetical protein, conserved                           | 3,053 | 7,191E-46  |
| TcCLB.508689.40  | hypothetical protein, conserved                           | 3,043 | 7,719E-114 |
| TcCLB.511575.130 | folate/pteridine transporter, putative                    | 3,04  | 6,218E-200 |
| TcCLB.504339.19  | NADP-dependent alcohol hydrogenase, putative              | 3,036 | 0,00004197 |
| TcCLB.509705.10  | cellulosomal scaffoldin anchoring protein, putative       | 3,026 | 1,477E-52  |
| TcCLB.506947.10  | hypothetical protein, conserved                           | 3,021 | 1,426E-72  |
| TcCLB.503459.10  | hypothetical protein, conserved                           | 3,021 | 3,806E-36  |
| TcCLB.511309.60  | hypothetical protein, conserved                           | 3,017 | 7,692E-34  |
| TcCLB.505971.10  | UDP-Gal or UDP-GlcNAc-dependent glycosyltransferase, pu   | 3,01  | 3,753E-11  |
| TcCLB.507473.30  | trans-sialidase, Group II, putative                       | 3,007 | 7,002E-28  |
| TcCLB.507115.20  | dispersed gene family protein 1 (DGF-1), putative         | 3,001 | 3,376E-31  |
| TcCLB.508177.110 | cystathionine beta-synthase                               | 2,998 | 6,313E-168 |
| TcCLB.508177.120 | cystathionine beta-synthase (CBS)                         | 2,997 | 7,574E-260 |
| TcCLB.503713.30  | 6-phosphogluconolactonase, putative                       | 2,997 | 9,363E-68  |
| TcCLB.505193.100 | Present in the outer mitochondrial membrane proteome 1    | 2,996 | 5,036E-60  |
| TcCLB.506909.60  | mucin TcMUCI, putative                                    | 2,981 | 0,02959    |
| TcCLB.506931.4   | hypothetical protein, conserved                           | 2,98  | 7,302E-103 |
| TcCLB.510517.40  | hypothetical protein                                      | 2,974 | 1,661E-74  |
| TcCLB.475133.10  | trans-sialidase, putative                                 | 2,973 | 0,0002826  |
| TcCLB.508055.30  | trans-sialidase, Group II, putative                       | 2,972 | 6,063E-25  |
| TcCLB.511777.10  | trans-sialidase, putative (fragment)                      | 2,97  | 0,002146   |
| TcCLB.509367.30  | dispersed gene family protein 1 (DGF-1, pseudogene), puta | 2,966 | 5,342E-22  |
| TcCLB.510187.20  | tyrosine aminotransferase, putative                       | 2,964 | 3,637E-142 |
| TcCLB.509457.50  | retrotransposon hot spot (RHS) protein, putative          | 2,962 | 3,037E-22  |
| TcCLB.404455.10  | trans-sialidase, putative (fragment)                      | 2,956 | 1,966E-18  |
| TcCLB.506563.120 | hypothetical protein, conserved                           | 2,955 | 6,854E-63  |
| TcCLB.506825.40  | hypothetical protein, conserved                           | 2,953 | 5,645E-23  |
| TcCLB.503683.11  | RNA-binding protein, putative                             | 2,952 | 3,458E-13  |
| TcCLB.510065.10  | hypothetical protein, conserved                           | 2,95  | 1,627E-153 |
| TcCLB.505609.40  | trans-sialidase, Group V, putative                        | 2,947 | 0,00199    |
| TcCLB.413409.10  | trans-sialidase, putative (fragment)                      | 2,943 | 4,01E-35   |
| TcCLB.508177.129 | cystathionine beta-synthase, putative                     | 2,939 | 1,087E-224 |
| TcCLB.509997.10  | hypothetical protein, conserved                           | 2,939 | 5,698E-20  |
| TcCLB.506195.120 | lysosomal alpha-mannosidase precursor, putative           | 2,936 | 1,422E-88  |
| TcCLB.507831.20  | hypothetical protein, conserved                           | 2,932 | 0,002866   |
| TcCLB.510667.120 | galactokinase, putative                                   | 2,93  | 2,755E-126 |
| TcCLB.507085.140 | mucin TcMUCII, putative                                   | 2,928 | 0,0002868  |
| TcCLB.508827.10  | membrane-bound acid phosphatase, putative                 | 2,922 | 1,161E-106 |
| TcCLB.508801.10  | protein associated with differentiation 4, putative       | 2,92  | 8,734E-118 |
| TcCLB.506739.99  | zinc finger (CCCH type) protein, putative                 | 2,915 | 6,318E-232 |

|                  |                                                               |       |            |
|------------------|---------------------------------------------------------------|-------|------------|
| TcCLB.508897.119 | FKBP-type peptidylprolyl cis-trans isomerase, putative        | 2,905 | 1,436E-57  |
| TcCLB.511421.185 | hypothetical protein, conserved                               | 2,903 | 3,616E-27  |
| TcCLB.506937.10  | cytosolic malate dehydrogenase, putative                      | 2,9   | 2,747E-78  |
| TcCLB.511149.210 | mucin TcMUCII, putative                                       | 2,872 | 0,00002839 |
| TcCLB.511911.90  | hypothetical protein, conserved                               | 2,868 | 6,46E-96   |
| TcCLB.503939.20  | hypothetical protein, conserved                               | 2,863 | 7,562E-78  |
| TcCLB.506825.200 | hypothetical protein                                          | 2,857 | 3,403E-177 |
| TcCLB.509457.60  | retrotransposon hot spot (RHS) protein, putative              | 2,852 | 2,461E-17  |
| TcCLB.510853.10  | dispersed gene family protein 1 (DGF-1, pseudogene), putative | 2,844 | 1,258E-31  |
| TcCLB.508503.20  | cytochrome c oxidase subunit V, putative                      | 2,841 | 5,923E-206 |
| TcCLB.510301.30  | hypothetical protein, conserved                               | 2,839 | 2,295E-40  |
| TcCLB.504137.100 | hypothetical protein, conserved                               | 2,837 | 9,559E-78  |
| TcCLB.511639.20  | hypothetical protein, conserved                               | 2,835 | 2,522E-144 |
| TcCLB.509713.10  | protein associated with differentiation 4, putative           | 2,833 | 0          |
| TcCLB.510039.40  | nitrilase, putative                                           | 2,83  | 5,695E-163 |
| TcCLB.509545.70  | mucin TcMUCII, putative                                       | 2,824 | 0,01803    |
| TcCLB.511287.49  | aldo-keto reductase (AKR)                                     | 2,823 | 1,717E-95  |
| TcCLB.508241.10  | glycerol-3-phosphate dehydrogenase, putative                  | 2,82  | 5,575E-81  |
| TcCLB.511923.10  | mucin-associated surface protein (MASP, pseudogene), putative | 2,816 | 0,05152    |
| TcCLB.511639.9   | hypothetical protein, conserved                               | 2,811 | 5,248E-42  |
| TcCLB.511817.40  | NADH-cytochrome b5 reductase, putative                        | 2,808 | 4,851E-103 |
| TcCLB.511793.30  | mucin-associated surface protein (MASP), putative             | 2,807 | 0,04639    |
| TcCLB.507923.10  | L-threonine 3-dehydrogenase, putative                         | 2,806 | 5,315E-234 |
| TcCLB.506181.104 | acyltransferase-like protein                                  | 2,806 | 6,133E-52  |
| TcCLB.403481.10  | trans-sialidase, putative (fragment)                          | 2,803 | 0,01839    |
| TcCLB.511613.189 | mucin TcMUCII, putative                                       | 2,802 | 0,00003532 |
| TcCLB.511277.140 | serine/threonine protein kinase, putative                     | 2,801 | 6,346E-56  |
| TcCLB.510187.100 | glucokinase                                                   | 2,798 | 1,013E-100 |
| TcCLB.509331.210 | NADP-dependent alcohol hydrogenase, putative                  | 2,795 | 2,891E-40  |
| TcCLB.504005.54  | hypothetical protein, conserved                               | 2,79  | 8,646E-76  |
| TcCLB.508809.40  | hypothetical protein, conserved                               | 2,789 | 6,723E-38  |
| TcCLB.506763.30  | mucin-associated surface protein (MASP), putative             | 2,784 | 0,04219    |
| TcCLB.511753.120 | L-threonine 3-dehydrogenase, putative                         | 2,783 | 5,371E-267 |
| TcCLB.508303.10  | alanine racemase 2, putative                                  | 2,782 | 1,87E-71   |
| TcCLB.507255.20  | trans-sialidase, Group II, putative                           | 2,769 | 4,152E-51  |
| TcCLB.508501.110 | mucin TcMUCII, putative                                       | 2,767 | 7,469E-06  |
| TcCLB.507009.40  | galactokinase, putative                                       | 2,754 | 5,35E-89   |
| TcCLB.509999.140 | RNA-binding protein, putative                                 | 2,747 | 6,087E-12  |
| TcCLB.508595.40  | cysteine peptidase, putative                                  | 2,744 | 1,052E-109 |
| TcCLB.506257.98  | hypothetical protein, conserved (pseudogene)                  | 2,744 | 1,847E-64  |
| TcCLB.506025.4   | membrane-bound acid phosphatase, putative (fragment)          | 2,743 | 7,433E-91  |
| TcCLB.504153.110 | hypothetical protein, conserved                               | 2,739 | 1,353E-72  |
| TcCLB.506147.9   | prostaglandin F2alpha synthase (TcPGFS)                       | 2,734 | 5,931E-182 |
| TcCLB.508139.130 | trans-sialidase, Group II, putative                           | 2,733 | 8,875E-81  |
| TcCLB.506319.60  | hypothetical protein, conserved                               | 2,732 | 1,398E-40  |

|                  |                                                           |       |            |
|------------------|-----------------------------------------------------------|-------|------------|
| TcCLB.508535.10  | NADH-dependent fumarate reductase, putative               | 2,729 | 8,797E-234 |
| TcCLB.509641.79  | hypothetical protein, conserved (fragment)                | 2,724 | 2,322E-37  |
| TcCLB.508923.10  | amino acid permease, putative                             | 2,722 | 4,793E-68  |
| TcCLB.506485.10  | hypothetical protein, conserved                           | 2,721 | 3,676E-37  |
| TcCLB.504557.10  | UDP-Gal or UDP-GlcNAc-dependent glycosyltransferase, pu   | 2,719 | 1,487E-23  |
| TcCLB.508405.70  | protein kinase, putative                                  | 2,716 | 7,073E-72  |
| TcCLB.510345.9   | protein kinase, putative (fragment)                       | 2,715 | 3,852E-12  |
| TcCLB.511295.10  | FKBP-type peptidylprolyl cis-trans isomerase, putative    | 2,712 | 1,585E-54  |
| TcCLB.508677.80  | NADP-dependent alcohol hydrogenase, putative              | 2,712 | 2,149E-42  |
| TcCLB.506563.180 | calpain-like cysteine peptidase (pseudogene), putative    | 2,71  | 1,406E-82  |
| TcCLB.508761.260 | mucin TcMUCII, putative                                   | 2,71  | 3,621E-14  |
| TcCLB.511303.34  | Macro domain containing protein, putative                 | 2,708 | 1,757E-57  |
| TcCLB.506779.200 | glycerol-3-phosphate dehydrogenase (pseudogene), putati   | 2,707 | 6,657E-112 |
| TcCLB.507167.240 | retrotransposon hot spot (RHS) protein, putative          | 2,699 | 7,508E-43  |
| TcCLB.505373.10  | retrotransposon hot spot (RHS) protein, putative          | 2,697 | 8,42E-63   |
| TcCLB.506125.20  | hypothetical protein, conserved                           | 2,694 | 3,569E-80  |
| TcCLB.510131.44  | hypothetical protein, conserved                           | 2,679 | 6,665E-67  |
| TcCLB.427013.10  | trans-sialidase, putative (fragment)                      | 2,675 | 2,964E-20  |
| TcCLB.507153.30  | dispersed gene family protein 1 (DGF-1), putative         | 2,671 | 1,01E-58   |
| TcCLB.509287.230 | trans-sialidase, Group II, putative                       | 2,666 | 2,8E-76    |
| TcCLB.506993.110 | mucin TcMUCII, putative                                   | 2,663 | 0,00001867 |
| TcCLB.508257.30  | hypothetical protein, conserved                           | 2,662 | 1,164E-43  |
| TcCLB.511479.39  | hypothetical protein, conserved                           | 2,659 | 3,265E-63  |
| TcCLB.508081.30  | mucin-associated surface protein (MASP), putative         | 2,654 | 0,06565    |
| TcCLB.504045.55  | hypothetical protein, conserved                           | 2,646 | 3,542E-115 |
| TcCLB.508831.110 | serine/threonine kinase, putative                         | 2,646 | 3,058E-46  |
| TcCLB.510561.35  | hypothetical protein                                      | 2,646 | 0,00771    |
| TcCLB.508425.10  | dispersed gene family protein 1 (DGF-1), putative         | 2,638 | 7,267E-08  |
| TcCLB.503841.80  | NADH-dependent fumarate reductase, putative               | 2,634 | 4,815E-21  |
| TcCLB.510213.110 | NADH-dependent fumarate reductase, putative               | 2,633 | 5,463E-32  |
| TcCLB.504127.20  | hypothetical protein                                      | 2,632 | 2,423E-29  |
| TcCLB.504045.110 | urocanate hydratase, putative                             | 2,631 | 7,386E-218 |
| TcCLB.504223.10  | amino acid permease, putative                             | 2,623 | 3,208E-82  |
| TcCLB.510655.120 | aminopeptidase P, putative                                | 2,618 | 6,064E-121 |
| TcCLB.508611.30  | surface protease GP63, putative                           | 2,618 | 3,861E-32  |
| TcCLB.506789.160 | hypothetical protein, conserved                           | 2,617 | 2,945E-90  |
| TcCLB.506593.60  | nicotinamidase, putative (PNC1)                           | 2,615 | 6,441E-94  |
| TcCLB.506549.9   | dispersed gene family protein 1 (DGF-1), putative (fragme | 2,614 | 1,448E-75  |
| TcCLB.503969.20  | hypothetical protein, conserved                           | 2,613 | 0,003078   |
| TcCLB.506399.80  | hypothetical protein, conserved                           | 2,611 | 2,008E-49  |
| TcCLB.509601.59  | protoheme IX farnesyltransferase, putative                | 2,61  | 2,58E-110  |
| TcCLB.510751.4   | aminopeptidase P, putative                                | 2,608 | 3,545E-100 |
| TcCLB.511325.40  | amino acid permease, putative                             | 2,608 | 6,012E-77  |
| TcCLB.438313.9   | dispersed gene family protein 1 (DGF-1), putative         | 2,606 | 2,038E-49  |
| TcCLB.511277.500 | hypothetical protein, conserved                           | 2,601 | 2,894E-41  |

|                  |                                                           |       |            |
|------------------|-----------------------------------------------------------|-------|------------|
| TcCLB.506355.10  | glucose transporter                                       | 2,597 | 8,236E-85  |
| TcCLB.509229.60  | hypothetical protein, conserved                           | 2,596 | 6,593E-36  |
| TcCLB.504223.30  | hypothetical protein, conserved (fragment)                | 2,595 | 1,529E-08  |
| TcCLB.509713.20  | protein associated with differentiation 4, putative       | 2,59  | 0          |
| TcCLB.506629.200 | 1,2-Dihydroxy-3-keto-5-methylthiopentene dioxygenase, pu  | 2,589 | 6,845E-146 |
| TcCLB.509153.10  | hypothetical protein, conserved                           | 2,588 | 3,113E-133 |
| TcCLB.510299.20  | hypothetical protein, conserved                           | 2,588 | 5,075E-59  |
| TcCLB.508609.10  | surface protease GP63, putative                           | 2,588 | 5,121E-37  |
| TcCLB.464807.10  | serine/threonine protein kinase, putative                 | 2,587 | 3,523E-35  |
| TcCLB.503943.14  | hypothetical protein, conserved                           | 2,583 | 2,765E-70  |
| TcCLB.510249.30  | hypothetical protein, conserved                           | 2,583 | 3,023E-13  |
| TcCLB.509177.50  | hypothetical protein, conserved                           | 2,582 | 1,426E-55  |
| TcCLB.504933.10  | calpain-like cysteine peptidase, putative                 | 2,582 | 3,331E-37  |
| TcCLB.506775.180 | hypothetical protein, conserved                           | 2,581 | 1,876E-139 |
| TcCLB.509463.41  | retrotransposon hot spot (RHS) protein, putative (fragmen | 2,577 | 3,117E-93  |
| TcCLB.511545.80  | L-Lysine transport protein                                | 2,575 | 2,851E-106 |
| TcCLB.508799.280 | protein associated with differentiation 4, putative       | 2,573 | 1,012E-89  |
| TcCLB.508551.39  | hexose transporter, putative                              | 2,565 | 5,623E-51  |
| TcCLB.507237.80  | mucin-associated surface protein (MASP), putative         | 2,56  | 0,009281   |
| TcCLB.440219.10  | trans-sialidase, putative (fragment)                      | 2,559 | 2,217E-48  |
| TcCLB.402919.10  | trans-sialidase, putative                                 | 2,559 | 7,621E-12  |
| TcCLB.508109.20  | mucin TcMUCII, putative                                   | 2,558 | 0,00001731 |
| TcCLB.503837.10  | hypothetical protein, conserved                           | 2,552 | 4,464E-114 |
| TcCLB.509157.220 | hypothetical protein, conserved                           | 2,551 | 1,349E-66  |
| TcCLB.508399.10  | NADH-ubiquinone oxidoreductase, mitochondrial, putative   | 2,55  | 6,567E-89  |
| TcCLB.506789.280 | methylthioadenosine phosphorylase, putative               | 2,549 | 2,944E-89  |
| TcCLB.507101.10  | amino acid permease, putative                             | 2,541 | 9,575E-84  |
| TcCLB.508461.80  | prostaglandin F2alpha synthase (TcPGFS)                   | 2,537 | 2,047E-263 |
| TcCLB.510739.19  | cystathione gamma lyase, putative (fragment)              | 2,535 | 8,261E-33  |
| TcCLB.509459.79  | actin interacting protein-like protein, putative          | 2,531 | 1,227E-45  |
| TcCLB.507919.10  | surface protease GP63, putative                           | 2,529 | 8,185E-48  |
| TcCLB.508651.20  | cytochrome c oxidase subunit 10, putative                 | 2,528 | 2,399E-67  |
| TcCLB.510667.140 | ribulose-phosphate 3-epimerase, putative                  | 2,525 | 3,059E-27  |
| TcCLB.506777.64  | hypothetical protein, conserved                           | 2,52  | 3,462E-26  |
| TcCLB.506195.290 | hypothetical protein, conserved                           | 2,518 | 3,361E-82  |
| TcCLB.508501.250 | UMP-CMP kinase, mitochondrial, putative                   | 2,516 | 5,152E-60  |
| TcCLB.509319.90  | trypanothione synthetase (TRYS)                           | 2,514 | 1,239E-70  |
| TcCLB.508451.60  | trans-sialidase, Group II, putative                       | 2,511 | 0,0001621  |
| TcCLB.507125.10  | trans-sialidase, Group II, putative                       | 2,506 | 1,201E-16  |
| TcCLB.511129.60  | hypothetical protein, conserved                           | 2,505 | 6,047E-57  |
| TcCLB.510989.30  | guanine nucleotide-binding protein, putative              | 2,5   | 8,219E-40  |
| TcCLB.506355.100 | hexose transporter (pseudogene), putative                 | 2,498 | 7,255E-84  |
| TcCLB.508837.189 | endoplasmic reticulum oxidoreductin, putative             | 2,497 | 2,503E-88  |
| TcCLB.510603.169 | hypothetical protein, conserved                           | 2,496 | 8,53E-14   |
| TcCLB.511051.59  | hypothetical protein, conserved                           | 2,491 | 2,732E-112 |

|                  |                                                            |       |            |
|------------------|------------------------------------------------------------|-------|------------|
| TcCLB.506323.30  | retrotransposon hot spot (RHS) protein, putative           | 2,491 | 1,188E-80  |
| TcCLB.508177.90  | hypothetical protein, conserved                            | 2,491 | 2,276E-76  |
| TcCLB.507837.20  | protein kinase, putative                                   | 2,485 | 3,901E-54  |
| TcCLB.507809.39  | hypothetical protein, conserved                            | 2,483 | 1,132E-28  |
| TcCLB.508495.170 | mucin TcMUCII, putative                                    | 2,483 | 1,73E-08   |
| TcCLB.509615.50  | hypothetical protein                                       | 2,478 | 0,003645   |
| TcCLB.511687.19  | voltage-dependent anion-selective channel, putative (fragr | 2,476 | 4,587E-09  |
| TcCLB.510155.110 | hypothetical protein, conserved                            | 2,475 | 1,86E-73   |
| TcCLB.504983.10  | hypothetical protein                                       | 2,475 | 4,846E-45  |
| TcCLB.509237.151 | calpain-like cysteine peptidase, putative (fragment)       | 2,47  | 5,872E-53  |
| TcCLB.504065.10  | retrotransposon hot spot protein (RHS, pseudogene), putat  | 2,47  | 3,527E-43  |
| TcCLB.511909.30  | hypothetical protein, conserved                            | 2,467 | 1,345E-43  |
| TcCLB.511289.90  | hypothetical protein, conserved                            | 2,462 | 3,909E-99  |
| TcCLB.510605.19  | hypothetical protein, conserved                            | 2,457 | 8,711E-103 |
| TcCLB.506355.5   | hexose transporter, putative                               | 2,456 | 2,814E-27  |
| TcCLB.506275.121 | hypothetical protein                                       | 2,456 | 0,004325   |
| TcCLB.511527.70  | Unconventional myosin                                      | 2,455 | 7,905E-91  |
| TcCLB.506625.230 | hypothetical protein, conserved                            | 2,454 | 4,377E-24  |
| TcCLB.511073.10  | fatty acid desaturase, putative                            | 2,451 | 6,293E-91  |
| TcCLB.510749.99  | aminopeptidase P, putative                                 | 2,45  | 2,431E-19  |
| TcCLB.510741.10  | cystathione gamma lyase, putative                          | 2,447 | 9,678E-44  |
| TcCLB.507167.70  | retrotransposon hot spot (RHS) protein, putative           | 2,446 | 3,601E-42  |
| TcCLB.510811.10  | protein associated with differentiation 4, putative        | 2,446 | 1,842E-20  |
| TcCLB.510101.330 | hypothetical protein, conserved                            | 2,443 | 1,399E-98  |
| TcCLB.509617.80  | ABC transporter, putative                                  | 2,441 | 1,021E-49  |
| TcCLB.506993.20  | mucin TcMUCI, putative                                     | 2,44  | 0,01394    |
| TcCLB.420293.20  | trans-sialidase, Group II, putative                        | 2,437 | 4,043E-29  |
| TcCLB.509703.10  | cellulosomal scaffoldin anchoring protein, putative        | 2,436 | 2,099E-40  |
| TcCLB.511361.4   | hypothetical protein, conserved                            | 2,426 | 0,0001757  |
| TcCLB.509963.40  | dispersed gene family protein 1 (DGF-1), putative          | 2,425 | 2,971E-46  |
| TcCLB.511165.109 | hypothetical protein, conserved                            | 2,423 | 2,839E-18  |
| TcCLB.472357.10  | trans-sialidase, Group V, putative                         | 2,415 | 1,442E-22  |
| TcCLB.511759.40  | hypothetical protein, conserved                            | 2,412 | 6,812E-17  |
| TcCLB.402375.10  | retrotransposon hot spot protein (RHS, pseudogene), putat  | 2,411 | 6,333E-88  |
| TcCLB.506779.80  | pantothenate kinase subunit, putative                      | 2,408 | 3,446E-100 |
| TcCLB.463279.20  | trans-sialidase, Group II, putative                        | 2,408 | 8,884E-45  |
| TcCLB.407477.50  | cytochrome c oxidase VIII (COX VIII), putative             | 2,407 | 2,649E-119 |
| TcCLB.506263.10  | D-isomer specific 2-hydroxyacid dehydrogenase-protein, pu  | 2,404 | 5,972E-183 |
| TcCLB.509961.9   | cytochrome c oxidase subunit 10, putative                  | 2,403 | 5,233E-67  |
| TcCLB.510343.15  | protein kinase, putative                                   | 2,402 | 3,367E-10  |
| TcCLB.511329.10  | Calpain-like protein 2 (CALP2)                             | 2,4   | 6,447E-72  |
| TcCLB.503959.78  | hypothetical protein, conserved                            | 2,395 | 1,625E-71  |
| TcCLB.510699.50  | mucin TcMUCII, putative                                    | 2,395 | 5,219E-12  |
| TcCLB.468803.10  | surface protease GP63, putative                            | 2,392 | 0,0001478  |
| TcCLB.510407.30  | hypothetical protein, conserved                            | 2,391 | 4,351E-43  |

|                  |                                                           |       |            |
|------------------|-----------------------------------------------------------|-------|------------|
| TcCLB.507617.9   | prostaglandin F2alpha synthase (TcPGFS)                   | 2,386 | 6,616E-198 |
| TcCLB.505057.20  | hypothetical protein                                      | 2,386 | 1,862E-36  |
| TcCLB.507951.299 | 5-histidylcysteine sulfoxide synthase                     | 2,385 | 1,022E-114 |
| TcCLB.426799.9   | hypothetical protein, conserved (fragment)                | 2,385 | 1,267E-10  |
| TcCLB.508999.200 | cysteine peptidase, Clan CA, family C2, putative          | 2,382 | 1,827E-85  |
| TcCLB.508551.30  | hexose transporter, putative                              | 2,382 | 7,074E-73  |
| TcCLB.509739.10  | trans-sialidase, Group II, putative                       | 2,382 | 3,499E-30  |
| TcCLB.416605.20  | mucin TcMUCII (pseudogene), putative                      | 2,375 | 0,00001375 |
| TcCLB.508823.70  | P27 protein, putative (P27)                               | 2,374 | 2,559E-226 |
| TcCLB.510581.20  | receptor-type adenylate cyclase, putative                 | 2,372 | 6,333E-26  |
| TcCLB.506529.360 | cytochrome oxidase subunit IV, putative (COXIV)           | 2,369 | 2,228E-172 |
| TcCLB.510359.570 | mucin-associated surface protein (MASP), putative         | 2,368 | 1,854E-28  |
| TcCLB.511907.89  | hypothetical protein, conserved                           | 2,368 | 8,036E-19  |
| TcCLB.511335.9   | calpain-like cysteine peptidase, putative (fragment)      | 2,367 | 3,945E-11  |
| TcCLB.507125.30  | retrotransposon hot spot protein (RHS, pseudogene), putat | 2,366 | 6,119E-08  |
| TcCLB.508621.10  | protein kinase, putative                                  | 2,363 | 2,03E-56   |
| TcCLB.509937.200 | hypothetical protein, conserved                           | 2,363 | 4,424E-46  |
| TcCLB.507149.20  | retrotransposon hot spot protein (RHS, pseudogene), putat | 2,361 | 9,815E-07  |
| TcCLB.511151.80  | hypothetical protein, conserved                           | 2,36  | 3,877E-68  |
| TcCLB.511255.604 | mucin TcMUCII, putative                                   | 2,358 | 0,0006141  |
| TcCLB.510623.39  | mucin-associated surface protein (MASP, pseudogene), pu   | 2,358 | 0,05597    |
| TcCLB.508207.70  | Adenine phosphoribosyltransferase, putative               | 2,357 | 1,027E-51  |
| TcCLB.511075.9   | fatty acid desaturase, putative (fragment)                | 2,354 | 6,439E-63  |
| TcCLB.507515.90  | hypothetical protein, conserved                           | 2,354 | 5,495E-55  |
| TcCLB.508023.100 | trans-sialidase, Group IV, putative                       | 2,354 | 2,092E-09  |
| TcCLB.506731.10  | hypothetical protein                                      | 2,35  | 6,924E-13  |
| TcCLB.510339.80  | hypothetical protein, conserved                           | 2,349 | 1,961E-143 |
| TcCLB.511575.30  | hypothetical protein, conserved                           | 2,344 | 1,415E-45  |
| TcCLB.511671.80  | serine/threonine kinase, putative                         | 2,342 | 1,365E-34  |
| TcCLB.508669.10  | hypothetical protein, conserved                           | 2,338 | 1,522E-57  |
| TcCLB.511053.10  | hypothetical protein, conserved                           | 2,338 | 5,306E-31  |
| TcCLB.510659.240 | lactoylglutathione lyase-like protein, putative           | 2,336 | 8,819E-59  |
| TcCLB.506717.130 | trans-sialidase (pseudogene), putative                    | 2,335 | 3,812E-34  |
| TcCLB.506211.140 | hypothetical protein, conserved                           | 2,334 | 2,289E-107 |
| TcCLB.511389.110 | cytochrome c oxidase VIII (COX VIII), putative            | 2,333 | 1,316E-122 |
| TcCLB.508193.60  | UDP-Gal or UDP-GlcNAc-dependent glycosyltransferase, pu   | 2,333 | 6,527E-23  |
| TcCLB.508493.110 | mucin-associated surface protein (MASP), putative         | 2,331 | 3,998E-11  |
| TcCLB.511817.20  | hypothetical protein, conserved                           | 2,33  | 4,144E-73  |
| TcCLB.507561.10  | trans-sialidase, putative                                 | 2,33  | 0,01825    |
| TcCLB.504131.90  | hypothetical protein, conserved                           | 2,327 | 6,211E-69  |
| TcCLB.509461.10  | actin interacting protein-like protein, putative          | 2,327 | 7,824E-56  |
| TcCLB.504197.5   | mucin-associated surface protein (MASP), putative (fragm  | 2,327 | 0,1053     |
| TcCLB.401183.10  | trans-sialidase, putative (fragment)                      | 2,325 | 9,797E-09  |
| TcCLB.510791.50  | mucin TcMUCII, putative                                   | 2,325 | 0,0000185  |
| TcCLB.507085.150 | mucin-associated surface protein (MASP), putative         | 2,324 | 9,267E-15  |

|                  |                                                           |       |            |
|------------------|-----------------------------------------------------------|-------|------------|
| TcCLB.511127.80  | hypothetical protein, conserved                           | 2,323 | 3,962E-47  |
| TcCLB.511039.30  | hypothetical protein, conserved                           | 2,322 | 9,614E-39  |
| TcCLB.508677.134 | hypothetical protein, conserved                           | 2,321 | 4,105E-39  |
| TcCLB.507869.10  | NADH-ubiquinone oxidoreductase, mitochondrial, putative   | 2,318 | 6,72E-77   |
| TcCLB.508849.11  | trans-sialidase, putative (fragment)                      | 2,318 | 0,005908   |
| TcCLB.508741.229 | Mitochondrial outer membrane protein porin, putative (VD) | 2,314 | 2,52E-144  |
| TcCLB.509747.80  | hypothetical protein, conserved                           | 2,314 | 1,759E-25  |
| TcCLB.511613.180 | mucin-associated surface protein (MASP), putative         | 2,313 | 0,00004936 |
| TcCLB.509059.50  | pyridoxal kinase, putative                                | 2,311 | 3,675E-79  |
| TcCLB.504069.120 | amino acid permease 24, putative (AAP24)                  | 2,308 | 1,053E-43  |
| TcCLB.510747.10  | hypothetical protein, conserved                           | 2,307 | 6,61E-31   |
| TcCLB.424195.5   | hypothetical protein, conserved                           | 2,307 | 0,002473   |
| TcCLB.506459.219 | mucin TcMUCII, putative                                   | 2,303 | 0,00002699 |
| TcCLB.508195.10  | UDP-Gal or UDP-GlcNAc-dependent glycosyltransferase, pu   | 2,3   | 2,75E-22   |
| TcCLB.506759.140 | 90 kDa surface protein, putative                          | 2,3   | 0,05631    |
| TcCLB.509003.60  | hypothetical protein, conserved                           | 2,298 | 1,927E-52  |
| TcCLB.505945.20  | ribonuclease mar1, putative                               | 2,297 | 5,107E-57  |
| TcCLB.503943.20  | hypothetical protein, conserved                           | 2,294 | 1,383E-113 |
| TcCLB.510103.30  | protein associated with differentiation 4, putative       | 2,292 | 3,27E-88   |
| TcCLB.503501.14  | mucin TcMUCII, putative                                   | 2,289 | 0,005912   |
| TcCLB.510005.20  | trans-sialidase, Group II, putative                       | 2,288 | 4,079E-20  |
| TcCLB.508761.80  | mucin TcMUCII, putative                                   | 2,288 | 0,001924   |
| TcCLB.510155.160 | protein kinase, putative                                  | 2,286 | 2,059E-90  |
| TcCLB.510305.70  | hypothetical protein, conserved                           | 2,286 | 5,809E-39  |
| TcCLB.508141.90  | hypothetical protein, conserved                           | 2,283 | 1,093E-39  |
| TcCLB.509753.90  | trans-sialidase (pseudogene), putative                    | 2,283 | 8,761E-17  |
| TcCLB.508737.70  | cytochrome b5-dependent oleate desaturase                 | 2,28  | 2,7E-107   |
| TcCLB.511301.90  | protein kinase, putative                                  | 2,28  | 6,406E-51  |
| TcCLB.504557.20  | UDP-Gal or UDP-GlcNAc-dependent glycosyltransferase, pu   | 2,28  | 9,274E-22  |
| TcCLB.507723.100 | cytochrome oxidase subunit IX, putative (COXIX)           | 2,276 | 3,158E-80  |
| TcCLB.509463.20  | hypothetical protein, conserved                           | 2,276 | 1,245E-43  |
| TcCLB.507317.34  | hypothetical protein, conserved                           | 2,272 | 1,01E-40   |
| TcCLB.507889.20  | hypothetical protein, conserved                           | 2,269 | 3,628E-21  |
| TcCLB.504587.40  | mucin TcMUCII, putative                                   | 2,267 | 0,00004719 |
| TcCLB.504867.70  | cytochrome c oxidase assembly protein, putative           | 2,265 | 1,877E-63  |
| TcCLB.510725.40  | hypothetical protein, conserved                           | 2,265 | 9,064E-58  |
| TcCLB.505945.90  | folate/pteridine transporter, putative                    | 2,264 | 7,66E-92   |
| TcCLB.506563.210 | cysteine peptidase, Clan CA, family C2, putative          | 2,259 | 3,296E-157 |
| TcCLB.506405.43  | hypothetical protein, conserved                           | 2,259 | 2,296E-25  |
| TcCLB.506797.110 | hypothetical protein, conserved                           | 2,259 | 7,105E-20  |
| TcCLB.508799.150 | nucleoside transporter-like, putative                     | 2,258 | 2,717E-67  |
| TcCLB.506801.30  | hypothetical protein                                      | 2,257 | 4,145E-15  |
| TcCLB.506879.40  | mucin-associated surface protein (MASP, pseudogene), pu   | 2,256 | 0,0001499  |
| TcCLB.508055.40  | surface protease GP63 (pseudogene), putative              | 2,254 | 0,06875    |
| TcCLB.509895.30  | hypothetical protein, conserved                           | 2,253 | 7,358E-146 |



|                  |                                                            |       |            |
|------------------|------------------------------------------------------------|-------|------------|
| TcCLB.511807.130 | hypothetical protein, conserved                            | 2,253 | 3,561E-08  |
| TcCLB.507233.110 | mismatch repair protein MSH4, putative                     | 2,248 | 1,368E-87  |
| TcCLB.508495.80  | mucin-associated surface protein (MASP, pseudogene), pu    | 2,248 | 0,02624    |
| TcCLB.511859.150 | mucin-like glycoprotein, putative                          | 2,247 | 1,257E-30  |
| TcCLB.508985.21  | mucin TcMUCII, putative (fragment)                         | 2,247 | 0,1324     |
| TcCLB.510507.40  | transmembrane amino acid transporter, putative             | 2,246 | 1,832E-46  |
| TcCLB.511325.50  | amino acid permease, putative                              | 2,245 | 4,384E-19  |
| TcCLB.504669.50  | mucin TcMUCl, putative                                     | 2,244 | 1,241E-07  |
| TcCLB.508231.9   | hexose transporter, putative                               | 2,243 | 9,965E-55  |
| TcCLB.508737.10  | surface antigen TASV-C2, putative (TASV-C2)                | 2,242 | 8,197E-56  |
| TcCLB.507143.80  | hypothetical protein, conserved                            | 2,242 | 2,106E-29  |
| TcCLB.509197.20  | cation transporter, putative                               | 2,241 | 1,637E-06  |
| TcCLB.509669.30  | ABC transporter, putative                                  | 2,24  | 6,136E-46  |
| TcCLB.510785.10  | hypothetical protein                                       | 2,24  | 2,151E-38  |
| TcCLB.510561.30  | mucin-associated surface protein (MASP), putative          | 2,239 | 0,1242     |
| TcCLB.511859.130 | mucin-like glycoprotein, putative                          | 2,237 | 2,669E-27  |
| TcCLB.503501.7   | mucin-associated surface protein (MASP), putative (fragm   | 2,236 | 0,1228     |
| TcCLB.510661.250 | cystathione gamma lyase, putative                          | 2,234 | 5,303E-147 |
| TcCLB.503879.110 | hypothetical protein, conserved                            | 2,233 | 9,845E-73  |
| TcCLB.509333.10  | trans-sialidase, Group III, putative                       | 2,232 | 1,441E-64  |
| TcCLB.511657.40  | hypothetical protein, conserved                            | 2,232 | 1,605E-40  |
| TcCLB.507479.29  | retrotransposon hot spot protein (RHS, pseudogene), putat  | 2,229 | 1,705E-16  |
| TcCLB.509267.30  | hypothetical protein, conserved                            | 2,228 | 5,833E-24  |
| TcCLB.505683.10  | sterol 24-c-methyltransferase, putative                    | 2,225 | 4,488E-78  |
| TcCLB.506753.150 | hypothetical protein, conserved                            | 2,225 | 2,57E-22   |
| TcCLB.510669.5   | ribulose-phosphate 3-epimerase, putative (fragment)        | 2,225 | 0,00002284 |
| TcCLB.510843.10  | beta galactofuranosyl glycosyltransferase (pseudogene), pi | 2,224 | 1,21E-41   |
| TcCLB.509329.31  | trans-sialidase, putative                                  | 2,224 | 0,008186   |
| TcCLB.510863.9   | hypothetical protein                                       | 2,222 | 5,115E-12  |
| TcCLB.507641.64  | hypothetical protein, conserved                            | 2,221 | 1,917E-84  |
| TcCLB.506853.50  | 2-oxoisovalerate dehydrogenase alpha subunit, putative     | 2,221 | 7,69E-76   |
| TcCLB.503791.30  | hypothetical protein, conserved                            | 2,22  | 2,735E-119 |
| TcCLB.506735.30  | hypothetical protein, conserved                            | 2,22  | 1,469E-45  |
| TcCLB.506123.70  | hypothetical protein, conserved                            | 2,218 | 3,665E-12  |
| TcCLB.508119.70  | mucin TcMUCII, putative                                    | 2,218 | 1,717E-11  |
| TcCLB.509441.10  | hypothetical protein, conserved                            | 2,215 | 4,005E-55  |
| TcCLB.474079.10  | trans-sialidase, putative                                  | 2,213 | 9,804E-26  |
| TcCLB.507969.40  | hypothetical protein, conserved                            | 2,209 | 9,058E-31  |
| TcCLB.506529.550 | cysteine peptidase, putative                               | 2,208 | 8,474E-61  |
| TcCLB.509053.30  | hypothetical protein, conserved                            | 2,207 | 3,297E-106 |
| TcCLB.509257.10  | trans-sialidase, Group II, putative                        | 2,206 | 2,221E-56  |
| TcCLB.410241.10  | retrotransposon hot spot protein (RHS, pseudogene), putat  | 2,204 | 0,004482   |
| TcCLB.511099.160 | mucin TcMUCII, putative                                    | 2,197 | 0,0003316  |
| TcCLB.508821.40  | hypothetical protein, conserved                            | 2,196 | 7,234E-106 |
| TcCLB.507211.20  | protein kinase, putative                                   | 2,195 | 3,845E-07  |

|                  |                                                           |       |            |
|------------------|-----------------------------------------------------------|-------|------------|
| TcCLB.506203.60  | hypothetical protein, conserved                           | 2,189 | 2,742E-53  |
| TcCLB.504163.60  | hypothetical protein, conserved                           | 2,189 | 2,107E-35  |
| TcCLB.511591.10  | mucin-associated surface protein (MASP), putative         | 2,189 | 0,03014    |
| TcCLB.504033.80  | hypothetical protein, conserved                           | 2,188 | 7,823E-118 |
| TcCLB.509207.90  | pyrroline-5-carboxylate reductase, putative (P5CR)        | 2,183 | 3,866E-94  |
| TcCLB.507219.20  | retrotransposon hot spot protein (RHS, pseudogene), putat | 2,183 | 4,667E-76  |
| TcCLB.506931.10  | haloacid dehalogenase-like hydrolase, putative            | 2,183 | 1,007E-38  |
| TcCLB.507491.39  | hypothetical protein, conserved                           | 2,183 | 2,16E-21   |
| TcCLB.510329.150 | hypothetical protein, conserved                           | 2,181 | 1,273E-74  |
| TcCLB.511361.10  | kinesin-like protein (pseudogene), putative               | 2,181 | 3,606E-41  |
| TcCLB.509859.10  | hypothetical protein, conserved                           | 2,177 | 1,399E-98  |
| TcCLB.511037.20  | L-2-hydroxyglutarate dehydrogenase, mitochondrial, putati | 2,177 | 3,621E-59  |
| TcCLB.509853.10  | mannosyl-oligosaccharide 1,2-alpha-mannosidase IB, puta   | 2,177 | 1,184E-51  |
| TcCLB.506179.5   | ferric reductase transmembrane protein, putative (fragme  | 2,177 | 0,0004931  |
| TcCLB.507773.10  | trans-sialidase, Group IV, putative                       | 2,173 | 2,109E-24  |
| TcCLB.507523.75  | mucin TcMUCII (pseudogene), putative                      | 2,172 | 0,0001958  |
| TcCLB.509109.14  | hypothetical protein, conserved (fragment)                | 2,171 | 1,014E-25  |
| TcCLB.507771.70  | hypothetical protein, conserved                           | 2,163 | 2,399E-79  |
| TcCLB.510565.30  | cytochrome c oxidase subunit V, putative                  | 2,161 | 5,077E-127 |
| TcCLB.511693.110 | hypothetical protein, conserved                           | 2,159 | 4,081E-36  |
| TcCLB.509329.9   | retrotransposon hot spot (RHS) protein, putative          | 2,158 | 5,7E-22    |
| TcCLB.503731.9   | hypothetical protein (fragment)                           | 2,157 | 0,00001068 |
| TcCLB.505621.10  | mucin-associated surface protein (MASP, pseudogene), pu   | 2,154 | 1,564E-25  |
| TcCLB.510591.30  | retrotransposon hot spot protein (RHS, pseudogene), putat | 2,152 | 9,441E-09  |
| TcCLB.511661.80  | hypothetical protein, conserved                           | 2,151 | 3,846E-31  |
| TcCLB.508211.60  | hypothetical protein, conserved                           | 2,149 | 1,469E-51  |
| TcCLB.504153.30  | hypothetical protein, conserved                           | 2,147 | 8,042E-51  |
| TcCLB.511613.120 | mucin TcMUCII, putative                                   | 2,146 | 0,00629    |
| TcCLB.507611.280 | cytochrome oxidase subunit IX, putative (COXIX)           | 2,145 | 5,514E-78  |
| TcCLB.508465.40  | hypothetical protein, conserved                           | 2,143 | 1,035E-51  |
| TcCLB.508121.120 | mucin TcMUCII, putative                                   | 2,143 | 0,0004603  |
| TcCLB.509799.140 | L-2-hydroxyglutarate dehydrogenase, mitochondrial, putati | 2,142 | 8,535E-56  |
| TcCLB.508873.430 | trans-sialidase (pseudogene), putative                    | 2,142 | 2,884E-18  |
| TcCLB.509109.160 | hypothetical protein, conserved                           | 2,141 | 2,785E-15  |
| TcCLB.466593.10  | hypothetical protein, conserved                           | 2,14  | 1,646E-23  |
| TcCLB.503461.20  | per-hexamer repeat protein 5, putative                    | 2,139 | 7,173E-34  |
| TcCLB.508163.310 | mucin TcMUCII, putative                                   | 2,138 | 2,293E-08  |
| TcCLB.507719.9   | dispersed gene family protein 1 (DGF-1), putative         | 2,137 | 5,785E-52  |
| TcCLB.504143.10  | hypothetical protein, conserved                           | 2,136 | 1,103E-26  |
| TcCLB.506543.40  | hypothetical protein, conserved                           | 2,134 | 6,267E-22  |
| TcCLB.509429.329 | cruzipain precursor, putative (fragment)                  | 2,133 | 1,469E-213 |
| TcCLB.511151.90  | glycerol-3-phosphate dehydrogenase, putative              | 2,133 | 3,448E-132 |
| TcCLB.506417.5   | endoribonuclease L-PSP (pb5), putative                    | 2,133 | 4,72E-63   |
| TcCLB.508701.20  | cation transporter, putative                              | 2,133 | 5,021E-06  |
| TcCLB.507129.5   | hypothetical protein, conserved (fragment)                | 2,131 | 4,324E-09  |

|                  |                                                               |       |            |
|------------------|---------------------------------------------------------------|-------|------------|
| TcCLB.504081.500 | mucin TcMUCII, putative                                       | 2,131 | 0,01658    |
| TcCLB.506243.10  | retrotransposon hot spot protein (RHS, pseudogene), putative  | 2,129 | 3,22E-55   |
| TcCLB.509429.280 | hypothetical protein                                          | 2,127 | 1,113E-50  |
| TcCLB.508173.140 | hypothetical protein                                          | 2,126 | 6,448E-53  |
| TcCLB.507669.220 | hypothetical protein, conserved                               | 2,124 | 1,602E-57  |
| TcCLB.510245.10  | amino acid permease, putative                                 | 2,122 | 5,177E-86  |
| TcCLB.508495.150 | mucin-associated surface protein (MASP, pseudogene), putative | 2,122 | 0,00000488 |
| TcCLB.506001.30  | hypothetical protein                                          | 2,119 | 0,01619    |
| TcCLB.510101.50  | lanosterol 14-alpha-demethylase, putative                     | 2,117 | 1,118E-189 |
| TcCLB.508737.210 | Mitochondrial outer membrane protein porin, putative (VD)     | 2,117 | 4,214E-102 |
| TcCLB.510581.9   | receptor-type adenylate cyclase, putative (fragment)          | 2,117 | 5,29E-27   |
| TcCLB.511439.30  | lipase, putative                                              | 2,117 | 5,588E-16  |
| TcCLB.508257.220 | expression site-associated gene (ESAG-like) protein, putative | 2,116 | 1,459E-68  |
| TcCLB.510033.14  | mucin-associated surface protein (MASP, pseudogene), putative | 2,112 | 4,931E-27  |
| TcCLB.509001.30  | hypothetical protein, conserved                               | 2,109 | 2,933E-29  |
| TcCLB.482369.29  | arginine kinase (fragment)                                    | 2,109 | 8,8E-18    |
| TcCLB.508241.20  | hypothetical protein, conserved                               | 2,108 | 3,936E-69  |
| TcCLB.510945.70  | aspartate aminotransferase, mitochondrial, putative           | 2,107 | 3,823E-56  |
| TcCLB.426897.10  | hypothetical protein                                          | 2,105 | 2,372E-40  |
| TcCLB.506679.270 | hypothetical protein, conserved                               | 2,102 | 9,456E-51  |
| TcCLB.510357.40  | hypothetical protein, conserved                               | 2,101 | 5,841E-24  |
| TcCLB.509437.160 | trans-sialidase, Group IV, putative                           | 2,099 | 5,64E-25   |
| TcCLB.508555.50  | calpain-like cysteine peptidase, putative                     | 2,097 | 2,403E-36  |
| TcCLB.509105.70  | thiol-dependent reductase 1, putative (TcAc2)                 | 2,095 | 2,147E-108 |
| TcCLB.508267.50  | hypothetical protein, conserved                               | 2,09  | 2,863E-39  |
| TcCLB.504069.20  | cytochrome c oxidase subunit VI, putative                     | 2,089 | 1,82E-64   |
| TcCLB.510093.10  | ATPase, putative                                              | 2,087 | 0,03825    |
| TcCLB.508267.30  | hypothetical protein, conserved                               | 2,085 | 3,796E-57  |
| TcCLB.506767.310 | trans-sialidase (pseudogene), putative                        | 2,085 | 7,061E-10  |
| TcCLB.511605.55  | hypothetical protein                                          | 2,083 | 0,001055   |
| TcCLB.511545.90  | hypothetical protein                                          | 2,081 | 1,497E-44  |
| TcCLB.508567.70  | peptidyl-prolyl cis-trans isomerase (PIN1)                    | 2,081 | 9,3E-38    |
| TcCLB.510609.50  | nuclear receptor binding factor, putative                     | 2,08  | 2,477E-34  |
| TcCLB.511775.21  | mitochondrial RNA editing ligase 1 (pseudogene), putative     | 2,079 | 0,158      |
| TcCLB.506635.60  | pyroglutamyl-peptidase I, putative (PPI)                      | 2,077 | 8,267E-47  |
| TcCLB.510943.50  | delta-1-pyrroline-5-carboxylate dehydrogenase, putative       | 2,076 | 7,668E-85  |
| TcCLB.511817.210 | protein kinase, putative                                      | 2,076 | 2,249E-29  |
| TcCLB.510483.210 | trans-sialidase (pseudogene), putative                        | 2,076 | 2,063E-22  |
| TcCLB.509239.10  | fatty acid desaturase, putative                               | 2,075 | 3,767E-92  |
| TcCLB.509365.20  | dispersed gene family protein 1 (DGF-1, pseudogene), putative | 2,073 | 1,656E-23  |
| TcCLB.510491.60  | trans-sialidase, Group IV, putative                           | 2,072 | 4,668E-37  |
| TcCLB.504801.20  | surface protease GP63, putative                               | 2,072 | 0,006731   |
| TcCLB.507359.20  | surface antigen TASV, putative                                | 2,072 | 0,01345    |
| TcCLB.505683.5   | hypothetical protein                                          | 2,071 | 9,178E-67  |
| TcCLB.509693.209 | mismatch repair protein, putative                             | 2,071 | 7,812E-33  |

|                  |                                                               |       |            |
|------------------|---------------------------------------------------------------|-------|------------|
| TcCLB.511361.20  | hypothetical protein, conserved                               | 2,071 | 6,965E-10  |
| TcCLB.506297.230 | hypothetical protein, conserved                               | 2,07  | 1,199E-31  |
| TcCLB.506965.90  | mucin TcMUCII, putative                                       | 2,069 | 0,0002161  |
| TcCLB.510185.10  | sterol 24-c-methyltransferase, putative                       | 2,065 | 7,307E-69  |
| TcCLB.510673.10  | dispersed gene family protein 1 (DGF-1, pseudogene), putative | 2,063 | 5,349E-27  |
| TcCLB.506893.100 | UMP-CMP kinase, mitochondrial, putative                       | 2,062 | 1,587E-37  |
| TcCLB.507393.9   | dispersed gene family protein 1 (DGF-1), putative             | 2,061 | 5,066E-32  |
| TcCLB.503975.50  | hypothetical protein, conserved                               | 2,06  | 1,02E-83   |
| TcCLB.508739.21  | mucin TcSMUGS (pseudogene), putative                          | 2,06  | 5,087E-37  |
| TcCLB.504393.10  | hypothetical protein                                          | 2,06  | 0,002387   |
| TcCLB.508823.10  | hypothetical protein, conserved                               | 2,059 | 1,476E-52  |
| TcCLB.508201.40  | mucin TcMUCII, putative                                       | 2,059 | 7,99E-10   |
| TcCLB.507631.20  | hypothetical protein, conserved                               | 2,057 | 1,668E-26  |
| TcCLB.510829.10  | hypothetical protein, conserved                               | 2,053 | 1,354E-39  |
| TcCLB.508781.110 | 2-oxoisovalerate dehydrogenase alpha subunit, putative        | 2,048 | 8,714E-51  |
| TcCLB.511393.10  | nonspecific lipid-transfer protein, putative                  | 2,048 | 1,503E-31  |
| TcCLB.508677.160 | hypothetical protein, conserved                               | 2,046 | 1,597E-38  |
| TcCLB.503943.10  | serine/threonine protein kinase, putative (fragment)          | 2,045 | 8,852E-61  |
| TcCLB.510445.10  | casein kinase 1 isoform 2, putative                           | 2,044 | 4,98E-17   |
| TcCLB.507275.40  | hypothetical protein, conserved                               | 2,043 | 2,848E-18  |
| TcCLB.507429.10  | mucin TcMUCII (pseudogene), putative                          | 2,043 | 0,00007385 |
| TcCLB.511809.30  | hypothetical protein, conserved                               | 2,041 | 1,764E-53  |
| TcCLB.509449.10  | receptor-type adenylate cyclase, putative                     | 2,041 | 6,654E-24  |
| TcCLB.445783.10  | mucin-associated surface protein (MASP, pseudogene), putative | 2,041 | 0,001427   |
| TcCLB.507443.30  | UDP-Gal or UDP-GlcNAc-dependent glycosyltransferase, putative | 2,04  | 3,349E-09  |
| TcCLB.505945.60  | hypothetical protein, conserved                               | 2,039 | 2,177E-46  |
| TcCLB.511237.30  | proline oxidase (pseudogene), putative                        | 2,038 | 1,417E-48  |
| TcCLB.509327.10  | retrotransposon hot spot protein (RHS, pseudogene), putative  | 2,038 | 5,805E-26  |
| TcCLB.506821.210 | cytochrome-b5 reductase, putative                             | 2,037 | 1,218E-63  |
| TcCLB.511843.10  | mucin-associated surface protein (MASP), putative             | 2,037 | 0,00001027 |
| TcCLB.509397.9   | dispersed gene family protein 1 (DGF-1), putative (fragment)  | 2,036 | 9,873E-13  |
| TcCLB.511839.10  | mucin TcMUCII, putative                                       | 2,036 | 0,001949   |
| TcCLB.508569.10  | hypothetical protein, conserved                               | 2,032 | 0,00002306 |
| TcCLB.506537.80  | trans-sialidase, Group II, putative                           | 2,031 | 5,064E-07  |
| TcCLB.510889.50  | cytochrome oxidase subunit IV, putative (COXIV)               | 2,03  | 1,006E-89  |
| TcCLB.507483.39  | calmodulin (CALA2)                                            | 2,03  | 6,005E-07  |
| TcCLB.511333.10  | calpain-like cysteine peptidase, putative                     | 2,024 | 2,203E-09  |
| TcCLB.506819.30  | superoxide dismutase, putative                                | 2,019 | 2,113E-38  |
| TcCLB.506693.20  | hypothetical protein, conserved                               | 2,019 | 2,364E-29  |
| TcCLB.511117.30  | trans-sialidase, Group II, putative                           | 2,018 | 1,485E-06  |
| TcCLB.507645.50  | hypothetical protein, conserved                               | 2,013 | 5,082E-30  |
| TcCLB.507967.20  | hypothetical protein, conserved                               | 2,012 | 5,806E-28  |
| TcCLB.503779.20  | hypothetical protein, conserved                               | 2,011 | 3,087E-42  |
| TcCLB.510039.80  | hypothetical protein, conserved                               | 2,011 | 1,131E-35  |
| TcCLB.509217.30  | retrotransposon hot spot protein (RHS, pseudogene), putative  | 2,01  | 1,725E-06  |

|                  |                                                               |       |            |
|------------------|---------------------------------------------------------------|-------|------------|
| TcCLB.507357.130 | mucin TcMUCII, putative                                       | 2,01  | 0,005202   |
| TcCLB.511895.20  | hypothetical protein                                          | 2,008 | 2,394E-37  |
| TcCLB.510233.39  | trans-sialidase, putative (fragment)                          | 2,007 | 0,04311    |
| TcCLB.508013.60  | hypothetical protein                                          | 2,005 | 0,00535    |
| TcCLB.508747.40  | mucin TcMUCII, putative                                       | 2,004 | 7,283E-11  |
| TcCLB.506799.40  | hypothetical protein                                          | 2,004 | 1,048E-10  |
| TcCLB.506717.140 | retrotransposon hot spot protein (RHS, pseudogene), putative  | 2,003 | 0,00000144 |
| TcCLB.509141.40  | Mitochondrial outer membrane protein porin, putative (VD)     | 2,002 | 2,972E-51  |
| TcCLB.509205.60  | hypothetical protein, conserved                               | 2,001 | 1,867E-62  |
| TcCLB.426435.9   | fatty acid desaturase, putative                               | 2     | 6,427E-76  |
| TcCLB.506377.10  | trans-sialidase, putative                                     | 2     | 1,653E-35  |
| TcCLB.508589.5   | trans-sialidase, putative (fragment)                          | 1,999 | 0,0003509  |
| TcCLB.510677.9   | dispersed gene family protein 1 (DGF-1), putative (fragment)  | 1,995 | 3,122E-32  |
| TcCLB.430539.10  | hypothetical protein, conserved (fragment)                    | 1,993 | 8,636E-08  |
| TcCLB.510139.10  | mucin-associated surface protein (MASP, pseudogene), putative | 1,992 | 8,846E-07  |
| TcCLB.508297.50  | short chain dehydrogenase, putative                           | 1,991 | 3,322E-34  |
| TcCLB.506683.110 | trans-sialidase, Group VIII, putative                         | 1,989 | 1,758E-30  |
| TcCLB.506417.10  | multidrug resistance protein A (pseudogene), putative         | 1,988 | 6,739E-190 |
| TcCLB.506475.100 | conserved protein, unknown function                           | 1,987 | 3,602E-31  |
| TcCLB.507625.60  | dispersed gene family protein 1 (DGF-1, pseudogene), putative | 1,987 | 2,231E-27  |
| TcCLB.511817.60  | hypothetical protein, conserved                               | 1,987 | 4,652E-23  |
| TcCLB.509197.10  | cation transporter, putative                                  | 1,987 | 0,00001192 |
| TcCLB.509453.79  | hypothetical protein, conserved                               | 1,984 | 4,099E-74  |
| TcCLB.506743.135 | trans-sialidase (pseudogene), putative                        | 1,984 | 1,282E-08  |
| TcCLB.509217.90  | mucin-associated surface protein (MASP), putative             | 1,979 | 0,0003101  |
| TcCLB.511627.130 | hypothetical protein, conserved                               | 1,978 | 1,121E-48  |
| TcCLB.508023.40  | retrotransposon hot spot (RHS) protein, putative              | 1,978 | 4,751E-25  |
| TcCLB.509265.10  | retrotransposon hot spot (RHS) protein, putative              | 1,976 | 9,804E-50  |
| TcCLB.510843.19  | trans-sialidase, putative (fragment)                          | 1,974 | 6,71E-09   |
| TcCLB.508025.10  | retrotransposon hot spot (RHS) protein, putative (fragment)   | 1,973 | 2,139E-08  |
| TcCLB.510191.20  | mucin TcMUCII, putative                                       | 1,971 | 0,02365    |
| TcCLB.398477.10  | trans-sialidase, Group II, putative                           | 1,97  | 0,0001414  |
| TcCLB.511687.10  | Mitochondrial outer membrane protein porin, putative (VD)     | 1,969 | 4,737E-54  |
| TcCLB.509331.70  | 3-oxo-5-alpha-steroid 4-dehydrogenase, putative               | 1,968 | 7,477E-43  |
| TcCLB.506199.20  | hypothetical protein, conserved                               | 1,968 | 1,998E-18  |
| TcCLB.511383.80  | hypothetical protein, conserved                               | 1,967 | 7,378E-20  |
| TcCLB.511255.700 | trans-sialidase, Group V, putative                            | 1,966 | 0,00000268 |
| TcCLB.509281.20  | trans-sialidase, Group II, putative                           | 1,965 | 0,00009676 |
| TcCLB.510659.20  | hypothetical protein, conserved                               | 1,964 | 2,386E-35  |
| TcCLB.508501.70  | mucin TcMUCII, putative                                       | 1,964 | 1,503E-07  |
| TcCLB.509667.10  | dispersed gene family protein 1 (DGF-1), putative             | 1,962 | 5,368E-18  |
| TcCLB.510039.30  | mucin-associated surface protein (MASP), putative             | 1,961 | 9,536E-11  |
| TcCLB.507559.80  | deoxyribose-phosphate aldolase, putative                      | 1,959 | 2,28E-90   |
| TcCLB.503887.40  | hypothetical protein, conserved                               | 1,959 | 1,675E-76  |
| TcCLB.508387.20  | methylthioadenosine phosphorylase, putative                   | 1,958 | 4,214E-53  |

|                  |                                                           |       |            |
|------------------|-----------------------------------------------------------|-------|------------|
| TcCLB.503393.10  | amino acid permease, putative (fragment)                  | 1,958 | 1,807E-13  |
| TcCLB.510165.70  | retrotransposon hot spot protein (RHS, pseudogene), putat | 1,958 | 1,072E-07  |
| TcCLB.508495.50  | mucin TcMUCII, putative                                   | 1,957 | 2,307E-09  |
| TcCLB.511573.30  | hypothetical protein, conserved                           | 1,949 | 8,238E-27  |
| TcCLB.508109.30  | mucin-associated surface protein (MASP), putative         | 1,949 | 0,02538    |
| TcCLB.510669.49  | Gim5A protein, putative                                   | 1,948 | 6,619E-58  |
| TcCLB.508677.60  | hypothetical protein                                      | 1,948 | 5,082E-09  |
| TcCLB.506615.100 | mucin-associated surface protein (MASP), putative         | 1,947 | 8,842E-15  |
| TcCLB.511693.10  | hypothetical protein                                      | 1,946 | 1,214E-83  |
| TcCLB.508799.230 | hypothetical protein, conserved                           | 1,946 | 1,442E-44  |
| TcCLB.508811.40  | hypothetical protein                                      | 1,945 | 3,168E-40  |
| TcCLB.508571.10  | hypothetical protein                                      | 1,945 | 9,846E-16  |
| TcCLB.503975.70  | hypothetical protein, conserved                           | 1,941 | 5,106E-53  |
| TcCLB.503577.9   | delta-1-pyrroline-5-carboxylate dehydrogenase (pseudoger  | 1,941 | 8,064E-30  |
| TcCLB.508971.40  | acetylornithine deacetylase-like, putative                | 1,94  | 6,246E-114 |
| TcCLB.509493.20  | mucin TcMUCII, putative                                   | 1,94  | 3,369E-06  |
| TcCLB.508557.29  | hypothetical protein, conserved                           | 1,937 | 2,984E-62  |
| TcCLB.506145.70  | hypothetical protein, conserved                           | 1,936 | 7,293E-26  |
| TcCLB.511821.20  | hypothetical protein, conserved                           | 1,936 | 6,48E-23   |
| TcCLB.508153.700 | hypothetical protein, conserved                           | 1,935 | 6,962E-29  |
| TcCLB.506417.83  | multidrug resistance-associated protein (pseudogene), put | 1,934 | 2,86E-34   |
| TcCLB.509493.80  | mucin TcMUCII, putative                                   | 1,934 | 6,536E-12  |
| TcCLB.507709.90  | sterol C-24 reductase, putative                           | 1,933 | 9,532E-42  |
| TcCLB.509129.10  | Mitochondrial outer membrane protein porin, putative (VD  | 1,932 | 1,178E-90  |
| TcCLB.504205.20  | trans-sialidase (pseudogene), putative                    | 1,932 | 1,728E-07  |
| TcCLB.506999.60  | hypothetical protein, conserved                           | 1,929 | 9,464E-46  |
| TcCLB.508293.44  | mucin-associated surface protein (MASP, pseudogene), pu   | 1,928 | 0,06372    |
| TcCLB.503855.40  | calpain-like cysteine peptidase, putative                 | 1,927 | 3,462E-50  |
| TcCLB.503415.40  | hypothetical protein                                      | 1,927 | 6,22E-28   |
| TcCLB.507611.170 | trans-sialidase, Group II, putative                       | 1,926 | 0,0003882  |
| TcCLB.509601.5   | mannosyl-oligosaccharide 1,2-alpha-mannosidase IB, puta   | 1,925 | 3,454E-07  |
| TcCLB.508495.140 | mucin TcMUCII, putative                                   | 1,924 | 3,367E-06  |
| TcCLB.508257.70  | phosphomannomutase-like protein, putative                 | 1,922 | 1,048E-57  |
| TcCLB.503745.25  | hypothetical protein, conserved                           | 1,922 | 3,267E-18  |
| TcCLB.509331.160 | hypothetical protein, conserved                           | 1,921 | 5,544E-29  |
| TcCLB.504085.60  | CMP-sialic acid transporter, putative                     | 1,921 | 2,558E-28  |
| TcCLB.510331.10  | trans-sialidase, Group III, putative                      | 1,921 | 1,316E-18  |
| TcCLB.504423.10  | hypothetical protein, conserved                           | 1,92  | 2,764E-19  |
| TcCLB.416619.10  | trans-sialidase, putative (fragment)                      | 1,92  | 0,01842    |
| TcCLB.508023.80  | retrotransposon hot spot protein (RHS, pseudogene), putat | 1,919 | 1,215E-21  |
| TcCLB.511487.90  | trans-sialidase, Group V, putative                        | 1,919 | 0,00000212 |
| TcCLB.505037.30  | hypothetical protein, conserved                           | 1,918 | 1,067E-12  |
| TcCLB.507963.20  | arginase, putative                                        | 1,914 | 5,685E-47  |
| TcCLB.511815.100 | hypothetical protein, conserved                           | 1,913 | 7,639E-35  |
| TcCLB.507527.50  | cation transporter, putative                              | 1,913 | 0,0006014  |

|                  |                                                         |       |            |
|------------------|---------------------------------------------------------|-------|------------|
| TcCLB.506407.10  | lysosomal alpha-mannosidase precursor, putative         | 1,912 | 2,279E-70  |
| TcCLB.506759.190 | surface protease GP63 (pseudogene), putative            | 1,911 | 0,06014    |
| TcCLB.506825.10  | RNA-binding protein, putative                           | 1,91  | 0,006898   |
| TcCLB.509967.20  | mismatch repair protein MSH4, putative                  | 1,908 | 3,571E-40  |
| TcCLB.511817.134 | hypothetical protein, conserved                         | 1,908 | 2,693E-26  |
| TcCLB.508501.40  | mucin TcMUCII, putative                                 | 1,907 | 1,615E-10  |
| TcCLB.506529.430 | alanine aminotransferase, putative                      | 1,907 | 3,184E-07  |
| TcCLB.509699.150 | mucin TcMUCII, putative                                 | 1,906 | 0,06774    |
| TcCLB.510625.79  | mucin TcMUCII (pseudogene), putative                    | 1,905 | 0,03027    |
| TcCLB.511585.120 | hypothetical protein, conserved                         | 1,904 | 4,697E-49  |
| TcCLB.509429.320 | cysteine peptidase, putative                            | 1,903 | 4,903E-191 |
| TcCLB.511553.90  | mucin TcMUCII, putative                                 | 1,902 | 0,0001489  |
| TcCLB.510621.55  | mucin TcMUCII (pseudogene), putative                    | 1,901 | 0,009107   |
| TcCLB.508999.190 | calpain-like cysteine peptidase, putative               | 1,9   | 2,205E-139 |
| TcCLB.509011.10  | UDP-Gal or UDP-GlcNAc-dependent glycosyltransferase (p: | 1,898 | 3,122E-09  |
| TcCLB.509825.40  | hypothetical protein, conserved                         | 1,894 | 5,511E-48  |
| TcCLB.506989.140 | Elongation factor Ts, mitochondrial, putative (EF-Ts)   | 1,893 | 8,861E-46  |
| TcCLB.508461.280 | protein kinase A catalytic subunit isoform 2, putative  | 1,892 | 1,353E-32  |
| TcCLB.510129.11  | surface glycoprotein, putative                          | 1,891 | 3,038E-25  |
| TcCLB.510603.10  | hypothetical protein, conserved                         | 1,891 | 7,36E-14   |
| TcCLB.506219.20  | hypothetical protein                                    | 1,891 | 1,575E-13  |
| TcCLB.511571.20  | hypothetical protein, conserved                         | 1,889 | 6,219E-50  |
| TcCLB.509419.70  | trans-sialidase, Group V, putative                      | 1,887 | 0,00004123 |
| TcCLB.506499.149 | mucin TcMUCII, putative                                 | 1,887 | 0,0008859  |
| TcCLB.505201.9   | retrotransposon hot spot (RHS) protein, putative        | 1,886 | 5,492E-24  |
| TcCLB.508043.10  | trans-sialidase, putative                               | 1,886 | 7,179E-08  |
| TcCLB.511761.60  | hypothetical protein, conserved                         | 1,885 | 5,629E-19  |
| TcCLB.507821.130 | trans-sialidase, Group II, putative                     | 1,885 | 1,665E-09  |
| TcCLB.510101.380 | hypothetical protein, conserved                         | 1,883 | 3,506E-59  |
| TcCLB.509695.100 | hypothetical protein, conserved                         | 1,883 | 1,658E-27  |
| TcCLB.508931.40  | hypothetical protein, conserved                         | 1,883 | 1,683E-15  |
| TcCLB.510005.41  | retrotransposon hot spot (RHS) protein, putative        | 1,881 | 1,822E-52  |
| TcCLB.508207.90  | hypothetical protein, conserved                         | 1,879 | 2,818E-30  |
| TcCLB.509597.20  | carbonic anhydrase-like protein, putative               | 1,878 | 7,88E-73   |
| TcCLB.509387.19  | trans-sialidase, putative                               | 1,878 | 1,898E-24  |
| TcCLB.508013.90  | hypothetical protein                                    | 1,878 | 0,005692   |
| TcCLB.506945.190 | cytochrome p450-like protein, putative                  | 1,877 | 1,187E-78  |
| TcCLB.509157.90  | hypothetical protein, conserved                         | 1,874 | 2,002E-85  |
| TcCLB.511213.50  | mucin TcMUCII, putative                                 | 1,873 | 9,702E-08  |
| TcCLB.503581.30  | hypothetical protein, conserved                         | 1,872 | 1,617E-29  |
| TcCLB.504203.40  | hypothetical protein, conserved                         | 1,87  | 2,84E-79   |
| TcCLB.508799.260 | hypothetical protein, conserved                         | 1,87  | 3,328E-66  |
| TcCLB.508023.60  | trans-sialidase (pseudogene), putative                  | 1,87  | 6,999E-22  |
| TcCLB.510017.40  | mucin TcMUCII, putative                                 | 1,87  | 0,03101    |
| TcCLB.510583.100 | mucin TcMUCII, putative                                 | 1,87  | 0,06515    |

|                  |                                                           |       |            |
|------------------|-----------------------------------------------------------|-------|------------|
| TcCLB.507241.30  | arginine kinase                                           | 1,869 | 7,609E-18  |
| TcCLB.510621.70  | mucin TcMUCII, putative                                   | 1,869 | 0,03052    |
| TcCLB.509601.150 | hypothetical protein, conserved                           | 1,865 | 1,029E-39  |
| TcCLB.506459.149 | mucin-associated surface protein (MASP), putative         | 1,865 | 1,285E-21  |
| TcCLB.506189.20  | hypothetical protein, conserved                           | 1,864 | 2,104E-22  |
| TcCLB.505647.40  | endoribonuclease L-PSP (pb5), putative                    | 1,863 | 2,362E-119 |
| TcCLB.508699.70  | hypothetical protein, conserved                           | 1,862 | 7,382E-46  |
| TcCLB.507085.70  | mucin-associated surface protein (MASP, pseudogene), pu   | 1,862 | 0,00004125 |
| TcCLB.511743.10  | hypothetical protein, conserved                           | 1,861 | 3,164E-31  |
| TcCLB.504055.130 | trans-sialidase (pseudogene), putative                    | 1,861 | 9,074E-22  |
| TcCLB.506779.120 | hypothetical protein, conserved                           | 1,86  | 3,748E-44  |
| TcCLB.511531.20  | hypothetical protein, conserved                           | 1,86  | 6,118E-23  |
| TcCLB.506383.10  | mannosyl-oligosaccharide 1,2-alpha-mannosidase IB, puta   | 1,859 | 1,654E-26  |
| TcCLB.507479.51  | beta galactofuranosyl glycosyltransferase, putative       | 1,856 | 0,0001129  |
| TcCLB.503411.4   | hypothetical protein, conserved                           | 1,854 | 5,773E-07  |
| TcCLB.509787.10  | retrotransposon hot spot (RHS) protein, putative          | 1,853 | 8,999E-72  |
| TcCLB.509159.10  | ATP-dependent DNA DEAD/DEAH box helicase, putative (fr    | 1,852 | 9,253E-39  |
| TcCLB.507711.200 | hypothetical protein, conserved                           | 1,85  | 4,902E-171 |
| TcCLB.506469.80  | protein kinase, putative                                  | 1,85  | 4,953E-16  |
| TcCLB.509007.30  | hypothetical protein, conserved                           | 1,849 | 6,292E-23  |
| TcCLB.511583.40  | tricarboxylate carrier, putative                          | 1,847 | 3,139E-34  |
| TcCLB.415273.9   | mucin TcMUCII (pseudogene), putative                      | 1,847 | 0,07261    |
| TcCLB.509719.40  | cytochrome P450, putative                                 | 1,846 | 6,135E-41  |
| TcCLB.511625.130 | trans-sialidase, Group V, putative                        | 1,846 | 4,285E-15  |
| TcCLB.511813.20  | ubiquitin-conjugating enzyme E2, putative                 | 1,845 | 4,039E-57  |
| TcCLB.505853.10  | trans-sialidase, putative (fragment)                      | 1,845 | 0,0002165  |
| TcCLB.508677.50  | beta galactofuranosyl glycosyltransferase, putative       | 1,843 | 5,604E-29  |
| TcCLB.506873.4   | ATP-dependent DNA DEAD/DEAH box helicase, putative (fr    | 1,842 | 2,518E-13  |
| TcCLB.506843.100 | retrotransposon hot spot (RHS) protein, putative          | 1,841 | 2,373E-73  |
| TcCLB.506529.420 | alanine aminotransferase, putative                        | 1,841 | 1,788E-66  |
| TcCLB.505573.10  | trans-sialidase, putative (fragment)                      | 1,841 | 6,922E-07  |
| TcCLB.510887.50  | hypothetical protein, conserved                           | 1,836 | 6,038E-56  |
| TcCLB.508739.90  | hypothetical protein, conserved                           | 1,836 | 2,295E-20  |
| TcCLB.508547.160 | hypothetical protein, conserved                           | 1,835 | 1,128E-55  |
| TcCLB.511303.70  | hypothetical protein, conserved                           | 1,834 | 4,135E-31  |
| TcCLB.506169.21  | retrotransposon hot spot (RHS) protein, putative (fragmen | 1,833 | 1,299E-10  |
| TcCLB.511153.70  | hypothetical protein, conserved                           | 1,832 | 8,15E-30   |
| TcCLB.507479.20  | trans-sialidase, Group II, putative                       | 1,83  | 0,004172   |
| TcCLB.508461.84  | hypothetical protein                                      | 1,829 | 3,609E-38  |
| TcCLB.467373.10  | trans-sialidase, putative (fragment)                      | 1,829 | 8,983E-29  |
| TcCLB.509351.10  | delta-1-pyrroline-5-carboxylate dehydrogenase, putative   | 1,828 | 7,489E-30  |
| TcCLB.511843.30  | trans-sialidase (pseudogene), putative                    | 1,827 | 0,005942   |
| TcCLB.504151.60  | actin interacting protein-like protein, putative          | 1,825 | 5,005E-51  |
| TcCLB.504777.40  | mucin TcMUCII, putative                                   | 1,825 | 2,803E-07  |
| TcCLB.509151.10  | hypothetical protein, conserved                           | 1,824 | 3,543E-50  |



|                  |                                                                      |       |            |
|------------------|----------------------------------------------------------------------|-------|------------|
| TcCLB.508163.40  | mucin TcMUCII (pseudogene), putative                                 | 1,824 | 0,006777   |
| TcCLB.509791.140 | hypothetical protein, conserved                                      | 1,823 | 4,419E-27  |
| TcCLB.508419.20  | dispersed gene family protein 1 (DGF-1, pseudogene), putative        | 1,823 | 2,955E-21  |
| TcCLB.509377.20  | trans-sialidase, Group VII, putative                                 | 1,823 | 0,1787     |
| TcCLB.511173.496 | mucin-associated surface protein (MASP), putative (fragment)         | 1,822 | 0,02637    |
| TcCLB.506781.39  | mucin-associated surface protein (MASP), putative                    | 1,822 | 0,07343    |
| TcCLB.508163.50  | mucin-associated surface protein (MASP), putative                    | 1,821 | 3,164E-06  |
| TcCLB.511015.30  | Trichohyalin, putative (fragment)                                    | 1,818 | 6,744E-103 |
| TcCLB.504655.9   | mucin-associated surface protein (MASP), putative                    | 1,818 | 1,504E-77  |
| TcCLB.510069.20  | protein associated with differentiation 4, putative                  | 1,818 | 1,581E-62  |
| TcCLB.508643.20  | hypothetical protein, conserved                                      | 1,818 | 4,123E-48  |
| TcCLB.509295.80  | retrotransposon hot spot (RHS) protein, putative                     | 1,817 | 1,647E-43  |
| TcCLB.506795.80  | proline racemase                                                     | 1,817 | 3,443E-33  |
| TcCLB.503471.10  | protein tyrosine phosphatase, putative                               | 1,817 | 4,118E-31  |
| TcCLB.503827.30  | mucin TcMUCII, putative                                              | 1,817 | 0,1451     |
| TcCLB.505647.60  | hypothetical protein, conserved                                      | 1,816 | 1,111E-37  |
| TcCLB.503893.80  | NADH dehydrogenase [ubiquinone] iron-sulfur protein 7, mitochondrial | 1,816 | 4,839E-28  |
| TcCLB.507695.14  | dispersed gene family protein 1 (DGF-1), putative                    | 1,816 | 0,001932   |
| TcCLB.506129.60  | beta galactofuranosyl glycosyltransferase, putative                  | 1,815 | 2,824E-06  |
| TcCLB.505919.70  | glycine dehydrogenase [decarboxylating] (pseudogene), putative       | 1,814 | 1,471E-11  |
| TcCLB.510149.60  | hypothetical protein, conserved                                      | 1,813 | 3,386E-27  |
| TcCLB.509029.80  | hypothetical protein                                                 | 1,812 | 1,761E-30  |
| TcCLB.510095.10  | hypothetical protein                                                 | 1,811 | 0,002041   |
| TcCLB.510515.30  | hypothetical protein, conserved                                      | 1,81  | 3,092E-50  |
| TcCLB.510035.10  | trans-sialidase (pseudogene), putative                               | 1,81  | 1,143E-49  |
| TcCLB.507049.60  | NAD(P)-dependent oxidoreductase, putative                            | 1,808 | 8,388E-53  |
| TcCLB.511807.60  | hypothetical protein, conserved                                      | 1,806 | 1,943E-49  |
| TcCLB.506041.20  | hypothetical protein, conserved                                      | 1,805 | 7,987E-33  |
| TcCLB.509975.30  | mucin-associated surface protein (MASP), putative                    | 1,805 | 1,886E-17  |
| TcCLB.511471.120 | retrotransposon hot spot protein (RHS, pseudogene), putative         | 1,804 | 4,298E-57  |
| TcCLB.506819.40  | hypothetical protein, conserved                                      | 1,801 | 8,151E-26  |
| TcCLB.503615.10  | UDP-Gal or UDP-GlcNAc-dependent glycosyltransferase, putative        | 1,801 | 2,481E-12  |
| TcCLB.508163.240 | hypothetical protein                                                 | 1,801 | 0,01466    |
| TcCLB.508493.130 | mucin TcMUCII, putative                                              | 1,798 | 1,037E-06  |
| TcCLB.504105.250 | hypothetical protein                                                 | 1,795 | 6,538E-21  |
| TcCLB.508495.110 | hypothetical protein                                                 | 1,795 | 0,009086   |
| TcCLB.508023.150 | trans-sialidase (pseudogene), putative                               | 1,794 | 5,769E-26  |
| TcCLB.504539.10  | mucin TcSMUGL, putative                                              | 1,794 | 0,00004215 |
| TcCLB.508109.10  | mucin-associated surface protein (MASP), putative                    | 1,794 | 0,03914    |
| TcCLB.503955.55  | hypothetical protein, conserved                                      | 1,793 | 6,836E-20  |
| TcCLB.506171.10  | retrotransposon hot spot (RHS) protein, putative                     | 1,793 | 3,185E-12  |
| TcCLB.508013.110 | mucin-associated surface protein (MASP), putative                    | 1,793 | 0,01048    |
| TcCLB.508931.10  | hypothetical protein                                                 | 1,792 | 6,607E-24  |
| TcCLB.506373.39  | trans-sialidase, putative (fragment)                                 | 1,792 | 1,332E-10  |
| TcCLB.510437.40  | cytosolic malate dehydrogenase, putative                             | 1,791 | 1,893E-53  |

|                  |                                                             |       |            |
|------------------|-------------------------------------------------------------|-------|------------|
| TcCLB.424937.10  | glucose transporter, putative                               | 1,79  | 7,503E-27  |
| TcCLB.509765.129 | trans-sialidase, putative (fragment)                        | 1,788 | 5,596E-26  |
| TcCLB.511513.14  | hypothetical protein, conserved                             | 1,788 | 2,678E-08  |
| TcCLB.509611.180 | peptide methionine sulfoxide reductase, putative            | 1,785 | 6,261E-34  |
| TcCLB.511693.130 | hypothetical protein                                        | 1,785 | 2,911E-31  |
| TcCLB.510153.19  | tricarboxylate carrier, putative                            | 1,785 | 7,819E-18  |
| TcCLB.506475.105 | hypothetical protein, conserved                             | 1,784 | 2,437E-25  |
| TcCLB.504427.20  | hypothetical protein, conserved                             | 1,78  | 1,994E-19  |
| TcCLB.507297.10  | cruzipain precursor, putative                               | 1,779 | 1,146E-122 |
| TcCLB.508285.50  | retrotransposon hot spot protein (RHS, pseudogene), putat   | 1,779 | 2,181E-33  |
| TcCLB.511063.180 | trans-sialidase (pseudogene), putative                      | 1,779 | 0,00002494 |
| TcCLB.504769.170 | retrotransposon hot spot protein (RHS, pseudogene), putat   | 1,778 | 5,958E-35  |
| TcCLB.508261.60  | mucin TcMUCII, putative                                     | 1,776 | 0,02175    |
| TcCLB.509767.59  | protoheme IX farnesyltransferase, putative                  | 1,775 | 1,293E-48  |
| TcCLB.504393.30  | trans-sialidase (pseudogene), putative                      | 1,773 | 0,00003356 |
| TcCLB.503851.32  | trans-sialidase (pseudogene), putative                      | 1,772 | 2,096E-07  |
| TcCLB.503769.40  | cytochrome oxidase subunit VII (COXVII)                     | 1,771 | 2,183E-73  |
| TcCLB.503845.30  | retrotransposon hot spot protein (RHS, pseudogene), putat   | 1,771 | 1,967E-50  |
| TcCLB.511295.60  | hypothetical protein, conserved (pseudogene)                | 1,771 | 1,578E-37  |
| TcCLB.511179.150 | alanine racemase, putative                                  | 1,771 | 2,541E-22  |
| TcCLB.506139.120 | trans-sialidase, Group V, putative                          | 1,771 | 2,037E-09  |
| TcCLB.506755.20  | paraflagellar rod component, putative                       | 1,769 | 1,604E-35  |
| TcCLB.507009.30  | ribulose-phosphate 3-epimerase, putative                    | 1,769 | 1,771E-21  |
| TcCLB.507465.10  | receptor-type adenylate cyclase, putative (fragment)        | 1,769 | 6,483E-07  |
| TcCLB.511911.30  | mismatch repair protein MSH4 (pseudogene), putative         | 1,768 | 6,035E-34  |
| TcCLB.508837.90  | hypothetical protein, conserved                             | 1,768 | 2,742E-30  |
| TcCLB.505193.110 | serine/threonine protein kinase, putative                   | 1,767 | 3,475E-83  |
| TcCLB.506975.40  | amidohydrolase, putative                                    | 1,767 | 1,313E-61  |
| TcCLB.508041.40  | hypothetical protein                                        | 1,766 | 2,077E-52  |
| TcCLB.449247.10  | hypothetical protein, conserved                             | 1,765 | 2,22E-15   |
| TcCLB.511821.160 | microtubial binding protein, putative                       | 1,765 | 1,372E-10  |
| TcCLB.509601.90  | alanine racemase, putative                                  | 1,763 | 9,505E-48  |
| TcCLB.463451.10  | hypothetical protein, conserved                             | 1,758 | 2,031E-33  |
| TcCLB.506823.50  | retrotransposon hot spot protein (RHS, pseudogene), putat   | 1,756 | 2,943E-45  |
| TcCLB.504177.30  | hypothetical protein, conserved                             | 1,754 | 1,092E-35  |
| TcCLB.506467.50  | serine/threonine protein kinase, putative                   | 1,753 | 6,097E-57  |
| TcCLB.508677.40  | trans-sialidase, Group VIII, putative                       | 1,75  | 3,545E-17  |
| TcCLB.509123.10  | surface antigen TASV, putative                              | 1,749 | 4,608E-24  |
| TcCLB.509337.5   | hypothetical protein, conserved (pseudogene)                | 1,746 | 3,593E-27  |
| TcCLB.507515.4   | trypanothione/tryparedoxin dependent peroxidase 2, putat    | 1,744 | 1,247E-58  |
| TcCLB.510349.50  | CDP-diacylglycerol--inositol 3-phosphatidyltransferase, put | 1,743 | 3,853E-21  |
| TcCLB.507537.20  | cysteine peptidase, putative                                | 1,742 | 1,963E-89  |
| TcCLB.509563.10  | hypothetical protein, conserved                             | 1,741 | 5,412E-33  |
| TcCLB.507009.50  | hypothetical protein, conserved                             | 1,741 | 6,964E-21  |
| TcCLB.508119.200 | hypothetical protein                                        | 1,739 | 1,534E-58  |

|                  |                                                             |       |            |
|------------------|-------------------------------------------------------------|-------|------------|
| TcCLB.510977.20  | hypothetical protein, conserved (pseudogene)                | 1,739 | 2,188E-23  |
| TcCLB.503401.29  | hypothetical protein, conserved                             | 1,739 | 7,281E-20  |
| TcCLB.506321.110 | mucin TcMUCII, putative                                     | 1,739 | 1,394E-07  |
| TcCLB.511573.10  | leucine-rich repeat protein, putative                       | 1,737 | 7,204E-10  |
| TcCLB.506309.70  | mucin-associated surface protein (MASP), putative           | 1,737 | 0,08318    |
| TcCLB.506633.10  | protein kinase, putative                                    | 1,736 | 1,556E-17  |
| TcCLB.509391.20  | flagellar calcium-binding protein, putative                 | 1,736 | 0,06779    |
| TcCLB.511589.70  | ADP-ribosylation factor GTPase activating protein, putative | 1,735 | 1,143E-30  |
| TcCLB.511829.20  | retrotransposon hot spot protein (RHS, pseudogene), putat   | 1,735 | 2,416E-10  |
| TcCLB.509427.50  | retrotransposon hot spot protein (RHS, pseudogene), putat   | 1,733 | 1,909E-32  |
| TcCLB.511449.110 | surface protease GP63, putative                             | 1,733 | 0,0003215  |
| TcCLB.507357.60  | mucin TcMUCII, putative                                     | 1,733 | 0,01601    |
| TcCLB.507091.50  | aspartate carbamoyltransferase, putative                    | 1,731 | 7,132E-27  |
| TcCLB.509721.60  | poly(ADP-ribose) polymerase, putative                       | 1,73  | 7,121E-47  |
| TcCLB.508493.40  | mucin TcMUCII, putative                                     | 1,73  | 9,778E-09  |
| TcCLB.507615.130 | hypothetical protein, conserved                             | 1,728 | 1,391E-20  |
| TcCLB.504039.99  | mucin TcMUCII (pseudogene), putative                        | 1,728 | 0,003646   |
| TcCLB.505789.10  | hypothetical protein, conserved                             | 1,726 | 2,842E-20  |
| TcCLB.508147.140 | mucin TcMUCII, putative                                     | 1,725 | 0,02921    |
| TcCLB.507487.30  | mucin TcMUCII, putative                                     | 1,724 | 0,05143    |
| TcCLB.510675.9   | dispersed gene family protein 1 (DGF-1), putative (fragme   | 1,723 | 0,00000491 |
| TcCLB.504055.100 | retrotransposon hot spot protein (RHS, pseudogene), putat   | 1,723 | 0,0003316  |
| TcCLB.508165.270 | mucin TcMUCII, putative                                     | 1,722 | 0,1679     |
| TcCLB.511597.40  | mucin-associated surface protein (MASP), putative           | 1,721 | 0,03062    |
| TcCLB.507675.10  | hypothetical protein, conserved                             | 1,72  | 3,935E-70  |
| TcCLB.508885.5   | mucin-associated surface protein (MASP), putative           | 1,717 | 0,257      |
| TcCLB.509223.20  | retrotransposon hot spot (RHS) protein, putative            | 1,716 | 4,502E-38  |
| TcCLB.504199.4   | hypothetical protein, conserved                             | 1,716 | 1,055E-06  |
| TcCLB.504427.230 | trans-sialidase, Group VIII, putative                       | 1,716 | 0,1697     |
| TcCLB.511827.80  | hypothetical protein, conserved                             | 1,715 | 7,429E-20  |
| TcCLB.505945.30  | ribonuclease mar1, putative                                 | 1,714 | 1,821E-32  |
| TcCLB.504111.40  | hypothetical protein, conserved                             | 1,713 | 1,136E-19  |
| TcCLB.508387.140 | hypothetical protein, conserved                             | 1,712 | 2,403E-37  |
| TcCLB.509147.50  | mucin TcSMUGL, putative                                     | 1,712 | 1,328E-34  |
| TcCLB.483389.10  | retrotransposon hot spot protein (RHS, pseudogene), putat   | 1,711 | 1,06E-39   |
| TcCLB.506783.39  | mucin-associated surface protein (MASP), putative           | 1,71  | 0,04819    |
| TcCLB.422189.20  | leucine-rich repeat protein, putative                       | 1,709 | 6,12E-14   |
| TcCLB.509155.39  | surface protease GP63, putative                             | 1,709 | 0,1075     |
| TcCLB.505975.20  | trans-sialidase, Group IV, putative                         | 1,708 | 5,249E-16  |
| TcCLB.503897.60  | hypothetical protein, conserved                             | 1,706 | 5,658E-26  |
| TcCLB.511649.14  | hypothetical protein, conserved (fragment)                  | 1,706 | 1,259E-14  |
| TcCLB.510659.270 | hypothetical protein, conserved                             | 1,705 | 1,439E-29  |
| TcCLB.506563.130 | calpain-like cysteine peptidase (pseudogene), putative      | 1,702 | 5,042E-24  |
| TcCLB.507801.110 | hypothetical protein, conserved                             | 1,701 | 5,114E-36  |
| TcCLB.507699.130 | mucin-associated surface protein (MASP), putative           | 1,699 | 0,00000251 |

|                  |                                                               |       |            |
|------------------|---------------------------------------------------------------|-------|------------|
| TcCLB.510583.200 | mucin TcMUCII, putative                                       | 1,699 | 0,03032    |
| TcCLB.506595.149 | retrotransposon hot spot (RHS) protein, putative              | 1,698 | 8,757E-79  |
| TcCLB.509289.39  | hypothetical protein, conserved (pseudogene)                  | 1,698 | 3,514E-20  |
| TcCLB.511145.10  | cytochrome c oxidase subunit VI, putative                     | 1,697 | 1,077E-35  |
| TcCLB.506627.20  | hypothetical protein, conserved                               | 1,696 | 7,263E-69  |
| TcCLB.509097.20  | trans-sialidase, Group V, putative                            | 1,696 | 0,00006403 |
| TcCLB.509911.20  | hypothetical protein                                          | 1,695 | 2,418E-10  |
| TcCLB.511553.209 | mucin TcMUC (pseudogene), putative                            | 1,695 | 0,008891   |
| TcCLB.507537.10  | cruzipain precursor (pseudogene), putative                    | 1,694 | 3,368E-54  |
| TcCLB.509815.20  | trans-sialidase (pseudogene), putative                        | 1,694 | 4,346E-18  |
| TcCLB.506057.15  | hypothetical protein                                          | 1,694 | 0,0005483  |
| TcCLB.511259.9   | mucin TcMUCI, putative                                        | 1,694 | 0,1084     |
| TcCLB.509677.10  | hypothetical protein, conserved                               | 1,693 | 8,867E-27  |
| TcCLB.510507.29  | hypothetical protein, conserved                               | 1,692 | 9,34E-21   |
| TcCLB.510095.5   | retrotransposon hot spot protein (RHS, pseudogene), putative  | 1,692 | 0,004597   |
| TcCLB.506999.191 | hypothetical protein, conserved (fragment)                    | 1,691 | 0,0000515  |
| TcCLB.508555.20  | hypothetical protein, conserved                               | 1,69  | 5,541E-19  |
| TcCLB.511675.3   | surface antigen TASV, putative                                | 1,69  | 2,76E-18   |
| TcCLB.508001.70  | retrotransposon hot spot (RHS) protein, putative              | 1,689 | 8,094E-35  |
| TcCLB.508569.140 | hypothetical protein, conserved                               | 1,689 | 2,023E-19  |
| TcCLB.509225.21  | hypothetical protein                                          | 1,689 | 0,00001886 |
| TcCLB.507555.80  | retrotransposon hot spot (RHS) protein, putative              | 1,688 | 1,261E-77  |
| TcCLB.503405.10  | glutamine synthetase, putative                                | 1,686 | 1,826E-46  |
| TcCLB.508151.10  | mucin TcMUCII, putative                                       | 1,686 | 0,001004   |
| TcCLB.507067.40  | mucin TcMUCII, putative                                       | 1,686 | 0,005503   |
| TcCLB.506611.70  | surface protease GP63, putative                               | 1,685 | 0,004464   |
| TcCLB.506923.21  | mucin TcMUCII, putative                                       | 1,684 | 0,00001867 |
| TcCLB.503811.60  | Elongation factor Ts, mitochondrial, putative (EF-Ts)         | 1,683 | 7,906E-42  |
| TcCLB.511573.40  | Mitogen-activated protein kinase 10, putative (MPK10)         | 1,683 | 5,204E-37  |
| TcCLB.509791.100 | hypothetical protein, conserved                               | 1,683 | 4,598E-29  |
| TcCLB.504083.20  | retrotransposon hot spot protein (RHS, pseudogene), putative  | 1,682 | 0,06636    |
| TcCLB.507225.19  | hypothetical protein                                          | 1,681 | 1,992E-33  |
| TcCLB.507669.139 | hypothetical protein, conserved                               | 1,681 | 2,841E-24  |
| TcCLB.476833.10  | trans-sialidase, putative                                     | 1,681 | 0,03878    |
| TcCLB.506573.5   | surface antigen TASV-A8, putative (TASV-A8)                   | 1,68  | 2,23E-46   |
| TcCLB.510479.20  | dispersed gene family protein 1 (DGF-1, pseudogene), putative | 1,68  | 3,065E-13  |
| TcCLB.506243.77  | retrotransposon hot spot protein (RHS, pseudogene), putative  | 1,679 | 2,489E-07  |
| TcCLB.510741.170 | hypothetical protein                                          | 1,678 | 2,066E-32  |
| TcCLB.509815.90  | retrotransposon hot spot protein (RHS, pseudogene), putative  | 1,678 | 2,44E-23   |
| TcCLB.509901.160 | hypothetical protein, conserved                               | 1,678 | 1,036E-17  |
| TcCLB.508221.820 | mucin-associated surface protein (MASP), putative             | 1,678 | 0,00001221 |
| TcCLB.506665.30  | trans-sialidase, putative (fragment)                          | 1,678 | 0,000644   |
| TcCLB.510693.220 | mucin TcMUCII, putative                                       | 1,678 | 0,005071   |
| TcCLB.511575.10  | hypothetical protein, conserved                               | 1,677 | 6,007E-20  |
| TcCLB.508153.605 | hypothetical protein, conserved                               | 1,676 | 1,223E-27  |

|                  |                                                             |       |            |
|------------------|-------------------------------------------------------------|-------|------------|
| TcCLB.506989.10  | hypothetical protein, conserved                             | 1,676 | 4,213E-23  |
| TcCLB.509387.5   | trans-sialidase, putative                                   | 1,676 | 3,788E-11  |
| TcCLB.506983.48  | calpain-like cysteine peptidase, putative                   | 1,675 | 1,615E-30  |
| TcCLB.506149.10  | folate/pteridine transporter, putative                      | 1,674 | 1,416E-29  |
| TcCLB.506713.80  | trans-sialidase, putative (fragment)                        | 1,674 | 1,614E-17  |
| TcCLB.506353.10  | trans-sialidase, Group II, putative                         | 1,674 | 1,321E-06  |
| TcCLB.506485.100 | hypothetical protein, conserved                             | 1,672 | 1,545E-25  |
| TcCLB.506633.90  | folate/pteridine transporter, putative                      | 1,67  | 1,655E-67  |
| TcCLB.506835.159 | casein kinase 1 isoform 2, putative (fragment)              | 1,669 | 5,014E-08  |
| TcCLB.510957.9   | calpain-like cysteine peptidase, putative                   | 1,664 | 3,42E-86   |
| TcCLB.508173.150 | protein disulfide isomerase, putative                       | 1,664 | 1,195E-41  |
| TcCLB.506775.140 | hypothetical protein, conserved                             | 1,664 | 1,014E-17  |
| TcCLB.509785.50  | trans-sialidase, Group V, putative                          | 1,664 | 1,461E-09  |
| TcCLB.511277.390 | hypothetical protein, conserved                             | 1,663 | 4,397E-42  |
| TcCLB.508945.10  | hypothetical protein, conserved                             | 1,663 | 5,038E-29  |
| TcCLB.508893.10  | hypothetical protein, conserved                             | 1,662 | 4,423E-31  |
| TcCLB.506597.20  | mucin-associated surface protein (MASP, pseudogene), pu     | 1,662 | 0,03304    |
| TcCLB.510025.70  | 90 kDa surface protein, putative                            | 1,661 | 0,009499   |
| TcCLB.510847.20  | beta galactofuranosyl glycosyltransferase, putative         | 1,66  | 1,29E-13   |
| TcCLB.509495.49  | mucin TcMUCII, putative                                     | 1,66  | 4,46E-07   |
| TcCLB.510743.70  | lactoylglutathione lyase-like protein, putative             | 1,659 | 1,036E-50  |
| TcCLB.510381.30  | hypothetical protein, conserved                             | 1,658 | 3,825E-37  |
| TcCLB.509207.80  | glycogen synthase kinase-3 alpha, putative                  | 1,658 | 2,776E-35  |
| TcCLB.507925.40  | pyridoxal kinase, putative                                  | 1,658 | 3,345E-25  |
| TcCLB.507357.135 | hypothetical protein                                        | 1,658 | 0,01791    |
| TcCLB.507723.50  | trans-sialidase, Group IV, putative                         | 1,657 | 1,397E-06  |
| TcCLB.511099.230 | mucin TcMUCII, putative                                     | 1,657 | 0,04013    |
| TcCLB.511821.150 | hypothetical protein, conserved                             | 1,656 | 7,082E-20  |
| TcCLB.507569.4   | electron transport protein SCO1/SCO2, putative              | 1,654 | 4,001E-21  |
| TcCLB.507699.180 | mucin-associated surface protein (MASP, pseudogene), pu     | 1,654 | 0,0001088  |
| TcCLB.506571.20  | retrotransposon hot spot protein (RHS, pseudogene), putat   | 1,653 | 2,243E-18  |
| TcCLB.507625.140 | membrane transporter protein, putative                      | 1,652 | 7,051E-36  |
| TcCLB.511693.20  | hypothetical protein, conserved                             | 1,652 | 7,903E-19  |
| TcCLB.507157.10  | mucin TcSMUGL, putative                                     | 1,652 | 3,845E-09  |
| TcCLB.511063.30  | trans-sialidase (pseudogene), putative                      | 1,651 | 0,00005022 |
| TcCLB.510861.140 | serine/threonine protein kinase, putative                   | 1,65  | 3,439E-68  |
| TcCLB.506773.44  | cytochrome b5, putative                                     | 1,65  | 4,776E-41  |
| TcCLB.509259.50  | retrotransposon hot spot protein (RHS, pseudogene), putat   | 1,65  | 2,407E-27  |
| TcCLB.509335.10  | retrotransposon hot spot (RHS) protein, putative            | 1,649 | 3,505E-68  |
| TcCLB.446325.9   | retrotransposon hot spot (RHS) protein, putative (fragment) | 1,649 | 1,927E-24  |
| TcCLB.510207.21  | mucin-associated surface protein (MASP, pseudogene), pu     | 1,648 | 0,002629   |
| TcCLB.510101.140 | pyruvate phosphate dikinase, putative                       | 1,647 | 2,089E-52  |
| TcCLB.503411.10  | hypothetical protein                                        | 1,647 | 9,158E-35  |
| TcCLB.506015.40  | mucin TcMUCI, putative                                      | 1,646 | 0,00008154 |
| TcCLB.507993.270 | hypothetical protein, conserved                             | 1,642 | 5,587E-29  |

|                  |                                                           |       |            |
|------------------|-----------------------------------------------------------|-------|------------|
| TcCLB.508549.20  | hypothetical protein, conserved                           | 1,641 | 1,53E-51   |
| TcCLB.509959.90  | retrotransposon hot spot protein (RHS, pseudogene), putat | 1,64  | 9,677E-21  |
| TcCLB.510693.40  | 90 kDa surface protein, putative                          | 1,64  | 0,007388   |
| TcCLB.509601.20  | hypothetical protein, conserved                           | 1,639 | 9,055E-12  |
| TcCLB.506565.20  | hypothetical protein, conserved                           | 1,638 | 3,128E-15  |
| TcCLB.506063.50  | retrotransposon hot spot protein (RHS, pseudogene), putat | 1,638 | 2,093E-12  |
| TcCLB.487455.10  | trans-sialidase, putative (fragment)                      | 1,638 | 0,02993    |
| TcCLB.511807.190 | hypothetical protein, conserved                           | 1,636 | 3,702E-57  |
| TcCLB.506277.10  | mucin-associated surface protein (MASP), putative         | 1,636 | 0,0000129  |
| TcCLB.503973.250 | mucin TcMUCII (pseudogene), putative                      | 1,636 | 0,00007883 |
| TcCLB.506773.90  | amino acid permease/transporter, putative                 | 1,635 | 7,002E-63  |
| TcCLB.511351.30  | protein kinase, putative                                  | 1,635 | 6,876E-60  |
| TcCLB.511367.210 | ubiquitin-conjugating enzyme variant Kua homologue, puta  | 1,635 | 3,486E-23  |
| TcCLB.506721.50  | hypothetical protein                                      | 1,635 | 1,735E-07  |
| TcCLB.507071.170 | mucin TcMUCII, putative                                   | 1,634 | 5,614E-06  |
| TcCLB.504797.20  | hypothetical protein, conserved                           | 1,632 | 3,289E-31  |
| TcCLB.506399.30  | hypothetical protein, conserved                           | 1,632 | 1,497E-25  |
| TcCLB.510233.20  | hypothetical protein                                      | 1,632 | 0,003017   |
| TcCLB.511057.20  | mucin TcMUCII, putative                                   | 1,631 | 0,004444   |
| TcCLB.509849.30  | hypothetical protein                                      | 1,63  | 1,92E-68   |
| TcCLB.510377.270 | retrotransposon hot spot protein (RHS, pseudogene), putat | 1,63  | 0,0000189  |
| TcCLB.507031.90  | arginase, putative                                        | 1,629 | 3,408E-42  |
| TcCLB.507669.20  | hypothetical protein, conserved                           | 1,628 | 2,296E-38  |
| TcCLB.511323.50  | NADH-ubiquinone oxidoreductase, mitochondrial, putative   | 1,628 | 1,708E-18  |
| TcCLB.508231.40  | hypothetical protein, conserved                           | 1,627 | 8,718E-58  |
| TcCLB.506381.10  | retrotransposon hot spot protein (RHS, pseudogene), putat | 1,627 | 3,491E-15  |
| TcCLB.509637.36  | procyclic form surface glycoprotein, putative (fragment)  | 1,625 | 1,737E-20  |
| TcCLB.505919.31  | hypothetical protein, conserved (pseudogene)              | 1,625 | 1,455E-13  |
| TcCLB.510791.20  | mucin TcMUCII, putative                                   | 1,625 | 9,512E-07  |
| TcCLB.506399.70  | hypothetical protein, conserved                           | 1,624 | 3,855E-19  |
| TcCLB.509977.80  | mucin-associated surface protein (MASP), putative         | 1,624 | 3,994E-09  |
| TcCLB.506131.199 | mucin TcMUCII, putative                                   | 1,624 | 0,02862    |
| TcCLB.506195.160 | hypothetical protein, conserved                           | 1,623 | 9,246E-37  |
| TcCLB.510359.430 | trans-sialidase (pseudogene), putative                    | 1,623 | 9,582E-24  |
| TcCLB.510101.450 | hypothetical protein, conserved                           | 1,621 | 4,994E-49  |
| TcCLB.511821.170 | hypothetical protein, conserved                           | 1,62  | 2,338E-15  |
| TcCLB.439245.10  | mucin TcMUCII, putative (fragment)                        | 1,62  | 0,02145    |
| TcCLB.511599.80  | trans-sialidase, Group V, putative                        | 1,619 | 4,076E-13  |
| TcCLB.508887.20  | mucin TcMUCII, putative                                   | 1,619 | 0,003079   |
| TcCLB.509329.20  | retrotransposon hot spot protein (RHS, pseudogene), putat | 1,617 | 1,771E-45  |
| TcCLB.504427.75  | hypothetical protein, conserved (pseudogene)              | 1,617 | 1,672E-14  |
| TcCLB.509099.50  | trypanothione synthetase (TRYS)                           | 1,616 | 1,522E-72  |
| TcCLB.506835.70  | PAS-domain containing phosphoglycerate kinase, putative   | 1,616 | 1,625E-50  |
| TcCLB.511821.179 | hypothetical protein, conserved                           | 1,616 | 5,521E-49  |
| TcCLB.509799.50  | hypothetical protein, conserved                           | 1,616 | 1,957E-38  |

|                  |                                                           |       |            |
|------------------|-----------------------------------------------------------|-------|------------|
| TcCLB.508789.204 | mucin-associated surface protein (MASP, pseudogene), pu   | 1,615 | 0,007234   |
| TcCLB.507467.10  | receptor-type adenylate cyclase, putative (fragment)      | 1,614 | 4,587E-09  |
| TcCLB.510503.70  | trans-sialidase (pseudogene), putative                    | 1,614 | 0,00002429 |
| TcCLB.507603.270 | cruzipain precursor, putative                             | 1,613 | 1,444E-34  |
| TcCLB.510283.70  | glycosyl hydrolase-like protein, putative                 | 1,612 | 1,859E-39  |
| TcCLB.510889.140 | alanine aminotransferase, putative                        | 1,611 | 1,853E-42  |
| TcCLB.511693.70  | hypothetical protein, conserved                           | 1,611 | 7,932E-33  |
| TcCLB.508159.60  | mucin TcMUCII, putative                                   | 1,611 | 0,003259   |
| TcCLB.508045.14  | hypothetical protein, conserved                           | 1,609 | 1,661E-23  |
| TcCLB.511259.189 | mucin TcMUCII, putative                                   | 1,609 | 0,04248    |
| TcCLB.506769.80  | mucin-associated surface protein (MASP), putative         | 1,606 | 0,000641   |
| TcCLB.508651.10  | dispersed gene family protein 1 (DGF-1, pseudogene), puta | 1,606 | 0,003092   |
| TcCLB.506533.106 | mucin TcSMUGL, putative                                   | 1,605 | 2,11E-34   |
| TcCLB.511701.19  | surface protease GP63, putative (fragment)                | 1,604 | 0,1442     |
| TcCLB.510857.4   | hypothetical protein, conserved                           | 1,603 | 1,617E-29  |
| TcCLB.508071.90  | retrotransposon hot spot (RHS) protein, putative          | 1,601 | 1,434E-44  |
| TcCLB.509493.100 | mucin-associated surface protein (MASP, pseudogene), pu   | 1,601 | 1,646E-12  |
| TcCLB.509875.240 | hypothetical protein, conserved                           | 1,599 | 1,772E-42  |
| TcCLB.506675.110 | retrotransposon hot spot (RHS) protein, putative          | 1,598 | 5,215E-27  |
| TcCLB.508493.20  | mucin-associated surface protein (MASP, pseudogene), pu   | 1,598 | 4,54E-11   |
| TcCLB.509493.39  | mucin TcMUCII, putative                                   | 1,595 | 2,098E-07  |
| TcCLB.508741.170 | glycerate kinase, putative                                | 1,594 | 7,331E-133 |
| TcCLB.506529.300 | hypothetical protein, conserved                           | 1,593 | 9,285E-50  |
| TcCLB.511003.110 | hypothetical protein, conserved                           | 1,593 | 1,058E-24  |
| TcCLB.508221.509 | mucin-associated surface protein (MASP, pseudogene), pu   | 1,593 | 0,02976    |
| TcCLB.507499.30  | retrotransposon hot spot protein (RHS, pseudogene), putat | 1,592 | 3,935E-16  |
| TcCLB.511827.115 | hypothetical protein                                      | 1,592 | 5,766E-09  |
| TcCLB.509153.100 | arginine N-methyltransferase, type III, putative (PRMT7)  | 1,59  | 1,842E-59  |
| TcCLB.506941.180 | hypothetical protein, conserved                           | 1,589 | 1,194E-26  |
| TcCLB.508503.10  | fatty acid desaturase, putative                           | 1,589 | 3,096E-22  |
| TcCLB.508119.20  | mucin-associated surface protein (MASP), putative         | 1,589 | 1,705E-10  |
| TcCLB.506989.110 | NADH-ubiquinone oxidoreductase complex I subunit, putati  | 1,588 | 1,448E-26  |
| TcCLB.504239.240 | mucin-associated surface protein (MASP, pseudogene), pu   | 1,588 | 0,2144     |
| TcCLB.508989.9   | nucleoside phosphorylase, putative                        | 1,586 | 2,141E-55  |
| TcCLB.505401.31  | trans-sialidase (pseudogene), putative                    | 1,586 | 4,025E-17  |
| TcCLB.508027.110 | pyroglutamyl-peptidase I, putative (PPI)                  | 1,585 | 1,821E-32  |
| TcCLB.511149.10  | mucin TcMUCII, putative                                   | 1,585 | 0,05267    |
| TcCLB.510863.30  | hypothetical protein, conserved                           | 1,584 | 3,84E-22   |
| TcCLB.511303.150 | hypothetical protein, conserved                           | 1,584 | 3,02E-18   |
| TcCLB.510555.10  | mucin-associated surface protein (MASP, pseudogene), pu   | 1,584 | 0,001669   |
| TcCLB.506763.190 | mucin TcMUCII, putative                                   | 1,584 | 0,009992   |
| TcCLB.505609.10  | trans-sialidase, Group II, putative                       | 1,584 | 0,3048     |
| TcCLB.506763.80  | mucin TcMUCII, putative                                   | 1,583 | 0,01459    |
| TcCLB.509601.120 | hypothetical protein, conserved                           | 1,581 | 2,571E-50  |
| TcCLB.510155.50  | hypothetical protein, conserved                           | 1,581 | 7,006E-29  |

|                  |                                                               |       |            |
|------------------|---------------------------------------------------------------|-------|------------|
| TcCLB.504081.270 | mucin TcMUCII, putative                                       | 1,58  | 0,01503    |
| TcCLB.508873.289 | 90 kDa surface protein, putative                              | 1,578 | 0,02301    |
| TcCLB.509961.70  | dispersed gene family protein 1 (DGF-1, pseudogene), putative | 1,575 | 2,021E-22  |
| TcCLB.506047.20  | retrotransposon hot spot (RHS) protein, putative              | 1,574 | 8,712E-38  |
| TcCLB.508989.120 | hypothetical protein, conserved                               | 1,574 | 7,901E-17  |
| TcCLB.509027.20  | ankyrin repeat protein, putative                              | 1,574 | 8,776E-13  |
| TcCLB.508493.10  | mucin TcMUCII, putative                                       | 1,574 | 0,00001393 |
| TcCLB.506537.200 | trans-sialidase, Group VIII, putative                         | 1,573 | 2,761E-17  |
| TcCLB.507739.40  | uracil phosphoribosyltransferase, putative                    | 1,572 | 1,408E-43  |
| TcCLB.510497.90  | mucin TcMUCII, putative                                       | 1,572 | 0,002791   |
| TcCLB.510237.60  | mucin TcMUCII, putative                                       | 1,572 | 0,02768    |
| TcCLB.509427.30  | dispersed gene family protein 1 (DGF-1, pseudogene), putative | 1,57  | 0,00006112 |
| TcCLB.510431.20  | hypothetical protein, conserved                               | 1,569 | 1,982E-17  |
| TcCLB.509151.29  | hypothetical protein, conserved (pseudogene)                  | 1,569 | 1,202E-06  |
| TcCLB.508173.20  | retrotransposon hot spot protein (RHS, pseudogene), putative  | 1,568 | 1,126E-103 |
| TcCLB.503859.40  | mucin-associated surface protein (MASP), putative             | 1,568 | 0,002016   |
| TcCLB.509281.10  | hypothetical protein                                          | 1,568 | 0,01863    |
| TcCLB.507811.100 | amino acid permease, putative                                 | 1,567 | 3,776E-10  |
| TcCLB.503973.70  | serine-alanine-and proline-rich protein, putative             | 1,567 | 0,0009151  |
| TcCLB.507959.90  | mucin TcMUCII, putative                                       | 1,567 | 0,09488    |
| TcCLB.440101.10  | fatty acid desaturase, putative (fragment)                    | 1,566 | 1,033E-13  |
| TcCLB.508595.50  | cysteine peptidase, putative                                  | 1,565 | 1,206E-61  |
| TcCLB.507065.89  | mucin TcMUC (pseudogene), putative                            | 1,565 | 0,003342   |
| TcCLB.509243.30  | hypothetical protein, conserved                               | 1,564 | 7,495E-23  |
| TcCLB.511385.30  | Pyrophosphate-energized vacuolar membrane proton pump         | 1,563 | 4,21E-78   |
| TcCLB.511751.205 | hypothetical protein                                          | 1,563 | 6,723E-32  |
| TcCLB.507487.20  | mucin-associated surface protein (MASP), putative             | 1,563 | 0,09006    |
| TcCLB.510943.130 | cytochrome c oxidase assembly protein, putative               | 1,562 | 7,294E-33  |
| TcCLB.510181.20  | delta-4 fatty acid desaturase, putative                       | 1,562 | 1,457E-24  |
| TcCLB.506411.30  | proline oxidase, putative                                     | 1,56  | 1,41E-27   |
| TcCLB.507429.3   | mucin-associated surface protein (MASP), putative             | 1,56  | 0,006765   |
| TcCLB.506401.140 | hypothetical protein, conserved                               | 1,557 | 3,803E-07  |
| TcCLB.510773.20  | Pyrophosphate-energized vacuolar membrane proton pump         | 1,556 | 4,471E-71  |
| TcCLB.510889.120 | alanine aminotransferase, putative                            | 1,556 | 5,031E-49  |
| TcCLB.507063.10  | hypothetical protein                                          | 1,555 | 5,547E-23  |
| TcCLB.509401.30  | cysteine peptidase, putative                                  | 1,552 | 6,074E-94  |
| TcCLB.509683.124 | hypothetical protein, conserved                               | 1,552 | 2,168E-53  |
| TcCLB.510557.50  | mucin TcMUCII, putative                                       | 1,552 | 0,0006094  |
| TcCLB.507963.10  | hypothetical protein, conserved                               | 1,551 | 1,886E-21  |
| TcCLB.511217.130 | hypothetical protein, conserved                               | 1,549 | 3,313E-51  |
| TcCLB.510669.40  | hypothetical protein                                          | 1,549 | 7,511E-45  |
| TcCLB.508569.20  | ubiquitin-conjugating enzyme E2, putative                     | 1,549 | 6,129E-36  |
| TcCLB.511837.90  | protein kinase, putative                                      | 1,549 | 5,957E-35  |
| TcCLB.428999.30  | hypothetical protein                                          | 1,549 | 9,68E-24   |
| TcCLB.506773.100 | protein kinase, putative                                      | 1,548 | 2,644E-33  |



|                  |                                                               |       |            |
|------------------|---------------------------------------------------------------|-------|------------|
| TcCLB.509413.10  | hypothetical protein, conserved                               | 1,547 | 5,731E-51  |
| TcCLB.509163.90  | retrotransposon hot spot protein (RHS, pseudogene), putative  | 1,547 | 8,802E-38  |
| TcCLB.506145.24  | hypothetical protein, conserved                               | 1,547 | 1,664E-19  |
| TcCLB.504199.20  | hypothetical protein, conserved                               | 1,546 | 4,746E-39  |
| TcCLB.506129.10  | dispersed gene family protein 1 (DGF-1, pseudogene), putative | 1,546 | 3,872E-07  |
| TcCLB.439307.9   | hypothetical protein, conserved                               | 1,545 | 0,235      |
| TcCLB.504149.100 | hypothetical protein, conserved                               | 1,544 | 2,394E-58  |
| TcCLB.509647.13  | hypothetical protein, conserved (fragment)                    | 1,544 | 1,271E-57  |
| TcCLB.508965.14  | multidrug resistance protein E, putative (MRPE)               | 1,544 | 3,878E-40  |
| TcCLB.510847.40  | retrotransposon hot spot protein (RHS, pseudogene), putative  | 1,544 | 2,234E-22  |
| TcCLB.511109.130 | heterogeneous nuclear ribonucleoprotein H/F, putative         | 1,543 | 2,06E-30   |
| TcCLB.507917.10  | surface protease GP63, putative                               | 1,542 | 6,185E-12  |
| TcCLB.506183.90  | trans-sialidase (pseudogene), putative                        | 1,54  | 2,987E-08  |
| TcCLB.506055.14  | trans-sialidase (pseudogene), putative                        | 1,54  | 0,00003001 |
| TcCLB.507625.10  | retrotransposon hot spot (RHS) protein, putative              | 1,538 | 2,734E-44  |
| TcCLB.511823.14  | hypothetical protein, conserved                               | 1,538 | 2,109E-08  |
| TcCLB.510359.350 | hypothetical protein, conserved                               | 1,537 | 7,537E-45  |
| TcCLB.510941.3   | protein kinase, putative (fragment)                           | 1,537 | 1,532E-33  |
| TcCLB.506773.104 | hypothetical protein, conserved                               | 1,537 | 9,884E-24  |
| TcCLB.506563.220 | calpain-like cysteine peptidase, putative                     | 1,536 | 1,132E-47  |
| TcCLB.457101.30  | multidrug resistance protein E, putative                      | 1,536 | 7,052E-19  |
| TcCLB.507035.11  | trans-sialidase, putative (fragment)                          | 1,536 | 1,323E-06  |
| TcCLB.508219.60  | mucin TcMUCII (pseudogene), putative                          | 1,536 | 0,02552    |
| TcCLB.504769.20  | mucin-associated surface protein (MASP), putative             | 1,535 | 2,775E-09  |
| TcCLB.505373.30  | retrotransposon hot spot protein (RHS, pseudogene), putative  | 1,534 | 2,526E-11  |
| TcCLB.507221.60  | oxidoreductase-like protein (pseudogene), putative            | 1,533 | 1,158E-20  |
| TcCLB.511245.120 | hypothetical protein, conserved                               | 1,533 | 9,539E-20  |
| TcCLB.509489.20  | hypothetical protein, conserved                               | 1,532 | 7,812E-22  |
| TcCLB.508119.120 | GDP-mannose 4,6 dehydratase, putative                         | 1,531 | 2,557E-38  |
| TcCLB.510697.40  | mucin-associated surface protein (MASP), putative             | 1,531 | 0,002815   |
| TcCLB.511149.30  | mucin TcMUCII (pseudogene), putative                          | 1,527 | 0,0167     |
| TcCLB.509419.58  | mucin TcMUCII (pseudogene), putative                          | 1,526 | 0,06904    |
| TcCLB.509601.80  | hypothetical protein, conserved                               | 1,525 | 5,444E-25  |
| TcCLB.509977.90  | hypothetical protein                                          | 1,524 | 5,155E-13  |
| TcCLB.507711.90  | procyclic form surface phosphoprotein, putative               | 1,522 | 3,034E-29  |
| TcCLB.508307.125 | hypothetical protein, conserved                               | 1,522 | 1,573E-15  |
| TcCLB.505047.9   | dispersed gene family protein 1 (DGF-1), putative             | 1,521 | 0,0001417  |
| TcCLB.507609.40  | delta-4 fatty acid desaturase, putative                       | 1,52  | 5,525E-21  |
| TcCLB.506529.610 | hypothetical protein                                          | 1,519 | 4,082E-06  |
| TcCLB.504047.5   | urocanate hydratase, putative (fragment)                      | 1,518 | 0,00117    |
| TcCLB.511259.180 | mucin-associated surface protein (MASP), putative             | 1,518 | 0,09026    |
| TcCLB.509339.10  | hypothetical protein, conserved                               | 1,516 | 7,603E-18  |
| TcCLB.503617.31  | nuclear receptor binding factor, putative                     | 1,515 | 1,599E-31  |
| TcCLB.504219.40  | trans-sialidase (pseudogene), putative                        | 1,514 | 0,00001966 |
| TcCLB.504269.10  | protein kinase (pseudogene), putative                         | 1,513 | 1,098E-28  |

|                  |                                                           |       |           |
|------------------|-----------------------------------------------------------|-------|-----------|
| TcCLB.511807.40  | hypothetical protein, conserved                           | 1,513 | 1,331E-24 |
| TcCLB.504587.30  | mucin-associated surface protein (MASP), putative         | 1,513 | 7,566E-09 |
| TcCLB.504239.280 | 90 kDa surface protein, putative                          | 1,512 | 0,01036   |
| TcCLB.511393.70  | hypothetical protein, conserved                           | 1,511 | 1,575E-36 |
| TcCLB.503597.10  | homoserine kinase, putative                               | 1,511 | 3,723E-31 |
| TcCLB.511909.50  | hypothetical protein, conserved                           | 1,511 | 1,171E-26 |
| TcCLB.507065.150 | mucin TcMUCII, putative                                   | 1,511 | 0,001238  |
| TcCLB.504051.20  | ATP-dependent DNA DEAD/DEAH box helicase, putative        | 1,51  | 4,276E-31 |
| TcCLB.508567.40  | hypothetical protein, conserved                           | 1,509 | 1,098E-28 |
| TcCLB.511545.120 | superoxide dismutase, putative                            | 1,509 | 2,429E-25 |
| TcCLB.508641.160 | glycogenin glucosyltransferase, putative                  | 1,509 | 1,693E-21 |
| TcCLB.506595.140 | hypothetical protein                                      | 1,508 | 2,762E-11 |
| TcCLB.509147.40  | surface antigen TASV, putative                            | 1,507 | 6,542E-15 |
| TcCLB.507085.10  | mucin TcMUCII, putative                                   | 1,507 | 2,457E-06 |
| TcCLB.508435.70  | mucin-associated surface protein (MASP), putative         | 1,507 | 0,01994   |
| TcCLB.506533.142 | mucin TcSMUGL, putative                                   | 1,506 | 9,836E-14 |
| TcCLB.504081.470 | mucin TcMUCII, putative                                   | 1,505 | 0,09897   |
| TcCLB.508973.9   | hypothetical protein, conserved (fragment)                | 1,504 | 3,25E-14  |
| TcCLB.506855.180 | adenylate kinase, putative                                | 1,503 | 1,003E-22 |
| TcCLB.509157.120 | hypothetical protein, conserved                           | 1,503 | 3,839E-19 |
| TcCLB.506471.120 | trans-sialidase, Group II, putative                       | 1,503 | 1,089E-18 |
| TcCLB.506945.20  | PAS-domain containing phosphoglycerate kinase, putative   | 1,502 | 3,659E-45 |
| TcCLB.506829.80  | nicotinamidase, putative (PNC1)                           | 1,502 | 7,911E-22 |
| TcCLB.508113.14  | mucin TcMUC (pseudogene), putative                        | 1,502 | 1,397E-06 |
| TcCLB.511827.90  | hypothetical protein, conserved                           | 1,501 | 2,203E-06 |
| TcCLB.506173.270 | mucin TcMUCII, putative                                   | 1,5   | 0,009803  |
| TcCLB.503705.19  | trans-sialidase, putative                                 | 1,498 | 0,2538    |
| TcCLB.509693.180 | hypothetical protein, conserved                           | 1,497 | 1,318E-12 |
| TcCLB.509849.40  | mannosyl-oligosaccharide 1,2-alpha-mannosidase IB, puta   | 1,497 | 1,807E-08 |
| TcCLB.510853.50  | beta galactofuranosyl glycosyltransferase, putative       | 1,497 | 0,005593  |
| TcCLB.503527.60  | hypothetical protein, conserved                           | 1,496 | 3,425E-19 |
| TcCLB.508501.280 | hypothetical protein, conserved                           | 1,496 | 1,956E-16 |
| TcCLB.503971.50  | hypothetical protein, conserved                           | 1,495 | 2,771E-13 |
| TcCLB.509525.400 | mucin TcMUCII, putative                                   | 1,495 | 0,007868  |
| TcCLB.510591.10  | trans-sialidase (pseudogene), putative                    | 1,495 | 0,04344   |
| TcCLB.509997.40  | hypothetical protein, conserved                           | 1,494 | 5,443E-26 |
| TcCLB.507357.80  | mucin TcMUCII, putative                                   | 1,494 | 0,02722   |
| TcCLB.510101.320 | hypothetical protein                                      | 1,493 | 3,163E-40 |
| TcCLB.506681.40  | hypothetical protein, conserved                           | 1,493 | 1,799E-06 |
| TcCLB.510583.114 | mucin-associated surface protein (MASP, pseudogene), pu   | 1,493 | 0,2741    |
| TcCLB.505919.80  | retrotransposon hot spot (RHS) protein, putative          | 1,491 | 6,267E-32 |
| TcCLB.510579.50  | hypothetical protein, conserved                           | 1,491 | 1,713E-28 |
| TcCLB.506593.10  | hypothetical protein, conserved                           | 1,491 | 1,2E-09   |
| TcCLB.506687.10  | retrotransposon hot spot protein (RHS, pseudogene), putat | 1,49  | 1,926E-26 |
| TcCLB.506321.40  | mucin TcMUCII, putative                                   | 1,49  | 3,74E-11  |

|                  |                                                          |       |            |
|------------------|----------------------------------------------------------|-------|------------|
| TcCLB.510861.110 | hypothetical protein                                     | 1,489 | 6,187E-33  |
| TcCLB.509055.44  | hypothetical protein, conserved                          | 1,489 | 9,907E-21  |
| TcCLB.510359.660 | mucin TcMUCII, putative                                  | 1,489 | 0,009727   |
| TcCLB.508507.59  | NADH dehydrogenase [ubiquinone] iron-sulfur protein 7, m | 1,488 | 2,243E-28  |
| TcCLB.511545.160 | hypothetical protein, conserved                          | 1,487 | 2,388E-14  |
| TcCLB.507429.49  | mucin TcMUCII, putative                                  | 1,487 | 0,0005156  |
| TcCLB.510853.73  | retrotransposon hot spot protein (pseudogene), putative  | 1,486 | 3,595E-59  |
| TcCLB.507089.110 | hypothetical protein, conserved                          | 1,486 | 9,283E-32  |
| TcCLB.508601.50  | NADH dehydrogenase subunit NB6M, putative                | 1,486 | 4,638E-17  |
| TcCLB.503409.20  | hypothetical protein, conserved                          | 1,486 | 7,531E-15  |
| TcCLB.509369.50  | surface protease GP63, putative                          | 1,486 | 0,01817    |
| TcCLB.509807.11  | hypothetical protein, conserved (pseudogene)             | 1,485 | 4,05E-12   |
| TcCLB.509449.5   | receptor-type adenylate cyclase, putative (fragment)     | 1,485 | 0,03042    |
| TcCLB.507081.110 | aminopeptidase P1, putative                              | 1,484 | 3,306E-33  |
| TcCLB.505193.74  | hypothetical protein, conserved                          | 1,484 | 2,156E-26  |
| TcCLB.503487.50  | UDP-Gal or UDP-GlcNAc-dependent glycosyltransferase, pu  | 1,483 | 5,619E-18  |
| TcCLB.504081.440 | 90 kDa surface protein, putative                         | 1,483 | 0,00008699 |
| TcCLB.510795.4   | CLC-type chloride channel protein (pseudogene), putative | 1,483 | 0,004355   |
| TcCLB.508851.189 | phosphoenolpyruvate mutase, putative                     | 1,482 | 1,2E-44    |
| TcCLB.507809.150 | hypothetical protein, conserved                          | 1,482 | 2,206E-21  |
| TcCLB.503653.60  | cytochrome b-domain protein, putative                    | 1,482 | 3,935E-20  |
| TcCLB.507715.10  | cysteine peptidase, Clan CA, family C51, putative        | 1,481 | 2,763E-37  |
| TcCLB.504427.64  | hypothetical protein, conserved                          | 1,481 | 5,872E-22  |
| TcCLB.511621.60  | Asparagine-linked glycosylation protein 12 (ALG12)       | 1,481 | 0,00004853 |
| TcCLB.506133.140 | mucin-associated surface protein (MASP), putative        | 1,481 | 0,001748   |
| TcCLB.503981.30  | hypothetical protein, conserved                          | 1,48  | 6,928E-26  |
| TcCLB.505975.10  | hypothetical protein                                     | 1,48  | 0,07993    |
| TcCLB.510359.20  | paraflagellar rod component, putative                    | 1,479 | 1,022E-07  |
| TcCLB.508495.130 | hypothetical protein                                     | 1,479 | 0,01334    |
| TcCLB.506921.20  | hypothetical protein, conserved                          | 1,478 | 1,462E-26  |
| TcCLB.507699.110 | mucin-associated surface protein (MASP, pseudogene), pu  | 1,477 | 0,001908   |
| TcCLB.511211.70  | cytochrome c oxidase assembly protein (COX15)            | 1,476 | 6,421E-46  |
| TcCLB.505193.90  | hypothetical protein, conserved                          | 1,476 | 2,442E-28  |
| TcCLB.508461.310 | protein kinase A catalytic subunit isoform 1, putative   | 1,476 | 1,048E-24  |
| TcCLB.511763.19  | hypothetical protein, conserved                          | 1,476 | 4,352E-14  |
| TcCLB.507787.50  | membrane transporter protein (pseudogene), putative      | 1,476 | 1,827E-13  |
| TcCLB.507167.200 | beta galactofuranosyl glycosyltransferase, putative      | 1,476 | 0,00005386 |
| TcCLB.511853.10  | mucin TcMUCl, putative                                   | 1,475 | 0,04178    |
| TcCLB.511025.90  | hypothetical protein, conserved                          | 1,474 | 2,111E-16  |
| TcCLB.510025.30  | mucin-associated surface protein (MASP, pseudogene), pu  | 1,474 | 0,02427    |
| TcCLB.509401.20  | cysteine peptidase (pseudogene), putative                | 1,473 | 1,256E-72  |
| TcCLB.510073.17  | cysteine peptidase (C-terminal), putative                | 1,473 | 6,559E-49  |
| TcCLB.509965.330 | hypothetical protein, conserved                          | 1,472 | 9,844E-69  |
| TcCLB.506755.110 | hypothetical protein, conserved                          | 1,471 | 8,573E-36  |
| TcCLB.511011.10  | retrotransposon hot spot (RHS) protein, putative         | 1,471 | 8,587E-28  |

|                  |                                                           |       |            |
|------------------|-----------------------------------------------------------|-------|------------|
| TcCLB.508307.70  | hypothetical protein, conserved                           | 1,471 | 1,322E-25  |
| TcCLB.506951.80  | trans-sialidase, Group V, putative                        | 1,471 | 1,966E-18  |
| TcCLB.508879.20  | hypothetical protein                                      | 1,471 | 1,082E-15  |
| TcCLB.508221.104 | mucin-associated surface protein (MASP), putative         | 1,469 | 0,277      |
| TcCLB.511647.10  | hypothetical protein, conserved                           | 1,468 | 8,285E-51  |
| TcCLB.506297.4   | hypothetical protein, conserved (pseudogene)              | 1,468 | 7,62E-15   |
| TcCLB.510743.30  | hypothetical protein, conserved                           | 1,467 | 1,914E-25  |
| TcCLB.510719.100 | hypothetical protein, conserved                           | 1,467 | 8,107E-12  |
| TcCLB.508761.160 | mucin TcMUCII, putative                                   | 1,467 | 0,001792   |
| TcCLB.509973.80  | hypothetical protein                                      | 1,466 | 0,00004708 |
| TcCLB.510503.100 | surface protease GP63, putative                           | 1,466 | 0,001201   |
| TcCLB.507699.120 | mucin TcMUCII, putative                                   | 1,466 | 0,009131   |
| TcCLB.506955.184 | mucin-associated surface protein (MASP, pseudogene), pu   | 1,465 | 0,003252   |
| TcCLB.511817.180 | histone H2A, putative                                     | 1,464 | 0,003397   |
| TcCLB.506499.70  | mucin TcMUCII, putative                                   | 1,464 | 0,00797    |
| TcCLB.410049.20  | hypothetical protein, conserved                           | 1,463 | 1,035E-09  |
| TcCLB.505807.180 | 2-hydroxy-3-oxopropionate reductase, putative             | 1,462 | 3,109E-49  |
| TcCLB.506407.50  | hypothetical protein, conserved                           | 1,462 | 1,092E-30  |
| TcCLB.506779.110 | phosphatase, putative                                     | 1,461 | 6,792E-40  |
| TcCLB.503781.80  | universal minicircle sequence binding protein 1 (UMSBP1)  | 1,461 | 5,44E-34   |
| TcCLB.470827.10  | retrotransposon hot spot protein (RHS, pseudogene), putat | 1,461 | 1,393E-11  |
| TcCLB.511871.90  | hypothetical protein, conserved                           | 1,46  | 1,805E-34  |
| TcCLB.509769.33  | palmitoyl acyltransferase 12, putative                    | 1,46  | 1,149E-21  |
| TcCLB.510461.30  | mucin-associated surface protein (MASP), putative (fragm  | 1,459 | 0,3438     |
| TcCLB.444777.10  | drug resistance protein, putative                         | 1,458 | 8,85E-07   |
| TcCLB.509233.150 | cytochrome oxidase subunit VII (COXVII)                   | 1,457 | 1,224E-53  |
| TcCLB.506325.40  | retrotransposon hot spot protein (RHS, pseudogene), putat | 1,456 | 1,164E-41  |
| TcCLB.508451.30  | retrotransposon hot spot protein (RHS, pseudogene), putat | 1,456 | 2,839E-07  |
| TcCLB.510349.30  | phosphatidylinositol-4-phosphate 5-kinase, putative       | 1,455 | 2,798E-25  |
| TcCLB.510967.20  | hypothetical protein, conserved                           | 1,455 | 8,607E-11  |
| TcCLB.510759.140 | hypothetical protein, conserved                           | 1,454 | 1,816E-34  |
| TcCLB.508671.10  | serine carboxypeptidase (CBP1), putative                  | 1,454 | 1,375E-29  |
| TcCLB.508207.74  | Adenine phosphoribosyltransferase, putative               | 1,454 | 3,072E-20  |
| TcCLB.504139.10  | retrotransposon hot spot protein (RHS, pseudogene), putat | 1,452 | 5,162E-11  |
| TcCLB.511819.40  | hypothetical protein, conserved                           | 1,451 | 5,627E-30  |
| TcCLB.510203.34  | mucin-associated surface protein (MASP, pseudogene), pu   | 1,451 | 0,0001735  |
| TcCLB.508817.130 | carbonic anhydrase-like protein, putative                 | 1,45  | 7,712E-59  |
| TcCLB.506281.134 | mucin-associated surface protein (MASP), putative         | 1,45  | 0,1049     |
| TcCLB.507477.5   | trans-sialidase, putative                                 | 1,45  | 0,3372     |
| TcCLB.506513.190 | NADH-ubiquinone oxidoreductase, mitochondrial, putative   | 1,449 | 1,236E-20  |
| TcCLB.511859.120 | mucin-like glycoprotein, putative                         | 1,449 | 8,941E-12  |
| TcCLB.510693.19  | mucin-associated surface protein (MASP, pseudogene), pu   | 1,449 | 0,00003952 |
| TcCLB.511725.170 | hypothetical protein, conserved                           | 1,448 | 2,64E-29   |
| TcCLB.508417.29  | dispersed gene family protein 1 (DGF-1), putative (fragme | 1,447 | 9,15E-18   |
| TcCLB.511613.80  | mucin-associated surface protein (MASP), putative         | 1,447 | 0,002219   |

|                  |                                                               |       |            |
|------------------|---------------------------------------------------------------|-------|------------|
| TcCLB.508909.90  | Protein kinase domain, putative                               | 1,446 | 1,112E-35  |
| TcCLB.506741.110 | mucin TcMUCII, putative                                       | 1,446 | 2,778E-10  |
| TcCLB.506221.70  | Paraflagellar Rod Proteome Component 9, putative (PFC9)       | 1,445 | 9,185E-14  |
| TcCLB.508389.138 | mucin TcMUCII, putative                                       | 1,445 | 0,07303    |
| TcCLB.508401.20  | retrotransposon hot spot (RHS) protein, putative              | 1,444 | 2,462E-39  |
| TcCLB.506297.260 | lanosterol 14-alpha-demethylase, putative (CYP51)             | 1,443 | 2,295E-63  |
| TcCLB.511827.64  | hypothetical protein, conserved                               | 1,443 | 3,743E-32  |
| TcCLB.510345.40  | hypothetical protein, conserved                               | 1,443 | 1,177E-29  |
| TcCLB.507067.60  | mucin-associated surface protein (MASP), putative             | 1,443 | 0,01155    |
| TcCLB.508125.100 | mucin TcMUCII, putative                                       | 1,443 | 0,3475     |
| TcCLB.510149.150 | NADH-ubiquinone oxidoreductase complex I subunit, putative    | 1,44  | 5,404E-18  |
| TcCLB.509973.10  | mucin-associated surface protein (MASP), putative             | 1,44  | 8,255E-16  |
| TcCLB.506775.190 | serine/threonine protein kinase, putative                     | 1,439 | 4,205E-15  |
| TcCLB.508495.210 | mucin-associated surface protein (MASP, pseudogene), putative | 1,439 | 0,002989   |
| TcCLB.503753.29  | NADPH--cytochrome P450 reductase, putative                    | 1,438 | 2,198E-28  |
| TcCLB.507225.10  | retrotransposon hot spot (RHS) protein, putative              | 1,437 | 7,943E-43  |
| TcCLB.509849.10  | ammonium transporter, putative                                | 1,437 | 1,435E-19  |
| TcCLB.509977.40  | hypothetical protein                                          | 1,437 | 4,482E-07  |
| TcCLB.504039.180 | mucin-associated surface protein (MASP), putative             | 1,437 | 0,00000578 |
| TcCLB.509725.80  | retrotransposon hot spot protein (RHS, pseudogene), putative  | 1,436 | 1,064E-52  |
| TcCLB.508495.70  | mucin TcMUCII, putative                                       | 1,436 | 2,245E-07  |
| TcCLB.510359.540 | hypothetical protein                                          | 1,436 | 0,06193    |
| TcCLB.508113.7   | trans-sialidase (pseudogene), putative                        | 1,435 | 1,303E-07  |
| TcCLB.483623.10  | hypothetical protein, conserved                               | 1,434 | 1,11E-11   |
| TcCLB.508693.199 | hypothetical protein, conserved                               | 1,433 | 3,525E-20  |
| TcCLB.507639.30  | universal minicircle sequence binding protein 1 (pdz5)        | 1,432 | 1,147E-18  |
| TcCLB.507023.70  | hypothetical protein, conserved                               | 1,432 | 4,556E-11  |
| TcCLB.510789.10  | mucin TcMUCII, putative                                       | 1,432 | 0,00004288 |
| TcCLB.506909.20  | mucin TcMUCI, putative                                        | 1,432 | 0,001744   |
| TcCLB.510279.140 | mucin-associated surface protein (MASP), putative             | 1,432 | 0,004541   |
| TcCLB.506401.110 | protein kinase, putative                                      | 1,431 | 4,109E-68  |
| TcCLB.506993.86  | mucin-associated surface protein (MASP, pseudogene), putative | 1,431 | 0,001095   |
| TcCLB.506337.160 | NADH-ubiquinone oxidoreductase complex I subunit, putative    | 1,43  | 6,185E-28  |
| TcCLB.508023.50  | hypothetical protein                                          | 1,43  | 1,426E-06  |
| TcCLB.510013.270 | trans-sialidase (pseudogene), putative                        | 1,43  | 7,662E-06  |
| TcCLB.510305.79  | hypothetical protein, conserved                               | 1,429 | 4,197E-59  |
| TcCLB.508671.20  | serine carboxypeptidase (CBP1), putative                      | 1,429 | 5,826E-34  |
| TcCLB.503521.50  | UTP-glucose-1-phosphate uridylyltransferase 2, putative       | 1,428 | 6,286E-23  |
| TcCLB.507475.30  | retrotransposon hot spot protein (RHS, pseudogene), putative  | 1,428 | 8,922E-17  |
| TcCLB.503653.20  | hypothetical protein, conserved                               | 1,428 | 1,236E-12  |
| TcCLB.509961.51  | tryptophanyl-tRNA synthetase (pseudogene), putative           | 1,428 | 0,00008804 |
| TcCLB.511585.260 | dispersed gene family protein 1 (DGF-1, pseudogene), putative | 1,427 | 5,879E-13  |
| TcCLB.509699.30  | mucin TcMUCII (pseudogene), putative                          | 1,427 | 0,03861    |
| TcCLB.507739.59  | hypothetical protein, conserved                               | 1,426 | 3,463E-10  |
| TcCLB.507693.10  | dispersed gene family protein 1 (DGF-1), putative             | 1,426 | 4,217E-07  |

|                  |                                                             |       |            |
|------------------|-------------------------------------------------------------|-------|------------|
| TcCLB.507163.60  | hypothetical protein                                        | 1,426 | 0,002984   |
| TcCLB.510101.350 | hypothetical protein, conserved                             | 1,425 | 4,614E-73  |
| TcCLB.510535.90  | hypothetical protein, conserved                             | 1,425 | 0,0001701  |
| TcCLB.509463.30  | 3-ketoacyl-CoA thiolase, putative                           | 1,424 | 9,753E-68  |
| TcCLB.509921.20  | trans-sialidase (pseudogene), putative                      | 1,424 | 7,974E-08  |
| TcCLB.511815.170 | hypothetical protein, conserved                             | 1,423 | 8,607E-34  |
| TcCLB.511395.20  | phosphatidylglycerolphosphate synthase, mitochondrial, pu   | 1,423 | 3E-30      |
| TcCLB.503643.30  | hypothetical protein, conserved                             | 1,423 | 1,299E-21  |
| TcCLB.510343.5   | hypothetical protein, conserved (fragment)                  | 1,423 | 1,153E-14  |
| TcCLB.510513.10  | mannosyl-oligosaccharide 1,2-alpha-mannosidase IB, puta     | 1,422 | 7,298E-25  |
| TcCLB.508973.69  | hypothetical protein, conserved                             | 1,422 | 1,491E-14  |
| TcCLB.506183.9   | pyruvate dehydrogenase (lipoamide) kinase, putative (frag   | 1,422 | 2,056E-13  |
| TcCLB.510795.30  | fatty acid desaturase (pseudogene), putative                | 1,421 | 8,066E-27  |
| TcCLB.506501.190 | mucin TcMUCII, putative                                     | 1,421 | 0,03885    |
| TcCLB.506775.100 | DNA repair and recombination helicase protein PIF2, putat   | 1,42  | 1,254E-22  |
| TcCLB.507875.110 | retrotransposon hot spot protein (RHS, pseudogene), putat   | 1,42  | 3,294E-20  |
| TcCLB.509843.20  | trans-sialidase, Group VII, putative                        | 1,419 | 3,191E-43  |
| TcCLB.511129.40  | trans-sialidase, Group III, putative                        | 1,419 | 0,2118     |
| TcCLB.509179.10  | choline/carnitine O-acyltransferase (pseudogene), putative  | 1,418 | 1,978E-09  |
| TcCLB.509331.189 | hypothetical protein, conserved                             | 1,417 | 1,834E-21  |
| TcCLB.511911.60  | trans-sialidase, Group III, putative                        | 1,417 | 0,1034     |
| TcCLB.511817.120 | hypothetical protein, conserved                             | 1,416 | 2,31E-35   |
| TcCLB.510201.5   | mucin-associated surface protein (MASP), putative           | 1,416 | 0,2782     |
| TcCLB.509331.200 | ABC transporter, putative                                   | 1,415 | 5,044E-21  |
| TcCLB.508355.127 | hypothetical protein, conserved                             | 1,414 | 7,679E-28  |
| TcCLB.506271.30  | retrotransposon hot spot (RHS) protein, putative (fragment) | 1,414 | 2,851E-06  |
| TcCLB.510099.120 | D-isomer specific 2-hydroxyacid dehydrogenase-protein, pu   | 1,413 | 1,316E-122 |
| TcCLB.508741.160 | hypothetical protein, conserved                             | 1,413 | 6,683E-38  |
| TcCLB.506299.9   | dispersed gene family protein 1 (DGF-1), putative (fragme   | 1,413 | 3,143E-11  |
| TcCLB.510377.210 | trans-sialidase (pseudogene), putative                      | 1,413 | 0,008183   |
| TcCLB.507237.20  | mucin-associated surface protein (MASP), putative           | 1,413 | 0,04037    |
| TcCLB.503865.60  | hypothetical protein, conserved                             | 1,412 | 7,272E-34  |
| TcCLB.454787.10  | mucin TcMUC, putative                                       | 1,412 | 0,3926     |
| TcCLB.511599.30  | 90 kDa surface protein, putative                            | 1,411 | 0,2018     |
| TcCLB.508499.10  | mucin TcMUCII, putative                                     | 1,41  | 0,00003349 |
| TcCLB.503987.30  | Enriched in surface-labeled proteome protein 16 (ESP16)     | 1,409 | 5,64E-25   |
| TcCLB.510993.10  | (H)-ATPase G subunit                                        | 1,408 | 5,359E-31  |
| TcCLB.511573.49  | hypothetical protein                                        | 1,407 | 1,449E-23  |
| TcCLB.510079.10  | retrotransposon hot spot protein (RHS, pseudogene), putat   | 1,407 | 8,999E-23  |
| TcCLB.509331.180 | aldose 1-epimerase-like protein, putative                   | 1,407 | 2,894E-18  |
| TcCLB.511825.30  | hypothetical protein, conserved                             | 1,407 | 5,619E-18  |
| TcCLB.511781.31  | trans-sialidase (pseudogene), putative                      | 1,407 | 0,3917     |
| TcCLB.503519.30  | mucin-associated surface protein (MASP), putative           | 1,406 | 0,0001456  |
| TcCLB.506859.240 | hypothetical protein, conserved                             | 1,406 | 0,000266   |
| TcCLB.510423.50  | hypothetical protein, conserved                             | 1,405 | 2,315E-28  |

|                  |                                                           |       |            |
|------------------|-----------------------------------------------------------|-------|------------|
| TcCLB.509213.100 | 3-ketoacyl-CoA reductase, putative                        | 1,404 | 2,817E-35  |
| TcCLB.510265.4   | hypothetical protein, conserved                           | 1,404 | 4,295E-07  |
| TcCLB.508501.140 | mucin TcMUCII, putative                                   | 1,404 | 0,00001219 |
| TcCLB.507737.40  | hypothetical protein, conserved (fragment)                | 1,404 | 0,01083    |
| TcCLB.511331.10  | calpain cysteine peptidase, putative (fragment)           | 1,403 | 0,01736    |
| TcCLB.511843.80  | retrotransposon hot spot (RHS) protein, putative          | 1,402 | 2,5E-13    |
| TcCLB.506457.140 | hypothetical protein, conserved                           | 1,401 | 2,554E-09  |
| TcCLB.509331.30  | acetyl-CoA synthetase, putative                           | 1,4   | 2,407E-27  |
| TcCLB.507645.11  | hypothetical protein, conserved (fragment)                | 1,4   | 1,159E-09  |
| TcCLB.508493.100 | mucin TcMUCII, putative                                   | 1,4   | 7,139E-06  |
| TcCLB.506331.130 | trans-sialidase, Group II, putative                       | 1,4   | 0,0004584  |
| TcCLB.506285.50  | mucin TcMUCII, putative                                   | 1,4   | 0,001009   |
| TcCLB.510377.190 | mucin TcMUCII, putative                                   | 1,4   | 0,003857   |
| TcCLB.511121.30  | hypothetical protein                                      | 1,4   | 0,05877    |
| TcCLB.507847.30  | mucin TcMUCII (pseudogene), putative                      | 1,397 | 0,006915   |
| TcCLB.506675.30  | retrotransposon hot spot protein (RHS, pseudogene), putat | 1,396 | 7,02E-30   |
| TcCLB.506961.130 | retrotransposon hot spot protein (RHS, pseudogene), putat | 1,396 | 4,026E-28  |
| TcCLB.508043.20  | metallo-beta-lactamase-like protein, putative             | 1,395 | 2,802E-26  |
| TcCLB.511669.10  | trans-sialidase, Group VIII, putative                     | 1,394 | 8,579E-15  |
| TcCLB.509973.25  | mucin TcMUC (pseudogene), putative                        | 1,394 | 0,00001552 |
| TcCLB.508017.10  | hypothetical protein, conserved                           | 1,394 | 0,002514   |
| TcCLB.508777.110 | hypothetical protein, conserved                           | 1,393 | 2,045E-35  |
| TcCLB.510855.20  | hypothetical protein, conserved                           | 1,393 | 3,913E-20  |
| TcCLB.510131.40  | haloacid dehalogenase-like hydrolase, putative            | 1,393 | 2,027E-17  |
| TcCLB.503779.109 | hypothetical protein, conserved (fragment)                | 1,393 | 7,14E-16   |
| TcCLB.509535.9   | electron transport protein SCO1/SCO2, putative            | 1,393 | 2,024E-12  |
| TcCLB.506219.40  | hypothetical protein, conserved                           | 1,392 | 1,589E-59  |
| TcCLB.508677.150 | glycosyl transferase, putative                            | 1,392 | 2,295E-52  |
| TcCLB.511817.260 | hypothetical protein, conserved                           | 1,392 | 9,233E-48  |
| TcCLB.509961.20  | dispersed gene family protein 1 (DGF-1), putative         | 1,392 | 0,007968   |
| TcCLB.508225.4   | trans-sialidase, putative                                 | 1,391 | 0,004822   |
| TcCLB.511809.120 | hypothetical protein, conserved                           | 1,388 | 6,725E-43  |
| TcCLB.503607.4   | retrotransposon hot spot (RHS) protein, putative          | 1,388 | 6,999E-21  |
| TcCLB.509967.140 | hypothetical protein, conserved                           | 1,388 | 1,334E-14  |
| TcCLB.507699.64  | mucin TcMUCII, putative                                   | 1,387 | 0,02247    |
| TcCLB.503823.40  | glycosyl hydrolase-like protein, putative                 | 1,385 | 3,452E-41  |
| TcCLB.510819.119 | zinc finger (CCCH type) protein, putative                 | 1,385 | 8,737E-29  |
| TcCLB.509797.30  | hypothetical protein, conserved                           | 1,385 | 2,329E-24  |
| TcCLB.506577.120 | sterol C-24 reductase, putative                           | 1,385 | 2,176E-16  |
| TcCLB.460127.30  | amino acid permease, putative                             | 1,385 | 4,781E-07  |
| TcCLB.504031.11  | hypothetical protein                                      | 1,385 | 0,0008403  |
| TcCLB.509765.20  | retrotransposon hot spot protein (RHS, pseudogene), putat | 1,384 | 0,0001364  |
| TcCLB.510021.140 | mucin TcMUCII (pseudogene), putative                      | 1,384 | 0,001726   |
| TcCLB.506823.20  | retrotransposon hot spot protein (RHS, pseudogene), putat | 1,382 | 6,081E-10  |
| TcCLB.508799.240 | aminopeptidase, putative                                  | 1,381 | 3,104E-54  |

|                  |                                                           |       |           |
|------------------|-----------------------------------------------------------|-------|-----------|
| TcCLB.511861.120 | surface antigen TASV, putative                            | 1,381 | 5,544E-11 |
| TcCLB.508741.140 | imidazolonepropionase, putative                           | 1,38  | 9,248E-44 |
| TcCLB.511809.40  | hypothetical protein, conserved                           | 1,38  | 2,77E-18  |
| TcCLB.510861.50  | hypothetical protein, conserved                           | 1,38  | 0,0001774 |
| TcCLB.511391.160 | cytochrome c1, heme protein, mitochondrial, putative (CYC | 1,379 | 2,569E-68 |
| TcCLB.510759.40  | Protein kinase domain, putative                           | 1,379 | 5,569E-31 |
| TcCLB.506931.80  | p450 reductase, putative                                  | 1,379 | 7,643E-29 |
| TcCLB.510883.10  | retrotransposon hot spot (RHS) protein, putative          | 1,379 | 3,106E-17 |
| TcCLB.511821.40  | hypothetical protein, conserved                           | 1,379 | 6,259E-13 |
| TcCLB.509025.20  | hypothetical protein, conserved                           | 1,379 | 7,655E-09 |
| TcCLB.506777.110 | hypothetical protein, conserved                           | 1,377 | 2,54E-33  |
| TcCLB.504107.10  | calpain-like cysteine peptidase, putative (fragment)      | 1,376 | 0,03135   |
| TcCLB.506005.10  | dispersed gene family protein 1 (DGF-1, pseudogene), puta | 1,375 | 5,193E-20 |
| TcCLB.506435.424 | hypothetical protein, conserved                           | 1,375 | 7,278E-11 |
| TcCLB.508495.200 | mucin TcMUCII, putative                                   | 1,375 | 1,57E-10  |
| TcCLB.401569.10  | trans-sialidase, putative                                 | 1,375 | 0,0006766 |
| TcCLB.506059.10  | trans-sialidase, putative                                 | 1,375 | 0,0007609 |
| TcCLB.506823.80  | retrotransposon hot spot protein (RHS, pseudogene), putat | 1,374 | 2,853E-16 |
| TcCLB.505919.11  | mucin-associated surface protein (MASP, pseudogene), pu   | 1,373 | 3,137E-23 |
| TcCLB.510279.180 | mucin TcMUCII (pseudogene), putative                      | 1,373 | 0,04372   |
| TcCLB.506501.80  | mucin-associated surface protein (MASP, pseudogene), pu   | 1,372 | 0,000097  |
| TcCLB.507757.30  | hypothetical protein, conserved                           | 1,371 | 2,678E-14 |
| TcCLB.510279.120 | mucin-associated surface protein (MASP), putative         | 1,371 | 0,03408   |
| TcCLB.506263.20  | D-isomer specific 2-hydroxyacid dehydrogenase-protein, pu | 1,37  | 1,01E-45  |
| TcCLB.510349.10  | hypothetical protein, conserved                           | 1,37  | 7,251E-19 |
| TcCLB.509545.79  | mucin-associated surface protein (MASP), putative         | 1,37  | 0,02527   |
| TcCLB.511375.30  | hypothetical protein (fragment)                           | 1,369 | 0,02835   |
| TcCLB.399997.10  | retrotransposon hot spot (RHS) protein, putative          | 1,368 | 2,676E-23 |
| TcCLB.508499.20  | mucin-associated surface protein (MASP), putative         | 1,368 | 3,417E-06 |
| TcCLB.506157.30  | retrotransposon hot spot protein (RHS, pseudogene), putat | 1,365 | 2,754E-15 |
| TcCLB.508069.10  | retrotransposon hot spot protein (RHS, pseudogene), putat | 1,365 | 1,672E-10 |
| TcCLB.511607.60  | trans-sialidase (pseudogene), putative                    | 1,365 | 6,256E-09 |
| TcCLB.508493.70  | hypothetical protein                                      | 1,365 | 0,00432   |
| TcCLB.510961.40  | mucin TcMUCII, putative                                   | 1,365 | 0,02808   |
| TcCLB.511607.30  | mucin TcMUCII, putative                                   | 1,365 | 0,07614   |
| TcCLB.508221.790 | trans-sialidase, Group V, putative                        | 1,364 | 0,006021  |
| TcCLB.511909.60  | hypothetical protein, conserved                           | 1,363 | 1,054E-16 |
| TcCLB.452475.10  | trans-sialidase, Group V, putative                        | 1,363 | 0,001126  |
| TcCLB.508443.30  | hypothetical protein, conserved                           | 1,362 | 1,959E-44 |
| TcCLB.506477.10  | cytochrome c oxidase assembly factor, putative            | 1,361 | 3,029E-19 |
| TcCLB.504071.110 | ama1 protein, putative                                    | 1,361 | 1,403E-13 |
| TcCLB.510265.10  | quinone oxidoreductase, putative                          | 1,36  | 1,76E-23  |
| TcCLB.511727.220 | hypothetical protein, conserved                           | 1,36  | 1,281E-19 |
| TcCLB.509387.10  | trans-sialidase, Group VIII, putative                     | 1,36  | 6,418E-18 |
| TcCLB.509965.144 | hypothetical protein, conserved                           | 1,359 | 4,077E-16 |



|                  |                                                               |       |            |
|------------------|---------------------------------------------------------------|-------|------------|
| TcCLB.510377.10  | trans-sialidase, Group V, putative                            | 1,359 | 0,0009629  |
| TcCLB.508677.30  | trans-sialidase (pseudogene), putative                        | 1,358 | 4,324E-11  |
| TcCLB.509281.30  | hypothetical protein                                          | 1,358 | 1,358E-09  |
| TcCLB.508799.160 | cytochrome b5-like protein, putative                          | 1,357 | 2,415E-42  |
| TcCLB.511079.71  | mucin TcMUC (pseudogene), putative                            | 1,356 | 0,004355   |
| TcCLB.508119.144 | ribosomal protein L38, putative                               | 1,355 | 4,816E-32  |
| TcCLB.506585.70  | p450 reductase, putative                                      | 1,354 | 1,245E-56  |
| TcCLB.506521.9   | dispersed gene family protein 1 (DGF-1), putative             | 1,354 | 4,655E-16  |
| TcCLB.510025.50  | trans-sialidase, Group V, putative                            | 1,353 | 3,514E-10  |
| TcCLB.508903.100 | ATPase, putative                                              | 1,353 | 3,794E-07  |
| TcCLB.511797.130 | mucin TcMUCII (pseudogene), putative                          | 1,353 | 4,903E-06  |
| TcCLB.403031.10  | trans-sialidase, putative (fragment)                          | 1,353 | 0,3862     |
| TcCLB.506865.2   | nucleoside phosphorylase, putative                            | 1,352 | 8,833E-15  |
| TcCLB.506187.20  | trans-sialidase, Group V, putative                            | 1,351 | 2,12E-10   |
| TcCLB.507427.20  | dispersed gene family protein 1 (DGF-1, pseudogene), putative | 1,351 | 0,00000292 |
| TcCLB.505843.49  | ERV/ALR sulfhydryl oxidase domain-containing protein (PC      | 1,35  | 3,142E-06  |
| TcCLB.507699.90  | mucin TcMUCII, putative                                       | 1,35  | 0,0002429  |
| TcCLB.503519.20  | mucin TcMUCII, putative                                       | 1,35  | 0,009631   |
| TcCLB.507179.7   | trans-sialidase (pseudogene), putative                        | 1,349 | 3,069E-11  |
| TcCLB.510583.40  | mucin TcMUCII, putative                                       | 1,349 | 0,06354    |
| TcCLB.510879.170 | hypothetical protein, conserved                               | 1,348 | 1,262E-14  |
| TcCLB.510115.70  | trans-sialidase, putative                                     | 1,348 | 0,001291   |
| TcCLB.508449.31  | trans-sialidase, putative                                     | 1,348 | 0,02539    |
| TcCLB.507085.30  | trans-sialidase, Group I, putative                            | 1,347 | 3,626E-16  |
| TcCLB.509665.10  | hypothetical protein                                          | 1,347 | 0,06049    |
| TcCLB.506767.130 | mucin TcMUCII, putative                                       | 1,347 | 0,296      |
| TcCLB.509477.10  | mucin-associated surface protein (MASP), putative             | 1,347 | 0,3921     |
| TcCLB.504769.140 | trans-sialidase, Group VIII, putative                         | 1,346 | 0,0001969  |
| TcCLB.504093.10  | hypothetical protein, conserved (pseudogene)                  | 1,345 | 1,179E-25  |
| TcCLB.511511.40  | hypothetical protein, conserved                               | 1,345 | 4,294E-25  |
| TcCLB.510151.19  | fatty acyl CoA synthetase 1, putative                         | 1,345 | 1,16E-14   |
| TcCLB.511127.270 | ankyrin repeat protein, putative                              | 1,345 | 5,494E-10  |
| TcCLB.509079.10  | surface protease GP63 (pseudogene), putative                  | 1,344 | 0,05261    |
| TcCLB.507981.40  | hypothetical protein                                          | 1,344 | 0,3487     |
| TcCLB.441241.10  | microtubule-associated protein Gb4, putative (fragment)       | 1,343 | 2,021E-22  |
| TcCLB.506369.20  | transporter, putative                                         | 1,343 | 2,494E-10  |
| TcCLB.506631.30  | hypothetical protein, conserved                               | 1,342 | 3,606E-23  |
| TcCLB.511019.84  | GDP-mannose 4,6 dehydratase, putative                         | 1,342 | 2,144E-17  |
| TcCLB.508873.25  | hypothetical protein                                          | 1,342 | 0,004605   |
| TcCLB.509151.70  | hypothetical protein, conserved                               | 1,34  | 5,969E-39  |
| TcCLB.506615.29  | mucin-associated surface protein (MASP, pseudogene), pu       | 1,34  | 9,012E-14  |
| TcCLB.509915.50  | trans-sialidase (pseudogene), putative                        | 1,34  | 0,03926    |
| TcCLB.511751.150 | hypothetical protein, conserved                               | 1,339 | 2,367E-11  |
| TcCLB.511203.5   | hypothetical protein, conserved                               | 1,339 | 0,002559   |
| TcCLB.510013.260 | mucin-associated surface protein (MASP), putative             | 1,339 | 0,02865    |

|                  |                                                           |       |           |
|------------------|-----------------------------------------------------------|-------|-----------|
| TcCLB.511655.40  | hypothetical protein, conserved                           | 1,338 | 5,419E-21 |
| TcCLB.506989.220 | hypothetical protein, conserved                           | 1,337 | 4,428E-22 |
| TcCLB.507021.110 | phosphopantothencycysteine decarboxylase, putative (PPC)  | 1,337 | 9,836E-22 |
| TcCLB.510671.10  | dispersed gene family protein 1 (DGF-1), putative         | 1,336 | 1,922E-11 |
| TcCLB.503633.30  | surface protease GP63, putative                           | 1,336 | 0,01197   |
| TcCLB.508071.20  | trans-sialidase (pseudogene), putative                    | 1,336 | 0,04692   |
| TcCLB.506999.180 | hypothetical protein                                      | 1,334 | 1,356E-37 |
| TcCLB.510523.20  | hypothetical protein, conserved                           | 1,334 | 6,653E-13 |
| TcCLB.508269.40  | hypothetical protein, conserved                           | 1,334 | 8,118E-12 |
| TcCLB.506063.20  | retrotransposon hot spot protein (RHS, pseudogene), putat | 1,334 | 2,051E-10 |
| TcCLB.459199.10  | retrotransposon hot spot (RHS) protein, putative          | 1,333 | 4,47E-63  |
| TcCLB.510715.120 | mucin TcMUCII, putative                                   | 1,333 | 0,00281   |
| TcCLB.506593.50  | hypothetical protein, conserved                           | 1,332 | 4,746E-20 |
| TcCLB.508163.234 | trans-sialidase, putative                                 | 1,331 | 0,0021    |
| TcCLB.508267.20  | hypothetical protein, conserved                           | 1,33  | 5,913E-34 |
| TcCLB.508687.20  | retrotransposon hot spot protein (RHS, pseudogene), putat | 1,33  | 2,697E-14 |
| TcCLB.508593.130 | hypothetical protein, conserved                           | 1,329 | 5,854E-31 |
| TcCLB.506583.70  | cytosolic factor SEC14, putative                          | 1,329 | 2,148E-15 |
| TcCLB.510933.120 | surface protease GP63, putative                           | 1,329 | 8,866E-07 |
| TcCLB.511117.60  | mucin-associated surface protein (MASP, pseudogene), pu   | 1,329 | 0,004757  |
| TcCLB.508079.10  | conserved protein                                         | 1,328 | 2,536E-50 |
| TcCLB.508173.10  | retrotransposon hot spot protein (RHS, pseudogene), putat | 1,328 | 1,009E-48 |
| TcCLB.510769.60  | hypothetical protein, conserved (pseudogene)              | 1,328 | 4,591E-25 |
| TcCLB.509869.10  | mucin TcMUCI, putative                                    | 1,328 | 0,01037   |
| TcCLB.506777.40  | hypothetical protein, conserved                           | 1,327 | 2,126E-28 |
| TcCLB.504479.10  | trans-sialidase, Group II, putative                       | 1,327 | 5,171E-15 |
| TcCLB.506761.54  | mucin-associated surface protein (MASP, pseudogene), pu   | 1,327 | 0,01203   |
| TcCLB.506287.100 | hypothetical protein, conserved                           | 1,326 | 1,835E-16 |
| TcCLB.424123.20  | paraflagellar rod component, putative (PFC16)             | 1,326 | 1,357E-11 |
| TcCLB.508229.30  | mucin-associated surface protein (MASP), putative         | 1,326 | 0,004976  |
| TcCLB.508389.50  | mucin-associated surface protein (MASP), putative         | 1,326 | 0,008592  |
| TcCLB.508515.90  | hypothetical protein, conserved                           | 1,325 | 3,473E-10 |
| TcCLB.510979.60  | mucin TcMUCII, putative                                   | 1,325 | 0,01329   |
| TcCLB.506459.60  | retrotransposon hot spot protein (RHS, pseudogene), putat | 1,323 | 1,182E-18 |
| TcCLB.503477.10  | hypothetical protein, conserved                           | 1,323 | 3,127E-14 |
| TcCLB.506469.30  | protein kinase, putative                                  | 1,323 | 1,525E-09 |
| TcCLB.509725.113 | ATP-dependent DEAD/H RNA helicase (pseudogene), putat     | 1,323 | 0,001162  |
| TcCLB.506423.20  | mucin TcMUCII, putative                                   | 1,323 | 0,2226    |
| TcCLB.504533.40  | trans-sialidase, Group IV, putative                       | 1,322 | 1,793E-29 |
| TcCLB.510021.150 | hypothetical protein, conserved (pseudogene)              | 1,322 | 0,0001239 |
| TcCLB.511613.50  | mucin TcMUCII, putative                                   | 1,322 | 0,006495  |
| TcCLB.506015.50  | hypothetical protein (pseudogene)                         | 1,322 | 0,01342   |
| TcCLB.507031.100 | hypothetical protein, conserved                           | 1,321 | 1,551E-16 |
| TcCLB.509533.10  | trans-sialidase, Group II, putative                       | 1,321 | 1,096E-11 |
| TcCLB.504149.160 | phosphoinositide-specific phospholipase C, putative       | 1,32  | 7,627E-45 |

|                  |                                                             |       |            |
|------------------|-------------------------------------------------------------|-------|------------|
| TcCLB.508173.40  | mercaptopyruvate sulfurtransferase, putative (MST)          | 1,319 | 1,862E-27  |
| TcCLB.503411.20  | hypothetical protein, conserved                             | 1,319 | 1,137E-18  |
| TcCLB.510089.60  | hypothetical protein, conserved                             | 1,319 | 1,669E-12  |
| TcCLB.508851.120 | ADP-ribosylation factor GTPase activating protein, putative | 1,317 | 1,609E-20  |
| TcCLB.507089.210 | hypothetical protein, conserved                             | 1,316 | 3,193E-26  |
| TcCLB.509495.30  | trans-sialidase, Group I, putative                          | 1,316 | 1,102E-14  |
| TcCLB.506327.99  | serine/threonine protein kinase, putative (fragment)        | 1,315 | 3,175E-20  |
| TcCLB.509109.120 | protein tyrosine phosphatase, putative                      | 1,314 | 8,935E-20  |
| TcCLB.507765.149 | hypothetical protein, conserved                             | 1,314 | 1,838E-16  |
| TcCLB.511257.100 | surface protease GP63, putative                             | 1,313 | 1,89E-13   |
| TcCLB.503991.20  | Xaa-Pro aminopeptidase, putative                            | 1,312 | 3,86E-29   |
| TcCLB.507953.180 | mucin TcMUCII, putative                                     | 1,312 | 0,01154    |
| TcCLB.507587.50  | hypothetical protein                                        | 1,312 | 0,06891    |
| TcCLB.506779.100 | RNA-binding protein, putative                               | 1,311 | 2,499E-14  |
| TcCLB.504039.230 | mucin-associated surface protein (MASP), putative           | 1,311 | 0,0008225  |
| TcCLB.506857.20  | pyrroline-5-carboxylate reductase, putative (P5CR)          | 1,31  | 2,672E-25  |
| TcCLB.509259.180 | retrotransposon hot spot (RHS) protein, putative            | 1,31  | 4,075E-23  |
| TcCLB.510525.139 | protein kinase, putative                                    | 1,31  | 8,335E-09  |
| TcCLB.506529.70  | hypothetical protein, conserved                             | 1,309 | 1,009E-19  |
| TcCLB.510325.40  | acyltransferase, putative                                   | 1,309 | 7,708E-18  |
| TcCLB.506331.90  | trans-sialidase, Group II, putative                         | 1,309 | 0,00001329 |
| TcCLB.503889.10  | mucin TcMUCII, putative                                     | 1,309 | 0,000023   |
| TcCLB.503553.10  | trans-sialidase (pseudogene), putative                      | 1,309 | 0,02092    |
| TcCLB.506779.160 | palmitoyl acyltransferase 9, putative                       | 1,308 | 1,246E-23  |
| TcCLB.509967.170 | dynein arm light chain, putative                            | 1,308 | 1,026E-22  |
| TcCLB.509295.50  | beta galactofuranosyl glycosyltransferase, putative         | 1,308 | 4,625E-06  |
| TcCLB.509493.110 | mucin TcMUCII, putative                                     | 1,308 | 0,0003966  |
| TcCLB.511865.10  | hypothetical protein, conserved                             | 1,307 | 1,804E-39  |
| TcCLB.506649.50  | cytochrome c oxidase assembly factor, putative              | 1,307 | 1,472E-20  |
| TcCLB.511643.73  | mucin-associated surface protein (MASP, pseudogene), pu     | 1,307 | 0,02286    |
| TcCLB.506401.320 | 60S ribosomal protein L7a, putative                         | 1,306 | 3,082E-64  |
| TcCLB.511817.100 | hypothetical protein, conserved                             | 1,306 | 1,01E-33   |
| TcCLB.503527.40  | GPI alpha-mannosyltransferase III (GPI10)                   | 1,306 | 2,261E-17  |
| TcCLB.508005.10  | hypothetical protein                                        | 1,306 | 0,0752     |
| TcCLB.507711.20  | paraflagellar rod component, putative (PFC16)               | 1,305 | 1,619E-14  |
| TcCLB.510093.20  | trans-sialidase, Group VIII, putative                       | 1,305 | 4,384E-07  |
| TcCLB.508009.10  | surface protease GP63 (pseudogene), putative                | 1,305 | 0,003598   |
| TcCLB.507471.10  | surface protease GP63 (pseudogene), putative                | 1,305 | 0,247      |
| TcCLB.509777.140 | hypothetical protein, conserved                             | 1,304 | 6,751E-17  |
| TcCLB.509259.40  | surface protease GP63, putative                             | 1,304 | 0,01857    |
| TcCLB.506465.14  | hypothetical protein, conserved                             | 1,302 | 1,092E-18  |
| TcCLB.511309.40  | hydrolase-like protein, putative                            | 1,302 | 7,685E-09  |
| TcCLB.503503.30  | mucin TcMUCII, putative                                     | 1,302 | 0,0003353  |
| TcCLB.506325.36  | N-acetyltransferase complex ARD1 subunit (pseudogene),      | 1,302 | 0,007342   |
| TcCLB.509973.40  | hypothetical protein                                        | 1,302 | 0,01617    |

|                  |                                                           |       |            |
|------------------|-----------------------------------------------------------|-------|------------|
| TcCLB.508511.49  | trans-sialidase, putative                                 | 1,301 | 0,0006983  |
| TcCLB.507391.20  | hypothetical protein, conserved (pseudogene)              | 1,3   | 2,66E-19   |
| TcCLB.511885.20  | trans-sialidase, Group II, putative                       | 1,3   | 9,178E-11  |
| TcCLB.506217.40  | trans-sialidase, Group VIII, putative                     | 1,3   | 0,00004384 |
| TcCLB.509857.50  | bilobe protein, conserved                                 | 1,299 | 5,667E-33  |
| TcCLB.506367.30  | 1,2-Dihydroxy-3-keto-5-methylthiopentene dioxygenase, pu  | 1,298 | 1,448E-55  |
| TcCLB.510155.115 | hypothetical protein, conserved                           | 1,297 | 1,316E-18  |
| TcCLB.509759.10  | L-ribulokinase, putative                                  | 1,297 | 1,047E-06  |
| TcCLB.511461.60  | NADH-dependent fumarate reductase (pseudogene), putat     | 1,296 | 3,182E-45  |
| TcCLB.511807.284 | carnitine O-palmitoyltransferase II, putative             | 1,296 | 1,245E-33  |
| TcCLB.508521.40  | hypothetical protein                                      | 1,296 | 0,04737    |
| TcCLB.510101.250 | hypothetical protein, conserved                           | 1,295 | 3,784E-30  |
| TcCLB.510407.90  | serine hydroxymethyltransferase, putative                 | 1,295 | 4,027E-24  |
| TcCLB.506425.90  | hypothetical protein, conserved                           | 1,295 | 3,935E-20  |
| TcCLB.511057.30  | mucin-associated surface protein (MASP), putative         | 1,295 | 0,1006     |
| TcCLB.506843.5   | trans-sialidase, putative (fragment)                      | 1,295 | 0,319      |
| TcCLB.509437.60  | hypothetical protein, conserved                           | 1,294 | 4,84E-29   |
| TcCLB.445635.10  | receptor-type adenylate cyclase (pseudogene), putative    | 1,294 | 1,925E-17  |
| TcCLB.509331.100 | hypothetical protein, conserved                           | 1,294 | 1,642E-11  |
| TcCLB.509963.30  | tryptophanyl-tRNA synthetase (pseudogene), putative       | 1,294 | 0,04191    |
| TcCLB.509149.80  | hypothetical protein, conserved                           | 1,293 | 1,445E-27  |
| TcCLB.508045.120 | trans-sialidase, Group III, putative                      | 1,293 | 4,115E-22  |
| TcCLB.504423.15  | hypothetical protein, conserved                           | 1,293 | 4,215E-14  |
| TcCLB.511233.160 | hypothetical protein                                      | 1,293 | 0,001879   |
| TcCLB.511771.40  | trans-sialidase (pseudogene), putative                    | 1,292 | 0,0452     |
| TcCLB.506001.24  | hypothetical protein (pseudogene)                         | 1,292 | 0,1813     |
| TcCLB.507677.160 | hypothetical protein, conserved                           | 1,291 | 3,372E-37  |
| TcCLB.509977.30  | mucin-associated surface protein (MASP), putative         | 1,291 | 4,543E-08  |
| TcCLB.503579.119 | hypothetical protein, conserved                           | 1,291 | 8,631E-07  |
| TcCLB.510483.300 | mucin TcMUCII, putative                                   | 1,291 | 0,001175   |
| TcCLB.504269.20  | GPR1/FUN34/yaaH family, putative                          | 1,29  | 3,481E-31  |
| TcCLB.506467.29  | methyltransferase domain containing protein, putative (PC | 1,29  | 4,447E-31  |
| TcCLB.510667.110 | hypothetical protein, conserved                           | 1,29  | 1,015E-14  |
| TcCLB.506487.37  | hypothetical protein                                      | 1,29  | 0,0008752  |
| TcCLB.509877.60  | hypothetical protein, conserved                           | 1,289 | 3,717E-23  |
| TcCLB.506241.160 | hypothetical protein, conserved                           | 1,288 | 5,703E-31  |
| TcCLB.506129.30  | trans-sialidase, Group II, putative                       | 1,288 | 4,887E-16  |
| TcCLB.506615.120 | trans-sialidase (pseudogene), putative                    | 1,288 | 2,775E-11  |
| TcCLB.511173.89  | mucin TcMUCII (pseudogene), putative                      | 1,287 | 0,00005026 |
| TcCLB.510495.11  | surface protease GP63 (pseudogene), putative              | 1,287 | 0,002544   |
| TcCLB.511255.640 | mucin TcMUCII, putative                                   | 1,287 | 0,0473     |
| TcCLB.510289.54  | hypothetical protein, conserved                           | 1,286 | 5,824E-09  |
| TcCLB.506129.20  | dispersed gene family protein 1 (DGF-1, pseudogene), puta | 1,286 | 0,003285   |
| TcCLB.505955.4   | mucin TcMUCII, putative (fragment)                        | 1,286 | 0,009403   |
| TcCLB.510593.20  | hypothetical protein, conserved                           | 1,285 | 1,145E-24  |

|                  |                                                            |       |            |
|------------------|------------------------------------------------------------|-------|------------|
| TcCLB.510611.50  | hypothetical protein, conserved                            | 1,285 | 2,388E-20  |
| TcCLB.503531.20  | hypothetical protein, conserved                            | 1,285 | 1,173E-19  |
| TcCLB.506715.44  | hypothetical protein, conserved                            | 1,285 | 1,514E-09  |
| TcCLB.509461.50  | hypothetical protein, conserved                            | 1,284 | 2,587E-16  |
| TcCLB.508117.20  | mucin-associated surface protein (MASP, pseudogene), pu    | 1,284 | 0,0001348  |
| TcCLB.511597.10  | trans-sialidase, putative                                  | 1,284 | 0,2301     |
| TcCLB.511821.60  | protein kinase, putative                                   | 1,283 | 1,719E-18  |
| TcCLB.510053.10  | hypothetical protein, conserved                            | 1,283 | 3,374E-08  |
| TcCLB.511827.125 | trans-sialidase (pseudogene), putative                     | 1,283 | 0,0001436  |
| TcCLB.506133.75  | mucin TcMUCII (pseudogene), putative                       | 1,283 | 0,0001848  |
| TcCLB.506599.350 | mucin TcMUCII, putative                                    | 1,283 | 0,3337     |
| TcCLB.507707.20  | hypothetical protein, conserved                            | 1,282 | 4,518E-25  |
| TcCLB.504669.40  | mucin-associated surface protein (MASP, pseudogene), pu    | 1,281 | 1,976E-17  |
| TcCLB.504015.30  | surface protease GP63, putative                            | 1,281 | 2,843E-07  |
| TcCLB.510849.11  | retrotransposon hot spot protein (RHS, pseudogene), putat  | 1,281 | 0,00006471 |
| TcCLB.508641.220 | UDP-Gal or UDP-GlcNAc-dependent glycosyltransferase, pu    | 1,28  | 3,269E-10  |
| TcCLB.510041.30  | hypothetical protein, conserved (fragment)                 | 1,279 | 9,104E-06  |
| TcCLB.508799.220 | hypothetical protein, conserved (pseudogene)               | 1,279 | 0,009751   |
| TcCLB.511771.30  | beta galactofuranosyl glycosyltransferase (pseudogene), pu | 1,278 | 0,00001174 |
| TcCLB.506995.40  | mucin TcMUCII, putative                                    | 1,278 | 0,002859   |
| TcCLB.477983.10  | calpain cysteine peptidase, putative                       | 1,278 | 0,03956    |
| TcCLB.506145.30  | O-6 methyl-guanine alkyl transferase, putative             | 1,277 | 2,511E-08  |
| TcCLB.509217.60  | trans-sialidase (pseudogene), putative                     | 1,277 | 0,003167   |
| TcCLB.511025.80  | hypothetical protein, conserved                            | 1,276 | 3,808E-08  |
| TcCLB.510595.30  | hypothetical protein                                       | 1,276 | 3,203E-07  |
| TcCLB.506843.40  | retrotransposon hot spot (RHS) protein, putative           | 1,275 | 7,301E-54  |
| TcCLB.509459.60  | Na/H antiporter-like protein, putative                     | 1,275 | 2,429E-39  |
| TcCLB.503469.9   | dispersed gene family protein 1 (DGF-1), putative (fragme  | 1,275 | 9,542E-13  |
| TcCLB.510095.20  | trans-sialidase, Group II, putative                        | 1,275 | 0,08359    |
| TcCLB.507105.100 | retrotransposon hot spot protein (RHS, pseudogene), putat  | 1,273 | 1,387E-41  |
| TcCLB.508995.60  | electron transport protein SCO1/2, putative                | 1,273 | 7,364E-14  |
| TcCLB.415803.10  | hypothetical protein, conserved                            | 1,273 | 9,319E-07  |
| TcCLB.507163.20  | hypothetical protein                                       | 1,273 | 0,0228     |
| TcCLB.507547.90  | Phosphoenolpyruvate carboxykinase [ATP], glycosomal        | 1,272 | 7,495E-56  |
| TcCLB.508039.30  | retrotransposon hot spot (RHS) protein, putative           | 1,272 | 1,481E-25  |
| TcCLB.511829.5   | trans-sialidase (pseudogene), putative                     | 1,272 | 3,564E-10  |
| TcCLB.508055.20  | retrotransposon hot spot protein (RHS, pseudogene), putat  | 1,271 | 3,512E-07  |
| TcCLB.506401.170 | plasma membrane Ca <sup>2+</sup> ATPase                    | 1,27  | 4,217E-55  |
| TcCLB.504177.10  | fatty acyl CoA synthetase 2, putative                      | 1,27  | 1,307E-12  |
| TcCLB.507959.200 | mucin TcMUCII, putative                                    | 1,27  | 0,03236    |
| TcCLB.506279.90  | mucin TcMUCII, putative                                    | 1,27  | 0,06124    |
| TcCLB.509153.130 | hypothetical protein                                       | 1,268 | 3,815E-21  |
| TcCLB.510303.200 | glucosamine-fructose-6-phosphate aminotransferase, puta    | 1,266 | 2,828E-23  |
| TcCLB.507167.80  | trans-sialidase, Group II, putative                        | 1,266 | 0,00001489 |
| TcCLB.508157.40  | hypothetical protein                                       | 1,266 | 0,005465   |

|                  |                                                               |       |           |
|------------------|---------------------------------------------------------------|-------|-----------|
| TcCLB.507071.164 | mucln TcMUCII (pseudogene), putative                          | 1,266 | 0,1019    |
| TcCLB.510087.90  | hypothetical protein, conserved                               | 1,265 | 3,439E-12 |
| TcCLB.511807.22  | retrotransposon hot spot protein (RHS, pseudogene), putative  | 1,264 | 3,01E-22  |
| TcCLB.507991.129 | cyclophilin, putative                                         | 1,264 | 1,22E-12  |
| TcCLB.507925.60  | calcium-binding protein, putative                             | 1,263 | 1,246E-14 |
| TcCLB.509859.80  | coronin, putative (CRN12)                                     | 1,262 | 4,436E-43 |
| TcCLB.503775.50  | mucln TcMUCII (pseudogene), putative                          | 1,261 | 0,02666   |
| TcCLB.506779.180 | surface protease GP63, putative                               | 1,26  | 4,579E-10 |
| TcCLB.511531.30  | hypothetical protein, conserved                               | 1,26  | 1,362E-06 |
| TcCLB.507895.80  | hypothetical protein, conserved                               | 1,259 | 2,027E-22 |
| TcCLB.510921.20  | mucln TcMUCII, putative                                       | 1,259 | 0,001033  |
| TcCLB.510359.120 | hypothetical protein, conserved (pseudogene)                  | 1,258 | 7,782E-19 |
| TcCLB.511005.10  | retrotransposon hot spot (RHS) protein, putative (fragment)   | 1,258 | 5,001E-16 |
| TcCLB.490989.10  | trans-sialidase, putative                                     | 1,258 | 0,001253  |
| TcCLB.508441.20  | Phosphoenolpyruvate carboxykinase [ATP], glycosomal           | 1,257 | 4,516E-63 |
| TcCLB.509137.30  | imidazolonepropionase, putative                               | 1,257 | 1,556E-34 |
| TcCLB.511065.23  | hypothetical protein, conserved                               | 1,257 | 1,068E-13 |
| TcCLB.511245.10  | hypothetical protein, conserved                               | 1,257 | 4,047E-12 |
| TcCLB.511593.20  | mucln TcMUCII, putative                                       | 1,257 | 0,0347    |
| TcCLB.511517.44  | chaperone DNAJ protein, putative                              | 1,256 | 6,425E-22 |
| TcCLB.506811.20  | hypothetical protein, conserved                               | 1,255 | 1,417E-18 |
| TcCLB.505183.14  | hypothetical protein, conserved                               | 1,255 | 3,131E-12 |
| TcCLB.510187.439 | hypothetical protein                                          | 1,254 | 1,419E-42 |
| TcCLB.511337.4   | hypothetical protein, conserved                               | 1,254 | 1,663E-06 |
| TcCLB.510603.160 | hypothetical protein, conserved                               | 1,253 | 2,06E-20  |
| TcCLB.508261.80  | trans-sialidase (pseudogene), putative                        | 1,253 | 0,001432  |
| TcCLB.508975.30  | UDP-Gal or UDP-GlcNAc-dependent glycosyltransferase, putative | 1,253 | 0,07595   |
| TcCLB.508433.170 | mucln TcMUCII, putative                                       | 1,253 | 0,1859    |
| TcCLB.508045.90  | oxidoreductase, putative                                      | 1,252 | 4,328E-19 |
| TcCLB.504669.30  | surface protease GP63, putative                               | 1,252 | 3,07E-15  |
| TcCLB.511773.110 | retrotransposon hot spot (RHS) protein, putative              | 1,251 | 1,801E-37 |
| TcCLB.510479.11  | retrotransposon hot spot (RHS) protein, putative (fragment)   | 1,251 | 2,494E-21 |
| TcCLB.458015.4   | hypothetical protein, conserved                               | 1,251 | 1,719E-18 |
| TcCLB.508501.190 | hypothetical protein, conserved                               | 1,251 | 4,466E-09 |
| TcCLB.509769.30  | hypothetical protein, conserved                               | 1,251 | 2,582E-06 |
| TcCLB.509373.30  | mucln-associated surface protein (MASP, pseudogene), putative | 1,251 | 0,005835  |
| TcCLB.508743.10  | surface antigen TASV, putative                                | 1,25  | 4,963E-25 |
| TcCLB.509217.180 | trans-sialidase (pseudogene), putative                        | 1,249 | 0,1088    |
| TcCLB.418221.30  | hypothetical protein, conserved                               | 1,248 | 9,615E-51 |
| TcCLB.508077.9   | conserved protein (fragment)                                  | 1,248 | 2,458E-39 |
| TcCLB.506941.40  | hypothetical protein, conserved                               | 1,248 | 2,813E-16 |
| TcCLB.510361.160 | retrotransposon hot spot protein (RHS, pseudogene), putative  | 1,248 | 1,366E-06 |
| TcCLB.507801.200 | dispersed gene family protein 1 (DGF-1), putative             | 1,248 | 0,04702   |
| TcCLB.507357.90  | mucln-associated surface protein (MASP), putative             | 1,248 | 0,09597   |
| TcCLB.506775.130 | hypothetical protein, conserved                               | 1,247 | 1,611E-31 |

|                  |                                                           |       |            |
|------------------|-----------------------------------------------------------|-------|------------|
| TcCLB.509199.24  | ribose 5-phosphate isomerase type B                       | 1,247 | 6,184E-22  |
| TcCLB.504105.70  | hypothetical protein, conserved                           | 1,247 | 1,918E-21  |
| TcCLB.506015.30  | mucin-associated surface protein (MASP, pseudogene), pu   | 1,247 | 3,29E-12   |
| TcCLB.509237.90  | hypothetical protein, conserved                           | 1,247 | 1,161E-09  |
| TcCLB.507133.10  | trans-sialidase, putative                                 | 1,247 | 0,00001371 |
| TcCLB.508115.10  | hypothetical protein                                      | 1,247 | 0,000348   |
| TcCLB.494675.10  | fatty acyl CoA synthetase 2, putative                     | 1,246 | 5,264E-22  |
| TcCLB.503521.30  | Dynein light chain roadblock-type protein, putative       | 1,246 | 4,589E-17  |
| TcCLB.508325.270 | retrotransposon hot spot protein (RHS, pseudogene), putat | 1,245 | 6,195E-15  |
| TcCLB.503891.80  | hypothetical protein, conserved                           | 1,245 | 1,078E-14  |
| TcCLB.509279.10  | hypothetical protein, conserved                           | 1,245 | 1,226E-08  |
| TcCLB.508873.30  | mucin-associated surface protein (MASP), putative         | 1,245 | 2,432E-08  |
| TcCLB.510851.21  | retrotransposon hot spot protein (RHS, pseudogene), putat | 1,244 | 1,098E-27  |
| TcCLB.437121.9   | hypothetical protein, conserved (fragment)                | 1,244 | 4,529E-20  |
| TcCLB.507485.100 | hypothetical protein, conserved                           | 1,244 | 3,015E-18  |
| TcCLB.511233.80  | calmodulin, putative                                      | 1,244 | 1,486E-16  |
| TcCLB.511645.21  | mucin TcMUCII, putative                                   | 1,244 | 0,0001993  |
| TcCLB.506799.120 | hypothetical protein                                      | 1,244 | 0,000332   |
| TcCLB.503507.20  | mucin TcMUCII, putative (fragment)                        | 1,244 | 0,1028     |
| TcCLB.503849.60  | NADH-dependent fumarate reductase, putative               | 1,243 | 4,347E-29  |
| TcCLB.508179.60  | protein kinase, putative                                  | 1,243 | 1,064E-25  |
| TcCLB.506615.50  | mucin TcMUCII, putative                                   | 1,243 | 3,298E-08  |
| TcCLB.510025.80  | hypothetical protein, conserved (pseudogene)              | 1,243 | 0,00001025 |
| TcCLB.506599.250 | surface protease GP63 (pseudogene), putative              | 1,243 | 0,09386    |
| TcCLB.510859.17  | nucleolar RNA-binding protein, putative                   | 1,242 | 6,03E-65   |
| TcCLB.508443.60  | hypothetical protein, conserved                           | 1,242 | 7,682E-19  |
| TcCLB.510861.30  | hypothetical protein, conserved                           | 1,241 | 4,707E-21  |
| TcCLB.505807.10  | cyclophilin, putative                                     | 1,241 | 4,075E-11  |
| TcCLB.511797.260 | mucin-associated surface protein (MASP, pseudogene), pu   | 1,241 | 0,05821    |
| TcCLB.510959.15  | elongation factor 1-gamma (EF-1-gamma, pseudogene), p     | 1,241 | 0,08962    |
| TcCLB.505757.20  | transcriptional regulator, putative                       | 1,239 | 1,78E-13   |
| TcCLB.504797.100 | 35 kDa cyclophilin, putative (CYP35)                      | 1,238 | 1,521E-14  |
| TcCLB.509013.10  | calpain-like cysteine peptidase, putative                 | 1,238 | 3,025E-09  |
| TcCLB.511825.180 | ATP-dependent DEAD/H RNA helicase, putative               | 1,237 | 4,805E-38  |
| TcCLB.509979.150 | nitrilase, putative                                       | 1,237 | 4,523E-25  |
| TcCLB.510519.14  | hypothetical protein, conserved                           | 1,237 | 1,659E-07  |
| TcCLB.452283.10  | amino acid permease (pseudogene), putative                | 1,236 | 8,552E-08  |
| TcCLB.511731.74  | hypothetical protein, conserved                           | 1,235 | 7,393E-13  |
| TcCLB.510037.10  | mucin-associated surface protein (MASP), putative         | 1,235 | 7,907E-09  |
| TcCLB.508461.580 | hypothetical protein                                      | 1,234 | 6,831E-37  |
| TcCLB.509721.40  | MIX protein, putative                                     | 1,234 | 7,221E-15  |
| TcCLB.506567.70  | NAD(P)-dependent oxidoreductase, putative                 | 1,233 | 4,207E-26  |
| TcCLB.511393.49  | hypothetical protein, conserved                           | 1,233 | 1,095E-18  |
| TcCLB.507645.20  | hypothetical protein, conserved                           | 1,233 | 4,109E-16  |
| TcCLB.509767.230 | hypothetical protein, conserved                           | 1,233 | 1,167E-14  |

|                  |                                                           |       |            |
|------------------|-----------------------------------------------------------|-------|------------|
| TcCLB.507023.80  | hypothetical protein, conserved                           | 1,233 | 3,346E-08  |
| TcCLB.508167.20  | mucin TcMUCII, putative                                   | 1,233 | 0,007308   |
| TcCLB.507957.43  | hypothetical protein, conserved (pseudogene)              | 1,233 | 0,2        |
| TcCLB.506825.100 | hypothetical protein, conserved                           | 1,232 | 3,416E-23  |
| TcCLB.506261.10  | fatty acyl CoA synthetase 2, putative                     | 1,231 | 2,239E-24  |
| TcCLB.507787.100 | gamma-glutamylcysteine synthetase, putative               | 1,223 | 1,076E-22  |
| TcCLB.509597.29  | hypothetical protein, conserved                           | 1,229 | 9,216E-12  |
| TcCLB.508501.10  | hypothetical protein                                      | 1,228 | 0,002212   |
| TcCLB.507709.60  | hypothetical protein, conserved                           | 1,227 | 9,579E-35  |
| TcCLB.511589.74  | hypothetical protein                                      | 1,227 | 1,13E-17   |
| TcCLB.506843.20  | retrotransposon hot spot protein (RHS, pseudogene), putat | 1,227 | 3,118E-11  |
| TcCLB.508143.50  | trans-sialidase (pseudogene), putative                    | 1,227 | 1,773E-10  |
| TcCLB.508343.10  | trans-sialidase, putative                                 | 1,227 | 0,3665     |
| TcCLB.504071.30  | hypothetical protein, conserved                           | 1,226 | 9,661E-50  |
| TcCLB.509431.10  | hypothetical protein, conserved (pseudogene)              | 1,226 | 6,708E-15  |
| TcCLB.510889.261 | cruzipain precursor, putative                             | 1,226 | 1,815E-08  |
| TcCLB.508541.160 | hypothetical protein, conserved                           | 1,226 | 3,442E-07  |
| TcCLB.510137.10  | trans-sialidase (pseudogene), putative                    | 1,226 | 0,00003394 |
| TcCLB.506327.90  | serine/threonine protein kinase, putative                 | 1,225 | 2,968E-35  |
| TcCLB.507011.240 | hypothetical protein, conserved                           | 1,224 | 1,433E-09  |
| TcCLB.510111.11  | trans-sialidase (pseudogene), putative                    | 1,224 | 0,00001071 |
| TcCLB.506055.30  | retrotransposon hot spot protein (RHS, pseudogene), putat | 1,224 | 0,00007329 |
| TcCLB.506779.90  | hypothetical protein, conserved                           | 1,223 | 2,622E-38  |
| TcCLB.506943.40  | hypothetical protein, conserved                           | 1,223 | 6,589E-13  |
| TcCLB.508297.41  | hypothetical protein, conserved                           | 1,223 | 7,648E-08  |
| TcCLB.509115.50  | mucin-like glycoprotein, putative                         | 1,223 | 0,00006225 |
| TcCLB.511671.20  | trans-sialidase (pseudogene), putative                    | 1,223 | 0,0003099  |
| TcCLB.511395.80  | hypothetical protein                                      | 1,222 | 1,314E-20  |
| TcCLB.508831.10  | hypothetical protein, conserved                           | 1,222 | 1,145E-17  |
| TcCLB.507747.180 | trans-sialidase, Group VI, putative                       | 1,222 | 2,139E-12  |
| TcCLB.510165.90  | trans-sialidase (pseudogene), putative                    | 1,222 | 0,00003542 |
| TcCLB.508885.10  | surface protease GP63 (pseudogene), putative              | 1,222 | 0,06277    |
| TcCLB.506775.30  | tubulin-tyrosine ligase-like protein, putative            | 1,221 | 7,193E-37  |
| TcCLB.508547.150 | hypothetical protein, conserved                           | 1,221 | 9,555E-37  |
| TcCLB.510661.190 | protein kinase, putative                                  | 1,221 | 0,0007532  |
| TcCLB.508081.50  | mucin-associated surface protein (MASP), putative         | 1,221 | 0,001475   |
| TcCLB.511181.40  | hypothetical protein                                      | 1,22  | 2,591E-10  |
| TcCLB.503993.20  | hypothetical protein                                      | 1,22  | 0,04997    |
| TcCLB.510039.70  | hypothetical protein, conserved                           | 1,218 | 4,618E-16  |
| TcCLB.506349.47  | retrotransposon hot spot protein (RHS, pseudogene), putat | 1,218 | 0,0004415  |
| TcCLB.503613.60  | acidocalcisomal pyrophosphatase, putative                 | 1,217 | 3,026E-29  |
| TcCLB.506831.63  | hypothetical protein, conserved                           | 1,217 | 3,109E-13  |
| TcCLB.506501.70  | mucin TcMUCII, putative                                   | 1,217 | 0,03847    |
| TcCLB.511805.20  | Trichohyalin, putative                                    | 1,216 | 1,713E-08  |
| TcCLB.509331.150 | permease-like protein, putative                           | 1,216 | 5,252E-08  |



|                  |                                                           |       |            |
|------------------|-----------------------------------------------------------|-------|------------|
| TcCLB.509925.20  | mucin TcMUCII, putative                                   | 1,216 | 2,252E-07  |
| TcCLB.506329.50  | mucin TcMUCII, putative                                   | 1,216 | 0,03921    |
| TcCLB.510101.90  | hypothetical protein, conserved                           | 1,215 | 3,923E-44  |
| TcCLB.503925.40  | hypothetical protein                                      | 1,215 | 6,022E-12  |
| TcCLB.503697.40  | hypothetical protein                                      | 1,215 | 2,819E-09  |
| TcCLB.506153.3   | hypothetical protein, conserved                           | 1,214 | 4,469E-17  |
| TcCLB.503739.20  | trans-sialidase (pseudogene), putative                    | 1,214 | 1,464E-08  |
| TcCLB.507779.20  | trans-sialidase (pseudogene), putative                    | 1,214 | 1,917E-06  |
| TcCLB.511843.60  | retrotransposon hot spot protein (RHS, pseudogene), putat | 1,214 | 0,00003003 |
| TcCLB.508221.860 | mucin-associated surface protein (MASP, pseudogene), pu   | 1,214 | 0,01745    |
| TcCLB.511773.90  | retrotransposon hot spot protein (RHS, pseudogene), putat | 1,213 | 7,222E-20  |
| TcCLB.441401.10  | imidazolonepropienase, putative                           | 1,213 | 1,247E-17  |
| TcCLB.508695.10  | hypothetical protein, conserved                           | 1,213 | 0,00001238 |
| TcCLB.508761.150 | mucin-associated surface protein (MASP, pseudogene), pu   | 1,213 | 0,03543    |
| TcCLB.510101.430 | 40S ribosomal protein S21, putative                       | 1,212 | 4,732E-25  |
| TcCLB.506375.90  | hypothetical protein, conserved                           | 1,212 | 8,844E-16  |
| TcCLB.509695.20  | hypothetical protein, conserved                           | 1,212 | 3,085E-13  |
| TcCLB.509885.80  | hypothetical protein, conserved                           | 1,212 | 0,00002323 |
| TcCLB.504039.120 | mucin TcMUCII, putative                                   | 1,212 | 0,0663     |
| TcCLB.418185.50  | retrotransposon hot spot protein (RHS, pseudogene), putat | 1,211 | 2,792E-17  |
| TcCLB.506305.29  | hypothetical protein, conserved                           | 1,209 | 5,625E-25  |
| TcCLB.508177.10  | hypothetical protein, conserved                           | 1,209 | 4,104E-18  |
| TcCLB.511373.20  | mucin TcMUCII, putative                                   | 1,209 | 0,0005525  |
| TcCLB.509857.40  | hypothetical protein, conserved                           | 1,208 | 2,133E-36  |
| TcCLB.511595.50  | mucin-associated surface protein (MASP, pseudogene), pu   | 1,208 | 0,0001022  |
| TcCLB.510715.64  | mucin-associated surface protein (MASP), putative         | 1,208 | 0,1392     |
| TcCLB.504131.180 | ATPase subunit 9, putative                                | 1,207 | 2,978E-30  |
| TcCLB.511645.10  | mucin-associated surface protein (MASP), putative         | 1,207 | 0,00009239 |
| TcCLB.508165.400 | mucin TcMUCII, putative                                   | 1,207 | 0,006041   |
| TcCLB.510947.30  | hypothetical protein, conserved                           | 1,206 | 1,362E-18  |
| TcCLB.508507.40  | hypothetical protein, conserved                           | 1,206 | 4,157E-07  |
| TcCLB.508139.110 | hypothetical protein                                      | 1,206 | 0,01237    |
| TcCLB.510279.40  | 90 kDa surface protein, putative                          | 1,206 | 0,03755    |
| TcCLB.509875.170 | pyruvate dehydrogenase (lipoamide) kinase, putative       | 1,205 | 1,706E-23  |
| TcCLB.507669.10  | fumarate hydratase, putative                              | 1,204 | 1,44E-23   |
| TcCLB.506791.50  | Present in the outer mitochondrial membrane proteome 3'   | 1,204 | 1,687E-19  |
| TcCLB.442383.19  | hypothetical protein                                      | 1,204 | 6,293E-16  |
| TcCLB.503645.40  | mucin-associated surface protein (MASP), putative         | 1,204 | 0,05722    |
| TcCLB.510267.20  | 60S acidic ribosomal protein P2, putative                 | 1,203 | 3,766E-20  |
| TcCLB.511255.30  | mucin-associated surface protein (MASP), putative         | 1,203 | 0,001235   |
| TcCLB.506281.117 | mucin TcMUCII (pseudogene), putative                      | 1,203 | 0,01347    |
| TcCLB.508161.26  | mucin TcMUCII (pseudogene), putative                      | 1,203 | 0,04364    |
| TcCLB.508503.90  | hypothetical protein, conserved                           | 1,202 | 1,1E-16    |
| TcCLB.506941.220 | Present in the outer mitochondrial membrane proteome 3'   | 1,202 | 2,858E-12  |
| TcCLB.508241.50  | surface protease GP63, putative                           | 1,201 | 1,693E-22  |

|                  |                                                           |       |            |
|------------------|-----------------------------------------------------------|-------|------------|
| TcCLB.511465.10  | proteasome activator protein pa26, putative               | 1,201 | 2,755E-19  |
| TcCLB.503741.40  | mucin TcMUCII, putative                                   | 1,201 | 0,06557    |
| TcCLB.506401.310 | hypothetical protein, conserved                           | 1,2   | 8,359E-14  |
| TcCLB.507519.120 | hypothetical protein, conserved                           | 1,2   | 3,589E-13  |
| TcCLB.509725.100 | hypothetical protein, conserved (pseudogene)              | 1,2   | 3,234E-12  |
| TcCLB.406377.10  | hypothetical protein, conserved (pseudogene)              | 1,2   | 0,00002983 |
| TcCLB.510553.30  | mucin-associated surface protein (MASP), putative         | 1,199 | 0,0005997  |
| TcCLB.509331.221 | hypothetical protein, conserved                           | 1,199 | 0,008663   |
| TcCLB.508097.60  | mucin-associated surface protein (MASP), putative         | 1,199 | 0,08759    |
| TcCLB.508831.220 | trans-sialidase (pseudogene), putative                    | 1,199 | 0,1503     |
| TcCLB.508587.10  | retrotransposon hot spot protein (RHS, pseudogene), putat | 1,197 | 1,411E-14  |
| TcCLB.508257.10  | serine-palmitoyl-CoA transferase, putative                | 1,197 | 3,603E-09  |
| TcCLB.508273.120 | mucin TcMUCI, putative                                    | 1,197 | 0,0008508  |
| TcCLB.508221.87  | retrotransposon hot spot protein (RHS, pseudogene), putat | 1,196 | 0,0005159  |
| TcCLB.504769.100 | trans-sialidase, Group II, putative                       | 1,195 | 3,008E-08  |
| TcCLB.511183.90  | mucin TcMUCII, putative                                   | 1,195 | 0,05169    |
| TcCLB.506401.304 | mitochondrial carrier protein, putative                   | 1,194 | 5,725E-22  |
| TcCLB.509195.40  | mucin TcMUCII, putative                                   | 1,194 | 0,003848   |
| TcCLB.507547.18  | mucin TcMUCI, putative                                    | 1,194 | 0,07797    |
| TcCLB.506893.10  | mucin TcMUCII, putative                                   | 1,194 | 0,1427     |
| TcCLB.421231.10  | hypothetical protein, conserved                           | 1,193 | 1,552E-17  |
| TcCLB.510359.650 | mucin-associated surface protein (MASP), putative         | 1,193 | 0,1061     |
| TcCLB.510533.170 | hypothetical protein, conserved                           | 1,192 | 8,93E-10   |
| TcCLB.510561.20  | mucin TcMUCII, putative                                   | 1,192 | 0,01308    |
| TcCLB.506773.80  | hypothetical protein, conserved                           | 1,191 | 1,059E-26  |
| TcCLB.506347.5   | trans-sialidase, putative (fragment)                      | 1,191 | 0,004524   |
| TcCLB.506283.20  | trans-sialidase, putative                                 | 1,191 | 0,1189     |
| TcCLB.509765.50  | trans-sialidase, Group VIII, putative                     | 1,189 | 0,1554     |
| TcCLB.511929.30  | retrotransposon hot spot (RHS) protein, putative          | 1,188 | 1,635E-13  |
| TcCLB.508975.10  | acyl-CoA dehydrogenase, mitochondrial precursor, putative | 1,187 | 6,897E-33  |
| TcCLB.511589.110 | hypothetical protein, conserved                           | 1,187 | 1,301E-28  |
| TcCLB.509855.20  | Probable methyltransferase BTM2 homolog                   | 1,187 | 6,538E-21  |
| TcCLB.507317.30  | hypothetical protein, conserved                           | 1,187 | 4,188E-11  |
| TcCLB.506825.70  | serine-threonine dehydratase, putative                    | 1,187 | 1,373E-08  |
| TcCLB.510003.41  | clathrin coat assembly protein ap19, putative             | 1,186 | 9,71E-94   |
| TcCLB.510145.10  | hypothetical protein, conserved                           | 1,186 | 7,425E-08  |
| TcCLB.404431.10  | trans-sialidase, putative                                 | 1,186 | 0,0001694  |
| TcCLB.506145.80  | surface protease GP63, putative                           | 1,185 | 7,387E-17  |
| TcCLB.504427.70  | 3-oxo-5-alpha-steroid 4-dehydrogenase, putative           | 1,185 | 1,241E-13  |
| TcCLB.508119.140 | retrotransposon hot spot (RHS) protein, putative          | 1,185 | 6,456E-08  |
| TcCLB.503965.20  | hypothetical protein, conserved                           | 1,184 | 1,262E-22  |
| TcCLB.509161.10  | ubiquitin-conjugating enzyme E2, putative                 | 1,184 | 1,253E-21  |
| TcCLB.511807.230 | hypothetical protein                                      | 1,183 | 2,855E-34  |
| TcCLB.508267.40  | hypothetical protein, conserved                           | 1,183 | 1,172E-23  |
| TcCLB.511875.70  | mucin TcMUCII (pseudogene), putative                      | 1,183 | 2,214E-07  |

|                  |                                                                  |       |           |
|------------------|------------------------------------------------------------------|-------|-----------|
| TcCLB.509599.130 | serine/threonine protein kinase, putative                        | 1,182 | 2,765E-25 |
| TcCLB.510847.10  | trans-sialidase, Group VIII, putative                            | 1,182 | 2,665E-15 |
| TcCLB.508781.120 | hypothetical protein, conserved                                  | 1,182 | 2,341E-12 |
| TcCLB.508751.20  | trans-sialidase (pseudogene), putative                           | 1,182 | 0,007131  |
| TcCLB.507221.40  | hypothetical protein                                             | 1,181 | 3,296E-13 |
| TcCLB.506369.60  | hypothetical protein, conserved                                  | 1,181 | 2,114E-11 |
| TcCLB.506995.60  | surface protease GP63, putative                                  | 1,181 | 0,01077   |
| TcCLB.506741.70  | surface protease GP63 (pseudogene), putative                     | 1,181 | 0,134     |
| TcCLB.511827.30  | hypothetical protein                                             | 1,18  | 3,785E-18 |
| TcCLB.508045.4   | hypothetical protein, conserved                                  | 1,18  | 1,806E-17 |
| TcCLB.506239.40  | hypothetical protein, conserved                                  | 1,18  | 5,14E-13  |
| TcCLB.509769.80  | hypothetical protein, conserved                                  | 1,179 | 1,283E-54 |
| TcCLB.503861.10  | retrotransposon hot spot (RHS) protein, putative                 | 1,179 | 2,957E-40 |
| TcCLB.508965.80  | hypothetical protein, conserved                                  | 1,179 | 9,948E-15 |
| TcCLB.508119.110 | kynureninase, putative                                           | 1,179 | 4,084E-13 |
| TcCLB.511219.40  | trans-sialidase, Group II, putative                              | 1,179 | 4,729E-07 |
| TcCLB.509219.20  | retrotransposon hot spot (RHS) protein, putative                 | 1,178 | 2,194E-36 |
| TcCLB.506505.30  | hypothetical protein, conserved                                  | 1,177 | 3,621E-23 |
| TcCLB.504239.340 | mucin TcMUCII, putative                                          | 1,177 | 0,1065    |
| TcCLB.508713.10  | hypothetical protein, conserved                                  | 1,176 | 2,955E-34 |
| TcCLB.511827.50  | hypothetical protein                                             | 1,176 | 7,662E-10 |
| TcCLB.506435.50  | hypothetical protein, conserved                                  | 1,176 | 7,782E-09 |
| TcCLB.506133.61  | mucin-associated surface protein (MASP), putative                | 1,175 | 0,09389   |
| TcCLB.503479.30  | adenylate kinase 1                                               | 1,174 | 6,797E-20 |
| TcCLB.508241.70  | hypothetical protein, conserved                                  | 1,174 | 1,913E-15 |
| TcCLB.511807.36  | hypothetical protein                                             | 1,174 | 7,493E-15 |
| TcCLB.509651.10  | hypothetical protein, conserved                                  | 1,174 | 4,836E-14 |
| TcCLB.510095.70  | retrotransposon hot spot protein (RHS, pseudogene), putative     | 1,174 | 6,729E-13 |
| TcCLB.503949.40  | UDP-Gal or UDP-GlcNAc-dependent glycosyltransferase, putative    | 1,174 | 2,504E-07 |
| TcCLB.505975.30  | beta galactofuranosyl glycosyltransferase (pseudogene), putative | 1,174 | 6,883E-06 |
| TcCLB.509623.19  | clathrin coat assembly protein ap19, putative (ClaATc)           | 1,173 | 2,255E-92 |
| TcCLB.508173.60  | cis-prenyltransferase, putative                                  | 1,173 | 1,702E-18 |
| TcCLB.504769.10  | hypothetical protein                                             | 1,173 | 3,558E-08 |
| TcCLB.508851.90  | hypothetical protein, conserved                                  | 1,172 | 1,585E-12 |
| TcCLB.509863.10  | UDP-Gal or UDP-GlcNAc-dependent glycosyltransferase, putative    | 1,172 | 1,143E-11 |
| TcCLB.506843.137 | retrotransposon hot spot protein (RHS, pseudogene), putative     | 1,172 | 0,01839   |
| TcCLB.508247.70  | mucin TcMUCII, putative                                          | 1,172 | 0,1477    |
| TcCLB.505647.10  | hypothetical protein, conserved                                  | 1,171 | 2,078E-41 |
| TcCLB.506595.100 | 60S acidic ribosomal protein P2, putative                        | 1,171 | 3,483E-27 |
| TcCLB.510155.100 | hypothetical protein                                             | 1,171 | 7,755E-27 |
| TcCLB.509905.20  | retrotransposon hot spot protein (RHS, pseudogene), putative     | 1,171 | 1,046E-06 |
| TcCLB.510329.10  | hypothetical protein, conserved                                  | 1,17  | 7,773E-34 |
| TcCLB.511741.60  | hypothetical protein, conserved                                  | 1,17  | 1,843E-18 |
| TcCLB.510369.10  | mucin-associated surface protein (MASP), putative                | 1,17  | 0,01867   |
| TcCLB.511377.20  | trans-sialidase (pseudogene), putative                           | 1,17  | 0,04773   |

|                  |                                                           |       |            |
|------------------|-----------------------------------------------------------|-------|------------|
| TcCLB.508461.570 | Gim5A protein, putative                                   | 1,169 | 2,384E-48  |
| TcCLB.511817.200 | Present in the outer mitochondrial membrane proteome 3:   | 1,169 | 2,687E-17  |
| TcCLB.504907.9   | dispersed gene family protein 1 (DGF-1), putative (fragme | 1,169 | 3,406E-07  |
| TcCLB.507153.10  | hypothetical protein, conserved                           | 1,169 | 0,01114    |
| TcCLB.510345.50  | hypothetical protein, conserved                           | 1,168 | 2,937E-20  |
| TcCLB.511825.100 | hypothetical protein, conserved                           | 1,168 | 6,118E-16  |
| TcCLB.510661.174 | riboflavin kinase, putative                               | 1,168 | 1,32E-09   |
| TcCLB.511819.50  | hypothetical protein, conserved                           | 1,167 | 2,121E-35  |
| TcCLB.504109.200 | retrotransposon hot spot (RHS) protein, putative          | 1,167 | 1,975E-33  |
| TcCLB.504065.50  | trans-sialidase (pseudogene), putative                    | 1,167 | 4,377E-22  |
| TcCLB.507255.30  | retrotransposon hot spot protein (RHS, pseudogene), putat | 1,167 | 1,815E-11  |
| TcCLB.506973.120 | trans-sialidase, Group V, putative                        | 1,167 | 0,0001333  |
| TcCLB.508165.210 | mucin-associated surface protein (MASP), putative         | 1,167 | 0,007444   |
| TcCLB.510025.165 | hypothetical protein, conserved (pseudogene)              | 1,167 | 0,09575    |
| TcCLB.510101.40  | 60S ribosomal protein L28, putative                       | 1,166 | 6,212E-49  |
| TcCLB.507569.10  | hypothetical protein, conserved                           | 1,166 | 7,378E-24  |
| TcCLB.505163.70  | Selenoprotein T, putative (SelT)                          | 1,166 | 2,494E-22  |
| TcCLB.481211.10  | mucin TcMUCII, putative                                   | 1,166 | 0,000366   |
| TcCLB.511613.100 | elongation factor 1-gamma (EF-1-gamma), putative          | 1,166 | 0,06912    |
| TcCLB.506775.150 | hypothetical protein, conserved                           | 1,165 | 5,736E-17  |
| TcCLB.507853.10  | lathosterol oxidase, putative                             | 1,165 | 3,59E-16   |
| TcCLB.511361.50  | hypothetical protein, conserved                           | 1,165 | 7,97E-09   |
| TcCLB.508267.60  | hypothetical protein, conserved (fragment)                | 1,165 | 9,533E-09  |
| TcCLB.510763.30  | hypothetical protein, conserved                           | 1,165 | 0,0000175  |
| TcCLB.508159.13  | trans-sialidase (pseudogene), putative                    | 1,165 | 0,00006006 |
| TcCLB.507063.60  | hypothetical protein, conserved                           | 1,165 | 0,001729   |
| TcCLB.504081.330 | mucin TcMUCII, putative                                   | 1,165 | 0,1195     |
| TcCLB.508331.90  | retrotransposon hot spot protein (RHS, pseudogene), putat | 1,164 | 1,019E-12  |
| TcCLB.503723.20  | hypothetical protein, conserved                           | 1,164 | 2,32E-11   |
| TcCLB.507659.20  | amino acid transporter, putative                          | 1,162 | 4,778E-66  |
| TcCLB.510309.20  | MFS transporter, putative                                 | 1,162 | 4,066E-26  |
| TcCLB.506921.10  | surface protease GP63, putative                           | 1,162 | 8,798E-20  |
| TcCLB.508863.20  | hypothetical protein, conserved                           | 1,162 | 5E-10      |
| TcCLB.509875.165 | trans-sialidase (pseudogene), putative                    | 1,162 | 0,00002164 |
| TcCLB.510101.360 | hypothetical protein, conserved                           | 1,161 | 4,453E-33  |
| TcCLB.503873.10  | cytochrome-b5 reductase, putative                         | 1,161 | 1,675E-29  |
| TcCLB.508241.60  | phosphoadenosine phosphosulfate reductase-like protein,   | 1,161 | 9,488E-24  |
| TcCLB.506885.90  | hypothetical protein, conserved                           | 1,161 | 2,47E-21   |
| TcCLB.511643.30  | aspartate carbamoyltransferase, putative                  | 1,161 | 1,553E-19  |
| TcCLB.506175.25  | hypothetical protein                                      | 1,161 | 2,57E-18   |
| TcCLB.507245.20  | trans-sialidase (pseudogene), putative                    | 1,161 | 3,636E-09  |
| TcCLB.503417.30  | mucin TcMUCII, putative                                   | 1,161 | 0,07755    |
| TcCLB.511815.50  | hypothetical protein, conserved                           | 1,16  | 2,07E-33   |
| TcCLB.507477.10  | dispersed gene family protein 1 (DGF-1), putative         | 1,16  | 3,295E-13  |
| TcCLB.508033.69  | mucin-associated surface protein (MASP, pseudogene), pu   | 1,16  | 0,001991   |

|                  |                                                           |       |            |
|------------------|-----------------------------------------------------------|-------|------------|
| TcCLB.508501.80  | mucin-associated surface protein (MASP), putative         | 1,159 | 0,0000393  |
| TcCLB.506405.50  | serine-palmitoyl-CoA transferase, putative                | 1,158 | 9,76E-38   |
| TcCLB.511395.30  | protein phosphatase 2A, regulatory subunit B, putative    | 1,158 | 2,503E-35  |
| TcCLB.509973.70  | mucin-associated surface protein (MASP), putative         | 1,158 | 0,00000341 |
| TcCLB.506877.60  | mucin-associated surface protein (MASP), putative         | 1,158 | 0,009094   |
| TcCLB.510117.10  | retrotransposon hot spot protein (RHS, pseudogene), putat | 1,157 | 1,23E-12   |
| TcCLB.507011.10  | hypothetical protein, conserved                           | 1,156 | 1,06E-19   |
| TcCLB.509537.60  | meiosis recombination protein SPO11, putative             | 1,156 | 1,633E-18  |
| TcCLB.506179.10  | ferric reductase transmembrane protein, putative (FR1)    | 1,155 | 7,61E-45   |
| TcCLB.506775.14  | hypothetical protein, conserved                           | 1,155 | 5,375E-20  |
| TcCLB.509541.4   | paraflagellar rod component par4, putative                | 1,155 | 1,168E-07  |
| TcCLB.509153.50  | hypothetical protein, conserved                           | 1,154 | 1,694E-13  |
| TcCLB.504797.90  | hypothetical protein, conserved                           | 1,154 | 3,387E-10  |
| TcCLB.508983.10  | mucin-associated surface protein (MASP, pseudogene), pu   | 1,154 | 0,007514   |
| TcCLB.508495.30  | hypothetical protein                                      | 1,154 | 0,01598    |
| TcCLB.509237.120 | calpain-like cysteine peptidase, putative                 | 1,153 | 1,103E-35  |
| TcCLB.503771.74  | mucin TcMUCII (pseudogene), putative                      | 1,153 | 0,07706    |
| TcCLB.510101.420 | 40S ribosomal protein S21, putative                       | 1,152 | 1,279E-59  |
| TcCLB.510901.230 | hypothetical protein, conserved                           | 1,152 | 1,368E-17  |
| TcCLB.511815.80  | 3'a2rel-related protein, putative                         | 1,152 | 1,6E-09    |
| TcCLB.511223.20  | trans-sialidase, putative                                 | 1,152 | 0,143      |
| TcCLB.506925.110 | hypothetical protein, conserved                           | 1,151 | 7,651E-40  |
| TcCLB.509859.50  | hypothetical protein, conserved                           | 1,151 | 3,605E-11  |
| TcCLB.504343.10  | trans-sialidase, Group II, putative                       | 1,15  | 5,284E-08  |
| TcCLB.511077.90  | mucin TcMUCII, putative                                   | 1,15  | 0,01925    |
| TcCLB.504421.10  | serine/threonine protein kinase, putative                 | 1,149 | 1,089E-51  |
| TcCLB.509151.100 | hypothetical protein, conserved                           | 1,149 | 1,495E-15  |
| TcCLB.506713.24  | hypothetical protein, conserved                           | 1,149 | 9,237E-06  |
| TcCLB.508119.30  | mucin TcMUCII, putative                                   | 1,149 | 0,00005137 |
| TcCLB.508433.220 | mucin-associated surface protein (MASP), putative         | 1,149 | 0,06486    |
| TcCLB.509185.30  | trans-sialidase, Group II, putative                       | 1,149 | 0,4735     |
| TcCLB.510039.90  | 60S ribosomal protein L35, putative                       | 1,148 | 1,947E-54  |
| TcCLB.508729.18  | hypothetical protein, conserved                           | 1,148 | 1,151E-13  |
| TcCLB.510173.130 | hypothetical protein, conserved                           | 1,148 | 8,466E-12  |
| TcCLB.504341.20  | trans-sialidase, putative                                 | 1,148 | 0,4688     |
| TcCLB.507429.20  | mucin-associated surface protein (MASP), putative         | 1,147 | 0,0000398  |
| TcCLB.508873.514 | mucin TcMUC (pseudogene), putative                        | 1,147 | 0,04765    |
| TcCLB.511153.120 | pantothenate kinase subunit, putative                     | 1,146 | 2,658E-29  |
| TcCLB.510307.230 | trans-sialidase, Group II, putative                       | 1,146 | 0,00002498 |
| TcCLB.510039.36  | hypothetical protein                                      | 1,146 | 0,0001562  |
| TcCLB.476421.9   | protein kinase, putative                                  | 1,145 | 5,398E-15  |
| TcCLB.511321.60  | hypothetical protein, conserved                           | 1,145 | 0,0004598  |
| TcCLB.508631.20  | retrotransposon hot spot protein (RHS, pseudogene), putat | 1,144 | 1,207E-30  |
| TcCLB.509865.9   | retrotransposon hot spot (RHS) protein, putative          | 1,144 | 2,557E-22  |
| TcCLB.510039.50  | hypothetical protein, conserved                           | 1,144 | 1,227E-17  |

|                  |                                                           |       |            |
|------------------|-----------------------------------------------------------|-------|------------|
| TcCLB.506925.20  | hypothetical protein, conserved                           | 1,144 | 3,656E-17  |
| TcCLB.507769.20  | hypothetical protein, conserved                           | 1,143 | 2,494E-08  |
| TcCLB.503899.119 | trypanothione/tryparedoxin dependent peroxidase 2, putat  | 1,142 | 2,626E-29  |
| TcCLB.508569.80  | phosphoacetylglucosamine mutase, putative                 | 1,142 | 2,743E-20  |
| TcCLB.506339.10  | trans-sialidase, Group V, putative                        | 1,142 | 1,104E-06  |
| TcCLB.509427.80  | hypothetical protein                                      | 1,142 | 0,07225    |
| TcCLB.509891.40  | hypothetical protein, conserved                           | 1,141 | 6,241E-12  |
| TcCLB.510783.49  | cytochrome c oxidase subunit 10, putative                 | 1,141 | 0,00002761 |
| TcCLB.507047.40  | trans-sialidase, Group II, putative                       | 1,14  | 1,374E-11  |
| TcCLB.506825.180 | protein kinase, putative                                  | 1,139 | 1,745E-41  |
| TcCLB.507063.170 | hypothetical protein                                      | 1,139 | 0,00001642 |
| TcCLB.509081.100 | mucin TcMUCII, putative                                   | 1,139 | 0,002474   |
| TcCLB.455721.9   | cytochrome c oxidase subunit 10, putative                 | 1,138 | 4,202E-14  |
| TcCLB.508901.10  | hypothetical protein, conserved                           | 1,138 | 6,227E-10  |
| TcCLB.509437.103 | dispersed gene family protein 1 (DGF-1, pseudogene), puta | 1,138 | 0,02116    |
| TcCLB.508221.714 | retrotransposon hot spot protein (RHS, pseudogene), putat | 1,138 | 0,04549    |
| TcCLB.506751.50  | trans-sialidase, Group II, putative                       | 1,137 | 0,0009444  |
| TcCLB.511595.39  | mucin TcMUCII, putative                                   | 1,137 | 0,04913    |
| TcCLB.510173.90  | poly(ADP-ribose) polymerase, putative                     | 1,136 | 2,076E-21  |
| TcCLB.511183.450 | trans-sialidase (pseudogene), putative                    | 1,136 | 0,0000829  |
| TcCLB.506321.20  | mucin-associated surface protein (MASP), putative         | 1,136 | 0,0006423  |
| TcCLB.510311.100 | hypothetical protein, conserved                           | 1,135 | 7,166E-10  |
| TcCLB.511819.20  | hypothetical protein, conserved                           | 1,134 | 9,607E-25  |
| TcCLB.509601.40  | hypothetical protein, conserved                           | 1,133 | 1,422E-23  |
| TcCLB.506715.30  | hypothetical protein                                      | 1,133 | 2,599E-14  |
| TcCLB.511649.100 | amino acid permease, putative                             | 1,133 | 7,113E-11  |
| TcCLB.511263.40  | hypothetical protein, conserved                           | 1,133 | 0,07461    |
| TcCLB.510403.20  | retrotransposon hot spot protein (RHS, pseudogene), putat | 1,132 | 1,523E-18  |
| TcCLB.511603.470 | 90 kDa surface protein, putative                          | 1,132 | 0,0007626  |
| TcCLB.510101.240 | 60S ribosomal protein L24, putative                       | 1,131 | 1,872E-17  |
| TcCLB.511587.60  | retrotransposon hot spot protein (RHS, pseudogene), putat | 1,131 | 7,005E-14  |
| TcCLB.509461.40  | hypothetical protein, conserved                           | 1,131 | 3,637E-10  |
| TcCLB.510037.5   | elongation factor 1-gamma (EF-1-gamma), putative          | 1,131 | 3,309E-07  |
| TcCLB.508495.100 | trans-sialidase, Group V, putative                        | 1,131 | 0,0007988  |
| TcCLB.508761.20  | mucin TcMUCII, putative                                   | 1,131 | 0,004034   |
| TcCLB.506009.10  | hypothetical protein, conserved                           | 1,131 | 0,07059    |
| TcCLB.506775.110 | hypothetical protein, conserved                           | 1,13  | 3,756E-24  |
| TcCLB.506219.10  | hypothetical protein, conserved                           | 1,13  | 1,204E-18  |
| TcCLB.505097.35  | retrotransposon hot spot protein (RHS, pseudogene), putat | 1,13  | 1,063E-10  |
| TcCLB.509153.120 | acyl-CoA dehydrogenase, putative                          | 1,129 | 2,736E-26  |
| TcCLB.509915.60  | retrotransposon hot spot (RHS) protein, putative          | 1,129 | 1,144E-10  |
| TcCLB.508159.50  | mucin-associated surface protein (MASP, pseudogene), pu   | 1,129 | 0,002152   |
| TcCLB.506173.310 | mucin TcMUCII, putative                                   | 1,129 | 0,006075   |
| TcCLB.510371.30  | hypothetical protein, conserved (pseudogene)              | 1,129 | 0,1267     |
| TcCLB.509003.70  | beta tubulin (pseudogene), putative                       | 1,128 | 2,449E-36  |

|                  |                                                             |       |            |
|------------------|-------------------------------------------------------------|-------|------------|
| TcCLB.511815.180 | hypothetical protein, conserved                             | 1,128 | 1,64E-20   |
| TcCLB.507851.60  | hypothetical protein, conserved                             | 1,128 | 4,801E-16  |
| TcCLB.511923.110 | aspartate carbamoyltransferase, putative                    | 1,127 | 1,112E-14  |
| TcCLB.506661.40  | hypothetical protein, conserved                             | 1,127 | 1,188E-08  |
| TcCLB.503683.30  | RNA-binding protein, putative                               | 1,127 | 0,00003895 |
| TcCLB.508047.60  | trans-sialidase, Group V, putative                          | 1,127 | 0,0001365  |
| TcCLB.511149.70  | mucin TcMUCII, putative                                     | 1,127 | 0,02046    |
| TcCLB.508951.20  | hexokinase, putative                                        | 1,126 | 4,509E-35  |
| TcCLB.503595.10  | hypothetical protein, conserved                             | 1,126 | 8,677E-28  |
| TcCLB.510349.60  | hypothetical protein, conserved                             | 1,126 | 8,977E-06  |
| TcCLB.510693.190 | mucin-associated surface protein (MASP), putative           | 1,126 | 0,01924    |
| TcCLB.508119.100 | hypothetical protein, conserved                             | 1,125 | 8,04E-27   |
| TcCLB.506003.39  | trans-sialidase, putative (fragment)                        | 1,125 | 0,3952     |
| TcCLB.506123.24  | dynein light chain, putative                                | 1,124 | 6,891E-08  |
| TcCLB.510005.30  | retrotransposon hot spot protein (RHS, pseudogene), putat   | 1,124 | 1,422E-07  |
| TcCLB.508143.90  | trans-sialidase (pseudogene), putative                      | 1,124 | 7,838E-07  |
| TcCLB.510411.5   | retrotransposon hot spot protein (RHS, pseudogene), putat   | 1,124 | 0,02521    |
| TcCLB.509237.70  | UDP-Gal or UDP-GlcNAc-dependent glycosyltransferase, pu     | 1,123 | 0,00000736 |
| TcCLB.506825.150 | hypothetical protein, conserved                             | 1,122 | 1,373E-36  |
| TcCLB.508601.119 | ribose 5-phosphate isomerase, putative                      | 1,122 | 1,674E-14  |
| TcCLB.505939.80  | hypothetical protein, conserved                             | 1,122 | 9,772E-12  |
| TcCLB.507745.10  | mucin-associated surface protein (MASP, pseudogene), pu     | 1,122 | 0,00393    |
| TcCLB.506387.9   | chaperone DNAJ protein, putative                            | 1,121 | 0,0000267  |
| TcCLB.506919.120 | retrotransposon hot spot protein (RHS, pseudogene), putat   | 1,121 | 0,00004709 |
| TcCLB.506309.34  | mucin TcMUCII, putative                                     | 1,121 | 0,4171     |
| TcCLB.506281.70  | mucin TcMUCI, putative                                      | 1,12  | 0,02591    |
| TcCLB.507849.50  | cysteine proteinase, putative                               | 1,119 | 3,843E-34  |
| TcCLB.449247.20  | hypothetical protein, conserved                             | 1,119 | 6,647E-07  |
| TcCLB.506741.10  | trans-sialidase (pseudogene), putative                      | 1,119 | 0,0001763  |
| TcCLB.509207.100 | hypothetical protein, conserved                             | 1,118 | 1,42E-19   |
| TcCLB.510603.60  | protein tyrosine phosphatase-like protein, putative         | 1,118 | 3,431E-08  |
| TcCLB.506599.50  | mucin-associated surface protein (MASP), putative           | 1,118 | 0,007216   |
| TcCLB.508621.51  | peptidylprolyl isomerase-like protein (pseudogene), putativ | 1,118 | 0,1176     |
| TcCLB.508501.290 | Kinesin-13 1, putative (KIN13-1)                            | 1,117 | 1,469E-35  |
| TcCLB.506775.170 | NADH-cytochrome b5 reductase, putative                      | 1,117 | 2,149E-18  |
| TcCLB.509023.70  | hypothetical protein, conserved                             | 1,117 | 0,00002463 |
| TcCLB.506923.30  | hypothetical protein (pseudogene)                           | 1,117 | 0,005818   |
| TcCLB.510279.190 | mucin-associated surface protein (MASP), putative           | 1,117 | 0,007471   |
| TcCLB.507509.20  | hypothetical protein, conserved                             | 1,115 | 9,556E-20  |
| TcCLB.506401.330 | hypothetical protein, conserved                             | 1,115 | 6,384E-13  |
| TcCLB.508375.80  | hypothetical protein, conserved                             | 1,115 | 3,416E-10  |
| TcCLB.507133.20  | trans-sialidase, putative (fragment)                        | 1,115 | 7,509E-06  |
| TcCLB.508501.90  | hypothetical protein                                        | 1,115 | 0,01535    |
| TcCLB.511077.60  | mucin-associated surface protein (MASP), putative           | 1,115 | 0,08742    |
| TcCLB.508675.29  | calpain-like cysteine peptidase, putative                   | 1,114 | 9,319E-25  |

|                  |                                                           |       |            |
|------------------|-----------------------------------------------------------|-------|------------|
| TcCLB.508729.9   | hypothetical protein, conserved                           | 1,114 | 2,327E-08  |
| TcCLB.510387.40  | mucin-associated surface protein (MASP), putative         | 1,114 | 0,06471    |
| TcCLB.510101.390 | hypothetical protein, conserved                           | 1,113 | 2,176E-16  |
| TcCLB.510531.100 | hypothetical protein, conserved                           | 1,112 | 2,895E-31  |
| TcCLB.507683.40  | protein kinase, putative                                  | 1,112 | 4,991E-20  |
| TcCLB.440379.10  | trans-sialidase, putative (fragment)                      | 1,112 | 0,002836   |
| TcCLB.510205.70  | surface protease GP63, putative                           | 1,112 | 0,02268    |
| TcCLB.510583.10  | mucin TcMUCII, putative                                   | 1,111 | 0,04835    |
| TcCLB.504049.40  | retrotransposon hot spot protein (RHS, pseudogene), putat | 1,111 | 7,984E-15  |
| TcCLB.503767.10  | trans-sialidase, Group II, putative                       | 1,111 | 0,007351   |
| TcCLB.506959.70  | serine palmitoyltransferase, putative                     | 1,109 | 8,345E-30  |
| TcCLB.511827.120 | retrotransposon hot spot protein (RHS, pseudogene), putat | 1,109 | 1,457E-21  |
| TcCLB.506633.74  | hypothetical protein, conserved (pseudogene)              | 1,109 | 6,604E-10  |
| TcCLB.510773.120 | hypothetical protein                                      | 1,109 | 0,08502    |
| TcCLB.510101.170 | 40S ribosomal protein S5, putative                        | 1,108 | 4,53E-38   |
| TcCLB.506825.24  | hypothetical protein, conserved                           | 1,108 | 1,58E-17   |
| TcCLB.506401.210 | hypothetical protein, conserved                           | 1,108 | 4,096E-14  |
| TcCLB.509559.20  | retrotransposon hot spot protein (RHS, pseudogene), putat | 1,108 | 3,332E-13  |
| TcCLB.506649.20  | P-type H -ATPase, putative                                | 1,107 | 4,649E-30  |
| TcCLB.510039.64  | hypothetical protein, conserved                           | 1,107 | 7,819E-15  |
| TcCLB.509429.260 | hypothetical protein, conserved                           | 1,107 | 2,858E-14  |
| TcCLB.511217.10  | hypothetical protein                                      | 1,107 | 6,818E-11  |
| TcCLB.506957.100 | hypothetical protein, conserved                           | 1,107 | 4,284E-09  |
| TcCLB.504011.80  | hypothetical protein, conserved                           | 1,107 | 8,412E-08  |
| TcCLB.510521.10  | NADH-cytochrome b5 reductase (pseudogene), putative       | 1,106 | 3,612E-18  |
| TcCLB.507491.30  | hypothetical protein, conserved                           | 1,106 | 3,23E-16   |
| TcCLB.503559.90  | hypothetical protein, conserved                           | 1,106 | 9,354E-15  |
| TcCLB.506945.320 | hypothetical protein, conserved                           | 1,105 | 5,051E-28  |
| TcCLB.506295.160 | 2-oxoisovalerate dehydrogenase beta subunit, mitochondri  | 1,105 | 2,148E-20  |
| TcCLB.507783.10  | ribosomal P protein AGP2beta-1, putative                  | 1,105 | 0,00002319 |
| TcCLB.507479.70  | trans-sialidase, Group IV, putative                       | 1,105 | 0,00003114 |
| TcCLB.460197.10  | cysteine peptidase (pseudogene), putative                 | 1,105 | 0,002299   |
| TcCLB.508523.30  | trans-sialidase, Group II, putative                       | 1,105 | 0,01574    |
| TcCLB.508125.30  | mucin TcMUCII, putative                                   | 1,105 | 0,1717     |
| TcCLB.509617.20  | paraflagellar rod protein 3, putative (PAR3)              | 1,104 | 6,497E-26  |
| TcCLB.508039.10  | retrotransposon hot spot protein (RHS, pseudogene), putat | 1,104 | 2,585E-19  |
| TcCLB.510421.110 | hypothetical protein                                      | 1,104 | 3,839E-14  |
| TcCLB.510237.110 | mucin TcMUCII, putative                                   | 1,104 | 0,02411    |
| TcCLB.508637.90  | phosphoglucomutase                                        | 1,103 | 3,296E-19  |
| TcCLB.507167.110 | retrotransposon hot spot protein (RHS, pseudogene), putat | 1,103 | 2,464E-14  |
| TcCLB.503955.80  | hypothetical protein                                      | 1,103 | 2,995E-12  |
| TcCLB.510463.200 | mucin-associated surface protein (MASP), putative         | 1,103 | 0,03101    |
| TcCLB.509001.20  | hypothetical protein, conserved                           | 1,102 | 2,414E-20  |
| TcCLB.506623.40  | retrotransposon hot spot protein (RHS, pseudogene), putat | 1,102 | 5,463E-14  |
| TcCLB.503841.10  | proteasome activator protein pa26, putative               | 1,102 | 7,159E-14  |



|                  |                                                             |       |            |
|------------------|-------------------------------------------------------------|-------|------------|
| TcCLB.503605.20  | retrotransposon hot spot (RHS) protein, putative            | 1,102 | 0,00002532 |
| TcCLB.510557.70  | mucin TcMUCII, putative                                     | 1,102 | 0,0008045  |
| TcCLB.510121.90  | hypothetical protein, conserved                             | 1,101 | 3,741E-21  |
| TcCLB.503991.39  | 2,4-dihydroxyhept-2-ene-1,7-dioic acid aldolase, putative   | 1,1   | 2,329E-12  |
| TcCLB.509785.70  | retrotransposon hot spot (RHS) protein, putative            | 1,1   | 4,118E-08  |
| TcCLB.510543.70  | trans-sialidase, Group II, putative                         | 1,1   | 0,0009103  |
| TcCLB.506715.59  | Monooxygenase, putative                                     | 1,1   | 0,002511   |
| TcCLB.508873.240 | mucin TcMUCII, putative                                     | 1,1   | 0,01974    |
| TcCLB.503421.50  | retrotransposon hot spot protein (RHS, pseudogene), putat   | 1,099 | 2,58E-22   |
| TcCLB.510723.29  | 1-acyl-sn-glycerol-3-phosphate acyltransferase, putative (f | 1,099 | 2,149E-13  |
| TcCLB.511553.10  | mucin-associated surface protein (MASP), putative           | 1,099 | 0,00868    |
| TcCLB.511173.110 | mucin TcMUCII, putative                                     | 1,099 | 0,01939    |
| TcCLB.507615.100 | Present in the outer mitochondrial membrane proteome 2      | 1,098 | 2,572E-34  |
| TcCLB.508547.170 | hypothetical protein, conserved                             | 1,098 | 6,723E-33  |
| TcCLB.506825.130 | hypothetical protein, conserved                             | 1,098 | 2,345E-20  |
| TcCLB.506563.50  | calpain-like cysteine peptidase (pseudogene), putative      | 1,098 | 9,952E-11  |
| TcCLB.503677.20  | DNA repair and recombination helicase protein PIF4, putat   | 1,098 | 3,931E-09  |
| TcCLB.509753.150 | mucin TcMUCII, putative                                     | 1,098 | 0,1934     |
| TcCLB.511889.11  | trans-sialidase (pseudogene), putative                      | 1,097 | 1,573E-16  |
| TcCLB.508041.20  | hypothetical protein, conserved                             | 1,097 | 3,058E-14  |
| TcCLB.506895.80  | trans-sialidase, putative                                   | 1,097 | 0,00002227 |
| TcCLB.511827.139 | retrotransposon hot spot protein (RHS, pseudogene), putat   | 1,097 | 0,001952   |
| TcCLB.511393.60  | protein kinase, putative                                    | 1,096 | 6,406E-23  |
| TcCLB.508741.440 | surface antigen TASV, putative                              | 1,096 | 2,53E-21   |
| TcCLB.507221.20  | poly(A)-specific ribonuclease PARN, putative                | 1,096 | 1,528E-16  |
| TcCLB.509259.160 | retrotransposon hot spot (RHS) protein, putative            | 1,096 | 1,636E-16  |
| TcCLB.508569.100 | hypothetical protein, conserved                             | 1,096 | 1,169E-11  |
| TcCLB.511755.80  | formin, putative                                            | 1,096 | 9,044E-06  |
| TcCLB.509149.50  | hypothetical protein, conserved                             | 1,095 | 5,751E-28  |
| TcCLB.509601.10  | neutral sphingomyelinase activation associated factor-like  | 1,095 | 7,918E-13  |
| TcCLB.507603.190 | hypothetical protein, conserved                             | 1,094 | 1,237E-13  |
| TcCLB.510925.9   | dispersed gene family protein 1 (DGF-1), putative (fragme   | 1,094 | 0,03056    |
| TcCLB.503525.4   | hypothetical protein, conserved                             | 1,093 | 4,673E-19  |
| TcCLB.511065.10  | STOP axonemal protein, putative                             | 1,093 | 9,044E-19  |
| TcCLB.511667.20  | retrotransposon hot spot (RHS) protein, putative            | 1,093 | 3,22E-10   |
| TcCLB.506053.50  | trans-sialidase, Group IV, putative                         | 1,093 | 0,00202    |
| TcCLB.507411.20  | retrotransposon hot spot (RHS) protein, putative            | 1,092 | 0,0004637  |
| TcCLB.507533.21  | clathrin assembly protein (pseudogene), putative            | 1,091 | 5,773E-38  |
| TcCLB.508527.39  | retrotransposon hot spot (RHS) protein, putative, (fragmer  | 1,091 | 5,921E-13  |
| TcCLB.504045.80  | hypothetical protein, conserved                             | 1,091 | 6,394E-10  |
| TcCLB.506183.40  | retrotransposon hot spot protein (RHS, pseudogene), putat   | 1,091 | 3,436E-07  |
| TcCLB.506737.128 | mucin TcMUCl, putative                                      | 1,091 | 0,0003405  |
| TcCLB.507067.20  | surface protease GP63, putative                             | 1,091 | 0,001952   |
| TcCLB.506801.110 | hypothetical protein, conserved                             | 1,09  | 5,812E-10  |
| TcCLB.504605.10  | retrotransposon hot spot (RHS) protein, putative (fragmeni  | 1,09  | 9,441E-09  |

|                  |                                                           |       |            |
|------------------|-----------------------------------------------------------|-------|------------|
| TcCLB.511223.10  | hypothetical protein                                      | 1,09  | 0,02317    |
| TcCLB.504187.10  | retrotransposon hot spot protein (RHS, pseudogene), putat | 1,09  | 0,03178    |
| TcCLB.510699.80  | mucin-associated surface protein (MASP), putative         | 1,09  | 0,09162    |
| TcCLB.509139.10  | glycerate kinase, putative                                | 1,089 | 1,64E-42   |
| TcCLB.506825.210 | hypothetical protein, conserved                           | 1,089 | 2,041E-31  |
| TcCLB.511825.20  | hypothetical protein, conserved                           | 1,089 | 2,282E-11  |
| TcCLB.509661.21  | ferric reductase (pseudogene), putative                   | 1,089 | 1,037E-07  |
| TcCLB.504769.5   | hypothetical protein                                      | 1,089 | 1,269E-07  |
| TcCLB.507091.160 | trans-sialidase (pseudogene), putative                    | 1,089 | 4,382E-07  |
| TcCLB.511001.240 | proteasome activator protein pa26, putative               | 1,089 | 3,458E-06  |
| TcCLB.506871.190 | hypothetical protein                                      | 1,089 | 4,327E-06  |
| TcCLB.510101.180 | 40S ribosomal protein S5, putative                        | 1,089 | 0,0005418  |
| TcCLB.509187.20  | retrotransposon hot spot protein (RHS, pseudogene), putat | 1,089 | 0,03729    |
| TcCLB.511613.151 | syntaxin binding protein (pseudogene), putative           | 1,089 | 0,08542    |
| TcCLB.508221.910 | mucin TcMUCII, putative                                   | 1,088 | 0,09511    |
| TcCLB.511823.70  | farnesyl pyrophosphate synthase                           | 1,087 | 1,679E-18  |
| TcCLB.510689.14  | NADH-ubiquinone oxidoreductase complex I subunit, putati  | 1,087 | 3,309E-13  |
| TcCLB.508201.30  | mucin-associated surface protein (MASP), putative         | 1,087 | 7,582E-06  |
| TcCLB.510377.200 | mucin-associated surface protein (MASP), putative         | 1,087 | 0,02026    |
| TcCLB.506925.530 | glycosomal transporter (GAT3), putative                   | 1,086 | 4,33E-41   |
| TcCLB.504797.14  | hypothetical protein, conserved                           | 1,085 | 4,83E-10   |
| TcCLB.463155.20  | retrotransposon hot spot (RHS) protein, putative          | 1,084 | 3,592E-43  |
| TcCLB.508857.30  | trans-sialidase, Group I, putative                        | 1,084 | 4,119E-12  |
| TcCLB.508023.140 | dispersed gene family protein 1 (DGF-1), putative         | 1,083 | 6,947E-09  |
| TcCLB.508511.30  | mucin TcMUCII, putative                                   | 1,083 | 0,05086    |
| TcCLB.508221.550 | mucin-associated surface protein (MASP), putative         | 1,083 | 0,1507     |
| TcCLB.506773.160 | hypothetical protein, conserved                           | 1,082 | 8,358E-21  |
| TcCLB.506325.30  | hypothetical protein, conserved (pseudogene)              | 1,082 | 1,257E-10  |
| TcCLB.456139.10  | hypothetical protein, conserved                           | 1,082 | 0,0001814  |
| TcCLB.510687.60  | hypothetical protein, conserved                           | 1,081 | 9,051E-22  |
| TcCLB.509561.30  | citrate transporter, putative                             | 1,081 | 3,999E-11  |
| TcCLB.509667.20  | tryptophanyl-tRNA synthetase (pseudogene), putative       | 1,081 | 7,028E-06  |
| TcCLB.509871.70  | retrotransposon hot spot protein (RHS, pseudogene), putat | 1,08  | 8,337E-10  |
| TcCLB.511007.20  | retrotransposon hot spot (RHS) protein, putative          | 1,08  | 0,00000165 |
| TcCLB.506183.70  | beta galactofuranosyl glycosyltransferase, putative       | 1,078 | 9,341E-13  |
| TcCLB.506433.10  | retrotransposon hot spot protein (RHS, pseudogene), putat | 1,078 | 2,333E-09  |
| TcCLB.508465.100 | hypothetical protein                                      | 1,078 | 8,064E-08  |
| TcCLB.506763.260 | mucin-associated surface protein (MASP), putative         | 1,078 | 0,0009327  |
| TcCLB.507163.30  | 90 kDa surface protein, putative                          | 1,076 | 0,06654    |
| TcCLB.510859.30  | hypothetical protein, conserved                           | 1,075 | 6,491E-38  |
| TcCLB.509979.30  | hypothetical protein, conserved                           | 1,075 | 6,457E-26  |
| TcCLB.507891.47  | flagellar calcium-binding protein, putative               | 1,075 | 2,223E-24  |
| TcCLB.507021.40  | hypothetical protein, conserved                           | 1,075 | 1,096E-09  |
| TcCLB.509979.10  | hypothetical protein, conserved                           | 1,074 | 1,545E-33  |
| TcCLB.508663.10  | mucin TcMUC (pseudogene), putative                        | 1,074 | 2,947E-19  |

|                  |                                                             |       |            |
|------------------|-------------------------------------------------------------|-------|------------|
| TcCLB.507801.210 | retrotransposon hot spot protein (RHS, pseudogene), putat   | 1,074 | 0,00004087 |
| TcCLB.508001.50  | trans-sialidase (pseudogene), putative                      | 1,074 | 0,03016    |
| TcCLB.482097.20  | hypothetical protein, conserved                             | 1,074 | 0,03147    |
| TcCLB.510483.310 | mucin-associated surface protein (MASP), putative           | 1,074 | 0,04361    |
| TcCLB.507637.100 | mucin TcMUCII, putative                                     | 1,074 | 0,05984    |
| TcCLB.506773.140 | DNA ligase, putative                                        | 1,073 | 1,346E-17  |
| TcCLB.509317.50  | Asparagine-linked glycosylation protein 12 (ALG12)          | 1,073 | 9,006E-16  |
| TcCLB.509065.50  | hypothetical protein, conserved                             | 1,073 | 1,501E-12  |
| TcCLB.506669.4   | MFS transporter, putative                                   | 1,073 | 0,0009286  |
| TcCLB.507069.60  | mucin TcMUCII, putative                                     | 1,073 | 0,05326    |
| TcCLB.511395.40  | hypothetical protein                                        | 1,072 | 1,711E-29  |
| TcCLB.508065.50  | phosphatidylinositol-4-phosphate 5-kinase-like protein, put | 1,072 | 8,679E-23  |
| TcCLB.506513.7   | hypothetical protein, conserved                             | 1,072 | 1,189E-13  |
| TcCLB.508541.20  | mucin-associated surface protein (MASP), putative           | 1,072 | 0,02145    |
| TcCLB.503843.20  | hypothetical protein, conserved                             | 1,071 | 1,236E-22  |
| TcCLB.509019.21  | retrotransposon hot spot protein (RHS, pseudogene), putat   | 1,071 | 1,528E-10  |
| TcCLB.510801.10  | calpain-like cysteine peptidase, putative (fragment)        | 1,071 | 8,777E-08  |
| TcCLB.503613.70  | hypothetical protein, conserved                             | 1,071 | 2,787E-06  |
| TcCLB.511373.10  | mucin-associated surface protein (MASP, pseudogene), pu     | 1,071 | 0,2217     |
| TcCLB.511175.10  | mucin-associated surface protein (MASP), putative           | 1,071 | 0,3842     |
| TcCLB.508851.160 | hypothetical protein, conserved                             | 1,07  | 8,374E-24  |
| TcCLB.504153.180 | UDP-N-acetylglucosamine pyrophosphorylase, putative         | 1,07  | 6,244E-18  |
| TcCLB.433559.10  | trans-sialidase, putative (fragment)                        | 1,07  | 0,1952     |
| TcCLB.510347.50  | hypothetical protein, conserved                             | 1,069 | 5,375E-20  |
| TcCLB.511825.4   | hypothetical protein, conserved (fragment)                  | 1,069 | 3,695E-14  |
| TcCLB.506571.10  | dispersed gene family protein 1 (DGF-1), putative           | 1,069 | 1,702E-07  |
| TcCLB.510101.260 | hypothetical protein, conserved                             | 1,068 | 1,623E-19  |
| TcCLB.510861.40  | hypothetical protein, conserved                             | 1,068 | 6,751E-17  |
| TcCLB.506359.70  | hypothetical protein, conserved                             | 1,068 | 7,365E-08  |
| TcCLB.506563.40  | beta tubulin, putative                                      | 1,067 | 9,768E-17  |
| TcCLB.506933.43  | hypothetical protein, conserved                             | 1,067 | 5,23E-14   |
| TcCLB.508313.40  | mucin TcMUCII, putative                                     | 1,066 | 0,0228     |
| TcCLB.509149.40  | 60S ribosomal protein L19, putative                         | 1,065 | 9,458E-72  |
| TcCLB.504797.110 | hypothetical protein, conserved                             | 1,065 | 4,051E-22  |
| TcCLB.507673.70  | hypothetical protein, conserved                             | 1,065 | 1,597E-13  |
| TcCLB.506283.10  | retrotransposon hot spot protein (RHS, pseudogene), putat   | 1,065 | 8,66E-11   |
| TcCLB.506951.103 | hypothetical protein                                        | 1,065 | 0,1243     |
| TcCLB.509419.94  | mucin TcMUCII (pseudogene), putative                        | 1,065 | 0,1866     |
| TcCLB.510585.10  | mucin-associated surface protein (MASP, pseudogene), pu     | 1,065 | 0,2032     |
| TcCLB.506599.91  | surface protease GP63 (pseudogene), putative                | 1,065 | 0,2118     |
| TcCLB.508359.50  | mucin TcMUCII, putative                                     | 1,064 | 0,1228     |
| TcCLB.504127.30  | trans-sialidase (pseudogene), putative                      | 1,063 | 3,115E-20  |
| TcCLB.506983.39  | calpain-like cysteine peptidase, putative                   | 1,063 | 2,731E-17  |
| TcCLB.510139.50  | retrotransposon hot spot protein (RHS, pseudogene), putat   | 1,063 | 1,288E-07  |
| TcCLB.510889.231 | ATP synthase subunit, putative                              | 1,063 | 0,00001006 |

|                  |                                                           |       |           |
|------------------|-----------------------------------------------------------|-------|-----------|
| TcCLB.509207.70  | hypothetical protein, conserved                           | 1,062 | 1,561E-17 |
| TcCLB.510411.30  | retrotransposon hot spot protein (RHS, pseudogene), putat | 1,062 | 0,0001119 |
| TcCLB.508885.20  | mucin TcMUCI, putative                                    | 1,062 | 0,1268    |
| TcCLB.508883.10  | mucin-associated surface protein (MASP, pseudogene), pu   | 1,062 | 0,2833    |
| TcCLB.511825.200 | 60S ribosomal protein L14, putative                       | 1,061 | 2,409E-39 |
| TcCLB.507659.30  | amino acid transporter, putative (fragment)               | 1,061 | 2,319E-36 |
| TcCLB.507611.10  | retrotransposon hot spot (RHS) protein, putative          | 1,061 | 4,243E-35 |
| TcCLB.506777.50  | cell cycle sequence binding phosphoprotein (RBP45), putat | 1,061 | 1,666E-18 |
| TcCLB.508045.100 | mitochondrial DNA primase, putative (PRI1)                | 1,06  | 9,273E-23 |
| TcCLB.504231.30  | hypothetical protein, conserved                           | 1,06  | 8,012E-21 |
| TcCLB.503477.20  | transaldolase, putative                                   | 1,06  | 9,114E-18 |
| TcCLB.507515.10  | glutathione peroxidase-like protein, putative             | 1,06  | 3,999E-15 |
| TcCLB.506183.15  | trans-sialidase (pseudogene), putative                    | 1,06  | 0,01338   |
| TcCLB.509773.20  | protein kinase, putative                                  | 1,06  | 0,01736   |
| TcCLB.504087.20  | hypothetical protein                                      | 1,058 | 6,686E-36 |
| TcCLB.506051.10  | retrotransposon hot spot protein (RHS, pseudogene), putat | 1,058 | 1,529E-07 |
| TcCLB.507875.170 | ribosomal P protein AGP2beta-1, putative                  | 1,058 | 8,308E-06 |
| TcCLB.506801.60  | mucin-like glycoprotein, putative                         | 1,058 | 0,001677  |
| TcCLB.508495.20  | trans-sialidase (pseudogene), putative                    | 1,057 | 3,981E-11 |
| TcCLB.507163.50  | mucin TcMUCII, putative                                   | 1,057 | 0,04773   |
| TcCLB.508041.50  | hypothetical protein, conserved                           | 1,056 | 1,011E-23 |
| TcCLB.507601.70  | dihydrolipoamide branched chain transacylase, putative    | 1,056 | 4,274E-17 |
| TcCLB.507165.30  | hypothetical protein, conserved                           | 1,056 | 1,197E-13 |
| TcCLB.510861.125 | hypothetical protein, conserved                           | 1,055 | 2,057E-13 |
| TcCLB.508029.10  | Hydroxymethylglutaryl-CoA lyase, mitochondrial, putative  | 1,055 | 5,679E-13 |
| TcCLB.433237.10  | hypothetical protein                                      | 1,055 | 0,231     |
| TcCLB.509901.100 | hypothetical protein, conserved                           | 1,054 | 6,2E-31   |
| TcCLB.509331.20  | hypothetical protein, conserved                           | 1,054 | 3,242E-14 |
| TcCLB.511827.70  | hypothetical protein, conserved                           | 1,054 | 3,837E-12 |
| TcCLB.507633.120 | mucin TcMUCII, putative                                   | 1,054 | 0,04575   |
| TcCLB.509155.10  | hypothetical protein, conserved                           | 1,053 | 2,994E-34 |
| TcCLB.506975.80  | trans-sialidase, Group I, putative                        | 1,053 | 1,702E-07 |
| TcCLB.510349.80  | protein kinase, putative                                  | 1,052 | 6,208E-27 |
| TcCLB.508037.10  | retrotransposon hot spot (RHS) protein, putative          | 1,052 | 5,522E-17 |
| TcCLB.509081.130 | surface protease GP63 (pseudogene), putative              | 1,052 | 0,2274    |
| TcCLB.504177.20  | fatty acyl CoA synthetase 2, putative                     | 1,051 | 3,419E-22 |
| TcCLB.511291.40  | protein kinase, putative                                  | 1,051 | 8,479E-20 |
| TcCLB.509271.10  | trans-sialidase, putative                                 | 1,051 | 3,001E-14 |
| TcCLB.508239.49  | dynein regulatory complex subunit, putative               | 1,051 | 1,22E-09  |
| TcCLB.507871.9   | dispersed gene family protein 1 (DGF-1), putative         | 1,051 | 0,04034   |
| TcCLB.504033.40  | hypothetical protein                                      | 1,05  | 1,947E-20 |
| TcCLB.511081.30  | mucin TcMUCII, putative                                   | 1,05  | 0,0414    |
| TcCLB.504769.150 | hypothetical protein                                      | 1,05  | 0,1104    |
| TcCLB.504191.10  | sterol 24-c-methyltransferase, putative                   | 1,049 | 3,218E-38 |
| TcCLB.511825.230 | hypothetical protein                                      | 1,049 | 8,077E-13 |

|                  |                                                            |       |            |
|------------------|------------------------------------------------------------|-------|------------|
| TcCLB.511211.90  | surface protease GP63, putative                            | 1,049 | 1,958E-06  |
| TcCLB.506245.220 | mucin TcMUCII, putative                                    | 1,049 | 0,1621     |
| TcCLB.430605.40  | ERV/ALR sulfhydryl oxidase domain-containing protein (PC   | 1,048 | 2,748E-14  |
| TcCLB.503445.20  | trans-sialidase (pseudogene), putative                     | 1,048 | 3,473E-10  |
| TcCLB.418185.21  | retrotransposon hot spot protein (RHS, pseudogene), putat  | 1,048 | 0,0003742  |
| TcCLB.508289.9   | mucin-associated surface protein (MASP), putative          | 1,048 | 0,2625     |
| TcCLB.511019.40  | retrotransposon hot spot protein (RHS, pseudogene), putat  | 1,047 | 2,253E-47  |
| TcCLB.507001.110 | galactokinase-like protein, putative                       | 1,047 | 1,253E-16  |
| TcCLB.510759.10  | hypothetical protein, conserved                            | 1,047 | 1,381E-13  |
| TcCLB.503465.40  | hypothetical protein                                       | 1,047 | 5,188E-08  |
| TcCLB.511287.70  | hypothetical protein, conserved                            | 1,047 | 1,179E-06  |
| TcCLB.424499.10  | mucin-associated surface protein (MASP), putative          | 1,047 | 0,06249    |
| TcCLB.509733.199 | Exradiol ring-cleavage dioxygenase, putative               | 1,046 | 3,165E-14  |
| TcCLB.511711.110 | TLR4 regulator and MIR-interacting MSAP, putative (ESP16   | 1,046 | 2,455E-12  |
| TcCLB.510287.50  | hypothetical protein, conserved                            | 1,046 | 6,049E-09  |
| TcCLB.510155.10  | hypothetical protein, conserved                            | 1,045 | 1,223E-47  |
| TcCLB.506537.299 | retrotransposon hot spot (RHS) protein, putative           | 1,045 | 9,621E-24  |
| TcCLB.404843.20  | hypothetical protein, conserved                            | 1,045 | 1,04E-19   |
| TcCLB.506615.10  | trans-sialidase (pseudogene), putative                     | 1,045 | 1,564E-10  |
| TcCLB.504157.10  | heterogeneous nuclear ribonucleoprotein H/F, putative      | 1,044 | 1,253E-15  |
| TcCLB.508627.40  | trans-sialidase, Group VIII, putative                      | 1,044 | 4,733E-11  |
| TcCLB.507275.24  | ubiquitin fold modifier protein, putative (UFM1)           | 1,044 | 1,321E-07  |
| TcCLB.504579.10  | retrotransposon hot spot protein (RHS, pseudogene), putat  | 1,044 | 1,386E-07  |
| TcCLB.506825.140 | hypothetical protein, conserved                            | 1,043 | 6,874E-13  |
| TcCLB.503761.30  | mucin TcMUCII, putative                                    | 1,043 | 0,0694     |
| TcCLB.509461.70  | hypothetical protein, conserved                            | 1,042 | 7,619E-19  |
| TcCLB.506773.110 | hypothetical protein, conserved                            | 1,04  | 1,265E-16  |
| TcCLB.509363.20  | retrotransposon hot spot protein (RHS, pseudogene), putat  | 1,04  | 0,06265    |
| TcCLB.510859.40  | hypothetical protein, conserved                            | 1,039 | 3,147E-13  |
| TcCLB.510377.300 | trans-sialidase (pseudogene), putative                     | 1,039 | 0,01961    |
| TcCLB.507603.260 | cysteine peptidase, putative                               | 1,039 | 0,06318    |
| TcCLB.511149.130 | mucin TcMUCl, putative                                     | 1,039 | 0,307      |
| TcCLB.506577.90  | retrotransposon hot spot protein (RHS, pseudogene), putat  | 1,038 | 4,225E-15  |
| TcCLB.507691.40  | trans-sialidase (pseudogene), putative                     | 1,038 | 1,146E-07  |
| TcCLB.511127.74  | hypothetical protein, conserved                            | 1,038 | 3,203E-07  |
| TcCLB.510845.10  | retrotransposon hot spot (RHS) protein, putative (fragmen  | 1,038 | 0,00003138 |
| TcCLB.511081.10  | mucin-associated surface protein (MASP), putative          | 1,038 | 0,006627   |
| TcCLB.509153.70  | exosome-associated protein 3, putative (EAP3)              | 1,037 | 5,523E-14  |
| TcCLB.511431.60  | hypothetical protein, conserved                            | 1,037 | 2,569E-07  |
| TcCLB.508633.130 | 90 kDa surface protein, putative                           | 1,037 | 0,006326   |
| TcCLB.506767.170 | trans-sialidase (pseudogene), putative                     | 1,037 | 0,008499   |
| TcCLB.505699.10  | trans-sialidase, putative                                  | 1,036 | 2,116E-06  |
| TcCLB.508521.50  | surface protease GP63 (pseudogene), putative               | 1,036 | 0,0003582  |
| TcCLB.509617.10  | paraflagellar rod protein 3, putative (pseudogene) (PAR3)  | 1,035 | 1,089E-18  |
| TcCLB.507821.70  | dispersed gene family protein 1 (DGF-1, pseudogene), putat | 1,035 | 6,663E-07  |

|                  |                                                                  |       |            |
|------------------|------------------------------------------------------------------|-------|------------|
| TcCLB.510669.20  | Gim5A protein, putative                                          | 1,034 | 4,078E-25  |
| TcCLB.510225.59  | transporter, putative                                            | 1,034 | 0,00004122 |
| TcCLB.510951.10  | hypothetical protein, conserved                                  | 1,034 | 0,001416   |
| TcCLB.506501.27  | syntaxin binding protein (pseudogene), putative                  | 1,034 | 0,1923     |
| TcCLB.508569.120 | hypothetical protein, conserved                                  | 1,033 | 7,345E-19  |
| TcCLB.510511.9   | Na/H antiporter-like protein, putative                           | 1,033 | 2,332E-07  |
| TcCLB.505937.80  | retrotransposon hot spot protein (RHS, pseudogene), putative     | 1,033 | 0,00001886 |
| TcCLB.505925.10  | trans-sialidase, putative (fragment)                             | 1,033 | 0,00003709 |
| TcCLB.508873.70  | mucin-associated surface protein (MASP, pseudogene), putative    | 1,033 | 0,0396     |
| TcCLB.507937.14  | mucin TcMUCII (pseudogene), putative                             | 1,033 | 0,07871    |
| TcCLB.507665.30  | ferric reductase transmembrane protein, putative (FR1)           | 1,032 | 1,466E-25  |
| TcCLB.503453.100 | serine palmitoyltransferase, putative                            | 1,032 | 2,047E-20  |
| TcCLB.507559.70  | hypothetical protein, conserved                                  | 1,032 | 5,708E-11  |
| TcCLB.508119.180 | hypothetical protein, conserved                                  | 1,032 | 5,726E-07  |
| TcCLB.503715.30  | ras-related protein RAB1A, putative (Rab1A)                      | 1,031 | 2,15E-35   |
| TcCLB.506163.50  | hypothetical protein, conserved                                  | 1,031 | 4,506E-18  |
| TcCLB.507473.20  | hypothetical protein                                             | 1,031 | 3,482E-10  |
| TcCLB.506595.40  | trans-sialidase, Group II, putative                              | 1,031 | 3,524E-08  |
| TcCLB.509233.20  | retrotransposon hot spot protein (RHS, pseudogene), putative     | 1,031 | 1,102E-06  |
| TcCLB.509779.10  | DNA repair protein, putative                                     | 1,03  | 1,036E-19  |
| TcCLB.510373.30  | 90 kDa surface protein, putative                                 | 1,03  | 0,08441    |
| TcCLB.507643.60  | trans-sialidase (pseudogene), putative                           | 1,029 | 4,912E-06  |
| TcCLB.507213.40  | trans-sialidase, Group II, putative                              | 1,029 | 0,0005977  |
| TcCLB.510101.270 | hypothetical protein, conserved                                  | 1,027 | 9,669E-15  |
| TcCLB.509395.100 | cytochrome b-domain protein, putative                            | 1,027 | 6,554E-10  |
| TcCLB.503929.5   | hypothetical protein, conserved                                  | 1,027 | 4,398E-07  |
| TcCLB.511173.400 | mucin-associated surface protein (MASP), putative                | 1,027 | 0,1417     |
| TcCLB.503401.40  | glycosyl transferase, putative                                   | 1,026 | 4,469E-29  |
| TcCLB.510861.94  | hypothetical protein, conserved                                  | 1,026 | 1,426E-25  |
| TcCLB.511821.130 | hypothetical protein                                             | 1,026 | 1,808E-21  |
| TcCLB.511305.10  | 5'-3' exoribonuclease B, putative                                | 1,026 | 6,491E-14  |
| TcCLB.505193.70  | hypothetical protein, conserved                                  | 1,026 | 2,013E-13  |
| TcCLB.506401.190 | hypothetical protein, conserved                                  | 1,026 | 1,164E-12  |
| TcCLB.504787.99  | mucin TcMUCII, putative                                          | 1,026 | 0,04021    |
| TcCLB.509769.60  | succinate dehydrogenase iron-sulfur subunit (SDH2N)              | 1,025 | 1,771E-27  |
| TcCLB.511807.253 | hypothetical protein, conserved                                  | 1,025 | 6,37E-18   |
| TcCLB.505171.90  | hypothetical protein                                             | 1,025 | 1,659E-11  |
| TcCLB.507221.70  | hypothetical protein, conserved                                  | 1,025 | 1,055E-09  |
| TcCLB.503929.79  | serine-palmitoyl-CoA transferase, putative                       | 1,025 | 9,226E-08  |
| TcCLB.508501.240 | hypothetical protein, conserved                                  | 1,025 | 1,939E-06  |
| TcCLB.511603.420 | syntaxin binding protein (pseudogene), putative                  | 1,025 | 0,09752    |
| TcCLB.509481.10  | trans-sialidase, putative                                        | 1,025 | 0,1238     |
| TcCLB.506905.30  | hypothetical protein, conserved                                  | 1,024 | 2,213E-12  |
| TcCLB.510879.180 | hypothetical protein                                             | 1,024 | 1,013E-11  |
| TcCLB.506595.60  | beta galactofuranosyl glycosyltransferase (pseudogene), putative | 1,024 | 2,859E-09  |

|                  |                                                                  |       |            |
|------------------|------------------------------------------------------------------|-------|------------|
| TcCLB.504033.130 | spermidine synthase, putative                                    | 1,024 | 0,0003186  |
| TcCLB.511787.10  | mucin-associated surface protein (MASP), putative                | 1,024 | 0,2041     |
| TcCLB.509875.50  | beta galactofuranosyl glycosyltransferase, putative              | 1,023 | 0,0006008  |
| TcCLB.510465.60  | hypothetical protein, conserved (pseudogene)                     | 1,023 | 0,006915   |
| TcCLB.511517.30  | hypothetical protein, conserved                                  | 1,021 | 1,045E-14  |
| TcCLB.509491.20  | hypothetical protein, conserved (pseudogene)                     | 1,021 | 4,629E-14  |
| TcCLB.507747.230 | acid phosphatase type 5, putative                                | 1,021 | 1,798E-10  |
| TcCLB.511261.20  | chaperone DNAJ protein, putative                                 | 1,02  | 4,908E-16  |
| TcCLB.507867.60  | protein phosphatase 1, regulatory subunit, putative              | 1,02  | 8,356E-16  |
| TcCLB.506467.40  | serine/threonine protein kinase, putative                        | 1,019 | 3,879E-19  |
| TcCLB.511585.110 | hypothetical protein                                             | 1,019 | 2,624E-18  |
| TcCLB.509151.60  | hypothetical protein, conserved                                  | 1,019 | 3,335E-17  |
| TcCLB.476125.9   | dispersed gene family protein 1 (DGF-1), putative                | 1,019 | 0,0002091  |
| TcCLB.509009.10  | dynein heavy chain, cytosolic, putative                          | 1,018 | 7,73E-11   |
| TcCLB.511117.10  | retrotransposon hot spot protein (RHS, pseudogene), putative     | 1,018 | 6,137E-10  |
| TcCLB.507559.110 | surface protease GP63, putative                                  | 1,018 | 3,966E-07  |
| TcCLB.509757.49  | L-ribulokinase, putative                                         | 1,018 | 0,006249   |
| TcCLB.507559.60  | hypothetical protein, conserved                                  | 1,017 | 3,785E-18  |
| TcCLB.506595.30  | retrotransposon hot spot protein (RHS, pseudogene), putative     | 1,017 | 5,294E-12  |
| TcCLB.511545.130 | hypothetical protein, conserved                                  | 1,017 | 2,603E-11  |
| TcCLB.511825.250 | hypothetical protein, conserved                                  | 1,017 | 9,586E-09  |
| TcCLB.504827.159 | hypothetical protein, conserved                                  | 1,017 | 2,444E-07  |
| TcCLB.509725.30  | hypothetical protein, conserved (pseudogene)                     | 1,017 | 4,617E-06  |
| TcCLB.508125.50  | mucin-associated surface protein (MASP, pseudogene), putative    | 1,017 | 0,04565    |
| TcCLB.507637.130 | mucin TcMUCII, putative                                          | 1,017 | 0,08822    |
| TcCLB.510627.70  | hypothetical protein, conserved (pseudogene)                     | 1,017 | 0,08948    |
| TcCLB.506771.9   | hypothetical protein, conserved                                  | 1,016 | 3,227E-14  |
| TcCLB.503739.10  | beta galactofuranosyl glycosyltransferase (pseudogene), putative | 1,016 | 0,01884    |
| TcCLB.506537.180 | retrotransposon hot spot protein (RHS, pseudogene), putative     | 1,015 | 7,537E-22  |
| TcCLB.507615.76  | hypothetical protein, conserved                                  | 1,015 | 4,629E-12  |
| TcCLB.511753.40  | hypothetical protein, conserved                                  | 1,015 | 0,00003437 |
| TcCLB.511693.50  | hypothetical protein, conserved                                  | 1,014 | 2,53E-18   |
| TcCLB.504229.110 | amino acid permease 24, putative (AAP24)                         | 1,014 | 6,333E-09  |
| TcCLB.509295.30  | trans-sialidase (pseudogene), putative                           | 1,014 | 0,000268   |
| TcCLB.509753.240 | mucin TcMUCII, putative                                          | 1,014 | 0,3519     |
| TcCLB.506579.10  | ABC transporter, putative                                        | 1,013 | 1,269E-34  |
| TcCLB.510101.59  | palmitoyl acyltransferase 7, putative                            | 1,013 | 1,415E-17  |
| TcCLB.506617.90  | ATP-dependent Clp protease subunit, heat shock protein 100       | 1,013 | 3,74E-10   |
| TcCLB.508297.61  | choline ethanolamine kinase, putative                            | 1,013 | 0,0007211  |
| TcCLB.507429.40  | mucin-associated surface protein (MASP, pseudogene), putative    | 1,013 | 0,002406   |
| TcCLB.511123.11  | trans-sialidase, putative (fragment)                             | 1,013 | 0,004336   |
| TcCLB.507059.10  | mucin-like glycoprotein, putative                                | 1,013 | 0,01299    |
| TcCLB.504155.70  | mucin TcMUCII, putative                                          | 1,013 | 0,1662     |
| TcCLB.506779.20  | hypothetical protein, conserved                                  | 1,012 | 3,741E-22  |
| TcCLB.506775.22  | hypothetical protein, conserved                                  | 1,012 | 1,383E-11  |

|                  |                                                            |       |            |
|------------------|------------------------------------------------------------|-------|------------|
| TcCLB.447483.10  | hypothetical protein, conserved                            | 1,012 | 3,243E-11  |
| TcCLB.507721.20  | clathrin assembly protein (pseudogene), putative           | 1,011 | 4,434E-27  |
| TcCLB.506959.40  | enoyl-CoA hydratase/isomerase family protein, putative     | 1,011 | 1,841E-16  |
| TcCLB.506177.30  | hypothetical protein, conserved                            | 1,011 | 5,293E-12  |
| TcCLB.408437.20  | hypothetical protein, conserved                            | 1,011 | 4,943E-08  |
| TcCLB.511319.30  | hypothetical protein                                       | 1,011 | 1,253E-07  |
| TcCLB.503865.70  | hypothetical protein, conserved                            | 1,01  | 1,184E-20  |
| TcCLB.508973.30  | NUDIX family hydrolase, putative                           | 1,01  | 1,082E-10  |
| TcCLB.509037.20  | surface protease GP63, putative                            | 1,01  | 0,001954   |
| TcCLB.506855.220 | surface protease GP63, putative                            | 1,01  | 0,005035   |
| TcCLB.510655.100 | hypothetical protein                                       | 1,008 | 1,991E-12  |
| TcCLB.506537.10  | retrotransposon hot spot protein (RHS, pseudogene), putat  | 1,007 | 1,031E-12  |
| TcCLB.506113.10  | retrotransposon hot spot protein (RHS, pseudogene), putat  | 1,007 | 8,99E-12   |
| TcCLB.506285.120 | mucin TcMUCII, putative                                    | 1,007 | 0,03566    |
| TcCLB.511825.220 | alanyl-tRNA synthetase, putative                           | 1,006 | 4,471E-41  |
| TcCLB.510155.140 | Meckel syndrome type 6 protein, putative (mks6)            | 1,006 | 1,063E-32  |
| TcCLB.506945.110 | casein kinase 1 isoform 2, putative                        | 1,006 | 7,547E-20  |
| TcCLB.506793.10  | hypothetical protein, conserved (pseudogene)               | 1,005 | 1,274E-10  |
| TcCLB.507517.104 | hypothetical protein, conserved                            | 1,005 | 6,253E-07  |
| TcCLB.511569.30  | trans-sialidase (pseudogene), putative                     | 1,005 | 0,0009643  |
| TcCLB.508221.210 | mucin-associated surface protein (MASP), putative          | 1,005 | 0,1361     |
| TcCLB.510303.220 | hypothetical protein, conserved                            | 1,004 | 6,946E-23  |
| TcCLB.508153.520 | hypothetical protein, conserved (pseudogene)               | 1,004 | 3,493E-20  |
| TcCLB.403985.10  | retrotransposon hot spot (RHS) protein, putative, (fragmer | 1,004 | 2,916E-11  |
| TcCLB.511117.50  | surface protease GP63, putative                            | 1,004 | 0,003046   |
| TcCLB.503741.10  | mucin TcMUCII, putative                                    | 1,004 | 0,02917    |
| TcCLB.506053.10  | amino acid transporter, putative                           | 1,003 | 8,202E-42  |
| TcCLB.510565.20  | fatty acid desaturase, putative                            | 1,003 | 1,183E-19  |
| TcCLB.509935.29  | proline racemase (fragment)                                | 1,003 | 3,141E-10  |
| TcCLB.506163.30  | hypothetical protein, conserved                            | 1,003 | 1,28E-08   |
| TcCLB.507083.40  | hypothetical protein, conserved                            | 1,003 | 0,00001984 |
| TcCLB.510131.30  | hypothetical protein, conserved                            | 1,002 | 2,939E-19  |
| TcCLB.508317.50  | ammonium transporter, putative                             | 1,002 | 1,134E-18  |
| TcCLB.506289.40  | hypothetical protein, conserved                            | 1,002 | 8,321E-11  |
| TcCLB.504151.80  | Na/H antiporter-like protein, putative                     | 1,002 | 9,322E-10  |
| TcCLB.508413.5   | hypothetical protein, conserved                            | 1,002 | 0,0002889  |
| TcCLB.510479.30  | hypothetical protein                                       | 1,002 | 0,00121    |
| TcCLB.509493.60  | hypothetical protein                                       | 1,002 | 0,002063   |
| TcCLB.509513.10  | trans-sialidase, Group II, putative                        | 1,002 | 0,002861   |
| TcCLB.506597.9   | trans-sialidase, putative (fragment)                       | 1,002 | 0,5585     |
| TcCLB.511245.24  | hypothetical protein, conserved                            | 1,001 | 2,416E-22  |
| TcCLB.506201.70  | serine/threonine-protein phosphatase PP1 alpha             | 1,001 | 0,0001411  |
| TcCLB.509699.220 | trans-sialidase (pseudogene), putative                     | 1,001 | 0,001155   |
| TcCLB.445281.9   | calpain-like cysteine peptidase, putative                  | 1,001 | 0,004896   |
| TcCLB.410275.9   | mucin-associated surface protein (MASP), putative          | 1,001 | 0,4769     |



|                  |                                                           |        |            |
|------------------|-----------------------------------------------------------|--------|------------|
| TcCLB.509695.210 | serine carboxypeptidase (CBP1), putative                  | 0,9998 | 4,379E-20  |
| TcCLB.508989.100 | hypothetical protein, conserved                           | 0,9998 | 1,371E-12  |
| TcCLB.511173.483 | mucin TcMUCII (pseudogene), putative                      | 0,9998 | 0,04067    |
| TcCLB.509033.30  | cyclophilin, putative                                     | 0,9994 | 4,498E-08  |
| TcCLB.507873.60  | 1,2-Dihydroxy-3-keto-5-methylthiopentene dioxygenase, pu  | 0,9988 | 0,00000016 |
| TcCLB.509601.160 | hypothetical protein, conserved                           | 0,9987 | 0,00001351 |
| TcCLB.509149.30  | hypothetical protein, conserved                           | 0,9986 | 1,623E-26  |
| TcCLB.507851.50  | hypothetical protein, conserved                           | 0,9985 | 6,02E-20   |
| TcCLB.510889.221 | glucose-6-phosphate isomerase, glycosomal, putative       | 0,9983 | 4,5E-20    |
| TcCLB.510433.10  | hypothetical protein                                      | 0,9978 | 2,138E-17  |
| TcCLB.508859.118 | trans-sialidase, putative                                 | 0,9977 | 3,797E-06  |
| TcCLB.511573.20  | hypothetical protein                                      | 0,9973 | 9,534E-29  |
| TcCLB.511321.23  | cytidine deaminase-like protein                           | 0,9968 | 1,729E-09  |
| TcCLB.511171.40  | trans-sialidase (pseudogene), putative                    | 0,9964 | 0,000113   |
| TcCLB.506615.111 | elongation factor 1-gamma (EF-1-gamma, pseudogene), p     | 0,9961 | 0,00008605 |
| TcCLB.509259.126 | hypothetical protein                                      | 0,9956 | 0,0003585  |
| TcCLB.511823.30  | hypothetical protein, conserved                           | 0,9954 | 6,964E-16  |
| TcCLB.510347.20  | hypothetical protein, conserved                           | 0,9953 | 3,918E-17  |
| TcCLB.510625.54  | mucin-associated surface protein (MASP), putative         | 0,9953 | 0,1206     |
| TcCLB.510307.60  | retrotransposon hot spot protein (RHS, pseudogene), putat | 0,9952 | 1,104E-23  |
| TcCLB.506285.30  | trans-sialidase (pseudogene), putative                    | 0,9952 | 0,0008558  |
| TcCLB.508811.30  | hypothetical protein, conserved                           | 0,9948 | 9,027E-21  |
| TcCLB.505647.20  | hypothetical protein, conserved                           | 0,9945 | 3,008E-27  |
| TcCLB.507427.30  | retrotransposon hot spot protein (RHS, pseudogene), putat | 0,9945 | 5,67E-07   |
| TcCLB.503599.60  | hypothetical protein, conserved                           | 0,9937 | 1,62E-09   |
| TcCLB.506345.40  | trans-sialidase, Group II, putative                       | 0,9936 | 5,082E-09  |
| TcCLB.510465.125 | trans-sialidase (pseudogene), putative                    | 0,9934 | 0,3826     |
| TcCLB.509217.70  | hypothetical protein, conserved (pseudogene)              | 0,9931 | 0,00001003 |
| TcCLB.504787.20  | mucin TcMUCII, putative                                   | 0,9931 | 0,01541    |
| TcCLB.506279.74  | mucin-associated surface protein (MASP, pseudogene), pu   | 0,9925 | 0,05326    |
| TcCLB.508567.20  | hypothetical protein, conserved                           | 0,9922 | 6,293E-09  |
| TcCLB.509755.89  | hypothetical protein                                      | 0,9921 | 0,02427    |
| TcCLB.510055.50  | hypothetical protein, conserved                           | 0,9918 | 2,7E-22    |
| TcCLB.511279.40  | hypothetical protein, conserved                           | 0,9918 | 5,036E-06  |
| TcCLB.510301.70  | hypothetical protein, conserved                           | 0,9917 | 3,471E-15  |
| TcCLB.427247.4   | hypothetical protein, conserved (fragment)                | 0,9916 | 3,059E-09  |
| TcCLB.504155.20  | trans-sialidase, Group V, putative                        | 0,9912 | 0,003908   |
| TcCLB.471799.10  | trans-sialidase, putative (fragment)                      | 0,9912 | 0,01976    |
| TcCLB.511173.420 | mucin TcMUCII, putative                                   | 0,991  | 0,08185    |
| TcCLB.508221.170 | mucin-associated surface protein (MASP), putative         | 0,991  | 0,2936     |
| TcCLB.507017.40  | 2-hydroxy-3-oxopropionate reductase, putative             | 0,9909 | 1,436E-21  |
| TcCLB.506871.70  | hypothetical protein, conserved                           | 0,9902 | 1,789E-14  |
| TcCLB.509179.150 | otubain cysteine peptidase, Clan CA, family C65, putative | 0,99   | 7,219E-15  |
| TcCLB.510575.5   | proton motive ATPase, putative                            | 0,9896 | 5,012E-15  |
| TcCLB.509631.30  | mucin TcMUCII (pseudogene), putative                      | 0,9896 | 0,05797    |

|                  |                                                             |        |           |
|------------------|-------------------------------------------------------------|--------|-----------|
| TcCLB.509007.99  | P-glycoprotein (pseudogene) (tcpgp1)                        | 0,9894 | 9,079E-21 |
| TcCLB.509975.41  | mucin TcMUC, putative                                       | 0,9894 | 0,009195  |
| TcCLB.508119.190 | hypothetical protein, conserved                             | 0,989  | 1,47E-23  |
| TcCLB.507883.40  | hypothetical protein, conserved                             | 0,989  | 2,831E-08 |
| TcCLB.508873.150 | mucin TcMUCII, putative                                     | 0,9885 | 0,1337    |
| TcCLB.511255.169 | mucin-associated surface protein (MASP), putative           | 0,9884 | 0,1144    |
| TcCLB.508905.30  | hypothetical protein, conserved (pseudogene)                | 0,9883 | 3,912E-10 |
| TcCLB.511511.150 | sphingosine 1-phosphate lyase, putative (SPL)               | 0,9879 | 5,852E-14 |
| TcCLB.507031.140 | hypothetical protein, conserved (pseudogene)                | 0,9879 | 6,921E-11 |
| TcCLB.506801.80  | cysteine peptidase inhibitor (CHA)                          | 0,9878 | 1,515E-14 |
| TcCLB.509599.150 | serine/threonine protein kinase, putative                   | 0,9874 | 1,515E-08 |
| TcCLB.510643.100 | trans-sialidase (pseudogene), putative                      | 0,9873 | 0,3995    |
| TcCLB.507167.20  | retrotransposon hot spot (RHS) protein, putative            | 0,9865 | 1,586E-37 |
| TcCLB.506409.170 | trans-sialidase, Group VI, putative                         | 0,9863 | 4,489E-08 |
| TcCLB.506829.110 | fatty acyl CoA synthetase 2, putative                       | 0,9862 | 2,706E-18 |
| TcCLB.510285.80  | hypothetical protein, conserved                             | 0,986  | 3,191E-10 |
| TcCLB.503559.109 | electron-transfer-flavoprotein, alpha polypeptide, putative | 0,9859 | 5,228E-19 |
| TcCLB.507955.20  | mucin-associated surface protein (MASP), putative           | 0,9858 | 0,2       |
| TcCLB.506781.10  | mucin TcMUCII, putative                                     | 0,9851 | 0,1124    |
| TcCLB.510679.70  | lipase, putative                                            | 0,9845 | 0,006506  |
| TcCLB.506559.190 | dual specificity protein phosphatase, putative              | 0,9842 | 3,12E-17  |
| TcCLB.511443.10  | calpain-like cysteine peptidase (pseudogene), putative      | 0,9839 | 7,707E-06 |
| TcCLB.510663.70  | 6-phosphogluconate dehydrogenase, decarboxylating, puta     | 0,9837 | 2,573E-13 |
| TcCLB.504333.20  | trans-sialidase (pseudogene), putative                      | 0,9835 | 9,258E-13 |
| TcCLB.511613.90  | mucin-associated surface protein (MASP), putative           | 0,9834 | 0,007711  |
| TcCLB.509631.90  | mucin TcMUCII, putative                                     | 0,9834 | 0,04159   |
| TcCLB.506083.20  | trans-sialidase (pseudogene), putative                      | 0,9832 | 1,617E-09 |
| TcCLB.511859.80  | hypothetical protein                                        | 0,9831 | 2,583E-13 |
| TcCLB.503437.10  | retrotransposon hot spot protein (RHS, pseudogene), putat   | 0,983  | 1,269E-07 |
| TcCLB.506173.240 | mucin TcMUCII, putative                                     | 0,9829 | 0,03846   |
| TcCLB.508163.10  | mucin-associated surface protein (MASP, pseudogene), pu     | 0,9829 | 0,3191    |
| TcCLB.510759.114 | hypothetical protein, conserved                             | 0,9826 | 2,577E-09 |
| TcCLB.506951.50  | mucin TcMUCII (pseudogene), putative                        | 0,9825 | 4,868E-06 |
| TcCLB.506715.10  | protein kinase, putative                                    | 0,9819 | 3,257E-24 |
| TcCLB.504153.240 | hypothetical protein, conserved                             | 0,9816 | 1,312E-15 |
| TcCLB.507791.10  | retrotransposon hot spot (RHS) protein, putative (fragmen   | 0,9816 | 0,05992   |
| TcCLB.507773.60  | phosphoribosylpyrophosphate synthetase, putative            | 0,9812 | 2,448E-18 |
| TcCLB.511839.20  | mucin-associated surface protein (MASP), putative           | 0,9808 | 0,052     |
| TcCLB.509317.20  | esterase, putative                                          | 0,9807 | 4,483E-08 |
| TcCLB.506001.14  | mucin-associated surface protein (MASP), putative           | 0,9806 | 0,09031   |
| TcCLB.506247.390 | hypothetical protein, conserved                             | 0,9804 | 3,381E-16 |
| TcCLB.510787.10  | trans-sialidase, Group I, putative                          | 0,9804 | 7,896E-08 |
| TcCLB.503613.40  | pterin-4-alpha-carbinolamine dehydratase, putative          | 0,9803 | 1,968E-12 |
| TcCLB.435601.10  | trans-sialidase, putative (fragment)                        | 0,9802 | 0,02102   |
| TcCLB.511907.140 | hypothetical protein                                        | 0,9801 | 0,0002178 |

|                  |                                                            |        |            |
|------------------|------------------------------------------------------------|--------|------------|
| TcCLB.506355.140 | hypothetical protein, conserved                            | 0,9798 | 4,383E-19  |
| TcCLB.508121.30  | trans-sialidase (pseudogene), putative                     | 0,9793 | 2,795E-06  |
| TcCLB.508503.40  | hypothetical protein, conserved                            | 0,9791 | 2,596E-15  |
| TcCLB.506779.190 | Unconventional myosin                                      | 0,979  | 2,927E-17  |
| TcCLB.506967.70  | mucin-associated surface protein (MASP), putative          | 0,978  | 0,01404    |
| TcCLB.507491.20  | surface antigen TASV, putative                             | 0,9775 | 1,785E-22  |
| TcCLB.504769.60  | hypothetical protein, conserved                            | 0,9775 | 6,543E-07  |
| TcCLB.510979.30  | mucin TcMUCII (pseudogene), putative                       | 0,9775 | 0,001183   |
| TcCLB.508125.40  | hypothetical protein                                       | 0,9771 | 0,07853    |
| TcCLB.506113.60  | retrotransposon hot spot (RHS) protein, putative           | 0,9769 | 3,412E-37  |
| TcCLB.510557.40  | hypothetical protein                                       | 0,9766 | 0,0001778  |
| TcCLB.509857.60  | hypothetical protein, conserved                            | 0,9765 | 1,284E-27  |
| TcCLB.504797.144 | hypothetical protein, conserved                            | 0,9762 | 1,451E-15  |
| TcCLB.508817.119 | hypothetical protein, conserved                            | 0,9762 | 5,882E-08  |
| TcCLB.509167.150 | homoserine kinase, putative                                | 0,9754 | 1,837E-15  |
| TcCLB.507153.55  | hypothetical protein, conserved (pseudogene)               | 0,9754 | 0,00001567 |
| TcCLB.503975.60  | hypothetical protein                                       | 0,9751 | 1,44E-15   |
| TcCLB.508841.10  | surface antigen TASV-A4 (TASV-A4)                          | 0,9751 | 2,337E-06  |
| TcCLB.511585.170 | protein kinase, putative                                   | 0,9749 | 2,499E-17  |
| TcCLB.510359.340 | phospholipid:diacylglycerol acyltransferase, putative      | 0,9746 | 2,504E-21  |
| TcCLB.506247.410 | protein-l-isoaspartate o-methyltransferase, putative       | 0,9743 | 1,625E-13  |
| TcCLB.506769.50  | mucin TcMUCII, putative                                    | 0,9737 | 0,1406     |
| TcCLB.511837.120 | hypothetical protein, conserved                            | 0,9733 | 0,0002174  |
| TcCLB.509151.140 | 60S ribosomal protein L23a, putative                       | 0,973  | 5,121E-33  |
| TcCLB.504081.220 | retrotransposon hot spot protein (RHS, pseudogene), putat  | 0,9726 | 6,675E-13  |
| TcCLB.511653.69  | DNA repair protein, putative (fragment)                    | 0,972  | 3,45E-22   |
| TcCLB.503861.40  | trans-sialidase, Group VIII, putative                      | 0,972  | 2,753E-07  |
| TcCLB.503939.110 | hypothetical protein, conserved                            | 0,9719 | 1,597E-14  |
| TcCLB.506715.40  | hypothetical protein, conserved                            | 0,9714 | 2,143E-19  |
| TcCLB.511817.250 | hypothetical protein, conserved                            | 0,9712 | 1,797E-15  |
| TcCLB.511751.210 | phosphopantothenoylecysteine decarboxylase, putative (PPC) | 0,971  | 3,175E-15  |
| TcCLB.510049.10  | trans-sialidase, putative                                  | 0,9701 | 7,224E-07  |
| TcCLB.511903.180 | hypothetical protein, conserved                            | 0,97   | 6,44E-10   |
| TcCLB.508221.260 | 90 kDa surface protein, putative                           | 0,9698 | 0,1057     |
| TcCLB.511817.270 | hypothetical protein, conserved                            | 0,9694 | 1,652E-16  |
| TcCLB.506785.14  | mucin-associated surface protein (MASP), putative          | 0,9692 | 0,2037     |
| TcCLB.505943.110 | retrotransposon hot spot protein (RHS, pseudogene), putat  | 0,9686 | 2,973E-09  |
| TcCLB.509341.20  | hypothetical protein, conserved                            | 0,9684 | 5,738E-24  |
| TcCLB.506295.130 | prohibitin, putative                                       | 0,9681 | 1,657E-15  |
| TcCLB.510279.210 | mucin-associated surface protein (MASP), putative          | 0,968  | 0,09475    |
| TcCLB.510239.80  | trans-sialidase, Group V, putative                         | 0,9679 | 0,004352   |
| TcCLB.510623.10  | mucin TcMUCII, putative                                    | 0,9677 | 0,1171     |
| TcCLB.508319.20  | Present in the outer mitochondrial membrane proteome 1!    | 0,9673 | 1,428E-14  |
| TcCLB.507633.40  | mucin TcMUCII, putative                                    | 0,9671 | 0,0005516  |
| TcCLB.507043.21  | mucin TcMUCI, putative (fragment)                          | 0,9671 | 0,02223    |

|                  |                                                           |        |            |
|------------------|-----------------------------------------------------------|--------|------------|
| TcCLB.510023.30  | mucin-associated surface protein (MASP), putative (fragm  | 0,9668 | 0,07806    |
| TcCLB.511201.40  | hypothetical protein, conserved                           | 0,9666 | 1,334E-08  |
| TcCLB.507937.3   | trans-sialidase, putative                                 | 0,9666 | 0,4926     |
| TcCLB.506401.130 | hypothetical protein, conserved                           | 0,9664 | 3,61E-09   |
| TcCLB.509903.5   | retrotransposon hot spot (RHS) protein, putative (fragmen | 0,9658 | 8,343E-21  |
| TcCLB.508071.40  | hypothetical protein                                      | 0,9657 | 0,04287    |
| TcCLB.504123.30  | map kinase, putative                                      | 0,9656 | 1,642E-14  |
| TcCLB.503453.10  | hypothetical protein, conserved                           | 0,9656 | 6,326E-12  |
| TcCLB.454403.30  | retrotransposon hot spot protein (RHS, pseudogene), putat | 0,9656 | 1,115E-08  |
| TcCLB.511149.100 | mucin TcMUCII, putative                                   | 0,9652 | 0,00187    |
| TcCLB.506041.10  | hypothetical protein, conserved (fragment)                | 0,9649 | 3,598E-07  |
| TcCLB.506519.51  | hypothetical protein, conserved                           | 0,9647 | 6,743E-13  |
| TcCLB.511077.100 | mucin TcMUCII, putative                                   | 0,9643 | 0,2526     |
| TcCLB.508501.300 | hypothetical protein, conserved                           | 0,964  | 5,846E-12  |
| TcCLB.506409.190 | mucin-associated surface protein (MASP, pseudogene), pu   | 0,9639 | 0,005942   |
| TcCLB.511589.40  | hypothetical protein, conserved                           | 0,9632 | 7,738E-10  |
| TcCLB.504257.60  | S-adenosylmethionine decarboxylase proenzyme, putative    | 0,9632 | 7,662E-06  |
| TcCLB.509599.170 | hypothetical protein, conserved                           | 0,9629 | 1,529E-09  |
| TcCLB.510007.30  | RNA-binding protein, putative                             | 0,9627 | 2,857E-17  |
| TcCLB.508953.10  | hypothetical protein, conserved                           | 0,9627 | 4,142E-06  |
| TcCLB.509815.10  | retrotransposon hot spot (RHS) protein, putative          | 0,9626 | 8,955E-08  |
| TcCLB.509805.90  | hypothetical protein, conserved                           | 0,9624 | 2,901E-16  |
| TcCLB.506359.80  | Dynein light chain roadblock-type protein, putative       | 0,9624 | 6,012E-09  |
| TcCLB.510465.74  | mucin-associated surface protein (MASP), putative         | 0,9624 | 0,1758     |
| TcCLB.510371.130 | mucin TcMUCII, putative                                   | 0,9617 | 0,2056     |
| TcCLB.507491.162 | flagellar calcium-binding protein, putative (fragment)    | 0,9616 | 3,069E-18  |
| TcCLB.506443.150 | retrotransposon hot spot (RHS) protein, putative          | 0,9612 | 1,671E-39  |
| TcCLB.511809.10  | hypothetical protein                                      | 0,961  | 7,122E-12  |
| TcCLB.506661.170 | hypothetical protein, conserved                           | 0,961  | 5,104E-07  |
| TcCLB.511385.60  | hypothetical protein                                      | 0,961  | 8,906E-07  |
| TcCLB.510173.70  | MIX protein, putative                                     | 0,9609 | 7,234E-08  |
| TcCLB.508163.230 | mucin-associated surface protein (MASP), putative         | 0,9608 | 0,1535     |
| TcCLB.506471.100 | trans-sialidase, Group II, putative                       | 0,9605 | 0,00003161 |
| TcCLB.511173.180 | mucin-associated surface protein (MASP), putative         | 0,9604 | 0,08039    |
| TcCLB.510643.10  | dispersed gene family protein 1 (DGF-1), putative         | 0,9603 | 5,531E-07  |
| TcCLB.511771.80  | retrotransposon hot spot protein (RHS, pseudogene), putat | 0,9601 | 1,463E-09  |
| TcCLB.509589.20  | squalene monooxygenase, putative                          | 0,96   | 8,609E-22  |
| TcCLB.510555.30  | mucin TcMUCII, putative                                   | 0,9597 | 0,0704     |
| TcCLB.504081.340 | hypothetical protein (pseudogene)                         | 0,9597 | 0,2295     |
| TcCLB.511891.10  | trans-sialidase, Group II, putative                       | 0,9592 | 7,592E-08  |
| TcCLB.508387.160 | MORN repeat-containing protein                            | 0,9591 | 1,502E-11  |
| TcCLB.511817.300 | hypothetical protein, conserved                           | 0,9586 | 3,734E-12  |
| TcCLB.510901.180 | hypothetical protein, conserved                           | 0,9586 | 9,421E-09  |
| TcCLB.507485.40  | hypothetical protein, conserved                           | 0,9584 | 2,229E-16  |
| TcCLB.452283.4   | hypothetical protein, conserved                           | 0,9584 | 0,01354    |

|                  |                                                              |        |            |
|------------------|--------------------------------------------------------------|--------|------------|
| TcCLB.508205.4   | hypothetical protein, conserved                              | 0,9582 | 0,0003256  |
| TcCLB.511655.30  | hypothetical protein                                         | 0,9579 | 1,103E-22  |
| TcCLB.506501.240 | mucin-associated surface protein (MASP), putative            | 0,9577 | 0,2588     |
| TcCLB.509419.80  | mucin-associated surface protein (MASP), putative            | 0,9568 | 0,4026     |
| TcCLB.511815.90  | hypothetical protein                                         | 0,9559 | 6,712E-14  |
| TcCLB.509259.120 | retrotransposon hot spot (RHS) protein, putative             | 0,9553 | 1,577E-09  |
| TcCLB.509459.50  | hypothetical protein, conserved                              | 0,9552 | 2,456E-15  |
| TcCLB.509153.110 | hypothetical protein                                         | 0,9545 | 1,395E-15  |
| TcCLB.511605.80  | mucin-associated surface protein (MASP), putative            | 0,9543 | 0,2015     |
| TcCLB.506741.50  | mucin TcMUCII, putative                                      | 0,9538 | 0,001519   |
| TcCLB.509153.90  | dihydrofolate reductase-thymidylate synthase                 | 0,9537 | 4,509E-28  |
| TcCLB.504769.70  | hypothetical protein, conserved                              | 0,9536 | 1,005E-27  |
| TcCLB.506607.10  | hypothetical protein, conserved                              | 0,9535 | 4,929E-06  |
| TcCLB.506667.70  | mucin TcMUCII, putative                                      | 0,9532 | 0,05594    |
| TcCLB.505193.10  | serine/threonine protein phosphatase-like protein, putative  | 0,953  | 2,099E-09  |
| TcCLB.508501.200 | hypothetical protein, conserved                              | 0,953  | 0,001738   |
| TcCLB.511259.50  | trans-sialidase (pseudogene), putative                       | 0,9526 | 0,002969   |
| TcCLB.506281.20  | mucin TcMUCI, putative                                       | 0,9524 | 0,1446     |
| TcCLB.507529.20  | hypothetical protein, conserved                              | 0,9523 | 9,21E-23   |
| TcCLB.509217.150 | retrotransposon hot spot protein (RHS, pseudogene), putative | 0,9523 | 0,0001514  |
| TcCLB.508979.50  | trans-sialidase, Group VI, putative                          | 0,9522 | 0,003003   |
| TcCLB.509977.100 | hypothetical protein, conserved                              | 0,9517 | 2,111E-23  |
| TcCLB.508745.60  | mucin TcMUCII, putative                                      | 0,9517 | 0,03065    |
| TcCLB.509215.30  | hypothetical protein, conserved                              | 0,9516 | 6,824E-06  |
| TcCLB.479847.20  | retrotransposon hot spot (RHS) protein, putative             | 0,9511 | 0,008296   |
| TcCLB.509645.5   | hypothetical protein, conserved (pseudogene)                 | 0,951  | 9,393E-09  |
| TcCLB.508961.10  | hypothetical protein, conserved                              | 0,9508 | 1,735E-14  |
| TcCLB.509601.100 | hypothetical protein, conserved                              | 0,9507 | 1,732E-16  |
| TcCLB.511047.40  | NADH-cytochrome b5 reductase, putative                       | 0,9505 | 5,219E-21  |
| TcCLB.506599.224 | mucin TcMUCII, putative                                      | 0,9504 | 0,1569     |
| TcCLB.507007.108 | amino acid transporter, putative                             | 0,9501 | 8,179E-10  |
| TcCLB.508563.30  | retrotransposon hot spot protein (RHS, pseudogene), putative | 0,9501 | 0,1306     |
| TcCLB.511261.71  | hypothetical protein, conserved (pseudogene)                 | 0,9499 | 0,00000129 |
| TcCLB.509417.9   | trans-sialidase, putative                                    | 0,9496 | 0,0001509  |
| TcCLB.508387.90  | paraflagellar rod protein, putative                          | 0,9494 | 5,379E-17  |
| TcCLB.505207.30  | retrotransposon hot spot (RHS) protein, putative             | 0,9494 | 1,333E-13  |
| TcCLB.510611.79  | Present in the outer mitochondrial membrane proteome 3'      | 0,9494 | 6,256E-09  |
| TcCLB.511227.20  | retrotransposon hot spot protein (RHS, pseudogene), putative | 0,9493 | 1,427E-18  |
| TcCLB.507019.90  | hypothetical protein, conserved                              | 0,9493 | 0,00000153 |
| TcCLB.506683.100 | retrotransposon hot spot protein (RHS, pseudogene), putative | 0,9493 | 0,00007418 |
| TcCLB.503543.20  | divalent cation transporter, putative (fragment)             | 0,9488 | 3,12E-15   |
| TcCLB.504125.40  | ATPase subunit 9, putative                                   | 0,9483 | 1,214E-14  |
| TcCLB.510381.50  | hypothetical protein, conserved                              | 0,9475 | 6,151E-08  |
| TcCLB.506499.90  | 90 kDa surface protein, putative                             | 0,9475 | 0,2154     |
| TcCLB.452699.5   | trans-sialidase (pseudogene), putative                       | 0,9473 | 0,08877    |

|                  |                                                            |        |            |
|------------------|------------------------------------------------------------|--------|------------|
| TcCLB.510943.33  | fatty acyl CoA synthetase, putative                        | 0,9472 | 2,119E-14  |
| TcCLB.510083.10  | retrotransposon hot spot protein (RHS, pseudogene), putat  | 0,9472 | 4,999E-10  |
| TcCLB.510557.60  | mucin-associated surface protein (MASP), putative          | 0,9471 | 0,2581     |
| TcCLB.505647.50  | hypothetical protein, conserved                            | 0,946  | 0,00002944 |
| TcCLB.506673.30  | hypothetical protein, conserved                            | 0,9459 | 0,00000102 |
| TcCLB.506245.190 | trans-sialidase, Group V, putative                         | 0,9459 | 0,01691    |
| TcCLB.510935.20  | surface protease GP63, putative                            | 0,9458 | 0,001785   |
| TcCLB.503431.10  | caltractin, putative                                       | 0,9457 | 0,0003976  |
| TcCLB.503505.20  | MFS transporter, putative                                  | 0,9452 | 1,553E-10  |
| TcCLB.511825.60  | aquaporin, putative                                        | 0,9451 | 1,756E-13  |
| TcCLB.504637.21  | trans-sialidase (pseudogene), putative                     | 0,9451 | 0,00001449 |
| TcCLB.506813.120 | retrotransposon hot spot protein (RHS, pseudogene), putat  | 0,9449 | 0,0007692  |
| TcCLB.508759.60  | mucin-associated surface protein (MASP), putative          | 0,9445 | 0,2732     |
| TcCLB.506751.148 | mucin TcMUCII (pseudogene), putative                       | 0,9443 | 0,2114     |
| TcCLB.508241.104 | hypothetical protein, conserved                            | 0,9441 | 2,749E-20  |
| TcCLB.509869.30  | mucin TcMUCII, putative                                    | 0,9441 | 0,1878     |
| TcCLB.504003.70  | S-adenosyl-methyltransferase mraW-like protein, putative   | 0,944  | 3,954E-16  |
| TcCLB.503735.20  | hypothetical protein                                       | 0,944  | 1,438E-09  |
| TcCLB.508873.454 | mucin TcMUC (pseudogene), putative                         | 0,944  | 0,1672     |
| TcCLB.510155.70  | heat shock protein 70 (hsp70), putative                    | 0,9435 | 2,403E-23  |
| TcCLB.510543.60  | retrotransposon hot spot protein (RHS, pseudogene), putat  | 0,9434 | 6,37E-10   |
| TcCLB.508177.81  | surface protease GP63 (pseudogene), putative               | 0,9433 | 0,00002859 |
| TcCLB.511577.180 | retrotransposon hot spot (RHS) protein, putative           | 0,9431 | 1,418E-10  |
| TcCLB.511907.130 | mucin-like glycoprotein, putative                          | 0,9431 | 0,000242   |
| TcCLB.506183.80  | hypothetical protein                                       | 0,9429 | 0,0769     |
| TcCLB.510095.50  | dispersed gene family protein 1 (DGF-1), putative          | 0,9428 | 0,00001126 |
| TcCLB.506295.110 | hypothetical protein, conserved                            | 0,9426 | 0,00000996 |
| TcCLB.507085.170 | mucin TcMUCII, putative                                    | 0,9425 | 0,008247   |
| TcCLB.511737.6   | hypothetical protein, conserved                            | 0,9421 | 0,00002612 |
| TcCLB.504689.10  | hypothetical protein                                       | 0,9419 | 0,06484    |
| TcCLB.505779.20  | trans-sialidase, Group II, putative                        | 0,9414 | 2,721E-06  |
| TcCLB.510101.400 | hypothetical protein, conserved                            | 0,941  | 4,036E-20  |
| TcCLB.507275.61  | surface antigen TASV-A1 (TASV-A1)                          | 0,9405 | 0,0002094  |
| TcCLB.506131.84  | mucin-associated surface protein (MASP), putative          | 0,9403 | 0,0612     |
| TcCLB.506777.90  | hypothetical protein, conserved                            | 0,9398 | 4,016E-13  |
| TcCLB.506909.160 | trans-sialidase, Group V, putative                         | 0,9397 | 0,0006286  |
| TcCLB.508529.10  | retrotransposon hot spot (RHS) protein, putative, (fragmer | 0,9395 | 1,405E-07  |
| TcCLB.506825.230 | hypothetical protein, conserved                            | 0,9394 | 3,805E-26  |
| TcCLB.506441.20  | hypothetical protein, conserved                            | 0,9394 | 1,747E-22  |
| TcCLB.503723.50  | hypothetical protein, conserved                            | 0,9393 | 2,98E-18   |
| TcCLB.507507.10  | hypothetical protein, conserved                            | 0,9392 | 6,257E-12  |
| TcCLB.511593.30  | mucin-associated surface protein (MASP), putative          | 0,9391 | 0,006758   |
| TcCLB.511759.30  | hypothetical protein, conserved                            | 0,9388 | 5,666E-14  |
| TcCLB.503661.20  | retrotransposon hot spot (RHS) protein, putative           | 0,9388 | 0,0302     |
| TcCLB.506927.20  | hypothetical protein, conserved                            | 0,9387 | 8,348E-11  |

|                  |                                                                  |        |           |
|------------------|------------------------------------------------------------------|--------|-----------|
| TcCLB.506825.20  | hypothetical protein, conserved                                  | 0,9365 | 3,168E-23 |
| TcCLB.506401.90  | centrin, putative                                                | 0,9363 | 1,39E-11  |
| TcCLB.511441.20  | calpain-like cysteine peptidase, putative (fragment)             | 0,9363 | 0,1282    |
| TcCLB.508205.48  | hypothetical protein, conserved                                  | 0,9359 | 0,001177  |
| TcCLB.506327.80  | serine/threonine protein kinase, putative                        | 0,9358 | 1,182E-10 |
| TcCLB.510881.9   | trans-sialidase, putative                                        | 0,9354 | 0,09719   |
| TcCLB.503433.30  | hypothetical protein, conserved                                  | 0,9345 | 1,126E-12 |
| TcCLB.511603.60  | mucin TcMUCII, putative                                          | 0,9344 | 0,01511   |
| TcCLB.506763.140 | hypothetical protein                                             | 0,9342 | 0,2901    |
| TcCLB.418185.40  | hypothetical protein, conserved (pseudogene)                     | 0,934  | 9,29E-09  |
| TcCLB.509331.60  | hypothetical protein, conserved                                  | 0,934  | 1,724E-07 |
| TcCLB.503723.60  | tartrate-resistant acid phosphatase type 5 precursor, putative   | 0,9335 | 1,28E-09  |
| TcCLB.509779.4   | hypothetical protein, conserved                                  | 0,9335 | 1,801E-07 |
| TcCLB.511607.40  | mucin-associated surface protein (MASP), putative                | 0,9333 | 0,006832  |
| TcCLB.508521.81  | elongation factor 1-gamma (EF-1-gamma), putative                 | 0,9333 | 0,03124   |
| TcCLB.508973.60  | hypothetical protein, conserved                                  | 0,933  | 6,12E-14  |
| TcCLB.506791.79  | hypothetical protein, conserved                                  | 0,933  | 8,846E-07 |
| TcCLB.510915.5   | dispersed gene family protein 1 (DGF-1), putative                | 0,9329 | 0,01256   |
| TcCLB.511077.20  | beta galactofuranosyl glycosyltransferase (pseudogene), putative | 0,9329 | 0,04938   |
| TcCLB.510719.90  | hypothetical protein, conserved                                  | 0,9328 | 2,139E-08 |
| TcCLB.506763.4   | surface protease GP63 (pseudogene), putative                     | 0,9328 | 0,005071  |
| TcCLB.510087.80  | hypothetical protein, conserved                                  | 0,9323 | 4,881E-16 |
| TcCLB.510347.40  | hypothetical protein, conserved                                  | 0,9322 | 9,642E-18 |
| TcCLB.509207.40  | hypothetical protein, conserved                                  | 0,9318 | 1,357E-35 |
| TcCLB.510155.90  | hypothetical protein, conserved                                  | 0,9318 | 2,788E-28 |
| TcCLB.508961.4   | ADP-ribosylation factor, putative                                | 0,9315 | 2,243E-06 |
| TcCLB.508429.20  | mucin-like glycoprotein, putative                                | 0,9315 | 0,1206    |
| TcCLB.477935.9   | calpain-like cysteine peptidase (pseudogene), putative           | 0,9314 | 6,542E-06 |
| TcCLB.511921.29  | mucin-associated surface protein (MASP, pseudogene), putative    | 0,9311 | 0,1379    |
| TcCLB.508435.20  | mucin TcMUCII, putative                                          | 0,9309 | 0,1365    |
| TcCLB.508899.54  | hypothetical protein, conserved                                  | 0,9307 | 2,804E-13 |
| TcCLB.504249.65  | mucin TcMUCII, putative                                          | 0,9307 | 0,03401   |
| TcCLB.506763.90  | mucin-associated surface protein (MASP, pseudogene), putative    | 0,9302 | 0,2697    |
| TcCLB.505647.30  | hypothetical protein, conserved                                  | 0,9295 | 3,309E-13 |
| TcCLB.507645.30  | hypothetical protein, conserved                                  | 0,929  | 6,507E-10 |
| TcCLB.510095.80  | hypothetical protein                                             | 0,929  | 0,0313    |
| TcCLB.511003.60  | 3-ketoacyl-CoA thiolase, putative (ACAT)                         | 0,9283 | 5,218E-14 |
| TcCLB.511411.16  | hypothetical protein, conserved                                  | 0,9279 | 2,175E-15 |
| TcCLB.508461.240 | chaperone protein DNAJ, putative                                 | 0,9279 | 2,028E-11 |
| TcCLB.508641.110 | hypothetical protein, conserved                                  | 0,9279 | 1,746E-06 |
| TcCLB.506683.210 | retrotransposon hot spot protein (RHS, pseudogene), putative     | 0,9278 | 3,529E-06 |
| TcCLB.511825.190 | hypothetical protein, conserved                                  | 0,9276 | 5,815E-19 |
| TcCLB.511153.19  | surface protease GP63, putative                                  | 0,9268 | 2,42E-12  |
| TcCLB.506941.150 | sphingosine 1-phosphate lyase, putative (SPL)                    | 0,9265 | 8,934E-11 |
| TcCLB.509683.10  | hypothetical protein                                             | 0,9263 | 1,483E-31 |

|                  |                                                           |        |            |
|------------------|-----------------------------------------------------------|--------|------------|
| TcCLB.511431.90  | conserved protein, unknown function                       | 0,9263 | 0,0178     |
| TcCLB.413293.9   | trans-sialidase, putative (fragment)                      | 0,9263 | 0,03387    |
| TcCLB.511911.130 | phosphoglucomutase                                        | 0,9259 | 9,986E-13  |
| TcCLB.510025.150 | mucin TcMUCII, putative                                   | 0,9259 | 0,1278     |
| TcCLB.503579.70  | ATPase subunit 9, putative                                | 0,9256 | 3,859E-13  |
| TcCLB.510187.530 | hypothetical protein, conserved                           | 0,9255 | 1,489E-16  |
| TcCLB.507491.151 | flagellar calcium-binding protein, putative               | 0,925  | 4,997E-18  |
| TcCLB.506067.280 | mucin TcMUCII, putative                                   | 0,925  | 0,01379    |
| TcCLB.503657.70  | tyrosine phosphatase, putative                            | 0,9248 | 1,044E-09  |
| TcCLB.506593.30  | ribosomal protein S7, putative                            | 0,9246 | 3,412E-37  |
| TcCLB.507485.20  | hypothetical protein, conserved                           | 0,9235 | 3,193E-08  |
| TcCLB.510155.220 | trans-sialidase (pseudogene), putative                    | 0,9234 | 4,765E-06  |
| TcCLB.507615.40  | hypothetical protein, conserved                           | 0,9229 | 3,398E-22  |
| TcCLB.509287.130 | surface protease GP63 (pseudogene), putative              | 0,9229 | 4,186E-06  |
| TcCLB.511259.230 | trans-sialidase (pseudogene), putative                    | 0,9228 | 0,01611    |
| TcCLB.506337.80  | surface antigen TASV, putative                            | 0,9225 | 5,211E-17  |
| TcCLB.510155.94  | hypothetical protein, conserved                           | 0,9222 | 5,662E-11  |
| TcCLB.507747.114 | mucin-associated surface protein (MASP, pseudogene), pu   | 0,9222 | 0,08552    |
| TcCLB.506475.90  | hypothetical protein, conserved                           | 0,9221 | 4,647E-13  |
| TcCLB.507747.195 | glyceraldehyde-3-phosphate dehydrogenase (pseudogene),    | 0,9217 | 0,003228   |
| TcCLB.507145.60  | trans-sialidase, Group V, putative                        | 0,9214 | 0,007394   |
| TcCLB.509065.36  | hypothetical protein, conserved                           | 0,9213 | 2,319E-06  |
| TcCLB.503975.20  | hypothetical protein                                      | 0,9211 | 9,752E-07  |
| TcCLB.510353.30  | paraflagellar rod component par4, putative                | 0,921  | 1,787E-20  |
| TcCLB.506825.170 | lanosterol synthase, putative                             | 0,9205 | 3,135E-20  |
| TcCLB.505997.80  | trans-sialidase, Group VIII, putative                     | 0,9201 | 0,01662    |
| TcCLB.509461.80  | hypothetical protein, conserved                           | 0,919  | 1,017E-11  |
| TcCLB.508317.120 | mannosyl-oligosaccharide 1,2-alpha-mannosidase IB, puta   | 0,9189 | 2,462E-14  |
| TcCLB.511571.40  | hypothetical protein, conserved                           | 0,9187 | 1,346E-15  |
| TcCLB.511647.20  | hypothetical protein, conserved                           | 0,9187 | 1,638E-06  |
| TcCLB.510643.50  | retrotransposon hot spot protein (RHS, pseudogene), putat | 0,9177 | 2,47E-10   |
| TcCLB.511643.130 | mucin-associated surface protein (MASP, pseudogene), pu   | 0,9176 | 0,0001621  |
| TcCLB.509427.10  | trans-sialidase, Group II, putative                       | 0,9173 | 0,02504    |
| TcCLB.506759.40  | mucin-associated surface protein (MASP), putative         | 0,9171 | 0,02235    |
| TcCLB.509525.250 | mucin TcMUCII, putative                                   | 0,9171 | 0,2327     |
| TcCLB.511517.120 | hypothetical protein, conserved                           | 0,917  | 1,731E-18  |
| TcCLB.511233.59  | hypothetical protein, conserved                           | 0,9168 | 6,629E-11  |
| TcCLB.511817.50  | hypothetical protein, conserved                           | 0,9166 | 4,356E-14  |
| TcCLB.508241.80  | hypothetical protein, conserved                           | 0,9163 | 3,072E-08  |
| TcCLB.508857.160 | threonine synthase, putative                              | 0,9159 | 1,901E-14  |
| TcCLB.511807.64  | DNA repair protein, putative                              | 0,9155 | 2,937E-12  |
| TcCLB.507653.20  | trans-sialidase, Group II, putative                       | 0,9155 | 0,001024   |
| TcCLB.510377.250 | mucin TcMUCII (pseudogene), putative                      | 0,9154 | 0,1678     |
| TcCLB.511507.70  | calpain-like cysteine peptidase, putative                 | 0,9153 | 5,736E-10  |
| TcCLB.506837.10  | mucin TcMUCI, putative                                    | 0,9153 | 0,00002292 |



|                  |                                                              |        |            |
|------------------|--------------------------------------------------------------|--------|------------|
| TcCLB.508045.20  | hypothetical protein, conserved                              | 0,9152 | 2,741E-10  |
| TcCLB.508871.10  | trans-sialidase, Group V, putative                           | 0,9146 | 0,00906    |
| TcCLB.506153.20  | amino acid transporter, putative                             | 0,9145 | 1,062E-24  |
| TcCLB.511333.4   | Calpain-like protein 1 (CAP5.5)                              | 0,9144 | 1,047E-11  |
| TcCLB.508435.30  | mucin-associated surface protein (MASP, pseudogene), pu      | 0,914  | 0,1334     |
| TcCLB.511851.50  | mucin TcMUCI, putative                                       | 0,9134 | 0,05569    |
| TcCLB.510377.430 | mucin-associated surface protein (MASP), putative            | 0,9133 | 0,05643    |
| TcCLB.510823.30  | Isoprenylcysteine alpha-carbonyl methylesterase, putative    | 0,9127 | 2,799E-17  |
| TcCLB.507645.40  | hypothetical protein, conserved                              | 0,9126 | 4,618E-18  |
| TcCLB.505065.30  | carnitine O-palmitoyltransferase (pseudogene), putative      | 0,9126 | 0,07443    |
| TcCLB.510503.20  | mucin TcMUCII, putative                                      | 0,9123 | 0,04354    |
| TcCLB.509119.30  | hypothetical protein, conserved                              | 0,9122 | 3,409E-12  |
| TcCLB.509109.130 | protein tyrosine phosphatase-like protein, putative          | 0,9122 | 3,175E-08  |
| TcCLB.506853.40  | hypothetical protein, conserved                              | 0,9121 | 2,562E-08  |
| TcCLB.507953.210 | hypothetical protein                                         | 0,9121 | 0,1152     |
| TcCLB.511445.10  | calpain-like cysteine peptidase, putative                    | 0,9116 | 0,0003075  |
| TcCLB.509975.15  | surface protease GP63 (pseudogene), putative                 | 0,9113 | 0,09413    |
| TcCLB.506195.10  | glucose-6-phosphate dehydrogenase (pseudogene), putative     | 0,9109 | 0,00002014 |
| TcCLB.506289.160 | hypothetical protein                                         | 0,9107 | 0,003796   |
| TcCLB.509737.19  | retrotransposon hot spot protein (RHS, pseudogene), putative | 0,9106 | 0,005512   |
| TcCLB.508175.100 | hypothetical protein                                         | 0,9104 | 6,237E-20  |
| TcCLB.508787.14  | hypothetical protein, conserved                              | 0,9104 | 0,0004156  |
| TcCLB.507699.149 | mucin TcMUCII, putative                                      | 0,9104 | 0,08584    |
| TcCLB.511047.20  | mucin-like glycoprotein, putative                            | 0,9098 | 6,12E-14   |
| TcCLB.508567.60  | hypothetical protein                                         | 0,9097 | 5,839E-15  |
| TcCLB.510101.150 | adaptin-related protein-like, putative                       | 0,9096 | 1,354E-18  |
| TcCLB.507691.20  | dispersed gene family protein 1 (DGF-1), putative            | 0,9092 | 1,903E-12  |
| TcCLB.506529.595 | hypothetical protein                                         | 0,9091 | 2,123E-10  |
| TcCLB.510351.90  | dihydrolipoamide branched chain transacylase, putative       | 0,9089 | 1,615E-16  |
| TcCLB.511587.30  | retrotransposon hot spot protein (RHS, pseudogene), putative | 0,9087 | 2,082E-24  |
| TcCLB.510889.290 | hypothetical protein                                         | 0,9087 | 0,0002671  |
| TcCLB.507543.30  | retrotransposon hot spot protein (RHS, pseudogene), putative | 0,9081 | 1,444E-20  |
| TcCLB.506885.416 | regulator of chromosome condensation (RCC1), putative        | 0,9081 | 3,118E-11  |
| TcCLB.508149.70  | mucin TcMUCII, putative                                      | 0,9079 | 0,1023     |
| TcCLB.510545.40  | mucin TcMUCII, putative                                      | 0,9076 | 0,039      |
| TcCLB.506337.90  | surface antigen TASV, putative (TASV)                        | 0,9074 | 7,067E-22  |
| TcCLB.508721.4   | hypothetical protein, conserved                              | 0,9074 | 0,0000204  |
| TcCLB.506499.120 | hypothetical protein                                         | 0,907  | 0,2226     |
| TcCLB.511245.130 | fatty acid elongase, putative                                | 0,9064 | 6,677E-21  |
| TcCLB.503505.10  | 60S acidic ribosomal protein P2, putative                    | 0,9064 | 2,674E-12  |
| TcCLB.511395.10  | hypothetical protein, conserved                              | 0,9061 | 2,337E-09  |
| TcCLB.505949.10  | mucin TcMUCII, putative                                      | 0,9059 | 0,06304    |
| TcCLB.508541.100 | surface protease GP63, putative                              | 0,9056 | 0,06715    |
| TcCLB.504081.110 | mucin TcMUCII (pseudogene), putative                         | 0,9052 | 0,1533     |
| TcCLB.509747.90  | hypothetical protein, conserved                              | 0,9049 | 3,37E-08   |

|                  |                                                            |        |            |
|------------------|------------------------------------------------------------|--------|------------|
| TcCLB.507645.70  | Meckel syndrome type 1 protein, putative (fragment) (mks   | 0,9047 | 1,976E-14  |
| TcCLB.427789.20  | Paraflagellar Rod Proteome Component 9, putative (PFC9)    | 0,9047 | 5,885E-08  |
| TcCLB.511127.330 | kinetoplastid kinetochore protein 19, putative (kkt19)     | 0,9047 | 0,0005923  |
| TcCLB.510483.200 | hypothetical protein                                       | 0,9047 | 0,1635     |
| TcCLB.506017.51  | retrotransposon hot spot (RHS) protein, putative (fragmen  | 0,9046 | 3,92E-26   |
| TcCLB.508221.560 | mucin TcMUCII, putative                                    | 0,9043 | 0,3027     |
| TcCLB.507781.10  | hypothetical protein, conserved (pseudogene)               | 0,9042 | 0,0001273  |
| TcCLB.511661.90  | ribose-phosphate pyrophosphokinase, putative               | 0,9037 | 1,043E-23  |
| TcCLB.510789.20  | mucin TcMUC (pseudogene), putative                         | 0,9035 | 0,0006265  |
| TcCLB.509429.160 | hypothetical protein                                       | 0,9034 | 5,068E-15  |
| TcCLB.504797.140 | CLC-type chloride channel, putative                        | 0,9033 | 2,859E-21  |
| TcCLB.508323.50  | hypothetical protein, conserved                            | 0,9032 | 1,405E-06  |
| TcCLB.508763.20  | mucin TcMUCII, putative                                    | 0,903  | 0,01618    |
| TcCLB.511621.9   | hypothetical protein, conserved                            | 0,9029 | 4,483E-08  |
| TcCLB.508117.10  | surface protease GP63 (pseudogene), putative               | 0,9027 | 0,0004729  |
| TcCLB.509155.30  | hypothetical protein, conserved                            | 0,9024 | 4,986E-17  |
| TcCLB.508465.110 | acyl-CoA dehydrogenase, putative                           | 0,9024 | 8,963E-13  |
| TcCLB.509149.60  | 60S ribosomal protein L19, putative                        | 0,9022 | 5,825E-11  |
| TcCLB.507665.10  | hypothetical protein, conserved                            | 0,9022 | 6,124E-07  |
| TcCLB.506001.120 | hypothetical protein, conserved (pseudogene)               | 0,9021 | 0,02531    |
| TcCLB.507167.150 | retrotransposon hot spot protein (RHS, pseudogene), putat  | 0,9019 | 1,194E-07  |
| TcCLB.510733.5   | hypothetical protein, conserved (fragment)                 | 0,9019 | 0,00004658 |
| TcCLB.506137.10  | surface protease GP63, putative                            | 0,9015 | 0,01143    |
| TcCLB.508851.130 | hypothetical protein                                       | 0,9012 | 7,664E-18  |
| TcCLB.505779.10  | trans-sialidase, Group II, putative                        | 0,9011 | 4,378E-06  |
| TcCLB.509539.67  | paraflagellar rod component par4, putative (fragment)      | 0,901  | 0,001586   |
| TcCLB.445777.10  | retrotransposon hot spot (RHS) protein, putative, (fragmer | 0,9004 | 6,89E-11   |
| TcCLB.506325.33  | ATP-dependent DEAD/H RNA helicase (pseudogene), putat      | 0,9004 | 0,04926    |
| TcCLB.509811.18  | mucin-associated surface protein (MASP, pseudogene), pu    | 0,9003 | 0,1052     |
| TcCLB.508027.129 | Hydroxymethylglutaryl-CoA lyase, mitochondrial, putative   | 0,9001 | 3,478E-06  |
| TcCLB.506779.150 | histone H2B variant, putative                              | 0,9    | 2,551E-16  |
| TcCLB.507357.100 | trans-sialidase, Group V, putative                         | 0,9    | 0,00002614 |
| TcCLB.506909.90  | mucin-associated surface protein (MASP, pseudogene), pu    | 0,8998 | 0,1628     |
| TcCLB.508859.74  | SNF2 DNA repair protein, putative                          | 0,8997 | 3,622E-23  |
| TcCLB.509815.70  | retrotransposon hot spot protein (RHS, pseudogene), putat  | 0,8993 | 6,344E-08  |
| TcCLB.506409.10  | hypothetical protein                                       | 0,8992 | 0,1035     |
| TcCLB.508479.80  | retrotransposon hot spot (RHS) protein, putative           | 0,8991 | 2,988E-08  |
| TcCLB.508503.60  | protein kinase, putative                                   | 0,8989 | 3,631E-28  |
| TcCLB.508239.40  | palmitoyl acyltransferase 8, putative                      | 0,8989 | 1,593E-06  |
| TcCLB.508509.51  | mucin-associated surface protein (MASP, pseudogene), pu    | 0,8985 | 0,1103     |
| TcCLB.508045.30  | hypothetical protein, conserved                            | 0,8984 | 3,718E-15  |
| TcCLB.503881.10  | kynureninase, putative                                     | 0,8984 | 4,471E-08  |
| TcCLB.510101.34  | hypothetical protein, conserved                            | 0,8982 | 1,555E-10  |
| TcCLB.504081.250 | 90 kDa surface protein, putative                           | 0,8982 | 0,02843    |
| TcCLB.509571.60  | hypothetical protein, conserved                            | 0,8979 | 1,192E-08  |

|                  |                                                               |        |            |
|------------------|---------------------------------------------------------------|--------|------------|
| TcCLB.507317.60  | protein kinase-like protein, putative                         | 0,8978 | 0,00001731 |
| TcCLB.507807.30  | hypothetical protein                                          | 0,8978 | 0,00153    |
| TcCLB.504741.140 | esterase, putative                                            | 0,8975 | 1,972E-07  |
| TcCLB.509153.30  | hypothetical protein, conserved                               | 0,8972 | 1,082E-25  |
| TcCLB.510755.89  | kinetoplastid membrane protein KMP-11, putative               | 0,8972 | 8,362E-17  |
| TcCLB.510847.70  | dispersed gene family protein 1 (DGF-1), putative             | 0,8969 | 0,00009482 |
| TcCLB.511017.25  | hypothetical protein                                          | 0,8967 | 0,001317   |
| TcCLB.509169.30  | hypothetical protein, conserved                               | 0,8966 | 3,798E-09  |
| TcCLB.508099.20  | serine-alanine-and proline-rich protein, putative             | 0,8965 | 0,01113    |
| TcCLB.510781.10  | dispersed gene family protein 1 (DGF-1, pseudogene), putative | 0,8961 | 5,495E-06  |
| TcCLB.511367.150 | hypothetical protein, conserved                               | 0,896  | 2,917E-11  |
| TcCLB.508677.90  | hypothetical protein, conserved                               | 0,8953 | 0,0001927  |
| TcCLB.510343.10  | hypothetical protein, conserved                               | 0,8947 | 0,00002431 |
| TcCLB.430895.4   | hypothetical protein, conserved                               | 0,8943 | 0,1382     |
| TcCLB.507699.10  | mucin TcMUCII, putative                                       | 0,8942 | 0,01752    |
| TcCLB.506613.9   | surface protease GP63, putative (fragment)                    | 0,8938 | 0,1004     |
| TcCLB.506969.6   | trans-sialidase (pseudogene), putative                        | 0,8936 | 0,4427     |
| TcCLB.507589.30  | Checkpoint protein HUS1, putative                             | 0,8935 | 1,994E-14  |
| TcCLB.510187.150 | guanylate kinase, putative                                    | 0,8935 | 6,354E-13  |
| TcCLB.511729.70  | cationic amino acid transporter, putative                     | 0,8931 | 0,0001737  |
| TcCLB.504655.30  | protein kinase, putative                                      | 0,8925 | 3,815E-16  |
| TcCLB.507063.290 | hypothetical protein                                          | 0,8924 | 3,224E-13  |
| TcCLB.509599.164 | engulfment and cell motility domain 2, putative               | 0,8923 | 7,335E-14  |
| TcCLB.507623.120 | hypothetical protein, conserved                               | 0,8921 | 1,365E-06  |
| TcCLB.507681.170 | hypothetical protein, conserved                               | 0,892  | 8,343E-09  |
| TcCLB.506683.190 | trans-sialidase, Group II, putative                           | 0,892  | 0,00005259 |
| TcCLB.506435.134 | Enriched in surface-labeled proteome protein 11, putative     | 0,8919 | 2,257E-08  |
| TcCLB.509887.19  | dispersed gene family protein 1 (DGF-1), putative             | 0,8915 | 0,00008872 |
| TcCLB.508247.130 | mucin-associated surface protein (MASP), putative             | 0,8914 | 0,1954     |
| TcCLB.507809.160 | hypothetical protein, conserved                               | 0,891  | 9,082E-11  |
| TcCLB.506339.81  | elongation factor 1-gamma (EF-1-gamma, pseudogene), putative  | 0,8903 | 0,03417    |
| TcCLB.508411.70  | hypothetical protein, conserved                               | 0,8901 | 1,535E-10  |
| TcCLB.509391.30  | flagellar calcium-binding protein, putative                   | 0,89   | 0,227      |
| TcCLB.510947.50  | cyclophilin, putative (CYP)                                   | 0,8899 | 1,42E-09   |
| TcCLB.508433.145 | mucin TcMUCII (pseudogene), putative                          | 0,8897 | 0,3109     |
| TcCLB.509767.150 | hypothetical protein, conserved                               | 0,8896 | 9,848E-12  |
| TcCLB.504173.40  | hypothetical protein                                          | 0,8894 | 3,267E-06  |
| TcCLB.507873.40  | hypothetical protein, conserved                               | 0,8893 | 0,00002022 |
| TcCLB.503827.87  | hypothetical protein, conserved (pseudogene)                  | 0,8892 | 0,1959     |
| TcCLB.510679.60  | lipase, putative                                              | 0,8889 | 0,00321    |
| TcCLB.506779.70  | hypothetical protein, conserved                               | 0,8888 | 2,131E-07  |
| TcCLB.511213.30  | surface protease GP63 (pseudogene), putative                  | 0,8886 | 0,0007345  |
| TcCLB.509777.110 | hypothetical protein, conserved                               | 0,8884 | 9,706E-06  |
| TcCLB.508777.50  | hypothetical protein                                          | 0,8882 | 4,986E-12  |
| TcCLB.508543.180 | hypothetical protein, conserved                               | 0,8881 | 1,36E-16   |

|                  |                                                           |        |            |
|------------------|-----------------------------------------------------------|--------|------------|
| TcCLB.511827.40  | hypothetical protein, conserved                           | 0,8879 | 4,221E-11  |
| TcCLB.511433.10  | hypothetical protein, conserved                           | 0,8879 | 7,521E-07  |
| TcCLB.509607.20  | hypothetical protein, conserved                           | 0,8875 | 0,07779    |
| TcCLB.508501.260 | hypothetical protein, conserved                           | 0,8869 | 5,227E-10  |
| TcCLB.510849.20  | trans-sialidase (pseudogene), putative                    | 0,8869 | 0,00001859 |
| TcCLB.506773.20  | hypothetical protein, conserved                           | 0,8865 | 3,924E-16  |
| TcCLB.511469.50  | hypothetical protein, conserved                           | 0,8859 | 7,439E-06  |
| TcCLB.506769.70  | mucin TcMUCII, putative                                   | 0,8858 | 0,1354     |
| TcCLB.509859.70  | hypothetical protein, conserved                           | 0,8857 | 6,586E-09  |
| TcCLB.504253.50  | hypothetical protein, conserved                           | 0,8853 | 3,541E-10  |
| TcCLB.508153.740 | hypothetical protein                                      | 0,8846 | 2,815E-15  |
| TcCLB.510759.54  | hypothetical protein                                      | 0,8845 | 0,0001998  |
| TcCLB.508061.20  | trans-sialidase, Group II, putative                       | 0,8843 | 0,0003101  |
| TcCLB.507849.10  | trans-sialidase (pseudogene), putative                    | 0,8842 | 0,2201     |
| TcCLB.510105.240 | short chain 3-hydroxyacyl-CoA dehydrogenase, putative     | 0,8839 | 8,173E-17  |
| TcCLB.511817.80  | protein kinase, putative                                  | 0,8835 | 2,628E-11  |
| TcCLB.505365.20  | retrotransposon hot spot protein (RHS, pseudogene), putat | 0,8833 | 1,593E-08  |
| TcCLB.508053.10  | trans-sialidase, putative                                 | 0,8826 | 0,2502     |
| TcCLB.510799.60  | mucin TcMUCII, putative                                   | 0,8825 | 0,0097     |
| TcCLB.506795.20  | hypothetical protein, conserved                           | 0,8823 | 6,992E-11  |
| TcCLB.409117.10  | hypothetical protein, conserved                           | 0,8823 | 0,00002509 |
| TcCLB.506401.250 | hypothetical protein, conserved                           | 0,8822 | 3,102E-23  |
| TcCLB.508711.30  | NADH dehydrogenase subunit NI8M, putative                 | 0,8822 | 5,409E-09  |
| TcCLB.510763.34  | hypothetical protein, conserved                           | 0,882  | 3,174E-07  |
| TcCLB.506499.130 | hypothetical protein                                      | 0,8819 | 0,2699     |
| TcCLB.508273.100 | mucin TcMUCI, putative                                    | 0,8816 | 0,02342    |
| TcCLB.508737.60  | hypothetical protein, conserved                           | 0,8814 | 1,493E-07  |
| TcCLB.511405.10  | mucin TcMUCI, putative                                    | 0,8812 | 0,1599     |
| TcCLB.505807.130 | hypothetical protein, conserved                           | 0,8809 | 0,000242   |
| TcCLB.511335.19  | hypothetical protein, conserved (pseudogene)              | 0,8808 | 0,0000123  |
| TcCLB.506931.60  | hypothetical protein                                      | 0,8807 | 6,251E-07  |
| TcCLB.511517.50  | hypothetical protein, conserved                           | 0,8794 | 4,563E-10  |
| TcCLB.506797.20  | hypothetical protein                                      | 0,8791 | 1,719E-21  |
| TcCLB.506775.60  | hypothetical protein, conserved                           | 0,8791 | 2,94E-15   |
| TcCLB.509683.80  | adenylosuccinate synthetase, putative                     | 0,8789 | 4,898E-10  |
| TcCLB.508887.24  | mucin-associated surface protein (MASP, pseudogene), pu   | 0,8787 | 0,2179     |
| TcCLB.511603.390 | mucin TcMUCII, putative                                   | 0,8785 | 0,3771     |
| TcCLB.510557.80  | mucin TcMUCII, putative                                   | 0,8784 | 0,09607    |
| TcCLB.511925.20  | hypothetical protein, conserved                           | 0,8783 | 1,086E-09  |
| TcCLB.509419.100 | mucin-associated surface protein (MASP, pseudogene), pu   | 0,8781 | 0,2087     |
| TcCLB.507083.100 | hypothetical protein, conserved                           | 0,878  | 7,649E-22  |
| TcCLB.503447.40  | retrotransposon hot spot (RHS) protein, putative          | 0,878  | 0,0004347  |
| TcCLB.507091.40  | dihydroorotate dehydrogenase, putative (DHODH)            | 0,8771 | 0,0001684  |
| TcCLB.506813.59  | mucin TcMUC (pseudogene), putative                        | 0,8771 | 0,09798    |
| TcCLB.509711.20  | retrotransposon hot spot protein (RHS, pseudogene), putat | 0,8764 | 0,06565    |

|                  |                                                                |        |            |
|------------------|----------------------------------------------------------------|--------|------------|
| TcCLB.505997.10  | retrotransposon hot spot (RHS) protein, putative               | 0,8762 | 1,238E-06  |
| TcCLB.506201.50  | hypothetical protein, conserved                                | 0,8761 | 0,0001372  |
| TcCLB.506661.30  | fatty acid elongase, putative                                  | 0,876  | 3,037E-25  |
| TcCLB.507429.30  | mucin TcMUCII, putative                                        | 0,8755 | 0,001873   |
| TcCLB.509065.9   | aldehyde dehydrogenase, putative (fragment)                    | 0,8754 | 1,398E-17  |
| TcCLB.511151.110 | surface protease GP63, putative (fragment)                     | 0,8754 | 7,207E-14  |
| TcCLB.505915.10  | retrotransposon hot spot protein (RHS, pseudogene), putative   | 0,8752 | 0,00000181 |
| TcCLB.511823.50  | palmitoyl acyltransferase 11, putative                         | 0,8748 | 3,588E-09  |
| TcCLB.505201.50  | trans-sialidase (pseudogene), putative                         | 0,8747 | 0,0001586  |
| TcCLB.507559.20  | hypothetical protein, conserved                                | 0,8745 | 2,537E-10  |
| TcCLB.506493.9   | hypothetical protein, conserved                                | 0,8745 | 3,273E-09  |
| TcCLB.508179.70  | GPR1/FUN34/yaaH family, putative                               | 0,8741 | 1,933E-09  |
| TcCLB.511153.40  | surface protease GP63, putative                                | 0,874  | 6,752E-16  |
| TcCLB.506175.120 | hypothetical protein, conserved                                | 0,8737 | 0,1296     |
| TcCLB.503699.19  | mucin-associated surface protein (MASP), putative              | 0,8737 | 0,1359     |
| TcCLB.507653.50  | retrotransposon hot spot protein (RHS, pseudogene), putative   | 0,8736 | 0,00002346 |
| TcCLB.508777.10  | hypothetical protein, conserved                                | 0,8728 | 1,582E-12  |
| TcCLB.511693.30  | hypothetical protein, conserved                                | 0,8725 | 1,136E-19  |
| TcCLB.511555.80  | ribonucleoside-diphosphate reductase small chain, putative     | 0,8725 | 5,275E-09  |
| TcCLB.510543.90  | retrotransposon hot spot (RHS) protein, putative               | 0,8725 | 0,0007949  |
| TcCLB.506751.90  | trans-sialidase (pseudogene), putative                         | 0,872  | 0,1174     |
| TcCLB.510137.40  | retrotransposon hot spot protein (RHS, pseudogene), putative   | 0,8719 | 1,881E-15  |
| TcCLB.506887.69  | dual specificity protein phosphatase, putative                 | 0,8718 | 3,258E-09  |
| TcCLB.510693.163 | mucin-associated surface protein (MASP), putative              | 0,8713 | 0,0003345  |
| TcCLB.507233.70  | trans-sialidase (pseudogene), putative                         | 0,871  | 1,663E-10  |
| TcCLB.510377.220 | mucin-associated surface protein (MASP, pseudogene), putative  | 0,8707 | 0,1063     |
| TcCLB.508693.190 | hypothetical protein, conserved                                | 0,8706 | 3,506E-21  |
| TcCLB.508285.10  | retrotransposon hot spot (RHS) protein, putative               | 0,8706 | 0,00008605 |
| TcCLB.511827.20  | hypothetical protein, conserved                                | 0,8703 | 1,396E-21  |
| TcCLB.511219.60  | retrotransposon hot spot protein (RHS, pseudogene), putative   | 0,8702 | 2,445E-06  |
| TcCLB.510371.40  | hypothetical protein                                           | 0,8701 | 0,1284     |
| TcCLB.504491.10  | hypothetical protein                                           | 0,8699 | 0,005655   |
| TcCLB.506499.190 | 90 kDa surface protein, putative                               | 0,8699 | 0,06365    |
| TcCLB.443403.9   | retrotransposon hot spot (RHS) protein, putative               | 0,8695 | 3,743E-08  |
| TcCLB.507643.15  | beta galactofuranosyl glycosyltransferase, putative (fragment) | 0,8695 | 0,007298   |
| TcCLB.509361.10  | surface protease GP63 (pseudogene), putative                   | 0,8692 | 0,2539     |
| TcCLB.510309.10  | hypothetical protein, conserved                                | 0,8689 | 4,702E-09  |
| TcCLB.509341.10  | hypothetical protein, conserved                                | 0,8686 | 2,002E-13  |
| TcCLB.508781.60  | hypothetical protein, conserved                                | 0,8685 | 8,641E-07  |
| TcCLB.503609.100 | mucin TcMUCII, putative                                        | 0,8685 | 0,3444     |
| TcCLB.508593.150 | puromycin-sensitive aminopeptidase-like protein, putative      | 0,8683 | 1,234E-15  |
| TcCLB.503579.20  | hypothetical protein, conserved                                | 0,8682 | 1,109E-10  |
| TcCLB.506659.35  | hypothetical protein, conserved                                | 0,8682 | 0,0001054  |
| TcCLB.508177.70  | hypothetical protein                                           | 0,8674 | 4,027E-16  |
| TcCLB.511019.13  | retrotransposon hot spot (RHS) protein, putative (fragment)    | 0,8673 | 1,117E-11  |

|                  |                                                              |        |            |
|------------------|--------------------------------------------------------------|--------|------------|
| TcCLB.504097.20  | hypothetical protein, conserved                              | 0,8672 | 1,231E-07  |
| TcCLB.507429.70  | mucin TcMUCII, putative                                      | 0,8668 | 0,000116   |
| TcCLB.509733.185 | hypothetical protein, conserved (pseudogene)                 | 0,8662 | 7,864E-09  |
| TcCLB.447899.10  | trans-sialidase, putative                                    | 0,8662 | 0,2548     |
| TcCLB.504125.120 | hypothetical protein, conserved                              | 0,8661 | 0,0000025  |
| TcCLB.510101.30  | 60S ribosomal protein L28, putative                          | 0,8657 | 1,847E-21  |
| TcCLB.505993.30  | trans-sialidase, Group VIII, putative                        | 0,8656 | 0,00008078 |
| TcCLB.509139.20  | hypothetical protein, conserved                              | 0,8653 | 1,546E-09  |
| TcCLB.511411.24  | hypothetical protein, conserved                              | 0,8649 | 1,034E-06  |
| TcCLB.510857.60  | cation-transporting ATPase, putative                         | 0,8648 | 3,01E-12   |
| TcCLB.507063.340 | mucin-associated surface protein (MASP), putative            | 0,8647 | 0,02274    |
| TcCLB.508719.80  | hypothetical protein, conserved                              | 0,8646 | 7,845E-08  |
| TcCLB.506867.30  | hypothetical protein, conserved                              | 0,8645 | 0,00008674 |
| TcCLB.510483.290 | hypothetical protein                                         | 0,8645 | 0,1477     |
| TcCLB.509179.20  | Macro domain containing protein, putative                    | 0,8644 | 2,601E-12  |
| TcCLB.506777.10  | ATP-dependent DEAD/H RNA helicase, putative                  | 0,8642 | 3,571E-10  |
| TcCLB.504797.30  | pseudouridylate synthase-like protein, putative              | 0,8641 | 4,134E-11  |
| TcCLB.506145.20  | hypothetical protein, conserved                              | 0,864  | 1,925E-18  |
| TcCLB.511249.20  | ADP/ATP translocase, putative                                | 0,864  | 2,908E-14  |
| TcCLB.509331.90  | AMPK subunit beta, putative (AMPKB)                          | 0,864  | 2,645E-11  |
| TcCLB.510101.300 | hypothetical protein, conserved                              | 0,8637 | 6,408E-28  |
| TcCLB.507971.20  | syntaxin binding protein (pseudogene), putative              | 0,8631 | 8,252E-16  |
| TcCLB.511033.29  | hypothetical protein                                         | 0,863  | 3,698E-09  |
| TcCLB.511545.199 | AMP deaminase, putative                                      | 0,8622 | 1,235E-07  |
| TcCLB.503781.90  | universal minicircle sequence binding protein 2, putative (l | 0,8621 | 4,735E-15  |
| TcCLB.510341.4   | Monooxygenase, putative (fragment)                           | 0,862  | 0,00001607 |
| TcCLB.509367.15  | tryptophanyl-tRNA synthetase (pseudogene), putative          | 0,8617 | 0,01335    |
| TcCLB.506285.110 | mucin-associated surface protein (MASP, pseudogene), pu      | 0,8616 | 0,1263     |
| TcCLB.508011.99  | mucin TcMUCII (pseudogene), putative                         | 0,8616 | 0,2005     |
| TcCLB.505699.20  | retrotransposon hot spot protein (RHS, pseudogene), putat    | 0,8614 | 0,00007053 |
| TcCLB.503891.120 | dynein light chain, putative                                 | 0,8613 | 2,161E-06  |
| TcCLB.510197.229 | trans-sialidase, putative                                    | 0,8613 | 0,008964   |
| TcCLB.508745.20  | mucin-associated surface protein (MASP), putative            | 0,8613 | 0,01678    |
| TcCLB.507691.61  | trans-sialidase (pseudogene), putative                       | 0,8612 | 0,0004143  |
| TcCLB.507663.20  | hypothetical protein, conserved                              | 0,8611 | 1,379E-10  |
| TcCLB.504769.160 | dispersed gene family protein 1 (DGF-1), putative            | 0,8607 | 0,00002842 |
| TcCLB.507965.10  | receptor-type adenylate cyclase, putative                    | 0,8604 | 1,147E-09  |
| TcCLB.506885.80  | hypothetical protein                                         | 0,8603 | 6,944E-11  |
| TcCLB.509695.220 | serine carboxypeptidase (CBP1), putative                     | 0,8601 | 1,189E-13  |
| TcCLB.511585.230 | trans-sialidase, Group II, putative                          | 0,8601 | 4,636E-07  |
| TcCLB.510971.5   | retrotransposon hot spot protein (RHS, pseudogene), putat    | 0,8596 | 1,863E-07  |
| TcCLB.508995.50  | hypothetical protein, conserved                              | 0,8595 | 9,321E-06  |
| TcCLB.511907.310 | hypothetical protein, conserved                              | 0,859  | 4,821E-17  |
| TcCLB.510859.24  | hypothetical protein, conserved                              | 0,859  | 8,091E-14  |
| TcCLB.480561.10  | trans-sialidase, putative                                    | 0,8589 | 0,0002398  |

|                  |                                                                  |        |            |
|------------------|------------------------------------------------------------------|--------|------------|
| TcCLB.508789.60  | mucin TcMUCII, putative                                          | 0,8586 | 0,008673   |
| TcCLB.509203.40  | glycosomal membrane protein, putative                            | 0,8585 | 3,131E-26  |
| TcCLB.510155.150 | hypothetical protein, conserved                                  | 0,8585 | 1,054E-11  |
| TcCLB.510033.22  | surface protease GP63 (pseudogene), putative                     | 0,8585 | 1,493E-06  |
| TcCLB.503771.90  | mucin-associated surface protein (MASP), putative                | 0,8585 | 0,1533     |
| TcCLB.507081.40  | hypothetical protein, conserved                                  | 0,8579 | 9,249E-09  |
| TcCLB.511405.40  | mucin TcMUCII (pseudogene), putative                             | 0,8579 | 0,1261     |
| TcCLB.506799.30  | mucin-like glycoprotein, putative                                | 0,8576 | 0,003058   |
| TcCLB.506955.250 | mucin TcMUCII, putative                                          | 0,8576 | 0,07348    |
| TcCLB.510103.17  | hypothetical protein, conserved                                  | 0,8573 | 2,373E-11  |
| TcCLB.503977.15  | surface protease GP63 (pseudogene), putative                     | 0,8573 | 0,1859     |
| TcCLB.510583.220 | mucin TcMUCII, putative                                          | 0,8572 | 0,3359     |
| TcCLB.507615.73  | hypothetical protein, conserved                                  | 0,8571 | 2,639E-16  |
| TcCLB.507589.14  | tryptophanyl-tRNA synthetase, putative                           | 0,8569 | 6,792E-34  |
| TcCLB.509897.230 | trans-sialidase (pseudogene), putative                           | 0,8564 | 0,00001762 |
| TcCLB.504883.60  | hypothetical protein, conserved                                  | 0,8562 | 2,299E-21  |
| TcCLB.507643.90  | beta galactofuranosyl glycosyltransferase (pseudogene), putative | 0,8561 | 3,975E-08  |
| TcCLB.508999.220 | calpain cysteine peptidase, putative                             | 0,856  | 6,055E-10  |
| TcCLB.503495.20  | retrotransposon hot spot protein (RHS, pseudogene), putative     | 0,8559 | 0,002057   |
| TcCLB.507981.51  | trans-sialidase (pseudogene), putative                           | 0,8554 | 0,0648     |
| TcCLB.506245.250 | trans-sialidase, Group V, putative                               | 0,8551 | 0,02318    |
| TcCLB.510741.140 | hypothetical protein, conserved                                  | 0,8545 | 3,552E-11  |
| TcCLB.509493.120 | hypothetical protein                                             | 0,8545 | 0,0005254  |
| TcCLB.504013.60  | regulatory subunit of protein kinase a-like protein, putative    | 0,8544 | 1,682E-13  |
| TcCLB.506725.70  | hypothetical protein, conserved                                  | 0,854  | 1,177E-12  |
| TcCLB.511135.30  | hypothetical protein, conserved                                  | 0,8539 | 2,02E-08   |
| TcCLB.507957.240 | mucin-associated surface protein (MASP), putative                | 0,8539 | 0,2186     |
| TcCLB.506775.40  | hypothetical protein, conserved                                  | 0,8537 | 1,147E-11  |
| TcCLB.507891.56  | flagellar calcium-binding protein, putative (fragment)           | 0,853  | 6,153E-11  |
| TcCLB.509747.104 | hypothetical protein, conserved                                  | 0,8529 | 1,921E-08  |
| TcCLB.506967.40  | mucin TcMUCII, putative                                          | 0,8528 | 0,1583     |
| TcCLB.511245.150 | fatty acid elongase, putative                                    | 0,8524 | 3,324E-10  |
| TcCLB.511431.54  | hypothetical protein                                             | 0,8523 | 0,006642   |
| TcCLB.504003.40  | hypothetical protein, conserved                                  | 0,8522 | 1,585E-14  |
| TcCLB.509019.10  | trans-sialidase (pseudogene), putative                           | 0,8518 | 2,662E-09  |
| TcCLB.507737.20  | hypothetical protein, conserved                                  | 0,8518 | 1,884E-08  |
| TcCLB.508173.110 | cysteine protease, putative                                      | 0,8516 | 3,092E-12  |
| TcCLB.508045.40  | hypothetical protein, conserved                                  | 0,8514 | 3,707E-12  |
| TcCLB.507119.20  | hypothetical protein, conserved (pseudogene)                     | 0,8513 | 2,676E-12  |
| TcCLB.510139.20  | surface protease GP63, putative                                  | 0,851  | 0,0054     |
| TcCLB.511903.190 | STOP axonemal protein, putative                                  | 0,8508 | 1,312E-10  |
| TcCLB.509439.10  | retrotransposon hot spot protein (RHS, pseudogene), putative     | 0,8508 | 0,01004    |
| TcCLB.510175.90  | retrotransposon hot spot (RHS) protein, putative                 | 0,85   | 1,229E-07  |
| TcCLB.506401.120 | 40S ribosomal protein S9, putative                               | 0,8499 | 3,387E-27  |
| TcCLB.510755.70  | hypothetical protein, conserved                                  | 0,8497 | 2,596E-08  |

|                  |                                                           |        |            |
|------------------|-----------------------------------------------------------|--------|------------|
| TcCLB.507501.20  | hypothetical protein, conserved                           | 0,8496 | 0,07445    |
| TcCLB.508567.30  | hypothetical protein                                      | 0,8492 | 0,00004457 |
| TcCLB.507975.70  | retrotransposon hot spot protein (RHS, pseudogene), putat | 0,8489 | 8,817E-14  |
| TcCLB.504149.220 | retrotransposon hot spot protein (RHS, pseudogene), putat | 0,8488 | 1,334E-08  |
| TcCLB.508219.140 | retrotransposon hot spot protein (RHS, pseudogene), putat | 0,8487 | 0,008961   |
| TcCLB.507993.110 | hypothetical protein, conserved                           | 0,8486 | 3,377E-09  |
| TcCLB.508173.170 | protein kinase, putative                                  | 0,8484 | 2,421E-16  |
| TcCLB.508973.20  | hypothetical protein, conserved                           | 0,848  | 1,04E-10   |
| TcCLB.510855.40  | proteasome regulatory non-ATPase subunit, putative        | 0,8479 | 2,527E-13  |
| TcCLB.506797.50  | hypothetical protein, conserved                           | 0,8479 | 6,464E-13  |
| TcCLB.507073.49  | hypothetical protein, conserved                           | 0,8477 | 9,356E-08  |
| TcCLB.508115.20  | trans-sialidase, putative                                 | 0,8476 | 0,2275     |
| TcCLB.507517.60  | ATPase subunit 9, putative                                | 0,8473 | 2,579E-12  |
| TcCLB.506227.20  | hypothetical protein, conserved                           | 0,8473 | 0,00001279 |
| TcCLB.506321.130 | mucin TcMUCII, putative                                   | 0,8472 | 0,09631    |
| TcCLB.507765.40  | hypothetical protein, conserved                           | 0,8464 | 3,307E-11  |
| TcCLB.511815.160 | hypothetical protein, conserved                           | 0,846  | 1,232E-17  |
| TcCLB.506247.470 | hypothetical protein, conserved                           | 0,8456 | 8,831E-19  |
| TcCLB.504797.50  | hypothetical protein, conserved                           | 0,8456 | 4,159E-13  |
| TcCLB.430895.16  | hypothetical protein, conserved (fragment)                | 0,8456 | 0,0007385  |
| TcCLB.447483.4   | Meckel syndrome type 1 protein, putative (fragment) (mks  | 0,8456 | 0,002002   |
| TcCLB.503611.40  | ribosomal protein L24, putative                           | 0,8443 | 0,02552    |
| TcCLB.508079.20  | fatty acyl CoA syntetase 1 (pseudogene), putative         | 0,8438 | 1,204E-12  |
| TcCLB.509331.50  | ribosomal RNA methyltransferase, putative                 | 0,8437 | 3,28E-08   |
| TcCLB.510237.120 | mucin-associated surface protein (MASP), putative         | 0,8437 | 0,01314    |
| TcCLB.506951.90  | trans-sialidase, Group IV, putative                       | 0,8435 | 0,0007741  |
| TcCLB.506559.350 | asparaginyl-tRNA synthetase, putative                     | 0,8434 | 4,282E-34  |
| TcCLB.509295.10  | dispersed gene family protein 1 (DGF-1), putative         | 0,8434 | 0,0006666  |
| TcCLB.505401.19  | dispersed gene family protein 1 (DGF-1), putative (fragme | 0,8428 | 0,00004167 |
| TcCLB.508891.30  | hypothetical protein, conserved                           | 0,8425 | 2,032E-18  |
| TcCLB.511467.10  | hypothetical protein, conserved                           | 0,8421 | 7,615E-10  |
| TcCLB.509765.60  | retrotransposon hot spot protein (RHS, pseudogene), putat | 0,8419 | 3,503E-09  |
| TcCLB.510513.70  | hypothetical protein, conserved                           | 0,8418 | 1,723E-09  |
| TcCLB.508231.174 | hypothetical protein, conserved                           | 0,8417 | 0,00004484 |
| TcCLB.508443.20  | heat shock protein-like protein, putative                 | 0,8416 | 9,499E-08  |
| TcCLB.506649.70  | fructose-1,6-bisphosphatase, cytosolic, putative          | 0,8411 | 1,445E-13  |
| TcCLB.506741.40  | mucin TcMUCII (pseudogene), putative                      | 0,8411 | 0,2302     |
| TcCLB.504153.200 | hypothetical protein, conserved                           | 0,8409 | 1,23E-08   |
| TcCLB.504147.340 | hypothetical protein, conserved                           | 0,8405 | 8,057E-17  |
| TcCLB.511235.31  | surface protease GP63, putative                           | 0,8405 | 0,2782     |
| TcCLB.510735.90  | hypothetical protein, conserved                           | 0,8403 | 1,639E-09  |
| TcCLB.506595.110 | AGP2beta-2, putative                                      | 0,8403 | 5,573E-08  |
| TcCLB.506657.20  | hypothetical protein, conserved                           | 0,8402 | 1,377E-09  |
| TcCLB.507849.80  | hypothetical protein, conserved                           | 0,8402 | 1,22E-07   |
| TcCLB.511183.350 | surface protease GP63 (pseudogene), putative              | 0,8401 | 0,08141    |



|                  |                                                           |        |           |
|------------------|-----------------------------------------------------------|--------|-----------|
| TcCLB.509207.150 | kinesin, putative                                         | 0,8398 | 8,218E-23 |
| TcCLB.509857.30  | hypothetical protein, conserved                           | 0,8394 | 9,627E-08 |
| TcCLB.509407.10  | hypothetical protein                                      | 0,8388 | 0,004402  |
| TcCLB.511825.210 | dephospho-CoA kinase, putative                            | 0,8382 | 4,528E-08 |
| TcCLB.511839.30  | mucin-associated surface protein (MASP), putative         | 0,8381 | 0,09624   |
| TcCLB.511213.89  | dispersed gene family protein 1 (DGF-1), putative (fragme | 0,8379 | 0,00795   |
| TcCLB.507509.80  | hypothetical protein, conserved                           | 0,8377 | 1,427E-12 |
| TcCLB.509671.189 | hypothetical protein, conserved                           | 0,8376 | 5,432E-07 |
| TcCLB.508707.10  | amino acid transporter, putative                          | 0,8374 | 0,003238  |
| TcCLB.511395.14  | hypothetical protein, conserved                           | 0,8372 | 0,0001878 |
| TcCLB.508505.4   | hypothetical protein, conserved                           | 0,8371 | 0,0001002 |
| TcCLB.509811.9   | surface protease GP63, putative                           | 0,8367 | 0,00834   |
| TcCLB.504153.140 | metallo-peptidase, Clan MF, Family M17                    | 0,8366 | 1,82E-19  |
| TcCLB.509647.130 | hypothetical protein, conserved                           | 0,8366 | 5,322E-10 |
| TcCLB.509175.9   | hypothetical protein, conserved                           | 0,8366 | 0,02212   |
| TcCLB.511817.90  | hypothetical protein, conserved                           | 0,8365 | 6,344E-08 |
| TcCLB.503617.10  | protein kinase, putative                                  | 0,8361 | 1,877E-16 |
| TcCLB.507889.10  | transaldolase, putative                                   | 0,8358 | 6,309E-12 |
| TcCLB.509211.30  | serine/threonine protein phosphatase, putative            | 0,8356 | 1,511E-08 |
| TcCLB.509695.130 | dynein arm light chain, putative                          | 0,8355 | 6,077E-08 |
| TcCLB.507223.10  | dynein heavy chain, cytosolic, putative                   | 0,8352 | 0,002648  |
| TcCLB.511871.110 | hypothetical protein, conserved                           | 0,835  | 5,919E-11 |
| TcCLB.507959.280 | mucin-associated surface protein (MASP), putative         | 0,8348 | 0,003894  |
| TcCLB.508555.34  | hypothetical protein, conserved                           | 0,8347 | 0,0003295 |
| TcCLB.509707.29  | phosphatidylinositol-4-phosphate 5-kinase-like protein    | 0,8345 | 0,001269  |
| TcCLB.509649.40  | hypothetical protein                                      | 0,8344 | 3,485E-13 |
| TcCLB.508887.5   | trans-sialidase, putative                                 | 0,8344 | 0,2599    |
| TcCLB.507711.130 | hypothetical protein, conserved                           | 0,8343 | 0,0001159 |
| TcCLB.511183.270 | mucin TcMUCII (pseudogene), putative                      | 0,834  | 0,1635    |
| TcCLB.508163.380 | trans-sialidase (pseudogene), putative                    | 0,8338 | 0,1291    |
| TcCLB.508625.160 | pumilio/PUF RNA binding protein 1, putative (PUF1)        | 0,8335 | 1,862E-14 |
| TcCLB.509165.34  | ribosomal P protein AGP2beta-1, putative                  | 0,8335 | 3,774E-08 |
| TcCLB.510715.140 | mucin-associated surface protein (MASP, pseudogene), pu   | 0,8332 | 0,04864   |
| TcCLB.506287.9   | hypothetical protein, conserved                           | 0,8331 | 1,248E-07 |
| TcCLB.508397.70  | transporter, putative                                     | 0,833  | 8,309E-08 |
| TcCLB.408445.10  | trans-sialidase, putative (fragment)                      | 0,8329 | 0,09555   |
| TcCLB.509151.130 | deoxyuridine triphosphatase, putative                     | 0,8328 | 3,474E-17 |
| TcCLB.508465.90  | galactokinase, putative                                   | 0,8326 | 2,876E-13 |
| TcCLB.510603.80  | protein tyrosine phosphatase-like protein, putative       | 0,8324 | 1,195E-08 |
| TcCLB.507611.110 | retrotransposon hot spot (RHS) protein, putative          | 0,8324 | 5,586E-07 |
| TcCLB.505193.80  | hypothetical protein, conserved                           | 0,8315 | 1,826E-09 |
| TcCLB.511817.220 | kinesin, putative                                         | 0,8314 | 1,354E-16 |
| TcCLB.507089.240 | hypothetical protein, conserved                           | 0,831  | 7,953E-07 |
| TcCLB.424795.10  | hypothetical protein, conserved                           | 0,8306 | 2,234E-07 |
| TcCLB.508277.40  | divalent cation transporter, putative                     | 0,8305 | 5,808E-28 |

|                   |                                                               |        |            |
|-------------------|---------------------------------------------------------------|--------|------------|
| TcCLB.510021.200  | mucin TcMUCII, putative                                       | 0,8299 | 0,3201     |
| TcCLB.508253.10   | mucin-associated surface protein (MASP), putative             | 0,8298 | 0,0001687  |
| TcCLB.507051.11   | trans-sialidase, putative (fragment)                          | 0,8296 | 0,102      |
| TcCLB.510357.140  | hypothetical protein, conserved                               | 0,8294 | 0,00005621 |
| TcCLB.510491.70   | hypothetical protein                                          | 0,8289 | 0,0005951  |
| TcCLB.506181.10   | hypothetical protein, conserved                               | 0,8288 | 3,707E-08  |
| TcCLB.506595.90   | damage-specific DNA binding protein (pseudogene), putative    | 0,8287 | 1,12E-12   |
| TcCLB.506173.80   | hypothetical protein                                          | 0,8287 | 0,1935     |
| TcCLB.511395.120  | UDP-Gal or UDP-GlcNAc-dependent glycosyltransferase, putative | 0,8286 | 0,001568   |
| TcCLB.506435.420  | hypothetical protein, conserved                               | 0,8283 | 0,00001316 |
| TcCLB.510025.210  | mucin TcMUCII, putative                                       | 0,828  | 0,194      |
| TcCLB.506759.80   | mucin-associated surface protein (MASP), putative             | 0,8276 | 0,1401     |
| TcCLB.506271.20   | N-acetyltransferase complex ARD1 subunit (pseudogene),        | 0,8276 | 0,1587     |
| TcCLB.509365.11   | tryptophanyl-tRNA synthetase (pseudogene), putative           | 0,8275 | 0,001877   |
| TcCLB.506173.200  | retrotransposon hot spot protein (RHS, pseudogene), putative  | 0,8273 | 0,0001704  |
| TcCLB.508153.1000 | hypothetical protein, conserved                               | 0,8271 | 1,993E-06  |
| TcCLB.509753.300  | mucin TcMUCII, putative                                       | 0,8271 | 0,3374     |
| TcCLB.506511.40   | hypothetical protein, conserved                               | 0,8269 | 2,594E-09  |
| TcCLB.511285.30   | hypothetical protein, conserved                               | 0,8268 | 2,105E-09  |
| TcCLB.506593.19   | ribosomal protein S7, putative                                | 0,8266 | 6,103E-29  |
| TcCLB.508093.29   | hypothetical protein, conserved (pseudogene)                  | 0,8263 | 0,04831    |
| TcCLB.511523.20   | hypothetical protein, conserved                               | 0,8255 | 7,313E-08  |
| TcCLB.506589.80   | surface protease GP63 (pseudogene), putative                  | 0,8253 | 0,133      |
| TcCLB.511525.20   | hypothetical protein, conserved                               | 0,825  | 3,192E-15  |
| TcCLB.507603.90   | hypothetical protein                                          | 0,8249 | 6,356E-11  |
| TcCLB.454787.20   | elongation factor 1-gamma (EF-1-gamma, pseudogene), putative  | 0,8249 | 0,129      |
| TcCLB.510469.10   | mucin-associated surface protein (MASP), putative             | 0,8248 | 0,3163     |
| TcCLB.511809.110  | hypothetical protein, conserved                               | 0,8247 | 1,739E-14  |
| TcCLB.509905.200  | trans-sialidase, Group II, putative                           | 0,8247 | 1,154E-13  |
| TcCLB.506201.80   | serine/threonine-protein phosphatase PP1, putative            | 0,8246 | 0,006001   |
| TcCLB.510717.10   | surface antigen TASV, putative                                | 0,8242 | 5,455E-11  |
| TcCLB.506427.10   | trans-sialidase, Group VIII, putative                         | 0,8235 | 0,01949    |
| TcCLB.509979.20   | hypothetical protein, conserved                               | 0,8231 | 4,235E-10  |
| TcCLB.510311.90   | quinone oxidoreductase, putative                              | 0,823  | 2,465E-19  |
| TcCLB.510279.130  | mucin TcMUCII, putative                                       | 0,823  | 0,1803     |
| TcCLB.511847.30   | hypothetical protein, conserved                               | 0,8225 | 2,42E-08   |
| TcCLB.504787.40   | trans-sialidase, Group V, putative                            | 0,8225 | 0,04661    |
| TcCLB.506737.161  | mucin TcMUCI, putative                                        | 0,8222 | 0,002443   |
| TcCLB.508221.284  | retrotransposon hot spot protein (RHS, pseudogene), putative  | 0,8222 | 0,03921    |
| TcCLB.506667.30   | 90 kDa surface protein, putative                              | 0,822  | 0,009023   |
| TcCLB.510439.50   | hypothetical protein, conserved                               | 0,8219 | 4,526E-11  |
| TcCLB.510947.40   | agmatinase, putative                                          | 0,8218 | 3,09E-08   |
| TcCLB.505207.20   | beta galactofuranosyl glycosyltransferase, putative           | 0,8218 | 0,002014   |
| TcCLB.509419.190  | mucin-associated surface protein (MASP, pseudogene), putative | 0,8218 | 0,3504     |
| TcCLB.510719.60   | Biotin--acetyl-CoA-carboxylase ligase, putative               | 0,8216 | 1,131E-09  |

|                  |                                                               |        |           |
|------------------|---------------------------------------------------------------|--------|-----------|
| TcCLB.504013.40  | serine acetyltransferase, putative (SAT)                      | 0,8212 | 8,646E-11 |
| TcCLB.506767.40  | mucin-associated surface protein (MASP), putative             | 0,8211 | 0,04238   |
| TcCLB.506757.20  | hypothetical protein, conserved                               | 0,8207 | 4,006E-09 |
| TcCLB.510101.190 | hypothetical protein, conserved                               | 0,8206 | 1,078E-08 |
| TcCLB.510731.59  | dual specificity protein phosphatase, putative                | 0,8206 | 2,089E-07 |
| TcCLB.510609.70  | protein kinase, putative                                      | 0,8205 | 2,866E-16 |
| TcCLB.511819.30  | hypothetical protein, conserved                               | 0,8199 | 1,72E-07  |
| TcCLB.510945.50  | hypothetical protein, conserved                               | 0,8198 | 9,282E-18 |
| TcCLB.509225.30  | trans-sialidase (pseudogene), putative                        | 0,8198 | 2,123E-08 |
| TcCLB.511807.33  | expression site-associated gene (ESAG-like) protein, putative | 0,8195 | 2,924E-10 |
| TcCLB.510359.420 | mucin-associated surface protein (MASP, pseudogene), putative | 0,8193 | 0,001298  |
| TcCLB.508473.10  | retrotransposon hot spot (RHS) protein, putative              | 0,8192 | 2,539E-16 |
| TcCLB.511817.30  | hypothetical protein, conserved                               | 0,8189 | 0,0000147 |
| TcCLB.509207.120 | hypothetical protein, conserved                               | 0,8187 | 7,787E-19 |
| TcCLB.509801.20  | hypothetical protein, conserved                               | 0,8186 | 3,251E-09 |
| TcCLB.506451.50  | trans-sialidase (pseudogene), putative                        | 0,8183 | 0,06876   |
| TcCLB.504233.4   | trifunctional enzyme alpha subunit, mitochondrial precursor   | 0,8182 | 0,08134   |
| TcCLB.509331.80  | hypothetical protein, conserved                               | 0,8181 | 8,953E-08 |
| TcCLB.506951.30  | trans-sialidase (pseudogene), putative                        | 0,8181 | 0,01976   |
| TcCLB.507603.140 | leucine-rich repeat protein (LRRP), putative                  | 0,8179 | 1,553E-10 |
| TcCLB.506697.80  | Present in the outer mitochondrial membrane proteome 2        | 0,8178 | 9,815E-07 |
| TcCLB.509029.40  | hypothetical protein, conserved                               | 0,8176 | 1,213E-12 |
| TcCLB.504137.80  | adenylyl cyclase-associated protein, putative                 | 0,8176 | 1,035E-10 |
| TcCLB.509879.40  | fumarate hydratase, putative                                  | 0,8176 | 1,129E-08 |
| TcCLB.510309.40  | 60S acidic ribosomal protein P2, putative                     | 0,8172 | 0,0000613 |
| TcCLB.507245.10  | retrotransposon hot spot protein (RHS, pseudogene), putative  | 0,8168 | 5,324E-07 |
| TcCLB.508539.160 | mucin-associated surface protein (MASP), putative             | 0,8163 | 0,01775   |
| TcCLB.508493.50  | mucin-associated surface protein (MASP, pseudogene), putative | 0,8163 | 0,02226   |
| TcCLB.511647.70  | hypothetical protein, conserved                               | 0,8161 | 5,454E-09 |
| TcCLB.503957.10  | trans-sialidase, putative                                     | 0,8158 | 0,0002354 |
| TcCLB.511285.40  | hypothetical protein, conserved                               | 0,8152 | 3,285E-08 |
| TcCLB.506343.30  | retrotransposon hot spot protein (RHS, pseudogene), putative  | 0,8151 | 1,044E-15 |
| TcCLB.505365.60  | trans-sialidase, Group VIII, putative                         | 0,815  | 0,3279    |
| TcCLB.505843.10  | glutamate dehydrogenase, putative                             | 0,8149 | 2,014E-17 |
| TcCLB.509211.10  | hypothetical protein, conserved                               | 0,8148 | 1,31E-09  |
| TcCLB.510303.204 | hypothetical protein, conserved                               | 0,8147 | 7,53E-11  |
| TcCLB.506401.80  | hypothetical protein, conserved                               | 0,8144 | 1,109E-18 |
| TcCLB.510533.50  | hypothetical protein, conserved                               | 0,8143 | 0,0001812 |
| TcCLB.510729.230 | hypothetical protein, conserved                               | 0,8142 | 7,768E-13 |
| TcCLB.506485.60  | hypothetical protein, conserved                               | 0,814  | 6,416E-13 |
| TcCLB.510373.70  | mucin TcMUCII, putative                                       | 0,814  | 0,3433    |
| TcCLB.506281.50  | mucin TcMUCII, putative                                       | 0,8139 | 0,00171   |
| TcCLB.507251.30  | hypothetical protein, conserved                               | 0,8138 | 1,217E-12 |
| TcCLB.506529.260 | chaperone DNAJ protein, putative                              | 0,8137 | 4,262E-11 |
| TcCLB.509905.10  | trans-sialidase (pseudogene), putative                        | 0,8137 | 7,795E-09 |

|                  |                                                             |        |            |
|------------------|-------------------------------------------------------------|--------|------------|
| TcCLB.505165.10  | RNA-binding protein, putative                               | 0,8134 | 0,1469     |
| TcCLB.510039.60  | hypothetical protein, conserved                             | 0,8133 | 2,832E-18  |
| TcCLB.506649.4   | hypothetical protein, conserved                             | 0,8132 | 0,00006246 |
| TcCLB.507167.259 | trans-sialidase (pseudogene), putative                      | 0,8132 | 0,02034    |
| TcCLB.511817.190 | hypothetical protein, conserved                             | 0,8129 | 1,316E-10  |
| TcCLB.506963.70  | hypothetical protein, conserved                             | 0,8127 | 3,592E-07  |
| TcCLB.509601.70  | vacuolar proton translocating ATPase subunit A, putative (\ | 0,8126 | 4,026E-17  |
| TcCLB.510861.70  | hypothetical protein, conserved                             | 0,8123 | 9,844E-09  |
| TcCLB.478463.10  | hypothetical protein                                        | 0,8123 | 0,4678     |
| TcCLB.507501.10  | retrotransposon hot spot (RHS) protein, putative            | 0,8121 | 1,994E-51  |
| TcCLB.510945.60  | hypothetical protein, conserved                             | 0,8116 | 1,047E-14  |
| TcCLB.507755.10  | hypothetical protein                                        | 0,8116 | 1,347E-07  |
| TcCLB.506773.70  | transcription modulator/accessory protein, putative         | 0,8106 | 5,145E-19  |
| TcCLB.509997.20  | tryparedoxin 2, putative (TXN2)                             | 0,8103 | 9,608E-12  |
| TcCLB.511303.64  | hypothetical protein, conserved                             | 0,8102 | 2,262E-10  |
| TcCLB.506593.40  | hypothetical protein, conserved                             | 0,8102 | 7,337E-08  |
| TcCLB.511259.80  | mucin TcMUCII, putative                                     | 0,8101 | 0,1133     |
| TcCLB.511727.250 | hypothetical protein, conserved                             | 0,81   | 4,633E-17  |
| TcCLB.510101.290 | hypothetical protein, conserved                             | 0,8096 | 3,308E-29  |
| TcCLB.503609.60  | mucin-associated surface protein (MASP), putative           | 0,8093 | 0,1144     |
| TcCLB.504339.10  | hypothetical protein, conserved                             | 0,8092 | 0,008848   |
| TcCLB.509149.20  | zinc finger protein family member, putative (POMP35)        | 0,809  | 3,301E-08  |
| TcCLB.510101.410 | hypothetical protein, conserved                             | 0,8087 | 3,465E-12  |
| TcCLB.507641.250 | hypothetical protein                                        | 0,8087 | 0,0000083  |
| TcCLB.505333.30  | hypothetical protein, conserved (pseudogene)                | 0,8086 | 0,03716    |
| TcCLB.506245.210 | mucin TcMUCII, putative                                     | 0,8083 | 0,1138     |
| TcCLB.505763.10  | proton motive ATPase 1, putative                            | 0,8082 | 4,482E-34  |
| TcCLB.504149.190 | hypothetical protein, conserved (pseudogene)                | 0,8081 | 1,452E-16  |
| TcCLB.506779.44  | hypothetical protein, conserved                             | 0,8081 | 0,0004679  |
| TcCLB.509525.220 | mucin TcMUCII, putative                                     | 0,8081 | 0,4003     |
| TcCLB.508999.120 | trans-sialidase (pseudogene), putative                      | 0,8079 | 0,03661    |
| TcCLB.504057.150 | hypothetical protein, conserved                             | 0,8076 | 1,814E-10  |
| TcCLB.507275.50  | hypothetical protein, conserved                             | 0,8076 | 3,866E-10  |
| TcCLB.507085.60  | mucin TcMUCII, putative                                     | 0,8072 | 0,02007    |
| TcCLB.506863.20  | hypothetical protein                                        | 0,8071 | 0,0000013  |
| TcCLB.510533.70  | protein kinase, putative                                    | 0,807  | 6,016E-07  |
| TcCLB.510643.140 | 60S acidic ribosomal protein P2, putative                   | 0,8066 | 5,849E-16  |
| TcCLB.511393.79  | hypothetical protein, conserved                             | 0,8066 | 2,62E-07   |
| TcCLB.508641.240 | hypothetical protein, conserved                             | 0,8065 | 1,972E-08  |
| TcCLB.506499.220 | 90 kDa surface protein, putative                            | 0,8064 | 0,06201    |
| TcCLB.510303.210 | 2,4-dienoyl-coa reductase-like protein, putative            | 0,8063 | 2,728E-23  |
| TcCLB.506331.50  | trans-sialidase (pseudogene), putative                      | 0,8062 | 0,03394    |
| TcCLB.506529.508 | glucose-6-phosphate isomerase, glycosomal, putative         | 0,8061 | 3,354E-18  |
| TcCLB.509905.170 | trans-sialidase, Group VIII, putative                       | 0,8058 | 0,0001189  |
| TcCLB.509943.11  | cAMP specific phosphodiesterase, putative                   | 0,8057 | 0,0612     |

|                  |                                                            |        |            |
|------------------|------------------------------------------------------------|--------|------------|
| TcCLB.503665.40  | surface protease GP63 (pseudogene), putative               | 0,8056 | 0,002532   |
| TcCLB.506243.94  | retrotransposon hot spot protein (RHS, pseudogene), putat  | 0,8055 | 0,00004179 |
| TcCLB.506999.100 | hypothetical protein, conserved                            | 0,8046 | 0,00000736 |
| TcCLB.505955.30  | surface protease GP63 (pseudogene), putative               | 0,8041 | 0,008589   |
| TcCLB.510621.60  | mucin-associated surface protein (MASP), putative          | 0,8039 | 0,1838     |
| TcCLB.508017.20  | UDP-Gal or UDP-GlcNAc-dependent glycosyltransferase (p:    | 0,8037 | 0,02741    |
| TcCLB.508389.70  | trans-sialidase (pseudogene), putative                     | 0,8036 | 0,03481    |
| TcCLB.504081.141 | syntaxin binding protein (pseudogene), putative            | 0,8034 | 0,1484     |
| TcCLB.504109.160 | electron transfer flavoprotein, putative                   | 0,803  | 1,018E-18  |
| TcCLB.511773.10  | retrotransposon hot spot protein (RHS, pseudogene), putat  | 0,803  | 7,47E-08   |
| TcCLB.504425.10  | trans-sialidase, Group III, putative                       | 0,8029 | 8,078E-08  |
| TcCLB.510889.4   | hypothetical protein, conserved                            | 0,8029 | 0,07455    |
| TcCLB.503613.30  | DNA repair protein, putative                               | 0,8025 | 4,198E-08  |
| TcCLB.510347.60  | protein kinase, putative                                   | 0,8022 | 1,838E-08  |
| TcCLB.510939.25  | mucin TcMUCI, putative                                     | 0,8021 | 0,02787    |
| TcCLB.507085.80  | trans-sialidase (pseudogene), putative                     | 0,8019 | 9,074E-06  |
| TcCLB.508043.40  | kinesin, putative                                          | 0,8014 | 1,617E-14  |
| TcCLB.506813.130 | beta galactofuranosyl glycosyltransferase (pseudogene), pi | 0,8014 | 0,1536     |
| TcCLB.507669.230 | hypothetical protein, conserved                            | 0,8013 | 1,336E-15  |
| TcCLB.508231.190 | ABC transporter, putative                                  | 0,8013 | 2,109E-12  |
| TcCLB.508799.130 | hypothetical protein, conserved                            | 0,8009 | 6,108E-16  |
| TcCLB.507009.10  | Gim5A protein, putative                                    | 0,8009 | 8,043E-08  |
| TcCLB.506015.20  | surface protease GP63, putative                            | 0,8009 | 0,00003877 |
| TcCLB.506813.5   | hypothetical protein                                       | 0,8009 | 0,02491    |
| TcCLB.506741.150 | surface protease GP63 (pseudogene), putative               | 0,8009 | 0,3388     |
| TcCLB.507625.99  | gamma-glutamylcysteine synthetase, putative                | 0,8003 | 1,656E-12  |
| TcCLB.508163.280 | mucin TcMUCII, putative                                    | 0,8003 | 0,1584     |
| TcCLB.506753.15  | dispersed gene family protein 1 (DGF-1, pseudogene), putat | 0,8002 | 0,4988     |
| TcCLB.509207.140 | hypothetical protein, conserved                            | 0,8    | 1,139E-13  |
| TcCLB.506885.413 | glyceraldehyde-3-phosphate dehydrogenase, putative         | 0,7999 | 3,851E-08  |
| TcCLB.506289.94  | mucin-like glycoprotein, putative                          | 0,7999 | 0,03908    |
| TcCLB.505025.30  | mucin TcMUCII, putative                                    | 0,7996 | 0,1622     |
| TcCLB.507093.160 | hypothetical protein, conserved                            | 0,7995 | 1,892E-09  |
| TcCLB.507079.20  | dynein heavy chain, cytosolic, putative                    | 0,7995 | 5,331E-08  |
| TcCLB.506769.90  | surface protease GP63, putative                            | 0,7992 | 0,09597    |
| TcCLB.511567.20  | retrotransposon hot spot protein (RHS, pseudogene), putat  | 0,799  | 0,001815   |
| TcCLB.506825.120 | hypothetical protein, conserved                            | 0,7986 | 7,093E-24  |
| TcCLB.506123.60  | hypothetical protein, conserved                            | 0,7986 | 4,464E-08  |
| TcCLB.507857.60  | Dynein intermediate chain 1, axonemal (DNAI1)              | 0,7985 | 1,229E-08  |
| TcCLB.507307.30  | peptidylprolyl isomerase (pseudogene), putative            | 0,7982 | 0,2361     |
| TcCLB.506853.70  | hypothetical protein, conserved                            | 0,7981 | 5,321E-09  |
| TcCLB.510927.20  | trans-sialidase (pseudogene), putative                     | 0,7979 | 0,0001541  |
| TcCLB.505007.10  | RNA-binding protein, putative                              | 0,7978 | 0,00001903 |
| TcCLB.506885.40  | hypothetical protein, conserved                            | 0,7968 | 1,222E-11  |
| TcCLB.511259.130 | mucin TcMUCII, putative                                    | 0,7965 | 0,06831    |

|                  |                                                           |        |            |
|------------------|-----------------------------------------------------------|--------|------------|
| TcCLB.509875.140 | retrotransposon hot spot protein (RHS, pseudogene), putat | 0,7965 | 0,08158    |
| TcCLB.421619.10  | hypothetical protein                                      | 0,7964 | 9,241E-11  |
| TcCLB.506351.20  | hypothetical protein, conserved                           | 0,7961 | 5,501E-06  |
| TcCLB.511531.50  | glucosamine-6-phosphate isomerase, putative               | 0,7959 | 4,143E-18  |
| TcCLB.505945.69  | hypothetical protein, conserved                           | 0,7953 | 0,002619   |
| TcCLB.509733.40  | hypothetical protein, conserved                           | 0,7948 | 3,603E-09  |
| TcCLB.506363.70  | amidohydrolase, putative                                  | 0,7942 | 0,00001527 |
| TcCLB.504579.20  | trans-sialidase (pseudogene), putative                    | 0,7941 | 1,058E-07  |
| TcCLB.509549.140 | trans-sialidase, putative                                 | 0,794  | 0,0003032  |
| TcCLB.504255.20  | hypothetical protein                                      | 0,7934 | 1,55E-12   |
| TcCLB.506763.50  | mucin-associated surface protein (MASP), putative         | 0,7931 | 0,1384     |
| TcCLB.503447.50  | trans-sialidase, Group IV, putative                       | 0,7929 | 0,003961   |
| TcCLB.503417.50  | hypothetical protein                                      | 0,7929 | 0,01418    |
| TcCLB.507221.50  | hypothetical protein, conserved                           | 0,7928 | 8,372E-06  |
| TcCLB.510197.210 | mucin TcMUCII, putative                                   | 0,7927 | 0,1512     |
| TcCLB.506869.54  | hypothetical protein, conserved                           | 0,7926 | 4,079E-06  |
| TcCLB.509461.30  | hypothetical protein, conserved                           | 0,7925 | 1,32E-09   |
| TcCLB.509725.126 | N-acetyltransferase complex ARD1 subunit (pseudogene),    | 0,7922 | 0,04111    |
| TcCLB.511101.19  | retrotransposon hot spot (RHS) protein, putative          | 0,792  | 0,00008483 |
| TcCLB.510693.176 | mucin TcMUC (pseudogene), putative                        | 0,7918 | 0,02846    |
| TcCLB.507473.10  | hypothetical protein                                      | 0,7915 | 1,346E-13  |
| TcCLB.506337.100 | surface antigen TASV, putative                            | 0,7915 | 1,419E-10  |
| TcCLB.510089.100 | hypothetical protein                                      | 0,7909 | 4,167E-08  |
| TcCLB.510275.405 | hypothetical protein                                      | 0,7908 | 0,05632    |
| TcCLB.509153.60  | lipin, putative                                           | 0,7907 | 1,971E-15  |
| TcCLB.510207.10  | mucin TcMUCII, putative                                   | 0,7907 | 0,1912     |
| TcCLB.504153.120 | hypothetical protein, conserved                           | 0,7905 | 1,718E-20  |
| TcCLB.511819.10  | hypothetical protein, conserved                           | 0,7904 | 3,901E-10  |
| TcCLB.506623.20  | trans-sialidase (pseudogene), putative                    | 0,7904 | 0,05831    |
| TcCLB.509225.11  | trans-sialidase, putative                                 | 0,7903 | 0,09994    |
| TcCLB.510187.520 | hypothetical protein, conserved                           | 0,7901 | 3,878E-08  |
| TcCLB.507777.30  | retrotransposon hot spot protein (RHS, pseudogene), putat | 0,7899 | 5,016E-08  |
| TcCLB.452699.10  | retrotransposon hot spot protein (RHS, pseudogene), putat | 0,7899 | 1,608E-06  |
| TcCLB.507811.40  | hypothetical protein, conserved                           | 0,7898 | 9,631E-13  |
| TcCLB.511257.110 | mucin-like glycoprotein, putative                         | 0,7898 | 0,04764    |
| TcCLB.508859.40  | leucine-rich repeat protein (LRRP), putative              | 0,7895 | 7,225E-07  |
| TcCLB.506223.20  | hypothetical protein, conserved                           | 0,7894 | 0,00002259 |
| TcCLB.413293.20  | hypothetical protein                                      | 0,7894 | 0,1336     |
| TcCLB.510719.210 | hypothetical protein, conserved                           | 0,7891 | 1,371E-08  |
| TcCLB.504213.90  | inositol polyphosphate kinase-like protein, putative      | 0,789  | 0,06403    |
| TcCLB.509531.10  | trans-sialidase, putative (fragment)                      | 0,7889 | 0,08377    |
| TcCLB.511809.99  | 40S ribosomal protein S15, putative                       | 0,7888 | 3,341E-08  |
| TcCLB.506227.205 | hypothetical protein, conserved                           | 0,7888 | 0,00003147 |
| TcCLB.509223.60  | beta galactofuranosyl glycosyltransferase, putative       | 0,7888 | 0,005011   |
| TcCLB.511277.110 | citrate synthase, putative                                | 0,7887 | 0,08069    |

|                  |                                                           |        |            |
|------------------|-----------------------------------------------------------|--------|------------|
| TcCLB.508277.310 | hypothetical protein                                      | 0,7882 | 7,235E-06  |
| TcCLB.508561.10  | dispersed gene family protein 1 (DGF-1), putative         | 0,7882 | 0,02405    |
| TcCLB.508789.100 | trans-sialidase (pseudogene), putative                    | 0,7882 | 0,05544    |
| TcCLB.504105.100 | hypothetical protein                                      | 0,788  | 6,219E-10  |
| TcCLB.509331.110 | hypothetical protein, conserved                           | 0,7878 | 9,955E-13  |
| TcCLB.510187.120 | hypothetical protein, conserved                           | 0,7878 | 5,712E-09  |
| TcCLB.503635.10  | protein kinase, putative                                  | 0,7872 | 8,316E-13  |
| TcCLB.505655.20  | hypothetical protein                                      | 0,7872 | 0,07703    |
| TcCLB.506825.30  | hypothetical protein, conserved                           | 0,7869 | 5,994E-11  |
| TcCLB.504185.30  | hypothetical protein, conserved                           | 0,7865 | 2,144E-06  |
| TcCLB.503685.5   | RNA-binding protein, putative (fragment)                  | 0,7859 | 0,1605     |
| TcCLB.506519.60  | Protein kinase domain, putative                           | 0,7858 | 1,207E-07  |
| TcCLB.504797.40  | thioredoxin, putative                                     | 0,7855 | 4,313E-07  |
| TcCLB.511537.69  | hypothetical protein, conserved                           | 0,7854 | 1,383E-13  |
| TcCLB.510337.20  | calpain-like cysteine peptidase, putative                 | 0,7847 | 3,856E-06  |
| TcCLB.503837.30  | hypothetical protein, conserved                           | 0,7844 | 0,00000661 |
| TcCLB.503831.20  | oxidoreductase, putative                                  | 0,7842 | 0,00001823 |
| TcCLB.507957.229 | mucin TcMUCII, putative                                   | 0,7842 | 0,08436    |
| TcCLB.508929.10  | UDP-Gal or UDP-GlcNAc-dependent glycosyltransferase, pu   | 0,7841 | 0,003552   |
| TcCLB.504247.50  | hypothetical protein, conserved                           | 0,784  | 0,00000227 |
| TcCLB.511641.10  | hypothetical protein, conserved                           | 0,7832 | 0,00001084 |
| TcCLB.508045.10  | hypothetical protein, conserved                           | 0,7831 | 3,488E-11  |
| TcCLB.504643.30  | ubiquitin-conjugating enzyme E2, putative                 | 0,7825 | 5,12E-14   |
| TcCLB.506057.20  | retrotransposon hot spot protein (RHS, pseudogene), putat | 0,7824 | 0,0001104  |
| TcCLB.511649.94  | hypothetical protein, conserved                           | 0,7823 | 2,774E-07  |
| TcCLB.506321.10  | mucin TcMUCII, putative                                   | 0,7823 | 0,1065     |
| TcCLB.510503.50  | trans-sialidase, Group V, putative                        | 0,7821 | 0,001265   |
| TcCLB.503665.30  | mucin-associated surface protein (MASP), putative         | 0,7821 | 0,04083    |
| TcCLB.511517.130 | hypothetical protein, conserved                           | 0,782  | 7,427E-12  |
| TcCLB.511649.50  | hypothetical protein, conserved                           | 0,782  | 1,707E-07  |
| TcCLB.510431.30  | amino acid permease, putative                             | 0,7819 | 8,392E-09  |
| TcCLB.510719.74  | hypothetical protein, conserved                           | 0,7819 | 6,887E-06  |
| TcCLB.504231.5   | hypothetical protein, conserved (pseudogene)              | 0,7818 | 0,01396    |
| TcCLB.510421.180 | casein kinase I, putative                                 | 0,7817 | 2,412E-06  |
| TcCLB.510203.19  | surface protease GP63 (pseudogene), putative              | 0,7817 | 0,1902     |
| TcCLB.506829.30  | hypothetical protein, conserved                           | 0,7814 | 0,00007205 |
| TcCLB.503747.30  | hypothetical protein                                      | 0,781  | 0,0004637  |
| TcCLB.511277.100 | hypothetical protein, conserved                           | 0,7809 | 2,852E-06  |
| TcCLB.508175.220 | hypothetical protein, conserved                           | 0,7804 | 4,833E-11  |
| TcCLB.508543.90  | plasma membrane Ca <sup>2+</sup> ATPase                   | 0,7803 | 7,436E-15  |
| TcCLB.506925.64  | hypothetical protein, conserved                           | 0,7801 | 1,16E-13   |
| TcCLB.510497.114 | mucin-associated surface protein (MASP, pseudogene), pu   | 0,7801 | 0,2685     |
| TcCLB.509233.160 | alpha-tubulin N-acetyltransferase, putative               | 0,78   | 7,377E-07  |
| TcCLB.510135.10  | retrotransposon hot spot protein (RHS, pseudogene), putat | 0,7798 | 0,00003352 |
| TcCLB.504217.19  | mitochondrial carrier protein, putative                   | 0,7795 | 1,358E-06  |

|                  |                                                               |        |            |
|------------------|---------------------------------------------------------------|--------|------------|
| TcCLB.511427.19  | conserved protein, unknown function (fragment)                | 0,7795 | 0,07063    |
| TcCLB.508221.490 | mucin-associated surface protein (MASP), putative             | 0,7794 | 0,3869     |
| TcCLB.507237.60  | surface protease GP63 (pseudogene), putative                  | 0,7787 | 0,01182    |
| TcCLB.511315.56  | hypothetical protein, conserved                               | 0,7787 | 0,05332    |
| TcCLB.507881.20  | retrotransposon hot spot (RHS) protein, putative              | 0,7783 | 1,22E-10   |
| TcCLB.510879.190 | hypothetical protein, conserved                               | 0,7781 | 8,496E-08  |
| TcCLB.506357.120 | ethanolamine phosphotransferase, putative                     | 0,7781 | 4,005E-07  |
| TcCLB.511771.10  | retrotransposon hot spot protein (RHS, pseudogene), putative  | 0,7779 | 1,481E-10  |
| TcCLB.507849.70  | hypothetical protein                                          | 0,7778 | 1,235E-16  |
| TcCLB.510679.30  | metal-ion transporter, putative                               | 0,7778 | 6,219E-12  |
| TcCLB.427247.10  | serine/threonine protein kinase, putative                     | 0,7778 | 0,02329    |
| TcCLB.506671.10  | mucin-associated surface protein (MASP), putative             | 0,7778 | 0,0597     |
| TcCLB.506421.10  | retrotransposon hot spot (RHS) protein, putative              | 0,7776 | 2,867E-18  |
| TcCLB.510375.10  | mucin-associated surface protein (MASP), putative             | 0,7776 | 0,207      |
| TcCLB.506695.40  | hypothetical protein, conserved                               | 0,7775 | 5,542E-06  |
| TcCLB.511877.10  | surface antigen TASV-B2 (TASV-B2)                             | 0,7773 | 0,0004472  |
| TcCLB.506035.4   | trans-sialidase, putative (fragment)                          | 0,7773 | 0,002561   |
| TcCLB.509233.60  | hypothetical protein, conserved                               | 0,7771 | 1,603E-12  |
| TcCLB.508041.10  | SKP1-like protein                                             | 0,7769 | 0,00554    |
| TcCLB.509551.20  | Putrescine-cadaverine transporter 1, putative (POT1.2)        | 0,7766 | 8,422E-12  |
| TcCLB.504423.20  | electron transport protein SCO1/SCO2, putative                | 0,7765 | 1,15E-11   |
| TcCLB.503925.3   | hypothetical protein, conserved                               | 0,7764 | 0,00007053 |
| TcCLB.510571.39  | actin 2, putative (fragment)                                  | 0,7762 | 2,475E-07  |
| TcCLB.413133.10  | mucin TcMUCII (pseudogene), putative                          | 0,7762 | 0,05679    |
| TcCLB.509157.80  | DnaJ homolog, putative                                        | 0,7759 | 9,873E-07  |
| TcCLB.511321.40  | hypothetical protein, conserved                               | 0,7757 | 3,447E-10  |
| TcCLB.511393.88  | hypothetical protein, conserved (fragment)                    | 0,7755 | 3,297E-10  |
| TcCLB.507547.9   | mucin TcMUCI, putative                                        | 0,7753 | 0,0001531  |
| TcCLB.509933.20  | hypothetical protein, conserved                               | 0,7746 | 6,053E-08  |
| TcCLB.509231.10  | cytochrome P450, putative                                     | 0,7745 | 4,449E-13  |
| TcCLB.461515.10  | mucin TcMUCI, putative (fragment)                             | 0,7742 | 1,528E-09  |
| TcCLB.511655.60  | hypothetical protein, conserved                               | 0,7735 | 0,0007979  |
| TcCLB.511395.90  | serine/threonine protein kinase, putative                     | 0,7732 | 1,594E-09  |
| TcCLB.508157.50  | trans-sialidase, putative                                     | 0,7732 | 0,0005791  |
| TcCLB.510275.50  | mucin TcMUCII, putative                                       | 0,7729 | 0,128      |
| TcCLB.510349.90  | Lys-63-specific deubiquitinase BRCC36, putative               | 0,7724 | 8,286E-08  |
| TcCLB.506559.30  | hypothetical protein, conserved                               | 0,7724 | 3,624E-07  |
| TcCLB.509029.140 | hypothetical protein, conserved                               | 0,7723 | 5,077E-09  |
| TcCLB.507221.30  | hypothetical protein, conserved                               | 0,7723 | 0,00003168 |
| TcCLB.422921.10  | hypothetical protein, conserved                               | 0,7722 | 0,0003959  |
| TcCLB.510047.100 | mucin-associated surface protein (MASP, pseudogene), putative | 0,7722 | 0,02949    |
| TcCLB.510303.140 | surface protease GP63, putative                               | 0,772  | 3,164E-12  |
| TcCLB.422867.10  | trans-sialidase, Group II, putative                           | 0,772  | 0,007265   |
| TcCLB.510101.200 | zinc finger cchc and cchc domain-containing protein           | 0,7719 | 1,753E-12  |
| TcCLB.507095.10  | hypothetical protein (fragment)                               | 0,7719 | 0,005398   |



|                  |                                                                  |        |            |
|------------------|------------------------------------------------------------------|--------|------------|
| TcCLB.508665.14  | heat shock protein, putative                                     | 0,7716 | 1,518E-17  |
| TcCLB.510963.50  | 6-phosphofructo-2-kinase/fructose-2,6-bisphosphatas, putative    | 0,7716 | 3,555E-09  |
| TcCLB.508895.40  | hypothetical protein, conserved                                  | 0,7713 | 4,904E-08  |
| TcCLB.509227.10  | mucin TcMUCI, putative                                           | 0,7712 | 0,02109    |
| TcCLB.507957.50  | mucin TcMUCII, putative                                          | 0,7708 | 0,1035     |
| TcCLB.510791.60  | mucin-associated surface protein (MASP, pseudogene), putative    | 0,7707 | 0,001864   |
| TcCLB.503423.5   | retrotransposon hot spot (RHS) protein, putative (fragment)      | 0,7707 | 0,1487     |
| TcCLB.509753.110 | mucin TcMUCII, putative                                          | 0,7707 | 0,2974     |
| TcCLB.506713.70  | retrotransposon hot spot protein (RHS, pseudogene), putative     | 0,77   | 2,299E-08  |
| TcCLB.510661.129 | hypothetical protein, conserved                                  | 0,7692 | 2,167E-06  |
| TcCLB.510345.30  | hypothetical protein                                             | 0,7692 | 0,001523   |
| TcCLB.508023.120 | hypothetical protein, conserved (pseudogene)                     | 0,7691 | 1,263E-13  |
| TcCLB.507229.29  | dispersed gene family protein 1 (DGF-1), putative                | 0,7691 | 0,09847    |
| TcCLB.504249.111 | mucin-associated surface protein (MASP), putative                | 0,769  | 0,07296    |
| TcCLB.508503.70  | hypothetical protein, conserved                                  | 0,7689 | 1,708E-08  |
| TcCLB.506191.20  | retrotransposon hot spot protein (RHS, pseudogene), putative     | 0,7684 | 0,0000296  |
| TcCLB.510155.190 | hypothetical protein, conserved                                  | 0,7682 | 5,85E-10   |
| TcCLB.511693.90  | electron-transfer-flavoprotein, alpha polypeptide, putative      | 0,7681 | 4,018E-14  |
| TcCLB.506535.10  | retrotransposon hot spot (RHS) protein, putative (fragment)      | 0,7679 | 5,599E-06  |
| TcCLB.485335.10  | retrotransposon hot spot protein (RHS, pseudogene), putative     | 0,7676 | 0,0002157  |
| TcCLB.505163.50  | hypothetical protein                                             | 0,7676 | 0,09389    |
| TcCLB.511767.30  | retrotransposon hot spot protein (RHS, pseudogene), putative     | 0,7671 | 1,287E-09  |
| TcCLB.509897.250 | retrotransposon hot spot protein (RHS, pseudogene), putative     | 0,766  | 5,917E-06  |
| TcCLB.506743.110 | protein tyrosine phosphatase, putative                           | 0,7658 | 0,00004093 |
| TcCLB.508047.80  | mucin TcMUCII (pseudogene), putative                             | 0,7658 | 0,08104    |
| TcCLB.507253.70  | N-acetyltransferase complex ARD1 subunit (pseudogene), putative  | 0,7658 | 0,2271     |
| TcCLB.508547.201 | ubiquitin-protein ligase, putative (fragment)                    | 0,7653 | 0,009148   |
| TcCLB.511401.40  | mucin-associated surface protein (MASP, pseudogene), putative    | 0,7653 | 0,0198     |
| TcCLB.508869.59  | mucin-associated surface protein (MASP), putative                | 0,7649 | 0,2705     |
| TcCLB.511577.120 | hypothetical protein, conserved                                  | 0,7645 | 2,335E-06  |
| TcCLB.508383.10  | Present in the outer mitochondrial membrane proteome 3           | 0,7643 | 0,0001649  |
| TcCLB.506525.162 | hypothetical protein, conserved                                  | 0,7641 | 0,002312   |
| TcCLB.508563.20  | trans-sialidase, Group II, putative                              | 0,764  | 0,003241   |
| TcCLB.509099.140 | hypothetical protein, conserved                                  | 0,7638 | 0,00001439 |
| TcCLB.509337.15  | hypothetical protein, conserved                                  | 0,7633 | 3,313E-12  |
| TcCLB.503681.20  | ethanolamine phosphotransferase, putative                        | 0,7632 | 5,14E-08   |
| TcCLB.511823.79  | hypothetical protein, conserved                                  | 0,7632 | 2,514E-06  |
| TcCLB.508707.310 | leucine rich repeat protein, putative                            | 0,7631 | 8,85E-20   |
| TcCLB.508277.220 | hypothetical protein                                             | 0,7626 | 4,848E-22  |
| TcCLB.511153.60  | palmitoyl acyltransferase 9, putative                            | 0,7626 | 1,458E-06  |
| TcCLB.510155.170 | hypothetical protein, conserved                                  | 0,7626 | 0,00008586 |
| TcCLB.506683.140 | beta galactofuranosyl glycosyltransferase (pseudogene), putative | 0,7621 | 1,338E-06  |
| TcCLB.508193.45  | trans-sialidase (pseudogene), putative                           | 0,762  | 0,0003607  |
| TcCLB.506265.130 | hypothetical protein, conserved                                  | 0,7619 | 1,217E-10  |
| TcCLB.509149.70  | hypothetical protein, conserved                                  | 0,7618 | 4,529E-10  |

|                  |                                                            |        |            |
|------------------|------------------------------------------------------------|--------|------------|
| TcCLB.510755.65  | hypothetical protein                                       | 0,7618 | 0,0003807  |
| TcCLB.511523.70  | Present in the outer mitochondrial membrane proteome 3:    | 0,7617 | 0,0002506  |
| TcCLB.509769.63  | Ran-binding protein, putative                              | 0,7616 | 2,876E-07  |
| TcCLB.511389.120 | hypothetical protein, conserved                            | 0,7613 | 3,134E-07  |
| TcCLB.505193.20  | hypothetical protein, conserved                            | 0,7613 | 0,00000232 |
| TcCLB.508503.100 | hypothetical protein, conserved                            | 0,7613 | 0,000314   |
| TcCLB.507907.10  | trans-sialidase, putative                                  | 0,7613 | 0,2747     |
| TcCLB.508315.5   | mucin TcMUCII, putative (fragment)                         | 0,7612 | 0,2039     |
| TcCLB.507317.40  | hypothetical protein, conserved                            | 0,7611 | 8,188E-09  |
| TcCLB.504183.20  | trans-sialidase, Group II, putative                        | 0,7608 | 0,0002671  |
| TcCLB.511155.10  | hypothetical protein, conserved (pseudogene)               | 0,7601 | 0,00003476 |
| TcCLB.507667.20  | hypothetical protein, conserved                            | 0,7599 | 1,999E-19  |
| TcCLB.503633.11  | mucin-associated surface protein (MASP), putative (fragm   | 0,7591 | 0,1636     |
| TcCLB.508913.10  | trans-sialidase (pseudogene), putative                     | 0,7589 | 0,00006618 |
| TcCLB.508239.20  | hypothetical protein, conserved                            | 0,7588 | 1,028E-16  |
| TcCLB.511361.30  | hypothetical protein, conserved                            | 0,7586 | 0,0004498  |
| TcCLB.510713.90  | trans-sialidase, Group V, putative                         | 0,7585 | 0,001162   |
| TcCLB.506443.100 | trans-sialidase, Group IV, putative                        | 0,7583 | 0,00007806 |
| TcCLB.504233.70  | mucin TcMUCI, putative                                     | 0,7583 | 0,2746     |
| TcCLB.506633.80  | hypothetical protein, conserved                            | 0,758  | 4,681E-12  |
| TcCLB.510529.30  | hypothetical protein, conserved                            | 0,7574 | 8,051E-16  |
| TcCLB.511283.140 | hypothetical protein, conserved                            | 0,7569 | 1,867E-14  |
| TcCLB.510323.40  | heat shock protein 20, putative                            | 0,7568 | 7,977E-10  |
| TcCLB.506777.100 | hypothetical protein, conserved                            | 0,7567 | 0,00009773 |
| TcCLB.508741.20  | hypothetical protein, conserved                            | 0,7565 | 4,919E-07  |
| TcCLB.507691.50  | retrotransposon hot spot (RHS) protein, putative           | 0,7565 | 6,56E-07   |
| TcCLB.506199.10  | hypothetical protein, conserved                            | 0,7565 | 0,0001064  |
| TcCLB.508677.120 | hypothetical protein, conserved                            | 0,7564 | 0,0005863  |
| TcCLB.511077.130 | mucin TcMUCII, putative                                    | 0,7563 | 0,2002     |
| TcCLB.508881.50  | hypothetical protein, conserved                            | 0,756  | 0,00000111 |
| TcCLB.509115.60  | mucin-like glycoprotein, putative                          | 0,7559 | 0,03813    |
| TcCLB.509179.130 | hypothetical protein, conserved                            | 0,7558 | 3,913E-07  |
| TcCLB.506821.20  | ATP-dependent Clp protease subunit, heat shock protein 10  | 0,7557 | 8,493E-18  |
| TcCLB.511807.140 | hypothetical protein, conserved                            | 0,7555 | 3,926E-12  |
| TcCLB.507993.60  | hypothetical protein, conserved                            | 0,7555 | 1,873E-06  |
| TcCLB.509087.10  | retrotransposon hot spot protein (RHS, pseudogene), putat  | 0,7555 | 0,008832   |
| TcCLB.506767.280 | retrotransposon hot spot protein (RHS, pseudogene), putat  | 0,7555 | 0,2274     |
| TcCLB.508163.20  | mucin TcMUCII, putative                                    | 0,7555 | 0,2917     |
| TcCLB.508165.100 | mucin TcMUCII, putative                                    | 0,7554 | 0,1509     |
| TcCLB.511067.30  | transketolase, putative                                    | 0,7546 | 2,22E-17   |
| TcCLB.507893.9   | dispersed gene family protein 1 (DGF-1), putative (fragme  | 0,7542 | 0,008161   |
| TcCLB.511739.10  | hypothetical protein, conserved                            | 0,7541 | 3,813E-07  |
| TcCLB.510361.200 | mucin TcMUCII, putative                                    | 0,7539 | 0,2907     |
| TcCLB.507035.80  | trans-sialidase (pseudogene), putative                     | 0,7538 | 1,201E-07  |
| TcCLB.507853.20  | dynein beta chain, flagellar outer arm (pseudogene), putat | 0,7538 | 0,00002709 |

|                  |                                                           |        |            |
|------------------|-----------------------------------------------------------|--------|------------|
| TcCLB.511807.120 | hypothetical protein, conserved                           | 0,7537 | 5,112E-11  |
| TcCLB.508461.10  | Present in the outer mitochondrial membrane proteome 6    | 0,7537 | 2,652E-08  |
| TcCLB.511367.70  | dihydrolipoamide acetyltransferase, putative              | 0,7536 | 4,153E-10  |
| TcCLB.509141.20  | hypothetical protein                                      | 0,7533 | 0,00003979 |
| TcCLB.503665.10  | trans-sialidase (pseudogene), putative                    | 0,7533 | 0,1088     |
| TcCLB.510417.40  | mucin-associated surface protein (MASP), putative (fragm  | 0,753  | 0,4055     |
| TcCLB.507587.24  | dispersed gene family protein 1 (DGF-1), putative (fragme | 0,7528 | 0,00001221 |
| TcCLB.508389.114 | mucin TcMUCII, putative                                   | 0,7526 | 0,284      |
| TcCLB.509005.10  | axoneme central apparatus protein (fragment) (PF16)       | 0,7521 | 0,0001465  |
| TcCLB.511855.10  | trans-sialidase, putative                                 | 0,752  | 0,002364   |
| TcCLB.509791.180 | hypothetical protein, conserved                           | 0,7518 | 1,81E-07   |
| TcCLB.508119.160 | hypothetical protein, conserved                           | 0,7515 | 2,78E-08   |
| TcCLB.510985.20  | retrotransposon hot spot protein (RHS, pseudogene), putat | 0,7512 | 6,326E-12  |
| TcCLB.506401.360 | hypothetical protein, conserved                           | 0,7509 | 0,0007878  |
| TcCLB.506481.30  | hypothetical protein, conserved                           | 0,7503 | 2,41E-08   |
| TcCLB.504025.10  | hypothetical protein, conserved                           | 0,7496 | 0,0006968  |
| TcCLB.506845.40  | hypothetical protein, conserved (pseudogene)              | 0,7496 | 0,000834   |
| TcCLB.509725.60  | glycine dehydrogenase [decarboxylating] (pseudogene), pu  | 0,7495 | 8,976E-07  |
| TcCLB.508153.560 | hypothetical protein, conserved                           | 0,7495 | 0,00001711 |
| TcCLB.508641.200 | hypothetical protein, conserved                           | 0,7494 | 9,164E-09  |
| TcCLB.509871.80  | dispersed gene family protein 1 (DGF-1), putative         | 0,7494 | 0,00001244 |
| TcCLB.508293.160 | trans-sialidase (pseudogene), putative                    | 0,749  | 0,3473     |
| TcCLB.510565.130 | hypothetical protein                                      | 0,7486 | 2,134E-08  |
| TcCLB.509633.60  | serine/threonine-protein phosphatase PP1, putative        | 0,7486 | 0,001401   |
| TcCLB.508173.47  | autophagy-related protein 8 (ATG8)                        | 0,7485 | 8,787E-09  |
| TcCLB.420293.31  | hypothetical protein                                      | 0,7485 | 0,05332    |
| TcCLB.506001.40  | trans-sialidase, Group V, putative                        | 0,748  | 0,01345    |
| TcCLB.507065.108 | mucin-associated surface protein (MASP, pseudogene), pu   | 0,7479 | 0,1014     |
| TcCLB.508237.9   | protein kinase, putative                                  | 0,7477 | 0,0005104  |
| TcCLB.506285.40  | mucin-associated surface protein (MASP, pseudogene), pu   | 0,7477 | 0,01734    |
| TcCLB.511231.34  | hypothetical protein, conserved                           | 0,7476 | 5,815E-07  |
| TcCLB.506133.68  | mucin TcMUCII (pseudogene), putative                      | 0,7476 | 0,1729     |
| TcCLB.510155.20  | KREL1                                                     | 0,7474 | 8,442E-12  |
| TcCLB.507559.100 | hypothetical protein, conserved                           | 0,7473 | 1,735E-18  |
| TcCLB.504017.54  | hypothetical protein, conserved                           | 0,7473 | 3,105E-08  |
| TcCLB.508331.30  | Checkpoint protein HUS1, putative                         | 0,7473 | 0,00001771 |
| TcCLB.503447.20  | trans-sialidase, Group II, putative                       | 0,7472 | 0,008435   |
| TcCLB.508873.420 | Present in the outer mitochondrial membrane proteome 11   | 0,747  | 1,169E-11  |
| TcCLB.509109.30  | hypothetical protein, conserved                           | 0,7457 | 5,163E-06  |
| TcCLB.504039.240 | mucin TcMUCII, putative                                   | 0,7457 | 0,2055     |
| TcCLB.506657.40  | ADP/ATP translocase, putative                             | 0,7456 | 4,841E-11  |
| TcCLB.508501.270 | hypothetical protein, conserved                           | 0,7456 | 4,443E-09  |
| TcCLB.410589.10  | AMP deaminase, putative                                   | 0,7454 | 0,0000948  |
| TcCLB.508959.4   | cytochrome c, putative                                    | 0,7453 | 1,596E-09  |
| TcCLB.511105.29  | dispersed gene family protein 1 (DGF-1), putative         | 0,7452 | 0,004116   |

|                  |                                                           |        |            |
|------------------|-----------------------------------------------------------|--------|------------|
| TcCLB.510497.50  | mucin-associated surface protein (MASP), putative         | 0,7452 | 0,04428    |
| TcCLB.507699.37  | mucin-associated surface protein (MASP, pseudogene), pu   | 0,745  | 0,174      |
| TcCLB.510061.20  | hypothetical protein                                      | 0,745  | 0,4744     |
| TcCLB.506053.5   | amino acid transporter, putative (fragment)               | 0,7443 | 1,132E-09  |
| TcCLB.506169.10  | glycine dehydrogenase [decarboxylating] (pseudogene), pu  | 0,7443 | 0,009441   |
| TcCLB.508775.40  | trans-sialidase (pseudogene), putative                    | 0,7443 | 0,02046    |
| TcCLB.510791.11  | hypothetical protein                                      | 0,7441 | 0,007788   |
| TcCLB.503715.10  | splicing factor TSR1, putative                            | 0,7438 | 6,167E-14  |
| TcCLB.507847.10  | mucin TcMUCII (pseudogene), putative                      | 0,7438 | 0,00514    |
| TcCLB.508983.20  | trans-sialidase (pseudogene), putative                    | 0,7437 | 0,00425    |
| TcCLB.507049.190 | hypothetical protein, conserved                           | 0,7435 | 1,789E-12  |
| TcCLB.510349.70  | hypothetical protein, conserved                           | 0,7434 | 0,0001002  |
| TcCLB.507849.60  | hypothetical protein, conserved                           | 0,7432 | 1,188E-11  |
| TcCLB.506301.50  | succinyl-coA:3-ketoacid-coenzyme A transferase, mitochor  | 0,7429 | 1,476E-11  |
| TcCLB.507835.60  | retrotransposon hot spot protein (RHS, pseudogene), putat | 0,7429 | 0,00009351 |
| TcCLB.507953.200 | 90 kDa surface protein, putative                          | 0,7429 | 0,06601    |
| TcCLB.506735.80  | hypothetical protein, conserved                           | 0,7422 | 1,442E-10  |
| TcCLB.511257.70  | surface protease GP63, putative                           | 0,7422 | 0,00001088 |
| TcCLB.508569.70  | hypothetical protein, conserved                           | 0,7421 | 1,457E-13  |
| TcCLB.510039.100 | hypothetical protein, conserved                           | 0,7419 | 0,0002144  |
| TcCLB.509067.70  | pyrroline-5-carboxylate synthetase-like protein, putative | 0,7418 | 3,459E-13  |
| TcCLB.508241.40  | hypothetical protein                                      | 0,7417 | 1,709E-09  |
| TcCLB.508325.60  | retrotransposon hot spot (RHS) protein, putative          | 0,7417 | 1,539E-06  |
| TcCLB.510625.109 | mucin-associated surface protein (MASP), putative         | 0,7417 | 0,4717     |
| TcCLB.510577.30  | hypothetical protein                                      | 0,7415 | 1,445E-08  |
| TcCLB.511349.110 | retrotransposon hot spot protein (RHS, pseudogene), putat | 0,7415 | 0,0316     |
| TcCLB.510181.100 | acid phosphatase, putative (AP)                           | 0,7414 | 0,00005399 |
| TcCLB.510175.125 | hypothetical protein                                      | 0,7414 | 0,00393    |
| TcCLB.507015.50  | retrotransposon hot spot protein (RHS, pseudogene), putat | 0,7408 | 2,484E-06  |
| TcCLB.506259.30  | retrotransposon hot spot protein (RHS, pseudogene), putat | 0,7407 | 2,586E-08  |
| TcCLB.508015.30  | hypothetical protein                                      | 0,7407 | 0,004669   |
| TcCLB.509445.39  | glutamate dehydrogenase, putative                         | 0,7405 | 4,098E-14  |
| TcCLB.506773.120 | mRNA cap guanine-N7 methyltransferase, putative           | 0,7405 | 9,264E-10  |
| TcCLB.508027.120 | hypothetical protein, conserved                           | 0,7403 | 1,371E-09  |
| TcCLB.421555.9   | mucin-associated surface protein (MASP), putative         | 0,7403 | 0,0004173  |
| TcCLB.504427.40  | hypothetical protein, conserved                           | 0,74   | 0,0001091  |
| TcCLB.508041.30  | 40S ribosomal protein S15A, putative                      | 0,7398 | 3,241E-25  |
| TcCLB.503649.20  | mucin TcMUC, putative                                     | 0,7397 | 0,4132     |
| TcCLB.509533.30  | retrotransposon hot spot protein (RHS, pseudogene), putat | 0,7396 | 2,959E-06  |
| TcCLB.511589.180 | hypothetical protein, conserved                           | 0,7395 | 5,366E-08  |
| TcCLB.510861.60  | hypothetical protein, conserved                           | 0,7394 | 7,596E-15  |
| TcCLB.505763.19  | P-type H -ATPase, putative                                | 0,7393 | 4,299E-25  |
| TcCLB.510717.20  | surface antigen TASV, putative                            | 0,7392 | 4,321E-10  |
| TcCLB.503565.29  | hypothetical protein, conserved                           | 0,7392 | 8,883E-09  |
| TcCLB.504425.100 | hypothetical protein, conserved                           | 0,7386 | 0,00001896 |

|                  |                                                             |        |            |
|------------------|-------------------------------------------------------------|--------|------------|
| TcCLB.510613.20  | kinesin, putative                                           | 0,7385 | 8,011E-09  |
| TcCLB.504239.410 | mucin TcMUCII, putative                                     | 0,7385 | 0,1393     |
| TcCLB.509105.4   | Generative cell specific 1 protein, putative (GCS1)         | 0,7384 | 0,00001733 |
| TcCLB.506777.20  | cytoplasmic translation machinery associated protein, puta  | 0,7381 | 4,705E-08  |
| TcCLB.509753.250 | mucin-associated surface protein (MASP), putative           | 0,7381 | 0,07536    |
| TcCLB.511613.60  | mucin-associated surface protein (MASP), putative           | 0,738  | 0,0163     |
| TcCLB.503821.19  | hypothetical protein, conserved                             | 0,7379 | 1,364E-06  |
| TcCLB.511529.210 | hypothetical protein, conserved                             | 0,7375 | 0,00000149 |
| TcCLB.510285.74  | hypothetical protein, conserved                             | 0,7375 | 0,0001048  |
| TcCLB.509549.90  | alpha-adaptin-like (pseudogene), putative                   | 0,7371 | 2,072E-17  |
| TcCLB.507047.130 | hypothetical protein, conserved                             | 0,7371 | 6,536E-07  |
| TcCLB.505919.20  | trans-sialidase, Group II, putative                         | 0,7371 | 0,0002524  |
| TcCLB.510275.60  | mucin-associated surface protein (MASP), putative           | 0,7371 | 0,117      |
| TcCLB.505193.60  | hypothetical protein, conserved                             | 0,737  | 0,00000926 |
| TcCLB.507317.20  | hypothetical protein                                        | 0,737  | 0,00001401 |
| TcCLB.511871.170 | trans-sialidase (pseudogene), putative                      | 0,737  | 0,001214   |
| TcCLB.511121.11  | retrotransposon hot spot (RHS) protein, putative (fragment) | 0,7367 | 0,0004474  |
| TcCLB.508165.30  | mucin-associated surface protein (MASP), putative           | 0,7367 | 0,124      |
| TcCLB.508587.50  | hypothetical protein                                        | 0,7366 | 0,1024     |
| TcCLB.507669.104 | transcription elongation factor, putative                   | 0,7363 | 9,097E-07  |
| TcCLB.507253.30  | hypothetical protein, conserved (pseudogene)                | 0,7361 | 0,0001519  |
| TcCLB.509775.9   | protein kinase, putative (fragment)                         | 0,7359 | 0,001069   |
| TcCLB.506331.80  | beta galactofuranosyl glycosyltransferase (pseudogene), p   | 0,7357 | 0,06138    |
| TcCLB.509549.100 | hypothetical protein, conserved                             | 0,7352 | 4,212E-14  |
| TcCLB.510791.30  | mucin-associated surface protein (MASP, pseudogene), pu     | 0,7352 | 1,345E-07  |
| TcCLB.503559.70  | cystinosin, putative                                        | 0,7351 | 0,000321   |
| TcCLB.510155.80  | mitochondrial-processing peptidase subunit beta, putative   | 0,7348 | 1,744E-14  |
| TcCLB.507981.61  | hypothetical protein                                        | 0,7347 | 0,1069     |
| TcCLB.506855.20  | hypothetical protein, conserved                             | 0,7346 | 9,607E-07  |
| TcCLB.510947.44  | hypothetical protein, conserved                             | 0,7346 | 0,00005987 |
| TcCLB.510887.70  | hypothetical protein, conserved                             | 0,7344 | 2,492E-07  |
| TcCLB.460625.9   | trans-sialidase (pseudogene), putative                      | 0,734  | 0,2377     |
| TcCLB.506529.80  | hypothetical protein, conserved                             | 0,7339 | 1,224E-15  |
| TcCLB.506671.50  | trans-sialidase (pseudogene), putative                      | 0,7338 | 0,02537    |
| TcCLB.506759.20  | mucin-associated surface protein (MASP), putative           | 0,7338 | 0,119      |
| TcCLB.507615.60  | hypothetical protein, conserved                             | 0,7337 | 1,086E-06  |
| TcCLB.510241.100 | hypothetical protein, conserved                             | 0,7335 | 9,061E-06  |
| TcCLB.508543.60  | hypothetical protein, conserved                             | 0,7329 | 7,492E-08  |
| TcCLB.509331.40  | hypothetical protein, conserved                             | 0,7326 | 0,00002729 |
| TcCLB.510461.20  | trans-sialidase (pseudogene), putative                      | 0,7325 | 0,2837     |
| TcCLB.506401.230 | hypothetical protein, conserved                             | 0,7324 | 2,313E-14  |
| TcCLB.508285.40  | retrotransposon hot spot protein (RHS, pseudogene), putat   | 0,7319 | 0,07978    |
| TcCLB.511817.230 | hypothetical protein, conserved                             | 0,7318 | 8,091E-14  |
| TcCLB.507213.60  | retrotransposon hot spot protein (RHS, pseudogene), putat   | 0,7318 | 5,498E-06  |
| TcCLB.503839.39  | hypothetical protein, conserved                             | 0,7317 | 0,0002883  |

|                  |                                                                 |        |            |
|------------------|-----------------------------------------------------------------|--------|------------|
| TcCLB.431889.10  | hypothetical protein, conserved (fragment)                      | 0,7315 | 0,1545     |
| TcCLB.506697.20  | cyclic nucleotide phosphodiesterase                             | 0,7311 | 0,00002305 |
| TcCLB.508173.100 | Monoxygenase, putative                                          | 0,7308 | 1,502E-11  |
| TcCLB.510947.10  | GDP-mannose pyrophosphorylase                                   | 0,7307 | 1,63E-11   |
| TcCLB.509765.30  | retrotransposon hot spot protein (RHS, pseudogene), putative    | 0,7307 | 0,0002706  |
| TcCLB.509207.50  | hypothetical protein, conserved                                 | 0,7304 | 2,652E-15  |
| TcCLB.504797.34  | N-acetyltransferase, putative                                   | 0,7301 | 1,104E-14  |
| TcCLB.510205.50  | mucin-associated surface protein (MASP), putative               | 0,73   | 0,273      |
| TcCLB.505193.40  | SUMO1/Ulp2, putative                                            | 0,7297 | 4,52E-10   |
| TcCLB.508621.30  | choline/carnitine O-acyltransferase (pseudogene), putative      | 0,7295 | 3,837E-12  |
| TcCLB.507499.56  | N-acetyltransferase complex ARD1 subunit (pseudogene), putative | 0,7293 | 0,2115     |
| TcCLB.506349.53  | retrotransposon hot spot protein (RHS, pseudogene), putative    | 0,7291 | 2,647E-13  |
| TcCLB.506529.314 | hypothetical protein, conserved                                 | 0,7286 | 0,001702   |
| TcCLB.506269.70  | mucin TcMUCII, putative                                         | 0,7285 | 0,1507     |
| TcCLB.508509.30  | surface protease GP63 (pseudogene), putative                    | 0,7283 | 0,09405    |
| TcCLB.508539.110 | mucin-associated surface protein (MASP), putative               | 0,7281 | 0,07766    |
| TcCLB.506399.10  | sigma-adaptin 3, putative                                       | 0,7281 | 0,1485     |
| TcCLB.503505.14  | PTP1-interacting protein, 39 kDa, putative                      | 0,7279 | 0,00003561 |
| TcCLB.509601.30  | hypothetical protein                                            | 0,7277 | 1,083E-07  |
| TcCLB.509943.20  | cAMP specific phosphodiesterase, putative                       | 0,7277 | 9,072E-07  |
| TcCLB.510359.610 | trans-sialidase, Group II, putative                             | 0,7277 | 0,03096    |
| TcCLB.506743.69  | hypothetical protein, conserved                                 | 0,7275 | 0,0004615  |
| TcCLB.434931.10  | paraxonemal rod protein PAR2, putative                          | 0,7273 | 5,494E-11  |
| TcCLB.510243.10  | hypothetical protein, conserved                                 | 0,7273 | 0,000058   |
| TcCLB.508205.39  | dynein light chain, putative                                    | 0,7271 | 9,112E-06  |
| TcCLB.510889.130 | hypothetical protein                                            | 0,7266 | 0,008811   |
| TcCLB.510503.160 | mucin TcMUCII, putative                                         | 0,7265 | 0,02403    |
| TcCLB.506485.80  | oxidoreductase, putative                                        | 0,7264 | 1,726E-12  |
| TcCLB.507957.140 | trans-sialidase (pseudogene), putative                          | 0,7263 | 0,002225   |
| TcCLB.510715.90  | trans-sialidase, Group V, putative                              | 0,7259 | 0,0575     |
| TcCLB.510853.96  | trans-sialidase (pseudogene), putative                          | 0,7258 | 1,249E-07  |
| TcCLB.509611.150 | hypothetical protein, conserved                                 | 0,7254 | 1,411E-08  |
| TcCLB.506847.30  | retrotransposon hot spot protein (RHS, pseudogene), putative    | 0,7254 | 3,639E-06  |
| TcCLB.509979.100 | hypothetical protein, conserved                                 | 0,7254 | 0,00001111 |
| TcCLB.510403.30  | trans-sialidase, Group II, putative                             | 0,7251 | 0,08349    |
| TcCLB.508601.20  | hypothetical protein, conserved                                 | 0,7249 | 6,457E-08  |
| TcCLB.510153.5   | hypothetical protein, conserved                                 | 0,7244 | 0,05593    |
| TcCLB.507875.159 | 60S acidic ribosomal protein P2 (pseudogene), putative          | 0,7241 | 3,309E-13  |
| TcCLB.507663.80  | hypothetical protein, conserved                                 | 0,724  | 8,031E-08  |
| TcCLB.511571.10  | ATP-dependent DEAD/H RNA helicase, putative                     | 0,7239 | 0,01308    |
| TcCLB.511491.9   | hypothetical protein, conserved                                 | 0,7237 | 0,001179   |
| TcCLB.510381.40  | hypothetical protein, conserved                                 | 0,7236 | 6,739E-10  |
| TcCLB.509571.40  | hypothetical protein, conserved                                 | 0,7236 | 5,766E-09  |
| TcCLB.509153.139 | hypothetical protein, conserved                                 | 0,7235 | 8,41E-10   |
| TcCLB.511385.100 | hypothetical protein, conserved                                 | 0,7235 | 2,492E-08  |

|                  |                                                            |        |            |
|------------------|------------------------------------------------------------|--------|------------|
| TcCLB.511255.370 | mucin TcMUCII, putative                                    | 0,7233 | 0,2592     |
| TcCLB.511825.80  | I/6 autoantigen, putative                                  | 0,7232 | 2,958E-10  |
| TcCLB.511509.40  | hypothetical protein, conserved                            | 0,7232 | 0,0007347  |
| TcCLB.503697.140 | hypothetical protein                                       | 0,7231 | 0,0002096  |
| TcCLB.508207.160 | hypothetical protein, conserved                            | 0,7229 | 0,0001027  |
| TcCLB.506065.10  | retrotransposon hot spot protein (RHS, pseudogene), putat  | 0,7229 | 0,03568    |
| TcCLB.510197.10  | trans-sialidase (pseudogene), putative                     | 0,7226 | 0,00004005 |
| TcCLB.506457.4   | hypothetical protein, conserved                            | 0,7226 | 0,07659    |
| TcCLB.509897.80  | mucin-associated surface protein (MASP, pseudogene), pu    | 0,7221 | 0,1879     |
| TcCLB.503925.60  | hypothetical protein                                       | 0,722  | 2,43E-08   |
| TcCLB.506499.105 | mucin-associated surface protein (MASP, pseudogene), pu    | 0,7219 | 0,1619     |
| TcCLB.508325.160 | retrotransposon hot spot (RHS) protein, putative           | 0,7218 | 4,836E-14  |
| TcCLB.503889.20  | mucin TcMUC (pseudogene), putative                         | 0,7218 | 0,0001424  |
| TcCLB.503979.20  | hypothetical protein, conserved                            | 0,7217 | 3,751E-06  |
| TcCLB.506601.51  | mucin TcMUCII (pseudogene), putative                       | 0,7216 | 0,2003     |
| TcCLB.508575.20  | hypothetical protein                                       | 0,7214 | 0,1376     |
| TcCLB.511417.80  | phosphate-repressible phosphate permease, putative         | 0,7211 | 1,924E-11  |
| TcCLB.510989.69  | hypothetical protein, conserved                            | 0,7211 | 0,00728    |
| TcCLB.503587.47  | hypothetical protein                                       | 0,7211 | 0,1165     |
| TcCLB.507471.31  | elongation factor 1-gamma (EF-1-gamma, pseudogene), p      | 0,7204 | 0,429      |
| TcCLB.504115.10  | trans-sialidase, Group VIII, putative                      | 0,7203 | 1,161E-06  |
| TcCLB.504035.41  | mucin-associated surface protein (MASP, pseudogene), pu    | 0,7202 | 0,6909     |
| TcCLB.510235.6   | hypothetical protein                                       | 0,72   | 0,05927    |
| TcCLB.506345.100 | beta galactofuranosyl glycosyltransferase (pseudogene), pi | 0,7198 | 0,00007082 |
| TcCLB.506493.90  | cysteine peptidase, Clan CA, family C2, putative           | 0,7197 | 1,598E-13  |
| TcCLB.510565.160 | hypothetical protein, conserved                            | 0,7196 | 0,00007051 |
| TcCLB.511225.20  | retrotransposon hot spot protein (RHS, pseudogene), putat  | 0,7195 | 4,824E-12  |
| TcCLB.503905.10  | myosin heavy chain, putative                               | 0,7195 | 8,345E-09  |
| TcCLB.508207.120 | hypothetical protein, conserved                            | 0,7195 | 0,006869   |
| TcCLB.509855.10  | hypothetical protein, conserved                            | 0,7194 | 3,039E-13  |
| TcCLB.510713.170 | mucin-associated surface protein (MASP), putative          | 0,7193 | 0,1584     |
| TcCLB.504427.270 | hypothetical protein, conserved                            | 0,7192 | 1,723E-08  |
| TcCLB.509033.20  | beta galactofuranosyl glycosyltransferase, putative        | 0,7186 | 0,0001018  |
| TcCLB.503955.50  | hypothetical protein, conserved                            | 0,7185 | 3,586E-07  |
| TcCLB.511349.80  | retrotransposon hot spot protein (RHS, pseudogene), putat  | 0,7185 | 0,2688     |
| TcCLB.511923.80  | mucin-associated surface protein (MASP, pseudogene), pu    | 0,7182 | 0,4261     |
| TcCLB.511785.5   | hypothetical protein                                       | 0,7182 | 0,5343     |
| TcCLB.506721.30  | calpain-like cysteine peptidase, putative                  | 0,7181 | 4,47E-11   |
| TcCLB.507641.236 | hypothetical protein, conserved                            | 0,7181 | 5,897E-09  |
| TcCLB.508965.30  | hypothetical protein                                       | 0,718  | 4,605E-07  |
| TcCLB.511585.50  | hypothetical protein, conserved                            | 0,7178 | 1,587E-07  |
| TcCLB.507997.14  | trans-sialidase, putative (fragment)                       | 0,7178 | 0,001615   |
| TcCLB.510891.30  | retrotransposon hot spot protein (RHS, pseudogene), putat  | 0,7177 | 8,846E-07  |
| TcCLB.504155.10  | mucin-associated surface protein (MASP), putative          | 0,7177 | 0,4079     |
| TcCLB.509213.160 | protein kinase, putative                                   | 0,7173 | 5,93E-11   |

|                  |                                                           |        |            |
|------------------|-----------------------------------------------------------|--------|------------|
| TcCLB.505343.10  | trans-sialidase (pseudogene), putative                    | 0,7173 | 0,1255     |
| TcCLB.505333.10  | N-acetyltransferase complex ARD1 subunit (pseudogene),    | 0,7171 | 0,05283    |
| TcCLB.503955.40  | trans-sialidase, Group II, putative                       | 0,7169 | 2,455E-09  |
| TcCLB.511363.4   | hypothetical protein, conserved                           | 0,7168 | 2,905E-07  |
| TcCLB.510773.50  | hypothetical protein                                      | 0,7168 | 0,005218   |
| TcCLB.503613.50  | PA domain containing protein, putative (ESP7)             | 0,7167 | 1,885E-06  |
| TcCLB.506401.100 | DNA polymerase sigma, putative                            | 0,7165 | 7,297E-15  |
| TcCLB.508061.30  | retrotransposon hot spot protein (RHS, pseudogene), putat | 0,7165 | 0,0002699  |
| TcCLB.511861.50  | trans-sialidase, Group VIII, putative                     | 0,7159 | 0,03876    |
| TcCLB.511469.70  | prohibitin, putative                                      | 0,7155 | 4,566E-11  |
| TcCLB.506989.70  | flagellar radial spoke protein-like, putative             | 0,7155 | 1,44E-07   |
| TcCLB.506939.70  | retrotransposon hot spot protein (RHS, pseudogene), putat | 0,7153 | 0,02401    |
| TcCLB.511603.330 | mucin TcMUCII, putative                                   | 0,7153 | 0,2193     |
| TcCLB.504069.60  | GPI transamidase component GAA1, putative                 | 0,7152 | 1,374E-07  |
| TcCLB.506779.10  | dynein regulatory complex subunit, putative               | 0,7151 | 0,00009831 |
| TcCLB.506625.80  | cAMP-specific phosphodiesterase, putative                 | 0,715  | 1,691E-16  |
| TcCLB.509035.20  | surface protease GP63, putative                           | 0,7149 | 0,1162     |
| TcCLB.509525.380 | mucin TcMUCII, putative                                   | 0,7148 | 0,3637     |
| TcCLB.510477.10  | surface protease GP63, putative                           | 0,7147 | 0,0005686  |
| TcCLB.507031.110 | hypothetical protein, conserved                           | 0,7146 | 8,785E-11  |
| TcCLB.506891.10  | Metal-binding domain-containing protein                   | 0,7144 | 0,00000333 |
| TcCLB.508577.150 | hypothetical protein, conserved                           | 0,7144 | 0,004001   |
| TcCLB.507093.250 | RNA-binding protein, putative                             | 0,7138 | 8,186E-14  |
| TcCLB.508567.100 | hypothetical protein, conserved                           | 0,7137 | 1,132E-14  |
| TcCLB.506327.60  | hypothetical protein, conserved                           | 0,7137 | 0,00001371 |
| TcCLB.508153.140 | protein kinase, putative                                  | 0,7135 | 0,000663   |
| TcCLB.511649.160 | hypothetical protein, conserved                           | 0,7134 | 1,728E-08  |
| TcCLB.511535.30  | hypothetical protein, conserved                           | 0,7133 | 6,52E-12   |
| TcCLB.511663.40  | trans-sialidase (pseudogene), putative                    | 0,7133 | 0,0006908  |
| TcCLB.506265.45  | chaperone DNAJ protein, putative                          | 0,7124 | 0,0004518  |
| TcCLB.508119.40  | hypothetical protein                                      | 0,7123 | 0,1517     |
| TcCLB.508951.90  | hypothetical protein, conserved                           | 0,7117 | 0,00005016 |
| TcCLB.508241.30  | hypothetical protein, conserved                           | 0,7115 | 1,374E-11  |
| TcCLB.508273.10  | AMP deaminase, putative                                   | 0,7113 | 1,458E-11  |
| TcCLB.503837.5   | mucin TcMUCI, putative (fragment)                         | 0,7113 | 0,01137    |
| TcCLB.441729.9   | hypothetical protein (fragment)                           | 0,711  | 0,01995    |
| TcCLB.503909.84  | calpain-like cysteine peptidase, putative                 | 0,7109 | 6,693E-08  |
| TcCLB.510311.180 | hypothetical protein, conserved                           | 0,7104 | 3,116E-07  |
| TcCLB.511603.70  | mucin TcMUCII, putative                                   | 0,7104 | 0,06718    |
| TcCLB.511773.35  | hypothetical protein, conserved (pseudogene)              | 0,7102 | 0,001975   |
| TcCLB.507747.160 | mucin TcMUCII, putative                                   | 0,7102 | 0,07154    |
| TcCLB.506321.300 | hypothetical protein, conserved                           | 0,7101 | 6,043E-10  |
| TcCLB.507071.160 | mucin TcMUCII, putative                                   | 0,7101 | 0,2931     |
| TcCLB.507219.9   | trans-sialidase, putative                                 | 0,71   | 0,02784    |
| TcCLB.508221.30  | mucin-associated surface protein (MASP), putative         | 0,7097 | 0,2815     |



|                  |                                                           |        |            |
|------------------|-----------------------------------------------------------|--------|------------|
| TcCLB.506401.200 | hypothetical protein, conserved                           | 0,7093 | 0,00002854 |
| TcCLB.506281.90  | mucin TcMUCII, putative                                   | 0,7092 | 0,3491     |
| TcCLB.509601.50  | hypothetical protein, conserved                           | 0,7088 | 7,381E-12  |
| TcCLB.511889.20  | retrotransposon hot spot protein (RHS, pseudogene), putat | 0,7087 | 6,984E-08  |
| TcCLB.506375.10  | tryptophanyl-tRNA synthetase, putative                    | 0,7086 | 0,1189     |
| TcCLB.510435.50  | AMP deaminase (pseudogene), putative                      | 0,7084 | 1,772E-06  |
| TcCLB.511807.80  | RNA capping enzyme, nuclear (Cgm1)                        | 0,7083 | 8,703E-17  |
| TcCLB.510411.40  | trans-sialidase, putative                                 | 0,7083 | 0,06494    |
| TcCLB.508777.190 | hypothetical protein, conserved                           | 0,7081 | 0,0004399  |
| TcCLB.511849.20  | mucin TcMUCl, putative                                    | 0,708  | 0,01008    |
| TcCLB.511801.50  | hypothetical protein, conserved                           | 0,7079 | 5,539E-08  |
| TcCLB.459793.10  | mucin TcMUCl, putative                                    | 0,7078 | 0,2123     |
| TcCLB.504827.150 | hypothetical protein, conserved                           | 0,7076 | 2,958E-06  |
| TcCLB.506759.210 | mucin TcMUCII, putative                                   | 0,7073 | 0,345      |
| TcCLB.503953.30  | protein kinase, putative                                  | 0,707  | 1,959E-07  |
| TcCLB.508731.60  | adenylosuccinate synthetase, putative                     | 0,7068 | 1,798E-07  |
| TcCLB.508975.4   | hypothetical protein, conserved (fragment)                | 0,7066 | 0,0002807  |
| TcCLB.511603.130 | hypothetical protein, conserved                           | 0,7063 | 0,3382     |
| TcCLB.508241.90  | hypothetical protein, conserved                           | 0,7059 | 1,059E-11  |
| TcCLB.503865.50  | ankyrin, putative                                         | 0,7059 | 1,627E-10  |
| TcCLB.511127.429 | hypothetical protein, conserved                           | 0,7059 | 0,0007014  |
| TcCLB.506265.90  | hypothetical protein, conserved                           | 0,7058 | 0,0001548  |
| TcCLB.508137.40  | hypothetical protein, conserved                           | 0,7058 | 0,1063     |
| TcCLB.510089.5   | mucin TcMUCII (pseudogene), putative                      | 0,7056 | 0,4476     |
| TcCLB.511903.120 | transketolase, putative                                   | 0,7055 | 1,689E-18  |
| TcCLB.508771.34  | hypothetical protein, conserved                           | 0,7055 | 0,01522    |
| TcCLB.510359.480 | mucin-associated surface protein (MASP, pseudogene), pu   | 0,7055 | 0,4482     |
| TcCLB.509399.20  | metacaspase, putative                                     | 0,7052 | 0,0003435  |
| TcCLB.508153.130 | enoyl-CoA hydratase, mitochondrial precursor, putative    | 0,7051 | 9,828E-10  |
| TcCLB.504081.40  | mucin-associated surface protein (MASP), putative         | 0,7051 | 0,09437    |
| TcCLB.510349.20  | hypothetical protein, conserved                           | 0,7048 | 4,233E-06  |
| TcCLB.506401.160 | hypothetical protein, conserved                           | 0,7046 | 0,00005637 |
| TcCLB.503541.5   | cAMP-specific phosphodiesterase, putative                 | 0,7045 | 0,1195     |
| TcCLB.509753.202 | hypothetical protein                                      | 0,7044 | 0,3039     |
| TcCLB.506249.70  | ABC transporter, putative                                 | 0,7043 | 6,568E-10  |
| TcCLB.511415.30  | retrotransposon hot spot protein (RHS, pseudogene), putat | 0,7043 | 1,537E-07  |
| TcCLB.507237.210 | mucin TcMUCII, putative                                   | 0,7043 | 0,02598    |
| TcCLB.506763.35  | hypothetical protein, conserved (pseudogene)              | 0,7043 | 0,235      |
| TcCLB.508015.50  | hypothetical protein, conserved                           | 0,7042 | 0,00001733 |
| TcCLB.509699.200 | mucin TcMUCII, putative                                   | 0,7042 | 0,3709     |
| TcCLB.506767.60  | hypothetical protein, conserved (pseudogene)              | 0,704  | 0,2624     |
| TcCLB.511213.70  | trans-sialidase (pseudogene), putative                    | 0,7038 | 0,00005899 |
| TcCLB.511643.70  | trans-sialidase, Group VI, putative                       | 0,7038 | 0,03824    |
| TcCLB.506297.350 | SKP1-like protein                                         | 0,7036 | 0,09986    |
| TcCLB.510275.219 | mucin TcMUCII, putative                                   | 0,7036 | 0,348      |

|                   |                                                               |        |            |
|-------------------|---------------------------------------------------------------|--------|------------|
| TcCLB.511887.50   | hypothetical protein, conserved                               | 0,7033 | 0,04583    |
| TcCLB.506691.60   | hypothetical protein, conserved                               | 0,7032 | 0,0001771  |
| TcCLB.508779.9    | hypothetical protein, conserved (fragment)                    | 0,7031 | 1,008E-06  |
| TcCLB.506737.90   | trans-sialidase, Group V, putative                            | 0,703  | 5,349E-08  |
| TcCLB.508551.20   | 40S ribosomal protein S12, putative                           | 0,7028 | 2,642E-20  |
| TcCLB.508705.10   | retrotransposon hot spot protein (RHS, pseudogene), putative  | 0,7026 | 6,304E-07  |
| TcCLB.506265.80   | hypothetical protein, conserved                               | 0,7025 | 0,001195   |
| TcCLB.509275.10   | elongation factor 1-gamma (EF-1-gamma, pseudogene), putative  | 0,7025 | 0,07088    |
| TcCLB.504149.70   | hypothetical protein, conserved                               | 0,7018 | 5,479E-08  |
| TcCLB.506035.20   | dispersed gene family protein 1 (DGF-1, pseudogene), putative | 0,7018 | 0,00002012 |
| TcCLB.511825.63   | peptidyl-prolyl cis-trans isomerase, putative                 | 0,7017 | 5,553E-07  |
| TcCLB.504125.100  | sugar transporter (pseudogene), putative                      | 0,7016 | 0,0001745  |
| TcCLB.506977.70   | ATPase subunit 9, putative                                    | 0,7015 | 2,471E-11  |
| TcCLB.506277.3    | mucin TcMUCII, putative (fragment)                            | 0,7014 | 0,2933     |
| TcCLB.508257.160  | hypothetical protein, conserved                               | 0,7009 | 2,611E-09  |
| TcCLB.506009.40   | hypothetical protein                                          | 0,7009 | 0,01373    |
| TcCLB.507555.50   | trans-sialidase, Group VIII, putative                         | 0,7007 | 0,00012    |
| TcCLB.511815.40   | guide RNA associated protein, GAP2, putative                  | 0,7004 | 2,056E-21  |
| TcCLB.511301.170  | retrotransposon hot spot (RHS) protein, putative              | 0,6998 | 9,502E-07  |
| TcCLB.506779.30   | hypothetical protein, conserved (pseudogene)                  | 0,6996 | 7,609E-11  |
| TcCLB.510529.39   | hypothetical protein, conserved                               | 0,6994 | 0,003914   |
| TcCLB.507497.11   | trans-sialidase, putative (fragment)                          | 0,6993 | 0,05363    |
| TcCLB.508153.1074 | hypothetical protein, conserved                               | 0,6992 | 6,768E-08  |
| TcCLB.506513.130  | kinesin (pseudogene), putative                                | 0,6991 | 1,312E-14  |
| TcCLB.506545.5    | mucin TcMUCI, putative                                        | 0,699  | 0,03101    |
| TcCLB.506173.50   | mucin TcMUCII (pseudogene), putative                          | 0,6989 | 0,1472     |
| TcCLB.511255.410  | surface protease GP63 (pseudogene), putative                  | 0,6988 | 0,1785     |
| TcCLB.509849.20   | hypothetical protein, conserved                               | 0,6987 | 1,068E-07  |
| TcCLB.508501.210  | hypothetical protein, conserved                               | 0,6986 | 0,00001478 |
| TcCLB.504149.90   | hypothetical protein, conserved                               | 0,6985 | 6,339E-16  |
| TcCLB.508293.130  | hypothetical protein                                          | 0,6983 | 0,4493     |
| TcCLB.506773.180  | regulator of chromatin condensation, putative                 | 0,6982 | 2,421E-07  |
| TcCLB.507041.71   | mucin TcMUCI, putative                                        | 0,6981 | 0,1513     |
| TcCLB.509151.50   | hypothetical protein, conserved                               | 0,6979 | 1,565E-14  |
| TcCLB.509111.28   | fucose kinase, putative                                       | 0,6978 | 0,04131    |
| TcCLB.509157.60   | 1-acyl-sn-glycerol-3-phosphate acyltransferase, putative      | 0,6977 | 1,054E-06  |
| TcCLB.509641.10   | hypothetical protein, conserved                               | 0,6976 | 0,000996   |
| TcCLB.504035.70   | cyclophilin, putative                                         | 0,6971 | 0,000011   |
| TcCLB.511807.50   | hypothetical protein, conserved                               | 0,697  | 1,681E-15  |
| TcCLB.509437.170  | hypothetical protein                                          | 0,697  | 0,008503   |
| TcCLB.511181.150  | hypothetical protein, conserved                               | 0,6969 | 6,445E-06  |
| TcCLB.511069.4    | transketolase, putative                                       | 0,6969 | 0,0001608  |
| TcCLB.506133.80   | mucin-associated surface protein (MASP, pseudogene), putative | 0,6967 | 0,08079    |
| TcCLB.507681.200  | serine carboxypeptidase S28, putative                         | 0,6966 | 6,567E-10  |
| TcCLB.508903.30   | retrotransposon hot spot protein (RHS, pseudogene), putative  | 0,6966 | 0,0004389  |

|                  |                                                           |        |            |
|------------------|-----------------------------------------------------------|--------|------------|
| TcCLB.504199.10  | hypothetical protein, conserved                           | 0,6964 | 1,038E-14  |
| TcCLB.511603.190 | mucin-associated surface protein (MASP), putative         | 0,6964 | 0,1804     |
| TcCLB.510111.20  | trans-sialidase, Group II, putative                       | 0,696  | 0,01995    |
| TcCLB.510225.20  | hypothetical protein, conserved                           | 0,6959 | 0,00004801 |
| TcCLB.504801.10  | beta galactofuranosyl glycosyltransferase (pseudogene), p | 0,6959 | 0,02976    |
| TcCLB.506129.50  | trans-sialidase, Group IV, putative                       | 0,6956 | 1,245E-07  |
| TcCLB.508669.21  | hypothetical protein                                      | 0,6955 | 0,1918     |
| TcCLB.510005.11  | endosomal integral membrane protein (pseudogene), puta    | 0,6954 | 0,00006537 |
| TcCLB.510865.10  | retrotransposon hot spot protein (RHS, pseudogene), putat | 0,6954 | 0,000676   |
| TcCLB.504055.30  | hypothetical protein                                      | 0,6951 | 9,281E-06  |
| TcCLB.508767.20  | surface protein TolT (TolT)                               | 0,6951 | 0,001155   |
| TcCLB.504081.30  | trans-sialidase (pseudogene), putative                    | 0,6949 | 0,01471    |
| TcCLB.456097.30  | glycerophosphoryl diester phosphodiesterase, putative     | 0,6948 | 0,00004589 |
| TcCLB.504249.30  | mucin-associated surface protein (MASP), putative         | 0,6947 | 0,09107    |
| TcCLB.507573.10  | hypothetical protein, conserved (pseudogene)              | 0,6937 | 1,091E-06  |
| TcCLB.508461.260 | Bem46-like serine peptidase, putative                     | 0,6933 | 4,261E-09  |
| TcCLB.506675.20  | hypothetical protein, conserved (pseudogene)              | 0,6931 | 1,182E-08  |
| TcCLB.510933.90  | mucin-associated surface protein (MASP), putative         | 0,6931 | 0,09239    |
| TcCLB.508891.60  | serine/threonine protein phosphatase, putative            | 0,693  | 0,0006705  |
| TcCLB.508341.10  | mucin-associated surface protein (MASP), putative         | 0,693  | 0,367      |
| TcCLB.510403.50  | retrotransposon hot spot protein (RHS, pseudogene), putat | 0,6927 | 3,753E-12  |
| TcCLB.509615.40  | alpha-adaptin-like (pseudogene), putative                 | 0,6925 | 6,909E-07  |
| TcCLB.508569.130 | 6-phosphofructo-2-kinase/fructose-2,6-biphosphatase, put  | 0,6923 | 2,381E-13  |
| TcCLB.510939.30  | mucin TcMUCI, putative                                    | 0,6921 | 0,06163    |
| TcCLB.508799.104 | hypothetical protein, conserved                           | 0,692  | 0,0002225  |
| TcCLB.506981.10  | dispersed gene family protein 1 (DGF-1), putative (fragme | 0,6918 | 0,1016     |
| TcCLB.482425.10  | retrotransposon hot spot (RHS) protein, putative          | 0,6918 | 0,1052     |
| TcCLB.510037.20  | surface protease GP63 (pseudogene), putative              | 0,6918 | 0,1105     |
| TcCLB.508555.60  | Calpain-like protein 1 (CAP5.5)                           | 0,6916 | 2,775E-09  |
| TcCLB.510661.140 | hypothetical protein, conserved                           | 0,6913 | 1,427E-09  |
| TcCLB.508347.50  | hypothetical protein, conserved                           | 0,6913 | 0,001749   |
| TcCLB.509429.30  | retrotransposon hot spot protein (RHS, pseudogene), putat | 0,6912 | 1,313E-08  |
| TcCLB.507681.210 | Flagellar Member 2 (FLAM2)                                | 0,6911 | 8,583E-24  |
| TcCLB.509479.20  | mucin TcMUCII, putative                                   | 0,691  | 0,148      |
| TcCLB.510561.40  | mucin TcMUCII, putative                                   | 0,6909 | 0,005895   |
| TcCLB.506775.50  | hypothetical protein, conserved                           | 0,6908 | 2,607E-14  |
| TcCLB.511809.20  | methylenetetrahydrofolate dehydrogenase-like protein, pu  | 0,6904 | 5,269E-07  |
| TcCLB.506211.20  | hypothetical protein, conserved                           | 0,6901 | 0,00001114 |
| TcCLB.503905.40  | hypothetical protein, conserved                           | 0,69   | 0,00004467 |
| TcCLB.503717.20  | mucin-associated surface protein (MASP), putative         | 0,69   | 0,04691    |
| TcCLB.510507.20  | 3-ketoacyl-CoA thiolase, putative                         | 0,6899 | 9,026E-16  |
| TcCLB.511809.140 | histone H2A, putative                                     | 0,6899 | 5,736E-15  |
| TcCLB.503563.29  | hypothetical protein                                      | 0,6899 | 0,04219    |
| TcCLB.511693.120 | hypothetical protein                                      | 0,6898 | 4,247E-09  |
| TcCLB.510361.30  | mucin-associated surface protein (MASP), putative         | 0,6894 | 0,2582     |

|                  |                                                            |        |            |
|------------------|------------------------------------------------------------|--------|------------|
| TcCLB.509761.20  | 3,2-trans-enoyl-CoA isomerase, mitochondrial precursor (p  | 0,689  | 1,29E-11   |
| TcCLB.509993.40  | mucin TcMUCI, putative                                     | 0,689  | 0,0584     |
| TcCLB.508409.210 | Hsc70-interacting protein, putative (HIP)                  | 0,6887 | 6,634E-20  |
| TcCLB.507835.10  | trans-sialidase (pseudogene), putative                     | 0,6886 | 0,00495    |
| TcCLB.506899.40  | mucin TcMUCII, putative                                    | 0,6886 | 0,1775     |
| TcCLB.509275.20  | mucin-associated surface protein (MASP), putative (fragm   | 0,6886 | 0,1865     |
| TcCLB.508367.70  | trans-sialidase (pseudogene), putative                     | 0,6885 | 0,09232    |
| TcCLB.503989.30  | hypothetical protein, conserved (pseudogene)               | 0,6882 | 9,48E-16   |
| TcCLB.506501.40  | mucin TcMUCII, putative                                    | 0,6882 | 0,1511     |
| TcCLB.511389.150 | thiolase protein-like protein, putative                    | 0,6881 | 2,783E-17  |
| TcCLB.511903.170 | hypothetical protein, conserved                            | 0,6881 | 1,424E-10  |
| TcCLB.503581.20  | PPlase, putative                                           | 0,688  | 0,0005254  |
| TcCLB.506811.120 | hypothetical protein, conserved                            | 0,6879 | 3,348E-11  |
| TcCLB.506247.370 | hypothetical protein, conserved                            | 0,6879 | 7,89E-11   |
| TcCLB.507523.80  | mucin-associated surface protein (MASP), putative          | 0,6878 | 0,1093     |
| TcCLB.510741.20  | hypothetical protein, conserved                            | 0,6877 | 0,00002954 |
| TcCLB.503689.30  | flagellar protofilament ribbon protein, putative           | 0,6876 | 1,191E-09  |
| TcCLB.507641.240 | hypothetical protein                                       | 0,6875 | 0,09359    |
| TcCLB.509959.40  | beta galactofuranosyl glycosyltransferase, putative        | 0,6875 | 0,2847     |
| TcCLB.503861.50  | beta galactofuranosyl glycosyltransferase, putative        | 0,6873 | 1,2E-09    |
| TcCLB.508365.4   | mucin-associated surface protein (MASP), putative          | 0,6873 | 0,3897     |
| TcCLB.507053.110 | hypothetical protein, conserved                            | 0,6872 | 1,413E-11  |
| TcCLB.430061.9   | hypothetical protein, conserved                            | 0,6868 | 0,06998    |
| TcCLB.510849.30  | hypothetical protein, conserved (pseudogene)               | 0,6863 | 0,00004376 |
| TcCLB.506765.10  | retrotransposon hot spot protein (RHS, pseudogene), putat  | 0,6863 | 0,04424    |
| TcCLB.511367.129 | hypothetical protein, conserved                            | 0,6862 | 8,569E-06  |
| TcCLB.510039.109 | sec1 family transport protein, putative (fragment)         | 0,6862 | 0,001844   |
| TcCLB.509207.11  | histone H2A, putative                                      | 0,6861 | 2,669E-19  |
| TcCLB.509219.50  | hypothetical protein, conserved (pseudogene)               | 0,686  | 0,0001463  |
| TcCLB.510583.80  | surface protease GP63 (pseudogene), putative               | 0,686  | 0,1807     |
| TcCLB.511007.10  | dispersed gene family protein 1 (DGF-1), putative          | 0,6859 | 0,001592   |
| TcCLB.506067.198 | mucin-associated surface protein (MASP, pseudogene), pu    | 0,6858 | 0,3312     |
| TcCLB.510053.70  | hypothetical protein, conserved                            | 0,6856 | 3,422E-12  |
| TcCLB.510755.80  | hypothetical protein, conserved                            | 0,6855 | 0,00002119 |
| TcCLB.506219.30  | exosome component CSL4, putative (CSL4)                    | 0,6852 | 0,00001289 |
| TcCLB.506599.430 | mucin TcMUCII, putative                                    | 0,6852 | 0,2176     |
| TcCLB.508503.80  | hypothetical protein                                       | 0,6851 | 0,0003289  |
| TcCLB.508293.80  | mucin-associated surface protein (MASP), putative          | 0,685  | 0,3107     |
| TcCLB.504003.14  | hypothetical protein, conserved                            | 0,6849 | 0,00006613 |
| TcCLB.508221.680 | serine-alanine-and proline-rich protein (pseudogene), puta | 0,6848 | 0,3408     |
| TcCLB.508173.54  | hypothetical protein, conserved                            | 0,6846 | 1,836E-12  |
| TcCLB.506361.50  | mucin-associated surface protein (MASP), putative          | 0,6845 | 0,1216     |
| TcCLB.506993.63  | mucin TcMUCI, putative                                     | 0,6844 | 0,309      |
| TcCLB.511725.230 | protein kinase, putative                                   | 0,6842 | 1,129E-12  |
| TcCLB.511809.135 | histone H2A, putative                                      | 0,6841 | 2,397E-14  |

|                  |                                                            |        |            |
|------------------|------------------------------------------------------------|--------|------------|
| TcCLB.503415.30  | hypothetical protein, conserved                            | 0,6838 | 3,266E-11  |
| TcCLB.511523.100 | aldehyde dehydrogenase, putative                           | 0,6837 | 6,899E-10  |
| TcCLB.509897.279 | mucin-associated surface protein (MASP), putative          | 0,6837 | 0,2018     |
| TcCLB.511791.10  | mucin-associated surface protein (MASP), putative          | 0,6837 | 0,4923     |
| TcCLB.510857.30  | hypothetical protein, conserved                            | 0,6835 | 8,349E-10  |
| TcCLB.506801.40  | mucin-associated surface protein (MASP), putative          | 0,6834 | 0,008531   |
| TcCLB.508165.60  | mucin TcMUCII, putative                                    | 0,6834 | 0,4253     |
| TcCLB.506987.10  | retrotransposon hot spot protein (RHS, pseudogene), putat  | 0,6831 | 0,05897    |
| TcCLB.509373.21  | elongation factor 1-gamma (EF-1-gamma, pseudogene), p      | 0,6831 | 0,08177    |
| TcCLB.510575.20  | hypothetical protein, conserved                            | 0,6829 | 0,0002912  |
| TcCLB.509429.210 | leucine-rich repeat protein (LRRP), putative               | 0,6828 | 3,568E-11  |
| TcCLB.506063.59  | dispersed gene family protein 1 (DGF-1), putative          | 0,6827 | 0,007651   |
| TcCLB.505975.41  | retrotransposon hot spot protein (RHS, pseudogene), putat  | 0,6825 | 3,247E-06  |
| TcCLB.511239.49  | adenosine 5'-monophosphoramidase, putative                 | 0,6825 | 0,0001353  |
| TcCLB.509897.150 | mucin-associated surface protein (MASP), putative          | 0,6825 | 0,0001398  |
| TcCLB.509993.10  | mucin TcMUCL, putative                                     | 0,6824 | 0,1814     |
| TcCLB.510749.50  | Flagellar Member 5 (FLAM5)                                 | 0,6822 | 9,661E-09  |
| TcCLB.507185.26  | mucin-associated surface protein (MASP, pseudogene), pu    | 0,6822 | 0,002533   |
| TcCLB.509759.19  | pumilio/PUF RNA binding protein 1, putative (PUF1)         | 0,6821 | 8,04E-11   |
| TcCLB.504213.100 | hypothetical protein, conserved                            | 0,6819 | 0,003245   |
| TcCLB.504149.55  | acyl-CoA thioesterase, putative                            | 0,6817 | 1,849E-10  |
| TcCLB.508593.20  | trans-sialidase, Group IV, putative                        | 0,6816 | 0,003922   |
| TcCLB.506773.150 | hypothetical protein                                       | 0,6814 | 0,00000068 |
| TcCLB.507293.20  | dispersed gene family protein 1 (DGF-1, pseudogene), putat | 0,6814 | 0,00003696 |
| TcCLB.509049.30  | hypothetical protein, conserved                            | 0,6813 | 5,471E-13  |
| TcCLB.511815.10  | hypothetical protein                                       | 0,6813 | 1,141E-12  |
| TcCLB.510439.30  | hypothetical protein, conserved                            | 0,6813 | 2,304E-10  |
| TcCLB.510103.10  | hypothetical protein                                       | 0,6812 | 0,0006353  |
| TcCLB.507625.150 | hypothetical protein, conserved                            | 0,6807 | 0,0001316  |
| TcCLB.504639.60  | trans-sialidase, putative                                  | 0,6802 | 0,01501    |
| TcCLB.506297.340 | hypothetical protein, conserved                            | 0,6801 | 2,745E-06  |
| TcCLB.506295.190 | glycine dehydrogenase [decarboxylating] (pseudogene), pu   | 0,6799 | 0,02363    |
| TcCLB.510283.80  | hypothetical protein, conserved                            | 0,6795 | 0,00007304 |
| TcCLB.511801.34  | hypothetical protein, conserved                            | 0,6793 | 7,616E-06  |
| TcCLB.508647.210 | dynein arm light chain, putative                           | 0,6792 | 1,931E-13  |
| TcCLB.506009.50  | hypothetical protein, conserved                            | 0,679  | 9,477E-09  |
| TcCLB.510465.110 | mucin-associated surface protein (MASP, pseudogene), pu    | 0,6787 | 0,09285    |
| TcCLB.510543.140 | retrotransposon hot spot protein (RHS, pseudogene), putat  | 0,6784 | 0,0002616  |
| TcCLB.506759.160 | mucin TcMUCII, putative                                    | 0,6781 | 0,5575     |
| TcCLB.504797.60  | hypothetical protein, conserved                            | 0,6777 | 2,622E-08  |
| TcCLB.510061.40  | retrotransposon hot spot protein (RHS, pseudogene), putat  | 0,6775 | 0,0001161  |
| TcCLB.510495.20  | mucin-associated surface protein (MASP), putative          | 0,6775 | 0,4915     |
| TcCLB.506211.40  | intraflagellar transport protein 52, putative (IFT52)      | 0,6774 | 7,73E-13   |
| TcCLB.507811.107 | hypothetical protein, conserved                            | 0,6774 | 0,0001145  |
| TcCLB.511589.140 | phosphoenolpyruvate mutase, putative                       | 0,6771 | 4,106E-10  |

|                  |                                                               |        |            |
|------------------|---------------------------------------------------------------|--------|------------|
| TcCLB.511469.60  | Trk system potassium uptake protein (HKT1)                    | 0,677  | 8,242E-06  |
| TcCLB.506131.50  | hypothetical protein                                          | 0,6769 | 0,438      |
| TcCLB.509211.20  | hypothetical protein, conserved                               | 0,6768 | 1,894E-13  |
| TcCLB.511659.9   | hypothetical protein, conserved (fragment)                    | 0,6768 | 0,00000116 |
| TcCLB.508237.18  | SNF2 DNA repair protein, putative                             | 0,6767 | 0,0000017  |
| TcCLB.511621.120 | hypothetical protein, conserved                               | 0,6764 | 0,00008881 |
| TcCLB.506781.30  | mucin TcMUCII, putative                                       | 0,6764 | 0,1318     |
| TcCLB.510165.30  | hypothetical protein, conserved                               | 0,6761 | 4,253E-09  |
| TcCLB.505201.20  | dispersed gene family protein 1 (DGF-1, pseudogene), putative | 0,6761 | 0,0007883  |
| TcCLB.508837.120 | prohibitin, putative                                          | 0,676  | 1,119E-11  |
| TcCLB.508173.210 | hypothetical protein, conserved                               | 0,676  | 5,85E-10   |
| TcCLB.511521.20  | hypothetical protein, conserved                               | 0,676  | 0,00005872 |
| TcCLB.506289.200 | hypothetical protein                                          | 0,676  | 0,1575     |
| TcCLB.506729.80  | hypothetical protein, conserved                               | 0,6759 | 0,00001854 |
| TcCLB.506223.70  | hypothetical protein                                          | 0,6759 | 0,003609   |
| TcCLB.510377.420 | surface protease GP63, putative                               | 0,6758 | 0,5133     |
| TcCLB.506201.60  | hypothetical protein                                          | 0,6755 | 0,001649   |
| TcCLB.509295.5   | retrotransposon hot spot protein (RHS, pseudogene), putative  | 0,6754 | 2,899E-08  |
| TcCLB.509699.85  | surface protease GP63 (pseudogene), putative                  | 0,6754 | 0,09389    |
| TcCLB.506789.240 | hypothetical protein, conserved                               | 0,6752 | 0,00002071 |
| TcCLB.503939.84  | hypothetical protein, conserved                               | 0,6752 | 0,001281   |
| TcCLB.511215.119 | 69 kDa paraflagellar rod protein, putative                    | 0,6751 | 1,473E-14  |
| TcCLB.506595.65  | hypothetical protein                                          | 0,6751 | 0,002168   |
| TcCLB.511843.35  | hypothetical protein                                          | 0,6749 | 0,07494    |
| TcCLB.508777.30  | hypothetical protein, conserved                               | 0,6746 | 4,626E-13  |
| TcCLB.508113.20  | trans-sialidase (pseudogene), putative                        | 0,6746 | 0,001157   |
| TcCLB.507777.41  | trans-sialidase (pseudogene), putative                        | 0,6744 | 0,03474    |
| TcCLB.503717.80  | mucin-associated surface protein (MASP, pseudogene), putative | 0,6744 | 0,1949     |
| TcCLB.506147.190 | hypothetical protein, conserved                               | 0,6743 | 2,08E-09   |
| TcCLB.510535.64  | hypothetical protein, conserved                               | 0,6742 | 5,861E-08  |
| TcCLB.507787.40  | hypothetical protein, conserved                               | 0,6742 | 0,0002655  |
| TcCLB.507953.110 | retrotransposon hot spot protein (RHS, pseudogene), putative  | 0,6741 | 0,2177     |
| TcCLB.511217.170 | hypothetical protein, conserved                               | 0,674  | 1,813E-06  |
| TcCLB.504099.50  | trans-sialidase, Group II, putative                           | 0,674  | 0,0004407  |
| TcCLB.510915.10  | mucin-associated surface protein (MASP), putative             | 0,6738 | 0,0001111  |
| TcCLB.506753.200 | hypothetical protein, conserved                               | 0,6735 | 9,096E-07  |
| TcCLB.509755.70  | mucin TcMUCII, putative                                       | 0,6735 | 0,4606     |
| TcCLB.506405.140 | hypothetical protein, conserved                               | 0,6733 | 3,856E-09  |
| TcCLB.507063.150 | hypothetical protein, conserved                               | 0,6729 | 8,318E-07  |
| TcCLB.508177.64  | hypothetical protein, conserved                               | 0,6729 | 0,00001465 |
| TcCLB.509725.139 | damage-specific DNA binding protein, putative                 | 0,6728 | 0,00005016 |
| TcCLB.507669.70  | Dynein intermediate chain 1, axonemal (DNAI1)                 | 0,6727 | 8,39E-08   |
| TcCLB.507085.130 | hypothetical protein                                          | 0,6726 | 0,2126     |
| TcCLB.507615.70  | deoxyhypusine hydroxylase, putative                           | 0,6722 | 0,0001133  |
| TcCLB.509023.150 | integral membrane transport protein, putative                 | 0,6718 | 0,0002623  |

|                  |                                                              |        |            |
|------------------|--------------------------------------------------------------|--------|------------|
| TcCLB.508265.10  | glutathione-S-transferase/glutaredoxin, putative             | 0,6714 | 3,158E-06  |
| TcCLB.508153.540 | hypothetical protein, conserved                              | 0,6713 | 1,86E-10   |
| TcCLB.506459.230 | trans-sialidase, Group V, putative                           | 0,6709 | 0,005404   |
| TcCLB.506139.100 | mucin TcMUCII, putative                                      | 0,6697 | 0,268      |
| TcCLB.508647.110 | Present in the outer mitochondrial membrane proteome 1.      | 0,6696 | 6,493E-10  |
| TcCLB.509859.20  | hypothetical protein, conserved                              | 0,6696 | 5,368E-06  |
| TcCLB.506405.80  | hypothetical protein, conserved                              | 0,6695 | 0,0001324  |
| TcCLB.473111.10  | lathosterol oxidase, putative                                | 0,6692 | 5,201E-06  |
| TcCLB.506625.35  | trans-sialidase (pseudogene), putative                       | 0,6689 | 0,1039     |
| TcCLB.507383.10  | hypothetical protein, conserved                              | 0,6682 | 0,1336     |
| TcCLB.507809.60  | hypothetical protein, conserved                              | 0,6681 | 2,049E-09  |
| TcCLB.503729.10  | hypothetical protein, conserved                              | 0,668  | 0,0002937  |
| TcCLB.509229.110 | hypothetical protein, conserved                              | 0,6678 | 2,905E-11  |
| TcCLB.503575.50  | fatty acyl CoA synthetase, putative                          | 0,6676 | 4,708E-08  |
| TcCLB.509237.130 | Calpain-like protein 1 (CAP5.5)                              | 0,6675 | 2,252E-18  |
| TcCLB.511609.10  | retrotransposon hot spot protein (RHS, pseudogene), putative | 0,6674 | 0,07819    |
| TcCLB.511409.50  | hypothetical protein, conserved                              | 0,6671 | 8,748E-08  |
| TcCLB.506401.50  | malonyl-CoA decarboxylase, mitochondrial precursor, putative | 0,6669 | 4,401E-09  |
| TcCLB.508003.30  | hypothetical protein, conserved (pseudogene)                 | 0,6669 | 0,0009689  |
| TcCLB.510065.30  | translationally controlled tumor protein (TCTP), putative    | 0,6665 | 2,28E-22   |
| TcCLB.506575.70  | Present in the outer mitochondrial membrane proteome 4.      | 0,6664 | 6,857E-08  |
| TcCLB.510055.110 | fructosamine kinase, putative                                | 0,6662 | 0,0000439  |
| TcCLB.508045.60  | hypothetical protein, conserved                              | 0,6661 | 1,321E-09  |
| TcCLB.510307.140 | retrotransposon hot spot protein (RHS, pseudogene), putative | 0,666  | 2,019E-07  |
| TcCLB.506629.50  | hypothetical protein, conserved                              | 0,666  | 1,538E-06  |
| TcCLB.508547.180 | hypothetical protein, conserved                              | 0,6656 | 2,73E-10   |
| TcCLB.506907.30  | hypothetical protein, conserved                              | 0,6655 | 0,0001156  |
| TcCLB.506605.90  | hypothetical protein, conserved                              | 0,6652 | 0,0001011  |
| TcCLB.506943.4   | aldehyde dehydrogenase, putative                             | 0,6648 | 1,821E-12  |
| TcCLB.504427.110 | acetyl-CoA synthetase, putative                              | 0,6647 | 5,143E-08  |
| TcCLB.503433.10  | hypothetical protein, conserved                              | 0,6647 | 0,0001682  |
| TcCLB.508365.130 | mucin TcMUCII, putative                                      | 0,6647 | 0,2713     |
| TcCLB.508221.40  | mucin TcMUCII, putative                                      | 0,6647 | 0,2924     |
| TcCLB.506697.10  | hypothetical protein, conserved                              | 0,6646 | 4,476E-08  |
| TcCLB.397937.10  | pumilio/PUF RNA binding protein 1, putative (PUF1)           | 0,6645 | 9,374E-06  |
| TcCLB.511579.9   | fatty acyl CoA synthetase 1, putative                        | 0,6645 | 0,00544    |
| TcCLB.509905.60  | trans-sialidase (pseudogene), putative                       | 0,6645 | 0,01202    |
| TcCLB.511681.20  | histone H4, putative                                         | 0,6642 | 0,0018     |
| TcCLB.509507.10  | hypothetical protein, conserved                              | 0,6638 | 2,977E-10  |
| TcCLB.506677.30  | hypothetical protein, conserved                              | 0,6627 | 0,00000386 |
| TcCLB.510983.19  | retrotransposon hot spot (RHS) protein, putative             | 0,6626 | 0,0003463  |
| TcCLB.507671.10  | hypothetical protein                                         | 0,6623 | 0,0008047  |
| TcCLB.511013.10  | retrotransposon hot spot protein (RHS, pseudogene), putative | 0,6621 | 0,005626   |
| TcCLB.510421.310 | hypothetical protein, conserved                              | 0,662  | 5,793E-06  |
| TcCLB.510583.140 | trans-sialidase (pseudogene), putative                       | 0,662  | 0,09588    |

|                  |                                                           |        |            |
|------------------|-----------------------------------------------------------|--------|------------|
| TcCLB.509195.30  | mucin-associated surface protein (MASP), putative         | 0,6615 | 0,3494     |
| TcCLB.510859.50  | hypothetical protein, conserved                           | 0,6614 | 0,00002202 |
| TcCLB.511635.60  | hypothetical protein, conserved                           | 0,6612 | 1,019E-06  |
| TcCLB.507509.50  | polypeptide deformylase-like protein, putative            | 0,6611 | 3,982E-06  |
| TcCLB.509715.150 | hypothetical protein                                      | 0,661  | 0,005498   |
| TcCLB.504149.150 | hypothetical protein, conserved                           | 0,6608 | 5,548E-12  |
| TcCLB.510853.30  | trans-sialidase (pseudogene), putative                    | 0,6607 | 0,0005062  |
| TcCLB.511671.130 | hypothetical protein, conserved                           | 0,6597 | 5,443E-08  |
| TcCLB.506761.40  | mucin-associated surface protein (MASP, pseudogene), pu   | 0,6597 | 0,1123     |
| TcCLB.510377.330 | trans-sialidase, Group V, putative                        | 0,6591 | 0,0008778  |
| TcCLB.508175.280 | hypothetical protein, conserved                           | 0,6589 | 1,403E-09  |
| TcCLB.506295.100 | hypothetical protein, conserved                           | 0,6587 | 3,063E-13  |
| TcCLB.508323.84  | peptidyl-prolyl cis-trans isomerase, putative             | 0,6587 | 0,002124   |
| TcCLB.508541.130 | mucin-associated surface protein (MASP), putative         | 0,6586 | 0,004802   |
| TcCLB.504109.150 | elongation factor, putative                               | 0,6585 | 4,569E-12  |
| TcCLB.507083.30  | apurinic/aprimidinic endonuclease, putative               | 0,6583 | 0,0000052  |
| TcCLB.509177.59  | hypothetical protein, conserved                           | 0,6583 | 0,00001463 |
| TcCLB.507957.150 | mucin-associated surface protein (MASP), putative         | 0,6582 | 0,04388    |
| TcCLB.504239.420 | mucin-associated surface protein (MASP), putative         | 0,6578 | 0,1574     |
| TcCLB.503399.10  | hypothetical protein, conserved                           | 0,6577 | 0,0004143  |
| TcCLB.509787.30  | retrotransposon hot spot protein (RHS, pseudogene), putat | 0,6576 | 0,0001891  |
| TcCLB.507731.10  | mucin-associated surface protein (MASP), putative         | 0,6575 | 0,08775    |
| TcCLB.508647.264 | hypothetical protein, conserved                           | 0,6568 | 6,887E-10  |
| TcCLB.506779.130 | hypothetical protein                                      | 0,6567 | 2,766E-07  |
| TcCLB.506693.40  | hypothetical protein, conserved                           | 0,6563 | 0,009207   |
| TcCLB.506683.180 | dispersed gene family protein 1 (DGF-1), putative         | 0,6562 | 0,00001985 |
| TcCLB.507975.10  | retrotransposon hot spot protein (RHS, pseudogene), putat | 0,6559 | 5,795E-11  |
| TcCLB.510241.90  | hypothetical protein, conserved                           | 0,6556 | 3,478E-10  |
| TcCLB.510885.130 | hypothetical protein, conserved                           | 0,6556 | 0,00004759 |
| TcCLB.511003.150 | hypothetical protein                                      | 0,6555 | 2,581E-09  |
| TcCLB.506691.90  | serine/threonine protein kinase, putative                 | 0,6555 | 0,215      |
| TcCLB.510769.190 | retrotransposon hot spot protein (RHS, pseudogene), putat | 0,6554 | 0,00003064 |
| TcCLB.511255.299 | mucin TcMUCII, putative                                   | 0,6554 | 0,1988     |
| TcCLB.506025.40  | hypothetical protein, conserved                           | 0,6552 | 2,67E-10   |
| TcCLB.511173.340 | mucin TcMUCII (pseudogene), putative                      | 0,6547 | 0,0545     |
| TcCLB.510155.200 | hypothetical protein, conserved                           | 0,6545 | 5,897E-06  |
| TcCLB.507045.5   | trans-sialidase (pseudogene), putative                    | 0,6545 | 0,2359     |
| TcCLB.511313.30  | formin, putative                                          | 0,6543 | 0,0119     |
| TcCLB.506263.30  | D-isomer specific 2-hydroxyacid dehydrogenase-protein, pu | 0,6542 | 0,02436    |
| TcCLB.510431.274 | 60S ribosomal protein L37, putative                       | 0,654  | 7,38E-15   |
| TcCLB.506753.240 | hypothetical protein, conserved                           | 0,654  | 0,001722   |
| TcCLB.508045.70  | hypothetical protein, conserved                           | 0,6537 | 6,84E-17   |
| TcCLB.510279.330 | mucin-associated surface protein (MASP), putative         | 0,6537 | 0,1126     |
| TcCLB.503733.70  | phosphoacetylglucosamine mutase, putative                 | 0,6535 | 7,327E-06  |
| TcCLB.402857.10  | hypothetical protein, conserved (fragment)                | 0,6531 | 4,899E-06  |



|                  |                                                           |        |            |
|------------------|-----------------------------------------------------------|--------|------------|
| TcCLB.504625.80  | hypothetical protein, conserved                           | 0,6531 | 0,0000068  |
| TcCLB.507641.180 | endochitinase, putative                                   | 0,6531 | 0,0003115  |
| TcCLB.450489.10  | histone acetyltransferase, putative                       | 0,653  | 0,0001646  |
| TcCLB.506931.20  | hypothetical protein, conserved                           | 0,6529 | 2,568E-07  |
| TcCLB.510641.10  | retrotransposon hot spot protein (RHS, pseudogene), putat | 0,6529 | 0,02013    |
| TcCLB.508119.150 | hypothetical protein, conserved                           | 0,6528 | 0,00006865 |
| TcCLB.507443.53  | hypothetical protein                                      | 0,6528 | 0,1086     |
| TcCLB.507221.80  | 5'-3' exoribonuclease C, putative (fragment) (XRNC)       | 0,6527 | 6,413E-06  |
| TcCLB.505977.26  | 60S acidic ribosomal protein P2, putative                 | 0,6524 | 6,958E-13  |
| TcCLB.504797.10  | acidocalcisomal exopolyphosphatase, putative              | 0,6524 | 2,834E-06  |
| TcCLB.503957.120 | retrotransposon hot spot (RHS) protein, putative          | 0,6515 | 0,00000301 |
| TcCLB.510659.130 | hypothetical protein, conserved                           | 0,6513 | 3,027E-16  |
| TcCLB.504219.50  | hypothetical protein, conserved (pseudogene)              | 0,6512 | 0,4601     |
| TcCLB.506825.80  | hypothetical protein, conserved                           | 0,6509 | 6,778E-11  |
| TcCLB.506109.29  | dispersed gene family protein 1 (DGF-1), putative         | 0,6509 | 0,001014   |
| TcCLB.509053.140 | succinate dehydrogenase subunit                           | 0,6508 | 7,784E-11  |
| TcCLB.509209.10  | endoplasmatic reticulum retrieval protein, putative       | 0,6507 | 4,34E-12   |
| TcCLB.504045.100 | hypothetical protein, conserved                           | 0,6505 | 1,827E-07  |
| TcCLB.510577.10  | hypothetical protein, conserved                           | 0,6502 | 0,134      |
| TcCLB.510983.5   | trans-sialidase (pseudogene), putative                    | 0,6501 | 0,08619    |
| TcCLB.508501.230 | monothiol glutaredoxin, putative                          | 0,65   | 0,0003173  |
| TcCLB.503437.21  | N-acetyltransferase complex ARD1 subunit (pseudogene),    | 0,65   | 0,222      |
| TcCLB.506741.30  | mucin-associated surface protein (MASP, pseudogene), pu   | 0,65   | 0,46       |
| TcCLB.511183.590 | mucin TcMUCII, putative                                   | 0,6497 | 0,07181    |
| TcCLB.508525.30  | hypothetical protein, conserved                           | 0,6495 | 6,434E-09  |
| TcCLB.506171.50  | retrotransposon hot spot protein (RHS, pseudogene), putat | 0,6495 | 0,0001645  |
| TcCLB.508257.190 | hypothetical protein, conserved                           | 0,6494 | 0,0005678  |
| TcCLB.511739.30  | hypothetical protein, conserved                           | 0,649  | 0,0008379  |
| TcCLB.510503.130 | mucin TcMUCII, putative                                   | 0,649  | 0,2717     |
| TcCLB.504429.70  | retrotransposon hot spot protein (RHS, pseudogene), putat | 0,6487 | 3,83E-11   |
| TcCLB.503681.29  | 30S ribosomal protein S8, putative                        | 0,6486 | 0,2935     |
| TcCLB.511737.90  | hypothetical protein, conserved                           | 0,6484 | 9,217E-07  |
| TcCLB.511807.270 | hypothetical protein, conserved                           | 0,6482 | 6,461E-11  |
| TcCLB.506297.190 | pyruvate phosphate dikinase, putative                     | 0,6479 | 1,282E-11  |
| TcCLB.506873.10  | hypothetical protein, conserved                           | 0,6479 | 2,112E-08  |
| TcCLB.506251.20  | hypothetical protein, conserved                           | 0,6479 | 0,002603   |
| TcCLB.511009.9   | dispersed gene family protein 1 (DGF-1), putative (fragme | 0,6475 | 0,03799    |
| TcCLB.508163.90  | trans-sialidase (pseudogene), putative                    | 0,6474 | 0,1724     |
| TcCLB.510377.410 | mucin TcMUCII, putative                                   | 0,6473 | 0,2978     |
| TcCLB.510303.190 | cell cycle associated protein MOB1, putative              | 0,6471 | 1,595E-07  |
| TcCLB.504351.30  | hypothetical protein, conserved (pseudogene)              | 0,6471 | 0,001481   |
| TcCLB.508053.5   | hypothetical protein, conserved (fragment)                | 0,6469 | 0,1844     |
| TcCLB.508503.30  | hypothetical protein                                      | 0,6468 | 0,00000505 |
| TcCLB.506021.20  | trans-sialidase, Group II, putative                       | 0,6465 | 0,02952    |
| TcCLB.509437.70  | hypothetical protein, conserved                           | 0,6463 | 2,511E-14  |

|                  |                                                           |        |            |
|------------------|-----------------------------------------------------------|--------|------------|
| TcCLB.510643.150 | ribosomal P protein AGP2beta-1 (pseudogene), putative     | 0,6463 | 0,000654   |
| TcCLB.503903.70  | hypothetical protein, conserved                           | 0,6461 | 0,00003675 |
| TcCLB.506393.30  | beta galactofuranosyl glycosyltransferase, putative       | 0,646  | 0,002853   |
| TcCLB.506887.100 | protein kinase, putative                                  | 0,6459 | 0,0003173  |
| TcCLB.510565.40  | hypothetical protein                                      | 0,6458 | 0,00002833 |
| TcCLB.507615.110 | Present in the outer mitochondrial membrane proteome 3    | 0,6456 | 4,001E-06  |
| TcCLB.511815.70  | hypothetical protein, conserved                           | 0,6455 | 0,01075    |
| TcCLB.506063.31  | ATP-dependent DEAD/H RNA helicase (pseudogene), putat     | 0,6454 | 0,3009     |
| TcCLB.507959.80  | mucin-associated surface protein (MASP), putative         | 0,6453 | 0,04465    |
| TcCLB.505297.70  | mucin TcMUCII, putative                                   | 0,6451 | 0,01684    |
| TcCLB.506375.120 | hypothetical protein, conserved                           | 0,6449 | 2,412E-06  |
| TcCLB.511175.50  | mucin TcMUC (pseudogene), putative                        | 0,6446 | 0,00002312 |
| TcCLB.509817.50  | trans-sialidase, Group I, putative                        | 0,6446 | 0,02757    |
| TcCLB.506855.200 | hypothetical protein                                      | 0,6446 | 0,03983    |
| TcCLB.510349.64  | hypothetical protein, conserved                           | 0,6444 | 8,288E-06  |
| TcCLB.507517.80  | hypothetical protein, conserved                           | 0,6443 | 0,00008458 |
| TcCLB.510377.50  | trans-sialidase, Group V, putative                        | 0,6442 | 0,2854     |
| TcCLB.510643.190 | retrotransposon hot spot (RHS) protein, putative          | 0,6441 | 1,759E-08  |
| TcCLB.503483.9   | retrotransposon hot spot (RHS) protein, putative          | 0,644  | 1,986E-21  |
| TcCLB.507615.19  | microtubule-associated protein, putative, (fragment) (GB4 | 0,644  | 4,324E-13  |
| TcCLB.507153.40  | tryptophanyl-tRNA synthetase (pseudogene), putative       | 0,644  | 0,02752    |
| TcCLB.442427.10  | trans-sialidase (pseudogene), putative                    | 0,6439 | 0,005976   |
| TcCLB.508441.94  | mucin TcMUCII, putative                                   | 0,6438 | 0,005774   |
| TcCLB.511817.280 | hypothetical protein, conserved                           | 0,6437 | 4,355E-12  |
| TcCLB.507063.130 | protein kinase, putative                                  | 0,6436 | 4,329E-09  |
| TcCLB.503609.24  | mucin-associated surface protein (MASP, pseudogene), pu   | 0,6434 | 0,1597     |
| TcCLB.510803.19  | trans-sialidase, putative                                 | 0,6431 | 0,4943     |
| TcCLB.504077.50  | hypothetical protein, conserved                           | 0,643  | 7,419E-06  |
| TcCLB.511163.24  | hypothetical protein, conserved                           | 0,6426 | 0,001478   |
| TcCLB.510021.10  | mucin TcMUCII, putative                                   | 0,6426 | 0,2498     |
| TcCLB.511817.319 | hypothetical protein, conserved                           | 0,6424 | 0,0008133  |
| TcCLB.510655.60  | hypothetical protein, conserved                           | 0,6423 | 0,0001129  |
| TcCLB.510115.50  | retrotransposon hot spot protein (RHS, pseudogene), putat | 0,6419 | 0,00003807 |
| TcCLB.508919.70  | protein kinase, putative                                  | 0,6413 | 3,295E-09  |
| TcCLB.504277.20  | hypothetical protein                                      | 0,6411 | 0,0004399  |
| TcCLB.509029.90  | hypothetical protein, conserved                           | 0,6411 | 0,0005339  |
| TcCLB.510381.5   | SNF2 DNA repair protein (pseudogene), putative            | 0,6411 | 0,001418   |
| TcCLB.507079.30  | multidrug resistance protein E, putative                  | 0,6408 | 0,01428    |
| TcCLB.510857.10  | hypothetical protein, conserved                           | 0,6404 | 3,201E-08  |
| TcCLB.510483.224 | mucin TcMUCII (pseudogene), putative                      | 0,6403 | 0,2987     |
| TcCLB.507063.40  | hypothetical protein, conserved                           | 0,6398 | 0,0001012  |
| TcCLB.509745.40  | hypothetical protein, conserved                           | 0,6395 | 7,909E-07  |
| TcCLB.510021.30  | mucin TcMUCII, putative                                   | 0,6394 | 0,3469     |
| TcCLB.510435.10  | hypothetical protein, conserved                           | 0,6393 | 0,001701   |
| TcCLB.511613.40  | mucin-associated surface protein (MASP), putative         | 0,6393 | 0,06539    |

|                  |                                                               |        |            |
|------------------|---------------------------------------------------------------|--------|------------|
| TcCLB.506401.240 | hypothetical protein, conserved                               | 0,6391 | 1,842E-12  |
| TcCLB.504115.110 | trans-sialidase (pseudogene), putative                        | 0,6391 | 0,006605   |
| TcCLB.509995.20  | hypothetical protein, conserved                               | 0,6386 | 2,227E-08  |
| TcCLB.508415.30  | hypothetical protein                                          | 0,6385 | 8,548E-08  |
| TcCLB.507087.14  | hypothetical protein, conserved                               | 0,6385 | 0,02489    |
| TcCLB.506067.169 | mucin-associated surface protein (MASP), putative             | 0,6385 | 0,1666     |
| TcCLB.511089.10  | mucin-associated surface protein (MASP), putative             | 0,6377 | 0,442      |
| TcCLB.505115.20  | hypothetical protein                                          | 0,6374 | 0,1535     |
| TcCLB.509735.70  | retrotransposon hot spot protein (RHS, pseudogene), putative  | 0,6373 | 3,876E-07  |
| TcCLB.508719.20  | hypothetical protein, conserved                               | 0,6373 | 0,0004819  |
| TcCLB.506129.89  | hypothetical protein, conserved                               | 0,6372 | 8,91E-11   |
| TcCLB.511317.60  | hypothetical protein, conserved                               | 0,6371 | 0,004851   |
| TcCLB.508125.140 | mucin-associated surface protein (MASP), putative             | 0,6371 | 0,1587     |
| TcCLB.506357.199 | hypothetical protein, conserved                               | 0,6369 | 2,501E-09  |
| TcCLB.507653.110 | trans-sialidase (pseudogene), putative                        | 0,6368 | 0,0000613  |
| TcCLB.511817.130 | hypothetical protein, conserved                               | 0,6366 | 0,0005261  |
| TcCLB.508515.40  | protein kinase, putative                                      | 0,6364 | 0,00169    |
| TcCLB.503613.20  | proteasome alpha 7 subunit, putative                          | 0,6362 | 3,699E-07  |
| TcCLB.511733.90  | hypothetical protein, conserved                               | 0,6361 | 0,00003359 |
| TcCLB.510773.110 | hypothetical protein, conserved                               | 0,6361 | 0,001317   |
| TcCLB.506595.70  | trans-sialidase (pseudogene), putative                        | 0,6361 | 0,002336   |
| TcCLB.506321.120 | mucin-associated surface protein (MASP), putative             | 0,6361 | 0,003751   |
| TcCLB.508499.39  | trans-sialidase (pseudogene), putative                        | 0,636  | 0,0769     |
| TcCLB.506357.10  | hypothetical protein, conserved                               | 0,6359 | 0,0004431  |
| TcCLB.509443.39  | hypothetical protein, conserved                               | 0,6359 | 0,002222   |
| TcCLB.509161.60  | hypothetical protein, conserved                               | 0,6358 | 2,312E-08  |
| TcCLB.507173.30  | mucin-associated surface protein (MASP, pseudogene), putative | 0,6356 | 0,1202     |
| TcCLB.506401.280 | hypothetical protein, conserved                               | 0,6353 | 6,675E-07  |
| TcCLB.504081.342 | hypothetical protein (pseudogene)                             | 0,6353 | 0,3137     |
| TcCLB.506627.130 | dispersed gene family protein 1 (DGF-1, pseudogene), putative | 0,635  | 0,1076     |
| TcCLB.511001.60  | protein kinase, putative                                      | 0,6349 | 7,163E-06  |
| TcCLB.506147.110 | hypothetical protein, conserved                               | 0,6348 | 8,528E-08  |
| TcCLB.509203.14  | hypothetical protein                                          | 0,6348 | 0,0178     |
| TcCLB.506335.55  | elongation factor 1-gamma (EF-1-gamma, pseudogene), putative  | 0,6346 | 0,05217    |
| TcCLB.399373.9   | retrotransposon hot spot (RHS) protein, putative (fragment)   | 0,6342 | 4,336E-08  |
| TcCLB.511581.10  | fatty acyl CoA synthetase 2, putative                         | 0,6342 | 0,0001391  |
| TcCLB.507071.20  | mucin-associated surface protein (MASP), putative             | 0,6342 | 0,06866    |
| TcCLB.511391.10  | retrotransposon hot spot protein (RHS, pseudogene), putative  | 0,6338 | 1,063E-10  |
| TcCLB.507905.39  | mucin-associated surface protein (MASP), putative             | 0,6337 | 1,211E-08  |
| TcCLB.506001.50  | mucin-associated surface protein (MASP), putative             | 0,6337 | 0,009844   |
| TcCLB.503973.57  | mucin TcMUCII (pseudogene), putative                          | 0,6336 | 0,1871     |
| TcCLB.503789.60  | hypothetical protein, conserved                               | 0,6335 | 4,495E-06  |
| TcCLB.507627.20  | proton motive ATPase 1, putative                              | 0,6333 | 1,159E-09  |
| TcCLB.510105.200 | hypothetical protein, conserved                               | 0,6331 | 1,069E-14  |
| TcCLB.508619.10  | retrotransposon hot spot protein (RHS, pseudogene), putative  | 0,633  | 5,194E-06  |

|                  |                                                               |        |            |
|------------------|---------------------------------------------------------------|--------|------------|
| TcCLB.506843.50  | glycine dehydrogenase [decarboxylating] (pseudogene), pu      | 0,6327 | 0,1199     |
| TcCLB.511281.20  | transporter, putative                                         | 0,6325 | 1,596E-07  |
| TcCLB.504431.50  | hypothetical protein, conserved                               | 0,6324 | 5,69E-08   |
| TcCLB.509141.30  | hypothetical protein                                          | 0,6323 | 0,0002022  |
| TcCLB.507885.10  | RNA-binding protein, putative                                 | 0,6322 | 0,001236   |
| TcCLB.509717.9   | hypothetical protein (pseudogene)                             | 0,6322 | 0,03908    |
| TcCLB.503901.9   | hypothetical protein, conserved (pseudogene)                  | 0,6321 | 0,0006682  |
| TcCLB.504003.50  | hypothetical protein, conserved                               | 0,632  | 0,0006914  |
| TcCLB.507505.10  | trans-sialidase, putative                                     | 0,632  | 0,3792     |
| TcCLB.506801.50  | surface protease GP63 (pseudogene), putative                  | 0,6318 | 0,00314    |
| TcCLB.510149.120 | flagellar radial spoke protein-like, putative                 | 0,6316 | 1,185E-06  |
| TcCLB.504427.120 | hypothetical protein, conserved                               | 0,6312 | 0,00004191 |
| TcCLB.511863.4   | retrotransposon hot spot (RHS) protein, putative (fragment)   | 0,6312 | 0,00008551 |
| TcCLB.509029.60  | hypothetical protein, conserved                               | 0,6311 | 2,298E-12  |
| TcCLB.508351.40  | cytochrome c oxidase assembly factor, putative                | 0,6311 | 0,00003175 |
| TcCLB.511173.360 | mucin-associated surface protein (MASP), putative             | 0,631  | 0,1253     |
| TcCLB.508087.10  | hypothetical protein                                          | 0,6308 | 0,00003535 |
| TcCLB.504797.120 | hypothetical protein, conserved                               | 0,6307 | 0,0005469  |
| TcCLB.503909.90  | hypothetical protein                                          | 0,6305 | 0,00191    |
| TcCLB.509667.31  | hypothetical protein, conserved (pseudogene)                  | 0,6303 | 0,03854    |
| TcCLB.509611.80  | cation-transporting ATPase, putative                          | 0,6299 | 3,731E-14  |
| TcCLB.507911.15  | retrotransposon hot spot protein (RHS, pseudogene), putative  | 0,6291 | 0,02719    |
| TcCLB.510555.41  | hypothetical protein, conserved (pseudogene)                  | 0,6291 | 0,2251     |
| TcCLB.510651.20  | hypothetical protein, conserved                               | 0,629  | 0,0007595  |
| TcCLB.509735.150 | retrotransposon hot spot protein (RHS, pseudogene), putative  | 0,6289 | 1,703E-07  |
| TcCLB.508161.10  | mucin-associated surface protein (MASP), putative             | 0,6289 | 0,374      |
| TcCLB.510699.110 | retrotransposon hot spot protein (RHS, pseudogene), putative  | 0,6288 | 0,003159   |
| TcCLB.506717.30  | dispersed gene family protein 1 (DGF-1, pseudogene), putative | 0,6287 | 0,005963   |
| TcCLB.506885.180 | hypothetical protein, conserved                               | 0,6286 | 1,493E-06  |
| TcCLB.506357.170 | serine/threonine protein phosphatase, putative                | 0,6286 | 0,00009842 |
| TcCLB.503893.30  | hypothetical protein, conserved                               | 0,6284 | 4,325E-06  |
| TcCLB.506435.410 | uracil phosphoribosyltransferase, putative                    | 0,6283 | 1,239E-07  |
| TcCLB.508815.130 | hypothetical protein, conserved                               | 0,6281 | 1,492E-09  |
| TcCLB.504119.29  | deoxyhypusine synthase, putative                              | 0,6281 | 1,772E-07  |
| TcCLB.506267.60  | mucin TcMUCII, putative                                       | 0,628  | 0,2265     |
| TcCLB.506763.40  | hypothetical protein                                          | 0,628  | 0,2616     |
| TcCLB.509581.35  | hypothetical protein, conserved (pseudogene)                  | 0,628  | 0,4064     |
| TcCLB.504155.150 | surface protease GP63, putative                               | 0,6278 | 0,01849    |
| TcCLB.510611.60  | nitroreductase                                                | 0,6276 | 3,802E-06  |
| TcCLB.506859.10  | ubiquitin-conjugating enzyme E2, putative                     | 0,6276 | 8,549E-06  |
| TcCLB.508515.50  | glycogenin glucosyltransferase, putative                      | 0,6272 | 0,001446   |
| TcCLB.510155.60  | hypothetical protein, conserved                               | 0,6271 | 0,00005826 |
| TcCLB.430737.20  | hypothetical protein, conserved (fragment)                    | 0,6268 | 0,00225    |
| TcCLB.511875.29  | mucin-associated surface protein (MASP, pseudogene), putative | 0,6268 | 0,01784    |
| TcCLB.503823.84  | DNA-directed RNA polymerase I subunit, putative               | 0,6267 | 0,0001424  |

|                  |                                                           |        |            |
|------------------|-----------------------------------------------------------|--------|------------|
| TcCLB.508539.80  | mucin-associated surface protein (MASP), putative         | 0,6267 | 0,03996    |
| TcCLB.511469.40  | hypothetical protein, conserved                           | 0,6263 | 2,447E-09  |
| TcCLB.510851.40  | trans-sialidase (pseudogene), putative                    | 0,6263 | 0,002138   |
| TcCLB.507167.169 | dispersed gene family protein 1 (DGF-1), putative         | 0,6263 | 0,002821   |
| TcCLB.511809.130 | 40S ribosomal protein S15, putative                       | 0,6262 | 7,662E-06  |
| TcCLB.508261.50  | mucin-associated surface protein (MASP), putative         | 0,6258 | 0,2399     |
| TcCLB.504149.130 | hypothetical protein, conserved                           | 0,6254 | 1,157E-13  |
| TcCLB.504099.10  | retrotransposon hot spot (RHS) protein, putative          | 0,6254 | 0,0001507  |
| TcCLB.507959.180 | surface protease GP63 (pseudogene), putative              | 0,6254 | 0,27       |
| TcCLB.509905.100 | retrotransposon hot spot protein (RHS, pseudogene), putat | 0,625  | 0,00002559 |
| TcCLB.510089.170 | casein kinase I, putative                                 | 0,6248 | 0,0004468  |
| TcCLB.506559.434 | hypothetical protein, conserved                           | 0,6247 | 0,0000139  |
| TcCLB.504001.3   | flagellar radial spoke component, putative (fragment)     | 0,6246 | 0,000641   |
| TcCLB.511625.149 | mucin TcMUCII (pseudogene), putative                      | 0,6246 | 0,2332     |
| TcCLB.504035.120 | hypothetical protein, conserved                           | 0,6245 | 3,89E-10   |
| TcCLB.506991.10  | hypothetical protein, conserved                           | 0,6245 | 7,576E-06  |
| TcCLB.506975.63  | hypothetical protein, conserved                           | 0,6244 | 0,0001861  |
| TcCLB.510153.10  | hypothetical protein, conserved                           | 0,6241 | 4,036E-07  |
| TcCLB.508567.89  | hypothetical protein, conserved                           | 0,6239 | 0,00000312 |
| TcCLB.506501.50  | mucin-associated surface protein (MASP, pseudogene), pu   | 0,6239 | 0,313      |
| TcCLB.508377.9   | fucose kinase, putative (fragment)                        | 0,6238 | 2,419E-07  |
| TcCLB.509965.310 | hypothetical protein, conserved (pseudogene)              | 0,6237 | 1,207E-07  |
| TcCLB.507507.40  | ubiquitin hydrolase, putative                             | 0,6233 | 0,001381   |
| TcCLB.510275.370 | mucin-associated surface protein (MASP), putative         | 0,6231 | 0,04055    |
| TcCLB.511131.30  | hypothetical protein, conserved                           | 0,623  | 4,173E-09  |
| TcCLB.506769.65  | trans-sialidase (pseudogene), putative                    | 0,6229 | 0,5472     |
| TcCLB.506959.110 | hypothetical protein, conserved                           | 0,6226 | 4,566E-07  |
| TcCLB.510357.100 | hypothetical protein, conserved                           | 0,6226 | 0,00002434 |
| TcCLB.506487.50  | trans-sialidase (pseudogene), putative                    | 0,6226 | 0,001317   |
| TcCLB.507649.90  | hypothetical protein, conserved                           | 0,6222 | 5,066E-08  |
| TcCLB.509127.90  | hypothetical protein, conserved                           | 0,6222 | 0,00000115 |
| TcCLB.505171.30  | hypothetical protein, conserved                           | 0,622  | 7,168E-08  |
| TcCLB.397923.10  | mucin-associated surface protein (MASP), putative         | 0,622  | 0,1237     |
| TcCLB.508521.20  | trans-sialidase, Group VIII, putative                     | 0,6219 | 0,01974    |
| TcCLB.504147.160 | ADP-ribosylation factor-like protein, putative            | 0,6217 | 8,738E-08  |
| TcCLB.506207.50  | translationally controlled tumor protein (TCTP), putative | 0,6216 | 6,32E-19   |
| TcCLB.509059.30  | calcium-binding protein, putative                         | 0,6213 | 0,0003869  |
| TcCLB.508741.360 | hypothetical protein, conserved                           | 0,6212 | 3,065E-07  |
| TcCLB.503717.50  | mucin TcMUCII (pseudogene), putative                      | 0,6212 | 0,1554     |
| TcCLB.508739.70  | protein kinase, putative                                  | 0,6211 | 8,036E-19  |
| TcCLB.509231.23  | hypothetical protein, conserved                           | 0,621  | 4,444E-07  |
| TcCLB.508221.920 | mucin-associated surface protein (MASP, pseudogene), pu   | 0,6209 | 0,0533     |
| TcCLB.509805.230 | hypothetical protein, conserved                           | 0,6204 | 0,001005   |
| TcCLB.511245.230 | hypothetical protein, conserved                           | 0,6201 | 2,402E-06  |
| TcCLB.503947.11  | surface protease GP63, putative (fragment)                | 0,6201 | 0,2494     |

|                  |                                                                  |        |            |
|------------------|------------------------------------------------------------------|--------|------------|
| TcCLB.468041.30  | retrotransposon hot spot protein (RHS, pseudogene), putative     | 0,6196 | 3,264E-10  |
| TcCLB.504077.30  | hypothetical protein, conserved                                  | 0,6194 | 2,375E-06  |
| TcCLB.510643.90  | mucin-associated surface protein (MASP, pseudogene), putative    | 0,6193 | 0,007608   |
| TcCLB.509581.5   | retrotransposon hot spot (RHS) protein, putative (fragment)      | 0,6189 | 0,008961   |
| TcCLB.510377.150 | mucin TcMUCII, putative                                          | 0,6188 | 0,5623     |
| TcCLB.508375.30  | aspartate carbamoyltransferase, putative                         | 0,6187 | 1,403E-06  |
| TcCLB.509295.90  | hypothetical protein                                             | 0,6187 | 0,004884   |
| TcCLB.506471.30  | trans-sialidase, Group II, putative                              | 0,6185 | 0,0006034  |
| TcCLB.510299.40  | hypothetical protein, conserved                                  | 0,6183 | 1,344E-06  |
| TcCLB.510753.20  | hypothetical protein, conserved                                  | 0,6182 | 0,00006146 |
| TcCLB.507091.120 | mucin-associated surface protein (MASP), putative                | 0,6178 | 0,3881     |
| TcCLB.503467.20  | hypothetical protein, conserved                                  | 0,6177 | 9,718E-08  |
| TcCLB.509769.66  | hypothetical protein, conserved                                  | 0,6177 | 0,00008586 |
| TcCLB.508781.80  | hypothetical protein, conserved                                  | 0,6174 | 1,512E-06  |
| TcCLB.422955.10  | hypothetical protein, conserved (pseudogene)                     | 0,6174 | 4,086E-06  |
| TcCLB.504741.4   | hypothetical protein, conserved                                  | 0,6173 | 1,993E-06  |
| TcCLB.507487.10  | mucin TcMUCII, putative                                          | 0,6173 | 0,2345     |
| TcCLB.503977.40  | mucin TcMUCII, putative                                          | 0,6173 | 0,267      |
| TcCLB.510525.130 | Present in the outer mitochondrial membrane proteome 3           | 0,6172 | 6,482E-07  |
| TcCLB.503689.10  | small GTP-binding protein Rab7, putative                         | 0,6169 | 0,0000518  |
| TcCLB.508207.240 | C-1-tetrahydrofolate synthase, cytoplasmic, putative             | 0,6166 | 3,348E-06  |
| TcCLB.503613.79  | hypothetical protein                                             | 0,6166 | 0,0006008  |
| TcCLB.511733.10  | aldehyde dehydrogenase, putative                                 | 0,6165 | 4,432E-07  |
| TcCLB.510731.90  | protein kinase, putative                                         | 0,6164 | 0,0007961  |
| TcCLB.509545.40  | trans-sialidase (pseudogene), putative                           | 0,6163 | 0,04675    |
| TcCLB.507053.160 | hypothetical protein, conserved                                  | 0,6161 | 1,198E-12  |
| TcCLB.504081.420 | mucin-associated surface protein (MASP), putative                | 0,616  | 0,327      |
| TcCLB.458153.10  | serine/threonine protein phosphatase, putative (fragment)        | 0,6156 | 0,00894    |
| TcCLB.510101.70  | protein transport protein SEC61 subunit alpha, putative          | 0,6155 | 1,633E-12  |
| TcCLB.508173.70  | hypothetical protein, conserved                                  | 0,6155 | 5,717E-07  |
| TcCLB.511517.164 | hypothetical protein, conserved                                  | 0,6155 | 0,00004522 |
| TcCLB.507639.20  | universal minicircle sequence binding protein, putative (UM)     | 0,6154 | 0,0004408  |
| TcCLB.508317.80  | mannosyl-oligosaccharide 1,2-alpha-mannosidase IB, putative      | 0,6151 | 5,282E-08  |
| TcCLB.506599.395 | elongation factor 1-gamma (EF-1-gamma, pseudogene), putative     | 0,6149 | 0,2708     |
| TcCLB.507809.30  | ribose-phosphate pyrophosphokinase, putative                     | 0,6148 | 2,409E-11  |
| TcCLB.509569.140 | hypothetical protein, conserved                                  | 0,6146 | 1,041E-07  |
| TcCLB.507739.50  | hypothetical protein, conserved                                  | 0,6146 | 0,004166   |
| TcCLB.508909.10  | OSM3-like kinesin, putative                                      | 0,6145 | 5,185E-08  |
| TcCLB.507787.80  | hypothetical protein, conserved                                  | 0,6145 | 0,0009311  |
| TcCLB.503635.20  | hypothetical protein, conserved                                  | 0,614  | 0,00001235 |
| TcCLB.510797.39  | hypothetical protein, conserved                                  | 0,6135 | 0,0002134  |
| TcCLB.420293.40  | beta galactofuranosyl glycosyltransferase (pseudogene), putative | 0,6135 | 0,006641   |
| TcCLB.511303.40  | carnitine O-acetyltransferase, putative                          | 0,6134 | 6,236E-06  |
| TcCLB.509769.90  | mitochondrial carrier protein, putative                          | 0,6133 | 5,011E-07  |
| TcCLB.511603.110 | mucin TcMUCII, putative                                          | 0,6133 | 0,3695     |

|                  |                                                             |        |            |
|------------------|-------------------------------------------------------------|--------|------------|
| TcCLB.506417.60  | terbinafine resistance locus protein (yip1), putative       | 0,6129 | 1,107E-06  |
| TcCLB.509599.157 | serine/threonine protein kinase, putative                   | 0,6128 | 8,852E-07  |
| TcCLB.506375.50  | dispersed gene family protein 1 (DGF-1), putative           | 0,6128 | 0,0009623  |
| TcCLB.506951.60  | mucin-associated surface protein (MASP), putative           | 0,6126 | 0,009825   |
| TcCLB.511899.40  | 2-amino-3-ketobutyrate coenzyme A ligase, putative          | 0,6123 | 2,118E-07  |
| TcCLB.506595.104 | ribosomal P protein AGP2beta-1, putative                    | 0,6123 | 0,009768   |
| TcCLB.507723.30  | retrotransposon hot spot protein (RHS, pseudogene), putat   | 0,6122 | 0,00005466 |
| TcCLB.511771.75  | hypothetical protein                                        | 0,6122 | 0,02998    |
| TcCLB.511807.160 | hypothetical protein, conserved                             | 0,6121 | 0,0008438  |
| TcCLB.505971.20  | hypothetical protein                                        | 0,6118 | 0,0117     |
| TcCLB.503995.40  | hypothetical protein, conserved                             | 0,6117 | 0,0004151  |
| TcCLB.511755.19  | hypothetical protein, conserved                             | 0,6117 | 0,08112    |
| TcCLB.510271.30  | trans-sialidase (pseudogene), putative                      | 0,6113 | 0,05156    |
| TcCLB.511217.120 | peptidyl-prolyl cis-trans isomerase, putative               | 0,6108 | 0,0001202  |
| TcCLB.507899.10  | retrotransposon hot spot protein (RHS, pseudogene), putat   | 0,6108 | 0,0004162  |
| TcCLB.510371.50  | mucin-associated surface protein (MASP), putative           | 0,6107 | 0,1233     |
| TcCLB.509967.40  | hypothetical protein, conserved                             | 0,6106 | 9,689E-06  |
| TcCLB.510409.10  | protein kinase, putative                                    | 0,6106 | 0,05804    |
| TcCLB.509525.234 | mucin TcMUCII, putative                                     | 0,6105 | 0,2997     |
| TcCLB.506705.20  | adenosine kinase, putative                                  | 0,6104 | 0,002212   |
| TcCLB.506025.60  | 2-oxoglutarate dehydrogenase, E2 component, dihydrolipo:    | 0,6101 | 2,656E-11  |
| TcCLB.510021.80  | 90 kDa surface protein, putative                            | 0,6096 | 0,2119     |
| TcCLB.511863.20  | hypothetical protein, conserved                             | 0,6093 | 0,0000012  |
| TcCLB.506265.140 | hypothetical protein, conserved                             | 0,6093 | 0,00005174 |
| TcCLB.508379.10  | fucose kinase, putative                                     | 0,6093 | 0,003054   |
| TcCLB.506759.31  | surface protease GP63 (pseudogene), putative                | 0,6093 | 0,1394     |
| TcCLB.506999.160 | hypothetical protein                                        | 0,6086 | 0,02137    |
| TcCLB.511727.310 | Leucine-rich repeat-containing protein ODA7 (ODA7)          | 0,6083 | 1,978E-07  |
| TcCLB.510997.40  | enoyl-CoA hydratase/isomerase family protein, putative      | 0,6083 | 3,307E-07  |
| TcCLB.510533.180 | microtubule-associated protein 1A/1B, light chain 3, putati | 0,6082 | 0,03129    |
| TcCLB.504975.10  | mucin-associated surface protein (MASP, pseudogene), pu     | 0,6081 | 0,1558     |
| TcCLB.511575.110 | hypothetical protein, conserved                             | 0,6076 | 4,873E-08  |
| TcCLB.508731.50  | dynein light chain Tctex-type, putative                     | 0,6074 | 0,0005364  |
| TcCLB.509259.123 | hypothetical protein (pseudogene)                           | 0,6073 | 0,007395   |
| TcCLB.509217.170 | hypothetical protein                                        | 0,6073 | 0,1885     |
| TcCLB.510933.20  | mucin-associated surface protein (MASP), putative           | 0,6073 | 0,1934     |
| TcCLB.503903.60  | hypothetical protein, conserved                             | 0,6072 | 2,734E-08  |
| TcCLB.506821.80  | hypothetical protein, conserved                             | 0,6069 | 0,007273   |
| TcCLB.506331.104 | retrotransposon hot spot protein (RHS, pseudogene), putat   | 0,6069 | 0,009033   |
| TcCLB.506911.30  | trans-sialidase, Group V, putative                          | 0,6069 | 0,03298    |
| TcCLB.508641.100 | hypothetical protein, conserved                             | 0,6067 | 1,392E-06  |
| TcCLB.503507.50  | mucin TcMUCII, putative                                     | 0,6064 | 0,2508     |
| TcCLB.510395.30  | GTPase, putative                                            | 0,6061 | 0,000122   |
| TcCLB.510361.90  | surface protease GP63, putative                             | 0,606  | 0,1631     |
| TcCLB.506159.5   | trans-sialidase, putative (fragment)                        | 0,6059 | 0,4524     |

|                  |                                                              |        |            |
|------------------|--------------------------------------------------------------|--------|------------|
| TcCLB.503619.10  | meiotic recombination protein SPO11, putative                | 0,6056 | 0,01041    |
| TcCLB.507995.20  | trans-sialidase, putative                                    | 0,6056 | 0,2455     |
| TcCLB.508879.150 | hypothetical protein, conserved                              | 0,6054 | 0,000298   |
| TcCLB.424383.9   | trans-sialidase (pseudogene), putative                       | 0,6053 | 0,06162    |
| TcCLB.509519.9   | dispersed gene family protein 1 (DGF-1), putative (fragme    | 0,6052 | 0,3375     |
| TcCLB.511089.140 | mucin-associated surface protein (MASP), putative            | 0,605  | 0,1933     |
| TcCLB.509889.9   | dispersed gene family protein 1 (DGF-1), putative            | 0,6049 | 0,04943    |
| TcCLB.508879.110 | hypothetical protein, conserved                              | 0,6048 | 2,664E-06  |
| TcCLB.508293.120 | hypothetical protein                                         | 0,6048 | 0,2652     |
| TcCLB.508893.30  | hypothetical protein, conserved                              | 0,6047 | 0,002264   |
| TcCLB.510323.50  | hypothetical protein, conserved                              | 0,6046 | 0,0006426  |
| TcCLB.507167.50  | hypothetical protein, conserved (pseudogene)                 | 0,6046 | 0,001195   |
| TcCLB.503429.39  | trans-sialidase, putative                                    | 0,604  | 0,2285     |
| TcCLB.506801.120 | protein kinase, putative                                     | 0,6039 | 3,927E-06  |
| TcCLB.503599.70  | hypothetical protein, conserved                              | 0,6039 | 0,0002041  |
| TcCLB.457547.9   | dispersed gene family protein 1 (DGF-1), putative            | 0,6037 | 0,04108    |
| TcCLB.506777.120 | protein kinase, putative                                     | 0,6035 | 0,000107   |
| TcCLB.508859.20  | hypothetical protein, conserved                              | 0,6035 | 0,0004996  |
| TcCLB.506579.119 | hypothetical protein, conserved                              | 0,6034 | 0,02778    |
| TcCLB.510345.20  | hypothetical protein                                         | 0,6032 | 0,005239   |
| TcCLB.507497.20  | retrotransposon hot spot protein (RHS, pseudogene), putat    | 0,6032 | 0,07597    |
| TcCLB.507233.10  | trans-sialidase, Group III, putative                         | 0,6032 | 0,2037     |
| TcCLB.510259.40  | hypothetical protein, conserved                              | 0,6031 | 0,02822    |
| TcCLB.506213.90  | hypothetical protein, conserved                              | 0,603  | 1,229E-06  |
| TcCLB.506563.200 | calpain cysteine peptidase, putative                         | 0,6029 | 3,172E-09  |
| TcCLB.508305.50  | mucin-associated surface protein (MASP), putative            | 0,6025 | 0,1259     |
| TcCLB.506761.11  | mucin-associated surface protein (MASP), putative (fragm     | 0,6024 | 0,4611     |
| TcCLB.510863.20  | hypothetical protein                                         | 0,602  | 3,174E-06  |
| TcCLB.506741.80  | mucin TcMUCII, putative                                      | 0,602  | 0,4637     |
| TcCLB.504029.101 | hypothetical protein, conserved                              | 0,6019 | 0,0001832  |
| TcCLB.507093.44  | dynein light chain, putative                                 | 0,6018 | 0,001087   |
| TcCLB.509629.10  | trans-sialidase, Group III, putative                         | 0,6014 | 0,1415     |
| TcCLB.508971.10  | UDP-Gal or UDP-GlcNAc-dependent glycosyltransferase, pi      | 0,6012 | 0,002009   |
| TcCLB.510155.180 | eukaryotic initiation factor 4a, putative                    | 0,6011 | 4,44E-11   |
| TcCLB.507653.40  | dispersed gene family protein 1 (DGF-1), putative            | 0,6008 | 0,009234   |
| TcCLB.511817.240 | hypothetical protein, conserved                              | 0,6006 | 0,00002935 |
| TcCLB.510307.284 | trans-sialidase, Group IV, putative                          | 0,6005 | 0,00000617 |
| TcCLB.506605.210 | leucine-rich repeat protein (LRRP), putative                 | 0,6004 | 4,972E-08  |
| TcCLB.511711.80  | Ras-related protein RAB2B, putative (RAB2B)                  | 0,6    | 4,084E-06  |
| TcCLB.511873.30  | trans-sialidase (pseudogene), putative                       | 0,6    | 0,004525   |
| TcCLB.508461.210 | hypothetical protein, conserved                              | 0,5999 | 3,598E-06  |
| TcCLB.510861.80  | hypothetical protein                                         | 0,5999 | 0,00009578 |
| TcCLB.511023.19  | Tetratricopeptide-like helical domain containing protein (fi | 0,5999 | 0,0004901  |
| TcCLB.408547.10  | mucin-associated surface protein (MASP), putative            | 0,5998 | 0,1288     |
| TcCLB.510187.370 | hypothetical protein, conserved                              | 0,5997 | 0,0008817  |



|                  |                                                               |        |            |
|------------------|---------------------------------------------------------------|--------|------------|
| TcCLB.511821.30  | Mu-adaptin 1, putative                                        | 0,5996 | 1,364E-06  |
| TcCLB.506193.70  | glucose-6-phosphate dehydrogenase (pseudogene), putative      | 0,5996 | 0,00003261 |
| TcCLB.506763.234 | mucin-associated surface protein (MASP, pseudogene), putative | 0,5996 | 0,1918     |
| TcCLB.503899.110 | glutathione peroxidase-like protein, putative                 | 0,5994 | 0,00000542 |
| TcCLB.510101.480 | hypothetical protein, conserved                               | 0,5991 | 0,00002179 |
| TcCLB.504031.30  | mucin-associated surface protein (MASP), putative             | 0,5991 | 0,06304    |
| TcCLB.506851.20  | choline dehydrogenase, putative                               | 0,599  | 1,542E-09  |
| TcCLB.407477.10  | thiolase protein-like protein, putative                       | 0,599  | 0,00001597 |
| TcCLB.511191.19  | ras-related protein Rab21, putative                           | 0,5989 | 3,087E-06  |
| TcCLB.511693.100 | long-chain-fatty-acid-CoA ligase, putative                    | 0,5988 | 1,171E-09  |
| TcCLB.511817.310 | hypothetical protein, conserved                               | 0,5986 | 9,693E-10  |
| TcCLB.508785.10  | Present in the outer mitochondrial membrane proteome 1'       | 0,5986 | 0,00002898 |
| TcCLB.509857.20  | hypothetical protein, conserved                               | 0,5986 | 0,00004631 |
| TcCLB.510349.40  | hypothetical protein, conserved                               | 0,5985 | 2,251E-11  |
| TcCLB.510853.40  | trans-sialidase, Group IV, putative                           | 0,5982 | 0,00004983 |
| TcCLB.508899.100 | hypothetical protein, conserved                               | 0,5982 | 0,001483   |
| TcCLB.508441.30  | protein kinase, putative                                      | 0,5978 | 0,01149    |
| TcCLB.509993.60  | mucin TcMUCL, putative                                        | 0,5978 | 0,2801     |
| TcCLB.506035.10  | retrotransposon hot spot protein (RHS, pseudogene), putative  | 0,5977 | 0,0001414  |
| TcCLB.507275.10  | protein kinase, putative                                      | 0,5977 | 0,001573   |
| TcCLB.507121.11  | trans-sialidase, putative (fragment)                          | 0,5976 | 0,3623     |
| TcCLB.506895.40  | Kinesin-13 1, putative (KIN13-1)                              | 0,5975 | 2,091E-08  |
| TcCLB.506763.280 | mucin-associated surface protein (MASP), putative             | 0,5975 | 0,07502    |
| TcCLB.506773.170 | hypothetical protein, conserved                               | 0,5974 | 3,901E-06  |
| TcCLB.504201.40  | mucin-associated surface protein (MASP), putative             | 0,5974 | 0,1738     |
| TcCLB.511843.90  | hypothetical protein, conserved (pseudogene)                  | 0,5973 | 0,006224   |
| TcCLB.504239.434 | trans-sialidase, putative (fragment)                          | 0,5973 | 0,3563     |
| TcCLB.507609.150 | hypothetical protein (pseudogene)                             | 0,5972 | 0,07814    |
| TcCLB.509917.19  | retrotransposon hot spot (RHS) protein, putative (fragment)   | 0,5971 | 1,158E-10  |
| TcCLB.506041.50  | cytochrome c oxidase assembly protein, putative               | 0,5969 | 0,00008529 |
| TcCLB.508993.10  | cytidine triphosphate synthase, putative                      | 0,5968 | 2,302E-11  |
| TcCLB.510993.19  | hypothetical protein                                          | 0,5968 | 0,00744    |
| TcCLB.506269.45  | trans-sialidase (pseudogene), putative                        | 0,5967 | 0,4309     |
| TcCLB.508501.310 | hypothetical protein, conserved                               | 0,5966 | 3,254E-06  |
| TcCLB.506599.100 | mucin-associated surface protein (MASP), putative             | 0,5965 | 0,2707     |
| TcCLB.506499.10  | hypothetical protein, conserved (pseudogene)                  | 0,5964 | 0,4616     |
| TcCLB.506323.10  | dispersed gene family protein 1 (DGF-1, pseudogene), putative | 0,5963 | 0,002914   |
| TcCLB.503677.4   | hypothetical protein, conserved                               | 0,5961 | 0,2784     |
| TcCLB.511167.40  | hypothetical protein, conserved                               | 0,5959 | 0,003768   |
| TcCLB.506803.30  | retrotransposon hot spot protein (RHS, pseudogene), putative  | 0,5959 | 0,1061     |
| TcCLB.507993.290 | hypothetical protein, conserved                               | 0,5958 | 0,0003025  |
| TcCLB.508539.150 | surface protease GP63 (pseudogene), putative                  | 0,5958 | 0,1171     |
| TcCLB.507747.110 | mucin TcMUCII, putative                                       | 0,5957 | 0,1374     |
| TcCLB.510579.40  | hypothetical protein, conserved                               | 0,5955 | 0,000246   |
| TcCLB.508613.10  | hypothetical protein, conserved                               | 0,5951 | 3,95E-07   |

|                  |                                                           |        |            |
|------------------|-----------------------------------------------------------|--------|------------|
| TcCLB.511757.70  | trans-sialidase, Group II, putative                       | 0,5951 | 0,00522    |
| TcCLB.506147.80  | Present in the outer mitochondrial membrane proteome 6    | 0,5948 | 0,00001658 |
| TcCLB.507969.10  | vesicular transport-associated repeat protein, putative   | 0,5947 | 1,708E-09  |
| TcCLB.506527.4   | hypothetical protein, conserved (fragment)                | 0,5945 | 1,055E-06  |
| TcCLB.483183.10  | trans-sialidase, putative (fragment)                      | 0,5945 | 0,4009     |
| TcCLB.507317.50  | hypothetical protein, conserved                           | 0,5944 | 1,093E-08  |
| TcCLB.457101.10  | hypothetical protein, conserved                           | 0,5943 | 0,00000015 |
| TcCLB.510205.40  | trans-sialidase, Group V, putative                        | 0,5943 | 0,02884    |
| TcCLB.511539.9   | hypothetical protein, conserved                           | 0,5939 | 1,832E-07  |
| TcCLB.506679.80  | SNF1-related protein kinases, putative                    | 0,5936 | 3,077E-07  |
| TcCLB.506513.150 | hypothetical protein, conserved                           | 0,5936 | 0,0003816  |
| TcCLB.509537.70  | hypothetical protein, conserved                           | 0,5934 | 0,00004709 |
| TcCLB.506661.140 | hypothetical protein, conserved                           | 0,5931 | 1,236E-07  |
| TcCLB.507615.90  | hypothetical protein, conserved                           | 0,5928 | 5,701E-13  |
| TcCLB.507645.59  | hypothetical protein, conserved                           | 0,5928 | 0,006303   |
| TcCLB.510691.10  | 1,2-Dihydroxy-3-keto-5-methylthiopentene dioxygenase, pu  | 0,5927 | 7,803E-06  |
| TcCLB.506649.110 | hypothetical protein, conserved                           | 0,5927 | 0,004835   |
| TcCLB.510027.20  | transporter, putative                                     | 0,5926 | 0,0006066  |
| TcCLB.511077.160 | mucin TcMUCII, putative                                   | 0,5926 | 0,3361     |
| TcCLB.510575.220 | hypothetical protein, conserved                           | 0,5923 | 0,00006222 |
| TcCLB.509601.130 | hypothetical protein, conserved                           | 0,5922 | 0,00672    |
| TcCLB.511383.50  | prohibitin, putative                                      | 0,5918 | 3,756E-08  |
| TcCLB.505171.40  | hypothetical protein, conserved                           | 0,5917 | 0,00005633 |
| TcCLB.506757.129 | mucin-associated surface protein (MASP, pseudogene), pu   | 0,5917 | 0,01376    |
| TcCLB.511815.24  | hypothetical protein, conserved                           | 0,5915 | 2,232E-08  |
| TcCLB.433033.10  | retrotransposon hot spot protein (RHS, pseudogene), putat | 0,5914 | 0,0004043  |
| TcCLB.507071.250 | mucin TcMUCII, putative                                   | 0,5913 | 0,2949     |
| TcCLB.510079.49  | dispersed gene family protein 1 (DGF-1), putative (fragme | 0,591  | 0,01471    |
| TcCLB.503619.25  | hypothetical protein, conserved                           | 0,5908 | 0,003281   |
| TcCLB.504153.330 | hypothetical protein, conserved                           | 0,5907 | 2,075E-11  |
| TcCLB.510901.20  | hypothetical protein                                      | 0,5907 | 0,007484   |
| TcCLB.504039.130 | mucin-associated surface protein (MASP), putative         | 0,5905 | 0,2491     |
| TcCLB.510105.230 | glyceraldehyde 3-phosphate dehydrogenase, cytosolic, puta | 0,5904 | 0,00009824 |
| TcCLB.510421.60  | hypothetical protein, conserved                           | 0,5903 | 6,388E-06  |
| TcCLB.511181.50  | metallo-peptidase, Clan ME, Family M16                    | 0,5902 | 5,066E-11  |
| TcCLB.506595.120 | trans-sialidase (pseudogene), putative                    | 0,5901 | 0,0001283  |
| TcCLB.509797.60  | hypothetical protein                                      | 0,59   | 0,00002566 |
| TcCLB.506375.60  | tryptophanyl-tRNA synthetase, putative                    | 0,5899 | 0,0009714  |
| TcCLB.505267.20  | trans-sialidase (pseudogene), putative                    | 0,5899 | 0,133      |
| TcCLB.507681.50  | hypothetical protein, conserved                           | 0,5898 | 1,047E-09  |
| TcCLB.509217.140 | hypothetical protein, conserved (pseudogene)              | 0,5898 | 0,005427   |
| TcCLB.506675.90  | retrotransposon hot spot protein (RHS, pseudogene), putat | 0,5897 | 0,002804   |
| TcCLB.510085.50  | trans-sialidase (pseudogene), putative                    | 0,5897 | 0,1025     |
| TcCLB.508999.60  | mucin TcMUCII, putative                                   | 0,5897 | 0,1202     |
| TcCLB.509947.10  | mucin TcMUCII, putative                                   | 0,5895 | 0,05416    |

|                  |                                                           |        |            |
|------------------|-----------------------------------------------------------|--------|------------|
| TcCLB.507773.34  | 60S ribosomal protein L37, putative                       | 0,5894 | 3,289E-09  |
| TcCLB.506961.50  | dispersed gene family protein 1 (DGF-1), putative         | 0,5891 | 0,00005574 |
| TcCLB.506773.40  | 3-methylcrotonoyl-CoA carboxylase beta subunit, putative  | 0,5887 | 5,441E-13  |
| TcCLB.503763.30  | retrotransposon hot spot protein (RHS, pseudogene), putat | 0,5886 | 2,199E-08  |
| TcCLB.438059.10  | serine/threonine-protein phosphatase PP1 alpha            | 0,5886 | 0,00735    |
| TcCLB.511689.10  | hypothetical protein                                      | 0,5883 | 0,007293   |
| TcCLB.503899.130 | glutathione peroxidase-like protein, putative             | 0,5881 | 0,0004422  |
| TcCLB.510497.130 | retrotransposon hot spot protein (RHS, pseudogene), putat | 0,5878 | 0,009665   |
| TcCLB.508289.20  | mucin TcMUCII, putative                                   | 0,5877 | 0,5239     |
| TcCLB.422867.20  | retrotransposon hot spot protein (RHS, pseudogene), putat | 0,5876 | 0,000192   |
| TcCLB.504231.10  | hypothetical protein, conserved                           | 0,5872 | 7,316E-06  |
| TcCLB.511557.10  | serine peptidase, clan SC, family S9A-like protein (OPB)  | 0,5871 | 6,509E-12  |
| TcCLB.509419.49  | mucin-associated surface protein (MASP, pseudogene), pu   | 0,5871 | 0,4965     |
| TcCLB.511585.320 | retrotransposon hot spot (RHS) protein, putative          | 0,5869 | 5,281E-06  |
| TcCLB.510697.105 | hypothetical protein, conserved (pseudogene)              | 0,5866 | 0,1918     |
| TcCLB.511293.80  | hypothetical protein, conserved                           | 0,5862 | 0,0000435  |
| TcCLB.503829.10  | hypothetical protein, conserved                           | 0,5861 | 0,0007241  |
| TcCLB.510693.314 | mucin TcMUCII (pseudogene), putative                      | 0,5859 | 0,0539     |
| TcCLB.509151.120 | hypothetical protein, conserved                           | 0,5858 | 8,846E-07  |
| TcCLB.506765.74  | mucin-associated surface protein (MASP), putative         | 0,5857 | 0,2321     |
| TcCLB.509053.170 | DREV methyltransferase, putative                          | 0,5856 | 0,0000656  |
| TcCLB.511769.10  | hypothetical protein                                      | 0,5856 | 0,02413    |
| TcCLB.511211.200 | hypothetical protein, conserved                           | 0,5855 | 5,971E-06  |
| TcCLB.507491.90  | protein kinase, putative                                  | 0,5853 | 0,0004576  |
| TcCLB.508221.780 | hypothetical protein                                      | 0,5852 | 0,1098     |
| TcCLB.511871.60  | hypothetical protein, conserved (pseudogene)              | 0,5846 | 0,00005941 |
| TcCLB.506885.124 | Enriched in surface-labeled proteome protein 19 (SLS3)    | 0,5842 | 5,148E-06  |
| TcCLB.506825.219 | hypothetical protein, conserved                           | 0,584  | 2,23E-08   |
| TcCLB.506839.10  | serine/threonine kinase, putative                         | 0,5837 | 0,7031     |
| TcCLB.508461.142 | hypothetical protein                                      | 0,5835 | 0,0000195  |
| TcCLB.509643.90  | serine peptidase, putative                                | 0,5834 | 8,927E-06  |
| TcCLB.510635.10  | trans-sialidase, Group VII, putative                      | 0,5832 | 0,1262     |
| TcCLB.510151.10  | fatty acyl CoA syntetase 1, putative                      | 0,5831 | 0,00003903 |
| TcCLB.508389.154 | mucin-associated surface protein (MASP), putative         | 0,583  | 0,2252     |
| TcCLB.504575.20  | hypothetical protein, conserved                           | 0,5828 | 0,0001969  |
| TcCLB.511261.30  | NADH-ubiquinone oxidoreductase complex I subunit, putati  | 0,5827 | 3,868E-07  |
| TcCLB.507049.50  | ABC transporter, putative                                 | 0,5826 | 0,00003762 |
| TcCLB.506955.212 | mucin-associated surface protein (MASP), putative         | 0,5826 | 0,1256     |
| TcCLB.508169.110 | hypothetical protein, conserved                           | 0,5825 | 0,001741   |
| TcCLB.507623.80  | hypothetical protein, conserved                           | 0,5824 | 0,00006198 |
| TcCLB.511183.360 | mucin-associated surface protein (MASP), putative         | 0,5821 | 0,08668    |
| TcCLB.509819.20  | hypothetical protein, conserved                           | 0,582  | 1,347E-11  |
| TcCLB.508263.30  | kinesin, putative                                         | 0,582  | 2,172E-06  |
| TcCLB.511357.9   | hypothetical protein, conserved                           | 0,582  | 5,316E-06  |
| TcCLB.418221.20  | hypothetical protein, conserved                           | 0,5818 | 1,827E-08  |

|                  |                                                           |        |            |
|------------------|-----------------------------------------------------------|--------|------------|
| TcCLB.511821.90  | hypothetical protein, conserved                           | 0,5815 | 0,001257   |
| TcCLB.506443.110 | retrotransposon hot spot protein (RHS, pseudogene), putat | 0,5814 | 0,0006718  |
| TcCLB.506455.30  | trans-sialidase, Group II, putative                       | 0,5814 | 0,06213    |
| TcCLB.506529.535 | hypothetical protein, conserved                           | 0,5814 | 0,3688     |
| TcCLB.509657.40  | mucin TcMUCII, putative                                   | 0,5811 | 0,1367     |
| TcCLB.507069.50  | mucin-associated surface protein (MASP, pseudogene), pu   | 0,581  | 0,2444     |
| TcCLB.509207.30  | hypothetical protein, conserved                           | 0,5809 | 0,0007565  |
| TcCLB.506965.10  | mucin TcMUCII, putative                                   | 0,5809 | 0,283      |
| TcCLB.506463.10  | Lys-63-specific deubiquitinase BRCC36, putative           | 0,5808 | 0,00008889 |
| TcCLB.507017.20  | Present in the outer mitochondrial membrane proteome 3l   | 0,5803 | 0,00005395 |
| TcCLB.508173.260 | hypothetical protein, conserved                           | 0,5802 | 0,00000122 |
| TcCLB.511649.150 | phosphoglycerate mutase protein, putative                 | 0,58   | 0,0001179  |
| TcCLB.506351.9   | 5'-3' exoribonuclease A, putative (fragment) (XRNA)       | 0,5797 | 0,0003777  |
| TcCLB.509217.146 | N-acetyltransferase complex ARD1 subunit (pseudogene),    | 0,5797 | 0,3715     |
| TcCLB.506659.10  | immunodominant antigen, putative                          | 0,5795 | 1,307E-10  |
| TcCLB.507601.130 | hypothetical protein, conserved                           | 0,5795 | 7,002E-07  |
| TcCLB.510307.10  | surface protease GP63, putative                           | 0,5794 | 0,1666     |
| TcCLB.510519.50  | hypothetical protein, conserved                           | 0,5793 | 0,0009643  |
| TcCLB.503429.30  | mucin-associated surface protein (MASP), putative         | 0,5791 | 0,2991     |
| TcCLB.511727.270 | RNA-binding protein, putative                             | 0,5785 | 1,538E-15  |
| TcCLB.506153.10  | amino acid transporter, putative                          | 0,5785 | 3,426E-12  |
| TcCLB.507765.110 | hypothetical protein, conserved                           | 0,5785 | 1,215E-08  |
| TcCLB.509151.40  | inorganic polyphosphate/ATP-NAD kinase, putative          | 0,5783 | 1,956E-12  |
| TcCLB.510371.35  | hypothetical protein, conserved (pseudogene)              | 0,5782 | 0,4104     |
| TcCLB.511919.20  | trans-sialidase, Group V, putative                        | 0,578  | 0,002951   |
| TcCLB.506767.127 | hypothetical protein, conserved (pseudogene)              | 0,5778 | 0,4531     |
| TcCLB.506495.9   | hypothetical protein, conserved                           | 0,5777 | 5,092E-06  |
| TcCLB.506999.50  | hypothetical protein, conserved                           | 0,5776 | 2,658E-06  |
| TcCLB.510373.60  | mucin-associated surface protein (MASP), putative         | 0,5774 | 0,09308    |
| TcCLB.510019.10  | mucin TcMUCII, putative                                   | 0,5772 | 0,3733     |
| TcCLB.509825.20  | hypothetical protein, conserved                           | 0,577  | 0,00007428 |
| TcCLB.508869.20  | mucin-associated surface protein (MASP), putative         | 0,577  | 0,2381     |
| TcCLB.506227.150 | Flagellum matrix protein 458 (PKA-R)                      | 0,5768 | 6,162E-06  |
| TcCLB.509167.110 | S-adenosylmethionine decarboxylase proenzyme, putative    | 0,5768 | 8,289E-06  |
| TcCLB.508799.120 | amino acid permease/transporter, putative                 | 0,5763 | 9,19E-08   |
| TcCLB.508629.26  | retrotransposon hot spot protein (RHS, pseudogene), putat | 0,576  | 0,004912   |
| TcCLB.508173.230 | hypothetical protein, conserved                           | 0,5759 | 6,397E-08  |
| TcCLB.508469.30  | hypothetical protein, conserved                           | 0,5759 | 0,0001485  |
| TcCLB.511411.30  | arginine permease (AAP411)                                | 0,5758 | 0,2708     |
| TcCLB.511017.50  | glycosomal membrane protein, putative                     | 0,5757 | 2,844E-08  |
| TcCLB.510155.120 | ubiquitin activating enzyme, putative                     | 0,5757 | 2,031E-06  |
| TcCLB.503403.20  | trans-sialidase, Group II, putative                       | 0,5757 | 0,1066     |
| TcCLB.510583.70  | mucin TcMUCII, putative                                   | 0,5757 | 0,2794     |
| TcCLB.509871.10  | retrotransposon hot spot protein (RHS, pseudogene), putat | 0,5755 | 2,146E-07  |
| TcCLB.508893.20  | hypothetical protein, conserved                           | 0,5753 | 3,047E-08  |

|                  |                                                               |        |            |
|------------------|---------------------------------------------------------------|--------|------------|
| TcCLB.506743.200 | 3-Beta-hydroxysteroid-delta(8), delta(7)-isomerase, putative  | 0,5752 | 0,004483   |
| TcCLB.506843.80  | trans-sialidase (pseudogene), putative                        | 0,5752 | 0,02559    |
| TcCLB.508559.90  | retrotransposon hot spot (RHS) protein, putative              | 0,5749 | 0,0002716  |
| TcCLB.506635.90  | ubiquitin-protein ligase, putative                            | 0,5747 | 0,001355   |
| TcCLB.507559.90  | hypothetical protein                                          | 0,5743 | 7,616E-10  |
| TcCLB.506335.50  | mucin-associated surface protein (MASP), putative             | 0,5741 | 0,066      |
| TcCLB.506537.240 | hypothetical protein, conserved                               | 0,5739 | 0,005151   |
| TcCLB.510749.40  | ubiquitin hydrolase, putative                                 | 0,5738 | 0,1025     |
| TcCLB.508909.210 | hypothetical protein, conserved                               | 0,5732 | 1,746E-08  |
| TcCLB.509979.14  | peroxisomal membrane protein 4, putative                      | 0,5732 | 0,00002259 |
| TcCLB.506247.24  | hypothetical protein, conserved                               | 0,5732 | 0,03259    |
| TcCLB.503855.50  | hypothetical protein, conserved                               | 0,573  | 3,348E-13  |
| TcCLB.507875.210 | retrotransposon hot spot protein (RHS, pseudogene), putative  | 0,573  | 1,255E-08  |
| TcCLB.507049.65  | hypothetical protein, conserved (pseudogene)                  | 0,5729 | 0,06723    |
| TcCLB.510857.40  | RNA-editing complex protein, putative                         | 0,5724 | 2,089E-06  |
| TcCLB.511277.570 | 60S ribosomal protein L7, putative                            | 0,5721 | 7,456E-07  |
| TcCLB.453445.20  | ubiquitin-conjugating enzyme E2, putative                     | 0,5721 | 5,651E-06  |
| TcCLB.504081.350 | mucin-associated surface protein (MASP), putative             | 0,5716 | 0,1814     |
| TcCLB.504023.10  | hypothetical protein, conserved                               | 0,5714 | 0,00224    |
| TcCLB.509925.10  | mucin-associated surface protein (MASP), putative             | 0,5713 | 0,08219    |
| TcCLB.509223.10  | dispersed gene family protein 1 (DGF-1, pseudogene), putative | 0,5712 | 0,000551   |
| TcCLB.503487.30  | hypothetical protein, conserved                               | 0,5711 | 0,0002606  |
| TcCLB.510303.270 | hypothetical protein, conserved                               | 0,5706 | 3,357E-13  |
| TcCLB.508375.89  | fucose kinase, putative (fragment)                            | 0,5705 | 0,1215     |
| TcCLB.506435.400 | hypothetical protein, conserved                               | 0,5704 | 2,288E-08  |
| TcCLB.508463.29  | hypothetical protein, conserved                               | 0,5704 | 0,0001689  |
| TcCLB.511371.10  | retrotransposon hot spot (RHS) protein, putative              | 0,5703 | 0,00003324 |
| TcCLB.510731.20  | hypothetical protein, conserved                               | 0,5701 | 0,00001527 |
| TcCLB.507121.20  | trans-sialidase, Group VII, putative                          | 0,5701 | 0,003797   |
| TcCLB.503715.20  | hypothetical protein                                          | 0,5694 | 0,000218   |
| TcCLB.508401.10  | trans-sialidase, putative                                     | 0,5694 | 0,2595     |
| TcCLB.511697.30  | hypothetical protein                                          | 0,5692 | 0,1303     |
| TcCLB.508793.14  | dynein regulatory complex subunit, putative (fragment)        | 0,5691 | 1,257E-06  |
| TcCLB.509029.70  | leucine-rich repeat protein, putative                         | 0,5691 | 0,0001272  |
| TcCLB.508971.50  | ubiquitin-protein ligase-like, putative                       | 0,569  | 4,718E-11  |
| TcCLB.507559.30  | hypothetical protein, conserved                               | 0,569  | 0,00001243 |
| TcCLB.508153.270 | heat shock protein 20, putative                               | 0,569  | 0,00001582 |
| TcCLB.510317.7   | Present in the outer mitochondrial membrane proteome 2.       | 0,5689 | 2,973E-08  |
| TcCLB.509569.160 | hypothetical protein, conserved                               | 0,5688 | 0,00001467 |
| TcCLB.506525.150 | hypothetical protein, conserved                               | 0,5685 | 2,924E-08  |
| TcCLB.507669.90  | hypothetical protein, conserved                               | 0,5685 | 5,825E-06  |
| TcCLB.506759.170 | mucin-associated surface protein (MASP), putative             | 0,5685 | 0,1978     |
| TcCLB.510683.20  | hypothetical protein, conserved                               | 0,5683 | 0,00009154 |
| TcCLB.506289.150 | mucin-associated surface protein (MASP), putative             | 0,5678 | 0,07042    |
| TcCLB.508415.20  | hypothetical protein, conserved                               | 0,5677 | 0,00005321 |

|                  |                                                           |        |            |
|------------------|-----------------------------------------------------------|--------|------------|
| TcCLB.506401.300 | hypothetical protein, conserved                           | 0,5675 | 0,00001859 |
| TcCLB.509911.74  | hypothetical protein, conserved                           | 0,5674 | 0,00001529 |
| TcCLB.508247.100 | hypothetical protein (pseudogene)                         | 0,5674 | 0,1415     |
| TcCLB.511171.50  | mucin-associated surface protein (MASP, pseudogene), pu   | 0,5674 | 0,1826     |
| TcCLB.509635.9   | hypothetical protein, conserved                           | 0,5673 | 0,00003395 |
| TcCLB.504131.40  | hypothetical protein, conserved                           | 0,5672 | 0,00001783 |
| TcCLB.508493.60  | trans-sialidase (pseudogene), putative                    | 0,5669 | 0,0007478  |
| TcCLB.509809.39  | P-type H -ATPase, putative                                | 0,5668 | 1,401E-11  |
| TcCLB.509971.60  | surface protease GP63, putative                           | 0,5666 | 0,2742     |
| TcCLB.509177.40  | hypothetical protein, conserved                           | 0,5664 | 0,0001955  |
| TcCLB.509683.20  | hypothetical protein, conserved                           | 0,5663 | 1,749E-07  |
| TcCLB.503881.20  | GDP-mannose 4,6 dehydratase, putative                     | 0,5661 | 0,00000397 |
| TcCLB.509899.100 | trans-sialidase, Group V, putative                        | 0,5661 | 0,00689    |
| TcCLB.509229.70  | hypothetical protein, conserved                           | 0,566  | 0,0002729  |
| TcCLB.508879.60  | hypothetical protein, conserved                           | 0,5658 | 4,859E-10  |
| TcCLB.507099.50  | programmed cell death 6 protein-like, putative            | 0,5658 | 0,00001526 |
| TcCLB.453917.9   | hypothetical protein, conserved                           | 0,5657 | 0,0008031  |
| TcCLB.508977.50  | mucin-associated surface protein (MASP), putative         | 0,5653 | 0,07978    |
| TcCLB.510121.170 | cysteine peptidase, Clan CA, family C2, putative          | 0,5652 | 1,738E-11  |
| TcCLB.411337.10  | retrotransposon hot spot protein (RHS, pseudogene), putat | 0,5649 | 0,01247    |
| TcCLB.511657.79  | hypothetical protein, conserved                           | 0,5646 | 0,06478    |
| TcCLB.511621.90  | esterase, putative                                        | 0,5645 | 0,0013     |
| TcCLB.506401.150 | hypothetical protein, conserved                           | 0,5637 | 0,0007591  |
| TcCLB.509633.50  | serine/threonine-protein phosphatase PP1, putative        | 0,5636 | 0,0716     |
| TcCLB.504137.160 | hypothetical protein, conserved                           | 0,5635 | 0,005313   |
| TcCLB.506145.10  | hypothetical protein, conserved                           | 0,5634 | 6,359E-12  |
| TcCLB.511323.60  | hypothetical protein, conserved                           | 0,5634 | 0,0000101  |
| TcCLB.506479.130 | cytidine triphosphate synthase, putative                  | 0,5631 | 0,0001254  |
| TcCLB.506993.40  | mucin TcMUCII, putative                                   | 0,5631 | 0,3803     |
| TcCLB.504557.40  | hypothetical protein                                      | 0,563  | 0,2018     |
| TcCLB.508865.30  | immunodominant antigen, putative                          | 0,5625 | 1,849E-15  |
| TcCLB.510533.210 | hypothetical protein, conserved (pseudogene)              | 0,5623 | 0,00003729 |
| TcCLB.400945.10  | trans-sialidase (pseudogene), putative                    | 0,5623 | 0,2299     |
| TcCLB.511725.30  | hypothetical protein, conserved                           | 0,5622 | 0,005466   |
| TcCLB.511175.40  | mucin TcMUCII, putative                                   | 0,562  | 0,1284     |
| TcCLB.508761.280 | mucin TcMUCII, putative                                   | 0,562  | 0,254      |
| TcCLB.421951.10  | trans-sialidase, putative (fragment)                      | 0,562  | 0,4853     |
| TcCLB.506465.10  | hypothetical protein, conserved                           | 0,5618 | 0,00002465 |
| TcCLB.503823.120 | hypothetical protein, conserved                           | 0,5617 | 0,0006065  |
| TcCLB.506605.150 | 60S ribosomal protein, putative                           | 0,5616 | 0,0007576  |
| TcCLB.508265.100 | hypothetical protein, conserved                           | 0,5615 | 7,615E-10  |
| TcCLB.509799.110 | hypothetical protein, conserved                           | 0,5613 | 0,007517   |
| TcCLB.506311.30  | hypothetical protein, conserved                           | 0,5612 | 0,000176   |
| TcCLB.508029.20  | ubiquitin-protein ligase, putative                        | 0,5612 | 0,002718   |
| TcCLB.503939.40  | hypothetical protein, conserved                           | 0,5611 | 8,24E-08   |

|                  |                                                               |        |            |
|------------------|---------------------------------------------------------------|--------|------------|
| TcCLB.507087.80  | 5'-3' exoribonuclease B, putative (XRNB)                      | 0,561  | 1,234E-06  |
| TcCLB.505945.80  | hypothetical protein, conserved                               | 0,561  | 0,00001365 |
| TcCLB.510783.30  | dispersed gene family protein 1 (DGF-1, pseudogene), putative | 0,561  | 0,1829     |
| TcCLB.511553.5   | trans-sialidase (pseudogene), putative                        | 0,561  | 0,4004     |
| TcCLB.503627.20  | protein kinase, putative                                      | 0,5607 | 2,981E-09  |
| TcCLB.504425.70  | hypothetical protein, conserved                               | 0,5607 | 4,107E-06  |
| TcCLB.503973.80  | mucin-associated surface protein (MASP), putative             | 0,5607 | 0,1883     |
| TcCLB.504057.90  | hypothetical protein, conserved                               | 0,5605 | 1,595E-07  |
| TcCLB.508325.230 | trans-sialidase, Group IV, putative                           | 0,5604 | 3,078E-08  |
| TcCLB.507669.80  | protein phosphatase, putative                                 | 0,5604 | 4,047E-07  |
| TcCLB.505989.90  | hypothetical protein, conserved                               | 0,5602 | 1,634E-06  |
| TcCLB.506825.50  | hypothetical protein, conserved                               | 0,5601 | 5,446E-08  |
| TcCLB.511321.20  | hypothetical protein, conserved                               | 0,5599 | 3,23E-08   |
| TcCLB.504155.280 | trans-sialidase (pseudogene), putative                        | 0,5599 | 0,03744    |
| TcCLB.506337.50  | hypothetical protein, conserved                               | 0,5598 | 9,867E-08  |
| TcCLB.507907.30  | retrotransposon hot spot (RHS) protein, putative              | 0,5598 | 0,07874    |
| TcCLB.508601.90  | Small Surface Antigen (LDK)                                   | 0,5597 | 0,00002042 |
| TcCLB.503825.19  | protein kinase, putative                                      | 0,5597 | 0,06129    |
| TcCLB.511261.4   | P-type H -ATPase, putative (fragment)                         | 0,5596 | 2,016E-10  |
| TcCLB.504149.210 | N-acetyltransferase complex ARD1 subunit (pseudogene),        | 0,5595 | 0,06473    |
| TcCLB.508417.20  | hypothetical protein                                          | 0,5594 | 0,2515     |
| TcCLB.511813.10  | hypothetical protein, conserved                               | 0,5588 | 0,0001612  |
| TcCLB.510381.20  | ABC transporter, putative                                     | 0,5588 | 0,0001855  |
| TcCLB.510367.10  | dispersed gene family protein 1 (DGF-1), putative             | 0,5588 | 0,02046    |
| TcCLB.460747.30  | hypothetical protein, conserved                               | 0,5586 | 0,03135    |
| TcCLB.508153.750 | hypothetical protein, conserved                               | 0,5581 | 0,00009131 |
| TcCLB.503749.5   | pyrroline-5-carboxylate synthetase-like protein, putative (f) | 0,5581 | 0,0006032  |
| TcCLB.506923.10  | trans-sialidase (pseudogene), putative                        | 0,5581 | 0,09639    |
| TcCLB.511277.400 | UDP-galactose transporter                                     | 0,5579 | 0,0001359  |
| TcCLB.510377.400 | mucin TcMUCII, putative                                       | 0,5578 | 0,3407     |
| TcCLB.511809.90  | hypothetical protein, conserved                               | 0,5577 | 1,111E-06  |
| TcCLB.509753.290 | hypothetical protein, conserved (pseudogene)                  | 0,5577 | 0,1528     |
| TcCLB.508449.20  | retrotransposon hot spot protein (RHS, pseudogene), putative  | 0,5575 | 0,001714   |
| TcCLB.508831.80  | hypothetical protein, conserved                               | 0,5574 | 0,01223    |
| TcCLB.511887.10  | retrotransposon hot spot protein (RHS, pseudogene), putative  | 0,5573 | 0,002269   |
| TcCLB.510359.290 | hypothetical protein, conserved                               | 0,557  | 0,032      |
| TcCLB.510575.239 | hypothetical protein, conserved                               | 0,557  | 0,2123     |
| TcCLB.508465.30  | hypothetical protein, conserved                               | 0,5568 | 2,457E-06  |
| TcCLB.505959.10  | mucin TcMUCII, putative                                       | 0,5568 | 0,2536     |
| TcCLB.509767.90  | alanine racemase, putative                                    | 0,5567 | 1,711E-06  |
| TcCLB.511925.30  | fucose kinase (pseudogene), putative                          | 0,5565 | 1,037E-06  |
| TcCLB.506573.81  | ribosomal protein L39, putative                               | 0,5565 | 0,0004925  |
| TcCLB.509065.140 | hypothetical protein, conserved                               | 0,5564 | 0,004536   |
| TcCLB.509733.150 | hypothetical protein, conserved                               | 0,5562 | 4,943E-07  |
| TcCLB.504777.50  | mucin-associated surface protein (MASP, pseudogene), putative | 0,5562 | 0,05659    |

|                  |                                                           |        |            |
|------------------|-----------------------------------------------------------|--------|------------|
| TcCLB.507981.30  | hypothetical protein                                      | 0,5562 | 0,5266     |
| TcCLB.503801.30  | DNA repair protein RAD51, putative (RAD51)                | 0,5561 | 1,119E-09  |
| TcCLB.507641.200 | hypothetical protein, conserved                           | 0,5561 | 0,005148   |
| TcCLB.508741.220 | hypothetical protein                                      | 0,556  | 2,121E-07  |
| TcCLB.507757.26  | hypothetical protein                                      | 0,556  | 0,3562     |
| TcCLB.503893.120 | calcium uniporter protein, mitochondrial, putative        | 0,5559 | 0,001733   |
| TcCLB.504147.50  | amino acid transporter (pseudogene), putative             | 0,5558 | 0,000124   |
| TcCLB.508981.30  | hypothetical protein, conserved                           | 0,5557 | 0,000882   |
| TcCLB.509393.30  | hypothetical protein, conserved                           | 0,5554 | 5,844E-06  |
| TcCLB.511577.100 | hypothetical protein, conserved                           | 0,5554 | 0,0006234  |
| TcCLB.506773.30  | hypothetical protein, conserved                           | 0,5552 | 2,182E-08  |
| TcCLB.507875.220 | trans-sialidase, Group II, putative                       | 0,5552 | 0,008818   |
| TcCLB.506757.150 | mucin-associated surface protein (MASP), putative         | 0,5551 | 0,08129    |
| TcCLB.503661.11  | trans-sialidase, putative (fragment)                      | 0,5549 | 0,005692   |
| TcCLB.511259.18  | mucin-associated surface protein (MASP, pseudogene), pu   | 0,5549 | 0,1805     |
| TcCLB.505063.30  | mucin-associated surface protein (MASP, pseudogene), pu   | 0,5548 | 0,0004645  |
| TcCLB.507519.260 | retrotransposon hot spot protein (RHS, pseudogene), putat | 0,5547 | 3,63E-07   |
| TcCLB.507851.40  | hypothetical protein, conserved                           | 0,5546 | 0,002892   |
| TcCLB.510025.90  | mucin TcMUCII, putative                                   | 0,5546 | 0,2833     |
| TcCLB.507159.60  | hypothetical protein, conserved                           | 0,5545 | 3,827E-11  |
| TcCLB.412419.10  | mucin-associated surface protein (MASP, pseudogene), pu   | 0,5545 | 0,1649     |
| TcCLB.511045.29  | hypothetical protein, conserved                           | 0,5544 | 0,00003071 |
| TcCLB.506051.20  | hypothetical protein                                      | 0,5543 | 0,2773     |
| TcCLB.508409.329 | hypothetical protein, conserved                           | 0,5541 | 0,0001945  |
| TcCLB.511071.50  | 3-hydroxy-3-methylglutaryl-CoA synthase, putative         | 0,5539 | 3,058E-13  |
| TcCLB.504593.10  | trans-sialidase, putative (CRP10)                         | 0,5539 | 0,08371    |
| TcCLB.511431.40  | glutaredoxin, putative                                    | 0,5538 | 0,001379   |
| TcCLB.510105.210 | metallo-peptidase, Clan MA(E) Family M41                  | 0,5536 | 4,316E-08  |
| TcCLB.508777.60  | hypothetical protein, conserved                           | 0,5536 | 0,005312   |
| TcCLB.508859.30  | hypothetical protein, conserved                           | 0,5535 | 0,00006778 |
| TcCLB.504201.44  | mucin TcMUCII, putative                                   | 0,5534 | 0,3678     |
| TcCLB.508761.200 | trans-sialidase (pseudogene), putative                    | 0,5533 | 0,1507     |
| TcCLB.509459.70  | hypothetical protein, conserved                           | 0,5532 | 4,851E-06  |
| TcCLB.506757.10  | phospholipid:diacylglycerol acyltransferase, putative     | 0,5531 | 4,088E-08  |
| TcCLB.511535.20  | hypothetical protein, conserved                           | 0,5531 | 0,0001107  |
| TcCLB.509023.160 | hypothetical protein, conserved                           | 0,553  | 0,00004454 |
| TcCLB.506799.90  | surface protease GP63 (pseudogene), putative              | 0,5525 | 0,003769   |
| TcCLB.508461.440 | hypothetical protein, conserved                           | 0,5523 | 3,983E-06  |
| TcCLB.509801.30  | citrate synthase, putative                                | 0,5523 | 0,1596     |
| TcCLB.505007.30  | hypothetical protein, conserved                           | 0,5522 | 0,000938   |
| TcCLB.508153.460 | Present in the outer mitochondrial membrane proteome 2.   | 0,5521 | 3,442E-10  |
| TcCLB.398751.10  | hypothetical protein, conserved                           | 0,5519 | 0,2899     |
| TcCLB.508153.670 | hypothetical protein, conserved                           | 0,5518 | 0,04069    |
| TcCLB.506401.350 | hypothetical protein, conserved                           | 0,5517 | 1,477E-06  |
| TcCLB.508251.31  | mucin-associated surface protein (MASP, pseudogene), pu   | 0,5512 | 0,1057     |



|                  |                                                            |        |            |
|------------------|------------------------------------------------------------|--------|------------|
| TcCLB.508961.79  | 69 kDa paraflagellar rod protein, putative                 | 0,5511 | 3,227E-08  |
| TcCLB.504165.10  | hypothetical protein, conserved                            | 0,551  | 0,00009853 |
| TcCLB.509537.20  | hypothetical protein, conserved                            | 0,5501 | 8,977E-06  |
| TcCLB.509353.20  | Present in the outer mitochondrial membrane proteome 4     | 0,55   | 0,003761   |
| TcCLB.506559.490 | hypothetical protein, conserved                            | 0,5499 | 0,0313     |
| TcCLB.511255.490 | trans-sialidase (pseudogene), putative                     | 0,5499 | 0,2454     |
| TcCLB.508555.70  | calpain-like cysteine peptidase, putative                  | 0,5497 | 0,0007783  |
| TcCLB.506203.20  | dynein light chain, putative                               | 0,5496 | 0,00003655 |
| TcCLB.508727.50  | hypothetical protein, conserved                            | 0,5495 | 0,00047    |
| TcCLB.511259.149 | mucin-associated surface protein (MASP, pseudogene), pu    | 0,5495 | 0,27       |
| TcCLB.509053.160 | hypothetical protein, conserved                            | 0,5494 | 0,0003699  |
| TcCLB.511517.99  | hypothetical protein, conserved                            | 0,5493 | 0,004229   |
| TcCLB.506487.24  | dispersed gene family protein 1 (DGF-1), putative          | 0,5493 | 0,01606    |
| TcCLB.508515.100 | hypothetical protein, conserved                            | 0,5489 | 0,002556   |
| TcCLB.504427.240 | metallo-beta-lactamase-like protein, putative              | 0,5488 | 0,002118   |
| TcCLB.510655.20  | hypothetical protein, conserved                            | 0,5487 | 0,00007205 |
| TcCLB.511833.10  | trans-sialidase, Group VIII, putative                      | 0,5487 | 0,009461   |
| TcCLB.508973.50  | ATP-dependent DEAD/H RNA helicase, putative                | 0,5486 | 1,265E-08  |
| TcCLB.511101.37  | retrotransposon hot spot protein (RHS, pseudogene), putat  | 0,5486 | 0,0002679  |
| TcCLB.509195.61  | mucin TcMUCII, putative                                    | 0,5483 | 0,3422     |
| TcCLB.510099.110 | hypothetical protein, conserved                            | 0,5482 | 3,356E-09  |
| TcCLB.504769.89  | hypothetical protein, conserved                            | 0,5481 | 0,001573   |
| TcCLB.506767.360 | mucin TcMUCII, putative                                    | 0,5481 | 0,2737     |
| TcCLB.509287.170 | trans-sialidase (pseudogene), putative                     | 0,548  | 0,00142    |
| TcCLB.510633.9   | dispersed gene family protein 1 (DGF-1), putative (fragme  | 0,548  | 0,08189    |
| TcCLB.503791.20  | hypothetical protein, conserved                            | 0,5479 | 0,04568    |
| TcCLB.509253.30  | 3-Beta-hydroxysteroid-delta(8), delta(7)-isomerase, putati | 0,5478 | 0,0008471  |
| TcCLB.510851.50  | hypothetical protein, conserved (pseudogene)               | 0,5474 | 0,0001271  |
| TcCLB.506253.39  | trans-sialidase, putative (CRP10)                          | 0,5474 | 0,09268    |
| TcCLB.508613.74  | mucin-associated surface protein (MASP), putative          | 0,5471 | 0,0236     |
| TcCLB.507093.69  | hypothetical protein, conserved                            | 0,5469 | 0,0121     |
| TcCLB.510661.120 | hypothetical protein, conserved                            | 0,5467 | 0,0000959  |
| TcCLB.511469.100 | 2-oxoisovalerate dehydrogenase beta subunit, mitochondri   | 0,5466 | 0,00004183 |
| TcCLB.506843.75  | hypothetical protein, conserved (pseudogene)               | 0,5466 | 0,1797     |
| TcCLB.511705.20  | putative prolyl carboxypeptidase, putative                 | 0,5465 | 0,007274   |
| TcCLB.509611.20  | peptidyl-prolyl cis-trans isomerase (PIN1)                 | 0,5464 | 0,01232    |
| TcCLB.503623.10  | dispersed gene family protein 1 (DGF-1), putative          | 0,5464 | 0,3803     |
| TcCLB.508299.70  | peroxisome targeting signal 1 receptor, putative (PEX5)    | 0,5463 | 1,932E-07  |
| TcCLB.509885.10  | V-type proton ATPase subunit D, putative (VAd)             | 0,5463 | 3,608E-06  |
| TcCLB.510955.40  | axoneme central apparatus protein (PF16)                   | 0,5459 | 4,539E-06  |
| TcCLB.508325.80  | trans-sialidase (pseudogene), putative                     | 0,5459 | 0,00005923 |
| TcCLB.507529.30  | hypothetical protein, conserved                            | 0,5458 | 2,903E-07  |
| TcCLB.511173.210 | mucin-associated surface protein (MASP), putative          | 0,5457 | 0,308      |
| TcCLB.510697.10  | mucin-associated surface protein (MASP), putative          | 0,5455 | 0,2842     |
| TcCLB.503809.120 | hypothetical protein, conserved                            | 0,5454 | 0,009619   |

|                  |                                                              |        |            |
|------------------|--------------------------------------------------------------|--------|------------|
| TcCLB.506667.130 | surface protease GP63 (pseudogene), putative                 | 0,5454 | 0,3777     |
| TcCLB.509113.10  | mucin-associated surface protein (MASP, pseudogene), pu      | 0,5453 | 0,1404     |
| TcCLB.510431.250 | phosphoribosylpyrophosphate synthetase, putative             | 0,5452 | 2,872E-10  |
| TcCLB.506537.160 | glycine dehydrogenase [decarboxylating] (pseudogene), pu     | 0,5452 | 0,001243   |
| TcCLB.509529.40  | trans-sialidase, Group VII, putative                         | 0,5451 | 0,04889    |
| TcCLB.507959.210 | mucin-associated surface protein (MASP), putative            | 0,5449 | 0,231      |
| TcCLB.509053.120 | hypothetical protein, conserved                              | 0,5448 | 0,0001699  |
| TcCLB.508991.30  | trans-sialidase (pseudogene), putative                       | 0,5448 | 0,00811    |
| TcCLB.506401.70  | vacuolar protein sorting protein 18, putative                | 0,5444 | 6,103E-09  |
| TcCLB.506301.40  | hypothetical protein, conserved                              | 0,5444 | 0,00001704 |
| TcCLB.506359.40  | hypothetical protein, conserved                              | 0,5443 | 0,00004021 |
| TcCLB.506047.16  | N-acetyltransferase complex ARD1 subunit (pseudogene),       | 0,5442 | 0,1293     |
| TcCLB.511873.20  | hypothetical protein                                         | 0,544  | 0,1677     |
| TcCLB.510025.20  | mucin TcMUCII, putative                                      | 0,544  | 0,271      |
| TcCLB.503667.10  | trans-sialidase, putative                                    | 0,5439 | 0,0648     |
| TcCLB.506611.40  | mucin-associated surface protein (MASP), putative            | 0,5435 | 0,0778     |
| TcCLB.510105.20  | Ribosomal RNA processing protein 41A (RRP41A)                | 0,5434 | 8,363E-08  |
| TcCLB.510235.10  | dispersed gene family protein 1 (DGF-1), putative            | 0,5434 | 0,0201     |
| TcCLB.508711.10  | Tetratricopeptide-like helical domain containing protein (fr | 0,5433 | 2,483E-14  |
| TcCLB.507615.80  | hypothetical protein, conserved                              | 0,5429 | 2,994E-07  |
| TcCLB.506195.50  | hypothetical protein, conserved                              | 0,5429 | 0,003349   |
| TcCLB.510361.80  | trans-sialidase, Group V, putative                           | 0,5425 | 0,1058     |
| TcCLB.509733.60  | hypothetical protein                                         | 0,5424 | 0,00007782 |
| TcCLB.509573.30  | flagellar protofilament ribbon protein, putative             | 0,5422 | 3,211E-08  |
| TcCLB.507087.10  | hydrolase-like protein (pseudogene), putative                | 0,5421 | 0,01539    |
| TcCLB.511313.10  | hypothetical protein, conserved                              | 0,5419 | 0,01231    |
| TcCLB.507043.10  | mucin TcMUCI, putative                                       | 0,5418 | 0,1648     |
| TcCLB.510819.30  | hypothetical protein                                         | 0,5416 | 0,0003273  |
| TcCLB.509571.79  | Ras-related protein RabX1, putative (RABX1)                  | 0,5414 | 0,000146   |
| TcCLB.510237.70  | mucin-associated surface protein (MASP), putative            | 0,5414 | 0,3185     |
| TcCLB.506661.20  | fatty acid elongase, putative                                | 0,5412 | 3,972E-06  |
| TcCLB.511867.130 | hypothetical protein, conserved                              | 0,5411 | 3,856E-08  |
| TcCLB.511807.180 | hypothetical protein, conserved                              | 0,5409 | 3,037E-13  |
| TcCLB.506333.10  | plasma-membrane proton-efflux P-type ATPase, putative        | 0,5406 | 4,809E-16  |
| TcCLB.510535.30  | hypothetical protein                                         | 0,5406 | 0,001043   |
| TcCLB.508607.40  | retrotransposon hot spot protein (RHS, pseudogene), putat    | 0,5403 | 0,00003308 |
| TcCLB.505183.50  | hypothetical protein, conserved                              | 0,5402 | 0,00002519 |
| TcCLB.510483.190 | mucin TcMUCII, putative                                      | 0,5402 | 0,1294     |
| TcCLB.504881.50  | ABC transporter, putative                                    | 0,54   | 0,005535   |
| TcCLB.506755.30  | hypothetical protein, conserved                              | 0,5398 | 0,0001687  |
| TcCLB.506995.70  | mucin-associated surface protein (MASP), putative            | 0,5397 | 0,1532     |
| TcCLB.508881.20  | hypothetical protein, conserved                              | 0,5395 | 0,00006909 |
| TcCLB.508351.10  | fructose-1,6-bisphosphatase, cytosolic, putative             | 0,5392 | 0,00003145 |
| TcCLB.506139.60  | trans-sialidase (pseudogene), putative                       | 0,5392 | 0,03138    |
| TcCLB.510571.30  | actin 1, putative                                            | 0,5391 | 7,216E-12  |

|                  |                                                             |        |            |
|------------------|-------------------------------------------------------------|--------|------------|
| TcCLB.511127.410 | hypothetical protein, conserved                             | 0,5388 | 5,403E-07  |
| TcCLB.454391.10  | trans-sialidase (pseudogene), putative                      | 0,5388 | 0,0001328  |
| TcCLB.507069.130 | mucin-associated surface protein (MASP, pseudogene), pu     | 0,5387 | 0,1951     |
| TcCLB.506449.10  | trans-sialidase, Group III, putative                        | 0,5385 | 0,6446     |
| TcCLB.503713.20  | hypothetical protein, conserved                             | 0,5379 | 0,0137     |
| TcCLB.506715.20  | Lys-63-specific deubiquitinase BRCC36, putative             | 0,5378 | 0,01799    |
| TcCLB.508163.400 | surface antigen TASV-B1, putative                           | 0,5378 | 0,1666     |
| TcCLB.507869.20  | trans-sialidase (pseudogene), putative                      | 0,5376 | 7,684E-06  |
| TcCLB.503689.4   | Ras-related protein RabX1, putative (RABX1)                 | 0,5371 | 0,0008699  |
| TcCLB.506423.10  | mucin-associated surface protein (MASP), putative           | 0,5371 | 0,4164     |
| TcCLB.503955.100 | protein kinase, putative                                    | 0,537  | 1,102E-06  |
| TcCLB.509443.60  | hypothetical protein, conserved                             | 0,537  | 0,02742    |
| TcCLB.511141.20  | choline dehydrogenase, putative                             | 0,5369 | 4,064E-10  |
| TcCLB.506485.70  | hypothetical protein, conserved                             | 0,5369 | 8,772E-06  |
| TcCLB.506529.220 | hypothetical protein, conserved                             | 0,5369 | 0,0002594  |
| TcCLB.508147.159 | dispersed gene family protein 1 (DGF-1), putative           | 0,5366 | 0,1908     |
| TcCLB.510877.180 | GPI transamidase subunit 16, putative (GPI16)               | 0,5365 | 1,132E-08  |
| TcCLB.509029.20  | hypothetical protein, conserved                             | 0,5365 | 1,008E-06  |
| TcCLB.508589.60  | hypothetical protein, conserved (pseudogene)                | 0,5362 | 0,01172    |
| TcCLB.511473.10  | retrotransposon hot spot protein (RHS, pseudogene), putat   | 0,536  | 0,001568   |
| TcCLB.510155.40  | DNA-damage inducible protein DDI1-like protein, putative    | 0,5358 | 2,255E-07  |
| TcCLB.506703.74  | mucin-associated surface protein (MASP, pseudogene), pu     | 0,5358 | 0,5329     |
| TcCLB.506973.90  | mucin-associated surface protein (MASP, pseudogene), pu     | 0,5352 | 0,1627     |
| TcCLB.510303.320 | dihydrofolate reductase-thymidylate synthase, putative      | 0,5351 | 0,0008355  |
| TcCLB.506835.60  | calmodulin, putative                                        | 0,535  | 0,00587    |
| TcCLB.511089.90  | mucin-associated surface protein (MASP), putative           | 0,535  | 0,5922     |
| TcCLB.478283.10  | hypothetical protein, conserved (pseudogene)                | 0,5348 | 0,004014   |
| TcCLB.506955.90  | trans-sialidase (pseudogene), putative                      | 0,5348 | 0,1752     |
| TcCLB.503761.40  | mucin-associated surface protein (MASP), putative           | 0,5346 | 0,05606    |
| TcCLB.506409.200 | mucin TcMUCII, putative                                     | 0,5346 | 0,2321     |
| TcCLB.506939.220 | mucin-associated surface protein (MASP), putative           | 0,5346 | 0,2691     |
| TcCLB.505051.10  | hypothetical protein, conserved                             | 0,5345 | 1,07E-20   |
| TcCLB.511287.20  | hypothetical protein, conserved                             | 0,5345 | 9,659E-06  |
| TcCLB.511099.210 | mucin TcMUCII, putative                                     | 0,5345 | 0,4097     |
| TcCLB.506337.210 | signal recognition particle receptor like protein, putative | 0,5344 | 3,033E-07  |
| TcCLB.505987.60  | hypothetical protein                                        | 0,5343 | 5,56E-10   |
| TcCLB.511087.19  | trans-sialidase, putative (fragment)                        | 0,5343 | 0,2842     |
| TcCLB.506539.10  | trans-sialidase (pseudogene), putative                      | 0,534  | 0,115      |
| TcCLB.511851.5   | trans-sialidase, putative                                   | 0,5333 | 0,2831     |
| TcCLB.510025.100 | mucin-associated surface protein (MASP), putative           | 0,533  | 0,05873    |
| TcCLB.510623.80  | trans-sialidase (pseudogene), putative                      | 0,533  | 0,1497     |
| TcCLB.505931.30  | trans-sialidase, Group I, putative                          | 0,5329 | 0,009646   |
| TcCLB.509529.60  | dispersed gene family protein 1 (DGF-1), putative           | 0,5327 | 0,0006738  |
| TcCLB.509109.140 | hypothetical protein, conserved                             | 0,5324 | 0,00003841 |
| TcCLB.510359.30  | hypothetical protein, conserved                             | 0,5324 | 0,002771   |

|                  |                                                            |        |            |
|------------------|------------------------------------------------------------|--------|------------|
| TcCLB.511711.40  | hypothetical protein, conserved                            | 0,5324 | 0,004498   |
| TcCLB.507851.20  | hypothetical protein, conserved                            | 0,5321 | 0,001217   |
| TcCLB.508799.200 | hypothetical protein, conserved                            | 0,532  | 0,05853    |
| TcCLB.509979.40  | hypothetical protein, conserved                            | 0,5319 | 0,00006167 |
| TcCLB.508895.80  | intraflagellar transport protein 52, putative (IFT52)      | 0,5318 | 3,724E-07  |
| TcCLB.511165.54  | pterin-4-alpha-carbinolamine dehydratase, putative         | 0,5318 | 0,0009013  |
| TcCLB.509307.10  | retrotransposon hot spot protein (RHS, pseudogene), putat  | 0,5317 | 0,001329   |
| TcCLB.509867.60  | mucin-associated surface protein (MASP), putative          | 0,5316 | 0,1713     |
| TcCLB.508961.40  | hypothetical protein, conserved                            | 0,5315 | 0,00006097 |
| TcCLB.511185.114 | mucin TcMUCII (pseudogene), putative                       | 0,5315 | 0,5186     |
| TcCLB.510741.150 | Present in the outer mitochondrial membrane proteome 7     | 0,5313 | 0,0001432  |
| TcCLB.508435.10  | mucin-associated surface protein (MASP), putative          | 0,5312 | 0,3044     |
| TcCLB.510323.60  | hypothetical protein                                       | 0,5311 | 0,001707   |
| TcCLB.511127.250 | hypothetical protein, conserved                            | 0,531  | 0,003685   |
| TcCLB.504253.40  | hypothetical protein, conserved                            | 0,5309 | 0,0001804  |
| TcCLB.508223.30  | retrotransposon hot spot protein (RHS, pseudogene), putat  | 0,5309 | 0,1375     |
| TcCLB.504163.20  | hypothetical protein, conserved                            | 0,5308 | 0,00002245 |
| TcCLB.511667.80  | trans-sialidase (pseudogene), putative                     | 0,5308 | 0,01459    |
| TcCLB.504221.9   | membrane associated protein, putative                      | 0,5307 | 0,00005389 |
| TcCLB.511063.120 | mucin TcMUCII, putative                                    | 0,5307 | 0,5692     |
| TcCLB.508881.150 | hypothetical protein, conserved                            | 0,5304 | 0,0003002  |
| TcCLB.509963.60  | hypothetical protein, conserved                            | 0,5302 | 0,01611    |
| TcCLB.503823.104 | UDP-N-acetylglucosamine-dolichyl-phosphate N-acetylgluc    | 0,5301 | 0,0003426  |
| TcCLB.504035.130 | hypothetical protein, conserved                            | 0,5301 | 0,00122    |
| TcCLB.506057.61  | elongation factor 1-gamma (EF-1-gamma, pseudogene), p      | 0,5301 | 0,1803     |
| TcCLB.510307.320 | retrotransposon hot spot protein (RHS, pseudogene), putat  | 0,5298 | 0,002694   |
| TcCLB.510417.30  | mucin TcMUCII, putative                                    | 0,5298 | 0,2575     |
| TcCLB.504229.70  | retrotransposon hot spot (RHS) protein, putative           | 0,5297 | 0,002104   |
| TcCLB.510713.70  | retrotransposon hot spot protein (RHS, pseudogene), putat  | 0,5296 | 0,005588   |
| TcCLB.511555.30  | hypothetical protein, conserved                            | 0,5294 | 0,003197   |
| TcCLB.506195.230 | hypothetical protein, conserved                            | 0,5289 | 0,0001127  |
| TcCLB.506223.60  | hypothetical protein, conserved                            | 0,5289 | 0,00158    |
| TcCLB.507711.330 | serine peptidase, putative                                 | 0,5288 | 0,0001758  |
| TcCLB.506871.20  | hypothetical protein, conserved                            | 0,5287 | 8,177E-07  |
| TcCLB.507825.40  | hypothetical protein, conserved                            | 0,5287 | 0,0001172  |
| TcCLB.504137.30  | hypothetical protein                                       | 0,5284 | 0,00000913 |
| TcCLB.507163.70  | trans-sialidase, Group V, putative                         | 0,5284 | 0,008484   |
| TcCLB.508231.230 | protein transport protein Sec23A, putative                 | 0,5283 | 0,002139   |
| TcCLB.510025.14  | hypothetical protein, conserved (pseudogene)               | 0,5282 | 0,5585     |
| TcCLB.506999.140 | hypothetical protein, conserved                            | 0,5277 | 3,712E-07  |
| TcCLB.410337.10  | trans-sialidase (pseudogene), putative                     | 0,5275 | 0,342      |
| TcCLB.508521.30  | beta galactofuranosyl glycosyltransferase (pseudogene), pi | 0,5274 | 0,022      |
| TcCLB.510275.10  | hypothetical protein                                       | 0,5273 | 0,008964   |
| TcCLB.508879.210 | hypothetical protein, conserved                            | 0,5272 | 0,0001307  |
| TcCLB.511361.40  | actin-related protein 2, putative                          | 0,5272 | 0,002161   |

|                  |                                                           |        |            |
|------------------|-----------------------------------------------------------|--------|------------|
| TcCLB.506823.100 | dispersed gene family protein 1 (DGF-1), putative         | 0,527  | 0,168      |
| TcCLB.510377.260 | mucin-associated surface protein (MASP), putative         | 0,527  | 0,5668     |
| TcCLB.506009.20  | hypothetical protein, conserved                           | 0,5268 | 1,132E-08  |
| TcCLB.511807.200 | hypothetical protein, conserved                           | 0,5267 | 8,321E-13  |
| TcCLB.510101.340 | hypothetical protein, conserved                           | 0,5267 | 2,305E-12  |
| TcCLB.505317.20  | hypothetical protein                                      | 0,5267 | 0,002199   |
| TcCLB.505075.30  | hypothetical protein, conserved                           | 0,5266 | 0,002654   |
| TcCLB.503893.130 | hypothetical protein, conserved                           | 0,5265 | 0,0005944  |
| TcCLB.504797.130 | hypothetical protein, conserved                           | 0,5265 | 0,01096    |
| TcCLB.507949.210 | trans-sialidase, Group II, putative                       | 0,5265 | 0,01965    |
| TcCLB.508285.20  | hypothetical protein, conserved (pseudogene)              | 0,5259 | 0,008732   |
| TcCLB.509099.30  | paraflagellar rod protein 5, putative (PFR5)              | 0,5258 | 0,00004346 |
| TcCLB.445557.10  | mucin TcMUCII, putative                                   | 0,5258 | 0,482      |
| TcCLB.511395.70  | hypothetical protein, conserved                           | 0,5256 | 0,0004678  |
| TcCLB.507677.80  | hypothetical protein, conserved                           | 0,5256 | 0,05656    |
| TcCLB.511089.74  | mucin TcMUCII (pseudogene), putative                      | 0,5254 | 0,436      |
| TcCLB.506279.19  | mucin-associated surface protein (MASP, pseudogene), pu   | 0,5253 | 0,06492    |
| TcCLB.506301.20  | Golgi reassembly stacking protein (GRASP homologue), pu   | 0,5251 | 0,00005507 |
| TcCLB.510287.10  | dynein light chain, putative                              | 0,5249 | 0,001818   |
| TcCLB.505183.124 | hypothetical protein, conserved                           | 0,5249 | 0,002729   |
| TcCLB.506825.90  | hypothetical protein, conserved                           | 0,5248 | 6,88E-09   |
| TcCLB.510819.4   | NADH-cytochrome b5 reductase, putative                    | 0,5248 | 0,0006653  |
| TcCLB.510155.30  | hypothetical protein, conserved                           | 0,5247 | 8,971E-08  |
| TcCLB.506529.425 | hypothetical protein                                      | 0,5246 | 0,295      |
| TcCLB.508227.30  | mucin TcMUCII, putative                                   | 0,5243 | 0,3513     |
| TcCLB.508153.650 | hypothetical protein, conserved (pseudogene)              | 0,5241 | 4,556E-06  |
| TcCLB.508909.190 | hypothetical protein, conserved                           | 0,524  | 0,00007748 |
| TcCLB.506629.180 | hypothetical protein, conserved                           | 0,5238 | 0,003751   |
| TcCLB.511317.79  | OSM3-like kinesin, putative                               | 0,5238 | 0,01105    |
| TcCLB.510197.190 | mucin-associated surface protein (MASP), putative         | 0,5238 | 0,223      |
| TcCLB.508081.10  | mucin-associated surface protein (MASP), putative         | 0,5238 | 0,7259     |
| TcCLB.506977.49  | ribosomal protein L36, putative                           | 0,5237 | 2,985E-10  |
| TcCLB.509527.200 | hypothetical protein                                      | 0,5236 | 0,1897     |
| TcCLB.511843.40  | dispersed gene family protein 1 (DGF-1), putative         | 0,5234 | 0,04605    |
| TcCLB.507547.59  | hypothetical protein, conserved                           | 0,5233 | 0,02938    |
| TcCLB.507835.35  | trans-sialidase (pseudogene), putative                    | 0,5232 | 0,1727     |
| TcCLB.510741.80  | riboflavin kinase, putative                               | 0,5231 | 0,003681   |
| TcCLB.510945.30  | actin, putative                                           | 0,5229 | 5,584E-06  |
| TcCLB.508973.110 | hypothetical protein, conserved                           | 0,5229 | 0,0004156  |
| TcCLB.506735.20  | hypothetical protein, conserved                           | 0,5228 | 0,0009093  |
| TcCLB.507445.9   | dispersed gene family protein 1 (DGF-1), putative (fragme | 0,5228 | 0,03039    |
| TcCLB.505949.100 | trans-sialidase (pseudogene), putative                    | 0,5226 | 0,008982   |
| TcCLB.503897.170 | citrate transporter, putative                             | 0,5225 | 0,001084   |
| TcCLB.508761.9   | mucin-associated surface protein (MASP, pseudogene), pu   | 0,5225 | 0,2522     |
| TcCLB.508241.100 | hypothetical protein                                      | 0,5224 | 1,293E-09  |

|                  |                                                           |        |            |
|------------------|-----------------------------------------------------------|--------|------------|
| TcCLB.506375.110 | (H )-ATPase G subunit, putative                           | 0,5224 | 2,471E-06  |
| TcCLB.416605.10  | mucin-associated surface protein (MASP), putative         | 0,5222 | 0,4046     |
| TcCLB.509815.50  | beta galactofuranosyl glycosyltransferase, putative       | 0,522  | 0,02098    |
| TcCLB.510807.10  | mucin TcMUCII, putative                                   | 0,5218 | 0,4112     |
| TcCLB.509237.60  | UDP-Gal or UDP-GlcNAc-dependent glycosyltransferase, pu   | 0,5217 | 0,002304   |
| TcCLB.508075.50  | hypothetical protein, conserved                           | 0,5216 | 0,0001262  |
| TcCLB.510227.20  | hypothetical protein                                      | 0,5216 | 0,0009275  |
| TcCLB.510533.190 | hypothetical protein, conserved                           | 0,5215 | 0,005854   |
| TcCLB.507991.20  | protein kinase, putative                                  | 0,5213 | 0,001227   |
| TcCLB.508221.52  | hypothetical protein                                      | 0,5213 | 0,3948     |
| TcCLB.437349.10  | hypothetical protein, conserved                           | 0,5212 | 0,01006    |
| TcCLB.510371.120 | mucin-associated surface protein (MASP), putative         | 0,5212 | 0,3567     |
| TcCLB.506789.200 | ubiquitin-conjugating enzyme E2, putative                 | 0,5211 | 4,381E-06  |
| TcCLB.510381.70  | hypothetical protein, conserved                           | 0,5211 | 0,005359   |
| TcCLB.506955.99  | mucin-associated surface protein (MASP), putative         | 0,5211 | 0,2283     |
| TcCLB.506833.60  | UV excision repair RAD23-like protein, putative           | 0,521  | 3,918E-07  |
| TcCLB.508479.110 | glutathionylspermidine synthase, putative                 | 0,5208 | 2,224E-08  |
| TcCLB.510283.140 | UDP-N-acetylglucosamine-dolichyl-phosphate N-acetylgluc   | 0,5206 | 0,00008383 |
| TcCLB.506775.160 | hypothetical protein, conserved                           | 0,5206 | 0,0001379  |
| TcCLB.506459.240 | elongation factor 1-gamma (EF-1-gamma), putative          | 0,5206 | 0,008636   |
| TcCLB.510053.60  | cytidine deaminase-like protein, putative                 | 0,5202 | 0,002855   |
| TcCLB.506673.20  | hypothetical protein, conserved                           | 0,5202 | 0,01592    |
| TcCLB.506645.9   | dispersed gene family protein 1 (DGF-1), putative         | 0,5202 | 0,01601    |
| TcCLB.506529.516 | ATP synthase subunit, putative                            | 0,5202 | 0,02126    |
| TcCLB.508081.90  | mucin-associated surface protein (MASP), putative         | 0,52   | 0,1469     |
| TcCLB.511693.40  | hypothetical protein, conserved                           | 0,5195 | 1,456E-08  |
| TcCLB.503591.10  | retrotransposon hot spot protein (RHS, pseudogene), putat | 0,5195 | 0,01779    |
| TcCLB.509875.80  | trans-sialidase, Group II, putative                       | 0,5192 | 0,1457     |
| TcCLB.505997.190 | retrotransposon hot spot protein (RHS, pseudogene), putat | 0,5189 | 0,001031   |
| TcCLB.506965.20  | mucin-associated surface protein (MASP), putative         | 0,5189 | 0,3835     |
| TcCLB.506269.90  | mucin TcMUCII, putative                                   | 0,5187 | 0,0475     |
| TcCLB.510055.60  | hypothetical protein, conserved                           | 0,5186 | 9,355E-09  |
| TcCLB.511267.24  | hypothetical protein, conserved                           | 0,5185 | 0,000258   |
| TcCLB.510879.80  | serine acetyltransferase, putative (SAT)                  | 0,5184 | 0,0002632  |
| TcCLB.503907.10  | trans-sialidase, Group VIII, putative                     | 0,5182 | 0,1372     |
| TcCLB.508991.10  | retrotransposon hot spot protein (RHS, pseudogene), putat | 0,5181 | 0,0004391  |
| TcCLB.509259.80  | hypothetical protein, conserved (pseudogene)              | 0,518  | 0,001935   |
| TcCLB.504005.20  | N-Acetyl-D-glucosaminylphosphatidylinositol de-N-acetyla: | 0,518  | 0,003325   |
| TcCLB.507881.90  | trans-sialidase (pseudogene), putative                    | 0,518  | 0,00477    |
| TcCLB.506195.300 | deoxyhypusine synthase, putative                          | 0,5177 | 9,773E-06  |
| TcCLB.503537.18  | retrotransposon hot spot protein (RHS, pseudogene), putat | 0,5173 | 0,1482     |
| TcCLB.511605.90  | mucin TcMUCII, putative                                   | 0,517  | 0,5102     |
| TcCLB.504899.20  | retrotransposon hot spot protein (RHS, pseudogene), putat | 0,5169 | 0,001669   |
| TcCLB.508479.220 | hypothetical protein, conserved                           | 0,5169 | 0,004459   |
| TcCLB.510625.88  | mucin-associated surface protein (MASP), putative         | 0,5169 | 0,5319     |

|                  |                                                               |        |            |
|------------------|---------------------------------------------------------------|--------|------------|
| TcCLB.508973.90  | Present in the outer mitochondrial membrane proteome 3:       | 0,5168 | 9,673E-06  |
| TcCLB.510025.170 | mucin TcMUCII, putative                                       | 0,5163 | 0,3354     |
| TcCLB.511367.159 | hypothetical protein, conserved (pseudogene)                  | 0,5162 | 0,007514   |
| TcCLB.506699.6   | hypothetical protein, conserved                               | 0,5162 | 0,01292    |
| TcCLB.508789.80  | mucin-associated surface protein (MASP), putative             | 0,5161 | 0,3581     |
| TcCLB.507091.4   | fucose kinase, putative                                       | 0,516  | 0,03547    |
| TcCLB.510835.30  | hypothetical protein, conserved                               | 0,5158 | 0,001935   |
| TcCLB.509991.80  | hypothetical protein, conserved                               | 0,5153 | 0,000853   |
| TcCLB.510557.30  | hypothetical protein                                          | 0,5153 | 0,3883     |
| TcCLB.508879.120 | hypothetical protein, conserved                               | 0,5152 | 0,0000188  |
| TcCLB.510761.76  | UDP-glucuronosyl and UDP-glucosyl transferase, putative       | 0,5152 | 0,0001388  |
| TcCLB.510635.30  | dispersed gene family protein 1 (DGF-1, pseudogene), putative | 0,5152 | 0,2186     |
| TcCLB.508977.99  | mucin-associated surface protein (MASP, pseudogene), putative | 0,5152 | 0,3785     |
| TcCLB.503663.20  | hypothetical protein, conserved                               | 0,5151 | 6,889E-07  |
| TcCLB.511827.110 | trans-sialidase, Group II, putative                           | 0,5151 | 0,00005903 |
| TcCLB.510729.290 | Enriched in surface-labeled proteome protein 19 (SLS3)        | 0,5149 | 0,00001053 |
| TcCLB.506615.75  | surface protease GP63 (pseudogene), putative                  | 0,5149 | 0,0001256  |
| TcCLB.510663.40  | hypothetical protein, conserved                               | 0,5148 | 0,0001386  |
| TcCLB.508889.19  | hypothetical protein                                          | 0,5146 | 0,001495   |
| TcCLB.506543.30  | hypothetical protein, conserved                               | 0,5146 | 0,1036     |
| TcCLB.508421.30  | tryptophanyl-tRNA synthetase (pseudogene), putative           | 0,5145 | 3,868E-10  |
| TcCLB.508083.10  | Present in the outer mitochondrial membrane proteome 1:       | 0,5145 | 5,858E-07  |
| TcCLB.508261.130 | mucin-associated surface protein (MASP), putative             | 0,5145 | 0,2857     |
| TcCLB.463901.10  | trans-sialidase, putative (fragment)                          | 0,5144 | 0,06375    |
| TcCLB.510729.115 | hypothetical protein                                          | 0,5143 | 0,0004664  |
| TcCLB.506127.150 | hypothetical protein, conserved                               | 0,5142 | 2,97E-07   |
| TcCLB.511733.50  | hypothetical protein, conserved                               | 0,5141 | 0,00000239 |
| TcCLB.504149.117 | hypothetical protein, conserved                               | 0,5139 | 0,0001157  |
| TcCLB.511731.70  | hypothetical protein, conserved                               | 0,5135 | 0,006183   |
| TcCLB.507611.50  | hypothetical protein, conserved                               | 0,5134 | 0,366      |
| TcCLB.507159.70  | hypothetical protein, conserved                               | 0,5133 | 0,00006359 |
| TcCLB.511151.54  | surface protease GP63, putative                               | 0,5133 | 0,0003807  |
| TcCLB.511395.50  | hypothetical protein, conserved                               | 0,5133 | 0,0006028  |
| TcCLB.481099.9   | dispersed gene family protein 1 (DGF-1), putative (fragment)  | 0,5133 | 0,1294     |
| TcCLB.506913.10  | hypothetical protein, conserved                               | 0,513  | 0,02579    |
| TcCLB.506775.80  | 14-3-3 protein 2, putative (14-3-3-II)                        | 0,5127 | 2,635E-12  |
| TcCLB.511029.10  | enolase, putative                                             | 0,5124 | 0,0004664  |
| TcCLB.507725.9   | dispersed gene family protein 1 (DGF-1, pseudogene), putative | 0,5124 | 0,003514   |
| TcCLB.511593.70  | mucin TcMUCII, putative                                       | 0,5121 | 0,3964     |
| TcCLB.506851.10  | NIMA-related kinase, putative                                 | 0,512  | 6,895E-09  |
| TcCLB.508813.80  | hypothetical protein, conserved                               | 0,512  | 6,052E-06  |
| TcCLB.509877.10  | hypothetical protein, conserved                               | 0,512  | 0,000699   |
| TcCLB.506475.110 | hypothetical protein                                          | 0,5119 | 0,04923    |
| TcCLB.511509.50  | hypothetical protein, conserved                               | 0,5116 | 0,00001164 |
| TcCLB.507071.310 | mucin-associated surface protein (MASP), putative             | 0,5116 | 0,3425     |

|                  |                                                           |        |            |
|------------------|-----------------------------------------------------------|--------|------------|
| TcCLB.506999.30  | hypothetical protein, conserved                           | 0,5113 | 3,674E-06  |
| TcCLB.511827.10  | hypothetical protein, conserved                           | 0,5112 | 0,08645    |
| TcCLB.506135.70  | hypothetical protein, conserved                           | 0,511  | 0,0004996  |
| TcCLB.507511.50  | hypothetical protein                                      | 0,511  | 0,02513    |
| TcCLB.503587.80  | mucin-associated surface protein (MASP, pseudogene), pu   | 0,5109 | 0,302      |
| TcCLB.506801.20  | mucin-like glycoprotein, putative                         | 0,5107 | 0,09821    |
| TcCLB.509601.44  | hypothetical protein, conserved                           | 0,5105 | 0,00000224 |
| TcCLB.504125.64  | hypothetical protein                                      | 0,5105 | 0,00007001 |
| TcCLB.510105.70  | hypothetical protein, conserved                           | 0,5105 | 0,005995   |
| TcCLB.507039.20  | GDP-mannose 4,6 dehydratase (pseudogene), putative        | 0,5104 | 0,00453    |
| TcCLB.509615.10  | hypothetical protein, conserved                           | 0,5101 | 0,006784   |
| TcCLB.510515.20  | hypothetical protein, conserved (pseudogene)              | 0,51   | 8,601E-06  |
| TcCLB.510411.10  | trans-sialidase, Group II, putative                       | 0,5099 | 0,05175    |
| TcCLB.503645.10  | mucin-associated surface protein (MASP), putative         | 0,5098 | 0,2594     |
| TcCLB.511451.59  | mucin-associated surface protein (MASP), putative         | 0,5098 | 0,4064     |
| TcCLB.509207.110 | hypothetical protein, conserved                           | 0,5097 | 0,001666   |
| TcCLB.410943.10  | hypothetical protein, conserved                           | 0,5096 | 0,1457     |
| TcCLB.511731.5   | cationic amino acid transporter (pseudogene), putative    | 0,5095 | 0,1622     |
| TcCLB.508171.10  | trans-sialidase, Group VIII, putative                     | 0,5094 | 0,1222     |
| TcCLB.506829.90  | conserved protein                                         | 0,509  | 3,643E-10  |
| TcCLB.510055.160 | protein kinase, putative                                  | 0,509  | 0,09678    |
| TcCLB.511255.630 | mucin-associated surface protein (MASP), putative         | 0,509  | 0,3637     |
| TcCLB.504149.110 | GTP-binding protein, putative                             | 0,5089 | 0,00001375 |
| TcCLB.511625.30  | hypothetical protein, conserved                           | 0,5088 | 0,002221   |
| TcCLB.508515.10  | hypothetical protein, conserved                           | 0,5086 | 0,0109     |
| TcCLB.506449.30  | retrotransposon hot spot protein (RHS, pseudogene), putat | 0,5086 | 0,1432     |
| TcCLB.506267.70  | mucin-associated surface protein (MASP), putative         | 0,5085 | 0,3091     |
| TcCLB.506925.450 | hypothetical protein, conserved                           | 0,5083 | 4,873E-06  |
| TcCLB.506653.50  | elongation factor 1-gamma (EF-1-gamma, pseudogene), p     | 0,5083 | 0,2823     |
| TcCLB.504149.40  | tatD related deoxyribonuclease, putative                  | 0,5081 | 1,098E-07  |
| TcCLB.507059.80  | glutamine-dependent carbamoyl-phosphate synthetase, pu    | 0,508  | 0,00001414 |
| TcCLB.508723.50  | hypothetical protein, conserved                           | 0,5078 | 0,00003325 |
| TcCLB.507851.10  | hypothetical protein, conserved                           | 0,5076 | 0,00003632 |
| TcCLB.509631.100 | hypothetical protein, conserved (pseudogene)              | 0,5074 | 0,3935     |
| TcCLB.510839.11  | hypothetical protein                                      | 0,507  | 0,02466    |
| TcCLB.508231.20  | 40S ribosomal protein S12, putative                       | 0,5069 | 4,95E-11   |
| TcCLB.504469.20  | hypothetical protein (fragment)                           | 0,5069 | 0,09279    |
| TcCLB.506779.50  | proteasome beta 3 subunit, putative                       | 0,5068 | 0,00001894 |
| TcCLB.506321.50  | mucin-associated surface protein (MASP), putative         | 0,5068 | 0,005981   |
| TcCLB.403153.10  | receptor-type adenylate cyclase (pseudogene), putative    | 0,5067 | 0,07519    |
| TcCLB.511221.20  | hypothetical protein                                      | 0,5067 | 0,1375     |
| TcCLB.511807.10  | hypothetical protein, conserved (pseudogene)              | 0,506  | 5,544E-08  |
| TcCLB.506501.184 | mucin-associated surface protein (MASP, pseudogene), pu   | 0,5059 | 0,3986     |
| TcCLB.510303.70  | hypothetical protein, conserved                           | 0,5057 | 0,00001502 |
| TcCLB.506757.60  | trans-sialidase, Group V, putative                        | 0,5057 | 0,0002947  |



|                  |                                                           |        |            |
|------------------|-----------------------------------------------------------|--------|------------|
| TcCLB.511717.110 | hypothetical protein, conserved                           | 0,5055 | 0,001464   |
| TcCLB.448661.20  | mucin TcMUCII, putative                                   | 0,5055 | 0,363      |
| TcCLB.507067.50  | mucin TcMUCII (pseudogene), putative                      | 0,5055 | 0,4213     |
| TcCLB.509437.140 | retrotransposon hot spot protein (RHS, pseudogene), putat | 0,5054 | 0,05357    |
| TcCLB.509467.20  | hypothetical protein, conserved (pseudogene)              | 0,5054 | 0,2354     |
| TcCLB.508153.100 | acyltransferase, putative                                 | 0,5049 | 0,0003938  |
| TcCLB.511593.60  | mucin-associated surface protein (MASP), putative         | 0,5049 | 0,1302     |
| TcCLB.418613.20  | mucin-associated surface protein (MASP), putative (fragm  | 0,5049 | 0,4785     |
| TcCLB.509011.60  | hypothetical protein, conserved                           | 0,5048 | 0,00001384 |
| TcCLB.511245.30  | ion transport protein, putative                           | 0,5047 | 0,0004615  |
| TcCLB.511817.70  | hypothetical protein, conserved                           | 0,5047 | 0,008136   |
| TcCLB.504239.10  | hypothetical protein, conserved (pseudogene)              | 0,5047 | 0,4493     |
| TcCLB.511185.100 | mucin-associated surface protein (MASP), putative         | 0,5047 | 0,6013     |
| TcCLB.511001.50  | hypothetical protein, conserved                           | 0,5046 | 0,0003816  |
| TcCLB.504343.30  | retrotransposon hot spot (RHS) protein, putative          | 0,5046 | 0,01153    |
| TcCLB.510123.70  | vesicle-associated membrane protein, putative             | 0,5042 | 0,0002166  |
| TcCLB.506599.240 | mucin-associated surface protein (MASP), putative         | 0,5042 | 0,07693    |
| TcCLB.510861.150 | hypothetical protein                                      | 0,5041 | 1,388E-08  |
| TcCLB.506173.150 | hypothetical protein                                      | 0,5041 | 0,1981     |
| TcCLB.506559.300 | twinfilin, putative                                       | 0,5037 | 1,925E-08  |
| TcCLB.507559.50  | kinesin, putative                                         | 0,5034 | 0,0004174  |
| TcCLB.510157.10  | mucin-associated surface protein (MASP), putative         | 0,5029 | 0,2063     |
| TcCLB.508051.30  | protein kinase, putative                                  | 0,5028 | 0,00009538 |
| TcCLB.510311.30  | hypothetical protein, conserved                           | 0,5027 | 8,566E-06  |
| TcCLB.511221.35  | retrotransposon hot spot protein (RHS, pseudogene), putat | 0,5027 | 0,004953   |
| TcCLB.509763.20  | hypothetical protein                                      | 0,5023 | 0,01416    |
| TcCLB.511557.20  | hypothetical protein, conserved                           | 0,5022 | 0,003097   |
| TcCLB.506989.309 | hypothetical protein, conserved                           | 0,502  | 5,012E-06  |
| TcCLB.510353.20  | hypothetical protein, conserved                           | 0,5018 | 0,00003115 |
| TcCLB.510421.200 | hypothetical protein, conserved                           | 0,5017 | 0,0001093  |
| TcCLB.507253.10  | retrotransposon hot spot (RHS) protein, putative          | 0,5017 | 0,007548   |
| TcCLB.508221.199 | elongation factor 1-gamma (EF-1-gamma), putative          | 0,5017 | 0,324      |
| TcCLB.484097.10  | trans-sialidase, putative (fragment)                      | 0,5016 | 0,03882    |
| TcCLB.509001.40  | calpain-like cysteine peptidase, putative                 | 0,5015 | 9,647E-08  |
| TcCLB.506583.50  | hypothetical protein, conserved                           | 0,5015 | 0,0009256  |
| TcCLB.504031.20  | surface protease GP63 (pseudogene), putative              | 0,5013 | 0,2808     |
| TcCLB.508403.20  | hypothetical protein, conserved (pseudogene)              | 0,5012 | 0,00002559 |
| TcCLB.508699.80  | hypothetical protein, conserved                           | 0,501  | 0,0002855  |
| TcCLB.503903.79  | hypothetical protein                                      | 0,501  | 0,001381   |
| TcCLB.508413.20  | hypothetical protein, conserved                           | 0,5006 | 0,0001114  |
| TcCLB.508827.40  | acyl-CoA dehydrogenase, putative                          | 0,5003 | 0,0008433  |
| TcCLB.508593.10  | trans-sialidase, Group IV, putative                       | 0,5002 | 0,01119    |
| TcCLB.508331.20  | hypothetical protein, conserved                           | 0,4999 | 8,665E-10  |
| TcCLB.506743.20  | hypothetical protein, conserved                           | 0,4999 | 0,04279    |
| TcCLB.506791.70  | nitroreductase                                            | 0,4998 | 0,0003286  |

|                  |                                                               |        |           |
|------------------|---------------------------------------------------------------|--------|-----------|
| TcCLB.503923.20  | hypothetical protein, conserved                               | 0,4998 | 0,008194  |
| TcCLB.508625.150 | L-ribulokinase, putative                                      | 0,4997 | 0,008643  |
| TcCLB.508479.250 | membrane-bound acid phosphatase 2, putative                   | 0,4996 | 2,399E-06 |
| TcCLB.506403.9   | hypothetical protein, conserved (fragment)                    | 0,4995 | 2,342E-06 |
| TcCLB.509957.20  | expression site-associated gene (ESAG-like) protein, putative | 0,4995 | 0,4284    |
| TcCLB.507643.30  | retrotransposon hot spot protein (RHS, pseudogene), putative  | 0,4993 | 0,0006005 |
| TcCLB.504717.30  | hypothetical protein, conserved                               | 0,4993 | 0,001834  |
| TcCLB.510091.50  | hypothetical protein, conserved                               | 0,4991 | 0,0003555 |
| TcCLB.503465.49  | mitochondrial processing peptidase, beta subunit, putative    | 0,4991 | 0,002924  |
| TcCLB.506811.180 | protein kinase, putative                                      | 0,4991 | 0,04447   |
| TcCLB.508121.56  | mucin-associated surface protein (MASP, pseudogene), putative | 0,499  | 0,3365    |
| TcCLB.504445.20  | retrotransposon hot spot protein (RHS, pseudogene), putative  | 0,4986 | 0,001916  |
| TcCLB.510359.60  | hypothetical protein, conserved                               | 0,4986 | 0,004221  |
| TcCLB.507957.270 | mucin TcMUCl, putative                                        | 0,4985 | 0,2761    |
| TcCLB.510901.90  | ATPase protein, putative                                      | 0,4983 | 0,00402   |
| TcCLB.506609.80  | mucin TcMUCII, putative                                       | 0,4981 | 0,4172    |
| TcCLB.507295.61  | elongation factor 1-gamma (EF-1-gamma, pseudogene), putative  | 0,498  | 0,2924    |
| TcCLB.511045.50  | hypothetical protein, conserved                               | 0,4977 | 0,006725  |
| TcCLB.508917.30  | kinesin, putative                                             | 0,4975 | 2,602E-06 |
| TcCLB.511603.20  | mucin TcMUCII, putative                                       | 0,4974 | 0,4005    |
| TcCLB.506171.20  | hypothetical protein, conserved (pseudogene)                  | 0,4973 | 0,007768  |
| TcCLB.511915.20  | trans-sialidase (pseudogene), putative                        | 0,4971 | 0,02544   |
| TcCLB.504033.170 | tyrosine phosphatase, putative                                | 0,497  | 0,001239  |
| TcCLB.508221.610 | elongation factor 1-gamma (EF-1-gamma), putative              | 0,497  | 0,4194    |
| TcCLB.507019.10  | protein kinase, putative                                      | 0,4968 | 0,0002057 |
| TcCLB.503479.60  | surface protease GP63, putative                               | 0,4967 | 0,01142   |
| TcCLB.510715.30  | mucin-associated surface protein (MASP), putative             | 0,4967 | 0,1067    |
| TcCLB.506833.70  | cationic amino acid transporter, putative                     | 0,4966 | 0,0003537 |
| TcCLB.505941.40  | hypothetical protein, conserved                               | 0,4965 | 0,004478  |
| TcCLB.508421.20  | dispersed gene family protein 1 (DGF-1, pseudogene), putative | 0,4965 | 0,07249   |
| TcCLB.507517.10  | hypothetical protein, conserved                               | 0,4962 | 0,0001751 |
| TcCLB.511231.40  | hypothetical protein, conserved                               | 0,4961 | 0,03836   |
| TcCLB.507669.190 | hypothetical protein, conserved                               | 0,496  | 0,0008875 |
| TcCLB.503439.40  | trans-sialidase (pseudogene), putative                        | 0,4959 | 0,003227  |
| TcCLB.506517.149 | hypothetical protein, conserved                               | 0,4958 | 0,000101  |
| TcCLB.511385.110 | hypothetical protein                                          | 0,4958 | 0,006258  |
| TcCLB.507071.220 | mucin-associated surface protein (MASP, pseudogene), putative | 0,4957 | 0,3281    |
| TcCLB.506559.210 | hypothetical protein, conserved                               | 0,4956 | 0,0003816 |
| TcCLB.503977.79  | elongation factor 1-gamma (EF-1-gamma), putative              | 0,4954 | 0,4858    |
| TcCLB.510857.50  | lipoate-protein ligase, putative                              | 0,4953 | 0,0007537 |
| TcCLB.510687.30  | hypothetical protein, conserved                               | 0,4952 | 2,144E-08 |
| TcCLB.508515.170 | retrotransposon hot spot protein (RHS, pseudogene), putative  | 0,4952 | 0,001464  |
| TcCLB.510535.50  | hypothetical protein                                          | 0,4952 | 0,01421   |
| TcCLB.430895.10  | hypothetical protein, conserved                               | 0,4952 | 0,02835   |
| TcCLB.508011.90  | trans-sialidase (pseudogene), putative                        | 0,4952 | 0,1574    |

|                  |                                                            |        |            |
|------------------|------------------------------------------------------------|--------|------------|
| TcCLB.510477.100 | mucin-associated surface protein (MASP), putative          | 0,495  | 0,2774     |
| TcCLB.506787.19  | mucin-associated surface protein (MASP, pseudogene), pu    | 0,4948 | 0,5332     |
| TcCLB.507795.10  | membrane associated protein, putative                      | 0,4946 | 1,887E-06  |
| TcCLB.507503.70  | retrotransposon hot spot protein (RHS, pseudogene), putat  | 0,4946 | 0,005133   |
| TcCLB.509875.230 | hypothetical protein, conserved                            | 0,4944 | 0,000521   |
| TcCLB.511661.120 | protein kinase, putative                                   | 0,494  | 2,192E-07  |
| TcCLB.510947.20  | hypothetical protein, conserved                            | 0,494  | 0,00004093 |
| TcCLB.511071.140 | 2-amino-3-ketobutyrate coenzyme A ligase, putative         | 0,4935 | 0,0009115  |
| TcCLB.506925.480 | ribokinase, putative                                       | 0,4934 | 0,0002573  |
| TcCLB.508919.130 | hypothetical protein, conserved                            | 0,4933 | 0,0006314  |
| TcCLB.510459.20  | mucin-associated surface protein (MASP), putative          | 0,4932 | 0,2479     |
| TcCLB.511825.90  | hypothetical protein, conserved                            | 0,4931 | 0,009293   |
| TcCLB.508001.10  | dispersed gene family protein 1 (DGF-1), putative          | 0,4931 | 0,05071    |
| TcCLB.506855.160 | hypothetical protein, conserved                            | 0,4928 | 3,888E-08  |
| TcCLB.506753.210 | hypothetical protein, conserved                            | 0,4927 | 0,00902    |
| TcCLB.506559.550 | C2 domain containing protein, putative                     | 0,4924 | 3,182E-06  |
| TcCLB.511221.50  | mucin-associated surface protein (MASP), putative          | 0,4924 | 0,08797    |
| TcCLB.510561.50  | mucin-associated surface protein (MASP), putative          | 0,4924 | 0,6407     |
| TcCLB.509891.60  | hypothetical protein, conserved                            | 0,4923 | 0,0009013  |
| TcCLB.506939.10  | mucin-associated surface protein (MASP, pseudogene), pu    | 0,4923 | 0,5134     |
| TcCLB.503769.20  | trans-sialidase (pseudogene), putative                     | 0,4921 | 0,3235     |
| TcCLB.506829.39  | ribosomal protein S7, putative                             | 0,4911 | 6,315E-12  |
| TcCLB.506869.10  | hypothetical protein                                       | 0,491  | 0,004185   |
| TcCLB.504411.5   | hypothetical protein, conserved (fragment)                 | 0,491  | 0,5166     |
| TcCLB.509349.20  | retrotransposon hot spot (RHS) protein, putative           | 0,4909 | 0,0001104  |
| TcCLB.509645.30  | hypothetical protein, conserved                            | 0,4908 | 0,00147    |
| TcCLB.510275.80  | trans-sialidase (pseudogene), putative                     | 0,4907 | 0,1765     |
| TcCLB.509161.40  | centrin, putative                                          | 0,4906 | 0,002683   |
| TcCLB.481211.30  | mucin TcMUCII, putative                                    | 0,4905 | 0,07238    |
| TcCLB.506289.130 | hypothetical protein                                       | 0,4904 | 0,1762     |
| TcCLB.508109.14  | mucin TcMUCII, putative                                    | 0,4904 | 0,302      |
| TcCLB.506891.30  | leucine-rich repeat-containing protein                     | 0,4902 | 0,01581    |
| TcCLB.506501.177 | hypothetical protein, conserved (pseudogene)               | 0,4902 | 0,4985     |
| TcCLB.506915.20  | hypothetical protein                                       | 0,4901 | 0,00003967 |
| TcCLB.504741.40  | hypothetical protein, conserved                            | 0,49   | 0,0014     |
| TcCLB.507691.31  | hypothetical protein                                       | 0,4899 | 0,04016    |
| TcCLB.507237.120 | mucin-associated surface protein (MASP), putative          | 0,4899 | 0,2922     |
| TcCLB.510095.40  | retrotransposon hot spot protein (RHS, pseudogene), putat  | 0,4898 | 0,009855   |
| TcCLB.505365.80  | retrotransposon hot spot protein (RHS, pseudogene), putat  | 0,4897 | 0,04643    |
| TcCLB.511337.10  | hypothetical protein, conserved                            | 0,4894 | 0,000268   |
| TcCLB.506529.370 | hypothetical protein                                       | 0,4894 | 0,02125    |
| TcCLB.504189.10  | beta galactofuranosyl glycosyltransferase (pseudogene), pi | 0,4894 | 0,3094     |
| TcCLB.505183.60  | hypothetical protein, conserved                            | 0,4889 | 0,00003127 |
| TcCLB.507085.110 | hypothetical protein                                       | 0,4889 | 0,1516     |
| TcCLB.503879.50  | hypothetical protein, conserved                            | 0,4888 | 0,001205   |

|                  |                                                           |        |           |
|------------------|-----------------------------------------------------------|--------|-----------|
| TcCLB.506213.60  | 40S ribosomal protein S2, putative                        | 0,4884 | 0,2681    |
| TcCLB.510475.100 | mucin-associated surface protein (MASP), putative         | 0,4882 | 0,1263    |
| TcCLB.510483.30  | trans-sialidase (pseudogene), putative                    | 0,488  | 0,1608    |
| TcCLB.507991.70  | hypothetical protein, conserved                           | 0,4878 | 0,00233   |
| TcCLB.504229.4   | retrotransposon hot spot (RHS) protein, putative          | 0,4877 | 0,009599  |
| TcCLB.510877.160 | hypothetical protein, conserved                           | 0,4876 | 0,0001126 |
| TcCLB.509967.50  | hypothetical protein, conserved                           | 0,4875 | 0,01517   |
| TcCLB.510487.79  | mucin-associated surface protein (MASP), putative         | 0,4873 | 0,2934    |
| TcCLB.510643.110 | beta galactofuranosyl glycosyltransferase, putative       | 0,4871 | 0,01918   |
| TcCLB.506393.80  | trans-sialidase (pseudogene), putative                    | 0,4871 | 0,4495    |
| TcCLB.506279.160 | mucin-associated surface protein (MASP, pseudogene), pu   | 0,4869 | 0,3482    |
| TcCLB.508649.20  | hypothetical protein, conserved                           | 0,4868 | 1,289E-08 |
| TcCLB.509163.110 | retrotransposon hot spot (RHS) protein, putative          | 0,4868 | 0,06482   |
| TcCLB.506885.204 | hypothetical protein, conserved                           | 0,4865 | 2,715E-07 |
| TcCLB.510155.130 | hypothetical protein, conserved                           | 0,4863 | 1,707E-07 |
| TcCLB.511649.90  | hypothetical protein, conserved                           | 0,4861 | 0,0002291 |
| TcCLB.509265.110 | trans-sialidase, Group IV, putative                       | 0,486  | 0,04355   |
| TcCLB.506455.10  | retrotransposon hot spot protein (RHS, pseudogene), putat | 0,4853 | 0,06728   |
| TcCLB.508779.30  | synaptobrevin, putative                                   | 0,485  | 0,0001967 |
| TcCLB.511167.20  | hypothetical protein, conserved                           | 0,485  | 0,0005125 |
| TcCLB.507045.10  | retrotransposon hot spot protein (RHS, pseudogene), putat | 0,485  | 0,01036   |
| TcCLB.505997.40  | hypothetical protein, conserved (pseudogene)              | 0,4847 | 0,004907  |
| TcCLB.506419.30  | hypothetical protein, conserved                           | 0,4847 | 0,02256   |
| TcCLB.506685.5   | trans-sialidase (pseudogene), putative                    | 0,4841 | 0,01354   |
| TcCLB.507059.20  | trans-sialidase, Group V, putative                        | 0,4841 | 0,05746   |
| TcCLB.506295.120 | Trk system potassium uptake protein (HKT1)                | 0,484  | 0,002683  |
| TcCLB.510357.160 | hypothetical protein, conserved (fragment)                | 0,484  | 0,1418    |
| TcCLB.511181.160 | choline/ethanolamine kinase (pseudogene), putative        | 0,4838 | 0,001079  |
| TcCLB.504003.80  | hypothetical protein, conserved                           | 0,4837 | 0,133     |
| TcCLB.506437.40  | tuzin                                                     | 0,4835 | 1,087E-07 |
| TcCLB.505363.19  | trans-sialidase, putative                                 | 0,4834 | 0,00811   |
| TcCLB.506579.60  | hypothetical protein, conserved                           | 0,483  | 0,002728  |
| TcCLB.508271.20  | hypothetical protein, conserved                           | 0,4829 | 0,002519  |
| TcCLB.510557.73  | mucin-associated surface protein (MASP, pseudogene), pu   | 0,4829 | 0,2581    |
| TcCLB.506795.44  | hypothetical protein, conserved                           | 0,4827 | 3,107E-06 |
| TcCLB.506865.70  | hypothetical protein, conserved                           | 0,4827 | 7,463E-06 |
| TcCLB.511107.5   | mucin TcMUCII, putative                                   | 0,4826 | 0,0671    |
| TcCLB.507075.40  | mucin-associated surface protein (MASP), putative (fragm  | 0,4825 | 0,1838    |
| TcCLB.511249.34  | hypothetical protein, conserved                           | 0,4824 | 0,002529  |
| TcCLB.509093.10  | mucin-associated surface protein (MASP), putative         | 0,4823 | 0,399     |
| TcCLB.506057.81  | mucin-associated surface protein (MASP, pseudogene), pu   | 0,4822 | 0,00735   |
| TcCLB.503779.30  | hypothetical protein, conserved                           | 0,482  | 0,007078  |
| TcCLB.511907.30  | hypothetical protein, conserved                           | 0,4818 | 8,801E-06 |
| TcCLB.510025.250 | trans-sialidase (pseudogene), putative                    | 0,4817 | 0,1059    |
| TcCLB.510359.630 | retrotransposon hot spot protein (RHS, pseudogene), putat | 0,4817 | 0,2103    |

|                  |                                                           |        |            |
|------------------|-----------------------------------------------------------|--------|------------|
| TcCLB.504899.30  | hypothetical protein                                      | 0,4815 | 0,0253     |
| TcCLB.508969.30  | retrotransposon hot spot protein (RHS, pseudogene), putat | 0,4809 | 0,05178    |
| TcCLB.506789.120 | hypothetical protein, conserved                           | 0,4808 | 4,094E-06  |
| TcCLB.507891.20  | flagellar calcium-binding-like protein, putative          | 0,4808 | 0,001033   |
| TcCLB.504165.20  | hypothetical protein, conserved                           | 0,4808 | 0,002763   |
| TcCLB.508649.10  | beta propeller protein, putative                          | 0,4806 | 0,00003642 |
| TcCLB.504167.20  | mucin TcMUCI, putative                                    | 0,4803 | 0,02456    |
| TcCLB.511807.110 | GMP synthase [glutamine-hydrolysing] (Gmps)               | 0,48   | 4,936E-09  |
| TcCLB.508039.90  | phosphoinositide-specific phospholipase C (pseudogene), p | 0,48   | 0,008417   |
| TcCLB.506139.80  | mucin TcMUCII, putative                                   | 0,4798 | 0,5052     |
| TcCLB.506965.100 | mucin-associated surface protein (MASP), putative         | 0,4797 | 0,322      |
| TcCLB.510661.90  | ATP-dependent RNA helicase, putative                      | 0,4796 | 4,766E-07  |
| TcCLB.509411.10  | trans-sialidase, Group II, putative                       | 0,4796 | 0,371      |
| TcCLB.458015.10  | hypothetical protein, conserved                           | 0,4795 | 0,00003492 |
| TcCLB.511401.130 | mucin-associated surface protein (MASP, pseudogene), pu   | 0,4795 | 0,2254     |
| TcCLB.510657.50  | hypothetical protein, conserved                           | 0,4794 | 0,005082   |
| TcCLB.506389.20  | trans-sialidase (pseudogene), putative                    | 0,4794 | 0,03894    |
| TcCLB.504149.20  | ATP-binding cassette transporter ABCA1, putative (ABCA1)  | 0,4793 | 0,0003983  |
| TcCLB.509979.140 | hypothetical protein, conserved                           | 0,4793 | 0,0005663  |
| TcCLB.511127.300 | hypothetical protein, conserved                           | 0,479  | 0,194      |
| TcCLB.511393.20  | rhomboid-like protein, putative                           | 0,4789 | 0,0001868  |
| TcCLB.506661.10  | fatty acid elongase, putative                             | 0,4788 | 0,005445   |
| TcCLB.511385.90  | hypothetical protein, conserved                           | 0,4785 | 4,491E-07  |
| TcCLB.510861.14  | hypothetical protein, conserved (fragment)                | 0,4785 | 2,918E-06  |
| TcCLB.506289.70  | hypothetical protein, conserved                           | 0,4785 | 0,0000158  |
| TcCLB.508501.165 | U6 snRNA-associated Sm-like protein LSm6p                 | 0,4781 | 0,08951    |
| TcCLB.506513.50  | protein kinase, putative                                  | 0,478  | 0,0001916  |
| TcCLB.509027.50  | hypothetical protein, conserved                           | 0,4779 | 0,01305    |
| TcCLB.511311.20  | trans-sialidase, Group II, putative                       | 0,4777 | 0,08136    |
| TcCLB.507731.60  | trans-sialidase, putative                                 | 0,4777 | 0,2965     |
| TcCLB.508119.90  | surface protease GP63 (pseudogene), putative              | 0,4774 | 0,00003953 |
| TcCLB.509337.28  | hypothetical protein, conserved (pseudogene)              | 0,4773 | 0,0004723  |
| TcCLB.509461.20  | hypothetical protein, conserved                           | 0,4773 | 0,009561   |
| TcCLB.503815.10  | alkyl-dihydroxyacetone phosphate synthase, putative       | 0,4772 | 1,027E-09  |
| TcCLB.509153.40  | hypothetical protein, conserved                           | 0,4772 | 3,252E-07  |
| TcCLB.508649.14  | hypothetical protein, conserved                           | 0,4772 | 0,000502   |
| TcCLB.508161.23  | hypothetical protein                                      | 0,4771 | 0,5264     |
| TcCLB.510751.10  | poly(A)-specific ribonuclease PARN, putative              | 0,477  | 0,00009734 |
| TcCLB.503401.11  | retrotransposon hot spot (RHS) protein, putative (fragmen | 0,477  | 0,3992     |
| TcCLB.506613.40  | trans-sialidase, Group V, putative                        | 0,4767 | 0,1218     |
| TcCLB.511683.30  | hypothetical protein, conserved                           | 0,4766 | 0,0001678  |
| TcCLB.507647.39  | hypothetical protein, conserved                           | 0,4766 | 0,0274     |
| TcCLB.508097.81  | mucin TcMUCII, putative                                   | 0,4765 | 0,3179     |
| TcCLB.507895.160 | hypothetical protein, conserved                           | 0,4764 | 0,0105     |
| TcCLB.506159.10  | retrotransposon hot spot protein (RHS, pseudogene), putat | 0,4764 | 0,01275    |

|                  |                                                               |        |            |
|------------------|---------------------------------------------------------------|--------|------------|
| TcCLB.503715.40  | protein kinase, putative                                      | 0,4763 | 0,1056     |
| TcCLB.511401.100 | mucin-associated surface protein (MASP), putative             | 0,4754 | 0,1022     |
| TcCLB.510809.10  | mucin TcMUCII, putative                                       | 0,4749 | 0,3165     |
| TcCLB.508713.20  | hypothetical protein, conserved                               | 0,4748 | 0,001513   |
| TcCLB.510713.110 | mucin-associated surface protein (MASP), putative             | 0,4745 | 0,351      |
| TcCLB.510887.64  | hypothetical protein, conserved                               | 0,4744 | 0,02749    |
| TcCLB.506425.50  | hypothetical protein, conserved                               | 0,4743 | 0,0001243  |
| TcCLB.510241.5   | hypothetical protein                                          | 0,4743 | 0,0003562  |
| TcCLB.508307.134 | hypothetical protein, conserved                               | 0,4743 | 0,003733   |
| TcCLB.510351.50  | hypothetical protein, conserved                               | 0,4741 | 0,0002675  |
| TcCLB.504259.10  | hypothetical protein, conserved                               | 0,4741 | 0,1489     |
| TcCLB.511071.10  | hypothetical protein, conserved                               | 0,474  | 0,00006868 |
| TcCLB.510719.20  | short-chain dehydrogenase, putative                           | 0,4738 | 0,0009712  |
| TcCLB.503889.5   | hypothetical protein                                          | 0,4737 | 0,07613    |
| TcCLB.511111.30  | hypothetical protein, conserved                               | 0,4736 | 0,0001823  |
| TcCLB.506303.100 | hypothetical protein, conserved                               | 0,4736 | 0,003155   |
| TcCLB.511077.30  | retrotransposon hot spot protein (RHS, pseudogene), putat     | 0,4735 | 0,09018    |
| TcCLB.506789.180 | glutaminy cyclase, putative                                   | 0,4734 | 0,00001345 |
| TcCLB.503595.19  | ATP-dependent DEAD/H RNA helicase, putative (fragment)        | 0,4734 | 0,00609    |
| TcCLB.511283.160 | hypothetical protein, conserved                               | 0,4733 | 2,129E-07  |
| TcCLB.506885.14  | ribosomal protein L37, putative                               | 0,4731 | 0,00006603 |
| TcCLB.511283.60  | hypothetical protein, conserved                               | 0,4731 | 0,0003157  |
| TcCLB.509213.150 | hypothetical protein, conserved                               | 0,473  | 0,001909   |
| TcCLB.508567.80  | DNA repair and recombination helicase protein PIF7, putat     | 0,4729 | 4,875E-06  |
| TcCLB.507959.270 | mucin TcMUCII, putative                                       | 0,4728 | 0,3577     |
| TcCLB.506845.10  | retrotransposon hot spot protein (RHS, pseudogene), putat     | 0,4727 | 0,09134    |
| TcCLB.504099.70  | retrotransposon hot spot protein (RHS, pseudogene), putat     | 0,4726 | 0,1965     |
| TcCLB.507679.20  | retrotransposon hot spot protein (RHS, pseudogene), putat     | 0,4724 | 0,2557     |
| TcCLB.506959.94  | hypothetical protein, conserved                               | 0,4723 | 0,004109   |
| TcCLB.503441.10  | retrotransposon hot spot protein (RHS, pseudogene), putat     | 0,472  | 0,0001249  |
| TcCLB.419469.30  | hypothetical protein, conserved                               | 0,472  | 0,001027   |
| TcCLB.508245.70  | mucin-associated surface protein (MASP), putative             | 0,472  | 0,2943     |
| TcCLB.510857.20  | hypothetical protein, conserved                               | 0,4719 | 0,02529    |
| TcCLB.506173.100 | mucin-associated surface protein (MASP, pseudogene), pu       | 0,4719 | 0,26       |
| TcCLB.507519.60  | Silent information regulator 2 related protein 1, putative (S | 0,4718 | 0,002046   |
| TcCLB.507949.219 | mucin-associated surface protein (MASP, pseudogene), pu       | 0,4718 | 0,02401    |
| TcCLB.511183.430 | trans-sialidase, Group V, putative                            | 0,4718 | 0,1902     |
| TcCLB.510361.50  | mucin-associated surface protein (MASP, pseudogene), pu       | 0,4717 | 0,1367     |
| TcCLB.508509.20  | mucin TcMUCII, putative                                       | 0,4717 | 0,3943     |
| TcCLB.506751.116 | elongation factor 1-gamma (EF-1-gamma, pseudogene), p         | 0,4716 | 0,3965     |
| TcCLB.509237.30  | glycosomal transporter (GAT1), putative (GAT1)                | 0,4712 | 0,00005107 |
| TcCLB.504213.80  | threonine synthase, putative                                  | 0,4711 | 0,00006149 |
| TcCLB.509427.60  | trans-sialidase (pseudogene), putative                        | 0,4711 | 0,1351     |
| TcCLB.509237.10  | mevalonate kinase, putative                                   | 0,4708 | 0,00001367 |
| TcCLB.510283.160 | hypothetical protein, conserved                               | 0,4708 | 0,006451   |

|                  |                                                           |        |            |
|------------------|-----------------------------------------------------------|--------|------------|
| TcCLB.510629.420 | protein phosphatase 1, regulatory subunit, putative       | 0,4706 | 0,0009003  |
| TcCLB.507471.20  | mucin-associated surface protein (MASP, pseudogene), pu   | 0,4706 | 0,1452     |
| TcCLB.506939.110 | mucin-associated surface protein (MASP), putative         | 0,4705 | 0,4111     |
| TcCLB.511575.20  | hypothetical protein, conserved                           | 0,4704 | 0,01394    |
| TcCLB.511231.69  | hypothetical protein, conserved                           | 0,47   | 0,0002018  |
| TcCLB.507089.270 | dihydrolipoyl dehydrogenase, putative (GCVL-2)            | 0,4699 | 3,014E-08  |
| TcCLB.511871.130 | retrotransposon hot spot (RHS) protein, putative          | 0,4699 | 0,006402   |
| TcCLB.511635.80  | hypothetical protein, conserved                           | 0,4696 | 0,002515   |
| TcCLB.509237.100 | hypothetical protein, conserved                           | 0,4696 | 0,005475   |
| TcCLB.508001.60  | trans-sialidase (pseudogene), putative                    | 0,4696 | 0,1639     |
| TcCLB.511533.19  | dynein light intermediate chain, putative                 | 0,4695 | 0,02846    |
| TcCLB.507547.80  | protein kinase, putative                                  | 0,4695 | 0,03119    |
| TcCLB.508669.30  | hypothetical protein                                      | 0,4693 | 0,0007348  |
| TcCLB.510569.10  | trans-sialidase, putative                                 | 0,4693 | 0,2067     |
| TcCLB.508831.66  | hypothetical protein, conserved                           | 0,4692 | 0,0001247  |
| TcCLB.506173.170 | retrotransposon hot spot protein (RHS, pseudogene), putat | 0,4692 | 0,002825   |
| TcCLB.503869.9   | axoneme central apparatus protein, putative               | 0,4691 | 0,001921   |
| TcCLB.509127.20  | hypothetical protein, conserved                           | 0,469  | 0,003656   |
| TcCLB.506895.30  | hypothetical protein, conserved                           | 0,469  | 0,01005    |
| TcCLB.511575.40  | hypothetical protein, conserved                           | 0,4688 | 4,044E-06  |
| TcCLB.509051.50  | hypothetical protein, conserved                           | 0,4687 | 0,0006299  |
| TcCLB.511401.95  | hypothetical protein (pseudogene)                         | 0,4687 | 0,08586    |
| TcCLB.508125.65  | elongation factor 1-gamma (EF-1-gamma, pseudogene), p     | 0,4686 | 0,2348     |
| TcCLB.508741.30  | hypothetical protein, conserved                           | 0,4685 | 0,0001351  |
| TcCLB.511247.18  | 50S ribosomal protein L16, putative                       | 0,4684 | 0,003556   |
| TcCLB.509265.60  | retrotransposon hot spot protein (RHS, pseudogene), putat | 0,4684 | 0,02222    |
| TcCLB.506757.70  | retrotransposon hot spot protein (RHS, pseudogene), putat | 0,4684 | 0,3054     |
| TcCLB.508999.230 | calpain-like cysteine peptidase (pseudogene), putative    | 0,4683 | 0,00003786 |
| TcCLB.510879.220 | hypothetical protein, conserved                           | 0,4682 | 0,0005118  |
| TcCLB.507641.50  | hypothetical protein, conserved                           | 0,4681 | 1,119E-06  |
| TcCLB.507837.30  | hypothetical protein, conserved                           | 0,4681 | 0,00005768 |
| TcCLB.508629.42  | retrotransposon hot spot protein (RHS, pseudogene), putat | 0,4681 | 0,0001038  |
| TcCLB.507691.10  | hypothetical protein, conserved                           | 0,4681 | 0,3107     |
| TcCLB.508975.20  | pre-rrna-processing protein tsr1 homolog                  | 0,4679 | 1,904E-06  |
| TcCLB.505401.40  | dispersed gene family protein 1 (DGF-1), putative         | 0,4678 | 0,5208     |
| TcCLB.503441.19  | retrotransposon hot spot protein (RHS, pseudogene), putat | 0,4675 | 0,0054     |
| TcCLB.510665.70  | acyl transferase-like protein, putative                   | 0,4674 | 0,09389    |
| TcCLB.507701.4   | mucin-associated surface protein (MASP), putative (fragm  | 0,4673 | 0,3569     |
| TcCLB.503605.10  | retrotransposon hot spot protein (RHS, pseudogene), putat | 0,4672 | 0,00001214 |
| TcCLB.511761.40  | hypothetical protein, conserved                           | 0,4672 | 0,1404     |
| TcCLB.506755.70  | hypothetical protein, conserved                           | 0,4671 | 0,0052     |
| TcCLB.504867.129 | hypothetical protein, conserved                           | 0,467  | 0,002036   |
| TcCLB.511727.290 | RNA-binding protein, putative                             | 0,4669 | 3,743E-13  |
| TcCLB.511903.230 | hypothetical protein, conserved                           | 0,4669 | 0,00347    |
| TcCLB.503947.20  | mucin-associated surface protein (MASP), putative         | 0,4669 | 0,07721    |

|                  |                                                           |        |            |
|------------------|-----------------------------------------------------------|--------|------------|
| TcCLB.503823.50  | hypothetical protein, conserved                           | 0,4668 | 0,0005073  |
| TcCLB.510857.54  | hypothetical protein, conserved                           | 0,4668 | 0,004961   |
| TcCLB.506757.100 | retrotransposon hot spot protein (RHS, pseudogene), putat | 0,4668 | 0,1138     |
| TcCLB.429185.20  | trans-sialidase (pseudogene), putative                    | 0,4668 | 0,3521     |
| TcCLB.506855.250 | hypothetical protein, conserved                           | 0,4666 | 0,00001167 |
| TcCLB.511019.80  | retrotransposon hot spot (RHS) protein, putative          | 0,4666 | 0,001636   |
| TcCLB.507857.50  | protein phosphatase, putative                             | 0,4664 | 0,0001353  |
| TcCLB.510309.30  | PTP1-interacting protein, 39 kDa, putative                | 0,4662 | 0,009057   |
| TcCLB.509769.148 | dynein heavy chain, putative                              | 0,4661 | 0,004707   |
| TcCLB.506563.110 | calpain-like cysteine peptidase (pseudogene), putative    | 0,4657 | 5,184E-07  |
| TcCLB.509723.20  | glycine dehydrogenase (pseudogene), putative              | 0,4657 | 0,2901     |
| TcCLB.510797.30  | hypothetical protein, conserved                           | 0,4654 | 0,0002091  |
| TcCLB.506285.90  | mucin TcMUCII, putative                                   | 0,4654 | 0,2921     |
| TcCLB.506909.150 | mucin TcMUCII (pseudogene), putative                      | 0,4654 | 0,5524     |
| TcCLB.506591.130 | hypothetical protein, conserved                           | 0,465  | 0,003034   |
| TcCLB.507959.170 | mucin-associated surface protein (MASP), putative         | 0,4649 | 0,232      |
| TcCLB.510889.270 | hypothetical protein, conserved                           | 0,4648 | 0,0002192  |
| TcCLB.504239.120 | trans-sialidase (pseudogene), putative                    | 0,4646 | 0,4507     |
| TcCLB.506767.50  | mucin TcMUCII, putative                                   | 0,4646 | 0,4599     |
| TcCLB.510101.110 | hypothetical protein, conserved                           | 0,4644 | 5,542E-06  |
| TcCLB.511127.180 | hypothetical protein, conserved                           | 0,4642 | 0,000217   |
| TcCLB.511001.90  | hypothetical protein, conserved                           | 0,4641 | 5,311E-09  |
| TcCLB.506577.60  | hypothetical protein, conserved                           | 0,4641 | 0,00003885 |
| TcCLB.509153.80  | Present in the outer mitochondrial membrane proteome 3i   | 0,464  | 0,008369   |
| TcCLB.511715.90  | hypothetical protein, conserved                           | 0,4637 | 0,0006457  |
| TcCLB.510671.20  | tryptophanyl-tRNA synthetase, putative                    | 0,4635 | 8,985E-09  |
| TcCLB.504159.70  | hypothetical protein, conserved                           | 0,4632 | 0,002284   |
| TcCLB.509825.7   | hypothetical protein, conserved                           | 0,4632 | 0,4486     |
| TcCLB.506401.370 | hypothetical protein, conserved                           | 0,4629 | 0,003136   |
| TcCLB.509695.30  | hypothetical protein, conserved                           | 0,4628 | 0,01379    |
| TcCLB.504277.11  | surface protein TolT, putative                            | 0,4626 | 0,072      |
| TcCLB.511237.70  | hypothetical protein, conserved                           | 0,4625 | 0,008198   |
| TcCLB.511219.20  | retrotransposon hot spot protein (RHS, pseudogene), putat | 0,4625 | 0,009842   |
| TcCLB.511871.80  | frataxin-like, mitochondrial precursor, putative          | 0,4622 | 0,0236     |
| TcCLB.508761.90  | mucin-associated surface protein (MASP), putative         | 0,4619 | 0,632      |
| TcCLB.511291.50  | hypothetical protein, conserved                           | 0,4617 | 0,007485   |
| TcCLB.508977.130 | mucin-associated surface protein (MASP), putative         | 0,4617 | 0,2051     |
| TcCLB.510515.100 | coronin, putative (CRN12)                                 | 0,4616 | 0,00001853 |
| TcCLB.511277.486 | hypothetical protein, conserved                           | 0,4616 | 0,01202    |
| TcCLB.504183.10  | retrotransposon hot spot protein (RHS, pseudogene), putat | 0,4614 | 0,07816    |
| TcCLB.511237.50  | 40S ribosomal protein S33, putative                       | 0,4612 | 2,203E-06  |
| TcCLB.508277.320 | hypothetical protein, conserved                           | 0,4609 | 0,001031   |
| TcCLB.511607.110 | mucin-associated surface protein (MASP), putative         | 0,4608 | 0,1846     |
| TcCLB.508629.58  | hypothetical protein, conserved (pseudogene)              | 0,4607 | 0,0004695  |
| TcCLB.507445.50  | myosin heavy chain, putative                              | 0,4606 | 1,549E-06  |



|                   |                                                            |        |            |
|-------------------|------------------------------------------------------------|--------|------------|
| TcCLB.511409.40   | hypothetical protein, conserved                            | 0,4606 | 0,0005956  |
| TcCLB.511727.145  | hypothetical protein                                       | 0,4605 | 6,913E-06  |
| TcCLB.507941.50   | hypothetical protein, conserved                            | 0,4603 | 0,0002018  |
| TcCLB.507993.36   | hypothetical protein, conserved                            | 0,4603 | 0,02308    |
| TcCLB.510729.140  | NIMA-related kinase, putative                              | 0,4603 | 0,06359    |
| TcCLB.508153.1130 | hypothetical protein                                       | 0,4603 | 0,07579    |
| TcCLB.505919.40   | protein kinase, putative                                   | 0,4602 | 0,1908     |
| TcCLB.510759.150  | hypothetical protein, conserved                            | 0,46   | 0,00002994 |
| TcCLB.511283.290  | hypothetical protein, conserved                            | 0,4599 | 5,117E-08  |
| TcCLB.511149.80   | hypothetical protein                                       | 0,4599 | 0,3342     |
| TcCLB.507985.30   | trans-sialidase (pseudogene), putative                     | 0,4598 | 0,6802     |
| TcCLB.510657.20   | ubiquitin hydrolase, putative                              | 0,4597 | 0,01514    |
| TcCLB.509539.20   | receptor-type adenylate cyclase, putative                  | 0,4596 | 0,00404    |
| TcCLB.511771.143  | retrotransposon hot spot protein (RHS, pseudogene), putat  | 0,4595 | 0,2426     |
| TcCLB.510425.19   | 40S ribosomal protein SA, putative                         | 0,4591 | 6,702E-08  |
| TcCLB.418185.70   | trans-sialidase, Group II, putative                        | 0,459  | 0,1629     |
| TcCLB.507783.20   | AGP2beta-2, putative                                       | 0,4589 | 0,0001009  |
| TcCLB.506147.200  | hypothetical protein, conserved                            | 0,4588 | 0,0009239  |
| TcCLB.506517.14   | protein kinase, putative                                   | 0,4588 | 0,1424     |
| TcCLB.510173.100  | hypothetical protein, conserved                            | 0,4587 | 0,0109     |
| TcCLB.511771.120  | hypothetical protein, conserved (pseudogene)               | 0,4586 | 0,01247    |
| TcCLB.504161.59   | transporter, putative                                      | 0,4585 | 0,01012    |
| TcCLB.510879.60   | hypothetical protein, conserved                            | 0,4585 | 0,01111    |
| TcCLB.507057.4    | myosin heavy chain, putative (fragment)                    | 0,4585 | 0,01329    |
| TcCLB.506573.10   | hypothetical protein, conserved                            | 0,4584 | 0,0003108  |
| TcCLB.510889.30   | kinase, putative                                           | 0,4584 | 0,00157    |
| TcCLB.506145.50   | hypothetical protein, conserved                            | 0,4584 | 0,1047     |
| TcCLB.507021.20   | ESAG8-associated protein, putative (PIE8)                  | 0,4583 | 0,2302     |
| TcCLB.509525.244  | hypothetical protein                                       | 0,4583 | 0,536      |
| TcCLB.506693.50   | ribonuclease inhibitor-like protein, putative              | 0,4582 | 0,002015   |
| TcCLB.506563.60   | hypothetical protein, conserved                            | 0,4581 | 0,009866   |
| TcCLB.503891.50   | hypothetical protein, conserved                            | 0,458  | 0,0009435  |
| TcCLB.507501.30   | hypothetical protein, conserved                            | 0,4579 | 0,188      |
| TcCLB.506367.180  | vesicular transport protein (CDC48 homologue), putative    | 0,4578 | 0,0001577  |
| TcCLB.511755.28   | hypothetical protein, conserved                            | 0,4578 | 0,08822    |
| TcCLB.506845.60   | retrotransposon hot spot (RHS) protein, putative           | 0,4578 | 0,2453     |
| TcCLB.510423.70   | hypothetical protein, conserved                            | 0,4576 | 0,02832    |
| TcCLB.509209.20   | hypothetical protein, conserved                            | 0,4576 | 0,06917    |
| TcCLB.506195.25   | hypothetical protein, conserved                            | 0,4575 | 0,2178     |
| TcCLB.509745.10   | hypothetical protein, conserved                            | 0,4574 | 0,00003905 |
| TcCLB.510489.44   | mucin TcMUCII (pseudogene), putative                       | 0,4574 | 0,361      |
| TcCLB.511301.80   | choline/carnitine O-acyltransferase (pseudogene), putative | 0,4572 | 0,00001253 |
| TcCLB.510181.150  | caltractin, putative                                       | 0,4571 | 0,02437    |
| TcCLB.508011.110  | mucin-associated surface protein (MASP), putative          | 0,4571 | 0,225      |
| TcCLB.503537.9    | retrotransposon hot spot protein (RHS, pseudogene), putat  | 0,457  | 0,0001672  |

|                  |                                                             |        |            |
|------------------|-------------------------------------------------------------|--------|------------|
| TcCLB.506459.299 | mucin-associated surface protein (MASP, pseudogene), pu     | 0,4569 | 0,00003554 |
| TcCLB.507499.60  | retrotransposon hot spot protein (RHS, pseudogene), putat   | 0,4568 | 1,224E-07  |
| TcCLB.511025.110 | dihydrolipoyl dehydrogenase, putative (GCVL-2)              | 0,4568 | 6,228E-06  |
| TcCLB.510543.10  | retrotransposon hot spot protein (RHS, pseudogene), putat   | 0,4567 | 0,01298    |
| TcCLB.506683.250 | retrotransposon hot spot protein (RHS, pseudogene), putat   | 0,4567 | 0,1219     |
| TcCLB.511553.200 | mucin-associated surface protein (MASP), putative           | 0,4567 | 0,3224     |
| TcCLB.506651.9   | dispersed gene family protein 1 (DGF-1), putative           | 0,4566 | 0,1199     |
| TcCLB.510379.20  | hypothetical protein (fragment)                             | 0,4566 | 0,3596     |
| TcCLB.509429.124 | hypothetical protein, conserved                             | 0,4565 | 0,07144    |
| TcCLB.510017.59  | mucin-associated surface protein (MASP), putative           | 0,4564 | 0,06549    |
| TcCLB.506975.90  | trans-sialidase, Group VIII, putative                       | 0,4564 | 0,2077     |
| TcCLB.504147.210 | hypothetical protein, conserved                             | 0,4563 | 0,009672   |
| TcCLB.511469.110 | dispersed gene family protein 1 (DGF-1), putative           | 0,4559 | 0,06774    |
| TcCLB.511877.20  | mucin-associated surface protein (MASP), putative           | 0,4559 | 0,07761    |
| TcCLB.509699.210 | mucin-associated surface protein (MASP), putative           | 0,4558 | 0,3055     |
| TcCLB.511649.140 | hypothetical protein, conserved                             | 0,4555 | 0,005207   |
| TcCLB.503479.10  | hypothetical protein, conserved                             | 0,4553 | 0,001749   |
| TcCLB.510667.20  | hypothetical protein, conserved                             | 0,4552 | 0,01415    |
| TcCLB.508817.50  | DNA repair protein RAD51, putative (RAD51)                  | 0,4551 | 2,627E-07  |
| TcCLB.507583.60  | hypothetical protein, conserved                             | 0,4551 | 0,4351     |
| TcCLB.509109.80  | hypothetical protein, conserved                             | 0,4548 | 5,187E-09  |
| TcCLB.509105.20  | palmitoyl acyltransferase 2, putative                       | 0,4548 | 0,001332   |
| TcCLB.511821.120 | hypothetical protein, conserved                             | 0,4547 | 0,0009392  |
| TcCLB.510165.60  | expression site-associated gene (ESAG-like) protein, putati | 0,4547 | 0,1367     |
| TcCLB.508973.80  | hypothetical protein, conserved                             | 0,4546 | 8,878E-09  |
| TcCLB.510583.74  | mucin-associated surface protein (MASP, pseudogene), pu     | 0,4543 | 0,3049     |
| TcCLB.506591.120 | receptor-type adenylate cyclase (pseudogene), putative      | 0,4542 | 0,00008981 |
| TcCLB.506201.84  | hypothetical protein, conserved                             | 0,4541 | 0,02821    |
| TcCLB.506757.90  | trans-sialidase, Group II, putative                         | 0,4537 | 0,108      |
| TcCLB.507231.20  | trans-sialidase (pseudogene), putative                      | 0,4535 | 0,1818     |
| TcCLB.511607.100 | mucin TcMUCII, putative                                     | 0,4534 | 0,1792     |
| TcCLB.506765.40  | trans-sialidase, Group II, putative                         | 0,4533 | 0,3421     |
| TcCLB.511367.50  | hypothetical protein, conserved                             | 0,4532 | 0,00005029 |
| TcCLB.509571.50  | hypothetical protein, conserved                             | 0,4531 | 0,00006438 |
| TcCLB.509857.10  | hypothetical protein, conserved                             | 0,453  | 0,0009573  |
| TcCLB.506725.40  | hypothetical protein, conserved                             | 0,453  | 0,001537   |
| TcCLB.508381.40  | retrotransposon hot spot protein (RHS, pseudogene), putat   | 0,4526 | 0,09589    |
| TcCLB.509979.200 | mucin-associated surface protein (MASP), putative           | 0,4524 | 0,1453     |
| TcCLB.508523.40  | dispersed gene family protein 1 (DGF-1), putative           | 0,4522 | 0,0007565  |
| TcCLB.511621.30  | hypothetical protein, conserved                             | 0,4522 | 0,01042    |
| TcCLB.509331.9   | 5'-3' exoribonuclease C, putative (fragment) (XRNC)         | 0,4521 | 0,06971    |
| TcCLB.504863.10  | retrotransposon hot spot (RHS) protein, putative            | 0,4519 | 0,00006645 |
| TcCLB.504003.90  | hypothetical protein, conserved                             | 0,4516 | 0,003431   |
| TcCLB.511507.24  | hypothetical protein, conserved                             | 0,4514 | 0,04597    |
| TcCLB.507623.60  | hypothetical protein, conserved                             | 0,4513 | 5,862E-06  |

|                  |                                                            |        |            |
|------------------|------------------------------------------------------------|--------|------------|
| TcCLB.508887.30  | hypothetical protein                                       | 0,4513 | 0,2646     |
| TcCLB.508639.10  | trans-sialidase, putative                                  | 0,4511 | 0,1185     |
| TcCLB.507429.6   | hypothetical protein                                       | 0,4511 | 0,5211     |
| TcCLB.511183.200 | mucin-associated surface protein (MASP, pseudogene), pu    | 0,4509 | 0,07039    |
| TcCLB.509897.210 | mucin-associated surface protein (MASP, pseudogene), pu    | 0,4508 | 0,02847    |
| TcCLB.506419.69  | hypothetical protein, conserved                            | 0,4507 | 0,03494    |
| TcCLB.508209.100 | 10 kDa heat shock protein, putative                        | 0,4506 | 0,006287   |
| TcCLB.506683.19  | GMP synthase (pseudogene), putative                        | 0,4505 | 0,0005911  |
| TcCLB.509525.20  | trans-sialidase (pseudogene), putative                     | 0,4505 | 0,02967    |
| TcCLB.506173.70  | trans-sialidase, Group V, putative                         | 0,4504 | 0,09783    |
| TcCLB.509207.130 | peptidyl-prolyl cis-trans isomerase (PAR45)                | 0,4503 | 0,0001423  |
| TcCLB.508731.30  | calmodulin, putative                                       | 0,4503 | 0,003173   |
| TcCLB.511449.40  | mucin TcMUCII (pseudogene), putative                       | 0,4503 | 0,3186     |
| TcCLB.509291.10  | hypothetical protein                                       | 0,4503 | 0,3686     |
| TcCLB.410243.10  | hypothetical protein, conserved (fragment)                 | 0,4502 | 0,04395    |
| TcCLB.509749.39  | short-chain dehydrogenase, putative                        | 0,4502 | 0,3442     |
| TcCLB.509099.10  | GTP-binding protein, putative                              | 0,45   | 0,0004522  |
| TcCLB.508285.60  | trans-sialidase, Group II, putative                        | 0,45   | 0,1087     |
| TcCLB.506559.360 | hypothetical protein, conserved                            | 0,4497 | 0,00007371 |
| TcCLB.506537.60  | dispersed gene family protein 1 (DGF-1, pseudogene), puta  | 0,4496 | 0,003376   |
| TcCLB.508175.370 | glutamine synthetase, putative                             | 0,4496 | 0,003463   |
| TcCLB.508873.10  | mucin-associated surface protein (MASP), putative          | 0,4496 | 0,1036     |
| TcCLB.505915.40  | beta galactofuranosyl glycosyltransferase (pseudogene), pi | 0,4495 | 0,1647     |
| TcCLB.510493.20  | hypothetical protein, conserved                            | 0,4491 | 0,0467     |
| TcCLB.504207.20  | hypothetical protein, conserved                            | 0,4488 | 2,716E-06  |
| TcCLB.507939.70  | hypothetical protein                                       | 0,4487 | 0,2537     |
| TcCLB.510347.10  | hypothetical protein                                       | 0,4486 | 0,00002988 |
| TcCLB.509899.20  | retrotransposon hot spot protein (RHS, pseudogene), putat  | 0,4486 | 0,01765    |
| TcCLB.504313.10  | trans-sialidase, Group IV, putative                        | 0,4486 | 0,3543     |
| TcCLB.508325.220 | beta galactofuranosyl glycosyltransferase (pseudogene), pi | 0,4485 | 0,001522   |
| TcCLB.510483.120 | mucin-associated surface protein (MASP), putative          | 0,4482 | 0,4954     |
| TcCLB.506531.60  | hypothetical protein, conserved                            | 0,448  | 0,0001775  |
| TcCLB.507933.29  | hypothetical protein, conserved (fragment)                 | 0,4476 | 0,1143     |
| TcCLB.503633.40  | trans-sialidase (pseudogene), putative                     | 0,4476 | 0,141      |
| TcCLB.511815.60  | prefoldin, putative                                        | 0,4475 | 0,0001438  |
| TcCLB.510101.280 | kinesin, putative                                          | 0,4474 | 7,842E-09  |
| TcCLB.511557.64  | hypothetical protein                                       | 0,4474 | 0,006364   |
| TcCLB.507159.50  | hypothetical protein, conserved                            | 0,4467 | 0,0005743  |
| TcCLB.509059.10  | hypothetical protein                                       | 0,4465 | 0,05659    |
| TcCLB.511183.550 | mucin TcMUCII, putative                                    | 0,4463 | 0,5578     |
| TcCLB.510463.120 | mucin-associated surface protein (MASP), putative          | 0,4463 | 0,7709     |
| TcCLB.510579.10  | tyrosine phosphatase-like protein, putative                | 0,4462 | 0,002924   |
| TcCLB.509511.10  | dispersed gene family protein 1 (DGF-1), putative          | 0,446  | 0,0289     |
| TcCLB.507765.60  | 40S ribosomal protein S21, putative                        | 0,4457 | 8,157E-10  |
| TcCLB.432443.10  | mucin-associated surface protein (MASP), putative          | 0,4456 | 0,3673     |

|                  |                                                           |        |            |
|------------------|-----------------------------------------------------------|--------|------------|
| TcCLB.511621.130 | hypothetical protein, conserved                           | 0,4453 | 0,000155   |
| TcCLB.506443.70  | glutathione-S-transferase/glutaredoxin, putative          | 0,4453 | 0,001976   |
| TcCLB.509937.150 | serine hydroxymethyltransferase, putative                 | 0,4452 | 0,01802    |
| TcCLB.511903.45  | tuzin-like (pseudogene), putative                         | 0,4451 | 0,003167   |
| TcCLB.509437.183 | hypothetical protein, conserved (pseudogene)              | 0,4451 | 0,004175   |
| TcCLB.503563.14  | ADG1, putative                                            | 0,4451 | 0,008142   |
| TcCLB.506871.120 | hypothetical protein, conserved                           | 0,445  | 0,0003854  |
| TcCLB.404843.10  | hypothetical protein, conserved                           | 0,4449 | 0,004454   |
| TcCLB.508121.160 | mucin-associated surface protein (MASP, pseudogene), pu   | 0,4449 | 0,3971     |
| TcCLB.506435.110 | hypothetical protein, conserved                           | 0,4445 | 0,02649    |
| TcCLB.507953.70  | 90 kDa surface protein, putative                          | 0,4445 | 0,395      |
| TcCLB.510759.170 | hypothetical protein, conserved                           | 0,4443 | 0,00006097 |
| TcCLB.511907.120 | mucin-like glycoprotein, putative                         | 0,4443 | 0,1562     |
| TcCLB.510687.120 | snoRNP protein GAR1, putative                             | 0,4439 | 0,004129   |
| TcCLB.508919.94  | hypothetical protein, conserved                           | 0,4438 | 0,01573    |
| TcCLB.507957.280 | mucin-associated surface protein (MASP), putative         | 0,4438 | 0,2782     |
| TcCLB.509247.50  | methionyl-tRNA synthetase, putative                       | 0,4437 | 4,726E-08  |
| TcCLB.507087.60  | hypothetical protein, conserved                           | 0,4437 | 0,003309   |
| TcCLB.508173.90  | hypothetical protein, conserved                           | 0,4436 | 0,03267    |
| TcCLB.511797.120 | mucin-associated surface protein (MASP), putative         | 0,4432 | 0,2791     |
| TcCLB.506833.50  | hypothetical protein, conserved                           | 0,4431 | 0,00005069 |
| TcCLB.510699.40  | mucin TcMUCII, putative                                   | 0,4431 | 0,3851     |
| TcCLB.506895.5   | hypothetical protein                                      | 0,4429 | 0,5052     |
| TcCLB.507053.40  | hypothetical protein, conserved                           | 0,4425 | 6,884E-07  |
| TcCLB.509529.19  | dispersed gene family protein 1 (DGF-1), putative (fragme | 0,4425 | 0,01542    |
| TcCLB.508289.70  | mucin-associated surface protein (MASP, pseudogene), pu   | 0,4424 | 0,4523     |
| TcCLB.506139.10  | mucin-associated surface protein (MASP), putative         | 0,4424 | 0,4557     |
| TcCLB.506175.50  | hypothetical protein, conserved                           | 0,4423 | 0,0001669  |
| TcCLB.506857.10  | glycogen synthase kinase-3 alpha, putative                | 0,4422 | 0,002503   |
| TcCLB.508045.79  | spliceosomal U5 snRNP-specific protein, putative          | 0,4421 | 0,001919   |
| TcCLB.504157.130 | surface protein TolT, putative (TolT)                     | 0,442  | 0,06304    |
| TcCLB.509717.140 | hypothetical protein, conserved (pseudogene)              | 0,442  | 0,1519     |
| TcCLB.398915.5   | trans-sialidase, putative (fragment)                      | 0,4419 | 0,000452   |
| TcCLB.508585.10  | hypothetical protein, conserved                           | 0,4419 | 0,008538   |
| TcCLB.504125.90  | protein kinase, putative                                  | 0,4417 | 0,00003786 |
| TcCLB.508061.60  | retrotransposon hot spot protein (RHS, pseudogene), putat | 0,4417 | 0,003407   |
| TcCLB.509907.60  | trans-sialidase (pseudogene), putative                    | 0,4416 | 0,1949     |
| TcCLB.506605.40  | hypothetical protein, conserved                           | 0,4411 | 0,002175   |
| TcCLB.506139.130 | hypothetical protein                                      | 0,4411 | 0,5307     |
| TcCLB.511815.4   | proteasome regulatory ATPase subunit 5, putative (fragme  | 0,441  | 0,001576   |
| TcCLB.508277.269 | hypothetical protein, conserved (pseudogene)              | 0,441  | 0,005766   |
| TcCLB.506401.180 | hypothetical protein, conserved                           | 0,4407 | 8,65E-07   |
| TcCLB.510737.30  | mitochondrial carrier protein, putative                   | 0,4406 | 0,004625   |
| TcCLB.511399.24  | trans-sialidase, putative                                 | 0,4406 | 0,2003     |
| TcCLB.506147.150 | hypothetical protein, conserved                           | 0,4403 | 0,0003198  |

|                  |                                                            |        |            |
|------------------|------------------------------------------------------------|--------|------------|
| TcCLB.510041.10  | sec1 family transport protein, putative                    | 0,4403 | 0,07078    |
| TcCLB.511523.14  | succinate dehydrogenase cytochrome B subunit               | 0,4402 | 0,00487    |
| TcCLB.511583.10  | hypothetical protein, conserved                            | 0,44   | 0,006998   |
| TcCLB.511609.30  | mucin-associated surface protein (MASP), putative          | 0,44   | 0,5765     |
| TcCLB.509233.50  | hypothetical protein, conserved                            | 0,4399 | 9,94E-07   |
| TcCLB.509337.10  | hypothetical protein, conserved                            | 0,4399 | 0,0001895  |
| TcCLB.508897.70  | ADP-ribosylation factor family, putative                   | 0,4399 | 0,01244    |
| TcCLB.509561.20  | flagellum-adhesion glycoprotein, putative                  | 0,4397 | 0,00007367 |
| TcCLB.507047.50  | hypothetical protein, conserved                            | 0,4397 | 0,00169    |
| TcCLB.508577.110 | hypothetical protein, conserved                            | 0,4397 | 0,01418    |
| TcCLB.509753.210 | mucin-associated surface protein (MASP), putative          | 0,4397 | 0,1818     |
| TcCLB.510773.100 | Flagellar Member 4 (FLAM4)                                 | 0,4395 | 0,0002282  |
| TcCLB.509455.114 | Protein of unknown function (DUF1295), putative (POMP23)   | 0,4395 | 0,0009987  |
| TcCLB.511851.37  | mucin TcMUCl, putative                                     | 0,4395 | 0,2401     |
| TcCLB.509151.110 | hypothetical protein, conserved                            | 0,4392 | 0,00001715 |
| TcCLB.508365.10  | mucin TcMUCII, putative                                    | 0,4391 | 0,4606     |
| TcCLB.506605.130 | hypothetical protein, conserved                            | 0,439  | 0,008226   |
| TcCLB.510515.90  | hypothetical protein, conserved                            | 0,4389 | 0,01582    |
| TcCLB.508525.5   | cAMP response protein 1, putative (pseudogene)             | 0,4387 | 0,1646     |
| TcCLB.511245.140 | fatty acid elongase, putative                              | 0,4386 | 0,00003475 |
| TcCLB.503783.50  | surface protease GP63 (pseudogene), putative               | 0,4386 | 0,3444     |
| TcCLB.507159.80  | hypothetical protein, conserved                            | 0,4385 | 0,0000378  |
| TcCLB.506727.10  | hypothetical protein                                       | 0,4382 | 0,0007514  |
| TcCLB.508441.110 | mucin TcMUCl, putative                                     | 0,4382 | 0,009775   |
| TcCLB.511807.70  | heat shock protein DNAJ, putative                          | 0,4381 | 0,000147   |
| TcCLB.509831.5   | vesicular transport protein (CDC48 homologue), putative (f | 0,4381 | 0,0253     |
| TcCLB.508231.180 | hypothetical protein, conserved                            | 0,438  | 0,0006113  |
| TcCLB.506269.59  | hypothetical protein (pseudogene)                          | 0,4379 | 0,1225     |
| TcCLB.509785.120 | hypothetical protein, conserved (pseudogene)               | 0,4374 | 0,387      |
| TcCLB.508555.10  | hypothetical protein, conserved                            | 0,4372 | 0,05277    |
| TcCLB.511801.44  | DNA-dependent RNA polymerases, putative                    | 0,4368 | 0,01128    |
| TcCLB.511635.69  | hypothetical protein, conserved                            | 0,4368 | 0,1058     |
| TcCLB.505949.50  | mucin-associated surface protein (MASP, pseudogene), pu    | 0,4366 | 0,5494     |
| TcCLB.510113.20  | dispersed gene family protein 1 (DGF-1, pseudogene), puta  | 0,4365 | 0,02124    |
| TcCLB.510729.210 | hypothetical protein, conserved                            | 0,4364 | 0,00000985 |
| TcCLB.509885.20  | hypothetical protein, conserved                            | 0,4364 | 0,02194    |
| TcCLB.509399.180 | hypothetical protein, conserved                            | 0,4363 | 0,08413    |
| TcCLB.508831.120 | glucosamine 6-phosphate n-acetyltransferase, putative      | 0,4362 | 0,02538    |
| TcCLB.506955.170 | trans-sialidase (pseudogene), putative                     | 0,4361 | 0,1131     |
| TcCLB.504151.20  | hypothetical protein, conserved                            | 0,4358 | 0,01364    |
| TcCLB.511899.10  | 2-amino-3-ketobutyrate coenzyme A ligase, putative         | 0,4358 | 0,07469    |
| TcCLB.511255.540 | mucin-associated surface protein (MASP), putative          | 0,4357 | 0,4312     |
| TcCLB.508173.264 | hypothetical protein, conserved                            | 0,4353 | 2,714E-06  |
| TcCLB.506581.20  | hypothetical protein, conserved                            | 0,4353 | 0,00898    |
| TcCLB.504131.100 | DnaJ chaperone protein, putative                           | 0,4352 | 3,006E-06  |

|                  |                                                               |        |            |
|------------------|---------------------------------------------------------------|--------|------------|
| TcCLB.507491.59  | ubiquitin fold modifier protein, putative (UFM1)              | 0,4352 | 0,05694    |
| TcCLB.509023.90  | hypothetical protein, conserved                               | 0,4351 | 0,02456    |
| TcCLB.507211.10  | choline/carnitine O-acyltransferase, putative                 | 0,4348 | 0,0003146  |
| TcCLB.510243.50  | adenylate kinase, putative                                    | 0,4348 | 0,00145    |
| TcCLB.506629.70  | cysteine desulfurase, putative                                | 0,4348 | 0,002888   |
| TcCLB.506529.250 | hypothetical protein, conserved                               | 0,4347 | 4,757E-07  |
| TcCLB.510081.30  | retrotransposon hot spot protein (RHS, pseudogene), putative  | 0,4347 | 0,002459   |
| TcCLB.508355.210 | hypothetical protein, conserved                               | 0,4346 | 0,01436    |
| TcCLB.508013.70  | mucin TcMUCII, putative                                       | 0,4346 | 0,5765     |
| TcCLB.508719.70  | flagellum targeting protein kharon1, putative (KH1)           | 0,4343 | 0,00002486 |
| TcCLB.509067.40  | NADH dehydrogenase subunit NI8M, putative                     | 0,4343 | 0,005178   |
| TcCLB.510741.70  | protein kinase, putative                                      | 0,4342 | 0,06817    |
| TcCLB.511277.115 | hypothetical protein, conserved                               | 0,434  | 0,00001704 |
| TcCLB.509207.160 | proteasome regulatory ATPase subunit 1, putative              | 0,4337 | 4,788E-06  |
| TcCLB.506173.120 | mucin TcMUCI, putative                                        | 0,4336 | 0,419      |
| TcCLB.508273.30  | hypothetical protein, conserved                               | 0,4335 | 0,0007576  |
| TcCLB.507521.100 | hypothetical protein, conserved                               | 0,4334 | 0,02515    |
| TcCLB.504371.20  | dispersed gene family protein 1 (DGF-1, pseudogene), putative | 0,4333 | 0,05801    |
| TcCLB.509391.10  | Flagellar calcium-binding protein 24, putative                | 0,4333 | 0,5201     |
| TcCLB.506811.190 | UDP-galactose 4-epimerase (GalE)                              | 0,4331 | 0,00001279 |
| TcCLB.508317.10  | cysteine proteinase, putative                                 | 0,433  | 0,0007722  |
| TcCLB.509319.109 | paraflagellar rod protein, putative (fragment)                | 0,433  | 0,09613    |
| TcCLB.510733.50  | hypothetical protein, conserved                               | 0,4329 | 6,899E-08  |
| TcCLB.510187.410 | hypothetical protein, conserved                               | 0,4329 | 0,001219   |
| TcCLB.505999.160 | leucine-rich repeat-containing protein                        | 0,4329 | 0,006994   |
| TcCLB.506961.10  | retrotransposon hot spot (RHS) protein, putative              | 0,4327 | 0,003908   |
| TcCLB.510237.80  | trans-sialidase, Group V, putative                            | 0,4327 | 0,1364     |
| TcCLB.506603.35  | trans-sialidase (pseudogene), putative                        | 0,4327 | 0,1408     |
| TcCLB.504717.10  | divalent cation tolerance protein, putative                   | 0,4325 | 0,4826     |
| TcCLB.506525.50  | hypothetical protein, conserved                               | 0,4324 | 0,002557   |
| TcCLB.510155.210 | calcium/potassium channel (CAKC), putative                    | 0,432  | 0,0005057  |
| TcCLB.507009.130 | hypothetical protein, conserved                               | 0,4319 | 0,0001172  |
| TcCLB.511167.30  | hypothetical protein, conserved                               | 0,4318 | 0,002853   |
| TcCLB.503521.89  | mannosyltransferase-II, putative                              | 0,4317 | 0,00115    |
| TcCLB.508979.40  | hypothetical protein                                          | 0,4316 | 0,568      |
| TcCLB.511735.30  | hypothetical protein, conserved                               | 0,4315 | 0,03277    |
| TcCLB.507017.159 | hypothetical protein, conserved                               | 0,4311 | 0,02778    |
| TcCLB.508775.20  | retrotransposon hot spot protein (RHS, pseudogene), putative  | 0,4311 | 0,04767    |
| TcCLB.507521.60  | hypothetical protein, conserved                               | 0,4311 | 0,06472    |
| TcCLB.509843.10  | retrotransposon hot spot (RHS) protein, putative              | 0,431  | 0,0004121  |
| TcCLB.504111.10  | hypothetical protein, conserved                               | 0,4307 | 0,0001104  |
| TcCLB.504213.40  | hypothetical protein, conserved                               | 0,4305 | 0,0009772  |
| TcCLB.508239.30  | neurobeachin/beige-like protein, putative                     | 0,4302 | 7,099E-09  |
| TcCLB.509879.20  | hypothetical protein, conserved                               | 0,4302 | 0,005972   |
| TcCLB.510719.270 | hypothetical protein, conserved                               | 0,4302 | 0,0387     |

|                  |                                                                |        |            |
|------------------|----------------------------------------------------------------|--------|------------|
| TcCLB.508939.40  | hypothetical protein                                           | 0,4302 | 0,4489     |
| TcCLB.510719.35  | ribosomal protein L29, putative                                | 0,4301 | 0,007242   |
| TcCLB.511209.30  | hypothetical protein, conserved (pseudogene)                   | 0,43   | 0,0001088  |
| TcCLB.506345.30  | retrotransposon hot spot protein (RHS, pseudogene), putative   | 0,43   | 0,0001255  |
| TcCLB.504505.10  | retrotransposon hot spot protein (RHS, pseudogene), putative   | 0,4298 | 0,001932   |
| TcCLB.511151.30  | hypothetical protein, conserved                                | 0,4297 | 0,04284    |
| TcCLB.511003.190 | hypothetical protein, conserved                                | 0,4296 | 0,01105    |
| TcCLB.505097.20  | hypothetical protein, conserved (pseudogene)                   | 0,4296 | 0,04109    |
| TcCLB.509265.120 | trans-sialidase, putative                                      | 0,4296 | 0,3301     |
| TcCLB.508087.20  | retrotransposon hot spot protein (RHS, pseudogene), putative   | 0,4295 | 0,0001541  |
| TcCLB.508507.24  | hypothetical protein, conserved                                | 0,4295 | 0,007581   |
| TcCLB.509791.189 | flagellum targeting protein kharon1, putative (fragment) (l    | 0,429  | 0,000858   |
| TcCLB.504153.250 | Present in the outer mitochondrial membrane proteome 1:        | 0,429  | 0,006804   |
| TcCLB.508823.140 | ribosomal protein S20, putative                                | 0,4287 | 6,742E-06  |
| TcCLB.409625.10  | trans-sialidase, putative (fragment)                           | 0,4287 | 0,3263     |
| TcCLB.506927.30  | hypothetical protein, conserved (fragment)                     | 0,4283 | 0,0144     |
| TcCLB.509993.20  | mucin TcMUCI, putative                                         | 0,4283 | 0,2433     |
| TcCLB.466823.10  | Checkpoint protein HUS1, putative                              | 0,4281 | 0,05497    |
| TcCLB.509081.20  | mucin-associated surface protein (MASP), putative              | 0,4281 | 0,1687     |
| TcCLB.506717.60  | retrotransposon hot spot protein (RHS, pseudogene), putative   | 0,428  | 0,0009531  |
| TcCLB.509715.60  | hypothetical protein, conserved                                | 0,428  | 0,02091    |
| TcCLB.506435.250 | hypothetical protein, conserved                                | 0,428  | 0,03488    |
| TcCLB.511585.280 | retrotransposon hot spot protein (RHS, pseudogene), putative   | 0,4278 | 0,001392   |
| TcCLB.506611.20  | mucin TcMUCII, putative                                        | 0,4278 | 0,5782     |
| TcCLB.508759.40  | mucin-associated surface protein (MASP), putative              | 0,4277 | 0,2143     |
| TcCLB.511811.30  | hypothetical protein, conserved                                | 0,4272 | 0,000934   |
| TcCLB.507831.10  | hypothetical protein                                           | 0,4272 | 0,1451     |
| TcCLB.510101.440 | hypothetical protein, conserved                                | 0,427  | 0,007051   |
| TcCLB.504147.180 | hypothetical protein, conserved                                | 0,427  | 0,02276    |
| TcCLB.509205.110 | elongation factor G2-like protein, putative                    | 0,4269 | 0,3814     |
| TcCLB.503797.20  | centrin (pseudogene), putative                                 | 0,4268 | 0,05245    |
| TcCLB.511875.110 | trans-sialidase (pseudogene), putative                         | 0,4268 | 0,06374    |
| TcCLB.511173.100 | mucin-associated surface protein (MASP), putative              | 0,4268 | 0,2252     |
| TcCLB.508233.60  | heat shock protein 100 (clp protein), putative                 | 0,4267 | 0,1335     |
| TcCLB.509167.60  | hypothetical protein, conserved                                | 0,4266 | 0,00001931 |
| TcCLB.508355.140 | hypothetical protein, conserved                                | 0,4266 | 0,000629   |
| TcCLB.507573.6   | ATP-dependent DEAD/H RNA helicase (pseudogene), putative       | 0,4266 | 0,1546     |
| TcCLB.506775.90  | PIF1 helicase-like protein, putative                           | 0,4262 | 4,111E-06  |
| TcCLB.507491.10  | hypothetical protein, conserved                                | 0,4262 | 0,002934   |
| TcCLB.507765.120 | hypothetical protein, conserved                                | 0,4261 | 0,00001371 |
| TcCLB.511421.150 | leucine-rich repeat-containing protein                         | 0,426  | 0,00005787 |
| TcCLB.506487.60  | endosomal integral membrane protein, putative (fragment)       | 0,4259 | 0,1429     |
| TcCLB.503439.80  | glycine dehydrogenase [decarboxylating] (pseudogene), putative | 0,4257 | 0,05338    |
| TcCLB.509381.20  | 40S ribosomal protein S15A, putative                           | 0,4256 | 1,392E-06  |
| TcCLB.506529.590 | hypothetical protein, conserved                                | 0,4255 | 0,001409   |

|                  |                                                           |        |            |
|------------------|-----------------------------------------------------------|--------|------------|
| TcCLB.503431.80  | hypothetical protein, conserved                           | 0,4255 | 0,003621   |
| TcCLB.508071.80  | trans-sialidase (pseudogene), putative                    | 0,4255 | 0,004343   |
| TcCLB.511081.60  | mucin-associated surface protein (MASP), putative         | 0,4254 | 0,4733     |
| TcCLB.454403.10  | trans-sialidase (pseudogene), putative                    | 0,4253 | 0,000878   |
| TcCLB.507241.39  | ABC transporter, putative                                 | 0,4251 | 0,0000616  |
| TcCLB.509753.270 | trans-sialidase (pseudogene), putative                    | 0,4251 | 0,1719     |
| TcCLB.506605.139 | hypothetical protein, conserved                           | 0,4248 | 0,0143     |
| TcCLB.509683.70  | dynein light chain Tctex-type, putative                   | 0,4247 | 0,007169   |
| TcCLB.504173.30  | hypothetical protein, conserved                           | 0,4247 | 0,1448     |
| TcCLB.506127.9   | phosphoglycerate kinase, putative                         | 0,4247 | 0,1981     |
| TcCLB.510165.54  | hypothetical protein, conserved                           | 0,4243 | 0,0192     |
| TcCLB.503885.30  | hypothetical protein, conserved (pseudogene)              | 0,4242 | 0,0179     |
| TcCLB.506249.20  | protein transport protein Sec23A, putative                | 0,4241 | 0,00001022 |
| TcCLB.508719.60  | kinetoplast DNA-associated protein, putative              | 0,4241 | 0,02691    |
| TcCLB.506803.14  | hypothetical protein                                      | 0,4239 | 0,05073    |
| TcCLB.506991.19  | hypothetical protein, conserved                           | 0,4238 | 0,05022    |
| TcCLB.511393.30  | formin homology 2 (FH2) domain protein, putative          | 0,4237 | 1,431E-06  |
| TcCLB.510759.70  | hypothetical protein, conserved                           | 0,4237 | 0,00001553 |
| TcCLB.510091.60  | hypothetical protein, conserved                           | 0,4237 | 0,001047   |
| TcCLB.506355.150 | hypothetical protein, conserved                           | 0,4237 | 0,01406    |
| TcCLB.510397.5   | GTP-binding protein, putative (fragment)                  | 0,4235 | 0,003569   |
| TcCLB.399685.10  | trans-sialidase, putative (fragment)                      | 0,4235 | 0,1703     |
| TcCLB.503735.49  | hypothetical protein, conserved                           | 0,4234 | 0,06075    |
| TcCLB.507163.11  | mucin TcMUCII, putative (fragment)                        | 0,4234 | 0,5485     |
| TcCLB.488767.20  | retrotransposon hot spot protein (RHS, pseudogene), putat | 0,4233 | 0,02376    |
| TcCLB.510631.11  | retrotransposon hot spot protein (RHS, pseudogene), putat | 0,4231 | 0,001808   |
| TcCLB.506213.20  | hypothetical protein, conserved                           | 0,4231 | 0,03621    |
| TcCLB.507641.100 | hypothetical protein, conserved                           | 0,423  | 0,0002038  |
| TcCLB.504009.70  | succinate dehydrogenase cytochrome B subunit              | 0,4229 | 0,001158   |
| TcCLB.510289.10  | hypothetical protein, conserved                           | 0,4229 | 0,03479    |
| TcCLB.510519.60  | calcineurin B subunit, putative (CNB)                     | 0,4228 | 0,01578    |
| TcCLB.503667.39  | dispersed gene family protein 1 (DGF-1), putative (fragme | 0,4228 | 0,1157     |
| TcCLB.504073.10  | endonuclease/exonuclease/phosphatase, putative            | 0,4227 | 0,0008056  |
| TcCLB.508839.20  | hypothetical protein, conserved                           | 0,4227 | 0,002813   |
| TcCLB.509885.30  | SPFH domain / Band 7 family protein, putative             | 0,4227 | 0,00317    |
| TcCLB.506599.70  | mucin TcMUCII, putative                                   | 0,4227 | 0,5407     |
| TcCLB.510733.20  | hypothetical protein, conserved                           | 0,4224 | 0,0008924  |
| TcCLB.510583.180 | mucin-associated surface protein (MASP, pseudogene), pu   | 0,4224 | 0,4351     |
| TcCLB.504069.50  | peroxin 14, putative                                      | 0,4223 | 0,00005249 |
| TcCLB.503745.30  | ascorbate peroxidase (APX)                                | 0,4222 | 0,00912    |
| TcCLB.508071.50  | surface protease GP63, putative                           | 0,4221 | 0,5829     |
| TcCLB.508501.220 | hypothetical protein, conserved                           | 0,422  | 0,001419   |
| TcCLB.506451.35  | hypothetical protein                                      | 0,422  | 0,2445     |
| TcCLB.508689.30  | hypothetical protein, conserved                           | 0,4218 | 0,001607   |
| TcCLB.506613.60  | mucin TcMUCII (pseudogene), putative                      | 0,4218 | 0,3736     |



|                  |                                                           |        |            |
|------------------|-----------------------------------------------------------|--------|------------|
| TcCLB.507093.100 | hypothetical protein, conserved                           | 0,4216 | 0,0007489  |
| TcCLB.508453.10  | mucin-associated surface protein (MASP), putative         | 0,4216 | 0,1386     |
| TcCLB.511747.14  | hypothetical protein, conserved                           | 0,4215 | 0,03784    |
| TcCLB.509685.40  | trans-sialidase, Group V, putative                        | 0,4215 | 0,06295    |
| TcCLB.506773.130 | pumilio-repeat, RNA-binding protein, putative             | 0,4213 | 2,521E-06  |
| TcCLB.509905.150 | trans-sialidase, Group II, putative                       | 0,4211 | 0,00001806 |
| TcCLB.510283.120 | hypothetical protein, conserved                           | 0,4211 | 0,001833   |
| TcCLB.507049.170 | Axonemal inner arm dynein light chain, putative           | 0,4211 | 0,002641   |
| TcCLB.508633.120 | trans-sialidase (pseudogene), putative                    | 0,4209 | 0,1147     |
| TcCLB.508853.30  | hypothetical protein                                      | 0,4209 | 0,2707     |
| TcCLB.508209.130 | hypothetical protein, conserved                           | 0,4208 | 0,000546   |
| TcCLB.458759.14  | hypothetical protein, conserved                           | 0,4207 | 0,000634   |
| TcCLB.503999.60  | phosphoprotein phosphatase, putative                      | 0,4205 | 0,0003933  |
| TcCLB.511655.10  | hypothetical protein, conserved                           | 0,4205 | 0,0545     |
| TcCLB.510033.30  | trans-sialidase, Group V, putative                        | 0,4201 | 0,1393     |
| TcCLB.506279.30  | mucin TcMUCII, putative                                   | 0,4201 | 0,3159     |
| TcCLB.511239.30  | hypothetical protein, conserved                           | 0,4197 | 0,01424    |
| TcCLB.509055.54  | hypothetical protein, conserved                           | 0,4197 | 0,1057     |
| TcCLB.507091.10  | hypothetical protein, conserved                           | 0,4195 | 0,3568     |
| TcCLB.504057.50  | hypothetical protein, conserved                           | 0,4194 | 0,0005376  |
| TcCLB.510361.260 | mucin-associated surface protein (MASP), putative         | 0,4194 | 0,5194     |
| TcCLB.509453.40  | RNA polymerase subunit RPB10, putative (RPB10)            | 0,4193 | 0,05546    |
| TcCLB.509103.30  | hypothetical protein, conserved                           | 0,4192 | 0,1189     |
| TcCLB.508919.150 | retrotransposon hot spot protein (RHS, pseudogene), putat | 0,4191 | 0,08196    |
| TcCLB.510009.19  | hypothetical protein, conserved (fragment)                | 0,4191 | 0,1645     |
| TcCLB.508365.140 | hypothetical protein                                      | 0,419  | 0,3274     |
| TcCLB.507023.150 | hypothetical protein                                      | 0,4187 | 0,002942   |
| TcCLB.506615.150 | trans-sialidase, Group V, putative                        | 0,4186 | 0,009331   |
| TcCLB.506321.270 | hypothetical protein, conserved                           | 0,4185 | 0,018      |
| TcCLB.509419.20  | mucin-associated surface protein (MASP), putative         | 0,4185 | 0,6622     |
| TcCLB.507539.10  | hypothetical protein, conserved                           | 0,4184 | 0,09842    |
| TcCLB.506965.140 | mucin-associated surface protein (MASP), putative         | 0,4184 | 0,2088     |
| TcCLB.504239.365 | surface protease GP63 (pseudogene), putative              | 0,4183 | 0,6145     |
| TcCLB.510981.20  | trans-sialidase, putative                                 | 0,4181 | 0,02895    |
| TcCLB.508173.84  | hypothetical protein, conserved                           | 0,418  | 0,0004194  |
| TcCLB.506797.60  | hypothetical protein, conserved                           | 0,4177 | 0,004133   |
| TcCLB.511151.100 | Unconventional myosin                                     | 0,4175 | 0,00003526 |
| TcCLB.511259.170 | trans-sialidase (pseudogene), putative                    | 0,4175 | 0,2285     |
| TcCLB.511077.150 | hypothetical protein                                      | 0,4174 | 0,5874     |
| TcCLB.509525.360 | mucin-associated surface protein (MASP, pseudogene), pu   | 0,4173 | 0,4182     |
| TcCLB.507053.90  | conserved protein, unknown function                       | 0,417  | 0,002012   |
| TcCLB.509079.20  | mucin-associated surface protein (MASP), putative         | 0,417  | 0,4691     |
| TcCLB.506697.70  | hypothetical protein, conserved                           | 0,4169 | 0,003462   |
| TcCLB.510121.50  | calmodulin, putative                                      | 0,4169 | 0,07184    |
| TcCLB.511553.120 | surface protease GP63, putative                           | 0,4169 | 0,298      |

|                  |                                                           |        |            |
|------------------|-----------------------------------------------------------|--------|------------|
| TcCLB.509509.20  | C-1-tetrahydrofolate synthase, cytoplasmic, putative      | 0,4168 | 0,01052    |
| TcCLB.510565.70  | protein kinase, putative                                  | 0,4165 | 8,179E-06  |
| TcCLB.510877.55  | acyl-CoA binding protein, putative                        | 0,4164 | 0,002401   |
| TcCLB.504029.70  | hypothetical protein, conserved                           | 0,4163 | 0,005034   |
| TcCLB.507937.20  | mucin-associated surface protein (MASP, pseudogene), pu   | 0,4159 | 0,4057     |
| TcCLB.510041.20  | zinc carboxypeptidase, putative                           | 0,4157 | 0,1292     |
| TcCLB.506939.40  | mucin TcMUCII, putative                                   | 0,4157 | 0,4595     |
| TcCLB.509743.40  | trans-sialidase, putative                                 | 0,4157 | 0,4913     |
| TcCLB.509899.10  | trans-sialidase (pseudogene), putative                    | 0,4156 | 0,0203     |
| TcCLB.508475.10  | ribosomal protein S20, putative                           | 0,4155 | 0,0002927  |
| TcCLB.506653.40  | trans-sialidase (pseudogene), putative                    | 0,4155 | 0,02423    |
| TcCLB.509127.30  | hypothetical protein, conserved                           | 0,4155 | 0,1047     |
| TcCLB.510901.200 | differentiation inhibitory kinase, putative (ZFK)         | 0,4154 | 0,00005749 |
| TcCLB.503587.10  | mucin-associated surface protein (MASP), putative         | 0,4154 | 0,6507     |
| TcCLB.511389.10  | hypothetical protein, conserved                           | 0,4153 | 0,001861   |
| TcCLB.507927.4   | rac serine-threonine kinase, putative                     | 0,4152 | 0,03178    |
| TcCLB.505533.10  | dispersed gene family protein 1 (DGF-1, pseudogene), puta | 0,4152 | 0,307      |
| TcCLB.508387.120 | glutaminy cyclase, putative                               | 0,4151 | 0,00002496 |
| TcCLB.508679.7   | hypothetical protein, conserved (pseudogene)              | 0,4151 | 0,3331     |
| TcCLB.453767.50  | mucin-associated surface protein (MASP), putative         | 0,4151 | 0,4777     |
| TcCLB.508737.110 | hypothetical protein, conserved                           | 0,415  | 0,0006011  |
| TcCLB.509237.140 | calpain-like cysteine peptidase, putative                 | 0,415  | 0,008329   |
| TcCLB.508347.24  | hypothetical protein, conserved                           | 0,415  | 0,03224    |
| TcCLB.509303.10  | retrotransposon hot spot protein (RHS, pseudogene), putat | 0,4148 | 0,07469    |
| TcCLB.511257.80  | hypothetical protein                                      | 0,4147 | 0,129      |
| TcCLB.511257.60  | surface protease GP63, putative                           | 0,4144 | 0,02482    |
| TcCLB.510989.10  | fatty acid elongase, putative                             | 0,4143 | 0,01103    |
| TcCLB.507295.30  | mucin TcMUCII, putative                                   | 0,4141 | 0,1429     |
| TcCLB.509723.10  | protein kinase, putative                                  | 0,4141 | 0,1962     |
| TcCLB.508633.30  | mucin-associated surface protein (MASP, pseudogene), pu   | 0,414  | 0,4204     |
| TcCLB.506885.10  | alpha-1,2-mannosyltransferase, putative                   | 0,4139 | 0,0008251  |
| TcCLB.511903.270 | hypothetical protein, conserved                           | 0,4138 | 0,09744    |
| TcCLB.510275.250 | mucin-associated surface protein (MASP), putative         | 0,4138 | 0,1458     |
| TcCLB.506303.80  | hypothetical protein, conserved                           | 0,4137 | 1,142E-06  |
| TcCLB.503959.10  | hypothetical protein, conserved                           | 0,4135 | 0,0003576  |
| TcCLB.510587.10  | hypothetical protein                                      | 0,4135 | 0,6715     |
| TcCLB.510355.150 | retrotransposon hot spot protein (RHS, pseudogene), putat | 0,4134 | 0,002919   |
| TcCLB.511807.210 | hypothetical protein, conserved (pseudogene)              | 0,4133 | 0,0000402  |
| TcCLB.509837.10  | hypothetical protein, conserved                           | 0,4133 | 0,0002357  |
| TcCLB.511445.40  | hypothetical protein, conserved                           | 0,4132 | 0,002143   |
| TcCLB.504285.10  | retrotransposon hot spot protein (RHS, pseudogene), putat | 0,4131 | 0,05069    |
| TcCLB.508727.18  | centrin, putative                                         | 0,4129 | 0,01784    |
| TcCLB.509099.170 | hypothetical protein, conserved                           | 0,4128 | 0,08313    |
| TcCLB.508233.4   | protein transport protein Sec23A, putative (fragment)     | 0,4127 | 0,001766   |
| TcCLB.509967.70  | katanin, putative                                         | 0,4127 | 0,2007     |

|                  |                                                           |        |            |
|------------------|-----------------------------------------------------------|--------|------------|
| TcCLB.510907.10  | trans-sialidase, Group VIII, putative                     | 0,4127 | 0,3699     |
| TcCLB.508355.290 | hypothetical protein, conserved                           | 0,4125 | 0,003285   |
| TcCLB.506553.10  | hypothetical protein, conserved                           | 0,4123 | 0,0655     |
| TcCLB.511657.10  | protein kinase, putative                                  | 0,4123 | 0,1149     |
| TcCLB.503431.60  | acid phosphatase, putative (AP)                           | 0,4122 | 0,002907   |
| TcCLB.504239.140 | mucin-associated surface protein (MASP, pseudogene), pu   | 0,4122 | 0,278      |
| TcCLB.508805.30  | choline/ethanolamine kinase (pseudogene), putative        | 0,412  | 0,006566   |
| TcCLB.507803.10  | mucin-associated surface protein (MASP), putative         | 0,412  | 0,3064     |
| TcCLB.508301.20  | metallo-peptidase, Clan ME, Family M16                    | 0,4118 | 0,0004882  |
| TcCLB.510693.60  | retrotransposon hot spot protein (RHS, pseudogene), putat | 0,4118 | 0,4326     |
| TcCLB.508741.200 | hypothetical protein, conserved                           | 0,4117 | 6,348E-06  |
| TcCLB.508787.20  | hypothetical protein                                      | 0,4117 | 0,0003514  |
| TcCLB.508535.20  | nuclear transmembrane protein, putative (NP)              | 0,4117 | 0,0008922  |
| TcCLB.503507.35  | mucin-associated surface protein (MASP, pseudogene), pu   | 0,4112 | 0,2        |
| TcCLB.510873.10  | NAD(P)-dependent steroid dehydrogenase protein, putative  | 0,4111 | 1,031E-06  |
| TcCLB.506799.100 | mucin-like glycoprotein, putative                         | 0,4107 | 0,2679     |
| TcCLB.506831.30  | hypothetical protein, conserved                           | 0,4105 | 0,02547    |
| TcCLB.506755.80  | hypothetical protein                                      | 0,4102 | 0,009765   |
| TcCLB.511641.5   | fucose kinase, putative                                   | 0,4099 | 0,1882     |
| TcCLB.506499.80  | mucin-associated surface protein (MASP), putative         | 0,4099 | 0,5866     |
| TcCLB.510121.70  | hypothetical protein, conserved                           | 0,4098 | 0,0001345  |
| TcCLB.511249.110 | kinesin K39 (pseudogene), putative                        | 0,4096 | 0,0002408  |
| TcCLB.510307.220 | retrotransposon hot spot (RHS) protein, putative          | 0,4095 | 0,007433   |
| TcCLB.506627.80  | hypothetical protein, conserved                           | 0,4094 | 0,0004566  |
| TcCLB.507641.70  | hypothetical protein, conserved                           | 0,4094 | 0,002117   |
| TcCLB.511255.210 | mucin TcMUCII, putative                                   | 0,4094 | 0,6445     |
| TcCLB.504231.20  | hypothetical protein, conserved                           | 0,4093 | 0,0000278  |
| TcCLB.509539.10  | trans-sialidase (pseudogene), putative                    | 0,4093 | 0,05689    |
| TcCLB.507035.110 | cAMP response protein 1, putative (CARP1)                 | 0,4092 | 0,004329   |
| TcCLB.506337.4   | short-chain dehydrogenase, putative (fragment)            | 0,4092 | 0,03983    |
| TcCLB.506925.10  | hypothetical protein                                      | 0,4092 | 0,1227     |
| TcCLB.505071.70  | hypothetical protein, conserved                           | 0,409  | 0,0312     |
| TcCLB.508139.80  | trans-sialidase (pseudogene), putative                    | 0,4088 | 0,02894    |
| TcCLB.508541.40  | surface protease GP63 (pseudogene), putative              | 0,4088 | 0,3771     |
| TcCLB.510275.272 | hypothetical protein                                      | 0,4088 | 0,4277     |
| TcCLB.509897.30  | mucin-associated surface protein (MASP, pseudogene), pu   | 0,4087 | 0,3761     |
| TcCLB.506025.50  | Vacuolar proton pump subunit B, putative                  | 0,4086 | 0,00001054 |
| TcCLB.510661.80  | hypothetical protein                                      | 0,4086 | 0,00008433 |
| TcCLB.506131.20  | mucin TcMUCII, putative                                   | 0,4084 | 0,5454     |
| TcCLB.504479.20  | retrotransposon hot spot protein (RHS, pseudogene), putat | 0,4083 | 0,07262    |
| TcCLB.506329.20  | mucin TcMUCII, putative                                   | 0,4082 | 0,5119     |
| TcCLB.508175.309 | 60S ribosomal protein L19, putative                       | 0,4079 | 2,586E-06  |
| TcCLB.507851.30  | hypothetical protein, conserved                           | 0,4079 | 0,00003643 |
| TcCLB.511369.10  | elongation factor 1-alpha, putative                       | 0,4079 | 0,1369     |
| TcCLB.506955.14  | mucin-associated surface protein (MASP, pseudogene), pu   | 0,4079 | 0,3106     |

|                  |                                                           |        |           |
|------------------|-----------------------------------------------------------|--------|-----------|
| TcCLB.508143.80  | mucin-associated surface protein (MASP), putative         | 0,4079 | 0,3801    |
| TcCLB.509921.9   | dispersed gene family protein 1 (DGF-1), putative         | 0,4078 | 0,3405    |
| TcCLB.506209.60  | retrotransposon hot spot protein (RHS, pseudogene), putat | 0,4075 | 0,007019  |
| TcCLB.509551.90  | hypothetical protein, conserved                           | 0,4074 | 0,00713   |
| TcCLB.506885.360 | hypothetical protein, conserved                           | 0,4072 | 0,001984  |
| TcCLB.505071.140 | protein kinase, putative                                  | 0,4071 | 0,001373  |
| TcCLB.507485.140 | tuzin                                                     | 0,4071 | 0,001446  |
| TcCLB.503809.100 | GUP1, putative                                            | 0,407  | 0,0003849 |
| TcCLB.503647.9   | hypothetical protein, conserved                           | 0,407  | 0,0006531 |
| TcCLB.503981.70  | hypothetical protein, conserved                           | 0,4069 | 0,002656  |
| TcCLB.508839.50  | hypothetical protein, conserved                           | 0,4068 | 0,0001939 |
| TcCLB.508273.70  | hypothetical protein, conserved                           | 0,4067 | 0,02741   |
| TcCLB.509785.40  | retrotransposon hot spot protein (RHS, pseudogene), putat | 0,4066 | 0,06089   |
| TcCLB.510101.20  | phosphatidylinositol-4-phosphate 5-kinase, putative       | 0,4063 | 0,004793  |
| TcCLB.507071.70  | mucin-associated surface protein (MASP, pseudogene), pu   | 0,4063 | 0,3252    |
| TcCLB.506599.189 | mucin TcMUCII, putative                                   | 0,4063 | 0,3323    |
| TcCLB.508389.10  | hypothetical protein, conserved                           | 0,4058 | 0,0001797 |
| TcCLB.508659.30  | hypothetical protein, conserved                           | 0,4053 | 0,001112  |
| TcCLB.503525.30  | hypothetical protein, conserved                           | 0,4052 | 0,0008972 |
| TcCLB.511849.30  | mucin-associated surface protein (MASP), putative         | 0,4052 | 0,2834    |
| TcCLB.511661.30  | hypothetical protein, conserved                           | 0,4051 | 7,117E-08 |
| TcCLB.506435.260 | hypothetical protein                                      | 0,4051 | 0,005071  |
| TcCLB.510275.400 | mucin-associated surface protein (MASP), putative         | 0,405  | 0,3503    |
| TcCLB.509599.50  | hypothetical protein, conserved                           | 0,4049 | 0,001431  |
| TcCLB.510003.9   | hypothetical protein, conserved                           | 0,4049 | 0,003726  |
| TcCLB.507067.70  | hypothetical protein                                      | 0,4048 | 0,5556    |
| TcCLB.510509.20  | hypothetical protein, conserved                           | 0,4047 | 0,003128  |
| TcCLB.511281.30  | RNA-binding protein 27, putative (RBP27)                  | 0,4046 | 0,005398  |
| TcCLB.507649.10  | hypothetical protein, conserved                           | 0,4046 | 0,01299   |
| TcCLB.504015.11  | mucin-associated surface protein (MASP), putative (fragm  | 0,4046 | 0,4615    |
| TcCLB.508647.90  | hypothetical protein, conserved                           | 0,4045 | 0,007944  |
| TcCLB.511103.9   | dispersed gene family protein 1 (DGF-1), putative (fragme | 0,4044 | 0,5305    |
| TcCLB.507837.100 | hypothetical protein, conserved                           | 0,4043 | 0,0001278 |
| TcCLB.509265.90  | trans-sialidase, Group II, putative                       | 0,4041 | 0,03124   |
| TcCLB.510303.10  | surface protease GP63, putative                           | 0,4041 | 0,1374    |
| TcCLB.508099.30  | hypothetical protein                                      | 0,4037 | 0,4827    |
| TcCLB.511585.10  | hypothetical protein, conserved                           | 0,4035 | 0,0005757 |
| TcCLB.508927.20  | glycosomal transporter (GAT1), putative (GAT1)            | 0,4035 | 0,003571  |
| TcCLB.506605.59  | adenosine 5'-monophosphoramidase, putative                | 0,4035 | 0,01966   |
| TcCLB.503897.150 | hypothetical protein, conserved                           | 0,4034 | 0,007289  |
| TcCLB.511469.80  | hypothetical protein, conserved                           | 0,4031 | 0,004943  |
| TcCLB.508229.60  | trans-sialidase, Group VII, putative                      | 0,403  | 0,6261    |
| TcCLB.511369.20  | elongation factor 1-alpha, putative                       | 0,4029 | 0,076     |
| TcCLB.510007.50  | hypothetical protein, conserved                           | 0,4027 | 0,0007397 |
| TcCLB.508989.70  | hypothetical protein, conserved                           | 0,4025 | 0,001517  |

|                  |                                                               |        |           |
|------------------|---------------------------------------------------------------|--------|-----------|
| TcCLB.511773.60  | glycine dehydrogenase [decarboxylating] (pseudogene), pu      | 0,4023 | 0,0001115 |
| TcCLB.508645.30  | dynein light chain, putative                                  | 0,4019 | 0,00302   |
| TcCLB.511217.70  | hypothetical protein, conserved                               | 0,4018 | 0,0001414 |
| TcCLB.506559.59  | ubiquitin, putative                                           | 0,4017 | 0,01081   |
| TcCLB.509959.160 | hypothetical protein, conserved (pseudogene)                  | 0,4017 | 0,04896   |
| TcCLB.503593.30  | hypothetical protein, conserved                               | 0,4016 | 0,0005257 |
| TcCLB.510431.10  | isopentenyl-diphosphate delta-isomerase (fragment) (idi1      | 0,4016 | 0,004617  |
| TcCLB.507795.40  | hypothetical protein, conserved                               | 0,4016 | 0,1917    |
| TcCLB.511003.80  | hypothetical protein, conserved                               | 0,4015 | 0,0008025 |
| TcCLB.506733.80  | hypothetical protein, conserved                               | 0,4015 | 0,008589  |
| TcCLB.507801.80  | hypothetical protein, conserved                               | 0,4014 | 0,0552    |
| TcCLB.504797.70  | DNA excision/repair protein SNF2, putative                    | 0,4013 | 6,315E-06 |
| TcCLB.507027.70  | hypothetical protein, conserved                               | 0,4013 | 0,002534  |
| TcCLB.508851.59  | ATP synthase, putative                                        | 0,4011 | 0,00438   |
| TcCLB.510759.120 | rieske iron-sulfur protein, mitochondrial precursor, putative | 0,4007 | 7,489E-06 |
| TcCLB.511865.40  | hypothetical protein, conserved                               | 0,4006 | 0,001332  |
| TcCLB.508173.80  | hypothetical protein, conserved                               | 0,4003 | 0,0001149 |
| TcCLB.509957.30  | retrotransposon hot spot protein (RHS, pseudogene), putat     | 0,4001 | 0,1258    |
| TcCLB.511825.69  | cyclophilin, putative                                         | 0,3998 | 0,0314    |
| TcCLB.506567.60  | ABC transporter, putative                                     | 0,3996 | 0,0004757 |
| TcCLB.509237.80  | hypothetical protein, conserved                               | 0,3995 | 0,0001721 |
| TcCLB.463155.10  | retrotransposon hot spot protein (RHS, pseudogene), putat     | 0,3993 | 0,01955   |
| TcCLB.511821.50  | hypothetical protein, conserved                               | 0,3989 | 0,02231   |
| TcCLB.504639.40  | trans-sialidase, putative                                     | 0,3984 | 0,2554    |
| TcCLB.510209.9   | trans-sialidase, putative                                     | 0,3983 | 0,5447    |
| TcCLB.448329.10  | trans-sialidase, putative                                     | 0,3982 | 0,5621    |
| TcCLB.506205.40  | protein kinase, putative                                      | 0,3981 | 0,007472  |
| TcCLB.506919.40  | retrotransposon hot spot protein (RHS, pseudogene), putat     | 0,3981 | 0,3347    |
| TcCLB.506865.50  | Present in the outer mitochondrial membrane proteome 4l       | 0,398  | 0,02894   |
| TcCLB.508573.90  | retrotransposon hot spot protein (RHS, pseudogene), putat     | 0,398  | 0,09336   |
| TcCLB.508165.310 | surface protease GP63, putative                               | 0,3975 | 0,2161    |
| TcCLB.506553.30  | GTP-binding protein, putative                                 | 0,3974 | 0,001686  |
| TcCLB.508695.30  | hypothetical protein (fragment)                               | 0,3974 | 0,02831   |
| TcCLB.504741.230 | hypothetical protein, conserved                               | 0,3967 | 0,0009313 |
| TcCLB.511691.30  | ubiquitin activating enzyme, putative                         | 0,3966 | 0,01766   |
| TcCLB.511643.50  | mucin-associated surface protein (MASP, pseudogene), pu       | 0,3965 | 0,3424    |
| TcCLB.510713.50  | beta galactofuranosyl glycosyltransferase (pseudogene), pi    | 0,3964 | 0,3042    |
| TcCLB.507855.9   | dispersed gene family protein 1 (DGF-1), putative (fragme     | 0,3962 | 0,1769    |
| TcCLB.511471.150 | hypothetical protein, conserved (pseudogene)                  | 0,3962 | 0,1838    |
| TcCLB.511755.100 | hypothetical protein, conserved                               | 0,3962 | 0,1965    |
| TcCLB.506237.10  | mismatch repair protein MSH5, putative                        | 0,3961 | 0,01448   |
| TcCLB.509979.174 | mucin-associated surface protein (MASP), putative             | 0,3961 | 0,1639    |
| TcCLB.509013.19  | calpain-like cysteine peptidase, putative (fragment)          | 0,3961 | 0,1786    |
| TcCLB.508437.5   | mucin-like glycoprotein (pseudogene), putative                | 0,396  | 0,4763    |
| TcCLB.506727.4   | hypothetical protein, conserved                               | 0,3959 | 0,1867    |

|                  |                                                            |        |            |
|------------------|------------------------------------------------------------|--------|------------|
| TcCLB.455171.9   | trans-sialidase, putative                                  | 0,3959 | 0,2672     |
| TcCLB.507227.9   | hypothetical protein, conserved (fragment)                 | 0,3956 | 0,002107   |
| TcCLB.505807.150 | Leucine-rich repeat, ribonuclease inhibitor subtype domain | 0,3954 | 0,006445   |
| TcCLB.507529.50  | hypothetical protein, conserved                            | 0,3953 | 4,809E-07  |
| TcCLB.510489.20  | mucin-associated surface protein (MASP), putative          | 0,3953 | 0,3281     |
| TcCLB.506163.40  | vacuolar type h ATPase subunit, putative                   | 0,3953 | 0,3842     |
| TcCLB.503665.15  | trans-sialidase (pseudogene), putative                     | 0,3952 | 0,04264    |
| TcCLB.510431.290 | hypothetical protein                                       | 0,3952 | 0,1304     |
| TcCLB.506799.20  | mucin-like glycoprotein, putative                          | 0,3952 | 0,2961     |
| TcCLB.506925.380 | hypothetical protein                                       | 0,395  | 0,007155   |
| TcCLB.503757.20  | hypothetical protein, conserved                            | 0,395  | 0,01872    |
| TcCLB.506425.80  | phosphatidylinositol kinase, putative                      | 0,3949 | 0,002332   |
| TcCLB.509999.60  | lipase domain protein, putative                            | 0,3947 | 9,476E-06  |
| TcCLB.504769.80  | hypothetical protein, conserved                            | 0,3946 | 0,0001169  |
| TcCLB.509665.40  | hypothetical protein                                       | 0,3945 | 0,514      |
| TcCLB.509671.130 | trypanin-like protein (pseudogene), putative               | 0,3944 | 0,005425   |
| TcCLB.510951.19  | hypothetical protein, conserved                            | 0,3944 | 0,06281    |
| TcCLB.506435.150 | hypothetical protein, conserved                            | 0,3942 | 0,0009414  |
| TcCLB.508931.30  | UDP-Gal or UDP-GlcNAc-dependent glycosyltransferase, pu    | 0,3939 | 0,09155    |
| TcCLB.511809.80  | hypothetical protein, conserved                            | 0,3937 | 0,00001218 |
| TcCLB.510425.10  | hypothetical protein, conserved                            | 0,3937 | 0,04544    |
| TcCLB.508001.90  | hypothetical protein, conserved (pseudogene)               | 0,3934 | 0,2247     |
| TcCLB.503911.10  | hypothetical protein                                       | 0,3934 | 0,3498     |
| TcCLB.412723.9   | dispersed gene family protein 1 (DGF-1), putative (fragme  | 0,3933 | 0,2356     |
| TcCLB.504105.160 | splicing factor ptrs1 interacting protein, putative        | 0,3931 | 0,0001745  |
| TcCLB.507603.200 | proteasome regulatory ATPase subunit 3, putative           | 0,3929 | 0,0003976  |
| TcCLB.504143.20  | hypothetical protein, conserved                            | 0,3922 | 0,01047    |
| TcCLB.511887.40  | hypothetical protein, conserved                            | 0,3922 | 0,2105     |
| TcCLB.510243.80  | hypothetical protein, conserved                            | 0,3921 | 0,006875   |
| TcCLB.504137.90  | hypothetical protein, conserved                            | 0,3916 | 0,002297   |
| TcCLB.506155.60  | aldehyde dehydrogenase, putative                           | 0,3915 | 0,0005419  |
| TcCLB.509229.10  | hypothetical protein, conserved                            | 0,3915 | 0,003479   |
| TcCLB.509977.15  | surface protease GP63 (pseudogene), putative               | 0,3915 | 0,2877     |
| TcCLB.509349.30  | hypothetical protein                                       | 0,3914 | 0,2297     |
| TcCLB.507071.340 | hypothetical protein                                       | 0,3914 | 0,2961     |
| TcCLB.508081.80  | hypothetical protein                                       | 0,3914 | 0,5717     |
| TcCLB.511277.180 | hypothetical protein, conserved                            | 0,3913 | 0,0001319  |
| TcCLB.506329.59  | mucin-associated surface protein (MASP, pseudogene), pu    | 0,3913 | 0,2674     |
| TcCLB.509599.40  | hypothetical protein, conserved                            | 0,3908 | 0,03521    |
| TcCLB.511561.11  | hypothetical protein, conserved (pseudogene)               | 0,3908 | 0,04268    |
| TcCLB.508269.20  | hypothetical protein, conserved                            | 0,3908 | 0,05164    |
| TcCLB.511817.110 | hypothetical protein, conserved                            | 0,3907 | 0,002489   |
| TcCLB.509591.60  | phospholipid-transporting ATPase 1-like protein, putative  | 0,3905 | 0,5357     |
| TcCLB.503487.70  | hypothetical protein, conserved                            | 0,3904 | 0,0002725  |
| TcCLB.507641.239 | hypothetical protein, conserved                            | 0,3903 | 0,001726   |

|                  |                                                            |        |            |
|------------------|------------------------------------------------------------|--------|------------|
| TcCLB.510303.20  | surface protease GP63, putative                            | 0,39   | 0,2278     |
| TcCLB.510741.190 | hypothetical protein, conserved (pseudogene)               | 0,3899 | 0,006525   |
| TcCLB.508001.106 | serine/threonine protein kinase (pseudogene), putative     | 0,3898 | 0,3395     |
| TcCLB.510303.230 | hypothetical protein, conserved                            | 0,3897 | 0,0007284  |
| TcCLB.504787.47  | elongation factor 1-gamma (EF-1-gamma, pseudogene), p      | 0,3896 | 0,546      |
| TcCLB.510759.134 | chaperone DNAJ protein, putative                           | 0,3895 | 0,003458   |
| TcCLB.511867.20  | hypothetical protein, conserved                            | 0,3895 | 0,03428    |
| TcCLB.508883.48  | trans-sialidase, putative                                  | 0,3894 | 0,1878     |
| TcCLB.510335.30  | hypothetical protein, conserved (pseudogene)               | 0,3893 | 0,00001914 |
| TcCLB.504089.50  | flagellar radial spoke component, putative                 | 0,3893 | 0,0004198  |
| TcCLB.507669.14  | hypothetical protein, conserved                            | 0,3893 | 0,004927   |
| TcCLB.510429.30  | hypothetical protein, conserved                            | 0,3893 | 0,01092    |
| TcCLB.509967.180 | hypothetical protein, conserved                            | 0,3892 | 0,008852   |
| TcCLB.510373.119 | mucin-associated surface protein (MASP), putative          | 0,3891 | 0,4736     |
| TcCLB.506617.20  | surface protein TolT (TolT)                                | 0,3889 | 0,0149     |
| TcCLB.509699.60  | mucin-associated surface protein (MASP, pseudogene), pu    | 0,3887 | 0,1207     |
| TcCLB.425597.10  | trans-sialidase (pseudogene), putative                     | 0,3887 | 0,3781     |
| TcCLB.508247.149 | dispersed gene family protein 1 (DGF-1), putative          | 0,3886 | 0,5326     |
| TcCLB.506823.65  | trans-sialidase (pseudogene), putative                     | 0,3884 | 0,2031     |
| TcCLB.510241.130 | tyrosine phosphatase-like protein (pseudogene), putative   | 0,3881 | 0,007931   |
| TcCLB.506147.220 | hypothetical protein, conserved                            | 0,3879 | 0,00145    |
| TcCLB.510583.34  | mucin-associated surface protein (MASP, pseudogene), pu    | 0,3879 | 0,3574     |
| TcCLB.510267.10  | hypothetical protein, conserved                            | 0,3878 | 0,002108   |
| TcCLB.503987.4   | Ras-related protein RAB2B, putative (fragment) (RAB2B)     | 0,3877 | 0,04474    |
| TcCLB.503687.58  | AMP deaminase, putative                                    | 0,3876 | 0,09171    |
| TcCLB.507055.10  | hypothetical protein, conserved                            | 0,3875 | 0,1525     |
| TcCLB.506789.310 | hypothetical protein, conserved                            | 0,387  | 0,005613   |
| TcCLB.509561.9   | hypothetical protein, conserved                            | 0,3869 | 0,02397    |
| TcCLB.511707.10  | hypothetical protein                                       | 0,3869 | 0,05744    |
| TcCLB.401041.10  | retrotransposon hot spot protein (RHS, pseudogene), putat  | 0,3868 | 0,001761   |
| TcCLB.507411.10  | trans-sialidase, Group V, putative                         | 0,3868 | 0,08844    |
| TcCLB.511065.36  | hypothetical protein, conserved                            | 0,3867 | 0,0005762  |
| TcCLB.508939.10  | trans-sialidase (pseudogene), putative                     | 0,3867 | 0,128      |
| TcCLB.506529.190 | hypothetical protein, conserved                            | 0,3863 | 0,01295    |
| TcCLB.509747.70  | actin-like protein, putative                               | 0,3863 | 0,01437    |
| TcCLB.508325.150 | glycine dehydrogenase (pseudogene), putative               | 0,3861 | 0,0001431  |
| TcCLB.508179.30  | hypothetical protein, conserved                            | 0,3861 | 0,004285   |
| TcCLB.511127.70  | hypothetical protein, conserved                            | 0,3859 | 0,003654   |
| TcCLB.509127.97  | hypothetical protein, conserved                            | 0,3859 | 0,02066    |
| TcCLB.506459.40  | dispersed gene family protein 1 (DGF-1, pseudogene), putat | 0,3858 | 0,4714     |
| TcCLB.506559.330 | clathrin coat assembly protein AP17, putative              | 0,3857 | 0,02976    |
| TcCLB.506351.50  | hypothetical protein                                       | 0,3855 | 0,01851    |
| TcCLB.510901.40  | hypothetical protein, conserved                            | 0,3855 | 0,03046    |
| TcCLB.487739.20  | choline/ethanolamine kinase (pseudogene), putative         | 0,3849 | 0,07063    |
| TcCLB.510997.20  | hypothetical protein, conserved                            | 0,3848 | 0,02898    |

|                  |                                                            |        |            |
|------------------|------------------------------------------------------------|--------|------------|
| TcCLB.503511.10  | hypothetical protein, conserved                            | 0,3846 | 0,006571   |
| TcCLB.511765.40  | retrotransposon hot spot protein (RHS, pseudogene), putat  | 0,3846 | 0,02199    |
| TcCLB.510421.90  | protein kinase, putative                                   | 0,3845 | 0,005576   |
| TcCLB.509081.10  | elongation factor 1-gamma (EF-1-gamma), putative           | 0,3845 | 0,1015     |
| TcCLB.510191.70  | mucin-associated surface protein (MASP), putative          | 0,3841 | 0,4644     |
| TcCLB.509221.10  | retrotransposon hot spot protein (RHS, pseudogene), putat  | 0,3839 | 0,002489   |
| TcCLB.510079.40  | dispersed gene family protein 1 (DGF-1, pseudogene), putat | 0,3837 | 0,3056     |
| TcCLB.503755.20  | hypothetical protein                                       | 0,3836 | 0,002777   |
| TcCLB.510657.80  | hypothetical protein, conserved                            | 0,3835 | 0,00171    |
| TcCLB.511185.10  | hypothetical protein                                       | 0,3835 | 0,03718    |
| TcCLB.481211.20  | hypothetical protein                                       | 0,3835 | 0,143      |
| TcCLB.510197.180 | trans-sialidase, Group VI, putative                        | 0,3831 | 0,2474     |
| TcCLB.510759.160 | metacaspase 5, putative                                    | 0,3829 | 0,0009335  |
| TcCLB.506323.40  | trans-sialidase (pseudogene), putative                     | 0,3829 | 0,03666    |
| TcCLB.506067.140 | mucin-associated surface protein (MASP), putative          | 0,3827 | 0,4851     |
| TcCLB.509525.150 | mucin TcMUCII, putative                                    | 0,3827 | 0,4995     |
| TcCLB.511245.160 | fatty acid elongase, putative                              | 0,3825 | 0,2019     |
| TcCLB.507071.60  | mucin TcMUCII, putative                                    | 0,3824 | 0,605      |
| TcCLB.508915.9   | hypothetical protein, conserved                            | 0,3823 | 0,02456    |
| TcCLB.508735.30  | mucin-associated surface protein (MASP), putative          | 0,3823 | 0,04896    |
| TcCLB.506999.40  | metacaspase 5, putative                                    | 0,3822 | 0,000696   |
| TcCLB.506201.170 | flagellar attachment zone protein, putative (FAZ1)         | 0,3821 | 0,00002085 |
| TcCLB.415331.10  | trans-sialidase (pseudogene), putative                     | 0,382  | 0,01042    |
| TcCLB.505267.100 | retrotransposon hot spot protein (RHS, pseudogene), putat  | 0,3819 | 0,006411   |
| TcCLB.503787.20  | mucin TcMUCII, putative                                    | 0,3819 | 0,4342     |
| TcCLB.511653.30  | hypothetical protein, conserved                            | 0,3813 | 0,002368   |
| TcCLB.504933.20  | hypothetical protein                                       | 0,3812 | 0,001601   |
| TcCLB.507849.40  | hypothetical protein, conserved                            | 0,3811 | 0,0000844  |
| TcCLB.508153.310 | protein kinase, putative                                   | 0,3809 | 0,006281   |
| TcCLB.402863.9   | dynein heavy chain, putative (fragment)                    | 0,3808 | 0,0001031  |
| TcCLB.508909.214 | hypothetical protein, conserved                            | 0,3808 | 0,00141    |
| TcCLB.506139.160 | mucin-associated surface protein (MASP), putative          | 0,3808 | 0,3935     |
| TcCLB.511287.124 | peroxin 13, putative (PEX13)                               | 0,3807 | 0,007602   |
| TcCLB.511083.30  | mucin-associated surface protein (MASP), putative          | 0,3806 | 0,5587     |
| TcCLB.511391.200 | pitrilysin-like metalloprotease, putative                  | 0,3805 | 1,376E-07  |
| TcCLB.509217.143 | ATP-dependent DEAD/H RNA helicase (pseudogene), putat      | 0,3805 | 0,4026     |
| TcCLB.511061.20  | mucin-associated surface protein (MASP, pseudogene), pu    | 0,3804 | 0,5995     |
| TcCLB.507313.20  | trans-sialidase, Group VIII, putative                      | 0,3803 | 0,2725     |
| TcCLB.511277.150 | hypothetical protein                                       | 0,3799 | 0,00009823 |
| TcCLB.506227.110 | hypothetical protein, conserved                            | 0,3798 | 0,0201     |
| TcCLB.508871.51  | serine-alanine-and proline-rich protein (pseudogene), puta | 0,3797 | 0,1819     |
| TcCLB.511851.20  | retrotransposon hot spot protein (RHS, pseudogene), putat  | 0,3794 | 0,1462     |
| TcCLB.511239.80  | hypothetical protein, conserved                            | 0,3793 | 0,0141     |
| TcCLB.503929.30  | hypothetical protein, conserved                            | 0,3792 | 0,0004252  |
| TcCLB.506343.51  | retrotransposon hot spot protein (RHS, pseudogene), putat  | 0,3791 | 0,2219     |



|                  |                                                           |        |            |
|------------------|-----------------------------------------------------------|--------|------------|
| TcCLB.504741.240 | hypothetical protein, conserved                           | 0,379  | 0,02913    |
| TcCLB.507625.120 | hypothetical protein, conserved                           | 0,379  | 0,05181    |
| TcCLB.506735.50  | hypothetical protein, conserved                           | 0,3788 | 0,0003707  |
| TcCLB.508589.30  | retrotransposon hot spot (RHS) protein, putative          | 0,3788 | 0,002101   |
| TcCLB.511351.41  | choline/carnitine O-acyltransferase, putative             | 0,3788 | 0,1849     |
| TcCLB.509643.120 | hypothetical protein, conserved                           | 0,3786 | 0,005467   |
| TcCLB.506737.114 | mucin TcMUCI, putative                                    | 0,3786 | 0,2851     |
| TcCLB.510623.20  | mucin-associated surface protein (MASP), putative         | 0,3785 | 0,4415     |
| TcCLB.508021.10  | trans-sialidase, putative                                 | 0,3785 | 0,7912     |
| TcCLB.511079.40  | surface protease GP63 (pseudogene), putative              | 0,3784 | 0,6456     |
| TcCLB.510985.10  | trans-sialidase, putative (fragment)                      | 0,3784 | 0,6909     |
| TcCLB.511727.150 | hypothetical protein, conserved                           | 0,3783 | 0,0001513  |
| TcCLB.511807.290 | hypothetical protein, conserved                           | 0,3783 | 0,0003139  |
| TcCLB.508541.140 | surface protease GP63 (pseudogene), putative              | 0,3779 | 0,2499     |
| TcCLB.504239.195 | mucin-associated surface protein (MASP, pseudogene), pu   | 0,3779 | 0,5119     |
| TcCLB.506985.50  | hypothetical protein, conserved                           | 0,3778 | 0,07159    |
| TcCLB.506933.10  | hypothetical protein, conserved                           | 0,3777 | 0,01541    |
| TcCLB.511023.10  | pyrroline-5-carboxylate synthetase-like protein, putative | 0,3776 | 0,001074   |
| TcCLB.506605.229 | SNF2 DNA repair protein, putative                         | 0,3775 | 0,0006754  |
| TcCLB.510007.10  | hypothetical protein, conserved                           | 0,3774 | 0,09618    |
| TcCLB.506537.120 | hypothetical protein, conserved                           | 0,3774 | 0,2551     |
| TcCLB.510483.270 | hypothetical protein                                      | 0,3774 | 0,519      |
| TcCLB.505945.50  | ATP-dependent chaperone, putative                         | 0,3773 | 0,002562   |
| TcCLB.506945.280 | hypothetical protein, conserved                           | 0,3769 | 8,691E-06  |
| TcCLB.510091.7   | diacylglycerol acyltransferase, putative (fragment)       | 0,3769 | 0,03523    |
| TcCLB.507671.30  | 25 kDa translation elongation factor 1-beta (EF-1-beta)   | 0,3767 | 0,00002867 |
| TcCLB.510359.300 | hypothetical protein, conserved                           | 0,3766 | 0,0005775  |
| TcCLB.510425.28  | hypothetical protein, conserved                           | 0,3762 | 0,2597     |
| TcCLB.508999.110 | hypothetical protein                                      | 0,3762 | 0,697      |
| TcCLB.507601.110 | prolyl oligopeptidase (pseudogene), putative              | 0,3761 | 0,002089   |
| TcCLB.508723.24  | hypothetical protein, conserved                           | 0,3761 | 0,004246   |
| TcCLB.510835.24  | mitochondrial carrier protein, putative                   | 0,376  | 0,02122    |
| TcCLB.510741.124 | hypothetical protein, conserved                           | 0,376  | 0,02422    |
| TcCLB.507819.20  | retrotransposon hot spot protein (RHS, pseudogene), putat | 0,3757 | 0,02796    |
| TcCLB.508723.100 | rab-like GTPase activating protein, putative              | 0,3756 | 0,005243   |
| TcCLB.509527.130 | hypothetical protein                                      | 0,3756 | 0,4343     |
| TcCLB.503939.114 | hypothetical protein, conserved                           | 0,3755 | 0,02293    |
| TcCLB.506779.170 | haloacid dehalogenase hydrolase, putative                 | 0,3752 | 0,008844   |
| TcCLB.504189.5   | trans-sialidase, putative (fragment)                      | 0,3751 | 0,6213     |
| TcCLB.510887.30  | hypothetical protein, conserved                           | 0,3748 | 0,02473    |
| TcCLB.508419.30  | tryptophanyl-tRNA synthetase (pseudogene), putative       | 0,3747 | 0,04556    |
| TcCLB.510657.10  | Flagellar Member 5 (fragment) (FLAM5)                     | 0,3746 | 0,01169    |
| TcCLB.508313.90  | mucin TcMUCII, putative                                   | 0,3744 | 0,199      |
| TcCLB.506459.290 | elongation factor 1-gamma (EF-1-gamma, pseudogene), p     | 0,3742 | 0,00002357 |
| TcCLB.503861.110 | retrotransposon hot spot protein (RHS, pseudogene), putat | 0,3741 | 0,01811    |

|                  |                                                              |        |            |
|------------------|--------------------------------------------------------------|--------|------------|
| TcCLB.509249.20  | trans-sialidase (pseudogene), putative                       | 0,3741 | 0,1285     |
| TcCLB.506629.230 | retrotransposon hot spot protein (RHS, pseudogene), putative | 0,374  | 0,001685   |
| TcCLB.511277.175 | ribosomal protein S27, putative                              | 0,3738 | 0,0002302  |
| TcCLB.506925.14  | hypothetical protein, conserved                              | 0,3737 | 0,00008052 |
| TcCLB.510053.30  | hypothetical protein, conserved                              | 0,3737 | 0,005319   |
| TcCLB.511813.30  | proteasome regulatory ATPase subunit 5, putative             | 0,3737 | 0,01419    |
| TcCLB.511301.50  | hypothetical protein, conserved                              | 0,3735 | 0,0004327  |
| TcCLB.510125.20  | trans-sialidase, Group VIII, putative                        | 0,3735 | 0,5449     |
| TcCLB.511165.80  | protein kinase, putative                                     | 0,3734 | 0,7351     |
| TcCLB.509997.60  | hypothetical protein, conserved                              | 0,373  | 0,00005289 |
| TcCLB.511439.50  | zinc transporter, putative                                   | 0,373  | 0,004434   |
| TcCLB.508831.250 | dispersed gene family protein 1 (DGF-1), putative            | 0,373  | 0,07069    |
| TcCLB.509777.40  | beta galactofuranosyl glycosyltransferase, putative          | 0,373  | 0,1139     |
| TcCLB.409407.10  | trans-sialidase (pseudogene), putative                       | 0,3729 | 0,3507     |
| TcCLB.510199.10  | GP85-like protein, putative                                  | 0,3729 | 0,5431     |
| TcCLB.511255.313 | syntaxin binding protein (pseudogene), putative              | 0,3728 | 0,4398     |
| TcCLB.510735.40  | hypothetical protein, conserved                              | 0,3727 | 0,001756   |
| TcCLB.511625.100 | mucin TcMUCII, putative                                      | 0,3726 | 0,4202     |
| TcCLB.508163.210 | trans-sialidase (pseudogene), putative                       | 0,3724 | 0,2856     |
| TcCLB.507467.110 | hypothetical protein, conserved                              | 0,3722 | 0,0001839  |
| TcCLB.433733.10  | trans-sialidase, putative                                    | 0,3721 | 0,1694     |
| TcCLB.508903.110 | trans-sialidase, putative                                    | 0,3716 | 0,3079     |
| TcCLB.508023.20  | trans-sialidase (pseudogene), putative                       | 0,3715 | 0,1708     |
| TcCLB.510483.180 | mucin-associated surface protein (MASP), putative            | 0,3715 | 0,485      |
| TcCLB.508917.20  | hypothetical protein, conserved                              | 0,3714 | 0,01569    |
| TcCLB.511841.10  | trans-sialidase (pseudogene), putative                       | 0,3712 | 0,496      |
| TcCLB.510293.54  | hypothetical protein, conserved                              | 0,3711 | 0,002731   |
| TcCLB.506695.30  | protein kinase, putative                                     | 0,371  | 0,03071    |
| TcCLB.503839.10  | hypothetical protein, conserved                              | 0,3705 | 0,005402   |
| TcCLB.467287.10  | alpha-tubulin N-acetyltransferase, putative                  | 0,3705 | 0,02994    |
| TcCLB.508767.10  | surface protein TolT                                         | 0,3704 | 0,05114    |
| TcCLB.506469.10  | hypothetical protein, conserved                              | 0,3702 | 0,02702    |
| TcCLB.506793.30  | kinesin, putative                                            | 0,37   | 0,0007181  |
| TcCLB.510609.40  | ATP synthase F1, alpha subunit, putative (pseudogene)        | 0,3699 | 5,867E-07  |
| TcCLB.503527.29  | hypothetical protein, conserved                              | 0,3698 | 0,01259    |
| TcCLB.463323.10  | trans-sialidase, Group II, putative                          | 0,3698 | 0,1128     |
| TcCLB.508043.30  | ubiquitin-activating enzyme E1, putative                     | 0,3696 | 8,737E-07  |
| TcCLB.507817.80  | 5'-3' exoribonuclease A, putative (fragment) (XRNA)          | 0,3696 | 4,826E-06  |
| TcCLB.509549.20  | mucin-associated surface protein (MASP), putative            | 0,3696 | 0,2366     |
| TcCLB.404073.10  | hypothetical protein, conserved                              | 0,3694 | 0,2742     |
| TcCLB.506465.50  | serine/threonine protein phosphatase-like protein, putative  | 0,3693 | 0,1729     |
| TcCLB.507821.40  | trans-sialidase (pseudogene), putative                       | 0,3692 | 0,1219     |
| TcCLB.507381.41  | trans-sialidase (pseudogene), putative                       | 0,3692 | 0,1378     |
| TcCLB.508257.210 | hypothetical protein, conserved                              | 0,3691 | 0,003911   |
| TcCLB.508799.60  | DNA ligase, putative                                         | 0,3691 | 0,01642    |

|                  |                                                           |        |           |
|------------------|-----------------------------------------------------------|--------|-----------|
| TcCLB.511731.10  | UV excision repair RAD23-like protein, putative           | 0,369  | 0,0006113 |
| TcCLB.503783.70  | mucin TcMUCII, putative                                   | 0,369  | 0,4137    |
| TcCLB.510089.180 | hypothetical protein, conserved                           | 0,3688 | 0,006976  |
| TcCLB.509109.100 | hypothetical protein, conserved                           | 0,3687 | 0,145     |
| TcCLB.511373.30  | mucin-associated surface protein (MASP), putative         | 0,3685 | 0,672     |
| TcCLB.506859.170 | hypothetical protein, conserved                           | 0,3684 | 0,0009815 |
| TcCLB.511587.100 | retrotransposon hot spot (RHS) protein, putative          | 0,3683 | 0,002571  |
| TcCLB.508165.110 | mucin-associated surface protein (MASP), putative         | 0,3681 | 0,5487    |
| TcCLB.506401.24  | hypothetical protein, conserved                           | 0,3678 | 0,005771  |
| TcCLB.509965.134 | hypothetical protein, conserved                           | 0,3677 | 0,1813    |
| TcCLB.508461.234 | hypothetical protein, conserved                           | 0,3674 | 0,05365   |
| TcCLB.504085.70  | Zinc finger protein, C3H1 type-like (ZC3H46)              | 0,3674 | 0,5838    |
| TcCLB.508165.430 | trans-sialidase, putative                                 | 0,3669 | 0,3183    |
| TcCLB.508815.50  | hypothetical protein, conserved                           | 0,3668 | 0,005308  |
| TcCLB.508175.9   | hypothetical protein, conserved (fragment)                | 0,3666 | 0,002874  |
| TcCLB.506187.40  | trans-sialidase (pseudogene), putative                    | 0,3666 | 0,2624    |
| TcCLB.511003.140 | vacuolar transport protein 4A, putative                   | 0,3665 | 0,005299  |
| TcCLB.506635.30  | hypothetical protein, conserved                           | 0,3664 | 0,002466  |
| TcCLB.508461.550 | hypothetical protein, conserved                           | 0,3664 | 0,003421  |
| TcCLB.506855.130 | hypothetical protein, conserved                           | 0,3664 | 0,03776   |
| TcCLB.511087.4   | mucin TcMUCII (pseudogene), putative                      | 0,3664 | 0,4236    |
| TcCLB.488591.10  | trans-sialidase, putative (fragment)                      | 0,3663 | 0,1487    |
| TcCLB.503897.140 | hypothetical protein, conserved                           | 0,3662 | 0,01333   |
| TcCLB.511257.10  | DNAK protein, putative                                    | 0,3659 | 0,0004041 |
| TcCLB.509561.130 | hypothetical protein, conserved                           | 0,3657 | 0,005344  |
| TcCLB.506127.40  | hypothetical protein, conserved                           | 0,3657 | 0,036     |
| TcCLB.504163.100 | hypothetical protein, conserved                           | 0,3654 | 0,001699  |
| TcCLB.509259.129 | hypothetical protein, conserved (pseudogene)              | 0,3654 | 0,2102    |
| TcCLB.503871.10  | trans-sialidase (pseudogene), putative                    | 0,3654 | 0,2792    |
| TcCLB.509105.10  | hypothetical protein, conserved                           | 0,3653 | 0,00728   |
| TcCLB.510933.80  | trans-sialidase, Group V, putative                        | 0,3653 | 0,3486    |
| TcCLB.510253.10  | hypothetical protein, conserved                           | 0,3652 | 0,01665   |
| TcCLB.509809.10  | NADH-ubiquinone oxidoreductase complex I subunit, putati  | 0,3651 | 0,004076  |
| TcCLB.510719.220 | hypothetical protein                                      | 0,3651 | 0,03971   |
| TcCLB.509063.2   | hypothetical protein, conserved (fragment)                | 0,3651 | 0,4625    |
| TcCLB.504161.10  | hypothetical protein                                      | 0,365  | 0,01501   |
| TcCLB.507959.260 | mucin-associated surface protein (MASP), putative         | 0,365  | 0,446     |
| TcCLB.507949.4   | cytidine triphosphate synthase, putative                  | 0,3649 | 0,0284    |
| TcCLB.508911.50  | fructosamine kinase, putative                             | 0,3649 | 0,05444   |
| TcCLB.506409.100 | mucin TcMUCII, putative                                   | 0,3647 | 0,3341    |
| TcCLB.503587.64  | retrotransposon hot spot protein (RHS, pseudogene), putat | 0,3644 | 0,3651    |
| TcCLB.504153.230 | hypothetical protein, conserved                           | 0,3643 | 0,0128    |
| TcCLB.510355.90  | dispersed gene family protein 1 (DGF-1), putative         | 0,3642 | 0,05953   |
| TcCLB.506767.340 | mucin-associated surface protein (MASP), putative         | 0,3642 | 0,2633    |
| TcCLB.510239.40  | mucin-associated surface protein (MASP, pseudogene), pu   | 0,3642 | 0,3145    |

|                  |                                                               |        |            |
|------------------|---------------------------------------------------------------|--------|------------|
| TcCLB.509805.84  | hypothetical protein, conserved                               | 0,3641 | 0,07147    |
| TcCLB.508369.10  | hypothetical protein, conserved                               | 0,3641 | 0,08008    |
| TcCLB.508877.30  | retrotransposon hot spot protein (RHS, pseudogene), putative  | 0,3639 | 0,2582     |
| TcCLB.506763.290 | mucin TcMUCII, putative                                       | 0,3639 | 0,5033     |
| TcCLB.506685.20  | hypothetical protein, conserved                               | 0,3637 | 0,004683   |
| TcCLB.509669.70  | hypothetical protein, conserved                               | 0,3635 | 0,0000299  |
| TcCLB.511209.54  | ribosomal protein S29, putative                               | 0,3634 | 0,0009798  |
| TcCLB.509533.5   | retrotransposon hot spot protein (RHS, pseudogene), putative  | 0,3634 | 0,002095   |
| TcCLB.506617.10  | surface protein TolT (TolT)                                   | 0,3634 | 0,009627   |
| TcCLB.511391.170 | hypothetical protein, conserved                               | 0,3632 | 0,007251   |
| TcCLB.506629.240 | retrotransposon hot spot (RHS) protein, putative (fragment)   | 0,3632 | 0,5349     |
| TcCLB.410923.40  | trans-sialidase (pseudogene), putative                        | 0,363  | 0,03586    |
| TcCLB.511449.30  | mucin-associated surface protein (MASP), putative             | 0,363  | 0,3148     |
| TcCLB.507163.40  | mucin-associated surface protein (MASP), putative             | 0,3629 | 0,462      |
| TcCLB.510431.150 | glycosomal transporter (GAT2), putative (GAT2)                | 0,3628 | 6,843E-06  |
| TcCLB.509611.70  | hypothetical protein, conserved                               | 0,3628 | 0,06254    |
| TcCLB.506969.10  | mucin-associated surface protein (MASP, pseudogene), putative | 0,3628 | 0,1144     |
| TcCLB.511145.50  | vacuolar ATP synthase, putative                               | 0,3627 | 0,00008231 |
| TcCLB.506195.40  | hypothetical protein, conserved                               | 0,3626 | 0,05919    |
| TcCLB.504191.19  | sterol 24-c-methyltransferase, putative                       | 0,3626 | 0,07346    |
| TcCLB.506779.60  | DNA-directed RNA polymerase II, subunit 9, putative           | 0,3625 | 0,03488    |
| TcCLB.511921.150 | trans-sialidase, Group V, putative                            | 0,3625 | 0,1788     |
| TcCLB.504081.490 | mucin-associated surface protein (MASP), putative             | 0,3625 | 0,4434     |
| TcCLB.506517.158 | hypothetical protein, conserved                               | 0,3622 | 0,03267    |
| TcCLB.507015.10  | retrotransposon hot spot (RHS) protein, putative              | 0,3621 | 0,00001451 |
| TcCLB.506155.40  | hypothetical protein, conserved                               | 0,3618 | 0,0004429  |
| TcCLB.506513.170 | hypothetical protein, conserved (pseudogene)                  | 0,3617 | 0,003212   |
| TcCLB.504239.260 | trans-sialidase, Group V, putative                            | 0,3617 | 0,4165     |
| TcCLB.510603.40  | hypothetical protein, conserved                               | 0,3616 | 0,001669   |
| TcCLB.506529.470 | hypothetical protein, conserved                               | 0,3615 | 0,00006826 |
| TcCLB.508153.240 | hypothetical protein, conserved                               | 0,3613 | 0,004577   |
| TcCLB.511575.50  | hypothetical protein, conserved                               | 0,3611 | 0,00003311 |
| TcCLB.510997.10  | 3-keto-dihydrosphingosine reductase                           | 0,3611 | 0,004742   |
| TcCLB.510361.130 | serine-alanine-and proline-rich protein, putative             | 0,3611 | 0,6787     |
| TcCLB.511847.40  | hypothetical protein, conserved                               | 0,3608 | 0,1322     |
| TcCLB.506613.100 | mucin TcMUCII (pseudogene), putative                          | 0,3607 | 0,4494     |
| TcCLB.510191.80  | mucin TcMUCII, putative                                       | 0,3606 | 0,5935     |
| TcCLB.506883.9   | isopentenyl-diphosphate delta-isomerase (type II), putative   | 0,3605 | 0,03729    |
| TcCLB.510565.170 | hypothetical protein, conserved                               | 0,3605 | 0,4532     |
| TcCLB.510483.240 | mucin-associated surface protein (MASP, pseudogene), putative | 0,3601 | 0,324      |
| TcCLB.508145.10  | RNA-binding protein, putative                                 | 0,3598 | 0,5655     |
| TcCLB.511825.40  | centrin-4, putative (Centrin4)                                | 0,3597 | 0,0008161  |
| TcCLB.511001.30  | hypothetical protein, conserved                               | 0,3596 | 0,004408   |
| TcCLB.509615.4   | hypothetical protein, conserved (pseudogene)                  | 0,3596 | 0,2611     |
| TcCLB.506309.80  | mucin TcMUCII, putative                                       | 0,3596 | 0,6843     |

|                  |                                                             |        |            |
|------------------|-------------------------------------------------------------|--------|------------|
| TcCLB.511717.150 | hypothetical protein, conserved                             | 0,3593 | 0,01118    |
| TcCLB.510077.40  | small GTP-binding protein RAB6, putative                    | 0,3593 | 0,03764    |
| TcCLB.509979.350 | mucin-associated surface protein (MASP), putative           | 0,3593 | 0,1505     |
| TcCLB.506955.70  | mucin-associated surface protein (MASP), putative           | 0,3593 | 0,2368     |
| TcCLB.511159.30  | Present in the outer mitochondrial membrane proteome 1!     | 0,3592 | 0,01317    |
| TcCLB.509767.80  | hypothetical protein, conserved                             | 0,3589 | 0,07332    |
| TcCLB.508141.20  | hypothetical protein, conserved                             | 0,3586 | 0,002187   |
| TcCLB.510359.580 | mucin TcMUCII, putative                                     | 0,3585 | 0,5985     |
| TcCLB.506317.10  | hypothetical protein, conserved                             | 0,3584 | 0,002267   |
| TcCLB.508979.90  | hypothetical protein                                        | 0,3584 | 0,059      |
| TcCLB.511825.260 | ribosomal RNA processing protein 45, putative (RRP45)       | 0,3583 | 0,02396    |
| TcCLB.506173.60  | mucin-associated surface protein (MASP), putative           | 0,3583 | 0,3116     |
| TcCLB.506797.30  | hypothetical protein                                        | 0,3582 | 0,0001967  |
| TcCLB.508433.120 | mucin-associated surface protein (MASP, pseudogene), pu     | 0,3582 | 0,5116     |
| TcCLB.511393.40  | hypothetical protein, conserved                             | 0,3581 | 0,01627    |
| TcCLB.506503.4   | transporter, putative                                       | 0,358  | 0,01076    |
| TcCLB.506329.65  | trans-sialidase (pseudogene), putative                      | 0,3579 | 0,6104     |
| TcCLB.503521.80  | hypothetical protein, conserved                             | 0,3576 | 0,0116     |
| TcCLB.503579.80  | hypothetical protein, conserved                             | 0,3575 | 0,005446   |
| TcCLB.508547.30  | acyl-CoA dehydrogenase, mitochondrial precursor, putative   | 0,3574 | 0,001091   |
| TcCLB.509831.30  | hypothetical protein, conserved                             | 0,3574 | 0,002512   |
| TcCLB.508981.39  | trifunctional enzyme alpha subunit, mitochondrial precursor | 0,3574 | 0,003141   |
| TcCLB.511167.50  | hypothetical protein, conserved                             | 0,3573 | 0,002487   |
| TcCLB.510943.150 | glycerol-3-phosphate acyltransferase, putative              | 0,3572 | 0,007617   |
| TcCLB.508221.941 | surface protease GP63 (pseudogene), putative                | 0,3572 | 0,4685     |
| TcCLB.506755.250 | mitochondrial import inner membrane translocase subunit     | 0,3571 | 0,008517   |
| TcCLB.506529.380 | ser/thr protein phosphatase, putative                       | 0,3567 | 0,00001889 |
| TcCLB.511919.10  | mucin-associated surface protein (MASP), putative           | 0,3565 | 0,1778     |
| TcCLB.508221.830 | hypothetical protein, conserved (pseudogene)                | 0,3562 | 0,4654     |
| TcCLB.509769.134 | hypothetical protein, conserved                             | 0,3561 | 0,002114   |
| TcCLB.510099.60  | hypothetical protein                                        | 0,356  | 0,003365   |
| TcCLB.506805.10  | mucin-associated surface protein (MASP), putative           | 0,3559 | 0,4925     |
| TcCLB.511063.110 | mucin-associated surface protein (MASP, pseudogene), pu     | 0,3558 | 0,5189     |
| TcCLB.448653.10  | trans-sialidase, putative (fragment)                        | 0,3557 | 0,728      |
| TcCLB.504149.140 | hypothetical protein, conserved                             | 0,3556 | 0,0006075  |
| TcCLB.511725.280 | hypothetical protein, conserved                             | 0,3555 | 0,001313   |
| TcCLB.504113.41  | hypothetical protein, conserved (fragment)                  | 0,3555 | 0,3082     |
| TcCLB.510163.20  | elongation factor 1-gamma (EF-1-gamma), putative            | 0,3554 | 0,001786   |
| TcCLB.511921.90  | mucin-associated surface protein (MASP, pseudogene), pu     | 0,355  | 0,3372     |
| TcCLB.506425.150 | hypothetical protein                                        | 0,3548 | 0,1036     |
| TcCLB.508051.10  | hypothetical protein, conserved                             | 0,3547 | 0,003821   |
| TcCLB.508165.380 | hypothetical protein                                        | 0,3547 | 0,5665     |
| TcCLB.510885.160 | hypothetical protein, conserved                             | 0,3543 | 0,00003969 |
| TcCLB.510649.24  | membrane associated protein, putative (fragment)            | 0,3543 | 0,0002357  |
| TcCLB.506163.60  | hypothetical protein                                        | 0,3542 | 0,002327   |

|                  |                                                           |        |            |
|------------------|-----------------------------------------------------------|--------|------------|
| TcCLB.509459.40  | hypothetical protein, conserved                           | 0,3542 | 0,003456   |
| TcCLB.503439.61  | retrotransposon hot spot protein (RHS, pseudogene), putat | 0,3542 | 0,03493    |
| TcCLB.510013.310 | mucin-associated surface protein (MASP), putative         | 0,3542 | 0,2983     |
| TcCLB.509745.20  | glycosyl transferase-like, putative                       | 0,3539 | 0,01517    |
| TcCLB.510359.490 | trans-sialidase (pseudogene), putative                    | 0,3538 | 0,1715     |
| TcCLB.504111.30  | hypothetical protein, conserved                           | 0,3537 | 0,007352   |
| TcCLB.503603.10  | mitochondrial RNA binding complex 1 subunit, putative     | 0,3536 | 0,02081    |
| TcCLB.506469.100 | hypothetical protein, conserved                           | 0,3535 | 0,0003424  |
| TcCLB.508119.11  | surface protease GP63 (pseudogene), putative              | 0,3535 | 0,1352     |
| TcCLB.504019.6   | hypothetical protein                                      | 0,3534 | 0,0005203  |
| TcCLB.504223.20  | amino acid permease, putative                             | 0,3533 | 0,2031     |
| TcCLB.505183.110 | hypothetical protein                                      | 0,3533 | 0,2244     |
| TcCLB.510287.4   | Mutt-Nudix-related hydrolase, putative (fragment)         | 0,3532 | 0,4612     |
| TcCLB.505071.90  | protein phosphatase 2A, regulatory subunit B, putative    | 0,3531 | 0,003309   |
| TcCLB.511283.320 | hypothetical protein, conserved                           | 0,353  | 0,02491    |
| TcCLB.508443.10  | hypothetical protein, conserved                           | 0,3529 | 0,03143    |
| TcCLB.510283.110 | hypothetical protein, conserved                           | 0,3529 | 0,08809    |
| TcCLB.410269.10  | trans-sialidase, putative (fragment)                      | 0,3529 | 0,3573     |
| TcCLB.511237.60  | 40S ribosomal protein S33, putative                       | 0,3528 | 0,0003439  |
| TcCLB.510565.50  | hypothetical protein, conserved                           | 0,3528 | 0,01689    |
| TcCLB.506279.200 | mucin TcMUCII, putative                                   | 0,3527 | 0,5516     |
| TcCLB.506861.10  | ATP-dependent DEAD/H RNA helicase, putative               | 0,3526 | 0,004112   |
| TcCLB.508165.150 | mucin-associated surface protein (MASP), putative         | 0,3526 | 0,3191     |
| TcCLB.510013.240 | mucin TcMUCII, putative                                   | 0,3526 | 0,6586     |
| TcCLB.509289.20  | tuzin, putative                                           | 0,3525 | 2,322E-07  |
| TcCLB.510719.130 | hypothetical protein, conserved                           | 0,3523 | 0,01053    |
| TcCLB.506853.10  | hypothetical protein, conserved                           | 0,3521 | 0,00004778 |
| TcCLB.507521.150 | dispersed gene family protein 1 (DGF-1), putative         | 0,3521 | 0,05022    |
| TcCLB.507641.210 | T-lymphocyte triggering factor, putative                  | 0,352  | 0,0006702  |
| TcCLB.506745.10  | hypothetical protein, conserved                           | 0,352  | 0,0596     |
| TcCLB.503945.30  | hypothetical protein, conserved                           | 0,352  | 0,07913    |
| TcCLB.506133.10  | syntaxin binding protein (pseudogene), putative           | 0,3518 | 0,5426     |
| TcCLB.508511.40  | mucin-associated surface protein (MASP, pseudogene), pu   | 0,3518 | 0,5601     |
| TcCLB.511417.30  | hypothetical protein, conserved                           | 0,3517 | 0,01972    |
| TcCLB.510643.20  | retrotransposon hot spot protein (RHS, pseudogene), putat | 0,3517 | 0,05017    |
| TcCLB.507973.10  | mucin TcMUCl, putative                                    | 0,3517 | 0,4925     |
| TcCLB.504131.70  | hypothetical protein, conserved                           | 0,3516 | 0,00005757 |
| TcCLB.505807.90  | hypothetical protein, conserved                           | 0,3516 | 0,0002379  |
| TcCLB.511217.100 | hypothetical protein, conserved                           | 0,3516 | 0,00167    |
| TcCLB.508779.40  | hypothetical protein, conserved                           | 0,3516 | 0,04305    |
| TcCLB.508515.60  | hypothetical protein, conserved                           | 0,3516 | 0,04953    |
| TcCLB.507047.134 | hypothetical protein, conserved                           | 0,3516 | 0,2741     |
| TcCLB.511647.30  | meiotic recombination protein SPO11, putative             | 0,3515 | 0,1949     |
| TcCLB.511665.21  | trans-sialidase (pseudogene), putative                    | 0,3513 | 0,05529    |
| TcCLB.510943.20  | hypothetical protein                                      | 0,3512 | 0,172      |

|                  |                                                             |        |           |
|------------------|-------------------------------------------------------------|--------|-----------|
| TcCLB.508815.150 | hypothetical protein, conserved                             | 0,3511 | 0,08799   |
| TcCLB.507559.40  | hypothetical protein, conserved                             | 0,351  | 0,01107   |
| TcCLB.511135.10  | hypothetical protein, conserved (pseudogene)                | 0,351  | 0,02742   |
| TcCLB.510503.89  | mucin-associated surface protein (MASP, pseudogene), pu     | 0,3507 | 0,6595    |
| TcCLB.511907.180 | surface protease GP63 (pseudogene), putative                | 0,3503 | 0,2382    |
| TcCLB.508277.130 | hypothetical protein, conserved                             | 0,3502 | 0,08537   |
| TcCLB.511825.10  | hypothetical protein, conserved                             | 0,3501 | 0,007577  |
| TcCLB.511907.340 | hypothetical protein, conserved                             | 0,35   | 0,1414    |
| TcCLB.511767.130 | expression site-associated gene (ESAG-like) protein, putati | 0,35   | 0,4174    |
| TcCLB.510879.110 | ribosomal protein L3, putative                              | 0,3499 | 0,000171  |
| TcCLB.507623.20  | hypothetical protein, conserved                             | 0,3498 | 0,004943  |
| TcCLB.511459.40  | hypothetical protein, conserved                             | 0,3498 | 0,007773  |
| TcCLB.506705.30  | hypothetical protein, conserved                             | 0,3498 | 0,07317   |
| TcCLB.511611.20  | mucin-associated surface protein (MASP), putative           | 0,3498 | 0,6538    |
| TcCLB.510021.120 | trans-sialidase, Group V, putative                          | 0,3497 | 0,3237    |
| TcCLB.507689.25  | hypothetical protein, conserved                             | 0,3496 | 0,4267    |
| TcCLB.509233.190 | ribosomal protein S25, putative                             | 0,3494 | 8,624E-06 |
| TcCLB.505987.10  | hypothetical protein, conserved (pseudogene)                | 0,3494 | 0,03782   |
| TcCLB.503561.10  | hypothetical protein, conserved                             | 0,3494 | 0,03996   |
| TcCLB.511603.40  | hypothetical protein                                        | 0,3494 | 0,5373    |
| TcCLB.439803.9   | trans-sialidase (pseudogene), putative                      | 0,3493 | 0,1771    |
| TcCLB.509859.60  | hypothetical protein, conserved                             | 0,3491 | 0,001714  |
| TcCLB.511283.100 | hypothetical protein, conserved                             | 0,3491 | 0,008043  |
| TcCLB.505297.80  | trans-sialidase (pseudogene), putative                      | 0,3491 | 0,09488   |
| TcCLB.511367.230 | NADPH:adrenodoxin oxidoreductase, mitochondrial, putativ    | 0,3489 | 0,003341  |
| TcCLB.510193.10  | mucin-associated surface protein (MASP), putative           | 0,3488 | 0,3513    |
| TcCLB.503593.50  | hypothetical protein, conserved                             | 0,3484 | 0,0005594 |
| TcCLB.506223.30  | hypothetical protein, conserved                             | 0,3483 | 0,02294   |
| TcCLB.510713.130 | mucin-associated surface protein (MASP), putative           | 0,3483 | 0,4502    |
| TcCLB.506667.20  | hypothetical protein                                        | 0,3481 | 0,5667    |
| TcCLB.509733.180 | adenylate kinase, putative                                  | 0,348  | 0,1844    |
| TcCLB.511835.10  | trans-sialidase, Group VIII, putative                       | 0,3476 | 0,3139    |
| TcCLB.508819.10  | hypothetical protein, conserved                             | 0,3475 | 0,0356    |
| TcCLB.503503.40  | mucin-associated surface protein (MASP), putative           | 0,3475 | 0,4681    |
| TcCLB.506559.205 | hypothetical protein                                        | 0,3474 | 0,08132   |
| TcCLB.508221.894 | mucin-associated surface protein (MASP), putative           | 0,3473 | 0,4828    |
| TcCLB.510091.119 | calpain-like cysteine peptidase (pseudogene), putative      | 0,3472 | 0,0427    |
| TcCLB.506819.20  | hypothetical protein                                        | 0,3471 | 0,06963   |
| TcCLB.506835.20  | hypothetical protein                                        | 0,347  | 0,003139  |
| TcCLB.503911.30  | hypothetical protein, conserved                             | 0,3469 | 0,001447  |
| TcCLB.508823.120 | ribosomal protein S20, putative                             | 0,3469 | 0,001675  |
| TcCLB.511765.20  | dispersed gene family protein 1 (DGF-1), putative           | 0,3469 | 0,1098    |
| TcCLB.511843.70  | trans-sialidase, Group V, putative                          | 0,3469 | 0,3683    |
| TcCLB.507023.130 | hypothetical protein, conserved                             | 0,3468 | 0,02952   |
| TcCLB.509611.170 | hypothetical protein, conserved                             | 0,3467 | 0,009707  |

|                  |                                                            |        |            |
|------------------|------------------------------------------------------------|--------|------------|
| TcCLB.511595.59  | trans-sialidase, putative (fragment)                       | 0,3466 | 0,7486     |
| TcCLB.508041.60  | eukaryotic release factor 3, putative                      | 0,3465 | 0,00006332 |
| TcCLB.509915.10  | trans-sialidase (pseudogene), putative                     | 0,3465 | 0,3189     |
| TcCLB.508153.760 | hypothetical protein, conserved                            | 0,3464 | 0,003751   |
| TcCLB.509967.80  | hypothetical protein, conserved                            | 0,3464 | 0,03229    |
| TcCLB.509767.70  | V-type proton ATPase subunit a, putative (VAa)             | 0,3463 | 0,0007576  |
| TcCLB.505183.100 | hypothetical protein, conserved                            | 0,3463 | 0,01446    |
| TcCLB.510719.110 | actin-like protein, putative                               | 0,3462 | 0,03135    |
| TcCLB.509643.100 | hypothetical protein, conserved                            | 0,3461 | 0,04938    |
| TcCLB.503587.3   | mucin TcMUC (pseudogene), putative                         | 0,3461 | 0,6547     |
| TcCLB.511839.40  | trans-sialidase, Group V, putative                         | 0,346  | 0,3478     |
| TcCLB.508881.120 | prefoldin, putative                                        | 0,3455 | 0,004122   |
| TcCLB.505807.250 | hypothetical protein, conserved                            | 0,3455 | 0,04059    |
| TcCLB.506289.180 | mucin-associated surface protein (MASP, pseudogene), pu    | 0,3454 | 0,3971     |
| TcCLB.510101.130 | inositol-1,4,5-trisphosphate (IP3) 5-phosphatase, putative | 0,3453 | 0,0008986  |
| TcCLB.508817.110 | hypothetical protein, conserved                            | 0,3453 | 0,06328    |
| TcCLB.506615.21  | surface protease GP63 (pseudogene), putative               | 0,3453 | 0,5124     |
| TcCLB.508319.60  | hypothetical protein, conserved                            | 0,3452 | 0,003253   |
| TcCLB.510363.30  | retrotransposon hot spot protein (RHS, pseudogene), putat  | 0,3452 | 0,4366     |
| TcCLB.479253.9   | hypothetical protein, conserved (fragment)                 | 0,3451 | 0,1044     |
| TcCLB.507951.100 | hypothetical protein, conserved                            | 0,345  | 0,00762    |
| TcCLB.508153.260 | hypothetical protein, conserved                            | 0,345  | 0,07635    |
| TcCLB.506625.100 | hypothetical protein, conserved                            | 0,3448 | 0,001714   |
| TcCLB.504193.30  | retrotransposon hot spot protein (RHS, pseudogene), putat  | 0,3448 | 0,004901   |
| TcCLB.506965.180 | mucin-associated surface protein (MASP), putative          | 0,3447 | 0,6962     |
| TcCLB.506835.50  | hypothetical protein                                       | 0,3445 | 0,002309   |
| TcCLB.510337.11  | hypothetical protein, conserved (fragment)                 | 0,3445 | 0,009665   |
| TcCLB.504411.40  | hypothetical protein, conserved                            | 0,3445 | 0,02234    |
| TcCLB.508805.120 | UDP-Gal or UDP-GlcNAc-dependent glycosyltransferase, pu    | 0,3445 | 0,2601     |
| TcCLB.506825.60  | hypothetical protein, conserved                            | 0,3442 | 0,0005653  |
| TcCLB.507089.200 | chloride channel protein, putative                         | 0,3442 | 0,001057   |
| TcCLB.508355.200 | vacuolar protein sorting protein 16, putative              | 0,3441 | 0,0002172  |
| TcCLB.506563.190 | calpain-like cysteine peptidase, putative                  | 0,3441 | 0,0008341  |
| TcCLB.508175.290 | hypothetical protein, conserved                            | 0,3441 | 0,003013   |
| TcCLB.509399.9   | helicase, putative                                         | 0,3439 | 0,00331    |
| TcCLB.506327.40  | hypothetical protein, conserved                            | 0,3438 | 0,0001343  |
| TcCLB.510887.14  | chaperone DNAJ protein, putative                           | 0,3437 | 0,01616    |
| TcCLB.506963.90  | calmodulin, putative                                       | 0,3435 | 0,02031    |
| TcCLB.511089.30  | mucin-associated surface protein (MASP), putative          | 0,3434 | 0,5264     |
| TcCLB.507957.100 | mucin-associated surface protein (MASP, pseudogene), pu    | 0,3433 | 0,3917     |
| TcCLB.511755.40  | hypothetical protein, conserved                            | 0,3429 | 0,06052    |
| TcCLB.510525.70  | hypothetical protein, conserved                            | 0,3428 | 0,02498    |
| TcCLB.510859.10  | nucleolar RNA-binding protein, putative                    | 0,3427 | 0,00003942 |
| TcCLB.508577.50  | hypothetical protein                                       | 0,3427 | 0,1293     |
| TcCLB.511089.130 | mucin-associated surface protein (MASP), putative          | 0,3426 | 0,5997     |



|                  |                                                           |        |            |
|------------------|-----------------------------------------------------------|--------|------------|
| TcCLB.509735.120 | retrotransposon hot spot (RHS) protein, putative          | 0,3425 | 0,003596   |
| TcCLB.507295.50  | mucin-associated surface protein (MASP), putative         | 0,3425 | 0,2301     |
| TcCLB.506345.90  | trans-sialidase, Group II, putative                       | 0,3424 | 0,2014     |
| TcCLB.506227.190 | hypothetical protein                                      | 0,3424 | 0,2586     |
| TcCLB.506113.80  | hypothetical protein, conserved (pseudogene)              | 0,3423 | 0,01767    |
| TcCLB.506179.20  | hypothetical protein, conserved                           | 0,3423 | 0,05443    |
| TcCLB.511853.21  | mucin-associated surface protein (MASP, pseudogene), pu   | 0,3423 | 0,3444     |
| TcCLB.508963.10  | Flagellar Member 3 (pseudogene)                           | 0,3422 | 0,0009431  |
| TcCLB.508313.30  | mucin-associated surface protein (MASP), putative         | 0,3422 | 0,5737     |
| TcCLB.506267.90  | mucin-associated surface protein (MASP), putative         | 0,3421 | 0,2712     |
| TcCLB.511685.50  | hypothetical protein, conserved                           | 0,342  | 0,1044     |
| TcCLB.511665.100 | retrotransposon hot spot protein (RHS, pseudogene), putat | 0,342  | 0,1321     |
| TcCLB.510241.60  | nascent polypeptide associated complex subunit, putative  | 0,3418 | 2,658E-06  |
| TcCLB.510275.120 | hypothetical protein                                      | 0,3417 | 0,6191     |
| TcCLB.508529.30  | retrotransposon hot spot protein (RHS, pseudogene), putat | 0,3416 | 0,003754   |
| TcCLB.506513.60  | ADP-ribosylation factor, putative (ARL-1)                 | 0,3416 | 0,04168    |
| TcCLB.511105.60  | trans-sialidase, putative                                 | 0,3415 | 0,1198     |
| TcCLB.506399.89  | Succinate dehydrogenase [ubiquinone] flavoprotein subuni  | 0,3414 | 0,02427    |
| TcCLB.506537.100 | trans-sialidase (pseudogene), putative                    | 0,3412 | 0,0314     |
| TcCLB.508823.40  | hypothetical protein, conserved                           | 0,3412 | 0,07643    |
| TcCLB.506801.10  | surface protease GP63 (pseudogene), putative              | 0,3412 | 0,4699     |
| TcCLB.511825.170 | serine/threonine protein phosphatase, putative            | 0,3409 | 0,01632    |
| TcCLB.506789.210 | paraflagellar rod protein, putative                       | 0,3407 | 0,003995   |
| TcCLB.509925.50  | retrotransposon hot spot protein (RHS, pseudogene), putat | 0,3407 | 0,1714     |
| TcCLB.505655.10  | trans-sialidase (pseudogene), putative                    | 0,3403 | 0,3469     |
| TcCLB.509769.120 | hypothetical protein, conserved                           | 0,3402 | 0,00013    |
| TcCLB.506529.110 | hypothetical protein, conserved                           | 0,3401 | 0,02906    |
| TcCLB.507085.120 | hypothetical protein                                      | 0,3401 | 0,6064     |
| TcCLB.506409.30  | mucin-associated surface protein (MASP), putative         | 0,3399 | 0,4313     |
| TcCLB.504039.90  | mucin-associated surface protein (MASP, pseudogene), pu   | 0,3395 | 0,5231     |
| TcCLB.507509.40  | hypothetical protein, conserved                           | 0,3394 | 0,001833   |
| TcCLB.511153.84  | hypothetical protein, conserved                           | 0,3394 | 0,03543    |
| TcCLB.504443.20  | hypothetical protein, conserved                           | 0,3394 | 0,05662    |
| TcCLB.506489.20  | monoglyceride lipase, putative                            | 0,3391 | 0,00005073 |
| TcCLB.504103.6   | hypothetical protein, conserved                           | 0,3391 | 0,1035     |
| TcCLB.508175.329 | 60S ribosomal protein L19, putative                       | 0,3389 | 0,001266   |
| TcCLB.506519.140 | hypothetical protein, conserved (pseudogene)              | 0,3389 | 0,04828    |
| TcCLB.511717.200 | hypothetical protein, conserved                           | 0,3388 | 0,01153    |
| TcCLB.507875.90  | dispersed gene family protein 1 (DGF-1, pseudogene), puta | 0,3386 | 0,06787    |
| TcCLB.507993.100 | hypothetical protein, conserved                           | 0,3386 | 0,1416     |
| TcCLB.504049.20  | retrotransposon hot spot protein (RHS, pseudogene), putat | 0,3384 | 0,003323   |
| TcCLB.509023.40  | hypothetical protein, conserved                           | 0,3382 | 0,02332    |
| TcCLB.507257.90  | hypothetical protein, conserved                           | 0,3382 | 0,06683    |
| TcCLB.506947.110 | myosin heavy chain (pseudogene), putative                 | 0,3381 | 0,003639   |
| TcCLB.508521.100 | trans-sialidase, Group VIII, putative                     | 0,338  | 0,4801     |

|                  |                                                               |        |            |
|------------------|---------------------------------------------------------------|--------|------------|
| TcCLB.506295.70  | hypothetical protein, conserved                               | 0,3379 | 0,002153   |
| TcCLB.510303.170 | hypothetical protein, conserved                               | 0,3378 | 0,00008018 |
| TcCLB.503639.20  | hypothetical protein, conserved                               | 0,3374 | 0,1271     |
| TcCLB.511559.40  | hypothetical protein, conserved                               | 0,3373 | 0,01529    |
| TcCLB.503887.60  | glycerolphosphate mutase, putative                            | 0,3373 | 0,01654    |
| TcCLB.510339.60  | hypothetical protein, conserved                               | 0,3373 | 0,0248     |
| TcCLB.511717.170 | Metalloprotease M41 FtsH, putative                            | 0,3372 | 0,00501    |
| TcCLB.506529.320 | hypothetical protein, conserved                               | 0,3372 | 0,01317    |
| TcCLB.506557.10  | hypothetical protein, conserved                               | 0,3371 | 0,02572    |
| TcCLB.509893.20  | hypothetical protein, conserved                               | 0,3369 | 0,001516   |
| TcCLB.508661.34  | hypothetical protein, conserved                               | 0,3368 | 0,01256    |
| TcCLB.510163.30  | mucin-associated surface protein (MASP), putative             | 0,3366 | 0,01044    |
| TcCLB.511929.20  | dispersed gene family protein 1 (DGF-1, pseudogene), putative | 0,3366 | 0,1288     |
| TcCLB.510715.40  | mucin-associated surface protein (MASP), putative             | 0,3366 | 0,5727     |
| TcCLB.510311.80  | hypothetical protein, conserved                               | 0,3365 | 0,007741   |
| TcCLB.506907.14  | hypothetical protein, conserved                               | 0,3365 | 0,01753    |
| TcCLB.509373.10  | trans-sialidase (pseudogene), putative                        | 0,3365 | 0,2829     |
| TcCLB.508479.274 | hypothetical protein, conserved                               | 0,3364 | 0,002586   |
| TcCLB.503579.140 | hypothetical protein, conserved                               | 0,3364 | 0,009847   |
| TcCLB.507437.30  | trans-sialidase (pseudogene), putative                        | 0,3364 | 0,2271     |
| TcCLB.510261.41  | mucin TcMUC (pseudogene), putative                            | 0,3364 | 0,7031     |
| TcCLB.511577.44  | hypothetical protein, conserved                               | 0,3363 | 0,1656     |
| TcCLB.509057.10  | hypothetical protein, conserved                               | 0,3361 | 0,1931     |
| TcCLB.511153.110 | hypothetical protein, conserved                               | 0,3359 | 0,0007017  |
| TcCLB.503453.70  | hypothetical protein, conserved                               | 0,3359 | 0,0009662  |
| TcCLB.511163.10  | seryl-tRNA synthetase, putative (fragment)                    | 0,3358 | 0,0009898  |
| TcCLB.511875.64  | hypothetical protein, conserved (pseudogene)                  | 0,3358 | 0,169      |
| TcCLB.511127.340 | tyrosine phosphatase, putative                                | 0,3357 | 0,002449   |
| TcCLB.509791.20  | hypothetical protein, conserved                               | 0,3357 | 0,01152    |
| TcCLB.508089.50  | hypothetical protein, conserved                               | 0,3356 | 0,0147     |
| TcCLB.507699.200 | mucin TcMUCII, putative                                       | 0,3356 | 0,4935     |
| TcCLB.511323.10  | trans-sialidase, Group I, putative                            | 0,3353 | 0,04953    |
| TcCLB.506147.210 | hypothetical protein, conserved                               | 0,3353 | 0,06619    |
| TcCLB.503833.40  | 40S ribosomal protein S2, putative                            | 0,3352 | 0,0001719  |
| TcCLB.506743.180 | recombination initiation protein NBS1, putative               | 0,335  | 0,001419   |
| TcCLB.510979.10  | mucin-associated surface protein (MASP), putative             | 0,335  | 0,3315     |
| TcCLB.506331.200 | trans-sialidase (pseudogene), putative                        | 0,335  | 0,4223     |
| TcCLB.509541.10  | hypothetical protein, conserved                               | 0,3349 | 0,00161    |
| TcCLB.506637.10  | hypothetical protein, conserved                               | 0,3348 | 0,004454   |
| TcCLB.511401.30  | trans-sialidase, Group V, putative                            | 0,3347 | 0,1713     |
| TcCLB.511067.20  | 60S ribosomal protein L26, putative                           | 0,3345 | 0,00004759 |
| TcCLB.506795.70  | hypothetical protein, conserved                               | 0,3344 | 0,118      |
| TcCLB.506153.6   | hypothetical protein, conserved                               | 0,3342 | 0,06028    |
| TcCLB.459061.10  | trans-sialidase, putative                                     | 0,3342 | 0,3282     |
| TcCLB.503909.76  | ferric reductase transmembrane protein, putative              | 0,3342 | 0,3484     |

|                  |                                                             |        |           |
|------------------|-------------------------------------------------------------|--------|-----------|
| TcCLB.510375.40  | mucin-associated surface protein (MASP), putative           | 0,3342 | 0,6619    |
| TcCLB.510543.110 | hypothetical protein, conserved (pseudogene)                | 0,3341 | 0,1962    |
| TcCLB.509695.50  | katanin, putative                                           | 0,3339 | 0,1986    |
| TcCLB.511521.24  | hypothetical protein, conserved                             | 0,3339 | 0,3261    |
| TcCLB.509717.90  | short chain 3-hydroxyacyl-CoA dehydrogenase, putative       | 0,3337 | 0,0003536 |
| TcCLB.510901.70  | mitochondrial RNA binding complex 1 subunit, putative       | 0,3337 | 0,001759  |
| TcCLB.511647.4   | glutamine-dependent carbamoyl-phosphate synthetase, pu      | 0,3337 | 0,005619  |
| TcCLB.511315.30  | hypothetical protein, conserved                             | 0,3337 | 0,1043    |
| TcCLB.506811.140 | hypothetical protein, conserved                             | 0,3336 | 0,01406   |
| TcCLB.503757.10  | 40S ribosomal protein SA, putative                          | 0,3332 | 0,0009996 |
| TcCLB.506821.60  | mucin TcMUCI, putative                                      | 0,3332 | 0,3678    |
| TcCLB.504081.400 | mucin-associated surface protein (MASP), putative           | 0,3332 | 0,4647    |
| TcCLB.510531.40  | hypothetical protein, conserved                             | 0,3329 | 0,002961  |
| TcCLB.511529.90  | enolase, putative                                           | 0,3328 | 0,04498   |
| TcCLB.505297.60  | mucin-associated surface protein (MASP), putative           | 0,3327 | 0,2351    |
| TcCLB.507765.70  | 40S ribosomal protein S21, putative                         | 0,3325 | 4,408E-07 |
| TcCLB.510897.70  | glycerophosphoryl diester phosphodiesterase (pseudogene)    | 0,3325 | 0,04108   |
| TcCLB.511673.9   | hypothetical protein, conserved                             | 0,3325 | 0,2434    |
| TcCLB.510013.110 | mucin TcMUCII, putative                                     | 0,3325 | 0,7023    |
| TcCLB.511529.150 | hypothetical protein, conserved                             | 0,3324 | 0,006167  |
| TcCLB.506705.10  | hypothetical protein                                        | 0,3324 | 0,02957   |
| TcCLB.506761.47  | mucin TcMUCII, putative                                     | 0,3323 | 0,6967    |
| TcCLB.506201.39  | 25 kDa translation elongation factor 1-beta, putative (EF-1 | 0,3322 | 6,865E-06 |
| TcCLB.508641.330 | pre-mRNA splicing factor, putative                          | 0,3322 | 0,2127    |
| TcCLB.510031.20  | NADH-ubiquinone oxidoreductase complex I subunit, putati    | 0,3321 | 0,07958   |
| TcCLB.506695.7   | hypothetical protein, conserved                             | 0,3321 | 0,08472   |
| TcCLB.511183.49  | mucin TcMUCII (pseudogene), putative                        | 0,3319 | 0,6405    |
| TcCLB.510805.5   | trans-sialidase, putative                                   | 0,3318 | 0,6484    |
| TcCLB.509545.10  | mucin-associated surface protein (MASP), putative           | 0,3317 | 0,2708    |
| TcCLB.506953.30  | protein kinase, putative                                    | 0,3314 | 0,05787   |
| TcCLB.416809.10  | dispersed gene family protein 1 (DGF-1), putative           | 0,3313 | 0,08619   |
| TcCLB.511751.80  | hypothetical protein                                        | 0,3312 | 0,01901   |
| TcCLB.506941.50  | hypothetical protein, conserved                             | 0,331  | 0,009319  |
| TcCLB.507009.90  | iron-sulfur cluster assembly protein, putative              | 0,331  | 0,02103   |
| TcCLB.511499.30  | RNA decapping enzyme, putative (Dcp2)                       | 0,331  | 0,1087    |
| TcCLB.504147.190 | hypothetical protein, conserved                             | 0,3309 | 0,002367  |
| TcCLB.511367.290 | hypothetical protein, conserved                             | 0,3309 | 0,002731  |
| TcCLB.505941.20  | surface protease GP63 (pseudogene), putative                | 0,3309 | 0,2586    |
| TcCLB.506839.80  | phosphoribosylpyrophosphate synthetase, putative            | 0,3308 | 0,0001774 |
| TcCLB.508433.180 | mucin-associated surface protein (MASP), putative           | 0,3308 | 0,3172    |
| TcCLB.510465.150 | dispersed gene family protein 1 (DGF-1), putative           | 0,3307 | 0,443     |
| TcCLB.511809.70  | DNA primase small subunit, putative                         | 0,3306 | 0,04004   |
| TcCLB.511709.19  | phosphatidylinositol 3-kinase catalytic subunit, putative   | 0,3306 | 0,09648   |
| TcCLB.508055.25  | hypothetical protein                                        | 0,3304 | 0,5263    |
| TcCLB.508425.20  | tryptophanyl-tRNA synthetase (pseudogene), putative         | 0,3303 | 0,1326    |

|                  |                                                              |        |           |
|------------------|--------------------------------------------------------------|--------|-----------|
| TcCLB.511649.60  | COP9 signalosome complex subunit 5, putative                 | 0,3302 | 0,004972  |
| TcCLB.510361.180 | trans-sialidase (pseudogene), putative                       | 0,3302 | 0,571     |
| TcCLB.511745.10  | heat shock 70 kDa protein, mitochondrial precursor, putative | 0,33   | 0,001145  |
| TcCLB.506245.302 | mucin-associated surface protein (MASP), putative            | 0,3299 | 0,3797    |
| TcCLB.503835.39  | hypothetical protein, conserved                              | 0,3298 | 0,01714   |
| TcCLB.511291.20  | hypothetical protein, conserved                              | 0,3298 | 0,0478    |
| TcCLB.511751.114 | hypothetical protein, conserved                              | 0,3298 | 0,1832    |
| TcCLB.507121.40  | beta galactofuranosyl glycosyltransferase, putative          | 0,3298 | 0,2565    |
| TcCLB.506767.196 | surface protease GP63 (pseudogene), putative                 | 0,3298 | 0,6867    |
| TcCLB.503719.20  | 40S ribosomal protein SA, putative                           | 0,3297 | 0,0002357 |
| TcCLB.510191.31  | trans-sialidase (pseudogene), putative                       | 0,3297 | 0,5878    |
| TcCLB.509693.50  | metallo-peptidase, Clan MG, Family M24 (MetAP2)              | 0,3293 | 0,001462  |
| TcCLB.508299.60  | 60S ribosomal protein L2, putative                           | 0,3291 | 7,671E-06 |
| TcCLB.508387.130 | ATPase, putative                                             | 0,3291 | 0,02741   |
| TcCLB.510101.460 | hypothetical protein, conserved                              | 0,329  | 0,009571  |
| TcCLB.507699.210 | hypothetical protein                                         | 0,329  | 0,4855    |
| TcCLB.511239.120 | hypothetical protein, conserved                              | 0,3289 | 0,1554    |
| TcCLB.510761.10  | mismatch repair protein PMS1, putative                       | 0,3288 | 0,0004863 |
| TcCLB.504151.30  | hypothetical protein, conserved                              | 0,3288 | 0,05796   |
| TcCLB.507203.9   | dispersed gene family protein 1 (DGF-1), putative            | 0,3288 | 0,3539    |
| TcCLB.508027.30  | hypothetical protein, conserved                              | 0,3287 | 0,06671   |
| TcCLB.507081.130 | 2,4-dihydroxyhept-2-ene-1,7-dioic acid aldolase, putative    | 0,3286 | 0,007406  |
| TcCLB.511859.70  | hypothetical protein, conserved                              | 0,3285 | 0,04318   |
| TcCLB.510101.310 | hypothetical protein                                         | 0,3284 | 0,001993  |
| TcCLB.508153.790 | hypothetical protein, conserved                              | 0,3284 | 0,08984   |
| TcCLB.508027.90  | hypothetical protein, conserved                              | 0,3283 | 0,008551  |
| TcCLB.503545.20  | retrotransposon hot spot protein (RHS, pseudogene), putative | 0,3282 | 0,1816    |
| TcCLB.511319.20  | hypothetical protein, conserved                              | 0,3281 | 0,001189  |
| TcCLB.507491.119 | hypothetical protein, conserved                              | 0,3281 | 0,004375  |
| TcCLB.511827.60  | CCR4 associated factor, putative                             | 0,3279 | 0,001645  |
| TcCLB.508989.50  | hypothetical protein, conserved                              | 0,3277 | 0,004017  |
| TcCLB.509073.110 | hypothetical protein, conserved                              | 0,3275 | 0,001599  |
| TcCLB.506605.180 | hypothetical protein, conserved                              | 0,3275 | 0,02541   |
| TcCLB.507485.120 | tuzin                                                        | 0,3275 | 0,1554    |
| TcCLB.508175.50  | hypothetical protein, conserved                              | 0,3274 | 0,001697  |
| TcCLB.511903.90  | hypothetical protein, conserved                              | 0,3273 | 0,01302   |
| TcCLB.506951.70  | surface protease GP63 (pseudogene), putative                 | 0,3273 | 0,4106    |
| TcCLB.453995.10  | retrotransposon hot spot protein (RHS, pseudogene), putative | 0,3272 | 0,03608   |
| TcCLB.505997.60  | retrotransposon hot spot (RHS) protein, putative             | 0,3272 | 0,1303    |
| TcCLB.510943.40  | protein kinase, putative                                     | 0,3271 | 0,004082  |
| TcCLB.510125.10  | pumilio/PUF RNA binding protein 6, putative (PUF6)           | 0,3265 | 0,01607   |
| TcCLB.510437.30  | hypothetical protein, conserved                              | 0,3264 | 0,2494    |
| TcCLB.505155.10  | retrotransposon hot spot protein (RHS, pseudogene), putative | 0,3263 | 0,0922    |
| TcCLB.511169.10  | hypothetical protein, conserved                              | 0,3263 | 0,1112    |
| TcCLB.511277.554 | hypothetical protein, conserved                              | 0,3261 | 0,05942   |

|                  |                                                           |        |            |
|------------------|-----------------------------------------------------------|--------|------------|
| TcCLB.503721.39  | heat shock 70 kDa protein, putative                       | 0,326  | 0,003264   |
| TcCLB.506885.354 | hypothetical protein, conserved                           | 0,3258 | 0,1837     |
| TcCLB.508883.30  | mucin TcMUCII, putative                                   | 0,3256 | 0,5952     |
| TcCLB.508737.170 | hypothetical protein, conserved                           | 0,3255 | 0,04193    |
| TcCLB.503761.20  | surface protease GP63 (pseudogene), putative              | 0,3255 | 0,3942     |
| TcCLB.506957.120 | hypothetical protein, conserved                           | 0,3253 | 0,0005901  |
| TcCLB.506277.30  | mucin-associated surface protein (MASP, pseudogene), pu   | 0,3253 | 0,3122     |
| TcCLB.509429.190 | hypothetical protein, conserved                           | 0,3252 | 0,002599   |
| TcCLB.510525.50  | hypothetical protein, conserved                           | 0,3252 | 0,006763   |
| TcCLB.507993.80  | glycogen synthase kinase 3, putative                      | 0,3252 | 0,1313     |
| TcCLB.508387.60  | hypothetical protein, conserved                           | 0,3251 | 0,06608    |
| TcCLB.510889.80  | protein phosphatase with EF-Hand domains (PPEF)           | 0,325  | 0,0001932  |
| TcCLB.503787.30  | hypothetical protein                                      | 0,325  | 0,4138     |
| TcCLB.509805.120 | hypothetical protein, conserved                           | 0,3249 | 0,119      |
| TcCLB.503509.10  | hypothetical protein, conserved                           | 0,3245 | 0,0000801  |
| TcCLB.506617.5   | surface protein TolT, putative (fragment)                 | 0,3243 | 0,06175    |
| TcCLB.508387.100 | ubiquitin-conjugating enzyme E2, putative                 | 0,3242 | 0,02364    |
| TcCLB.503849.51  | mucin TcMUCII (pseudogene), putative                      | 0,3242 | 0,5064     |
| TcCLB.511871.100 | hypothetical protein, conserved                           | 0,324  | 0,01679    |
| TcCLB.507949.260 | Cell cycle checkpoint protein RAD1-like, putative         | 0,3239 | 0,1717     |
| TcCLB.510579.110 | hypothetical protein, conserved                           | 0,3238 | 0,0006744  |
| TcCLB.507723.160 | hypothetical protein, conserved                           | 0,3238 | 0,003775   |
| TcCLB.511195.10  | retrotransposon hot spot protein (RHS, pseudogene), putat | 0,3238 | 0,4916     |
| TcCLB.510083.30  | retrotransposon hot spot protein (RHS, pseudogene), putat | 0,3237 | 0,002822   |
| TcCLB.510835.40  | 60S ribosomal protein L7a, putative                       | 0,3236 | 0,00002027 |
| TcCLB.511465.20  | hypothetical protein, conserved                           | 0,3236 | 0,004847   |
| TcCLB.510087.30  | dihydroceramide synthase, putative (DHCS)                 | 0,3234 | 0,008702   |
| TcCLB.506777.70  | cdc2-related kinase 8, putative (CRK8)                    | 0,3232 | 0,0104     |
| TcCLB.507013.20  | hypothetical protein, conserved                           | 0,323  | 0,0172     |
| TcCLB.509003.20  | calpain-like cysteine peptidase, putative                 | 0,323  | 0,1298     |
| TcCLB.507957.10  | mucin-associated surface protein (MASP), putative         | 0,3227 | 0,2701     |
| TcCLB.503571.19  | hypothetical protein, conserved                           | 0,3226 | 0,00623    |
| TcCLB.509913.24  | dynein light chain 2B, cytoplasmic, putative              | 0,3226 | 0,02952    |
| TcCLB.506657.79  | 50S ribosomal protein L16, putative                       | 0,3226 | 0,04661    |
| TcCLB.511643.110 | trans-sialidase, Group V, putative                        | 0,3225 | 0,1503     |
| TcCLB.510187.300 | hypothetical protein, conserved                           | 0,3223 | 0,04064    |
| TcCLB.511705.5   | trans-sialidase (pseudogene), putative                    | 0,3223 | 0,5489     |
| TcCLB.511469.20  | hypothetical protein, conserved                           | 0,3222 | 0,003645   |
| TcCLB.511413.19  | trans-sialidase, putative                                 | 0,3218 | 0,2652     |
| TcCLB.506859.20  | proteasome regulatory ATPase subunit 5, putative          | 0,3217 | 0,002242   |
| TcCLB.509047.60  | hypothetical protein, conserved                           | 0,3217 | 0,008191   |
| TcCLB.506529.224 | hypothetical protein, conserved                           | 0,3215 | 0,0867     |
| TcCLB.506559.500 | hypothetical protein, conserved                           | 0,3214 | 0,003473   |
| TcCLB.507921.9   | dispersed gene family protein 1 (DGF-1), putative         | 0,3213 | 0,2049     |
| TcCLB.510621.49  | mucin-associated surface protein (MASP), putative         | 0,3212 | 0,6225     |

|                  |                                                         |        |            |
|------------------|---------------------------------------------------------|--------|------------|
| TcCLB.510899.50  | palmitoyl acyltransferase 4, putative                   | 0,3211 | 0,02397    |
| TcCLB.508707.120 | hypothetical protein, conserved                         | 0,321  | 0,005378   |
| TcCLB.511199.20  | hypothetical protein, conserved                         | 0,321  | 0,0197     |
| TcCLB.504149.50  | hypothetical protein, conserved                         | 0,3209 | 0,003943   |
| TcCLB.507669.120 | ATPase domain protein, putative                         | 0,3208 | 0,03613    |
| TcCLB.507165.59  | hypothetical protein, conserved                         | 0,3207 | 0,02227    |
| TcCLB.510519.140 | hypothetical protein, conserved                         | 0,3207 | 0,1684     |
| TcCLB.508579.4   | hypothetical protein, conserved                         | 0,3206 | 0,1689     |
| TcCLB.507883.10  | glucose-6-phosphate 1-dehydrogenase (pseudogene), puta  | 0,3205 | 0,2157     |
| TcCLB.506975.34  | aminoacylase, putative                                  | 0,3204 | 0,267      |
| TcCLB.510737.10  | 6-phosphogluconate dehydrogenase, decarboxylating, puta | 0,3203 | 0,09842    |
| TcCLB.510429.59  | hypothetical protein, conserved                         | 0,3203 | 0,2545     |
| TcCLB.509151.80  | hypothetical protein, conserved                         | 0,32   | 0,07517    |
| TcCLB.508411.30  | hypothetical protein, conserved                         | 0,3199 | 0,002514   |
| TcCLB.506279.120 | mucin TcMUCII, putative                                 | 0,3199 | 0,6474     |
| TcCLB.506821.150 | hypothetical protein, conserved                         | 0,3194 | 0,0165     |
| TcCLB.506485.20  | hypothetical protein, conserved                         | 0,3194 | 0,03872    |
| TcCLB.507857.30  | hypothetical protein, conserved                         | 0,3193 | 0,007738   |
| TcCLB.509803.10  | hypothetical protein                                    | 0,3188 | 0,1916     |
| TcCLB.510565.125 | hypothetical protein, conserved                         | 0,3188 | 0,236      |
| TcCLB.506637.70  | hypothetical protein, conserved                         | 0,3187 | 0,009702   |
| TcCLB.506931.70  | hypothetical protein, conserved                         | 0,3184 | 0,008387   |
| TcCLB.506977.60  | hypothetical protein, conserved                         | 0,3181 | 0,05749    |
| TcCLB.510143.24  | Hsc70-interacting protein (Hip), putative               | 0,318  | 0,0003169  |
| TcCLB.506599.120 | surface protease GP63 (pseudogene), putative            | 0,3175 | 0,6929     |
| TcCLB.511173.150 | mucin-associated surface protein (MASP), putative       | 0,3173 | 0,4138     |
| TcCLB.509455.30  | hypothetical protein, conserved                         | 0,3172 | 0,02989    |
| TcCLB.510661.100 | hypothetical protein                                    | 0,3172 | 0,04662    |
| TcCLB.510525.20  | hypothetical protein, conserved                         | 0,3172 | 0,06873    |
| TcCLB.506989.270 | hypothetical protein, conserved                         | 0,3171 | 0,6379     |
| TcCLB.508221.350 | hypothetical protein                                    | 0,317  | 0,4314     |
| TcCLB.507517.120 | hypothetical protein, conserved                         | 0,3168 | 0,1004     |
| TcCLB.506297.94  | 60S ribosomal protein L24, putative                     | 0,3167 | 0,01519    |
| TcCLB.506789.140 | MORN repeat-containing protein                          | 0,3166 | 0,02637    |
| TcCLB.511857.20  | hypothetical protein, conserved                         | 0,3165 | 0,009679   |
| TcCLB.503893.70  | reductase, putative                                     | 0,3164 | 0,01912    |
| TcCLB.510121.20  | hexokinase, putative                                    | 0,3163 | 0,0004197  |
| TcCLB.504003.60  | chaperonin/T-complex protein 1 gamma subunit, putative  | 0,316  | 0,00001362 |
| TcCLB.504817.9   | hypothetical protein, conserved (fragment)              | 0,316  | 0,3538     |
| TcCLB.510667.70  | iron-sulfur cluster assembly protein, putative          | 0,3158 | 0,03349    |
| TcCLB.509259.45  | hypothetical protein                                    | 0,3158 | 0,2982     |
| TcCLB.509971.44  | mucin-associated surface protein (MASP, pseudogene), pu | 0,3158 | 0,5953     |
| TcCLB.511657.30  | hypothetical protein, conserved                         | 0,3155 | 0,01173    |
| TcCLB.506929.30  | hypothetical protein, conserved                         | 0,3155 | 0,01666    |
| TcCLB.504103.60  | hypothetical protein, conserved                         | 0,3155 | 0,1332     |

|                   |                                                           |        |            |
|-------------------|-----------------------------------------------------------|--------|------------|
| TcCLB.506943.27   | hypothetical protein, conserved                           | 0,3155 | 0,2186     |
| TcCLB.511875.80   | mucin-associated surface protein (MASP), putative         | 0,3155 | 0,254      |
| TcCLB.505949.70   | mucin TcMUCII, putative                                   | 0,3154 | 0,4177     |
| TcCLB.505949.120  | mucin TcMUCII, putative                                   | 0,3153 | 0,538      |
| TcCLB.511169.29   | tubulin-tyrsoine ligase-like protein, putative            | 0,3149 | 0,002521   |
| TcCLB.503741.20   | mucin-associated surface protein (MASP, pseudogene), pu   | 0,3149 | 0,3033     |
| TcCLB.505807.110  | alkyl-dihydroxyacetone phosphate synthase, putative       | 0,3145 | 0,00006902 |
| TcCLB.511577.86   | N-acetyltransferase, putative                             | 0,3145 | 0,007392   |
| TcCLB.510221.39   | adenosine monophosphate deaminase, putative (fragment     | 0,3145 | 0,0255     |
| TcCLB.508125.149  | trans-sialidase, putative (fragment)                      | 0,3144 | 0,342      |
| TcCLB.506955.261  | hypothetical protein, conserved (pseudogene)              | 0,3144 | 0,4511     |
| TcCLB.507701.10   | mucin TcMUCII, putative                                   | 0,3143 | 0,1978     |
| TcCLB.511875.9    | mucin-associated surface protein (MASP), putative         | 0,3143 | 0,2379     |
| TcCLB.508645.59   | dynein light chain, putative                              | 0,3139 | 0,01714    |
| TcCLB.504827.80   | hypothetical protein, conserved                           | 0,3139 | 0,1019     |
| TcCLB.506799.110  | hypothetical protein                                      | 0,3139 | 0,5777     |
| TcCLB.508153.1060 | hypothetical protein, conserved                           | 0,3138 | 0,2754     |
| TcCLB.511181.80   | threonyl-tRNA synthetase, putative                        | 0,3137 | 0,00007088 |
| TcCLB.505183.140  | protein kinase, putative                                  | 0,3135 | 0,01014    |
| TcCLB.509735.30   | retrotransposon hot spot protein (RHS, pseudogene), putat | 0,3133 | 0,01005    |
| TcCLB.506925.460  | hypothetical protein, conserved                           | 0,3133 | 0,08782    |
| TcCLB.506391.50   | polyubiquitin (pseudogene), putative                      | 0,3132 | 0,0313     |
| TcCLB.509169.20   | hypothetical protein, conserved                           | 0,3131 | 0,01213    |
| TcCLB.510431.70   | hypothetical protein, conserved                           | 0,3128 | 0,07151    |
| TcCLB.506845.31   | ATP-dependent DEAD/H RNA helicase (pseudogene), putat     | 0,3128 | 0,575      |
| TcCLB.506755.270  | hypothetical protein, conserved                           | 0,3125 | 0,4234     |
| TcCLB.511553.160  | 90 kDa surface protein, putative                          | 0,3125 | 0,5954     |
| TcCLB.503905.30   | hypothetical protein, conserved                           | 0,3124 | 0,01922    |
| TcCLB.508233.30   | mucin TcSMUGS, putative                                   | 0,3123 | 0,1619     |
| TcCLB.509805.240  | hypothetical protein, conserved (pseudogene)              | 0,3121 | 0,08256    |
| TcCLB.509471.30   | hypothetical protein, conserved                           | 0,3117 | 0,06335    |
| TcCLB.507907.60   | retrotransposon hot spot (RHS) protein, putative          | 0,3115 | 0,1931     |
| TcCLB.510737.60   | hypothetical protein, conserved                           | 0,3114 | 0,03863    |
| TcCLB.508349.10   | hypothetical protein, conserved                           | 0,3114 | 0,07746    |
| TcCLB.511133.20   | thymidine kinase, putative                                | 0,3114 | 0,09513    |
| TcCLB.506211.80   | hypothetical protein, conserved                           | 0,3113 | 0,05012    |
| TcCLB.504021.74   | hypothetical protein, conserved                           | 0,311  | 0,1088     |
| TcCLB.511733.100  | hypothetical protein, conserved                           | 0,3109 | 0,02334    |
| TcCLB.506457.10   | metallo-peptidase, Clan MG, Family M24 (MetAP2)           | 0,3108 | 0,002521   |
| TcCLB.505807.50   | hypothetical protein, conserved                           | 0,3105 | 0,05283    |
| TcCLB.506407.80   | intraflagellar transport protein 81, putative (IFT81)     | 0,3103 | 0,0001552  |
| TcCLB.507477.20   | hypothetical protein, conserved (pseudogene)              | 0,3102 | 0,001756   |
| TcCLB.508277.330  | actin-like protein, putative                              | 0,3095 | 0,01611    |
| TcCLB.506267.30   | mucin TcMUCII, putative                                   | 0,3095 | 0,4714     |
| TcCLB.506667.80   | mucin-associated surface protein (MASP), putative         | 0,3095 | 0,605      |

|                  |                                                               |        |          |
|------------------|---------------------------------------------------------------|--------|----------|
| TcCLB.507651.10  | hypothetical protein, conserved (pseudogene)                  | 0,3094 | 0,002232 |
| TcCLB.507023.210 | hypothetical protein, conserved                               | 0,3094 | 0,2049   |
| TcCLB.510515.130 | S-adenosyl-methyltransferase mraW-like protein, putative      | 0,3093 | 0,02123  |
| TcCLB.508823.100 | hypothetical protein, conserved                               | 0,3093 | 0,0314   |
| TcCLB.511233.130 | mucin-associated surface protein (MASP), putative             | 0,3093 | 0,7281   |
| TcCLB.508589.10  | hypothetical protein                                          | 0,3086 | 0,3761   |
| TcCLB.511867.140 | Acyl carrier protein, mitochondrial, putative (ACP)           | 0,3085 | 0,004081 |
| TcCLB.510945.20  | hypothetical protein, conserved                               | 0,3085 | 0,01584  |
| TcCLB.506999.90  | rieske iron-sulfur protein, mitochondrial precursor, putative | 0,3082 | 0,000694 |
| TcCLB.509805.60  | Ras-related protein Rab5A, putative (RAB5A)                   | 0,3082 | 0,004285 |
| TcCLB.510659.90  | hypothetical protein, conserved                               | 0,3082 | 0,05278  |
| TcCLB.509607.10  | ubiquitin-conjugating enzyme E2, putative                     | 0,3081 | 0,01784  |
| TcCLB.422507.10  | glycine dehydrogenase [decarboxylating], putative             | 0,3081 | 0,1877   |
| TcCLB.508461.350 | hypothetical protein, conserved                               | 0,308  | 0,008349 |
| TcCLB.506977.30  | hypothetical protein, conserved                               | 0,308  | 0,02765  |
| TcCLB.509417.30  | retrotransposon hot spot protein (RHS, pseudogene), putative  | 0,308  | 0,3433   |
| TcCLB.507835.80  | trans-sialidase, putative                                     | 0,3079 | 0,4916   |
| TcCLB.511543.30  | amino acid transporter, putative                              | 0,3078 | 0,2515   |
| TcCLB.510671.31  | hypothetical protein, conserved                               | 0,3077 | 0,02294  |
| TcCLB.509027.70  | kinetoplastid kinetochore protein 19, putative (kkt19)        | 0,3077 | 0,02882  |
| TcCLB.507993.40  | hypothetical protein, conserved                               | 0,3076 | 0,01193  |
| TcCLB.506147.100 | hypothetical protein, conserved                               | 0,3075 | 0,007044 |
| TcCLB.506503.53  | hypothetical protein                                          | 0,3075 | 0,06327  |
| TcCLB.508899.140 | hypothetical protein                                          | 0,3073 | 0,0418   |
| TcCLB.510227.10  | hypothetical protein, conserved                               | 0,3071 | 0,1555   |
| TcCLB.510373.10  | mucin-associated surface protein (MASP), putative             | 0,3071 | 0,3883   |
| TcCLB.508063.9   | dispersed gene family protein 1 (DGF-1), putative (fragme     | 0,307  | 0,3411   |
| TcCLB.506195.210 | hypothetical protein, conserved                               | 0,3069 | 0,00458  |
| TcCLB.510355.70  | retrotransposon hot spot protein (RHS, pseudogene), putative  | 0,3067 | 0,04649  |
| TcCLB.503733.10  | hypothetical protein, conserved                               | 0,3067 | 0,1167   |
| TcCLB.504427.80  | hypothetical protein, conserved                               | 0,3066 | 0,07068  |
| TcCLB.506517.40  | hypothetical protein                                          | 0,3066 | 0,3757   |
| TcCLB.405165.19  | hypothetical protein, conserved (fragment)                    | 0,3065 | 0,05238  |
| TcCLB.508647.50  | hypothetical protein, conserved (pseudogene)                  | 0,3064 | 0,001028 |
| TcCLB.508411.50  | hypothetical protein, conserved                               | 0,3063 | 0,01864  |
| TcCLB.415187.19  | hypothetical protein, conserved (fragment)                    | 0,3063 | 0,3771   |
| TcCLB.508665.40  | hypothetical protein, conserved                               | 0,3061 | 0,2048   |
| TcCLB.506559.40  | cardiolipin synthetase, putative (cls)                        | 0,306  | 0,001742 |
| TcCLB.508601.30  | DNA-directed RNA polymerase I/III subunit, putative           | 0,3059 | 0,09174  |
| TcCLB.506945.150 | hypothetical protein                                          | 0,3058 | 0,08412  |
| TcCLB.509669.14  | thioredoxin, putative                                         | 0,3058 | 0,1395   |
| TcCLB.510385.10  | dispersed gene family protein 1 (DGF-1), putative             | 0,3057 | 0,3051   |
| TcCLB.508265.30  | hypothetical protein                                          | 0,3056 | 0,01889  |
| TcCLB.509081.150 | mucin-associated surface protein (MASP), putative             | 0,3055 | 0,4303   |
| TcCLB.503599.10  | protein kinase, putative                                      | 0,3053 | 0,1097   |



|                  |                                                           |        |            |
|------------------|-----------------------------------------------------------|--------|------------|
| TcCLB.509897.260 | hypothetical protein                                      | 0,3053 | 0,3587     |
| TcCLB.503575.60  | protein kinase, putative                                  | 0,3052 | 0,01313    |
| TcCLB.507209.50  | hypothetical protein, conserved                           | 0,3052 | 0,04049    |
| TcCLB.506537.230 | hypothetical protein, conserved                           | 0,3052 | 0,3365     |
| TcCLB.509081.5   | mucin-associated surface protein (MASP), putative         | 0,3052 | 0,5429     |
| TcCLB.507023.60  | hypothetical protein, conserved                           | 0,3049 | 0,05203    |
| TcCLB.506437.20  | tuzin, putative                                           | 0,3048 | 0,00005819 |
| TcCLB.511211.104 | hypothetical protein, conserved                           | 0,3048 | 0,1471     |
| TcCLB.508431.5   | hypothetical protein                                      | 0,3047 | 0,5476     |
| TcCLB.511715.70  | hypothetical protein, conserved                           | 0,3045 | 0,04379    |
| TcCLB.505193.84  | hypothetical protein, conserved                           | 0,3045 | 0,07457    |
| TcCLB.504153.320 | Golgi reassembly stacking protein (GRASP homologue), pu   | 0,3043 | 0,04707    |
| TcCLB.510329.370 | hypothetical protein, conserved                           | 0,3043 | 0,1162     |
| TcCLB.503839.5   | chloride channel protein, putative                        | 0,3043 | 0,1971     |
| TcCLB.506763.150 | mucin-associated surface protein (MASP), putative         | 0,3043 | 0,7065     |
| TcCLB.504097.30  | hypothetical protein, conserved                           | 0,3042 | 0,00137    |
| TcCLB.509525.420 | mucin TcMUCII, putative                                   | 0,3042 | 0,7219     |
| TcCLB.511865.19  | frataxin-like, mitochondrial precursor, putative          | 0,304  | 0,09567    |
| TcCLB.506967.27  | syntaxin binding protein (pseudogene), putative           | 0,3037 | 0,6657     |
| TcCLB.509945.30  | hypothetical protein                                      | 0,3036 | 0,001997   |
| TcCLB.510853.120 | hypothetical protein, conserved                           | 0,3034 | 0,002255   |
| TcCLB.503927.9   | dynein light intermediate chain, putative                 | 0,3034 | 0,02529    |
| TcCLB.505999.60  | hypothetical protein                                      | 0,3034 | 0,2136     |
| TcCLB.423205.10  | trans-sialidase, putative (fragment)                      | 0,3034 | 0,8343     |
| TcCLB.506113.40  | hypothetical protein, conserved (pseudogene)              | 0,3033 | 0,08367    |
| TcCLB.511695.10  | hypothetical protein                                      | 0,3033 | 0,3861     |
| TcCLB.504153.20  | phosphoglycerate kinase, putative                         | 0,3032 | 0,001427   |
| TcCLB.508859.70  | hypothetical protein, conserved                           | 0,3032 | 0,06328    |
| TcCLB.511303.80  | hypothetical protein, conserved                           | 0,3031 | 0,07279    |
| TcCLB.511049.40  | leucyl-tRNA synthetase, putative                          | 0,3029 | 0,00006688 |
| TcCLB.413893.10  | trans-sialidase (pseudogene), putative                    | 0,3029 | 0,5356     |
| TcCLB.506479.30  | hypothetical protein, conserved                           | 0,3028 | 0,06633    |
| TcCLB.506737.10  | hypothetical protein, conserved                           | 0,3026 | 0,008982   |
| TcCLB.506247.400 | hypothetical protein, conserved                           | 0,3025 | 0,1087     |
| TcCLB.509419.230 | trans-sialidase (pseudogene), putative                    | 0,3024 | 0,2091     |
| TcCLB.508593.100 | hypothetical protein, conserved                           | 0,3024 | 0,2446     |
| TcCLB.507071.190 | trans-sialidase, Group V, putative                        | 0,3024 | 0,4672     |
| TcCLB.509525.120 | mucin TcMUCII, putative                                   | 0,3024 | 0,6164     |
| TcCLB.498829.10  | mucin TcMUC, putative                                     | 0,3023 | 0,2808     |
| TcCLB.508227.10  | hypothetical protein                                      | 0,3023 | 0,7462     |
| TcCLB.510307.240 | trans-sialidase, Group VIII, putative                     | 0,3022 | 0,2429     |
| TcCLB.509895.40  | hypothetical protein, conserved                           | 0,3021 | 0,004776   |
| TcCLB.511849.10  | mucin TcMUCI, putative                                    | 0,3021 | 0,3044     |
| TcCLB.506209.19  | dispersed gene family protein 1 (DGF-1), putative (fragme | 0,3021 | 0,5298     |
| TcCLB.509769.70  | DNA polymerase theta (helicase domain only), putative     | 0,302  | 0,0006546  |

|                  |                                                              |        |           |
|------------------|--------------------------------------------------------------|--------|-----------|
| TcCLB.511301.120 | hypothetical protein, conserved                              | 0,302  | 0,003456  |
| TcCLB.503655.30  | mucin-like glycoprotein, putative                            | 0,3019 | 0,4476    |
| TcCLB.509339.4   | poly(A) export protein, putative                             | 0,3017 | 0,05497   |
| TcCLB.511425.19  | hypothetical protein, conserved (pseudogene)                 | 0,3016 | 0,08299   |
| TcCLB.510297.50  | hypothetical protein, conserved                              | 0,3015 | 0,03057   |
| TcCLB.506145.40  | hypothetical protein, conserved                              | 0,3014 | 0,0003576 |
| TcCLB.511173.24  | mucin-associated surface protein (MASP), putative            | 0,3014 | 0,482     |
| TcCLB.503819.30  | eukaryotic translation initiation factor 2 subunit, putative | 0,3013 | 0,0008148 |
| TcCLB.506985.60  | inositol polyphosphate kinase-like protein, putative         | 0,3013 | 0,0872    |
| TcCLB.510689.70  | hypothetical protein, conserved                              | 0,301  | 0,2649    |
| TcCLB.506777.80  | seryl-tRNA synthetase, putative                              | 0,3009 | 9,057E-06 |
| TcCLB.509245.29  | hypothetical protein, conserved                              | 0,3009 | 0,1419    |
| TcCLB.511821.110 | translation initiation factor IF-2, putative                 | 0,3008 | 0,004542  |
| TcCLB.504491.20  | trans-sialidase, putative                                    | 0,3008 | 0,5233    |
| TcCLB.504069.70  | vacuolar ATP synthase, putative                              | 0,3007 | 0,001028  |
| TcCLB.505073.10  | hypothetical protein                                         | 0,3007 | 0,002033  |
| TcCLB.506591.30  | hypothetical protein, conserved                              | 0,3007 | 0,01493   |
| TcCLB.511751.50  | protein kinase, putative                                     | 0,3007 | 0,02031   |
| TcCLB.507723.41  | trans-sialidase (pseudogene), putative                       | 0,3005 | 0,3359    |
| TcCLB.508247.30  | hypothetical protein, conserved                              | 0,3005 | 0,6475    |
| TcCLB.508805.90  | hypothetical protein, conserved                              | 0,3003 | 0,3184    |
| TcCLB.511467.4   | hypothetical protein, conserved                              | 0,3002 | 0,04737   |
| TcCLB.503693.29  | hypothetical protein                                         | 0,3    | 0,03071   |
| TcCLB.503611.50  | hypothetical protein, conserved                              | 0,3    | 0,1271    |
| TcCLB.511399.50  | mucin-associated surface protein (MASP), putative            | 0,2999 | 0,4142    |
| TcCLB.506559.220 | hypothetical protein, conserved                              | 0,2997 | 0,02609   |
| TcCLB.510315.4   | hypothetical protein, conserved (fragment)                   | 0,2997 | 0,1179    |
| TcCLB.509777.80  | hypothetical protein, conserved                              | 0,2995 | 0,04114   |
| TcCLB.508247.110 | serine-alanine-and proline-rich protein, putative            | 0,2995 | 0,4522    |
| TcCLB.509393.10  | hypothetical protein, conserved                              | 0,2993 | 0,02208   |
| TcCLB.507663.30  | hypothetical protein, conserved                              | 0,2993 | 0,03421   |
| TcCLB.508881.90  | hypothetical protein, conserved                              | 0,2993 | 0,0484    |
| TcCLB.511189.30  | 40S ribosomal protein S13, putative                          | 0,2991 | 0,0006339 |
| TcCLB.511585.125 | hypothetical protein, conserved                              | 0,2991 | 0,0485    |
| TcCLB.509025.10  | hypothetical protein, conserved                              | 0,299  | 0,2404    |
| TcCLB.508577.70  | hypothetical protein                                         | 0,2989 | 0,00611   |
| TcCLB.511217.145 | ribosomal protein L39, putative                              | 0,2988 | 0,005118  |
| TcCLB.508807.10  | ATP-dependent Clp protease subunit, heat shock protein 1C    | 0,2988 | 0,01338   |
| TcCLB.511907.210 | hypothetical protein, conserved                              | 0,2988 | 0,07624   |
| TcCLB.507825.49  | hypothetical protein, conserved (fragment)                   | 0,2988 | 0,2168    |
| TcCLB.503531.30  | COP9 signalosome complex subunit 5, putative (pseudoger      | 0,2987 | 0,04277   |
| TcCLB.508595.35  | hypothetical protein (pseudogene)                            | 0,2987 | 0,52      |
| TcCLB.507255.10  | surface protease GP63 (pseudogene), putative                 | 0,2987 | 0,5838    |
| TcCLB.503413.19  | hypothetical protein                                         | 0,2986 | 0,06328   |
| TcCLB.510355.230 | hypothetical protein, conserved                              | 0,2985 | 0,09097   |

|                  |                                                               |        |            |
|------------------|---------------------------------------------------------------|--------|------------|
| TcCLB.503499.20  | hypothetical protein, conserved                               | 0,2981 | 0,04401    |
| TcCLB.503607.7   | glycine dehydrogenase (pseudogene), putative                  | 0,2981 | 0,09672    |
| TcCLB.511431.20  | hypothetical protein, conserved                               | 0,2977 | 0,0001512  |
| TcCLB.503935.20  | 2-oxoglutarate dehydrogenase, E2 component, dihydrolipo:      | 0,2975 | 0,00116    |
| TcCLB.511069.10  | 40S ribosomal protein S8, putative                            | 0,2975 | 0,008945   |
| TcCLB.508207.150 | Silent information regulator 2 related protein 1, putative (S | 0,2975 | 0,04216    |
| TcCLB.506401.220 | electron transfer flavoprotein-ubiquinone oxidoreductase,     | 0,2974 | 0,03957    |
| TcCLB.509573.10  | small GTP-binding protein Rab7, putative                      | 0,2973 | 0,06544    |
| TcCLB.509979.270 | mucin-associated surface protein (MASP), putative             | 0,2971 | 0,1631     |
| TcCLB.507647.30  | hypothetical protein, conserved                               | 0,2971 | 0,2639     |
| TcCLB.506475.130 | hypothetical protein, conserved                               | 0,2969 | 0,002695   |
| TcCLB.510477.80  | mucin-associated surface protein (MASP), putative             | 0,2969 | 0,4424     |
| TcCLB.506629.80  | vesicular transport protein (CDC48 homologue), putative       | 0,2967 | 0,0002102  |
| TcCLB.508977.40  | trans-sialidase, Group V, putative                            | 0,2967 | 0,1364     |
| TcCLB.511921.140 | mucin-associated surface protein (MASP), putative             | 0,2966 | 0,6816     |
| TcCLB.510323.70  | hypothetical protein, conserved                               | 0,2964 | 0,008876   |
| TcCLB.504105.190 | hypothetical protein, conserved                               | 0,2963 | 0,04024    |
| TcCLB.509693.60  | hypothetical protein, conserved                               | 0,2963 | 0,1147     |
| TcCLB.506765.43  | hypothetical protein                                          | 0,2962 | 0,2473     |
| TcCLB.507005.4   | acyl transferase-like protein                                 | 0,296  | 0,04105    |
| TcCLB.507503.20  | glycine dehydrogenase [decarboxylating] (pseudogene), pu      | 0,2959 | 0,03411    |
| TcCLB.507603.110 | hypothetical protein, conserved                               | 0,2958 | 0,04452    |
| TcCLB.504505.20  | retrotransposon hot spot (RHS) protein, putative              | 0,2957 | 0,1553     |
| TcCLB.507611.380 | hypothetical protein                                          | 0,2955 | 0,04118    |
| TcCLB.511741.50  | C-1-tetrahydrofolate synthase, cytoplasmic, putative          | 0,2955 | 0,06152    |
| TcCLB.420495.10  | hypothetical protein, conserved (pseudogene)                  | 0,2954 | 0,1253     |
| TcCLB.508351.30  | hypothetical protein, conserved                               | 0,295  | 0,03375    |
| TcCLB.510743.60  | phospholipase A1, putative                                    | 0,295  | 0,06861    |
| TcCLB.506581.69  | Mutt-Nudix-related hydrolase 5, putative                      | 0,2949 | 0,1629     |
| TcCLB.506993.130 | mucin-associated surface protein (MASP, pseudogene), pu       | 0,2949 | 0,2565     |
| TcCLB.504105.80  | hypothetical protein, conserved                               | 0,2942 | 0,003801   |
| TcCLB.506265.170 | hypothetical protein, conserved                               | 0,2941 | 0,08271    |
| TcCLB.504013.11  | ribosomal protein L13, putative (fragment)                    | 0,2939 | 0,00001404 |
| TcCLB.507499.90  | trans-sialidase (pseudogene), putative                        | 0,2938 | 0,04883    |
| TcCLB.509055.69  | hypothetical protein, conserved (fragment)                    | 0,2937 | 0,3063     |
| TcCLB.511839.25  | elongation factor 1-gamma (EF-1-gamma, pseudogene), p         | 0,2934 | 0,6111     |
| TcCLB.507625.130 | hypothetical protein, conserved                               | 0,2932 | 0,04554    |
| TcCLB.508629.74  | retrotransposon hot spot protein (RHS, pseudogene), putat     | 0,2932 | 0,0658     |
| TcCLB.510395.10  | ATP synthase F1, alpha subunit, putative (ATPF1A)             | 0,2931 | 0,006858   |
| TcCLB.506297.10  | hypothetical protein                                          | 0,2931 | 0,007827   |
| TcCLB.507203.5   | trans-sialidase (pseudogene), putative                        | 0,2931 | 0,09219    |
| TcCLB.506117.9   | dispersed gene family protein 1 (DGF-1), putative             | 0,2931 | 0,1029     |
| TcCLB.508857.130 | hypothetical protein, conserved                               | 0,293  | 0,1155     |
| TcCLB.508543.20  | protein kinase, putative                                      | 0,2929 | 0,004621   |
| TcCLB.506855.150 | hypothetical protein, conserved                               | 0,2928 | 0,01858    |

|                  |                                                              |        |           |
|------------------|--------------------------------------------------------------|--------|-----------|
| TcCLB.510661.279 | hypothetical protein, conserved                              | 0,2928 | 0,133     |
| TcCLB.504017.50  | hypothetical protein, conserved                              | 0,2927 | 0,2024    |
| TcCLB.508153.90  | hypothetical protein                                         | 0,2923 | 0,07636   |
| TcCLB.509229.80  | mitochondrial processing peptidase alpha subunit, putative   | 0,2922 | 0,001436  |
| TcCLB.506247.170 | ATPase, putative                                             | 0,2922 | 0,0144    |
| TcCLB.510421.320 | pyruvate dehydrogenase E1 beta subunit, putative             | 0,2922 | 0,01472   |
| TcCLB.510359.220 | hypothetical protein, conserved                              | 0,2922 | 0,01748   |
| TcCLB.503957.30  | retrotransposon hot spot (RHS) protein, putative             | 0,2922 | 0,1077    |
| TcCLB.507753.10  | trans-sialidase, Group III, putative                         | 0,2922 | 0,3655    |
| TcCLB.506629.20  | hypothetical protein, conserved                              | 0,292  | 0,05852   |
| TcCLB.511621.259 | hypothetical protein, conserved                              | 0,2918 | 0,1926    |
| TcCLB.510785.20  | pteridine reductase (pseudogene), putative                   | 0,2917 | 0,001451  |
| TcCLB.509717.50  | hypothetical protein, conserved                              | 0,2915 | 0,0006969 |
| TcCLB.508177.30  | hypothetical protein, conserved                              | 0,2915 | 0,01605   |
| TcCLB.508603.10  | trans-sialidase, putative                                    | 0,2915 | 0,3735    |
| TcCLB.511407.30  | hypothetical protein                                         | 0,2914 | 0,005364  |
| TcCLB.511817.151 | histone H2A, putative                                        | 0,2913 | 0,5533    |
| TcCLB.507801.70  | protein kinase, putative                                     | 0,2912 | 0,2205    |
| TcCLB.508279.10  | trans-sialidase (pseudogene), putative                       | 0,2911 | 0,3135    |
| TcCLB.503995.50  | serine peptidase, clan SC, family S9A-like protein (OPB)     | 0,291  | 0,007524  |
| TcCLB.509171.54  | hypothetical protein, conserved                              | 0,2906 | 0,13      |
| TcCLB.503973.290 | mucin TcMUCII, putative                                      | 0,2906 | 0,6445    |
| TcCLB.504009.60  | hypothetical protein, conserved                              | 0,2904 | 0,007501  |
| TcCLB.509471.10  | hypothetical protein, conserved                              | 0,2904 | 0,07348   |
| TcCLB.506211.30  | intraflagellar transport protein 80, putative (IFT80)        | 0,2903 | 0,02075   |
| TcCLB.504147.240 | hypothetical protein, conserved                              | 0,2903 | 0,04012   |
| TcCLB.511585.269 | retrotransposon hot spot protein (RHS, pseudogene), putative | 0,2903 | 0,1949    |
| TcCLB.507001.80  | acyl-CoA dehydrogenase, putative                             | 0,29   | 0,02947   |
| TcCLB.510311.120 | hypothetical protein                                         | 0,2899 | 0,1058    |
| TcCLB.506171.35  | ATP-dependent DEAD/H RNA helicase (pseudogene), putative     | 0,2899 | 0,5278    |
| TcCLB.506183.20  | dispersed gene family protein 1 (DGF-1), putative            | 0,2898 | 0,2144    |
| TcCLB.510495.30  | trans-sialidase (pseudogene), putative                       | 0,2898 | 0,4649    |
| TcCLB.506511.60  | flavoprotein monooxygenase, putative                         | 0,2895 | 0,003776  |
| TcCLB.398009.10  | retrotransposon hot spot protein (RHS, pseudogene), putative | 0,2894 | 0,05757   |
| TcCLB.506417.50  | hypothetical protein, conserved                              | 0,2894 | 0,1119    |
| TcCLB.510661.244 | hypothetical protein, conserved                              | 0,2893 | 0,1096    |
| TcCLB.507777.20  | hypothetical protein, conserved                              | 0,2893 | 0,1204    |
| TcCLB.504033.110 | hypothetical protein, conserved                              | 0,2892 | 0,04471   |
| TcCLB.503973.300 | surface protease GP63 (pseudogene), putative                 | 0,2892 | 0,6196    |
| TcCLB.510281.5   | mucin TcMUCII (pseudogene), putative                         | 0,2892 | 0,6586    |
| TcCLB.511035.10  | surface protease GP63, putative                              | 0,2891 | 0,004651  |
| TcCLB.510659.28  | hypothetical protein, conserved                              | 0,2891 | 0,05365   |
| TcCLB.505949.160 | mucin TcMUCII, putative                                      | 0,2891 | 0,6043    |
| TcCLB.509127.59  | hypothetical protein, conserved                              | 0,2889 | 0,3811    |
| TcCLB.507069.220 | mucin-associated surface protein (MASP), putative            | 0,2889 | 0,5481    |

|                  |                                                           |        |            |
|------------------|-----------------------------------------------------------|--------|------------|
| TcCLB.511209.10  | V-type proton ATPase subunit B, putative                  | 0,2888 | 0,003939   |
| TcCLB.508139.40  | retrotransposon hot spot protein (RHS, pseudogene), putat | 0,2886 | 0,04058    |
| TcCLB.504149.30  | hypothetical protein, conserved                           | 0,2885 | 0,04335    |
| TcCLB.506409.140 | mucin TcMUCII, putative                                   | 0,2885 | 0,6912     |
| TcCLB.510281.20  | surface protease GP63, putative                           | 0,2884 | 0,4926     |
| TcCLB.510737.50  | hypothetical protein, conserved                           | 0,2882 | 0,004264   |
| TcCLB.506669.10  | hypothetical protein, conserved                           | 0,2882 | 0,1656     |
| TcCLB.508415.10  | hypothetical protein, conserved (pseudogene)              | 0,2878 | 0,2288     |
| TcCLB.508201.20  | surface protease GP63 (pseudogene), putative              | 0,2878 | 0,4626     |
| TcCLB.508873.580 | mucin-associated surface protein (MASP), putative         | 0,2876 | 0,5662     |
| TcCLB.503841.60  | hypothetical protein, conserved                           | 0,2873 | 0,04692    |
| TcCLB.508539.40  | hypothetical protein, conserved                           | 0,2873 | 0,08279    |
| TcCLB.506151.4   | hypothetical protein, conserved (fragment)                | 0,2872 | 0,0912     |
| TcCLB.506247.190 | nuclear lim interactor-interacting factor, putative       | 0,287  | 0,3336     |
| TcCLB.511801.14  | protein kinase, putative (LDK)                            | 0,2869 | 0,04232    |
| TcCLB.511603.304 | mucin TcMUCII, putative                                   | 0,2867 | 0,6214     |
| TcCLB.506431.20  | retrotransposon hot spot protein (RHS, pseudogene), putat | 0,2866 | 0,02832    |
| TcCLB.507035.75  | retrotransposon hot spot protein (RHS, pseudogene), putat | 0,2863 | 0,07101    |
| TcCLB.511471.20  | trans-sialidase (pseudogene), putative                    | 0,2863 | 0,2295     |
| TcCLB.459619.10  | hypothetical protein, conserved (pseudogene)              | 0,2863 | 0,5004     |
| TcCLB.506307.10  | mucin-associated surface protein (MASP), putative         | 0,2863 | 0,6097     |
| TcCLB.511311.7   | trans-sialidase, putative (fragment)                      | 0,2862 | 0,2722     |
| TcCLB.509795.40  | hypothetical protein, conserved                           | 0,2859 | 0,06888    |
| TcCLB.506151.20  | hypothetical protein, conserved                           | 0,2855 | 0,001046   |
| TcCLB.503787.50  | mucin TcMUCII, putative                                   | 0,2855 | 0,5612     |
| TcCLB.504009.20  | hypothetical protein, conserved                           | 0,2852 | 0,04923    |
| TcCLB.509029.120 | ATP-dependent DNA helicase, putative                      | 0,285  | 0,02585    |
| TcCLB.485889.10  | hypothetical protein, conserved                           | 0,2848 | 0,007583   |
| TcCLB.508041.80  | protein transport protein Sec31, putative (pseudogene)    | 0,2846 | 0,002029   |
| TcCLB.507623.101 | surface protease GP63 (pseudogene), putative              | 0,2845 | 0,1246     |
| TcCLB.506233.20  | retrotransposon hot spot protein (RHS, pseudogene), putat | 0,2845 | 0,4213     |
| TcCLB.430605.29  | 40S ribosomal protein S3, putative                        | 0,2844 | 0,00288    |
| TcCLB.508221.502 | hypothetical protein, conserved (pseudogene)              | 0,2843 | 0,4163     |
| TcCLB.510463.190 | retrotransposon hot spot (RHS) protein, putative          | 0,2842 | 0,2106     |
| TcCLB.506637.20  | hypothetical protein, conserved                           | 0,284  | 0,09539    |
| TcCLB.508309.5   | trans-sialidase, putative (fragment)                      | 0,284  | 0,6324     |
| TcCLB.504069.30  | 60S ribosomal protein L32, putative                       | 0,2839 | 0,01069    |
| TcCLB.510015.20  | mucin TcMUCII, putative                                   | 0,2839 | 0,5846     |
| TcCLB.507765.80  | hypothetical protein, conserved                           | 0,2838 | 0,03208    |
| TcCLB.509799.5   | hypothetical protein, conserved                           | 0,2838 | 0,06643    |
| TcCLB.506409.220 | hypothetical protein                                      | 0,2837 | 0,11       |
| TcCLB.508169.129 | Mutt-Nudix-related hydrolase 5, putative (Nudix5)         | 0,2837 | 0,1855     |
| TcCLB.507515.30  | hypothetical protein, conserved                           | 0,2836 | 0,2144     |
| TcCLB.504639.19  | dispersed gene family protein 1 (DGF-1), putative (fragme | 0,2836 | 0,292      |
| TcCLB.509289.5   | tuzin (fragment)                                          | 0,2835 | 0,00004416 |

|                  |                                                           |        |          |
|------------------|-----------------------------------------------------------|--------|----------|
| TcCLB.509699.35  | hypothetical protein, conserved (pseudogene)              | 0,2834 | 0,4119   |
| TcCLB.507093.320 | hypothetical protein, conserved                           | 0,2831 | 0,0378   |
| TcCLB.511859.50  | hypothetical protein, conserved                           | 0,2829 | 0,0597   |
| TcCLB.511667.30  | trans-sialidase, Group I, putative                        | 0,2829 | 0,6756   |
| TcCLB.506025.14  | ribosomal protein S29, putative                           | 0,2828 | 0,03787  |
| TcCLB.506345.70  | retrotransposon hot spot protein (RHS, pseudogene), putat | 0,2828 | 0,1808   |
| TcCLB.511277.210 | peroxisomal enoyl-coa hydratase, putative                 | 0,2826 | 0,002208 |
| TcCLB.507547.40  | enoyl-CoA hydratase/Enoyl-CoA isomerase/3-hydroxyacyl-(   | 0,2826 | 0,01641  |
| TcCLB.507671.20  | hypothetical protein, conserved                           | 0,2826 | 0,1861   |
| TcCLB.508539.155 | mucin TcMUCII, putative                                   | 0,2825 | 0,5593   |
| TcCLB.510197.220 | mucin-associated surface protein (MASP, pseudogene), pu   | 0,2824 | 0,4484   |
| TcCLB.508953.19  | hypothetical protein, conserved                           | 0,2822 | 0,04004  |
| TcCLB.511559.50  | hypothetical protein, conserved                           | 0,2821 | 0,009528 |
| TcCLB.510275.21  | surface protease GP63 (pseudogene), putative              | 0,2821 | 0,665    |
| TcCLB.508117.30  | elongation factor 1-gamma (EF-1-gamma, pseudogene), p     | 0,282  | 0,3289   |
| TcCLB.509525.240 | mucin-associated surface protein (MASP), putative         | 0,2819 | 0,6876   |
| TcCLB.510971.30  | trans-sialidase, Group VIII, putative                     | 0,2818 | 0,4533   |
| TcCLB.508173.219 | hypothetical protein, conserved                           | 0,2816 | 0,004476 |
| TcCLB.503977.50  | surface protease GP63 (pseudogene), putative              | 0,2816 | 0,6078   |
| TcCLB.509167.30  | hypothetical protein, conserved                           | 0,2812 | 0,1499   |
| TcCLB.510679.90  | expression site-associated gene (ESAG-like, pseudogene),  | 0,2812 | 0,5065   |
| TcCLB.508479.330 | hypothetical protein, conserved                           | 0,2811 | 0,004081 |
| TcCLB.506737.151 | surface protease GP63 (pseudogene), putative              | 0,281  | 0,1038   |
| TcCLB.511921.100 | trans-sialidase (pseudogene), putative                    | 0,281  | 0,2742   |
| TcCLB.505999.140 | Metal-binding domain-containing protein                   | 0,2809 | 0,06211  |
| TcCLB.506225.20  | trans-sialidase (pseudogene), putative                    | 0,2807 | 0,3572   |
| TcCLB.506529.90  | puromycin-sensitive aminopeptidase-like protein, putative | 0,2806 | 0,06903  |
| TcCLB.508027.80  | hypothetical protein, conserved                           | 0,2805 | 0,008739 |
| TcCLB.510885.20  | hypothetical protein, conserved                           | 0,2804 | 0,04644  |
| TcCLB.506207.20  | hypothetical protein, conserved                           | 0,2802 | 0,00356  |
| TcCLB.503751.30  | hypothetical protein, conserved (pseudogene)              | 0,2801 | 0,04568  |
| TcCLB.510329.120 | Present in the outer mitochondrial membrane proteome 2i   | 0,2799 | 0,03399  |
| TcCLB.506391.10  | calmodulin (CALA2)                                        | 0,2798 | 0,05446  |
| TcCLB.508737.100 | ATP-dependent Clp protease subunit, heat shock protein 7  | 0,2795 | 0,004844 |
| TcCLB.507467.90  | diacylglycerol acyltransferase, putative                  | 0,2795 | 0,02609  |
| TcCLB.508577.30  | retrotransposon hot spot protein (RHS, pseudogene), putat | 0,2795 | 0,04196  |
| TcCLB.511821.10  | Cytoplasmic dynein 1 heavy chain (DYNC1H1), putative      | 0,2794 | 0,003227 |
| TcCLB.511079.60  | mucin-associated surface protein (MASP), putative         | 0,2794 | 0,633    |
| TcCLB.506611.55  | elongation factor 1-gamma (EF-1-gamma, pseudogene), p     | 0,2794 | 0,6872   |
| TcCLB.506135.9   | heat shock 70 kDa protein, putative (fragment)            | 0,2793 | 0,002677 |
| TcCLB.509733.140 | hypothetical protein, conserved                           | 0,2793 | 0,008017 |
| TcCLB.510693.200 | mucin TcMUCII, putative                                   | 0,2793 | 0,6244   |
| TcCLB.506309.40  | mucin-associated surface protein (MASP), putative         | 0,2793 | 0,7025   |
| TcCLB.511421.110 | developmentally regulated phosphoprotein, putative        | 0,2791 | 0,01735  |
| TcCLB.510305.40  | hypothetical protein, conserved                           | 0,2791 | 0,05705  |

|                  |                                                           |        |          |
|------------------|-----------------------------------------------------------|--------|----------|
| TcCLB.507675.30  | hypothetical protein, conserved                           | 0,2791 | 0,254    |
| TcCLB.508139.150 | hypothetical protein, conserved                           | 0,279  | 0,3152   |
| TcCLB.504081.409 | mucin TcMUCII (pseudogene), putative                      | 0,279  | 0,7123   |
| TcCLB.511401.120 | trans-sialidase, Group V, putative                        | 0,2788 | 0,2476   |
| TcCLB.506331.30  | hypothetical protein                                      | 0,2787 | 0,595    |
| TcCLB.511213.60  | mucin-associated surface protein (MASP), putative         | 0,2786 | 0,2945   |
| TcCLB.508081.110 | trans-sialidase (pseudogene), putative                    | 0,2785 | 0,3688   |
| TcCLB.507991.123 | hypothetical protein, conserved                           | 0,2784 | 0,08895  |
| TcCLB.504071.40  | hypothetical protein                                      | 0,2779 | 0,1023   |
| TcCLB.511665.30  | retrotransposon hot spot protein (RHS, pseudogene), putat | 0,2779 | 0,2176   |
| TcCLB.503783.80  | mucin-associated surface protein (MASP), putative         | 0,2779 | 0,345    |
| TcCLB.507053.20  | hypothetical protein, conserved                           | 0,2778 | 0,04038  |
| TcCLB.511907.230 | hypothetical protein, conserved                           | 0,2778 | 0,05815  |
| TcCLB.511713.20  | hypothetical protein, conserved                           | 0,2777 | 0,03407  |
| TcCLB.507715.34  | hypothetical protein, conserved                           | 0,2776 | 0,009711 |
| TcCLB.504867.90  | glycerol-3-phosphate acyltransferase, putative            | 0,2776 | 0,03223  |
| TcCLB.508547.50  | maoC-like dehydratase, putative                           | 0,2774 | 0,03913  |
| TcCLB.511865.80  | hypothetical protein, conserved                           | 0,2774 | 0,2429   |
| TcCLB.506667.120 | mucin-associated surface protein (MASP), putative         | 0,2773 | 0,5022   |
| TcCLB.509937.50  | hypothetical protein, conserved                           | 0,2772 | 0,007745 |
| TcCLB.508051.20  | hypothetical protein, conserved                           | 0,2772 | 0,01294  |
| TcCLB.511217.60  | hypothetical protein                                      | 0,2772 | 0,05287  |
| TcCLB.504161.20  | hypothetical protein, conserved                           | 0,277  | 0,01344  |
| TcCLB.503465.20  | hypothetical protein, conserved (pseudogene)              | 0,277  | 0,1137   |
| TcCLB.509747.50  | hypothetical protein, conserved                           | 0,2769 | 0,03086  |
| TcCLB.504175.40  | dual specificity protein phosphatase, putative            | 0,2766 | 0,008806 |
| TcCLB.511269.10  | hypothetical protein, conserved                           | 0,2766 | 0,03078  |
| TcCLB.508405.60  | hypothetical protein, conserved                           | 0,2765 | 0,03428  |
| TcCLB.509717.20  | dihydrolipoamide acetyltransferase precursor, putative    | 0,2763 | 0,002386 |
| TcCLB.509099.160 | hypothetical protein, conserved                           | 0,2761 | 0,008169 |
| TcCLB.510973.9   | hypothetical protein, conserved                           | 0,2761 | 0,102    |
| TcCLB.511511.130 | hypothetical protein, conserved                           | 0,2759 | 0,01804  |
| TcCLB.510377.100 | mucin-associated surface protein (MASP), putative         | 0,2759 | 0,753    |
| TcCLB.508011.30  | mucin TcMUCII, putative                                   | 0,2756 | 0,7038   |
| TcCLB.509733.80  | hypothetical protein, conserved                           | 0,2754 | 0,107    |
| TcCLB.511143.6   | protein kinase, putative (fragment)                       | 0,2754 | 0,3948   |
| TcCLB.511681.10  | hypothetical protein                                      | 0,2754 | 0,5518   |
| TcCLB.511395.60  | serine/threonine protein kinase, putative                 | 0,2753 | 0,01106  |
| TcCLB.508445.10  | rab11B GTPase, putative                                   | 0,2753 | 0,0466   |
| TcCLB.509073.80  | hypothetical protein, conserved                           | 0,2752 | 0,0648   |
| TcCLB.503841.70  | aspartate aminotransferase, putative                      | 0,2751 | 0,3103   |
| TcCLB.511173.430 | mucin-associated surface protein (MASP), putative         | 0,2751 | 0,4967   |
| TcCLB.504151.69  | hypothetical protein, conserved                           | 0,2748 | 0,04178  |
| TcCLB.511517.60  | C-1-tetrahydrofolate synthase, cytoplasmic, putative      | 0,2746 | 0,04334  |
| TcCLB.507733.10  | trans-sialidase (pseudogene), putative                    | 0,2746 | 0,3027   |

|                  |                                                              |        |          |
|------------------|--------------------------------------------------------------|--------|----------|
| TcCLB.511821.100 | hypothetical protein, conserved                              | 0,2745 | 0,02831  |
| TcCLB.508061.154 | trans-sialidase, putative (fragment)                         | 0,2744 | 0,2143   |
| TcCLB.510119.40  | hypothetical protein, conserved                              | 0,2743 | 0,2851   |
| TcCLB.509317.10  | hypothetical protein, conserved                              | 0,2742 | 0,03502  |
| TcCLB.508815.90  | hypothetical protein, conserved                              | 0,274  | 0,04766  |
| TcCLB.511807.150 | hypothetical protein, conserved                              | 0,2737 | 0,02867  |
| TcCLB.503687.20  | glyceraldehyde-3-phosphate dehydrogenase, putative           | 0,2737 | 0,06093  |
| TcCLB.504035.110 | hypothetical protein                                         | 0,2737 | 0,07003  |
| TcCLB.508071.60  | mucin-associated surface protein (MASP), putative            | 0,2736 | 0,2081   |
| TcCLB.506769.60  | mucin-associated surface protein (MASP, pseudogene), pu      | 0,2736 | 0,5741   |
| TcCLB.510013.300 | mucin TcMUCII, putative                                      | 0,2736 | 0,7352   |
| TcCLB.432997.10  | trans-sialidase, putative                                    | 0,2733 | 0,4518   |
| TcCLB.508941.10  | retrotransposon hot spot protein (RHS, pseudogene), putat    | 0,2733 | 0,609    |
| TcCLB.510643.160 | AGP2beta-2, putative                                         | 0,2732 | 0,01975  |
| TcCLB.507095.30  | trans-sialidase, putative (fragment)                         | 0,2732 | 0,4947   |
| TcCLB.503571.10  | flagellum-adhesion glycoprotein, putative                    | 0,2729 | 0,01613  |
| TcCLB.504153.280 | hypothetical protein, conserved                              | 0,2729 | 0,04425  |
| TcCLB.511675.10  | trans-sialidase (pseudogene), putative                       | 0,2729 | 0,0948   |
| TcCLB.506855.170 | hypothetical protein, conserved                              | 0,2728 | 0,1647   |
| TcCLB.511001.70  | phosphatidylinositol-4-phosphate 5-kinase-like, putative     | 0,2727 | 0,01208  |
| TcCLB.401661.10  | trans-sialidase (pseudogene), putative                       | 0,2727 | 0,06876  |
| TcCLB.510741.110 | hypothetical protein, conserved                              | 0,2727 | 0,08539  |
| TcCLB.509643.60  | hypothetical protein, conserved                              | 0,2727 | 0,1096   |
| TcCLB.508059.4   | hypothetical protein, conserved                              | 0,2727 | 0,1642   |
| TcCLB.511281.10  | hypothetical protein, conserved                              | 0,2726 | 0,1397   |
| TcCLB.507091.30  | succinate dehydrogenase subunit                              | 0,2726 | 0,3321   |
| TcCLB.439307.19  | hypothetical protein, conserved                              | 0,2726 | 0,5578   |
| TcCLB.508799.250 | hypothetical protein, conserved                              | 0,2724 | 0,009309 |
| TcCLB.511801.60  | DEAD-box ATP-dependent RNA helicase, mitochondrial (Ml       | 0,2723 | 0,00276  |
| TcCLB.510509.30  | hypothetical protein, conserved                              | 0,2721 | 0,1917   |
| TcCLB.505193.50  | hypothetical protein                                         | 0,2721 | 0,4501   |
| TcCLB.506767.324 | mucin TcMUCII, putative                                      | 0,2719 | 0,7177   |
| TcCLB.509937.170 | hypothetical protein                                         | 0,2716 | 0,1327   |
| TcCLB.504209.10  | conserved protein, unknown function                          | 0,2716 | 0,1559   |
| TcCLB.510073.80  | hypothetical protein, conserved                              | 0,2714 | 0,01408  |
| TcCLB.506195.90  | adenylate kinase 2                                           | 0,2713 | 0,03926  |
| TcCLB.504159.10  | hypothetical protein, conserved                              | 0,2713 | 0,045    |
| TcCLB.504427.150 | oxidoreductase-like protein, putative                        | 0,2713 | 0,09766  |
| TcCLB.507959.350 | mucin-associated surface protein (MASP), putative            | 0,2713 | 0,3058   |
| TcCLB.511211.30  | hypothetical protein                                         | 0,2712 | 0,1293   |
| TcCLB.506883.130 | hypothetical protein, conserved (pseudogene)                 | 0,2709 | 0,5556   |
| TcCLB.506679.70  | eukaryotic translation initiation factor 6 (eIF-6), putative | 0,2706 | 0,006446 |
| TcCLB.508137.30  | ubiquitin-conjugating enzyme E2, putative                    | 0,2706 | 0,06795  |
| TcCLB.506409.50  | mucin TcMUCII, putative                                      | 0,2706 | 0,5409   |
| TcCLB.510275.360 | mucin TcMUCII (pseudogene), putative                         | 0,2705 | 0,6908   |



|                  |                                                           |        |          |
|------------------|-----------------------------------------------------------|--------|----------|
| TcCLB.510409.30  | hypothetical protein, conserved                           | 0,2704 | 0,07911  |
| TcCLB.503479.49  | U6 snRNA-associated Sm-like protein LSm7p                 | 0,2704 | 0,1175   |
| TcCLB.507519.100 | hypothetical protein, conserved                           | 0,2704 | 0,3533   |
| TcCLB.506525.90  | hypothetical protein, conserved                           | 0,2703 | 0,06901  |
| TcCLB.508965.90  | hypothetical protein, conserved                           | 0,2702 | 0,01257  |
| TcCLB.509215.19  | hypothetical protein, conserved                           | 0,2702 | 0,1194   |
| TcCLB.511717.80  | DNA repair and recombination helicase protein PIF4, putat | 0,2702 | 0,1657   |
| TcCLB.510749.20  | hypothetical protein, conserved                           | 0,27   | 0,06988  |
| TcCLB.510661.70  | hypothetical protein, conserved                           | 0,27   | 0,08159  |
| TcCLB.506573.30  | tyrosyl or methionyl-tRNA synthetase, putative            | 0,27   | 0,1464   |
| TcCLB.506859.110 | 3'a2rel-related protein, putative                         | 0,2698 | 0,2713   |
| TcCLB.506909.46  | hypothetical protein                                      | 0,2697 | 0,5016   |
| TcCLB.507537.40  | metacaspase, putative                                     | 0,2696 | 0,4267   |
| TcCLB.511625.160 | hypothetical protein                                      | 0,2695 | 0,4583   |
| TcCLB.508083.5   | elongation factor 1-gamma (EF-1-gamma, pseudogene), p     | 0,2695 | 0,5662   |
| TcCLB.506989.210 | U-box domain protein, putative                            | 0,2693 | 0,006209 |
| TcCLB.509753.60  | mucin-associated surface protein (MASP), putative         | 0,2693 | 0,6601   |
| TcCLB.508175.189 | hypothetical protein, conserved                           | 0,2692 | 0,1234   |
| TcCLB.509293.10  | mucin TcMUCII, putative                                   | 0,2692 | 0,3616   |
| TcCLB.408485.20  | retrotransposon hot spot protein (RHS, pseudogene), putat | 0,2687 | 0,316    |
| TcCLB.508789.160 | mucin TcMUCII, putative                                   | 0,2686 | 0,7137   |
| TcCLB.508909.310 | hypothetical protein                                      | 0,2685 | 0,2572   |
| TcCLB.511603.160 | mucin-associated surface protein (MASP), putative         | 0,2684 | 0,5665   |
| TcCLB.506857.80  | kinesin, putative                                         | 0,2683 | 0,02195  |
| TcCLB.507675.39  | hypothetical protein, conserved                           | 0,2683 | 0,09376  |
| TcCLB.503427.9   | trans-sialidase, putative (fragment)                      | 0,2683 | 0,4339   |
| TcCLB.504881.14  | hypothetical protein, conserved                           | 0,2681 | 0,349    |
| TcCLB.509437.100 | retrotransposon hot spot protein (RHS, pseudogene), putat | 0,268  | 0,2134   |
| TcCLB.510005.50  | dispersed gene family protein 1 (DGF-1), putative         | 0,268  | 0,2554   |
| TcCLB.510359.80  | hypothetical protein                                      | 0,268  | 0,2637   |
| TcCLB.506055.40  | dispersed gene family protein 1 (DGF-1), putative         | 0,2678 | 0,2453   |
| TcCLB.506753.170 | ubiquinone biosynthesis protein-like protein, putative    | 0,2677 | 0,06014  |
| TcCLB.503399.29  | hydrolase-like protein                                    | 0,2677 | 0,2782   |
| TcCLB.511683.20  | hypothetical protein, conserved                           | 0,2676 | 0,08978  |
| TcCLB.508075.14  | hypothetical protein, conserved                           | 0,2675 | 0,07228  |
| TcCLB.503973.181 | surface protease GP63 (pseudogene), putative              | 0,2675 | 0,6815   |
| TcCLB.425311.9   | hypothetical protein, conserved (fragment)                | 0,2674 | 0,04271  |
| TcCLB.510567.10  | trans-sialidase, putative (fragment)                      | 0,2674 | 0,7654   |
| TcCLB.509799.100 | hypothetical protein, conserved                           | 0,2673 | 0,01872  |
| TcCLB.510759.130 | hypothetical protein, conserved                           | 0,2671 | 0,09702  |
| TcCLB.510833.20  | mucin-associated surface protein (MASP), putative         | 0,2671 | 0,461    |
| TcCLB.510807.40  | mucin TcMUCII, putative                                   | 0,2671 | 0,6851   |
| TcCLB.509693.140 | hypothetical protein, conserved                           | 0,267  | 0,016    |
| TcCLB.509721.20  | hypothetical protein, conserved                           | 0,2669 | 0,1085   |
| TcCLB.506525.70  | hypothetical protein, conserved                           | 0,2668 | 0,008508 |

|                  |                                                           |        |           |
|------------------|-----------------------------------------------------------|--------|-----------|
| TcCLB.506753.70  | hypothetical protein, conserved                           | 0,2668 | 0,1614    |
| TcCLB.509179.140 | myo-inositol-1(or 4)-monophosphatase 1, putative          | 0,2667 | 0,242     |
| TcCLB.506135.30  | hypothetical protein, conserved                           | 0,2666 | 0,08906   |
| TcCLB.507283.39  | trans-sialidase (pseudogene), putative                    | 0,2666 | 0,1076    |
| TcCLB.507873.34  | hypothetical protein, conserved                           | 0,2666 | 0,2965    |
| TcCLB.506559.110 | hypothetical protein                                      | 0,2665 | 0,04456   |
| TcCLB.507649.70  | nucleolar RNA-binding protein, putative                   | 0,2663 | 0,0006132 |
| TcCLB.509769.110 | Elongator-like Protein 3b, putative                       | 0,2663 | 0,0117    |
| TcCLB.503809.40  | protein kinase, putative                                  | 0,2662 | 0,1676    |
| TcCLB.508161.20  | trans-sialidase, Group V, putative                        | 0,2662 | 0,4999    |
| TcCLB.511819.14  | small nuclear ribonucleoprotein, putative                 | 0,2661 | 0,09912   |
| TcCLB.510307.110 | hypothetical protein, conserved (pseudogene)              | 0,266  | 0,01799   |
| TcCLB.511217.20  | Present in the outer mitochondrial membrane proteome 4:   | 0,266  | 0,05709   |
| TcCLB.506599.40  | hypothetical protein                                      | 0,266  | 0,7007    |
| TcCLB.509419.40  | trans-sialidase, Group V, putative                        | 0,266  | 0,8672    |
| TcCLB.506885.390 | AMP deaminase, putative                                   | 0,2659 | 0,02749   |
| TcCLB.508793.30  | palmitoyl acyltransferase 8, putative                     | 0,2658 | 0,272     |
| TcCLB.460111.10  | trans-sialidase, putative (fragment)                      | 0,2658 | 0,7353    |
| TcCLB.505071.130 | hypothetical protein, conserved                           | 0,2657 | 0,0545    |
| TcCLB.509965.270 | hypothetical protein, conserved                           | 0,2655 | 0,03499   |
| TcCLB.505939.50  | hypothetical protein                                      | 0,2655 | 0,1019    |
| TcCLB.509833.10  | hypothetical protein, conserved                           | 0,2655 | 0,1893    |
| TcCLB.511665.110 | glycine dehydrogenase [decarboxylating] (pseudogene), pu  | 0,2655 | 0,3152    |
| TcCLB.511903.110 | 40S ribosomal protein S8, putative                        | 0,2654 | 0,0006868 |
| TcCLB.509455.100 | hypothetical protein, conserved                           | 0,2654 | 0,02273   |
| TcCLB.510513.80  | bilobe protein, conserved                                 | 0,2653 | 0,02903   |
| TcCLB.503531.40  | hypothetical protein, conserved                           | 0,2652 | 0,2234    |
| TcCLB.504737.10  | trans-sialidase (pseudogene), putative                    | 0,2651 | 0,5525    |
| TcCLB.510715.100 | mucin-associated surface protein (MASP, pseudogene), pu   | 0,265  | 0,5683    |
| TcCLB.508265.110 | hypothetical protein, conserved                           | 0,2648 | 0,01361   |
| TcCLB.508081.70  | mucin-associated surface protein (MASP), putative         | 0,2648 | 0,6269    |
| TcCLB.509085.20  | retrotransposon hot spot protein (RHS, pseudogene), putat | 0,2646 | 0,687     |
| TcCLB.506943.80  | hypothetical protein, conserved                           | 0,2644 | 0,006354  |
| TcCLB.506303.130 | hypothetical protein, conserved                           | 0,2643 | 0,02097   |
| TcCLB.510407.70  | hypothetical protein                                      | 0,2642 | 0,07916   |
| TcCLB.509631.140 | flagellar attachment zone protein, putative (FAZ1)        | 0,2641 | 0,005517  |
| TcCLB.472777.20  | hypothetical protein, conserved                           | 0,2641 | 0,0462    |
| TcCLB.509937.210 | hypothetical protein, conserved                           | 0,2639 | 0,03582   |
| TcCLB.507519.170 | hypothetical protein, conserved                           | 0,2638 | 0,08196   |
| TcCLB.509991.9   | protein kinase, putative                                  | 0,2638 | 0,2348    |
| TcCLB.471403.9   | dispersed gene family protein 1 (DGF-1), putative (fragme | 0,2635 | 0,1364    |
| TcCLB.509683.50  | calmodulin, putative                                      | 0,2632 | 0,1613    |
| TcCLB.510001.59  | hypothetical protein, conserved (fragment)                | 0,263  | 0,01286   |
| TcCLB.503675.40  | hypothetical protein, conserved                           | 0,2629 | 0,07153   |
| TcCLB.509599.60  | hypothetical protein                                      | 0,2628 | 0,07506   |

|                  |                                                               |        |           |
|------------------|---------------------------------------------------------------|--------|-----------|
| TcCLB.510973.30  | 40S ribosomal protein S13, putative                           | 0,2626 | 0,0004636 |
| TcCLB.510879.50  | regulatory subunit of protein kinase a-like protein, putative | 0,2626 | 0,002694  |
| TcCLB.509767.220 | hypothetical protein, conserved                               | 0,2625 | 0,01514   |
| TcCLB.504635.20  | hypothetical protein, conserved                               | 0,2624 | 0,1364    |
| TcCLB.507897.2   | hypothetical protein, conserved                               | 0,2624 | 0,1468    |
| TcCLB.510697.130 | mucin-associated surface protein (MASP), putative             | 0,2624 | 0,6223    |
| TcCLB.510359.260 | mitochondrial import inner membrane translocase subunit       | 0,2622 | 0,08182   |
| TcCLB.508325.340 | glycine dehydrogenase [decarboxylating] (pseudogene), pu      | 0,2622 | 0,08343   |
| TcCLB.506733.130 | hypothetical protein, conserved                               | 0,262  | 0,02379   |
| TcCLB.509669.75  | hypothetical protein                                          | 0,262  | 0,1656    |
| TcCLB.511027.20  | hypothetical protein, conserved                               | 0,2618 | 0,09514   |
| TcCLB.503973.320 | mucin TcMUCII, putative                                       | 0,2616 | 0,7457    |
| TcCLB.511735.40  | hypothetical protein, conserved                               | 0,2614 | 0,2565    |
| TcCLB.511173.64  | mucin-associated surface protein (MASP), putative             | 0,2613 | 0,7972    |
| TcCLB.509461.60  | mitochondrial RNA binding protein, putative                   | 0,2612 | 0,005054  |
| TcCLB.509505.20  | hypothetical protein, conserved                               | 0,2612 | 0,04554   |
| TcCLB.504213.50  | hypothetical protein, conserved                               | 0,2611 | 0,2218    |
| TcCLB.509937.20  | hypothetical protein, conserved                               | 0,2606 | 0,002881  |
| TcCLB.508723.59  | hypothetical protein, conserved                               | 0,2604 | 0,1029    |
| TcCLB.510921.30  | mucin-associated surface protein (MASP), putative             | 0,2602 | 0,5383    |
| TcCLB.507959.140 | mucin TcMUCII, putative                                       | 0,2602 | 0,8251    |
| TcCLB.507053.60  | hypothetical protein, conserved                               | 0,2599 | 0,02414   |
| TcCLB.506559.290 | hypothetical protein, conserved                               | 0,2597 | 0,02659   |
| TcCLB.507711.250 | hypothetical protein, conserved                               | 0,2597 | 0,02879   |
| TcCLB.511115.30  | hypothetical protein, conserved                               | 0,2596 | 0,05187   |
| TcCLB.507041.100 | ATP-dependent protease binding subunit (pseudogene), pu       | 0,2596 | 0,08462   |
| TcCLB.510659.110 | hypothetical protein, conserved                               | 0,2595 | 0,04308   |
| TcCLB.507035.20  | retrotransposon hot spot protein (RHS, pseudogene), putat     | 0,2595 | 0,06361   |
| TcCLB.506667.110 | trans-sialidase (pseudogene), putative                        | 0,2594 | 0,4177    |
| TcCLB.506339.40  | mucin-associated surface protein (MASP), putative             | 0,259  | 0,5998    |
| TcCLB.508465.130 | hypothetical protein, conserved                               | 0,2587 | 0,03056   |
| TcCLB.479721.10  | hypothetical protein, conserved (pseudogene)                  | 0,2584 | 0,6654    |
| TcCLB.509419.90  | trans-sialidase, Group V, putative                            | 0,2583 | 0,8011    |
| TcCLB.508637.66  | hypothetical protein, conserved                               | 0,2582 | 0,09921   |
| TcCLB.509157.170 | trans-sialidase, Group VIII, putative                         | 0,2581 | 0,7477    |
| TcCLB.510531.10  | hypothetical protein, conserved                               | 0,2578 | 0,01136   |
| TcCLB.506435.190 | hypothetical protein, conserved                               | 0,2578 | 0,1977    |
| TcCLB.509211.39  | hypothetical protein, conserved (fragment)                    | 0,2577 | 0,09824   |
| TcCLB.509965.20  | hypothetical protein                                          | 0,2576 | 0,1457    |
| TcCLB.508175.264 | hypothetical protein, conserved (pseudogene)                  | 0,2576 | 0,2438    |
| TcCLB.506227.200 | hypothetical protein                                          | 0,2574 | 0,06842   |
| TcCLB.506245.270 | mucin-associated surface protein (MASP), putative             | 0,2574 | 0,5213    |
| TcCLB.510025.180 | mucin-associated surface protein (MASP), putative             | 0,2574 | 0,5284    |
| TcCLB.510647.10  | hypothetical protein, conserved                               | 0,2572 | 0,1933    |
| TcCLB.423707.10  | trans-sialidase, putative (fragment)                          | 0,2572 | 0,652     |

|                  |                                                           |        |          |
|------------------|-----------------------------------------------------------|--------|----------|
| TcCLB.509733.95  | hypothetical protein                                      | 0,2571 | 0,05694  |
| TcCLB.511649.30  | hypothetical protein, conserved                           | 0,2566 | 0,1012   |
| TcCLB.508519.20  | retrotransposon hot spot protein (RHS, pseudogene), putat | 0,2565 | 0,08039  |
| TcCLB.506599.330 | mucin-associated surface protein (MASP), putative         | 0,2565 | 0,4696   |
| TcCLB.510241.70  | heat shock protein, putative                              | 0,2564 | 0,1184   |
| TcCLB.508389.160 | trans-sialidase (pseudogene), putative                    | 0,2564 | 0,4626   |
| TcCLB.509971.90  | trans-sialidase, putative (fragment)                      | 0,2563 | 0,5982   |
| TcCLB.508999.127 | mucin-associated surface protein (MASP, pseudogene), pu   | 0,2563 | 0,6015   |
| TcCLB.510661.110 | Present in the outer mitochondrial membrane proteome 7    | 0,2562 | 0,02634  |
| TcCLB.510729.60  | hypothetical protein, conserved                           | 0,256  | 0,2808   |
| TcCLB.508515.30  | RNA-binding protein 38, putative (RBP38)                  | 0,2559 | 0,001136 |
| TcCLB.503685.20  | hypothetical protein, conserved                           | 0,2559 | 0,17     |
| TcCLB.511345.30  | trans-sialidase (pseudogene), putative                    | 0,2559 | 0,2515   |
| TcCLB.506247.180 | hypothetical protein, conserved                           | 0,2558 | 0,01646  |
| TcCLB.444777.20  | hypothetical protein, conserved                           | 0,2558 | 0,07484  |
| TcCLB.510999.19  | hypothetical protein, conserved                           | 0,2558 | 0,1877   |
| TcCLB.508527.20  | retrotransposon hot spot protein (RHS, pseudogene), putat | 0,2557 | 0,01187  |
| TcCLB.508637.10  | trans-sialidase, Group III, putative                      | 0,2557 | 0,5744   |
| TcCLB.508029.50  | kinesin-like protein, putative                            | 0,2556 | 0,176    |
| TcCLB.506961.40  | retrotransposon hot spot protein (RHS, pseudogene), putat | 0,2555 | 0,0344   |
| TcCLB.506559.50  | hypothetical protein, conserved                           | 0,2553 | 0,04449  |
| TcCLB.506493.100 | hypothetical protein, conserved                           | 0,2553 | 0,1227   |
| TcCLB.509999.10  | hypothetical protein, conserved                           | 0,2551 | 0,1138   |
| TcCLB.508193.15  | trans-sialidase (pseudogene), putative                    | 0,255  | 0,02815  |
| TcCLB.506579.40  | hypothetical protein, conserved                           | 0,2548 | 0,001576 |
| TcCLB.511849.50  | surface protease GP63 (pseudogene), putative              | 0,2548 | 0,2158   |
| TcCLB.442383.9   | 40S ribosomal protein SA, putative                        | 0,2547 | 0,01082  |
| TcCLB.510719.230 | hypothetical protein, conserved                           | 0,2547 | 0,02894  |
| TcCLB.503823.90  | hypothetical protein, conserved                           | 0,2547 | 0,04917  |
| TcCLB.508245.40  | mucin-associated surface protein (MASP), putative         | 0,2547 | 0,5272   |
| TcCLB.506941.139 | zinc finger protein, putative                             | 0,2546 | 0,03654  |
| TcCLB.506393.90  | dispersed gene family protein 1 (DGF-1), putative         | 0,2546 | 0,113    |
| TcCLB.510885.100 | hypothetical protein, conserved                           | 0,2545 | 0,1067   |
| TcCLB.508521.70  | mucin-associated surface protein (MASP, pseudogene), pu   | 0,2545 | 0,3671   |
| TcCLB.511871.20  | hypothetical protein, conserved                           | 0,2543 | 0,09672  |
| TcCLB.509429.10  | trans-sialidase (pseudogene), putative                    | 0,2543 | 0,2225   |
| TcCLB.511089.19  | mucin-associated surface protein (MASP), putative         | 0,2542 | 0,7086   |
| TcCLB.506477.14  | hypothetical protein, conserved                           | 0,254  | 0,1368   |
| TcCLB.507681.40  | hypothetical protein                                      | 0,2539 | 0,06199  |
| TcCLB.508175.30  | hypothetical protein, conserved                           | 0,2539 | 0,1592   |
| TcCLB.507915.5   | glutaminyl-tRNA synthetase, putative                      | 0,2539 | 0,626    |
| TcCLB.504587.10  | surface protease GP63 (pseudogene), putative              | 0,2538 | 0,5562   |
| TcCLB.509999.20  | hypothetical protein, conserved                           | 0,2537 | 0,09408  |
| TcCLB.507551.9   | dispersed gene family protein 1 (DGF-1), putative         | 0,2537 | 0,1032   |
| TcCLB.511733.70  | hypothetical protein, conserved                           | 0,2536 | 0,1916   |

|                  |                                                           |        |          |
|------------------|-----------------------------------------------------------|--------|----------|
| TcCLB.508397.79  | hypothetical protein, conserved                           | 0,2536 | 0,4563   |
| TcCLB.511577.170 | hypothetical protein, conserved (pseudogene)              | 0,2535 | 0,09297  |
| TcCLB.507899.5   | trans-sialidase (pseudogene), putative                    | 0,2533 | 0,09291  |
| TcCLB.507467.104 | hypothetical protein, conserved                           | 0,2533 | 0,2851   |
| TcCLB.511267.20  | hypothetical protein, conserved                           | 0,2533 | 0,338    |
| TcCLB.506597.30  | mucin TcMUCII, putative                                   | 0,2533 | 0,7161   |
| TcCLB.503409.10  | hypothetical protein, conserved                           | 0,2531 | 0,1739   |
| TcCLB.504069.4   | hypothetical protein, conserved (fragment)                | 0,2529 | 0,1509   |
| TcCLB.510247.20  | casein kinase I, putative                                 | 0,2529 | 0,4795   |
| TcCLB.509791.30  | hypothetical protein, conserved                           | 0,2527 | 0,02743  |
| TcCLB.506227.170 | hypothetical protein, conserved                           | 0,2526 | 0,1912   |
| TcCLB.511255.430 | trans-sialidase (pseudogene), putative                    | 0,2524 | 0,5393   |
| TcCLB.509777.64  | ADG1-like protein, putative                               | 0,2523 | 0,1887   |
| TcCLB.510761.44  | cyclophilin-like protein, putative                        | 0,2522 | 0,008382 |
| TcCLB.479883.10  | hypothetical protein, conserved                           | 0,2521 | 0,1858   |
| TcCLB.506267.10  | mucin-associated surface protein (MASP), putative         | 0,2519 | 0,765    |
| TcCLB.510797.20  | hypothetical protein, conserved                           | 0,2517 | 0,2144   |
| TcCLB.503525.10  | hypothetical protein, conserved                           | 0,2516 | 0,07529  |
| TcCLB.511755.24  | hypothetical protein, conserved (pseudogene)              | 0,2515 | 0,2594   |
| TcCLB.510465.24  | mucin-associated surface protein (MASP, pseudogene), pu   | 0,2515 | 0,7651   |
| TcCLB.510359.330 | hypothetical protein, conserved                           | 0,2512 | 0,04599  |
| TcCLB.509919.9   | dispersed gene family protein 1 (DGF-1), putative (fragme | 0,2512 | 0,1725   |
| TcCLB.509047.14  | hypothetical protein, conserved                           | 0,2511 | 0,1418   |
| TcCLB.506129.80  | retrotransposon hot spot protein (RHS, pseudogene), putat | 0,251  | 0,1418   |
| TcCLB.503913.29  | hypothetical protein, conserved                           | 0,251  | 0,3865   |
| TcCLB.508433.210 | mucin TcMUCII (pseudogene), putative                      | 0,2509 | 0,6334   |
| TcCLB.507517.40  | hypothetical protein, conserved                           | 0,2507 | 0,0196   |
| TcCLB.504817.20  | hypothetical protein, conserved                           | 0,2507 | 0,09529  |
| TcCLB.508837.170 | hypothetical protein, conserved                           | 0,2506 | 0,03239  |
| TcCLB.508277.100 | cAMP specific phosphodiesterase, putative                 | 0,2506 | 0,1319   |
| TcCLB.508197.39  | 60S ribosomal protein L11, putative                       | 0,2503 | 0,06323  |
| TcCLB.510377.370 | mucin TcMUCII, putative                                   | 0,2503 | 0,6106   |
| TcCLB.510265.80  | hypothetical protein, conserved                           | 0,2502 | 0,04108  |
| TcCLB.509455.40  | hypothetical protein, conserved                           | 0,2502 | 0,08247  |
| TcCLB.504131.60  | hypothetical protein, conserved                           | 0,2501 | 0,06003  |
| TcCLB.506685.30  | thymidylate kinase, putative                              | 0,2501 | 0,139    |
| TcCLB.507637.170 | surface protease GP63, putative                           | 0,2501 | 0,4106   |
| TcCLB.511289.70  | Mitochondrial ADP/ATP carrier protein 5, putative (MCP5)  | 0,25   | 0,004926 |
| TcCLB.508213.49  | hypothetical protein, conserved                           | 0,25   | 0,277    |
| TcCLB.509717.60  | metallo-peptidase, Clan MA(E) Family M41                  | 0,2497 | 0,02427  |
| TcCLB.504085.50  | ATP-dependent DEAD/H RNA helicase, putative               | 0,2497 | 0,05511  |
| TcCLB.506045.11  | retrotransposon hot spot protein (RHS, pseudogene), putat | 0,2497 | 0,2219   |
| TcCLB.503397.10  | retrotransposon hot spot protein (RHS, pseudogene), putat | 0,2496 | 0,04848  |
| TcCLB.510391.30  | mucin TcMUCII, putative                                   | 0,2496 | 0,6098   |
| TcCLB.511697.40  | hypothetical protein, conserved (pseudogene)              | 0,2494 | 0,2154   |

|                  |                                                             |        |          |
|------------------|-------------------------------------------------------------|--------|----------|
| TcCLB.511367.170 | vacuolar protein sorting-associated protein 35, putative    | 0,2493 | 0,004168 |
| TcCLB.511307.3   | membrane transporter protein, putative (fragment)           | 0,2492 | 0,2004   |
| TcCLB.510611.30  | kinesin, putative                                           | 0,2491 | 0,02491  |
| TcCLB.511797.110 | trans-sialidase, Group V, putative                          | 0,249  | 0,3843   |
| TcCLB.510355.200 | hypothetical protein, conserved                             | 0,2489 | 0,1486   |
| TcCLB.510689.80  | hypothetical protein, conserved                             | 0,2488 | 0,2115   |
| TcCLB.506955.244 | mucin-associated surface protein (MASP), putative           | 0,2488 | 0,5471   |
| TcCLB.506529.400 | hypothetical protein, conserved                             | 0,2487 | 0,1516   |
| TcCLB.511211.240 | hypothetical protein, conserved                             | 0,2487 | 0,1608   |
| TcCLB.508429.10  | hypothetical protein                                        | 0,2487 | 0,5892   |
| TcCLB.509977.61  | surface protease GP63 (pseudogene), putative                | 0,2486 | 0,3202   |
| TcCLB.504153.340 | hypothetical protein, conserved                             | 0,2482 | 0,04479  |
| TcCLB.509979.281 | elongation factor 1-gamma (EF-1-gamma, pseudogene), p       | 0,2481 | 0,3819   |
| TcCLB.508999.134 | mucin TcMUCII, putative                                     | 0,248  | 0,6511   |
| TcCLB.504017.10  | Nascent polypeptide-associated complex subunit beta, put    | 0,2478 | 0,03016  |
| TcCLB.506649.60  | hypothetical protein, conserved                             | 0,2477 | 0,04007  |
| TcCLB.503995.10  | Present in the outer mitochondrial membrane proteome 1'     | 0,2476 | 0,1611   |
| TcCLB.510693.260 | trans-sialidase (pseudogene), putative                      | 0,2476 | 0,596    |
| TcCLB.510099.50  | hypothetical protein, conserved                             | 0,2475 | 0,08465  |
| TcCLB.504087.10  | hypothetical protein, conserved                             | 0,2475 | 0,5078   |
| TcCLB.510363.80  | mucin-associated surface protein (MASP), putative           | 0,2475 | 0,7462   |
| TcCLB.510285.60  | ubiquinone biosynthesis methyltransferase, putative         | 0,2474 | 0,03744  |
| TcCLB.510431.140 | dual-specificity protein kinase, putative                   | 0,2473 | 0,02455  |
| TcCLB.504137.50  | hypothetical protein, conserved                             | 0,2472 | 0,1558   |
| TcCLB.506559.420 | dolichyl-P-Man:GDP-Man1GlcNAc2-PP-dolichyl alpha-1,3-n      | 0,2471 | 0,001976 |
| TcCLB.511253.31  | kinesin-like protein, putative (fragment)                   | 0,2471 | 0,6453   |
| TcCLB.510877.190 | hypothetical protein, conserved                             | 0,247  | 0,3746   |
| TcCLB.509231.26  | hypothetical protein, conserved                             | 0,2468 | 0,07584  |
| TcCLB.509749.10  | Biotin--acetyl-CoA-carboxylase ligase, putative             | 0,2468 | 0,08195  |
| TcCLB.509777.10  | hypothetical protein                                        | 0,2468 | 0,4767   |
| TcCLB.509897.124 | mucin-associated surface protein (MASP, pseudogene), pu     | 0,2467 | 0,4222   |
| TcCLB.507993.280 | hypothetical protein, conserved                             | 0,2466 | 0,0253   |
| TcCLB.504175.20  | hypothetical protein, conserved                             | 0,2466 | 0,1836   |
| TcCLB.510129.20  | surface glycoprotein, putative                              | 0,2465 | 0,04258  |
| TcCLB.507007.76  | receptor protein kinase, putative                           | 0,2465 | 0,2118   |
| TcCLB.506525.120 | hypothetical protein, conserved                             | 0,2465 | 0,3742   |
| TcCLB.508523.80  | cAMP response protein 1 (CARP1)                             | 0,2461 | 0,1455   |
| TcCLB.510239.70  | mucin-associated surface protein (MASP), putative           | 0,246  | 0,5489   |
| TcCLB.506309.140 | mucin-associated surface protein (MASP), putative           | 0,2458 | 0,8266   |
| TcCLB.510291.20  | hypothetical protein, conserved                             | 0,2457 | 0,1058   |
| TcCLB.508153.490 | peptidyl-prolyl cis-trans isomerase NIMA-interacting 4, put | 0,2457 | 0,3091   |
| TcCLB.503789.20  | hypothetical protein, conserved                             | 0,2456 | 0,03384  |
| TcCLB.506203.25  | hypothetical protein                                        | 0,2456 | 0,06537  |
| TcCLB.506939.180 | mucin-associated surface protein (MASP), putative           | 0,2456 | 0,4563   |
| TcCLB.508247.50  | mucin-associated surface protein (MASP, pseudogene), pu     | 0,2456 | 0,6318   |

|                  |                                                           |        |          |
|------------------|-----------------------------------------------------------|--------|----------|
| TcCLB.506727.110 | hypothetical protein, conserved                           | 0,2455 | 0,06178  |
| TcCLB.508781.70  | palmitoyl acyltransferase 3, putative                     | 0,2454 | 0,07549  |
| TcCLB.509595.44  | hypothetical protein, conserved                           | 0,2454 | 0,1751   |
| TcCLB.511771.171 | hypothetical protein                                      | 0,2454 | 0,5365   |
| TcCLB.510889.190 | hypothetical protein, conserved                           | 0,2453 | 0,07782  |
| TcCLB.503999.10  | squalene monooxygenase, putative                          | 0,245  | 0,01399  |
| TcCLB.421057.10  | adrenodoxin precursor, putative                           | 0,2449 | 0,2927   |
| TcCLB.510165.110 | retrotransposon hot spot (RHS) protein, putative          | 0,2448 | 0,1856   |
| TcCLB.504105.87  | hypothetical protein, conserved                           | 0,2445 | 0,2051   |
| TcCLB.506581.4   | hypothetical protein, conserved                           | 0,2445 | 0,5329   |
| TcCLB.507803.30  | hypothetical protein                                      | 0,2444 | 0,07218  |
| TcCLB.508385.40  | dual specificity protein phosphatase, putative            | 0,2444 | 0,137    |
| TcCLB.508673.20  | UDP-Gal or UDP-GlcNAc-dependent glycosyltransferase, p    | 0,2444 | 0,2441   |
| TcCLB.506223.80  | Metalloprotease M41 FtsH, putative                        | 0,2443 | 0,02247  |
| TcCLB.509429.270 | proteasome regulatory ATPase subunit 3, putative          | 0,2442 | 0,01527  |
| TcCLB.508529.40  | trans-sialidase (pseudogene), putative                    | 0,2442 | 0,1078   |
| TcCLB.508187.20  | hypothetical protein (pseudogene)                         | 0,2442 | 0,3957   |
| TcCLB.503827.5   | mucin-associated surface protein (MASP), putative         | 0,2442 | 0,781    |
| TcCLB.506705.50  | hypothetical protein                                      | 0,2441 | 0,02614  |
| TcCLB.510101.160 | hypothetical protein, conserved                           | 0,2441 | 0,1765   |
| TcCLB.511587.75  | hypothetical protein                                      | 0,2438 | 0,5879   |
| TcCLB.511569.14  | dispersed gene family protein 1 (DGF-1), putative         | 0,2437 | 0,2782   |
| TcCLB.503669.10  | hypothetical protein, conserved                           | 0,2436 | 0,02949  |
| TcCLB.509221.50  | trans-sialidase (pseudogene), putative                    | 0,2436 | 0,2831   |
| TcCLB.506871.40  | hypothetical protein, conserved                           | 0,2434 | 0,06523  |
| TcCLB.510943.206 | trans-sialidase, putative                                 | 0,2434 | 0,8227   |
| TcCLB.508881.140 | hypothetical protein                                      | 0,2433 | 0,03547  |
| TcCLB.508573.39  | dispersed gene family protein 1 (DGF-1), putative         | 0,2433 | 0,2756   |
| TcCLB.506157.40  | trans-sialidase, putative                                 | 0,2432 | 0,5283   |
| TcCLB.507709.50  | 60S ribosomal protein L6, putative                        | 0,2428 | 0,004541 |
| TcCLB.507483.50  | calmodulin (CALA2)                                        | 0,2427 | 0,3425   |
| TcCLB.476725.9   | dispersed gene family protein 1 (DGF-1), putative (fragme | 0,2427 | 0,4398   |
| TcCLB.508047.70  | mucin-associated surface protein (MASP), putative         | 0,2427 | 0,469    |
| TcCLB.508441.50  | hypothetical protein, conserved                           | 0,2426 | 0,327    |
| TcCLB.507049.140 | hypothetical protein, conserved                           | 0,2425 | 0,03021  |
| TcCLB.505807.220 | ribosomal RNA adenine dimethylase family protein, putati  | 0,2424 | 0,04767  |
| TcCLB.506635.40  | hypothetical protein, conserved                           | 0,2424 | 0,09126  |
| TcCLB.506417.20  | hypothetical protein, conserved                           | 0,2424 | 0,3951   |
| TcCLB.506777.60  | NGG1 interacting factor 3, putative                       | 0,2422 | 0,2183   |
| TcCLB.510289.44  | hypothetical protein, conserved                           | 0,2422 | 0,2754   |
| TcCLB.506599.400 | trans-sialidase (pseudogene), putative                    | 0,2422 | 0,7362   |
| TcCLB.511285.100 | hypothetical protein                                      | 0,2421 | 0,05645  |
| TcCLB.509805.140 | hypothetical protein                                      | 0,2421 | 0,09147  |
| TcCLB.510165.20  | DNA repair protein, putative                              | 0,2421 | 0,09413  |
| TcCLB.511071.171 | 60S ribosomal protein L12, putative                       | 0,2419 | 0,001256 |

|                  |                                                           |        |          |
|------------------|-----------------------------------------------------------|--------|----------|
| TcCLB.509365.50  | hypothetical protein, conserved                           | 0,2419 | 0,6253   |
| TcCLB.507081.80  | hypothetical protein, conserved                           | 0,2418 | 0,05437  |
| TcCLB.506619.49  | ras-related protein Rab21, putative                       | 0,2418 | 0,075    |
| TcCLB.511181.20  | hypothetical protein, conserved                           | 0,2417 | 0,07569  |
| TcCLB.507521.44  | hypothetical protein, conserved                           | 0,2416 | 0,3326   |
| TcCLB.510879.210 | hypothetical protein, conserved                           | 0,2415 | 0,1281   |
| TcCLB.507071.180 | mucin-associated surface protein (MASP), putative         | 0,2414 | 0,4916   |
| TcCLB.507791.20  | N-acetyltransferase complex ARD1 subunit (pseudogene),    | 0,2413 | 0,5838   |
| TcCLB.506945.10  | hypothetical protein, conserved                           | 0,241  | 0,2166   |
| TcCLB.506949.30  | hypothetical protein, conserved                           | 0,2409 | 0,5008   |
| TcCLB.509835.10  | hypothetical protein, conserved                           | 0,2408 | 0,5685   |
| TcCLB.505949.169 | mucin-associated surface protein (MASP), putative (fragm  | 0,2408 | 0,7373   |
| TcCLB.511391.110 | histone-lysine N-methyltransferase, putative (DOT1A)      | 0,2406 | 0,03114  |
| TcCLB.506413.40  | hypothetical protein, conserved                           | 0,2405 | 0,224    |
| TcCLB.509819.30  | septum formation inhibitor, Maf-like protein, putative    | 0,2402 | 0,2123   |
| TcCLB.505965.50  | phosphonopyruvate decarboxylase, putative                 | 0,2401 | 0,0506   |
| TcCLB.510621.30  | mucin TcMUCII, putative                                   | 0,2401 | 0,7334   |
| TcCLB.506727.50  | hypothetical protein, conserved                           | 0,2399 | 0,04873  |
| TcCLB.508487.20  | dispersed gene family protein 1 (DGF-1, pseudogene), puta | 0,2399 | 0,3491   |
| TcCLB.504061.10  | retrotransposon hot spot protein (RHS, pseudogene), putat | 0,2398 | 0,0887   |
| TcCLB.510089.160 | hypothetical protein, conserved (pseudogene)              | 0,2395 | 0,0147   |
| TcCLB.508461.60  | synaptojanin (N-terminal domain), putative                | 0,2393 | 0,06929  |
| TcCLB.508461.100 | Bardet-Biedl syndrome 1 protein homolog (BBS1-like prote  | 0,2393 | 0,06973  |
| TcCLB.507809.110 | hypothetical protein, conserved                           | 0,239  | 0,04097  |
| TcCLB.511305.40  | hypothetical protein, conserved                           | 0,239  | 0,2086   |
| TcCLB.511595.30  | mucin-associated surface protein (MASP), putative         | 0,2389 | 0,6017   |
| TcCLB.508707.100 | hypothetical protein, conserved                           | 0,2387 | 0,0259   |
| TcCLB.503757.30  | hypothetical protein, conserved                           | 0,2386 | 0,1499   |
| TcCLB.506635.10  | hypothetical protein (pseudogene)                         | 0,2386 | 0,2814   |
| TcCLB.511173.309 | mucin-associated surface protein (MASP, pseudogene), pu   | 0,2385 | 0,6935   |
| TcCLB.508175.230 | hypothetical protein, conserved                           | 0,2383 | 0,06995  |
| TcCLB.510543.80  | hypothetical protein                                      | 0,2382 | 0,5133   |
| TcCLB.508445.90  | hypothetical protein, conserved                           | 0,2381 | 0,08312  |
| TcCLB.508181.124 | hypothetical protein, conserved                           | 0,2379 | 0,08668  |
| TcCLB.511135.20  | hypothetical protein, conserved                           | 0,2378 | 0,005842 |
| TcCLB.511907.320 | hypothetical protein, conserved                           | 0,2378 | 0,07059  |
| TcCLB.509903.10  | dispersed gene family protein 1 (DGF-1, pseudogene), puta | 0,2378 | 0,1413   |
| TcCLB.511245.240 | serine/threonine protein kinase, putative                 | 0,2378 | 0,2706   |
| TcCLB.508479.500 | retrotransposon hot spot (RHS) protein, putative          | 0,2377 | 0,0181   |
| TcCLB.509251.30  | trans-sialidase (pseudogene), putative                    | 0,2377 | 0,3885   |
| TcCLB.506155.20  | hypothetical protein, conserved                           | 0,2376 | 0,0502   |
| TcCLB.511729.9   | calmodulin, putative                                      | 0,2375 | 0,2756   |
| TcCLB.506767.10  | hypothetical protein, conserved (pseudogene)              | 0,2374 | 0,7212   |
| TcCLB.511661.60  | hypothetical protein, conserved                           | 0,2373 | 0,1094   |
| TcCLB.509769.130 | DNA polymerase zeta catalytic subunit, putative           | 0,2372 | 0,004931 |



|                  |                                                            |        |          |
|------------------|------------------------------------------------------------|--------|----------|
| TcCLB.503899.50  | RNA-editing complex protein MP100, putative                | 0,2372 | 0,02714  |
| TcCLB.433061.10  | hypothetical protein                                       | 0,2372 | 0,7219   |
| TcCLB.506721.20  | radial spoke protein 3, putative (RSP3)                    | 0,2371 | 0,04915  |
| TcCLB.506047.10  | hypothetical protein, conserved (pseudogene)               | 0,237  | 0,4399   |
| TcCLB.509993.31  | mucin-associated surface protein (MASP, pseudogene), pu    | 0,2369 | 0,5482   |
| TcCLB.506799.130 | mucin-associated surface protein (MASP), putative          | 0,2368 | 0,3505   |
| TcCLB.508789.120 | trans-sialidase, Group VI, putative                        | 0,2368 | 0,4554   |
| TcCLB.508165.185 | mucin TcMUCII (pseudogene), putative                       | 0,2368 | 0,8348   |
| TcCLB.509913.10  | 3-methylcrotonyl-CoA carboxylase, putative                 | 0,2367 | 0,05903  |
| TcCLB.405179.10  | dynein heavy chain, putative (fragment)                    | 0,2367 | 0,1918   |
| TcCLB.503491.29  | surface protease GP63 (pseudogene), putative               | 0,2366 | 0,7236   |
| TcCLB.508325.90  | hypothetical protein                                       | 0,2365 | 0,4709   |
| TcCLB.510213.80  | mucin TcMUCII, putative                                    | 0,2365 | 0,7163   |
| TcCLB.510279.240 | hypothetical protein                                       | 0,2364 | 0,4653   |
| TcCLB.508411.40  | hypothetical protein, conserved                            | 0,2363 | 0,0993   |
| TcCLB.506247.380 | hypothetical protein, conserved                            | 0,2362 | 0,09435  |
| TcCLB.508523.10  | retrotransposon hot spot protein (RHS, pseudogene), putat  | 0,2362 | 0,209    |
| TcCLB.509047.10  | hypothetical protein                                       | 0,2361 | 0,07059  |
| TcCLB.509025.29  | DNA photolyase, putative                                   | 0,236  | 0,2288   |
| TcCLB.509701.10  | trifunctional enzyme alpha subunit, mitochondrial precursc | 0,2359 | 0,02497  |
| TcCLB.507927.90  | hypothetical protein, conserved                            | 0,2359 | 0,2462   |
| TcCLB.507623.110 | surface protease GP63, putative                            | 0,2358 | 0,09513  |
| TcCLB.511021.70  | ABC transporter of the mitochondrion, putative             | 0,2357 | 0,07915  |
| TcCLB.510065.60  | hypothetical protein, conserved                            | 0,2357 | 0,223    |
| TcCLB.506133.130 | trans-sialidase, Group V, putative                         | 0,2356 | 0,5414   |
| TcCLB.503717.130 | trans-sialidase (pseudogene), putative                     | 0,2356 | 0,578    |
| TcCLB.509229.40  | hypothetical protein, conserved                            | 0,2355 | 0,04032  |
| TcCLB.507179.20  | dispersed gene family protein 1 (DGF-1), putative          | 0,2355 | 0,1867   |
| TcCLB.508739.60  | histone H4, putative                                       | 0,2355 | 0,2454   |
| TcCLB.504099.40  | retrotransposon hot spot protein (RHS, pseudogene), putat  | 0,2355 | 0,4766   |
| TcCLB.508461.146 | hypothetical protein, conserved                            | 0,2354 | 0,08531  |
| TcCLB.506513.120 | hypothetical protein, conserved                            | 0,2353 | 0,08002  |
| TcCLB.508737.130 | hypothetical protein, conserved                            | 0,2353 | 0,247    |
| TcCLB.508457.30  | lipoic acid containing carrier protein, putative (GCVH)    | 0,2352 | 0,07619  |
| TcCLB.511571.49  | nucleoside phosphatase, putative                           | 0,2351 | 0,0109   |
| TcCLB.507515.80  | hypothetical protein, conserved                            | 0,2351 | 0,135    |
| TcCLB.503981.40  | DnaJ chaperone protein, putative                           | 0,235  | 0,007047 |
| TcCLB.506591.20  | U-box domain protein, putative                             | 0,235  | 0,02268  |
| TcCLB.508777.70  | hypothetical protein, conserved                            | 0,235  | 0,1507   |
| TcCLB.506839.30  | hypothetical protein, conserved                            | 0,2349 | 0,08761  |
| TcCLB.506067.300 | trans-sialidase, Group V, putative                         | 0,2349 | 0,3743   |
| TcCLB.510433.20  | surface protein TolT, putative                             | 0,2348 | 0,1468   |
| TcCLB.511545.110 | hypothetical protein                                       | 0,2347 | 0,2103   |
| TcCLB.473313.10  | mucin-associated surface protein (MASP), putative (fragm   | 0,2345 | 0,3626   |
| TcCLB.510015.10  | hypothetical protein                                       | 0,2345 | 0,6863   |

|                  |                                                           |        |          |
|------------------|-----------------------------------------------------------|--------|----------|
| TcCLB.506223.110 | hypothetical protein, conserved                           | 0,2344 | 0,04178  |
| TcCLB.506275.40  | hypothetical protein, conserved                           | 0,2343 | 0,07161  |
| TcCLB.508235.30  | mucin TcMUCI, putative                                    | 0,2343 | 0,3528   |
| TcCLB.510101.10  | protein transport protein Sec31, putative (pseudogene)    | 0,2342 | 0,1531   |
| TcCLB.511019.60  | hypothetical protein, conserved (pseudogene)              | 0,2342 | 0,1574   |
| TcCLB.511213.15  | mucin-associated surface protein (MASP), putative         | 0,2342 | 0,5384   |
| TcCLB.503891.54  | nucleolar RNA-binding protein, putative                   | 0,2341 | 0,1945   |
| TcCLB.508207.170 | hypothetical protein                                      | 0,234  | 0,07897  |
| TcCLB.510101.230 | ATPase (pseudogene), putative                             | 0,2339 | 0,01247  |
| TcCLB.510187.310 | hypothetical protein, conserved                           | 0,2338 | 0,04917  |
| TcCLB.508069.5   | trans-sialidase, putative (fragment)                      | 0,2338 | 0,5673   |
| TcCLB.503855.20  | spermidine synthase, putative                             | 0,2337 | 0,0304   |
| TcCLB.509721.70  | hypothetical protein, conserved                           | 0,2337 | 0,1531   |
| TcCLB.506445.10  | actin-like protein, putative                              | 0,2337 | 0,2225   |
| TcCLB.511015.10  | mannosyl-oligosaccharide glucosidase, putative            | 0,2336 | 0,226    |
| TcCLB.508211.40  | hypothetical protein, conserved                           | 0,2335 | 0,07213  |
| TcCLB.511887.45  | hypothetical protein, conserved (pseudogene)              | 0,2335 | 0,6873   |
| TcCLB.511509.30  | protein kinase, putative                                  | 0,2334 | 0,09087  |
| TcCLB.509753.310 | mucin-associated surface protein (MASP), putative         | 0,2334 | 0,5641   |
| TcCLB.503823.160 | ubiquinone biosynthesis methyltransferase, putative       | 0,2333 | 0,07978  |
| TcCLB.509979.110 | hypothetical protein, conserved                           | 0,2333 | 0,2051   |
| TcCLB.508479.5   | glycine dehydrogenase (pseudogene), putative              | 0,233  | 0,5378   |
| TcCLB.511771.199 | hypothetical protein                                      | 0,233  | 0,6969   |
| TcCLB.510663.30  | 60S ribosomal subunit protein L31, putative               | 0,2328 | 0,007546 |
| TcCLB.511903.40  | 3-hydroxy-3-methylglutaryl-CoA synthase, putative (HMGS)  | 0,2328 | 0,008888 |
| TcCLB.510407.40  | hypothetical protein, conserved                           | 0,2328 | 0,09448  |
| TcCLB.510749.60  | hypothetical protein, conserved                           | 0,2328 | 0,1545   |
| TcCLB.510609.90  | hypothetical protein, conserved                           | 0,2325 | 0,0486   |
| TcCLB.507513.40  | hypothetical protein, conserved                           | 0,2325 | 0,2575   |
| TcCLB.509167.160 | hypothetical protein                                      | 0,2322 | 0,04773  |
| TcCLB.507213.10  | hypothetical protein, conserved                           | 0,2321 | 0,04503  |
| TcCLB.508851.50  | hypothetical protein, conserved                           | 0,2321 | 0,09905  |
| TcCLB.508081.60  | hypothetical protein                                      | 0,2321 | 0,645    |
| TcCLB.507993.230 | hypothetical protein, conserved (pseudogene)              | 0,232  | 0,8206   |
| TcCLB.507035.70  | hypothetical protein                                      | 0,2319 | 0,3763   |
| TcCLB.506605.194 | hypothetical protein, conserved                           | 0,2318 | 0,1766   |
| TcCLB.508411.80  | hypothetical protein, conserved                           | 0,2316 | 0,1458   |
| TcCLB.503805.20  | hypothetical protein, conserved                           | 0,2316 | 0,1853   |
| TcCLB.508433.200 | trans-sialidase (pseudogene), putative                    | 0,2315 | 0,545    |
| TcCLB.506563.90  | calpain-like cysteine peptidase (pseudogene), putative    | 0,2313 | 0,2724   |
| TcCLB.482971.9   | dispersed gene family protein 1 (DGF-1), putative (fragme | 0,2313 | 0,6349   |
| TcCLB.511879.9   | hypothetical protein, conserved                           | 0,2311 | 0,05115  |
| TcCLB.510823.70  | 60S acidic ribosomal protein, putative                    | 0,2309 | 0,05512  |
| TcCLB.511451.80  | trans-sialidase, Group V, putative                        | 0,2307 | 0,2575   |
| TcCLB.507061.20  | ribosomal protein L2, putative                            | 0,2306 | 0,05626  |

|                  |                                                           |        |          |
|------------------|-----------------------------------------------------------|--------|----------|
| TcCLB.510303.290 | acyl-CoA dehydrogenase, putative                          | 0,2306 | 0,09538  |
| TcCLB.510595.40  | hypothetical protein, conserved                           | 0,2305 | 0,1589   |
| TcCLB.503643.3   | 60S ribosomal protein L4, putative (fragment)             | 0,2302 | 0,008832 |
| TcCLB.506885.420 | hypothetical protein                                      | 0,2301 | 0,2615   |
| TcCLB.510655.159 | hypothetical protein, conserved                           | 0,2301 | 0,4107   |
| TcCLB.508129.9   | adenosine monophosphate deaminase, putative (fragment)    | 0,2299 | 0,0953   |
| TcCLB.508917.40  | hypothetical protein, conserved                           | 0,2297 | 0,08887  |
| TcCLB.506435.100 | hypothetical protein, conserved                           | 0,2297 | 0,3066   |
| TcCLB.503829.40  | hypothetical protein, conserved                           | 0,2294 | 0,04146  |
| TcCLB.508711.20  | hypothetical protein, conserved                           | 0,2294 | 0,05869  |
| TcCLB.511389.70  | hypothetical protein, conserved                           | 0,2294 | 0,06891  |
| TcCLB.506471.50  | trans-sialidase (pseudogene), putative                    | 0,2293 | 0,1251   |
| TcCLB.511507.50  | mannosyltransferase, putative                             | 0,2293 | 0,1352   |
| TcCLB.511417.60  | hypothetical protein, conserved                           | 0,2293 | 0,1696   |
| TcCLB.509695.60  | hypothetical protein, conserved                           | 0,2293 | 0,1702   |
| TcCLB.510089.219 | diacylglycerol acyltransferase, putative                  | 0,2293 | 0,2329   |
| TcCLB.511663.19  | dispersed gene family protein 1 (DGF-1), putative (fragme | 0,2292 | 0,3818   |
| TcCLB.508347.20  | O-6 methyl-guanine alkyl transferase, putative            | 0,2291 | 0,2337   |
| TcCLB.503973.255 | hypothetical protein, conserved (pseudogene)              | 0,2291 | 0,679    |
| TcCLB.509867.70  | trans-sialidase, Group VI, putative                       | 0,229  | 0,6343   |
| TcCLB.506389.39  | elongation factor 1-gamma (EF-1-gamma, pseudogene), p     | 0,2289 | 0,0722   |
| TcCLB.506389.79  | calmodulin, putative                                      | 0,2289 | 0,7875   |
| TcCLB.506167.9   | hypothetical protein, conserved                           | 0,2288 | 0,02015  |
| TcCLB.507017.70  | ribosomal RNA adenine dimethylase family protein, putati  | 0,2288 | 0,06127  |
| TcCLB.511071.80  | hypothetical protein, conserved                           | 0,2288 | 0,2799   |
| TcCLB.510119.20  | elongation factor 1-alpha, putative                       | 0,2287 | 0,006895 |
| TcCLB.508525.10  | hypothetical protein, conserved                           | 0,2287 | 0,1916   |
| TcCLB.505989.100 | hypothetical protein, conserved                           | 0,2286 | 0,2048   |
| TcCLB.509161.100 | hypothetical protein, conserved                           | 0,2285 | 0,05822  |
| TcCLB.509901.170 | apurinic/aprimidinic endonuclease (TCAP)                  | 0,2285 | 0,1034   |
| TcCLB.507957.90  | mucin TcMUCII, putative                                   | 0,2285 | 0,6584   |
| TcCLB.508909.30  | hypothetical protein, conserved                           | 0,2283 | 0,09166  |
| TcCLB.507831.70  | pyruvate dehydrogenase E1 component alpha subunit, puta   | 0,2282 | 0,09024  |
| TcCLB.508957.40  | hypothetical protein, conserved (pseudogene)              | 0,2281 | 0,02714  |
| TcCLB.503747.20  | hypothetical protein                                      | 0,2281 | 0,3122   |
| TcCLB.507523.70  | trans-sialidase, Group V, putative                        | 0,2281 | 0,5653   |
| TcCLB.510799.70  | hypothetical protein, conserved                           | 0,228  | 0,08711  |
| TcCLB.509877.50  | glycosomal membrane protein, putative                     | 0,228  | 0,2425   |
| TcCLB.506679.130 | hypothetical protein, conserved                           | 0,2279 | 0,1119   |
| TcCLB.506529.530 | Present in the outer mitochondrial membrane proteome 1:   | 0,2279 | 0,2899   |
| TcCLB.509905.190 | elongation factor 1-gamma (EF-1-gamma, pseudogene), p     | 0,2279 | 0,5184   |
| TcCLB.506125.30  | phosphoglycerate kinase, putative                         | 0,2278 | 0,1692   |
| TcCLB.511499.69  | hypothetical protein (fragment)                           | 0,2277 | 0,3183   |
| TcCLB.506211.190 | hypothetical protein, conserved                           | 0,2276 | 0,03235  |
| TcCLB.509717.100 | membrane-bound acid phosphatase 2, putative               | 0,2276 | 0,05259  |

|                  |                                                            |        |         |
|------------------|------------------------------------------------------------|--------|---------|
| TcCLB.511179.130 | hypothetical protein, conserved                            | 0,2276 | 0,1109  |
| TcCLB.509543.50  | DNAK protein, putative                                     | 0,2275 | 0,02498 |
| TcCLB.508397.20  | hypothetical protein, conserved                            | 0,2275 | 0,2734  |
| TcCLB.508221.650 | trans-sialidase, Group V, putative                         | 0,2274 | 0,5244  |
| TcCLB.507927.100 | hypothetical protein                                       | 0,2273 | 0,02442 |
| TcCLB.507049.179 | hypothetical protein, conserved                            | 0,2273 | 0,06231 |
| TcCLB.506301.30  | hypothetical protein, conserved                            | 0,2272 | 0,01999 |
| TcCLB.506337.10  | vacuolar protein sorting-associated protein-like, putative | 0,2272 | 0,08586 |
| TcCLB.508813.70  | hypothetical protein, conserved                            | 0,2272 | 0,1016  |
| TcCLB.508165.14  | trans-sialidase, putative (fragment)                       | 0,2272 | 0,7374  |
| TcCLB.504033.160 | hypothetical protein                                       | 0,227  | 0,107   |
| TcCLB.506821.10  | hypothetical protein                                       | 0,2268 | 0,1591  |
| TcCLB.510759.100 | hypothetical protein, conserved                            | 0,2267 | 0,03779 |
| TcCLB.508557.20  | amino acid transporter, putative                           | 0,2267 | 0,3075  |
| TcCLB.506883.69  | hypothetical protein, conserved                            | 0,2266 | 0,3785  |
| TcCLB.504159.50  | aquaporin-like protein, putative                           | 0,2264 | 0,06297 |
| TcCLB.510303.310 | arginine N-methyltransferase, type III, putative (PRMT7)   | 0,2262 | 0,03136 |
| TcCLB.507941.30  | PrimPol-like protein 1, putative (ppl1)                    | 0,2262 | 0,1245  |
| TcCLB.508235.20  | mucin TcMUCIII, putative                                   | 0,2262 | 0,4902  |
| TcCLB.511505.10  | RNA pseudouridylate synthase, putative                     | 0,2261 | 0,1065  |
| TcCLB.510761.14  | 60S ribosomal protein L26, putative                        | 0,226  | 0,01108 |
| TcCLB.511661.100 | protein kinase, putative                                   | 0,226  | 0,0147  |
| TcCLB.506297.160 | 40S ribosomal protein S5, putative                         | 0,226  | 0,02768 |
| TcCLB.510307.200 | hypothetical protein, conserved                            | 0,2259 | 0,1952  |
| TcCLB.507911.60  | retrotransposon hot spot protein (RHS, pseudogene), putat  | 0,2259 | 0,6306  |
| TcCLB.511407.40  | hypothetical protein, conserved                            | 0,2258 | 0,1294  |
| TcCLB.509551.120 | hypothetical protein                                       | 0,2256 | 0,2861  |
| TcCLB.503951.10  | retrotransposon hot spot protein (RHS, pseudogene), putat  | 0,2256 | 0,5617  |
| TcCLB.508745.30  | trans-sialidase, Group V, putative                         | 0,2255 | 0,6197  |
| TcCLB.510157.20  | hypothetical protein, conserved                            | 0,2254 | 0,6842  |
| TcCLB.510575.130 | chloride channel protein, putative                         | 0,2253 | 0,02877 |
| TcCLB.508173.30  | trans-sialidase (pseudogene), putative                     | 0,2253 | 0,2132  |
| TcCLB.511751.22  | hypothetical protein, conserved                            | 0,2253 | 0,3735  |
| TcCLB.511417.20  | retrotransposon hot spot protein (RHS, pseudogene), putat  | 0,2252 | 0,4946  |
| TcCLB.509317.29  | hypothetical protein                                       | 0,2251 | 0,4297  |
| TcCLB.509259.21  | elongation factor 1-gamma (EF-1-gamma, pseudogene), p      | 0,2251 | 0,7178  |
| TcCLB.506797.90  | short chain dehydrogenase/reductase, putative              | 0,225  | 0,1058  |
| TcCLB.491081.10  | retrotransposon hot spot protein (RHS, pseudogene), putat  | 0,225  | 0,3397  |
| TcCLB.508165.330 | trans-sialidase (pseudogene), putative                     | 0,2246 | 0,5142  |
| TcCLB.509207.20  | histone H2A, putative                                      | 0,2243 | 0,7278  |
| TcCLB.506405.10  | phosphomannomutase-like protein, putative                  | 0,2242 | 0,01968 |
| TcCLB.510645.30  | 3,2-trans-enoyl-CoA isomerase, mitochondrial precursor, p  | 0,2242 | 0,04575 |
| TcCLB.506179.30  | hypothetical protein, conserved                            | 0,2242 | 0,1684  |
| TcCLB.510579.119 | hypothetical protein, conserved                            | 0,2242 | 0,1884  |
| TcCLB.506407.100 | hypothetical protein, conserved                            | 0,2241 | 0,03549 |

|                  |                                                           |        |         |
|------------------|-----------------------------------------------------------|--------|---------|
| TcCLB.504147.70  | hypothetical protein, conserved                           | 0,2241 | 0,1207  |
| TcCLB.507669.130 | hypothetical protein, conserved                           | 0,2241 | 0,1294  |
| TcCLB.505997.100 | retrotransposon hot spot protein (RHS, pseudogene), putat | 0,224  | 0,2378  |
| TcCLB.509165.30  | AGP2beta-2, putative                                      | 0,2239 | 0,03908 |
| TcCLB.511837.29  | iron-sulfur cluster assembly protein, putative            | 0,2239 | 0,1552  |
| TcCLB.510299.70  | hypothetical protein, conserved                           | 0,2239 | 0,2304  |
| TcCLB.506131.30  | mucin-associated surface protein (MASP), putative         | 0,2239 | 0,7366  |
| TcCLB.507711.300 | Archaic translocase of outer membrane 11 kDa subunit, pu  | 0,2237 | 0,2292  |
| TcCLB.506335.60  | mucin TcMUCII (pseudogene), putative                      | 0,2237 | 0,418   |
| TcCLB.508165.300 | mucin-associated surface protein (MASP), putative         | 0,2237 | 0,5309  |
| TcCLB.503665.21  | elongation factor 1-gamma (EF-1-gamma, pseudogene), p     | 0,2237 | 0,5314  |
| TcCLB.508479.370 | hypothetical protein, conserved                           | 0,2236 | 0,1224  |
| TcCLB.507073.20  | hypothetical protein, conserved                           | 0,2236 | 0,3588  |
| TcCLB.508717.30  | phosphoribosylpyrophosphate synthetase, putative          | 0,2235 | 0,02822 |
| TcCLB.508461.19  | hypothetical protein, conserved                           | 0,2235 | 0,1696  |
| TcCLB.507777.10  | hypothetical protein, conserved                           | 0,2235 | 0,254   |
| TcCLB.511031.10  | hypothetical protein, conserved                           | 0,2235 | 0,3881  |
| TcCLB.508165.34  | mucin TcMUC (pseudogene), putative                        | 0,2235 | 0,6589  |
| TcCLB.508241.110 | hypothetical protein, conserved                           | 0,2234 | 0,1051  |
| TcCLB.507677.70  | hypothetical protein, conserved                           | 0,223  | 0,1684  |
| TcCLB.511885.10  | hypothetical protein, conserved (pseudogene)              | 0,2228 | 0,02405 |
| TcCLB.511253.20  | kinesin-like protein, putative                            | 0,2228 | 0,303   |
| TcCLB.507063.120 | hypothetical protein, conserved                           | 0,2226 | 0,2932  |
| TcCLB.510025.220 | mucin-associated surface protein (MASP), putative         | 0,2226 | 0,6525  |
| TcCLB.511889.50  | retrotransposon hot spot protein (RHS, pseudogene), putat | 0,2225 | 0,1224  |
| TcCLB.510307.250 | trans-sialidase (pseudogene), putative                    | 0,2225 | 0,2303  |
| TcCLB.511577.40  | 35 kDa cyclophilin, putative (CYP35)                      | 0,2225 | 0,2903  |
| TcCLB.503703.50  | copper-transporting ATPase-like protein, putative         | 0,2223 | 0,03815 |
| TcCLB.508777.40  | leucine-rich repeat protein, putative                     | 0,2222 | 0,0869  |
| TcCLB.508071.30  | beta galactofuranosyl glycosyltransferase, putative       | 0,2221 | 0,5175  |
| TcCLB.511537.60  | hypothetical protein, conserved                           | 0,2218 | 0,07577 |
| TcCLB.509599.70  | hypothetical protein, conserved                           | 0,2218 | 0,119   |
| TcCLB.509163.100 | hypothetical protein, conserved (pseudogene)              | 0,2218 | 0,2838  |
| TcCLB.508977.20  | mucin-associated surface protein (MASP), putative         | 0,2218 | 0,6821  |
| TcCLB.504203.50  | hypothetical protein, conserved                           | 0,2217 | 0,245   |
| TcCLB.506727.150 | hypothetical protein, conserved                           | 0,2217 | 0,2722  |
| TcCLB.509055.60  | hypothetical protein, conserved                           | 0,2216 | 0,3727  |
| TcCLB.506973.14  | mucin TcMUCII (pseudogene), putative                      | 0,2215 | 0,4775  |
| TcCLB.508539.95  | surface protease GP63 (pseudogene), putative              | 0,2215 | 0,7044  |
| TcCLB.506009.90  | hypothetical protein, conserved                           | 0,2213 | 0,07147 |
| TcCLB.506727.30  | hypothetical protein, conserved                           | 0,2212 | 0,1916  |
| TcCLB.457101.20  | dynein heavy chain, cytosolic, putative                   | 0,2209 | 0,04165 |
| TcCLB.506855.360 | hypothetical protein, conserved                           | 0,2207 | 0,02427 |
| TcCLB.509967.30  | aspartyl-tRNA synthetase, putative                        | 0,2207 | 0,1217  |
| TcCLB.510373.100 | hypothetical protein, conserved (pseudogene)              | 0,2204 | 0,6976  |

|                  |                                                           |        |          |
|------------------|-----------------------------------------------------------|--------|----------|
| TcCLB.503611.20  | ribosomal protein L24, putative                           | 0,2202 | 0,03079  |
| TcCLB.510517.90  | hypothetical protein, conserved                           | 0,2202 | 0,181    |
| TcCLB.510091.80  | pyruvate dehydrogenase E1 beta subunit, putative          | 0,2201 | 0,03077  |
| TcCLB.510885.120 | hypothetical protein, conserved                           | 0,2201 | 0,1138   |
| TcCLB.511689.19  | hypothetical protein, conserved (fragment)                | 0,22   | 0,1744   |
| TcCLB.504035.90  | translation initiation factor IF-2, putative              | 0,2199 | 0,04702  |
| TcCLB.508535.30  | hypothetical protein, conserved                           | 0,2199 | 0,1288   |
| TcCLB.509877.89  | hypothetical protein, conserved                           | 0,2199 | 0,3089   |
| TcCLB.510519.90  | hypothetical protein, conserved                           | 0,2199 | 0,4821   |
| TcCLB.510309.50  | 60S acidic ribosomal protein P2, putative                 | 0,2197 | 0,04621  |
| TcCLB.510879.160 | tyrosine phosphatase, putative                            | 0,2195 | 0,01711  |
| TcCLB.509715.90  | UDP-glucose/GDP-mannose dehydrogenase family, NAD bi      | 0,2195 | 0,2003   |
| TcCLB.510659.74  | hypothetical protein, conserved                           | 0,2195 | 0,4765   |
| TcCLB.509937.100 | ubiquitin/ribosomal protein S27a, putative                | 0,2194 | 0,002199 |
| TcCLB.510719.120 | hypothetical protein, conserved                           | 0,2194 | 0,06867  |
| TcCLB.506727.20  | hypothetical protein, conserved                           | 0,2193 | 0,05626  |
| TcCLB.509567.60  | hypothetical protein                                      | 0,2192 | 0,1072   |
| TcCLB.509509.30  | 6-phosphofructo-2-kinase/fructose-2,6-biphosphatase, put  | 0,2192 | 0,1134   |
| TcCLB.505025.40  | mucin-associated surface protein (MASP), putative         | 0,2192 | 0,6561   |
| TcCLB.507485.34  | DNA-directed RNA polymerase III subunit, putative         | 0,2192 | 0,7343   |
| TcCLB.506575.40  | hypothetical protein                                      | 0,2191 | 0,1037   |
| TcCLB.507357.35  | hypothetical protein                                      | 0,219  | 0,6708   |
| TcCLB.511001.190 | vacuolar ATP synthase subunit d, putative                 | 0,2188 | 0,09618  |
| TcCLB.463323.20  | retrotransposon hot spot protein (RHS, pseudogene), putat | 0,2188 | 0,3399   |
| TcCLB.508111.10  | trans-sialidase (pseudogene), putative                    | 0,2188 | 0,5134   |
| TcCLB.506599.170 | mucin-associated surface protein (MASP), putative         | 0,2187 | 0,5047   |
| TcCLB.510535.20  | hypothetical protein, conserved                           | 0,2186 | 0,04134  |
| TcCLB.506265.114 | Enriched in surface-labeled proteome protein 11, putative | 0,2186 | 0,1134   |
| TcCLB.509317.90  | hypothetical protein, conserved                           | 0,2186 | 0,1791   |
| TcCLB.510519.10  | hypothetical protein                                      | 0,2183 | 0,05081  |
| TcCLB.511127.160 | integral membrane transport protein, putative             | 0,2183 | 0,6039   |
| TcCLB.410199.7   | hypothetical protein                                      | 0,2182 | 0,6418   |
| TcCLB.507021.30  | hypothetical protein, conserved                           | 0,218  | 0,2844   |
| TcCLB.506705.40  | hypothetical protein, conserved                           | 0,2179 | 0,1325   |
| TcCLB.503827.50  | trans-sialidase (pseudogene), putative                    | 0,2178 | 0,6892   |
| TcCLB.504133.45  | hypothetical protein, conserved                           | 0,2177 | 0,5308   |
| TcCLB.511385.120 | hypothetical protein, conserved                           | 0,2177 | 0,5331   |
| TcCLB.506933.60  | mitochondrial RNA binding protein, putative               | 0,2176 | 0,01299  |
| TcCLB.508781.40  | hypothetical protein, conserved                           | 0,2175 | 0,1369   |
| TcCLB.510513.40  | hypothetical protein, conserved                           | 0,2175 | 0,1794   |
| TcCLB.507759.10  | trans-sialidase, Group VIII, putative                     | 0,2175 | 0,6586   |
| TcCLB.511629.30  | hypothetical protein, conserved                           | 0,2174 | 0,2101   |
| TcCLB.511295.40  | tRNA pseudouridine synthase A-like protein, putative      | 0,2173 | 0,08628  |
| TcCLB.510769.10  | hypothetical protein, conserved                           | 0,2173 | 0,1386   |
| TcCLB.511859.140 | hypothetical protein                                      | 0,2172 | 0,2984   |

|                  |                                                          |        |          |
|------------------|----------------------------------------------------------|--------|----------|
| TcCLB.510191.10  | mucin-associated surface protein (MASP), putative        | 0,2172 | 0,6557   |
| TcCLB.508451.10  | trans-sialidase (pseudogene), putative                   | 0,217  | 0,3702   |
| TcCLB.503817.10  | trans-sialidase (pseudogene), putative                   | 0,2166 | 0,6242   |
| TcCLB.511761.89  | hypothetical protein, conserved (fragment)               | 0,2164 | 0,3587   |
| TcCLB.504249.100 | trans-sialidase (pseudogene), putative                   | 0,2163 | 0,3984   |
| TcCLB.506959.64  | 3-keto-dihydrosphingosine reductase                      | 0,2162 | 0,13     |
| TcCLB.510047.120 | mucin-associated surface protein (MASP), putative        | 0,2162 | 0,7029   |
| TcCLB.511301.160 | trans-sialidase, Group II, putative                      | 0,2161 | 0,2446   |
| TcCLB.504575.10  | hypothetical protein, conserved                          | 0,2161 | 0,5134   |
| TcCLB.410589.19  | hypothetical protein, conserved                          | 0,2158 | 0,4026   |
| TcCLB.508163.250 | trans-sialidase, Group VI, putative                      | 0,2158 | 0,5386   |
| TcCLB.506959.140 | hypothetical protein, conserved                          | 0,2157 | 0,2857   |
| TcCLB.509507.40  | hypothetical protein, conserved                          | 0,2155 | 0,1922   |
| TcCLB.509569.94  | hypothetical protein, conserved                          | 0,2154 | 0,2801   |
| TcCLB.506857.30  | hypothetical protein, conserved                          | 0,2153 | 0,1661   |
| TcCLB.507817.70  | hypothetical protein, conserved                          | 0,2152 | 0,1951   |
| TcCLB.507513.90  | RNA-editing complex protein MP100, putative              | 0,215  | 0,03604  |
| TcCLB.508859.50  | hypothetical protein, conserved                          | 0,2148 | 0,3055   |
| TcCLB.508125.130 | mucin TcMUCII, putative                                  | 0,2148 | 0,6851   |
| TcCLB.507809.80  | hypothetical protein, conserved                          | 0,2147 | 0,003774 |
| TcCLB.504229.20  | glycine dehydrogenase [decarboxylating] (pseudogene), pu | 0,2142 | 0,05269  |
| TcCLB.509733.190 | hypothetical protein, conserved                          | 0,2142 | 0,1223   |
| TcCLB.511421.190 | ESCO acetyltransferase domain-containing protein         | 0,214  | 0,1786   |
| TcCLB.503773.20  | hypothetical protein, conserved                          | 0,214  | 0,4529   |
| TcCLB.506857.50  | hypothetical protein, conserved                          | 0,2139 | 0,06323  |
| TcCLB.510943.180 | hypothetical protein, conserved                          | 0,2138 | 0,1916   |
| TcCLB.508873.520 | mucin-associated surface protein (MASP, pseudogene), pu  | 0,2138 | 0,6692   |
| TcCLB.511283.260 | hypothetical protein, conserved                          | 0,2137 | 0,01504  |
| TcCLB.507787.70  | hypothetical protein, conserved                          | 0,2136 | 0,2595   |
| TcCLB.510421.280 | hypothetical protein, conserved                          | 0,2135 | 0,1259   |
| TcCLB.508647.30  | hypothetical protein, conserved                          | 0,2135 | 0,1422   |
| TcCLB.504787.80  | mucin TcMUCII, putative                                  | 0,2135 | 0,5622   |
| TcCLB.503683.20  | hypothetical protein, conserved                          | 0,2134 | 0,0552   |
| TcCLB.509671.84  | hypothetical protein, conserved                          | 0,2134 | 0,1692   |
| TcCLB.406115.10  | trans-sialidase, putative (fragment)                     | 0,2134 | 0,5665   |
| TcCLB.509537.90  | hypothetical protein, conserved                          | 0,2129 | 0,03461  |
| TcCLB.510659.36  | hypothetical protein, conserved                          | 0,2129 | 0,1672   |
| TcCLB.509133.10  | trans-sialidase (pseudogene), putative                   | 0,2128 | 0,4899   |
| TcCLB.504129.40  | hypothetical protein, conserved                          | 0,2126 | 0,2041   |
| TcCLB.506587.70  | hypothetical protein, conserved                          | 0,2125 | 0,088    |
| TcCLB.506635.130 | hypothetical protein, conserved                          | 0,2124 | 0,08085  |
| TcCLB.506529.480 | hypothetical protein, conserved                          | 0,2124 | 0,1143   |
| TcCLB.511269.4   | Ras-related protein Rab5A, putative (RAB5A)              | 0,2124 | 0,1254   |
| TcCLB.509911.110 | hypothetical protein, conserved                          | 0,2123 | 0,2596   |
| TcCLB.504153.129 | hypothetical protein, conserved                          | 0,2122 | 0,1073   |

|                  |                                                               |        |          |
|------------------|---------------------------------------------------------------|--------|----------|
| TcCLB.506559.270 | sarcoplasmic reticulum glycoprotein, putative                 | 0,2121 | 0,03283  |
| TcCLB.506021.10  | retrotransposon hot spot protein (RHS, pseudogene), putative  | 0,212  | 0,1594   |
| TcCLB.509733.20  | hypothetical protein                                          | 0,2119 | 0,4583   |
| TcCLB.504929.10  | casein kinase, delta isoform, putative                        | 0,2119 | 0,7343   |
| TcCLB.510423.60  | hypothetical protein, conserved                               | 0,2118 | 0,09365  |
| TcCLB.508541.230 | casein kinase, putative                                       | 0,2118 | 0,5166   |
| TcCLB.506425.130 | hypothetical protein, conserved                               | 0,2117 | 0,1874   |
| TcCLB.510279.70  | hypothetical protein                                          | 0,2117 | 0,6988   |
| TcCLB.503885.20  | hypothetical protein, conserved                               | 0,2116 | 0,05027  |
| TcCLB.506971.70  | mucin TcMUCII, putative                                       | 0,2114 | 0,7943   |
| TcCLB.503939.10  | acetyltransferase, putative                                   | 0,2112 | 0,1765   |
| TcCLB.510207.40  | mucin-associated surface protein (MASP), putative             | 0,2112 | 0,561    |
| TcCLB.507061.10  | hypothetical protein                                          | 0,2111 | 0,3677   |
| TcCLB.508741.250 | hypothetical protein                                          | 0,211  | 0,07511  |
| TcCLB.511507.20  | hypothetical protein, conserved                               | 0,211  | 0,1883   |
| TcCLB.511401.90  | trans-sialidase, Group V, putative                            | 0,211  | 0,3562   |
| TcCLB.507013.30  | hypothetical protein, conserved                               | 0,2109 | 0,325    |
| TcCLB.506445.30  | cation transporter, putative                                  | 0,2105 | 0,0742   |
| TcCLB.506543.90  | cytochrome c oxidase assembly protein, putative               | 0,2105 | 0,1715   |
| TcCLB.507509.70  | hypothetical protein, conserved                               | 0,2104 | 0,127    |
| TcCLB.509965.280 | hypothetical protein, conserved                               | 0,2102 | 0,2297   |
| TcCLB.506275.30  | hypothetical protein, conserved                               | 0,2102 | 0,3526   |
| TcCLB.511411.8   | hypothetical protein, conserved (fragment)                    | 0,2101 | 0,2679   |
| TcCLB.510275.90  | hypothetical protein                                          | 0,2101 | 0,4962   |
| TcCLB.508647.290 | DNA repair and recombination protein RAD54, putative          | 0,21   | 0,01646  |
| TcCLB.506783.20  | trans-sialidase (pseudogene), putative                        | 0,2099 | 0,4421   |
| TcCLB.503651.10  | hypothetical protein, conserved                               | 0,2097 | 0,09277  |
| TcCLB.510067.9   | hypothetical protein, conserved                               | 0,2096 | 0,1433   |
| TcCLB.507357.71  | hypothetical protein                                          | 0,2096 | 0,7118   |
| TcCLB.506531.50  | metacaspase, putative                                         | 0,2092 | 0,219    |
| TcCLB.509859.30  | hypothetical protein, conserved                               | 0,2091 | 0,114    |
| TcCLB.506977.110 | hypothetical protein, conserved (pseudogene)                  | 0,2091 | 0,1572   |
| TcCLB.503957.90  | dispersed gene family protein 1 (DGF-1, pseudogene), putative | 0,2089 | 0,3821   |
| TcCLB.506625.120 | hypothetical protein, conserved                               | 0,2088 | 0,08054  |
| TcCLB.509749.36  | ribosomal protein L29, putative                               | 0,2088 | 0,08994  |
| TcCLB.511603.80  | mucin-associated surface protein (MASP), putative             | 0,2088 | 0,6453   |
| TcCLB.506887.20  | hypothetical protein, conserved                               | 0,2087 | 0,1392   |
| TcCLB.508185.10  | enoyl-CoA hydratase, mitochondrial precursor, putative        | 0,2087 | 0,1394   |
| TcCLB.509777.70  | Calcium ATPase SERCA-like                                     | 0,2085 | 0,006446 |
| TcCLB.503703.100 | hypothetical protein, conserved                               | 0,2084 | 0,1233   |
| TcCLB.506303.150 | hypothetical protein, conserved                               | 0,2084 | 0,1368   |
| TcCLB.509663.25  | hypothetical protein, conserved (pseudogene)                  | 0,2084 | 0,4853   |
| TcCLB.508153.420 | hypothetical protein, conserved                               | 0,2083 | 0,07081  |
| TcCLB.507513.100 | hypothetical protein, conserved                               | 0,2082 | 0,1005   |
| TcCLB.483009.9   | exonuclease, putative                                         | 0,2081 | 0,1787   |



|                  |                                                           |        |         |
|------------------|-----------------------------------------------------------|--------|---------|
| TcCLB.507953.40  | mucin-associated surface protein (MASP), putative         | 0,2081 | 0,7339  |
| TcCLB.508771.60  | retrotransposon hot spot protein (RHS, pseudogene), putat | 0,208  | 0,2084  |
| TcCLB.510889.251 | Present in the outer mitochondrial membrane proteome 1:   | 0,208  | 0,3591  |
| TcCLB.511027.10  | chloride channel protein, putative                        | 0,2079 | 0,127   |
| TcCLB.510173.110 | hypothetical protein, conserved                           | 0,2078 | 0,1031  |
| TcCLB.506529.280 | hypothetical protein, conserved                           | 0,2077 | 0,1734  |
| TcCLB.506573.50  | hypothetical protein, conserved                           | 0,2077 | 0,2666  |
| TcCLB.506147.60  | 3-demethylubiquinone-9 3-methyltransferase, putative      | 0,2076 | 0,1842  |
| TcCLB.507429.60  | hypothetical protein                                      | 0,2075 | 0,5003  |
| TcCLB.507989.10  | hypothetical protein, conserved                           | 0,2072 | 0,1793  |
| TcCLB.511303.50  | hypothetical protein, conserved                           | 0,2072 | 0,3056  |
| TcCLB.505807.29  | hypothetical protein, conserved                           | 0,2072 | 0,5487  |
| TcCLB.508365.100 | surface protease GP63, putative                           | 0,2072 | 0,6642  |
| TcCLB.509727.20  | retrotransposon hot spot protein (RHS, pseudogene), putat | 0,2072 | 0,7184  |
| TcCLB.508233.70  | ATP-dependent protease binding subunit (pseudogene), pu   | 0,2071 | 0,4266  |
| TcCLB.509429.70  | hypothetical protein                                      | 0,207  | 0,08705 |
| TcCLB.447255.4   | ubiquitin, putative                                       | 0,207  | 0,2496  |
| TcCLB.511353.60  | hypothetical protein, conserved                           | 0,207  | 0,2512  |
| TcCLB.506759.150 | hypothetical protein, conserved (pseudogene)              | 0,207  | 0,6777  |
| TcCLB.503487.20  | hypothetical protein                                      | 0,2069 | 0,09709 |
| TcCLB.509671.99  | hypothetical protein, conserved                           | 0,2069 | 0,3963  |
| TcCLB.511729.30  | hypothetical protein, conserved                           | 0,2068 | 0,196   |
| TcCLB.503437.31  | ATP-dependent DEAD/H RNA helicase (pseudogene), putat     | 0,2066 | 0,6746  |
| TcCLB.504111.20  | metallo- peptidase, Clan MG, Family M24                   | 0,2063 | 0,09396 |
| TcCLB.509399.170 | elongation factor 1-gamma (EF-1-gamma), putative          | 0,2062 | 0,2128  |
| TcCLB.509777.4   | ribosomal protein L2, putative                            | 0,2062 | 0,2277  |
| TcCLB.509253.50  | recombination initiation protein NBS1, putative           | 0,2061 | 0,04697 |
| TcCLB.506925.120 | eukaryotic initiation factor 5a, putative                 | 0,2061 | 0,08049 |
| TcCLB.506335.69  | mucin-associated surface protein (MASP, pseudogene), pu   | 0,206  | 0,595   |
| TcCLB.510147.9   | hypothetical protein, conserved                           | 0,2057 | 0,4452  |
| TcCLB.509251.70  | mucin-associated surface protein (MASP, pseudogene), pu   | 0,2056 | 0,3973  |
| TcCLB.510885.110 | hypothetical protein, conserved                           | 0,2055 | 0,1109  |
| TcCLB.504157.70  | hypothetical protein, conserved                           | 0,2054 | 0,06638 |
| TcCLB.510087.40  | hypothetical protein                                      | 0,2053 | 0,6982  |
| TcCLB.511907.200 | cysteine peptidase inhibitor, putative                    | 0,2052 | 0,06282 |
| TcCLB.511593.51  | elongation factor 1-gamma (EF-1-gamma, pseudogene), p     | 0,2051 | 0,4877  |
| TcCLB.511599.110 | mucin TcMUCII, putative                                   | 0,2049 | 0,7251  |
| TcCLB.408547.5   | mucin TcMUCII, putative                                   | 0,2049 | 0,7385  |
| TcCLB.509719.23  | hypothetical protein, conserved                           | 0,2048 | 0,3184  |
| TcCLB.510201.70  | hypothetical protein                                      | 0,2048 | 0,652   |
| TcCLB.465323.10  | hypothetical protein (fragment)                           | 0,2048 | 0,7373  |
| TcCLB.508895.30  | Sarcalumenin, putative                                    | 0,2047 | 0,03749 |
| TcCLB.506133.170 | mucin-associated surface protein (MASP, pseudogene), pu   | 0,2047 | 0,573   |
| TcCLB.510013.50  | trans-sialidase, Group IV, putative                       | 0,2047 | 0,668   |
| TcCLB.511921.167 | hypothetical protein, conserved (pseudogene)              | 0,2047 | 0,6839  |

|                  |                                                           |        |          |
|------------------|-----------------------------------------------------------|--------|----------|
| TcCLB.511553.100 | mucin-associated surface protein (MASP), putative         | 0,2045 | 0,6251   |
| TcCLB.510949.10  | dual specificity protein phosphatase, putative            | 0,2044 | 0,1444   |
| TcCLB.509769.100 | hypothetical protein, conserved                           | 0,2044 | 0,1589   |
| TcCLB.506751.70  | retrotransposon hot spot protein (RHS, pseudogene), putat | 0,2043 | 0,6104   |
| TcCLB.510879.120 | ribosomal protein L3, putative                            | 0,2041 | 0,003494 |
| TcCLB.506867.40  | surface protease GP63, putative                           | 0,2041 | 0,1374   |
| TcCLB.511861.14  | trans-sialidase (pseudogene), putative                    | 0,2039 | 0,3718   |
| TcCLB.505071.110 | hypothetical protein, conserved                           | 0,2037 | 0,08659  |
| TcCLB.509015.10  | copper-transporting ATPase, putative                      | 0,2037 | 0,5634   |
| TcCLB.510729.10  | AMP deaminase, putative                                   | 0,2036 | 0,1082   |
| TcCLB.508831.63  | hypothetical protein                                      | 0,2036 | 0,1511   |
| TcCLB.507711.340 | hypothetical protein, conserved                           | 0,2036 | 0,3006   |
| TcCLB.511491.120 | hypothetical protein, conserved                           | 0,2035 | 0,08592  |
| TcCLB.506955.240 | trans-sialidase, Group V, putative                        | 0,2035 | 0,4213   |
| TcCLB.503583.80  | dual specificity protein phosphatase or MAP kinase phosph | 0,2033 | 0,1683   |
| TcCLB.510309.60  | hypothetical protein, conserved                           | 0,2032 | 0,09837  |
| TcCLB.509769.140 | hypothetical protein, conserved                           | 0,2031 | 0,2456   |
| TcCLB.504069.56  | 60S ribosomal protein L37a, putative                      | 0,203  | 0,07305  |
| TcCLB.506573.40  | hypothetical protein, conserved                           | 0,203  | 0,1222   |
| TcCLB.507193.10  | dispersed gene family protein 1 (DGF-1), putative         | 0,2029 | 0,481    |
| TcCLB.509647.70  | guanylate kinase, putative                                | 0,2027 | 0,1277   |
| TcCLB.507093.20  | hypothetical protein, conserved                           | 0,2027 | 0,2566   |
| TcCLB.511181.90  | peroxisome targeting signal 1 receptor, putative (PEX5)   | 0,2026 | 0,07646  |
| TcCLB.508413.44  | 60S ribosomal protein L12, putative                       | 0,2025 | 0,01496  |
| TcCLB.506821.200 | hypothetical protein, conserved                           | 0,2025 | 0,1394   |
| TcCLB.507623.40  | hypothetical protein, conserved                           | 0,2024 | 0,2262   |
| TcCLB.506201.150 | hypothetical protein, conserved                           | 0,2023 | 0,4579   |
| TcCLB.510487.44  | elongation factor 1-gamma (EF-1-gamma, pseudogene), p     | 0,2023 | 0,769    |
| TcCLB.509971.70  | hypothetical protein                                      | 0,2022 | 0,6197   |
| TcCLB.509767.210 | vesicle transport v-SNARE 11, putative                    | 0,2021 | 0,2473   |
| TcCLB.510877.20  | hypothetical protein, conserved                           | 0,202  | 0,0495   |
| TcCLB.507867.100 | hypothetical protein                                      | 0,2019 | 0,07575  |
| TcCLB.508853.10  | mucin-associated surface protein (MASP), putative         | 0,2019 | 0,6101   |
| TcCLB.506637.80  | hypothetical protein                                      | 0,2017 | 0,1278   |
| TcCLB.509205.70  | hypothetical protein, conserved                           | 0,2017 | 0,1962   |
| TcCLB.507089.70  | RNA-binding protein, putative                             | 0,2016 | 0,2809   |
| TcCLB.506567.77  | hypothetical protein, conserved (pseudogene)              | 0,2016 | 0,5326   |
| TcCLB.507693.5   | tryptophanyl-tRNA synthetase, putative (fragment)         | 0,2015 | 0,2889   |
| TcCLB.508895.20  | hypothetical protein, conserved                           | 0,2013 | 0,1354   |
| TcCLB.506829.20  | hypothetical protein, conserved                           | 0,2012 | 0,1      |
| TcCLB.510357.150 | hypothetical protein, conserved                           | 0,2012 | 0,2082   |
| TcCLB.506291.20  | hypothetical protein                                      | 0,2012 | 0,7945   |
| TcCLB.509087.20  | dispersed gene family protein 1 (DGF-1), putative         | 0,2011 | 0,3148   |
| TcCLB.506367.70  | hypothetical protein, conserved                           | 0,2009 | 0,2426   |
| TcCLB.416041.24  | retrotransposon hot spot protein (RHS, pseudogene), putat | 0,2009 | 0,3231   |

|                  |                                                           |        |         |
|------------------|-----------------------------------------------------------|--------|---------|
| TcCLB.506425.169 | Ras-related protein RAB2B, putative (fragment) (RAB2B)    | 0,2007 | 0,3486  |
| TcCLB.508547.130 | NUDIX family hydrolase, putative                          | 0,2006 | 0,2063  |
| TcCLB.511649.120 | hypothetical protein, conserved                           | 0,2004 | 0,1952  |
| TcCLB.506291.31  | surface protease GP63 (pseudogene), putative              | 0,2003 | 0,7242  |
| TcCLB.507491.130 | hypothetical protein, conserved                           | 0,2    | 0,211   |
| TcCLB.505807.20  | hypothetical protein, conserved                           | 0,1999 | 0,1525  |
| TcCLB.509725.50  | protein kinase, putative                                  | 0,1998 | 0,6448  |
| TcCLB.509643.20  | hypothetical protein, conserved                           | 0,1995 | 0,1336  |
| TcCLB.511661.70  | hypothetical protein, conserved                           | 0,1995 | 0,2794  |
| TcCLB.507765.90  | hypothetical protein, conserved                           | 0,1992 | 0,1434  |
| TcCLB.508909.100 | hypothetical protein, conserved                           | 0,1992 | 0,1492  |
| TcCLB.504737.20  | mucin-associated surface protein (MASP, pseudogene), pu   | 0,1992 | 0,6865  |
| TcCLB.507673.60  | hypothetical protein, conserved                           | 0,1991 | 0,5566  |
| TcCLB.510189.60  | trans-sialidase (pseudogene), putative                    | 0,199  | 0,5857  |
| TcCLB.510657.150 | hypothetical protein                                      | 0,1989 | 0,1827  |
| TcCLB.509831.10  | cysteine desulfurase, putative                            | 0,1988 | 0,1893  |
| TcCLB.506727.60  | hypothetical protein, conserved                           | 0,1987 | 0,1124  |
| TcCLB.508851.150 | hypothetical protein, conserved                           | 0,1987 | 0,1807  |
| TcCLB.509985.10  | hypothetical protein, conserved (pseudogene)              | 0,1987 | 0,2127  |
| TcCLB.511255.50  | mucin-associated surface protein (MASP), putative         | 0,1987 | 0,6178  |
| TcCLB.510583.130 | mucin-associated surface protein (MASP), putative         | 0,1986 | 0,7133  |
| TcCLB.511745.30  | E3 ubiquitin-protein ligase, putative                     | 0,1985 | 0,08697 |
| TcCLB.510445.40  | hypothetical protein                                      | 0,1984 | 0,2476  |
| TcCLB.509747.30  | hypothetical protein, conserved                           | 0,1983 | 0,04122 |
| TcCLB.504255.30  | hypothetical protein, conserved                           | 0,1983 | 0,3948  |
| TcCLB.511693.60  | hypothetical protein, conserved                           | 0,1983 | 0,4302  |
| TcCLB.511825.66  | hypothetical protein, conserved                           | 0,1982 | 0,3851  |
| TcCLB.507093.310 | hypothetical protein, conserved                           | 0,1981 | 0,1435  |
| TcCLB.507603.100 | hypothetical protein, conserved                           | 0,198  | 0,2366  |
| TcCLB.506635.70  | hypothetical protein, conserved                           | 0,1979 | 0,09795 |
| TcCLB.508495.9   | mucin-associated surface protein (MASP, pseudogene), pu   | 0,1979 | 0,7486  |
| TcCLB.510257.60  | 3-ketoacyl-CoA reductase, putative                        | 0,1978 | 0,1113  |
| TcCLB.506181.30  | hypothetical protein, conserved                           | 0,1978 | 0,4099  |
| TcCLB.511025.10  | dynein light intermediate chain, putative                 | 0,1977 | 0,1135  |
| TcCLB.509543.20  | hypothetical protein, conserved                           | 0,1977 | 0,1567  |
| TcCLB.504163.40  | fructose-bisphosphate aldolase, glycosomal, putative      | 0,1976 | 0,1337  |
| TcCLB.508759.20  | trans-sialidase, Group V, putative                        | 0,1976 | 0,6608  |
| TcCLB.509297.30  | ADP-ribosylation factor, putative                         | 0,1976 | 0,7362  |
| TcCLB.509959.236 | N-acetyltransferase complex ARD1 subunit (pseudogene),    | 0,1976 | 0,7869  |
| TcCLB.506999.170 | hypothetical protein                                      | 0,1975 | 0,1492  |
| TcCLB.510477.30  | mucin TcMUCI, putative                                    | 0,1974 | 0,7072  |
| TcCLB.507927.40  | hypothetical protein, conserved                           | 0,1973 | 0,05822 |
| TcCLB.430567.10  | trans-sialidase, putative (fragment)                      | 0,1973 | 0,4892  |
| TcCLB.506127.170 | eukaryotic translation initiation factor eIF-4E, putative | 0,1972 | 0,07597 |
| TcCLB.510187.210 | hypothetical protein, conserved                           | 0,1971 | 0,01759 |

|                  |                                                                 |        |         |
|------------------|-----------------------------------------------------------------|--------|---------|
| TcCLB.511557.29  | hypothetical protein                                            | 0,1971 | 0,275   |
| TcCLB.506469.50  | hypothetical protein, conserved                                 | 0,1971 | 0,2928  |
| TcCLB.507105.60  | hypothetical protein, conserved                                 | 0,197  | 0,05788 |
| TcCLB.511553.30  | mucin-associated surface protein (MASP), putative               | 0,197  | 0,523   |
| TcCLB.509885.64  | hypothetical protein, conserved                                 | 0,1969 | 0,4747  |
| TcCLB.504081.450 | trans-sialidase (pseudogene), putative                          | 0,1969 | 0,4952  |
| TcCLB.511515.40  | heat shock 70 kDa protein, mitochondrial precursor, putative    | 0,1968 | 0,04441 |
| TcCLB.508691.10  | hypothetical protein, conserved                                 | 0,1968 | 0,3956  |
| TcCLB.507669.160 | hypothetical protein, conserved                                 | 0,1967 | 0,02583 |
| TcCLB.504021.80  | hypothetical protein, conserved                                 | 0,1967 | 0,2344  |
| TcCLB.508647.174 | hypothetical protein, conserved                                 | 0,1967 | 0,3163  |
| TcCLB.508765.30  | glycosylphosphatidylinositol-specific phospholipase C, putative | 0,1966 | 0,3051  |
| TcCLB.506037.10  | dispersed gene family protein 1 (DGF-1, pseudogene), putative   | 0,1966 | 0,7055  |
| TcCLB.506733.120 | hypothetical protein, conserved                                 | 0,1965 | 0,2133  |
| TcCLB.507653.10  | hypothetical protein, conserved                                 | 0,1965 | 0,3754  |
| TcCLB.509979.290 | trans-sialidase (pseudogene), putative                          | 0,1963 | 0,405   |
| TcCLB.506245.200 | mucin-associated surface protein (MASP), putative               | 0,1963 | 0,5703  |
| TcCLB.511603.200 | mucin TcMUCII, putative                                         | 0,1961 | 0,7302  |
| TcCLB.509267.3   | receptor-type adenylate cyclase, putative                       | 0,1961 | 0,7454  |
| TcCLB.508379.20  | hypothetical protein, conserved                                 | 0,1958 | 0,5119  |
| TcCLB.508811.10  | hypothetical protein                                            | 0,1957 | 0,1737  |
| TcCLB.508837.74  | small GTP-binding protein Rab18, putative                       | 0,1957 | 0,1843  |
| TcCLB.506257.10  | DNA/RNA non-specific endonuclease protein-like, putative        | 0,1955 | 0,32    |
| TcCLB.510693.280 | mucin-associated surface protein (MASP), putative               | 0,1955 | 0,5078  |
| TcCLB.508125.22  | mucin TcMUCII (pseudogene), putative                            | 0,1955 | 0,6788  |
| TcCLB.510799.30  | hypothetical protein, conserved                                 | 0,1954 | 0,1584  |
| TcCLB.511717.140 | hypothetical protein, conserved                                 | 0,1954 | 0,2524  |
| TcCLB.508591.10  | dispersed gene family protein 1 (DGF-1), putative               | 0,1954 | 0,4342  |
| TcCLB.507603.120 | hypothetical protein, conserved                                 | 0,1953 | 0,08978 |
| TcCLB.504153.210 | hypothetical protein                                            | 0,1953 | 0,3845  |
| TcCLB.508759.30  | mucin TcMUC (pseudogene), putative                              | 0,1952 | 0,7904  |
| TcCLB.505987.30  | hypothetical protein, conserved                                 | 0,1951 | 0,1921  |
| TcCLB.506903.50  | dispersed gene family protein 1 (DGF-1, pseudogene), putative   | 0,1951 | 0,3273  |
| TcCLB.508229.20  | hypothetical protein                                            | 0,1951 | 0,7526  |
| TcCLB.511255.130 | mucin-associated surface protein (MASP), putative               | 0,195  | 0,7141  |
| TcCLB.510911.40  | hypothetical protein, conserved                                 | 0,1947 | 0,4087  |
| TcCLB.508355.230 | hypothetical protein                                            | 0,1947 | 0,436   |
| TcCLB.507801.40  | hypothetical protein, conserved                                 | 0,1947 | 0,4916  |
| TcCLB.509599.100 | hypothetical protein                                            | 0,1946 | 0,4414  |
| TcCLB.503809.75  | hypothetical protein, conserved                                 | 0,1945 | 0,3989  |
| TcCLB.506465.40  | protein kinase-like protein, putative                           | 0,1944 | 0,3502  |
| TcCLB.503905.50  | hypothetical protein, conserved                                 | 0,1942 | 0,367   |
| TcCLB.510441.41  | trans-sialidase (pseudogene), putative                          | 0,1941 | 0,1887  |
| TcCLB.506755.120 | hypothetical protein, conserved                                 | 0,194  | 0,0754  |
| TcCLB.506999.70  | chaperone DNAJ protein, putative                                | 0,194  | 0,1487  |

|                  |                                                           |        |          |
|------------------|-----------------------------------------------------------|--------|----------|
| TcCLB.503583.100 | hypothetical protein, conserved                           | 0,194  | 0,3227   |
| TcCLB.511863.30  | hypothetical protein, conserved                           | 0,1939 | 0,2178   |
| TcCLB.510409.39  | ubiquitin/ribosomal protein S27a, putative                | 0,1938 | 0,0104   |
| TcCLB.504765.15  | succinyl-coA:3-ketoacid-coenzyme A transferase (pseudoge  | 0,1934 | 0,4766   |
| TcCLB.506957.90  | 60S ribosomal protein L18a, putative                      | 0,1932 | 0,009229 |
| TcCLB.505009.40  | hypothetical protein, conserved                           | 0,1932 | 0,2005   |
| TcCLB.510303.30  | hypothetical protein, conserved                           | 0,193  | 0,07939  |
| TcCLB.507093.184 | hypothetical protein, conserved                           | 0,193  | 0,142    |
| TcCLB.511261.50  | hypothetical protein, conserved                           | 0,1928 | 0,2354   |
| TcCLB.510769.170 | trans-sialidase (pseudogene), putative                    | 0,1928 | 0,3678   |
| TcCLB.511305.20  | hypothetical protein, conserved                           | 0,1926 | 0,07094  |
| TcCLB.509103.20  | tubulin-tyrosine ligase, putative                         | 0,1925 | 0,2335   |
| TcCLB.511255.690 | mucin-associated surface protein (MASP), putative         | 0,1925 | 0,6151   |
| TcCLB.508543.110 | hypothetical protein, conserved                           | 0,1924 | 0,1531   |
| TcCLB.511705.10  | receptor-type adenylate cyclase, putative                 | 0,1924 | 0,2256   |
| TcCLB.507765.100 | hypothetical protein, conserved                           | 0,1924 | 0,2798   |
| TcCLB.508799.110 | protein kinase, putative                                  | 0,1924 | 0,2808   |
| TcCLB.507499.50  | hypothetical protein, conserved (pseudogene)              | 0,1924 | 0,3493   |
| TcCLB.511383.89  | Flagellar Member 3 (FLAM3)                                | 0,1922 | 0,2267   |
| TcCLB.511807.3   | N-acetyltransferase complex ARD1 subunit (pseudogene),    | 0,1922 | 0,4599   |
| TcCLB.509993.51  | mucin-associated surface protein (MASP, pseudogene), pu   | 0,1922 | 0,6944   |
| TcCLB.507519.40  | hypothetical protein                                      | 0,1921 | 0,1531   |
| TcCLB.510339.7   | hypothetical protein, conserved (fragment)                | 0,1921 | 0,2253   |
| TcCLB.506767.123 | syntaxin binding protein (pseudogene), putative           | 0,192  | 0,783    |
| TcCLB.507485.30  | hypothetical protein, conserved                           | 0,1919 | 0,4057   |
| TcCLB.508409.50  | hypothetical protein, conserved                           | 0,1917 | 0,1765   |
| TcCLB.508607.60  | beta galactofuranosyl glycosyltransferase, putative       | 0,1916 | 0,5035   |
| TcCLB.505163.40  | hypothetical protein, conserved                           | 0,1913 | 0,3383   |
| TcCLB.508033.60  | mucin TcMUCII, putative                                   | 0,1912 | 0,6891   |
| TcCLB.506961.90  | retrotransposon hot spot (RHS) protein, putative          | 0,1911 | 0,1363   |
| TcCLB.511577.80  | hypothetical protein, conserved                           | 0,1911 | 0,1456   |
| TcCLB.511497.10  | hypothetical protein, conserved                           | 0,1911 | 0,4644   |
| TcCLB.509625.30  | hypothetical protein, conserved                           | 0,191  | 0,2848   |
| TcCLB.504229.44  | hypothetical protein, conserved (pseudogene)              | 0,1909 | 0,3183   |
| TcCLB.511283.80  | hypothetical protein, conserved                           | 0,1908 | 0,04512  |
| TcCLB.510719.40  | hypothetical protein, conserved                           | 0,1907 | 0,3002   |
| TcCLB.510719.300 | metallo-peptidase, Clan MC, Family M14, putative          | 0,1905 | 0,09842  |
| TcCLB.508955.10  | syntaxin, putative                                        | 0,1904 | 0,3625   |
| TcCLB.506251.10  | hypothetical protein, conserved                           | 0,1903 | 0,2072   |
| TcCLB.508225.20  | retrotransposon hot spot protein (RHS, pseudogene), putat | 0,1903 | 0,6303   |
| TcCLB.511303.120 | hypothetical protein, conserved                           | 0,1901 | 0,04112  |
| TcCLB.508175.80  | protein kinase, putative                                  | 0,19   | 0,0383   |
| TcCLB.509897.110 | trans-sialidase, Group V, putative                        | 0,19   | 0,4392   |
| TcCLB.511553.130 | mucin TcMUCII, putative                                   | 0,1899 | 0,6192   |
| TcCLB.508149.10  | dispersed gene family protein 1 (DGF-1), putative         | 0,1899 | 0,6204   |

|                  |                                                           |        |          |
|------------------|-----------------------------------------------------------|--------|----------|
| TcCLB.511001.120 | 60S ribosomal protein L18a, putative                      | 0,1898 | 0,006914 |
| TcCLB.511069.20  | 40S ribosomal protein S8, putative                        | 0,1897 | 0,07351  |
| TcCLB.511821.80  | hypothetical protein, conserved                           | 0,1897 | 0,2094   |
| TcCLB.504867.110 | hypothetical protein, conserved                           | 0,1896 | 0,2758   |
| TcCLB.510241.124 | hypothetical protein, conserved                           | 0,1895 | 0,09462  |
| TcCLB.507949.40  | hypothetical protein, conserved                           | 0,1895 | 0,1429   |
| TcCLB.506275.60  | zinc carboxypeptidase, putative                           | 0,1895 | 0,1468   |
| TcCLB.510553.20  | trans-sialidase (pseudogene), putative                    | 0,1895 | 0,6372   |
| TcCLB.509719.53  | hypothetical protein, conserved                           | 0,1893 | 0,1286   |
| TcCLB.509057.20  | importin alpha, putative                                  | 0,1892 | 0,03071  |
| TcCLB.507079.10  | hypothetical protein, conserved                           | 0,1892 | 0,2262   |
| TcCLB.506573.70  | hypothetical protein, conserved                           | 0,1892 | 0,3408   |
| TcCLB.507711.190 | hypothetical protein, conserved                           | 0,189  | 0,02992  |
| TcCLB.510007.60  | hypothetical protein, conserved                           | 0,189  | 0,08997  |
| TcCLB.509157.279 | Chaperonin HSP60, mitochondrial (HSP60)                   | 0,189  | 0,4008   |
| TcCLB.508057.20  | mucin-associated surface protein (MASP, pseudogene), pu   | 0,1889 | 0,437    |
| TcCLB.510107.30  | mucin-associated surface protein (MASP), putative         | 0,1889 | 0,6351   |
| TcCLB.507081.20  | hypothetical protein, conserved                           | 0,1888 | 0,1375   |
| TcCLB.511431.10  | protein kinase, putative                                  | 0,1888 | 0,4452   |
| TcCLB.404975.30  | trans-sialidase (pseudogene), putative                    | 0,1888 | 0,5755   |
| TcCLB.508461.30  | 3-demethylubiquinone-9 3-methyltransferase, putative      | 0,1887 | 0,1832   |
| TcCLB.511183.60  | trans-sialidase, Group V, putative                        | 0,1887 | 0,5953   |
| TcCLB.503617.20  | kinetoplast DNA-associated protein, putative              | 0,1885 | 0,046    |
| TcCLB.511353.4   | choline/carnitine O-acyltransferase, putative             | 0,1885 | 0,2421   |
| TcCLB.506885.340 | Mitochondrial import receptor subunit ATOM40, putative (  | 0,1884 | 0,05932  |
| TcCLB.508323.20  | hypothetical protein, conserved                           | 0,188  | 0,06834  |
| TcCLB.506247.430 | hypothetical protein, conserved                           | 0,188  | 0,1902   |
| TcCLB.511051.80  | DNA/RNA non-specific endonuclease protein-like, putative  | 0,1879 | 0,3305   |
| TcCLB.510657.30  | Sorting nexin-4 (ATG24)                                   | 0,1877 | 0,08039  |
| TcCLB.507993.320 | RNA-binding protein 27, putative (RBP27)                  | 0,1877 | 0,209    |
| TcCLB.504257.9   | RNA-binding protein 42 (RNA-binding motif protein 42), pu | 0,1875 | 0,251    |
| TcCLB.506391.30  | ef-hand protein 5, putative                               | 0,1873 | 0,2394   |
| TcCLB.503909.19  | dispersed gene family protein 1 (DGF-1), putative (fragme | 0,1873 | 0,5274   |
| TcCLB.510767.20  | 60S ribosomal protein L36, putative                       | 0,1872 | 0,06861  |
| TcCLB.510359.604 | mucin TcMUCII (pseudogene), putative                      | 0,187  | 0,6268   |
| TcCLB.506297.150 | 40S ribosomal protein S5, putative                        | 0,1869 | 0,03815  |
| TcCLB.509979.51  | zinc carboxypeptidase, putative                           | 0,1869 | 0,6895   |
| TcCLB.509985.50  | PrimPol-like protein 1, putative (ppl1)                   | 0,1868 | 0,1688   |
| TcCLB.506195.270 | hypothetical protein, conserved                           | 0,1867 | 0,1555   |
| TcCLB.507521.70  | cyclophilin, putative                                     | 0,1867 | 0,2112   |
| TcCLB.510221.30  | hypothetical protein, conserved                           | 0,1866 | 0,05803  |
| TcCLB.510121.180 | hypothetical protein, conserved                           | 0,1865 | 0,2314   |
| TcCLB.504777.30  | surface protease GP63 (pseudogene), putative              | 0,1865 | 0,5635   |
| TcCLB.510377.390 | mucin-associated surface protein (MASP), putative         | 0,1865 | 0,7318   |
| TcCLB.506559.400 | hypothetical protein, conserved                           | 0,1864 | 0,2353   |

|                  |                                                         |        |         |
|------------------|---------------------------------------------------------|--------|---------|
| TcCLB.420495.19  | hypothetical protein, conserved (pseudogene)            | 0,1864 | 0,5879  |
| TcCLB.507717.9   | hypothetical protein, conserved                         | 0,1863 | 0,361   |
| TcCLB.508661.40  | hypothetical protein, conserved                         | 0,1862 | 0,2798  |
| TcCLB.511593.80  | mucin-associated surface protein (MASP), putative       | 0,186  | 0,5227  |
| TcCLB.508461.490 | 60S ribosomal protein L23, putative                     | 0,1859 | 0,01836 |
| TcCLB.508879.160 | hypothetical protein, conserved                         | 0,1859 | 0,09247 |
| TcCLB.508965.94  | hypothetical protein, conserved                         | 0,1859 | 0,2014  |
| TcCLB.508389.130 | mucin-associated surface protein (MASP), putative       | 0,1859 | 0,8556  |
| TcCLB.507091.100 | trans-sialidase (pseudogene), putative                  | 0,1858 | 0,5396  |
| TcCLB.504125.10  | SWI/SNF-related matrix-associated actin-dependent regul | 0,1856 | 0,158   |
| TcCLB.504425.110 | permease-like protein, putative                         | 0,1856 | 0,319   |
| TcCLB.510667.90  | hypothetical protein, conserved                         | 0,1855 | 0,1755  |
| TcCLB.504069.40  | hypothetical protein, conserved                         | 0,1855 | 0,193   |
| TcCLB.510575.170 | hypothetical protein, conserved                         | 0,1855 | 0,2174  |
| TcCLB.511439.20  | lipase, putative                                        | 0,1855 | 0,4696  |
| TcCLB.511757.100 | trans-sialidase, putative (fragment)                    | 0,1854 | 0,3116  |
| TcCLB.508153.184 | 60S ribosomal protein L39, putative                     | 0,1853 | 0,1088  |
| TcCLB.504137.60  | beta adaptin, putative                                  | 0,1853 | 0,1457  |
| TcCLB.411235.9   | alpha tubulin, putative                                 | 0,185  | 0,03028 |
| TcCLB.504187.21  | trans-sialidase (pseudogene), putative                  | 0,185  | 0,5457  |
| TcCLB.415187.10  | hypothetical protein, conserved                         | 0,1849 | 0,6178  |
| TcCLB.504037.30  | 60S ribosomal protein L12, putative                     | 0,1848 | 0,0384  |
| TcCLB.508207.10  | glycine dehydrogenase (pseudogene), putative            | 0,1848 | 0,2787  |
| TcCLB.509611.30  | hypothetical protein                                    | 0,1847 | 0,1727  |
| TcCLB.509147.21  | hypothetical protein, conserved (pseudogene)            | 0,1847 | 0,569   |
| TcCLB.506963.20  | 60S ribosomal protein L34, putative                     | 0,1843 | 0,02424 |
| TcCLB.503923.40  | hypothetical protein, conserved                         | 0,1843 | 0,5417  |
| TcCLB.511903.130 | 60S ribosomal protein L26, putative                     | 0,1842 | 0,01547 |
| TcCLB.509067.50  | hypothetical protein, conserved                         | 0,1842 | 0,1041  |
| TcCLB.503925.10  | hypothetical protein, conserved                         | 0,1841 | 0,2557  |
| TcCLB.510901.250 | hypothetical protein, conserved                         | 0,184  | 0,204   |
| TcCLB.506901.60  | mucin TcMUCII, putative                                 | 0,184  | 0,7936  |
| TcCLB.510119.70  | protein kinase, putative                                | 0,1837 | 0,3878  |
| TcCLB.506769.120 | mucin-associated surface protein (MASP), putative       | 0,1837 | 0,6972  |
| TcCLB.511099.70  | mucin TcMUCII, putative                                 | 0,1837 | 0,793   |
| TcCLB.510371.141 | hypothetical protein, conserved (pseudogene)            | 0,1835 | 0,8508  |
| TcCLB.506925.60  | hypothetical protein, conserved                         | 0,1833 | 0,3467  |
| TcCLB.509437.125 | trans-sialidase (pseudogene), putative                  | 0,1833 | 0,6344  |
| TcCLB.510483.90  | trans-sialidase (pseudogene), putative                  | 0,1833 | 0,6466  |
| TcCLB.503727.10  | centrin, putative                                       | 0,1831 | 0,2321  |
| TcCLB.411427.40  | hypothetical protein, conserved                         | 0,1831 | 0,4801  |
| TcCLB.511613.10  | mucin-associated surface protein (MASP), putative       | 0,1831 | 0,6126  |
| TcCLB.506329.9   | mucin-associated surface protein (MASP, pseudogene), pu | 0,1831 | 0,7974  |
| TcCLB.508707.330 | chaperone DNAJ protein, putative                        | 0,183  | 0,2346  |
| TcCLB.507049.199 | pumilio protein, putative                               | 0,1829 | 0,6217  |

|                  |                                                           |        |         |
|------------------|-----------------------------------------------------------|--------|---------|
| TcCLB.506727.80  | hypothetical protein, conserved                           | 0,1827 | 0,2135  |
| TcCLB.505071.100 | phosphatidylglycerolphosphate synthase, mitochondrial, pu | 0,1826 | 0,1867  |
| TcCLB.504431.109 | cytochrome b5, putative                                   | 0,1826 | 0,3365  |
| TcCLB.506247.310 | hypothetical protein, conserved                           | 0,1825 | 0,08163 |
| TcCLB.510895.9   | hypothetical protein, conserved (fragment)                | 0,1824 | 0,07438 |
| TcCLB.509213.110 | hypothetical protein, conserved                           | 0,1824 | 0,1047  |
| TcCLB.511259.70  | mucin-associated surface protein (MASP, pseudogene), pu   | 0,1824 | 0,6438  |
| TcCLB.504423.30  | hypothetical protein, conserved                           | 0,1823 | 0,2152  |
| TcCLB.506201.30  | serine/threonine-protein phosphatase PP1 beta             | 0,1822 | 0,1844  |
| TcCLB.507687.70  | mucin-associated surface protein (MASP), putative         | 0,182  | 0,7177  |
| TcCLB.510015.30  | mucin-associated surface protein (MASP), putative         | 0,1819 | 0,3898  |
| TcCLB.509287.50  | glucose-6-phosphate 1-dehydrogenase, putative             | 0,1816 | 0,1314  |
| TcCLB.508567.49  | hypothetical protein, conserved                           | 0,1816 | 0,4625  |
| TcCLB.507729.30  | trans-sialidase (pseudogene), putative                    | 0,1816 | 0,5027  |
| TcCLB.506945.240 | ATP synthase, epsilon chain, putative                     | 0,1815 | 0,1232  |
| TcCLB.504769.190 | trans-sialidase (pseudogene), putative                    | 0,1815 | 0,5434  |
| TcCLB.509461.90  | inositol 1,4,5-trisphosphate receptor, putative (IP3R)    | 0,1814 | 0,01193 |
| TcCLB.511133.30  | hypothetical protein, conserved                           | 0,1814 | 0,08063 |
| TcCLB.507603.170 | hypothetical protein, conserved                           | 0,1814 | 0,1908  |
| TcCLB.509753.140 | mucin-associated surface protein (MASP), putative         | 0,1814 | 0,6946  |
| TcCLB.511173.470 | trans-sialidase, Group V, putative                        | 0,181  | 0,6432  |
| TcCLB.511277.490 | hypothetical protein, conserved                           | 0,1809 | 0,0899  |
| TcCLB.511763.10  | hypothetical protein, conserved                           | 0,1809 | 0,3843  |
| TcCLB.506211.107 | hypothetical protein, conserved                           | 0,1809 | 0,4588  |
| TcCLB.507093.180 | transcription factor IIIb, putative                       | 0,1808 | 0,1635  |
| TcCLB.507023.180 | protein kinase, putative                                  | 0,1808 | 0,1715  |
| TcCLB.503663.10  | septum formation inhibitor, Maf-like protein, putative    | 0,1806 | 0,4189  |
| TcCLB.509941.85  | trans-sialidase (pseudogene), putative                    | 0,1804 | 0,3429  |
| TcCLB.506155.110 | hypothetical protein, conserved                           | 0,1803 | 0,2112  |
| TcCLB.511921.50  | trans-sialidase, Group VI, putative                       | 0,1803 | 0,5207  |
| TcCLB.506941.238 | hypothetical protein, conserved                           | 0,1802 | 0,293   |
| TcCLB.506067.290 | mucin-associated surface protein (MASP), putative         | 0,1802 | 0,573   |
| TcCLB.506471.110 | retrotransposon hot spot protein (RHS, pseudogene), putat | 0,1798 | 0,2047  |
| TcCLB.509809.20  | chaperone DNAJ protein, putative                          | 0,1798 | 0,2706  |
| TcCLB.507961.10  | mucin-associated surface protein (MASP, pseudogene), pu   | 0,1798 | 0,7118  |
| TcCLB.506865.60  | hypothetical protein, conserved                           | 0,1796 | 0,08342 |
| TcCLB.508465.20  | hypothetical protein, conserved                           | 0,1796 | 0,2417  |
| TcCLB.509569.40  | hypothetical protein, conserved                           | 0,1795 | 0,08263 |
| TcCLB.506559.517 | hypothetical protein, conserved                           | 0,1795 | 0,1497  |
| TcCLB.507907.40  | hypothetical protein, conserved                           | 0,1793 | 0,2245  |
| TcCLB.506187.50  | mucin-associated surface protein (MASP), putative         | 0,1793 | 0,7267  |
| TcCLB.503979.10  | ethanolamine phosphotransferase, putative (fragment)      | 0,1791 | 0,154   |
| TcCLB.504069.80  | ATP synthase F1 subunit gamma protein, putative (ATPF1C   | 0,1789 | 0,1591  |
| TcCLB.509561.39  | hypothetical protein, conserved                           | 0,1789 | 0,282   |
| TcCLB.506173.219 | trans-sialidase (pseudogene), putative                    | 0,1788 | 0,6966  |



|                  |                                                            |        |         |
|------------------|------------------------------------------------------------|--------|---------|
| TcCLB.503455.20  | hypothetical protein, conserved                            | 0,1786 | 0,264   |
| TcCLB.506637.120 | hypothetical protein, conserved                            | 0,1784 | 0,07424 |
| TcCLB.511277.200 | RNA-binding protein, putative                              | 0,1783 | 0,7792  |
| TcCLB.508919.60  | ADP-ribosylation factor, putative (ARL-1)                  | 0,1782 | 0,3611  |
| TcCLB.511647.44  | hypothetical protein, conserved                            | 0,1781 | 0,4599  |
| TcCLB.507513.70  | 40S ribosomal protein S16, putative                        | 0,178  | 0,04545 |
| TcCLB.504175.9   | hypothetical protein, conserved                            | 0,178  | 0,081   |
| TcCLB.506635.139 | kasal-type serpin (pseudogene), putative                   | 0,178  | 0,2183  |
| TcCLB.506777.30  | hypothetical protein, conserved                            | 0,1779 | 0,1051  |
| TcCLB.508515.150 | trans-sialidase, Group VIII, putative                      | 0,1779 | 0,5643  |
| TcCLB.507689.20  | hypothetical protein                                       | 0,1776 | 0,3909  |
| TcCLB.509993.15  | mucin-associated surface protein (MASP, pseudogene), pu    | 0,1776 | 0,4816  |
| TcCLB.508547.190 | hypothetical protein, conserved                            | 0,1775 | 0,2356  |
| TcCLB.511629.20  | hypothetical protein, conserved                            | 0,1775 | 0,2593  |
| TcCLB.509921.51  | hypothetical protein, conserved (pseudogene)               | 0,1775 | 0,5639  |
| TcCLB.506735.10  | mitochondrial processing peptidase alpha subunit, putative | 0,1774 | 0,07659 |
| TcCLB.508897.100 | dynein light chain, putative                               | 0,1773 | 0,3442  |
| TcCLB.507047.120 | myo-inositol-1(or 4)-monophosphatase 1, putative           | 0,1772 | 0,3539  |
| TcCLB.456021.10  | hypothetical protein, conserved (fragment)                 | 0,177  | 0,5713  |
| TcCLB.510889.100 | hypothetical protein, conserved                            | 0,1769 | 0,2724  |
| TcCLB.503479.20  | hypothetical protein, conserved (pseudogene)               | 0,1768 | 0,4825  |
| TcCLB.509195.80  | trans-sialidase (pseudogene), putative                     | 0,1768 | 0,483   |
| TcCLB.511825.50  | centrin-4, putative (Centrin4)                             | 0,1766 | 0,117   |
| TcCLB.509693.70  | hypoxanthine-guanine phosphoribosyltransferase, putative   | 0,1766 | 0,3225  |
| TcCLB.511529.30  | hypothetical protein, conserved                            | 0,1766 | 0,3438  |
| TcCLB.510579.70  | nascent polypeptide associated complex subunit, putative   | 0,1763 | 0,04212 |
| TcCLB.511071.100 | Glycerophosphoryl diester phosphodiesterase family, putat  | 0,1763 | 0,1696  |
| TcCLB.511491.100 | phosphatase 2C, putative                                   | 0,1761 | 0,1699  |
| TcCLB.508827.79  | 40S ribosomal protein S17, putative                        | 0,176  | 0,04922 |
| TcCLB.510659.180 | hypothetical protein, conserved                            | 0,176  | 0,1957  |
| TcCLB.509549.15  | mucin TcMUCII (pseudogene), putative                       | 0,176  | 0,7696  |
| TcCLB.510749.10  | hypothetical protein, conserved                            | 0,1759 | 0,2134  |
| TcCLB.510463.90  | mucin-associated surface protein (MASP), putative          | 0,1759 | 0,9141  |
| TcCLB.506609.15  | hypothetical protein (pseudogene)                          | 0,1758 | 0,7116  |
| TcCLB.511261.80  | hypothetical protein, conserved                            | 0,1756 | 0,1182  |
| TcCLB.511903.10  | hypothetical protein                                       | 0,1756 | 0,5688  |
| TcCLB.506723.20  | trans-sialidase, Group VII, putative                       | 0,1755 | 0,4156  |
| TcCLB.506399.20  | hypothetical protein, conserved                            | 0,1754 | 0,2582  |
| TcCLB.506659.39  | protein phosphatase 2C, putative                           | 0,1754 | 0,5809  |
| TcCLB.506287.90  | hypothetical protein, conserved                            | 0,1753 | 0,2413  |
| TcCLB.510779.10  | tryptophanyl-tRNA synthetase (pseudogene), putative        | 0,1753 | 0,4486  |
| TcCLB.503849.40  | mucin-associated surface protein (MASP), putative          | 0,1752 | 0,6232  |
| TcCLB.506871.160 | RNA guanylyltransferase, putative                          | 0,175  | 0,1233  |
| TcCLB.505807.54  | hypothetical protein, conserved                            | 0,175  | 0,3612  |
| TcCLB.508175.320 | hypothetical protein, conserved                            | 0,1749 | 0,1422  |

|                  |                                                              |        |         |
|------------------|--------------------------------------------------------------|--------|---------|
| TcCLB.509303.20  | glycine dehydrogenase [decarboxylating] (pseudogene), pu     | 0,1749 | 0,5038  |
| TcCLB.506175.20  | hypothetical protein, conserved                              | 0,1748 | 0,09268 |
| TcCLB.506993.190 | hypothetical protein                                         | 0,1748 | 0,7922  |
| TcCLB.510339.14  | hypothetical protein, conserved                              | 0,1747 | 0,2379  |
| TcCLB.508761.270 | mucin-associated surface protein (MASP), putative            | 0,1745 | 0,596   |
| TcCLB.509151.90  | hypothetical protein, conserved                              | 0,1744 | 0,19    |
| TcCLB.509587.20  | squalene monooxygenase, putative (fragment)                  | 0,1743 | 0,1922  |
| TcCLB.510733.40  | hypothetical protein, conserved                              | 0,1743 | 0,2477  |
| TcCLB.508641.40  | retrotransposon hot spot protein (RHS, pseudogene), putat    | 0,1743 | 0,5997  |
| TcCLB.509443.30  | AUT2/APG4/ATG4 cysteine peptidase, putative                  | 0,1741 | 0,3906  |
| TcCLB.506321.140 | mucin-associated surface protein (MASP), putative            | 0,174  | 0,5985  |
| TcCLB.486465.9   | cysteine peptidase, Clan CA, family C51, putative            | 0,174  | 0,6045  |
| TcCLB.510577.50  | rhomboid-like protein, putative                              | 0,1739 | 0,05165 |
| TcCLB.511657.20  | protein kinase, putative                                     | 0,1739 | 0,2259  |
| TcCLB.509419.150 | mucin-associated surface protein (MASP), putative            | 0,1739 | 0,6543  |
| TcCLB.509825.30  | hypothetical protein, conserved                              | 0,1738 | 0,2567  |
| TcCLB.508399.49  | dispersed gene family protein 1 (DGF-1), putative            | 0,1737 | 0,395   |
| TcCLB.424889.10  | UDP-Gal or UDP-GlcNAc-dependent glycosyltransferase, pu      | 0,1736 | 0,8154  |
| TcCLB.511165.40  | acidocalcisomal pyrophosphatase, putative                    | 0,1735 | 0,1352  |
| TcCLB.503501.70  | mucin-associated surface protein (MASP), putative (fragm     | 0,1735 | 0,6845  |
| TcCLB.508355.120 | hypothetical protein, conserved                              | 0,1734 | 0,1639  |
| TcCLB.511711.100 | hypothetical protein, conserved                              | 0,1734 | 0,2545  |
| TcCLB.509831.50  | intraflagellar transport protein 88, putative (fragment) (IF | 0,1733 | 0,3172  |
| TcCLB.509793.10  | kinetoplast-associated protein 4 (KAP4)                      | 0,1733 | 0,3618  |
| TcCLB.511725.40  | hypothetical protein, conserved                              | 0,1732 | 0,3317  |
| TcCLB.508151.5   | mucin-associated surface protein (MASP, pseudogene), pu      | 0,1732 | 0,8483  |
| TcCLB.506937.30  | 60S ribosomal protein L14, putative                          | 0,173  | 0,08984 |
| TcCLB.508423.20  | hypothetical protein, conserved (pseudogene)                 | 0,173  | 0,1061  |
| TcCLB.473633.9   | dispersed gene family protein 1 (DGF-1), putative (fragme    | 0,1729 | 0,6031  |
| TcCLB.511667.40  | retrotransposon hot spot (RHS) protein, putative             | 0,1728 | 0,527   |
| TcCLB.511511.170 | ADP-ribosylation factor-like protein, putative               | 0,1727 | 0,2816  |
| TcCLB.510731.40  | katanin, putative                                            | 0,1727 | 0,3342  |
| TcCLB.507523.10  | trans-sialidase, putative                                    | 0,1727 | 0,5634  |
| TcCLB.509033.100 | hypothetical protein, conserved                              | 0,1726 | 0,1874  |
| TcCLB.506309.60  | trans-sialidase, Group V, putative                           | 0,1726 | 0,866   |
| TcCLB.510355.110 | hypothetical protein, conserved (pseudogene)                 | 0,1725 | 0,5022  |
| TcCLB.511283.300 | hypothetical protein, conserved                              | 0,1724 | 0,2029  |
| TcCLB.506861.20  | hypothetical protein, conserved                              | 0,1721 | 0,2049  |
| TcCLB.503791.49  | vacuolar protein sorting-associated protein, putative (fragr | 0,1721 | 0,3719  |
| TcCLB.504787.90  | mucin-associated surface protein (MASP, pseudogene), pu      | 0,1721 | 0,5591  |
| TcCLB.508157.20  | mucin-associated surface protein (MASP), putative            | 0,1721 | 0,6227  |
| TcCLB.506799.50  | mucin-associated surface protein (MASP), putative            | 0,172  | 0,4302  |
| TcCLB.508211.70  | hypothetical protein, conserved                              | 0,1719 | 0,2307  |
| TcCLB.478671.9   | hypothetical protein, conserved                              | 0,1718 | 0,176   |
| TcCLB.506297.320 | hypothetical protein                                         | 0,1718 | 0,2401  |

|                  |                                                            |        |         |
|------------------|------------------------------------------------------------|--------|---------|
| TcCLB.507993.200 | hypothetical protein, conserved                            | 0,1717 | 0,1236  |
| TcCLB.511589.250 | hypothetical protein, conserved                            | 0,1716 | 0,2615  |
| TcCLB.508873.250 | mucin-associated surface protein (MASP), putative          | 0,1715 | 0,5489  |
| TcCLB.506131.170 | trans-sialidase, Group V, putative                         | 0,1715 | 0,6955  |
| TcCLB.506975.30  | amidohydrolase, putative                                   | 0,1714 | 0,2213  |
| TcCLB.508605.20  | UDP-Gal or UDP-GlcNAc-dependent glycosyltransferase, pu    | 0,1713 | 0,6237  |
| TcCLB.504261.30  | trans-sialidase (pseudogene), putative                     | 0,1713 | 0,7233  |
| TcCLB.509617.30  | mismatch repair protein MSH5, putative                     | 0,1711 | 0,324   |
| TcCLB.507515.100 | hypothetical protein, conserved                            | 0,1711 | 0,4289  |
| TcCLB.506245.160 | retrotransposon hot spot (RHS) protein, putative           | 0,1711 | 0,6241  |
| TcCLB.504741.210 | hypothetical protein, conserved                            | 0,171  | 0,1566  |
| TcCLB.506123.40  | nucleolar RNA helicase II, putative                        | 0,1708 | 0,09123 |
| TcCLB.509899.40  | trans-sialidase (pseudogene), putative                     | 0,1708 | 0,4703  |
| TcCLB.506789.260 | hypothetical protein, conserved                            | 0,1708 | 0,4956  |
| TcCLB.506821.170 | aquaporin-like protein, putative                           | 0,1707 | 0,187   |
| TcCLB.503581.39  | coatomer delta subunit, putative                           | 0,1707 | 0,2462  |
| TcCLB.507991.40  | hypothetical protein                                       | 0,1707 | 0,2907  |
| TcCLB.507017.150 | AUT2/APG4/ATG4 cysteine peptidase, putative                | 0,1707 | 0,3382  |
| TcCLB.506101.20  | trans-sialidase (pseudogene), putative                     | 0,1707 | 0,5409  |
| TcCLB.509381.29  | hypothetical protein, conserved                            | 0,1706 | 0,1987  |
| TcCLB.510629.450 | hypothetical protein, conserved                            | 0,1706 | 0,3208  |
| TcCLB.476733.29  | serine-threonine dehydratase, putative                     | 0,1706 | 0,647   |
| TcCLB.511167.70  | DNA repair and recombination helicase protein PIF2, putat  | 0,1705 | 0,3465  |
| TcCLB.509753.194 | mucin-associated surface protein (MASP), putative          | 0,1704 | 0,8194  |
| TcCLB.510123.10  | hypothetical protein, conserved                            | 0,1703 | 0,2262  |
| TcCLB.507825.30  | Present in the outer mitochondrial membrane proteome 2f    | 0,1701 | 0,1352  |
| TcCLB.506599.315 | hypothetical protein, conserved (pseudogene)               | 0,1701 | 0,6847  |
| TcCLB.509295.110 | dispersed gene family protein 1 (DGF-1, pseudogene), puta  | 0,1699 | 0,7371  |
| TcCLB.511149.199 | mucin TcMUCII (pseudogene), putative                       | 0,1698 | 0,8092  |
| TcCLB.503815.29  | hypothetical protein, conserved                            | 0,1697 | 0,5473  |
| TcCLB.504827.130 | eukaryotic translation initiation factor 4 gamma, putative | 0,1696 | 0,1858  |
| TcCLB.506489.50  | serine/threonine protein kinase, putative                  | 0,1695 | 0,3713  |
| TcCLB.506413.20  | 40S ribosomal protein S33, putative                        | 0,1694 | 0,1114  |
| TcCLB.505943.50  | hypothetical protein, conserved                            | 0,1694 | 0,2358  |
| TcCLB.509267.60  | NADH-ubiquinone oxidoreductase complex I subunit, putati   | 0,1694 | 0,3787  |
| TcCLB.507913.39  | glutaminyl-tRNA synthetase, putative                       | 0,1692 | 0,4386  |
| TcCLB.507797.18  | serine/threonine protein kinase, putative                  | 0,1691 | 0,376   |
| TcCLB.510911.14  | hypothetical protein, conserved                            | 0,169  | 0,2128  |
| TcCLB.509259.140 | glycine dehydrogenase [decarboxylating] (pseudogene), pu   | 0,169  | 0,3108  |
| TcCLB.509161.80  | hypothetical protein, conserved                            | 0,1689 | 0,3159  |
| TcCLB.507007.40  | hypothetical protein, conserved                            | 0,1689 | 0,3377  |
| TcCLB.511521.9   | hypothetical protein, conserved                            | 0,1689 | 0,4959  |
| TcCLB.509979.365 | surface protease GP63 (pseudogene), putative               | 0,1689 | 0,7462  |
| TcCLB.508461.510 | 60S ribosomal protein L27A/L29, putative                   | 0,1688 | 0,2134  |
| TcCLB.507711.290 | hypothetical protein, conserved                            | 0,1687 | 0,342   |

|                  |                                                               |        |          |
|------------------|---------------------------------------------------------------|--------|----------|
| TcCLB.511367.180 | hypothetical protein                                          | 0,1682 | 0,154    |
| TcCLB.508355.100 | diacylglycerol acyltransferase, putative                      | 0,168  | 0,1073   |
| TcCLB.509927.10  | trans-sialidase, putative (fragment)                          | 0,168  | 0,4176   |
| TcCLB.503697.130 | hypothetical protein, conserved                               | 0,1677 | 0,1114   |
| TcCLB.506681.24  | hypothetical protein, conserved                               | 0,1677 | 0,2522   |
| TcCLB.511367.360 | elongation factor 1-alpha, putative                           | 0,1676 | 0,008648 |
| TcCLB.506569.50  | expression site-associated gene (ESAG-like) protein, putative | 0,1675 | 0,8456   |
| TcCLB.510351.60  | hypothetical protein, conserved                               | 0,1674 | 0,4371   |
| TcCLB.511287.120 | 40S ribosomal protein S2, putative                            | 0,1673 | 0,03823  |
| TcCLB.508911.60  | hypothetical protein, conserved                               | 0,1673 | 0,1274   |
| TcCLB.506821.120 | hypothetical protein, conserved                               | 0,1673 | 0,3797   |
| TcCLB.510897.6   | Dynein light chain LC6, flagellar outer arm, putative         | 0,1672 | 0,3421   |
| TcCLB.505025.60  | 90 kDa surface protein, putative                              | 0,1672 | 0,7747   |
| TcCLB.507011.60  | structural maintenance of chromosome (SMC) family protein     | 0,1671 | 0,07401  |
| TcCLB.511625.20  | hypothetical protein, conserved                               | 0,1671 | 0,3894   |
| TcCLB.511071.90  | hypothetical protein                                          | 0,167  | 0,5957   |
| TcCLB.511871.120 | mucin-associated surface protein (MASP), putative             | 0,167  | 0,6443   |
| TcCLB.503647.20  | hypothetical protein, conserved                               | 0,1669 | 0,5026   |
| TcCLB.508593.140 | hypothetical protein, conserved                               | 0,1668 | 0,1801   |
| TcCLB.506097.9   | dynein heavy chain, putative (fragment)                       | 0,1668 | 0,2358   |
| TcCLB.506555.9   | hypothetical protein, conserved (fragment)                    | 0,1668 | 0,3787   |
| TcCLB.508547.110 | ATP-dependent DEAD/H RNA helicase, putative                   | 0,1667 | 0,0977   |
| TcCLB.504427.140 | hypothetical protein, conserved                               | 0,1667 | 0,2275   |
| TcCLB.437575.18  | transporter, putative                                         | 0,1666 | 0,5321   |
| TcCLB.510483.230 | mucin-associated surface protein (MASP), putative             | 0,1664 | 0,7438   |
| TcCLB.510903.80  | retrotransposon hot spot protein (RHS, pseudogene), putative  | 0,1663 | 0,05412  |
| TcCLB.511903.250 | hypothetical protein, conserved                               | 0,1663 | 0,3231   |
| TcCLB.507029.30  | heat shock 70 kDa protein, mitochondrial precursor, putative  | 0,1662 | 0,08374  |
| TcCLB.510329.160 | hypothetical protein, conserved                               | 0,1659 | 0,0749   |
| TcCLB.506217.10  | hypothetical protein                                          | 0,1659 | 0,6547   |
| TcCLB.508469.59  | helicase, putative                                            | 0,1657 | 0,2703   |
| TcCLB.506365.20  | retrotransposon hot spot protein (RHS, pseudogene), putative  | 0,1656 | 0,08894  |
| TcCLB.504149.124 | conserved protein, unknown function                           | 0,1655 | 0,1882   |
| TcCLB.510359.10  | hypothetical protein, conserved                               | 0,1655 | 0,4097   |
| TcCLB.503679.10  | aspartate aminotransferase, putative                          | 0,1655 | 0,4641   |
| TcCLB.507769.40  | GTP-binding protein, putative                                 | 0,1654 | 0,2096   |
| TcCLB.505989.70  | surface protease GP63, putative                               | 0,1653 | 0,3413   |
| TcCLB.510681.30  | lipase, putative                                              | 0,1652 | 0,2899   |
| TcCLB.510731.10  | trans-sialidase, putative                                     | 0,1652 | 0,8895   |
| TcCLB.507637.150 | mucin-associated surface protein (MASP, pseudogene), putative | 0,1651 | 0,5616   |
| TcCLB.511415.11  | retrotransposon hot spot (RHS) protein, putative (fragment)   | 0,165  | 0,4275   |
| TcCLB.507071.230 | trans-sialidase, Group V, putative                            | 0,165  | 0,65     |
| TcCLB.508365.200 | mucin-associated surface protein (MASP), putative             | 0,1648 | 0,8373   |
| TcCLB.506961.110 | hypothetical protein, conserved (pseudogene)                  | 0,1647 | 0,1524   |
| TcCLB.510047.10  | hypothetical protein, conserved                               | 0,1647 | 0,1914   |

|                  |                                                           |        |         |
|------------------|-----------------------------------------------------------|--------|---------|
| TcCLB.506743.190 | hypothetical protein, conserved                           | 0,1647 | 0,3746  |
| TcCLB.503583.40  | trans-splicing factor, putative                           | 0,1645 | 0,2921  |
| TcCLB.510205.80  | mucin-associated surface protein (MASP), putative         | 0,1645 | 0,7284  |
| TcCLB.508363.10  | hypothetical protein                                      | 0,1645 | 0,7911  |
| TcCLB.507513.50  | heat shock 70 kDa protein, putative                       | 0,1644 | 0,1231  |
| TcCLB.509171.90  | splicing factor 3a, putative                              | 0,1644 | 0,2064  |
| TcCLB.510899.19  | hypothetical protein, conserved                           | 0,1644 | 0,4797  |
| TcCLB.425839.10  | kinesin, putative                                         | 0,1644 | 0,4937  |
| TcCLB.506767.240 | mucin-associated surface protein (MASP), putative         | 0,1644 | 0,687   |
| TcCLB.511909.40  | Succinate dehydrogenase [ubiquinone] flavoprotein subuni  | 0,1642 | 0,08094 |
| TcCLB.508299.80  | threonyl-tRNA synthetase, putative                        | 0,1642 | 0,1311  |
| TcCLB.508461.50  | hypothetical protein                                      | 0,1641 | 0,4203  |
| TcCLB.506469.40  | hypothetical protein, conserved                           | 0,1641 | 0,4765  |
| TcCLB.506337.70  | 2-oxoglutarate dehydrogenase E1 component, putative       | 0,164  | 0,02866 |
| TcCLB.509841.10  | trans-sialidase, putative                                 | 0,164  | 0,799   |
| TcCLB.506529.60  | hypothetical protein, conserved                           | 0,1637 | 0,4438  |
| TcCLB.506905.59  | SNF2 DNA repair protein, putative (fragment)              | 0,1635 | 0,1684  |
| TcCLB.507027.40  | hypothetical protein, conserved                           | 0,1635 | 0,3859  |
| TcCLB.510045.20  | ABC transporter, putative                                 | 0,1635 | 0,4247  |
| TcCLB.509875.90  | retrotransposon hot spot protein (RHS, pseudogene), putat | 0,1635 | 0,5659  |
| TcCLB.504131.20  | hypothetical protein, conserved                           | 0,1634 | 0,09499 |
| TcCLB.478071.10  | trans-sialidase (pseudogene), putative                    | 0,1633 | 0,3575  |
| TcCLB.507099.120 | hypothetical protein, conserved                           | 0,1631 | 0,112   |
| TcCLB.510077.20  | trans-sialidase (pseudogene), putative                    | 0,1631 | 0,2034  |
| TcCLB.503501.30  | surface protease GP63 (pseudogene), putative              | 0,1629 | 0,8181  |
| TcCLB.505023.10  | trans-sialidase (pseudogene), putative                    | 0,1628 | 0,4887  |
| TcCLB.511259.220 | mucin-associated surface protein (MASP), putative         | 0,1628 | 0,7138  |
| TcCLB.506573.91  | coatomer delta subunit, putative                          | 0,1628 | 0,7222  |
| TcCLB.510629.460 | hypothetical protein                                      | 0,1627 | 0,1584  |
| TcCLB.510575.150 | hypothetical protein, conserved                           | 0,1626 | 0,18    |
| TcCLB.509965.220 | hypothetical protein, conserved                           | 0,1624 | 0,1723  |
| TcCLB.506633.30  | hypothetical protein, conserved                           | 0,1624 | 0,2428  |
| TcCLB.509959.198 | ATP-dependent DEAD/H RNA helicase (pseudogene), putat     | 0,1624 | 0,7455  |
| TcCLB.509671.10  | hypothetical protein, conserved                           | 0,1623 | 0,09317 |
| TcCLB.511277.340 | paralyzed flagella protein 20 (PF20)                      | 0,1623 | 0,1559  |
| TcCLB.509445.30  | solanesyl-diphosphate synthase (SPPS)                     | 0,1622 | 0,07351 |
| TcCLB.507059.30  | retrotransposon hot spot protein (RHS, pseudogene), putat | 0,1622 | 0,4174  |
| TcCLB.510573.10  | actin 2, putative (fragment)                              | 0,1621 | 0,1244  |
| TcCLB.508441.70  | enoyl-CoA hydratase/Enoyl-CoA isomerase/3-hydroxyacyl-(   | 0,1621 | 0,1457  |
| TcCLB.507611.398 | RNA editing complex protein MP63, putative (fragment)     | 0,1621 | 0,1499  |
| TcCLB.507831.40  | hypothetical protein, conserved                           | 0,1621 | 0,3089  |
| TcCLB.507001.120 | hypothetical protein, conserved                           | 0,1621 | 0,4174  |
| TcCLB.508631.40  | hypothetical protein, conserved (pseudogene)              | 0,162  | 0,2713  |
| TcCLB.503945.20  | hypothetical protein, conserved                           | 0,162  | 0,5407  |
| TcCLB.506763.270 | hypothetical protein, conserved (pseudogene)              | 0,162  | 0,6577  |

|                  |                                                           |        |         |
|------------------|-----------------------------------------------------------|--------|---------|
| TcCLB.508999.269 | hypothetical protein, conserved (fragment)                | 0,1619 | 0,3929  |
| TcCLB.508273.50  | hypothetical protein, conserved                           | 0,1618 | 0,3461  |
| TcCLB.506501.141 | syntaxin binding protein (pseudogene), putative           | 0,1618 | 0,7932  |
| TcCLB.507099.30  | Ran-binding protein 1, putative                           | 0,1617 | 0,1552  |
| TcCLB.508641.180 | RNA-binding protein 38, putative (RBP38)                  | 0,1616 | 0,1419  |
| TcCLB.508375.20  | trans-sialidase, Group V, putative                        | 0,1616 | 0,4476  |
| TcCLB.508161.50  | trans-sialidase, putative                                 | 0,1615 | 0,7374  |
| TcCLB.510361.240 | mucin-associated surface protein (MASP, pseudogene), pu   | 0,1615 | 0,7616  |
| TcCLB.508181.60  | hypothetical protein, conserved                           | 0,1612 | 0,1256  |
| TcCLB.506227.50  | hypothetical protein, conserved                           | 0,1612 | 0,375   |
| TcCLB.511685.40  | hypothetical protein                                      | 0,1611 | 0,2884  |
| TcCLB.510729.100 | hypothetical protein, conserved                           | 0,1609 | 0,1902  |
| TcCLB.506113.90  | retrotransposon hot spot protein (RHS, pseudogene), putat | 0,1609 | 0,2356  |
| TcCLB.511367.370 | elongation factor 1-alpha, putative                       | 0,1608 | 0,01189 |
| TcCLB.508799.190 | hypothetical protein, conserved                           | 0,1608 | 0,1643  |
| TcCLB.509779.60  | dual-specificity protein phosphatase, putative            | 0,1608 | 0,7837  |
| TcCLB.507641.233 | ribosomal protein L37, putative                           | 0,1605 | 0,1057  |
| TcCLB.507993.300 | hypothetical protein, conserved                           | 0,1605 | 0,376   |
| TcCLB.506223.40  | hypothetical protein, conserved                           | 0,1604 | 0,3155  |
| TcCLB.504131.30  | ubiquitin-activating enzyme, putative                     | 0,1603 | 0,27    |
| TcCLB.511129.80  | UDP-Gal or UDP-GlcNAc-dependent glycosyltransferase, pi   | 0,1603 | 0,5601  |
| TcCLB.506679.250 | ribosomal protein L24, putative                           | 0,1602 | 0,08945 |
| TcCLB.507537.30  | cysteinyl-tRNA synthetase, putative                       | 0,1602 | 0,1035  |
| TcCLB.511301.10  | oxidoreductase-like protein, putative                     | 0,1602 | 0,5485  |
| TcCLB.510693.240 | trans-sialidase, Group VI, putative                       | 0,1602 | 0,6884  |
| TcCLB.508387.110 | hypothetical protein, conserved                           | 0,1601 | 0,3032  |
| TcCLB.506963.30  | hypothetical protein, conserved                           | 0,1601 | 0,396   |
| TcCLB.510729.280 | trans-sialidase, Group III, putative                      | 0,1601 | 0,4398  |
| TcCLB.511391.140 | alpha-adaptin-like, putative                              | 0,16   | 0,1942  |
| TcCLB.510535.80  | hypothetical protein, conserved                           | 0,1599 | 0,5184  |
| TcCLB.510275.340 | mucin-associated surface protein (MASP, pseudogene), pu   | 0,1599 | 0,612   |
| TcCLB.506279.100 | hypothetical protein                                      | 0,1598 | 0,5948  |
| TcCLB.503919.40  | hypothetical protein, conserved                           | 0,1597 | 0,158   |
| TcCLB.510855.4   | hypothetical protein, conserved                           | 0,1597 | 0,3088  |
| TcCLB.508457.40  | hypothetical protein                                      | 0,1597 | 0,4164  |
| TcCLB.511311.30  | trans-sialidase, Group II, putative                       | 0,1596 | 0,5576  |
| TcCLB.503633.21  | mucin TcMUCII (pseudogene), putative                      | 0,1596 | 0,834   |
| TcCLB.509791.80  | hypothetical protein                                      | 0,1595 | 0,108   |
| TcCLB.511589.10  | ATP synthase, putative                                    | 0,1595 | 0,2315  |
| TcCLB.509805.150 | hypothetical protein, conserved                           | 0,1594 | 0,227   |
| TcCLB.508407.10  | membrane associated protein, putative                     | 0,1594 | 0,3518  |
| TcCLB.510025.260 | mucin-associated surface protein (MASP), putative         | 0,1594 | 0,6483  |
| TcCLB.511607.90  | mucin-associated surface protein (MASP, pseudogene), pu   | 0,1592 | 0,6423  |
| TcCLB.506625.180 | hypothetical protein, conserved                           | 0,1591 | 0,2672  |
| TcCLB.509017.20  | hypothetical protein, conserved                           | 0,1591 | 0,2987  |

|                  |                                                          |        |         |
|------------------|----------------------------------------------------------|--------|---------|
| TcCLB.506053.60  | hypothetical protein (fragment)                          | 0,159  | 0,4057  |
| TcCLB.503771.10  | mucin-associated surface protein (MASP), putative        | 0,159  | 0,8905  |
| TcCLB.511071.160 | hypothetical protein, conserved                          | 0,1589 | 0,3741  |
| TcCLB.510597.20  | hypothetical protein, conserved                          | 0,1589 | 0,4242  |
| TcCLB.507799.10  | mannosyl-oligosaccharide 1,2-alpha-mannosidase IB, puta  | 0,1589 | 0,6706  |
| TcCLB.508859.90  | phosphatidylinositol 3-kinase 2, putative                | 0,1588 | 0,2798  |
| TcCLB.503735.30  | hypothetical protein, conserved                          | 0,1588 | 0,284   |
| TcCLB.506349.40  | glycine dehydrogenase [decarboxylating] (pseudogene), pu | 0,1587 | 0,7453  |
| TcCLB.508547.140 | hypothetical protein, conserved                          | 0,1586 | 0,3454  |
| TcCLB.503453.40  | 60S ribosomal protein L30, putative                      | 0,1586 | 0,4902  |
| TcCLB.510955.20  | hypothetical protein, conserved                          | 0,1585 | 0,1982  |
| TcCLB.506419.60  | nucleoporin (NUP54/57), putative                         | 0,1585 | 0,2087  |
| TcCLB.510571.20  | leucine-rich repeat protein 1 (LRRP1), putative          | 0,1585 | 0,45    |
| TcCLB.507057.20  | hypothetical protein, conserved                          | 0,1584 | 0,3486  |
| TcCLB.510257.70  | hypothetical protein, conserved                          | 0,1583 | 0,1655  |
| TcCLB.509399.90  | hypothetical protein                                     | 0,1583 | 0,4246  |
| TcCLB.509575.4   | trans-sialidase, putative (fragment)                     | 0,1583 | 0,7066  |
| TcCLB.511261.150 | hypothetical protein, conserved                          | 0,1582 | 0,4297  |
| TcCLB.506605.220 | hypothetical protein, conserved                          | 0,1581 | 0,3048  |
| TcCLB.510021.50  | mucin-associated surface protein (MASP), putative        | 0,1577 | 0,7838  |
| TcCLB.509797.9   | hypothetical protein, conserved (pseudogene)             | 0,1576 | 0,3068  |
| TcCLB.505757.10  | hypothetical protein, conserved                          | 0,1576 | 0,4908  |
| TcCLB.506337.150 | hypothetical protein, conserved                          | 0,1575 | 0,3729  |
| TcCLB.511131.40  | hypothetical protein                                     | 0,1575 | 0,4122  |
| TcCLB.511807.280 | hypothetical protein, conserved                          | 0,1574 | 0,03092 |
| TcCLB.509765.95  | mucin-associated surface protein (MASP, pseudogene), pu  | 0,1572 | 0,5601  |
| TcCLB.507637.180 | mucin-associated surface protein (MASP, pseudogene), pu  | 0,1572 | 0,5838  |
| TcCLB.511677.20  | trans-sialidase, putative                                | 0,1572 | 0,8004  |
| TcCLB.506741.140 | mucin-associated surface protein (MASP), putative        | 0,1571 | 0,7532  |
| TcCLB.506267.19  | hypothetical protein                                     | 0,157  | 0,7058  |
| TcCLB.509999.130 | hypothetical protein, conserved                          | 0,1568 | 0,2186  |
| TcCLB.506211.160 | Mitochondrial ADP/ATP carrier protein 5, putative (MCP5) | 0,1566 | 0,2356  |
| TcCLB.509569.60  | hypothetical protein, conserved                          | 0,1566 | 0,3209  |
| TcCLB.509243.20  | hypothetical protein, conserved                          | 0,1566 | 0,6551  |
| TcCLB.506525.130 | mitochondrial carrier protein, putative                  | 0,1565 | 0,368   |
| TcCLB.507009.20  | hypothetical protein, conserved                          | 0,1565 | 0,5015  |
| TcCLB.510105.100 | UDP-glucose dehydrogenase, putative                      | 0,1564 | 0,2672  |
| TcCLB.506513.24  | hypothetical protein, conserved                          | 0,1563 | 0,3687  |
| TcCLB.508875.10  | hypothetical protein (fragment)                          | 0,1563 | 0,7502  |
| TcCLB.418221.10  | hypothetical protein, conserved                          | 0,1562 | 0,1857  |
| TcCLB.508985.10  | mucin-associated surface protein (MASP, pseudogene), pu  | 0,156  | 0,6002  |
| TcCLB.511257.40  | hypothetical protein, conserved                          | 0,1559 | 0,2565  |
| TcCLB.510091.30  | hypothetical protein, conserved                          | 0,1557 | 0,298   |
| TcCLB.509979.130 | hypothetical protein, conserved                          | 0,1556 | 0,1097  |
| TcCLB.506915.10  | hypothetical protein, conserved                          | 0,1556 | 0,1786  |

|                  |                                                         |        |        |
|------------------|---------------------------------------------------------|--------|--------|
| TcCLB.511529.200 | hypothetical protein, conserved                         | 0,1555 | 0,265  |
| TcCLB.509167.190 | protein kinase-like protein, putative                   | 0,1554 | 0,1243 |
| TcCLB.511715.80  | hypothetical protein, conserved                         | 0,1554 | 0,2739 |
| TcCLB.508111.20  | hypothetical protein, conserved                         | 0,1552 | 0,2945 |
| TcCLB.511805.15  | ribosomal protein S29, putative                         | 0,1552 | 0,7333 |
| TcCLB.506679.230 | ribosomal protein L24, putative                         | 0,1551 | 0,1118 |
| TcCLB.503663.4   | hypothetical protein, conserved (fragment)              | 0,1551 | 0,5197 |
| TcCLB.503981.9   | hypothetical protein, conserved (pseudogene)            | 0,155  | 0,4665 |
| TcCLB.507771.114 | hypothetical protein, conserved                         | 0,155  | 0,6237 |
| TcCLB.506965.130 | mucin-associated surface protein (MASP), putative       | 0,1549 | 0,6167 |
| TcCLB.503521.39  | mitochondrial carrier protein, putative                 | 0,1548 | 0,4437 |
| TcCLB.506443.20  | hypothetical protein, conserved                         | 0,1547 | 0,3971 |
| TcCLB.511627.159 | hypothetical protein, conserved (fragment)              | 0,1547 | 0,5319 |
| TcCLB.503973.150 | mucin-associated surface protein (MASP), putative       | 0,1547 | 0,7919 |
| TcCLB.511419.30  | hypothetical protein, conserved                         | 0,1545 | 0,4476 |
| TcCLB.435051.10  | trans-sialidase, putative (fragment)                    | 0,1545 | 0,8037 |
| TcCLB.504429.50  | trans-sialidase (pseudogene), putative                  | 0,1544 | 0,4995 |
| TcCLB.506523.9   | dispersed gene family protein 1 (DGF-1), putative       | 0,1544 | 0,6762 |
| TcCLB.508013.50  | mucin TcMUCII, putative                                 | 0,1544 | 0,8342 |
| TcCLB.511001.200 | hypothetical protein, conserved                         | 0,1543 | 0,3587 |
| TcCLB.509751.28  | mucin-associated surface protein (MASP, pseudogene), pu | 0,1541 | 0,2678 |
| TcCLB.506887.110 | hypothetical protein, conserved (pseudogene)            | 0,1541 | 0,4269 |
| TcCLB.508197.10  | 60S ribosomal protein L11, putative                     | 0,1539 | 0,0578 |
| TcCLB.508227.40  | mucin-associated surface protein (MASP), putative       | 0,1539 | 0,5563 |
| TcCLB.509177.20  | hypothetical protein                                    | 0,1537 | 0,3743 |
| TcCLB.511505.30  | hypothetical protein, conserved                         | 0,1537 | 0,498  |
| TcCLB.506367.160 | hypothetical protein, conserved                         | 0,1536 | 0,3174 |
| TcCLB.506633.20  | hypothetical protein, conserved                         | 0,1535 | 0,1951 |
| TcCLB.509047.119 | hypothetical protein, conserved (fragment)              | 0,1535 | 0,6199 |
| TcCLB.509885.70  | transporter, putative                                   | 0,1534 | 0,227  |
| TcCLB.503891.110 | dolicholphosphate-mannose synthase, putative            | 0,153  | 0,3943 |
| TcCLB.509911.130 | hypothetical protein, conserved                         | 0,1524 | 0,1711 |
| TcCLB.504141.20  | hypothetical protein, conserved                         | 0,1523 | 0,2843 |
| TcCLB.509767.120 | hypothetical protein, conserved                         | 0,1523 | 0,2872 |
| TcCLB.507049.5   | kynurenine aminotransferase (pseudogene), putative      | 0,152  | 0,3621 |
| TcCLB.506919.60  | hypothetical protein                                    | 0,152  | 0,7458 |
| TcCLB.511133.10  | hypothetical protein, conserved                         | 0,1518 | 0,5333 |
| TcCLB.510101.210 | hypothetical protein, conserved                         | 0,1516 | 0,2431 |
| TcCLB.504179.90  | hypothetical protein, conserved                         | 0,1516 | 0,2471 |
| TcCLB.506829.50  | hypothetical protein, conserved                         | 0,1516 | 0,4106 |
| TcCLB.506955.50  | trans-sialidase (pseudogene), putative                  | 0,1516 | 0,6178 |
| TcCLB.509399.80  | hypothetical protein, conserved                         | 0,1515 | 0,2691 |
| TcCLB.511277.170 | ATP-dependent zinc metallopeptidase, putative           | 0,1514 | 0,1195 |
| TcCLB.511109.70  | hypothetical protein, conserved                         | 0,1514 | 0,2117 |
| TcCLB.506825.160 | hypothetical protein, conserved                         | 0,1513 | 0,3505 |



|                  |                                                           |        |         |
|------------------|-----------------------------------------------------------|--------|---------|
| TcCLB.510751.30  | hypothetical protein                                      | 0,1512 | 0,3312  |
| TcCLB.441923.10  | UDP-Gal or UDP-GlcNAc-dependent glycosyltransferase, pu   | 0,151  | 0,5217  |
| TcCLB.506599.320 | hypothetical protein                                      | 0,151  | 0,8479  |
| TcCLB.508981.20  | hypothetical protein, conserved                           | 0,1509 | 0,4688  |
| TcCLB.511471.10  | hypothetical protein, conserved (pseudogene)              | 0,1509 | 0,5248  |
| TcCLB.511445.160 | copper-transporting ATPase-like protein, putative         | 0,1508 | 0,08115 |
| TcCLB.511421.200 | ARM-like helical domain-containing protein                | 0,1508 | 0,1843  |
| TcCLB.507911.33  | retrotransposon hot spot protein (RHS, pseudogene), putat | 0,1506 | 0,7498  |
| TcCLB.511541.20  | hypothetical protein                                      | 0,1505 | 0,2584  |
| TcCLB.511149.50  | mucin TcMUCII, putative                                   | 0,1504 | 0,7932  |
| TcCLB.506435.460 | hypothetical protein                                      | 0,1503 | 0,3563  |
| TcCLB.508471.10  | hypothetical protein, conserved                           | 0,1503 | 0,4487  |
| TcCLB.503701.9   | dispersed gene family protein 1 (DGF-1, pseudogene), puta | 0,1502 | 0,5908  |
| TcCLB.510303.180 | hypothetical protein, conserved                           | 0,1501 | 0,06841 |
| TcCLB.510297.90  | hypothetical protein, conserved                           | 0,15   | 0,159   |
| TcCLB.511671.30  | beta galactofuranosyl glycosyltransferase, putative       | 0,1499 | 0,7087  |
| TcCLB.508977.111 | elongation factor 1-gamma (EF-1-gamma, pseudogene), p     | 0,1496 | 0,6756  |
| TcCLB.503417.33  | hypothetical protein                                      | 0,1495 | 0,8278  |
| TcCLB.509665.13  | trans-sialidase (pseudogene), putative                    | 0,1494 | 0,6572  |
| TcCLB.510065.20  | DNA repair protein, putative                              | 0,1493 | 0,1821  |
| TcCLB.509717.80  | glyceraldehyde 3-phosphate dehydrogenase, cytosolic, puta | 0,1493 | 0,3432  |
| TcCLB.511871.10  | hypothetical protein, conserved                           | 0,1493 | 0,5292  |
| TcCLB.511555.110 | hypothetical protein, conserved                           | 0,1492 | 0,1536  |
| TcCLB.506885.60  | hypothetical protein, conserved                           | 0,1492 | 0,262   |
| TcCLB.506205.20  | hypothetical protein                                      | 0,1491 | 0,2433  |
| TcCLB.510687.140 | alkylated DNA repair protein, putative                    | 0,1491 | 0,2944  |
| TcCLB.510187.280 | hypothetical protein, conserved                           | 0,1491 | 0,3986  |
| TcCLB.503557.10  | hypothetical protein, conserved                           | 0,149  | 0,4849  |
| TcCLB.508977.10  | trans-sialidase, Group V, putative                        | 0,149  | 0,5472  |
| TcCLB.508325.310 | hypothetical protein, conserved                           | 0,149  | 0,5909  |
| TcCLB.509967.150 | hypothetical protein, conserved                           | 0,1489 | 0,2658  |
| TcCLB.511527.60  | hypothetical protein, conserved                           | 0,1489 | 0,3766  |
| TcCLB.510989.60  | hypothetical protein, conserved                           | 0,1488 | 0,2281  |
| TcCLB.506815.60  | 60S ribosomal protein L44 (RPL44)                         | 0,1487 | 0,09673 |
| TcCLB.503815.20  | lysyl-tRNA synthetase, putative                           | 0,1487 | 0,3507  |
| TcCLB.508163.120 | mucin-associated surface protein (MASP, pseudogene), pu   | 0,1487 | 0,6213  |
| TcCLB.511183.420 | mucin-associated surface protein (MASP, pseudogene), pu   | 0,1487 | 0,6747  |
| TcCLB.507001.14  | Present in the outer mitochondrial membrane proteome 8    | 0,1485 | 0,5116  |
| TcCLB.509023.10  | calcium binding protein EF hand, putative                 | 0,1482 | 0,1963  |
| TcCLB.507811.30  | ATP-dependent DEAD/H RNA helicase, putative               | 0,1482 | 0,2375  |
| TcCLB.510115.10  | trans-sialidase (pseudogene), putative                    | 0,1482 | 0,5335  |
| TcCLB.504121.39  | 60S ribosomal protein L14, putative (fragment)            | 0,1481 | 0,1368  |
| TcCLB.503703.30  | hypothetical protein, conserved                           | 0,148  | 0,3096  |
| TcCLB.511141.30  | protein kinase, putative                                  | 0,148  | 0,5866  |
| TcCLB.507069.180 | mucin-associated surface protein (MASP), putative         | 0,148  | 0,7834  |

|                  |                                                             |        |         |
|------------------|-------------------------------------------------------------|--------|---------|
| TcCLB.508641.230 | hypothetical protein, conserved                             | 0,1479 | 0,2357  |
| TcCLB.507165.20  | hypothetical protein, conserved                             | 0,1479 | 0,5907  |
| TcCLB.504051.30  | hypothetical protein, conserved                             | 0,1476 | 0,2956  |
| TcCLB.509561.50  | hypothetical protein, conserved                             | 0,1476 | 0,3809  |
| TcCLB.508011.120 | trans-sialidase (pseudogene), putative                      | 0,1475 | 0,7177  |
| TcCLB.506963.10  | 60S ribosomal protein L10a, putative                        | 0,1474 | 0,05363 |
| TcCLB.509167.40  | amino acid permease, putative                               | 0,1474 | 0,2869  |
| TcCLB.507047.160 | hypothetical protein, conserved                             | 0,1474 | 0,598   |
| TcCLB.506599.360 | mucin-associated surface protein (MASP, pseudogene), pu     | 0,1474 | 0,7505  |
| TcCLB.507041.30  | hypothetical protein, conserved                             | 0,1472 | 0,3847  |
| TcCLB.510431.170 | hypothetical protein, conserved                             | 0,1471 | 0,2968  |
| TcCLB.511501.50  | GTPase activating protein, putative                         | 0,1471 | 0,3069  |
| TcCLB.511267.30  | cholinephosphate cytidyltransferase A, putative             | 0,147  | 0,1949  |
| TcCLB.508891.50  | hypothetical protein                                        | 0,147  | 0,239   |
| TcCLB.507673.10  | serine/threonine-protein phosphatase PP1, putative          | 0,147  | 0,5219  |
| TcCLB.506605.174 | hypothetical protein, conserved                             | 0,147  | 0,5276  |
| TcCLB.506609.70  | mucin-associated surface protein (MASP), putative           | 0,147  | 0,7823  |
| TcCLB.506797.80  | hypothetical protein, conserved                             | 0,1469 | 0,4132  |
| TcCLB.508879.70  | hypothetical protein, conserved                             | 0,1468 | 0,4552  |
| TcCLB.507005.80  | hypothetical protein, conserved                             | 0,1467 | 0,536   |
| TcCLB.504493.10  | mucin-associated surface protein (MASP), putative (fragm    | 0,1467 | 0,8021  |
| TcCLB.506321.320 | suppressive immunomodulating factor, putative (TSIF)        | 0,1466 | 0,2232  |
| TcCLB.505997.200 | hypothetical protein, conserved                             | 0,1464 | 0,4123  |
| TcCLB.508815.100 | hypothetical protein, conserved                             | 0,1463 | 0,2326  |
| TcCLB.510119.9   | elongation factor 1-alpha, putative                         | 0,1462 | 0,03253 |
| TcCLB.510341.10  | hypothetical protein                                        | 0,1462 | 0,612   |
| TcCLB.511653.60  | hypothetical protein, conserved                             | 0,1461 | 0,4772  |
| TcCLB.511289.50  | mitogen-activated protein kinase 9, putative (MPK9)         | 0,1459 | 0,2949  |
| TcCLB.506131.190 | mucin-associated surface protein (MASP), putative           | 0,1459 | 0,7901  |
| TcCLB.503909.68  | hypothetical protein, conserved                             | 0,1458 | 0,4335  |
| TcCLB.505097.49  | expression site-associated gene (ESAG-like) protein, putati | 0,1457 | 0,7606  |
| TcCLB.510055.10  | trans-sialidase, putative                                   | 0,1456 | 0,5335  |
| TcCLB.509925.5   | trans-sialidase (pseudogene), putative                      | 0,1456 | 0,6915  |
| TcCLB.506375.70  | hypothetical protein, conserved                             | 0,1455 | 0,514   |
| TcCLB.506457.20  | hypothetical protein, conserved                             | 0,1454 | 0,4373  |
| TcCLB.506831.5   | hypothetical protein, conserved (fragment)                  | 0,1454 | 0,6574  |
| TcCLB.508405.40  | 40S ribosomal protein S11, putative                         | 0,1452 | 0,1335  |
| TcCLB.511167.90  | 14-3-3 protein 2, putative (14-3-3-II)                      | 0,1452 | 0,1796  |
| TcCLB.510487.50  | mucin-associated surface protein (MASP), putative           | 0,1451 | 0,7701  |
| TcCLB.508349.20  | tRNA nucleotidyltransferase, putative                       | 0,1448 | 0,2757  |
| TcCLB.510615.10  | hypothetical protein, conserved                             | 0,1447 | 0,2936  |
| TcCLB.510603.110 | hypothetical protein, conserved                             | 0,1447 | 0,5369  |
| TcCLB.503575.34  | ribosomal protein L38, putative                             | 0,1446 | 0,1898  |
| TcCLB.505957.80  | retrotransposon hot spot protein (RHS, pseudogene), putat   | 0,1446 | 0,4096  |
| TcCLB.506967.50  | mucin-associated surface protein (MASP), putative           | 0,1443 | 0,8092  |

|                   |                                                             |        |        |
|-------------------|-------------------------------------------------------------|--------|--------|
| TcCLB.511269.20   | Multisite-specific tRNA:(cytosine-C(5))-methyltransferase,  | 0,1441 | 0,2086 |
| TcCLB.506503.60   | hypothetical protein, conserved                             | 0,1441 | 0,2965 |
| TcCLB.506313.10   | retrotransposon hot spot (RHS) protein, putative (fragment) | 0,144  | 0,2723 |
| TcCLB.511181.130  | hypothetical protein                                        | 0,1438 | 0,385  |
| TcCLB.511745.60   | hypothetical protein                                        | 0,1438 | 0,71   |
| TcCLB.511907.240  | protein kinase, putative                                    | 0,1437 | 0,2274 |
| TcCLB.509171.29   | RNA pseudouridylate synthase, putative                      | 0,1436 | 0,3211 |
| TcCLB.510529.20   | hypothetical protein, conserved                             | 0,1436 | 0,333  |
| TcCLB.503953.10   | hypothetical protein, conserved                             | 0,1435 | 0,2294 |
| TcCLB.508231.204  | hypothetical protein, conserved                             | 0,1434 | 0,4974 |
| TcCLB.510643.130  | damage-specific DNA binding protein, putative               | 0,1433 | 0,1559 |
| TcCLB.511277.410  | hypothetical protein, conserved                             | 0,1433 | 0,2742 |
| TcCLB.504741.160  | ribosomal protein L11, putative                             | 0,1433 | 0,4455 |
| TcCLB.510967.30   | hypothetical protein                                        | 0,1432 | 0,6101 |
| TcCLB.505051.30   | tryptophanyl-tRNA synthetase, putative (fragment)           | 0,1429 | 0,8313 |
| TcCLB.511859.40   | hypothetical protein, conserved                             | 0,1427 | 0,5785 |
| TcCLB.506871.90   | hypothetical protein, conserved                             | 0,1426 | 0,1707 |
| TcCLB.510405.9    | hypothetical protein, conserved (fragment)                  | 0,1426 | 0,253  |
| TcCLB.511577.188  | hypothetical protein, conserved                             | 0,1426 | 0,4569 |
| TcCLB.508127.9    | hypothetical protein, conserved                             | 0,1424 | 0,2782 |
| TcCLB.506479.60   | kinesin heavy chain, putative                               | 0,1424 | 0,3124 |
| TcCLB.506789.330  | hypothetical protein, conserved                             | 0,1424 | 0,3622 |
| TcCLB.504121.30   | 60S ribosomal protein L4, putative                          | 0,1423 | 0,1062 |
| TcCLB.509011.54   | ubiquinol-cytochrome c reductase, putative                  | 0,1421 | 0,552  |
| TcCLB.506925.150  | protein phosphatase, putative                               | 0,142  | 0,2545 |
| TcCLB.508153.1080 | hypothetical protein, conserved                             | 0,142  | 0,4008 |
| TcCLB.504081.540  | trans-sialidase, Group V, putative                          | 0,142  | 0,7288 |
| TcCLB.406933.10   | retrotransposon hot spot (RHS) protein, putative            | 0,1419 | 0,5377 |
| TcCLB.504125.60   | Kinesin-13 3, putative (KIN13-3)                            | 0,1418 | 0,1212 |
| TcCLB.511797.167  | mucin-associated surface protein (MASP), putative           | 0,1417 | 0,8329 |
| TcCLB.506473.4    | hypothetical protein, conserved (pseudogene)                | 0,1417 | 0,8346 |
| TcCLB.506211.10   | lipoic acid synthetase, mitochondrial precursor, putative   | 0,1416 | 0,4226 |
| TcCLB.506869.40   | mitochondrial RNA binding complex 1 subunit, putative       | 0,1415 | 0,3205 |
| TcCLB.511927.30   | hypothetical protein, conserved                             | 0,1414 | 0,627  |
| TcCLB.511211.230  | hypothetical protein, conserved                             | 0,1412 | 0,2637 |
| TcCLB.506605.160  | histone acetyltransferase, putative                         | 0,1412 | 0,3221 |
| TcCLB.508889.10   | hypothetical protein, conserved                             | 0,1411 | 0,318  |
| TcCLB.509127.80   | hypothetical protein, conserved                             | 0,1411 | 0,5517 |
| TcCLB.507895.170  | hypothetical protein, conserved                             | 0,1409 | 0,3592 |
| TcCLB.511599.90   | mucin-associated surface protein (MASP), putative           | 0,1409 | 0,7844 |
| TcCLB.510373.90   | mucin-associated surface protein (MASP), putative           | 0,1408 | 0,7691 |
| TcCLB.508851.70   | hypothetical protein                                        | 0,1407 | 0,404  |
| TcCLB.511277.550  | hypothetical protein, conserved                             | 0,1407 | 0,5639 |
| TcCLB.510279.160  | trans-sialidase (pseudogene), putative                      | 0,1405 | 0,765  |
| TcCLB.508827.70   | 40S ribosomal protein S17, putative                         | 0,1404 | 0,1692 |

|                  |                                                            |        |         |
|------------------|------------------------------------------------------------|--------|---------|
| TcCLB.506529.200 | hypothetical protein, conserved                            | 0,1404 | 0,3337  |
| TcCLB.503563.10  | calcium-translocating P-type ATPase, putative              | 0,1404 | 0,4098  |
| TcCLB.510089.210 | hypothetical protein, conserved                            | 0,1402 | 0,391   |
| TcCLB.507817.40  | hypothetical protein, conserved                            | 0,1402 | 0,494   |
| TcCLB.508819.50  | katanin, putative (fragment)                               | 0,14   | 0,5238  |
| TcCLB.511465.30  | hypothetical protein, conserved                            | 0,14   | 0,554   |
| TcCLB.447255.10  | hypothetical protein, conserved                            | 0,1399 | 0,333   |
| TcCLB.506537.280 | glycine dehydrogenase [decarboxylating] (pseudogene), pu   | 0,1399 | 0,3486  |
| TcCLB.507929.10  | kinesin, putative (fragment)                               | 0,1398 | 0,3307  |
| TcCLB.511277.450 | GPI-anchor transamidase subunit 8, putative (GPI8)         | 0,1396 | 0,3313  |
| TcCLB.504147.90  | hypothetical protein, conserved                            | 0,1396 | 0,3479  |
| TcCLB.510659.219 | hypothetical protein, conserved                            | 0,1396 | 0,4452  |
| TcCLB.506625.130 | hypothetical protein, conserved                            | 0,1396 | 0,6551  |
| TcCLB.506513.180 | hypothetical protein, conserved                            | 0,1395 | 0,3239  |
| TcCLB.508777.90  | ATP-dependent DNA helicase, putative                       | 0,1395 | 0,3255  |
| TcCLB.503827.94  | chitin binding-like protein (pseudogene), putative         | 0,1395 | 0,8281  |
| TcCLB.507519.110 | 60S ribosomal protein L7, putative                         | 0,1394 | 0,08721 |
| TcCLB.511263.50  | hypothetical protein, conserved                            | 0,1394 | 0,6498  |
| TcCLB.510941.20  | hypothetical protein, conserved                            | 0,1393 | 0,3973  |
| TcCLB.503599.50  | hypothetical protein, conserved                            | 0,1393 | 0,5015  |
| TcCLB.506537.110 | hypothetical protein, conserved                            | 0,1393 | 0,5685  |
| TcCLB.506321.190 | mucin TcMUCII, putative                                    | 0,1393 | 0,7821  |
| TcCLB.511901.30  | Glycerophosphoryl diester phosphodiesterase family, putat  | 0,1392 | 0,3042  |
| TcCLB.508873.425 | elongation factor 1-gamma (EF-1-gamma, pseudogene), p      | 0,1392 | 0,5045  |
| TcCLB.506351.70  | hypothetical protein, conserved                            | 0,1391 | 0,2712  |
| TcCLB.511277.614 | hypothetical protein                                       | 0,1391 | 0,6895  |
| TcCLB.507911.50  | hypothetical protein, conserved                            | 0,139  | 0,4202  |
| TcCLB.508919.189 | dispersed gene family protein 1 (DGF-1), putative          | 0,139  | 0,5193  |
| TcCLB.410797.10  | surface protease GP63, putative                            | 0,1389 | 0,4333  |
| TcCLB.506691.80  | hypothetical protein, conserved                            | 0,1388 | 0,2907  |
| TcCLB.510903.10  | tRNA pseudouridine synthase, putative                      | 0,1388 | 0,4755  |
| TcCLB.507629.30  | hypothetical protein, conserved                            | 0,1387 | 0,3198  |
| TcCLB.503697.100 | hypothetical protein, conserved                            | 0,1386 | 0,172   |
| TcCLB.511861.90  | retrotransposon hot spot (RHS) protein, putative           | 0,1386 | 0,4447  |
| TcCLB.507031.120 | metallo- peptidase, Clan MG, Family M24                    | 0,1385 | 0,2809  |
| TcCLB.507027.80  | hypothetical protein, conserved                            | 0,1385 | 0,2943  |
| TcCLB.509471.40  | hypothetical protein, conserved                            | 0,1384 | 0,4418  |
| TcCLB.511671.149 | phosphate transporter, putative (PHO91)                    | 0,1383 | 0,3675  |
| TcCLB.510719.10  | vacuolar protein sorting-associated protein-like, putative | 0,1382 | 0,2695  |
| TcCLB.448567.9   | dynein heavy chain, putative                               | 0,1382 | 0,4428  |
| TcCLB.509039.49  | hypothetical protein, conserved                            | 0,138  | 0,6255  |
| TcCLB.508471.19  | hypothetical protein, conserved (fragment)                 | 0,1379 | 0,2201  |
| TcCLB.506341.40  | hypothetical protein                                       | 0,1379 | 0,7976  |
| TcCLB.504033.180 | hypothetical protein, conserved                            | 0,1376 | 0,1188  |
| TcCLB.510963.10  | DNA damage repair protein, putative                        | 0,1375 | 0,2715  |

|                  |                                                               |        |        |
|------------------|---------------------------------------------------------------|--------|--------|
| TcCLB.509259.130 | protein kinase, putative                                      | 0,1375 | 0,8307 |
| TcCLB.506127.30  | phenylalanyl-tRNA synthetase, putative                        | 0,1372 | 0,1199 |
| TcCLB.503733.30  | hypothetical protein, conserved                               | 0,1372 | 0,3829 |
| TcCLB.506821.50  | hypothetical protein                                          | 0,1371 | 0,5659 |
| TcCLB.506045.19  | dispersed gene family protein 1 (DGF-1), putative (fragme     | 0,1371 | 0,595  |
| TcCLB.505035.10  | hypothetical protein                                          | 0,137  | 0,4661 |
| TcCLB.510929.10  | trans-sialidase, putative                                     | 0,137  | 0,8385 |
| TcCLB.504115.90  | retrotransposon hot spot protein (RHS, pseudogene), putat     | 0,1369 | 0,5009 |
| TcCLB.509679.9   | leucyl-tRNA synthetase, putative                              | 0,1368 | 0,495  |
| TcCLB.506793.20  | hypothetical protein, conserved                               | 0,1367 | 0,2882 |
| TcCLB.511063.100 | trans-sialidase (pseudogene), putative                        | 0,1367 | 0,7825 |
| TcCLB.508699.20  | Translation initiation factor eIF-2B subunit epsilon, putativ | 0,1366 | 0,2063 |
| TcCLB.505999.50  | hypothetical protein, conserved                               | 0,1366 | 0,5294 |
| TcCLB.504035.149 | kinesin, putative                                             | 0,1365 | 0,4034 |
| TcCLB.504105.110 | hypothetical protein, conserved                               | 0,1363 | 0,1495 |
| TcCLB.509831.36  | guide RNA-binding protein of 21 kDa (gBP21)                   | 0,1362 | 0,2317 |
| TcCLB.510089.190 | hypothetical protein, conserved                               | 0,1362 | 0,3067 |
| TcCLB.507205.10  | mucin-associated surface protein (MASP, pseudogene), pu       | 0,1362 | 0,7861 |
| TcCLB.506355.80  | flagellum transition zone component, putative                 | 0,136  | 0,1042 |
| TcCLB.507083.10  | hypothetical protein, conserved                               | 0,1359 | 0,2067 |
| TcCLB.504059.30  | hypothetical protein, conserved                               | 0,1358 | 0,1784 |
| TcCLB.509053.60  | hypothetical protein, conserved                               | 0,1358 | 0,605  |
| TcCLB.509233.10  | hypothetical protein                                          | 0,1357 | 0,8784 |
| TcCLB.460757.10  | receptor-type adenylate cyclase, putative                     | 0,1356 | 0,6263 |
| TcCLB.510595.58  | hypothetical protein, conserved                               | 0,1356 | 0,7063 |
| TcCLB.509165.40  | 60S acidic ribosomal protein P2 beta (H6.4), putative (P2-b   | 0,1355 | 0,148  |
| TcCLB.507513.60  | 40S ribosomal protein S16, putative                           | 0,1355 | 0,1803 |
| TcCLB.506435.160 | hypothetical protein, conserved                               | 0,1355 | 0,2583 |
| TcCLB.510665.60  | hypothetical protein, conserved (pseudogene)                  | 0,1355 | 0,3585 |
| TcCLB.509287.100 | mucin TcMUCII, putative                                       | 0,1353 | 0,6394 |
| TcCLB.508241.130 | hypothetical protein, conserved                               | 0,1352 | 0,161  |
| TcCLB.511391.80  | hypothetical protein                                          | 0,1352 | 0,7226 |
| TcCLB.510489.36  | mucin-associated surface protein (MASP, pseudogene), pu       | 0,1351 | 0,7622 |
| TcCLB.419637.9   | dispersed gene family protein 1 (DGF-1), putative             | 0,1351 | 0,849  |
| TcCLB.438147.9   | hypothetical protein, conserved (fragment)                    | 0,1349 | 0,5163 |
| TcCLB.511523.60  | hypothetical protein, conserved                               | 0,1348 | 0,2857 |
| TcCLB.506337.30  | class-E vacuolar protein-sorting protein 24 (Vps24p), putat   | 0,1348 | 0,4008 |
| TcCLB.507481.20  | retrotransposon hot spot protein (RHS, pseudogene), putat     | 0,1348 | 0,5783 |
| TcCLB.506409.60  | hypothetical protein                                          | 0,1346 | 0,8729 |
| TcCLB.508963.30  | trans-sialidase, Group VIII, putative                         | 0,1344 | 0,6432 |
| TcCLB.509967.120 | intraflagellar transport protein 172, putative                | 0,1343 | 0,1628 |
| TcCLB.506961.70  | trans-sialidase (pseudogene), putative                        | 0,1342 | 0,6077 |
| TcCLB.504787.60  | mucin TcMUCII (pseudogene), putative                          | 0,1342 | 0,7493 |
| TcCLB.508461.270 | rab7 GTP binding protein, putative                            | 0,134  | 0,1672 |
| TcCLB.511727.240 | hypothetical protein                                          | 0,134  | 0,3438 |

|                  |                                                             |        |         |
|------------------|-------------------------------------------------------------|--------|---------|
| TcCLB.509897.200 | trans-sialidase, Group V, putative                          | 0,134  | 0,5702  |
| TcCLB.510543.130 | ATP-dependent DEAD/H RNA helicase (pseudogene), putat       | 0,134  | 0,7707  |
| TcCLB.506919.130 | retrotransposon hot spot protein (RHS, pseudogene), putat   | 0,1338 | 0,7873  |
| TcCLB.508817.60  | ribosomal protein S26, putative                             | 0,1337 | 0,1473  |
| TcCLB.504741.50  | hypothetical protein, conserved                             | 0,1334 | 0,4738  |
| TcCLB.511911.98  | hypothetical protein, conserved                             | 0,1333 | 0,388   |
| TcCLB.508355.260 | 60S acidic ribosomal protein P0, putative (P0)              | 0,1332 | 0,04637 |
| TcCLB.506973.10  | trans-sialidase, Group V, putative                          | 0,1332 | 0,7291  |
| TcCLB.503827.20  | mucin-associated surface protein (MASP), putative           | 0,1332 | 0,7709  |
| TcCLB.507519.80  | eukaryotic peptide chain release factor subunit 1, putative | 0,133  | 0,4234  |
| TcCLB.506339.60  | trans-sialidase (pseudogene), putative                      | 0,133  | 0,71    |
| TcCLB.508693.180 | ankyrin, putative                                           | 0,1329 | 0,2367  |
| TcCLB.507867.50  | hypothetical protein, conserved                             | 0,1329 | 0,5307  |
| TcCLB.509549.110 | hypothetical protein, conserved (pseudogene)                | 0,1326 | 0,2884  |
| TcCLB.510087.50  | hypothetical protein, conserved                             | 0,1323 | 0,2919  |
| TcCLB.511107.41  | ATP-dependent Clp protease subunit heat shock protein 10    | 0,1323 | 0,5032  |
| TcCLB.509215.13  | hypothetical protein, conserved                             | 0,1322 | 0,71    |
| TcCLB.510483.130 | mucin TcMUCII, putative                                     | 0,1321 | 0,848   |
| TcCLB.504113.20  | MYH7B protein, putative                                     | 0,132  | 0,3941  |
| TcCLB.467795.19  | hypothetical protein, conserved                             | 0,1318 | 0,5209  |
| TcCLB.506221.40  | mitochondrial carrier protein, putative                     | 0,1316 | 0,415   |
| TcCLB.510181.140 | hypothetical protein, conserved                             | 0,1316 | 0,5276  |
| TcCLB.511391.220 | hypothetical protein, conserved                             | 0,1315 | 0,0648  |
| TcCLB.510721.10  | hypothetical protein, conserved                             | 0,1313 | 0,2135  |
| TcCLB.509525.270 | mucin TcMUCII, putative                                     | 0,1313 | 0,8841  |
| TcCLB.509123.30  | mitochondrial RNA binding protein 1                         | 0,1312 | 0,4551  |
| TcCLB.509719.56  | hypothetical protein, conserved                             | 0,131  | 0,2753  |
| TcCLB.506485.50  | hypothetical protein                                        | 0,131  | 0,4165  |
| TcCLB.509233.180 | ATP synthase F1, beta subunit, putative (ATPB)              | 0,1309 | 0,1547  |
| TcCLB.506529.150 | hypothetical protein, conserved                             | 0,1307 | 0,2453  |
| TcCLB.506919.10  | hypothetical protein                                        | 0,1307 | 0,7114  |
| TcCLB.511391.210 | mitochondrial calcium uptake 1, putative                    | 0,1306 | 0,2587  |
| TcCLB.506195.110 | malate dehydrogenase, putative                              | 0,1305 | 0,1012  |
| TcCLB.509171.10  | hypothetical protein, conserved                             | 0,1305 | 0,6125  |
| TcCLB.511075.24  | zinc-finger multi-pass transmembrane protein, putative      | 0,1304 | 0,4212  |
| TcCLB.508817.40  | hypothetical protein, conserved                             | 0,1301 | 0,3254  |
| TcCLB.510431.300 | trans-sialidase, Group II, putative                         | 0,1301 | 0,6447  |
| TcCLB.511683.10  | hypothetical protein                                        | 0,1298 | 0,6023  |
| TcCLB.506207.40  | hypothetical protein, conserved                             | 0,1297 | 0,2413  |
| TcCLB.503925.80  | CDP-diacylglycerol--inositol 3-phosphatidyltransferase      | 0,1296 | 0,5029  |
| TcCLB.510105.220 | transportin2-like protein, putative                         | 0,1295 | 0,2804  |
| TcCLB.509023.180 | kinesin, putative                                           | 0,1294 | 0,2226  |
| TcCLB.506967.65  | mucin TcMUCII (pseudogene), putative                        | 0,1294 | 0,8137  |
| TcCLB.508839.60  | ADP-ribosylation factor, putative                           | 0,1293 | 0,5199  |
| TcCLB.510181.80  | hypothetical protein, conserved                             | 0,1292 | 0,4097  |

|                  |                                                                |        |        |
|------------------|----------------------------------------------------------------|--------|--------|
| TcCLB.508153.840 | hypothetical protein, conserved                                | 0,129  | 0,3869 |
| TcCLB.504137.140 | hypothetical protein, conserved                                | 0,129  | 0,3986 |
| TcCLB.414243.10  | hypothetical protein, conserved                                | 0,129  | 0,5643 |
| TcCLB.509003.50  | hypothetical protein, conserved                                | 0,129  | 0,6165 |
| TcCLB.511487.170 | mucin-associated surface protein (MASP), putative              | 0,129  | 0,7105 |
| TcCLB.508221.840 | hypothetical protein                                           | 0,1289 | 0,8341 |
| TcCLB.503497.10  | mucin-associated surface protein (MASP, pseudogene), pu        | 0,1288 | 0,5974 |
| TcCLB.511279.10  | hypothetical protein, conserved                                | 0,1287 | 0,534  |
| TcCLB.510127.70  | leucine-rich repeat protein 1 (LRRP1), putative                | 0,1287 | 0,5713 |
| TcCLB.506811.100 | hypothetical protein, conserved                                | 0,1284 | 0,3878 |
| TcCLB.511837.80  | hypothetical protein, conserved                                | 0,1284 | 0,4086 |
| TcCLB.506617.50  | hypothetical protein                                           | 0,1284 | 0,4615 |
| TcCLB.506745.30  | hypothetical protein, conserved                                | 0,1283 | 0,808  |
| TcCLB.511655.50  | hypothetical protein, conserved (pseudogene)                   | 0,1282 | 0,367  |
| TcCLB.506177.70  | hypothetical protein                                           | 0,1279 | 0,5794 |
| TcCLB.510099.131 | hypothetical protein, conserved (fragment)                     | 0,1278 | 0,3236 |
| TcCLB.509657.30  | mucin-associated surface protein (MASP), putative              | 0,1278 | 0,7515 |
| TcCLB.506925.180 | protein kinase, putative                                       | 0,1275 | 0,2799 |
| TcCLB.506155.99  | hypothetical protein, conserved                                | 0,1275 | 0,4935 |
| TcCLB.506181.130 | hypothetical protein                                           | 0,1275 | 0,5135 |
| TcCLB.507801.50  | tubulin-tyrosine ligase, putative                              | 0,1273 | 0,4001 |
| TcCLB.511283.294 | b9 domain-containing protein 1 (b9d1)                          | 0,1272 | 0,283  |
| TcCLB.509127.110 | hypothetical protein, conserved                                | 0,1272 | 0,4171 |
| TcCLB.511301.40  | eukaryotic translation initiation factor 4E (eIF4E) interactir | 0,1272 | 0,4455 |
| TcCLB.508765.50  | mucin TcMUC1 (pseudogene), putative                            | 0,1272 | 0,668  |
| TcCLB.508905.20  | hypothetical protein, conserved (pseudogene)                   | 0,1272 | 0,6681 |
| TcCLB.509995.10  | 60S ribosomal protein L4, putative                             | 0,1271 | 0,1697 |
| TcCLB.506905.40  | ABC transporter, putative                                      | 0,1271 | 0,5607 |
| TcCLB.507711.60  | hypothetical protein, conserved                                | 0,127  | 0,3388 |
| TcCLB.506195.190 | intraflagellar transport protein 81, putative (IFT81)          | 0,1269 | 0,1902 |
| TcCLB.506321.310 | phosphoribosylpyrophosphate synthetase, putative               | 0,1269 | 0,1984 |
| TcCLB.506227.210 | hypothetical protein, conserved                                | 0,1268 | 0,4793 |
| TcCLB.425785.9   | hypothetical protein, conserved                                | 0,1266 | 0,5064 |
| TcCLB.511423.70  | glycerol-3-phosphate dehydrogenase (FAD-dependent), puti       | 0,1265 | 0,4571 |
| TcCLB.506859.130 | hypothetical protein, conserved                                | 0,1263 | 0,6408 |
| TcCLB.504755.10  | surface protease GP63, putative                                | 0,1263 | 0,9106 |
| TcCLB.508277.350 | cation transporter, putative                                   | 0,1262 | 0,1893 |
| TcCLB.503453.50  | hypothetical protein, conserved                                | 0,1261 | 0,4255 |
| TcCLB.509507.49  | mitotic cyclin, putative                                       | 0,126  | 0,5709 |
| TcCLB.507505.30  | hypothetical protein                                           | 0,1259 | 0,3923 |
| TcCLB.511131.60  | hypothetical protein, conserved                                | 0,1259 | 0,4396 |
| TcCLB.507275.30  | hypothetical protein, conserved                                | 0,1259 | 0,4592 |
| TcCLB.506363.80  | aminoacylase, putative                                         | 0,1259 | 0,8243 |
| TcCLB.507625.170 | hypothetical protein, conserved                                | 0,1258 | 0,3118 |
| TcCLB.508857.120 | hypothetical protein, conserved                                | 0,1258 | 0,4608 |

|                  |                                                           |        |        |
|------------------|-----------------------------------------------------------|--------|--------|
| TcCLB.508593.80  | hypothetical protein, conserved                           | 0,1257 | 0,3282 |
| TcCLB.508799.10  | hypothetical protein, conserved                           | 0,1257 | 0,4684 |
| TcCLB.508443.40  | hypothetical protein                                      | 0,1257 | 0,5255 |
| TcCLB.509999.120 | RNA-binding protein, putative                             | 0,1257 | 0,7226 |
| TcCLB.508333.9   | dispersed gene family protein 1 (DGF-1), putative (fragme | 0,1257 | 0,7711 |
| TcCLB.511145.40  | peroxin 14, putative                                      | 0,1256 | 0,3497 |
| TcCLB.507997.30  | trans-sialidase, Group V, putative                        | 0,1256 | 0,6458 |
| TcCLB.511803.40  | Present in the outer mitochondrial membrane proteome 9    | 0,1255 | 0,1152 |
| TcCLB.509233.239 | hypothetical protein, conserved                           | 0,1255 | 0,6331 |
| TcCLB.506979.40  | hypothetical protein, conserved                           | 0,1254 | 0,4396 |
| TcCLB.507841.14  | retrotransposon hot spot (RHS) protein, putative (fragmen | 0,1254 | 0,4496 |
| TcCLB.508081.40  | hypothetical protein                                      | 0,1254 | 0,8754 |
| TcCLB.510025.60  | hypothetical protein                                      | 0,1254 | 0,9068 |
| TcCLB.506999.120 | hypothetical protein, conserved                           | 0,1253 | 0,3754 |
| TcCLB.505993.10  | trans-sialidase (pseudogene), putative                    | 0,1252 | 0,7029 |
| TcCLB.509599.80  | hypothetical protein, conserved                           | 0,1251 | 0,3987 |
| TcCLB.507991.130 | hypothetical protein, conserved                           | 0,1249 | 0,5109 |
| TcCLB.506613.24  | mucin TcMUCII, putative                                   | 0,1249 | 0,8344 |
| TcCLB.511107.10  | hypothetical protein, conserved (pseudogene)              | 0,1248 | 0,4047 |
| TcCLB.506989.120 | hypothetical protein, conserved                           | 0,1248 | 0,4563 |
| TcCLB.507935.10  | mucin-like glycoprotein (pseudogene), putative            | 0,1248 | 0,8125 |
| TcCLB.506625.190 | hypothetical protein, conserved                           | 0,1247 | 0,5175 |
| TcCLB.503453.20  | hypothetical protein, conserved                           | 0,1246 | 0,2782 |
| TcCLB.504153.370 | hypothetical protein                                      | 0,1244 | 0,3251 |
| TcCLB.509243.40  | hypothetical protein, conserved (pseudogene)              | 0,1244 | 0,4705 |
| TcCLB.503721.10  | hypothetical protein, conserved                           | 0,124  | 0,4131 |
| TcCLB.507763.20  | hypothetical protein                                      | 0,124  | 0,619  |
| TcCLB.506849.20  | dynein heavy chain (pseudogene), putative                 | 0,1239 | 0,431  |
| TcCLB.503909.120 | cyclosome subunit, putative                               | 0,1239 | 0,5976 |
| TcCLB.510013.190 | hypothetical protein                                      | 0,1239 | 0,8438 |
| TcCLB.506309.30  | mucin-associated surface protein (MASP), putative         | 0,1239 | 0,8669 |
| TcCLB.503887.70  | phosphoglycerate mutase, putative (iPGAM)                 | 0,1235 | 0,5786 |
| TcCLB.507649.5   | hypothetical protein, conserved                           | 0,1235 | 0,7594 |
| TcCLB.503431.90  | hypothetical protein, conserved                           | 0,1233 | 0,4212 |
| TcCLB.510303.260 | hypothetical protein, conserved                           | 0,123  | 0,4685 |
| TcCLB.506847.50  | trans-sialidase (pseudogene), putative                    | 0,123  | 0,918  |
| TcCLB.510531.60  | hypothetical protein, conserved                           | 0,1229 | 0,299  |
| TcCLB.503539.20  | Putative intraflagellar transport protein A1 (PIFTA1)     | 0,1229 | 0,3534 |
| TcCLB.506757.50  | mucin-associated surface protein (MASP), putative         | 0,1229 | 0,7228 |
| TcCLB.506501.170 | mucin TcMUCII, putative                                   | 0,1229 | 0,8514 |
| TcCLB.508165.220 | mucin TcMUCII (pseudogene), putative                      | 0,1228 | 0,8252 |
| TcCLB.506309.100 | mucin-associated surface protein (MASP, pseudogene), pu   | 0,1228 | 0,8904 |
| TcCLB.509429.170 | hypothetical protein, conserved                           | 0,1227 | 0,4989 |
| TcCLB.507011.230 | hypothetical protein, conserved (pseudogene)              | 0,1226 | 0,3452 |
| TcCLB.510517.30  | hypothetical protein, conserved                           | 0,1226 | 0,3533 |



|                  |                                                           |        |        |
|------------------|-----------------------------------------------------------|--------|--------|
| TcCLB.504123.20  | hypothetical protein, conserved                           | 0,1226 | 0,4342 |
| TcCLB.503557.40  | Present in the outer mitochondrial membrane proteome 8    | 0,1226 | 0,5963 |
| TcCLB.506247.60  | hypothetical protein, conserved                           | 0,1225 | 0,3554 |
| TcCLB.507949.50  | SSU ribosomal protein, mitochondrial, putative (MRPS15)   | 0,1222 | 0,3983 |
| TcCLB.510667.4   | hypothetical protein, conserved (fragment)                | 0,1222 | 0,49   |
| TcCLB.506763.121 | elongation factor 1-gamma (EF-1-gamma, pseudogene), p     | 0,1221 | 0,8603 |
| TcCLB.503415.10  | hypothetical protein (pseudogene)                         | 0,122  | 0,4458 |
| TcCLB.509647.180 | nicotinate phosphoribosyltransferase, putative            | 0,1219 | 0,2479 |
| TcCLB.511233.20  | 60S ribosomal protein L34, putative                       | 0,1218 | 0,1958 |
| TcCLB.509023.60  | hypothetical protein, conserved                           | 0,1218 | 0,3853 |
| TcCLB.511057.40  | trans-sialidase, Group V, putative                        | 0,1218 | 0,6543 |
| TcCLB.511585.210 | hypothetical protein, conserved                           | 0,1216 | 0,496  |
| TcCLB.510647.50  | hypothetical protein, conserved                           | 0,1216 | 0,688  |
| TcCLB.506453.20  | mucin TcMUC (pseudogene), putative                        | 0,1215 | 0,6884 |
| TcCLB.509659.20  | dispersed gene family protein 1 (DGF-1, pseudogene), puta | 0,1215 | 0,7088 |
| TcCLB.506203.50  | DnaJ chaperone protein, putative                          | 0,1214 | 0,4451 |
| TcCLB.506425.120 | eRF1 methyltransferase catalytic subunit, putative        | 0,1214 | 0,5925 |
| TcCLB.508541.190 | cell cycle sequence binding phosphoprotein (RBP33), putat | 0,1213 | 0,2816 |
| TcCLB.510089.80  | protein kinase, putative                                  | 0,1213 | 0,406  |
| TcCLB.503617.40  | ATP synthase F1, alpha subunit, putative (fragment) (ATPF | 0,1212 | 0,2026 |
| TcCLB.509213.140 | mitochondrial RNA binding complex 1 subunit, putative     | 0,1212 | 0,2592 |
| TcCLB.508211.30  | sphingosine kinase A, B, putative                         | 0,1212 | 0,3736 |
| TcCLB.508269.10  | hypothetical protein, conserved                           | 0,1212 | 0,4127 |
| TcCLB.506931.64  | RNA processing endonuclease 1, putative                   | 0,1212 | 0,4853 |
| TcCLB.504039.50  | retrotransposon hot spot protein (RHS, pseudogene), putat | 0,1211 | 0,6953 |
| TcCLB.504149.201 | ATP-dependent DEAD/H RNA helicase (pseudogene), putat     | 0,1211 | 0,7038 |
| TcCLB.505009.4   | hypothetical protein, conserved                           | 0,1211 | 0,7653 |
| TcCLB.445869.10  | hypothetical protein, conserved                           | 0,121  | 0,4277 |
| TcCLB.507881.110 | trans-sialidase (pseudogene), putative                    | 0,121  | 0,4976 |
| TcCLB.509671.20  | hypothetical protein, conserved                           | 0,1208 | 0,3788 |
| TcCLB.509693.100 | 2-aminoethylphosphonate:pyruvateaminotransferase- like    | 0,1208 | 0,5135 |
| TcCLB.511895.40  | hypothetical protein                                      | 0,1208 | 0,5444 |
| TcCLB.510717.30  | 2-oxoglutarate dehydrogenase E1 component, putative       | 0,1207 | 0,191  |
| TcCLB.509699.110 | mucin-associated surface protein (MASP), putative         | 0,1206 | 0,7665 |
| TcCLB.510173.30  | hypothetical protein, conserved                           | 0,1205 | 0,5848 |
| TcCLB.507237.160 | mucin TcMUCII, putative                                   | 0,1205 | 0,882  |
| TcCLB.509027.10  | DNA photolyase, putative                                  | 0,1204 | 0,5209 |
| TcCLB.509647.50  | hypothetical protein, conserved                           | 0,1203 | 0,2003 |
| TcCLB.510743.120 | hypothetical protein, conserved                           | 0,1203 | 0,3665 |
| TcCLB.507923.40  | hypothetical protein, conserved                           | 0,1201 | 0,4974 |
| TcCLB.507711.260 | hypothetical protein, conserved                           | 0,12   | 0,3409 |
| TcCLB.506705.60  | hypothetical protein, conserved                           | 0,12   | 0,3499 |
| TcCLB.508523.21  | trans-sialidase (pseudogene), putative                    | 0,12   | 0,634  |
| TcCLB.504625.99  | protein tyrosine phosphatase, putative (fragment)         | 0,12   | 0,6445 |
| TcCLB.506893.40  | hypothetical protein, conserved                           | 0,12   | 0,6847 |

|                  |                                                            |        |        |
|------------------|------------------------------------------------------------|--------|--------|
| TcCLB.511229.30  | hypothetical protein, conserved                            | 0,1199 | 0,4218 |
| TcCLB.510575.210 | hypothetical protein, conserved                            | 0,1199 | 0,4349 |
| TcCLB.510063.20  | ATP-dependent DEAD/H DNA helicase recQ, putative           | 0,1199 | 0,7074 |
| TcCLB.507821.20  | hypothetical protein                                       | 0,1199 | 0,7972 |
| TcCLB.508741.240 | hypothetical protein, conserved                            | 0,1195 | 0,3451 |
| TcCLB.505071.30  | serine/threonine protein kinase, putative                  | 0,1195 | 0,4269 |
| TcCLB.509195.70  | mucin-associated surface protein (MASP), putative          | 0,1195 | 0,6944 |
| TcCLB.506679.40  | mitogen-activated protein kinase kinase 5, putative (MKK5) | 0,1193 | 0,3478 |
| TcCLB.511239.70  | hypothetical protein, conserved                            | 0,1192 | 0,3956 |
| TcCLB.506879.100 | hypothetical protein, conserved                            | 0,1191 | 0,6589 |
| TcCLB.511245.60  | hypothetical protein, conserved                            | 0,1186 | 0,7454 |
| TcCLB.511185.120 | mucin-associated surface protein (MASP), putative          | 0,1186 | 0,791  |
| TcCLB.511881.14  | RNA polymerase subunit RPB10, putative (RPB10)             | 0,1185 | 0,569  |
| TcCLB.510355.41  | mucin-associated surface protein (MASP, pseudogene), pu    | 0,1185 | 0,8065 |
| TcCLB.508479.90  | hypothetical protein, conserved (pseudogene)               | 0,1184 | 0,4571 |
| TcCLB.504147.110 | asparaginase, putative                                     | 0,1184 | 0,6156 |
| TcCLB.511469.105 | hypothetical protein                                       | 0,1184 | 0,6322 |
| TcCLB.468217.14  | mucin-associated surface protein (MASP), putative          | 0,1184 | 0,7173 |
| TcCLB.510465.100 | trans-sialidase, Group V, putative                         | 0,1184 | 0,8107 |
| TcCLB.507957.310 | hypothetical protein                                       | 0,1184 | 0,8182 |
| TcCLB.430605.20  | PTP1-interacting protein, 39 kDa, putative                 | 0,1183 | 0,2759 |
| TcCLB.510723.10  | hypothetical protein, conserved                            | 0,1182 | 0,7054 |
| TcCLB.506201.90  | hypothetical protein, conserved                            | 0,1181 | 0,4551 |
| TcCLB.510371.90  | trans-sialidase, Group V, putative                         | 0,118  | 0,6184 |
| TcCLB.509695.10  | aspartyl-tRNA synthetase, putative                         | 0,1178 | 0,4257 |
| TcCLB.509063.10  | hypothetical protein, conserved                            | 0,1178 | 0,5515 |
| TcCLB.508347.80  | Present in the outer mitochondrial membrane proteome 2     | 0,1177 | 0,2695 |
| TcCLB.503909.40  | hypothetical protein                                       | 0,1176 | 0,6749 |
| TcCLB.510311.140 | arginine N-methyltransferase, putative                     | 0,1175 | 0,3519 |
| TcCLB.504009.40  | Axonemal inner arm dynein light chain, putative            | 0,1175 | 0,4818 |
| TcCLB.510275.110 | trans-sialidase (pseudogene), putative                     | 0,1175 | 0,7306 |
| TcCLB.506223.50  | hypothetical protein, conserved                            | 0,1174 | 0,4665 |
| TcCLB.503917.21  | hypothetical protein, conserved                            | 0,1174 | 0,5088 |
| TcCLB.504085.40  | hypothetical protein, conserved                            | 0,1173 | 0,4688 |
| TcCLB.509695.180 | 40S ribosomal protein S23, putative                        | 0,1172 | 0,1876 |
| TcCLB.507639.90  | hypothetical protein, conserved                            | 0,1171 | 0,658  |
| TcCLB.504081.460 | mucin-associated surface protein (MASP), putative          | 0,1171 | 0,7527 |
| TcCLB.510359.50  | hypothetical protein, conserved                            | 0,117  | 0,6913 |
| TcCLB.432027.9   | hypothetical protein, conserved                            | 0,1169 | 0,596  |
| TcCLB.507979.30  | trans-sialidase, Group I, putative                         | 0,1168 | 0,6578 |
| TcCLB.511727.199 | CYC2-like cyclin 6, putative (CYC6)                        | 0,1167 | 0,4815 |
| TcCLB.510375.20  | trans-sialidase (pseudogene), putative                     | 0,1167 | 0,854  |
| TcCLB.429251.10  | mucin-associated surface protein (MASP), putative          | 0,1167 | 0,9242 |
| TcCLB.509543.30  | hypothetical protein                                       | 0,1166 | 0,5142 |
| TcCLB.508735.65  | trans-sialidase (pseudogene), putative                     | 0,1165 | 0,6014 |

|                  |                                                           |        |        |
|------------------|-----------------------------------------------------------|--------|--------|
| TcCLB.508207.60  | hypothetical protein, conserved                           | 0,1164 | 0,521  |
| TcCLB.507065.70  | mucin TcMUCII, putative                                   | 0,1162 | 0,8761 |
| TcCLB.507001.34  | hypothetical protein, conserved                           | 0,1161 | 0,4803 |
| TcCLB.506281.100 | mucin-associated surface protein (MASP, pseudogene), pu   | 0,116  | 0,7886 |
| TcCLB.503687.49  | hypothetical protein, conserved                           | 0,1159 | 0,4956 |
| TcCLB.511621.50  | RNA-binding protein, putative                             | 0,1158 | 0,2352 |
| TcCLB.508849.20  | retrotransposon hot spot protein (RHS, pseudogene), putat | 0,1158 | 0,4455 |
| TcCLB.506855.10  | palmitoyl acyltransferase 3, putative                     | 0,1158 | 0,5089 |
| TcCLB.507093.40  | hypothetical protein, conserved                           | 0,1157 | 0,2368 |
| TcCLB.507517.70  | hypothetical protein, conserved                           | 0,1157 | 0,4811 |
| TcCLB.510283.40  | phosphoglycerate mutase family member 5, putative         | 0,1156 | 0,6251 |
| TcCLB.511211.10  | hypothetical protein, conserved                           | 0,1155 | 0,5052 |
| TcCLB.510525.60  | hypothetical protein, conserved                           | 0,1155 | 0,5278 |
| TcCLB.508689.50  | GPI transamidase subunit 16, putative (fragment) (GPI16)  | 0,1155 | 0,6321 |
| TcCLB.504033.190 | EF hand, putative                                         | 0,1153 | 0,4505 |
| TcCLB.509599.180 | hypothetical protein, conserved                           | 0,1153 | 0,5097 |
| TcCLB.510697.70  | elongation factor 1-gamma (EF-1-gamma, pseudogene), p     | 0,1153 | 0,5378 |
| TcCLB.510359.380 | mucin-associated surface protein (MASP), putative         | 0,1152 | 0,8206 |
| TcCLB.509693.200 | hypothetical protein, conserved                           | 0,1151 | 0,5323 |
| TcCLB.511127.360 | hypothetical protein, conserved                           | 0,1149 | 0,5189 |
| TcCLB.506003.10  | retrotransposon hot spot protein (RHS, pseudogene), putat | 0,1146 | 0,7616 |
| TcCLB.509055.10  | RNA-binding protein, putative                             | 0,1145 | 0,5365 |
| TcCLB.507093.300 | hypothetical protein SCD6.10                              | 0,1144 | 0,3203 |
| TcCLB.509717.70  | transportin2-like protein, putative                       | 0,1143 | 0,3214 |
| TcCLB.511149.4   | mucin-associated surface protein (MASP, pseudogene), pu   | 0,1143 | 0,8483 |
| TcCLB.510055.140 | hypothetical protein, conserved                           | 0,1142 | 0,5228 |
| TcCLB.510515.110 | hypothetical protein, conserved                           | 0,114  | 0,3942 |
| TcCLB.506303.160 | hypothetical protein                                      | 0,114  | 0,4266 |
| TcCLB.507951.70  | hypothetical protein                                      | 0,114  | 0,5957 |
| TcCLB.511383.10  | hypothetical protein, conserved                           | 0,114  | 0,6809 |
| TcCLB.506727.120 | hypothetical protein, conserved                           | 0,1139 | 0,285  |
| TcCLB.507957.179 | mucin-associated surface protein (MASP), putative         | 0,1138 | 0,8431 |
| TcCLB.504029.50  | hypothetical protein, conserved                           | 0,1135 | 0,482  |
| TcCLB.508005.20  | trans-sialidase (pseudogene), putative                    | 0,1134 | 0,8601 |
| TcCLB.511389.80  | protein kinase, putative                                  | 0,1131 | 0,3971 |
| TcCLB.509695.140 | hypothetical protein, conserved                           | 0,113  | 0,4438 |
| TcCLB.510437.20  | 60S ribosomal protein L14, putative                       | 0,1129 | 0,2219 |
| TcCLB.510403.89  | synaptojanin (N-terminal domain), putative                | 0,1129 | 0,5071 |
| TcCLB.508479.270 | hypothetical protein, conserved                           | 0,1128 | 0,2925 |
| TcCLB.507925.10  | hypothetical protein, conserved (pseudogene)              | 0,1128 | 0,7787 |
| TcCLB.511745.20  | AAA ATPase, putative                                      | 0,1127 | 0,3382 |
| TcCLB.510149.9   | hypothetical protein, conserved (fragment)                | 0,1126 | 0,5452 |
| TcCLB.508641.190 | hypothetical protein, conserved                           | 0,1126 | 0,596  |
| TcCLB.508707.300 | hypothetical protein, conserved                           | 0,1125 | 0,2711 |
| TcCLB.511145.30  | hypothetical protein, conserved                           | 0,1125 | 0,4106 |

|                  |                                                                 |        |        |
|------------------|-----------------------------------------------------------------|--------|--------|
| TcCLB.511109.30  | dynein intermediate chain, putative                             | 0,1125 | 0,4506 |
| TcCLB.510749.30  | Sorting nexin-4 (ATG24)                                         | 0,1124 | 0,3165 |
| TcCLB.508355.104 | hypothetical protein, conserved                                 | 0,1124 | 0,6756 |
| TcCLB.510767.10  | ribosomal protein L15, putative                                 | 0,1123 | 0,203  |
| TcCLB.509669.80  | hypothetical protein, conserved                                 | 0,1122 | 0,6838 |
| TcCLB.508165.120 | mucin-associated surface protein (MASP), putative               | 0,1122 | 0,7659 |
| TcCLB.503823.70  | hypothetical protein, conserved                                 | 0,1121 | 0,6919 |
| TcCLB.506435.280 | hypothetical protein, conserved                                 | 0,112  | 0,4194 |
| TcCLB.508411.20  | hypothetical protein, conserved                                 | 0,112  | 0,5267 |
| TcCLB.508257.170 | dynein heavy chain, putative                                    | 0,1119 | 0,3776 |
| TcCLB.507957.220 | mucin-associated surface protein (MASP), putative               | 0,1119 | 0,7599 |
| TcCLB.510901.260 | tRNA pseudouridine synthase (pseudogene), putative              | 0,1118 | 0,5339 |
| TcCLB.506861.30  | 60S ribosomal protein L14, putative                             | 0,1117 | 0,2281 |
| TcCLB.506717.25  | trans-sialidase (pseudogene), putative                          | 0,1117 | 0,6575 |
| TcCLB.503439.14  | dispersed gene family protein 1 (DGF-1, pseudogene), putative   | 0,1116 | 0,6573 |
| TcCLB.508873.370 | hypothetical protein                                            | 0,1116 | 0,7932 |
| TcCLB.508261.120 | hypothetical protein                                            | 0,1115 | 0,8073 |
| TcCLB.506227.40  | hypothetical protein, conserved                                 | 0,1114 | 0,4725 |
| TcCLB.511515.9   | E3 ubiquitin-protein ligase, putative (fragment)                | 0,1113 | 0,5453 |
| TcCLB.506559.470 | ribosomal protein l35a, putative                                | 0,1112 | 0,1469 |
| TcCLB.510631.20  | trans-sialidase (pseudogene), putative                          | 0,1111 | 0,5185 |
| TcCLB.511039.6   | hypothetical protein, conserved                                 | 0,1111 | 0,5435 |
| TcCLB.505965.60  | hypothetical protein, conserved                                 | 0,1111 | 0,5791 |
| TcCLB.452699.30  | dispersed gene family protein 1 (DGF-1), putative               | 0,1111 | 0,837  |
| TcCLB.506679.94  | 40S ribosomal protein S18, putative                             | 0,111  | 0,2082 |
| TcCLB.509979.90  | 60S ribosomal protein L35, putative                             | 0,111  | 0,2757 |
| TcCLB.508977.120 | trans-sialidase, Group V, putative                              | 0,111  | 0,6067 |
| TcCLB.511455.10  | surface protease GP63 (pseudogene), putative                    | 0,111  | 0,6946 |
| TcCLB.507573.3   | N-acetyltransferase complex ARD1 subunit (pseudogene), putative | 0,1109 | 0,732  |
| TcCLB.511293.50  | kinesin, putative                                               | 0,1107 | 0,4283 |
| TcCLB.509029.100 | hypothetical protein, conserved                                 | 0,1107 | 0,5095 |
| TcCLB.508469.10  | hypothetical protein, conserved                                 | 0,1107 | 0,7079 |
| TcCLB.506689.10  | trans-sialidase (pseudogene), putative                          | 0,1107 | 0,7738 |
| TcCLB.508205.20  | nucleolar RNA helicase II, putative                             | 0,1106 | 0,3665 |
| TcCLB.510823.100 | hypothetical protein, conserved                                 | 0,1106 | 0,4283 |
| TcCLB.506241.10  | retrotransposon hot spot protein (RHS, pseudogene), putative    | 0,1105 | 0,7114 |
| TcCLB.511545.140 | hypothetical protein, conserved                                 | 0,1104 | 0,415  |
| TcCLB.510579.14  | hypothetical protein, conserved                                 | 0,1103 | 0,4055 |
| TcCLB.508461.70  | hypothetical protein                                            | 0,1103 | 0,6769 |
| TcCLB.508267.10  | hypothetical protein, conserved                                 | 0,1102 | 0,3508 |
| TcCLB.506729.70  | hypothetical protein, conserved                                 | 0,1102 | 0,4575 |
| TcCLB.511171.60  | surface protease GP63 (pseudogene), putative                    | 0,1101 | 0,8705 |
| TcCLB.503677.10  | phosphomannose isomerase, putative                              | 0,11   | 0,4109 |
| TcCLB.511737.9   | hypothetical protein, conserved                                 | 0,11   | 0,7282 |
| TcCLB.506635.80  | Hydroxymethylglutaryl-CoA lyase, mitochondrial, putative        | 0,1099 | 0,4065 |

|                  |                                                           |        |        |
|------------------|-----------------------------------------------------------|--------|--------|
| TcCLB.506961.160 | retrotransposon hot spot (RHS) protein, putative          | 0,1098 | 0,4379 |
| TcCLB.509997.73  | hypothetical protein, conserved                           | 0,1098 | 0,5137 |
| TcCLB.509065.180 | protein kinase-like protein, putative                     | 0,1097 | 0,3528 |
| TcCLB.511197.40  | trans-sialidase (pseudogene), putative                    | 0,1097 | 0,7112 |
| TcCLB.503449.14  | hypothetical protein, conserved                           | 0,1096 | 0,5081 |
| TcCLB.510257.100 | mitochondrial RNA binding complex 1 subunit, putative     | 0,1095 | 0,3089 |
| TcCLB.510359.360 | hypothetical protein, conserved                           | 0,1095 | 0,4832 |
| TcCLB.507027.50  | Present in the outer mitochondrial membrane proteome 3:   | 0,1095 | 0,5189 |
| TcCLB.506559.314 | hypothetical protein, conserved                           | 0,1095 | 0,6125 |
| TcCLB.506289.230 | mucin-associated surface protein (MASP, pseudogene), pu   | 0,1095 | 0,7281 |
| TcCLB.508265.4   | synaptojanin (N-terminal domain), putative (fragment)     | 0,1094 | 0,6443 |
| TcCLB.511527.34  | 60S ribosomal protein L8, putative                        | 0,1093 | 0,1813 |
| TcCLB.505037.140 | retrotransposon hot spot protein (RHS, pseudogene), putat | 0,1093 | 0,5782 |
| TcCLB.511589.220 | hypothetical protein, conserved                           | 0,1093 | 0,6005 |
| TcCLB.511421.120 | E3 ubiquitin-protein ligase KCMF1, putative               | 0,1091 | 0,3759 |
| TcCLB.511529.220 | hypothetical protein, conserved                           | 0,1091 | 0,6715 |
| TcCLB.511621.220 | esterase, putative                                        | 0,109  | 0,703  |
| TcCLB.508795.19  | protein kinase, putative (fragment)                       | 0,1089 | 0,4382 |
| TcCLB.503455.10  | chaperone DNAJ protein, putative                          | 0,1089 | 0,5387 |
| TcCLB.504557.50  | dispersed gene family protein 1 (DGF-1), putative         | 0,1089 | 0,7888 |
| TcCLB.508313.130 | mucin TcMUCII, putative                                   | 0,1089 | 0,8469 |
| TcCLB.503925.119 | protein kinase, putative                                  | 0,1087 | 0,5892 |
| TcCLB.508283.40  | trans-sialidase (pseudogene), putative                    | 0,1087 | 0,6465 |
| TcCLB.441061.9   | dynein heavy chain, putative (fragment)                   | 0,1084 | 0,5417 |
| TcCLB.506123.30  | protein kinase, putative                                  | 0,1083 | 0,3422 |
| TcCLB.509763.10  | trans-sialidase, putative                                 | 0,1083 | 0,8383 |
| TcCLB.509649.20  | hypothetical protein                                      | 0,1082 | 0,4435 |
| TcCLB.509825.14  | 40S ribosomal protein SA, putative                        | 0,1082 | 0,5896 |
| TcCLB.506543.50  | hypothetical protein, conserved                           | 0,1082 | 0,8086 |
| TcCLB.509979.95  | 60S ribosomal protein L35, putative                       | 0,1081 | 0,2751 |
| TcCLB.507081.50  | hypothetical protein, conserved                           | 0,1078 | 0,4306 |
| TcCLB.503885.70  | hypothetical protein, conserved                           | 0,1078 | 0,6427 |
| TcCLB.511871.150 | trans-sialidase (pseudogene), putative                    | 0,1078 | 0,7036 |
| TcCLB.511145.20  | 60S ribosomal protein L32, putative                       | 0,1077 | 0,2878 |
| TcCLB.510275.283 | mucin TcMUCII (pseudogene), putative                      | 0,1077 | 0,8628 |
| TcCLB.509167.20  | 3-hydroxy-3-methylglutaryl-CoA reductase, putative        | 0,1076 | 0,3231 |
| TcCLB.511621.160 | hypothetical protein, conserved                           | 0,1076 | 0,5114 |
| TcCLB.511239.20  | hypothetical protein, conserved                           | 0,1076 | 0,5202 |
| TcCLB.511449.10  | mucin-associated surface protein (MASP), putative         | 0,1075 | 0,859  |
| TcCLB.511289.40  | hypothetical protein, conserved                           | 0,1074 | 0,3001 |
| TcCLB.508479.360 | hypothetical protein, conserved                           | 0,1074 | 0,4189 |
| TcCLB.506359.99  | hypothetical protein                                      | 0,1074 | 0,6485 |
| TcCLB.508251.40  | mucin TcMUCII, putative                                   | 0,1072 | 0,8782 |
| TcCLB.503679.30  | hypothetical protein, conserved                           | 0,1071 | 0,5593 |
| TcCLB.506393.120 | hypothetical protein, conserved (pseudogene)              | 0,107  | 0,4954 |

|                  |                                                            |        |        |
|------------------|------------------------------------------------------------|--------|--------|
| TcCLB.507711.170 | hypothetical protein, conserved                            | 0,107  | 0,5242 |
| TcCLB.509027.24  | hypothetical protein, conserved                            | 0,107  | 0,5766 |
| TcCLB.506759.220 | mucin-associated surface protein (MASP), putative          | 0,107  | 0,8564 |
| TcCLB.510237.40  | mucin-associated surface protein (MASP, pseudogene), pu    | 0,1069 | 0,7653 |
| TcCLB.508409.60  | hypothetical protein, conserved                            | 0,1068 | 0,4254 |
| TcCLB.510805.30  | mucin-associated surface protein (MASP, pseudogene), pu    | 0,1067 | 0,7562 |
| TcCLB.511185.80  | trans-sialidase, Group V, putative                         | 0,1067 | 0,7888 |
| TcCLB.508209.159 | hypothetical protein, conserved                            | 0,1066 | 0,552  |
| TcCLB.511253.10  | kinesin-like protein, putative                             | 0,1065 | 0,6453 |
| TcCLB.511861.80  | UDP-Gal or UDP-GlcNAc-dependent glycosyltransferase, pu    | 0,1064 | 0,5766 |
| TcCLB.507949.10  | chaperone DNAJ protein, putative                           | 0,1064 | 0,627  |
| TcCLB.511123.20  | retrotransposon hot spot protein (RHS, pseudogene), putat  | 0,1064 | 0,6365 |
| TcCLB.507729.50  | mucin-associated surface protein (MASP), putative (fragm   | 0,1064 | 0,7815 |
| TcCLB.510759.110 | hypothetical protein, conserved                            | 0,1063 | 0,4118 |
| TcCLB.511255.341 | trans-sialidase (pseudogene), putative                     | 0,1063 | 0,8075 |
| TcCLB.511421.180 | hypothetical protein, conserved                            | 0,1061 | 0,5639 |
| TcCLB.509047.110 | rac serine-threonine kinase, putative                      | 0,106  | 0,4001 |
| TcCLB.508389.100 | mucin-associated surface protein (MASP), putative          | 0,106  | 0,7486 |
| TcCLB.506499.140 | mucin-associated surface protein (MASP), putative          | 0,1059 | 0,7901 |
| TcCLB.506885.270 | tubulin tyrosine ligase, putative                          | 0,1057 | 0,4142 |
| TcCLB.511309.70  | hypothetical protein, conserved                            | 0,1056 | 0,4475 |
| TcCLB.508153.570 | protein kinase, putative                                   | 0,1056 | 0,5599 |
| TcCLB.506755.74  | mitochondrial carrier protein, putative                    | 0,1055 | 0,5276 |
| TcCLB.511865.70  | hypothetical protein, conserved                            | 0,1055 | 0,5515 |
| TcCLB.506575.9   | hypothetical protein, conserved                            | 0,1053 | 0,3671 |
| TcCLB.511277.290 | aconitase, putative                                        | 0,1053 | 0,4    |
| TcCLB.510575.140 | hypothetical protein, conserved                            | 0,1053 | 0,5364 |
| TcCLB.509115.20  | trans-sialidase, Group V, putative                         | 0,1053 | 0,7118 |
| TcCLB.503629.10  | hypothetical protein, conserved                            | 0,1051 | 0,4382 |
| TcCLB.509991.100 | Transcription elongation factor 1 domain-containing protei | 0,1051 | 0,5621 |
| TcCLB.509053.179 | RNA-binding protein, putative (fragment)                   | 0,105  | 0,5505 |
| TcCLB.510885.50  | hypothetical protein, conserved                            | 0,105  | 0,6481 |
| TcCLB.509051.40  | adenosine kinase, putative                                 | 0,1048 | 0,3339 |
| TcCLB.508543.140 | electron transfer flavoprotein-ubiquinone oxidoreductase,  | 0,1048 | 0,7253 |
| TcCLB.503527.10  | hypothetical protein, conserved                            | 0,1046 | 0,2374 |
| TcCLB.510311.40  | hypothetical protein, conserved                            | 0,1046 | 0,2882 |
| TcCLB.509429.180 | hypothetical protein, conserved                            | 0,1046 | 0,4404 |
| TcCLB.508911.70  | hypothetical protein                                       | 0,1045 | 0,4946 |
| TcCLB.507821.140 | trans-sialidase (pseudogene), putative                     | 0,1045 | 0,7639 |
| TcCLB.508209.30  | hypothetical protein, conserved                            | 0,1044 | 0,3516 |
| TcCLB.503855.80  | hypothetical protein, conserved                            | 0,1044 | 0,4785 |
| TcCLB.510753.9   | helicase, putative                                         | 0,1043 | 0,3466 |
| TcCLB.507597.10  | hypothetical protein                                       | 0,1041 | 0,802  |
| TcCLB.505071.80  | hypothetical protein                                       | 0,1039 | 0,4266 |
| TcCLB.506331.174 | dispersed gene family protein 1 (DGF-1, pseudogene), puta  | 0,1039 | 0,6908 |

|                  |                                                           |         |        |
|------------------|-----------------------------------------------------------|---------|--------|
| TcCLB.507041.90  | hypothetical protein                                      | 0,1038  | 0,6734 |
| TcCLB.508153.900 | hypothetical protein, conserved                           | 0,1037  | 0,3954 |
| TcCLB.509471.50  | hypothetical protein, conserved                           | 0,1037  | 0,4652 |
| TcCLB.508461.4   | hypothetical protein, conserved                           | 0,1035  | 0,4658 |
| TcCLB.510187.250 | hypothetical protein, conserved                           | 0,1035  | 0,5877 |
| TcCLB.511587.10  | hypothetical protein                                      | 0,1035  | 0,8343 |
| TcCLB.510497.100 | mucin-associated surface protein (MASP), putative         | 0,1033  | 0,8182 |
| TcCLB.510311.170 | hypothetical protein, conserved                           | 0,1032  | 0,5186 |
| TcCLB.506297.250 | palmitoyl acyltransferase 7, putative                     | 0,1031  | 0,415  |
| TcCLB.511633.50  | hypothetical protein, conserved                           | 0,1031  | 0,4298 |
| TcCLB.505843.20  | 60S ribosomal protein L6, putative                        | 0,1028  | 0,2737 |
| TcCLB.507447.10  | hypothetical protein, conserved                           | 0,1027  | 0,5917 |
| TcCLB.511071.45  | tuzin-like (pseudogene), putative                         | 0,1026  | 0,4451 |
| TcCLB.509671.60  | hypothetical protein                                      | 0,1024  | 0,6445 |
| TcCLB.403875.19  | hypothetical protein, conserved (fragment)                | 0,1022  | 0,7961 |
| TcCLB.511831.10  | trans-sialidase, putative (fragment)                      | 0,1021  | 0,691  |
| TcCLB.509115.30  | mucin-associated surface protein (MASP), putative         | 0,1019  | 0,7425 |
| TcCLB.508919.180 | trans-sialidase (pseudogene), putative                    | 0,1018  | 0,3768 |
| TcCLB.509433.10  | hypothetical protein                                      | 0,1018  | 0,8238 |
| TcCLB.509433.30  | hypothetical protein                                      | 0,1017  | 0,7274 |
| TcCLB.511491.110 | rab6 GTPase activating protein, putative                  | 0,1014  | 0,5997 |
| TcCLB.511325.10  | amino acid permease (pseudogene), putative                | 0,1014  | 0,8373 |
| TcCLB.506405.120 | V-type ATPase, A subunit, putative                        | 0,1011  | 0,2232 |
| TcCLB.510025.7   | syntaxin binding protein (pseudogene), putative           | 0,1011  | 0,8619 |
| TcCLB.485683.10  | RNA-binding protein 42 (RNA-binding motif protein 42), pu | 0,101   | 0,3609 |
| TcCLB.508387.80  | hypothetical protein, conserved                           | 0,101   | 0,4746 |
| TcCLB.506635.104 | hypothetical protein                                      | 0,101   | 0,6885 |
| TcCLB.506247.270 | ATPase, putative                                          | 0,1007  | 0,3841 |
| TcCLB.506679.190 | hypothetical protein, conserved                           | 0,1007  | 0,4048 |
| TcCLB.508347.30  | hypothetical protein, conserved                           | 0,1007  | 0,4267 |
| TcCLB.510719.150 | hypothetical protein, conserved                           | 0,1005  | 0,3043 |
| TcCLB.510609.30  | GTPase, putative                                          | 0,1003  | 0,487  |
| TcCLB.508207.54  | hypothetical protein, conserved                           | 0,1003  | 0,6453 |
| TcCLB.509805.220 | cholinephosphate cytidyltransferase A, putative           | 0,1002  | 0,3535 |
| TcCLB.504115.30  | beta galactofuranosyl glycosyltransferase, putative       | 0,1002  | 0,5704 |
| TcCLB.508837.140 | U1 small nuclear ribonucleoprotein, putative              | 0,1002  | 0,6185 |
| TcCLB.510007.20  | hypothetical protein, conserved                           | 0,1001  | 0,5396 |
| TcCLB.509665.20  | mucin-associated surface protein (MASP), putative         | 0,1     | 0,788  |
| TcCLB.508823.90  | hypothetical protein                                      | 0,09982 | 0,5407 |
| TcCLB.508465.149 | hypothetical protein, conserved (fragment)                | 0,0998  | 0,6336 |
| TcCLB.506559.559 | antigenic protein, putative                               | 0,09949 | 0,342  |
| TcCLB.507993.5   | GPI-anchor transamidase subunit 8 (GPI8, pseudogene), pu  | 0,09949 | 0,7654 |
| TcCLB.503775.41  | hypothetical protein, conserved (pseudogene)              | 0,09946 | 0,8406 |
| TcCLB.509353.30  | 40S ribosomal protein S3, putative                        | 0,09944 | 0,2594 |
| TcCLB.506321.280 | hypothetical protein, conserved                           | 0,09942 | 0,2175 |

|                  |                                                          |         |        |
|------------------|----------------------------------------------------------|---------|--------|
| TcCLB.510149.30  | hypothetical protein, conserved                          | 0,09932 | 0,4081 |
| TcCLB.511467.16  | hypothetical protein, conserved                          | 0,0993  | 0,5189 |
| TcCLB.507053.50  | hypothetical protein, conserved                          | 0,09925 | 0,4488 |
| TcCLB.511807.256 | hypothetical protein, conserved                          | 0,09919 | 0,5626 |
| TcCLB.510527.9   | kinesin, putative                                        | 0,09914 | 0,5924 |
| TcCLB.508597.9   | retrotransposon hot spot (RHS) protein, putative         | 0,09908 | 0,6504 |
| TcCLB.509033.60  | hypothetical protein, conserved                          | 0,09907 | 0,5232 |
| TcCLB.503449.10  | 60S ribosomal protein L17, putative                      | 0,09906 | 0,2453 |
| TcCLB.403869.10  | trans-sialidase, putative (fragment)                     | 0,09905 | 0,7835 |
| TcCLB.511423.130 | hypothetical protein, conserved (pseudogene)             | 0,09901 | 0,5888 |
| TcCLB.510421.150 | protein kinase, putative                                 | 0,09892 | 0,3251 |
| TcCLB.508059.10  | hypothetical protein, conserved                          | 0,09889 | 0,6764 |
| TcCLB.510933.140 | trans-sialidase (pseudogene), putative                   | 0,09889 | 0,8539 |
| TcCLB.507991.50  | kinesin, putative                                        | 0,09887 | 0,3382 |
| TcCLB.506955.226 | elongation factor 1-gamma (EF-1-gamma, pseudogene), p    | 0,09884 | 0,8973 |
| TcCLB.506755.150 | hypothetical protein, conserved                          | 0,09877 | 0,5985 |
| TcCLB.509695.230 | serine carboxypeptidase (CBP1), putative (fragment)      | 0,09874 | 0,5637 |
| TcCLB.506247.90  | hypothetical protein                                     | 0,09859 | 0,5721 |
| TcCLB.507715.100 | hypothetical protein, conserved                          | 0,09851 | 0,4932 |
| TcCLB.511627.150 | beta-ketoacyl-ACP reductase                              | 0,09848 | 0,5683 |
| TcCLB.510545.60  | hypothetical protein, conserved (pseudogene)             | 0,09843 | 0,8729 |
| TcCLB.506409.90  | mucin-associated surface protein (MASP), putative        | 0,0984  | 0,8984 |
| TcCLB.508207.230 | 6-phosphofructo-2-kinase/fructose-2,6-biphosphatase, put | 0,09839 | 0,4706 |
| TcCLB.510579.90  | hypothetical protein, conserved                          | 0,09838 | 0,5033 |
| TcCLB.506529.100 | hypothetical protein, conserved                          | 0,09836 | 0,4688 |
| TcCLB.506925.360 | hypothetical protein                                     | 0,09818 | 0,5355 |
| TcCLB.510145.50  | hypothetical protein, conserved                          | 0,09817 | 0,3812 |
| TcCLB.509289.30  | hypothetical protein, conserved                          | 0,09808 | 0,3846 |
| TcCLB.508165.115 | mucin TcMUCII (pseudogene), putative                     | 0,09807 | 0,8618 |
| TcCLB.503479.70  | bilobe protein, conserved                                | 0,098   | 0,2931 |
| TcCLB.507519.20  | hypothetical protein, conserved                          | 0,09798 | 0,4364 |
| TcCLB.509799.70  | hypothetical protein, conserved                          | 0,09788 | 0,4837 |
| TcCLB.511837.129 | RNA-binding protein, putative                            | 0,09787 | 0,532  |
| TcCLB.507059.70  | dihydroorotase, putative                                 | 0,09768 | 0,5462 |
| TcCLB.503583.30  | hypothetical protein, conserved                          | 0,09757 | 0,5846 |
| TcCLB.509451.70  | hypothetical protein, conserved                          | 0,09755 | 0,4177 |
| TcCLB.511215.14  | hypothetical protein, conserved                          | 0,09755 | 0,5957 |
| TcCLB.511167.10  | NADH-cytochrome b5 reductase, putative                   | 0,09755 | 0,6307 |
| TcCLB.509637.9   | hypothetical protein, conserved                          | 0,09753 | 0,635  |
| TcCLB.511277.610 | surface protease GP63, putative                          | 0,09748 | 0,6581 |
| TcCLB.503717.120 | trans-sialidase, Group V, putative                       | 0,09723 | 0,8111 |
| TcCLB.511459.20  | hypothetical protein, conserved                          | 0,09704 | 0,5053 |
| TcCLB.511847.80  | hypothetical protein, conserved                          | 0,09699 | 0,5183 |
| TcCLB.510889.20  | hypothetical protein, conserved                          | 0,09693 | 0,5836 |
| TcCLB.506575.54  | hypothetical protein, conserved                          | 0,09688 | 0,7173 |



|                  |                                                           |         |        |
|------------------|-----------------------------------------------------------|---------|--------|
| TcCLB.509733.30  | hypothetical protein, conserved                           | 0,09667 | 0,5102 |
| TcCLB.506303.90  | hypothetical protein, conserved                           | 0,09665 | 0,5137 |
| TcCLB.510737.100 | hypothetical protein, conserved                           | 0,09647 | 0,4212 |
| TcCLB.508857.70  | hypothetical protein, conserved                           | 0,0964  | 0,5219 |
| TcCLB.508933.40  | hypothetical protein                                      | 0,09629 | 0,765  |
| TcCLB.510659.100 | hypothetical protein, conserved                           | 0,09621 | 0,6659 |
| TcCLB.510497.60  | mucin TcMUCII, putative                                   | 0,09617 | 0,8626 |
| TcCLB.507987.10  | trans-sialidase, putative                                 | 0,09609 | 0,8603 |
| TcCLB.507875.50  | hypothetical protein                                      | 0,09608 | 0,7469 |
| TcCLB.508541.240 | casein kinase, putative                                   | 0,09602 | 0,841  |
| TcCLB.506221.100 | hypothetical protein, conserved                           | 0,096   | 0,5198 |
| TcCLB.511001.230 | hypothetical protein, conserved                           | 0,09596 | 0,5156 |
| TcCLB.511585.310 | trans-sialidase (pseudogene), putative                    | 0,09593 | 0,6781 |
| TcCLB.507081.60  | helicase-like protein, putative                           | 0,0959  | 0,3747 |
| TcCLB.503499.10  | hypothetical protein, conserved                           | 0,09581 | 0,4315 |
| TcCLB.503433.20  | hypothetical protein, conserved                           | 0,09581 | 0,5562 |
| TcCLB.504431.20  | hypothetical protein                                      | 0,09567 | 0,6359 |
| TcCLB.510437.70  | hypothetical protein, conserved                           | 0,0956  | 0,5804 |
| TcCLB.506855.140 | synaptobrevin, putative                                   | 0,09551 | 0,5023 |
| TcCLB.506871.50  | ubiquitin hydrolase, putative                             | 0,09549 | 0,6448 |
| TcCLB.511895.10  | receptor-type adenylate cyclase, putative                 | 0,09547 | 0,6584 |
| TcCLB.507609.20  | hypothetical protein, conserved                           | 0,09536 | 0,7294 |
| TcCLB.511183.560 | mucin-associated surface protein (MASP), putative         | 0,09496 | 0,832  |
| TcCLB.510763.100 | trypanin-like protein, putative                           | 0,09494 | 0,4828 |
| TcCLB.506985.40  | Polyamine transporter 1, putative (POT1.1)                | 0,09478 | 0,4928 |
| TcCLB.509923.9   | dispersed gene family protein 1 (DGF-1), putative (fragme | 0,09478 | 0,7662 |
| TcCLB.507515.60  | hypothetical protein, conserved                           | 0,09471 | 0,6184 |
| TcCLB.508355.150 | proteasome regulatory non-ATPase subunit 3, putative      | 0,09468 | 0,2973 |
| TcCLB.504255.50  | hypothetical protein, conserved                           | 0,09456 | 0,5623 |
| TcCLB.508409.230 | UBX domain-containing protein                             | 0,09416 | 0,4647 |
| TcCLB.509631.20  | mucin-associated surface protein (MASP), putative         | 0,09408 | 0,8114 |
| TcCLB.510877.140 | hypothetical protein, conserved                           | 0,09404 | 0,5319 |
| TcCLB.508777.20  | hypothetical protein, conserved                           | 0,09399 | 0,6891 |
| TcCLB.507881.10  | retrotransposon hot spot protein (RHS, pseudogene), putat | 0,09392 | 0,6261 |
| TcCLB.511255.230 | mucin-associated surface protein (MASP, pseudogene), pu   | 0,09388 | 0,8548 |
| TcCLB.506831.40  | 3-hydroxy-3-methylglutaryl-CoA reductase (HMGR)           | 0,09382 | 0,3611 |
| TcCLB.509003.40  | calpain-like cysteine peptidase, putative                 | 0,09381 | 0,7221 |
| TcCLB.510889.300 | hypothetical protein                                      | 0,09365 | 0,6311 |
| TcCLB.510939.20  | hypothetical protein, conserved                           | 0,09365 | 0,7188 |
| TcCLB.511397.10  | mucin-associated surface protein (MASP, pseudogene), pu   | 0,09335 | 0,8561 |
| TcCLB.508737.187 | hypothetical protein, conserved                           | 0,09311 | 0,534  |
| TcCLB.510285.70  | kinetoplastid kinetochore protein 2, putative (kkt2)      | 0,0931  | 0,5021 |
| TcCLB.508871.40  | mucin-associated surface protein (MASP), putative         | 0,0931  | 0,8468 |
| TcCLB.506737.30  | hypothetical protein, conserved                           | 0,09304 | 0,5617 |
| TcCLB.508919.40  | hypothetical protein, conserved                           | 0,09302 | 0,489  |

|                   |                                                           |         |        |
|-------------------|-----------------------------------------------------------|---------|--------|
| TcCLB.509203.50   | hypothetical protein                                      | 0,09298 | 0,4482 |
| TcCLB.504867.20   | ABC transporter, putative                                 | 0,09287 | 0,3761 |
| TcCLB.506147.50   | hypothetical protein, conserved                           | 0,09283 | 0,5618 |
| TcCLB.510201.15   | mucin TcMUCII (pseudogene), putative                      | 0,09275 | 0,805  |
| TcCLB.508697.10   | trans-sialidase, Group V, putative                        | 0,09272 | 0,7886 |
| TcCLB.506481.10   | tRNA pseudouridine synthase A-like protein (pseudogene),  | 0,09259 | 0,6293 |
| TcCLB.506375.80   | hypothetical protein, conserved                           | 0,09254 | 0,701  |
| TcCLB.510603.130  | hypothetical protein, conserved                           | 0,09248 | 0,3469 |
| TcCLB.508881.40   | hypothetical protein, conserved                           | 0,09247 | 0,5227 |
| TcCLB.506241.170  | 40S ribosomal protein S6, putative                        | 0,09242 | 0,3085 |
| TcCLB.508375.60   | succinate dehydrogenase subunit                           | 0,09235 | 0,5638 |
| TcCLB.511001.220  | hypothetical protein, conserved                           | 0,0923  | 0,4986 |
| TcCLB.503453.64   | hypothetical protein, conserved                           | 0,09217 | 0,6018 |
| TcCLB.510187.380  | hypothetical protein, conserved                           | 0,09208 | 0,5414 |
| TcCLB.504161.40   | hypothetical protein, conserved                           | 0,09201 | 0,514  |
| TcCLB.506067.240  | mucin-associated surface protein (MASP), putative         | 0,092   | 0,9128 |
| TcCLB.510021.90   | hypothetical protein, conserved (pseudogene)              | 0,09195 | 0,8759 |
| TcCLB.509799.30   | adenylyl cyclase-associated protein, putative             | 0,09182 | 0,5449 |
| TcCLB.504625.50   | dual specificity protein phosphatase or MAP kinase phosph | 0,09176 | 0,5598 |
| TcCLB.504131.130  | hypothetical protein, conserved                           | 0,0916  | 0,5446 |
| TcCLB.504427.60   | hypothetical protein, conserved                           | 0,09159 | 0,6323 |
| TcCLB.505363.10   | trans-sialidase, Group II, putative                       | 0,09127 | 0,809  |
| TcCLB.506753.80   | hypothetical protein, conserved                           | 0,09122 | 0,5623 |
| TcCLB.507667.11   | hypothetical protein, conserved (fragment)                | 0,09115 | 0,62   |
| TcCLB.511109.40   | hypothetical protein, conserved                           | 0,09112 | 0,5417 |
| TcCLB.506959.60   | hypothetical protein, conserved                           | 0,09101 | 0,6438 |
| TcCLB.503635.89   | hypothetical protein, conserved                           | 0,09097 | 0,6355 |
| TcCLB.503801.20   | ribosomal protein S26, putative                           | 0,09089 | 0,3281 |
| TcCLB.506469.148  | hypothetical protein, conserved                           | 0,09078 | 0,5234 |
| TcCLB.509859.40   | cytosolic leucyl aminopeptidase, putative                 | 0,09059 | 0,4106 |
| TcCLB.510127.79   | actin 3, putative (fragment)                              | 0,09044 | 0,4893 |
| TcCLB.509799.40   | hypothetical protein, conserved                           | 0,09042 | 0,5427 |
| TcCLB.505267.30   | beta galactofuranosyl glycosyltransferase, putative       | 0,09042 | 0,7946 |
| TcCLB.511529.140  | hypothetical protein, conserved                           | 0,09028 | 0,4414 |
| TcCLB.509017.60   | hypothetical protein, conserved                           | 0,09006 | 0,4418 |
| TcCLB.506899.30   | mucin-associated surface protein (MASP, pseudogene), pu   | 0,09005 | 0,8934 |
| TcCLB.508851.19   | retrotransposon hot spot (RHS) protein, putative          | 0,08994 | 0,5163 |
| TcCLB.506217.20   | beta galactofuranosyl glycosyltransferase (pseudogene), p | 0,08981 | 0,7486 |
| TcCLB.504053.10   | hypothetical protein, conserved (pseudogene)              | 0,08972 | 0,4324 |
| TcCLB.511907.270  | ubiquitin-conjugating enzyme E2, putative                 | 0,08958 | 0,542  |
| TcCLB.506459.30   | trans-sialidase (pseudogene), putative                    | 0,08953 | 0,6954 |
| TcCLB.508723.110  | hypothetical protein                                      | 0,08934 | 0,4681 |
| TcCLB.510941.6    | hypothetical protein, conserved                           | 0,08913 | 0,5417 |
| TcCLB.506577.30   | hypothetical protein, conserved                           | 0,0891  | 0,5414 |
| TcCLB.508153.1020 | hypothetical protein, conserved                           | 0,08904 | 0,6445 |

|                  |                                                         |         |        |
|------------------|---------------------------------------------------------|---------|--------|
| TcCLB.503625.20  | hypothetical protein                                    | 0,08904 | 0,7531 |
| TcCLB.506629.130 | hypothetical protein, conserved                         | 0,08901 | 0,6001 |
| TcCLB.414145.9   | hypothetical protein, conserved (fragment)              | 0,08899 | 0,6703 |
| TcCLB.508233.19  | hypothetical protein, conserved                         | 0,08898 | 0,7281 |
| TcCLB.508239.10  | origin recognition complex subunit 1 (ORC1), putative   | 0,08889 | 0,5771 |
| TcCLB.506973.50  | trans-sialidase (pseudogene), putative                  | 0,08888 | 0,816  |
| TcCLB.507975.50  | trans-sialidase (pseudogene), putative                  | 0,08879 | 0,3741 |
| TcCLB.509157.110 | hypothetical protein, conserved                         | 0,08878 | 0,7181 |
| TcCLB.506763.210 | hypothetical protein                                    | 0,08875 | 0,8544 |
| TcCLB.506627.10  | AMP deaminase 2, putative                               | 0,08872 | 0,5156 |
| TcCLB.511011.30  | hypothetical protein, conserved (pseudogene)            | 0,08849 | 0,7251 |
| TcCLB.510699.89  | mucin-associated surface protein (MASP), putative       | 0,08836 | 0,8854 |
| TcCLB.510417.20  | mucin-associated surface protein (MASP, pseudogene), pu | 0,08825 | 0,8192 |
| TcCLB.506941.130 | hypothetical protein, conserved                         | 0,08818 | 0,5429 |
| TcCLB.506051.30  | dispersed gene family protein 1 (DGF-1), putative       | 0,08818 | 0,829  |
| TcCLB.511239.140 | 60S ribosomal protein, putative                         | 0,08815 | 0,6692 |
| TcCLB.503973.240 | mucin-associated surface protein (MASP), putative       | 0,08801 | 0,8536 |
| TcCLB.464807.20  | hypothetical protein, conserved (fragment)              | 0,08799 | 0,5524 |
| TcCLB.506361.18  | mucin TcMUC (pseudogene), putative                      | 0,08778 | 0,8941 |
| TcCLB.509297.10  | hypothetical protein, conserved                         | 0,08776 | 0,6842 |
| TcCLB.508221.960 | mucin-associated surface protein (MASP), putative       | 0,08749 | 0,8239 |
| TcCLB.506785.30  | mucin TcMUCII, putative                                 | 0,08735 | 0,905  |
| TcCLB.511081.71  | hypothetical protein, conserved (pseudogene)            | 0,08729 | 0,853  |
| TcCLB.506369.9   | hypothetical protein, conserved                         | 0,08723 | 0,765  |
| TcCLB.511887.30  | trans-sialidase (pseudogene), putative                  | 0,08721 | 0,7051 |
| TcCLB.511767.100 | hypothetical protein, conserved                         | 0,08717 | 0,8084 |
| TcCLB.509157.40  | hypothetical protein, conserved                         | 0,08707 | 0,6886 |
| TcCLB.511051.39  | 40S ribosomal protein S4, putative                      | 0,08704 | 0,3162 |
| TcCLB.506303.60  | protein kinase, putative                                | 0,08701 | 0,6336 |
| TcCLB.508615.10  | mucin-associated surface protein (MASP), putative       | 0,087   | 0,8902 |
| TcCLB.510657.210 | hypothetical protein                                    | 0,08679 | 0,7141 |
| TcCLB.507019.83  | 40S ribosomal protein S30, putative                     | 0,08673 | 0,417  |
| TcCLB.508397.30  | SPFH domain / Band 7 family protein, putative           | 0,08652 | 0,5973 |
| TcCLB.504173.60  | hypothetical protein, conserved                         | 0,08645 | 0,5022 |
| TcCLB.508883.39  | mucin-associated surface protein (MASP, pseudogene), pu | 0,08645 | 0,7956 |
| TcCLB.510531.20  | hypothetical protein, conserved                         | 0,0864  | 0,6552 |
| TcCLB.511277.84  | dynein light chain Tctex-type, putative                 | 0,0863  | 0,71   |
| TcCLB.507867.31  | mucin TcMUCII (pseudogene), putative                    | 0,08628 | 0,7003 |
| TcCLB.510877.150 | hypothetical protein, conserved                         | 0,08623 | 0,4647 |
| TcCLB.506177.90  | hypothetical protein, conserved                         | 0,08597 | 0,7773 |
| TcCLB.510021.210 | mucin-associated surface protein (MASP, pseudogene), pu | 0,08591 | 0,9068 |
| TcCLB.509633.30  | hypothetical protein, conserved                         | 0,08584 | 0,5892 |
| TcCLB.506599.210 | mucin-associated surface protein (MASP), putative       | 0,08575 | 0,8492 |
| TcCLB.510323.20  | hypothetical protein, conserved                         | 0,0857  | 0,3689 |
| TcCLB.506703.140 | mucin-associated surface protein (MASP), putative       | 0,08559 | 0,9418 |

|                  |                                                           |         |        |
|------------------|-----------------------------------------------------------|---------|--------|
| TcCLB.509537.50  | Flagellar Member 1 (FLAM1)                                | 0,08557 | 0,4203 |
| TcCLB.510121.110 | hypothetical protein, conserved                           | 0,08555 | 0,433  |
| TcCLB.510663.19  | 60S ribosomal subunit protein L31, putative               | 0,08538 | 0,5303 |
| TcCLB.509769.36  | palmitoyl acyltransferase 12, putative                    | 0,08538 | 0,5899 |
| TcCLB.510889.340 | hypothetical protein, conserved                           | 0,08537 | 0,7761 |
| TcCLB.511753.80  | GTPase activating protein, putative                       | 0,08528 | 0,614  |
| TcCLB.507019.86  | 40S ribosomal protein S30, putative                       | 0,08523 | 0,5268 |
| TcCLB.509611.189 | hypothetical protein, conserved                           | 0,08516 | 0,4224 |
| TcCLB.509551.40  | hypothetical protein, conserved                           | 0,08512 | 0,6784 |
| TcCLB.504575.40  | adrenodoxin precursor, putative                           | 0,08509 | 0,7971 |
| TcCLB.510175.200 | retrotransposon hot spot protein (RHS, pseudogene), putat | 0,08501 | 0,7759 |
| TcCLB.511239.90  | hypothetical protein                                      | 0,08499 | 0,5659 |
| TcCLB.511435.40  | hypothetical protein, conserved                           | 0,08497 | 0,5417 |
| TcCLB.506413.30  | 40S ribosomal protein S33, putative                       | 0,08476 | 0,6867 |
| TcCLB.509177.68  | translation initiation factor, putative                   | 0,08475 | 0,6364 |
| TcCLB.504213.29  | hypothetical protein, conserved                           | 0,08467 | 0,6715 |
| TcCLB.508443.50  | hypothetical protein, conserved                           | 0,08448 | 0,6652 |
| TcCLB.506993.140 | hypothetical protein                                      | 0,08431 | 0,8876 |
| TcCLB.511771.132 | ATP-dependent DEAD/H RNA helicase (pseudogene), putat     | 0,08422 | 0,883  |
| TcCLB.508317.20  | hypothetical protein, conserved                           | 0,08414 | 0,6421 |
| TcCLB.509655.10  | trans-sialidase (pseudogene), putative                    | 0,08408 | 0,8125 |
| TcCLB.506413.60  | hypothetical protein, conserved                           | 0,08374 | 0,7998 |
| TcCLB.507875.60  | beta galactofuranosyl glycosyltransferase, putative       | 0,08369 | 0,7282 |
| TcCLB.511189.60  | hypothetical protein, conserved                           | 0,08361 | 0,5927 |
| TcCLB.510409.20  | hypothetical protein, conserved (pseudogene)              | 0,08349 | 0,7757 |
| TcCLB.507669.180 | hypothetical protein, conserved                           | 0,08345 | 0,5147 |
| TcCLB.510357.50  | hypothetical protein, conserved                           | 0,08336 | 0,674  |
| TcCLB.511291.120 | DNA-directed RNA polymerase III subunit C11, putative (RF | 0,0833  | 0,698  |
| TcCLB.506357.29  | dynein light chain Tctex-type, putative                   | 0,08328 | 0,7186 |
| TcCLB.504055.20  | hypothetical protein, conserved                           | 0,08314 | 0,6867 |
| TcCLB.507979.40  | hypothetical protein, conserved                           | 0,08313 | 0,7779 |
| TcCLB.508805.100 | hypothetical protein, conserved                           | 0,08294 | 0,5495 |
| TcCLB.509979.60  | sec1 family transport protein, putative                   | 0,08279 | 0,62   |
| TcCLB.506209.70  | dispersed gene family protein 1 (DGF-1), putative         | 0,08265 | 0,8233 |
| TcCLB.508241.120 | rrp44p homologue, putative                                | 0,08264 | 0,3262 |
| TcCLB.511753.60  | ESAG8-associated protein, putative (PIE8)                 | 0,08255 | 0,6832 |
| TcCLB.509497.30  | agmatinase, putative                                      | 0,08241 | 0,6628 |
| TcCLB.506227.30  | hypothetical protein, conserved                           | 0,08228 | 0,534  |
| TcCLB.460125.10  | hypothetical protein, conserved (fragment)                | 0,08228 | 0,7606 |
| TcCLB.511259.200 | mucin-associated surface protein (MASP, pseudogene), pu   | 0,08226 | 0,8761 |
| TcCLB.511025.50  | glucosamine-6-phosphate isomerase, putative               | 0,08223 | 0,4087 |
| TcCLB.511145.46  | 60S ribosomal protein L37a, putative                      | 0,08222 | 0,4905 |
| TcCLB.509899.50  | mucin-associated surface protein (MASP, pseudogene), pu   | 0,08197 | 0,7924 |
| TcCLB.509109.114 | mitochondrial carrier protein, putative                   | 0,08192 | 0,6521 |
| TcCLB.508879.40  | hypothetical protein, conserved                           | 0,08187 | 0,5472 |

|                  |                                                           |         |        |
|------------------|-----------------------------------------------------------|---------|--------|
| TcCLB.511121.20  | hypothetical protein                                      | 0,08186 | 0,8504 |
| TcCLB.508593.69  | hypothetical protein, conserved                           | 0,08184 | 0,7899 |
| TcCLB.508109.60  | trans-sialidase, Group V, putative                        | 0,08167 | 0,8385 |
| TcCLB.511511.50  | hypothetical protein, conserved                           | 0,08165 | 0,5567 |
| TcCLB.506683.30  | hypothetical protein, conserved                           | 0,08162 | 0,7666 |
| TcCLB.508089.20  | UDP-glucuronosyl and UDP-glucosyl transferase, putative   | 0,08155 | 0,6344 |
| TcCLB.509961.30  | hypothetical protein, conserved                           | 0,0815  | 0,5755 |
| TcCLB.509393.20  | hypothetical protein, conserved                           | 0,08143 | 0,6315 |
| TcCLB.511483.40  | prefoldin subunit 2, putative                             | 0,08136 | 0,6475 |
| TcCLB.461927.9   | adenosine monophosphate deaminase, putative               | 0,08133 | 0,6568 |
| TcCLB.506633.109 | hypothetical protein (fragment)                           | 0,08124 | 0,6721 |
| TcCLB.506201.120 | hypothetical protein, conserved                           | 0,08119 | 0,5713 |
| TcCLB.504795.9   | dispersed gene family protein 1 (DGF-1), putative         | 0,08119 | 0,7481 |
| TcCLB.511421.90  | hypothetical protein, conserved                           | 0,08094 | 0,615  |
| TcCLB.507723.140 | hypothetical protein, conserved                           | 0,08086 | 0,6823 |
| TcCLB.506357.100 | DNA-directed RNA polymerase I subunit RPB5z, putative (F  | 0,08083 | 0,6614 |
| TcCLB.506965.70  | mucin-associated surface protein (MASP), putative         | 0,08082 | 0,8188 |
| TcCLB.437575.9   | GDP-mannose 4,6 dehydratase, putative                     | 0,08081 | 0,8543 |
| TcCLB.509507.20  | hypothetical protein, conserved                           | 0,08072 | 0,5099 |
| TcCLB.511337.39  | hypothetical protein, conserved                           | 0,08071 | 0,7184 |
| TcCLB.503703.90  | hypothetical protein, conserved                           | 0,08065 | 0,6727 |
| TcCLB.503589.19  | hypothetical protein, conserved                           | 0,08062 | 0,7735 |
| TcCLB.506459.180 | trans-sialidase, Group V, putative                        | 0,0806  | 0,8087 |
| TcCLB.509805.50  | hypothetical protein, conserved                           | 0,08052 | 0,6886 |
| TcCLB.507223.20  | hypothetical protein, conserved                           | 0,08051 | 0,8346 |
| TcCLB.508761.30  | mucin-associated surface protein (MASP), putative         | 0,0805  | 0,805  |
| TcCLB.511423.140 | hypothetical protein, conserved                           | 0,08033 | 0,5373 |
| TcCLB.510889.10  | hypothetical protein, conserved                           | 0,08029 | 0,7116 |
| TcCLB.503775.10  | surface protease GP63 (pseudogene), putative              | 0,08029 | 0,8353 |
| TcCLB.507875.130 | trans-sialidase (pseudogene), putative                    | 0,08022 | 0,8085 |
| TcCLB.503925.90  | hypothetical protein, conserved                           | 0,08021 | 0,8155 |
| TcCLB.505071.104 | hypothetical protein, conserved                           | 0,08018 | 0,784  |
| TcCLB.507029.20  | DNA-J protein, putative                                   | 0,08006 | 0,6512 |
| TcCLB.509747.60  | hypothetical protein, conserved                           | 0,07997 | 0,5472 |
| TcCLB.510055.30  | hypothetical protein, conserved                           | 0,07996 | 0,8182 |
| TcCLB.509897.160 | trans-sialidase (pseudogene), putative                    | 0,07989 | 0,7557 |
| TcCLB.503955.89  | hypothetical protein, conserved                           | 0,07973 | 0,6342 |
| TcCLB.506563.100 | hypothetical protein, conserved                           | 0,0797  | 0,4992 |
| TcCLB.511111.20  | hypothetical protein                                      | 0,0797  | 0,6104 |
| TcCLB.466529.9   | hypothetical protein, conserved                           | 0,07961 | 0,7006 |
| TcCLB.510719.30  | ribosomal protein L29, putative                           | 0,07955 | 0,5393 |
| TcCLB.507001.20  | hypothetical protein, conserved                           | 0,07953 | 0,6976 |
| TcCLB.506567.20  | hypothetical protein                                      | 0,07948 | 0,6495 |
| TcCLB.507233.60  | retrotransposon hot spot protein (RHS, pseudogene), putat | 0,07934 | 0,6598 |
| TcCLB.509897.170 | mucin-associated surface protein (MASP, pseudogene), pu   | 0,07932 | 0,7919 |

|                  |                                                              |         |        |
|------------------|--------------------------------------------------------------|---------|--------|
| TcCLB.508295.40  | mucin-associated surface protein (MASP), putative            | 0,07931 | 0,8985 |
| TcCLB.507513.110 | hypothetical protein                                         | 0,07927 | 0,6195 |
| TcCLB.511217.140 | coatomer delta subunit, putative                             | 0,07926 | 0,4511 |
| TcCLB.508373.10  | glutamine dependent carbamoyl-phosphate synthase, puta       | 0,07926 | 0,5065 |
| TcCLB.506503.140 | extracellular receptor, putative                             | 0,0792  | 0,5022 |
| TcCLB.510279.250 | mucin-associated surface protein (MASP), putative            | 0,0792  | 0,9162 |
| TcCLB.507083.50  | hypothetical protein, conserved                              | 0,07919 | 0,6926 |
| TcCLB.509805.260 | dispersed gene family protein 1 (DGF-1, pseudogene), puta    | 0,07911 | 0,6756 |
| TcCLB.508831.40  | hypothetical protein, conserved                              | 0,07909 | 0,7844 |
| TcCLB.509065.33  | hypothetical protein, conserved                              | 0,07898 | 0,7279 |
| TcCLB.509611.89  | hypothetical protein, conserved                              | 0,07898 | 0,7616 |
| TcCLB.506919.70  | hypothetical protein, conserved (pseudogene)                 | 0,07898 | 0,8499 |
| TcCLB.510359.680 | mucin-associated surface protein (MASP, pseudogene), pu      | 0,07888 | 0,8854 |
| TcCLB.510293.60  | hypothetical protein, conserved                              | 0,07886 | 0,6867 |
| TcCLB.506581.60  | hypothetical protein, conserved                              | 0,07873 | 0,636  |
| TcCLB.511809.50  | hypothetical protein, conserved                              | 0,07868 | 0,6682 |
| TcCLB.511717.20  | hypothetical protein, conserved                              | 0,07863 | 0,5621 |
| TcCLB.511445.20  | radial spoke protein 3, putative (RSP3)                      | 0,07855 | 0,5827 |
| TcCLB.506855.120 | hypothetical protein, conserved                              | 0,07846 | 0,5563 |
| TcCLB.511557.50  | Present in the outer mitochondrial membrane proteome 1       | 0,0784  | 0,6867 |
| TcCLB.505999.189 | hypothetical protein, conserved (pseudogene)                 | 0,07837 | 0,7721 |
| TcCLB.506859.70  | guide RNA associated protein, GAP2, putative                 | 0,07832 | 0,4045 |
| TcCLB.510285.100 | eukaryotic translation initiation factor 4 gamma, putative   | 0,07811 | 0,4999 |
| TcCLB.508409.130 | protein transport protein Sec24A, putative                   | 0,07803 | 0,3744 |
| TcCLB.510359.371 | elongation factor 1-gamma (EF-1-gamma, pseudogene), p        | 0,07803 | 0,8061 |
| TcCLB.506755.279 | hypothetical protein, conserved                              | 0,078   | 0,6293 |
| TcCLB.506147.30  | synaptojanin (N-terminal domain), putative                   | 0,07796 | 0,5382 |
| TcCLB.508365.30  | mucin TcMUCII, putative                                      | 0,07792 | 0,8828 |
| TcCLB.509631.150 | hypothetical protein, conserved                              | 0,07783 | 0,8223 |
| TcCLB.504123.50  | hypothetical protein, conserved (pseudogene)                 | 0,07781 | 0,5012 |
| TcCLB.511539.18  | hypothetical protein, conserved                              | 0,07779 | 0,6549 |
| TcCLB.506025.70  | dolichyl-lipid chaperone, putative (rft1)                    | 0,07749 | 0,7281 |
| TcCLB.507001.130 | hypothetical protein, conserved                              | 0,07747 | 0,6301 |
| TcCLB.508139.120 | hypothetical protein                                         | 0,07745 | 0,8752 |
| TcCLB.504215.50  | hypothetical protein, conserved                              | 0,07734 | 0,5537 |
| TcCLB.503899.10  | heat shock 70 kDa protein, putative                          | 0,07728 | 0,6092 |
| TcCLB.509799.10  | adaptin complex 4 subunit, putative                          | 0,07719 | 0,6411 |
| TcCLB.511291.10  | intraflagellar transport protein 80, putative (fragment) (IF | 0,07714 | 0,6872 |
| TcCLB.507017.100 | hypothetical protein, conserved                              | 0,07688 | 0,7533 |
| TcCLB.510123.50  | iron-sulfur cluster assembly protein, putative               | 0,07683 | 0,6099 |
| TcCLB.509429.220 | dolichyl-P-Man:GDP-Man5GlcNAc2-PP-dolichyl alpha-1,2-n       | 0,0768  | 0,5756 |
| TcCLB.511487.100 | retrotransposon hot spot protein (RHS, pseudogene), putat    | 0,07677 | 0,7304 |
| TcCLB.510691.95  | hypothetical protein, conserved (fragment)                   | 0,07675 | 0,713  |
| TcCLB.503697.9   | proteasome regulatory non-ATPase subunit 11, putative (fr    | 0,07672 | 0,6165 |
| TcCLB.511173.440 | trans-sialidase, Group V, putative                           | 0,07663 | 0,8252 |

|                  |                                                          |         |        |
|------------------|----------------------------------------------------------|---------|--------|
| TcCLB.506493.30  | hypothetical protein, conserved                          | 0,0766  | 0,5926 |
| TcCLB.507089.260 | CYC2-like cyclin, putative                               | 0,07654 | 0,6271 |
| TcCLB.508927.10  | hypothetical protein, conserved                          | 0,07653 | 0,7394 |
| TcCLB.506459.100 | surface protease GP63 (pseudogene), putative             | 0,07647 | 0,8885 |
| TcCLB.506443.60  | hypothetical protein                                     | 0,07638 | 0,6011 |
| TcCLB.508633.100 | retrotransposon hot spot (RHS) protein, putative         | 0,07636 | 0,7147 |
| TcCLB.508207.110 | 60S ribosomal protein L7, putative                       | 0,07633 | 0,3373 |
| TcCLB.510729.220 | hypothetical protein, conserved                          | 0,07632 | 0,3604 |
| TcCLB.511089.5   | trans-sialidase (pseudogene), putative                   | 0,07618 | 0,9228 |
| TcCLB.506925.520 | hypothetical protein, conserved                          | 0,07615 | 0,5928 |
| TcCLB.509569.50  | guanine nucleotide exchange factor subunit GCD7          | 0,07614 | 0,5695 |
| TcCLB.508257.204 | hypothetical protein, conserved                          | 0,07609 | 0,6442 |
| TcCLB.506265.70  | hypothetical protein, conserved                          | 0,07606 | 0,6067 |
| TcCLB.508541.225 | casein kinase, putative                                  | 0,07601 | 0,6424 |
| TcCLB.510715.11  | hypothetical protein                                     | 0,07598 | 0,7834 |
| TcCLB.510575.180 | adenylate kinase, putative                               | 0,07591 | 0,696  |
| TcCLB.506295.140 | hypothetical protein, conserved                          | 0,07571 | 0,6121 |
| TcCLB.506289.120 | mucin-associated surface protein (MASP), putative        | 0,07562 | 0,7959 |
| TcCLB.510307.180 | glycine dehydrogenase [decarboxylating] (pseudogene), pu | 0,07557 | 0,5685 |
| TcCLB.503971.30  | hypothetical protein, conserved                          | 0,07552 | 0,7327 |
| TcCLB.506563.20  | exosome-associated protein 1, putative (EAP1)            | 0,07537 | 0,6805 |
| TcCLB.505939.30  | hypothetical protein, conserved                          | 0,07535 | 0,4988 |
| TcCLB.507483.20  | ef-hand protein 5, putative                              | 0,07522 | 0,6909 |
| TcCLB.507911.40  | hypothetical protein, conserved (pseudogene)             | 0,07507 | 0,7134 |
| TcCLB.506289.250 | surface protease GP63 (pseudogene), putative             | 0,07507 | 0,8949 |
| TcCLB.506737.121 | mucin-associated surface protein (MASP, pseudogene), pu  | 0,07481 | 0,6503 |
| TcCLB.510219.20  | hypothetical protein, conserved                          | 0,07465 | 0,7195 |
| TcCLB.511087.10  | mucin-associated surface protein (MASP, pseudogene), pu  | 0,07462 | 0,8622 |
| TcCLB.511421.170 | hypothetical protein, conserved                          | 0,07461 | 0,6195 |
| TcCLB.507231.30  | mucin-associated surface protein (MASP), putative        | 0,07456 | 0,8632 |
| TcCLB.511633.70  | protein kinase, putative                                 | 0,07429 | 0,5284 |
| TcCLB.507811.114 | hypothetical protein, conserved                          | 0,07428 | 0,6306 |
| TcCLB.509105.110 | hypothetical protein, conserved                          | 0,0742  | 0,6116 |
| TcCLB.510105.170 | dihydrolipoamide acetyltransferase precursor, putative   | 0,07416 | 0,4872 |
| TcCLB.511807.6   | ATP-dependent DEAD/H RNA helicase (pseudogene), putat    | 0,07395 | 0,6652 |
| TcCLB.509203.79  | guanine-nucleotide-exchange-factor, putative (fragment)  | 0,07384 | 0,7495 |
| TcCLB.508789.150 | mucin-associated surface protein (MASP), putative        | 0,0737  | 0,8444 |
| TcCLB.511735.88  | hypothetical protein, conserved (fragment)               | 0,07367 | 0,8385 |
| TcCLB.510259.12  | hypothetical protein, conserved                          | 0,07366 | 0,8238 |
| TcCLB.507847.20  | mucin-associated surface protein (MASP, pseudogene), pu  | 0,07326 | 0,698  |
| TcCLB.490507.10  | hypothetical protein, conserved                          | 0,07323 | 0,6505 |
| TcCLB.503703.40  | hypothetical protein, conserved                          | 0,07319 | 0,654  |
| TcCLB.507527.4   | dolichyl-P-Man:GDP-Man5GlcNAc2-PP-dolichyl alpha-1,2-n   | 0,07317 | 0,7908 |
| TcCLB.503647.40  | hypothetical protein                                     | 0,07312 | 0,7007 |
| TcCLB.508527.30  | trans-sialidase (pseudogene), putative                   | 0,07311 | 0,7132 |

|                  |                                                             |         |        |
|------------------|-------------------------------------------------------------|---------|--------|
| TcCLB.503925.20  | hypothetical protein, conserved                             | 0,07295 | 0,5997 |
| TcCLB.510361.190 | mucin-associated surface protein (MASP), putative           | 0,07289 | 0,8865 |
| TcCLB.508407.4   | hypothetical protein, conserved                             | 0,07273 | 0,8739 |
| TcCLB.509767.40  | hypothetical protein, conserved                             | 0,07272 | 0,6246 |
| TcCLB.448661.10  | mucin-associated surface protein (MASP), putative (fragm    | 0,07266 | 0,8828 |
| TcCLB.509645.10  | hypothetical protein, conserved                             | 0,07264 | 0,5604 |
| TcCLB.510081.11  | hypothetical protein, conserved (pseudogene)                | 0,0726  | 0,6483 |
| TcCLB.510061.30  | trans-sialidase, Group V, putative                          | 0,07254 | 0,8104 |
| TcCLB.506999.80  | hypothetical protein, conserved                             | 0,07248 | 0,6986 |
| TcCLB.503425.10  | hypothetical protein, conserved                             | 0,07245 | 0,632  |
| TcCLB.511907.160 | mucin-associated surface protein (MASP, pseudogene), pu     | 0,07245 | 0,7597 |
| TcCLB.509011.70  | adrenodoxin precursor, putative                             | 0,0723  | 0,7715 |
| TcCLB.506629.110 | hypothetical protein, conserved                             | 0,07221 | 0,659  |
| TcCLB.505037.50  | small GTP-binding protein RAB6, putative                    | 0,0722  | 0,5515 |
| TcCLB.509695.184 | 40S ribosomal protein S23, putative                         | 0,0721  | 0,4524 |
| TcCLB.508277.340 | Eukaryotic translation initiation factor 4 gamma type 2, pu | 0,07202 | 0,4965 |
| TcCLB.506583.20  | hypothetical protein, conserved                             | 0,072   | 0,79   |
| TcCLB.510805.70  | mucin TcMUCII, putative                                     | 0,07188 | 0,9075 |
| TcCLB.507985.20  | retrotransposon hot spot protein (RHS, pseudogene), putat   | 0,07183 | 0,7599 |
| TcCLB.507011.130 | hypothetical protein, conserved                             | 0,07178 | 0,6354 |
| TcCLB.509195.10  | hypothetical protein                                        | 0,07175 | 0,8922 |
| TcCLB.510667.100 | hypothetical protein, conserved                             | 0,07163 | 0,5097 |
| TcCLB.510613.30  | hypothetical protein                                        | 0,07148 | 0,6279 |
| TcCLB.506767.220 | mucin TcMUCII, putative                                     | 0,07142 | 0,9048 |
| TcCLB.506657.88  | hypothetical protein, conserved                             | 0,07141 | 0,912  |
| TcCLB.508277.110 | cAMP specific phosphodiesterase, putative                   | 0,07137 | 0,6579 |
| TcCLB.511217.200 | tyrosyl or methionyl-tRNA synthetase, putative              | 0,07122 | 0,6504 |
| TcCLB.506041.40  | hypothetical protein, conserved                             | 0,07108 | 0,6521 |
| TcCLB.509161.50  | hypothetical protein, conserved                             | 0,07106 | 0,6707 |
| TcCLB.503999.110 | hypothetical protein, conserved (fragment)                  | 0,07098 | 0,8297 |
| TcCLB.510611.40  | hypothetical protein, conserved                             | 0,07096 | 0,614  |
| TcCLB.506797.10  | hypothetical protein, conserved                             | 0,07093 | 0,593  |
| TcCLB.511269.40  | cAMP phosphodiesterase A, putative (PDEA)                   | 0,07088 | 0,7486 |
| TcCLB.508287.10  | dispersed gene family protein 1 (DGF-1), putative           | 0,07084 | 0,9026 |
| TcCLB.511647.42  | hypothetical protein, conserved                             | 0,07081 | 0,7837 |
| TcCLB.507797.9   | nuclear transcription factor, putative                      | 0,0708  | 0,7932 |
| TcCLB.510657.110 | hypothetical protein, conserved                             | 0,07075 | 0,6183 |
| TcCLB.506499.215 | elongation factor 1-gamma (EF-1-gamma, pseudogene), p       | 0,07068 | 0,9069 |
| TcCLB.508881.110 | GTP-binding protein, putative                               | 0,07067 | 0,6739 |
| TcCLB.510295.10  | Enriched in surface-labeled proteome protein 18 (ESP18)     | 0,07063 | 0,6123 |
| TcCLB.511423.100 | kinetoplast ribosomal PPR-repeat containing protein 3, put  | 0,07063 | 0,6244 |
| TcCLB.412093.10  | antigenic protein (pseudogene), putative                    | 0,07063 | 0,8209 |
| TcCLB.503929.50  | hypothetical protein, conserved                             | 0,07061 | 0,7214 |
| TcCLB.504105.60  | hypothetical protein, conserved                             | 0,07027 | 0,6446 |
| TcCLB.511301.20  | hypothetical protein, conserved                             | 0,0702  | 0,6719 |



|                  |                                                               |         |        |
|------------------|---------------------------------------------------------------|---------|--------|
| TcCLB.511287.40  | 40S ribosomal protein S2, putative                            | 0,07018 | 0,3688 |
| TcCLB.504181.10  | 60S ribosomal protein L9, putative                            | 0,07018 | 0,4086 |
| TcCLB.416503.10  | trans-sialidase (pseudogene), putative                        | 0,07007 | 0,6507 |
| TcCLB.506585.90  | RNA processing endonuclease 1, putative                       | 0,07003 | 0,6908 |
| TcCLB.509085.120 | retrotransposon hot spot (RHS) protein, putative              | 0,07002 | 0,7662 |
| TcCLB.511017.40  | hd phosphohydrolase family protein                            | 0,06984 | 0,8125 |
| TcCLB.506795.40  | phosphatidylserine synthase, putative                         | 0,06983 | 0,6708 |
| TcCLB.511107.20  | hypothetical protein, conserved (pseudogene)                  | 0,06969 | 0,6877 |
| TcCLB.503803.20  | hypothetical protein, conserved                               | 0,06969 | 0,7702 |
| TcCLB.507519.10  | hypothetical protein, conserved (pseudogene)                  | 0,0696  | 0,6775 |
| TcCLB.509167.50  | hypothetical protein                                          | 0,06954 | 0,7284 |
| TcCLB.511339.10  | UDP-Gal or UDP-GlcNAc-dependent glycosyltransferase, putative | 0,06939 | 0,8741 |
| TcCLB.506941.170 | ADP-ribosylation factor-like protein, putative                | 0,06935 | 0,7224 |
| TcCLB.508543.30  | 40S ribosomal protein S9, putative                            | 0,06929 | 0,4079 |
| TcCLB.508479.210 | hypothetical protein, conserved                               | 0,06916 | 0,6779 |
| TcCLB.509669.140 | hypothetical protein, conserved                               | 0,06911 | 0,7477 |
| TcCLB.504057.40  | NAD dependent epimerase/dehydratase family, putative (I)      | 0,06903 | 0,5462 |
| TcCLB.511585.90  | hypothetical protein, conserved                               | 0,06902 | 0,5665 |
| TcCLB.506567.130 | hypothetical protein, conserved                               | 0,06899 | 0,7844 |
| TcCLB.503847.80  | hypothetical protein, conserved                               | 0,06895 | 0,6581 |
| TcCLB.509247.20  | ras-related protein Rab21, putative (RAB21)                   | 0,06892 | 0,6909 |
| TcCLB.510579.20  | Peptide deformylase 2, putative (PDF2)                        | 0,0688  | 0,6521 |
| TcCLB.510903.70  | hypothetical protein, conserved                               | 0,06873 | 0,6547 |
| TcCLB.509965.120 | hypothetical protein, conserved                               | 0,06869 | 0,6665 |
| TcCLB.511423.90  | zeta tubulin, putative                                        | 0,06865 | 0,6721 |
| TcCLB.508445.20  | iron superoxide dismutase, putative                           | 0,06863 | 0,6029 |
| TcCLB.507305.30  | casein kinase, putative                                       | 0,0686  | 0,8274 |
| TcCLB.511537.50  | chaperone DNAJ protein, putative                              | 0,06859 | 0,6438 |
| TcCLB.509543.40  | hypothetical protein, conserved                               | 0,06856 | 0,6746 |
| TcCLB.507069.94  | mucin-associated surface protein (MASP), putative             | 0,06845 | 0,8829 |
| TcCLB.508401.50  | hypothetical protein, conserved (pseudogene)                  | 0,06837 | 0,6483 |
| TcCLB.510943.90  | hypothetical protein, conserved                               | 0,06834 | 0,7982 |
| TcCLB.507709.40  | hypothetical protein, conserved                               | 0,06826 | 0,7112 |
| TcCLB.511033.20  | hypothetical protein                                          | 0,06825 | 0,6542 |
| TcCLB.420369.40  | hypothetical protein, conserved                               | 0,06825 | 0,7009 |
| TcCLB.505051.20  | Checkpoint protein HUS1, putative (hus1)                      | 0,06823 | 0,665  |
| TcCLB.504159.40  | aquaporin-like protein, putative                              | 0,06817 | 0,6969 |
| TcCLB.510305.60  | hypothetical protein, conserved                               | 0,06806 | 0,5438 |
| TcCLB.506999.150 | vesicle-associated membrane protein, putative                 | 0,06793 | 0,6178 |
| TcCLB.509213.170 | transcription activator, putative                             | 0,06787 | 0,507  |
| TcCLB.507053.80  | hypothetical protein, conserved                               | 0,06786 | 0,633  |
| TcCLB.508547.40  | hypothetical protein, conserved                               | 0,06772 | 0,7561 |
| TcCLB.504035.100 | hypothetical protein, conserved                               | 0,06757 | 0,605  |
| TcCLB.508637.40  | hypothetical protein, conserved                               | 0,06743 | 0,7725 |
| TcCLB.507601.120 | hypothetical protein, conserved                               | 0,06742 | 0,7556 |

|                  |                                                             |         |        |
|------------------|-------------------------------------------------------------|---------|--------|
| TcCLB.506587.60  | target SNARE, putative                                      | 0,06738 | 0,6925 |
| TcCLB.507519.154 | hypothetical protein, conserved                             | 0,06738 | 0,7126 |
| TcCLB.507041.40  | hypothetical protein, conserved                             | 0,06731 | 0,5602 |
| TcCLB.506733.90  | hypothetical protein, conserved                             | 0,0673  | 0,627  |
| TcCLB.508245.60  | mucin TcMUCII, putative                                     | 0,06717 | 0,9185 |
| TcCLB.507993.70  | hypothetical protein, conserved                             | 0,06713 | 0,5816 |
| TcCLB.505267.60  | trans-sialidase (pseudogene), putative                      | 0,06712 | 0,5936 |
| TcCLB.503529.30  | hypothetical protein, conserved                             | 0,06706 | 0,7241 |
| TcCLB.506753.90  | hypothetical protein, conserved                             | 0,06704 | 0,5254 |
| TcCLB.508879.100 | hypothetical protein, conserved                             | 0,06704 | 0,5278 |
| TcCLB.503395.50  | 40S ribosomal protein S12, putative                         | 0,06697 | 0,5052 |
| TcCLB.507771.120 | trans-sialidase (pseudogene), putative                      | 0,06679 | 0,7881 |
| TcCLB.508465.60  | hypothetical protein, conserved                             | 0,06674 | 0,6219 |
| TcCLB.503939.70  | hypothetical protein                                        | 0,0667  | 0,5081 |
| TcCLB.505025.20  | surface protease GP63 (pseudogene), putative                | 0,06658 | 0,9129 |
| TcCLB.506163.80  | katanin, putative                                           | 0,06654 | 0,6842 |
| TcCLB.510515.40  | hypothetical protein, conserved                             | 0,06653 | 0,8382 |
| TcCLB.510969.4   | hypothetical protein                                        | 0,06636 | 0,8619 |
| TcCLB.503699.11  | mucin-associated surface protein (MASP, pseudogene), pu     | 0,0663  | 0,9393 |
| TcCLB.504169.10  | dispersed gene family protein 1 (DGF-1), putative           | 0,06625 | 0,7834 |
| TcCLB.511837.50  | DNA repair protein, putative                                | 0,06613 | 0,7232 |
| TcCLB.503971.10  | hypothetical protein, conserved                             | 0,06609 | 0,5081 |
| TcCLB.506661.130 | ion transport protein, putative                             | 0,06609 | 0,6807 |
| TcCLB.503843.30  | hypothetical protein, conserved                             | 0,06592 | 0,6398 |
| TcCLB.507103.29  | hypothetical protein, conserved (fragment)                  | 0,0659  | 0,7392 |
| TcCLB.506247.280 | hypothetical protein, conserved                             | 0,06588 | 0,6693 |
| TcCLB.509089.9   | dispersed gene family protein 1 (DGF-1), putative           | 0,06585 | 0,7844 |
| TcCLB.506579.90  | hypothetical protein                                        | 0,0658  | 0,582  |
| TcCLB.511349.100 | trans-sialidase, Group II, putative                         | 0,06559 | 0,8137 |
| TcCLB.508139.160 | expression site-associated gene (ESAG-like) protein, putati | 0,06558 | 0,8357 |
| TcCLB.506925.350 | hypothetical protein, conserved                             | 0,06556 | 0,5857 |
| TcCLB.508781.20  | ATP synthase, putative                                      | 0,06554 | 0,5985 |
| TcCLB.507747.170 | mucin-associated surface protein (MASP), putative           | 0,06551 | 0,8251 |
| TcCLB.436497.10  | hypothetical protein                                        | 0,0654  | 0,6642 |
| TcCLB.510143.60  | hypothetical protein, conserved                             | 0,06534 | 0,7386 |
| TcCLB.511603.356 | syntaxin binding protein (pseudogene), putative             | 0,06534 | 0,9203 |
| TcCLB.503903.10  | hypothetical protein                                        | 0,065   | 0,7697 |
| TcCLB.508693.70  | hypothetical protein, conserved                             | 0,06491 | 0,6998 |
| TcCLB.510407.9   | protein kinase, putative                                    | 0,06483 | 0,8507 |
| TcCLB.510475.90  | mucin TcMUCII, putative                                     | 0,06483 | 0,9071 |
| TcCLB.422189.10  | nucleoside phosphatase, putative                            | 0,0647  | 0,7134 |
| TcCLB.507677.39  | 40S ribosomal protein S3, putative                          | 0,06457 | 0,4214 |
| TcCLB.510145.59  | exonuclease, putative                                       | 0,06456 | 0,7173 |
| TcCLB.508243.10  | mucin-associated surface protein (MASP), putative           | 0,06444 | 0,8674 |
| TcCLB.504431.80  | hypothetical protein                                        | 0,06416 | 0,6807 |

|                  |                                                           |         |        |
|------------------|-----------------------------------------------------------|---------|--------|
| TcCLB.510121.100 | hypothetical protein                                      | 0,06409 | 0,8341 |
| TcCLB.510063.39  | DNA repair protein, putative                              | 0,06403 | 0,6438 |
| TcCLB.506577.54  | 60S ribosomal protein L6, putative                        | 0,06392 | 0,5703 |
| TcCLB.506459.250 | hypothetical protein, conserved                           | 0,06392 | 0,7356 |
| TcCLB.506211.180 | mitogen-activated protein kinase 9, putative (MPK9)       | 0,06391 | 0,6443 |
| TcCLB.508837.70  | trans-sialidase, Group II, putative                       | 0,0639  | 0,7405 |
| TcCLB.507873.50  | hypothetical protein, conserved                           | 0,06385 | 0,7842 |
| TcCLB.511021.60  | hypothetical protein, conserved                           | 0,06383 | 0,7006 |
| TcCLB.510665.10  | hypothetical protein, conserved                           | 0,06364 | 0,6521 |
| TcCLB.509505.30  | 10 kDa heat shock protein, putative                       | 0,06362 | 0,796  |
| TcCLB.506945.290 | ribosomal protein L15, putative                           | 0,06354 | 0,5474 |
| TcCLB.510761.80  | surface protease GP63, putative                           | 0,06352 | 0,8514 |
| TcCLB.509797.40  | isoleucyl-tRNA synthetase, putative                       | 0,06349 | 0,5211 |
| TcCLB.507827.10  | dispersed gene family protein 1 (DGF-1), putative         | 0,06346 | 0,799  |
| TcCLB.506425.140 | hypothetical protein, conserved                           | 0,0634  | 0,703  |
| TcCLB.507015.59  | expression site-associated gene (ESAG-like, pseudogene),  | 0,06338 | 0,7936 |
| TcCLB.506525.80  | N-myristoyl transferase, putative                         | 0,0633  | 0,691  |
| TcCLB.509073.40  | outer dynein arm docking complex protein (DC2)            | 0,06329 | 0,6398 |
| TcCLB.507521.50  | proteasome beta 6 subunit, putative                       | 0,06319 | 0,6474 |
| TcCLB.510149.40  | hypothetical protein, conserved                           | 0,06312 | 0,7224 |
| TcCLB.507467.100 | hypothetical protein                                      | 0,06308 | 0,6622 |
| TcCLB.510613.10  | hypothetical protein, conserved                           | 0,06308 | 0,7268 |
| TcCLB.510667.80  | hypothetical protein, conserved                           | 0,06304 | 0,7612 |
| TcCLB.504115.50  | retrotransposon hot spot protein (RHS, pseudogene), putat | 0,06292 | 0,7974 |
| TcCLB.509151.20  | hypothetical protein                                      | 0,06289 | 0,7173 |
| TcCLB.507993.260 | hypothetical protein, conserved                           | 0,06288 | 0,6296 |
| TcCLB.503601.20  | hypothetical protein                                      | 0,0628  | 0,9081 |
| TcCLB.509017.9   | hypothetical protein, conserved (fragment)                | 0,06262 | 0,7919 |
| TcCLB.511495.11  | hypothetical protein, conserved (fragment)                | 0,06255 | 0,8385 |
| TcCLB.411427.30  | hypothetical protein, conserved                           | 0,06242 | 0,6256 |
| TcCLB.504105.94  | ribosomal protein S25, putative                           | 0,06233 | 0,4925 |
| TcCLB.503877.19  | hypothetical protein, conserved                           | 0,06225 | 0,8114 |
| TcCLB.511903.220 | hypothetical protein, conserved                           | 0,0621  | 0,6157 |
| TcCLB.505997.160 | retrotransposon hot spot protein (RHS, pseudogene), putat | 0,06208 | 0,7839 |
| TcCLB.503981.60  | hypothetical protein, conserved                           | 0,06165 | 0,7023 |
| TcCLB.503465.30  | Iron-sulfur assembly protein 2, putative (Isa2)           | 0,06165 | 0,848  |
| TcCLB.510275.330 | mucin TcMUCII, putative                                   | 0,06162 | 0,9159 |
| TcCLB.508173.240 | hypothetical protein, conserved                           | 0,06143 | 0,744  |
| TcCLB.507825.20  | RNA helicase, putative                                    | 0,06127 | 0,5408 |
| TcCLB.511603.30  | mucin-associated surface protein (MASP), putative         | 0,06126 | 0,9139 |
| TcCLB.511885.50  | retrotransposon hot spot protein (RHS, pseudogene), putat | 0,06125 | 0,6962 |
| TcCLB.503609.32  | elongation factor 1-gamma (EF-1-gamma, pseudogene), p     | 0,06121 | 0,9324 |
| TcCLB.508277.390 | hypothetical protein, conserved                           | 0,06116 | 0,608  |
| TcCLB.509205.50  | hypothetical protein, conserved                           | 0,06116 | 0,7252 |
| TcCLB.507033.29  | extracellular receptor, putative (fragment)               | 0,06112 | 0,7333 |

|                  |                                                                  |         |        |
|------------------|------------------------------------------------------------------|---------|--------|
| TcCLB.431849.20  | hypothetical protein, conserved (fragment)                       | 0,0611  | 0,84   |
| TcCLB.511299.79  | oxidoreductase, putative (fragment)                              | 0,06082 | 0,7629 |
| TcCLB.510085.60  | mucin-associated surface protein (MASP), putative                | 0,06067 | 0,8529 |
| TcCLB.510295.50  | protein kinase, putative                                         | 0,06065 | 0,7268 |
| TcCLB.507517.50  | hypothetical protein                                             | 0,06065 | 0,7493 |
| TcCLB.507739.100 | hypothetical protein                                             | 0,0606  | 0,7464 |
| TcCLB.506729.20  | hypothetical protein, conserved                                  | 0,06057 | 0,7998 |
| TcCLB.506289.170 | surface protease GP63, putative                                  | 0,0605  | 0,8614 |
| TcCLB.503819.10  | hypothetical protein, conserved                                  | 0,06049 | 0,7029 |
| TcCLB.509353.60  | calmodulin, putative                                             | 0,0604  | 0,5861 |
| TcCLB.510469.30  | trans-sialidase (pseudogene), putative                           | 0,06031 | 0,9122 |
| TcCLB.506755.260 | mitochondrial RNA-binding protein 2, putative                    | 0,06025 | 0,6679 |
| TcCLB.505007.39  | hypothetical protein, conserved                                  | 0,06023 | 0,7922 |
| TcCLB.508507.30  | calcium uniporter protein, mitochondrial, putative               | 0,06005 | 0,7747 |
| TcCLB.506857.110 | hypothetical protein, conserved                                  | 0,05999 | 0,7455 |
| TcCLB.504057.130 | hypothetical protein, conserved                                  | 0,05994 | 0,5659 |
| TcCLB.511367.340 | mitochondrial processing peptidase alpha subunit, putative       | 0,05987 | 0,5478 |
| TcCLB.510165.50  | hypothetical protein, conserved                                  | 0,05984 | 0,7932 |
| TcCLB.506755.40  | hypothetical protein, conserved                                  | 0,05983 | 0,7869 |
| TcCLB.509203.30  | hd phosphohydrolase family protein                               | 0,05983 | 0,831  |
| TcCLB.507809.74  | signal peptidase type I, putative                                | 0,05971 | 0,7277 |
| TcCLB.507007.20  | hypothetical protein, conserved                                  | 0,05962 | 0,644  |
| TcCLB.508347.110 | hypothetical protein, conserved                                  | 0,05934 | 0,794  |
| TcCLB.506679.100 | 40S ribosomal protein S18, putative                              | 0,05926 | 0,5162 |
| TcCLB.511295.20  | hypothetical protein, conserved                                  | 0,05906 | 0,8386 |
| TcCLB.506133.125 | hypothetical protein, conserved (pseudogene)                     | 0,05905 | 0,9473 |
| TcCLB.508641.170 | protein kinase, putative                                         | 0,05885 | 0,782  |
| TcCLB.508569.90  | hypothetical protein, conserved                                  | 0,05872 | 0,7112 |
| TcCLB.508661.20  | ubiquitin/ribosomal protein S27a, putative                       | 0,05869 | 0,5581 |
| TcCLB.511043.45  | trans-sialidase (pseudogene), putative                           | 0,05867 | 0,7397 |
| TcCLB.506697.50  | peptidyl-prolyl cis-trans isomerase NIMA-interacting 4, putative | 0,05864 | 0,8048 |
| TcCLB.506947.90  | adenylate kinase, putative                                       | 0,05862 | 0,7602 |
| TcCLB.510199.30  | mucin-associated surface protein (MASP), putative                | 0,05858 | 0,8892 |
| TcCLB.509767.180 | exosome component CSL4, putative (CSL4)                          | 0,05854 | 0,812  |
| TcCLB.507255.50  | UDP-Gal or UDP-GlcNAc-dependent glycosyltransferase, putative    | 0,05821 | 0,8666 |
| TcCLB.509613.10  | hypothetical protein, conserved                                  | 0,0582  | 0,7687 |
| TcCLB.503489.10  | metallo-peptidase, Clan MC, Family M14, putative                 | 0,05813 | 0,6606 |
| TcCLB.510427.5   | hypothetical protein, conserved                                  | 0,05806 | 0,8445 |
| TcCLB.509611.160 | proteasome regulatory non-ATPase subunit, putative               | 0,05784 | 0,6716 |
| TcCLB.511883.49  | hypothetical protein, conserved (fragment)                       | 0,0578  | 0,745  |
| TcCLB.506499.170 | trans-sialidase, Group V, putative                               | 0,0578  | 0,8896 |
| TcCLB.508851.110 | hypothetical protein, conserved                                  | 0,05776 | 0,8345 |
| TcCLB.508625.50  | 6-phosphofructo-2-kinase/fructose-2,6-bisphosphatase, putative   | 0,05753 | 0,7697 |
| TcCLB.511383.70  | hypothetical protein, conserved                                  | 0,05753 | 0,7922 |
| TcCLB.508469.50  | hypothetical protein, conserved (pseudogene)                     | 0,05744 | 0,7268 |

|                   |                                                              |         |        |
|-------------------|--------------------------------------------------------------|---------|--------|
| TcCLB.506017.20   | hypothetical protein, conserved (pseudogene)                 | 0,05743 | 0,7055 |
| TcCLB.511507.120  | hypothetical protein, conserved                              | 0,05732 | 0,7561 |
| TcCLB.506471.90   | dispersed gene family protein 1 (DGF-1, pseudogene), puta    | 0,0573  | 0,8065 |
| TcCLB.511237.120  | hypothetical protein                                         | 0,05728 | 0,8729 |
| TcCLB.511711.90   | cop-coated vesicle membrane protein p24 precursor, putat     | 0,05715 | 0,6717 |
| TcCLB.509229.120  | hypothetical protein, conserved                              | 0,057   | 0,7708 |
| TcCLB.507711.40   | RNA-binding protein, putative                                | 0,05694 | 0,7309 |
| TcCLB.510747.80   | Double RNA binding domain protein 9 (DRBD9)                  | 0,05692 | 0,7123 |
| TcCLB.508227.51   | surface protease GP63 (pseudogene), putative                 | 0,05687 | 0,9383 |
| TcCLB.509965.300  | hypothetical protein, conserved                              | 0,05673 | 0,835  |
| TcCLB.509897.70   | trans-sialidase, Group V, putative                           | 0,05667 | 0,8376 |
| TcCLB.511799.9    | hypothetical protein, conserved (fragment)                   | 0,05655 | 0,6637 |
| TcCLB.503573.9    | ATP-binding cassette transporter ABCA1, putative (ABCA1)     | 0,05654 | 0,8057 |
| TcCLB.506123.10   | major vault protein, putative                                | 0,05652 | 0,7408 |
| TcCLB.510911.50   | glycine dehydrogenase [decarboxylating], putative            | 0,05651 | 0,8677 |
| TcCLB.509169.39   | protein kinase, putative                                     | 0,05649 | 0,8419 |
| TcCLB.509505.50   | 10 kDa heat shock protein, putative                          | 0,05639 | 0,7166 |
| TcCLB.506279.220  | mucin-associated surface protein (MASP, pseudogene), pu      | 0,05622 | 0,8544 |
| TcCLB.508957.30   | hypothetical protein, conserved                              | 0,05612 | 0,6622 |
| TcCLB.510531.90   | hypothetical protein, conserved (pseudogene)                 | 0,0561  | 0,7454 |
| TcCLB.507021.50   | kinesin, putative                                            | 0,05604 | 0,6318 |
| TcCLB.510579.60   | heat shock protein, putative                                 | 0,05603 | 0,7282 |
| TcCLB.503823.20   | hypothetical protein, conserved                              | 0,05601 | 0,8076 |
| TcCLB.509607.40   | hypothetical protein                                         | 0,05593 | 0,7313 |
| TcCLB.511383.30   | U1 small nuclear ribonucleoprotein, putative                 | 0,05592 | 0,7844 |
| TcCLB.511179.110  | hypothetical protein, conserved                              | 0,05579 | 0,7062 |
| TcCLB.510483.320  | retrotransposon hot spot protein (RHS, pseudogene), putat    | 0,05578 | 0,8266 |
| TcCLB.508153.1070 | hypothetical protein, conserved                              | 0,05569 | 0,6959 |
| TcCLB.508717.53   | hypothetical protein, conserved                              | 0,0555  | 0,6685 |
| TcCLB.508387.30   | hypothetical protein, conserved                              | 0,05548 | 0,7156 |
| TcCLB.508553.10   | dispersed gene family protein 1 (DGF-1, pseudogene), puta    | 0,05541 | 0,859  |
| TcCLB.503425.5    | mitochondrial carrier protein, putative                      | 0,0554  | 0,883  |
| TcCLB.510429.24   | hypothetical protein, conserved                              | 0,05527 | 0,8296 |
| TcCLB.508897.50   | hypothetical protein, conserved                              | 0,05525 | 0,6671 |
| TcCLB.507993.250  | hypothetical protein, conserved                              | 0,05516 | 0,7166 |
| TcCLB.506629.30   | guide RNA-binding protein of 21 kDa (gBP21)                  | 0,05504 | 0,6637 |
| TcCLB.404001.20   | hypothetical protein, conserved                              | 0,05482 | 0,6122 |
| TcCLB.510387.15   | syntaxin binding protein (pseudogene), putative              | 0,05482 | 0,9139 |
| TcCLB.504033.53   | UDP-Gal or UDP-GlcNAc-dependent glycosyltransferase (p       | 0,05474 | 0,9417 |
| TcCLB.507491.50   | hypothetical protein, conserved                              | 0,05458 | 0,7604 |
| TcCLB.507601.50   | hypothetical protein                                         | 0,05457 | 0,7561 |
| TcCLB.506695.4    | Putative intraflagellar transport protein C3 (fragment) (PIF | 0,05456 | 0,7747 |
| TcCLB.511217.209  | hypothetical protein, conserved (fragment)                   | 0,05445 | 0,8239 |
| TcCLB.510565.120  | hypothetical protein, conserved                              | 0,05441 | 0,773  |
| TcCLB.503779.10   | hypothetical protein, conserved                              | 0,05439 | 0,8253 |

|                   |                                                                       |         |        |
|-------------------|-----------------------------------------------------------------------|---------|--------|
| TcCLB.510371.10   | mucin-associated surface protein (MASP), putative                     | 0,05426 | 0,8994 |
| TcCLB.510317.40   | hypothetical protein, conserved                                       | 0,05425 | 0,7186 |
| TcCLB.506967.100  | mucin-associated surface protein (MASP), putative                     | 0,05423 | 0,9171 |
| TcCLB.510073.10   | cysteine peptidase (N-terminal), putative                             | 0,05418 | 0,8613 |
| TcCLB.504047.10   | hypothetical protein, conserved                                       | 0,05407 | 0,8467 |
| TcCLB.511309.20   | hydrolase-like protein, putative                                      | 0,054   | 0,7985 |
| TcCLB.508909.330  | protein kinase, putative                                              | 0,05399 | 0,7015 |
| TcCLB.511277.600  | UDP-galactopyranose mutase (GLF)                                      | 0,05378 | 0,6635 |
| TcCLB.506435.270  | dihydroxyacetone phosphate acyltransferase, putative (DA <sup>-</sup> | 0,05375 | 0,6574 |
| TcCLB.507059.50   | trans-sialidase, Group V, putative                                    | 0,05367 | 0,8475 |
| TcCLB.509245.20   | hypothetical protein, conserved                                       | 0,05361 | 0,8617 |
| TcCLB.503917.40   | hypothetical protein, conserved                                       | 0,05359 | 0,7312 |
| TcCLB.509157.260  | hypothetical protein                                                  | 0,05354 | 0,7725 |
| TcCLB.506163.35   | hypothetical protein, conserved                                       | 0,05346 | 0,8252 |
| TcCLB.508257.180  | hypothetical protein, conserved                                       | 0,05328 | 0,7227 |
| TcCLB.506943.130  | hypothetical protein, conserved                                       | 0,05325 | 0,7764 |
| TcCLB.511353.30   | hypothetical protein, conserved                                       | 0,05325 | 0,7855 |
| TcCLB.511471.90   | glycine dehydrogenase [decarboxylating] (pseudogene), pu              | 0,0532  | 0,8605 |
| TcCLB.508817.20   | hypothetical protein                                                  | 0,05317 | 0,703  |
| TcCLB.508409.338  | DNA repair protein, putative                                          | 0,05307 | 0,802  |
| TcCLB.508921.20   | hypothetical protein, conserved                                       | 0,05302 | 0,8151 |
| TcCLB.505939.70   | hypothetical protein, conserved                                       | 0,05271 | 0,7251 |
| TcCLB.509733.100  | translation elongation factor 1-beta, putative                        | 0,05257 | 0,5098 |
| TcCLB.506783.30   | elongation factor 1-gamma (EF-1-gamma), putative                      | 0,05252 | 0,9119 |
| TcCLB.504131.190  | mitochondrial carrier protein, putative                               | 0,05248 | 0,7421 |
| TcCLB.507491.110  | hypothetical protein                                                  | 0,05246 | 0,6884 |
| TcCLB.416883.9    | hypothetical protein, conserved (fragment)                            | 0,05242 | 0,7972 |
| TcCLB.511163.40   | cell cycle sequence binding phosphoprotein (RBP45), putat             | 0,05241 | 0,7121 |
| TcCLB.507519.50   | hypothetical protein, conserved                                       | 0,05241 | 0,8032 |
| TcCLB.507737.10   | hypothetical protein, conserved                                       | 0,05241 | 0,8849 |
| TcCLB.510301.50   | hypothetical protein, conserved                                       | 0,0524  | 0,7928 |
| TcCLB.507167.31   | N-acetyltransferase complex ARD1 subunit (pseudogene),                | 0,05231 | 0,9348 |
| TcCLB.509643.110  | hypothetical protein, conserved                                       | 0,05228 | 0,7355 |
| TcCLB.511603.380  | mucin-associated surface protein (MASP), putative                     | 0,05223 | 0,9179 |
| TcCLB.505037.40   | hypothetical protein, conserved                                       | 0,0522  | 0,7506 |
| TcCLB.506457.60   | 2-aminoethylphosphonate:pyruvateaminotransferase- like                | 0,0522  | 0,7661 |
| TcCLB.511911.140  | hypothetical protein, conserved                                       | 0,05198 | 0,8    |
| TcCLB.509719.28   | hypothetical protein, conserved                                       | 0,05195 | 0,8707 |
| TcCLB.508221.1050 | trans-sialidase, putative                                             | 0,05193 | 0,916  |
| TcCLB.509789.30   | rab-like GTPase activating protein, putative                          | 0,05183 | 0,7845 |
| TcCLB.509669.100  | hypothetical protein, conserved                                       | 0,05182 | 0,7522 |
| TcCLB.510289.6    | nucleolar RNA-binding protein, putative                               | 0,05173 | 0,7844 |
| TcCLB.507907.55   | ATP-dependent DEAD/H RNA helicase (pseudogene), putat                 | 0,05173 | 0,8416 |
| TcCLB.508271.10   | phenylalanyl-tRNA synthetase, putative                                | 0,05165 | 0,6234 |
| TcCLB.510143.50   | hypothetical protein, conserved                                       | 0,05163 | 0,7661 |

|                  |                                                           |         |        |
|------------------|-----------------------------------------------------------|---------|--------|
| TcCLB.509671.80  | 60S ribosomal protein L5, putative                        | 0,05162 | 0,5404 |
| TcCLB.508759.10  | mucin-associated surface protein (MASP), putative         | 0,0516  | 0,945  |
| TcCLB.507105.120 | hypothetical protein, conserved (pseudogene)              | 0,0515  | 0,7641 |
| TcCLB.506435.430 | hypothetical protein, conserved                           | 0,05141 | 0,6979 |
| TcCLB.510283.50  | hypothetical protein, conserved                           | 0,05138 | 0,824  |
| TcCLB.507519.210 | glycine dehydrogenase [decarboxylating] (pseudogene), pu  | 0,05127 | 0,7834 |
| TcCLB.508385.30  | CYC2-like cyclin, putative                                | 0,05094 | 0,6725 |
| TcCLB.510175.30  | trans-sialidase (pseudogene), putative                    | 0,0506  | 0,8434 |
| TcCLB.510735.100 | hypothetical protein, conserved                           | 0,05057 | 0,793  |
| TcCLB.506575.30  | hypothetical protein, conserved (pseudogene)              | 0,05033 | 0,6945 |
| TcCLB.510363.60  | trans-sialidase (pseudogene), putative                    | 0,05031 | 0,9061 |
| TcCLB.508417.10  | hypothetical protein, conserved                           | 0,0502  | 0,6884 |
| TcCLB.460747.9   | hypothetical protein, conserved (fragment)                | 0,05019 | 0,7229 |
| TcCLB.508205.10  | hypothetical protein, conserved                           | 0,05019 | 0,8111 |
| TcCLB.507623.129 | vacuolar type h ATPase subunit, putative                  | 0,05018 | 0,7823 |
| TcCLB.507515.50  | hypothetical protein                                      | 0,05018 | 0,787  |
| TcCLB.507071.140 | mucin-associated surface protein (MASP), putative         | 0,05017 | 0,9312 |
| TcCLB.510497.190 | hypothetical protein                                      | 0,05    | 0,9423 |
| TcCLB.509579.40  | hypothetical protein, conserved (pseudogene)              | 0,04998 | 0,8513 |
| TcCLB.506945.350 | serine/threonine protein kinase, putative                 | 0,0498  | 0,5835 |
| TcCLB.509871.39  | hypothetical protein, conserved (pseudogene)              | 0,04968 | 0,7168 |
| TcCLB.507669.200 | hypothetical protein, conserved                           | 0,04967 | 0,7797 |
| TcCLB.504427.260 | kinesin, putative                                         | 0,04954 | 0,6787 |
| TcCLB.510719.170 | hypothetical protein, conserved                           | 0,04947 | 0,8285 |
| TcCLB.511139.20  | 40S ribosomal protein S11, putative                       | 0,04944 | 0,5611 |
| TcCLB.504015.21  | elongation factor 1-gamma (EF-1-gamma, pseudogene), p     | 0,04943 | 0,9297 |
| TcCLB.507467.30  | hypothetical protein, conserved                           | 0,04941 | 0,8458 |
| TcCLB.511181.100 | 60S ribosomal protein L8, putative                        | 0,0494  | 0,5738 |
| TcCLB.505419.20  | retrotransposon hot spot protein (RHS, pseudogene), putat | 0,04939 | 0,7771 |
| TcCLB.506625.60  | inositol 5-phosphatase 1, putative                        | 0,04936 | 0,6121 |
| TcCLB.509683.40  | hypothetical protein, conserved                           | 0,04928 | 0,7629 |
| TcCLB.511655.20  | hypothetical protein, conserved                           | 0,04928 | 0,7927 |
| TcCLB.506501.390 | mucin TcMUCII, putative                                   | 0,04928 | 0,9495 |
| TcCLB.506297.270 | 60S ribosomal protein L28, putative                       | 0,04915 | 0,5901 |
| TcCLB.504147.20  | 60S ribosomal protein L18, putative                       | 0,04904 | 0,5846 |
| TcCLB.507713.20  | hypothetical protein, conserved                           | 0,04904 | 0,7829 |
| TcCLB.509205.20  | hypothetical protein, conserved                           | 0,04903 | 0,81   |
| TcCLB.508797.29  | hypothetical protein, conserved                           | 0,04883 | 0,6508 |
| TcCLB.485845.9   | dispersed gene family protein 1 (DGF-1), putative (fragme | 0,04874 | 0,9471 |
| TcCLB.508879.50  | hypothetical protein                                      | 0,0487  | 0,7618 |
| TcCLB.509337.19  | hypothetical protein, conserved                           | 0,04867 | 0,7949 |
| TcCLB.508747.5   | mucin-associated surface protein (MASP), putative         | 0,0486  | 0,9335 |
| TcCLB.506905.20  | hypothetical protein, conserved                           | 0,04855 | 0,7588 |
| TcCLB.505333.20  | ATP-dependent DEAD/H RNA helicase (pseudogene), putat     | 0,04828 | 0,9294 |
| TcCLB.503421.20  | hypothetical protein, conserved (pseudogene)              | 0,0482  | 0,8441 |

|                  |                                                        |         |        |
|------------------|--------------------------------------------------------|---------|--------|
| TcCLB.508837.154 | hypothetical protein, conserved                        | 0,04815 | 0,8389 |
| TcCLB.507963.70  | hypothetical protein, conserved                        | 0,04811 | 0,7347 |
| TcCLB.509497.20  | hypothetical protein, conserved                        | 0,04791 | 0,7583 |
| TcCLB.511045.10  | hypothetical protein, conserved                        | 0,04788 | 0,7661 |
| TcCLB.503579.60  | hypothetical protein                                   | 0,04773 | 0,7796 |
| TcCLB.508303.50  | hypothetical protein, conserved                        | 0,04773 | 0,7977 |
| TcCLB.509471.86  | histone H3, putative                                   | 0,04754 | 0,594  |
| TcCLB.508303.20  | hypothetical protein                                   | 0,04751 | 0,7919 |
| TcCLB.509287.220 | hypothetical protein, conserved                        | 0,0475  | 0,7496 |
| TcCLB.510329.330 | hypothetical protein, conserved                        | 0,04749 | 0,7923 |
| TcCLB.510315.14  | hypothetical protein, conserved                        | 0,04749 | 0,8346 |
| TcCLB.506865.30  | hypothetical protein, conserved                        | 0,04744 | 0,7521 |
| TcCLB.509115.41  | elongation factor 1-gamma (EF-1-gamma, pseudogene), p  | 0,04738 | 0,8822 |
| TcCLB.509045.29  | kinesin, putative                                      | 0,04736 | 0,8142 |
| TcCLB.508207.100 | 60S ribosomal protein L7, putative                     | 0,04734 | 0,5766 |
| TcCLB.508727.54  | hypothetical protein, conserved                        | 0,04728 | 0,7863 |
| TcCLB.509671.70  | ribosomal protein L15, putative                        | 0,04725 | 0,6016 |
| TcCLB.503903.20  | hypothetical protein, conserved                        | 0,0471  | 0,8233 |
| TcCLB.503987.70  | ribosome biogenesis protein TSR3, putative (tsr3)      | 0,04708 | 0,8453 |
| TcCLB.504157.100 | hypothetical protein, conserved                        | 0,04697 | 0,7704 |
| TcCLB.508887.10  | hypothetical protein, conserved (pseudogene)           | 0,04685 | 0,9468 |
| TcCLB.506337.200 | hypothetical protein, conserved                        | 0,04663 | 0,6919 |
| TcCLB.506603.40  | trans-sialidase, Group V, putative                     | 0,04661 | 0,89   |
| TcCLB.508779.70  | hypothetical protein, conserved                        | 0,04648 | 0,732  |
| TcCLB.506679.240 | hypothetical protein, conserved                        | 0,0464  | 0,7945 |
| TcCLB.478711.10  | trans-sialidase (pseudogene), putative                 | 0,04637 | 0,7623 |
| TcCLB.504787.70  | mucin-associated surface protein (MASP), putative      | 0,04617 | 0,9022 |
| TcCLB.507699.170 | surface protease GP63 (pseudogene), putative           | 0,04594 | 0,8667 |
| TcCLB.507427.10  | trans-sialidase, Group I, putative                     | 0,04589 | 0,8137 |
| TcCLB.507093.90  | hypothetical protein, conserved                        | 0,04585 | 0,7567 |
| TcCLB.506329.35  | hypothetical protein, conserved (pseudogene)           | 0,04575 | 0,9505 |
| TcCLB.506835.40  | hypothetical protein, conserved                        | 0,04573 | 0,7905 |
| TcCLB.509885.50  | hypothetical protein, conserved                        | 0,04571 | 0,7946 |
| TcCLB.509733.160 | amino acid transporter, putative                       | 0,04566 | 0,7881 |
| TcCLB.508323.100 | I/6 autoantigen, putative                              | 0,04563 | 0,793  |
| TcCLB.511491.130 | dolichyl pyrophosphate phosphatase, putative           | 0,04557 | 0,8482 |
| TcCLB.503919.50  | hypothetical protein, conserved                        | 0,04553 | 0,7562 |
| TcCLB.510489.50  | trans-sialidase, putative                              | 0,0455  | 0,9441 |
| TcCLB.508813.60  | Present in the outer mitochondrial membrane proteome 1 | 0,04549 | 0,6536 |
| TcCLB.509539.50  | small GTP-binding protein, putative                    | 0,04538 | 0,7173 |
| TcCLB.511657.50  | hypothetical protein, conserved                        | 0,04536 | 0,9136 |
| TcCLB.509693.130 | hypothetical protein                                   | 0,04534 | 0,805  |
| TcCLB.510187.400 | serine/threonine protein phosphatase, putative         | 0,04518 | 0,7271 |
| TcCLB.433273.10  | dynein heavy chain, putative (fragment)                | 0,045   | 0,7671 |
| TcCLB.511653.10  | delta-adaptin, putative                                | 0,04498 | 0,7388 |



|                  |                                                           |         |        |
|------------------|-----------------------------------------------------------|---------|--------|
| TcCLB.510187.130 | Bardet-Biedl syndrome 4 protein, putative (BBS4)          | 0,04492 | 0,7587 |
| TcCLB.506967.60  | trans-sialidase, Group VI, putative                       | 0,04489 | 0,9114 |
| TcCLB.506195.280 | hypothetical protein, conserved                           | 0,04485 | 0,6966 |
| TcCLB.506357.180 | hypothetical protein                                      | 0,04484 | 0,7529 |
| TcCLB.508737.40  | hypothetical protein                                      | 0,04479 | 0,7797 |
| TcCLB.510665.40  | DNA-repair protein, putative                              | 0,0446  | 0,7173 |
| TcCLB.511001.110 | hypothetical protein, conserved                           | 0,04456 | 0,8214 |
| TcCLB.511287.10  | hypothetical protein, conserved                           | 0,04454 | 0,79   |
| TcCLB.506667.40  | mucin-associated surface protein (MASP), putative         | 0,04453 | 0,9398 |
| TcCLB.507875.70  | trans-sialidase, Group VII, putative                      | 0,04452 | 0,9168 |
| TcCLB.506163.70  | hypothetical protein, conserved                           | 0,04437 | 0,7614 |
| TcCLB.503487.60  | hypothetical protein, conserved                           | 0,04431 | 0,832  |
| TcCLB.511407.50  | hypothetical protein, conserved                           | 0,04427 | 0,7243 |
| TcCLB.506363.90  | amidohydrolase, putative                                  | 0,0442  | 0,7661 |
| TcCLB.508967.20  | dispersed gene family protein 1 (DGF-1), putative         | 0,04414 | 0,9133 |
| TcCLB.510661.200 | hypothetical protein, conserved                           | 0,04409 | 0,7921 |
| TcCLB.506885.120 | protein kinase, putative                                  | 0,04394 | 0,8137 |
| TcCLB.506613.70  | hypothetical protein                                      | 0,04394 | 0,9249 |
| TcCLB.510219.10  | hypothetical protein, conserved                           | 0,04385 | 0,8238 |
| TcCLB.511311.14  | retrotransposon hot spot protein (RHS, pseudogene), putat | 0,04383 | 0,8056 |
| TcCLB.503847.50  | hypothetical protein, conserved                           | 0,04351 | 0,8433 |
| TcCLB.506457.99  | hypothetical protein, conserved                           | 0,04347 | 0,7602 |
| TcCLB.503709.20  | 60S ribosomal protein L44, putative (fragment)            | 0,04343 | 0,6966 |
| TcCLB.504741.250 | protein kinase, putative                                  | 0,04341 | 0,7454 |
| TcCLB.510877.130 | hypothetical protein, conserved                           | 0,04336 | 0,7224 |
| TcCLB.507837.50  | 40S ribosomal protein S11, putative                       | 0,04324 | 0,9229 |
| TcCLB.510599.50  | hypothetical protein                                      | 0,04323 | 0,7606 |
| TcCLB.508845.5   | retrotransposon hot spot protein (RHS, pseudogene), putat | 0,04321 | 0,941  |
| TcCLB.504741.200 | hypothetical protein, conserved                           | 0,0432  | 0,787  |
| TcCLB.506855.330 | hypothetical protein, conserved                           | 0,04317 | 0,7622 |
| TcCLB.510551.20  | trans-sialidase (pseudogene), putative                    | 0,04298 | 0,9103 |
| TcCLB.507631.15  | hypothetical protein, conserved (pseudogene)              | 0,04281 | 0,8948 |
| TcCLB.504025.19  | hypothetical protein, conserved (fragment)                | 0,04277 | 0,8677 |
| TcCLB.503493.40  | hypothetical protein, conserved                           | 0,04272 | 0,9456 |
| TcCLB.506499.210 | mucin-associated surface protein (MASP), putative         | 0,04267 | 0,8948 |
| TcCLB.511131.89  | hypothetical protein, conserved                           | 0,04266 | 0,8472 |
| TcCLB.504881.40  | hypothetical protein, conserved                           | 0,04263 | 0,7504 |
| TcCLB.506425.30  | hypothetical protein, conserved                           | 0,04255 | 0,7467 |
| TcCLB.506067.34  | mucin-associated surface protein (MASP, pseudogene), pu   | 0,04255 | 0,91   |
| TcCLB.508207.260 | hypothetical protein, conserved                           | 0,04249 | 0,8291 |
| TcCLB.508461.450 | hypothetical protein, conserved                           | 0,04245 | 0,793  |
| TcCLB.506767.400 | mucin-associated surface protein (MASP), putative         | 0,04242 | 0,9499 |
| TcCLB.510383.9   | dispersed gene family protein 1 (DGF-1), putative         | 0,04238 | 0,8906 |
| TcCLB.507159.65  | DNA-directed RNA polymerase subunit, putative             | 0,04227 | 0,8041 |
| TcCLB.509243.60  | ATP-dependent DEAD/H DNA helicase recQ, putative          | 0,04215 | 0,9071 |

|                  |                                                           |         |        |
|------------------|-----------------------------------------------------------|---------|--------|
| TcCLB.511555.20  | hypothetical protein, conserved                           | 0,04209 | 0,7855 |
| TcCLB.511515.20  | AAA ATPase (pseudogene), putative                         | 0,04204 | 0,7662 |
| TcCLB.504047.60  | protein kinase, putative                                  | 0,04201 | 0,7424 |
| TcCLB.504239.290 | mucin-associated surface protein (MASP), putative         | 0,04197 | 0,9249 |
| TcCLB.508355.310 | hypothetical protein, conserved                           | 0,04196 | 0,7576 |
| TcCLB.509921.40  | retrotransposon hot spot protein (RHS, pseudogene), putat | 0,04193 | 0,8321 |
| TcCLB.511761.70  | hypothetical protein, conserved                           | 0,04188 | 0,8178 |
| TcCLB.508541.110 | mucin-associated surface protein (MASP), putative         | 0,04167 | 0,9344 |
| TcCLB.508541.170 | hypothetical protein, conserved                           | 0,04159 | 0,876  |
| TcCLB.509039.40  | hypothetical protein                                      | 0,04156 | 0,837  |
| TcCLB.506367.60  | vacuolar protein sorting protein 16, putative             | 0,04155 | 0,7209 |
| TcCLB.511621.100 | hypothetical protein, conserved                           | 0,04139 | 0,802  |
| TcCLB.510293.20  | cytosolic factor SEC14, putative                          | 0,04138 | 0,8307 |
| TcCLB.509105.94  | hypothetical protein, conserved                           | 0,0412  | 0,8722 |
| TcCLB.511725.180 | dynein, putative                                          | 0,04118 | 0,7619 |
| TcCLB.506843.70  | protein kinase, putative                                  | 0,04118 | 0,9516 |
| TcCLB.508797.10  | tubulin-tyrosine ligase-like protein, putative            | 0,04112 | 0,7685 |
| TcCLB.511017.30  | cyclin dependent kinase-binding protein, putative         | 0,0411  | 0,7418 |
| TcCLB.509767.160 | hypothetical protein, conserved                           | 0,04109 | 0,885  |
| TcCLB.511291.90  | 40S ribosomal protein S13, putative                       | 0,04105 | 0,6776 |
| TcCLB.506501.10  | mucin-associated surface protein (MASP), putative         | 0,04101 | 0,9441 |
| TcCLB.511127.260 | DNA photolyase, putative                                  | 0,04095 | 0,7464 |
| TcCLB.510597.40  | nucleoporin (NUP54/57), putative                          | 0,04087 | 0,8729 |
| TcCLB.506977.130 | ras-related protein Rab21, putative (RAB21)               | 0,0407  | 0,796  |
| TcCLB.511407.60  | small GTP-binding protein Rab11, putative (Rab11)         | 0,04068 | 0,8075 |
| TcCLB.507401.9   | dispersed gene family protein 1 (DGF-1), putative (fragme | 0,04063 | 0,8826 |
| TcCLB.503395.20  | hypothetical protein, conserved                           | 0,04051 | 0,8583 |
| TcCLB.503953.59  | mitochondrial DNA polymerase beta-PAK, putative           | 0,0405  | 0,8373 |
| TcCLB.505995.10  | dispersed gene family protein 1 (DGF-1), putative         | 0,04044 | 0,92   |
| TcCLB.506605.200 | hypothetical protein, conserved                           | 0,04041 | 0,8334 |
| TcCLB.511293.69  | glycosomal malate dehydrogenase, putative                 | 0,04034 | 0,6276 |
| TcCLB.510627.60  | mucin-associated surface protein (MASP), putative         | 0,04029 | 0,9542 |
| TcCLB.508135.10  | hypothetical protein, conserved                           | 0,04023 | 0,8341 |
| TcCLB.509453.30  | GCN5-like protein, putative                               | 0,04015 | 0,8841 |
| TcCLB.508361.30  | mucin TcMUCII, putative                                   | 0,04009 | 0,9377 |
| TcCLB.503763.10  | retrotransposon hot spot (RHS) protein, putative          | 0,04002 | 0,8934 |
| TcCLB.511303.110 | hypothetical protein, conserved                           | 0,03998 | 0,7984 |
| TcCLB.509053.100 | protein kinase, putative                                  | 0,03988 | 0,802  |
| TcCLB.503643.39  | hypothetical protein, conserved                           | 0,03971 | 0,864  |
| TcCLB.504103.90  | hypothetical protein, conserved                           | 0,03967 | 0,8362 |
| TcCLB.506613.30  | hypothetical protein                                      | 0,03955 | 0,9471 |
| TcCLB.506475.116 | glutaredoxin, putative                                    | 0,03949 | 0,8617 |
| TcCLB.419417.4   | ADP-ribosylation factor, putative (fragment)              | 0,03943 | 0,7998 |
| TcCLB.421321.9   | exportin-T, putative (fragment)                           | 0,03941 | 0,8161 |
| TcCLB.507023.124 | hypothetical protein, conserved                           | 0,03939 | 0,9055 |

|                  |                                                               |         |        |
|------------------|---------------------------------------------------------------|---------|--------|
| TcCLB.438147.18  | hypothetical protein, conserved                               | 0,03924 | 0,8837 |
| TcCLB.508657.20  | sec1-like protein (pseudogene), putative                      | 0,0392  | 0,8094 |
| TcCLB.506201.140 | hypothetical protein, conserved                               | 0,03903 | 0,7515 |
| TcCLB.506945.310 | hypothetical protein, conserved                               | 0,039   | 0,8249 |
| TcCLB.509649.50  | hypothetical protein, conserved                               | 0,03896 | 0,7511 |
| TcCLB.510197.20  | mucin-associated surface protein (MASP), putative             | 0,03877 | 0,8924 |
| TcCLB.507091.60  | trans-sialidase, Group V, putative                            | 0,03874 | 0,8942 |
| TcCLB.507669.110 | hypothetical protein, conserved                               | 0,03871 | 0,7542 |
| TcCLB.506817.10  | hypothetical protein, conserved                               | 0,03868 | 0,6981 |
| TcCLB.510901.170 | hypothetical protein, conserved                               | 0,03866 | 0,7415 |
| TcCLB.511751.40  | DNA-J protein, putative                                       | 0,03861 | 0,8578 |
| TcCLB.508661.30  | DnaJ chaperone protein, putative                              | 0,03821 | 0,7592 |
| TcCLB.510407.80  | hypothetical protein, conserved                               | 0,03817 | 0,7666 |
| TcCLB.506841.8   | hypothetical protein, conserved                               | 0,03813 | 0,7767 |
| TcCLB.507003.60  | hypothetical protein, conserved                               | 0,03787 | 0,7919 |
| TcCLB.506301.60  | hypothetical protein                                          | 0,03781 | 0,7565 |
| TcCLB.509897.155 | trans-sialidase (pseudogene), putative                        | 0,03778 | 0,8734 |
| TcCLB.506809.10  | trans-sialidase (pseudogene), putative                        | 0,03775 | 0,8941 |
| TcCLB.506485.109 | cyclic nucleotide-binding domain containing protein, putative | 0,03774 | 0,8012 |
| TcCLB.510207.30  | trans-sialidase, Group V, putative                            | 0,03768 | 0,9339 |
| TcCLB.507011.120 | acyl transferase-like protein, putative                       | 0,03767 | 0,8105 |
| TcCLB.506577.5   | hypothetical protein                                          | 0,03765 | 0,8374 |
| TcCLB.504021.149 | hypothetical protein, conserved (fragment)                    | 0,03765 | 0,8552 |
| TcCLB.508577.10  | trans-sialidase (pseudogene), putative                        | 0,0376  | 0,9168 |
| TcCLB.506241.50  | hypothetical protein, conserved                               | 0,03758 | 0,8226 |
| TcCLB.507065.60  | mucin-associated surface protein (MASP), putative             | 0,0375  | 0,9128 |
| TcCLB.402449.10  | trans-sialidase (pseudogene), putative                        | 0,03745 | 0,8961 |
| TcCLB.511895.50  | hypothetical protein, conserved                               | 0,03744 | 0,7887 |
| TcCLB.511661.40  | signal peptidase type I, putative                             | 0,03735 | 0,8654 |
| TcCLB.509895.110 | hypothetical protein, conserved                               | 0,03733 | 0,9279 |
| TcCLB.508821.50  | vacuolar type h ATPase subunit, putative                      | 0,03728 | 0,8372 |
| TcCLB.507029.10  | hypothetical protein, conserved                               | 0,03714 | 0,8221 |
| TcCLB.508815.20  | hypothetical protein, conserved                               | 0,03714 | 0,8305 |
| TcCLB.503999.100 | phospholipid-transporting ATPase 1-like protein, putative     | 0,03711 | 0,8777 |
| TcCLB.506865.4   | hypothetical protein, conserved                               | 0,03706 | 0,8805 |
| TcCLB.511239.159 | inosine-guanine nucleoside hydrolase, putative                | 0,03695 | 0,9409 |
| TcCLB.507681.10  | hypothetical protein, conserved                               | 0,03693 | 0,9168 |
| TcCLB.510279.340 | mucin TcMUCII, putative                                       | 0,03688 | 0,9582 |
| TcCLB.504741.149 | hypothetical protein                                          | 0,03678 | 0,92   |
| TcCLB.507105.80  | dispersed gene family protein 1 (DGF-1), putative             | 0,03663 | 0,9376 |
| TcCLB.509627.10  | bilobe protein, conserved                                     | 0,03662 | 0,7614 |
| TcCLB.507811.70  | hypothetical protein, conserved                               | 0,0366  | 0,8266 |
| TcCLB.511259.161 | elongation factor 1-gamma (EF-1-gamma, pseudogene), p         | 0,03634 | 0,9483 |
| TcCLB.509599.90  | hypothetical protein, conserved                               | 0,03598 | 0,8129 |
| TcCLB.506359.60  | UTP-glucose-1-phosphate uridylyltransferase 2, putative       | 0,03595 | 0,8535 |

|                  |                                                            |         |        |
|------------------|------------------------------------------------------------|---------|--------|
| TcCLB.508165.130 | surface protease GP63, putative                            | 0,03592 | 0,9363 |
| TcCLB.507875.20  | glutamate dehydrogenase, putative                          | 0,03579 | 0,8457 |
| TcCLB.511433.20  | hypothetical protein, conserved                            | 0,03577 | 0,9197 |
| TcCLB.511249.90  | hypothetical protein, conserved                            | 0,03571 | 0,7948 |
| TcCLB.509525.230 | mucin-associated surface protein (MASP), putative          | 0,03566 | 0,9296 |
| TcCLB.511751.90  | hypothetical protein                                       | 0,0355  | 0,8657 |
| TcCLB.509757.20  | leucine carboxyl methyltransferase, putative               | 0,03541 | 0,8452 |
| TcCLB.503495.5   | hypothetical protein                                       | 0,03535 | 0,9229 |
| TcCLB.506135.40  | hypothetical protein, conserved                            | 0,03531 | 0,7891 |
| TcCLB.506811.160 | R27-2 protein, putative                                    | 0,03525 | 0,7197 |
| TcCLB.509031.10  | surface protease GP63 (pseudogene), putative               | 0,03515 | 0,9025 |
| TcCLB.508879.229 | chaperone DNAJ protein, putative                           | 0,03506 | 0,9199 |
| TcCLB.510255.10  | hypothetical protein, conserved                            | 0,03484 | 0,8631 |
| TcCLB.507959.310 | mucin TcMUCII, putative                                    | 0,03477 | 0,9505 |
| TcCLB.511667.140 | trans-sialidase (pseudogene), putative                     | 0,03472 | 0,8656 |
| TcCLB.503881.4   | hypothetical protein, conserved                            | 0,03471 | 0,9402 |
| TcCLB.509641.30  | Ubiquitin-like modifier-activating enzyme ATG7, putative ( | 0,03457 | 0,8111 |
| TcCLB.511391.90  | endosomal integral membrane protein, putative              | 0,03451 | 0,8241 |
| TcCLB.508831.100 | hypothetical protein, conserved                            | 0,03447 | 0,8393 |
| TcCLB.506925.230 | hypothetical protein, conserved                            | 0,03426 | 0,7503 |
| TcCLB.511577.30  | hypothetical protein, conserved                            | 0,03402 | 0,8285 |
| TcCLB.510817.30  | hypothetical protein, conserved (pseudogene)               | 0,034   | 0,8752 |
| TcCLB.511165.4   | cytoplasmic translation machinery associated protein, puta | 0,03395 | 0,9136 |
| TcCLB.511589.20  | hypothetical protein                                       | 0,0339  | 0,8636 |
| TcCLB.506685.10  | hypothetical protein, conserved                            | 0,03382 | 0,7847 |
| TcCLB.509515.20  | UDP-Gal or UDP-GlcNAc-dependent glycosyltransferase, pu    | 0,03371 | 0,9483 |
| TcCLB.412509.10  | retrotransposon hot spot (RHS) protein, putative           | 0,03368 | 0,919  |
| TcCLB.508741.340 | hypothetical protein, conserved                            | 0,03352 | 0,8329 |
| TcCLB.507883.25  | hypothetical protein, conserved                            | 0,03352 | 0,9381 |
| TcCLB.509847.10  | retrotransposon hot spot protein (RHS, pseudogene), putat  | 0,03349 | 0,9249 |
| TcCLB.509551.130 | hypothetical protein, conserved                            | 0,03331 | 0,8107 |
| TcCLB.508525.60  | hypothetical protein, conserved                            | 0,03317 | 0,7956 |
| TcCLB.504229.100 | trans-sialidase (pseudogene), putative                     | 0,03307 | 0,9051 |
| TcCLB.506817.30  | ribosomal protein L27, putative                            | 0,03291 | 0,7901 |
| TcCLB.510437.10  | dynein heavy chain, putative                               | 0,03287 | 0,856  |
| TcCLB.511143.19  | hypothetical protein, conserved                            | 0,03285 | 0,9048 |
| TcCLB.506821.140 | histone deacetylase, putative                              | 0,03284 | 0,8438 |
| TcCLB.509777.30  | trans-sialidase, Group II, putative                        | 0,0328  | 0,8419 |
| TcCLB.506327.50  | hypothetical protein, conserved                            | 0,03274 | 0,8413 |
| TcCLB.504081.280 | mucin-associated surface protein (MASP, pseudogene), pu    | 0,0326  | 0,9591 |
| TcCLB.511725.240 | hypothetical protein, conserved                            | 0,03251 | 0,7858 |
| TcCLB.509617.70  | subtilisin-like serine peptidase, putative                 | 0,03249 | 0,8081 |
| TcCLB.511665.60  | trans-sialidase (pseudogene), putative                     | 0,03241 | 0,8179 |
| TcCLB.506531.9   | hypothetical protein (fragment)                            | 0,03239 | 0,8849 |
| TcCLB.506945.210 | Zinc finger CCCH domain-containing protein 47 (zc3h47)     | 0,03229 | 0,7462 |

|                  |                                                                |         |        |
|------------------|----------------------------------------------------------------|---------|--------|
| TcCLB.503917.7   | RNA-binding protein, putative                                  | 0,03227 | 0,8388 |
| TcCLB.510731.120 | hypothetical protein, conserved                                | 0,03217 | 0,8619 |
| TcCLB.506501.160 | mucin-associated surface protein (MASP, pseudogene), pu        | 0,03197 | 0,9499 |
| TcCLB.504143.30  | kinesin protein (pseudogene), putative                         | 0,03196 | 0,8734 |
| TcCLB.506315.40  | hypothetical protein, conserved                                | 0,03184 | 0,8215 |
| TcCLB.511755.90  | hypothetical protein, conserved                                | 0,03175 | 0,8285 |
| TcCLB.505987.20  | hypothetical protein                                           | 0,03163 | 0,8103 |
| TcCLB.406725.10  | trans-sialidase (pseudogene), putative                         | 0,03151 | 0,9568 |
| TcCLB.509489.29  | proteasome regulatory non-ATP-ase subunit, putative (frag      | 0,03145 | 0,878  |
| TcCLB.506855.80  | ATP synthase, putative                                         | 0,03144 | 0,8139 |
| TcCLB.506649.100 | tRNA nucleotidyltransferase, putative                          | 0,03142 | 0,8259 |
| TcCLB.511785.10  | mucin-associated surface protein (MASP), putative              | 0,03129 | 0,9569 |
| TcCLB.505025.137 | mucin TcMUCII, putative                                        | 0,03118 | 0,9663 |
| TcCLB.509877.80  | ATPase domain protein, putative                                | 0,03116 | 0,8916 |
| TcCLB.509571.10  | hypothetical protein, conserved                                | 0,03092 | 0,8955 |
| TcCLB.511651.10  | ATP-dependent DEAD/H RNA helicase, putative                    | 0,03091 | 0,8879 |
| TcCLB.504029.60  | hypothetical protein, conserved                                | 0,03079 | 0,8447 |
| TcCLB.510397.39  | dispersed gene family protein 1 (DGF-1), putative              | 0,03073 | 0,9293 |
| TcCLB.506587.90  | surface protease GP63, putative                                | 0,0307  | 0,8729 |
| TcCLB.511409.60  | hypothetical protein, conserved                                | 0,03067 | 0,8835 |
| TcCLB.506181.97  | hypothetical protein, conserved                                | 0,03063 | 0,8918 |
| TcCLB.511019.74  | retrotransposon hot spot (RHS) protein, putative               | 0,03056 | 0,8466 |
| TcCLB.507491.100 | hypothetical protein, conserved                                | 0,03055 | 0,8348 |
| TcCLB.508647.260 | hypothetical protein, conserved                                | 0,03054 | 0,8751 |
| TcCLB.508479.140 | hypothetical protein, conserved                                | 0,03054 | 0,888  |
| TcCLB.508461.284 | mitochondrial carrier protein, putative                        | 0,03045 | 0,8756 |
| TcCLB.511353.34  | hypothetical protein, conserved                                | 0,0304  | 0,849  |
| TcCLB.510157.5   | trans-sialidase, putative (fragment)                           | 0,03025 | 0,9876 |
| TcCLB.511131.80  | hypothetical protein, conserved                                | 0,03022 | 0,7864 |
| TcCLB.503823.130 | hypothetical protein, conserved                                | 0,03018 | 0,7819 |
| TcCLB.510189.30  | surface protease GP63 (pseudogene), putative                   | 0,03018 | 0,9527 |
| TcCLB.503809.110 | phosphatidic acid phosphatase protein, putative                | 0,03005 | 0,8376 |
| TcCLB.510533.20  | hypothetical protein, conserved                                | 0,02997 | 0,8847 |
| TcCLB.504137.150 | hypothetical protein, conserved                                | 0,02987 | 0,8209 |
| TcCLB.509251.80  | trans-sialidase, Group V, putative                             | 0,02976 | 0,9243 |
| TcCLB.507069.40  | trans-sialidase, Group VI, putative                            | 0,02976 | 0,9452 |
| TcCLB.507953.60  | hypothetical protein                                           | 0,02972 | 0,9618 |
| TcCLB.508601.10  | mitochondrial DEAD box protein, putative                       | 0,02968 | 0,8849 |
| TcCLB.510687.110 | hypothetical protein, conserved                                | 0,02966 | 0,8583 |
| TcCLB.504179.100 | hypothetical protein, conserved                                | 0,02963 | 0,898  |
| TcCLB.511249.44  | vacuolar transporter chaperone, putative                       | 0,02962 | 0,8149 |
| TcCLB.507519.30  | Eukaryotic translation initiation factor 4E type 6, putative ( | 0,0296  | 0,8544 |
| TcCLB.507941.14  | hypothetical protein, conserved                                | 0,02948 | 0,9362 |
| TcCLB.509157.240 | hypothetical protein, conserved                                | 0,02927 | 0,9103 |
| TcCLB.505957.140 | trans-sialidase (pseudogene), putative                         | 0,02914 | 0,9313 |

|                  |                                                                |         |        |
|------------------|----------------------------------------------------------------|---------|--------|
| TcCLB.503899.20  | 40S ribosomal protein S16, putative                            | 0,02894 | 0,7736 |
| TcCLB.506869.34  | hypothetical protein, conserved                                | 0,02883 | 0,8786 |
| TcCLB.508865.4   | protein phosphatase 2C, putative                               | 0,02875 | 0,8643 |
| TcCLB.506855.240 | bilobe protein, conserved (pseudogene)                         | 0,02868 | 0,7841 |
| TcCLB.509693.110 | hypothetical protein, conserved                                | 0,02859 | 0,9033 |
| TcCLB.510943.70  | hypothetical protein, conserved                                | 0,02852 | 0,8859 |
| TcCLB.511155.4   | hypothetical protein, conserved                                | 0,02839 | 0,8934 |
| TcCLB.504397.9   | surface protease GP63, putative (fragment)                     | 0,02805 | 0,9429 |
| TcCLB.507957.260 | surface protease GP63 (pseudogene), putative                   | 0,02787 | 0,9645 |
| TcCLB.509599.120 | hypothetical protein, conserved                                | 0,02768 | 0,8937 |
| TcCLB.507793.40  | hypothetical protein, conserved                                | 0,02765 | 0,8849 |
| TcCLB.508173.200 | hypothetical protein, conserved                                | 0,02758 | 0,7735 |
| TcCLB.506247.30  | RNA editing complex protein MP63, putative                     | 0,02739 | 0,7869 |
| TcCLB.509429.310 | hypothetical protein, conserved                                | 0,02739 | 0,8507 |
| TcCLB.506297.70  | hypothetical protein, conserved                                | 0,02735 | 0,8425 |
| TcCLB.509081.110 | mucin-associated surface protein (MASP), putative              | 0,02733 | 0,9513 |
| TcCLB.503391.10  | ATP-dependent DEAD/H DNA helicase recQ, putative               | 0,02725 | 0,9565 |
| TcCLB.510431.110 | hypothetical protein                                           | 0,02724 | 0,8109 |
| TcCLB.506873.20  | hypothetical protein, conserved                                | 0,02715 | 0,8952 |
| TcCLB.506289.210 | surface protease GP63, putative                                | 0,02697 | 0,9471 |
| TcCLB.408799.19  | isopentenyl-diphosphate delta-isomerase (fragment) (idi1)      | 0,02696 | 0,9087 |
| TcCLB.511261.100 | chaperone DNAJ protein, putative                               | 0,02694 | 0,8709 |
| TcCLB.509453.50  | serine/threonine-protein phosphatase                           | 0,02689 | 0,8879 |
| TcCLB.511049.30  | hypothetical protein, conserved                                | 0,02687 | 0,9122 |
| TcCLB.508475.30  | surface protease GP63, putative                                | 0,02671 | 0,9163 |
| TcCLB.509643.40  | hypothetical protein, conserved                                | 0,02661 | 0,8963 |
| TcCLB.511217.39  | hypothetical protein, conserved                                | 0,02641 | 0,9146 |
| TcCLB.508707.190 | hypothetical protein, conserved                                | 0,02639 | 0,8248 |
| TcCLB.503501.50  | trans-sialidase (pseudogene), putative                         | 0,02637 | 0,9499 |
| TcCLB.508133.10  | hypothetical protein                                           | 0,02626 | 0,8939 |
| TcCLB.509527.90  | trans-sialidase (pseudogene), putative                         | 0,02622 | 0,8685 |
| TcCLB.508951.50  | calmodulin, putative                                           | 0,02605 | 0,928  |
| TcCLB.506529.310 | hypothetical protein, conserved                                | 0,02601 | 0,8752 |
| TcCLB.507237.170 | mucin-associated surface protein (MASP), putative              | 0,02597 | 0,9853 |
| TcCLB.503973.140 | hypothetical protein, conserved (pseudogene)                   | 0,02581 | 0,9614 |
| TcCLB.508153.470 | hypothetical protein, conserved                                | 0,02569 | 0,882  |
| TcCLB.510785.15  | hypothetical protein, conserved                                | 0,02566 | 0,9398 |
| TcCLB.508895.89  | intraflagellar transport protein 80, putative (fragment) (IF1) | 0,02565 | 0,8869 |
| TcCLB.511747.7   | cyclosome subunit, putative (fragment)                         | 0,02561 | 0,8835 |
| TcCLB.504741.130 | hypothetical protein, conserved                                | 0,0254  | 0,8194 |
| TcCLB.503521.60  | hypothetical protein, conserved                                | 0,02528 | 0,9291 |
| TcCLB.503973.10  | hypothetical protein                                           | 0,02525 | 0,9423 |
| TcCLB.508173.180 | nuclear transport factor (MTR2)                                | 0,02518 | 0,8389 |
| TcCLB.510085.54  | mucin TcMUCII (pseudogene), putative                           | 0,0251  | 0,9612 |
| TcCLB.503935.10  | dolichyl-lipid chaperone, putative (rft1)                      | 0,02509 | 0,896  |

|                  |                                                           |         |        |
|------------------|-----------------------------------------------------------|---------|--------|
| TcCLB.506297.130 | zinc finger ccch and cchc domain-containing protein       | 0,02502 | 0,8457 |
| TcCLB.509657.61  | elongation factor 1-gamma (EF-1-gamma, pseudogene), p     | 0,02493 | 0,9617 |
| TcCLB.504027.20  | hypothetical protein                                      | 0,02487 | 0,875  |
| TcCLB.458241.10  | hypothetical protein, conserved                           | 0,02487 | 0,9329 |
| TcCLB.511179.120 | hypothetical protein, conserved                           | 0,02484 | 0,9016 |
| TcCLB.509335.20  | retrotransposon hot spot protein (RHS, pseudogene), putat | 0,02462 | 0,9225 |
| TcCLB.504241.80  | trans-sialidase (pseudogene), putative                    | 0,02449 | 0,8784 |
| TcCLB.507093.80  | hypothetical protein, conserved                           | 0,02449 | 0,8819 |
| TcCLB.510181.90  | hypothetical protein, conserved                           | 0,02449 | 0,8924 |
| TcCLB.508445.70  | hypothetical protein, conserved                           | 0,02448 | 0,8808 |
| TcCLB.510691.4   | hypothetical protein, conserved                           | 0,02444 | 0,9489 |
| TcCLB.508153.300 | hypothetical protein, conserved                           | 0,0242  | 0,8161 |
| TcCLB.510519.80  | hypothetical protein, conserved                           | 0,02419 | 0,906  |
| TcCLB.508467.19  | hypothetical protein, conserved (fragment)                | 0,0241  | 0,943  |
| TcCLB.503679.20  | hypothetical protein, conserved                           | 0,02403 | 0,8872 |
| TcCLB.507857.4   | transcription elongation factor, putative                 | 0,02399 | 0,9005 |
| TcCLB.506685.50  | myosin heavy chain, putative (fragment)                   | 0,02379 | 0,9191 |
| TcCLB.511365.94  | anaphase promoting complex, subunit 10-like protein       | 0,02377 | 0,9137 |
| TcCLB.504171.40  | hypothetical protein, conserved                           | 0,02367 | 0,9103 |
| TcCLB.510229.10  | hypothetical protein, conserved                           | 0,02361 | 0,8597 |
| TcCLB.511517.37  | reticulon domain protein, putative                        | 0,0236  | 0,8817 |
| TcCLB.506933.30  | hypothetical protein, conserved                           | 0,02354 | 0,8628 |
| TcCLB.510621.20  | mucin-associated surface protein (MASP), putative         | 0,02352 | 0,9636 |
| TcCLB.510803.15  | mucin-associated surface protein (MASP, pseudogene), pu   | 0,02349 | 0,9818 |
| TcCLB.511261.160 | pyruvate dehydrogenase E1 component alpha subunit, puta   | 0,02344 | 0,8754 |
| TcCLB.506801.129 | hypothetical protein (fragment)                           | 0,02343 | 0,8775 |
| TcCLB.506245.230 | mucin-associated surface protein (MASP, pseudogene), pu   | 0,02334 | 0,9714 |
| TcCLB.511541.9   | hypothetical protein, conserved (fragment)                | 0,02326 | 0,885  |
| TcCLB.507023.270 | hypothetical protein, conserved                           | 0,0232  | 0,9126 |
| TcCLB.503829.80  | hypothetical protein, conserved                           | 0,02306 | 0,8412 |
| TcCLB.510647.60  | intraflagellar transport protein 27 (IFT27)               | 0,023   | 0,8974 |
| TcCLB.511303.140 | hypothetical protein, conserved                           | 0,02296 | 0,8854 |
| TcCLB.507803.40  | hypothetical protein                                      | 0,02274 | 0,8578 |
| TcCLB.503587.30  | trans-sialidase, Group V, putative                        | 0,02273 | 0,9652 |
| TcCLB.509791.170 | small GTPase, putative                                    | 0,02263 | 0,8951 |
| TcCLB.503721.20  | hypothetical protein, conserved                           | 0,02262 | 0,9051 |
| TcCLB.506829.5   | hypothetical protein, conserved                           | 0,02257 | 0,9335 |
| TcCLB.506945.230 | 40S ribosomal protein S14, putative                       | 0,02251 | 0,842  |
| TcCLB.507747.80  | mucin TcMUCII, putative                                   | 0,0225  | 0,9683 |
| TcCLB.504397.20  | surface protease GP63, putative                           | 0,02233 | 0,951  |
| TcCLB.509669.90  | hypothetical protein, conserved                           | 0,02216 | 0,8885 |
| TcCLB.508873.90  | trans-sialidase (pseudogene), putative                    | 0,02213 | 0,9614 |
| TcCLB.507963.60  | hypothetical protein, conserved                           | 0,02198 | 0,9416 |
| TcCLB.509055.40  | hypothetical protein, conserved                           | 0,02192 | 0,8872 |
| TcCLB.511261.90  | hypothetical protein, conserved                           | 0,02183 | 0,9015 |

|                  |                                                               |         |        |
|------------------|---------------------------------------------------------------|---------|--------|
| TcCLB.506435.30  | mitochondrial DNA polymerase I protein A, putative            | 0,02167 | 0,8728 |
| TcCLB.506579.129 | hypothetical protein, conserved (fragment)                    | 0,02152 | 0,9275 |
| TcCLB.511751.260 | hypothetical protein, conserved                               | 0,02146 | 0,9383 |
| TcCLB.506637.110 | hypothetical protein, conserved                               | 0,02126 | 0,8448 |
| TcCLB.510743.130 | denn domain-containing protein (pseudogene)                   | 0,02109 | 0,9438 |
| TcCLB.508029.59  | kinesin, putative                                             | 0,0208  | 0,9471 |
| TcCLB.510769.90  | 60S ribosomal protein L32, putative                           | 0,02074 | 0,8752 |
| TcCLB.508689.10  | hypothetical protein, conserved                               | 0,02052 | 0,9034 |
| TcCLB.507843.20  | trans-sialidase, putative (pseudogene)                        | 0,02036 | 0,9724 |
| TcCLB.504039.80  | surface protease GP63 (pseudogene), putative                  | 0,02035 | 0,9753 |
| TcCLB.508577.130 | hypothetical protein, conserved                               | 0,02022 | 0,8993 |
| TcCLB.511071.30  | hypothetical protein, conserved                               | 0,02019 | 0,93   |
| TcCLB.511277.420 | hypothetical protein, conserved                               | 0,0201  | 0,8663 |
| TcCLB.508929.20  | UDP-Gal or UDP-GlcNAc-dependent glycosyltransferase, putative | 0,01998 | 0,9495 |
| TcCLB.503651.40  | hypothetical protein                                          | 0,01991 | 0,9097 |
| TcCLB.507063.280 | hypothetical protein                                          | 0,01983 | 0,8717 |
| TcCLB.511643.61  | elongation factor 1-gamma (EF-1-gamma, pseudogene), putative  | 0,01981 | 0,9293 |
| TcCLB.509399.60  | hypothetical protein, conserved                               | 0,01979 | 0,8704 |
| TcCLB.505035.5   | hypothetical protein, conserved                               | 0,01979 | 0,9499 |
| TcCLB.509615.2   | endosomal integral membrane protein (pseudogene), putative    | 0,01977 | 0,9233 |
| TcCLB.511389.20  | hypothetical protein, conserved                               | 0,01976 | 0,9033 |
| TcCLB.508487.11  | retrotransposon hot spot protein (RHS, pseudogene), putative  | 0,01975 | 0,9351 |
| TcCLB.508831.60  | Low-affinity phosphate transporter, putative (PHO91)          | 0,01973 | 0,8614 |
| TcCLB.509915.55  | trans-sialidase (pseudogene), putative                        | 0,01971 | 0,9627 |
| TcCLB.507001.60  | hypothetical protein, conserved                               | 0,01968 | 0,8822 |
| TcCLB.504157.20  | beta-ketoacyl synthase family protein, putative               | 0,0196  | 0,9229 |
| TcCLB.506617.70  | variant-surface-glycoprotein phospholipase C (GPI-PLC)        | 0,01958 | 0,9301 |
| TcCLB.504073.20  | hypothetical protein, conserved                               | 0,01947 | 0,9065 |
| TcCLB.509157.250 | hypothetical protein, conserved                               | 0,01937 | 0,8966 |
| TcCLB.511523.40  | hypothetical protein, conserved                               | 0,01931 | 0,9255 |
| TcCLB.508307.184 | hypothetical protein, conserved                               | 0,01921 | 0,9386 |
| TcCLB.508647.20  | hypothetical protein                                          | 0,01916 | 0,8763 |
| TcCLB.511511.159 | zinc finger protein, putative                                 | 0,01916 | 0,886  |
| TcCLB.503987.20  | hypothetical protein, conserved                               | 0,01916 | 0,9197 |
| TcCLB.506203.80  | formin-like protein                                           | 0,01892 | 0,9068 |
| TcCLB.508489.30  | hypothetical protein, conserved                               | 0,01885 | 0,9171 |
| TcCLB.511127.200 | kinesin, putative                                             | 0,01874 | 0,9075 |
| TcCLB.507265.15  | transcription activator, putative (fragment)                  | 0,01871 | 0,8642 |
| TcCLB.507277.20  | hypothetical protein, conserved                               | 0,01863 | 0,9513 |
| TcCLB.505987.41  | hypothetical protein, conserved                               | 0,01846 | 0,9402 |
| TcCLB.509935.20  | hypothetical protein, conserved                               | 0,01841 | 0,8869 |
| TcCLB.508153.364 | hypothetical protein, conserved                               | 0,01838 | 0,9346 |
| TcCLB.509005.40  | hypothetical protein, conserved                               | 0,01837 | 0,9059 |
| TcCLB.511291.30  | lipoic acid synthetase, mitochondrial precursor, putative     | 0,0183  | 0,9217 |
| TcCLB.503813.30  | hypothetical protein, conserved                               | 0,0183  | 0,925  |



|                  |                                                           |         |        |
|------------------|-----------------------------------------------------------|---------|--------|
| TcCLB.511461.50  | nuclear transmembrane protein, putative (NP)              | 0,01821 | 0,9165 |
| TcCLB.507949.20  | RWD domain-containing protein                             | 0,01817 | 0,9326 |
| TcCLB.504125.20  | hypothetical protein                                      | 0,01811 | 0,9228 |
| TcCLB.503407.10  | hypothetical protein, conserved                           | 0,0181  | 0,9343 |
| TcCLB.506829.60  | hypothetical protein, conserved                           | 0,01805 | 0,929  |
| TcCLB.511727.40  | ubiquitin-conjugating enzyme E2, putative                 | 0,01789 | 0,885  |
| TcCLB.510165.40  | hypothetical protein, conserved                           | 0,01777 | 0,9027 |
| TcCLB.508799.140 | transcription modulator/accessory protein, putative       | 0,01775 | 0,8858 |
| TcCLB.507395.10  | dihydroceramide synthase, putative (DHCS)                 | 0,01775 | 0,9103 |
| TcCLB.510531.70  | hypothetical protein, conserved                           | 0,01739 | 0,9471 |
| TcCLB.511555.10  | mucin-associated surface protein (MASP), putative         | 0,01739 | 0,9565 |
| TcCLB.508753.40  | mucin-associated surface protein (MASP, pseudogene), pu   | 0,01738 | 0,9536 |
| TcCLB.509607.70  | serine/threonine protein kinase, putative                 | 0,01718 | 0,9452 |
| TcCLB.504533.20  | retrotransposon hot spot protein (RHS, pseudogene), putat | 0,01715 | 0,9347 |
| TcCLB.506567.10  | hypothetical protein, conserved                           | 0,01707 | 0,9298 |
| TcCLB.511487.150 | serine-alanine-and proline-rich protein, putative         | 0,01704 | 0,977  |
| TcCLB.504949.39  | DNA repair protein Rad9, putative (fragment) (Rad9)       | 0,01702 | 0,9293 |
| TcCLB.507257.160 | hypothetical protein, conserved                           | 0,01683 | 0,9381 |
| TcCLB.511541.30  | hypothetical protein, conserved                           | 0,01683 | 0,9417 |
| TcCLB.506959.90  | hypothetical protein, conserved                           | 0,01673 | 0,8774 |
| TcCLB.508873.530 | hypothetical protein, conserved (pseudogene)              | 0,01671 | 0,9579 |
| TcCLB.506789.220 | hypothetical protein, conserved                           | 0,01658 | 0,9137 |
| TcCLB.504021.109 | 40S ribosomal protein S3, putative                        | 0,01649 | 0,8608 |
| TcCLB.507671.39  | serine/threonine-protein phosphatase PP1                  | 0,01649 | 0,9544 |
| TcCLB.510391.20  | mucin-associated surface protein (MASP), putative         | 0,01637 | 0,9686 |
| TcCLB.509753.50  | retrotransposon hot spot protein (RHS, pseudogene), putat | 0,01616 | 0,9752 |
| TcCLB.510329.300 | hypothetical protein, conserved                           | 0,01608 | 0,9463 |
| TcCLB.510835.60  | hypothetical protein, conserved                           | 0,01606 | 0,9007 |
| TcCLB.503635.68  | 40S ribosomal protein S3A, putative                       | 0,01599 | 0,8827 |
| TcCLB.511585.220 | calcium/potassium channel (CAKC), putative                | 0,01597 | 0,9008 |
| TcCLB.503931.30  | hypothetical protein                                      | 0,01596 | 0,9299 |
| TcCLB.506327.70  | engulfment and cell motility domain 2, putative           | 0,01588 | 0,9201 |
| TcCLB.504081.260 | surface protease GP63, putative                           | 0,01586 | 0,9811 |
| TcCLB.504109.24  | dynein light chain, putative                              | 0,01584 | 0,945  |
| TcCLB.506297.80  | hypothetical protein, conserved                           | 0,01577 | 0,9065 |
| TcCLB.503955.110 | protein kinase, putative                                  | 0,01575 | 0,9314 |
| TcCLB.504041.10  | hypothetical protein, conserved                           | 0,01557 | 0,9266 |
| TcCLB.511745.40  | hypothetical protein, conserved                           | 0,01556 | 0,9293 |
| TcCLB.510757.30  | hypothetical protein, conserved                           | 0,01551 | 0,9505 |
| TcCLB.510421.220 | hypothetical protein, conserved                           | 0,01545 | 0,917  |
| TcCLB.511217.90  | hypothetical protein, conserved                           | 0,01543 | 0,8897 |
| TcCLB.511507.80  | ferric reductase transmembrane protein, putative          | 0,01543 | 0,9665 |
| TcCLB.507063.144 | hypothetical protein, conserved                           | 0,01533 | 0,943  |
| TcCLB.510645.40  | hypothetical protein, conserved (pseudogene)              | 0,01527 | 0,8644 |
| TcCLB.506401.290 | hypothetical protein, conserved                           | 0,0152  | 0,9597 |

|                  |                                                                             |         |        |
|------------------|-----------------------------------------------------------------------------|---------|--------|
| TcCLB.511165.20  | hypothetical protein                                                        | 0,01503 | 0,9273 |
| TcCLB.507911.30  | dispersed gene family protein 1 (DGF-1), putative                           | 0,01484 | 0,9563 |
| TcCLB.506529.546 | hypothetical protein                                                        | 0,01469 | 0,9788 |
| TcCLB.506151.30  | small GTP-binding protein Rab11, putative (TcRab11)                         | 0,01455 | 0,9246 |
| TcCLB.507033.20  | histone H3 variant, putative                                                | 0,01452 | 0,9313 |
| TcCLB.511753.90  | hypothetical protein, conserved                                             | 0,01452 | 0,9411 |
| TcCLB.507515.110 | hypothetical protein, conserved                                             | 0,01444 | 0,9332 |
| TcCLB.506933.70  | hypothetical protein, conserved                                             | 0,01443 | 0,9248 |
| TcCLB.508647.40  | replication factor C large subunit, putative                                | 0,01441 | 0,8906 |
| TcCLB.509719.80  | hypothetical protein, conserved                                             | 0,01438 | 0,9445 |
| TcCLB.506831.66  | hypothetical protein, conserved                                             | 0,0143  | 0,9597 |
| TcCLB.510421.190 | hypothetical protein, conserved                                             | 0,01424 | 0,9389 |
| TcCLB.507715.40  | GTP-binding elongation factor Tu family, putative                           | 0,014   | 0,9064 |
| TcCLB.508505.10  | hypothetical protein, conserved                                             | 0,014   | 0,9329 |
| TcCLB.503675.20  | Charged multivesicular body protein 3, putative                             | 0,01399 | 0,9479 |
| TcCLB.507071.100 | mucin-associated surface protein (MASP), putative                           | 0,01387 | 0,9777 |
| TcCLB.511667.120 | dispersed gene family protein 1 (DGF-1, pseudogene), putative               | 0,01381 | 0,9567 |
| TcCLB.511421.210 | hypothetical protein, conserved                                             | 0,0138  | 0,9154 |
| TcCLB.511229.100 | hypothetical protein, conserved                                             | 0,01376 | 0,924  |
| TcCLB.510187.340 | hypothetical protein, conserved                                             | 0,01352 | 0,9306 |
| TcCLB.510325.20  | hypothetical protein                                                        | 0,01351 | 0,9688 |
| TcCLB.507001.100 | transporter, putative                                                       | 0,01345 | 0,9535 |
| TcCLB.506295.150 | hypothetical protein                                                        | 0,01344 | 0,9525 |
| TcCLB.510251.19  | hypothetical protein, conserved                                             | 0,01325 | 0,9413 |
| TcCLB.504881.20  | hypothetical protein, conserved                                             | 0,01318 | 0,9051 |
| TcCLB.503593.60  | hypothetical protein, conserved                                             | 0,01317 | 0,9452 |
| TcCLB.507677.4   | hypothetical protein, conserved                                             | 0,01314 | 0,9612 |
| TcCLB.511071.70  | ubiquitin-conjugating enzyme E2, putative                                   | 0,01309 | 0,9409 |
| TcCLB.507159.90  | DNA-directed RNA polymerase III subunit, putative                           | 0,01284 | 0,9413 |
| TcCLB.506637.40  | hypothetical protein, conserved                                             | 0,01261 | 0,9568 |
| TcCLB.503929.10  | V-type ATPase, A subunit, putative                                          | 0,01253 | 0,9125 |
| TcCLB.510949.20  | thioredoxin, putative                                                       | 0,0125  | 0,9509 |
| TcCLB.511065.50  | phosphatidylinositol 3-kinase, putative                                     | 0,01243 | 0,9581 |
| TcCLB.511245.210 | hypothetical protein, conserved                                             | 0,01241 | 0,9379 |
| TcCLB.510197.64  | mucin-associated surface protein (MASP, pseudogene), putative               | 0,0123  | 0,9724 |
| TcCLB.507025.10  | hypothetical protein, conserved                                             | 0,01227 | 0,9296 |
| TcCLB.508723.30  | bilobe protein, conserved                                                   | 0,01223 | 0,9426 |
| TcCLB.510243.119 | hypothetical protein, conserved                                             | 0,01217 | 0,9529 |
| TcCLB.511837.10  | vesicle-associated membrane protein, putative                               | 0,01214 | 0,9458 |
| TcCLB.506943.160 | eukaryotic translation initiation factor 3 subunit 7-like protein, putative | 0,01205 | 0,9032 |
| TcCLB.509779.20  | hypothetical protein, conserved                                             | 0,0119  | 0,9627 |
| TcCLB.508465.80  | hypothetical protein, conserved                                             | 0,01184 | 0,9607 |
| TcCLB.506211.50  | membrane protein, putative                                                  | 0,01181 | 0,9553 |
| TcCLB.511367.110 | hypothetical protein, conserved                                             | 0,01167 | 0,9562 |
| TcCLB.506135.110 | mitochondrial RNA binding complex 1 subunit, putative                       | 0,01147 | 0,9524 |

|                  |                                                                 |          |        |
|------------------|-----------------------------------------------------------------|----------|--------|
| TcCLB.509683.117 | 40S ribosomal protein S4, putative                              | 0,01143  | 0,888  |
| TcCLB.508323.199 | ATP-dependent DEAD/H RNA helicase, putative (fragment)          | 0,01139  | 0,9614 |
| TcCLB.504081.9   | trans-sialidase (pseudogene), putative                          | 0,01135  | 0,9856 |
| TcCLB.419469.14  | kinesin, putative                                               | 0,01127  | 0,9784 |
| TcCLB.511281.60  | pyruvate kinase 2, putative                                     | 0,01126  | 0,943  |
| TcCLB.510259.30  | hypothetical protein, conserved                                 | 0,01121  | 0,9633 |
| TcCLB.511529.259 | hypothetical protein, conserved                                 | 0,01116  | 0,977  |
| TcCLB.511367.138 | chaperone DNAJ protein, putative                                | 0,01115  | 0,9417 |
| TcCLB.509205.40  | hypothetical protein, conserved                                 | 0,01113  | 0,9526 |
| TcCLB.511017.60  | hypothetical protein                                            | 0,01112  | 0,9295 |
| TcCLB.506745.20  | hypothetical protein, conserved                                 | 0,01105  | 0,9533 |
| TcCLB.511719.30  | hypothetical protein, conserved                                 | 0,01103  | 0,9614 |
| TcCLB.506443.50  | hypothetical protein, conserved                                 | 0,01101  | 0,9453 |
| TcCLB.506341.20  | hypothetical protein, conserved                                 | 0,01082  | 0,9614 |
| TcCLB.508153.120 | ubiquitin hydrolase, putative                                   | 0,01081  | 0,9389 |
| TcCLB.504113.10  | protein kinase, putative                                        | 0,01081  | 0,9614 |
| TcCLB.507949.80  | kinetoplast ribosomal PPR-repeat containing protein 3, putative | 0,01077  | 0,949  |
| TcCLB.511083.35  | mucin TcMUCII (pseudogene), putative                            | 0,0106   | 0,9833 |
| TcCLB.511419.10  | hypothetical protein                                            | 0,01039  | 0,967  |
| TcCLB.511809.60  | hypothetical protein, conserved                                 | 0,01035  | 0,9065 |
| TcCLB.490165.19  | hypothetical protein, conserved                                 | 0,01035  | 0,9748 |
| TcCLB.503431.70  | hypothetical protein, conserved                                 | 0,01033  | 0,9533 |
| TcCLB.506789.130 | double-strand-break repair protein rad21 homolog, putative      | 0,01029  | 0,9231 |
| TcCLB.506819.49  | hypothetical protein, conserved                                 | 0,01021  | 0,9667 |
| TcCLB.443397.9   | NADH-cytochrome b5 reductase, putative (fragment)               | 0,01011  | 0,9617 |
| TcCLB.506435.440 | hypothetical protein, conserved                                 | 0,01001  | 0,9489 |
| TcCLB.508153.480 | hypothetical protein, conserved                                 | 0,00996  | 0,9299 |
| TcCLB.503635.59  | 40S ribosomal protein S3A, putative                             | 0,009873 | 0,9287 |
| TcCLB.504029.21  | lipase, putative (fragment)                                     | 0,009796 | 0,9453 |
| TcCLB.508461.520 | hypothetical protein, conserved                                 | 0,009633 | 0,9255 |
| TcCLB.503815.4   | hypothetical protein, conserved                                 | 0,009265 | 0,9772 |
| TcCLB.507017.4   | hypothetical protein, conserved                                 | 0,009142 | 0,9802 |
| TcCLB.504255.4   | rhomboid-like protein                                           | 0,009106 | 0,9809 |
| TcCLB.508399.40  | trans-sialidase (pseudogene), putative                          | 0,0091   | 0,9642 |
| TcCLB.509829.9   | retrotransposon hot spot (RHS) protein, putative (fragment)     | 0,009001 | 0,9767 |
| TcCLB.510885.90  | hypothetical protein, conserved                                 | 0,009    | 0,9744 |
| TcCLB.506801.90  | hypothetical protein, conserved                                 | 0,008931 | 0,9627 |
| TcCLB.507765.130 | hypothetical protein, conserved                                 | 0,00892  | 0,9257 |
| TcCLB.511927.10  | hypothetical protein, conserved                                 | 0,008859 | 0,9771 |
| TcCLB.510289.60  | hypothetical protein                                            | 0,00883  | 0,9736 |
| TcCLB.508151.20  | mucin-associated surface protein (MASP), putative               | 0,008737 | 0,9855 |
| TcCLB.503917.50  | hypothetical protein, conserved                                 | 0,008628 | 0,9679 |
| TcCLB.507819.40  | retrotransposon hot spot protein (RHS, pseudogene), putative    | 0,008621 | 0,975  |
| TcCLB.492827.10  | trans-sialidase, putative (fragment)                            | 0,00862  | 0,9951 |
| TcCLB.511671.140 | hypothetical protein                                            | 0,008609 | 0,9621 |

|                  |                                                               |          |        |
|------------------|---------------------------------------------------------------|----------|--------|
| TcCLB.510257.20  | hypothetical protein, conserved                               | 0,008607 | 0,9591 |
| TcCLB.503659.30  | trans-sialidase, putative                                     | 0,008606 | 0,9836 |
| TcCLB.509191.9   | dispersed gene family protein 1 (DGF-1, pseudogene), putative | 0,008491 | 0,9841 |
| TcCLB.508827.130 | hypothetical protein, conserved                               | 0,008345 | 0,9571 |
| TcCLB.412435.10  | hypothetical protein, conserved                               | 0,008319 | 0,9642 |
| TcCLB.507049.130 | hypothetical protein, conserved (pseudogene)                  | 0,008227 | 0,9789 |
| TcCLB.399033.10  | hypothetical protein                                          | 0,008222 | 0,9759 |
| TcCLB.508351.50  | rho-like GTP binding protein, putative                        | 0,008123 | 0,963  |
| TcCLB.508613.60  | hypothetical protein, conserved                               | 0,008078 | 0,9544 |
| TcCLB.508257.130 | hypothetical protein, conserved                               | 0,007873 | 0,9699 |
| TcCLB.511183.400 | trans-sialidase, Group VI, putative                           | 0,007697 | 0,9833 |
| TcCLB.507959.41  | mucin TcMUCII, putative                                       | 0,007679 | 0,9924 |
| TcCLB.508933.10  | dihydrolipoamide dehydrogenase, putative                      | 0,007648 | 0,9652 |
| TcCLB.509897.95  | hypothetical protein, conserved (pseudogene)                  | 0,007613 | 0,9704 |
| TcCLB.511585.70  | heat shock protein 70 (hsp70), putative                       | 0,007543 | 0,9568 |
| TcCLB.506587.100 | surface protease GP63, putative                               | 0,007464 | 0,9652 |
| TcCLB.509471.20  | Present in the outer mitochondrial membrane proteome 3        | 0,007324 | 0,9513 |
| TcCLB.509741.30  | hypothetical protein, conserved                               | 0,007205 | 0,9698 |
| TcCLB.508221.697 | trans-sialidase (pseudogene), putative                        | 0,007187 | 0,9845 |
| TcCLB.506559.480 | hypothetical protein, conserved                               | 0,007123 | 0,9756 |
| TcCLB.509767.200 | hypothetical protein, conserved                               | 0,007116 | 0,97   |
| TcCLB.442287.10  | serine/threonine protein phosphatase (pseudogene), putative   | 0,00711  | 0,9622 |
| TcCLB.511145.60  | ATP synthase F1 subunit gamma protein, putative (ATPF1C)      | 0,007008 | 0,9622 |
| TcCLB.510667.50  | hypothetical protein, conserved                               | 0,006992 | 0,9719 |
| TcCLB.510167.10  | phosphatidylinositol 3-kinase 2, putative                     | 0,006698 | 0,9614 |
| TcCLB.504197.20  | mucin-associated surface protein (MASP), putative             | 0,006625 | 0,9871 |
| TcCLB.511729.20  | hypothetical protein                                          | 0,006477 | 0,9663 |
| TcCLB.509999.50  | lipase domain protein, putative                               | 0,006474 | 0,9595 |
| TcCLB.511821.140 | hypothetical protein, conserved                               | 0,006467 | 0,9683 |
| TcCLB.507991.10  | hypothetical protein, conserved                               | 0,006446 | 0,9779 |
| TcCLB.506287.180 | hypothetical protein, conserved                               | 0,006432 | 0,9724 |
| TcCLB.511873.5   | hypothetical protein                                          | 0,006281 | 0,9818 |
| TcCLB.508161.40  | mucin TcMUCII (pseudogene), putative                          | 0,006248 | 0,9913 |
| TcCLB.511827.130 | dispersed gene family protein 1 (DGF-1), putative             | 0,006245 | 0,9674 |
| TcCLB.507957.36  | syntaxin binding protein (pseudogene), putative               | 0,006135 | 0,9909 |
| TcCLB.503987.10  | cop-coated vesicle membrane protein p24 precursor, putative   | 0,006098 | 0,9704 |
| TcCLB.506529.230 | hypothetical protein, conserved                               | 0,006087 | 0,9767 |
| TcCLB.506649.30  | hypothetical protein, conserved                               | 0,005969 | 0,9636 |
| TcCLB.507053.130 | hypothetical protein, conserved                               | 0,00578  | 0,9724 |
| TcCLB.432677.20  | heat shock 70 kDa protein, mitochondrial precursor, putative  | 0,005756 | 0,9569 |
| TcCLB.507991.90  | hypothetical protein                                          | 0,005571 | 0,9732 |
| TcCLB.506667.140 | hypothetical protein                                          | 0,00557  | 0,9929 |
| TcCLB.509803.60  | retrotransposon hot spot protein (RHS, pseudogene), putative  | 0,005525 | 0,9895 |
| TcCLB.506747.20  | dihydroorotase, putative                                      | 0,005499 | 0,9821 |
| TcCLB.507105.40  | 60S ribosomal protein L44 (RPL44)                             | 0,005408 | 0,9756 |

|                  |                                                               |          |        |
|------------------|---------------------------------------------------------------|----------|--------|
| TcCLB.506835.110 | protein mkt1, putative                                        | 0,005352 | 0,9627 |
| TcCLB.509965.60  | RNA decapping enzyme, putative (Dcp2)                         | 0,005065 | 0,983  |
| TcCLB.506791.30  | hypothetical protein, conserved                               | 0,00503  | 0,9672 |
| TcCLB.510329.180 | hypothetical protein, conserved                               | 0,004983 | 0,9929 |
| TcCLB.510073.75  | hypothetical protein, conserved                               | 0,004957 | 0,9908 |
| TcCLB.507209.20  | hypothetical protein, conserved                               | 0,004855 | 0,9801 |
| TcCLB.507773.20  | hypothetical protein                                          | 0,004846 | 0,9838 |
| TcCLB.511857.70  | hypothetical protein, conserved                               | 0,004823 | 0,9752 |
| TcCLB.506811.90  | hypothetical protein, conserved                               | 0,004719 | 0,9761 |
| TcCLB.506859.249 | hypothetical protein, conserved                               | 0,00441  | 0,9851 |
| TcCLB.508347.120 | hypothetical protein, conserved                               | 0,004374 | 0,9756 |
| TcCLB.504163.30  | 40S ribosomal protein S9, putative                            | 0,004272 | 0,9667 |
| TcCLB.507711.10  | intraflagellar transport protein 57/55, putative (IFT57/55)   | 0,004112 | 0,9789 |
| TcCLB.509569.150 | hypothetical protein, conserved                               | 0,004025 | 0,9898 |
| TcCLB.508819.30  | hypothetical protein, conserved                               | 0,003998 | 0,9826 |
| TcCLB.510483.154 | mucin-associated surface protein (MASP), putative             | 0,003852 | 0,9954 |
| TcCLB.509373.39  | surface protease GP63, putative (fragment)                    | 0,003841 | 0,9965 |
| TcCLB.507793.20  | cysteine synthase, putative                                   | 0,003821 | 0,981  |
| TcCLB.508541.120 | trans-sialidase (pseudogene), putative                        | 0,003769 | 0,9959 |
| TcCLB.511753.100 | ABC transporter, putative                                     | 0,003706 | 0,9832 |
| TcCLB.511189.84  | hypothetical protein, conserved                               | 0,003683 | 0,9883 |
| TcCLB.506883.20  | hypothetical protein, conserved                               | 0,003625 | 0,9824 |
| TcCLB.511537.8   | ABC transporter of the mitochondrion, putative (fragment)     | 0,003597 | 0,9838 |
| TcCLB.508015.20  | hypothetical protein                                          | 0,003585 | 0,9908 |
| TcCLB.510575.230 | hypothetical protein, conserved                               | 0,003539 | 0,9837 |
| TcCLB.506605.170 | inosine-guanine nucleoside hydrolase, putative (IG-NH)        | 0,003463 | 0,9844 |
| TcCLB.507959.224 | surface protease GP63 (pseudogene), putative                  | 0,003438 | 0,9954 |
| TcCLB.508445.80  | hypothetical protein, conserved                               | 0,003352 | 0,9833 |
| TcCLB.511753.30  | kinesin, putative                                             | 0,003286 | 0,9809 |
| TcCLB.504341.10  | trans-sialidase, Group IV, putative                           | 0,003196 | 0,9908 |
| TcCLB.509959.10  | retrotransposon hot spot protein (RHS, pseudogene), putative  | 0,003173 | 0,9931 |
| TcCLB.507949.130 | glycerol-3-phosphate dehydrogenase (FAD-dependent), putative  | 0,003111 | 0,9892 |
| TcCLB.509979.330 | surface protease GP63 (pseudogene), putative                  | 0,002945 | 0,9921 |
| TcCLB.504911.20  | mucin-associated surface protein (MASP, pseudogene), putative | 0,002814 | 0,9983 |
| TcCLB.507951.154 | cytochrome b5, putative                                       | 0,002761 | 0,9892 |
| TcCLB.506289.140 | surface protease GP63, putative                               | 0,002757 | 0,9926 |
| TcCLB.508943.20  | protein kinase, putative                                      | 0,002692 | 0,9905 |
| TcCLB.506597.40  | trans-sialidase, Group V, putative                            | 0,002626 | 0,9974 |
| TcCLB.508979.60  | mucin-associated surface protein (MASP), putative             | 0,00253  | 0,9937 |
| TcCLB.503879.30  | hypothetical protein, conserved                               | 0,002316 | 0,9886 |
| TcCLB.508153.610 | Putative intraflagellar transport protein C3 (PIFTC3)         | 0,002308 | 0,988  |
| TcCLB.511381.60  | hypothetical protein, conserved                               | 0,002207 | 0,9922 |
| TcCLB.503651.30  | hypothetical protein                                          | 0,002206 | 0,9888 |
| TcCLB.510693.274 | mucin TcMUCII (pseudogene), putative                          | 0,002196 | 0,9954 |
| TcCLB.506215.19  | intraflagellar transport protein 140, putative (IFT140)       | 0,002193 | 0,9831 |

|                  |                                                              |            |        |
|------------------|--------------------------------------------------------------|------------|--------|
| TcCLB.509561.60  | hypothetical protein, conserved                              | 0,00215    | 0,9927 |
| TcCLB.504249.15  | surface protease GP63 (pseudogene), putative                 | 0,002133   | 0,9961 |
| TcCLB.508629.120 | mucin-associated surface protein (MASP), putative            | 0,002108   | 0,9908 |
| TcCLB.507771.50  | glycerolphosphate mutase, putative                           | 0,001903   | 0,9909 |
| TcCLB.507041.10  | hypothetical protein, conserved                              | 0,001851   | 0,9898 |
| TcCLB.510665.20  | hypothetical protein, conserved                              | 0,001799   | 0,9915 |
| TcCLB.508381.20  | hypothetical protein, conserved (pseudogene)                 | 0,001708   | 0,996  |
| TcCLB.510483.340 | beta galactofuranosyl glycosyltransferase (pseudogene), p    | 0,001682   | 0,9965 |
| TcCLB.508177.50  | hypothetical protein                                         | 0,001674   | 0,9941 |
| TcCLB.509879.30  | hypothetical protein, conserved                              | 0,001585   | 0,993  |
| TcCLB.507773.50  | hypothetical protein, conserved                              | 0,001556   | 0,992  |
| TcCLB.507993.130 | 60S ribosomal protein L7, putative                           | 0,001535   | 0,991  |
| TcCLB.503677.29  | hypothetical protein, conserved                              | 0,001467   | 0,994  |
| TcCLB.507513.20  | hypothetical protein, conserved                              | 0,001453   | 0,9926 |
| TcCLB.504153.160 | metallo-peptidase, Clan MA(E) Family M32                     | 0,001297   | 0,989  |
| TcCLB.509591.40  | hypothetical protein, conserved                              | 0,001159   | 0,9926 |
| TcCLB.503811.45  | hypothetical protein, conserved                              | 0,001144   | 0,9969 |
| TcCLB.507601.80  | hypothetical protein, conserved                              | 0,001041   | 0,9964 |
| TcCLB.436521.9   | mevalonate kinase, putative (fragment)                       | 0,0009913  | 0,9956 |
| TcCLB.504239.20  | mucin TcMUCII, putative                                      | 0,0009251  | 0,9987 |
| TcCLB.506559.10  | hypothetical protein                                         | 0,0008556  | 0,996  |
| TcCLB.506559.320 | hypothetical protein, conserved                              | 0,0007599  | 0,9968 |
| TcCLB.506289.240 | hypothetical protein                                         | 0,0007431  | 0,9989 |
| TcCLB.506405.100 | hypothetical protein, conserved                              | 0,0005796  | 0,9962 |
| TcCLB.509791.60  | hypothetical protein, conserved                              | 0,0005406  | 0,9969 |
| TcCLB.504425.90  | aldose 1-epimerase-like protein, putative                    | 0,0005398  | 0,9982 |
| TcCLB.506337.20  | hypothetical protein, conserved                              | 0,0005059  | 0,9975 |
| TcCLB.508153.280 | 60S ribosomal protein L13, putative                          | 0,0004814  | 0,9964 |
| TcCLB.510149.50  | tfiih basal transcription factor complex helicase xpb subuni | 0,0004579  | 0,9968 |
| TcCLB.508707.170 | outer dynein arm docking complex, putative (DC2)             | 0,0004463  | 0,9975 |
| TcCLB.511423.80  | Transmembrane protein 231, putative                          | 0,0004257  | 0,9978 |
| TcCLB.510609.100 | hypothetical protein, conserved                              | 0,00007583 | 0,9997 |
| TcCLB.508261.150 | trans-sialidase (pseudogene), putative                       | 0,00006967 | 0,9998 |
| TcCLB.508193.30  | dispersed gene family protein 1 (DGF-1, pseudogene), puta    | 0,00006735 | 0,9998 |
| TcCLB.508269.80  | retrotransposon hot spot protein (RHS, pseudogene), putat    | -0,0001254 | 0,9997 |
| TcCLB.510099.20  | hypothetical protein, conserved                              | -0,0001308 | 0,9994 |
| TcCLB.506425.10  | serine carboxypeptidase S28, putative                        | -0,0002832 | 0,9986 |
| TcCLB.510359.460 | mucin-associated surface protein (MASP), putative            | -0,0002844 | 0,9997 |
| TcCLB.511867.40  | hypothetical protein, conserved                              | -0,0005147 | 0,9982 |
| TcCLB.509179.70  | hypothetical protein, conserved                              | -0,0005766 | 0,9986 |
| TcCLB.507049.110 | hypothetical protein, conserved                              | -0,0006474 | 0,9982 |
| TcCLB.510533.150 | hypothetical protein                                         | -0,000673  | 0,9964 |
| TcCLB.503761.50  | hypothetical protein                                         | -0,0006794 | 0,9987 |
| TcCLB.509031.20  | trans-sialidase, putative (fragment)                         | -0,0007076 | 0,999  |
| TcCLB.508175.146 | 60S ribosomal protein L23a, putative                         | -0,0007455 | 0,9945 |

|                  |                                                             |            |        |
|------------------|-------------------------------------------------------------|------------|--------|
| TcCLB.429185.31  | trans-sialidase (pseudogene), putative                      | -0,0008439 | 0,9987 |
| TcCLB.506691.70  | hypothetical protein, conserved                             | -0,0008452 | 0,9962 |
| TcCLB.511081.41  | mucin-associated surface protein (MASP, pseudogene), pu     | -0,0008479 | 0,9987 |
| TcCLB.511897.19  | zinc-finger multi-pass transmembrane protein, putative      | -0,0009042 | 0,9964 |
| TcCLB.503885.60  | hypothetical protein, conserved                             | -0,0009236 | 0,9959 |
| TcCLB.510609.65  | U6 snRNA-associated Sm-like protein LSm3p                   | -0,0009995 | 0,998  |
| TcCLB.503781.30  | hypothetical protein, conserved                             | -0,001061  | 0,9975 |
| TcCLB.511751.170 | protein kinase, putative                                    | -0,001102  | 0,9926 |
| TcCLB.503597.5   | hypothetical protein (fragment)                             | -0,001302  | 0,9954 |
| TcCLB.503999.50  | ubiquitin-conjugating enzyme, putative                      | -0,001395  | 0,9932 |
| TcCLB.506479.100 | hypothetical protein, conserved                             | -0,001475  | 0,995  |
| TcCLB.508747.59  | mucin-associated surface protein (MASP), putative           | -0,001507  | 0,9974 |
| TcCLB.507485.10  | hypothetical protein, conserved                             | -0,001526  | 0,9964 |
| TcCLB.506405.149 | ribosomal protein L21E (60S), putative                      | -0,001629  | 0,9843 |
| TcCLB.508693.60  | hypothetical protein, conserved                             | -0,001674  | 0,9941 |
| TcCLB.412393.10  | trans-sialidase, putative (pseudogene)                      | -0,001693  | 0,9986 |
| TcCLB.506007.30  | Protein C21orf2 homolog, putative                           | -0,001843  | 0,9923 |
| TcCLB.510769.49  | 40S ribosomal protein S6, putative                          | -0,00195   | 0,9841 |
| TcCLB.508547.90  | hypothetical protein, conserved                             | -0,002039  | 0,9952 |
| TcCLB.504203.10  | hypothetical protein, conserved                             | -0,002232  | 0,9898 |
| TcCLB.504639.50  | retrotransposon hot spot protein (RHS, pseudogene), putat   | -0,002331  | 0,9908 |
| TcCLB.508457.10  | Kinesin-13 6, putative (KIN13-6)                            | -0,002333  | 0,9895 |
| TcCLB.507229.25  | trans-sialidase (pseudogene), putative                      | -0,002369  | 0,9915 |
| TcCLB.508625.120 | leucine carboxyl methyltransferase, putative                | -0,002433  | 0,9894 |
| TcCLB.511173.241 | mucin TcMUCII (pseudogene), putative                        | -0,002488  | 0,9964 |
| TcCLB.507053.120 | hypothetical protein, conserved                             | -0,002555  | 0,9892 |
| TcCLB.506925.210 | hypothetical protein, conserved                             | -0,002584  | 0,9917 |
| TcCLB.509965.429 | hypothetical protein, conserved                             | -0,002668  | 0,9957 |
| TcCLB.510333.10  | hypothetical protein, conserved                             | -0,002737  | 0,984  |
| TcCLB.509905.130 | dispersed gene family protein 1 (DGF-1, pseudogene), puta   | -0,002841  | 0,9841 |
| TcCLB.510293.40  | ubiquitin/ribosomal protein S27a, putative                  | -0,002876  | 0,9931 |
| TcCLB.508737.80  | mannosyltransferase-like protein, putative                  | -0,002931  | 0,9832 |
| TcCLB.506993.31  | mucin-associated surface protein (MASP, pseudogene), pu     | -0,002976  | 0,9965 |
| TcCLB.504239.40  | surface protease GP63 (pseudogene), putative                | -0,002992  | 0,9973 |
| TcCLB.509039.20  | bystin, putative                                            | -0,003005  | 0,981  |
| TcCLB.510463.180 | trans-sialidase (pseudogene), putative                      | -0,003074  | 0,9957 |
| TcCLB.511729.50  | hypothetical protein, conserved                             | -0,003089  | 0,9809 |
| TcCLB.504055.50  | hypothetical protein, conserved                             | -0,003196  | 0,9831 |
| TcCLB.509067.60  | Tetratricopeptide-like helical domain containing protein (F | -0,003422  | 0,9676 |
| TcCLB.471901.10  | hypothetical protein, conserved                             | -0,003453  | 0,9803 |
| TcCLB.506577.160 | hypothetical protein, conserved                             | -0,003472  | 0,9862 |
| TcCLB.506885.430 | lipoic acid containing carrier protein, putative (GCVH)     | -0,003503  | 0,9892 |
| TcCLB.511127.90  | hypothetical protein, conserved                             | -0,003515  | 0,987  |
| TcCLB.507801.90  | beta-ketoacyl-ACP reductase                                 | -0,003545  | 0,9865 |
| TcCLB.506563.70  | calpain-like cysteine peptidase (pseudogene), putative      | -0,003614  | 0,9895 |

|                  |                                                               |           |        |
|------------------|---------------------------------------------------------------|-----------|--------|
| TcCLB.508641.280 | hypothetical protein, conserved                               | -0,003638 | 0,9724 |
| TcCLB.506507.30  | beta galactofuranosyl glycosyltransferase, putative           | -0,003739 | 0,9871 |
| TcCLB.510547.14  | mucin-associated surface protein (MASP, pseudogene), pu       | -0,00374  | 0,995  |
| TcCLB.506869.30  | hypothetical protein, conserved                               | -0,003766 | 0,9898 |
| TcCLB.506559.454 | GTP-binding protein, putative                                 | -0,00377  | 0,9803 |
| TcCLB.506909.155 | mucin-associated surface protein (MASP, pseudogene), pu       | -0,003806 | 0,996  |
| TcCLB.508881.100 | hypothetical protein, conserved                               | -0,00382  | 0,9788 |
| TcCLB.503745.20  | hypothetical protein, conserved                               | -0,003861 | 0,9779 |
| TcCLB.503593.70  | eukaryotic peptide chain release factor subunit 1, putative   | -0,003931 | 0,9813 |
| TcCLB.507515.20  | hypothetical protein, conserved                               | -0,003982 | 0,9731 |
| TcCLB.506833.30  | serine/threonine protein phosphatase, putative                | -0,004219 | 0,9801 |
| TcCLB.511153.90  | phosphatase, putative                                         | -0,00428  | 0,9779 |
| TcCLB.506155.10  | hypothetical protein, conserved                               | -0,00431  | 0,9808 |
| TcCLB.506707.20  | ATP-dependent DEAD/H RNA helicase (pseudogene), putative      | -0,004431 | 0,9917 |
| TcCLB.503801.70  | hypothetical protein                                          | -0,00447  | 0,9785 |
| TcCLB.509111.19  | hypothetical protein, conserved                               | -0,004549 | 0,9892 |
| TcCLB.508235.40  | protein kinase, putative (fragment)                           | -0,004665 | 0,987  |
| TcCLB.503903.50  | hypothetical protein, conserved                               | -0,00468  | 0,9752 |
| TcCLB.508413.40  | serine/threonine protein phosphatase, putative                | -0,0047   | 0,9762 |
| TcCLB.509789.20  | hypothetical protein                                          | -0,004757 | 0,9727 |
| TcCLB.510523.29  | hypothetical protein, conserved (fragment)                    | -0,004767 | 0,9862 |
| TcCLB.511555.90  | acyl-CoA binding protein, putative                            | -0,004784 | 0,9729 |
| TcCLB.509259.111 | N-acetyltransferase complex ARD1 subunit (pseudogene),        | -0,004807 | 0,9921 |
| TcCLB.508153.290 | 60S ribosomal protein L13, putative                           | -0,00484  | 0,9618 |
| TcCLB.507009.80  | hypothetical protein, conserved                               | -0,004982 | 0,9831 |
| TcCLB.507831.90  | 60S ribosomal protein L34, putative                           | -0,005018 | 0,9789 |
| TcCLB.509693.30  | hypothetical protein, conserved                               | -0,005046 | 0,9818 |
| TcCLB.504055.60  | hypothetical protein, conserved                               | -0,005056 | 0,983  |
| TcCLB.510303.250 | hypothetical protein, conserved                               | -0,005103 | 0,9676 |
| TcCLB.506905.4   | proliferator-activated receptor-interacting protein (PRIP) ir | -0,005132 | 0,9868 |
| TcCLB.505025.70  | mucin-associated surface protein (MASP), putative             | -0,005163 | 0,9909 |
| TcCLB.504427.250 | ubiquitin-activating enzyme E1, putative                      | -0,005184 | 0,9567 |
| TcCLB.506767.110 | mucin-associated surface protein (MASP), putative             | -0,005305 | 0,9908 |
| TcCLB.509805.200 | acetyltransferase, putative                                   | -0,005377 | 0,9729 |
| TcCLB.511293.10  | extracellular receptor, putative                              | -0,00557  | 0,9809 |
| TcCLB.510287.40  | hypothetical protein                                          | -0,005781 | 0,9773 |
| TcCLB.511867.70  | hypothetical protein                                          | -0,005823 | 0,975  |
| TcCLB.509867.20  | mucin-associated surface protein (MASP), putative             | -0,005975 | 0,9929 |
| TcCLB.509317.60  | RNA-binding protein, putative                                 | -0,006144 | 0,9627 |
| TcCLB.509999.100 | hypothetical protein, conserved                               | -0,006172 | 0,9781 |
| TcCLB.510027.10  | GDP-mannose 4,6 dehydratase, putative                         | -0,006177 | 0,9726 |
| TcCLB.508277.160 | glutaminyl-tRNA synthetase, putative                          | -0,006191 | 0,9495 |
| TcCLB.509901.130 | Iron-sulfur assembly protein 1, putative (Isa1)               | -0,006253 | 0,9718 |
| TcCLB.504873.10  | UDP-Gal or UDP-GlcNAc-dependent glycosyltransferase, pu       | -0,006268 | 0,9855 |
| TcCLB.511625.90  | mucin-associated surface protein (MASP), putative             | -0,006337 | 0,9877 |



|                  |                                                             |           |        |
|------------------|-------------------------------------------------------------|-----------|--------|
| TcCLB.507925.50  | hypothetical protein, conserved                             | -0,006341 | 0,9586 |
| TcCLB.506811.70  | hypothetical protein                                        | -0,006353 | 0,9654 |
| TcCLB.506755.220 | hypothetical protein, conserved                             | -0,006361 | 0,9675 |
| TcCLB.510183.40  | hypothetical protein, conserved                             | -0,00637  | 0,9808 |
| TcCLB.503579.90  | hypothetical protein, conserved                             | -0,006402 | 0,9719 |
| TcCLB.511511.139 | zinc finger protein, putative                               | -0,006508 | 0,9639 |
| TcCLB.504507.10  | hypothetical protein, conserved                             | -0,006517 | 0,975  |
| TcCLB.507603.54  | hypothetical protein, conserved                             | -0,006534 | 0,9812 |
| TcCLB.511233.30  | hypothetical protein, conserved                             | -0,006622 | 0,9724 |
| TcCLB.507993.190 | serine/threonine protein phosphatase type 5, putative       | -0,006663 | 0,9603 |
| TcCLB.503779.60  | hypothetical protein, conserved                             | -0,006744 | 0,9677 |
| TcCLB.511127.220 | cdc2-related kinase 12 (CRK12)                              | -0,006861 | 0,9627 |
| TcCLB.475705.9   | hypothetical protein, conserved                             | -0,006951 | 0,9731 |
| TcCLB.507107.30  | UDP-Gal or UDP-GlcNAc-dependent glycosyltransferase, pu     | -0,006968 | 0,9898 |
| TcCLB.510257.24  | hypothetical protein, conserved                             | -0,00715  | 0,976  |
| TcCLB.507951.130 | hypothetical protein                                        | -0,007239 | 0,9673 |
| TcCLB.508075.60  | hypothetical protein, conserved                             | -0,007275 | 0,9665 |
| TcCLB.508387.40  | hypothetical protein, conserved                             | -0,007317 | 0,9782 |
| TcCLB.508479.216 | hypothetical protein, conserved                             | -0,007329 | 0,9659 |
| TcCLB.508355.124 | hypothetical protein, conserved                             | -0,007357 | 0,977  |
| TcCLB.507603.250 | hypothetical protein, conserved                             | -0,00736  | 0,9584 |
| TcCLB.506661.60  | hypothetical protein, conserved                             | -0,007403 | 0,9678 |
| TcCLB.511345.10  | retrotransposon hot spot (RHS) protein, putative            | -0,007561 | 0,977  |
| TcCLB.509471.77  | histone H3, putative                                        | -0,007609 | 0,9491 |
| TcCLB.511529.68  | cyclin-dependent kinases regulatory subunit, putative (P12) | -0,007681 | 0,9639 |
| TcCLB.506629.120 | hypothetical protein, conserved                             | -0,00772  | 0,9622 |
| TcCLB.509231.5   | hypothetical protein, conserved (fragment)                  | -0,007741 | 0,9917 |
| TcCLB.510431.200 | LisH domain-containing protein FOPNL, putative (fopnl)      | -0,007798 | 0,9678 |
| TcCLB.507603.150 | dolichyl-P-Man:GDP-Man5GlcNAc2-PP-dolichyl alpha-1,2-n      | -0,007813 | 0,9615 |
| TcCLB.508027.100 | hypothetical protein                                        | -0,007821 | 0,9612 |
| TcCLB.509901.140 | COP9 signalosome complex subunit 5, putative                | -0,007833 | 0,9661 |
| TcCLB.508109.50  | retrotransposon hot spot protein (RHS, pseudogene), putat   | -0,007931 | 0,9772 |
| TcCLB.510955.10  | hypothetical protein, conserved                             | -0,008078 | 0,9538 |
| TcCLB.510519.149 | hypothetical protein, conserved                             | -0,008138 | 0,9568 |
| TcCLB.510329.380 | hypothetical protein, conserved                             | -0,008247 | 0,9677 |
| TcCLB.508545.30  | hypothetical protein, conserved                             | -0,008424 | 0,9765 |
| TcCLB.508359.80  | mucin-associated surface protein (MASP), putative           | -0,008444 | 0,9917 |
| TcCLB.506177.130 | hypothetical protein, conserved                             | -0,008529 | 0,9765 |
| TcCLB.508657.10  | hypothetical protein, conserved                             | -0,008533 | 0,9647 |
| TcCLB.506929.40  | target SNARE, putative                                      | -0,008573 | 0,9617 |
| TcCLB.508577.160 | proteasome beta 6 subunit, putative                         | -0,008843 | 0,9487 |
| TcCLB.511907.300 | DNA repair and transcription factor protein, putative       | -0,008846 | 0,9594 |
| TcCLB.511771.60  | hypothetical protein                                        | -0,008849 | 0,9895 |
| TcCLB.508229.10  | trans-sialidase, putative                                   | -0,008863 | 0,9893 |
| TcCLB.510285.110 | hypothetical protein, conserved                             | -0,008883 | 0,9617 |

|                  |                                                           |           |        |
|------------------|-----------------------------------------------------------|-----------|--------|
| TcCLB.506513.100 | hypothetical protein, conserved                           | -0,008889 | 0,9485 |
| TcCLB.511285.80  | hypothetical protein                                      | -0,00897  | 0,9443 |
| TcCLB.503421.7   | N-acetyltransferase complex ARD1 subunit (pseudogene),    | -0,008979 | 0,9841 |
| TcCLB.507641.110 | hypothetical protein, conserved                           | -0,008988 | 0,9497 |
| TcCLB.508755.11  | trans-sialidase (pseudogene), putative                    | -0,008998 | 0,9761 |
| TcCLB.506605.30  | hypothetical protein, conserved                           | -0,009026 | 0,9638 |
| TcCLB.507611.199 | dispersed gene family protein 1 (DGF-1), putative         | -0,009037 | 0,9766 |
| TcCLB.509253.40  | hypothetical protein, conserved                           | -0,009088 | 0,9639 |
| TcCLB.508011.20  | mucin-associated surface protein (MASP, pseudogene), pu   | -0,009214 | 0,9922 |
| TcCLB.511071.20  | hypothetical protein, conserved                           | -0,00929  | 0,9692 |
| TcCLB.503649.10  | mucin-associated surface protein (MASP, pseudogene), pu   | -0,009321 | 0,9862 |
| TcCLB.510105.36  | hypothetical protein, conserved                           | -0,009338 | 0,9619 |
| TcCLB.510299.10  | hypothetical protein, conserved                           | -0,009345 | 0,9596 |
| TcCLB.508899.110 | actin-related protein 2, putative                         | -0,009346 | 0,9614 |
| TcCLB.511475.24  | dispersed gene family protein 1 (DGF-1), putative (fragme | -0,009361 | 0,975  |
| TcCLB.506295.200 | retrotransposon hot spot protein (RHS, pseudogene), putat | -0,009396 | 0,9576 |
| TcCLB.511173.120 | mucin-associated surface protein (MASP, pseudogene), pu   | -0,009466 | 0,979  |
| TcCLB.506933.46  | hypothetical protein, conserved                           | -0,009474 | 0,9675 |
| TcCLB.509875.30  | trans-sialidase (pseudogene), putative                    | -0,009474 | 0,9781 |
| TcCLB.506697.60  | hypothetical protein, conserved                           | -0,009491 | 0,9335 |
| TcCLB.510099.30  | hypothetical protein, conserved                           | -0,009503 | 0,9563 |
| TcCLB.503955.10  | mitochondrial DNA polymerase beta-PAK, putative           | -0,009801 | 0,963  |
| TcCLB.511657.60  | hypothetical protein, conserved                           | -0,00984  | 0,9371 |
| TcCLB.510431.260 | hypothetical protein, conserved                           | -0,009866 | 0,9568 |
| TcCLB.511277.160 | 60S ribosomal protein L10a, putative                      | -0,009904 | 0,8904 |
| TcCLB.506151.10  | hypothetical protein, conserved                           | -0,009913 | 0,9498 |
| TcCLB.505943.30  | hypothetical protein, conserved                           | -0,009956 | 0,9542 |
| TcCLB.508163.270 | mucin-associated surface protein (MASP), putative         | -0,009989 | 0,9833 |
| TcCLB.506187.80  | trans-sialidase (pseudogene), putative                    | -0,01007  | 0,9896 |
| TcCLB.504109.90  | cysteine peptidase, Clan CA, family C12, putative         | -0,01008  | 0,9568 |
| TcCLB.508175.340 | hypothetical protein, conserved                           | -0,0102   | 0,9337 |
| TcCLB.506559.484 | hypothetical protein, conserved                           | -0,01021  | 0,9674 |
| TcCLB.507811.50  | hypothetical protein, conserved                           | -0,01025  | 0,9538 |
| TcCLB.508707.320 | hypothetical protein, conserved                           | -0,01029  | 0,9452 |
| TcCLB.503971.20  | hypothetical protein, conserved                           | -0,01031  | 0,959  |
| TcCLB.506025.30  | hypothetical protein, conserved                           | -0,01034  | 0,9612 |
| TcCLB.508385.20  | hypothetical protein, conserved                           | -0,01035  | 0,9496 |
| TcCLB.509007.20  | hypothetical protein, conserved                           | -0,01037  | 0,9483 |
| TcCLB.510031.30  | hypothetical protein                                      | -0,01045  | 0,9461 |
| TcCLB.506213.100 | hypothetical protein, conserved                           | -0,01059  | 0,9495 |
| TcCLB.509267.6   | trans-sialidase (pseudogene), putative                    | -0,01063  | 0,9719 |
| TcCLB.506929.20  | hypothetical protein, conserved                           | -0,01071  | 0,9471 |
| TcCLB.503593.10  | eukaryotic translation initiation factor eIF-4E, putative | -0,01073  | 0,9416 |
| TcCLB.509201.15  | ribosomal protein S29, putative                           | -0,0109   | 0,951  |
| TcCLB.506287.150 | GTP-binding protein, putative                             | -0,01118  | 0,9432 |

|                  |                                                               |          |        |
|------------------|---------------------------------------------------------------|----------|--------|
| TcCLB.509125.20  | ATP-dependent Clp protease subunit, heat shock protein 78     | -0,01129 | 0,9325 |
| TcCLB.506211.220 | Associated kinase of Tb14-3-3, putative (AKB1)                | -0,01134 | 0,9315 |
| TcCLB.506389.60  | hypothetical protein, conserved                               | -0,01138 | 0,9491 |
| TcCLB.509551.100 | hypothetical protein, conserved                               | -0,01141 | 0,9495 |
| TcCLB.506961.20  | dispersed gene family protein 1 (DGF-1), putative             | -0,01141 | 0,9788 |
| TcCLB.505985.9   | calpain cysteine peptidase, putative (fragment)               | -0,01146 | 0,9495 |
| TcCLB.504575.15  | ubiquinol-cytochrome-C-reductase, putative                    | -0,01149 | 0,9777 |
| TcCLB.508355.130 | hypothetical protein, conserved                               | -0,0115  | 0,9406 |
| TcCLB.506457.50  | serine/threonine protein kinase, putative                     | -0,01151 | 0,9439 |
| TcCLB.511753.130 | U3 small nuclear ribonucleoprotein (snRNP), putative          | -0,01166 | 0,914  |
| TcCLB.506399.60  | hypothetical protein, conserved                               | -0,01191 | 0,9486 |
| TcCLB.506703.30  | mucin TcMUCII (pseudogene), putative                          | -0,01194 | 0,9844 |
| TcCLB.504099.30  | hypothetical protein, conserved (pseudogene)                  | -0,0121  | 0,9645 |
| TcCLB.507601.10  | phosphoprotein phosphatase, putative                          | -0,01213 | 0,9139 |
| TcCLB.510279.100 | hypothetical protein                                          | -0,01217 | 0,983  |
| TcCLB.509965.190 | DREV methyltransferase, putative                              | -0,01224 | 0,9421 |
| TcCLB.508461.90  | hypothetical protein, conserved                               | -0,01229 | 0,9416 |
| TcCLB.508667.30  | hypothetical protein, conserved                               | -0,01238 | 0,9452 |
| TcCLB.507041.50  | hypothetical protein, conserved                               | -0,01243 | 0,9625 |
| TcCLB.506203.120 | hypothetical protein, conserved                               | -0,01244 | 0,9064 |
| TcCLB.506979.20  | hypothetical protein, conserved                               | -0,01246 | 0,9603 |
| TcCLB.504029.90  | hypothetical protein, conserved                               | -0,01256 | 0,9493 |
| TcCLB.509551.30  | mitochondrial phosphate transporter, putative                 | -0,01259 | 0,9325 |
| TcCLB.509717.40  | hypothetical protein, conserved                               | -0,01263 | 0,9368 |
| TcCLB.507529.10  | hypothetical Zinc-finger containing protein                   | -0,01283 | 0,9471 |
| TcCLB.506503.40  | hypothetical protein, conserved                               | -0,01286 | 0,9536 |
| TcCLB.479517.30  | hypothetical protein                                          | -0,0129  | 0,9886 |
| TcCLB.507957.200 | mucin-associated surface protein (MASP), putative             | -0,01291 | 0,9851 |
| TcCLB.506469.120 | hypothetical protein, conserved                               | -0,01295 | 0,9452 |
| TcCLB.508265.40  | hypothetical protein, conserved                               | -0,01298 | 0,9335 |
| TcCLB.506511.20  | hypothetical protein, conserved                               | -0,01301 | 0,9399 |
| TcCLB.508265.70  | hypothetical protein, conserved                               | -0,01301 | 0,9538 |
| TcCLB.509897.132 | hypothetical protein, conserved (pseudogene)                  | -0,01317 | 0,9287 |
| TcCLB.506243.110 | expression site-associated gene (ESAG-like) protein, putative | -0,01325 | 0,973  |
| TcCLB.509733.70  | hypothetical protein, conserved                               | -0,01327 | 0,9312 |
| TcCLB.506297.310 | hypothetical protein, conserved                               | -0,01335 | 0,9291 |
| TcCLB.506351.35  | hypothetical protein, conserved                               | -0,01335 | 0,9663 |
| TcCLB.511837.110 | hypothetical protein, conserved                               | -0,01343 | 0,9266 |
| TcCLB.510257.130 | protein kinase, putative                                      | -0,0135  | 0,919  |
| TcCLB.507949.69  | DNA-directed RNA polymerase 2, RPB12 subunit, putative        | -0,01359 | 0,9463 |
| TcCLB.503811.80  | hypothetical protein, conserved                               | -0,01366 | 0,9383 |
| TcCLB.504109.30  | hypothetical protein, conserved                               | -0,01371 | 0,9171 |
| TcCLB.510729.80  | Mitochondrial import receptor subunit ATOM40, putative (      | -0,01386 | 0,9069 |
| TcCLB.508335.9   | dispersed gene family protein 1 (DGF-1), putative             | -0,01389 | 0,9642 |
| TcCLB.506955.198 | hypothetical protein                                          | -0,01392 | 0,969  |

|                  |                                                            |          |        |
|------------------|------------------------------------------------------------|----------|--------|
| TcCLB.506495.24  | hypothetical protein, conserved                            | -0,01394 | 0,9564 |
| TcCLB.505989.78  | hypothetical protein, conserved                            | -0,01397 | 0,9493 |
| TcCLB.510513.30  | Probable methyltransferase BTM2 homolog                    | -0,01413 | 0,9441 |
| TcCLB.504091.5   | hypothetical protein, conserved (fragment)                 | -0,01418 | 0,9817 |
| TcCLB.508331.41  | tryptophanyl-tRNA synthetase (pseudogene), putative        | -0,01423 | 0,9752 |
| TcCLB.503617.15  | U6 snRNA-associated Sm-like protein LSM3p                  | -0,01428 | 0,9678 |
| TcCLB.509755.10  | trans-sialidase, Group V, putative                         | -0,0144  | 0,9721 |
| TcCLB.506621.30  | ribonucleoside-diphosphate reductase small chain, putative | -0,01442 | 0,9121 |
| TcCLB.507511.71  | hypothetical protein (pseudogene)                          | -0,01443 | 0,9711 |
| TcCLB.508461.160 | hypothetical protein, conserved                            | -0,01444 | 0,9157 |
| TcCLB.511773.50  | protein kinase, putative                                   | -0,01462 | 0,9389 |
| TcCLB.507631.10  | hypothetical protein, conserved                            | -0,01469 | 0,9659 |
| TcCLB.506505.10  | hypothetical protein, conserved                            | -0,01473 | 0,9568 |
| TcCLB.507953.140 | trans-sialidase, Group V, putative                         | -0,01473 | 0,978  |
| TcCLB.504137.10  | isoleucyl-tRNA synthetase, putative                        | -0,01478 | 0,9301 |
| TcCLB.506479.110 | hypothetical protein                                       | -0,01499 | 0,9171 |
| TcCLB.508385.60  | hypothetical protein, conserved                            | -0,01514 | 0,939  |
| TcCLB.509231.20  | protein kinase, putative                                   | -0,01515 | 0,9326 |
| TcCLB.510351.130 | hypothetical protein, conserved                            | -0,01519 | 0,9419 |
| TcCLB.508273.40  | hypothetical protein, conserved                            | -0,01524 | 0,9317 |
| TcCLB.503565.10  | hypothetical protein                                       | -0,01533 | 0,9458 |
| TcCLB.510377.134 | mucin-associated surface protein (MASP), putative          | -0,01534 | 0,9809 |
| TcCLB.510747.150 | hypothetical protein, conserved                            | -0,01543 | 0,9261 |
| TcCLB.509967.90  | hypothetical protein, conserved                            | -0,01543 | 0,9361 |
| TcCLB.506931.40  | hypothetical protein, conserved                            | -0,01556 | 0,915  |
| TcCLB.503939.50  | hypothetical protein, conserved                            | -0,01559 | 0,903  |
| TcCLB.506221.30  | protein phosphatase 2C, putative                           | -0,01565 | 0,9211 |
| TcCLB.511303.20  | hypothetical protein                                       | -0,0157  | 0,9317 |
| TcCLB.508355.250 | 60S acidic ribosomal protein P0, putative (P0)             | -0,01582 | 0,8532 |
| TcCLB.510747.34  | hypothetical protein, conserved                            | -0,01584 | 0,9423 |
| TcCLB.509767.100 | hypothetical protein, conserved                            | -0,01596 | 0,9421 |
| TcCLB.511277.320 | hypothetical protein, conserved                            | -0,01599 | 0,8995 |
| TcCLB.508879.180 | hypothetical protein, conserved                            | -0,01602 | 0,9465 |
| TcCLB.508059.40  | syntaxin, putative                                         | -0,01604 | 0,943  |
| TcCLB.508199.90  | hypothetical protein, conserved                            | -0,01605 | 0,9257 |
| TcCLB.507669.100 | transcription elongation factor, putative                  | -0,01606 | 0,9243 |
| TcCLB.506949.50  | cytochrome c, putative                                     | -0,0161  | 0,9068 |
| TcCLB.507807.20  | hypothetical protein, conserved                            | -0,0161  | 0,9495 |
| TcCLB.509027.40  | hypothetical protein, conserved                            | -0,01615 | 0,8926 |
| TcCLB.426071.10  | dispersed gene family protein 1 (DGF-1), putative (fragme  | -0,01623 | 0,967  |
| TcCLB.507069.160 | trans-sialidase, Group V, putative                         | -0,01627 | 0,9656 |
| TcCLB.511923.40  | hypothetical protein, conserved (pseudogene)               | -0,01632 | 0,9619 |
| TcCLB.508179.40  | hypothetical protein, conserved                            | -0,01635 | 0,9156 |
| TcCLB.511505.20  | hypothetical protein, conserved                            | -0,01641 | 0,9253 |
| TcCLB.511209.40  | hypothetical protein, conserved                            | -0,01646 | 0,9392 |

|                  |                                                               |          |        |
|------------------|---------------------------------------------------------------|----------|--------|
| TcCLB.507729.41  | elongation factor 1-gamma (EF-1-gamma, pseudogene), p         | -0,01646 | 0,9784 |
| TcCLB.504047.40  | kinesin, putative                                             | -0,01651 | 0,8744 |
| TcCLB.508221.518 | mucin TcMUCII, putative                                       | -0,01651 | 0,9805 |
| TcCLB.505163.20  | hypothetical protein, conserved                               | -0,01657 | 0,9375 |
| TcCLB.510297.100 | ADP-ribosylation factor-like protein, putative                | -0,01664 | 0,9251 |
| TcCLB.506469.60  | hypothetical protein                                          | -0,01676 | 0,9591 |
| TcCLB.503985.10  | trans-sialidase (pseudogene), putative                        | -0,01685 | 0,9617 |
| TcCLB.511077.7   | trans-sialidase, putative (fragment)                          | -0,01694 | 0,9939 |
| TcCLB.503805.30  | hypothetical protein, conserved                               | -0,01695 | 0,9335 |
| TcCLB.506501.5   | trans-sialidase (pseudogene), putative                        | -0,01695 | 0,9801 |
| TcCLB.510515.120 | hypothetical protein, conserved                               | -0,01703 | 0,9656 |
| TcCLB.506529.650 | hypothetical protein, conserved                               | -0,01706 | 0,9161 |
| TcCLB.510011.9   | mucin-associated surface protein (MASP), putative             | -0,01727 | 0,9719 |
| TcCLB.511153.100 | RNA-binding protein, putative                                 | -0,01738 | 0,9146 |
| TcCLB.511257.30  | ras-related protein rab, putative                             | -0,0174  | 0,9406 |
| TcCLB.510105.250 | membrane-bound acid phosphatase 2, putative                   | -0,01748 | 0,9253 |
| TcCLB.510127.60  | hypothetical protein, conserved                               | -0,01748 | 0,9324 |
| TcCLB.509117.10  | ubiquitin-activating enzyme, putative                         | -0,01754 | 0,9287 |
| TcCLB.504883.40  | hypothetical protein, conserved                               | -0,01758 | 0,9006 |
| TcCLB.508371.10  | glutamine-dependent carbamoyl-phosphate synthetase (p         | -0,0176  | 0,9251 |
| TcCLB.509161.90  | hypothetical protein, conserved                               | -0,01761 | 0,9273 |
| TcCLB.511185.60  | trans-sialidase (pseudogene), putative                        | -0,01765 | 0,9614 |
| TcCLB.506863.40  | hypothetical protein, conserved                               | -0,01767 | 0,9453 |
| TcCLB.506245.76  | trans-sialidase (pseudogene), putative                        | -0,01768 | 0,9627 |
| TcCLB.506767.250 | trans-sialidase (pseudogene), putative                        | -0,01773 | 0,9702 |
| TcCLB.504313.30  | dispersed gene family protein 1 (DGF-1), putative             | -0,01783 | 0,9308 |
| TcCLB.508593.30  | hypothetical protein, conserved                               | -0,01792 | 0,9172 |
| TcCLB.508587.40  | dispersed gene family protein 1 (DGF-1, pseudogene), putative | -0,01802 | 0,9472 |
| TcCLB.507159.44  | DNA-directed RNA polymerase III subunit, putative             | -0,01817 | 0,9145 |
| TcCLB.511921.10  | hypothetical protein, conserved (pseudogene)                  | -0,0182  | 0,9581 |
| TcCLB.508209.150 | hypothetical protein, conserved                               | -0,01824 | 0,9049 |
| TcCLB.508779.50  | hypothetical protein, conserved                               | -0,01829 | 0,8995 |
| TcCLB.509589.50  | hypothetical protein, conserved                               | -0,01832 | 0,898  |
| TcCLB.509617.60  | thioredoxin, putative                                         | -0,01834 | 0,9385 |
| TcCLB.507793.60  | hypothetical protein, conserved                               | -0,01837 | 0,9567 |
| TcCLB.503899.70  | hypothetical protein                                          | -0,01845 | 0,9299 |
| TcCLB.509937.130 | protein kinase, putative                                      | -0,01849 | 0,9812 |
| TcCLB.504161.50  | hypothetical protein, conserved                               | -0,01859 | 0,9233 |
| TcCLB.509217.160 | complement regulatory protein, putative                       | -0,01869 | 0,9634 |
| TcCLB.508321.40  | hypothetical protein, conserved                               | -0,01874 | 0,8496 |
| TcCLB.511059.10  | trans-sialidase, putative                                     | -0,01874 | 0,9806 |
| TcCLB.509887.10  | hypothetical protein                                          | -0,01876 | 0,943  |
| TcCLB.503687.10  | regulator of chromosome condensation (RCC1), putative         | -0,01888 | 0,9176 |
| TcCLB.506331.139 | mucin-associated surface protein (MASP, pseudogene), putative | -0,01891 | 0,9469 |
| TcCLB.506247.290 | hypothetical protein, conserved                               | -0,01895 | 0,8661 |

|                  |                                                            |          |        |
|------------------|------------------------------------------------------------|----------|--------|
| TcCLB.506507.60  | retrotransposon hot spot protein (RHS, pseudogene), putat  | -0,019   | 0,9203 |
| TcCLB.509781.10  | hypothetical protein, conserved                            | -0,01906 | 0,9341 |
| TcCLB.507987.30  | mucin-associated surface protein (MASP), putative (fragm   | -0,01907 | 0,9719 |
| TcCLB.503609.50  | trans-sialidase, Group VI, putative                        | -0,01913 | 0,9602 |
| TcCLB.508081.20  | hypothetical protein                                       | -0,01924 | 0,9762 |
| TcCLB.504017.40  | aminomethyltransferase, mitochondrial, putative (GCV)      | -0,01949 | 0,9229 |
| TcCLB.507811.44  | phosphoglycerate mutase protein, putative                  | -0,01964 | 0,9368 |
| TcCLB.510655.80  | hypothetical protein, conserved                            | -0,01972 | 0,9491 |
| TcCLB.510371.70  | mucin-associated surface protein (MASP), putative          | -0,01972 | 0,9665 |
| TcCLB.511383.20  | kinesin, putative                                          | -0,01979 | 0,8963 |
| TcCLB.507757.60  | dihydrolipoamide dehydrogenase, putative                   | -0,02002 | 0,9203 |
| TcCLB.511137.10  | hypothetical protein, conserved                            | -0,02003 | 0,9314 |
| TcCLB.509803.30  | hypothetical protein, conserved                            | -0,02006 | 0,8927 |
| TcCLB.503897.50  | hypothetical protein, conserved                            | -0,02006 | 0,9006 |
| TcCLB.503851.10  | Elongator-like Protein 3a, putative                        | -0,02007 | 0,9249 |
| TcCLB.509911.100 | chaperone DNAJ protein, putative                           | -0,02014 | 0,9173 |
| TcCLB.511867.180 | hypothetical protein, conserved                            | -0,02018 | 0,9102 |
| TcCLB.511747.20  | hypothetical protein, conserved                            | -0,02018 | 0,9114 |
| TcCLB.510205.20  | mucin-associated surface protein (MASP), putative          | -0,02023 | 0,9614 |
| TcCLB.510089.110 | mitochondrial RNA binding complex 1 subunit, putative      | -0,02036 | 0,8958 |
| TcCLB.508963.20  | small GTP-binding protein Rab18, putative                  | -0,02047 | 0,9125 |
| TcCLB.511907.10  | hypothetical protein, conserved                            | -0,02049 | 0,9071 |
| TcCLB.504625.10  | trans-splicing factor, putative                            | -0,02064 | 0,9075 |
| TcCLB.506941.250 | hypothetical protein, conserved                            | -0,02065 | 0,9012 |
| TcCLB.510741.180 | ATP-dependent RNA helicase, putative                       | -0,02074 | 0,8411 |
| TcCLB.511925.40  | hypothetical protein, conserved                            | -0,02087 | 0,9452 |
| TcCLB.510295.15  | hypothetical protein, conserved                            | -0,02088 | 0,9103 |
| TcCLB.507215.9   | dispersed gene family protein 1 (DGF-1), putative (fragme  | -0,02095 | 0,9702 |
| TcCLB.508825.20  | hypothetical protein                                       | -0,02099 | 0,9293 |
| TcCLB.506303.50  | UDP-galactose 4-epimerase, putative                        | -0,02101 | 0,8937 |
| TcCLB.508065.10  | UDP-Gal or UDP-GlcNAc-dependent glycosyltransferase, pi    | -0,02103 | 0,9499 |
| TcCLB.511287.80  | hypothetical protein, conserved                            | -0,02109 | 0,9197 |
| TcCLB.508165.410 | mucin-associated surface protein (MASP), putative          | -0,02128 | 0,9639 |
| TcCLB.511929.40  | trans-sialidase (pseudogene), putative                     | -0,02133 | 0,9617 |
| TcCLB.509065.120 | hypothetical protein                                       | -0,02135 | 0,9296 |
| TcCLB.508815.70  | hypothetical protein, conserved                            | -0,02141 | 0,8345 |
| TcCLB.503657.20  | hypothetical protein, conserved                            | -0,02144 | 0,9141 |
| TcCLB.509059.80  | hypothetical protein, conserved                            | -0,02148 | 0,8725 |
| TcCLB.509767.10  | neutral sphingomyelinase activation associated factor-like | -0,02159 | 0,8769 |
| TcCLB.503563.20  | ADG2, putative                                             | -0,02182 | 0,9042 |
| TcCLB.506869.4   | hypothetical protein, conserved                            | -0,02195 | 0,9005 |
| TcCLB.503879.100 | hypothetical protein, conserved                            | -0,02196 | 0,819  |
| TcCLB.507609.70  | hypothetical protein, conserved                            | -0,02216 | 0,9363 |
| TcCLB.511747.30  | hypothetical protein, conserved                            | -0,02218 | 0,9251 |
| TcCLB.506871.130 | hypothetical protein, conserved                            | -0,02222 | 0,8924 |

|                  |                                                           |          |        |
|------------------|-----------------------------------------------------------|----------|--------|
| TcCLB.506173.20  | hypothetical protein                                      | -0,02225 | 0,9189 |
| TcCLB.506765.58  | trans-sialidase (pseudogene), putative                    | -0,02226 | 0,9609 |
| TcCLB.509999.30  | hypothetical protein, conserved                           | -0,02232 | 0,9125 |
| TcCLB.508085.10  | GMP synthase, putative                                    | -0,02235 | 0,8906 |
| TcCLB.511797.240 | trans-sialidase (pseudogene), putative                    | -0,02238 | 0,9522 |
| TcCLB.506859.80  | hypothetical protein, conserved                           | -0,0225  | 0,8629 |
| TcCLB.505025.110 | surface protease GP63 (pseudogene), putative              | -0,02252 | 0,9617 |
| TcCLB.504109.70  | mitochondrial carrier protein, putative                   | -0,02261 | 0,8608 |
| TcCLB.509647.190 | hypothetical protein, conserved                           | -0,02266 | 0,8667 |
| TcCLB.508735.10  | trans-sialidase (pseudogene), putative                    | -0,02268 | 0,91   |
| TcCLB.505965.80  | hypothetical protein, conserved                           | -0,02269 | 0,9148 |
| TcCLB.509561.120 | deaminase, putative                                       | -0,02275 | 0,928  |
| TcCLB.510745.10  | hypothetical protein, conserved                           | -0,02279 | 0,8948 |
| TcCLB.507583.30  | hypothetical protein                                      | -0,0228  | 0,9091 |
| TcCLB.510355.250 | hypothetical protein, conserved                           | -0,02288 | 0,8597 |
| TcCLB.506195.150 | hypothetical protein, conserved                           | -0,02302 | 0,8619 |
| TcCLB.506527.10  | hypothetical protein, conserved                           | -0,02327 | 0,8389 |
| TcCLB.509037.50  | aspartyl-tRNA synthetase, putative                        | -0,02333 | 0,8706 |
| TcCLB.507527.10  | hypothetical protein, conserved                           | -0,02334 | 0,8887 |
| TcCLB.507591.20  | beta galactofuranosyl glycosyltransferase (pseudogene), p | -0,02337 | 0,939  |
| TcCLB.511625.74  | hypothetical protein, conserved                           | -0,02343 | 0,8662 |
| TcCLB.506205.30  | hypothetical protein, conserved                           | -0,02349 | 0,9128 |
| TcCLB.510105.184 | hypothetical protein, conserved                           | -0,02351 | 0,917  |
| TcCLB.507793.50  | hypothetical protein, conserved                           | -0,02365 | 0,9394 |
| TcCLB.473755.9   | hypothetical protein, conserved                           | -0,02366 | 0,8912 |
| TcCLB.511825.110 | hypothetical protein                                      | -0,0237  | 0,9683 |
| TcCLB.504051.40  | hypothetical protein, conserved                           | -0,02372 | 0,8631 |
| TcCLB.511923.130 | hypothetical protein, conserved                           | -0,02383 | 0,8895 |
| TcCLB.507069.139 | mucin TcMUCII (pseudogene), putative                      | -0,02391 | 0,9673 |
| TcCLB.508921.10  | hypothetical protein, conserved                           | -0,02399 | 0,9134 |
| TcCLB.503835.20  | hypothetical protein, conserved                           | -0,02402 | 0,9068 |
| TcCLB.507001.40  | hypothetical protein, conserved                           | -0,02406 | 0,8717 |
| TcCLB.503833.30  | peroxin 13, putative (PEX13)                              | -0,02415 | 0,883  |
| TcCLB.506321.350 | hypothetical protein, conserved                           | -0,02415 | 0,9075 |
| TcCLB.508741.190 | hypothetical protein, conserved                           | -0,02423 | 0,8759 |
| TcCLB.507011.260 | hypothetical protein, conserved                           | -0,02425 | 0,8831 |
| TcCLB.511719.20  | hypothetical protein, conserved                           | -0,02425 | 0,9093 |
| TcCLB.504881.30  | hypothetical protein, conserved                           | -0,02433 | 0,7653 |
| TcCLB.504427.30  | hypothetical protein, conserved                           | -0,02437 | 0,8587 |
| TcCLB.506789.110 | hypothetical protein                                      | -0,02442 | 0,854  |
| TcCLB.511025.30  | mitogen-activated protein kinase, putative                | -0,02442 | 0,873  |
| TcCLB.511923.71  | hypothetical protein, conserved (pseudogene)              | -0,02442 | 0,9522 |
| TcCLB.509539.44  | hypothetical protein, conserved                           | -0,02444 | 0,9503 |
| TcCLB.506411.39  | CDP-DAG synthase, putative (fragment) (CDS)               | -0,02448 | 0,9483 |
| TcCLB.509633.40  | hypothetical protein, conserved                           | -0,02455 | 0,913  |

|                  |                                                           |          |        |
|------------------|-----------------------------------------------------------|----------|--------|
| TcCLB.504021.10  | G1 cyclin CycE4, putative (CYC5)                          | -0,02459 | 0,8372 |
| TcCLB.511851.44  | mucin-associated surface protein (MASP, pseudogene), pu   | -0,02459 | 0,8402 |
| TcCLB.503985.20  | retrotransposon hot spot protein (RHS, pseudogene), putat | -0,0246  | 0,9409 |
| TcCLB.506277.20  | mucin TcMUCII (pseudogene), putative                      | -0,0246  | 0,9708 |
| TcCLB.509915.80  | hypothetical protein, conserved (pseudogene)              | -0,02464 | 0,9335 |
| TcCLB.508355.280 | hypothetical protein, conserved                           | -0,02465 | 0,8564 |
| TcCLB.510437.45  | hypothetical protein                                      | -0,02474 | 0,9137 |
| TcCLB.504741.110 | hypothetical protein, conserved                           | -0,02478 | 0,9091 |
| TcCLB.506529.460 | hypothetical protein, conserved                           | -0,02481 | 0,8669 |
| TcCLB.511183.391 | surface protease GP63 (pseudogene), putative              | -0,02482 | 0,9495 |
| TcCLB.511477.40  | dispersed gene family protein 1 (DGF-1, pseudogene), puta | -0,02483 | 0,9242 |
| TcCLB.510921.40  | trans-sialidase, putative (fragment)                      | -0,02492 | 0,9615 |
| TcCLB.506989.155 | hypothetical protein, conserved                           | -0,02493 | 0,9203 |
| TcCLB.508917.4   | hypothetical protein, conserved                           | -0,02505 | 0,8922 |
| TcCLB.508827.110 | leucine-rich repeat protein (LRRP), putative              | -0,02507 | 0,8934 |
| TcCLB.508781.10  | structural maintenance of chromosome protein 4 (pseudogē  | -0,02515 | 0,9346 |
| TcCLB.506343.10  | serine/threonine protein kinase, putative                 | -0,0252  | 0,9139 |
| TcCLB.509455.90  | Putative intraflagellar transport protein A1 (PIFTA1)     | -0,02522 | 0,8491 |
| TcCLB.509543.10  | hypothetical protein                                      | -0,02525 | 0,951  |
| TcCLB.511653.40  | hypothetical protein, conserved                           | -0,02551 | 0,902  |
| TcCLB.511003.200 | hypothetical protein, conserved                           | -0,02562 | 0,9163 |
| TcCLB.507991.30  | hypothetical protein, conserved                           | -0,0258  | 0,8946 |
| TcCLB.511737.50  | hypothetical protein, conserved                           | -0,0258  | 0,9016 |
| TcCLB.505941.30  | hypothetical protein, conserved                           | -0,02582 | 0,8507 |
| TcCLB.507073.30  | hypothetical protein, conserved                           | -0,02584 | 0,8253 |
| TcCLB.509505.80  | hypothetical protein, conserved                           | -0,02595 | 0,8761 |
| TcCLB.506703.20  | mucin-associated surface protein (MASP), putative         | -0,02616 | 0,965  |
| TcCLB.506297.220 | hypothetical protein, conserved                           | -0,02619 | 0,8111 |
| TcCLB.509157.100 | hypothetical protein                                      | -0,02632 | 0,9128 |
| TcCLB.506475.120 | conserved protein, unknown function                       | -0,02633 | 0,8729 |
| TcCLB.506919.110 | glycine dehydrogenase [decarboxylating] (pseudogene), pu  | -0,02633 | 0,9606 |
| TcCLB.510755.129 | 60S ribosomal protein L12, putative                       | -0,02636 | 0,9114 |
| TcCLB.509671.64  | ribosomal protein L36, putative                           | -0,02641 | 0,8605 |
| TcCLB.507071.390 | trans-sialidase, Group V, putative                        | -0,02654 | 0,9581 |
| TcCLB.508965.39  | hypothetical protein, conserved                           | -0,02655 | 0,8552 |
| TcCLB.508265.44  | mitochondrial pyruvate carrier protein 2, putative        | -0,02668 | 0,8766 |
| TcCLB.510967.16  | hypothetical protein, conserved                           | -0,02673 | 0,8796 |
| TcCLB.506379.10  | UDP-Gal or UDP-GlcNAc-dependent glycosyltransferase, pu   | -0,02678 | 0,9427 |
| TcCLB.511173.460 | mucin-associated surface protein (MASP), putative         | -0,0268  | 0,9618 |
| TcCLB.508871.160 | hypothetical protein                                      | -0,0268  | 0,9675 |
| TcCLB.504835.29  | hypothetical protein, conserved                           | -0,02681 | 0,8455 |
| TcCLB.507681.70  | hypothetical protein, conserved                           | -0,02689 | 0,8538 |
| TcCLB.507747.220 | protein farnesyltransferase, putative                     | -0,02691 | 0,8636 |
| TcCLB.511215.50  | hypothetical protein, conserved                           | -0,02697 | 0,8348 |
| TcCLB.510603.119 | hypothetical protein, conserved                           | -0,02704 | 0,9278 |



|                  |                                                           |          |        |
|------------------|-----------------------------------------------------------|----------|--------|
| TcCLB.506357.190 | hypothetical protein, conserved                           | -0,02708 | 0,8685 |
| TcCLB.508707.130 | hypothetical protein, conserved                           | -0,02708 | 0,8711 |
| TcCLB.505999.150 | wd40 repeat domain-containing protein                     | -0,0271  | 0,8766 |
| TcCLB.511803.30  | hypothetical protein, conserved                           | -0,02719 | 0,8858 |
| TcCLB.506967.10  | trans-sialidase, Group V, putative                        | -0,02722 | 0,9508 |
| TcCLB.503717.40  | mucin-associated surface protein (MASP, pseudogene), pu   | -0,02731 | 0,9461 |
| TcCLB.506201.4   | hypothetical protein, conserved                           | -0,0274  | 0,9093 |
| TcCLB.506477.4   | hypothetical protein, conserved                           | -0,02747 | 0,9275 |
| TcCLB.507993.20  | hypothetical protein, conserved                           | -0,0276  | 0,9325 |
| TcCLB.504449.30  | hypothetical protein, conserved                           | -0,02761 | 0,79   |
| TcCLB.507093.339 | hypothetical protein, conserved                           | -0,02763 | 0,8575 |
| TcCLB.507089.140 | hypothetical protein, conserved                           | -0,02765 | 0,8492 |
| TcCLB.506767.381 | syntaxin binding protein (pseudogene), putative           | -0,02767 | 0,9663 |
| TcCLB.509595.30  | hypothetical protein, conserved                           | -0,02773 | 0,8688 |
| TcCLB.506469.110 | hypothetical protein                                      | -0,0282  | 0,8994 |
| TcCLB.506713.14  | hypothetical protein, conserved                           | -0,02837 | 0,9055 |
| TcCLB.504011.70  | hypothetical protein, conserved                           | -0,02841 | 0,9329 |
| TcCLB.509805.160 | hypothetical protein, conserved                           | -0,02844 | 0,8336 |
| TcCLB.510437.50  | hypothetical protein, conserved                           | -0,02845 | 0,8722 |
| TcCLB.511239.130 | hypothetical protein, conserved                           | -0,0285  | 0,8908 |
| TcCLB.506203.100 | hypothetical protein                                      | -0,02861 | 0,8499 |
| TcCLB.503925.70  | hypothetical protein, conserved                           | -0,02863 | 0,7998 |
| TcCLB.509541.19  | major vault protein, putative                             | -0,02879 | 0,8252 |
| TcCLB.508405.110 | hypothetical protein, conserved                           | -0,02886 | 0,8739 |
| TcCLB.507991.80  | hypothetical protein, conserved                           | -0,029   | 0,8275 |
| TcCLB.507521.140 | hypothetical protein, conserved                           | -0,02904 | 0,8085 |
| TcCLB.511621.244 | hypothetical protein, conserved                           | -0,02904 | 0,904  |
| TcCLB.507521.130 | hypothetical protein                                      | -0,02912 | 0,8011 |
| TcCLB.511127.50  | hypothetical protein, conserved                           | -0,02912 | 0,8649 |
| TcCLB.511815.150 | hypothetical protein                                      | -0,02913 | 0,7761 |
| TcCLB.508559.80  | trans-sialidase (pseudogene), putative                    | -0,02913 | 0,9213 |
| TcCLB.511239.10  | hypothetical protein, conserved                           | -0,02914 | 0,8653 |
| TcCLB.509867.50  | hypothetical protein, conserved (pseudogene)              | -0,02916 | 0,9471 |
| TcCLB.511221.60  | trans-sialidase, Group V, putative                        | -0,02919 | 0,9193 |
| TcCLB.504105.170 | hypothetical protein, conserved                           | -0,02926 | 0,7939 |
| TcCLB.504017.20  | hypothetical protein, conserved                           | -0,02938 | 0,8434 |
| TcCLB.507747.240 | hypothetical protein, conserved                           | -0,02956 | 0,8419 |
| TcCLB.511139.30  | hypothetical protein, conserved                           | -0,0296  | 0,8643 |
| TcCLB.506437.10  | amastin, putative                                         | -0,0296  | 0,8826 |
| TcCLB.506367.130 | hypothetical protein, conserved                           | -0,02975 | 0,845  |
| TcCLB.506853.20  | hypothetical protein, conserved                           | -0,02976 | 0,8259 |
| TcCLB.511587.40  | hypothetical protein, conserved (pseudogene)              | -0,02997 | 0,8061 |
| TcCLB.509485.70  | retrotransposon hot spot protein (RHS, pseudogene), putat | -0,03001 | 0,8749 |
| TcCLB.506811.110 | hypothetical protein, conserved                           | -0,03008 | 0,8238 |
| TcCLB.503651.20  | hypothetical protein                                      | -0,03014 | 0,87   |

|                  |                                                               |          |        |
|------------------|---------------------------------------------------------------|----------|--------|
| TcCLB.511797.184 | mucin TcMUC (pseudogene), putative                            | -0,03022 | 0,9656 |
| TcCLB.506227.250 | hypothetical protein, conserved                               | -0,03038 | 0,8439 |
| TcCLB.508153.350 | hypothetical protein, conserved                               | -0,03046 | 0,8934 |
| TcCLB.510655.40  | hypothetical protein, conserved                               | -0,03047 | 0,8422 |
| TcCLB.504175.30  | hypothetical protein, conserved                               | -0,03049 | 0,8671 |
| TcCLB.506767.140 | mucin-associated surface protein (MASP), putative             | -0,03052 | 0,9599 |
| TcCLB.511283.280 | Serine/threonine-protein kinase Nek1-related, putative        | -0,03059 | 0,8337 |
| TcCLB.508771.30  | hypothetical protein, conserved                               | -0,03059 | 0,8773 |
| TcCLB.506635.110 | kinesin-like protein, putative                                | -0,03061 | 0,8816 |
| TcCLB.510663.10  | hypothetical protein, conserved                               | -0,03073 | 0,9122 |
| TcCLB.506855.209 | U6 snRNA-associated Sm-like protein LSm7p                     | -0,03075 | 0,879  |
| TcCLB.508741.10  | hypothetical protein                                          | -0,03077 | 0,8086 |
| TcCLB.511421.230 | Cell cycle checkpoint protein RAD1-like, putative             | -0,03088 | 0,8504 |
| TcCLB.510965.29  | hypothetical protein, conserved                               | -0,03089 | 0,8779 |
| TcCLB.508507.20  | hypothetical protein, conserved                               | -0,03095 | 0,8561 |
| TcCLB.510625.140 | elongation factor 1-gamma (EF-1-gamma), putative              | -0,03101 | 0,8657 |
| TcCLB.511237.80  | hypothetical protein, conserved                               | -0,0311  | 0,8346 |
| TcCLB.506211.100 | Sarcalumenin, putative                                        | -0,03113 | 0,8209 |
| TcCLB.511727.140 | phenylalanyl-tRNA synthetase alpha chain, putative            | -0,03115 | 0,7267 |
| TcCLB.509747.20  | 60S ribosomal protein L22, putative                           | -0,03122 | 0,7571 |
| TcCLB.503673.9   | eukaryotic translation initiation factor 2-alpha kinase, puta | -0,03125 | 0,8854 |
| TcCLB.511451.90  | mucin-associated surface protein (MASP), putative             | -0,03129 | 0,9542 |
| TcCLB.506959.120 | 60S ribosomal protein L30, putative                           | -0,03144 | 0,7612 |
| TcCLB.509227.20  | mucin-associated surface protein (MASP, pseudogene), pu       | -0,03144 | 0,7966 |
| TcCLB.504013.55  | hypothetical protein, conserved                               | -0,03156 | 0,8784 |
| TcCLB.506513.80  | hypothetical protein, conserved                               | -0,03159 | 0,8552 |
| TcCLB.506241.100 | 60S ribosomal protein L32, putative                           | -0,0316  | 0,7521 |
| TcCLB.508541.30  | hypothetical protein                                          | -0,03165 | 0,9647 |
| TcCLB.510761.18  | hypothetical protein, conserved                               | -0,0317  | 0,834  |
| TcCLB.510149.70  | hypothetical protein, conserved                               | -0,03173 | 0,7844 |
| TcCLB.511545.60  | hypothetical protein                                          | -0,03173 | 0,919  |
| TcCLB.509693.170 | hypothetical protein, conserved                               | -0,03182 | 0,8496 |
| TcCLB.509081.140 | mucin TcMUCII, putative                                       | -0,03184 | 0,9536 |
| TcCLB.506241.30  | trans-sialidase, Group II, putative                           | -0,03192 | 0,9171 |
| TcCLB.509917.12  | N-acetyltransferase complex ARD1 subunit (pseudogene),        | -0,03192 | 0,9485 |
| TcCLB.504081.310 | syntaxin binding protein (pseudogene), putative               | -0,03208 | 0,9536 |
| TcCLB.510971.69  | hypothetical protein, conserved (fragment)                    | -0,03217 | 0,8132 |
| TcCLB.507687.20  | dispersed gene family protein 1 (DGF-1), putative             | -0,03238 | 0,919  |
| TcCLB.511303.160 | sodium/hydrogen exchanger, putative (FTP)                     | -0,03249 | 0,8465 |
| TcCLB.503995.30  | hypothetical protein                                          | -0,03264 | 0,8895 |
| TcCLB.506155.30  | kinesin-like protein, putative                                | -0,03269 | 0,8074 |
| TcCLB.507787.20  | hypothetical protein, conserved                               | -0,03279 | 0,7876 |
| TcCLB.511445.100 | hypothetical protein, conserved                               | -0,03285 | 0,8061 |
| TcCLB.508277.30  | hypothetical protein, conserved                               | -0,03286 | 0,815  |
| TcCLB.508641.80  | hypothetical protein, conserved                               | -0,03292 | 0,8345 |

|                  |                                                              |          |        |
|------------------|--------------------------------------------------------------|----------|--------|
| TcCLB.506239.50  | palmitoyl acyltransferase 6, putative                        | -0,03294 | 0,8769 |
| TcCLB.511529.160 | enoyl-CoA hydratase/isomerase family protein, putative       | -0,03313 | 0,8086 |
| TcCLB.509817.40  | trans-sialidase (pseudogene), putative                       | -0,0332  | 0,884  |
| TcCLB.503813.10  | hypothetical protein, conserved                              | -0,03328 | 0,82   |
| TcCLB.511517.20  | hypothetical protein, conserved                              | -0,0333  | 0,8256 |
| TcCLB.506717.100 | mucin-associated surface protein (MASP, pseudogene), pu      | -0,03339 | 0,8974 |
| TcCLB.510213.20  | hypothetical protein                                         | -0,03355 | 0,9639 |
| TcCLB.505171.10  | phospholipid transporting ATPase-like protein, putative      | -0,03361 | 0,832  |
| TcCLB.510819.90  | hypothetical protein, conserved                              | -0,03363 | 0,8609 |
| TcCLB.510797.10  | 2-oxoglutarate dehydrogenase subunit, putative               | -0,03383 | 0,8285 |
| TcCLB.509109.145 | hypothetical protein, conserved (pseudogene)                 | -0,03407 | 0,9    |
| TcCLB.507605.26  | mucin TcMUCII, putative                                      | -0,03418 | 0,9747 |
| TcCLB.508645.10  | SNF2 family protein                                          | -0,03419 | 0,7934 |
| TcCLB.508507.50  | hypothetical protein, conserved                              | -0,0342  | 0,8799 |
| TcCLB.452039.9   | hypothetical protein, conserved                              | -0,03427 | 0,79   |
| TcCLB.509807.29  | hypothetical protein, conserved                              | -0,03427 | 0,8752 |
| TcCLB.507031.50  | hypothetical protein, conserved                              | -0,03427 | 0,9091 |
| TcCLB.511127.100 | catalytic subunit of the vacuolar transporter chaperone 4, Ꞥ | -0,03435 | 0,777  |
| TcCLB.506835.30  | 60S ribosomal protein L9, putative                           | -0,03436 | 0,6953 |
| TcCLB.506979.5   | hypothetical protein, conserved (pseudogene)                 | -0,03439 | 0,9306 |
| TcCLB.447135.10  | surface protease GP63, putative                              | -0,03453 | 0,9636 |
| TcCLB.506193.20  | hypothetical protein, conserved                              | -0,03456 | 0,8297 |
| TcCLB.507997.80  | hypothetical protein, conserved                              | -0,03456 | 0,9139 |
| TcCLB.508461.589 | hypothetical protein, conserved (fragment)                   | -0,03462 | 0,9093 |
| TcCLB.508317.40  | hypothetical protein, conserved                              | -0,03464 | 0,876  |
| TcCLB.505071.119 | hypothetical protein, conserved                              | -0,0347  | 0,854  |
| TcCLB.506413.70  | hypothetical protein, conserved                              | -0,03482 | 0,8268 |
| TcCLB.503829.89  | spliceosomal U5 snRNP-specific protein, putative             | -0,03488 | 0,8928 |
| TcCLB.510603.150 | hypothetical protein, conserved                              | -0,03492 | 0,8589 |
| TcCLB.507087.70  | hypothetical protein, conserved                              | -0,03501 | 0,7993 |
| TcCLB.508075.20  | DNA repair protein, putative                                 | -0,0351  | 0,8358 |
| TcCLB.504051.9   | hypothetical protein, conserved                              | -0,03516 | 0,8622 |
| TcCLB.506887.60  | small nuclear RNA gene activation protein (SNAP) 50, puta    | -0,03519 | 0,7708 |
| TcCLB.506685.40  | hypothetical protein, conserved                              | -0,0354  | 0,807  |
| TcCLB.507585.10  | amino acid transporter, putative                             | -0,03544 | 0,6349 |
| TcCLB.506807.30  | hypothetical protein, conserved                              | -0,03546 | 0,8711 |
| TcCLB.506675.70  | dispersed gene family protein 1 (DGF-1), putative            | -0,03552 | 0,8943 |
| TcCLB.506689.20  | hypothetical protein, conserved (pseudogene)                 | -0,03554 | 0,8535 |
| TcCLB.508325.180 | retrotransposon hot spot protein (RHS, pseudogene), putat    | -0,03566 | 0,8078 |
| TcCLB.509201.10  | hypothetical protein, conserved                              | -0,03569 | 0,7984 |
| TcCLB.511737.40  | hypothetical protein, conserved                              | -0,03586 | 0,8175 |
| TcCLB.507519.180 | hypothetical protein, conserved                              | -0,03595 | 0,8473 |
| TcCLB.418185.46  | N-acetyltransferase complex ARD1 subunit (pseudogene),       | -0,03606 | 0,9301 |
| TcCLB.509715.120 | phosphatidylinositol-4-phosphate 5-kinase, putative          | -0,0362  | 0,8135 |
| TcCLB.511649.110 | hypothetical protein, conserved                              | -0,03631 | 0,7876 |

|                  |                                                               |          |        |
|------------------|---------------------------------------------------------------|----------|--------|
| TcCLB.511907.250 | hypothetical protein                                          | -0,03644 | 0,7721 |
| TcCLB.506251.120 | hypothetical protein, conserved                               | -0,03646 | 0,88   |
| TcCLB.506951.10  | retrotransposon hot spot protein (RHS, pseudogene), putat     | -0,03647 | 0,9296 |
| TcCLB.510735.20  | hypothetical protein, conserved                               | -0,03657 | 0,8355 |
| TcCLB.504153.260 | hypothetical protein, conserved                               | -0,0366  | 0,7462 |
| TcCLB.507625.80  | hypothetical protein, conserved                               | -0,03665 | 0,8092 |
| TcCLB.504159.109 | hypothetical protein, conserved                               | -0,03665 | 0,8859 |
| TcCLB.510091.110 | mitochondrial RNA binding complex 1 subunit, putative         | -0,03679 | 0,82   |
| TcCLB.510231.10  | eukaryotic translation initiation factor 2-alpha kinase, puta | -0,03686 | 0,8438 |
| TcCLB.510543.200 | trans-sialidase (pseudogene), putative                        | -0,03697 | 0,9347 |
| TcCLB.507739.70  | hypothetical protein, conserved                               | -0,037   | 0,7985 |
| TcCLB.506247.210 | hypothetical protein, conserved                               | -0,03708 | 0,671  |
| TcCLB.510421.130 | mitochondrial RNA binding complex 1 subunit, putative         | -0,03726 | 0,789  |
| TcCLB.511255.470 | retrotransposon hot spot protein (RHS, pseudogene), putat     | -0,03738 | 0,922  |
| TcCLB.507687.30  | retrotransposon hot spot protein (RHS, pseudogene), putat     | -0,03748 | 0,8668 |
| TcCLB.506559.364 | hypothetical protein, conserved                               | -0,0375  | 0,7006 |
| TcCLB.506763.130 | mucin-associated surface protein (MASP), putative             | -0,03751 | 0,9346 |
| TcCLB.510295.40  | Protein C21orf2 homolog, putative                             | -0,03756 | 0,8181 |
| TcCLB.509235.10  | UDP-Gal or UDP-GlcNAc-dependent glycosyltransferase, pi       | -0,03793 | 0,9051 |
| TcCLB.416143.10  | Lys-63-specific deubiquitinase BRCC36, putative               | -0,03794 | 0,7858 |
| TcCLB.503635.40  | hypothetical protein                                          | -0,03803 | 0,8171 |
| TcCLB.507681.180 | hypothetical protein, conserved                               | -0,03803 | 0,8176 |
| TcCLB.503987.39  | hypothetical protein, conserved                               | -0,03822 | 0,8784 |
| TcCLB.508899.80  | hypothetical protein, conserved                               | -0,0383  | 0,7861 |
| TcCLB.504125.80  | hypothetical protein, conserved                               | -0,03836 | 0,7765 |
| TcCLB.511881.20  | serine/threonine-protein phosphatase                          | -0,03842 | 0,8254 |
| TcCLB.511671.70  | glucosamine 6-phosphate n-acetyltransferase, putative         | -0,03846 | 0,8661 |
| TcCLB.503967.19  | hypothetical protein                                          | -0,03857 | 0,8897 |
| TcCLB.507011.40  | hypothetical protein, conserved                               | -0,03861 | 0,8052 |
| TcCLB.509795.60  | tRNA pseudouridine synthase TruD, putative                    | -0,03863 | 0,7915 |
| TcCLB.511837.60  | hypothetical protein, conserved                               | -0,03863 | 0,8118 |
| TcCLB.509213.20  | hypothetical protein, conserved                               | -0,03863 | 0,8465 |
| TcCLB.511215.100 | hypothetical protein                                          | -0,03869 | 0,8783 |
| TcCLB.508871.170 | trans-sialidase, Group V, putative                            | -0,03883 | 0,9091 |
| TcCLB.510197.47  | mucin TcMUCII (pseudogene), putative                          | -0,03886 | 0,9188 |
| TcCLB.508141.30  | hypothetical protein, conserved                               | -0,03898 | 0,7788 |
| TcCLB.508385.10  | hypothetical protein, conserved                               | -0,03905 | 0,7486 |
| TcCLB.503395.40  | 60S ribosomal protein L18, putative                           | -0,03915 | 0,6987 |
| TcCLB.510329.80  | hypothetical protein, conserved                               | -0,03921 | 0,7537 |
| TcCLB.511421.40  | transmembrane protein, putative                               | -0,03921 | 0,8302 |
| TcCLB.506983.60  | DNA excision repair protein, putative                         | -0,03937 | 0,7241 |
| TcCLB.504081.50  | mucin-associated surface protein (MASP), putative             | -0,03938 | 0,9171 |
| TcCLB.511557.70  | hypothetical protein, conserved                               | -0,0395  | 0,7545 |
| TcCLB.511277.4   | 30S ribosomal protein S8, putative (fragment)                 | -0,03958 | 0,8566 |
| TcCLB.506667.5   | surface protease GP63 (pseudogene), putative                  | -0,03968 | 0,9512 |

|                  |                                                           |          |        |
|------------------|-----------------------------------------------------------|----------|--------|
| TcCLB.507681.230 | hypothetical protein, conserved                           | -0,03974 | 0,7956 |
| TcCLB.509755.50  | trans-sialidase, Group V, putative                        | -0,0398  | 0,9163 |
| TcCLB.507795.90  | hypothetical protein, conserved                           | -0,03981 | 0,8575 |
| TcCLB.506777.24  | hypothetical protein, conserved                           | -0,03986 | 0,8504 |
| TcCLB.508645.20  | hypothetical protein                                      | -0,03998 | 0,8016 |
| TcCLB.508277.210 | hypothetical protein, conserved                           | -0,04001 | 0,8074 |
| TcCLB.511707.30  | hypothetical protein, conserved                           | -0,04016 | 0,7477 |
| TcCLB.507669.210 | hypothetical protein, conserved                           | -0,04017 | 0,831  |
| TcCLB.506175.80  | hypothetical protein, conserved                           | -0,0402  | 0,8753 |
| TcCLB.508373.20  | dihydroorotase, putative                                  | -0,04024 | 0,8041 |
| TcCLB.506883.34  | hypothetical protein, conserved                           | -0,04032 | 0,8246 |
| TcCLB.408437.29  | hypothetical protein (fragment)                           | -0,04041 | 0,7898 |
| TcCLB.511041.50  | flagellum transition zone component, putative             | -0,04046 | 0,6661 |
| TcCLB.509453.4   | hypothetical protein, conserved                           | -0,04055 | 0,8469 |
| TcCLB.511167.60  | hypothetical protein, conserved                           | -0,04058 | 0,7489 |
| TcCLB.507519.140 | Adenine phosphoribosyltransferase, putative               | -0,0406  | 0,7949 |
| TcCLB.504625.74  | hypothetical protein, conserved                           | -0,04061 | 0,8979 |
| TcCLB.508687.25  | hypothetical protein                                      | -0,04061 | 0,9092 |
| TcCLB.511635.40  | protein tyrosine phosphatase, putative                    | -0,04077 | 0,6976 |
| TcCLB.482319.19  | hypothetical protein, conserved                           | -0,04077 | 0,8612 |
| TcCLB.510943.26  | ribosomal protein L38, putative                           | -0,04098 | 0,7844 |
| TcCLB.511649.130 | vesicle-associated membrane protein, putative             | -0,041   | 0,7709 |
| TcCLB.507017.60  | hypothetical protein, conserved                           | -0,04104 | 0,7971 |
| TcCLB.461879.10  | retrotransposon hot spot protein (RHS, pseudogene), putat | -0,04107 | 0,8629 |
| TcCLB.504131.120 | hypothetical protein, conserved                           | -0,04108 | 0,809  |
| TcCLB.504827.120 | hypothetical protein, conserved                           | -0,0411  | 0,8151 |
| TcCLB.506709.10  | hypothetical protein, conserved                           | -0,04111 | 0,781  |
| TcCLB.511589.100 | hypothetical protein, conserved                           | -0,04112 | 0,8921 |
| TcCLB.510303.119 | hypothetical protein, conserved                           | -0,04114 | 0,8247 |
| TcCLB.510933.160 | mucin-associated surface protein (MASP, pseudogene), pu   | -0,04123 | 0,918  |
| TcCLB.511529.50  | hypothetical protein, conserved                           | -0,04128 | 0,8812 |
| TcCLB.506603.20  | mucin-associated surface protein (MASP, pseudogene), pu   | -0,04136 | 0,9314 |
| TcCLB.507811.60  | vesicle-associated membrane protein, putative             | -0,04157 | 0,7872 |
| TcCLB.508717.36  | selenophosphate synthetase, putative                      | -0,04159 | 0,7791 |
| TcCLB.511545.20  | ribosomal protein L27, putative                           | -0,04174 | 0,6975 |
| TcCLB.509997.86  | serine/threonine protein phosphatase, putative (fragment) | -0,04185 | 0,7661 |
| TcCLB.510747.90  | hypothetical protein                                      | -0,04203 | 0,7927 |
| TcCLB.503879.119 | protein transport protein Sec24C, putative                | -0,04215 | 0,7826 |
| TcCLB.506979.30  | hypothetical protein                                      | -0,0422  | 0,9298 |
| TcCLB.507071.89  | mucin TcMUCII (pseudogene), putative                      | -0,04224 | 0,9393 |
| TcCLB.509669.20  | subtilisin-like serine peptidase, putative                | -0,04234 | 0,7186 |
| TcCLB.508647.220 | mitochondrial RNA binding protein 1                       | -0,04236 | 0,6656 |
| TcCLB.506529.620 | hypothetical protein                                      | -0,04236 | 0,8346 |
| TcCLB.509721.10  | MRB1 complex subunit MRB3010 (MRB3010)                    | -0,04238 | 0,8527 |
| TcCLB.506857.100 | endoplasmatic reticulum retrieval protein, putative       | -0,04243 | 0,732  |

|                  |                                                              |          |        |
|------------------|--------------------------------------------------------------|----------|--------|
| TcCLB.509985.20  | hypothetical protein, conserved                              | -0,04244 | 0,8037 |
| TcCLB.508777.120 | hypothetical protein, conserved                              | -0,04246 | 0,8389 |
| TcCLB.509179.220 | hypothetical protein, conserved                              | -0,04248 | 0,8292 |
| TcCLB.508357.23  | hypothetical protein, conserved                              | -0,04252 | 0,8297 |
| TcCLB.506435.170 | hypothetical protein, conserved                              | -0,04252 | 0,8784 |
| TcCLB.508637.140 | hypothetical protein, conserved                              | -0,04254 | 0,7708 |
| TcCLB.507071.240 | mucin-associated surface protein (MASP), putative            | -0,04269 | 0,9319 |
| TcCLB.506335.20  | trans-sialidase (pseudogene), putative                       | -0,04272 | 0,9141 |
| TcCLB.506661.100 | hypothetical protein, conserved                              | -0,0428  | 0,8984 |
| TcCLB.432995.9   | trans-sialidase, putative                                    | -0,04298 | 0,9612 |
| TcCLB.506441.10  | hypothetical protein, conserved                              | -0,04307 | 0,7046 |
| TcCLB.510377.30  | mucin-associated surface protein (MASP, pseudogene), pu      | -0,04317 | 0,9499 |
| TcCLB.510603.30  | hypothetical protein, conserved                              | -0,04318 | 0,9152 |
| TcCLB.503805.3   | kinesin heavy chain, putative                                | -0,0432  | 0,8705 |
| TcCLB.511829.10  | dispersed gene family protein 1 (DGF-1), putative            | -0,0433  | 0,7595 |
| TcCLB.511211.180 | hypothetical protein, conserved                              | -0,04335 | 0,7681 |
| TcCLB.511647.60  | hypothetical protein, conserved                              | -0,04342 | 0,7462 |
| TcCLB.504867.30  | hypothetical protein, conserved                              | -0,04347 | 0,8957 |
| TcCLB.511261.40  | hypothetical protein                                         | -0,04362 | 0,7932 |
| TcCLB.508461.480 | 60S ribosomal protein L23, putative                          | -0,04364 | 0,6016 |
| TcCLB.511717.30  | chromosomal passenger protein, putative (CPC1)               | -0,0437  | 0,7943 |
| TcCLB.511279.60  | hypothetical protein, conserved                              | -0,04376 | 0,7243 |
| TcCLB.508307.10  | hypothetical protein, conserved                              | -0,04381 | 0,9042 |
| TcCLB.406999.10  | dispersed gene family protein 1 (DGF-1), putative (fragme    | -0,04393 | 0,9542 |
| TcCLB.511581.20  | fatty acyl CoA syntetase 1                                   | -0,04394 | 0,7835 |
| TcCLB.508815.120 | hypothetical protein, conserved                              | -0,044   | 0,79   |
| TcCLB.506227.180 | ras-related protein RAB5B, putative (RAB5B)                  | -0,04409 | 0,7422 |
| TcCLB.511753.140 | vacuolar assembly protein vps41, putative                    | -0,0441  | 0,8544 |
| TcCLB.507633.110 | mucin-associated surface protein (MASP, pseudogene), pu      | -0,04412 | 0,9172 |
| TcCLB.503973.260 | syntaxin binding protein (pseudogene), putative              | -0,04412 | 0,9291 |
| TcCLB.508221.180 | trans-sialidase, Group V, putative                           | -0,04426 | 0,9273 |
| TcCLB.506629.10  | intraflagellar transport protein 88, putative (fragment) (IF | -0,04435 | 0,8406 |
| TcCLB.506831.10  | hypothetical protein                                         | -0,04436 | 0,7805 |
| TcCLB.504057.178 | hypothetical protein, conserved                              | -0,04439 | 0,8045 |
| TcCLB.473709.10  | trans-sialidase, putative (fragment)                         | -0,04444 | 0,9553 |
| TcCLB.510325.50  | DNA replication complex GINS protein SLD5, putative          | -0,04446 | 0,8491 |
| TcCLB.504137.120 | hypothetical protein, conserved                              | -0,04451 | 0,79   |
| TcCLB.503957.20  | retrotransposon hot spot (RHS) protein, putative             | -0,04454 | 0,7869 |
| TcCLB.511649.70  | structural maintenance of chromosome 3 protein, putative     | -0,04462 | 0,8008 |
| TcCLB.511733.40  | FUN14 family, putative (POMP32)                              | -0,04481 | 0,8489 |
| TcCLB.507615.120 | hypothetical protein, conserved                              | -0,04493 | 0,842  |
| TcCLB.507941.60  | hypothetical protein, conserved                              | -0,04498 | 0,8337 |
| TcCLB.508375.50  | dihydroorotate dehydrogenase (fumarate), putative (DHOC      | -0,04503 | 0,8107 |
| TcCLB.506503.160 | hypothetical protein, conserved                              | -0,04506 | 0,6639 |
| TcCLB.506581.50  | hypothetical protein, conserved                              | -0,04523 | 0,8248 |

|                  |                                                             |          |        |
|------------------|-------------------------------------------------------------|----------|--------|
| TcCLB.504147.99  | hypothetical protein                                        | -0,04528 | 0,6841 |
| TcCLB.510759.4   | hypothetical protein, conserved                             | -0,04538 | 0,8211 |
| TcCLB.506855.350 | hypothetical protein                                        | -0,04538 | 0,8296 |
| TcCLB.511651.19  | delta-adaptin, putative                                     | -0,04539 | 0,8752 |
| TcCLB.503953.14  | hypothetical protein, conserved                             | -0,04547 | 0,8229 |
| TcCLB.506485.40  | kinesin (pseudogene), putative                              | -0,04588 | 0,645  |
| TcCLB.508347.100 | hypothetical protein, conserved                             | -0,0459  | 0,7438 |
| TcCLB.511717.50  | hypothetical protein, conserved                             | -0,04595 | 0,7752 |
| TcCLB.508857.80  | hypothetical protein, conserved                             | -0,04595 | 0,8337 |
| TcCLB.511671.50  | hypothetical protein, conserved                             | -0,04611 | 0,6385 |
| TcCLB.504147.80  | metallo-peptidase, Clan MA(E) Family M3                     | -0,04617 | 0,6023 |
| TcCLB.509753.100 | mucin-associated surface protein (MASP), putative           | -0,04631 | 0,9325 |
| TcCLB.511907.60  | hypothetical protein, conserved                             | -0,04633 | 0,8076 |
| TcCLB.506753.50  | hypothetical protein, conserved                             | -0,04647 | 0,7454 |
| TcCLB.504019.3   | hypothetical protein (fragment)                             | -0,04659 | 0,8194 |
| TcCLB.511149.190 | mucin-associated surface protein (MASP, pseudogene), pu     | -0,04663 | 0,8952 |
| TcCLB.507433.9   | ATP-dependent DEAD/H DNA helicase recQ, putative (fragm     | -0,04666 | 0,7008 |
| TcCLB.509895.100 | hypothetical protein, conserved                             | -0,04671 | 0,798  |
| TcCLB.506869.70  | mitochondrial structure specific endonuclease I (SSE-1), pu | -0,04676 | 0,7881 |
| TcCLB.508153.770 | hypothetical protein, conserved                             | -0,04681 | 0,7268 |
| TcCLB.508163.170 | trans-sialidase (pseudogene), putative                      | -0,04689 | 0,9297 |
| TcCLB.507207.19  | FtsJ cell division protein, putative (fragment)             | -0,04693 | 0,5886 |
| TcCLB.509691.10  | hypothetical protein, conserved                             | -0,04695 | 0,863  |
| TcCLB.508681.20  | hypothetical protein                                        | -0,04712 | 0,9407 |
| TcCLB.510877.120 | NADPH-dependent FMN/FAD containing oxidoreductase, p        | -0,04716 | 0,7304 |
| TcCLB.506599.80  | mucin-associated surface protein (MASP), putative           | -0,04724 | 0,9417 |
| TcCLB.508291.10  | mucin-associated surface protein (MASP, pseudogene), pu     | -0,04727 | 0,9103 |
| TcCLB.508379.29  | hypothetical protein, conserved                             | -0,04733 | 0,8762 |
| TcCLB.408573.9   | hypothetical protein, conserved                             | -0,04735 | 0,8214 |
| TcCLB.510799.9   | hypothetical protein, conserved                             | -0,04742 | 0,8253 |
| TcCLB.511019.90  | iron superoxide dismutase, putative                         | -0,04748 | 0,6825 |
| TcCLB.509455.50  | hypothetical protein, conserved                             | -0,04749 | 0,7747 |
| TcCLB.503583.10  | metallo-peptidase, Clan MC, Family M14, putative            | -0,04749 | 0,7871 |
| TcCLB.507251.20  | ribosomal protein L21E (60S), putative                      | -0,04751 | 0,5278 |
| TcCLB.507711.180 | hypothetical protein, conserved                             | -0,04754 | 0,7517 |
| TcCLB.511657.70  | hypothetical protein, conserved                             | -0,04755 | 0,7433 |
| TcCLB.508207.20  | protein kinase, putative                                    | -0,04763 | 0,8693 |
| TcCLB.511733.130 | chaperonin HSP60, putative (fragment)                       | -0,04764 | 0,8268 |
| TcCLB.506957.23  | hypothetical protein, conserved                             | -0,04769 | 0,6689 |
| TcCLB.510687.40  | serine/threonine protein phosphatase, putative              | -0,04778 | 0,7209 |
| TcCLB.511621.150 | hypothetical protein, conserved                             | -0,04786 | 0,7128 |
| TcCLB.510885.30  | hypothetical protein                                        | -0,04788 | 0,7387 |
| TcCLB.510149.80  | ABC transporter, putative                                   | -0,0479  | 0,594  |
| TcCLB.508209.80  | hypothetical protein, conserved                             | -0,04802 | 0,7756 |
| TcCLB.504039.250 | surface protease GP63 (pseudogene), putative                | -0,04802 | 0,9027 |

|                  |                                                            |          |        |
|------------------|------------------------------------------------------------|----------|--------|
| TcCLB.468005.9   | pumilio/PUF RNA binding protein 3, putative (PUF3)         | -0,04809 | 0,7166 |
| TcCLB.511615.10  | trans-sialidase, Group V, putative                         | -0,04826 | 0,925  |
| TcCLB.504077.60  | hypothetical protein, conserved (pseudogene)               | -0,0483  | 0,8974 |
| TcCLB.503477.30  | hypothetical protein, conserved                            | -0,04833 | 0,8268 |
| TcCLB.510725.99  | Chaperonin HSP60, mitochondrial (HSP60)                    | -0,04841 | 0,873  |
| TcCLB.507669.170 | WD40/YVTN repeat-like-containing protein                   | -0,04845 | 0,6736 |
| TcCLB.511715.30  | hypothetical protein, conserved                            | -0,04849 | 0,8407 |
| TcCLB.509953.9   | ubiquitin carboxyl-terminal hydrolase, putative (fragment) | -0,0485  | 0,8364 |
| TcCLB.510321.20  | hypothetical protein, conserved                            | -0,04853 | 0,7617 |
| TcCLB.506559.370 | hypothetical protein, conserved                            | -0,0486  | 0,7535 |
| TcCLB.509985.30  | hypothetical protein, conserved                            | -0,04872 | 0,8007 |
| TcCLB.511099.220 | mucin-associated surface protein (MASP), putative          | -0,04878 | 0,9376 |
| TcCLB.507843.10  | retrotransposon hot spot (RHS) protein, putative           | -0,04883 | 0,79   |
| TcCLB.507907.20  | trans-sialidase, Group II, putative                        | -0,04886 | 0,8656 |
| TcCLB.508175.20  | hypothetical protein, conserved                            | -0,04888 | 0,6178 |
| TcCLB.504181.30  | 40S ribosomal protein S23, putative                        | -0,04888 | 0,8583 |
| TcCLB.511711.50  | hypothetical protein, conserved                            | -0,04895 | 0,7823 |
| TcCLB.506725.30  | hypothetical protein, conserved                            | -0,04914 | 0,6251 |
| TcCLB.511819.59  | dynein heavy chain, cytosolic, putative                    | -0,04917 | 0,7197 |
| TcCLB.510431.310 | hypothetical protein, conserved                            | -0,04924 | 0,8869 |
| TcCLB.503811.40  | PTS2 receptor, putative (PEX7)                             | -0,04958 | 0,8162 |
| TcCLB.509911.80  | hypothetical protein, conserved                            | -0,04963 | 0,7966 |
| TcCLB.509055.20  | hypothetical protein, conserved                            | -0,04964 | 0,7176 |
| TcCLB.509875.200 | copper homeostasis protein, putative                       | -0,04966 | 0,7482 |
| TcCLB.506279.10  | trans-sialidase, Group VI, putative                        | -0,04972 | 0,8735 |
| TcCLB.507915.10  | hypothetical protein, conserved                            | -0,04982 | 0,8895 |
| TcCLB.504425.80  | hypothetical protein, conserved                            | -0,05001 | 0,7536 |
| TcCLB.510257.120 | hypothetical protein, conserved                            | -0,05006 | 0,7639 |
| TcCLB.511797.210 | trans-sialidase (pseudogene), putative                     | -0,05006 | 0,8878 |
| TcCLB.509733.50  | hypothetical protein, conserved                            | -0,05007 | 0,7502 |
| TcCLB.509245.10  | hypothetical protein, conserved                            | -0,0501  | 0,7899 |
| TcCLB.506767.21  | syntaxin binding protein (pseudogene), putative            | -0,05018 | 0,9236 |
| TcCLB.508207.194 | hypothetical protein, conserved                            | -0,05039 | 0,7037 |
| TcCLB.508177.60  | hypothetical protein, conserved                            | -0,05041 | 0,7757 |
| TcCLB.510761.73  | dynein-associated protein, putative                        | -0,05042 | 0,7902 |
| TcCLB.460757.20  | hypothetical protein (fragment)                            | -0,05043 | 0,926  |
| TcCLB.510279.90  | mucin-associated surface protein (MASP, pseudogene), pu    | -0,05049 | 0,9215 |
| TcCLB.511015.20  | ribosomal protein S29, putative                            | -0,05055 | 0,8025 |
| TcCLB.511715.100 | pumilio/PUF RNA binding protein 7, putative (PUF7)         | -0,05064 | 0,6955 |
| TcCLB.509069.14  | hypothetical protein, conserved                            | -0,05069 | 0,7769 |
| TcCLB.511445.90  | hypothetical protein, conserved                            | -0,05071 | 0,6706 |
| TcCLB.510229.20  | 8-oxoguanine DNA glycosylase, putative                     | -0,05072 | 0,7821 |
| TcCLB.509645.19  | hypothetical protein, conserved                            | -0,05078 | 0,7676 |
| TcCLB.503485.20  | hypothetical protein, conserved (pseudogene)               | -0,05079 | 0,841  |
| TcCLB.503973.350 | hypothetical protein                                       | -0,05081 | 0,9306 |



|                  |                                                                 |          |        |
|------------------|-----------------------------------------------------------------|----------|--------|
| TcCLB.506733.50  | actin-like protein, putative                                    | -0,05085 | 0,7425 |
| TcCLB.507595.10  | dispersed gene family protein 1 (DGF-1, pseudogene), putative   | -0,05096 | 0,9139 |
| TcCLB.510765.50  | hypothetical protein, conserved                                 | -0,05102 | 0,79   |
| TcCLB.509429.140 | kinetoplastid kinetochore protein 6, putative (kkt6)            | -0,05112 | 0,8061 |
| TcCLB.510431.240 | hypothetical protein, conserved                                 | -0,05115 | 0,7405 |
| TcCLB.510955.50  | hypothetical protein, conserved                                 | -0,05115 | 0,8313 |
| TcCLB.510655.110 | poly(A)-specific ribonuclease PARN, putative                    | -0,05129 | 0,7249 |
| TcCLB.509073.60  | hypothetical protein, conserved                                 | -0,05144 | 0,7766 |
| TcCLB.504147.120 | 60S ribosomal protein L22, putative                             | -0,05146 | 0,551  |
| TcCLB.509037.40  | eukaryotic translation initiation factor 4E, putative           | -0,05154 | 0,6661 |
| TcCLB.506281.14  | hypothetical protein                                            | -0,05154 | 0,8348 |
| TcCLB.503493.10  | hypothetical protein, conserved                                 | -0,05157 | 0,7462 |
| TcCLB.508589.41  | N-acetyltransferase complex ARD1 subunit (pseudogene), putative | -0,05174 | 0,9251 |
| TcCLB.507209.60  | hypothetical protein, conserved                                 | -0,05182 | 0,6891 |
| TcCLB.509875.210 | 60S ribosomal protein L17, putative                             | -0,05183 | 0,5753 |
| TcCLB.474339.9   | hypothetical protein, conserved                                 | -0,05185 | 0,7648 |
| TcCLB.511283.310 | hypothetical protein, conserved                                 | -0,05191 | 0,6591 |
| TcCLB.508589.51  | ATP-dependent DEAD/H RNA helicase (pseudogene), putative        | -0,05192 | 0,8933 |
| TcCLB.509551.50  | hypothetical protein                                            | -0,05197 | 0,5999 |
| TcCLB.509707.20  | hypothetical protein, conserved                                 | -0,05197 | 0,6385 |
| TcCLB.508539.169 | trans-sialidase (pseudogene), putative                          | -0,05203 | 0,8947 |
| TcCLB.506503.50  | hypothetical protein, conserved                                 | -0,05211 | 0,6961 |
| TcCLB.507521.115 | hypothetical protein, conserved                                 | -0,05214 | 0,8375 |
| TcCLB.511643.10  | hypothetical protein, conserved                                 | -0,05238 | 0,7651 |
| TcCLB.509083.9   | ATP-dependent DEAD/H RNA helicase, putative                     | -0,0526  | 0,832  |
| TcCLB.507093.229 | U-rich RNA-binding protein UBP-2                                | -0,05283 | 0,6555 |
| TcCLB.509641.50  | hypothetical protein, conserved                                 | -0,05285 | 0,7333 |
| TcCLB.504055.40  | dihydroxyacetone phosphate acyltransferase, putative (DAAT)     | -0,05291 | 0,6273 |
| TcCLB.507937.50  | mucin-associated surface protein (MASP), putative               | -0,05307 | 0,8991 |
| TcCLB.510485.9   | dispersed gene family protein 1 (DGF-1), putative               | -0,05314 | 0,8897 |
| TcCLB.509551.149 | phosphatidylserine decarboxylase, putative                      | -0,05318 | 0,8544 |
| TcCLB.506189.10  | nucleolar protein, putative                                     | -0,05327 | 0,7305 |
| TcCLB.509395.80  | hypothetical protein, conserved                                 | -0,05328 | 0,697  |
| TcCLB.509099.130 | hypothetical protein, conserved                                 | -0,05333 | 0,671  |
| TcCLB.509445.10  | tryparedoxin peroxidase, putative                               | -0,05333 | 0,7945 |
| TcCLB.506335.150 | mucin-associated surface protein (MASP, pseudogene), putative   | -0,05336 | 0,8952 |
| TcCLB.511495.20  | hypothetical protein, conserved                                 | -0,05337 | 0,7509 |
| TcCLB.507711.270 | hypothetical protein, conserved                                 | -0,05342 | 0,7703 |
| TcCLB.504203.20  | sec1-like protein, putative                                     | -0,05345 | 0,653  |
| TcCLB.511249.4   | RNA editing 3' terminal uridylyl transferase 1, putative        | -0,05347 | 0,8075 |
| TcCLB.504161.30  | hypothetical protein, conserved                                 | -0,05354 | 0,797  |
| TcCLB.509267.20  | hypothetical protein                                            | -0,05355 | 0,757  |
| TcCLB.503965.39  | hypothetical protein, conserved                                 | -0,05361 | 0,8181 |
| TcCLB.508389.90  | surface protease GP63, putative                                 | -0,05363 | 0,8985 |
| TcCLB.508873.103 | mucin-associated surface protein (MASP, pseudogene), putative   | -0,05366 | 0,9312 |

|                  |                                                               |          |        |
|------------------|---------------------------------------------------------------|----------|--------|
| TcCLB.510743.40  | prenyl protein specific carboxyl methyltransferase, putative  | -0,05368 | 0,7659 |
| TcCLB.507541.40  | casein kinase, putative                                       | -0,05373 | 0,4937 |
| TcCLB.510719.160 | 60S ribosomal protein L22, putative                           | -0,05373 | 0,5368 |
| TcCLB.506703.50  | mucin-associated surface protein (MASP), putative             | -0,0539  | 0,8737 |
| TcCLB.506769.40  | hypothetical protein                                          | -0,05415 | 0,9471 |
| TcCLB.507035.120 | hypothetical protein, conserved                               | -0,05437 | 0,7577 |
| TcCLB.508175.39  | hypothetical protein, conserved                               | -0,05458 | 0,7687 |
| TcCLB.509253.20  | tubulin tyrosine ligase, putative                             | -0,05469 | 0,7652 |
| TcCLB.506989.250 | hypothetical protein, conserved                               | -0,05474 | 0,6908 |
| TcCLB.508027.50  | hypothetical protein, conserved                               | -0,05479 | 0,7904 |
| TcCLB.507007.30  | hypothetical protein                                          | -0,05484 | 0,7576 |
| TcCLB.506321.101 | hypothetical protein, conserved (pseudogene)                  | -0,05491 | 0,9133 |
| TcCLB.508303.30  | hypothetical protein, conserved                               | -0,05503 | 0,7888 |
| TcCLB.506311.20  | palmitoyl acyltransferase 2, putative                         | -0,05504 | 0,739  |
| TcCLB.509799.120 | hypothetical protein, conserved                               | -0,05504 | 0,776  |
| TcCLB.506575.60  | diacylglycerol kinase, putative                               | -0,05512 | 0,7357 |
| TcCLB.506327.20  | hypothetical protein, conserved                               | -0,05513 | 0,7844 |
| TcCLB.511911.94  | hypothetical protein, conserved                               | -0,05516 | 0,6602 |
| TcCLB.479517.50  | surface protease GP63, putative                               | -0,05524 | 0,8928 |
| TcCLB.507499.53  | ATP-dependent DEAD/H RNA helicase (pseudogene), putative      | -0,05528 | 0,8406 |
| TcCLB.509715.9   | Ribosomal RNA processing protein 41A (RRP41A)                 | -0,05533 | 0,7717 |
| TcCLB.510901.10  | hypothetical protein, conserved                               | -0,05539 | 0,7463 |
| TcCLB.509999.40  | COPII coat assembly protein sec16, putative (sec16)           | -0,05542 | 0,5541 |
| TcCLB.506213.80  | 60S ribosomal protein L17, putative                           | -0,05544 | 0,7621 |
| TcCLB.509931.20  | trans-sialidase, Group VIII, putative                         | -0,05545 | 0,875  |
| TcCLB.511291.110 | hypothetical protein, conserved                               | -0,05546 | 0,7405 |
| TcCLB.507673.20  | 60S ribosomal protein L13a, putative                          | -0,05547 | 0,6318 |
| TcCLB.507761.10  | dispersed gene family protein 1 (DGF-1, pseudogene), putative | -0,05552 | 0,8683 |
| TcCLB.511633.79  | microtubule-associated protein, putative                      | -0,05573 | 0,7144 |
| TcCLB.506989.20  | hypothetical protein, conserved                               | -0,05578 | 0,6457 |
| TcCLB.506667.170 | hypothetical protein                                          | -0,05581 | 0,9203 |
| TcCLB.506789.170 | ATPase, putative                                              | -0,05583 | 0,7318 |
| TcCLB.508559.29  | dispersed gene family protein 1 (DGF-1), putative             | -0,05583 | 0,7747 |
| TcCLB.508521.11  | trans-sialidase (pseudogene), putative                        | -0,05602 | 0,8393 |
| TcCLB.474887.9   | pseudouridine synthase TruD, putative (fragment)              | -0,05604 | 0,7719 |
| TcCLB.508165.290 | mucin TcMUCII, putative                                       | -0,05622 | 0,9474 |
| TcCLB.510029.70  | 40S ribosomal protein S13, putative                           | -0,0563  | 0,6164 |
| TcCLB.507093.140 | hypothetical protein, conserved                               | -0,05631 | 0,7191 |
| TcCLB.511585.190 | eukaryotic initiation factor 4a, putative                     | -0,05636 | 0,5503 |
| TcCLB.506631.10  | hypothetical protein, conserved                               | -0,05643 | 0,7855 |
| TcCLB.507041.65  | hypothetical protein, conserved (pseudogene)                  | -0,05645 | 0,907  |
| TcCLB.511735.10  | chaperonin HSP60/CNP60, putative                              | -0,05649 | 0,806  |
| TcCLB.506057.101 | surface protease GP63, putative (fragment)                    | -0,05651 | 0,963  |
| TcCLB.511291.100 | Vesicle-trafficking protein SEC22, putative (SEC22)           | -0,05656 | 0,7639 |
| TcCLB.506591.81  | hypothetical protein, conserved (pseudogene)                  | -0,05661 | 0,7881 |

|                  |                                                           |          |        |
|------------------|-----------------------------------------------------------|----------|--------|
| TcCLB.506757.120 | trans-sialidase, Group V, putative                        | -0,05663 | 0,7249 |
| TcCLB.510219.30  | CPSF 30 kDa subunit, putative (CPSF30)                    | -0,05663 | 0,7272 |
| TcCLB.507011.160 | hypothetical protein, conserved                           | -0,05672 | 0,7112 |
| TcCLB.457109.9   | dispersed gene family protein 1 (DGF-1), putative (fragme | -0,05681 | 0,8029 |
| TcCLB.511557.40  | hypothetical protein, conserved                           | -0,05683 | 0,7457 |
| TcCLB.509199.40  | hypothetical protein, conserved                           | -0,05686 | 0,7726 |
| TcCLB.506245.70  | mucin-associated surface protein (MASP, pseudogene), pu   | -0,05689 | 0,8918 |
| TcCLB.507099.60  | hypothetical protein, conserved                           | -0,05694 | 0,7009 |
| TcCLB.509911.30  | hypothetical protein                                      | -0,05699 | 0,7438 |
| TcCLB.503789.30  | hypothetical protein, conserved                           | -0,05732 | 0,8186 |
| TcCLB.508319.70  | 40S ribosomal protein S11, putative                       | -0,05735 | 0,5455 |
| TcCLB.511483.20  | hypothetical protein, conserved                           | -0,05748 | 0,7132 |
| TcCLB.506959.30  | ATP-dependent DEAD/H RNA helicase, putative               | -0,05756 | 0,6271 |
| TcCLB.508459.9   | hypothetical protein, conserved                           | -0,05757 | 0,7844 |
| TcCLB.505229.10  | Isoprenylcysteine alpha-carbonyl methylesterase, putative | -0,05771 | 0,6503 |
| TcCLB.510431.245 | hypothetical protein, conserved (pseudogene)              | -0,05776 | 0,7956 |
| TcCLB.503723.70  | protein farnesyltransferase, putative                     | -0,05778 | 0,6989 |
| TcCLB.508647.80  | hypothetical protein, conserved                           | -0,05782 | 0,7123 |
| TcCLB.509631.160 | hypothetical protein, conserved                           | -0,05802 | 0,7545 |
| TcCLB.506559.524 | protein phosphatase 2C, putative                          | -0,05807 | 0,7509 |
| TcCLB.507591.9   | retrotransposon hot spot protein (RHS, pseudogene), putat | -0,05812 | 0,7313 |
| TcCLB.503759.10  | trans-sialidase, Group II, putative                       | -0,05827 | 0,8008 |
| TcCLB.505207.40  | dispersed gene family protein 1 (DGF-1), putative         | -0,05827 | 0,8486 |
| TcCLB.510579.100 | hypothetical protein, conserved                           | -0,05829 | 0,7282 |
| TcCLB.506559.510 | hypothetical protein, conserved                           | -0,05831 | 0,7932 |
| TcCLB.509163.80  | glycine dehydrogenase [decarboxylating], putative         | -0,05838 | 0,8389 |
| TcCLB.504239.330 | surface protease GP63 (pseudogene), putative              | -0,05847 | 0,9101 |
| TcCLB.508815.80  | hypothetical protein, conserved                           | -0,05852 | 0,5353 |
| TcCLB.507053.170 | hypothetical protein, conserved                           | -0,05864 | 0,6591 |
| TcCLB.508307.110 | hypothetical protein, conserved                           | -0,05865 | 0,5407 |
| TcCLB.511401.111 | elongation factor 1-gamma (EF-1-gamma, pseudogene), p     | -0,05866 | 0,8285 |
| TcCLB.506367.100 | hypothetical protein, conserved                           | -0,05872 | 0,7556 |
| TcCLB.509647.110 | hypothetical protein, conserved                           | -0,0588  | 0,6597 |
| TcCLB.508153.800 | hypothetical protein                                      | -0,05885 | 0,7595 |
| TcCLB.506223.10  | hypothetical protein, conserved                           | -0,05891 | 0,767  |
| TcCLB.510575.190 | 60S ribosomal protein L10, putative                       | -0,05894 | 0,5664 |
| TcCLB.511751.110 | hypothetical protein, conserved                           | -0,05907 | 0,7135 |
| TcCLB.508413.84  | kinetoplastid membrane protein KMP-11 (fragment)          | -0,05909 | 0,7119 |
| TcCLB.507811.120 | myosin heavy chain MYA2-related, putative                 | -0,05911 | 0,6586 |
| TcCLB.510077.30  | Mitogen-activated kinase kinase kinase, putative          | -0,05914 | 0,8252 |
| TcCLB.506713.10  | hypothetical protein, conserved                           | -0,05928 | 0,7671 |
| TcCLB.509099.80  | hypothetical protein, conserved                           | -0,05933 | 0,5282 |
| TcCLB.509877.40  | hypothetical protein, conserved                           | -0,05951 | 0,5641 |
| TcCLB.510401.50  | trans-sialidase (pseudogene), putative                    | -0,05955 | 0,7988 |
| TcCLB.508625.90  | DNA damage repair protein, putative                       | -0,05958 | 0,6607 |

|                  |                                                            |          |        |
|------------------|------------------------------------------------------------|----------|--------|
| TcCLB.506351.30  | hypothetical protein, conserved                            | -0,05962 | 0,7186 |
| TcCLB.506503.30  | hypothetical protein, conserved                            | -0,05964 | 0,6783 |
| TcCLB.508047.20  | mucin-associated surface protein (MASP), putative          | -0,05967 | 0,8759 |
| TcCLB.510899.40  | hypothetical protein, conserved                            | -0,05973 | 0,8239 |
| TcCLB.506751.100 | mucin-associated surface protein (MASP), putative          | -0,05981 | 0,9059 |
| TcCLB.504827.90  | hypothetical protein, conserved                            | -0,05984 | 0,7454 |
| TcCLB.507933.20  | hypothetical protein, conserved                            | -0,05985 | 0,7631 |
| TcCLB.511311.80  | hypothetical protein, conserved                            | -0,05989 | 0,5157 |
| TcCLB.503791.10  | TPR-repeat-containing chaperone protein DNAJ, putative (f  | -0,05997 | 0,7462 |
| TcCLB.511603.90  | trans-sialidase, Group V, putative                         | -0,06015 | 0,8591 |
| TcCLB.503423.10  | glycine dehydrogenase [decarboxylating] (pseudogene), pu   | -0,06027 | 0,802  |
| TcCLB.503897.90  | hypothetical protein, conserved                            | -0,06034 | 0,6592 |
| TcCLB.503893.90  | hypothetical protein, conserved                            | -0,06048 | 0,7482 |
| TcCLB.504141.31  | hypothetical protein, conserved (pseudogene)               | -0,06054 | 0,834  |
| TcCLB.507275.20  | hypothetical protein, conserved                            | -0,06059 | 0,5836 |
| TcCLB.508799.170 | 3-methylcrotonoyl-CoA carboxylase beta subunit, putative   | -0,0606  | 0,5673 |
| TcCLB.511923.30  | trans-sialidase, Group V, putative                         | -0,06067 | 0,8281 |
| TcCLB.506885.320 | hypothetical protein, conserved                            | -0,0607  | 0,6441 |
| TcCLB.509749.33  | ribosomal protein L29, putative                            | -0,06071 | 0,6407 |
| TcCLB.506175.60  | GTPase activator protein, putative                         | -0,06076 | 0,6839 |
| TcCLB.503785.30  | hypothetical protein, conserved                            | -0,06077 | 0,802  |
| TcCLB.508243.23  | mucin TcMUCII, putative                                    | -0,06089 | 0,9134 |
| TcCLB.506247.340 | hypothetical protein, conserved                            | -0,06096 | 0,611  |
| TcCLB.506205.10  | hypothetical protein, conserved                            | -0,06101 | 0,6634 |
| TcCLB.511621.250 | hypothetical protein, conserved                            | -0,06114 | 0,7183 |
| TcCLB.510175.110 | trans-sialidase (pseudogene), putative                     | -0,06121 | 0,8179 |
| TcCLB.508667.20  | hypothetical protein                                       | -0,06122 | 0,7712 |
| TcCLB.507063.100 | mitochondrial DNA polymerase beta-PAK, putative            | -0,06132 | 0,65   |
| TcCLB.507959.250 | mucin TcMUCII, putative                                    | -0,0614  | 0,9229 |
| TcCLB.504131.80  | hypothetical protein, conserved                            | -0,06145 | 0,7565 |
| TcCLB.508707.280 | hypothetical protein, conserved                            | -0,06151 | 0,7776 |
| TcCLB.504057.60  | hypothetical protein, conserved                            | -0,06163 | 0,6311 |
| TcCLB.511283.180 | hypothetical protein, conserved                            | -0,06189 | 0,5663 |
| TcCLB.506961.35  | trans-sialidase (pseudogene), putative                     | -0,06194 | 0,8252 |
| TcCLB.508209.60  | spliced leader RNA PSE-promoter transcription factor, puta | -0,06203 | 0,661  |
| TcCLB.508355.370 | hypothetical protein, conserved                            | -0,06203 | 0,7263 |
| TcCLB.506599.280 | mucin-associated surface protein (MASP, pseudogene), pu    | -0,06213 | 0,9174 |
| TcCLB.511751.130 | small GTP-binding protein Rab28, putative                  | -0,06224 | 0,7393 |
| TcCLB.503735.10  | hypothetical protein, conserved                            | -0,06225 | 0,7853 |
| TcCLB.507681.80  | hypothetical protein                                       | -0,06238 | 0,6341 |
| TcCLB.506181.140 | hypothetical protein                                       | -0,06242 | 0,6792 |
| TcCLB.511309.14  | hypothetical protein, conserved                            | -0,06251 | 0,8391 |
| TcCLB.509437.109 | trans-sialidase (pseudogene), putative                     | -0,0626  | 0,8266 |
| TcCLB.511321.70  | hypothetical protein, conserved                            | -0,06261 | 0,6563 |
| TcCLB.507063.70  | trans-sialidase, Group II, putative                        | -0,06267 | 0,6884 |

|                  |                                                           |          |        |
|------------------|-----------------------------------------------------------|----------|--------|
| TcCLB.511811.20  | hypothetical protein, conserved                           | -0,06267 | 0,6916 |
| TcCLB.511649.169 | ATP-dependent DEAD/H RNA helicase, putative               | -0,06269 | 0,6758 |
| TcCLB.509791.40  | hypothetical protein, conserved                           | -0,06288 | 0,5832 |
| TcCLB.508305.20  | mucin-associated surface protein (MASP), putative         | -0,06289 | 0,8854 |
| TcCLB.509169.10  | hypothetical protein, conserved                           | -0,0629  | 0,6707 |
| TcCLB.511019.26  | trans-sialidase (pseudogene), putative                    | -0,06293 | 0,752  |
| TcCLB.506753.180 | hypothetical protein, conserved                           | -0,06294 | 0,7587 |
| TcCLB.510149.140 | Triple RNA binding domain protein 3 (TRRM3)               | -0,06307 | 0,6314 |
| TcCLB.508221.730 | 90 kDa surface protein, putative                          | -0,06318 | 0,9288 |
| TcCLB.507805.9   | histone deacetylase 4, putative                           | -0,0632  | 0,8362 |
| TcCLB.511261.140 | 60S ribosomal protein L34, putative                       | -0,06327 | 0,5211 |
| TcCLB.506217.30  | hypothetical protein                                      | -0,06328 | 0,8597 |
| TcCLB.509419.160 | mucin TcMUCII, putative                                   | -0,06329 | 0,9441 |
| TcCLB.508139.230 | retrotransposon hot spot protein (RHS, pseudogene), putat | -0,06351 | 0,6835 |
| TcCLB.509399.190 | pumilio/PUF RNA binding protein 4, putative (PUF4)        | -0,06361 | 0,783  |
| TcCLB.507769.30  | hypothetical protein, conserved                           | -0,06362 | 0,5692 |
| TcCLB.511255.80  | mucin-associated surface protein (MASP), putative         | -0,06367 | 0,8577 |
| TcCLB.507927.10  | hypothetical protein, conserved                           | -0,06372 | 0,7666 |
| TcCLB.506955.161 | elongation factor 1-gamma (EF-1-gamma, pseudogene), p     | -0,06373 | 0,8945 |
| TcCLB.508409.240 | hypothetical protein, conserved                           | -0,06394 | 0,6343 |
| TcCLB.511441.10  | calpain cysteine peptidase, putative                      | -0,06398 | 0,717  |
| TcCLB.510415.9   | dispersed gene family protein 1 (DGF-1), putative (fragme | -0,06416 | 0,8455 |
| TcCLB.507673.40  | hypothetical protein, conserved                           | -0,06417 | 0,5824 |
| TcCLB.422207.21  | retrotransposon hot spot protein (RHS, pseudogene), putat | -0,06432 | 0,8805 |
| TcCLB.508543.10  | DNA polymerase sigma, putative                            | -0,06433 | 0,5845 |
| TcCLB.503939.130 | hypothetical protein, conserved                           | -0,06435 | 0,6104 |
| TcCLB.504045.10  | hypothetical protein, conserved                           | -0,06436 | 0,6271 |
| TcCLB.506723.30  | hypothetical protein                                      | -0,06446 | 0,8382 |
| TcCLB.509795.30  | hypothetical protein, conserved                           | -0,06464 | 0,6431 |
| TcCLB.507089.50  | ATP-dependent DEAD/H RNA helicase, putative               | -0,06471 | 0,6512 |
| TcCLB.511585.80  | mitochondrial-processing peptidase subunit beta, putative | -0,06472 | 0,6152 |
| TcCLB.511861.130 | trans-sialidase (pseudogene), putative                    | -0,06515 | 0,7639 |
| TcCLB.510359.210 | hypothetical protein, conserved                           | -0,0652  | 0,6663 |
| TcCLB.510525.30  | hypothetical protein, conserved                           | -0,06524 | 0,6178 |
| TcCLB.511621.80  | hypothetical protein                                      | -0,06538 | 0,8104 |
| TcCLB.503685.30  | carnitine/choline acetyltransferase, putative             | -0,06546 | 0,7413 |
| TcCLB.508231.50  | legume-like lectin, putative                              | -0,06547 | 0,6838 |
| TcCLB.506945.70  | protein mkt1, putative                                    | -0,06552 | 0,4468 |
| TcCLB.508297.20  | UDP-Gal or UDP-GlcNAc-dependent glycosyltransferase, pu   | -0,06561 | 0,8462 |
| TcCLB.508723.10  | hypothetical protein, conserved                           | -0,06564 | 0,6734 |
| TcCLB.509047.100 | hypothetical protein, conserved                           | -0,06565 | 0,7343 |
| TcCLB.507357.110 | hypothetical protein, conserved (pseudogene)              | -0,06573 | 0,9182 |
| TcCLB.511849.15  | mucin-associated surface protein (MASP, pseudogene), pu   | -0,06579 | 0,6131 |
| TcCLB.511737.30  | hypothetical protein, conserved                           | -0,06598 | 0,6457 |
| TcCLB.506673.10  | hypothetical protein, conserved                           | -0,06601 | 0,7479 |

|                  |                                                             |          |        |
|------------------|-------------------------------------------------------------|----------|--------|
| TcCLB.506131.140 | mucin-associated surface protein (MASP), putative           | -0,06604 | 0,8961 |
| TcCLB.511277.630 | serine/threonine protein phosphatase type 5, putative       | -0,06605 | 0,6249 |
| TcCLB.503805.40  | hypothetical protein                                        | -0,06612 | 0,6349 |
| TcCLB.506957.80  | hypothetical protein, conserved                             | -0,06614 | 0,5268 |
| TcCLB.510729.20  | hypothetical protein, conserved                             | -0,0663  | 0,6904 |
| TcCLB.503777.19  | phosphoribosylpyrophosphate synthetase, putative            | -0,0663  | 0,7348 |
| TcCLB.506885.30  | hypothetical protein, conserved                             | -0,06635 | 0,7265 |
| TcCLB.507641.120 | ATP-dependent DEAD/H RNA helicase, putative                 | -0,06643 | 0,5746 |
| TcCLB.511309.7   | hypothetical protein                                        | -0,06643 | 0,7921 |
| TcCLB.506471.40  | beta galactofuranosyl glycosyltransferase, putative         | -0,06655 | 0,8658 |
| TcCLB.507689.5   | hypothetical protein, conserved (fragment)                  | -0,06663 | 0,8427 |
| TcCLB.511391.60  | trans-sialidase (pseudogene), putative                      | -0,06671 | 0,8728 |
| TcCLB.506933.89  | calmodulin, putative                                        | -0,06678 | 0,738  |
| TcCLB.508445.40  | hypothetical protein, conserved                             | -0,06686 | 0,7455 |
| TcCLB.506517.50  | hypothetical protein, conserved                             | -0,0669  | 0,6939 |
| TcCLB.509033.109 | hypothetical protein, conserved                             | -0,06693 | 0,8125 |
| TcCLB.511167.119 | hypothetical protein, conserved (fragment)                  | -0,06698 | 0,61   |
| TcCLB.511215.60  | hypothetical protein, conserved                             | -0,06699 | 0,7341 |
| TcCLB.511773.30  | hypothetical protein                                        | -0,06708 | 0,8115 |
| TcCLB.503657.50  | hypothetical protein, conserved                             | -0,06712 | 0,7126 |
| TcCLB.508675.50  | hypothetical protein, conserved                             | -0,06721 | 0,6037 |
| TcCLB.507841.34  | exosome-associated protein 4, putative                      | -0,06721 | 0,7537 |
| TcCLB.509525.160 | mucin-associated surface protein (MASP, pseudogene), pu     | -0,06726 | 0,862  |
| TcCLB.506763.350 | hypothetical protein, conserved (pseudogene)                | -0,0673  | 0,9312 |
| TcCLB.511439.10  | expression site-associated gene (ESAG-like) protein, putati | -0,06737 | 0,9249 |
| TcCLB.509791.90  | hypothetical protein, conserved                             | -0,06744 | 0,7173 |
| TcCLB.506613.50  | mucin-associated surface protein (MASP), putative           | -0,06751 | 0,8018 |
| TcCLB.504769.41  | surface protease GP63 (pseudogene), putative                | -0,06751 | 0,8237 |
| TcCLB.503723.40  | hypothetical protein, conserved                             | -0,06753 | 0,6622 |
| TcCLB.511145.49  | GPI transamidase component GAA1, putative                   | -0,06756 | 0,6266 |
| TcCLB.511753.50  | hypothetical protein, conserved                             | -0,06756 | 0,775  |
| TcCLB.511577.90  | pseudouridylate synthase-like protein, putative             | -0,06759 | 0,6649 |
| TcCLB.507739.30  | hypothetical protein, conserved                             | -0,06765 | 0,5995 |
| TcCLB.507939.14  | hypothetical protein, conserved                             | -0,06778 | 0,7582 |
| TcCLB.503971.5   | hypothetical protein, conserved                             | -0,06784 | 0,8848 |
| TcCLB.503453.30  | 60S ribosomal protein L30, putative                         | -0,06822 | 0,5318 |
| TcCLB.506597.36  | hypothetical protein, conserved (pseudogene)                | -0,06829 | 0,9342 |
| TcCLB.506181.50  | 60S ribosomal protein L18, putative                         | -0,0686  | 0,4572 |
| TcCLB.505949.80  | mucin-associated surface protein (MASP), putative           | -0,06865 | 0,822  |
| TcCLB.506413.10  | CDP-DAG synthase, putative (fragment) (CDS)                 | -0,06871 | 0,7678 |
| TcCLB.511923.120 | dihydroorotate dehydrogenase, putative (DHODH)              | -0,06882 | 0,7455 |
| TcCLB.510805.60  | surface protease GP63 (pseudogene), putative                | -0,06884 | 0,9217 |
| TcCLB.506425.40  | hypothetical protein, conserved                             | -0,06885 | 0,3539 |
| TcCLB.504431.30  | Present in the outer mitochondrial membrane proteome 2!     | -0,06887 | 0,6037 |
| TcCLB.508919.50  | hypothetical protein                                        | -0,0689  | 0,6891 |

|                  |                                                           |          |        |
|------------------|-----------------------------------------------------------|----------|--------|
| TcCLB.507071.294 | surface protease GP63 (pseudogene), putative              | -0,069   | 0,933  |
| TcCLB.508837.34  | dispersed gene family protein 1 (DGF-1), putative (fragme | -0,06902 | 0,7056 |
| TcCLB.503555.50  | hypothetical protein, conserved                           | -0,06903 | 0,7599 |
| TcCLB.510021.20  | mucin-associated surface protein (MASP), putative         | -0,06912 | 0,8819 |
| TcCLB.509551.64  | small nuclear ribonucleoprotein Sm-F, putative            | -0,06914 | 0,8132 |
| TcCLB.508205.30  | protein kinase, putative                                  | -0,06928 | 0,598  |
| TcCLB.507801.100 | hypothetical protein, conserved                           | -0,06942 | 0,6172 |
| TcCLB.509837.20  | hypothetical protein, conserved                           | -0,06954 | 0,5309 |
| TcCLB.505037.100 | dispersed gene family protein 1 (DGF-1), putative         | -0,06954 | 0,6102 |
| TcCLB.511321.10  | FG-GAP repeat protein, putative                           | -0,0696  | 0,5017 |
| TcCLB.508601.40  | hypothetical protein, conserved                           | -0,06962 | 0,7544 |
| TcCLB.508179.50  | hypothetical protein, conserved                           | -0,06964 | 0,6721 |
| TcCLB.508607.50  | trans-sialidase, Group II, putative                       | -0,06968 | 0,771  |
| TcCLB.506971.30  | trans-sialidase (pseudogene), putative                    | -0,06971 | 0,8656 |
| TcCLB.503833.60  | hypothetical protein, conserved                           | -0,06988 | 0,6629 |
| TcCLB.507663.40  | hypothetical protein, conserved                           | -0,07005 | 0,812  |
| TcCLB.507787.130 | hypothetical protein, conserved                           | -0,07011 | 0,605  |
| TcCLB.510407.20  | hypothetical protein, conserved                           | -0,07017 | 0,6095 |
| TcCLB.506739.140 | hypothetical protein, conserved                           | -0,07026 | 0,8092 |
| TcCLB.445849.10  | hypothetical protein, conserved                           | -0,07048 | 0,7194 |
| TcCLB.509109.90  | hypothetical protein, conserved                           | -0,07049 | 0,7671 |
| TcCLB.509007.14  | hypothetical protein, conserved                           | -0,0705  | 0,674  |
| TcCLB.506797.120 | hypothetical protein, conserved                           | -0,07053 | 0,5914 |
| TcCLB.511245.190 | hypothetical protein, conserved                           | -0,07053 | 0,7121 |
| TcCLB.508207.45  | hypothetical protein, conserved                           | -0,07054 | 0,6772 |
| TcCLB.511283.194 | hypothetical protein, conserved                           | -0,07069 | 0,6752 |
| TcCLB.506887.90  | hypothetical protein, conserved                           | -0,07074 | 0,5584 |
| TcCLB.504021.40  | hypothetical protein, conserved                           | -0,07082 | 0,59   |
| TcCLB.511377.30  | mucin-associated surface protein (MASP), putative         | -0,07082 | 0,9081 |
| TcCLB.508999.70  | mucin-associated surface protein (MASP), putative         | -0,07086 | 0,8346 |
| TcCLB.399033.19  | mitochondrial RNA binding protein 1                       | -0,07097 | 0,5891 |
| TcCLB.504159.60  | hypothetical protein, conserved                           | -0,07099 | 0,6715 |
| TcCLB.507723.20  | hypothetical protein                                      | -0,07103 | 0,8597 |
| TcCLB.503525.40  | FAD dependent oxidoreductase, putative (POMP20)           | -0,07106 | 0,5612 |
| TcCLB.509805.70  | hypothetical protein, conserved                           | -0,07109 | 0,5563 |
| TcCLB.504867.50  | hypothetical protein, conserved                           | -0,0711  | 0,5974 |
| TcCLB.504109.189 | hypothetical protein                                      | -0,07112 | 0,8967 |
| TcCLB.508539.50  | hypothetical protein, conserved                           | -0,07113 | 0,6406 |
| TcCLB.509897.51  | hypothetical protein, conserved (pseudogene)              | -0,07119 | 0,7391 |
| TcCLB.509053.20  | hypothetical protein, conserved                           | -0,07137 | 0,6158 |
| TcCLB.506755.100 | hypothetical protein, conserved                           | -0,07138 | 0,7319 |
| TcCLB.511263.30  | hypothetical protein, conserved                           | -0,07147 | 0,5511 |
| TcCLB.505073.30  | mu-adaptin 4, putative                                    | -0,07152 | 0,71   |
| TcCLB.505297.50  | trans-sialidase (pseudogene), putative                    | -0,07155 | 0,5685 |
| TcCLB.510669.30  | hypothetical protein, conserved                           | -0,07158 | 0,6126 |

|                  |                                                               |          |        |
|------------------|---------------------------------------------------------------|----------|--------|
| TcCLB.503823.10  | phosphoglycerate mutase family member 5, putative             | -0,07159 | 0,7846 |
| TcCLB.508293.10  | trans-sialidase (pseudogene), putative                        | -0,07168 | 0,8604 |
| TcCLB.505171.109 | Present in the outer mitochondrial membrane proteome 1        | -0,07172 | 0,8296 |
| TcCLB.509099.110 | hypothetical protein, conserved                               | -0,07175 | 0,7972 |
| TcCLB.511855.50  | hypothetical protein, conserved                               | -0,07185 | 0,5314 |
| TcCLB.511621.180 | hypothetical protein, conserved                               | -0,07211 | 0,6403 |
| TcCLB.510021.130 | mucin-associated surface protein (MASP), putative             | -0,07214 | 0,8049 |
| TcCLB.509965.160 | hypothetical protein, conserved                               | -0,07216 | 0,7235 |
| TcCLB.508821.30  | hypothetical protein                                          | -0,07223 | 0,5192 |
| TcCLB.506295.60  | hypothetical protein, conserved                               | -0,07224 | 0,7678 |
| TcCLB.506863.60  | hypothetical protein, conserved                               | -0,07231 | 0,6604 |
| TcCLB.510483.70  | mucin-associated surface protein (MASP), putative             | -0,07234 | 0,87   |
| TcCLB.507083.80  | hypothetical protein, conserved                               | -0,07238 | 0,7252 |
| TcCLB.508257.120 | hypothetical protein, conserved                               | -0,07247 | 0,6864 |
| TcCLB.509521.70  | hypothetical protein                                          | -0,07251 | 0,9146 |
| TcCLB.508693.50  | amidinotransferase, putative                                  | -0,07255 | 0,4309 |
| TcCLB.510575.160 | hypothetical protein                                          | -0,07255 | 0,669  |
| TcCLB.507229.20  | dispersed gene family protein 1 (DGF-1, pseudogene), putative | -0,07257 | 0,7179 |
| TcCLB.470687.9   | hypothetical protein, conserved                               | -0,07276 | 0,7173 |
| TcCLB.509315.20  | trans-sialidase (pseudogene), putative                        | -0,07279 | 0,8858 |
| TcCLB.508303.40  | hypothetical protein, conserved                               | -0,07296 | 0,6873 |
| TcCLB.510975.10  | hypothetical protein, conserved (pseudogene)                  | -0,07297 | 0,8048 |
| TcCLB.508723.90  | hypothetical protein, conserved                               | -0,07298 | 0,6517 |
| TcCLB.510821.40  | hypothetical protein, conserved                               | -0,07301 | 0,596  |
| TcCLB.504071.50  | spliceosome-associated protein, putative                      | -0,07312 | 0,5996 |
| TcCLB.506289.80  | small GTP-binding protein Rab32, putative                     | -0,07325 | 0,6229 |
| TcCLB.508893.40  | hypothetical protein, conserved (fragment)                    | -0,07331 | 0,8474 |
| TcCLB.511309.30  | hydrolase, alpha/beta fold family, putative                   | -0,07332 | 0,6594 |
| TcCLB.511589.80  | hypothetical protein, conserved                               | -0,07336 | 0,6948 |
| TcCLB.508175.260 | inorganic polyphosphate/ATP-NAD kinase, putative              | -0,07342 | 0,506  |
| TcCLB.509099.89  | hypothetical protein, conserved                               | -0,07344 | 0,6411 |
| TcCLB.508213.30  | hypothetical protein                                          | -0,07355 | 0,6962 |
| TcCLB.505999.80  | hypothetical protein, conserved                               | -0,07359 | 0,7003 |
| TcCLB.507011.180 | hypothetical protein, conserved                               | -0,07363 | 0,589  |
| TcCLB.508707.234 | hypothetical protein, conserved                               | -0,07372 | 0,7118 |
| TcCLB.506739.190 | serine/threonine protein kinase, putative                     | -0,0738  | 0,571  |
| TcCLB.507979.10  | hypothetical protein, conserved                               | -0,07392 | 0,7187 |
| TcCLB.509319.70  | hypothetical protein, conserved                               | -0,07396 | 0,6835 |
| TcCLB.511277.130 | hypothetical protein, conserved                               | -0,07397 | 0,4931 |
| TcCLB.510899.59  | hypothetical protein, conserved                               | -0,07398 | 0,5454 |
| TcCLB.506529.330 | hypothetical protein, conserved                               | -0,07407 | 0,6902 |
| TcCLB.508867.9   | kinesin, putative (fragment)                                  | -0,0742  | 0,8056 |
| TcCLB.506765.50  | mucin-associated surface protein (MASP), putative             | -0,0742  | 0,8706 |
| TcCLB.511527.9   | hypothetical protein, conserved                               | -0,07421 | 0,7132 |
| TcCLB.503673.27  | 8-oxoguanine DNA glycosylase (pseudogene), putative           | -0,0743  | 0,8147 |



|                  |                                                             |          |        |
|------------------|-------------------------------------------------------------|----------|--------|
| TcCLB.506321.230 | hypothetical protein                                        | -0,0743  | 0,8464 |
| TcCLB.508909.250 | hypothetical protein, conserved                             | -0,07432 | 0,6534 |
| TcCLB.506859.30  | hypothetical protein                                        | -0,07434 | 0,5436 |
| TcCLB.511287.100 | hypothetical protein, conserved                             | -0,07436 | 0,6344 |
| TcCLB.506723.41  | beta galactofuranosyl glycosyltransferase (pseudogene), p   | -0,0744  | 0,7154 |
| TcCLB.506355.170 | hypothetical protein, conserved                             | -0,07455 | 0,7088 |
| TcCLB.511727.120 | ethanolamine-phosphate cytidyltransferase (ECT)             | -0,07456 | 0,4595 |
| TcCLB.506789.190 | hypothetical protein, conserved                             | -0,07465 | 0,6299 |
| TcCLB.507887.30  | hypothetical protein, conserved                             | -0,07466 | 0,7355 |
| TcCLB.507957.304 | surface protease GP63 (pseudogene), putative                | -0,07478 | 0,9214 |
| TcCLB.504021.120 | hypothetical protein, conserved                             | -0,07495 | 0,6042 |
| TcCLB.508283.10  | dispersed gene family protein 1 (DGF-1), putative           | -0,075   | 0,7881 |
| TcCLB.503997.19  | hypothetical protein, conserved                             | -0,07504 | 0,6752 |
| TcCLB.510729.150 | tubulin tyrosine ligase, putative                           | -0,07514 | 0,5571 |
| TcCLB.506529.640 | hypothetical protein, conserved                             | -0,07521 | 0,4867 |
| TcCLB.507637.45  | mucin-associated surface protein (MASP, pseudogene), pu     | -0,07521 | 0,8963 |
| TcCLB.510441.30  | trans-sialidase (pseudogene), putative                      | -0,07533 | 0,6976 |
| TcCLB.509141.10  | hypothetical protein                                        | -0,07539 | 0,4954 |
| TcCLB.511289.14  | mitogen-activated protein kinase kinase kinase, putative (C | -0,07548 | 0,5335 |
| TcCLB.506363.110 | RNA editing ligase, putative                                | -0,0755  | 0,6064 |
| TcCLB.506587.30  | hypothetical protein, conserved                             | -0,07554 | 0,5957 |
| TcCLB.511013.3   | ATP-dependent DEAD/H RNA helicase (pseudogene), putat       | -0,07554 | 0,8933 |
| TcCLB.507801.114 | aldo-keto reductase (pseudogene), putative                  | -0,07562 | 0,7147 |
| TcCLB.511735.50  | hypothetical protein, conserved                             | -0,07572 | 0,6189 |
| TcCLB.511179.140 | hypothetical protein, conserved                             | -0,07594 | 0,5262 |
| TcCLB.511925.60  | hypothetical protein, conserved                             | -0,07602 | 0,6771 |
| TcCLB.510583.30  | mucin TcMUCII, putative                                     | -0,07603 | 0,9371 |
| TcCLB.507023.280 | hypothetical protein, conserved                             | -0,07604 | 0,6696 |
| TcCLB.503703.60  | hypothetical protein                                        | -0,07606 | 0,6453 |
| TcCLB.511643.4   | hypothetical protein, conserved                             | -0,07611 | 0,8452 |
| TcCLB.510601.10  | hypothetical protein, conserved                             | -0,07627 | 0,7873 |
| TcCLB.508397.50  | hypothetical protein, conserved                             | -0,07634 | 0,6222 |
| TcCLB.509733.134 | hypothetical protein, conserved                             | -0,07643 | 0,7562 |
| TcCLB.510297.110 | cAMP binding protein, putative                              | -0,0766  | 0,4042 |
| TcCLB.508965.60  | rac serine-threonine kinase, putative                       | -0,07667 | 0,5536 |
| TcCLB.510723.20  | hypothetical protein                                        | -0,07667 | 0,5684 |
| TcCLB.506389.50  | hypothetical protein, conserved                             | -0,07673 | 0,5599 |
| TcCLB.506975.49  | f-actin capping protein beta subunit, putative              | -0,07677 | 0,7032 |
| TcCLB.508479.170 | hypothetical protein, conserved                             | -0,07693 | 0,6121 |
| TcCLB.511903.60  | hypothetical protein, conserved                             | -0,07693 | 0,7465 |
| TcCLB.511355.40  | GUP1, putative                                              | -0,07702 | 0,6086 |
| TcCLB.511715.10  | iron superoxide dismutase, putative                         | -0,07707 | 0,5993 |
| TcCLB.503723.10  | hypothetical protein, conserved                             | -0,07711 | 0,7112 |
| TcCLB.506211.70  | RNA-binding protein, putative                               | -0,07724 | 0,5806 |
| TcCLB.510657.130 | hypothetical protein, conserved                             | -0,07727 | 0,7066 |

|                  |                                                               |          |        |
|------------------|---------------------------------------------------------------|----------|--------|
| TcCLB.431849.10  | hypothetical protein, conserved                               | -0,07732 | 0,8107 |
| TcCLB.510725.70  | hypothetical protein, conserved                               | -0,07744 | 0,6006 |
| TcCLB.507503.11  | protein kinase (pseudogene), putative                         | -0,07745 | 0,5112 |
| TcCLB.507611.30  | glycine dehydrogenase (pseudogene), putative                  | -0,07745 | 0,845  |
| TcCLB.511037.40  | hypothetical protein, conserved                               | -0,07756 | 0,8307 |
| TcCLB.507041.20  | hypothetical protein, conserved                               | -0,07758 | 0,6086 |
| TcCLB.506513.70  | hypothetical protein                                          | -0,0776  | 0,6299 |
| TcCLB.510303.280 | hypothetical protein                                          | -0,07762 | 0,6281 |
| TcCLB.510629.410 | hypothetical protein, conserved                               | -0,07766 | 0,7617 |
| TcCLB.506657.70  | RNA editing 3' terminal uridylyl transferase 1, putative      | -0,07768 | 0,388  |
| TcCLB.507603.160 | hypothetical protein, conserved                               | -0,07769 | 0,7173 |
| TcCLB.506635.50  | hypothetical protein                                          | -0,07775 | 0,5327 |
| TcCLB.422031.10  | solanesyl-diphosphate synthase, putative                      | -0,07775 | 0,6584 |
| TcCLB.506967.150 | trans-sialidase (pseudogene), putative                        | -0,07778 | 0,8359 |
| TcCLB.508067.10  | hypothetical protein, conserved                               | -0,07784 | 0,3092 |
| TcCLB.506885.260 | hypothetical protein, conserved                               | -0,07786 | 0,4779 |
| TcCLB.425435.10  | trans-sialidase, putative (fragment)                          | -0,07795 | 0,8594 |
| TcCLB.508897.10  | GDP-mannose 4,6 dehydratase, putative                         | -0,07809 | 0,6873 |
| TcCLB.509163.50  | hypothetical protein                                          | -0,07823 | 0,8466 |
| TcCLB.508871.60  | mucin-associated surface protein (MASP), putative             | -0,07827 | 0,8837 |
| TcCLB.511189.54  | hypothetical protein                                          | -0,0783  | 0,6796 |
| TcCLB.511231.80  | Nascent polypeptide-associated complex subunit beta, putative | -0,07833 | 0,6671 |
| TcCLB.511109.120 | beta-ketoacyl synthase family protein, putative               | -0,07856 | 0,687  |
| TcCLB.506767.209 | syntaxin binding protein (pseudogene), putative               | -0,0787  | 0,8892 |
| TcCLB.504153.360 | succinyl-coA:3-ketoacid-coenzyme A transferase, mitochondr    | -0,07877 | 0,3433 |
| TcCLB.509965.370 | adenosine kinase, putative                                    | -0,07887 | 0,4909 |
| TcCLB.511415.50  | retrotransposon hot spot protein (RHS, pseudogene), putative  | -0,07894 | 0,7597 |
| TcCLB.509379.10  | dihydrolipoamide dehydrogenase, putative (GCVL-1)             | -0,07896 | 0,6529 |
| TcCLB.511231.50  | aminomethyltransferase, mitochondrial, putative (GCV)         | -0,079   | 0,5985 |
| TcCLB.507077.9   | hypothetical protein, conserved                               | -0,07904 | 0,633  |
| TcCLB.510311.190 | hypothetical protein, conserved                               | -0,07905 | 0,6    |
| TcCLB.508277.260 | actin-related protein 3, putative                             | -0,07911 | 0,5498 |
| TcCLB.506267.80  | mucin-associated surface protein (MASP), putative             | -0,07915 | 0,8763 |
| TcCLB.511173.270 | mucin-associated surface protein (MASP), putative             | -0,07922 | 0,7932 |
| TcCLB.506871.140 | cleavage and polyadenylation specificity factor, putative     | -0,07928 | 0,3883 |
| TcCLB.507941.130 | hypothetical protein, conserved                               | -0,07937 | 0,7018 |
| TcCLB.507491.140 | hypothetical protein, conserved                               | -0,07938 | 0,6437 |
| TcCLB.507723.150 | hypothetical protein, conserved                               | -0,07941 | 0,641  |
| TcCLB.508479.224 | hypothetical protein, conserved                               | -0,07943 | 0,7284 |
| TcCLB.510297.70  | hypothetical protein                                          | -0,07951 | 0,6516 |
| TcCLB.440083.10  | trans-sialidase, putative (fragment)                          | -0,07956 | 0,8191 |
| TcCLB.510105.310 | mucin-associated surface protein (MASP), putative             | -0,07957 | 0,8642 |
| TcCLB.511621.140 | hypothetical protein, conserved                               | -0,07969 | 0,6443 |
| TcCLB.510719.280 | hypothetical protein, conserved                               | -0,07974 | 0,6092 |
| TcCLB.509653.10  | mucin-associated surface protein (MASP), putative             | -0,07984 | 0,919  |

|                  |                                                          |          |        |
|------------------|----------------------------------------------------------|----------|--------|
| TcCLB.510821.60  | ribonucleoprotein p18, mitochondrial precursor, putative | -0,08001 | 0,4258 |
| TcCLB.506529.290 | hypothetical protein, conserved                          | -0,08001 | 0,6553 |
| TcCLB.470169.9   | hypothetical protein, conserved                          | -0,08004 | 0,697  |
| TcCLB.509805.170 | hypothetical protein, conserved                          | -0,08006 | 0,4657 |
| TcCLB.511521.40  | hypothetical protein, conserved                          | -0,08007 | 0,6483 |
| TcCLB.510531.50  | hypothetical protein, conserved                          | -0,0801  | 0,5544 |
| TcCLB.509429.290 | hydroxyacylglutathione hydrolase, putative               | -0,08012 | 0,6878 |
| TcCLB.504181.20  | 40S ribosomal protein S23, putative                      | -0,08021 | 0,3294 |
| TcCLB.506565.12  | RNA-binding protein, putative                            | -0,08031 | 0,6346 |
| TcCLB.511469.10  | hypothetical protein, conserved                          | -0,08031 | 0,7307 |
| TcCLB.509269.4   | Tb-291 membrane associated protein, putative             | -0,0804  | 0,5827 |
| TcCLB.507669.150 | glycosomal membrane protein, putative                    | -0,08041 | 0,7052 |
| TcCLB.510447.10  | dispersed gene family protein 1 (DGF-1), putative        | -0,08041 | 0,922  |
| TcCLB.506177.60  | hypothetical protein                                     | -0,08054 | 0,6116 |
| TcCLB.506789.20  | trans-sialidase, Group V, putative                       | -0,08056 | 0,873  |
| TcCLB.506147.184 | hypothetical protein, conserved                          | -0,08059 | 0,7219 |
| TcCLB.507053.150 | hypothetical protein, conserved                          | -0,08065 | 0,4801 |
| TcCLB.508065.40  | hypothetical protein, conserved                          | -0,08067 | 0,5827 |
| TcCLB.506885.364 | hypothetical protein, conserved                          | -0,08071 | 0,7032 |
| TcCLB.504079.6   | selenophosphate synthetase, putative                     | -0,08075 | 0,5307 |
| TcCLB.511421.50  | transmembrane protein, putative                          | -0,08079 | 0,4954 |
| TcCLB.510697.80  | mucin-associated surface protein (MASP), putative        | -0,0808  | 0,7815 |
| TcCLB.507611.320 | hypothetical protein, conserved                          | -0,08084 | 0,6775 |
| TcCLB.509145.19  | hypothetical protein, conserved                          | -0,08095 | 0,701  |
| TcCLB.505183.90  | hypothetical protein, conserved                          | -0,08095 | 0,7511 |
| TcCLB.506227.160 | MOZ/SAS family acetyltransferase, putative               | -0,08098 | 0,6104 |
| TcCLB.508277.70  | hypothetical protein, conserved                          | -0,08109 | 0,6017 |
| TcCLB.507023.40  | protein kinase, putative                                 | -0,08118 | 0,4616 |
| TcCLB.508141.70  | Kinesin-13 4, putative (KIN13-4)                         | -0,0812  | 0,663  |
| TcCLB.506605.80  | hypothetical protein, conserved                          | -0,08134 | 0,5997 |
| TcCLB.504933.30  | hypothetical protein                                     | -0,08145 | 0,3611 |
| TcCLB.508641.140 | hypothetical protein, conserved                          | -0,0815  | 0,7051 |
| TcCLB.508805.136 | UDP-Gal or UDP-GlcNAc-dependent glycosyltransferase, pu  | -0,08152 | 0,7888 |
| TcCLB.503885.40  | hypothetical protein, conserved                          | -0,08153 | 0,6304 |
| TcCLB.510625.19  | mucin-associated surface protein (MASP), putative        | -0,0816  | 0,9126 |
| TcCLB.506727.130 | hypothetical protein, conserved                          | -0,08164 | 0,6736 |
| TcCLB.511317.30  | regulator of nonsense transcripts UPF1, putative         | -0,0818  | 0,3546 |
| TcCLB.509127.10  | ATP-dependent Clp protease subunit, heat shock protein 7 | -0,08181 | 0,5652 |
| TcCLB.506439.9   | myosin heavy chain, putative                             | -0,08191 | 0,5976 |
| TcCLB.504185.40  | hypothetical protein, conserved                          | -0,08194 | 0,6041 |
| TcCLB.507895.10  | trans-sialidase (pseudogene), putative                   | -0,08199 | 0,9101 |
| TcCLB.506537.30  | hypothetical protein, conserved (pseudogene)             | -0,08211 | 0,5989 |
| TcCLB.511165.30  | hypothetical protein, conserved                          | -0,08211 | 0,7689 |
| TcCLB.508247.60  | hypothetical protein, conserved (pseudogene)             | -0,08211 | 0,8431 |
| TcCLB.506235.10  | translation initiation factor IF-2, putative             | -0,0822  | 0,3469 |

|                  |                                                            |          |        |
|------------------|------------------------------------------------------------|----------|--------|
| TcCLB.507775.20  | hypothetical protein, conserved                            | -0,0822  | 0,632  |
| TcCLB.508111.30  | glutamate dehydrogenase, putative                          | -0,08221 | 0,4254 |
| TcCLB.503859.45  | mucin TcMUCII, putative                                    | -0,08225 | 0,9007 |
| TcCLB.508125.80  | trans-sialidase (pseudogene), putative                     | -0,08256 | 0,8822 |
| TcCLB.509925.40  | trans-sialidase (pseudogene), putative                     | -0,0826  | 0,8174 |
| TcCLB.506457.130 | hypothetical protein, conserved                            | -0,08268 | 0,5601 |
| TcCLB.414243.20  | hypothetical protein, conserved                            | -0,08272 | 0,6546 |
| TcCLB.509479.10  | mucin TcMUCII, putative                                    | -0,08272 | 0,8008 |
| TcCLB.506173.190 | dispersed gene family protein 1 (DGF-1), putative          | -0,0828  | 0,802  |
| TcCLB.508737.50  | hypothetical protein, conserved                            | -0,0829  | 0,6823 |
| TcCLB.509937.110 | hypothetical protein, conserved                            | -0,08302 | 0,6087 |
| TcCLB.507049.10  | hypothetical protein, conserved                            | -0,08307 | 0,6383 |
| TcCLB.510001.20  | hypothetical protein, conserved                            | -0,08309 | 0,5005 |
| TcCLB.503755.50  | hypothetical protein, conserved                            | -0,08309 | 0,5562 |
| TcCLB.507991.120 | translation initiation factor IF-2, putative               | -0,0831  | 0,5839 |
| TcCLB.506585.80  | hypothetical protein, conserved                            | -0,0831  | 0,634  |
| TcCLB.510607.70  | trans-sialidase (pseudogene), putative                     | -0,08311 | 0,7984 |
| TcCLB.509263.10  | UDP-Gal or UDP-GlcNAc-dependent glycosyltransferase, pu    | -0,08337 | 0,832  |
| TcCLB.420533.9   | dihydrofolate reductase-thymidylate synthase, putative (fr | -0,08338 | 0,7244 |
| TcCLB.509989.10  | phosphatidylinositol 3-kinase, putative                    | -0,08383 | 0,7184 |
| TcCLB.509805.40  | Multisite-specific tRNA:(cytosine-C(5))-methyltransferase, | -0,08389 | 0,5351 |
| TcCLB.510635.60  | hypothetical protein, conserved                            | -0,0839  | 0,6486 |
| TcCLB.511001.150 | hypothetical protein, conserved                            | -0,08396 | 0,6199 |
| TcCLB.506607.19  | phosphoribosylpyrophosphate synthetase, putative           | -0,08402 | 0,6443 |
| TcCLB.511577.70  | hypothetical protein, conserved                            | -0,08405 | 0,5846 |
| TcCLB.510743.100 | chaperone DNAJ protein, putative                           | -0,08412 | 0,4607 |
| TcCLB.504949.14  | 60S ribosomal protein L6, putative                         | -0,08414 | 0,4783 |
| TcCLB.504883.10  | protein kinase, putative                                   | -0,08428 | 0,4455 |
| TcCLB.507011.90  | hypothetical protein, conserved                            | -0,08432 | 0,5067 |
| TcCLB.510729.50  | hypothetical protein, conserved                            | -0,08434 | 0,6734 |
| TcCLB.509699.40  | trans-sialidase, Group V, putative                         | -0,08441 | 0,8186 |
| TcCLB.510143.40  | UBX domain-containing protein                              | -0,08448 | 0,4883 |
| TcCLB.510073.50  | elongation factor 1-gamma (EF-1-gamma), putative           | -0,08458 | 0,606  |
| TcCLB.507093.330 | hypothetical protein, conserved                            | -0,0846  | 0,7166 |
| TcCLB.506305.10  | hypothetical protein, conserved                            | -0,0847  | 0,4557 |
| TcCLB.506811.220 | hypothetical protein, conserved                            | -0,08476 | 0,4549 |
| TcCLB.510879.20  | ribosomal protein S19, putative                            | -0,08492 | 0,3394 |
| TcCLB.507953.185 | hypothetical protein, conserved (pseudogene)               | -0,08499 | 0,8763 |
| TcCLB.508153.970 | AGC/RSK family serine/threonine kinase, putative           | -0,08503 | 0,6624 |
| TcCLB.511215.10  | hypothetical protein, conserved                            | -0,08511 | 0,5612 |
| TcCLB.508883.15  | trans-sialidase (pseudogene), putative                     | -0,08511 | 0,9006 |
| TcCLB.511001.130 | hypothetical protein, conserved                            | -0,08513 | 0,3339 |
| TcCLB.504427.90  | ribosomal RNA methyltransferase, putative                  | -0,08521 | 0,6202 |
| TcCLB.504101.40  | trans-sialidase (pseudogene), putative                     | -0,08528 | 0,5901 |
| TcCLB.507811.90  | hypothetical protein, conserved                            | -0,08531 | 0,5318 |

|                  |                                                                |          |        |
|------------------|----------------------------------------------------------------|----------|--------|
| TcCLB.507003.50  | hypothetical protein, conserved                                | -0,08536 | 0,705  |
| TcCLB.508461.290 | 4E-interacting protein, putative                               | -0,08537 | 0,534  |
| TcCLB.507669.239 | hypothetical protein, conserved                                | -0,08545 | 0,5921 |
| TcCLB.506203.110 | hypothetical protein, conserved                                | -0,0855  | 0,5622 |
| TcCLB.511865.90  | dynein heavy chain, putative                                   | -0,08551 | 0,5612 |
| TcCLB.506737.107 | mucin-associated surface protein (MASP, pseudogene), pu        | -0,08568 | 0,7161 |
| TcCLB.504213.10  | hypothetical protein, conserved                                | -0,08574 | 0,6943 |
| TcCLB.509965.50  | hypothetical protein, conserved                                | -0,08579 | 0,7386 |
| TcCLB.511907.70  | short chain dehydrogenase/reductase, putative                  | -0,0858  | 0,5524 |
| TcCLB.510767.69  | hypothetical protein, conserved                                | -0,08584 | 0,7077 |
| TcCLB.506405.30  | actin-like protein, putative                                   | -0,08591 | 0,6522 |
| TcCLB.506213.10  | hypothetical protein, conserved                                | -0,08602 | 0,6289 |
| TcCLB.511589.190 | hypothetical protein, conserved                                | -0,08604 | 0,6793 |
| TcCLB.506565.29  | hypothetical protein, conserved                                | -0,08604 | 0,7051 |
| TcCLB.509575.10  | retrotransposon hot spot (RHS) protein, putative               | -0,08609 | 0,5621 |
| TcCLB.510533.60  | hypothetical protein, conserved                                | -0,0861  | 0,6721 |
| TcCLB.506507.10  | N-acetylglucosamine-6-phosphate deacetylase-like proteir       | -0,08613 | 0,4791 |
| TcCLB.510257.139 | transcription activator, putative                              | -0,08614 | 0,5839 |
| TcCLB.508459.18  | phosphatidylserine decarboxylase, putative                     | -0,08617 | 0,8273 |
| TcCLB.510173.50  | hypothetical protein, conserved                                | -0,08618 | 0,7168 |
| TcCLB.507037.40  | hypothetical protein, conserved (pseudogene)                   | -0,08625 | 0,4159 |
| TcCLB.510903.40  | hypothetical protein, conserved                                | -0,08625 | 0,6095 |
| TcCLB.511303.24  | hypothetical protein, conserved                                | -0,08625 | 0,6185 |
| TcCLB.509891.20  | hypothetical protein, conserved (pseudogene)                   | -0,0863  | 0,6276 |
| TcCLB.504935.10  | eukaryotic translation initiation factor 4E, putative          | -0,08644 | 0,658  |
| TcCLB.506159.30  | dispersed gene family protein 1 (DGF-1), putative              | -0,08644 | 0,7933 |
| TcCLB.506529.440 | hypothetical protein, conserved                                | -0,08646 | 0,5454 |
| TcCLB.505999.120 | hypothetical protein                                           | -0,08655 | 0,6693 |
| TcCLB.509965.140 | hypothetical protein, conserved                                | -0,08687 | 0,5863 |
| TcCLB.506503.90  | kinesin, putative                                              | -0,0869  | 0,6734 |
| TcCLB.511349.20  | trans-sialidase (pseudogene), putative                         | -0,08692 | 0,7037 |
| TcCLB.507501.25  | hypothetical protein, conserved (pseudogene)                   | -0,08706 | 0,8608 |
| TcCLB.510755.138 | serine/threonine protein phosphatase, putative                 | -0,08715 | 0,5905 |
| TcCLB.509527.50  | mucin TcMUCII (pseudogene), putative                           | -0,08718 | 0,8922 |
| TcCLB.507603.80  | hypothetical protein, conserved                                | -0,0872  | 0,5441 |
| TcCLB.510297.20  | hypothetical protein, conserved                                | -0,08731 | 0,4736 |
| TcCLB.506835.120 | DNA ligase I, putative                                         | -0,08734 | 0,4561 |
| TcCLB.506243.50  | dispersed gene family protein 1 (DGF-1, pseudogene), puta      | -0,08735 | 0,7425 |
| TcCLB.508263.10  | hypothetical protein                                           | -0,08739 | 0,5549 |
| TcCLB.436535.10  | hypothetical protein, conserved                                | -0,08742 | 0,7093 |
| TcCLB.508977.80  | trans-sialidase, Group V, putative                             | -0,08756 | 0,7467 |
| TcCLB.503899.139 | hypothetical protein, conserved                                | -0,08762 | 0,3962 |
| TcCLB.508207.180 | Eukaryotic translation initiation factor 4E type 6, putative ( | -0,08766 | 0,5302 |
| TcCLB.509875.260 | hypothetical protein, conserved                                | -0,08776 | 0,6729 |
| TcCLB.506977.120 | hypothetical protein, conserved                                | -0,08778 | 0,5621 |

|                  |                                                             |          |        |
|------------------|-------------------------------------------------------------|----------|--------|
| TcCLB.507511.10  | cleavage and polyadenylation specificity factor, putative   | -0,08781 | 0,5119 |
| TcCLB.511529.20  | hypothetical protein, conserved                             | -0,08782 | 0,6375 |
| TcCLB.507093.220 | RNA-binding protein, putative                               | -0,08783 | 0,4693 |
| TcCLB.511423.60  | ribosomal RNA-processing protein 8, putative (RRP8)         | -0,08795 | 0,5637 |
| TcCLB.506957.140 | phosphatidylinositol-4-phosphate 5-kinase-like, putative    | -0,08796 | 0,4938 |
| TcCLB.507625.110 | chaperone DNAJ protein, putative                            | -0,08797 | 0,5156 |
| TcCLB.510517.110 | hypothetical protein                                        | -0,08797 | 0,7555 |
| TcCLB.509791.50  | bilobe protein, conserved                                   | -0,08801 | 0,5312 |
| TcCLB.506279.250 | trans-sialidase (pseudogene), putative                      | -0,08803 | 0,8285 |
| TcCLB.510181.40  | hypothetical protein, conserved                             | -0,08813 | 0,7542 |
| TcCLB.510519.30  | mitochondrial structure specific endonuclease I (SSE-1), pu | -0,08824 | 0,5449 |
| TcCLB.508951.70  | hypothetical protein, conserved                             | -0,0883  | 0,52   |
| TcCLB.511851.61  | mucin-associated surface protein (MASP, pseudogene), pu     | -0,08844 | 0,8643 |
| TcCLB.509161.70  | Mg transporter, putative                                    | -0,08849 | 0,5746 |
| TcCLB.506435.450 | hypothetical protein, conserved                             | -0,0885  | 0,5269 |
| TcCLB.510145.30  | hypothetical protein, conserved                             | -0,08863 | 0,5867 |
| TcCLB.505807.120 | lysyl-tRNA synthetase, putative                             | -0,08875 | 0,6111 |
| TcCLB.506337.190 | hypothetical protein, conserved                             | -0,08882 | 0,5443 |
| TcCLB.506925.170 | hypothetical protein, conserved                             | -0,08897 | 0,8762 |
| TcCLB.508741.260 | hypothetical protein, conserved                             | -0,08903 | 0,4657 |
| TcCLB.503899.60  | hypothetical protein, conserved                             | -0,08912 | 0,5772 |
| TcCLB.503893.10  | copper-transporting ATPase-like protein, putative           | -0,08916 | 0,7747 |
| TcCLB.506473.10  | Pre-mRNA-splicing factor 38, putative                       | -0,08917 | 0,7112 |
| TcCLB.508147.79  | mucin TcMUCII, putative                                     | -0,08922 | 0,895  |
| TcCLB.503851.54  | proteasome 26S non-ATPase subunit 9, putative               | -0,08943 | 0,8247 |
| TcCLB.503939.60  | hypothetical protein, conserved                             | -0,08947 | 0,4976 |
| TcCLB.507681.60  | hypothetical protein, conserved                             | -0,08947 | 0,713  |
| TcCLB.508693.84  | hypothetical protein, conserved                             | -0,08949 | 0,6525 |
| TcCLB.507389.70  | peptidase, putative                                         | -0,08968 | 0,3419 |
| TcCLB.510301.10  | fructose-bisphosphate aldolase, glycosomal, putative        | -0,0899  | 0,4799 |
| TcCLB.503487.10  | DNA-directed RNA polymerase, mitochondrial (fragment)       | -0,09001 | 0,6847 |
| TcCLB.504129.20  | hypothetical protein, conserved                             | -0,09017 | 0,3929 |
| TcCLB.506817.50  | ribosomal protein L27, putative                             | -0,0902  | 0,3862 |
| TcCLB.503829.50  | hypothetical protein, conserved                             | -0,09047 | 0,6292 |
| TcCLB.507903.19  | dispersed gene family protein 1 (DGF-1, pseudogene), puta   | -0,09048 | 0,7791 |
| TcCLB.504155.80  | mucin-associated surface protein (MASP), putative           | -0,09049 | 0,8729 |
| TcCLB.506513.90  | hypothetical protein, conserved                             | -0,09051 | 0,602  |
| TcCLB.510755.60  | ADP-ribosylation factor 1, putative (ARF1)                  | -0,09054 | 0,7106 |
| TcCLB.504109.50  | hypothetical protein, conserved                             | -0,09056 | 0,5655 |
| TcCLB.509569.110 | carrier protein, putative                                   | -0,09058 | 0,5841 |
| TcCLB.511911.21  | hypothetical protein, conserved                             | -0,0906  | 0,8348 |
| TcCLB.503899.100 | hypothetical protein                                        | -0,09069 | 0,5677 |
| TcCLB.509585.10  | dynein heavy chain, putative                                | -0,09082 | 0,3971 |
| TcCLB.507649.50  | hypothetical protein, conserved                             | -0,09085 | 0,3962 |
| TcCLB.508089.71  | hypothetical protein                                        | -0,09086 | 0,7008 |

|                  |                                                               |          |        |
|------------------|---------------------------------------------------------------|----------|--------|
| TcCLB.506465.20  | hypothetical protein, conserved                               | -0,09092 | 0,6095 |
| TcCLB.506869.50  | calcineurin B subunit, putative (CNB)                         | -0,09095 | 0,674  |
| TcCLB.511467.13  | hypothetical protein, conserved                               | -0,09101 | 0,7212 |
| TcCLB.506163.10  | surface protease GP63, putative                               | -0,09123 | 0,5618 |
| TcCLB.506757.30  | hypothetical protein, conserved                               | -0,09124 | 0,4937 |
| TcCLB.503719.10  | hypothetical protein                                          | -0,09137 | 0,4853 |
| TcCLB.509767.240 | hypothetical protein, conserved                               | -0,09137 | 0,6972 |
| TcCLB.508351.60  | hypothetical protein, conserved                               | -0,09146 | 0,4642 |
| TcCLB.510325.45  | hypothetical protein                                          | -0,09154 | 0,5555 |
| TcCLB.511711.70  | hypothetical protein, conserved                               | -0,09155 | 0,6049 |
| TcCLB.510737.70  | 60S ribosomal subunit protein L31, putative                   | -0,09164 | 0,6244 |
| TcCLB.508293.111 | elongation factor 1-gamma (EF-1-gamma, pseudogene), p         | -0,09166 | 0,8849 |
| TcCLB.511629.10  | hypothetical protein, conserved                               | -0,09183 | 0,5124 |
| TcCLB.508817.160 | Trichohyalin, putative                                        | -0,09185 | 0,5183 |
| TcCLB.506569.10  | cysteine peptidase, Clan CA, family C19, putative             | -0,09187 | 0,4971 |
| TcCLB.509767.215 | vesicle transport v-SNARE 11, putative                        | -0,09207 | 0,6589 |
| TcCLB.510275.355 | hypothetical protein                                          | -0,09217 | 0,8744 |
| TcCLB.509409.10  | protein kinase, putative                                      | -0,09222 | 0,5635 |
| TcCLB.509629.20  | DnaJ chaperone protein, putative                              | -0,0923  | 0,7041 |
| TcCLB.510725.30  | hypothetical protein, conserved                               | -0,09231 | 0,6394 |
| TcCLB.510765.60  | 60S ribosomal protein L5, putative                            | -0,09232 | 0,2421 |
| TcCLB.507939.40  | hypothetical protein, conserved                               | -0,09232 | 0,6954 |
| TcCLB.506367.170 | hypothetical protein                                          | -0,09235 | 0,4762 |
| TcCLB.506107.10  | hypothetical protein, conserved                               | -0,09236 | 0,4976 |
| TcCLB.506795.60  | hypothetical protein, conserved                               | -0,09241 | 0,4451 |
| TcCLB.507883.109 | mitochondrial malate dehydrogenase, putative                  | -0,09242 | 0,3004 |
| TcCLB.418185.43  | ATP-dependent DEAD/H RNA helicase (pseudogene), putat         | -0,09243 | 0,7635 |
| TcCLB.507801.144 | hypothetical protein, conserved                               | -0,09247 | 0,6859 |
| TcCLB.506335.80  | hypothetical protein                                          | -0,09258 | 0,8879 |
| TcCLB.508209.20  | hypothetical protein, conserved                               | -0,09261 | 0,6    |
| TcCLB.507053.100 | ubiquitin hydrolase, putative                                 | -0,09264 | 0,3726 |
| TcCLB.508415.40  | ADP-ribosylation factor 1, putative (ARF1)                    | -0,09264 | 0,4217 |
| TcCLB.509509.69  | hypothetical protein, conserved                               | -0,09265 | 0,6282 |
| TcCLB.504105.210 | Translation factor GUF1, mitochondrial, putative (GUF1)       | -0,09266 | 0,4343 |
| TcCLB.505965.86  | tRNA pseudouridine synthase (pseudogene), putative            | -0,09268 | 0,4804 |
| TcCLB.506289.50  | hypothetical protein, conserved                               | -0,09273 | 0,4644 |
| TcCLB.503539.10  | hypothetical protein, conserved                               | -0,09274 | 0,6966 |
| TcCLB.504119.10  | eukaryotic translation initiation factor 5, putative          | -0,09281 | 0,3719 |
| TcCLB.509171.47  | hypothetical protein, conserved                               | -0,09301 | 0,5509 |
| TcCLB.506947.30  | hypothetical protein, conserved                               | -0,09302 | 0,6818 |
| TcCLB.507077.20  | palmitoyl acyltransferase 4, putative                         | -0,09304 | 0,469  |
| TcCLB.505297.10  | dispersed gene family protein 1 (DGF-1, pseudogene), putative | -0,09304 | 0,8499 |
| TcCLB.509717.34  | hypothetical protein, conserved                               | -0,09307 | 0,6301 |
| TcCLB.506351.80  | oligopeptidase B-like protein, putative                       | -0,09308 | 0,4935 |
| TcCLB.506587.80  | hypothetical protein, conserved                               | -0,09311 | 0,5444 |

|                  |                                                            |          |        |
|------------------|------------------------------------------------------------|----------|--------|
| TcCLB.510359.600 | mucin-associated surface protein (MASP), putative          | -0,09316 | 0,8166 |
| TcCLB.503901.18  | hypothetical protein, conserved (fragment)                 | -0,09318 | 0,5331 |
| TcCLB.511899.30  | hypothetical protein, conserved                            | -0,09324 | 0,4877 |
| TcCLB.509671.150 | hypothetical protein, conserved                            | -0,09333 | 0,6325 |
| TcCLB.509939.19  | hypothetical protein, conserved                            | -0,09377 | 0,3997 |
| TcCLB.506965.160 | hypothetical protein                                       | -0,09392 | 0,8614 |
| TcCLB.506965.40  | trans-sialidase (pseudogene), putative                     | -0,09409 | 0,808  |
| TcCLB.504163.10  | hypothetical protein, conserved                            | -0,09412 | 0,4253 |
| TcCLB.508013.120 | elongation factor 1-alpha (ef-1-alpha), putative           | -0,09422 | 0,848  |
| TcCLB.509563.40  | hypothetical protein, conserved                            | -0,09444 | 0,5461 |
| TcCLB.508723.20  | hypothetical protein, conserved                            | -0,09448 | 0,5551 |
| TcCLB.506269.40  | mucin-associated surface protein (MASP), putative          | -0,0945  | 0,8061 |
| TcCLB.427091.10  | solanesyl-diphosphate synthase, putative                   | -0,09453 | 0,6343 |
| TcCLB.510887.40  | hypothetical protein, conserved                            | -0,09454 | 0,6192 |
| TcCLB.504427.100 | hypothetical protein, conserved                            | -0,09457 | 0,6534 |
| TcCLB.504741.124 | hypothetical protein, conserved                            | -0,09457 | 0,7503 |
| TcCLB.411427.10  | hypothetical protein, conserved                            | -0,09458 | 0,781  |
| TcCLB.510023.20  | mucin TcMUCII, putative                                    | -0,09459 | 0,8485 |
| TcCLB.463955.20  | mucin-associated surface protein (MASP), putative (fragm   | -0,09481 | 0,9152 |
| TcCLB.508413.68  | kinetoplastid membrane protein KMP-11                      | -0,09487 | 0,5197 |
| TcCLB.506925.319 | isocitrate dehydrogenase, putative                         | -0,0949  | 0,6091 |
| TcCLB.507381.20  | trans-sialidase (pseudogene), putative                     | -0,0949  | 0,6663 |
| TcCLB.440101.20  | activated protein kinase C receptor (pseudogene), putative | -0,09491 | 0,7653 |
| TcCLB.511445.140 | hypothetical protein                                       | -0,09496 | 0,5377 |
| TcCLB.506925.400 | hypothetical protein, conserved                            | -0,09499 | 0,4267 |
| TcCLB.506713.20  | hypothetical protein, conserved                            | -0,09508 | 0,5266 |
| TcCLB.509111.10  | hypothetical protein, conserved                            | -0,09509 | 0,5464 |
| TcCLB.508817.30  | hypothetical protein                                       | -0,09511 | 0,5736 |
| TcCLB.503529.20  | hypothetical protein, conserved                            | -0,09533 | 0,4759 |
| TcCLB.511421.60  | deoxyhypusine synthase, putative                           | -0,09536 | 0,5702 |
| TcCLB.416891.9   | protein kinase, putative                                   | -0,09539 | 0,6549 |
| TcCLB.511907.40  | hypothetical protein, conserved                            | -0,09548 | 0,6178 |
| TcCLB.506355.50  | chaperone DNAJ protein, putative                           | -0,09549 | 0,3516 |
| TcCLB.508827.90  | hypothetical protein, conserved                            | -0,09553 | 0,5974 |
| TcCLB.511517.156 | hypothetical protein, conserved                            | -0,09554 | 0,6125 |
| TcCLB.507883.50  | hypothetical protein, conserved                            | -0,09555 | 0,5952 |
| TcCLB.509967.10  | hypothetical protein, conserved                            | -0,09563 | 0,5741 |
| TcCLB.509797.50  | hypothetical protein, conserved                            | -0,0957  | 0,5909 |
| TcCLB.511269.50  | protein kinase A catalytic subunit, putative (PKAC3)       | -0,09578 | 0,7118 |
| TcCLB.509455.9   | hypothetical protein, conserved                            | -0,09585 | 0,4832 |
| TcCLB.506553.20  | bromodomain factor 2 protein                               | -0,0959  | 0,4486 |
| TcCLB.508277.50  | presenilin-like aspartic peptidase, putative               | -0,09601 | 0,4415 |
| TcCLB.510241.10  | hypothetical protein, conserved                            | -0,09605 | 0,4117 |
| TcCLB.510969.30  | hypothetical protein, conserved                            | -0,09613 | 0,727  |
| TcCLB.509797.69  | hypothetical protein, conserved (fragment)                 | -0,09621 | 0,5196 |



|                  |                                                             |          |        |
|------------------|-------------------------------------------------------------|----------|--------|
| TcCLB.506297.180 | beta-adaptin 1, putative                                    | -0,09638 | 0,4269 |
| TcCLB.508897.40  | hypothetical protein, conserved                             | -0,09654 | 0,3358 |
| TcCLB.510187.500 | serine/threonine protein phosphatase 2B catalytic subunit   | -0,09654 | 0,5287 |
| TcCLB.507809.90  | hypothetical protein, conserved                             | -0,0966  | 0,4486 |
| TcCLB.506941.210 | hypothetical protein, conserved                             | -0,09668 | 0,565  |
| TcCLB.506359.30  | hypothetical protein, conserved (pseudogene)                | -0,0967  | 0,523  |
| TcCLB.508413.76  | kinetoplastid membrane protein KMP-11                       | -0,0967  | 0,5276 |
| TcCLB.506333.19  | kinesin, putative (fragment)                                | -0,09673 | 0,3908 |
| TcCLB.509965.260 | protein kinase, putative                                    | -0,09677 | 0,5098 |
| TcCLB.508899.30  | hypothetical protein, conserved                             | -0,09679 | 0,5838 |
| TcCLB.507945.30  | pseudouridine synthase TruD, putative (fragment)            | -0,0968  | 0,4824 |
| TcCLB.506359.10  | hypothetical protein, conserved                             | -0,09688 | 0,6555 |
| TcCLB.507717.20  | hypothetical protein                                        | -0,09693 | 0,4134 |
| TcCLB.509213.80  | hypothetical protein, conserved                             | -0,09703 | 0,6165 |
| TcCLB.507925.69  | hypothetical protein, conserved                             | -0,09706 | 0,6734 |
| TcCLB.509921.60  | dispersed gene family protein 1 (DGF-1), putative           | -0,09706 | 0,7545 |
| TcCLB.505183.80  | signal recognition particle, putative                       | -0,09724 | 0,3687 |
| TcCLB.507071.277 | syntaxin binding protein (pseudogene), putative             | -0,09725 | 0,859  |
| TcCLB.508147.90  | mucin-associated surface protein (MASP, pseudogene), pu     | -0,09731 | 0,782  |
| TcCLB.511111.10  | translation initiation factor IF-2, putative                | -0,09734 | 0,2855 |
| TcCLB.508879.80  | hypothetical protein, conserved                             | -0,09734 | 0,5504 |
| TcCLB.508337.10  | hypothetical protein, conserved (fragment)                  | -0,09738 | 0,4469 |
| TcCLB.506813.70  | mucin-associated surface protein (MASP, pseudogene), pu     | -0,09739 | 0,85   |
| TcCLB.505169.10  | polyubiquitin (pseudogene), putative                        | -0,09758 | 0,5254 |
| TcCLB.509429.4   | retrotransposon hot spot (RHS) protein, putative (fragment) | -0,09768 | 0,3774 |
| TcCLB.510943.184 | tyrosine phosphatase, putative                              | -0,09786 | 0,5323 |
| TcCLB.507879.10  | trans-sialidase, Group II, putative                         | -0,09786 | 0,5576 |
| TcCLB.505025.100 | mucin TcMUCII (pseudogene), putative                        | -0,09792 | 0,8507 |
| TcCLB.510731.80  | hypothetical protein, conserved                             | -0,09797 | 0,3916 |
| TcCLB.510243.60  | hypothetical protein                                        | -0,09797 | 0,4937 |
| TcCLB.506479.50  | rRNA biogenesis protein, putative                           | -0,09798 | 0,4426 |
| TcCLB.507831.110 | pumilio/PUF RNA binding protein 2, putative (PUF2)          | -0,09799 | 0,9021 |
| TcCLB.509913.30  | hypothetical protein, conserved                             | -0,09804 | 0,342  |
| TcCLB.510517.20  | hypothetical protein, conserved                             | -0,09807 | 0,6651 |
| TcCLB.506559.260 | ATP-dependent RNA helicase, putative                        | -0,09816 | 0,3478 |
| TcCLB.503697.30  | bilobe protein, conserved                                   | -0,09817 | 0,4004 |
| TcCLB.507681.240 | hypothetical protein, conserved                             | -0,09817 | 0,4882 |
| TcCLB.509769.4   | Meckel syndrome type 1 protein, putative (fragment) (mks)   | -0,09826 | 0,5064 |
| TcCLB.503431.30  | hypothetical protein                                        | -0,09828 | 0,6534 |
| TcCLB.506329.70  | mucin TcMUCII, putative                                     | -0,09833 | 0,8932 |
| TcCLB.510351.110 | hypothetical protein                                        | -0,09842 | 0,5108 |
| TcCLB.509757.40  | hypothetical protein, conserved                             | -0,0985  | 0,6842 |
| TcCLB.503891.90  | hypothetical protein                                        | -0,09851 | 0,6136 |
| TcCLB.508325.110 | hypothetical protein, conserved                             | -0,09862 | 0,7294 |
| TcCLB.411915.10  | glycine dehydrogenase [decarboxylating] (pseudogene), pu    | -0,09862 | 0,8195 |

|                  |                                                            |          |        |
|------------------|------------------------------------------------------------|----------|--------|
| TcCLB.509891.10  | hypothetical protein, conserved                            | -0,09877 | 0,6167 |
| TcCLB.504105.40  | hypothetical protein, conserved                            | -0,09882 | 0,3734 |
| TcCLB.508537.10  | glyceraldehyde 3-phosphate dehydrogenase, cytosolic, puta  | -0,09893 | 0,7858 |
| TcCLB.507735.69  | hypothetical protein, conserved                            | -0,0991  | 0,634  |
| TcCLB.511165.60  | DNA repair protein, putative                               | -0,09911 | 0,5956 |
| TcCLB.509081.40  | surface protease GP63 (pseudogene), putative               | -0,0994  | 0,8517 |
| TcCLB.508739.40  | hypothetical protein, conserved                            | -0,09941 | 0,3442 |
| TcCLB.511451.100 | trans-sialidase (pseudogene), putative                     | -0,09944 | 0,777  |
| TcCLB.510243.54  | hypothetical protein, conserved                            | -0,09953 | 0,5524 |
| TcCLB.506789.300 | hypothetical protein, conserved                            | -0,09956 | 0,6657 |
| TcCLB.474341.9   | dynein heavy chain, putative                               | -0,09962 | 0,4596 |
| TcCLB.504129.30  | hypothetical protein, conserved                            | -0,09967 | 0,4978 |
| TcCLB.511421.155 | hypothetical protein, conserved                            | -0,09967 | 0,5417 |
| TcCLB.504045.5   | hypothetical protein, conserved (fragment)                 | -0,09996 | 0,791  |
| TcCLB.510919.9   | trans-sialidase, putative (fragment)                       | -0,09999 | 0,7872 |
| TcCLB.508837.80  | Flagellar Member 3 (FLAM3)                                 | -0,1     | 0,4476 |
| TcCLB.509453.70  | protein transport protein Sec24C, putative                 | -0,1001  | 0,316  |
| TcCLB.510533.40  | Mu-adaptin 1, putative                                     | -0,1001  | 0,4277 |
| TcCLB.507083.60  | COP9 signalosome complex subunit 5, putative               | -0,1001  | 0,6828 |
| TcCLB.504109.195 | N-acetyltransferase complex ARD1 subunit (pseudogene),     | -0,1001  | 0,8343 |
| TcCLB.509317.109 | hypothetical protein, conserved (fragment)                 | -0,1002  | 0,5243 |
| TcCLB.503977.70  | mucin-associated surface protein (MASP, pseudogene), pu    | -0,1002  | 0,8104 |
| TcCLB.509059.40  | hypothetical protein, conserved                            | -0,1003  | 0,3797 |
| TcCLB.509029.170 | palmitoyl acyltransferase 5, putative                      | -0,1003  | 0,5017 |
| TcCLB.507563.9   | dispersed gene family protein 1 (DGF-1), putative (fragme  | -0,1003  | 0,5844 |
| TcCLB.509791.10  | hypothetical protein, conserved                            | -0,1003  | 0,7267 |
| TcCLB.508175.350 | zinc finger protein family member, putative (POMP35)       | -0,1004  | 0,4961 |
| TcCLB.504741.70  | hypothetical protein, conserved                            | -0,1004  | 0,4966 |
| TcCLB.508355.270 | hypothetical protein                                       | -0,1004  | 0,4974 |
| TcCLB.510697.50  | trans-sialidase, Group VI, putative                        | -0,1004  | 0,8024 |
| TcCLB.511751.60  | hypothetical protein, conserved                            | -0,1006  | 0,3857 |
| TcCLB.509695.70  | hypothetical protein, conserved                            | -0,1006  | 0,4502 |
| TcCLB.503847.70  | hypothetical protein, conserved                            | -0,1006  | 0,4597 |
| TcCLB.506475.113 | hypothetical protein, conserved                            | -0,1007  | 0,5011 |
| TcCLB.504313.40  | hypothetical protein, conserved (pseudogene)               | -0,1007  | 0,5528 |
| TcCLB.506221.20  | hypothetical protein, conserved                            | -0,1007  | 0,6202 |
| TcCLB.506795.100 | hypothetical protein                                       | -0,1007  | 0,8146 |
| TcCLB.511233.7   | 60S ribosomal protein L10a, putative                       | -0,1008  | 0,3628 |
| TcCLB.506821.130 | hypothetical protein, conserved                            | -0,1008  | 0,4009 |
| TcCLB.504017.30  | hypothetical protein, conserved                            | -0,1008  | 0,4462 |
| TcCLB.509717.30  | hypothetical protein, conserved                            | -0,1008  | 0,4704 |
| TcCLB.510741.60  | hypothetical protein, conserved                            | -0,1008  | 0,519  |
| TcCLB.509247.60  | hypothetical protein, conserved (pseudogene)               | -0,1008  | 0,5403 |
| TcCLB.508827.30  | eukaryotic translation initiation factor, putative         | -0,1009  | 0,3173 |
| TcCLB.506155.50  | vacuolar protein sorting-associated protein-like, putative | -0,1009  | 0,5356 |

|                  |                                                            |         |        |
|------------------|------------------------------------------------------------|---------|--------|
| TcCLB.506289.20  | hypothetical protein, conserved                            | -0,1009 | 0,5616 |
| TcCLB.510659.4   | hypothetical protein, conserved                            | -0,101  | 0,6541 |
| TcCLB.506963.14  | 40S ribosomal protein S27, putative                        | -0,1012 | 0,363  |
| TcCLB.510747.40  | surface protease GP63, putative                            | -0,1012 | 0,6616 |
| TcCLB.510023.10  | hypothetical protein, conserved (pseudogene)               | -0,1012 | 0,8705 |
| TcCLB.511463.10  | rRNA dimethyltransferase, putative                         | -0,1015 | 0,5489 |
| TcCLB.511755.119 | hypothetical protein, conserved (fragment)                 | -0,1016 | 0,3122 |
| TcCLB.505999.10  | phosphate-repressible phosphate permease, putative         | -0,1017 | 0,4639 |
| TcCLB.508917.10  | protein kinase, putative                                   | -0,1017 | 0,4699 |
| TcCLB.510445.20  | chromosomal passenger protein, putative (CPC1)             | -0,1017 | 0,4976 |
| TcCLB.508979.80  | hypothetical protein, conserved                            | -0,1017 | 0,5804 |
| TcCLB.506529.340 | Protein kinase domain, putative                            | -0,1017 | 0,6127 |
| TcCLB.506177.110 | hypothetical protein, conserved                            | -0,1018 | 0,6785 |
| TcCLB.508971.30  | lysyl-tRNA synthetase, putative                            | -0,102  | 0,2088 |
| TcCLB.507073.40  | hypothetical protein, conserved                            | -0,102  | 0,2994 |
| TcCLB.506637.30  | hypothetical protein, conserved                            | -0,102  | 0,3807 |
| TcCLB.506839.34  | oxidoreductase, putative                                   | -0,102  | 0,7121 |
| TcCLB.510629.440 | hypothetical protein, conserved                            | -0,1021 | 0,2923 |
| TcCLB.511811.10  | 40S ribosomal protein S15, putative                        | -0,1021 | 0,7411 |
| TcCLB.504031.35  | mucin TcMUCII (pseudogene), putative                       | -0,1022 | 0,8707 |
| TcCLB.508949.20  | hypothetical protein, conserved                            | -0,1023 | 0,7263 |
| TcCLB.508779.20  | hypothetical protein, conserved                            | -0,1024 | 0,4661 |
| TcCLB.510329.320 | hypothetical protein, conserved                            | -0,1026 | 0,6031 |
| TcCLB.511237.100 | hypothetical protein, conserved                            | -0,1027 | 0,4742 |
| TcCLB.511297.20  | anaphase promoting complex subunit 10, putative            | -0,1027 | 0,6486 |
| TcCLB.504239.110 | mucin-associated surface protein (MASP), putative          | -0,1027 | 0,8604 |
| TcCLB.506767.371 | hypothetical protein, conserved (pseudogene)               | -0,1027 | 0,8991 |
| TcCLB.503897.70  | hypothetical protein, conserved                            | -0,1028 | 0,5354 |
| TcCLB.507963.50  | nuclear cap binding complex subunit CBP30, putative (CBP3) | -0,1028 | 0,5476 |
| TcCLB.504141.9   | calcium-translocating P-type ATPase, putative              | -0,1028 | 0,6006 |
| TcCLB.506885.330 | hypothetical protein, conserved                            | -0,103  | 0,3729 |
| TcCLB.506479.90  | hypothetical protein, conserved                            | -0,103  | 0,5214 |
| TcCLB.511737.70  | hypothetical protein, conserved                            | -0,103  | 0,5892 |
| TcCLB.506585.100 | hypothetical protein                                       | -0,103  | 0,7486 |
| TcCLB.510281.10  | hypothetical protein                                       | -0,1031 | 0,8705 |
| TcCLB.444331.10  | mucin-associated surface protein (MASP), putative          | -0,1031 | 0,8869 |
| TcCLB.506009.70  | hypothetical protein                                       | -0,1032 | 0,5744 |
| TcCLB.510187.470 | hypothetical protein                                       | -0,1032 | 0,6721 |
| TcCLB.509777.21  | hypothetical protein                                       | -0,1032 | 0,7186 |
| TcCLB.510183.20  | dipeptidyl-peptidase 8-like serine peptidase               | -0,1033 | 0,3315 |
| TcCLB.506675.99  | trans-sialidase (pseudogene), putative                     | -0,1033 | 0,8252 |
| TcCLB.503585.10  | mucin-associated surface protein (MASP), putative          | -0,1033 | 0,883  |
| TcCLB.511063.140 | trans-sialidase (pseudogene), putative                     | -0,1034 | 0,8656 |
| TcCLB.511025.20  | hypothetical protein, conserved                            | -0,1035 | 0,4801 |
| TcCLB.503953.40  | hypothetical protein, conserved                            | -0,1036 | 0,6573 |

|                  |                                                              |         |        |
|------------------|--------------------------------------------------------------|---------|--------|
| TcCLB.506883.60  | hypothetical protein, conserved                              | -0,1038 | 0,5198 |
| TcCLB.504229.37  | hypothetical protein                                         | -0,1038 | 0,8123 |
| TcCLB.510997.30  | hypothetical protein, conserved                              | -0,1039 | 0,4048 |
| TcCLB.511277.240 | vacuolar ATP synthase subunit c, putative                    | -0,1039 | 0,4239 |
| TcCLB.511039.39  | hypothetical protein, conserved                              | -0,1039 | 0,5292 |
| TcCLB.509497.9   | hypothetical protein, conserved                              | -0,1039 | 0,5958 |
| TcCLB.507047.110 | otubain cysteine peptidase, Clan CA, family C65, putative    | -0,104  | 0,4343 |
| TcCLB.511507.39  | intraflagellar transport (IFT) protein, putative (IFT20)     | -0,104  | 0,6072 |
| TcCLB.510451.21  | trans-sialidase (pseudogene), putative                       | -0,104  | 0,8606 |
| TcCLB.505169.21  | phospholipid transporting ATPase-like protein (pseudogene)   | -0,1041 | 0,809  |
| TcCLB.511871.40  | hypothetical protein, conserved                              | -0,1043 | 0,5671 |
| TcCLB.506813.10  | hypothetical protein                                         | -0,1043 | 0,6903 |
| TcCLB.507817.30  | hypothetical protein, conserved                              | -0,1044 | 0,4781 |
| TcCLB.507041.55  | mucin-associated surface protein (MASP, pseudogene), pu      | -0,1044 | 0,7972 |
| TcCLB.509831.33  | hypothetical protein, conserved                              | -0,1046 | 0,2722 |
| TcCLB.503913.20  | actin-related protein 3, putative                            | -0,1046 | 0,5053 |
| TcCLB.506961.150 | trans-sialidase, Group VIII, putative                        | -0,1046 | 0,5748 |
| TcCLB.509611.60  | hypothetical protein                                         | -0,1047 | 0,6763 |
| TcCLB.506297.330 | 40S ribosomal protein S15A, putative                         | -0,1048 | 0,2384 |
| TcCLB.508089.60  | hypothetical protein, conserved                              | -0,1048 | 0,5604 |
| TcCLB.511281.53  | hypothetical protein                                         | -0,105  | 0,8353 |
| TcCLB.509163.105 | ATP-dependent DEAD/H RNA helicase (pseudogene), putat        | -0,105  | 0,8747 |
| TcCLB.510659.70  | protein kinase-like protein, putative                        | -0,1051 | 0,4665 |
| TcCLB.508307.170 | 60S acidic ribosomal protein, putative                       | -0,1051 | 0,5395 |
| TcCLB.510351.140 | hypothetical protein, conserved                              | -0,1051 | 0,6371 |
| TcCLB.511077.95  | mucin TcMUCII (pseudogene), putative                         | -0,1051 | 0,9033 |
| TcCLB.506999.110 | hypothetical protein, conserved                              | -0,1052 | 0,3797 |
| TcCLB.508891.10  | dolichyl-P-Man:GDP-ManGlcNAc2-PP-dolichyl beta-1,4-ma        | -0,1052 | 0,6187 |
| TcCLB.504019.9   | hypothetical protein, conserved                              | -0,1052 | 0,653  |
| TcCLB.506717.4   | hypothetical protein, conserved (fragment)                   | -0,1052 | 0,7116 |
| TcCLB.508277.65  | hypothetical protein, conserved                              | -0,1053 | 0,4795 |
| TcCLB.509955.10  | ubiquitin carboxyl-terminal hydrolase, putative (fragment)   | -0,1053 | 0,6867 |
| TcCLB.510167.37  | trans-sialidase (pseudogene), putative                       | -0,1054 | 0,842  |
| TcCLB.508181.20  | 6-phosphofructo-2-kinase 1                                   | -0,1057 | 0,3336 |
| TcCLB.509967.60  | hypothetical protein, conserved                              | -0,1057 | 0,5372 |
| TcCLB.507623.90  | hypothetical protein, conserved                              | -0,1058 | 0,4034 |
| TcCLB.507009.60  | hypothetical protein, conserved                              | -0,1059 | 0,3338 |
| TcCLB.503789.10  | hypothetical protein                                         | -0,106  | 0,6529 |
| TcCLB.510315.40  | Putative intraflagellar transport protein C3 (fragment) (PIF | -0,1061 | 0,4502 |
| TcCLB.435519.10  | DNA replication licensing factor MCM6, putative              | -0,1062 | 0,6873 |
| TcCLB.506763.340 | mucin TcMUCII, putative                                      | -0,1062 | 0,8592 |
| TcCLB.510609.60  | hypothetical protein, conserved                              | -0,1064 | 0,3342 |
| TcCLB.507507.30  | hypothetical protein, conserved                              | -0,1064 | 0,4637 |
| TcCLB.508461.130 | elongation factor 1-alpha (ef-1-alpha), putative             | -0,1065 | 0,2939 |
| TcCLB.510691.20  | hypothetical protein, conserved                              | -0,1065 | 0,3947 |

|                  |                                                         |         |        |
|------------------|---------------------------------------------------------|---------|--------|
| TcCLB.510105.180 | hypothetical protein, conserved                         | -0,1065 | 0,4437 |
| TcCLB.508919.20  | hypothetical protein, conserved                         | -0,1066 | 0,3518 |
| TcCLB.506933.24  | hypothetical protein, conserved                         | -0,1066 | 0,5116 |
| TcCLB.508837.100 | hypothetical protein, conserved                         | -0,1066 | 0,6158 |
| TcCLB.424771.10  | retrotransposon hot spot (RHS) protein, putative        | -0,1068 | 0,7588 |
| TcCLB.507017.110 | hypothetical protein, conserved                         | -0,1069 | 0,4439 |
| TcCLB.509827.4   | retrotransposon hot spot (RHS) protein, putative        | -0,1069 | 0,6657 |
| TcCLB.450061.10  | hypothetical protein, conserved                         | -0,107  | 0,4198 |
| TcCLB.511247.9   | hypothetical protein, conserved                         | -0,1072 | 0,8428 |
| TcCLB.506925.330 | hypothetical protein, conserved                         | -0,1073 | 0,2581 |
| TcCLB.509455.60  | hypothetical protein, conserved                         | -0,1074 | 0,4972 |
| TcCLB.503783.34  | mucin-associated surface protein (MASP, pseudogene), pu | -0,1074 | 0,7887 |
| TcCLB.506303.171 | hypothetical protein, conserved                         | -0,1074 | 0,8191 |
| TcCLB.506167.30  | hypothetical protein, conserved                         | -0,1075 | 0,5976 |
| TcCLB.511517.153 | SH3 domain protein, putative                            | -0,1076 | 0,3971 |
| TcCLB.511421.100 | Enkuring domain-containig protein                       | -0,1078 | 0,3503 |
| TcCLB.510055.100 | hypothetical protein, conserved                         | -0,1079 | 0,3536 |
| TcCLB.504125.70  | hypothetical protein, conserved                         | -0,1079 | 0,5487 |
| TcCLB.510359.34  | hypothetical protein, conserved                         | -0,1079 | 0,6022 |
| TcCLB.507295.20  | mucin-associated surface protein (MASP), putative       | -0,1079 | 0,7609 |
| TcCLB.510807.30  | hypothetical protein                                    | -0,1079 | 0,7773 |
| TcCLB.506213.40  | hypothetical protein, conserved                         | -0,108  | 0,2584 |
| TcCLB.511859.20  | hypothetical protein, conserved                         | -0,108  | 0,5255 |
| TcCLB.503729.19  | hypothetical protein (fragment)                         | -0,108  | 0,5558 |
| TcCLB.506755.130 | hypothetical protein, conserved                         | -0,1081 | 0,6806 |
| TcCLB.509055.30  | hypothetical protein, conserved                         | -0,1082 | 0,4689 |
| TcCLB.507923.20  | U3 small nuclear ribonucleoprotein (snRNP), putative    | -0,1083 | 0,2595 |
| TcCLB.510259.24  | hypothetical protein, conserved                         | -0,1083 | 0,5817 |
| TcCLB.507775.10  | hypothetical protein, conserved                         | -0,1084 | 0,523  |
| TcCLB.506839.89  | mitochondrial chaperone BCS1, putative (fragment)       | -0,1084 | 0,6443 |
| TcCLB.506271.10  | ATP-dependent DEAD/H RNA helicase (pseudogene), putat   | -0,1084 | 0,7171 |
| TcCLB.509813.10  | hypothetical protein (pseudogene)                       | -0,1085 | 0,821  |
| TcCLB.510517.70  | hypothetical protein, conserved                         | -0,1086 | 0,3055 |
| TcCLB.510241.20  | hypothetical protein, conserved                         | -0,1086 | 0,3758 |
| TcCLB.510121.9   | hypothetical protein, conserved                         | -0,1086 | 0,6875 |
| TcCLB.504179.40  | hypothetical protein, conserved                         | -0,1088 | 0,3305 |
| TcCLB.506989.100 | Triple RNA binding domain protein 3                     | -0,1088 | 0,4577 |
| TcCLB.511923.49  | mucin-associated surface protein (MASP, pseudogene), pu | -0,1088 | 0,9196 |
| TcCLB.511545.170 | hypothetical protein, conserved                         | -0,1089 | 0,5478 |
| TcCLB.507023.190 | DNA-J protein, putative                                 | -0,1089 | 0,561  |
| TcCLB.510329.350 | hypothetical protein, conserved                         | -0,1092 | 0,4688 |
| TcCLB.509251.20  | trans-sialidase, Group V, putative                      | -0,1092 | 0,6965 |
| TcCLB.506201.20  | 60S ribosomal protein L13a, putative                    | -0,1093 | 0,2991 |
| TcCLB.510231.29  | multidrug resistance-associated protein, putative       | -0,1094 | 0,4297 |
| TcCLB.506265.10  | hypothetical protein, conserved                         | -0,1094 | 0,5727 |

|                  |                                                             |         |        |
|------------------|-------------------------------------------------------------|---------|--------|
| TcCLB.503777.10  | suppressive immunomodulating factor, putative (TSIF)        | -0,1095 | 0,3768 |
| TcCLB.510339.50  | spermidine synthase, putative                               | -0,1095 | 0,4309 |
| TcCLB.511075.60  | protein kinase, putative                                    | -0,1097 | 0,5507 |
| TcCLB.510623.50  | mucin-associated surface protein (MASP, pseudogene), pu     | -0,1099 | 0,7724 |
| TcCLB.506769.4   | mucin-associated surface protein (MASP, pseudogene), pu     | -0,1099 | 0,8329 |
| TcCLB.506007.20  | RNA editing complex protein MP18, putative                  | -0,11   | 0,5015 |
| TcCLB.507089.120 | hypothetical protein, conserved                             | -0,11   | 0,6573 |
| TcCLB.507159.30  | hypothetical protein, conserved                             | -0,1101 | 0,342  |
| TcCLB.510687.70  | hypothetical protein, conserved                             | -0,1101 | 0,6097 |
| TcCLB.508771.10  | cysteine peptidase, Clan CA, family C51, putative           | -0,1102 | 0,7847 |
| TcCLB.510303.100 | hypothetical protein, conserved                             | -0,1103 | 0,4563 |
| TcCLB.510903.50  | phosphonopyruvate decarboxylase, putative                   | -0,1103 | 0,4586 |
| TcCLB.508777.150 | hypothetical protein                                        | -0,1103 | 0,4779 |
| TcCLB.508207.135 | hypothetical protein, conserved                             | -0,1104 | 0,4955 |
| TcCLB.506813.220 | trans-sialidase, Group V, putative                          | -0,1104 | 0,7922 |
| TcCLB.503855.30  | adenylosuccinate lyase, putative (ADSL)                     | -0,1105 | 0,3237 |
| TcCLB.508689.20  | hypothetical protein, conserved                             | -0,1105 | 0,3466 |
| TcCLB.507001.140 | hypothetical protein, conserved                             | -0,1105 | 0,483  |
| TcCLB.509747.10  | hypothetical protein, conserved                             | -0,1105 | 0,6414 |
| TcCLB.508221.870 | trans-sialidase, Group V, putative                          | -0,1105 | 0,7636 |
| TcCLB.511649.80  | myosin heavy chain, putative                                | -0,1106 | 0,3442 |
| TcCLB.506127.110 | eukaryotic peptide chain release factor subunit 1, putative | -0,1107 | 0,2874 |
| TcCLB.511245.170 | hypothetical protein, conserved                             | -0,1107 | 0,3284 |
| TcCLB.511469.90  | hypothetical protein                                        | -0,1107 | 0,5925 |
| TcCLB.504127.10  | surface protease GP63 (pseudogene), putative                | -0,1107 | 0,7579 |
| TcCLB.510363.320 | mucin-associated surface protein (MASP), putative           | -0,1108 | 0,6266 |
| TcCLB.507709.130 | hypothetical protein, conserved                             | -0,1109 | 0,5557 |
| TcCLB.506793.60  | hypothetical protein, conserved                             | -0,111  | 0,4765 |
| TcCLB.511171.90  | mucin-associated surface protein (MASP), putative           | -0,111  | 0,8812 |
| TcCLB.504157.50  | DnaJ chaperone protein, putative                            | -0,1111 | 0,4841 |
| TcCLB.508227.20  | mucin-associated surface protein (MASP), putative           | -0,1111 | 0,7638 |
| TcCLB.506203.129 | DNA-directed RNA polymerase, mitochondrial (fragment)       | -0,1112 | 0,2965 |
| TcCLB.504103.109 | hypothetical protein, conserved                             | -0,1112 | 0,5364 |
| TcCLB.509051.60  | ubiquitin-protein ligase, putative (fragment)               | -0,1112 | 0,7383 |
| TcCLB.503459.20  | hypothetical protein, conserved                             | -0,1113 | 0,5029 |
| TcCLB.509779.40  | hypothetical protein, conserved                             | -0,1114 | 0,573  |
| TcCLB.506855.310 | hypothetical protein, conserved                             | -0,1115 | 0,2609 |
| TcCLB.511869.9   | dynein heavy chain, putative (fragment)                     | -0,1115 | 0,4339 |
| TcCLB.504045.50  | hypothetical protein                                        | -0,1117 | 0,4478 |
| TcCLB.509117.19  | hypothetical protein, conserved                             | -0,1118 | 0,5008 |
| TcCLB.508355.50  | hypothetical protein, conserved                             | -0,1118 | 0,5649 |
| TcCLB.508409.180 | hypothetical protein, conserved                             | -0,1119 | 0,3001 |
| TcCLB.509831.40  | hypothetical protein, conserved                             | -0,1119 | 0,5386 |
| TcCLB.510661.160 | hypothetical protein, conserved                             | -0,1119 | 0,5444 |
| TcCLB.507991.60  | mismatch repair protein MLH1, putative                      | -0,112  | 0,4518 |

|                  |                                                            |         |        |
|------------------|------------------------------------------------------------|---------|--------|
| TcCLB.506885.300 | hypothetical protein, conserved                            | -0,112  | 0,5962 |
| TcCLB.510065.40  | hypothetical protein, conserved                            | -0,1122 | 0,2479 |
| TcCLB.511787.30  | hypothetical protein, conserved (pseudogene)               | -0,1122 | 0,721  |
| TcCLB.508919.30  | hypothetical protein, conserved                            | -0,1123 | 0,5352 |
| TcCLB.511391.100 | hypothetical protein, conserved                            | -0,1123 | 0,5735 |
| TcCLB.510323.30  | 60S ribosomal protein L13, putative                        | -0,1124 | 0,2148 |
| TcCLB.506885.110 | hypothetical protein, conserved                            | -0,1125 | 0,2264 |
| TcCLB.509937.140 | hypothetical protein, conserved                            | -0,1125 | 0,5014 |
| TcCLB.506741.60  | mucin-associated surface protein (MASP), putative          | -0,1125 | 0,8175 |
| TcCLB.508027.60  | hypothetical protein                                       | -0,1126 | 0,3464 |
| TcCLB.509437.50  | AAA ATPase, putative                                       | -0,1127 | 0,3906 |
| TcCLB.509901.110 | hypothetical protein, conserved                            | -0,1127 | 0,5759 |
| TcCLB.506489.30  | hypothetical protein, conserved                            | -0,1129 | 0,3582 |
| TcCLB.510325.10  | ubiquitin hydrolase, putative                              | -0,1129 | 0,4562 |
| TcCLB.511277.270 | tubulin cofactor C domain-containing protein RP2, putative | -0,113  | 0,3332 |
| TcCLB.509233.40  | hypothetical protein, conserved                            | -0,113  | 0,5369 |
| TcCLB.505071.50  | hypothetical protein, conserved                            | -0,113  | 0,5966 |
| TcCLB.508641.210 | hypothetical protein, conserved                            | -0,1132 | 0,5926 |
| TcCLB.510175.10  | retrotransposon hot spot protein (RHS, pseudogene), putat  | -0,1132 | 0,703  |
| TcCLB.506997.9   | dispersed gene family protein 1 (DGF-1), putative          | -0,1132 | 0,7788 |
| TcCLB.506397.10  | trans-sialidase, Group II, putative                        | -0,1132 | 0,9522 |
| TcCLB.508319.30  | hypothetical protein, conserved                            | -0,1133 | 0,1908 |
| TcCLB.507213.20  | protein kinase, putative                                   | -0,1134 | 0,4986 |
| TcCLB.507505.20  | DnaJ chaperone protein (pseudogene), putative              | -0,1135 | 0,4604 |
| TcCLB.511229.39  | hypothetical protein, conserved                            | -0,1136 | 0,6525 |
| TcCLB.508605.40  | retrotransposon hot spot protein (RHS, pseudogene), putat  | -0,1137 | 0,6276 |
| TcCLB.506457.110 | hypothetical protein, conserved                            | -0,1138 | 0,4649 |
| TcCLB.509379.29  | hypothetical protein, conserved                            | -0,1138 | 0,6499 |
| TcCLB.508355.330 | hypothetical protein, conserved                            | -0,1139 | 0,2308 |
| TcCLB.506203.30  | SWI/SNF-related matrix-associated actin-dependent regul    | -0,114  | 0,3165 |
| TcCLB.511585.60  | hypothetical protein, conserved                            | -0,114  | 0,5189 |
| TcCLB.511031.30  | hypothetical protein, conserved                            | -0,1141 | 0,5119 |
| TcCLB.503759.59  | hypothetical protein, conserved                            | -0,1141 | 0,5211 |
| TcCLB.506477.30  | tubulin-tyrosine ligase, putative                          | -0,1142 | 0,4345 |
| TcCLB.510601.20  | hypothetical protein, conserved                            | -0,1142 | 0,4763 |
| TcCLB.506265.190 | hypothetical protein, conserved                            | -0,1143 | 0,4765 |
| TcCLB.504153.10  | hypothetical protein, conserved                            | -0,1143 | 0,6198 |
| TcCLB.509937.120 | hypothetical protein, conserved                            | -0,1143 | 0,664  |
| TcCLB.509001.10  | hypothetical protein, conserved                            | -0,1144 | 0,3718 |
| TcCLB.506467.20  | hypothetical protein, conserved                            | -0,1144 | 0,3942 |
| TcCLB.511143.12  | hypothetical protein, conserved                            | -0,1146 | 0,3656 |
| TcCLB.507305.11  | casein kinase (pseudogene), putative                       | -0,1147 | 0,1448 |
| TcCLB.511725.160 | hypothetical protein, conserved                            | -0,1147 | 0,1926 |
| TcCLB.510885.60  | hypothetical protein, conserved                            | -0,1147 | 0,302  |
| TcCLB.511909.70  | hypothetical protein, conserved                            | -0,1147 | 0,5637 |

|                  |                                                           |         |         |
|------------------|-----------------------------------------------------------|---------|---------|
| TcCLB.511761.50  | sodium/hydrogen exchanger, putative (FTP)                 | -0,1148 | 0,4366  |
| TcCLB.440099.10  | hypothetical protein                                      | -0,1148 | 0,5276  |
| TcCLB.511865.50  | hypothetical protein, conserved                           | -0,1148 | 0,5692  |
| TcCLB.506767.70  | mucin-associated surface protein (MASP), putative         | -0,115  | 0,7884  |
| TcCLB.510431.210 | vesicular protein trafficking mediator, putative          | -0,1151 | 0,4549  |
| TcCLB.503899.30  | 40S ribosomal protein S16, putative                       | -0,1151 | 0,5901  |
| TcCLB.511109.60  | hypothetical protein, conserved                           | -0,1152 | 0,2984  |
| TcCLB.506833.40  | hypothetical protein                                      | -0,1154 | 0,4569  |
| TcCLB.509695.170 | 60S ribosomal protein L9, putative                        | -0,1155 | 0,09336 |
| TcCLB.503449.20  | copper homeostasis protein, putative                      | -0,1155 | 0,4642  |
| TcCLB.507095.20  | hypothetical protein                                      | -0,1155 | 0,8085  |
| TcCLB.510647.40  | syntaxin, putative                                        | -0,1156 | 0,4493  |
| TcCLB.503993.10  | trans-sialidase, Group I, putative                        | -0,1157 | 0,5312  |
| TcCLB.508539.71  | elongation factor 1-gamma (EF-1-gamma, pseudogene), p     | -0,1157 | 0,7556  |
| TcCLB.507023.140 | hypothetical protein                                      | -0,1158 | 0,5562  |
| TcCLB.509965.110 | importin alpha, putative                                  | -0,1159 | 0,2221  |
| TcCLB.510327.10  | hypothetical protein                                      | -0,1159 | 0,7934  |
| TcCLB.511847.60  | mitochondrial DNA polymerase I protein B, putative (POLIE | -0,116  | 0,2934  |
| TcCLB.506561.14  | hypothetical protein, conserved                           | -0,116  | 0,5985  |
| TcCLB.510021.160 | 90 kDa surface protein, putative                          | -0,116  | 0,7894  |
| TcCLB.506563.160 | hypothetical protein, conserved                           | -0,1162 | 0,3034  |
| TcCLB.509081.166 | trans-sialidase, putative (fragment)                      | -0,1163 | 0,8322  |
| TcCLB.506211.230 | hypothetical protein, conserved                           | -0,1164 | 0,4428  |
| TcCLB.509583.4   | 60S ribosomal protein L44, putative                       | -0,1165 | 0,2184  |
| TcCLB.508277.190 | ERAD-associated E3 ubiquitin-protein ligase HRD1, putativ | -0,1165 | 0,2583  |
| TcCLB.507839.40  | trans-sialidase, Group II, putative                       | -0,1166 | 0,5528  |
| TcCLB.510967.10  | GPI inositol deacylase precursor, putative                | -0,1166 | 0,5957  |
| TcCLB.506775.70  | hypothetical protein, conserved                           | -0,1167 | 0,4234  |
| TcCLB.442801.10  | mucin TcMUCII, putative                                   | -0,1167 | 0,8439  |
| TcCLB.506835.99  | hypothetical protein, conserved                           | -0,1168 | 0,1856  |
| TcCLB.507049.20  | hypothetical protein                                      | -0,1168 | 0,5223  |
| TcCLB.508307.50  | hypothetical protein, conserved                           | -0,1169 | 0,385   |
| TcCLB.508139.10  | retrotransposon hot spot (RHS) protein, putative          | -0,1171 | 0,6187  |
| TcCLB.509671.168 | hypothetical protein, conserved                           | -0,1171 | 0,6311  |
| TcCLB.510197.80  | hypothetical protein, conserved                           | -0,1172 | 0,687   |
| TcCLB.506741.135 | mucin TcMUCII (pseudogene), putative                      | -0,1173 | 0,809   |
| TcCLB.428403.5   | hypothetical protein, conserved                           | -0,1174 | 0,5155  |
| TcCLB.511533.10  | hypothetical protein, conserved                           | -0,1175 | 0,4382  |
| TcCLB.508579.10  | hypothetical protein, conserved                           | -0,1176 | 0,5556  |
| TcCLB.506531.30  | hypothetical protein, conserved                           | -0,1177 | 0,4806  |
| TcCLB.506911.20  | mucin-associated surface protein (MASP), putative         | -0,1177 | 0,6322  |
| TcCLB.507611.40  | protein kinase, putative                                  | -0,1178 | 0,845   |
| TcCLB.508029.30  | ATP dependent DEAD-box helicase, putative (RH)            | -0,118  | 0,2902  |
| TcCLB.506715.50  | SNARE domain-containing protein, putative (SNARE2.2)      | -0,118  | 0,4482  |
| TcCLB.507709.80  | hypothetical protein, conserved                           | -0,118  | 0,4809  |



|                  |                                                               |         |        |
|------------------|---------------------------------------------------------------|---------|--------|
| TcCLB.511923.100 | trans-sialidase (pseudogene), putative                        | -0,118  | 0,6438 |
| TcCLB.507519.90  | hypothetical protein, conserved                               | -0,1181 | 0,5216 |
| TcCLB.510823.40  | hypothetical protein, conserved                               | -0,1182 | 0,2772 |
| TcCLB.511001.100 | SNF-7-like protein, putative                                  | -0,1182 | 0,4016 |
| TcCLB.508323.80  | aquaporin, putative                                           | -0,1182 | 0,5343 |
| TcCLB.507539.49  | hypothetical protein, conserved                               | -0,1183 | 0,6992 |
| TcCLB.508629.10  | dispersed gene family protein 1 (DGF-1), putative             | -0,1184 | 0,4976 |
| TcCLB.506989.130 | hypothetical protein, conserved                               | -0,1185 | 0,2882 |
| TcCLB.503839.19  | hypothetical protein, conserved                               | -0,1185 | 0,4486 |
| TcCLB.508937.10  | dispersed gene family protein 1 (DGF-1, pseudogene), putative | -0,1185 | 0,7058 |
| TcCLB.508221.750 | trans-sialidase, Group V, putative                            | -0,1185 | 0,7582 |
| TcCLB.510579.30  | hypothetical protein, conserved                               | -0,1186 | 0,2443 |
| TcCLB.507949.29  | conserved protein, unknown function                           | -0,1188 | 0,5353 |
| TcCLB.503785.20  | hypothetical protein, conserved                               | -0,1188 | 0,5562 |
| TcCLB.511871.4   | dynein heavy chain, putative                                  | -0,1188 | 0,6064 |
| TcCLB.508809.50  | hypothetical protein                                          | -0,1188 | 0,7058 |
| TcCLB.506503.150 | histone H3 variant, putative                                  | -0,1189 | 0,3586 |
| TcCLB.508833.10  | hypothetical protein                                          | -0,1189 | 0,6443 |
| TcCLB.511115.20  | GTP-binding elongation factor Tu family, putative             | -0,119  | 0,2768 |
| TcCLB.509967.160 | epsilon tubulin, putative                                     | -0,119  | 0,3892 |
| TcCLB.511025.120 | CYC2-like cyclin, putative                                    | -0,1192 | 0,3661 |
| TcCLB.511001.210 | hypothetical protein, conserved                               | -0,1192 | 0,4804 |
| TcCLB.509875.180 | hypothetical protein                                          | -0,1192 | 0,545  |
| TcCLB.508777.170 | hypothetical protein, conserved                               | -0,1193 | 0,4817 |
| TcCLB.506525.10  | nuclear segregation protein, putative                         | -0,1194 | 0,124  |
| TcCLB.508289.80  | trans-sialidase (pseudogene), putative                        | -0,1194 | 0,8048 |
| TcCLB.511173.200 | hypothetical protein                                          | -0,1194 | 0,8235 |
| TcCLB.510315.30  | hypothetical protein, conserved                               | -0,1196 | 0,5462 |
| TcCLB.511751.250 | hypothetical protein, conserved                               | -0,1197 | 0,5387 |
| TcCLB.507077.50  | hypothetical protein, conserved                               | -0,1197 | 0,5416 |
| TcCLB.503893.140 | hypothetical protein, conserved                               | -0,1198 | 0,4937 |
| TcCLB.510421.240 | diacylglycerol acyltransferase, putative                      | -0,1198 | 0,5243 |
| TcCLB.442495.10  | cyclic nucleotide-binding domain containing protein, putative | -0,1199 | 0,5277 |
| TcCLB.510073.40  | hypothetical protein, conserved                               | -0,1199 | 0,6851 |
| TcCLB.510265.70  | hypothetical protein, conserved                               | -0,12   | 0,2055 |
| TcCLB.508909.80  | hypothetical protein                                          | -0,1201 | 0,5397 |
| TcCLB.507523.60  | mucin-associated surface protein (MASP), putative             | -0,1201 | 0,833  |
| TcCLB.511627.140 | hypothetical protein, conserved                               | -0,1202 | 0,4662 |
| TcCLB.511255.529 | surface protease GP63 (pseudogene), putative                  | -0,1202 | 0,7545 |
| TcCLB.508307.20  | hypothetical protein, conserved                               | -0,1205 | 0,4903 |
| TcCLB.511647.50  | hypothetical protein, conserved                               | -0,1206 | 0,4618 |
| TcCLB.511727.70  | hypothetical protein, conserved                               | -0,1207 | 0,3342 |
| TcCLB.510617.10  | hypothetical protein, conserved                               | -0,1207 | 0,5621 |
| TcCLB.506943.10  | mitogen-activated protein kinase 5, putative                  | -0,1207 | 0,578  |
| TcCLB.506599.35  | hypothetical protein, conserved (pseudogene)                  | -0,1208 | 0,7949 |

|                  |                                                           |         |        |
|------------------|-----------------------------------------------------------|---------|--------|
| TcCLB.510339.20  | hypothetical protein                                      | -0,1209 | 0,3784 |
| TcCLB.508777.180 | prefoldin subunit 2, putative                             | -0,1209 | 0,4343 |
| TcCLB.510747.140 | hypothetical protein, conserved                           | -0,1209 | 0,5169 |
| TcCLB.507019.80  | hypothetical protein, conserved                           | -0,121  | 0,1665 |
| TcCLB.510885.140 | hypothetical protein                                      | -0,121  | 0,4862 |
| TcCLB.511115.49  | hypothetical protein, conserved                           | -0,121  | 0,7119 |
| TcCLB.506503.110 | DNA-directed RNA polymerases I and III subunit RPAC1, pu  | -0,1211 | 0,4159 |
| TcCLB.506577.40  | hypothetical protein, conserved                           | -0,1211 | 0,4762 |
| TcCLB.507017.80  | hypothetical protein                                      | -0,1211 | 0,5772 |
| TcCLB.509527.70  | mucin TcMUCII, putative                                   | -0,1211 | 0,8239 |
| TcCLB.510889.170 | hypothetical protein, conserved                           | -0,1212 | 0,2132 |
| TcCLB.509039.30  | hypothetical protein, conserved                           | -0,1212 | 0,4065 |
| TcCLB.510731.110 | hypothetical protein, conserved                           | -0,1212 | 0,5282 |
| TcCLB.511355.24  | hypothetical protein, conserved                           | -0,1212 | 0,5558 |
| TcCLB.511167.110 | hypothetical protein, conserved                           | -0,1213 | 0,3881 |
| TcCLB.506925.220 | hypothetical protein, conserved                           | -0,1213 | 0,3882 |
| TcCLB.507257.170 | hypothetical protein, conserved                           | -0,1213 | 0,486  |
| TcCLB.508193.20  | retrotransposon hot spot protein (RHS, pseudogene), putat | -0,1214 | 0,239  |
| TcCLB.506363.40  | hypothetical protein, conserved                           | -0,1214 | 0,5156 |
| TcCLB.506599.420 | mucin-associated surface protein (MASP), putative         | -0,1214 | 0,8341 |
| TcCLB.507541.30  | casein kinase, putative                                   | -0,1215 | 0,1721 |
| TcCLB.509877.20  | hypothetical protein, conserved                           | -0,1217 | 0,3706 |
| TcCLB.506263.40  | hypothetical protein, conserved                           | -0,1217 | 0,4845 |
| TcCLB.507775.40  | hypothetical protein, conserved                           | -0,1217 | 0,5358 |
| TcCLB.509237.40  | hypothetical protein, conserved                           | -0,1217 | 0,5454 |
| TcCLB.508977.31  | elongation factor 1-gamma (EF-1-gamma, pseudogene), p     | -0,1218 | 0,767  |
| TcCLB.505807.260 | hypothetical protein, conserved                           | -0,1219 | 0,4263 |
| TcCLB.508139.140 | dispersed gene family protein 1 (DGF-1), putative         | -0,1219 | 0,4896 |
| TcCLB.511049.20  | hypothetical protein, conserved                           | -0,122  | 0,4976 |
| TcCLB.508283.60  | retrotransposon hot spot protein (RHS, pseudogene), putat | -0,122  | 0,7397 |
| TcCLB.510453.9   | dispersed gene family protein 1 (DGF-1), putative         | -0,122  | 0,7839 |
| TcCLB.506761.19  | mucin TcMUCII, putative                                   | -0,1221 | 0,8432 |
| TcCLB.503923.50  | GPI transamidase subunit 16, putative (fragment) (GPI16)  | -0,1222 | 0,382  |
| TcCLB.507655.9   | dispersed gene family protein 1 (DGF-1), putative         | -0,1222 | 0,7349 |
| TcCLB.508601.60  | hypothetical protein, conserved                           | -0,1223 | 0,4685 |
| TcCLB.503999.40  | hypothetical protein, conserved                           | -0,1224 | 0,3197 |
| TcCLB.504157.120 | hypothetical protein, conserved                           | -0,1224 | 0,5793 |
| TcCLB.510289.30  | phosphatidylinositol-4-phosphate 5-kinase, putative       | -0,1225 | 0,5001 |
| TcCLB.510701.10  | mucin-associated surface protein (MASP), putative         | -0,1225 | 0,7625 |
| TcCLB.503575.27  | hypothetical protein, conserved                           | -0,1226 | 0,347  |
| TcCLB.508897.90  | hypothetical protein, conserved                           | -0,1226 | 0,3548 |
| TcCLB.506763.110 | trans-sialidase, Group VII, putative                      | -0,1226 | 0,8407 |
| TcCLB.511731.20  | hypothetical protein, conserved                           | -0,1227 | 0,3131 |
| TcCLB.510529.10  | hypothetical protein, conserved                           | -0,1227 | 0,5157 |
| TcCLB.503655.20  | dispersed gene family protein 1 (DGF-1), putative         | -0,1228 | 0,4469 |

|                  |                                                           |         |        |
|------------------|-----------------------------------------------------------|---------|--------|
| TcCLB.510355.97  | retrotransposon hot spot protein (RHS, pseudogene), putat | -0,123  | 0,8427 |
| TcCLB.506943.100 | hypothetical protein, conserved                           | -0,1231 | 0,25   |
| TcCLB.507677.60  | hypothetical protein                                      | -0,1231 | 0,3084 |
| TcCLB.511423.40  | TFIIH basal transcription factor subunit, putative (TSP1) | -0,1231 | 0,4542 |
| TcCLB.504179.9   | pre-mRNA splicing factor ATP-dependent RNA helicase, pu   | -0,1231 | 0,578  |
| TcCLB.507951.160 | succinate dehydrogenase flavoprotein subunit              | -0,1232 | 0,1385 |
| TcCLB.506181.59  | 40S ribosomal protein S12, putative                       | -0,1232 | 0,1924 |
| TcCLB.508647.140 | DNA replication licensing factor MCM5, putative           | -0,1232 | 0,2859 |
| TcCLB.509965.400 | hypothetical protein, conserved                           | -0,1232 | 0,3185 |
| TcCLB.408799.10  | hypothetical protein, conserved                           | -0,1233 | 0,5844 |
| TcCLB.511735.60  | superoxide dismutase, putative                            | -0,1234 | 0,4201 |
| TcCLB.508831.70  | U5 snRNP-specific 40 kDa protein, putative                | -0,1235 | 0,4502 |
| TcCLB.510835.50  | hypothetical protein, conserved                           | -0,1235 | 0,5067 |
| TcCLB.507209.40  | cdc2-related kinase 9 (CRK9)                              | -0,1236 | 0,27   |
| TcCLB.508851.140 | hypothetical protein, conserved                           | -0,1236 | 0,4976 |
| TcCLB.506537.250 | hypothetical protein, conserved                           | -0,1236 | 0,629  |
| TcCLB.511731.80  | hypothetical protein, conserved                           | -0,1237 | 0,3878 |
| TcCLB.510667.30  | hypothetical protein, conserved                           | -0,1238 | 0,3118 |
| TcCLB.508817.5   | dynein heavy chain, putative                              | -0,1238 | 0,5453 |
| TcCLB.510105.150 | hypothetical protein, conserved                           | -0,1238 | 0,5918 |
| TcCLB.510903.20  | hypothetical protein, conserved                           | -0,1239 | 0,6181 |
| TcCLB.510513.60  | hypothetical protein, conserved                           | -0,124  | 0,5186 |
| TcCLB.504017.60  | hypothetical protein, conserved                           | -0,1241 | 0,4878 |
| TcCLB.511529.110 | hypothetical protein, conserved                           | -0,1241 | 0,5763 |
| TcCLB.503441.5   | trans-sialidase, putative (fragment)                      | -0,1242 | 0,7486 |
| TcCLB.509937.220 | protein kinase, putative                                  | -0,1242 | 0,8305 |
| TcCLB.511487.19  | trans-sialidase (pseudogene), putative                    | -0,1244 | 0,264  |
| TcCLB.510187.448 | hypothetical protein, conserved                           | -0,1245 | 0,1784 |
| TcCLB.510355.190 | hypothetical protein                                      | -0,1245 | 0,5256 |
| TcCLB.504411.30  | serine/threonine protein kinase, putative                 | -0,1245 | 0,6151 |
| TcCLB.506127.160 | hypothetical protein, conserved                           | -0,1246 | 0,3725 |
| TcCLB.508153.164 | hypothetical protein, conserved                           | -0,1247 | 0,4196 |
| TcCLB.506223.130 | hypothetical protein, conserved                           | -0,1247 | 0,4701 |
| TcCLB.509233.70  | Spastin, putative                                         | -0,1248 | 0,302  |
| TcCLB.506303.111 | hypothetical protein, conserved                           | -0,1248 | 0,3098 |
| TcCLB.504031.60  | mucin-associated surface protein (MASP, pseudogene), pu   | -0,1248 | 0,7773 |
| TcCLB.506367.20  | hypothetical protein, conserved                           | -0,1249 | 0,3169 |
| TcCLB.507951.90  | hypothetical protein, conserved                           | -0,1249 | 0,4324 |
| TcCLB.506303.140 | hypothetical protein, conserved                           | -0,125  | 0,3634 |
| TcCLB.511261.130 | hypothetical protein, conserved                           | -0,125  | 0,5148 |
| TcCLB.506691.40  | hypothetical protein, conserved                           | -0,1251 | 0,5087 |
| TcCLB.510885.40  | WD repeat and HMG-box DNA-binding protein, putative       | -0,1252 | 0,2046 |
| TcCLB.503447.60  | beta galactofuranosyl glycosyltransferase, putative       | -0,1252 | 0,8212 |
| TcCLB.511585.100 | hypothetical protein, conserved                           | -0,1253 | 0,5939 |
| TcCLB.510377.500 | trans-sialidase (pseudogene), putative                    | -0,1253 | 0,8343 |

|                  |                                                                  |         |        |
|------------------|------------------------------------------------------------------|---------|--------|
| TcCLB.505843.30  | DNA repair protein Rad9, putative (Rad9)                         | -0,1254 | 0,2759 |
| TcCLB.509429.150 | hypothetical protein, conserved                                  | -0,1254 | 0,3767 |
| TcCLB.504351.41  | ATP-dependent DEAD/H RNA helicase (pseudogene), putative         | -0,1255 | 0,7773 |
| TcCLB.509251.98  | hypothetical protein, conserved (pseudogene)                     | -0,1257 | 0,7773 |
| TcCLB.509809.30  | hypothetical protein, conserved                                  | -0,1258 | 0,2143 |
| TcCLB.503697.60  | nuclear cap binding complex subunit CBP110, putative (CBI)       | -0,1258 | 0,2592 |
| TcCLB.511217.160 | hypothetical protein, conserved                                  | -0,1258 | 0,3726 |
| TcCLB.506755.10  | hypothetical protein, conserved                                  | -0,1258 | 0,451  |
| TcCLB.508141.60  | hypothetical protein, conserved                                  | -0,1258 | 0,4802 |
| TcCLB.511577.19  | hypothetical protein, conserved                                  | -0,1258 | 0,6047 |
| TcCLB.506211.200 | metallo-peptidase, Clan MG, Family M24                           | -0,1259 | 0,1771 |
| TcCLB.509877.70  | hypothetical protein, conserved                                  | -0,1259 | 0,3611 |
| TcCLB.504041.20  | hypothetical protein, conserved                                  | -0,1259 | 0,4545 |
| TcCLB.509453.90  | hypothetical protein, conserved                                  | -0,1261 | 0,2698 |
| TcCLB.510421.260 | diacylglycerol acyltransferase, putative                         | -0,1262 | 0,4502 |
| TcCLB.506199.30  | hypothetical protein, conserved                                  | -0,1262 | 0,5189 |
| TcCLB.508815.179 | dynein heavy chain, putative (fragment)                          | -0,1263 | 0,298  |
| TcCLB.510989.20  | hypothetical protein, conserved                                  | -0,1263 | 0,3339 |
| TcCLB.508153.150 | hypothetical protein, conserved                                  | -0,1264 | 0,382  |
| TcCLB.509171.80  | hypothetical protein, conserved                                  | -0,1264 | 0,3986 |
| TcCLB.506767.74  | mucin TcMUCII (pseudogene), putative                             | -0,1264 | 0,8318 |
| TcCLB.510293.30  | Eukaryotic translation initiation factor 4E type 5, putative (   | -0,1265 | 0,2983 |
| TcCLB.504153.70  | hypothetical protein, conserved                                  | -0,1265 | 0,3079 |
| TcCLB.503779.80  | hypothetical protein, conserved (pseudogene)                     | -0,1265 | 0,3453 |
| TcCLB.506529.324 | hypothetical protein, conserved                                  | -0,1265 | 0,5447 |
| TcCLB.507007.34  | hypothetical protein, conserved                                  | -0,1266 | 0,3027 |
| TcCLB.503987.50  | hypothetical protein, conserved                                  | -0,1267 | 0,4171 |
| TcCLB.511587.90  | trans-sialidase, Group VIII, putative                            | -0,1268 | 0,4442 |
| TcCLB.509573.20  | hypothetical protein, conserved                                  | -0,1268 | 0,655  |
| TcCLB.506941.260 | hypothetical protein, conserved                                  | -0,127  | 0,3913 |
| TcCLB.506435.60  | hypothetical protein, conserved                                  | -0,127  | 0,4156 |
| TcCLB.511721.10  | hypothetical protein, conserved                                  | -0,1271 | 0,3793 |
| TcCLB.427789.30  | NAD synthase, putative                                           | -0,1271 | 0,49   |
| TcCLB.510655.10  | hypothetical protein, conserved                                  | -0,1271 | 0,5148 |
| TcCLB.511857.50  | actin-like protein, putative                                     | -0,1272 | 0,3615 |
| TcCLB.507089.154 | hypothetical protein, conserved                                  | -0,1273 | 0,166  |
| TcCLB.509827.20  | hypothetical protein, conserved                                  | -0,1273 | 0,5772 |
| TcCLB.506175.90  | hypothetical protein, conserved                                  | -0,1274 | 0,361  |
| TcCLB.469735.9   | hypothetical protein, conserved                                  | -0,1274 | 0,471  |
| TcCLB.503671.20  | hypothetical protein, conserved                                  | -0,1275 | 0,5122 |
| TcCLB.508479.450 | hypothetical protein, conserved (pseudogene)                     | -0,1275 | 0,5555 |
| TcCLB.398235.20  | ubiquitin fusion degradation protein, putative                   | -0,1275 | 0,7922 |
| TcCLB.511127.400 | serine/threonine protein phosphatase, putative                   | -0,1276 | 0,3293 |
| TcCLB.401469.20  | pumilio/PUF RNA binding protein 7, putative (PUF7)               | -0,1278 | 0,4826 |
| TcCLB.511861.60  | beta galactofuranosyl glycosyltransferase (pseudogene), putative | -0,1278 | 0,596  |

|                  |                                                               |         |        |
|------------------|---------------------------------------------------------------|---------|--------|
| TcCLB.511585.30  | hypothetical protein, conserved                               | -0,1279 | 0,2854 |
| TcCLB.511621.110 | hypothetical protein                                          | -0,1279 | 0,366  |
| TcCLB.508207.210 | hypothetical protein, conserved                               | -0,1279 | 0,5167 |
| TcCLB.511055.10  | retrotransposon hot spot protein (RHS, pseudogene), putative  | -0,128  | 0,2894 |
| TcCLB.511417.90  | phosphate-repressible phosphate permease, putative            | -0,128  | 0,564  |
| TcCLB.510431.80  | hypothetical protein, conserved                               | -0,1282 | 0,1966 |
| TcCLB.506925.470 | heat shock protein DNAJ, putative                             | -0,1282 | 0,2986 |
| TcCLB.511633.30  | hypothetical protein, conserved                               | -0,1282 | 0,4595 |
| TcCLB.510695.10  | surface protease GP63 (pseudogene), putative                  | -0,1282 | 0,6446 |
| TcCLB.506739.70  | hypothetical protein, conserved                               | -0,1283 | 0,3269 |
| TcCLB.509177.10  | hypothetical protein, conserved                               | -0,1283 | 0,4753 |
| TcCLB.508489.40  | hypothetical protein, conserved                               | -0,1285 | 0,4183 |
| TcCLB.507011.70  | hypothetical protein                                          | -0,1286 | 0,4384 |
| TcCLB.506601.40  | mucin-associated surface protein (MASP), putative             | -0,1286 | 0,818  |
| TcCLB.508179.10  | DnaJ chaperone protein, putative                              | -0,1288 | 0,5517 |
| TcCLB.505807.230 | hypothetical protein                                          | -0,1289 | 0,5963 |
| TcCLB.506831.60  | hypothetical protein, conserved                               | -0,129  | 0,3762 |
| TcCLB.508033.20  | hypothetical protein                                          | -0,129  | 0,8458 |
| TcCLB.468217.30  | trans-sialidase, putative                                     | -0,1291 | 0,661  |
| TcCLB.508221.970 | mucin-associated surface protein (MASP), putative             | -0,1291 | 0,735  |
| TcCLB.507809.14  | protein kinase, putative                                      | -0,1293 | 0,4034 |
| TcCLB.511001.170 | hypothetical protein, conserved                               | -0,1294 | 0,2101 |
| TcCLB.509563.30  | hypothetical protein, conserved                               | -0,1294 | 0,3199 |
| TcCLB.510355.220 | GDP-mannose transporter, putative                             | -0,1294 | 0,5814 |
| TcCLB.505123.10  | hypothetical protein, conserved                               | -0,1294 | 0,6346 |
| TcCLB.508465.140 | hypothetical protein, conserved                               | -0,1296 | 0,2187 |
| TcCLB.506525.140 | MEKK-related kinase 1, putative (MRK1)                        | -0,1296 | 0,303  |
| TcCLB.511367.320 | hypothetical protein, conserved                               | -0,1296 | 0,3506 |
| TcCLB.506619.40  | tyrosyl-DNA Phosphodiesterase (Tdp1), putative                | -0,1296 | 0,3762 |
| TcCLB.509005.30  | hypothetical protein, conserved                               | -0,1297 | 0,3754 |
| TcCLB.507089.220 | hypothetical protein, conserved                               | -0,1298 | 0,4169 |
| TcCLB.510239.60  | mucin TcMUCII, putative                                       | -0,1299 | 0,8397 |
| TcCLB.506195.250 | hypothetical protein, conserved                               | -0,1301 | 0,2577 |
| TcCLB.508347.70  | Engulfment and cell motility domain-containing protein (P)    | -0,1301 | 0,3812 |
| TcCLB.510917.9   | mucin-associated surface protein (MASP), putative             | -0,1301 | 0,7443 |
| TcCLB.503891.100 | 20S proteasome subunit                                        | -0,1302 | 0,3805 |
| TcCLB.511183.280 | mucin-associated surface protein (MASP), putative             | -0,1302 | 0,7616 |
| TcCLB.504007.20  | trans-sialidase, Group V, putative                            | -0,1302 | 0,7708 |
| TcCLB.510565.100 | hypothetical protein, conserved                               | -0,1303 | 0,4901 |
| TcCLB.508257.100 | hypothetical protein, conserved                               | -0,1303 | 0,5438 |
| TcCLB.509901.120 | hypothetical protein, conserved                               | -0,1304 | 0,4888 |
| TcCLB.509815.120 | dispersed gene family protein 1 (DGF-1, pseudogene), putative | -0,1304 | 0,5421 |
| TcCLB.510657.120 | hypothetical protein, conserved                               | -0,1304 | 0,6509 |
| TcCLB.507005.60  | structural maintenance of chromosome (SMC) family protein     | -0,1305 | 0,1537 |
| TcCLB.511741.40  | RNA-binding protein, putative                                 | -0,1305 | 0,3725 |

|                  |                                                                |         |        |
|------------------|----------------------------------------------------------------|---------|--------|
| TcCLB.511671.110 | hypothetical protein, conserved                                | -0,1305 | 0,5576 |
| TcCLB.509439.20  | UDP-Gal or UDP-GlcNAc-dependent glycosyltransferase, pu        | -0,1306 | 0,7831 |
| TcCLB.509525.90  | mucin TcMUCII, putative                                        | -0,1306 | 0,842  |
| TcCLB.510355.210 | hypothetical protein, conserved                                | -0,1307 | 0,2381 |
| TcCLB.506321.210 | mucin TcMUCII, putative                                        | -0,1307 | 0,8207 |
| TcCLB.508811.55  | hypothetical protein                                           | -0,1309 | 0,1517 |
| TcCLB.508737.200 | hypothetical protein, conserved                                | -0,1309 | 0,2294 |
| TcCLB.511907.110 | fatty acid transporter protein-like, putative                  | -0,1309 | 0,2403 |
| TcCLB.503893.170 | hypothetical protein, conserved                                | -0,1312 | 0,3116 |
| TcCLB.507821.10  | trans-sialidase, Group VI, putative                            | -0,1312 | 0,5617 |
| TcCLB.507941.70  | hypothetical protein, conserved                                | -0,1313 | 0,3077 |
| TcCLB.506743.120 | Elongator-like Protein 3a, putative                            | -0,1313 | 0,3723 |
| TcCLB.510047.109 | mucin TcMUCII, putative                                        | -0,1313 | 0,7339 |
| TcCLB.507047.180 | hypothetical protein, conserved                                | -0,1314 | 0,5733 |
| TcCLB.508451.5   | mucin-associated surface protein (MASP, pseudogene), pu        | -0,1314 | 0,5829 |
| TcCLB.510085.10  | mucin-associated surface protein (MASP, pseudogene), pu        | -0,1315 | 0,7754 |
| TcCLB.508739.80  | hypothetical protein, conserved                                | -0,1316 | 0,1785 |
| TcCLB.504257.20  | hypothetical protein, conserved                                | -0,1317 | 0,2831 |
| TcCLB.507087.20  | hypothetical protein                                           | -0,1317 | 0,3962 |
| TcCLB.510329.360 | hypothetical protein, conserved                                | -0,1317 | 0,4804 |
| TcCLB.508939.30  | mucin-associated surface protein (MASP), putative              | -0,1317 | 0,7894 |
| TcCLB.510517.80  | hypothetical protein, conserved                                | -0,1318 | 0,6101 |
| TcCLB.507583.4   | hypothetical protein, conserved (fragment)                     | -0,1319 | 0,6276 |
| TcCLB.509761.10  | hypothetical protein, conserved                                | -0,132  | 0,1112 |
| TcCLB.506701.29  | hypothetical protein, conserved                                | -0,132  | 0,4896 |
| TcCLB.427743.9   | translation initiation factor eIF2B delta subunit, putative (f | -0,1323 | 0,6023 |
| TcCLB.506893.90  | hypothetical protein, conserved                                | -0,1324 | 0,605  |
| TcCLB.511183.40  | mucin-associated surface protein (MASP, pseudogene), pu        | -0,1324 | 0,7952 |
| TcCLB.505999.130 | phosphatidylinositol-4-phosphate 5-kinase related              | -0,1325 | 0,4929 |
| TcCLB.431357.10  | 3,2-trans-enoyl-CoA isomerase, mitochondrial precursor, p      | -0,1325 | 0,5918 |
| TcCLB.506941.80  | tubulin-tyrosine ligase-like protein, putative                 | -0,1326 | 0,356  |
| TcCLB.509671.40  | hypothetical protein, conserved                                | -0,1327 | 0,4633 |
| TcCLB.510359.140 | hypothetical protein, conserved                                | -0,1327 | 0,6094 |
| TcCLB.510759.60  | vesicle-associated membrane protein, putative                  | -0,1328 | 0,4459 |
| TcCLB.503925.110 | hypothetical protein, conserved                                | -0,1328 | 0,5452 |
| TcCLB.508207.40  | hypothetical protein, conserved                                | -0,1328 | 0,5879 |
| TcCLB.504147.200 | Regulatory particle triple-A ATPase subunit 6 (RPT6)           | -0,1329 | 0,2801 |
| TcCLB.507601.90  | hypothetical protein, conserved                                | -0,1331 | 0,3092 |
| TcCLB.508741.330 | hypothetical protein, conserved                                | -0,1331 | 0,3157 |
| TcCLB.510435.20  | hypothetical protein, conserved                                | -0,1331 | 0,4365 |
| TcCLB.506943.110 | hypothetical protein                                           | -0,1331 | 0,5546 |
| TcCLB.508837.147 | kinesin, putative                                              | -0,1332 | 0,298  |
| TcCLB.503981.50  | hypothetical protein, conserved                                | -0,1332 | 0,4343 |
| TcCLB.506567.100 | hypothetical protein, conserved                                | -0,1334 | 0,3442 |
| TcCLB.510087.20  | hypothetical protein, conserved                                | -0,1334 | 0,4225 |

|                  |                                                           |         |         |
|------------------|-----------------------------------------------------------|---------|---------|
| TcCLB.511903.134 | hypothetical protein, conserved                           | -0,1334 | 0,5306  |
| TcCLB.506943.30  | hypothetical protein, conserved                           | -0,1335 | 0,2497  |
| TcCLB.506475.14  | phosphatidylinositol 3-kinase, putative                   | -0,1335 | 0,311   |
| TcCLB.506755.210 | hypothetical protein, conserved                           | -0,1335 | 0,4523  |
| TcCLB.506729.30  | hypothetical protein, conserved                           | -0,1336 | 0,5578  |
| TcCLB.511787.20  | trans-sialidase (pseudogene), putative                    | -0,1336 | 0,6933  |
| TcCLB.508461.149 | hypothetical protein, conserved                           | -0,1337 | 0,2706  |
| TcCLB.511301.180 | trans-sialidase (pseudogene), putative                    | -0,1337 | 0,392   |
| TcCLB.436137.9   | dispersed gene family protein 1 (DGF-1), putative (fragme | -0,1337 | 0,5064  |
| TcCLB.506391.20  | calmodulin, putative                                      | -0,1339 | 0,4274  |
| TcCLB.506247.70  | nuclear pore complex protein (NUP155), putative           | -0,134  | 0,09755 |
| TcCLB.504227.10  | hypothetical protein, conserved                           | -0,134  | 0,405   |
| TcCLB.510943.140 | DNA primase large subunit, putative (pril)                | -0,1341 | 0,285   |
| TcCLB.466965.10  | trans-sialidase (pseudogene), putative                    | -0,1343 | 0,5121  |
| TcCLB.510131.20  | hypothetical protein, conserved                           | -0,1343 | 0,5905  |
| TcCLB.507067.30  | mucin-associated surface protein (MASP, pseudogene), pu   | -0,1343 | 0,6399  |
| TcCLB.507283.10  | trans-sialidase, Group V, putative                        | -0,1344 | 0,3842  |
| TcCLB.507601.30  | hypothetical protein, conserved                           | -0,1344 | 0,5326  |
| TcCLB.509695.90  | intraflagellar transport protein 172, putative (IFT172)   | -0,1345 | 0,2342  |
| TcCLB.510099.100 | hypothetical protein, conserved                           | -0,1345 | 0,24    |
| TcCLB.506865.10  | ARP2/3 complex subunit, putative                          | -0,1345 | 0,4502  |
| TcCLB.506041.60  | hypothetical protein, conserved                           | -0,1346 | 0,2491  |
| TcCLB.511655.69  | ubiquitin-activating enzyme-like protein                  | -0,1346 | 0,4033  |
| TcCLB.477471.10  | trans-sialidase (pseudogene), putative                    | -0,1346 | 0,4995  |
| TcCLB.506929.60  | ATP-dependent DEAD/H RNA helicase (pseudogene), putat     | -0,1346 | 0,5219  |
| TcCLB.507003.70  | hypothetical protein, conserved                           | -0,1346 | 0,5364  |
| TcCLB.507105.70  | ABC transporter, putative                                 | -0,1347 | 0,2888  |
| TcCLB.503809.149 | TATA binding protein (TBP)                                | -0,1348 | 0,3802  |
| TcCLB.422921.20  | 50S ribosomal protein L17, putative                       | -0,1349 | 0,6156  |
| TcCLB.506759.70  | mucin TcMUCII, putative                                   | -0,1349 | 0,8849  |
| TcCLB.510143.80  | RNA-binding protein, putative                             | -0,1351 | 0,2557  |
| TcCLB.504159.100 | hypothetical protein, conserved                           | -0,1351 | 0,5188  |
| TcCLB.506181.110 | hypothetical protein, conserved                           | -0,1351 | 0,632   |
| TcCLB.506925.140 | DNA repair protein, putative                              | -0,1352 | 0,2071  |
| TcCLB.508445.99  | pumilio/PUF RNA binding protein 7, putative (PUF7)        | -0,1353 | 0,3715  |
| TcCLB.508741.180 | hypothetical protein, conserved                           | -0,1353 | 0,4182  |
| TcCLB.508175.200 | hypothetical protein, conserved                           | -0,1353 | 0,4323  |
| TcCLB.510279.310 | mucin-associated surface protein (MASP), putative         | -0,1354 | 0,7186  |
| TcCLB.511491.20  | hypothetical protein, conserved                           | -0,1356 | 0,1276  |
| TcCLB.510091.130 | hypothetical protein, conserved                           | -0,1356 | 0,2594  |
| TcCLB.503611.10  | nucleoplasmin-like protein (NLP), putative                | -0,1357 | 0,3076  |
| TcCLB.508219.170 | trans-sialidase (pseudogene), putative                    | -0,1357 | 0,7536  |
| TcCLB.509429.50  | retrotransposon hot spot protein (RHS, pseudogene), putat | -0,1358 | 0,2425  |
| TcCLB.510025.230 | hypothetical protein                                      | -0,1358 | 0,8575  |
| TcCLB.503893.40  | hypothetical protein, conserved                           | -0,1359 | 0,4263  |

|                  |                                                        |         |        |
|------------------|--------------------------------------------------------|---------|--------|
| TcCLB.509671.172 | hypothetical protein, conserved                        | -0,1359 | 0,5089 |
| TcCLB.507953.190 | hypothetical protein                                   | -0,1359 | 0,8366 |
| TcCLB.511807.260 | hypothetical protein, conserved                        | -0,1361 | 0,1221 |
| TcCLB.507875.30  | hypothetical protein, conserved                        | -0,1361 | 0,4273 |
| TcCLB.510307.210 | trans-sialidase, Group II, putative                    | -0,1362 | 0,6522 |
| TcCLB.506133.190 | trans-sialidase, Group VI, putative                    | -0,1363 | 0,7902 |
| TcCLB.506627.40  | hypothetical protein, conserved                        | -0,1364 | 0,4205 |
| TcCLB.503763.50  | trans-sialidase (pseudogene), putative                 | -0,1364 | 0,4243 |
| TcCLB.511249.10  | ADP/ATP mitochondrial carrier protein, putative        | -0,1365 | 0,2605 |
| TcCLB.511317.70  | RNA-binding protein, putative (RBP30)                  | -0,1366 | 0,3308 |
| TcCLB.506789.50  | mucin-associated surface protein (MASP), putative      | -0,1366 | 0,7629 |
| TcCLB.506425.160 | hypothetical protein, conserved                        | -0,1367 | 0,42   |
| TcCLB.508153.910 | hypothetical protein, conserved                        | -0,1367 | 0,451  |
| TcCLB.508153.80  | DNA replication complex GINS protein SLD5, putative    | -0,1369 | 0,4738 |
| TcCLB.509267.70  | hypothetical protein                                   | -0,137  | 0,2201 |
| TcCLB.506577.140 | hypothetical protein, conserved                        | -0,137  | 0,5605 |
| TcCLB.506679.220 | nucleoplasmin-like protein (NLP), putative             | -0,1371 | 0,1711 |
| TcCLB.510889.205 | hypothetical protein, conserved                        | -0,1371 | 0,3935 |
| TcCLB.506355.20  | receptor-type adenylate cyclase, putative              | -0,1371 | 0,4502 |
| TcCLB.511923.60  | trans-sialidase, Group V, putative                     | -0,1371 | 0,598  |
| TcCLB.506813.29  | mucin-associated surface protein (MASP), putative      | -0,1371 | 0,8214 |
| TcCLB.506649.40  | rho-like GTP binding protein, putative                 | -0,1372 | 0,4238 |
| TcCLB.506503.170 | hypothetical protein, conserved                        | -0,1372 | 0,6222 |
| TcCLB.507491.70  | hypothetical protein, conserved (pseudogene)           | -0,1375 | 0,2346 |
| TcCLB.508199.70  | hypothetical protein                                   | -0,1376 | 0,3267 |
| TcCLB.506297.280 | hypothetical protein, conserved                        | -0,1376 | 0,3739 |
| TcCLB.511577.130 | poly(A) export protein, putative                       | -0,1376 | 0,3858 |
| TcCLB.508461.390 | hypothetical protein, conserved                        | -0,1377 | 0,2149 |
| TcCLB.506929.10  | surface protease GP63, putative                        | -0,1378 | 0,3516 |
| TcCLB.509779.50  | hypothetical protein, conserved                        | -0,1378 | 0,3954 |
| TcCLB.507057.50  | hypothetical protein, conserved                        | -0,1379 | 0,3853 |
| TcCLB.472777.9   | hypothetical protein, conserved                        | -0,1379 | 0,71   |
| TcCLB.508813.50  | oxidoreductase-like protein, putative                  | -0,138  | 0,2292 |
| TcCLB.507467.94  | hypothetical protein, conserved                        | -0,138  | 0,5787 |
| TcCLB.510025.191 | surface protease GP63 (pseudogene), putative           | -0,138  | 0,8312 |
| TcCLB.507927.20  | mitochondrial oligo_U binding protein TBRGG1, putative | -0,1381 | 0,3417 |
| TcCLB.507483.60  | translation-associated element 2, putative             | -0,1382 | 0,2396 |
| TcCLB.511725.130 | hypothetical protein, conserved                        | -0,1383 | 0,1076 |
| TcCLB.507991.110 | hypothetical protein, conserved                        | -0,1384 | 0,2915 |
| TcCLB.511603.250 | mucin-associated surface protein (MASP), putative      | -0,1385 | 0,7237 |
| TcCLB.503823.60  | hypothetical protein, conserved                        | -0,1386 | 0,3433 |
| TcCLB.504251.20  | hypothetical protein, conserved                        | -0,1386 | 0,4995 |
| TcCLB.503801.79  | hypothetical protein, conserved                        | -0,1387 | 0,5081 |
| TcCLB.506269.25  | hypothetical protein                                   | -0,1387 | 0,7379 |
| TcCLB.506515.29  | trans-sialidase, putative                              | -0,1388 | 0,6872 |



|                  |                                                            |         |         |
|------------------|------------------------------------------------------------|---------|---------|
| TcCLB.508277.360 | ubiquitin hydrolase, putative                              | -0,1389 | 0,1614  |
| TcCLB.508675.40  | hypothetical protein, conserved                            | -0,1389 | 0,3025  |
| TcCLB.509735.84  | dispersed gene family protein 1 (DGF-1), putative          | -0,1389 | 0,3945  |
| TcCLB.508307.60  | hypothetical protein, conserved                            | -0,139  | 0,2371  |
| TcCLB.508461.400 | nucleoside diphosphate kinase (NDPK2)                      | -0,139  | 0,3015  |
| TcCLB.506209.50  | trans-sialidase (pseudogene), putative                     | -0,1392 | 0,6266  |
| TcCLB.504149.80  | hypothetical protein, conserved                            | -0,1393 | 0,2427  |
| TcCLB.510945.10  | ubiquitin carboxyl-terminal hydrolase, putative            | -0,1393 | 0,3719  |
| TcCLB.511711.60  | hypothetical protein                                       | -0,1393 | 0,5917  |
| TcCLB.447847.19  | retrotransposon hot spot protein (RHS, pseudogene), putat  | -0,1395 | 0,5558  |
| TcCLB.507063.110 | hypothetical protein, conserved                            | -0,1396 | 0,1697  |
| TcCLB.507005.30  | hypothetical protein, conserved                            | -0,1398 | 0,3027  |
| TcCLB.503779.100 | hypothetical protein, conserved                            | -0,1398 | 0,3727  |
| TcCLB.506289.110 | surface protease GP63 (pseudogene), putative               | -0,1398 | 0,5429  |
| TcCLB.506203.70  | pre-mRNA-splicing factor ATP-dependent RNA helicase, pu    | -0,1399 | 0,1989  |
| TcCLB.508927.30  | hypothetical protein, conserved                            | -0,1399 | 0,4042  |
| TcCLB.467287.30  | ATPase beta subunit, putative                              | -0,1401 | 0,19    |
| TcCLB.503473.4   | proteasome 26S non-ATPase subunit 9, putative              | -0,1401 | 0,6447  |
| TcCLB.508873.590 | retrotransposon hot spot protein (RHS, pseudogene), putat  | -0,1403 | 0,6247  |
| TcCLB.508909.20  | guanosine monophosphate reductase, putative                | -0,1404 | 0,1202  |
| TcCLB.511837.138 | RNA-binding protein, putative                              | -0,1404 | 0,2424  |
| TcCLB.506467.4   | hypothetical protein, conserved                            | -0,1404 | 0,4734  |
| TcCLB.506629.40  | hypothetical protein, conserved                            | -0,1405 | 0,1275  |
| TcCLB.511545.180 | hypothetical protein, conserved                            | -0,1405 | 0,2     |
| TcCLB.507611.70  | trans-sialidase (pseudogene), putative                     | -0,1405 | 0,6032  |
| TcCLB.507681.259 | Flagellar Member 1 (fragment) (FLAM1)                      | -0,1406 | 0,3678  |
| TcCLB.511875.25  | elongation factor 1-gamma (EF-1-gamma, pseudogene), p      | -0,1407 | 0,7842  |
| TcCLB.511051.50  | 40S ribosomal protein S4, putative                         | -0,1408 | 0,07153 |
| TcCLB.482471.10  | hypothetical protein, conserved                            | -0,1408 | 0,3713  |
| TcCLB.506883.90  | hypothetical protein, conserved                            | -0,1408 | 0,3821  |
| TcCLB.507811.20  | delta-adaptin, putative                                    | -0,141  | 0,2533  |
| TcCLB.510963.20  | hypothetical protein, conserved                            | -0,141  | 0,303   |
| TcCLB.506577.170 | hypothetical protein, conserved                            | -0,141  | 0,3545  |
| TcCLB.506267.75  | hypothetical protein, conserved (pseudogene)               | -0,141  | 0,6764  |
| TcCLB.408825.5   | mucin-associated surface protein (MASP), putative (fragm   | -0,141  | 0,816   |
| TcCLB.511727.210 | Repressor of differentiation kinase 1, putative (RDK1.1)   | -0,1411 | 0,154   |
| TcCLB.504243.30  | hypothetical protein, conserved                            | -0,1411 | 0,1549  |
| TcCLB.509205.10  | guanine-nucleotide-exchange-factor, putative               | -0,1412 | 0,454   |
| TcCLB.503457.4   | hypothetical protein, conserved                            | -0,1412 | 0,6351  |
| TcCLB.510963.80  | hypothetical protein, conserved                            | -0,1414 | 0,5842  |
| TcCLB.508541.90  | mucin-associated surface protein (MASP), putative          | -0,1414 | 0,7029  |
| TcCLB.510243.30  | chaperone DNAJ protein, putative                           | -0,1415 | 0,243   |
| TcCLB.506893.60  | hypothetical protein, conserved                            | -0,1415 | 0,5457  |
| TcCLB.503919.10  | spliced leader RNA PSE-promoter transcription factor, puta | -0,1416 | 0,3069  |
| TcCLB.506007.40  | protein kinase, putative                                   | -0,1417 | 0,2816  |

|                  |                                                                     |         |         |
|------------------|---------------------------------------------------------------------|---------|---------|
| TcCLB.504045.70  | hypothetical protein, conserved                                     | -0,1417 | 0,5048  |
| TcCLB.506417.70  | hypothetical protein                                                | -0,1418 | 0,4593  |
| TcCLB.509579.30  | retrotransposon hot spot protein (RHS, pseudogene), putat           | -0,1419 | 0,4286  |
| TcCLB.413605.10  | kinesin, putative                                                   | -0,1421 | 0,2697  |
| TcCLB.508213.20  | hypothetical protein, conserved                                     | -0,1421 | 0,5576  |
| TcCLB.506943.23  | hypothetical protein, conserved                                     | -0,1422 | 0,4524  |
| TcCLB.458369.10  | trans-sialidase (pseudogene), putative                              | -0,1425 | 0,7639  |
| TcCLB.510323.10  | protein kinase, putative                                            | -0,1426 | 0,3761  |
| TcCLB.506203.90  | hypothetical protein, conserved                                     | -0,1428 | 0,25    |
| TcCLB.506467.10  | hypothetical protein, conserved                                     | -0,1428 | 0,3634  |
| TcCLB.510075.60  | hypothetical protein                                                | -0,1429 | 0,5574  |
| TcCLB.505163.10  | hypothetical protein, conserved                                     | -0,143  | 0,6251  |
| TcCLB.511075.30  | TFIIH basal transcription factor complex helicase subunit, $\gamma$ | -0,1431 | 0,1058  |
| TcCLB.506627.90  | hypothetical protein                                                | -0,1431 | 0,1494  |
| TcCLB.508647.100 | hypothetical protein, conserved                                     | -0,1431 | 0,2229  |
| TcCLB.507237.220 | mucin-associated surface protein (MASP), putative                   | -0,1431 | 0,8344  |
| TcCLB.507897.40  | acetyl-CoA carboxylase, putative                                    | -0,1432 | 0,2799  |
| TcCLB.503855.60  | hypothetical protein, conserved                                     | -0,1432 | 0,3572  |
| TcCLB.509611.50  | hypothetical protein, conserved                                     | -0,1432 | 0,423   |
| TcCLB.399173.10  | trans-sialidase, putative (fragment)                                | -0,1432 | 0,7195  |
| TcCLB.509937.190 | hypothetical protein, conserved                                     | -0,1433 | 0,2692  |
| TcCLB.507031.60  | nuclear cap binding complex subunit CBP30, putative (CBP3)          | -0,1433 | 0,4027  |
| TcCLB.507887.10  | dihydroorotase (pseudogene), putative                               | -0,1433 | 0,6412  |
| TcCLB.511769.20  | dispersed gene family protein 1 (DGF-1), putative                   | -0,1434 | 0,4892  |
| TcCLB.510143.129 | hypothetical protein, conserved                                     | -0,1434 | 0,5268  |
| TcCLB.508647.120 | hypothetical protein, conserved                                     | -0,1435 | 0,1902  |
| TcCLB.503643.10  | KU70 protein, putative                                              | -0,1435 | 0,303   |
| TcCLB.504101.50  | trans-sialidase, Group V, putative                                  | -0,1435 | 0,4717  |
| TcCLB.508679.20  | ribonuclease inhibitor, putative                                    | -0,1435 | 0,4765  |
| TcCLB.506127.130 | hypothetical protein, conserved                                     | -0,1436 | 0,3187  |
| TcCLB.506895.50  | hypothetical protein, conserved                                     | -0,1436 | 0,3541  |
| TcCLB.504205.10  | hypothetical protein                                                | -0,1437 | 0,5567  |
| TcCLB.505941.10  | surface protease GP63, putative                                     | -0,1438 | 0,4644  |
| TcCLB.503953.20  | hypothetical protein, conserved                                     | -0,1438 | 0,5368  |
| TcCLB.506297.30  | hypothetical protein, conserved                                     | -0,1439 | 0,08537 |
| TcCLB.509721.79  | hypothetical protein, conserved (fragment)                          | -0,1439 | 0,2496  |
| TcCLB.510377.450 | mucin-associated surface protein (MASP), putative                   | -0,1439 | 0,7243  |
| TcCLB.510197.130 | trans-sialidase, Group VI, putative                                 | -0,144  | 0,7816  |
| TcCLB.506989.80  | hypothetical protein, conserved                                     | -0,1441 | 0,4901  |
| TcCLB.508409.320 | hypothetical protein, conserved                                     | -0,1442 | 0,1734  |
| TcCLB.506303.120 | hypothetical protein, conserved                                     | -0,1442 | 0,2428  |
| TcCLB.509641.70  | hypothetical protein, conserved                                     | -0,1443 | 0,1301  |
| TcCLB.506131.114 | mucin TcMUC (pseudogene), putative                                  | -0,1443 | 0,7824  |
| TcCLB.509753.220 | mucin TcMUCII, putative                                             | -0,1444 | 0,7986  |
| TcCLB.507501.5   | trans-sialidase, putative (fragment)                                | -0,1444 | 0,8377  |

|                  |                                                                        |         |         |
|------------------|------------------------------------------------------------------------|---------|---------|
| TcCLB.503897.110 | plectin-like protein, putative                                         | -0,1445 | 0,3497  |
| TcCLB.504625.90  | hypothetical protein, conserved                                        | -0,1445 | 0,4217  |
| TcCLB.508699.100 | surface protease GP63, putative                                        | -0,1446 | 0,5119  |
| TcCLB.509223.80  | trans-sialidase (pseudogene), putative                                 | -0,1446 | 0,5136  |
| TcCLB.511213.81  | retrotransposon hot spot protein (RHS, pseudogene), putative           | -0,1446 | 0,578   |
| TcCLB.506221.110 | chromosomal passenger protein, putative (CPC2)                         | -0,1447 | 0,3425  |
| TcCLB.511237.40  | CDP-DAG synthase, putative (CDS)                                       | -0,1448 | 0,301   |
| TcCLB.511855.30  | hypothetical protein, conserved                                        | -0,1448 | 0,6247  |
| TcCLB.506939.50  | mucin-associated surface protein (MASP), putative                      | -0,1448 | 0,8595  |
| TcCLB.503847.60  | hypothetical protein, conserved                                        | -0,1449 | 0,2114  |
| TcCLB.511071.150 | hypothetical protein, conserved                                        | -0,1449 | 0,406   |
| TcCLB.509693.194 | hypothetical protein, conserved                                        | -0,1449 | 0,6958  |
| TcCLB.510507.60  | inositol 1,4,5-trisphosphate receptor, putative (fragment) (           | -0,145  | 0,1671  |
| TcCLB.511071.120 | hypothetical protein, conserved                                        | -0,145  | 0,2115  |
| TcCLB.511517.70  | RNA-binding protein, putative                                          | -0,1453 | 0,2719  |
| TcCLB.511171.25  | hypothetical protein, conserved (pseudogene)                           | -0,1453 | 0,5609  |
| TcCLB.506971.10  | mucin-associated surface protein (MASP), putative                      | -0,1453 | 0,7711  |
| TcCLB.507875.200 | trans-sialidase (pseudogene), putative                                 | -0,1454 | 0,5457  |
| TcCLB.507099.110 | hypothetical protein, conserved                                        | -0,1455 | 0,2746  |
| TcCLB.506959.130 | 60S ribosomal protein L30, putative                                    | -0,1456 | 0,07432 |
| TcCLB.511637.9   | zinc carboxypeptidase, putative                                        | -0,1456 | 0,1991  |
| TcCLB.509537.30  | hypothetical protein, conserved                                        | -0,1456 | 0,3514  |
| TcCLB.508479.390 | RNA triphosphatase, putative                                           | -0,1457 | 0,4218  |
| TcCLB.508707.60  | hypothetical protein, conserved                                        | -0,1458 | 0,1528  |
| TcCLB.507083.20  | dispersed gene family protein 1 (DGF-1), putative                      | -0,1458 | 0,286   |
| TcCLB.509767.130 | hypothetical protein, conserved                                        | -0,1458 | 0,601   |
| TcCLB.503667.20  | hypothetical protein                                                   | -0,1458 | 0,7636  |
| TcCLB.511597.50  | trans-sialidase, putative (fragment)                                   | -0,1458 | 0,8604  |
| TcCLB.432677.10  | heat shock 70 kDa protein, mitochondrial precursor (pseudogene)        | -0,1459 | 0,1758  |
| TcCLB.504215.20  | dolichyl-P-Man:GDP-ManGlcNAc2-PP-dolichyl beta-1,4-mannosyltransferase | -0,1459 | 0,3512  |
| TcCLB.409117.20  | 40S ribosomal protein S14, putative                                    | -0,146  | 0,1177  |
| TcCLB.509911.40  | hypothetical protein, conserved                                        | -0,146  | 0,4899  |
| TcCLB.511803.80  | hypothetical protein, conserved (fragment)                             | -0,1461 | 0,7692  |
| TcCLB.508347.159 | microtubule-associated protein, putative, (fragment) (GB4)             | -0,1462 | 0,3702  |
| TcCLB.510289.50  | hypothetical protein, conserved                                        | -0,1463 | 0,3374  |
| TcCLB.509067.14  | hypothetical protein, conserved                                        | -0,1464 | 0,5339  |
| TcCLB.508145.49  | hypothetical protein, conserved                                        | -0,1466 | 0,1828  |
| TcCLB.510357.70  | ubiquinone biosynthesis protein-like protein, putative                 | -0,1466 | 0,366   |
| TcCLB.511281.56  | sjogren s syndrome nuclear autoantigen 1, putative                     | -0,1466 | 0,4684  |
| TcCLB.511725.10  | proteasome regulatory non-ATPase subunit, putative                     | -0,1467 | 0,3291  |
| TcCLB.506925.550 | calpain-like cysteine peptidase (pseudogene), putative                 | -0,1467 | 0,5044  |
| TcCLB.508415.50  | ADP-ribosylation factor 1, putative (ARF1)                             | -0,1468 | 0,2484  |
| TcCLB.510357.120 | hypothetical protein, conserved                                        | -0,1468 | 0,7046  |
| TcCLB.508257.260 | AP-1 adapter complex gamma subunit, putative                           | -0,1469 | 0,1336  |
| TcCLB.508779.90  | structural maintenance of chromosome protein 4, putative               | -0,1469 | 0,1761  |

|                  |                                                                              |         |        |
|------------------|------------------------------------------------------------------------------|---------|--------|
| TcCLB.508321.30  | hypothetical protein, conserved                                              | -0,1469 | 0,5815 |
| TcCLB.509171.100 | hypothetical protein, conserved                                              | -0,1472 | 0,2717 |
| TcCLB.506435.10  | hypothetical protein, conserved                                              | -0,1472 | 0,4987 |
| TcCLB.507677.30  | hypothetical protein, conserved                                              | -0,1474 | 0,267  |
| TcCLB.511367.74  | hypothetical protein, conserved                                              | -0,1474 | 0,4229 |
| TcCLB.506265.30  | mitochondrial DNA polymerase I protein A, putative                           | -0,1475 | 0,2167 |
| TcCLB.504085.30  | RNA-binding protein, putative                                                | -0,1476 | 0,3179 |
| TcCLB.507703.10  | retrotransposon hot spot protein (RHS, pseudogene), putative                 | -0,1476 | 0,5216 |
| TcCLB.506925.260 | protein kinase, putative                                                     | -0,1477 | 0,3678 |
| TcCLB.504079.3   | mitochondrial chaperone BCS1, putative (fragment)                            | -0,1479 | 0,3464 |
| TcCLB.507951.30  | receptor-type adenylate cyclase (pseudogene), putative                       | -0,1481 | 0,2292 |
| TcCLB.506367.140 | hypothetical protein, conserved                                              | -0,1482 | 0,2446 |
| TcCLB.505071.40  | hypothetical protein                                                         | -0,1482 | 0,3841 |
| TcCLB.509777.60  | ADG2, putative                                                               | -0,1483 | 0,3337 |
| TcCLB.508415.59  | hypothetical protein, conserved                                              | -0,1483 | 0,6192 |
| TcCLB.506101.10  | mucin-associated surface protein (MASP), putative                            | -0,1483 | 0,6481 |
| TcCLB.508387.150 | hypothetical protein                                                         | -0,1485 | 0,3143 |
| TcCLB.508153.400 | serine/threonine-protein kinase, putative                                    | -0,1486 | 0,1424 |
| TcCLB.510173.120 | hypothetical protein, conserved                                              | -0,1486 | 0,4827 |
| TcCLB.511599.10  | trans-sialidase, putative                                                    | -0,1486 | 0,8362 |
| TcCLB.503861.80  | dispersed gene family protein 1 (DGF-1), putative                            | -0,1487 | 0,3127 |
| TcCLB.509007.80  | hypothetical protein, conserved                                              | -0,1487 | 0,3393 |
| TcCLB.511611.11  | hypothetical protein                                                         | -0,1487 | 0,6693 |
| TcCLB.462617.10  | dynein heavy chain (pseudogene), putative                                    | -0,1488 | 0,1798 |
| TcCLB.509965.180 | RNA-binding protein, putative                                                | -0,1488 | 0,1947 |
| TcCLB.510163.60  | trans-sialidase, Group V, putative                                           | -0,1488 | 0,2768 |
| TcCLB.509797.20  | hypothetical protein, conserved                                              | -0,1488 | 0,3395 |
| TcCLB.509743.19  | dispersed gene family protein 1 (DGF-1), putative (fragment)                 | -0,149  | 0,5525 |
| TcCLB.506513.160 | protein kinase, putative                                                     | -0,1491 | 0,2254 |
| TcCLB.510747.26  | hypothetical protein, conserved                                              | -0,1491 | 0,6023 |
| TcCLB.510291.7   | TPR-repeat-containing chaperone protein DNAJ, putative (fragment)            | -0,1492 | 0,359  |
| TcCLB.506911.10  | mucin TcMUCII, putative                                                      | -0,1492 | 0,8186 |
| TcCLB.511585.160 | hypothetical protein, conserved                                              | -0,1493 | 0,2761 |
| TcCLB.507623.50  | oxidoreductase, putative                                                     | -0,1493 | 0,3787 |
| TcCLB.511735.34  | hypothetical protein, conserved                                              | -0,1493 | 0,4819 |
| TcCLB.503643.20  | cyclic nucleotide-binding domain containing protein, putative                | -0,1494 | 0,1874 |
| TcCLB.511127.280 | hypothetical protein, conserved                                              | -0,1494 | 0,4298 |
| TcCLB.503879.60  | hypothetical protein, conserved                                              | -0,1495 | 0,3302 |
| TcCLB.510329.310 | hypothetical protein, conserved                                              | -0,1496 | 0,3139 |
| TcCLB.511481.40  | N-Acetyl-D-glucosaminylphosphatidylinositol de-N-acetyltransferase, putative | -0,1496 | 0,4365 |
| TcCLB.506727.40  | hypothetical protein, conserved                                              | -0,1496 | 0,5224 |
| TcCLB.504827.40  | AP-3 complex subunit beta, putative (AP3B)                                   | -0,15   | 0,2239 |
| TcCLB.506821.180 | aquaporin-like protein, putative                                             | -0,1501 | 0,411  |
| TcCLB.507927.80  | hypothetical protein                                                         | -0,1503 | 0,3649 |
| TcCLB.507867.90  | hypothetical protein, conserved                                              | -0,1503 | 0,378  |

|                  |                                                             |         |        |
|------------------|-------------------------------------------------------------|---------|--------|
| TcCLB.510283.114 | DNA-directed RNA polymerase I subunit, putative             | -0,1503 | 0,4226 |
| TcCLB.506625.150 | hypothetical protein, conserved                             | -0,1503 | 0,4335 |
| TcCLB.509769.10  | hypothetical protein, conserved                             | -0,1503 | 0,5838 |
| TcCLB.508703.25  | hypothetical protein                                        | -0,1504 | 0,2915 |
| TcCLB.510351.40  | ATP-dependent RNA helicase, putative                        | -0,1507 | 0,1949 |
| TcCLB.421959.10  | eukaryotic translation initiation factor 4E, putative       | -0,1507 | 0,2764 |
| TcCLB.511889.40  | dispersed gene family protein 1 (DGF-1), putative           | -0,1507 | 0,4461 |
| TcCLB.511001.180 | hypothetical protein, conserved                             | -0,1508 | 0,2261 |
| TcCLB.506679.170 | hypothetical protein, conserved                             | -0,151  | 0,1185 |
| TcCLB.507031.179 | hypothetical protein, conserved                             | -0,151  | 0,356  |
| TcCLB.506195.180 | hypothetical protein, conserved                             | -0,151  | 0,4227 |
| TcCLB.511291.80  | hypothetical protein, conserved                             | -0,151  | 0,5552 |
| TcCLB.510307.19  | mucin-associated surface protein (MASP, pseudogene), pu     | -0,1511 | 0,6212 |
| TcCLB.506631.50  | hypothetical protein, conserved (fragment)                  | -0,1511 | 0,7976 |
| TcCLB.509073.20  | hypothetical protein, conserved                             | -0,1512 | 0,1233 |
| TcCLB.510889.310 | hypothetical protein, conserved                             | -0,1512 | 0,1928 |
| TcCLB.509715.26  | hypothetical protein, conserved                             | -0,1512 | 0,3835 |
| TcCLB.509985.60  | hypothetical protein, conserved                             | -0,1513 | 0,1561 |
| TcCLB.507711.30  | hypothetical protein, conserved                             | -0,1513 | 0,3838 |
| TcCLB.425969.9   | cyclin-dependent kinases regulatory subunit, putative (P12) | -0,1514 | 0,4847 |
| TcCLB.510663.50  | hypothetical protein, conserved                             | -0,1515 | 0,2059 |
| TcCLB.508175.300 | hypothetical protein, conserved                             | -0,1515 | 0,3338 |
| TcCLB.510963.70  | ARP2/3 complex subunit, putative                            | -0,1517 | 0,4377 |
| TcCLB.511525.29  | hypothetical protein, conserved                             | -0,1518 | 0,2119 |
| TcCLB.508165.50  | mucin-associated surface protein (MASP), putative           | -0,1519 | 0,8259 |
| TcCLB.510187.390 | Protein kinase domain, putative                             | -0,152  | 0,1695 |
| TcCLB.506793.90  | hypothetical protein, conserved                             | -0,152  | 0,3099 |
| TcCLB.511407.20  | hypothetical protein, conserved                             | -0,152  | 0,3546 |
| TcCLB.511431.30  | conserved protein, unknown function                         | -0,1521 | 0,2917 |
| TcCLB.506795.29  | hypothetical protein, conserved                             | -0,1521 | 0,3192 |
| TcCLB.510363.19  | trans-sialidase (pseudogene), putative                      | -0,1523 | 0,6663 |
| TcCLB.468405.9   | dispersed gene family protein 1 (DGF-1), putative           | -0,1523 | 0,7764 |
| TcCLB.506221.60  | hypothetical protein, conserved (pseudogene)                | -0,1524 | 0,1912 |
| TcCLB.509163.30  | trans-sialidase (pseudogene), putative                      | -0,1524 | 0,6062 |
| TcCLB.508141.50  | hypothetical protein, conserved                             | -0,1525 | 0,4647 |
| TcCLB.507895.60  | UDP-Gal or UDP-GlcNAc-dependent glycosyltransferase, pu     | -0,1525 | 0,7019 |
| TcCLB.504089.60  | hypothetical protein, conserved                             | -0,1526 | 0,1946 |
| TcCLB.504257.30  | S-adenosylmethionine decarboxylase proenzyme, putative      | -0,1526 | 0,2196 |
| TcCLB.510657.160 | Double RNA binding domain protein 9 (DRBD9)                 | -0,1526 | 0,3398 |
| TcCLB.505983.30  | hypothetical protein, conserved                             | -0,1528 | 0,1218 |
| TcCLB.510817.40  | hypothetical protein, conserved                             | -0,1528 | 0,6496 |
| TcCLB.509545.50  | mucin-associated surface protein (MASP), putative           | -0,1529 | 0,7099 |
| TcCLB.504625.30  | hypothetical protein                                        | -0,153  | 0,1835 |
| TcCLB.506543.100 | hypothetical protein, conserved                             | -0,153  | 0,3534 |
| TcCLB.511595.10  | trans-sialidase (pseudogene), putative                      | -0,153  | 0,7449 |

|                  |                                                               |         |         |
|------------------|---------------------------------------------------------------|---------|---------|
| TcCLB.508831.20  | oligomeric golgi complex component 8, putative                | -0,1531 | 0,2831  |
| TcCLB.509399.70  | hypothetical protein, conserved                               | -0,1532 | 0,3059  |
| TcCLB.508189.20  | dispersed gene family protein 1 (DGF-1, pseudogene), putative | -0,1532 | 0,6151  |
| TcCLB.511903.260 | hypothetical protein, conserved                               | -0,1533 | 0,316   |
| TcCLB.507083.90  | hypothetical protein, conserved                               | -0,1533 | 0,405   |
| TcCLB.510017.50  | surface protease GP63 (pseudogene), putative                  | -0,1535 | 0,7888  |
| TcCLB.504163.90  | hypothetical protein, conserved                               | -0,1537 | 0,2756  |
| TcCLB.507041.80  | hypothetical protein                                          | -0,1537 | 0,5565  |
| TcCLB.510519.110 | hypothetical protein                                          | -0,1538 | 0,4936  |
| TcCLB.506931.30  | hypothetical protein, conserved                               | -0,1539 | 0,537   |
| TcCLB.420369.20  | trans-sialidase (pseudogene), putative                        | -0,1539 | 0,5766  |
| TcCLB.504163.50  | fructose-bisphosphate aldolase, glycosomal, putative          | -0,154  | 0,3208  |
| TcCLB.507787.170 | retrotransposon hot spot protein (RHS, pseudogene), putative  | -0,1541 | 0,1685  |
| TcCLB.511517.110 | hypothetical protein, conserved                               | -0,1541 | 0,2385  |
| TcCLB.509999.90  | carnitine/choline acetyltransferase, putative                 | -0,1543 | 0,09248 |
| TcCLB.507831.50  | hypothetical protein, conserved                               | -0,1545 | 0,1162  |
| TcCLB.508817.150 | hypothetical protein, conserved                               | -0,1546 | 0,239   |
| TcCLB.508397.64  | hypothetical protein, conserved                               | -0,1546 | 0,5034  |
| TcCLB.508355.80  | trans-sialidase, Group VIII, putative                         | -0,1546 | 0,5892  |
| TcCLB.506885.370 | hypothetical protein, conserved                               | -0,1547 | 0,4505  |
| TcCLB.510207.35  | mucin TcMUCII (pseudogene), putative                          | -0,1547 | 0,7015  |
| TcCLB.507099.10  | hypothetical protein, conserved                               | -0,1548 | 0,1281  |
| TcCLB.511189.10  | hypothetical protein, conserved (pseudogene)                  | -0,1548 | 0,4738  |
| TcCLB.509777.130 | inositol phosphosphingolipid phospholipase C-Like, putative   | -0,1549 | 0,1707  |
| TcCLB.509551.110 | hypothetical protein, conserved                               | -0,1549 | 0,231   |
| TcCLB.511523.80  | hypothetical protein, conserved                               | -0,1549 | 0,2567  |
| TcCLB.506435.290 | hypothetical protein, conserved                               | -0,1549 | 0,4356  |
| TcCLB.506321.359 | MRB1-associated protein, putative                             | -0,1549 | 0,5034  |
| TcCLB.510733.30  | hypothetical protein, conserved                               | -0,155  | 0,5303  |
| TcCLB.510483.220 | mucin-associated surface protein (MASP), putative             | -0,155  | 0,6446  |
| TcCLB.510519.40  | protein kinase, putative                                      | -0,1551 | 0,2653  |
| TcCLB.507943.99  | hypothetical protein, conserved (fragment)                    | -0,1551 | 0,5846  |
| TcCLB.506625.70  | RNA-binding protein, putative                                 | -0,1552 | 0,1223  |
| TcCLB.506821.160 | hypothetical protein, conserved                               | -0,1554 | 0,2993  |
| TcCLB.509429.200 | hypothetical protein, conserved                               | -0,1554 | 0,3506  |
| TcCLB.506425.110 | hypothetical protein, conserved                               | -0,1554 | 0,3973  |
| TcCLB.508913.25  | trans-sialidase, Group I, putative                            | -0,1554 | 0,7742  |
| TcCLB.458759.10  | profilin, putative                                            | -0,1555 | 0,3502  |
| TcCLB.507521.40  | hypothetical protein, conserved                               | -0,1555 | 0,3854  |
| TcCLB.506629.210 | hypothetical protein, conserved                               | -0,1556 | 0,2901  |
| TcCLB.510165.10  | heat shock protein DNAJ, putative                             | -0,1558 | 0,2729  |
| TcCLB.510763.50  | hypothetical protein, conserved                               | -0,1558 | 0,4104  |
| TcCLB.508721.20  | hypothetical protein, conserved                               | -0,1559 | 0,3434  |
| TcCLB.506435.70  | hypothetical protein, conserved (pseudogene)                  | -0,156  | 0,1342  |
| TcCLB.510769.110 | hypothetical protein, conserved                               | -0,156  | 0,3339  |

|                  |                                                            |         |         |
|------------------|------------------------------------------------------------|---------|---------|
| TcCLB.508765.40  | hypothetical protein                                       | -0,156  | 0,3368  |
| TcCLB.506753.40  | hypothetical protein, conserved                            | -0,156  | 0,3961  |
| TcCLB.511043.20  | small G-protein, putative                                  | -0,1561 | 0,132   |
| TcCLB.506793.100 | hypothetical protein, conserved                            | -0,1561 | 0,2344  |
| TcCLB.503635.80  | hypothetical protein, conserved                            | -0,1561 | 0,2879  |
| TcCLB.511725.120 | kinetoplast polyadenylation/uridylation factor 2, putative | -0,1562 | 0,1946  |
| TcCLB.504137.20  | hypothetical protein, conserved                            | -0,1562 | 0,2464  |
| TcCLB.504045.20  | hypothetical protein, conserved                            | -0,1563 | 0,1575  |
| TcCLB.511661.50  | small ubiquitin protein, putative                          | -0,1563 | 0,4691  |
| TcCLB.508175.70  | lanosterol synthase, putative                              | -0,1564 | 0,1449  |
| TcCLB.511517.5   | 70 kDa heat shock protein, putative (fragment)             | -0,1564 | 0,5093  |
| TcCLB.510299.50  | GPI alpha-mannosyltransferase III (GPI10)                  | -0,1565 | 0,1242  |
| TcCLB.510173.40  | MRB1 complex subunit MRB3010 (MRB3010)                     | -0,1565 | 0,2004  |
| TcCLB.508775.70  | dispersed gene family protein 1 (DGF-1), putative          | -0,1565 | 0,7562  |
| TcCLB.507089.90  | hypothetical protein, conserved                            | -0,1566 | 0,1938  |
| TcCLB.509573.60  | hypothetical protein, conserved                            | -0,1566 | 0,4947  |
| TcCLB.510397.30  | retrotransposon hot spot protein (RHS, pseudogene), putat  | -0,1566 | 0,7132  |
| TcCLB.417797.9   | hypothetical protein, conserved                            | -0,1567 | 0,381   |
| TcCLB.508823.110 | hypothetical protein, conserved                            | -0,1568 | 0,07874 |
| TcCLB.504147.224 | RNA-editing-associated protein 1, putative (REAP-1)        | -0,1568 | 0,2921  |
| TcCLB.506291.10  | mucin-associated surface protein (MASP), putative          | -0,1568 | 0,6823  |
| TcCLB.510659.140 | hypothetical protein, conserved (pseudogene)               | -0,157  | 0,1305  |
| TcCLB.503869.30  | hypothetical protein, conserved                            | -0,157  | 0,151   |
| TcCLB.508551.10  | target of rapamycin (TOR) kinase 1, putative               | -0,1571 | 0,3078  |
| TcCLB.507053.70  | geranylgeranyl transferase type II beta subunit, putative  | -0,1572 | 0,2782  |
| TcCLB.503789.34  | hypothetical protein, conserved                            | -0,1573 | 0,3116  |
| TcCLB.503909.44  | hypothetical protein, conserved                            | -0,1573 | 0,3316  |
| TcCLB.509579.34  | ATP-dependent DEAD/H RNA helicase (pseudogene), putat      | -0,1573 | 0,7253  |
| TcCLB.508295.80  | mucin TcMUCII, putative                                    | -0,1573 | 0,7512  |
| TcCLB.507105.10  | beta prime cop protein, putative                           | -0,1574 | 0,08617 |
| TcCLB.508299.40  | hypothetical protein                                       | -0,1574 | 0,2793  |
| TcCLB.506247.250 | hypothetical protein, conserved                            | -0,1575 | 0,05904 |
| TcCLB.508659.9   | TPR-repeat-containing chaperone protein DNAJ, putative (f  | -0,1575 | 0,3446  |
| TcCLB.507881.30  | glycine dehydrogenase [decarboxylating] (pseudogene), pu   | -0,1575 | 0,6585  |
| TcCLB.510435.30  | hypothetical protein, conserved                            | -0,1577 | 0,1667  |
| TcCLB.507023.250 | hypothetical protein, conserved                            | -0,1577 | 0,3092  |
| TcCLB.506679.140 | 40S ribosomal protein S10, putative                        | -0,1578 | 0,2454  |
| TcCLB.506287.80  | hypothetical protein, conserved                            | -0,1579 | 0,3039  |
| TcCLB.509171.20  | hypothetical protein, conserved                            | -0,158  | 0,2594  |
| TcCLB.506955.130 | trans-sialidase (pseudogene), putative                     | -0,1581 | 0,617   |
| TcCLB.508987.20  | hypothetical protein, conserved                            | -0,1582 | 0,1889  |
| TcCLB.505183.130 | sugar transporter, putative                                | -0,1582 | 0,4289  |
| TcCLB.506679.200 | hypothetical protein, conserved                            | -0,1583 | 0,2945  |
| TcCLB.506247.355 | hypothetical protein, conserved                            | -0,1583 | 0,5436  |
| TcCLB.509767.50  | hypothetical protein, conserved                            | -0,1584 | 0,2238  |

|                  |                                                           |         |         |
|------------------|-----------------------------------------------------------|---------|---------|
| TcCLB.510943.30  | hypothetical protein, conserved                           | -0,1584 | 0,4371  |
| TcCLB.511361.70  | hypothetical protein, conserved                           | -0,1586 | 0,2315  |
| TcCLB.508643.9   | pre-mRNA-splicing factor ATP-dependent RNA helicase, pu   | -0,1586 | 0,2771  |
| TcCLB.508515.80  | hypothetical protein, conserved                           | -0,1587 | 0,3042  |
| TcCLB.510753.30  | hypothetical protein, conserved                           | -0,1591 | 0,3271  |
| TcCLB.508181.50  | hypothetical protein, conserved                           | -0,1591 | 0,3776  |
| TcCLB.506405.70  | hypothetical protein, conserved                           | -0,1591 | 0,3826  |
| TcCLB.509203.20  | cyclin dependent kinase-binding protein, putative         | -0,1593 | 0,1568  |
| TcCLB.506529.120 | hypothetical protein                                      | -0,1593 | 0,2488  |
| TcCLB.508059.20  | hypothetical protein, conserved                           | -0,1594 | 0,3033  |
| TcCLB.510877.90  | hypothetical protein, conserved                           | -0,1595 | 0,1794  |
| TcCLB.506221.129 | hypothetical protein, conserved (fragment)                | -0,1595 | 0,389   |
| TcCLB.507711.210 | hypothetical protein, conserved                           | -0,1596 | 0,1417  |
| TcCLB.504035.84  | succinate dehydrogenase subunit                           | -0,1596 | 0,3768  |
| TcCLB.508761.70  | mucin-associated surface protein (MASP), putative         | -0,1596 | 0,5243  |
| TcCLB.506989.240 | hypothetical protein, conserved (pseudogene)              | -0,1598 | 0,09078 |
| TcCLB.509999.110 | serine/threonine-protein kinase, putative                 | -0,1598 | 0,2896  |
| TcCLB.503811.70  | hypothetical protein, conserved                           | -0,1599 | 0,1743  |
| TcCLB.506925.200 | hypothetical protein, conserved                           | -0,16   | 0,1477  |
| TcCLB.507677.129 | hypothetical protein, conserved                           | -0,16   | 0,1565  |
| TcCLB.504689.30  | trans-sialidase (pseudogene), putative                    | -0,16   | 0,596   |
| TcCLB.503545.10  | trans-sialidase (pseudogene), putative                    | -0,16   | 0,6163  |
| TcCLB.510477.90  | mucin TcMUCII, putative                                   | -0,16   | 0,7881  |
| TcCLB.511603.500 | mucin-associated surface protein (MASP), putative         | -0,16   | 0,7984  |
| TcCLB.503717.31  | mucin TcMUCII, putative                                   | -0,1602 | 0,7661  |
| TcCLB.510181.130 | hypothetical protein                                      | -0,1603 | 0,4119  |
| TcCLB.510513.20  | hypothetical protein, conserved                           | -0,1605 | 0,2596  |
| TcCLB.511127.40  | hypothetical protein                                      | -0,1606 | 0,4262  |
| TcCLB.511173.50  | mucin-associated surface protein (MASP), putative         | -0,1606 | 0,5845  |
| TcCLB.505843.24  | succinate dehydrogenase, putative                         | -0,1607 | 0,1617  |
| TcCLB.509715.20  | clathrin coat assembly protein, putative                  | -0,1607 | 0,3165  |
| TcCLB.507883.80  | adenylate kinase, putative                                | -0,1607 | 0,4693  |
| TcCLB.510021.60  | hypothetical protein                                      | -0,1607 | 0,8285  |
| TcCLB.511729.40  | 60S ribosomal protein L9, putative                        | -0,1608 | 0,3666  |
| TcCLB.508777.160 | hypothetical protein, conserved                           | -0,1609 | 0,19    |
| TcCLB.506297.210 | hypothetical protein, conserved                           | -0,161  | 0,1462  |
| TcCLB.503435.14  | hypothetical protein                                      | -0,161  | 0,2145  |
| TcCLB.507029.60  | hypothetical protein, conserved                           | -0,161  | 0,2884  |
| TcCLB.414243.29  | inosine-guanine nucleoside hydrolase, putative (fragment) | -0,161  | 0,665   |
| TcCLB.511467.50  | hypothetical protein, conserved                           | -0,1611 | 0,3318  |
| TcCLB.509049.51  | hypothetical protein, conserved                           | -0,1611 | 0,4079  |
| TcCLB.509599.110 | hypothetical protein, conserved                           | -0,1612 | 0,3023  |
| TcCLB.506537.210 | trans-sialidase (pseudogene), putative                    | -0,1612 | 0,4411  |
| TcCLB.505999.20  | phosphate-repressible phosphate permease, putative        | -0,1613 | 0,1258  |
| TcCLB.505231.10  | dynein heavy chain, putative                              | -0,1613 | 0,1804  |



|                  |                                                          |         |          |
|------------------|----------------------------------------------------------|---------|----------|
| TcCLB.509669.60  | hypothetical protein, conserved                          | -0,1613 | 0,3824   |
| TcCLB.503853.10  | hypothetical protein, conserved                          | -0,1615 | 0,2192   |
| TcCLB.509047.30  | hypothetical protein, conserved                          | -0,1616 | 0,4612   |
| TcCLB.507949.140 | ribosomal RNA-processing protein 8, putative (RRP8)      | -0,1617 | 0,2657   |
| TcCLB.510121.130 | serine/threonine protein kinase, putative                | -0,1617 | 0,5351   |
| TcCLB.506047.13  | ATP-dependent DEAD/H RNA helicase (pseudogene), putat    | -0,1617 | 0,7268   |
| TcCLB.504219.10  | hypothetical protein, conserved (pseudogene)             | -0,1618 | 0,8025   |
| TcCLB.506943.150 | hypothetical protein, conserved (pseudogene)             | -0,1619 | 0,2185   |
| TcCLB.510231.20  | hypothetical protein                                     | -0,1619 | 0,2226   |
| TcCLB.510431.220 | ribosome assembly protein RRB1, putative                 | -0,162  | 0,2905   |
| TcCLB.407335.9   | phosphatidylserine decarboxylase, putative               | -0,1621 | 0,5253   |
| TcCLB.507063.30  | hypothetical protein, conserved                          | -0,1622 | 0,3873   |
| TcCLB.510131.70  | DNA polymerase kappa, putative                           | -0,1622 | 0,4827   |
| TcCLB.506509.50  | hypothetical protein, conserved                          | -0,1623 | 0,1959   |
| TcCLB.511279.20  | hypothetical protein, conserved                          | -0,1623 | 0,2244   |
| TcCLB.508899.40  | hypothetical protein, conserved                          | -0,1624 | 0,08231  |
| TcCLB.503593.20  | hypothetical protein, conserved                          | -0,1624 | 0,1993   |
| TcCLB.509963.10  | hypothetical protein, conserved (fragment)               | -0,1624 | 0,4314   |
| TcCLB.510213.9   | mucin-associated surface protein (MASP), putative        | -0,1624 | 0,7387   |
| TcCLB.507659.10  | hypothetical protein, conserved                          | -0,1627 | 0,2262   |
| TcCLB.509179.160 | hypothetical protein, conserved                          | -0,1627 | 0,2469   |
| TcCLB.507053.190 | hypothetical protein, conserved                          | -0,1627 | 0,253    |
| TcCLB.511347.20  | mucin-associated surface protein (MASP, pseudogene), pu  | -0,1627 | 0,4877   |
| TcCLB.507049.63  | hypothetical protein, conserved                          | -0,1627 | 0,525    |
| TcCLB.506499.100 | hypothetical protein                                     | -0,1628 | 0,8656   |
| TcCLB.506743.210 | tubulin tyrosine ligase, putative                        | -0,1629 | 0,4482   |
| TcCLB.511749.9   | hypothetical protein, conserved (fragment)               | -0,163  | 0,1003   |
| TcCLB.510161.10  | hypothetical protein, conserved                          | -0,163  | 0,2231   |
| TcCLB.506939.120 | trans-sialidase, Group V, putative                       | -0,163  | 0,5751   |
| TcCLB.507877.5   | elongation factor 1-gamma (EF-1-gamma, pseudogene), p    | -0,1631 | 0,7712   |
| TcCLB.508647.160 | hypothetical protein, conserved                          | -0,1632 | 0,1218   |
| TcCLB.506681.30  | hypothetical protein, conserved                          | -0,1632 | 0,2833   |
| TcCLB.511711.20  | hypothetical protein, conserved                          | -0,1632 | 0,3182   |
| TcCLB.503727.20  | hypothetical protein, conserved                          | -0,1633 | 0,157    |
| TcCLB.511231.60  | hypothetical protein, conserved                          | -0,1633 | 0,2747   |
| TcCLB.508441.10  | NUP-1 protein, putative                                  | -0,1634 | 0,009455 |
| TcCLB.508153.990 | hypothetical protein, conserved                          | -0,1635 | 0,3083   |
| TcCLB.511293.30  | DNA-directed RNA polymerases I and III subunit RPAC1, pu | -0,1636 | 0,2585   |
| TcCLB.507625.200 | hypothetical protein, conserved                          | -0,1637 | 0,2582   |
| TcCLB.506799.150 | surface protease GP63 (pseudogene), putative             | -0,1637 | 0,6031   |
| TcCLB.510579.80  | 60S ribosomal protein L10, putative                      | -0,1638 | 0,06958  |
| TcCLB.511021.10  | protein phosphatase 2A catalytic subunit, putative       | -0,1638 | 0,3147   |
| TcCLB.510279.60  | mucin-associated surface protein (MASP), putative        | -0,1638 | 0,6525   |
| TcCLB.510303.160 | hypothetical protein, conserved                          | -0,164  | 0,1786   |
| TcCLB.506239.20  | hypothetical protein, conserved                          | -0,164  | 0,2218   |

|                  |                                                           |         |         |
|------------------|-----------------------------------------------------------|---------|---------|
| TcCLB.504009.10  | hypothetical protein, conserved                           | -0,1641 | 0,2142  |
| TcCLB.510867.19  | trans-sialidase (pseudogene), putative                    | -0,1641 | 0,3972  |
| TcCLB.503981.90  | SWI/SNF-related matrix-associated actin-dependent regul   | -0,1641 | 0,669   |
| TcCLB.510625.30  | mucin-associated surface protein (MASP, pseudogene), pu   | -0,1641 | 0,6902  |
| TcCLB.503547.20  | dispersed gene family protein 1 (DGF-1, pseudogene), put  | -0,1641 | 0,7001  |
| TcCLB.506933.50  | hypothetical protein, conserved                           | -0,1643 | 0,2018  |
| TcCLB.508899.90  | hypothetical protein                                      | -0,1643 | 0,2542  |
| TcCLB.511075.50  | hypothetical protein                                      | -0,1644 | 0,3382  |
| TcCLB.511803.20  | A/G-specific adenine glycosylase, putative                | -0,1645 | 0,2587  |
| TcCLB.506123.20  | hypothetical protein, conserved                           | -0,1645 | 0,3514  |
| TcCLB.511727.100 | hypothetical protein, conserved                           | -0,1646 | 0,1577  |
| TcCLB.510645.20  | nuclear transcription factor, putative                    | -0,1646 | 0,1882  |
| TcCLB.509513.5   | hypothetical protein, conserved (pseudogene)              | -0,1647 | 0,3856  |
| TcCLB.485889.4   | hypothetical protein, conserved                           | -0,1647 | 0,5122  |
| TcCLB.508153.500 | helicase, putative                                        | -0,1648 | 0,08157 |
| TcCLB.506577.47  | hypothetical protein, conserved                           | -0,1648 | 0,2386  |
| TcCLB.510497.199 | dispersed gene family protein 1 (DGF-1), putative (fragme | -0,1648 | 0,7209  |
| TcCLB.504147.320 | hypothetical protein, conserved                           | -0,1649 | 0,09194 |
| TcCLB.511535.39  | hypothetical protein, conserved                           | -0,1649 | 0,5558  |
| TcCLB.511109.10  | surface protein TolT (pseudogene) (TolT)                  | -0,1649 | 0,6851  |
| TcCLB.504213.110 | Putrescine-cadaverine transporter (POT1.1)                | -0,165  | 0,08811 |
| TcCLB.508647.190 | hypothetical protein, conserved                           | -0,165  | 0,2379  |
| TcCLB.511375.20  | hypothetical protein                                      | -0,165  | 0,7353  |
| TcCLB.507071.349 | mucin-associated surface protein (MASP), putative         | -0,165  | 0,8412  |
| TcCLB.509583.19  | dynein heavy chain, putative (fragment)                   | -0,1651 | 0,306   |
| TcCLB.503983.10  | hypothetical protein, conserved                           | -0,1651 | 0,4941  |
| TcCLB.511287.30  | 60S ribosomal protein L17, putative                       | -0,1652 | 0,04267 |
| TcCLB.503939.90  | hypothetical protein, conserved                           | -0,1652 | 0,1121  |
| TcCLB.508257.60  | hypothetical protein, conserved                           | -0,1655 | 0,4239  |
| TcCLB.510691.70  | hypothetical protein, conserved                           | -0,1656 | 0,4641  |
| TcCLB.508097.40  | trans-sialidase (pseudogene), putative                    | -0,1656 | 0,6649  |
| TcCLB.508577.60  | hypothetical protein, conserved                           | -0,1657 | 0,1312  |
| TcCLB.511277.350 | tubulin-specific chaperone, putative                      | -0,1657 | 0,1463  |
| TcCLB.507937.10  | mucin TcMUCII, putative                                   | -0,1657 | 0,8181  |
| TcCLB.506493.70  | serine/threonine protein kinase, putative                 | -0,1658 | 0,1432  |
| TcCLB.511761.10  | UDP-sugar pyrophosphorylase (Sloppy)                      | -0,1658 | 0,2021  |
| TcCLB.511589.240 | hypothetical protein, conserved                           | -0,1658 | 0,254   |
| TcCLB.507049.80  | hypothetical protein, conserved                           | -0,1658 | 0,3453  |
| TcCLB.442629.9   | hypothetical protein, conserved                           | -0,1658 | 0,3878  |
| TcCLB.507927.50  | metallo-beta-lactamase superfamily, putative              | -0,1659 | 0,3743  |
| TcCLB.506319.10  | hypothetical protein                                      | -0,166  | 0,07218 |
| TcCLB.503461.30  | hypothetical protein, conserved                           | -0,166  | 0,1472  |
| TcCLB.509627.30  | proteasome regulatory non-ATPase subunit 11, putative (R  | -0,166  | 0,1564  |
| TcCLB.511211.235 | hypothetical protein, conserved                           | -0,166  | 0,4106  |
| TcCLB.506569.60  | retrotransposon hot spot protein (RHS, pseudogene), putat | -0,166  | 0,5418  |

|                  |                                                                  |         |         |
|------------------|------------------------------------------------------------------|---------|---------|
| TcCLB.507611.114 | retrotransposon hot spot protein (RHS, pseudogene), putative     | -0,166  | 0,5692  |
| TcCLB.511589.160 | replication factor C, subunit 4, putative                        | -0,1662 | 0,26    |
| TcCLB.505183.120 | aldo/keto reductase, putative                                    | -0,1662 | 0,298   |
| TcCLB.511507.90  | hypothetical protein, conserved                                  | -0,1662 | 0,3246  |
| TcCLB.510837.30  | hypothetical protein, conserved                                  | -0,1663 | 0,3034  |
| TcCLB.509489.10  | hypothetical protein, conserved                                  | -0,1664 | 0,2047  |
| TcCLB.509605.10  | malonyl-CoA decarboxylase, mitochondrial precursor, putative     | -0,1664 | 0,3971  |
| TcCLB.506567.90  | hypothetical protein, conserved                                  | -0,1665 | 0,2916  |
| TcCLB.509567.30  | serine/threonine-protein kinase, putative                        | -0,1666 | 0,1365  |
| TcCLB.510889.110 | primase 2, putative                                              | -0,1668 | 0,1918  |
| TcCLB.503955.60  | hypothetical protein, conserved                                  | -0,1668 | 0,3135  |
| TcCLB.510263.30  | surface protease GP63, putative                                  | -0,1668 | 0,4703  |
| TcCLB.510663.57  | transport protein particle (TRAPP) subunit, putative             | -0,167  | 0,3503  |
| TcCLB.503973.120 | mucin-associated surface protein (MASP), putative                | -0,167  | 0,5941  |
| TcCLB.510967.13  | hypothetical protein, conserved                                  | -0,1671 | 0,5467  |
| TcCLB.436535.19  | Glucose-6-phosphate dehydrogenase, putative                      | -0,1671 | 0,6533  |
| TcCLB.503751.10  | hypothetical protein                                             | -0,1672 | 0,2621  |
| TcCLB.508491.9   | hypothetical protein, conserved                                  | -0,1672 | 0,5446  |
| TcCLB.511553.60  | hypothetical protein                                             | -0,1672 | 0,7615  |
| TcCLB.508533.10  | hypothetical protein, conserved                                  | -0,1673 | 0,1839  |
| TcCLB.506869.60  | protein kinase, putative                                         | -0,1673 | 0,2099  |
| TcCLB.503847.30  | hypothetical protein, conserved                                  | -0,1673 | 0,3089  |
| TcCLB.425851.9   | hypothetical protein, conserved                                  | -0,1673 | 0,4544  |
| TcCLB.510015.50  | mucin TcMUC (pseudogene), putative                               | -0,1673 | 0,6212  |
| TcCLB.511867.110 | flap endonuclease-1 (FEN-1), putative                            | -0,1675 | 0,1656  |
| TcCLB.507837.80  | TBC1 domain family member 20/GTPase, putative                    | -0,1675 | 0,3869  |
| TcCLB.507989.40  | ATP-dependent DEAD/H DNA helicase recQ, putative                 | -0,1677 | 0,1034  |
| TcCLB.509647.80  | hypothetical protein, conserved                                  | -0,1677 | 0,2398  |
| TcCLB.506459.280 | hypothetical protein, conserved                                  | -0,1677 | 0,2851  |
| TcCLB.509179.170 | hypothetical protein                                             | -0,1677 | 0,3052  |
| TcCLB.508521.112 | beta galactofuranosyl glycosyltransferase (pseudogene), putative | -0,1677 | 0,6324  |
| TcCLB.508273.130 | hypothetical protein                                             | -0,1677 | 0,6966  |
| TcCLB.506297.240 | pretranslocation protein, alpha subunit, putative                | -0,1678 | 0,05681 |
| TcCLB.510187.360 | hypothetical protein, conserved                                  | -0,1678 | 0,1395  |
| TcCLB.425597.5   | hypothetical protein, conserved (pseudogene)                     | -0,1679 | 0,5487  |
| TcCLB.503487.40  | hypothetical protein, conserved                                  | -0,168  | 0,1392  |
| TcCLB.505939.20  | oligopeptidase B-like protein, putative                          | -0,1683 | 0,07924 |
| TcCLB.510665.4   | hypothetical protein, conserved (fragment)                       | -0,1683 | 0,2686  |
| TcCLB.506315.50  | 60S ribosomal protein L13a, putative                             | -0,1684 | 0,0445  |
| TcCLB.510533.120 | translation initiation factor IF-2, putative                     | -0,1685 | 0,1609  |
| TcCLB.508479.20  | hypothetical protein, conserved (pseudogene)                     | -0,1685 | 0,486   |
| TcCLB.506557.30  | hypothetical protein, conserved                                  | -0,1686 | 0,1749  |
| TcCLB.508165.280 | mucin-associated surface protein (MASP), putative                | -0,1687 | 0,7155  |
| TcCLB.506573.60  | hypothetical protein, conserved                                  | -0,1689 | 0,2655  |
| TcCLB.509801.10  | hypothetical protein, conserved                                  | -0,1691 | 0,2102  |

|                  |                                                           |         |         |
|------------------|-----------------------------------------------------------|---------|---------|
| TcCLB.506893.70  | hypothetical protein, conserved                           | -0,1691 | 0,2897  |
| TcCLB.511753.110 | hypothetical protein, conserved                           | -0,1692 | 0,05164 |
| TcCLB.510431.270 | hypothetical protein, conserved                           | -0,1692 | 0,1771  |
| TcCLB.510483.234 | mucin TcMUC (pseudogene), putative                        | -0,1692 | 0,7116  |
| TcCLB.440099.28  | protein kinase, putative                                  | -0,1694 | 0,4321  |
| TcCLB.507809.170 | protein kinase, putative                                  | -0,1694 | 0,636   |
| TcCLB.511403.40  | mucin-associated surface protein (MASP, pseudogene), pu   | -0,1694 | 0,7267  |
| TcCLB.511625.40  | protein phosphatase 2C, putative                          | -0,1695 | 0,3545  |
| TcCLB.510289.80  | hypothetical protein, conserved                           | -0,1695 | 0,3841  |
| TcCLB.509753.20  | trans-sialidase (pseudogene), putative                    | -0,1695 | 0,5356  |
| TcCLB.508689.5   | hypothetical protein, conserved (pseudogene)              | -0,1696 | 0,4398  |
| TcCLB.507063.240 | hypothetical protein, conserved (pseudogene)              | -0,1697 | 0,04562 |
| TcCLB.506147.140 | hypothetical protein, conserved                           | -0,1697 | 0,1656  |
| TcCLB.509179.200 | hypothetical protein, conserved                           | -0,1697 | 0,5417  |
| TcCLB.511249.30  | hypothetical protein, conserved                           | -0,1698 | 0,09529 |
| TcCLB.511067.4   | phosphatidylinositol 3-kinase, putative                   | -0,1699 | 0,3602  |
| TcCLB.507305.20  | casein kinase, putative                                   | -0,17   | 0,09091 |
| TcCLB.503939.30  | ttagg binding factor, putative                            | -0,17   | 0,218   |
| TcCLB.506863.50  | ribosomal RNA processing protein 45, putative (RRP45)     | -0,17   | 0,4005  |
| TcCLB.412943.9   | hypothetical protein, conserved                           | -0,1701 | 0,4197  |
| TcCLB.508219.70  | mucin-associated surface protein (MASP), putative         | -0,1702 | 0,7192  |
| TcCLB.506679.110 | dynein heavy chain, putative                              | -0,1703 | 0,09389 |
| TcCLB.510213.70  | mucin-associated surface protein (MASP), putative         | -0,1703 | 0,6584  |
| TcCLB.504241.57  | retrotransposon hot spot protein (RHS, pseudogene), putat | -0,1703 | 0,7206  |
| TcCLB.511907.290 | hypothetical protein, conserved                           | -0,1705 | 0,2159  |
| TcCLB.506953.49  | glucose-6-phosphate 1-dehydrogenase, putative             | -0,1706 | 0,6437  |
| TcCLB.509393.50  | hypothetical protein, conserved                           | -0,1707 | 0,1506  |
| TcCLB.509567.50  | hypothetical protein, conserved                           | -0,1707 | 0,2669  |
| TcCLB.508397.60  | methyltransferase, putative                               | -0,1707 | 0,3906  |
| TcCLB.507711.220 | hypothetical protein, conserved                           | -0,1708 | 0,5008  |
| TcCLB.509693.20  | plectin, putative                                         | -0,1709 | 0,06042 |
| TcCLB.509965.240 | hypothetical protein, conserved                           | -0,1709 | 0,3116  |
| TcCLB.506635.100 | ATP dependent DEAD-box helicase, putative (RH)            | -0,1711 | 0,2018  |
| TcCLB.509793.30  | kinetoplast DNA-associated protein, putative              | -0,1712 | 0,249   |
| TcCLB.511301.44  | hypothetical protein, conserved                           | -0,1712 | 0,2661  |
| TcCLB.507167.190 | trans-sialidase (pseudogene), putative                    | -0,1712 | 0,5455  |
| TcCLB.508987.30  | serine/threonine-protein kinase, putative                 | -0,1714 | 0,1152  |
| TcCLB.508897.80  | hypothetical protein, conserved                           | -0,1714 | 0,1285  |
| TcCLB.503939.120 | hypothetical protein, conserved                           | -0,1715 | 0,1516  |
| TcCLB.510653.19  | hypothetical protein, conserved (fragment)                | -0,1715 | 0,2881  |
| TcCLB.506195.130 | hypothetical protein, conserved                           | -0,1716 | 0,3478  |
| TcCLB.508277.60  | hypothetical protein, conserved                           | -0,1717 | 0,06608 |
| TcCLB.511233.14  | 40S ribosomal protein S27, putative                       | -0,1717 | 0,07009 |
| TcCLB.507087.40  | kinesin, putative                                         | -0,1717 | 0,102   |
| TcCLB.503799.10  | DNA repair protein RAD50, putative                        | -0,1718 | 0,08086 |

|                  |                                                           |         |         |
|------------------|-----------------------------------------------------------|---------|---------|
| TcCLB.460127.20  | metallo- peptidase, Clan M- Family M48 (FACE1)            | -0,1718 | 0,2368  |
| TcCLB.503579.100 | nucleotide-binding protein, putative                      | -0,1719 | 0,2624  |
| TcCLB.510305.20  | hypothetical protein, conserved                           | -0,1719 | 0,2949  |
| TcCLB.511851.30  | trans-sialidase (pseudogene), putative                    | -0,1719 | 0,3009  |
| TcCLB.508799.100 | hypothetical protein, conserved                           | -0,172  | 0,2051  |
| TcCLB.504239.350 | mucin-associated surface protein (MASP), putative         | -0,1721 | 0,5197  |
| TcCLB.505997.70  | ATPase, putative                                          | -0,1721 | 0,8084  |
| TcCLB.509875.250 | hypothetical protein, conserved                           | -0,1722 | 0,3145  |
| TcCLB.506435.200 | hypothetical protein, conserved                           | -0,1722 | 0,3934  |
| TcCLB.509967.189 | kinesin, putative (fragment)                              | -0,1722 | 0,4834  |
| TcCLB.506603.43  | hypothetical protein                                      | -0,1722 | 0,5283  |
| TcCLB.510307.77  | N-acetyltransferase complex ARD1 subunit (pseudogene),    | -0,1722 | 0,5605  |
| TcCLB.506811.80  | hypothetical protein, conserved                           | -0,1723 | 0,26    |
| TcCLB.507949.110 | zeta tubulin, putative                                    | -0,1725 | 0,227   |
| TcCLB.507833.10  | mucin-associated surface protein (MASP), putative         | -0,1727 | 0,7782  |
| TcCLB.511717.100 | hypothetical protein, conserved                           | -0,1728 | 0,2041  |
| TcCLB.511899.20  | hypothetical protein, conserved                           | -0,1728 | 0,2546  |
| TcCLB.507083.70  | Iron-sulfur assembly protein 1, putative (Isa1)           | -0,1729 | 0,2552  |
| TcCLB.504147.30  | hypothetical protein, conserved                           | -0,1731 | 0,1763  |
| TcCLB.509695.40  | hypothetical protein, conserved                           | -0,1731 | 0,1813  |
| TcCLB.507685.20  | trans-sialidase (pseudogene), putative                    | -0,1731 | 0,5963  |
| TcCLB.508257.140 | Aquaporin 2                                               | -0,1732 | 0,1636  |
| TcCLB.506811.150 | hypothetical protein, conserved                           | -0,1732 | 0,2163  |
| TcCLB.511895.60  | hypothetical protein, conserved                           | -0,1732 | 0,312   |
| TcCLB.511283.170 | hypothetical protein, conserved                           | -0,1733 | 0,03309 |
| TcCLB.506435.120 | ATP-dependent RNA helicase, putative                      | -0,1733 | 0,07469 |
| TcCLB.508169.100 | hypothetical protein, conserved                           | -0,1733 | 0,2351  |
| TcCLB.510123.20  | mitogen activated protein kinase, putative                | -0,1734 | 0,1099  |
| TcCLB.508387.170 | double-strand-break repair protein rad21 homolog, putativ | -0,1734 | 0,1335  |
| TcCLB.507649.40  | hypothetical protein, conserved                           | -0,1734 | 0,2724  |
| TcCLB.510431.190 | hypothetical protein                                      | -0,1736 | 0,03877 |
| TcCLB.506445.40  | ubiquitin hydrolase (pseudogene), putative                | -0,1736 | 0,1206  |
| TcCLB.508873.330 | trans-sialidase, Group V, putative                        | -0,1736 | 0,5365  |
| TcCLB.508727.40  | hypothetical protein, conserved                           | -0,1738 | 0,2764  |
| TcCLB.510823.50  | hypothetical protein, conserved                           | -0,1739 | 0,1715  |
| TcCLB.503419.20  | adenosine deaminase-like protein, putative (ADAT1h)       | -0,1739 | 0,2322  |
| TcCLB.510911.58  | retrotransposon hot spot protein (RHS, pseudogene), putat | -0,1739 | 0,7272  |
| TcCLB.506925.100 | hypothetical protein, conserved                           | -0,174  | 0,2498  |
| TcCLB.506747.30  | ubiquitin hydrolase, putative                             | -0,1741 | 0,09918 |
| TcCLB.509695.120 | epsilon tubulin, putative                                 | -0,1741 | 0,2376  |
| TcCLB.506287.209 | DNA ligase, putative                                      | -0,1742 | 0,1885  |
| TcCLB.504243.40  | hypothetical protein, conserved                           | -0,1743 | 0,1094  |
| TcCLB.506817.60  | hypothetical protein, conserved                           | -0,1743 | 0,2709  |
| TcCLB.507967.10  | hypothetical protein                                      | -0,1744 | 0,236   |
| TcCLB.504689.20  | mucin-associated surface protein (MASP, pseudogene), pu   | -0,1744 | 0,4888  |

|                  |                                                              |         |         |
|------------------|--------------------------------------------------------------|---------|---------|
| TcCLB.503551.20  | hypothetical protein, conserved                              | -0,1744 | 0,8151  |
| TcCLB.506733.30  | hypothetical protein, conserved                              | -0,1745 | 0,09549 |
| TcCLB.506273.10  | trans-sialidase (pseudogene), putative                       | -0,1745 | 0,4081  |
| TcCLB.507951.80  | Present in the outer mitochondrial membrane proteome 2!      | -0,1746 | 0,1612  |
| TcCLB.503793.10  | 2-oxoglutarate dehydrogenase subunit, putative               | -0,1746 | 0,2752  |
| TcCLB.508355.350 | hypothetical protein, conserved                              | -0,1747 | 0,2281  |
| TcCLB.507257.150 | hypothetical protein, conserved                              | -0,1748 | 0,2356  |
| TcCLB.509109.190 | hypothetical protein, conserved                              | -0,1748 | 0,3637  |
| TcCLB.508153.950 | 6-phosphofructo-2-kinase 1                                   | -0,1749 | 0,04674 |
| TcCLB.506753.120 | DnaJ chaperone protein, putative                             | -0,1749 | 0,1591  |
| TcCLB.505807.200 | hypothetical protein, conserved                              | -0,1749 | 0,1727  |
| TcCLB.506417.30  | hypothetical protein, conserved                              | -0,175  | 0,3755  |
| TcCLB.509597.10  | hypothetical protein, conserved                              | -0,1751 | 0,1185  |
| TcCLB.504159.90  | hypothetical protein, conserved                              | -0,1751 | 0,1202  |
| TcCLB.510815.9   | dispersed gene family protein 1 (DGF-1), putative            | -0,1751 | 0,2109  |
| TcCLB.506743.30  | 50S ribosomal protein L17, putative                          | -0,1751 | 0,3326  |
| TcCLB.511893.10  | ribonuclease inhibitor, putative                             | -0,1752 | 0,09636 |
| TcCLB.506459.260 | hypothetical protein, conserved                              | -0,1752 | 0,1057  |
| TcCLB.504741.220 | hypothetical protein, conserved                              | -0,1752 | 0,2769  |
| TcCLB.507677.140 | hypothetical protein, conserved                              | -0,1752 | 0,7992  |
| TcCLB.511239.150 | histone acetyltransferase, putative                          | -0,1754 | 0,2443  |
| TcCLB.506613.110 | mucin-associated surface protein (MASP, pseudogene), pu      | -0,1754 | 0,6316  |
| TcCLB.509965.319 | hypothetical protein, conserved                              | -0,1755 | 0,1525  |
| TcCLB.508199.80  | EF hand, putative                                            | -0,1756 | 0,1903  |
| TcCLB.509429.120 | Mitochondrial Ribosomal Protein of Small Subunit 29, puta    | -0,1756 | 0,2253  |
| TcCLB.508707.290 | hypothetical protein                                         | -0,1756 | 0,3116  |
| TcCLB.509775.34  | hypothetical protein, conserved                              | -0,1756 | 0,3419  |
| TcCLB.511323.20  | hypothetical protein, conserved                              | -0,1756 | 0,3897  |
| TcCLB.436761.20  | hypothetical protein, conserved (fragment)                   | -0,1756 | 0,7188  |
| TcCLB.504039.175 | hypothetical protein, conserved (pseudogene)                 | -0,1757 | 0,6932  |
| TcCLB.511803.15  | dynein light chain lc6, flagellar outer arm (pseudogene), pu | -0,176  | 0,4289  |
| TcCLB.511577.10  | hypothetical protein, conserved                              | -0,176  | 0,5301  |
| TcCLB.511707.39  | hypothetical protein, conserved                              | -0,1761 | 0,1029  |
| TcCLB.511529.100 | hypothetical protein, conserved                              | -0,1761 | 0,2903  |
| TcCLB.510175.170 | glycine dehydrogenase [decarboxylating] (pseudogene), pu     | -0,1761 | 0,4438  |
| TcCLB.511127.110 | ATP-dependent protease ATPase subunit HslU2 (HslU2)          | -0,1762 | 0,08104 |
| TcCLB.504103.80  | hypothetical protein, conserved                              | -0,1762 | 0,1906  |
| TcCLB.506955.150 | mucin-associated surface protein (MASP), putative            | -0,1762 | 0,5733  |
| TcCLB.511421.24  | kelch domain-containing protein                              | -0,1764 | 0,2474  |
| TcCLB.510043.50  | hypothetical protein, conserved                              | -0,1765 | 0,05114 |
| TcCLB.511445.70  | hypothetical protein, conserved                              | -0,1765 | 0,1622  |
| TcCLB.508083.20  | hypothetical protein, conserved                              | -0,1767 | 0,3851  |
| TcCLB.511867.190 | tubulin gamma chain (TUBG)                                   | -0,1768 | 0,125   |
| TcCLB.504021.130 | hypothetical protein, conserved                              | -0,1768 | 0,3503  |
| TcCLB.507735.50  | hypothetical protein, conserved (pseudogene)                 | -0,1769 | 0,04971 |

|                  |                                                            |         |         |
|------------------|------------------------------------------------------------|---------|---------|
| TcCLB.506887.50  | katanin, putative                                          | -0,177  | 0,255   |
| TcCLB.509985.40  | hypothetical protein, conserved                            | -0,177  | 0,2582  |
| TcCLB.508121.80  | mucin TcMUCII, putative                                    | -0,177  | 0,7861  |
| TcCLB.510099.70  | hypothetical protein, conserved                            | -0,1771 | 0,111   |
| TcCLB.511739.20  | hypothetical protein, conserved                            | -0,1772 | 0,1662  |
| TcCLB.508805.20  | hypothetical protein, conserved                            | -0,1773 | 0,08214 |
| TcCLB.509399.160 | CCR4-NOT transcription complex subunit 2, putative         | -0,1773 | 0,1604  |
| TcCLB.508525.40  | hypothetical protein, conserved                            | -0,1775 | 0,1902  |
| TcCLB.506357.140 | Periodic tryptophan protein 2 homolog, putative            | -0,1776 | 0,1272  |
| TcCLB.511389.140 | hypothetical protein, conserved                            | -0,1776 | 0,2932  |
| TcCLB.510351.100 | hypothetical protein, conserved                            | -0,1776 | 0,3208  |
| TcCLB.503803.10  | rRNA biogenesis protein, putative                          | -0,1777 | 0,1708  |
| TcCLB.507093.260 | multidrug resistance protein, mitochondrial, putative (ABC | -0,1778 | 0,01904 |
| TcCLB.510999.39  | 40S ribosomal protein S3A, putative (fragment)             | -0,1778 | 0,1163  |
| TcCLB.510759.50  | hypothetical protein                                       | -0,1778 | 0,2145  |
| TcCLB.510517.60  | hypothetical protein, conserved                            | -0,1778 | 0,3159  |
| TcCLB.507515.70  | hypothetical protein, conserved                            | -0,1779 | 0,09933 |
| TcCLB.511285.70  | hypothetical protein, conserved                            | -0,1781 | 0,07749 |
| TcCLB.507089.80  | exosome-associated protein 2, putative (EAP2)              | -0,1782 | 0,3051  |
| TcCLB.508257.104 | ribosomal protein L14, putative                            | -0,1782 | 0,4106  |
| TcCLB.509979.379 | hypothetical protein, conserved                            | -0,1783 | 0,2352  |
| TcCLB.506017.31  | ATP-dependent DEAD/H RNA helicase (pseudogene), putat      | -0,1785 | 0,6112  |
| TcCLB.507467.50  | hypothetical protein, conserved                            | -0,1786 | 0,2642  |
| TcCLB.510395.20  | hypothetical protein, conserved                            | -0,1786 | 0,301   |
| TcCLB.504197.15  | surface protease GP63 (pseudogene), putative               | -0,1786 | 0,705   |
| TcCLB.503847.10  | hypothetical protein, conserved (pseudogene)               | -0,1787 | 0,1386  |
| TcCLB.507611.210 | hypothetical protein                                       | -0,1787 | 0,7462  |
| TcCLB.511297.10  | hypothetical protein, conserved                            | -0,1788 | 0,04833 |
| TcCLB.506935.19  | hypothetical protein, conserved (fragment)                 | -0,1788 | 0,5195  |
| TcCLB.503973.271 | surface protease GP63 (pseudogene), putative               | -0,1789 | 0,6053  |
| TcCLB.509549.120 | endosomal integral membrane protein (pseudogene), puta     | -0,179  | 0,142   |
| TcCLB.508741.350 | hypothetical protein, conserved                            | -0,179  | 0,1709  |
| TcCLB.509837.30  | hypothetical protein                                       | -0,179  | 0,3239  |
| TcCLB.511901.10  | Trypanosome basal body component protein (TBBC)            | -0,179  | 0,357   |
| TcCLB.511001.40  | hypothetical protein                                       | -0,1791 | 0,187   |
| TcCLB.511847.89  | hypothetical protein, conserved                            | -0,1791 | 0,4932  |
| TcCLB.508389.20  | hypothetical protein                                       | -0,1792 | 0,1466  |
| TcCLB.510603.20  | hypothetical protein, conserved                            | -0,1792 | 0,3635  |
| TcCLB.506795.90  | hypothetical protein, conserved                            | -0,1793 | 0,07346 |
| TcCLB.506063.34  | hypothetical protein, conserved (pseudogene)               | -0,1793 | 0,08819 |
| TcCLB.508409.150 | hypothetical protein, conserved                            | -0,1794 | 0,09087 |
| TcCLB.507993.89  | hypothetical protein, conserved                            | -0,1794 | 0,3783  |
| TcCLB.506625.19  | dispersed gene family protein 1 (DGF-1), putative (fragme  | -0,1794 | 0,6141  |
| TcCLB.507007.74  | small nuclear ribonucleoprotein Sm-F, putative             | -0,1795 | 0,5227  |
| TcCLB.509291.20  | mucin-associated surface protein (MASP), putative          | -0,1796 | 0,7835  |

|                  |                                                           |         |         |
|------------------|-----------------------------------------------------------|---------|---------|
| TcCLB.511881.30  | hypothetical protein, conserved                           | -0,1797 | 0,1882  |
| TcCLB.511855.60  | hypothetical protein, conserved                           | -0,1797 | 0,2394  |
| TcCLB.511143.39  | hypothetical protein, conserved                           | -0,1797 | 0,4381  |
| TcCLB.506893.50  | hypothetical protein, conserved                           | -0,1797 | 0,5145  |
| TcCLB.508307.160 | hypothetical protein, conserved                           | -0,1799 | 0,1166  |
| TcCLB.504109.10  | hypothetical protein, conserved                           | -0,1799 | 0,1176  |
| TcCLB.506369.50  | hypothetical protein, conserved                           | -0,1799 | 0,2803  |
| TcCLB.506753.190 | hypothetical protein, conserved                           | -0,18   | 0,2914  |
| TcCLB.508775.35  | retrotransposon hot spot protein (RHS, pseudogene), putat | -0,1801 | 0,7226  |
| TcCLB.504741.80  | hypothetical protein, conserved                           | -0,1802 | 0,2534  |
| TcCLB.509715.80  | hypothetical protein, conserved                           | -0,1803 | 0,1531  |
| TcCLB.510525.120 | hypothetical protein, conserved                           | -0,1803 | 0,2253  |
| TcCLB.506839.20  | hypothetical protein                                      | -0,1804 | 0,1059  |
| TcCLB.506499.40  | mucin-associated surface protein (MASP), putative         | -0,1804 | 0,6988  |
| TcCLB.507071.34  | mucin TcMUCII, putative                                   | -0,1804 | 0,8086  |
| TcCLB.509571.4   | PAB1-binding protein , putative                           | -0,1805 | 0,06659 |
| TcCLB.506647.10  | hypothetical protein, conserved                           | -0,1805 | 0,1462  |
| TcCLB.503455.30  | hypothetical protein, conserved                           | -0,1805 | 0,1548  |
| TcCLB.503891.30  | phosphatidylinositol-4-phosphate 5-kinase, putative       | -0,1805 | 0,2872  |
| TcCLB.510359.69  | mitochondrial carrier protein, putative                   | -0,1806 | 0,2595  |
| TcCLB.508243.50  | mucin-associated surface protein (MASP), putative         | -0,1806 | 0,6601  |
| TcCLB.509979.187 | surface protease GP63 (pseudogene), putative              | -0,1808 | 0,6685  |
| TcCLB.508637.150 | ribonuclease L inhibitor, putative                        | -0,1809 | 0,0613  |
| TcCLB.511159.14  | hypothetical protein, conserved                           | -0,1809 | 0,09378 |
| TcCLB.507653.30  | hypothetical protein                                      | -0,1809 | 0,5431  |
| TcCLB.509537.80  | hypothetical protein, conserved                           | -0,181  | 0,03334 |
| TcCLB.510031.40  | hypothetical protein                                      | -0,181  | 0,3383  |
| TcCLB.509735.140 | trans-sialidase (pseudogene), putative                    | -0,181  | 0,3608  |
| TcCLB.507539.40  | cell cycle sequence binding phosphoprotein (RBP33), putat | -0,1811 | 0,09456 |
| TcCLB.509287.150 | retrotransposon hot spot protein (RHS, pseudogene), putat | -0,1811 | 0,2307  |
| TcCLB.510105.90  | hypothetical protein, conserved                           | -0,1812 | 0,179   |
| TcCLB.508699.60  | hypothetical protein, conserved                           | -0,1812 | 0,2419  |
| TcCLB.506859.120 | hypothetical protein                                      | -0,1814 | 0,2021  |
| TcCLB.508533.40  | ecotin, putative                                          | -0,1814 | 0,2816  |
| TcCLB.509395.50  | hypothetical protein, conserved                           | -0,1815 | 0,06785 |
| TcCLB.511825.130 | hypothetical protein                                      | -0,1815 | 0,4438  |
| TcCLB.506181.20  | hypothetical protein, conserved                           | -0,1816 | 0,1446  |
| TcCLB.511127.20  | calcium binding protein EF hand, putative                 | -0,1817 | 0,07932 |
| TcCLB.463673.9   | hypothetical protein, conserved                           | -0,1817 | 0,3029  |
| TcCLB.510759.80  | hypothetical protein, conserved                           | -0,182  | 0,06656 |
| TcCLB.504131.170 | ubiquitin carboxyl-terminal hydrolase, putative           | -0,182  | 0,1004  |
| TcCLB.508355.190 | choline kinase                                            | -0,182  | 0,1149  |
| TcCLB.507257.110 | hypothetical protein, conserved                           | -0,182  | 0,3208  |
| TcCLB.507611.270 | hypothetical protein, conserved                           | -0,1822 | 0,3295  |
| TcCLB.506725.60  | hypothetical protein, conserved                           | -0,1822 | 0,4228  |



|                  |                                                               |         |         |
|------------------|---------------------------------------------------------------|---------|---------|
| TcCLB.511217.30  | diacylglycerol kinase, putative                               | -0,1823 | 0,1769  |
| TcCLB.508209.39  | hypothetical protein, conserved                               | -0,1823 | 0,2046  |
| TcCLB.509911.70  | mu-adaptin 4, putative                                        | -0,1823 | 0,2474  |
| TcCLB.511163.59  | hypothetical protein, conserved (fragment)                    | -0,1824 | 0,4953  |
| TcCLB.509203.10  | 2,3-bisphosphoglycerate-independent phosphoglycerate m        | -0,1825 | 0,5239  |
| TcCLB.508199.30  | hypothetical protein, conserved                               | -0,1826 | 0,2298  |
| TcCLB.510655.30  | helicase, putative                                            | -0,1829 | 0,0253  |
| TcCLB.503959.60  | hypothetical protein, conserved                               | -0,183  | 0,1175  |
| TcCLB.507049.100 | mitochondrial RNA binding protein, putative                   | -0,183  | 0,1964  |
| TcCLB.510609.130 | hypothetical protein, conserved                               | -0,183  | 0,2025  |
| TcCLB.510743.90  | hypothetical protein, conserved                               | -0,183  | 0,2901  |
| TcCLB.511211.110 | hypothetical protein, conserved                               | -0,1831 | 0,07996 |
| TcCLB.506559.240 | hypothetical protein, conserved                               | -0,1831 | 0,09102 |
| TcCLB.510289.20  | hypothetical protein, conserved                               | -0,1831 | 0,1274  |
| TcCLB.504171.20  | hypothetical protein, conserved                               | -0,1831 | 0,3211  |
| TcCLB.508479.480 | N-acetyltransferase complex ARD1 subunit (pseudogene),        | -0,1832 | 0,5195  |
| TcCLB.510261.10  | mucin-associated surface protein (MASP), putative             | -0,1832 | 0,6093  |
| TcCLB.508181.110 | hypothetical protein, conserved                               | -0,1833 | 0,1155  |
| TcCLB.506275.70  | hypothetical protein, conserved                               | -0,1833 | 0,1672  |
| TcCLB.509747.40  | hypothetical protein, conserved                               | -0,1833 | 0,176   |
| TcCLB.510149.130 | hypothetical protein, conserved                               | -0,1833 | 0,2824  |
| TcCLB.507677.100 | hypothetical protein, conserved                               | -0,1834 | 0,2799  |
| TcCLB.506853.60  | hypothetical protein, conserved                               | -0,1834 | 0,3417  |
| TcCLB.504097.4   | nucleoplasmin-like protein (NLP), putative                    | -0,1835 | 0,1968  |
| TcCLB.504131.110 | hypothetical protein, conserved                               | -0,1835 | 0,2807  |
| TcCLB.510265.110 | hypothetical protein, conserved                               | -0,1835 | 0,7163  |
| TcCLB.510105.40  | cullin-like protein, putative                                 | -0,1836 | 0,06367 |
| TcCLB.506743.140 | hypothetical protein, conserved                               | -0,1836 | 0,2134  |
| TcCLB.510241.30  | hypothetical protein, conserved                               | -0,1836 | 0,2365  |
| TcCLB.510241.50  | 60S ribosomal protein L10, putative                           | -0,1838 | 0,02756 |
| TcCLB.508153.980 | hypothetical protein, conserved                               | -0,1839 | 0,07401 |
| TcCLB.504883.50  | hypothetical protein, conserved                               | -0,1839 | 0,07615 |
| TcCLB.507913.10  | hypothetical protein, conserved                               | -0,184  | 0,5193  |
| TcCLB.507963.79  | nucleosome assembly protein, putative                         | -0,1841 | 0,05781 |
| TcCLB.503959.30  | hypothetical protein, conserved                               | -0,1841 | 0,06851 |
| TcCLB.507949.150 | conserved protein, unknown function                           | -0,1841 | 0,1258  |
| TcCLB.510381.60  | proliferator-activated receptor-interacting protein (PRIP) ir | -0,1841 | 0,3157  |
| TcCLB.507823.30  | hypothetical protein, conserved                               | -0,1842 | 0,1582  |
| TcCLB.506247.320 | methyltransferase, putative                                   | -0,1843 | 0,1061  |
| TcCLB.508909.200 | hypothetical protein                                          | -0,1843 | 0,1077  |
| TcCLB.511153.130 | DNA-direcetd RNA polymerase II, subunit 9, putative           | -0,1843 | 0,3921  |
| TcCLB.509109.110 | hypothetical protein, conserved                               | -0,1843 | 0,4176  |
| TcCLB.510001.50  | hypothetical protein, conserved                               | -0,1845 | 0,4     |
| TcCLB.511183.170 | trans-sialidase (pseudogene), putative                        | -0,1845 | 0,6342  |
| TcCLB.509175.18  | hypothetical protein, conserved                               | -0,1846 | 0,3634  |

|                  |                                                               |         |         |
|------------------|---------------------------------------------------------------|---------|---------|
| TcCLB.510373.40  | hypothetical protein                                          | -0,1846 | 0,7844  |
| TcCLB.507801.179 | vesicle-associated membrane protein                           | -0,1847 | 0,1994  |
| TcCLB.510021.180 | trans-sialidase, Group V, putative                            | -0,1848 | 0,5862  |
| TcCLB.506453.30  | mucin-associated surface protein (MASP), putative             | -0,1848 | 0,7152  |
| TcCLB.508285.5   | trans-sialidase (pseudogene), putative                        | -0,185  | 0,5584  |
| TcCLB.398265.9   | trans-sialidase, putative                                     | -0,185  | 0,7876  |
| TcCLB.506965.190 | mucin TcMUCII, putative                                       | -0,185  | 0,8016  |
| TcCLB.511215.20  | hypothetical protein                                          | -0,1851 | 0,03577 |
| TcCLB.507081.90  | hypothetical protein, conserved                               | -0,1851 | 0,1648  |
| TcCLB.510961.10  | mucin-associated surface protein (MASP), putative             | -0,1851 | 0,6549  |
| TcCLB.504131.150 | SNF2 family protein                                           | -0,1852 | 0,2356  |
| TcCLB.506247.300 | hypothetical protein, conserved                               | -0,1852 | 0,2824  |
| TcCLB.510655.70  | hypothetical protein, conserved                               | -0,1853 | 0,3314  |
| TcCLB.507913.30  | proliferative cell nuclear antigen (PCNA), putative           | -0,1855 | 0,0743  |
| TcCLB.429257.10  | hypothetical protein, conserved                               | -0,1855 | 0,4974  |
| TcCLB.506737.40  | hypothetical protein, conserved                               | -0,1856 | 0,08544 |
| TcCLB.506979.50  | hypothetical protein, conserved                               | -0,1856 | 0,1094  |
| TcCLB.505171.44  | hypothetical protein, conserved                               | -0,1857 | 0,4772  |
| TcCLB.511529.180 | hypothetical protein, conserved                               | -0,1858 | 0,1744  |
| TcCLB.505231.20  | trans-sialidase, Group II, putative                           | -0,1858 | 0,3457  |
| TcCLB.508629.63  | ATP-dependent DEAD/H RNA helicase (pseudogene), putative      | -0,1859 | 0,614   |
| TcCLB.505945.10  | DNA repair and recombination helicase protein PIF5, putative  | -0,186  | 0,07909 |
| TcCLB.510769.150 | hypothetical protein, conserved                               | -0,1862 | 0,1209  |
| TcCLB.509121.20  | dispersed gene family protein 1 (DGF-1, pseudogene), putative | -0,1863 | 0,3213  |
| TcCLB.511275.20  | hypothetical protein, conserved                               | -0,1864 | 0,142   |
| TcCLB.510241.40  | hypothetical protein, conserved                               | -0,1865 | 0,2352  |
| TcCLB.510731.130 | hypothetical protein, conserved                               | -0,1865 | 0,5343  |
| TcCLB.511417.129 | hypothetical protein, conserved                               | -0,1865 | 0,6663  |
| TcCLB.509185.10  | retrotransposon hot spot protein (RHS, pseudogene), putative  | -0,1865 | 0,737   |
| TcCLB.510421.170 | hypothetical protein, conserved                               | -0,1866 | 0,02816 |
| TcCLB.506963.110 | NUDIX hydrolase 3, putative (Nudix3)                          | -0,1866 | 0,3273  |
| TcCLB.508607.10  | retrotransposon hot spot (RHS) protein, putative              | -0,1866 | 0,6943  |
| TcCLB.511621.40  | hypothetical protein, conserved                               | -0,1867 | 0,1964  |
| TcCLB.507047.90  | hypothetical protein                                          | -0,1867 | 0,253   |
| TcCLB.506175.40  | hypothetical protein, conserved                               | -0,1868 | 0,1269  |
| TcCLB.504253.30  | hypothetical protein, conserved                               | -0,1871 | 0,1434  |
| TcCLB.510901.110 | hypothetical protein, conserved                               | -0,1871 | 0,2964  |
| TcCLB.508153.170 | ubiquinone biosynthesis protein COQ7 homolog, putative        | -0,1871 | 0,4253  |
| TcCLB.507527.20  | hypothetical protein, conserved                               | -0,1872 | 0,109   |
| TcCLB.506989.50  | hypothetical protein, conserved                               | -0,1872 | 0,249   |
| TcCLB.511621.190 | dual specificity protein phosphatase, putative                | -0,1874 | 0,3009  |
| TcCLB.427789.10  | hypothetical protein, conserved                               | -0,1874 | 0,4677  |
| TcCLB.509103.39  | dynein heavy chain, putative                                  | -0,1875 | 0,1008  |
| TcCLB.506855.60  | hypothetical protein, conserved                               | -0,1875 | 0,1798  |
| TcCLB.509749.30  | hypothetical protein, conserved                               | -0,1876 | 0,2983  |

|                  |                                                           |         |         |
|------------------|-----------------------------------------------------------|---------|---------|
| TcCLB.509029.150 | hypothetical protein, conserved                           | -0,1877 | 0,3763  |
| TcCLB.510357.60  | hypothetical protein, conserved                           | -0,1877 | 0,4872  |
| TcCLB.511409.70  | hypothetical protein, conserved                           | -0,1878 | 0,2133  |
| TcCLB.511619.5   | FtsJ cell division protein, putative (fragment)           | -0,188  | 0,1867  |
| TcCLB.509941.30  | retrotransposon hot spot protein (RHS, pseudogene), putat | -0,188  | 0,2761  |
| TcCLB.507023.230 | splicing factor 3a, putative                              | -0,1881 | 0,1464  |
| TcCLB.510959.30  | mucin-associated surface protein (MASP), putative         | -0,1881 | 0,6026  |
| TcCLB.509483.10  | surface protease GP63, putative                           | -0,1881 | 0,7757  |
| TcCLB.510437.60  | hypothetical protein, conserved                           | -0,1882 | 0,3171  |
| TcCLB.508089.10  | trans-sialidase, Group I, putative                        | -0,1882 | 0,3605  |
| TcCLB.507771.20  | hypothetical protein, conserved                           | -0,1883 | 0,1803  |
| TcCLB.506223.100 | hypothetical protein, conserved                           | -0,1883 | 0,2037  |
| TcCLB.506933.40  | DNA replication licensing factor MCM2, putative           | -0,1885 | 0,08803 |
| TcCLB.509791.110 | hypothetical protein, conserved                           | -0,1885 | 0,1557  |
| TcCLB.506247.80  | DNA-binding protein, putative                             | -0,1885 | 0,1852  |
| TcCLB.506123.50  | hypothetical protein, conserved                           | -0,1885 | 0,301   |
| TcCLB.506767.230 | mucin-associated surface protein (MASP), putative         | -0,1885 | 0,5766  |
| TcCLB.507817.60  | Present in the outer mitochondrial membrane proteome 3.   | -0,1886 | 0,06504 |
| TcCLB.509345.11  | retrotransposon hot spot protein (RHS, pseudogene), putat | -0,1886 | 0,1666  |
| TcCLB.506451.80  | mucin-associated surface protein (MASP, pseudogene), pu   | -0,1886 | 0,5006  |
| TcCLB.504179.50  | hypothetical protein                                      | -0,1887 | 0,1049  |
| TcCLB.510335.10  | hypothetical protein, conserved                           | -0,1887 | 0,1423  |
| TcCLB.511765.10  | trans-sialidase (pseudogene), putative                    | -0,1887 | 0,6102  |
| TcCLB.503465.10  | hypothetical protein, conserved                           | -0,1888 | 0,141   |
| TcCLB.507257.120 | hypothetical protein, conserved                           | -0,1888 | 0,3027  |
| TcCLB.508385.50  | hypothetical protein, conserved                           | -0,1889 | 0,2535  |
| TcCLB.507071.80  | trans-sialidase, Group VI, putative                       | -0,1889 | 0,6453  |
| TcCLB.510715.20  | trans-sialidase, Group V, putative                        | -0,189  | 0,5029  |
| TcCLB.506637.90  | hypothetical protein, conserved                           | -0,1891 | 0,07706 |
| TcCLB.508153.710 | hypothetical protein                                      | -0,1893 | 0,2036  |
| TcCLB.508153.780 | hypothetical protein                                      | -0,1894 | 0,06861 |
| TcCLB.510517.50  | hypothetical protein, conserved                           | -0,1894 | 0,1065  |
| TcCLB.510371.100 | mucin-associated surface protein (MASP), putative         | -0,1894 | 0,6745  |
| TcCLB.511129.47  | hypothetical protein, conserved (pseudogene)              | -0,1895 | 0,4139  |
| TcCLB.507611.389 | hypothetical protein, conserved                           | -0,1895 | 0,4883  |
| TcCLB.504089.14  | hypothetical protein, conserved                           | -0,1896 | 0,07706 |
| TcCLB.508257.244 | hypothetical protein, conserved                           | -0,1896 | 0,4213  |
| TcCLB.511001.9   | 40S ribosomal protein S3A, putative                       | -0,1897 | 0,2143  |
| TcCLB.510551.50  | trans-sialidase, putative                                 | -0,1897 | 0,7735  |
| TcCLB.510659.210 | chaperone DNAJ protein, putative                          | -0,1898 | 0,06965 |
| TcCLB.510265.100 | hypothetical protein, conserved                           | -0,1898 | 0,109   |
| TcCLB.510213.39  | mucin-associated surface protein (MASP), putative         | -0,1898 | 0,5357  |
| TcCLB.508739.11  | trans-sialidase (pseudogene), putative                    | -0,1898 | 0,5438  |
| TcCLB.507867.80  | hypothetical protein, conserved                           | -0,19   | 0,04653 |
| TcCLB.511165.100 | serine/threonine protein kinase, putative                 | -0,1901 | 0,2244  |

|                  |                                                           |         |         |
|------------------|-----------------------------------------------------------|---------|---------|
| TcCLB.508879.90  | hypothetical protein, conserved                           | -0,1901 | 0,3113  |
| TcCLB.508277.250 | hypothetical protein, conserved                           | -0,1902 | 0,09868 |
| TcCLB.510769.40  | hypothetical protein, conserved                           | -0,1902 | 0,2306  |
| TcCLB.509941.70  | dispersed gene family protein 1 (DGF-1, pseudogene), puta | -0,1902 | 0,4195  |
| TcCLB.507951.179 | hypothetical protein, conserved                           | -0,1904 | 0,1795  |
| TcCLB.507555.70  | trans-sialidase (pseudogene), putative                    | -0,1904 | 0,3842  |
| TcCLB.510827.40  | hypothetical protein                                      | -0,1906 | 0,4476  |
| TcCLB.510283.60  | hypothetical protein, conserved                           | -0,1907 | 0,3469  |
| TcCLB.511585.130 | ubiquitin activating enzyme, putative                     | -0,1908 | 0,1474  |
| TcCLB.509213.50  | hypothetical protein, conserved                           | -0,1909 | 0,2674  |
| TcCLB.480975.10  | hypothetical protein, conserved                           | -0,191  | 0,2366  |
| TcCLB.506765.46  | mucin-associated surface protein (MASP, pseudogene), pu   | -0,191  | 0,4029  |
| TcCLB.511283.130 | MEKK-related kinase 1, putative (MRK1)                    | -0,1911 | 0,1099  |
| TcCLB.506155.70  | SWI/SNF-related helicase, putative                        | -0,1912 | 0,0301  |
| TcCLB.510777.29  | eukaryotic translation initiation factor 4E, putative     | -0,1912 | 0,4343  |
| TcCLB.503723.90  | glyceraldehyde 3-phosphate dehydrogenase, C-terminal do   | -0,1912 | 0,579   |
| TcCLB.506167.20  | hypothetical protein, conserved                           | -0,1913 | 0,03579 |
| TcCLB.506355.60  | small G-protein, putative                                 | -0,1913 | 0,06485 |
| TcCLB.510823.80  | cytoplasmic l-asparaginase i-like protein, putative       | -0,1913 | 0,3298  |
| TcCLB.509665.16  | elongation factor 1-gamma (EF-1-gamma, pseudogene), p     | -0,1913 | 0,7272  |
| TcCLB.503589.10  | GDP-mannose pyrophosphorylase                             | -0,1914 | 0,1605  |
| TcCLB.508165.140 | mucin TcMUCII (pseudogene), putative                      | -0,1914 | 0,7596  |
| TcCLB.511229.60  | hypothetical protein, conserved                           | -0,1915 | 0,5535  |
| TcCLB.508737.30  | mitochondrial RNA binding protein 1                       | -0,1916 | 0,01482 |
| TcCLB.510445.30  | hypothetical protein, conserved                           | -0,1916 | 0,1665  |
| TcCLB.503691.9   | hypothetical protein, conserved (fragment)                | -0,1916 | 0,2802  |
| TcCLB.510421.300 | hypothetical protein, conserved                           | -0,1916 | 0,298   |
| TcCLB.511543.10  | hypothetical protein, conserved                           | -0,1916 | 0,316   |
| TcCLB.506885.280 | NIMA-related kinase, putative                             | -0,1916 | 0,5552  |
| TcCLB.508047.30  | trans-sialidase (pseudogene), putative                    | -0,1916 | 0,6359  |
| TcCLB.511917.10  | trans-sialidase, putative                                 | -0,1917 | 0,4602  |
| TcCLB.508175.250 | hypothetical protein, conserved                           | -0,1919 | 0,05794 |
| TcCLB.509023.110 | ATP-dependent protease ATPase subunit HslU2 (HslU2)       | -0,1919 | 0,06733 |
| TcCLB.503579.150 | RNA editing 3' terminal uridylyl transferase 2, putative  | -0,1919 | 0,2078  |
| TcCLB.509049.10  | hypothetical protein, conserved                           | -0,1919 | 0,3498  |
| TcCLB.507677.90  | hypothetical protein, conserved                           | -0,192  | 0,1474  |
| TcCLB.504109.120 | hypothetical protein, conserved                           | -0,192  | 0,2343  |
| TcCLB.507787.30  | hypothetical protein, conserved                           | -0,192  | 0,4091  |
| TcCLB.506201.110 | hypothetical protein, conserved                           | -0,1921 | 0,2074  |
| TcCLB.507057.10  | hypothetical protein, conserved                           | -0,1921 | 0,2119  |
| TcCLB.507771.80  | hypothetical protein, conserved                           | -0,1922 | 0,1126  |
| TcCLB.508153.634 | hypothetical protein, conserved                           | -0,1922 | 0,349   |
| TcCLB.508325.130 | protein kinase, putative                                  | -0,1923 | 0,1878  |
| TcCLB.511671.90  | hypothetical protein, conserved                           | -0,1923 | 0,2285  |
| TcCLB.509487.20  | hypothetical protein, conserved                           | -0,1923 | 0,236   |

|                  |                                                                |         |         |
|------------------|----------------------------------------------------------------|---------|---------|
| TcCLB.511725.190 | vacuolar sorting protein, putative                             | -0,1923 | 0,2463  |
| TcCLB.509097.28  | hypothetical protein, conserved                                | -0,1923 | 0,4598  |
| TcCLB.506475.30  | hypothetical protein, conserved                                | -0,1924 | 0,1143  |
| TcCLB.506287.120 | hypothetical protein                                           | -0,1924 | 0,1442  |
| TcCLB.508539.60  | mucin-associated surface protein (MASP), putative              | -0,1924 | 0,6613  |
| TcCLB.506211.210 | mitogen-activated protein kinase kinase kinase, putative (C    | -0,1925 | 0,07706 |
| TcCLB.509029.50  | hypothetical protein, conserved                                | -0,1925 | 0,3058  |
| TcCLB.504427.50  | AMPK subunit beta, putative (AMPKB)                            | -0,1926 | 0,1993  |
| TcCLB.508313.122 | trans-sialidase (pseudogene), putative                         | -0,1926 | 0,806   |
| TcCLB.510737.40  | transport protein particle (TRAPP) subunit, putative           | -0,1927 | 0,2715  |
| TcCLB.506295.80  | ADP-ribosylation factor-like 2, arl2, putative (ARL2)          | -0,1927 | 0,5479  |
| TcCLB.506067.179 | elongation factor 1-gamma (EF-1-gamma, pseudogene), p          | -0,1927 | 0,7669  |
| TcCLB.424123.10  | hypothetical protein, conserved (pseudogene)                   | -0,1928 | 0,2027  |
| TcCLB.503619.29  | hypothetical protein, conserved                                | -0,1928 | 0,4205  |
| TcCLB.506367.40  | hypothetical protein, conserved                                | -0,1929 | 0,1175  |
| TcCLB.506661.90  | hypothetical protein, conserved                                | -0,193  | 0,1056  |
| TcCLB.509715.140 | hypothetical protein, conserved                                | -0,193  | 0,3324  |
| TcCLB.504057.145 | cytochrome b5-like Heme/Steroid binding domain containi        | -0,1931 | 0,1968  |
| TcCLB.506627.70  | hypothetical protein                                           | -0,1931 | 0,2136  |
| TcCLB.503809.24  | hypothetical protein, conserved                                | -0,1931 | 0,3811  |
| TcCLB.508219.30  | surface protease GP63 (pseudogene), putative                   | -0,1931 | 0,7562  |
| TcCLB.510121.150 | serine/threonine protein kinase, putative                      | -0,1932 | 0,1269  |
| TcCLB.507213.30  | potassium voltage-gated channel, putative                      | -0,1932 | 0,1397  |
| TcCLB.503637.20  | hypothetical protein, conserved                                | -0,1933 | 0,08666 |
| TcCLB.507677.150 | G1 cyclin CycE4, putative (CYC5)                               | -0,1933 | 0,09578 |
| TcCLB.503789.70  | hypothetical protein, conserved                                | -0,1933 | 0,106   |
| TcCLB.509549.10  | trans-sialidase, Group V, putative                             | -0,1933 | 0,5382  |
| TcCLB.511545.50  | hypothetical protein, conserved                                | -0,1934 | 0,1195  |
| TcCLB.510105.130 | phosphatidylinositol-4-phosphate 5-kinase type II beta, put    | -0,1934 | 0,1587  |
| TcCLB.511013.6   | N-acetyltransferase complex ARD1 subunit (pseudogene),         | -0,1934 | 0,7408  |
| TcCLB.506257.80  | hypothetical protein, conserved                                | -0,1935 | 0,2319  |
| TcCLB.509065.160 | eukaryotic translation initiation factor 3 subunit 7-like prot | -0,1936 | 0,01386 |
| TcCLB.508355.160 | hypothetical protein, conserved                                | -0,1937 | 0,06718 |
| TcCLB.509455.130 | cAMP response protein, putative (CARP4)                        | -0,1937 | 0,08118 |
| TcCLB.503717.71  | trans-sialidase (pseudogene), putative                         | -0,1937 | 0,7979  |
| TcCLB.503895.10  | hypothetical protein, conserved                                | -0,1939 | 0,143   |
| TcCLB.506357.160 | hypothetical protein, conserved                                | -0,1939 | 0,3534  |
| TcCLB.507565.10  | dispersed gene family protein 1 (DGF-1, pseudogene), puta      | -0,194  | 0,5478  |
| TcCLB.505363.15  | elongation factor 1-gamma (EF-1-gamma, pseudogene), p          | -0,194  | 0,6125  |
| TcCLB.507047.140 | hypothetical protein, conserved                                | -0,1941 | 0,1361  |
| TcCLB.509033.70  | hypothetical protein, conserved                                | -0,1941 | 0,2876  |
| TcCLB.506267.101 | surface protease GP63 (pseudogene), putative                   | -0,1941 | 0,6178  |
| TcCLB.508647.230 | synaptojanin (pseudogene), putative                            | -0,1942 | 0,02616 |
| TcCLB.506559.70  | hypothetical protein, conserved                                | -0,1942 | 0,1463  |
| TcCLB.506519.80  | hypothetical protein, conserved                                | -0,1942 | 0,2737  |

|                  |                                                           |         |         |
|------------------|-----------------------------------------------------------|---------|---------|
| TcCLB.511527.50  | AUT2/APG4/ATG4 cysteine peptidase, putative               | -0,1943 | 0,1267  |
| TcCLB.506673.40  | hypothetical protein, conserved                           | -0,1943 | 0,1308  |
| TcCLB.506821.30  | glycosylphosphatidylinositol-specific phospholipase C     | -0,1943 | 0,1749  |
| TcCLB.508873.439 | mucin TcMUCII (pseudogene), putative                      | -0,1943 | 0,7521  |
| TcCLB.506509.30  | hypothetical protein, conserved                           | -0,1945 | 0,1152  |
| TcCLB.468941.9   | ATP-dependent DEAD/H RNA helicase, putative (fragment)    | -0,1946 | 0,1004  |
| TcCLB.509561.110 | hypothetical protein, conserved                           | -0,1947 | 0,1258  |
| TcCLB.510877.110 | hypothetical protein, conserved                           | -0,1948 | 0,01747 |
| TcCLB.507795.20  | hypothetical protein, conserved                           | -0,1948 | 0,21    |
| TcCLB.506493.20  | hypothetical protein                                      | -0,1949 | 0,5558  |
| TcCLB.510941.10  | hypothetical protein, conserved                           | -0,195  | 0,138   |
| TcCLB.510685.20  | hypothetical protein                                      | -0,195  | 0,2794  |
| TcCLB.506577.80  | trans-sialidase, Group VIII, putative                     | -0,1952 | 0,3119  |
| TcCLB.507057.40  | hypothetical protein, conserved                           | -0,1952 | 0,3567  |
| TcCLB.510659.279 | nucleic acid binding protein, putative                    | -0,1953 | 0,3199  |
| TcCLB.510279.50  | mucin TcMUCII (pseudogene), putative                      | -0,1954 | 0,7524  |
| TcCLB.510943.190 | myosin heavy chain MYA2-related, putative                 | -0,1956 | 0,06361 |
| TcCLB.506581.40  | hypothetical protein, conserved                           | -0,1957 | 0,1526  |
| TcCLB.509021.9   | dispersed gene family protein 1 (DGF-1), putative         | -0,1957 | 0,7654  |
| TcCLB.511603.300 | mucin-associated surface protein (MASP), putative         | -0,1958 | 0,5564  |
| TcCLB.511277.120 | hypothetical protein, conserved                           | -0,1959 | 0,09006 |
| TcCLB.507001.70  | syntaxin, putative                                        | -0,196  | 0,2133  |
| TcCLB.505807.160 | hypothetical protein, conserved                           | -0,196  | 0,3212  |
| TcCLB.508331.50  | hypothetical protein, conserved                           | -0,1961 | 0,1983  |
| TcCLB.509385.19  | retrotransposon hot spot protein (RHS, pseudogene), putat | -0,1961 | 0,603   |
| TcCLB.508851.180 | 14-3-3 protein 1, putative (14-3-3-I)                     | -0,1962 | 0,02235 |
| TcCLB.511491.70  | endosomal integral membrane protein, putative             | -0,1962 | 0,08346 |
| TcCLB.508301.10  | hypothetical protein, conserved                           | -0,1962 | 0,2494  |
| TcCLB.506587.44  | hypothetical protein                                      | -0,1962 | 0,3782  |
| TcCLB.504013.100 | ribosomal protein S19, putative                           | -0,1963 | 0,0161  |
| TcCLB.507089.190 | hypothetical protein, conserved                           | -0,1963 | 0,1364  |
| TcCLB.509951.40  | hypothetical protein                                      | -0,1963 | 0,3851  |
| TcCLB.511385.70  | hypothetical protein                                      | -0,1963 | 0,5418  |
| TcCLB.505183.40  | DNA repair and recombination protein RAD54, putative      | -0,1965 | 0,03645 |
| TcCLB.506241.190 | hypothetical protein, conserved                           | -0,1966 | 0,2677  |
| TcCLB.506519.130 | guanosine monophosphate reductase, putative               | -0,1967 | 0,05266 |
| TcCLB.508153.70  | hypothetical protein, conserved                           | -0,1967 | 0,2111  |
| TcCLB.507209.30  | hypothetical protein, conserved                           | -0,1968 | 0,05261 |
| TcCLB.506135.100 | hypothetical protein, conserved                           | -0,1968 | 0,3343  |
| TcCLB.506893.25  | U6 snRNA-associated Sm-like protein LSm6p                 | -0,1968 | 0,6088  |
| TcCLB.504105.200 | hypothetical protein, conserved                           | -0,1969 | 0,02656 |
| TcCLB.506241.40  | hypothetical protein, conserved                           | -0,1969 | 0,1467  |
| TcCLB.511537.16  | hypothetical protein, conserved                           | -0,1969 | 0,1954  |
| TcCLB.510283.90  | hypothetical protein, conserved                           | -0,197  | 0,1413  |
| TcCLB.506815.50  | hypothetical protein, conserved                           | -0,197  | 0,1544  |

|                  |                                                              |         |         |
|------------------|--------------------------------------------------------------|---------|---------|
| TcCLB.506679.150 | 40S ribosomal protein S10, putative                          | -0,197  | 0,1784  |
| TcCLB.510943.80  | ABC transporter, putative                                    | -0,1971 | 0,0304  |
| TcCLB.510353.10  | major vault protein, putative                                | -0,1972 | 0,0197  |
| TcCLB.504427.280 | hypothetical protein, conserved                              | -0,1974 | 0,1483  |
| TcCLB.509161.149 | hypothetical protein, conserved                              | -0,1974 | 0,4266  |
| TcCLB.506883.100 | GTP-binding protein, putative                                | -0,1975 | 0,1047  |
| TcCLB.506801.70  | hypothetical protein                                         | -0,1975 | 0,1113  |
| TcCLB.510965.20  | mitochondrial inner membrane signal peptidase, putative      | -0,1975 | 0,3948  |
| TcCLB.506443.80  | synaptojanin (N-terminal domain), putative                   | -0,1976 | 0,07108 |
| TcCLB.511807.250 | hypothetical protein, conserved                              | -0,1976 | 0,0874  |
| TcCLB.504199.30  | kinesin-like protein, putative                               | -0,1976 | 0,1451  |
| TcCLB.509719.69  | hypothetical protein, conserved                              | -0,1976 | 0,1829  |
| TcCLB.507801.230 | trans-sialidase (pseudogene), putative                       | -0,1976 | 0,4365  |
| TcCLB.509623.10  | hypothetical protein, conserved                              | -0,1977 | 0,1613  |
| TcCLB.510759.200 | hypothetical protein, conserved                              | -0,1978 | 0,1531  |
| TcCLB.503823.169 | kinetoplastid kinetochore protein 2, putative (fragment) (kl | -0,1979 | 0,1796  |
| TcCLB.511323.30  | hypothetical protein, conserved                              | -0,1979 | 0,2234  |
| TcCLB.511237.110 | cyclophilin, putative                                        | -0,198  | 0,1724  |
| TcCLB.510737.110 | replication factor C, subunit 3, putative                    | -0,198  | 0,1944  |
| TcCLB.503637.10  | hypothetical protein, conserved                              | -0,198  | 0,2705  |
| TcCLB.509509.50  | hypothetical protein, conserved                              | -0,1981 | 0,2117  |
| TcCLB.511577.4   | CLC-type chloride channel, putative (fragment)               | -0,1981 | 0,5302  |
| TcCLB.507989.20  | sigma-adaptin 3, putative                                    | -0,1982 | 0,2949  |
| TcCLB.510255.4   | hypothetical protein, conserved                              | -0,1982 | 0,6154  |
| TcCLB.510697.55  | mucin TcMUCII (pseudogene), putative                         | -0,1985 | 0,6615  |
| TcCLB.508125.14  | mucin-associated surface protein (MASP), putative (fragm     | -0,1985 | 0,6909  |
| TcCLB.511021.20  | hypothetical protein                                         | -0,1986 | 0,3853  |
| TcCLB.511181.10  | hypothetical protein, conserved                              | -0,1987 | 0,1328  |
| TcCLB.508999.40  | hypothetical protein, conserved                              | -0,1989 | 0,1786  |
| TcCLB.506591.69  | hypothetical protein, conserved                              | -0,199  | 0,1094  |
| TcCLB.508031.10  | dispersed gene family protein 1 (DGF-1, pseudogene), puta    | -0,1991 | 0,5216  |
| TcCLB.508771.40  | hypothetical protein, conserved                              | -0,1992 | 0,3048  |
| TcCLB.509161.140 | hypothetical protein, conserved                              | -0,1993 | 0,1317  |
| TcCLB.509885.40  | hypothetical protein, conserved                              | -0,1993 | 0,1339  |
| TcCLB.507727.19  | hypothetical protein                                         | -0,1993 | 0,5343  |
| TcCLB.508707.340 | serine/threonine protein phosphatase, putative (fragment)    | -0,1994 | 0,415   |
| TcCLB.503965.30  | hypothetical protein, conserved                              | -0,1995 | 0,2452  |
| TcCLB.511531.59  | mitogen activated protein kinase, putative                   | -0,1995 | 0,2893  |
| TcCLB.508911.10  | hypothetical protein, conserved                              | -0,1996 | 0,02996 |
| TcCLB.506941.270 | DNA-J protein, putative                                      | -0,1996 | 0,1893  |
| TcCLB.506767.389 | surface protease GP63 (pseudogene), putative                 | -0,1996 | 0,7218  |
| TcCLB.509067.30  | mitochondrial RNA binding protein, putative                  | -0,1997 | 0,06654 |
| TcCLB.509911.90  | peptidase, putative                                          | -0,1998 | 0,01795 |
| TcCLB.503703.10  | hypothetical protein, conserved                              | -0,1998 | 0,1938  |
| TcCLB.510661.220 | hypothetical protein, conserved                              | -0,1998 | 0,2089  |

|                  |                                                                     |         |         |
|------------------|---------------------------------------------------------------------|---------|---------|
| TcCLB.511127.290 | hypothetical protein, conserved                                     | -0,2    | 0,08007 |
| TcCLB.506885.394 | hypothetical protein, conserved                                     | -0,2    | 0,2392  |
| TcCLB.510329.210 | SNF1-related protein kinase catalytic subunit alpha, putative       | -0,2001 | 0,03439 |
| TcCLB.503789.40  | signal recognition particle (pseudogene), putative                  | -0,2001 | 0,05801 |
| TcCLB.507813.10  | structural maintenance of chromosome 3 protein, putative            | -0,2001 | 0,2719  |
| TcCLB.506279.60  | trans-sialidase, Group VI, putative                                 | -0,2001 | 0,3546  |
| TcCLB.506591.50  | hypothetical protein, conserved (pseudogene)                        | -0,2002 | 0,02403 |
| TcCLB.506247.20  | hypothetical protein                                                | -0,2002 | 0,1179  |
| TcCLB.511713.9   | hypothetical protein, conserved                                     | -0,2003 | 0,4607  |
| TcCLB.507005.20  | hypothetical protein, conserved                                     | -0,2004 | 0,1893  |
| TcCLB.503861.30  | trans-sialidase (pseudogene), putative                              | -0,2004 | 0,2824  |
| TcCLB.511671.100 | hypothetical protein, conserved                                     | -0,2004 | 0,3607  |
| TcCLB.511255.200 | mucin-associated surface protein (MASP), putative                   | -0,2004 | 0,665   |
| TcCLB.508707.149 | hypothetical protein, conserved                                     | -0,2005 | 0,2739  |
| TcCLB.510997.50  | ATP-dependent DEAD/H RNA helicase (pseudogene), putative            | -0,2007 | 0,1528  |
| TcCLB.510075.40  | hypothetical protein, conserved                                     | -0,2007 | 0,2453  |
| TcCLB.507093.130 | hypothetical protein, conserved                                     | -0,2008 | 0,0668  |
| TcCLB.419703.10  | hypothetical protein                                                | -0,2008 | 0,495   |
| TcCLB.508355.300 | hypothetical protein, conserved                                     | -0,2009 | 0,1903  |
| TcCLB.509047.50  | metallo-beta-lactamase superfamily, putative                        | -0,2009 | 0,3113  |
| TcCLB.511153.80  | hypothetical protein                                                | -0,201  | 0,238   |
| TcCLB.507673.30  | hypothetical protein, conserved                                     | -0,2011 | 0,1868  |
| TcCLB.503579.130 | hypothetical protein, conserved                                     | -0,2011 | 0,2362  |
| TcCLB.510187.199 | hypothetical protein, conserved                                     | -0,2011 | 0,2713  |
| TcCLB.508955.20  | hypothetical protein, conserved                                     | -0,2012 | 0,03636 |
| TcCLB.507969.20  | hypothetical protein, conserved                                     | -0,2012 | 0,2394  |
| TcCLB.507603.180 | ubiquitin hydrolase, putative                                       | -0,2013 | 0,06549 |
| TcCLB.504045.90  | hypothetical protein, conserved (pseudogene)                        | -0,2013 | 0,26    |
| TcCLB.503823.80  | hypothetical protein, conserved                                     | -0,2013 | 0,3289  |
| TcCLB.506537.130 | protein kinase, putative                                            | -0,2014 | 0,5373  |
| TcCLB.511727.129 | ribosomal protein L18, putative                                     | -0,2015 | 0,02165 |
| TcCLB.510311.10  | hypothetical protein, conserved                                     | -0,2015 | 0,08048 |
| TcCLB.506375.20  | hypothetical protein, conserved (pseudogene)                        | -0,2016 | 0,1125  |
| TcCLB.505807.100 | hypothetical protein, conserved                                     | -0,2016 | 0,2162  |
| TcCLB.506343.20  | dispersed gene family protein 1 (DGF-1, pseudogene), putative       | -0,2016 | 0,5289  |
| TcCLB.511897.10  | TFIIH basal transcription factor complex helicase subunit, putative | -0,2017 | 0,1139  |
| TcCLB.508355.20  | hypothetical protein, conserved                                     | -0,2017 | 0,3758  |
| TcCLB.507093.280 | hypothetical protein                                                | -0,2018 | 0,02623 |
| TcCLB.509007.90  | hypothetical protein                                                | -0,2018 | 0,2548  |
| TcCLB.507663.70  | hypothetical protein, conserved                                     | -0,2019 | 0,228   |
| TcCLB.510897.80  | hypothetical protein, conserved                                     | -0,2019 | 0,3359  |
| TcCLB.508461.470 | hypothetical protein, conserved                                     | -0,202  | 0,1228  |
| TcCLB.504217.10  | coatamer subunit epsilon (COPE)                                     | -0,202  | 0,1893  |
| TcCLB.511287.180 | Associated kinase of Tb14-3-3, putative (AKB1)                      | -0,202  | 0,3881  |
| TcCLB.507713.10  | hypothetical protein, conserved                                     | -0,202  | 0,4672  |



|                  |                                                                |         |         |
|------------------|----------------------------------------------------------------|---------|---------|
| TcCLB.509597.4   | hypothetical protein, conserved                                | -0,2021 | 0,1202  |
| TcCLB.511277.220 | hypothetical protein, conserved                                | -0,2021 | 0,1574  |
| TcCLB.506289.30  | hypothetical protein, conserved                                | -0,2021 | 0,2533  |
| TcCLB.508121.90  | mucin-associated surface protein (MASP, pseudogene), pu        | -0,2021 | 0,6474  |
| TcCLB.509237.20  | hypothetical protein, conserved                                | -0,2022 | 0,04333 |
| TcCLB.508233.40  | hypothetical protein                                           | -0,2022 | 0,1463  |
| TcCLB.511277.380 | hypothetical protein, conserved                                | -0,2022 | 0,4925  |
| TcCLB.509551.95  | anaphase promoting complex subunit protein, putative           | -0,2022 | 0,5382  |
| TcCLB.511183.210 | mucin TcMUCII, putative                                        | -0,2022 | 0,5827  |
| TcCLB.511173.380 | mucin TcMUCII (pseudogene), putative                           | -0,2023 | 0,7562  |
| TcCLB.507521.80  | hypothetical protein, conserved                                | -0,2024 | 0,1017  |
| TcCLB.508909.230 | calcium-transporting ATPase (pseudogene), putative             | -0,2024 | 0,1691  |
| TcCLB.509805.80  | hypothetical protein, conserved                                | -0,2025 | 0,1209  |
| TcCLB.506457.70  | hypothetical protein, conserved                                | -0,2025 | 0,3187  |
| TcCLB.509951.30  | hypothetical protein, conserved                                | -0,2026 | 0,08812 |
| TcCLB.506127.120 | hypothetical protein, conserved                                | -0,2027 | 0,1763  |
| TcCLB.508543.170 | hypothetical protein, conserved                                | -0,2028 | 0,06088 |
| TcCLB.510187.80  | endonuclease V, putative                                       | -0,2029 | 0,2383  |
| TcCLB.506937.20  | hypothetical protein, conserved                                | -0,2029 | 0,4774  |
| TcCLB.510013.230 | mucin-associated surface protein (MASP), putative              | -0,2029 | 0,6609  |
| TcCLB.507437.21  | elongation factor 1-gamma (EF-1-gamma, pseudogene), p          | -0,203  | 0,718   |
| TcCLB.508375.5   | elongation factor 1-gamma (EF-1-gamma, pseudogene), p          | -0,2031 | 0,4426  |
| TcCLB.510717.40  | hypothetical protein, conserved                                | -0,2033 | 0,09177 |
| TcCLB.506227.230 | N-acetyltransferase complex ARD1 subunit, putative             | -0,2033 | 0,1361  |
| TcCLB.508521.18  | trans-sialidase, putative (pseudogene)                         | -0,2033 | 0,6536  |
| TcCLB.508169.90  | eukaryotic translation initiation factor 3 subunit L, putative | -0,2034 | 0,01509 |
| TcCLB.510311.110 | hypothetical protein, conserved                                | -0,2034 | 0,1554  |
| TcCLB.504057.80  | Present in the outer mitochondrial membrane proteome 2:        | -0,2035 | 0,06772 |
| TcCLB.507063.270 | histone deacetylase, putative                                  | -0,2035 | 0,1074  |
| TcCLB.511211.170 | heat shock protein 70 (hsp70), putative                        | -0,2037 | 0,0106  |
| TcCLB.508169.50  | hypothetical protein, conserved                                | -0,2037 | 0,1532  |
| TcCLB.505943.10  | hypothetical protein, conserved                                | -0,2037 | 0,362   |
| TcCLB.510747.100 | hypothetical protein, conserved                                | -0,2038 | 0,1604  |
| TcCLB.506445.80  | hypothetical protein, conserved                                | -0,2038 | 0,1842  |
| TcCLB.508539.30  | hypothetical protein, conserved                                | -0,2038 | 0,2317  |
| TcCLB.509539.30  | fatty acid elongase, putative                                  | -0,2038 | 0,3851  |
| TcCLB.504001.10  | hypothetical protein, conserved                                | -0,2039 | 0,03102 |
| TcCLB.508207.250 | mitotic cyclin, putative                                       | -0,2039 | 0,2566  |
| TcCLB.506393.40  | trans-sialidase (pseudogene), putative                         | -0,2039 | 0,7294  |
| TcCLB.510877.50  | AP-3 complex subunit mu, putative (AP3M)                       | -0,204  | 0,06792 |
| TcCLB.511435.30  | MORN repeat-containing protein                                 | -0,204  | 0,06913 |
| TcCLB.509607.60  | hypothetical protein                                           | -0,2041 | 0,0753  |
| TcCLB.509755.60  | hypothetical protein, conserved (pseudogene)                   | -0,2041 | 0,6092  |
| TcCLB.511429.30  | conserved protein, unknown function                            | -0,2042 | 0,04619 |
| TcCLB.507639.40  | proteasome subunit beta type-5, putative                       | -0,2042 | 0,05746 |

|                  |                                                              |         |         |
|------------------|--------------------------------------------------------------|---------|---------|
| TcCLB.510063.10  | sigma-adaptin 3, putative                                    | -0,2043 | 0,2852  |
| TcCLB.504717.20  | hypothetical protein, conserved                              | -0,2044 | 0,03744 |
| TcCLB.504827.170 | kinetoplastid kinetochore protein 2, putative (fragment) (kl | -0,2044 | 0,2289  |
| TcCLB.508593.90  | hypothetical protein, conserved                              | -0,2044 | 0,2563  |
| TcCLB.511507.100 | hypothetical protein, conserved                              | -0,2045 | 0,2825  |
| TcCLB.511365.4   | hypothetical protein, conserved (fragment)                   | -0,2045 | 0,3862  |
| TcCLB.508479.280 | hypothetical protein, conserved                              | -0,2046 | 0,1525  |
| TcCLB.507093.63  | RNA-binding protein, putative                                | -0,2046 | 0,1632  |
| TcCLB.508015.40  | hypothetical protein                                         | -0,2046 | 0,4611  |
| TcCLB.507787.150 | hypothetical protein, conserved                              | -0,2048 | 0,04573 |
| TcCLB.511229.9   | replication factor C, subunit 4, putative                    | -0,2048 | 0,3943  |
| TcCLB.506711.10  | cAMP response protein, putative (CARP4)                      | -0,2049 | 0,04077 |
| TcCLB.507031.29  | nucleosome assembly protein, putative                        | -0,2049 | 0,04739 |
| TcCLB.506479.74  | Quinonprotein alcohol dehydrogenase-like protein, putative   | -0,2049 | 0,1328  |
| TcCLB.510307.330 | dispersed gene family protein 1 (DGF-1), putative            | -0,2049 | 0,2018  |
| TcCLB.507021.100 | hypothetical protein, conserved                              | -0,205  | 0,1058  |
| TcCLB.508073.20  | hypothetical protein                                         | -0,205  | 0,2218  |
| TcCLB.510271.20  | dispersed gene family protein 1 (DGF-1, pseudogene), puta    | -0,205  | 0,3947  |
| TcCLB.503865.80  | phosphatidylinositol 4-kinase, putative                      | -0,2051 | 0,2193  |
| TcCLB.508273.91  | hypothetical protein, conserved                              | -0,2051 | 0,5462  |
| TcCLB.507071.210 | mucin TcMUCII, putative                                      | -0,2051 | 0,759   |
| TcCLB.503599.30  | hypothetical protein, conserved                              | -0,2052 | 0,2446  |
| TcCLB.506661.160 | hypothetical protein, conserved                              | -0,2052 | 0,5368  |
| TcCLB.504427.190 | hypothetical protein, conserved                              | -0,2053 | 0,1914  |
| TcCLB.506835.150 | zinc-binding protein (Yippee), putative                      | -0,2053 | 0,3209  |
| TcCLB.419417.10  | hypothetical protein, conserved                              | -0,2053 | 0,5585  |
| TcCLB.507197.20  | oxidoreductase-like protein, putative                        | -0,2054 | 0,0944  |
| TcCLB.509643.70  | Archaic translocase of outer membrane 11 kDa subunit, pu     | -0,2055 | 0,1335  |
| TcCLB.506567.140 | hypothetical protein, conserved                              | -0,2055 | 0,4007  |
| TcCLB.511473.3   | hypothetical protein, conserved (pseudogene)                 | -0,2056 | 0,3742  |
| TcCLB.511521.30  | superoxide dismutase, putative                               | -0,2057 | 0,1138  |
| TcCLB.509231.30  | hypothetical protein                                         | -0,2057 | 0,3835  |
| TcCLB.506315.90  | serine/threonine protein kinase, putative                    | -0,2058 | 0,06524 |
| TcCLB.507723.120 | U1A small nuclear ribonucleoprotein, putative                | -0,2058 | 0,4108  |
| TcCLB.503981.20  | hypothetical protein, conserved                              | -0,2059 | 0,2759  |
| TcCLB.507951.290 | hypothetical protein, conserved                              | -0,2059 | 0,3486  |
| TcCLB.509053.10  | ubiquitin-protein ligase, putative                           | -0,206  | 0,1914  |
| TcCLB.510289.90  | hypothetical protein, conserved                              | -0,206  | 0,5193  |
| TcCLB.504029.80  | serine/threonine protein phosphatase, putative               | -0,2061 | 0,1286  |
| TcCLB.506879.109 | protein kinase, putative                                     | -0,2061 | 0,3611  |
| TcCLB.510279.220 | mucin TcMUC (pseudogene), putative                           | -0,2061 | 0,7219  |
| TcCLB.510611.20  | UDP-glucuronic acid/UDP-N-acetylgalactosamine transpor       | -0,2062 | 0,2595  |
| TcCLB.509229.140 | hypothetical protein, conserved                              | -0,2065 | 0,06153 |
| TcCLB.508881.80  | DNA ligase, putative                                         | -0,2065 | 0,2871  |
| TcCLB.511115.40  | transcription elongation factor s-II, putative               | -0,2066 | 0,08627 |

|                  |                                                        |         |          |
|------------------|--------------------------------------------------------|---------|----------|
| TcCLB.504765.9   | hypothetical protein, conserved (fragment)             | -0,2066 | 0,09774  |
| TcCLB.509179.60  | hypothetical protein, conserved                        | -0,2066 | 0,1908   |
| TcCLB.509925.70  | dispersed gene family protein 1 (DGF-1), putative      | -0,2066 | 0,3231   |
| TcCLB.506611.10  | mucin-associated surface protein (MASP), putative      | -0,2066 | 0,6892   |
| TcCLB.506319.5   | hypothetical protein, conserved (fragment)             | -0,2069 | 0,5716   |
| TcCLB.507029.41  | hypothetical protein                                   | -0,207  | 0,527    |
| TcCLB.508357.30  | hypothetical protein, conserved                        | -0,2071 | 0,1916   |
| TcCLB.510393.10  | hypothetical protein, conserved                        | -0,2071 | 0,2585   |
| TcCLB.508831.4   | dynein heavy chain, putative                           | -0,2072 | 0,09252  |
| TcCLB.511859.100 | trans-sialidase (pseudogene), putative                 | -0,2073 | 0,1929   |
| TcCLB.506363.100 | hypothetical protein, conserved                        | -0,2075 | 0,1033   |
| TcCLB.507519.70  | hypothetical protein, conserved                        | -0,2075 | 0,1289   |
| TcCLB.510451.10  | trans-sialidase (pseudogene), putative                 | -0,2075 | 0,7557   |
| TcCLB.507997.89  | hypothetical protein, conserved                        | -0,2076 | 0,4821   |
| TcCLB.510359.240 | hypothetical protein, conserved                        | -0,2078 | 0,1843   |
| TcCLB.503493.30  | hypothetical protein, conserved                        | -0,2079 | 0,2278   |
| TcCLB.506945.100 | hypothetical protein, conserved                        | -0,2081 | 0,06246  |
| TcCLB.506465.30  | hypothetical protein, conserved                        | -0,2082 | 0,07802  |
| TcCLB.506661.50  | hypothetical protein, conserved                        | -0,2084 | 0,06475  |
| TcCLB.510901.190 | hypothetical protein, conserved                        | -0,2086 | 0,1087   |
| TcCLB.511875.50  | syntaxin binding protein (pseudogene), putative        | -0,2086 | 0,1747   |
| TcCLB.506957.110 | SNF-7-like protein, putative                           | -0,2087 | 0,1264   |
| TcCLB.506755.240 | hypothetical protein, conserved                        | -0,2087 | 0,4988   |
| TcCLB.511859.170 | NADH-cytochrome b5 reductase, putative                 | -0,2088 | 0,09897  |
| TcCLB.510807.20  | hypothetical protein                                   | -0,2088 | 0,7254   |
| TcCLB.511409.10  | PAB1-binding protein , putative                        | -0,209  | 0,005413 |
| TcCLB.509027.60  | kinetoplastid kinetochore protein 10, putative (kkt10) | -0,209  | 0,2432   |
| TcCLB.506407.110 | hypothetical protein, conserved                        | -0,209  | 0,3524   |
| TcCLB.506999.20  | hypothetical protein, conserved                        | -0,2091 | 0,04713  |
| TcCLB.460747.20  | hypothetical protein, conserved                        | -0,2091 | 0,08624  |
| TcCLB.509455.20  | hypothetical protein, conserved                        | -0,2091 | 0,1101   |
| TcCLB.507265.30  | DNA polymerase delta catalytic subunit, putative       | -0,2091 | 0,258    |
| TcCLB.506207.10  | hypothetical protein, conserved                        | -0,2091 | 0,2979   |
| TcCLB.510435.40  | GPI transamidase component Tta1, putative (TTA1)       | -0,2092 | 0,2134   |
| TcCLB.504157.80  | hypothetical protein, conserved                        | -0,2093 | 0,06759  |
| TcCLB.510359.180 | hypothetical protein, conserved                        | -0,2093 | 0,1973   |
| TcCLB.507937.40  | elongation factor 1-gamma (EF-1-gamma), putative       | -0,2093 | 0,7303   |
| TcCLB.509453.10  | hypothetical protein, conserved                        | -0,2094 | 0,1104   |
| TcCLB.507583.10  | hypothetical protein, conserved                        | -0,2094 | 0,5417   |
| TcCLB.509171.40  | hypothetical protein, conserved                        | -0,2095 | 0,05346  |
| TcCLB.508731.20  | hypothetical protein, conserved                        | -0,2096 | 0,1756   |
| TcCLB.509023.200 | cdc2-related kinase 12 (CRK12)                         | -0,2097 | 0,06472  |
| TcCLB.510911.30  | Ras-related protein Rab4, putative (RAB4)              | -0,2097 | 0,09568  |
| TcCLB.507641.90  | hypothetical protein, conserved                        | -0,2097 | 0,2118   |
| TcCLB.508293.140 | mucin-associated surface protein (MASP), putative      | -0,2098 | 0,7762   |

|                  |                                                     |         |         |
|------------------|-----------------------------------------------------|---------|---------|
| TcCLB.511367.280 | hypothetical protein, conserved                     | -0,21   | 0,1155  |
| TcCLB.506147.20  | hypothetical protein                                | -0,21   | 0,3776  |
| TcCLB.510553.11  | hypothetical protein, conserved (pseudogene)        | -0,21   | 0,6039  |
| TcCLB.509799.20  | hypothetical protein, conserved                     | -0,2101 | 0,1206  |
| TcCLB.420719.9   | Associated kinase of Tb14-3-3, putative (AKB1)      | -0,2101 | 0,2246  |
| TcCLB.510995.9   | dispersed gene family protein 1 (DGF-1), putative   | -0,2101 | 0,5113  |
| TcCLB.510121.80  | hypothetical protein, conserved                     | -0,2102 | 0,06303 |
| TcCLB.506629.150 | hypothetical protein, conserved                     | -0,2102 | 0,155   |
| TcCLB.509965.10  | hypothetical protein, conserved (pseudogene)        | -0,2103 | 0,1985  |
| TcCLB.506495.3   | hypothetical protein, conserved                     | -0,2103 | 0,427   |
| TcCLB.506543.20  | hypothetical protein, conserved                     | -0,2104 | 0,03855 |
| TcCLB.508153.620 | hypothetical protein, conserved                     | -0,2104 | 0,203   |
| TcCLB.510599.14  | acetyl-CoA carboxylase (fragment)                   | -0,2105 | 0,02268 |
| TcCLB.508185.19  | ubiquitin hydrolase, putative (fragment)            | -0,2105 | 0,6035  |
| TcCLB.508873.450 | mucin-associated surface protein (MASP), putative   | -0,2105 | 0,665   |
| TcCLB.507257.180 | hypothetical protein                                | -0,2106 | 0,07307 |
| TcCLB.503407.20  | SUMO1/Ulp2, putative                                | -0,2106 | 0,1246  |
| TcCLB.510763.80  | DNA polymerase epsilon subunit B, putative          | -0,2106 | 0,1748  |
| TcCLB.511483.30  | hypothetical protein, conserved                     | -0,2106 | 0,176   |
| TcCLB.511585.150 | Meckel syndrome type 6 protein, putative (mks6)     | -0,2107 | 0,03459 |
| TcCLB.508325.300 | hypothetical protein, conserved                     | -0,2107 | 0,406   |
| TcCLB.510275.260 | trans-sialidase (pseudogene), putative              | -0,2107 | 0,5753  |
| TcCLB.508015.10  | hypothetical protein                                | -0,2108 | 0,4051  |
| TcCLB.504055.10  | hypothetical protein, conserved                     | -0,2109 | 0,2596  |
| TcCLB.506529.130 | WD repeat and HMG-box DNA-binding protein, putative | -0,2111 | 0,03585 |
| TcCLB.507013.10  | dolichol kinase, putative                           | -0,2111 | 0,119   |
| TcCLB.505183.5   | hypothetical protein, conserved (fragment)          | -0,2111 | 0,2277  |
| TcCLB.507001.50  | hypothetical protein, conserved                     | -0,2112 | 0,05711 |
| TcCLB.510287.20  | dolicholphosphate-mannose synthase, putative        | -0,2113 | 0,2037  |
| TcCLB.510363.310 | trans-sialidase (pseudogene), putative              | -0,2113 | 0,6075  |
| TcCLB.510555.21  | hypothetical protein                                | -0,2114 | 0,6486  |
| TcCLB.506867.20  | vacuolar type h ATPase subunit, putative            | -0,2115 | 0,102   |
| TcCLB.481729.20  | hypothetical protein, conserved                     | -0,2115 | 0,5097  |
| TcCLB.506857.70  | hypothetical protein, conserved                     | -0,2117 | 0,09621 |
| TcCLB.509053.150 | hypothetical protein, conserved                     | -0,2117 | 0,3179  |
| TcCLB.507023.289 | hypothetical protein, conserved (fragment)          | -0,2117 | 0,3634  |
| TcCLB.507681.120 | hypothetical protein, conserved (pseudogene)        | -0,2118 | 0,2192  |
| TcCLB.506133.179 | hypothetical protein                                | -0,2118 | 0,5512  |
| TcCLB.510351.150 | phosphoprotein phosphatase, putative                | -0,2119 | 0,2852  |
| TcCLB.469113.10  | trans-sialidase (pseudogene), putative              | -0,2119 | 0,4091  |
| TcCLB.510269.50  | mucin-associated surface protein (MASP), putative   | -0,2119 | 0,4596  |
| TcCLB.511911.110 | RNA helicase, putative                              | -0,2122 | 0,07895 |
| TcCLB.511517.150 | hypothetical protein, conserved                     | -0,2122 | 0,2447  |
| TcCLB.508817.170 | hypothetical protein, conserved                     | -0,2122 | 0,2527  |
| TcCLB.511315.44  | hypothetical protein, conserved (pseudogene)        | -0,2123 | 0,4071  |

|                  |                                                            |         |          |
|------------------|------------------------------------------------------------|---------|----------|
| TcCLB.506227.100 | hypothetical protein, conserved                            | -0,2124 | 0,4008   |
| TcCLB.511303.60  | translation initiation factor, putative                    | -0,2126 | 0,004815 |
| TcCLB.511277.280 | hypothetical protein, conserved                            | -0,2126 | 0,04575  |
| TcCLB.510305.30  | lipin, putative                                            | -0,2126 | 0,04808  |
| TcCLB.504013.110 | serine/threonine-protein phosphatase 2A, catalytic subunit | -0,2127 | 0,2014   |
| TcCLB.511019.108 | hypothetical protein, conserved                            | -0,2128 | 0,2193   |
| TcCLB.506681.70  | serine-threonine dehydratase, putative                     | -0,2128 | 0,2897   |
| TcCLB.508543.120 | hypothetical protein, conserved                            | -0,2128 | 0,3198   |
| TcCLB.510725.60  | hypothetical protein, conserved                            | -0,2128 | 0,3926   |
| TcCLB.511529.240 | hypothetical protein, conserved                            | -0,2129 | 0,04609  |
| TcCLB.509429.250 | ubiquitin hydrolase, putative                              | -0,2129 | 0,04706  |
| TcCLB.508461.190 | hypothetical protein, conserved                            | -0,2129 | 0,04834  |
| TcCLB.510531.30  | hypothetical protein, conserved                            | -0,213  | 0,05844  |
| TcCLB.506407.40  | hypothetical protein, conserved                            | -0,213  | 0,07059  |
| TcCLB.508409.270 | RNA-binding protein, putative                              | -0,213  | 0,08369  |
| TcCLB.503697.50  | hypothetical protein, conserved                            | -0,2131 | 0,0329   |
| TcCLB.503823.30  | hypothetical protein, conserved                            | -0,2132 | 0,1671   |
| TcCLB.508827.120 | hypothetical protein, conserved                            | -0,2132 | 0,1742   |
| TcCLB.504443.10  | cysteine peptidase, Clan CA, family C19, putative          | -0,2134 | 0,08254  |
| TcCLB.509641.60  | hypothetical protein, conserved                            | -0,2135 | 0,2043   |
| TcCLB.511589.150 | hypothetical protein, conserved                            | -0,2135 | 0,27     |
| TcCLB.506559.430 | TPR-repeat protein, putative                               | -0,2137 | 0,01764  |
| TcCLB.511277.460 | hypothetical protein, conserved                            | -0,2137 | 0,1324   |
| TcCLB.510777.20  | aspartyl-tRNA synthetase, putative                         | -0,2138 | 0,02451  |
| TcCLB.511365.70  | proteasome regulatory non-ATP-ase subunit 9, putative (R)  | -0,2138 | 0,05951  |
| TcCLB.507773.30  | RNA editing complex protein MP46, putative                 | -0,2138 | 0,171    |
| TcCLB.510655.150 | hypothetical protein, conserved                            | -0,2138 | 0,1938   |
| TcCLB.503757.40  | Casein kinase II subunit beta, putative                    | -0,2139 | 0,1535   |
| TcCLB.509859.90  | NAD-dependent deacetylase, putative (fragment)             | -0,2139 | 0,5766   |
| TcCLB.503909.50  | hypothetical protein, conserved (YCF45)                    | -0,214  | 0,1056   |
| TcCLB.503823.110 | hypothetical protein, conserved                            | -0,214  | 0,2292   |
| TcCLB.507259.10  | tryparedoxin peroxidase, putative                          | -0,2141 | 0,01435  |
| TcCLB.508781.30  | hypothetical protein, conserved                            | -0,2141 | 0,09389  |
| TcCLB.511467.60  | hypothetical protein, conserved                            | -0,2141 | 0,1339   |
| TcCLB.507105.30  | hypothetical protein, conserved                            | -0,2142 | 0,08891  |
| TcCLB.509123.5   | trans-sialidase (pseudogene), putative                     | -0,2142 | 0,8175   |
| TcCLB.511511.10  | endosomal trafficking protein RME-8, putative              | -0,2143 | 0,03183  |
| TcCLB.509353.40  | PTP1-interacting protein, 39 kDa, putative                 | -0,2143 | 0,07776  |
| TcCLB.503923.30  | hypothetical protein, conserved                            | -0,2143 | 0,1673   |
| TcCLB.511287.60  | hypothetical protein, conserved                            | -0,2144 | 0,01547  |
| TcCLB.507895.124 | hypothetical protein, conserved                            | -0,2146 | 0,008073 |
| TcCLB.509261.30  | 3,2-trans-enoyl-CoA isomerase, mitochondrial precursor, p  | -0,2146 | 0,02573  |
| TcCLB.507047.100 | hypothetical protein, conserved                            | -0,2146 | 0,08133  |
| TcCLB.511625.120 | hypothetical protein                                       | -0,2147 | 0,6839   |
| TcCLB.511191.10  | tyrosyl-DNA Phosphodiesterase (Tdp1), putative             | -0,2148 | 0,2134   |

|                  |                                                          |         |          |
|------------------|----------------------------------------------------------|---------|----------|
| TcCLB.506265.209 | hypothetical protein, conserved (fragment)               | -0,2148 | 0,6138   |
| TcCLB.503781.50  | hypothetical protein, conserved                          | -0,2149 | 0,1164   |
| TcCLB.508699.110 | elongation factor G2-like protein, putative              | -0,2149 | 0,3044   |
| TcCLB.508181.4   | AGC/RSK family serine/threonine kinase, putative (fragme | -0,2149 | 0,5656   |
| TcCLB.463297.10  | hypothetical protein (fragment)                          | -0,2149 | 0,571    |
| TcCLB.510439.61  | heat shock 70 kDa protein, putative (fragment)           | -0,2152 | 0,01894  |
| TcCLB.506937.40  | dynein heavy chain, putative                             | -0,2153 | 0,04906  |
| TcCLB.511925.50  | hypothetical protein, conserved                          | -0,2154 | 0,141    |
| TcCLB.509063.20  | hypothetical protein, conserved                          | -0,2154 | 0,1818   |
| TcCLB.506855.260 | thymidine kinase, putative                               | -0,2154 | 0,2271   |
| TcCLB.510021.185 | hypothetical protein                                     | -0,2155 | 0,6962   |
| TcCLB.511727.230 | Repressor of differentiation kinase 1, putative (RDK1.2) | -0,2156 | 0,03304  |
| TcCLB.508521.90  | trans-sialidase (pseudogene), putative                   | -0,2156 | 0,3305   |
| TcCLB.509547.40  | mucin-associated surface protein (MASP), putative        | -0,2156 | 0,6494   |
| TcCLB.508641.260 | DNA-directed RNA polymerase, mitochondrial (MTRNAP)      | -0,2157 | 0,01125  |
| TcCLB.511801.30  | hypothetical protein, conserved                          | -0,2157 | 0,1412   |
| TcCLB.510767.40  | hypothetical protein, conserved                          | -0,2157 | 0,1877   |
| TcCLB.507699.230 | trans-sialidase, putative                                | -0,2157 | 0,4668   |
| TcCLB.506147.70  | hypothetical protein, conserved                          | -0,2158 | 0,1335   |
| TcCLB.508625.70  | mRNA capping methyltransferase, putative                 | -0,2158 | 0,2743   |
| TcCLB.510285.20  | hypothetical protein, conserved                          | -0,2161 | 0,03971  |
| TcCLB.509647.90  | chloride channel protein, putative                       | -0,2161 | 0,06301  |
| TcCLB.506533.70  | hypothetical protein, conserved                          | -0,2161 | 0,1431   |
| TcCLB.504179.20  | hypothetical protein, conserved                          | -0,2161 | 0,2403   |
| TcCLB.508827.100 | splicing factor 3B subunit 1, putative                   | -0,2163 | 0,0109   |
| TcCLB.510491.30  | hypothetical protein, conserved (pseudogene)             | -0,2164 | 0,2035   |
| TcCLB.508859.80  | hypothetical protein, conserved                          | -0,2164 | 0,2065   |
| TcCLB.503525.50  | RNA helicase, putative                                   | -0,2164 | 0,2381   |
| TcCLB.511643.40  | trans-sialidase, Group V, putative                       | -0,2164 | 0,3597   |
| TcCLB.464879.9   | ribonuclease L inhibitor, putative (fragment)            | -0,2166 | 0,222    |
| TcCLB.510131.90  | hypothetical protein, conserved                          | -0,2167 | 0,07877  |
| TcCLB.503877.10  | hypothetical protein, conserved                          | -0,2167 | 0,232    |
| TcCLB.504625.60  | hydrogenase, putative                                    | -0,2168 | 0,129    |
| TcCLB.508613.50  | hypothetical protein, conserved                          | -0,2169 | 0,02495  |
| TcCLB.510663.80  | hypothetical protein, conserved                          | -0,2169 | 0,1601   |
| TcCLB.508817.70  | DNA repair protein RAD50, putative                       | -0,217  | 0,003042 |
| TcCLB.509617.50  | hypothetical protein, conserved                          | -0,2171 | 0,1192   |
| TcCLB.511499.40  | hypothetical protein, conserved                          | -0,2171 | 0,2945   |
| TcCLB.508899.70  | hypothetical protein, conserved                          | -0,2172 | 0,1709   |
| TcCLB.507771.40  | phosphoglycerate mutase, putative (iPGAM)                | -0,2173 | 0,2026   |
| TcCLB.508153.200 | kinesin, putative                                        | -0,2174 | 0,09389  |
| TcCLB.506505.50  | hypothetical protein, conserved                          | -0,2175 | 0,04847  |
| TcCLB.509033.80  | hypothetical protein, conserved                          | -0,2175 | 0,06011  |
| TcCLB.506661.120 | hypothetical protein                                     | -0,2175 | 0,1813   |
| TcCLB.505155.4   | trans-sialidase, putative (fragment)                     | -0,2175 | 0,6908   |

|                  |                                                           |         |          |
|------------------|-----------------------------------------------------------|---------|----------|
| TcCLB.510901.220 | hypothetical protein, conserved                           | -0,2176 | 0,08882  |
| TcCLB.508637.79  | DNA polymerase eta, putative                              | -0,2176 | 0,1287   |
| TcCLB.506459.10  | mucin-associated surface protein (MASP), putative         | -0,2176 | 0,478    |
| TcCLB.508547.100 | hypothetical protein, conserved                           | -0,2177 | 0,1234   |
| TcCLB.511771.156 | retrotransposon hot spot protein (RHS, pseudogene), putat | -0,2177 | 0,1989   |
| TcCLB.511365.100 | hypothetical protein, conserved                           | -0,2177 | 0,2585   |
| TcCLB.506603.46  | hypothetical protein, conserved (pseudogene)              | -0,2177 | 0,6936   |
| TcCLB.506399.40  | hypothetical protein, conserved                           | -0,2178 | 0,4112   |
| TcCLB.503667.31  | retrotransposon hot spot protein (RHS, pseudogene), putat | -0,2179 | 0,54     |
| TcCLB.511499.10  | hypothetical protein, conserved                           | -0,218  | 0,06209  |
| TcCLB.507641.160 | hypothetical protein, conserved                           | -0,2181 | 0,008112 |
| TcCLB.510901.210 | hypothetical protein, conserved                           | -0,2182 | 0,05187  |
| TcCLB.506289.74  | chaperone DNAJ protein, putative                          | -0,2182 | 0,1489   |
| TcCLB.506315.100 | protein phosphatase 2C, putative                          | -0,2183 | 0,06832  |
| TcCLB.506469.20  | hypothetical protein                                      | -0,2183 | 0,09638  |
| TcCLB.504131.160 | hypothetical protein                                      | -0,2184 | 0,152    |
| TcCLB.508257.50  | actin-like protein, putative                              | -0,2184 | 0,245    |
| TcCLB.504037.20  | hypothetical protein, conserved                           | -0,2186 | 0,07063  |
| TcCLB.506891.20  | wd40 repeat domain-containing protein                     | -0,2186 | 0,1643   |
| TcCLB.510877.10  | antigenic protein, putative                               | -0,2187 | 0,1405   |
| TcCLB.511713.40  | ribosome biogenesis protein TSR3, putative (tsr3)         | -0,2187 | 0,2039   |
| TcCLB.507061.30  | iron superoxide dismutase, putative                       | -0,2187 | 0,2072   |
| TcCLB.507835.70  | dispersed gene family protein 1 (DGF-1), putative         | -0,2187 | 0,2989   |
| TcCLB.507093.240 | hypothetical protein, conserved                           | -0,2188 | 0,02579  |
| TcCLB.445553.10  | hypothetical protein, conserved                           | -0,2188 | 0,1322   |
| TcCLB.506701.20  | Tob55, putative                                           | -0,219  | 0,139    |
| TcCLB.510737.90  | hypothetical protein, conserved                           | -0,2191 | 0,2738   |
| TcCLB.511153.50  | haloacid dehalogenase hydrolase, putative                 | -0,2192 | 0,1999   |
| TcCLB.503983.20  | dihydroxyacetone kinase 1-like, putative                  | -0,2193 | 0,1004   |
| TcCLB.510291.30  | protein phosphatase 2C-like, putative                     | -0,2194 | 0,1869   |
| TcCLB.506943.114 | U6 snRNA-associated Sm-like protein LSm5p                 | -0,2194 | 0,3174   |
| TcCLB.511089.80  | trans-sialidase, Group V, putative                        | -0,2194 | 0,5938   |
| TcCLB.511127.369 | hypothetical protein, conserved                           | -0,2195 | 0,1355   |
| TcCLB.503925.50  | hypothetical protein, conserved                           | -0,2195 | 0,1951   |
| TcCLB.506821.110 | hypothetical protein, conserved                           | -0,2195 | 0,2285   |
| TcCLB.439301.9   | hypothetical protein, conserved                           | -0,2197 | 0,06707  |
| TcCLB.509105.60  | adenosine deaminase-like protein, putative (ADAT1h)       | -0,2198 | 0,1502   |
| TcCLB.511279.30  | ARF-like 2-binding protein, putative                      | -0,2198 | 0,2816   |
| TcCLB.511469.24  | ADP-ribosylation factor-like 2, arl2, putative (ARL2)     | -0,2198 | 0,4441   |
| TcCLB.507677.120 | hypothetical protein, conserved                           | -0,22   | 0,07214  |
| TcCLB.511855.70  | protein kinase, putative                                  | -0,22   | 0,07922  |
| TcCLB.506801.100 | hypothetical protein, conserved                           | -0,2201 | 0,143    |
| TcCLB.511071.181 | hypothetical protein, conserved                           | -0,2202 | 0,08363  |
| TcCLB.510743.80  | hypothetical protein, conserved                           | -0,2202 | 0,1315   |
| TcCLB.510729.130 | DNA replication licensing factor MCM9, putative           | -0,2203 | 0,06747  |

|                  |                                                               |         |          |
|------------------|---------------------------------------------------------------|---------|----------|
| TcCLB.510167.29  | exosome complex exonuclease, putative                         | -0,2203 | 0,1933   |
| TcCLB.506699.3   | hypothetical protein, conserved                               | -0,2203 | 0,2434   |
| TcCLB.510691.30  | hypothetical protein, conserved                               | -0,2206 | 0,09617  |
| TcCLB.508409.140 | hypothetical protein, conserved                               | -0,2207 | 0,1524   |
| TcCLB.511281.40  | mevalonate-diphosphate decarboxylase, putative                | -0,2208 | 0,07008  |
| TcCLB.508209.70  | hypothetical protein, conserved                               | -0,2208 | 0,1443   |
| TcCLB.507167.41  | ATP-dependent DEAD/H RNA helicase (pseudogene), putative      | -0,2209 | 0,6974   |
| TcCLB.504827.60  | hypothetical protein, conserved                               | -0,221  | 0,07438  |
| TcCLB.506631.20  | cardiolipin synthetase, putative (cls)                        | -0,2211 | 0,07935  |
| TcCLB.508169.80  | hypothetical protein, conserved                               | -0,2212 | 0,2325   |
| TcCLB.506963.100 | hypothetical protein, conserved                               | -0,2213 | 0,2818   |
| TcCLB.508261.25  | trans-sialidase (pseudogene), putative                        | -0,2214 | 0,06079  |
| TcCLB.506517.130 | hypothetical protein, conserved                               | -0,2214 | 0,08282  |
| TcCLB.506885.200 | hypothetical protein, conserved                               | -0,2215 | 0,007361 |
| TcCLB.508899.20  | hypothetical protein, conserved                               | -0,2215 | 0,02582  |
| TcCLB.507711.349 | hypothetical protein, conserved                               | -0,2215 | 0,3844   |
| TcCLB.503697.90  | Translation factor GUF1, mitochondrial, putative (GUF1)       | -0,2216 | 0,03812  |
| TcCLB.506255.10  | hypothetical protein, conserved (pseudogene)                  | -0,2216 | 0,3844   |
| TcCLB.503809.20  | peroxin 12, putative (PEX12)                                  | -0,2217 | 0,1299   |
| TcCLB.511717.120 | hypothetical protein, conserved                               | -0,2218 | 0,1113   |
| TcCLB.510181.120 | hypothetical protein, conserved                               | -0,2218 | 0,1276   |
| TcCLB.507769.10  | hypothetical protein, conserved                               | -0,2218 | 0,5243   |
| TcCLB.507073.10  | hypothetical protein, conserved                               | -0,2219 | 0,07259  |
| TcCLB.511319.10  | hypothetical protein, conserved                               | -0,222  | 0,03129  |
| TcCLB.510525.10  | protein kinase, putative                                      | -0,2221 | 0,1628   |
| TcCLB.508027.40  | folate/pteridine transporter, putative                        | -0,2222 | 0,02239  |
| TcCLB.511589.90  | hypothetical protein, conserved                               | -0,2222 | 0,09869  |
| TcCLB.510407.100 | hypothetical protein, conserved                               | -0,2222 | 0,1187   |
| TcCLB.511903.290 | hypothetical protein, conserved                               | -0,2224 | 0,01696  |
| TcCLB.510463.259 | mucin-associated surface protein (MASP), putative (fragm)     | -0,2224 | 0,6112   |
| TcCLB.509965.340 | hypothetical protein, conserved                               | -0,2225 | 0,06745  |
| TcCLB.504115.5   | trans-sialidase (pseudogene), putative                        | -0,2226 | 0,2344   |
| TcCLB.507023.220 | hypothetical protein, conserved                               | -0,2227 | 0,01749  |
| TcCLB.504179.30  | hypothetical protein, conserved                               | -0,2228 | 0,1937   |
| TcCLB.510639.10  | dispersed gene family protein 1 (DGF-1, pseudogene), putative | -0,2228 | 0,3441   |
| TcCLB.511627.80  | hypothetical protein, conserved                               | -0,2229 | 0,3306   |
| TcCLB.504093.4   | hypothetical protein, conserved                               | -0,2229 | 0,3348   |
| TcCLB.503431.20  | hypothetical protein, conserved                               | -0,223  | 0,216    |
| TcCLB.506789.270 | hypothetical protein, conserved                               | -0,2231 | 0,04368  |
| TcCLB.509395.70  | hypothetical protein, conserved                               | -0,2232 | 0,06981  |
| TcCLB.510731.50  | small nuclear RNA gene activation protein (SNAP) 50, putative | -0,2233 | 0,05494  |
| TcCLB.504057.45  | hypothetical protein, conserved                               | -0,2233 | 0,0849   |
| TcCLB.504147.130 | hypothetical protein, conserved                               | -0,2234 | 0,09521  |
| TcCLB.508027.94  | hypothetical protein, conserved                               | -0,2234 | 0,156    |
| TcCLB.509317.80  | succinate dehydrogenase subunit                               | -0,2236 | 0,09393  |



|                  |                                                           |         |         |
|------------------|-----------------------------------------------------------|---------|---------|
| TcCLB.508461.143 | hypothetical protein, conserved                           | -0,2238 | 0,3176  |
| TcCLB.511873.10  | trans-sialidase, Group V, putative                        | -0,2238 | 0,3586  |
| TcCLB.508787.10  | hypothetical protein, conserved                           | -0,2239 | 0,1692  |
| TcCLB.508511.10  | mucin-associated surface protein (MASP, pseudogene), pu   | -0,2239 | 0,6938  |
| TcCLB.503559.80  | hypothetical protein                                      | -0,224  | 0,09162 |
| TcCLB.507519.160 | hypothetical protein, conserved                           | -0,2241 | 0,1892  |
| TcCLB.511731.24  | hypothetical protein                                      | -0,2242 | 0,08998 |
| TcCLB.508369.50  | acetyl-CoA carboxylase (fragment)                         | -0,2243 | 0,01403 |
| TcCLB.511283.30  | hypothetical protein, conserved                           | -0,2243 | 0,05115 |
| TcCLB.504077.40  | translation elongation factor EF-2, putative              | -0,2243 | 0,06918 |
| TcCLB.510301.40  | hypothetical protein, conserved                           | -0,2243 | 0,1183  |
| TcCLB.509099.150 | cdc2-related kinase 9 (CRK9)                              | -0,2245 | 0,05727 |
| TcCLB.506945.170 | thiosulfate sulfurtransferase, mitochondrial, putative    | -0,2246 | 0,176   |
| TcCLB.506467.14  | hypothetical protein, conserved                           | -0,2246 | 0,2351  |
| TcCLB.510387.60  | trans-sialidase (pseudogene), putative                    | -0,2247 | 0,3814  |
| TcCLB.511283.109 | AP-4 complex subunit sigma-1, putative                    | -0,2249 | 0,2197  |
| TcCLB.507959.300 | mucin-associated surface protein (MASP), putative         | -0,2249 | 0,4992  |
| TcCLB.511883.30  | dispersed gene family protein 1 (DGF-1, pseudogene), puta | -0,225  | 0,2746  |
| TcCLB.504057.170 | protein kinase, putative                                  | -0,2251 | 0,0779  |
| TcCLB.508827.20  | hypothetical protein, conserved                           | -0,2251 | 0,1565  |
| TcCLB.511257.90  | mucin-associated surface protein (MASP), putative         | -0,2251 | 0,4781  |
| TcCLB.511475.50  | dispersed gene family protein 1 (DGF-1), putative         | -0,2254 | 0,3128  |
| TcCLB.509525.60  | mucin TcMUCII, putative                                   | -0,2254 | 0,76    |
| TcCLB.507793.10  | hypothetical protein, conserved                           | -0,2256 | 0,01598 |
| TcCLB.509247.10  | hypothetical protein, conserved                           | -0,2256 | 0,1444  |
| TcCLB.511183.260 | mucin-associated surface protein (MASP), putative         | -0,2256 | 0,5816  |
| TcCLB.509017.40  | hypothetical protein, conserved                           | -0,2257 | 0,08746 |
| TcCLB.506909.100 | trans-sialidase, Group V, putative                        | -0,2257 | 0,5064  |
| TcCLB.510243.70  | hypothetical protein, conserved                           | -0,2259 | 0,03019 |
| TcCLB.504129.10  | hypothetical protein, conserved                           | -0,2259 | 0,4364  |
| TcCLB.511901.20  | hypothetical protein, conserved                           | -0,226  | 0,03212 |
| TcCLB.503869.50  | exosome-associated protein 1, putative (EAP1)             | -0,226  | 0,07309 |
| TcCLB.503575.54  | hypothetical protein, conserved                           | -0,226  | 0,1405  |
| TcCLB.511725.100 | phosphatidylinositol-4-phosphate 5-kinase, putative       | -0,2261 | 0,04178 |
| TcCLB.506531.20  | hypothetical protein, conserved                           | -0,2261 | 0,06244 |
| TcCLB.509471.68  | histone H3, putative                                      | -0,2263 | 0,02327 |
| TcCLB.509287.250 | retrotransposon hot spot protein (RHS, pseudogene), putat | -0,2263 | 0,1277  |
| TcCLB.508881.60  | hypothetical protein, conserved                           | -0,2263 | 0,1402  |
| TcCLB.509399.140 | hypothetical protein, conserved                           | -0,2263 | 0,1475  |
| TcCLB.507599.10  | Ribosome biogenesis protein Tsr3, putative (fragment)     | -0,2263 | 0,4735  |
| TcCLB.504081.170 | mucin-associated surface protein (MASP), putative         | -0,2263 | 0,6202  |
| TcCLB.509693.40  | hypothetical protein, conserved                           | -0,2264 | 0,2373  |
| TcCLB.510487.20  | dispersed gene family protein 1 (DGF-1, pseudogene), puta | -0,2265 | 0,4138  |
| TcCLB.506787.9   | dispersed gene family protein 1 (DGF-1), putative (fragme | -0,2265 | 0,6707  |
| TcCLB.510091.14  | hypothetical protein, conserved                           | -0,2266 | 0,3424  |

|                  |                                                                     |         |         |
|------------------|---------------------------------------------------------------------|---------|---------|
| TcCLB.506811.170 | hypothetical protein, conserved                                     | -0,2269 | 0,03114 |
| TcCLB.510719.310 | hypothetical protein, conserved                                     | -0,2269 | 0,0396  |
| TcCLB.510007.70  | ATP-dependent zinc metallopeptidase, putative                       | -0,2269 | 0,08456 |
| TcCLB.510265.14  | hypothetical protein, conserved                                     | -0,2269 | 0,1452  |
| TcCLB.508273.60  | hypothetical protein, conserved                                     | -0,227  | 0,04172 |
| TcCLB.509965.360 | hypothetical protein, conserved                                     | -0,227  | 0,2205  |
| TcCLB.506147.170 | hypothetical protein, conserved                                     | -0,2271 | 0,02345 |
| TcCLB.511421.80  | Midasin, putative (pseudogene)                                      | -0,2272 | 0,02104 |
| TcCLB.507625.190 | hypothetical protein, conserved                                     | -0,2273 | 0,1017  |
| TcCLB.510945.40  | hypothetical protein, conserved                                     | -0,2274 | 0,04784 |
| TcCLB.504741.30  | protein phosphatase 2C, putative                                    | -0,2274 | 0,1552  |
| TcCLB.504071.100 | hypothetical protein, conserved                                     | -0,2275 | 0,02396 |
| TcCLB.504035.60  | hypothetical protein, conserved                                     | -0,2275 | 0,2183  |
| TcCLB.507939.30  | hypothetical protein, conserved                                     | -0,2276 | 0,1316  |
| TcCLB.511423.50  | conserved protein, unknown function                                 | -0,2277 | 0,05821 |
| TcCLB.511277.520 | protein kinase (pseudogene), putative                               | -0,2277 | 0,2168  |
| TcCLB.506635.44  | hypothetical protein, conserved                                     | -0,2277 | 0,2299  |
| TcCLB.511283.10  | nuclear segregation protein, putative                               | -0,2278 | 0,01005 |
| TcCLB.506857.60  | peptidyl-prolyl cis-trans isomerase, putative (PAR45)               | -0,2278 | 0,05329 |
| TcCLB.506953.40  | hypothetical protein, conserved                                     | -0,2278 | 0,08292 |
| TcCLB.504085.10  | hypothetical protein, conserved                                     | -0,2278 | 0,09911 |
| TcCLB.507039.41  | hypothetical protein, conserved                                     | -0,2278 | 0,297   |
| TcCLB.508871.150 | mucin-associated surface protein (MASP), putative                   | -0,2278 | 0,4397  |
| TcCLB.508965.50  | hypothetical protein, conserved                                     | -0,2279 | 0,04826 |
| TcCLB.509643.30  | hypothetical protein, conserved                                     | -0,2279 | 0,0578  |
| TcCLB.510029.50  | hypothetical protein, conserved                                     | -0,2279 | 0,1035  |
| TcCLB.507829.10  | cysteine peptidase, Clan CA, family C2, putative                    | -0,2279 | 0,1598  |
| TcCLB.508707.20  | As/Sb Reductase, putative (ACR2)                                    | -0,2279 | 0,2504  |
| TcCLB.511529.250 | hypothetical protein                                                | -0,228  | 0,09059 |
| TcCLB.510459.30  | dispersed gene family protein 1 (DGF-1), putative                   | -0,2282 | 0,5738  |
| TcCLB.503831.40  | mitochondrial DNA primase, putative                                 | -0,2283 | 0,0596  |
| TcCLB.511715.50  | hypothetical protein, conserved (pseudogene)                        | -0,2285 | 0,1645  |
| TcCLB.511311.60  | hypothetical protein, conserved                                     | -0,2285 | 0,2358  |
| TcCLB.506265.60  | hypothetical protein, conserved                                     | -0,2286 | 0,01612 |
| TcCLB.508153.40  | hypothetical protein, conserved                                     | -0,2286 | 0,2112  |
| TcCLB.511919.30  | hypothetical protein, conserved (pseudogene)                        | -0,2286 | 0,4863  |
| TcCLB.503755.54  | hypothetical protein, conserved                                     | -0,2287 | 0,08581 |
| TcCLB.511247.27  | RNA editing 3' terminal uridylyl transferase 1, putative            | -0,2287 | 0,1646  |
| TcCLB.508461.420 | 30S Ribosomal protein S17, putative                                 | -0,2288 | 0,07457 |
| TcCLB.506559.170 | 8-oxoguanine DNA glycosylase, putative                              | -0,2289 | 0,033   |
| TcCLB.509023.100 | catalytic subunit of the vacuolar transporter chaperone 4, $\gamma$ | -0,2292 | 0,06264 |
| TcCLB.509167.180 | kinesin, putative                                                   | -0,2294 | 0,03967 |
| TcCLB.509871.31  | ATP-dependent DEAD/H RNA helicase (pseudogene), putative            | -0,2294 | 0,5637  |
| TcCLB.507801.150 | hypothetical protein, conserved                                     | -0,2295 | 0,2781  |
| TcCLB.506941.9   | endosomal trafficking protein RME-8, putative                       | -0,2297 | 0,06748 |

|                  |                                                              |         |          |
|------------------|--------------------------------------------------------------|---------|----------|
| TcCLB.506193.10  | hypothetical protein, conserved                              | -0,2298 | 0,01833  |
| TcCLB.506755.200 | hypothetical protein, conserved                              | -0,2298 | 0,2085   |
| TcCLB.508409.30  | DNA-directed RNA polymerase II subunit 3, putative (RPB3     | -0,2299 | 0,03631  |
| TcCLB.508899.120 | hypothetical protein, conserved                              | -0,2299 | 0,3948   |
| TcCLB.506857.90  | proteasome regulatory ATPase subunit 1, putative             | -0,23   | 0,0222   |
| TcCLB.507897.4   | inositol polyphosphate 1-phosphatase, putative               | -0,23   | 0,08761  |
| TcCLB.508439.10  | hypothetical protein, conserved                              | -0,23   | 0,3567   |
| TcCLB.474937.9   | acetyl-CoA carboxylase, putative                             | -0,2304 | 0,04212  |
| TcCLB.510087.10  | hypothetical protein, conserved                              | -0,2304 | 0,1676   |
| TcCLB.511767.60  | trans-sialidase (pseudogene), putative                       | -0,2305 | 0,09286  |
| TcCLB.508799.20  | chromatin binding protein, putative                          | -0,2306 | 0,114    |
| TcCLB.507023.90  | hypothetical protein, conserved                              | -0,2307 | 0,06641  |
| TcCLB.510357.130 | hypothetical protein, conserved                              | -0,2307 | 0,1727   |
| TcCLB.509267.100 | methionyl-tRNA formyltransferase, putative                   | -0,2308 | 0,1275   |
| TcCLB.511503.9   | hypothetical protein, conserved (pseudogene)                 | -0,2308 | 0,1766   |
| TcCLB.511575.90  | hypothetical protein                                         | -0,2308 | 0,2164   |
| TcCLB.511151.70  | hypothetical protein, conserved                              | -0,2309 | 0,03291  |
| TcCLB.503525.20  | hypothetical protein, conserved                              | -0,2309 | 0,03358  |
| TcCLB.509063.30  | chaperonin HSP60/CNP60, putative                             | -0,2309 | 0,07686  |
| TcCLB.510241.120 | Peptide deformylase 2, putative (PDF2)                       | -0,2309 | 0,0916   |
| TcCLB.504027.4   | kinesin, putative (fragment)                                 | -0,2309 | 0,2095   |
| TcCLB.507031.40  | hypothetical protein, conserved                              | -0,231  | 0,07487  |
| TcCLB.506135.80  | hypothetical protein, conserved                              | -0,231  | 0,2498   |
| TcCLB.507603.30  | PITH domain-containing protein                               | -0,231  | 0,2551   |
| TcCLB.505983.20  | nucleosome assembly protein-like protein, putative           | -0,2311 | 0,004237 |
| TcCLB.506503.10  | hypothetical protein, conserved                              | -0,2311 | 0,1398   |
| TcCLB.509875.25  | trans-sialidase (pseudogene), putative                       | -0,2311 | 0,6412   |
| TcCLB.510253.20  | hypothetical protein, conserved                              | -0,2312 | 0,01725  |
| TcCLB.509999.80  | hypothetical protein, conserved                              | -0,2312 | 0,03951  |
| TcCLB.508323.30  | hypothetical protein, conserved                              | -0,2312 | 0,1136   |
| TcCLB.508411.90  | tfiih basal transcription factor complex helicase xpb subuni | -0,2313 | 0,0134   |
| TcCLB.506709.30  | hypothetical protein, conserved                              | -0,2313 | 0,08342  |
| TcCLB.504427.180 | hypothetical protein                                         | -0,2313 | 0,1797   |
| TcCLB.508815.170 | protein kinase, putative                                     | -0,2314 | 0,003004 |
| TcCLB.511277.70  | Elongation factor Tu, mitochondrial, putative (EF-Tu)        | -0,2314 | 0,01175  |
| TcCLB.507857.10  | transcription elongation factor, putative                    | -0,2314 | 0,1091   |
| TcCLB.504253.60  | hypothetical protein, conserved (fragment)                   | -0,2314 | 0,511    |
| TcCLB.503995.20  | hypothetical protein, conserved                              | -0,2315 | 0,1344   |
| TcCLB.504147.40  | Mitochondrial N(5)-glutamine methyltransferase MTQ1, pi      | -0,2316 | 0,02913  |
| TcCLB.504075.6   | dual specificity protein phosphatase, putative               | -0,2316 | 0,1087   |
| TcCLB.507721.10  | hypothetical protein, conserved                              | -0,2316 | 0,1766   |
| TcCLB.507823.20  | hypothetical protein                                         | -0,2317 | 0,08521  |
| TcCLB.507297.20  | cysteinyl-tRNA synthetase, putative                          | -0,2318 | 0,007053 |
| TcCLB.507011.200 | dihydroxyacetone kinase 1-like, putative                     | -0,2318 | 0,09148  |
| TcCLB.510377.70  | mucin TcMUCII, putative                                      | -0,2318 | 0,8399   |

|                  |                                                              |         |          |
|------------------|--------------------------------------------------------------|---------|----------|
| TcCLB.511301.140 | potassium voltage-gated channel                              | -0,2319 | 0,1116   |
| TcCLB.506173.140 | dispersed gene family protein 1 (DGF-1), putative            | -0,2319 | 0,2893   |
| TcCLB.503829.70  | hypothetical protein, conserved                              | -0,232  | 0,06088  |
| TcCLB.503809.130 | hypothetical protein, conserved                              | -0,232  | 0,1158   |
| TcCLB.507035.30  | dispersed gene family protein 1 (DGF-1), putative            | -0,2321 | 0,155    |
| TcCLB.506435.40  | hypothetical protein, conserved                              | -0,2321 | 0,272    |
| TcCLB.504137.70  | hypothetical protein, conserved                              | -0,2322 | 0,1123   |
| TcCLB.506999.130 | hypothetical protein, conserved                              | -0,2323 | 0,02151  |
| TcCLB.508779.80  | hypothetical protein, conserved                              | -0,2323 | 0,07078  |
| TcCLB.509917.6   | ATP-dependent DEAD/H RNA helicase (pseudogene), putative     | -0,2323 | 0,3503   |
| TcCLB.507167.140 | trans-sialidase (pseudogene), putative                       | -0,2323 | 0,527    |
| TcCLB.503805.10  | hypothetical protein, conserved                              | -0,2324 | 0,1535   |
| TcCLB.510491.20  | dynein light chain, putative                                 | -0,2324 | 0,2398   |
| TcCLB.508709.10  | hypothetical protein, conserved                              | -0,2325 | 0,2458   |
| TcCLB.504129.50  | hypothetical protein, conserved (pseudogene)                 | -0,2325 | 0,3617   |
| TcCLB.507485.60  | hypothetical protein, conserved                              | -0,2326 | 0,06042  |
| TcCLB.510609.80  | hypothetical protein, conserved                              | -0,2328 | 0,2544   |
| TcCLB.506895.10  | hypothetical protein, conserved                              | -0,233  | 0,1695   |
| TcCLB.507711.230 | hypothetical protein, conserved                              | -0,2332 | 0,05114  |
| TcCLB.504827.140 | hypothetical protein, conserved                              | -0,2332 | 0,09247  |
| TcCLB.508641.290 | hypothetical protein, conserved                              | -0,2332 | 0,105    |
| TcCLB.511725.174 | small nuclear ribonucleoprotein Sm-G, putative               | -0,2332 | 0,111    |
| TcCLB.510119.60  | hypothetical protein, conserved                              | -0,2332 | 0,211    |
| TcCLB.506797.70  | lysophospholipase, putative                                  | -0,2333 | 0,04216  |
| TcCLB.506207.30  | hypothetical protein, conserved                              | -0,2333 | 0,1775   |
| TcCLB.508533.50  | hypothetical protein, conserved                              | -0,2334 | 0,003115 |
| TcCLB.511217.150 | hypothetical protein, conserved                              | -0,2334 | 0,1857   |
| TcCLB.506363.60  | f-actin capping protein beta subunit, putative               | -0,2335 | 0,1575   |
| TcCLB.506265.110 | hypothetical protein, conserved                              | -0,2336 | 0,1516   |
| TcCLB.511559.34  | hypothetical protein, conserved                              | -0,2337 | 0,2931   |
| TcCLB.511183.565 | surface protease GP63 (pseudogene), putative                 | -0,2337 | 0,7081   |
| TcCLB.508579.40  | hypothetical protein, conserved                              | -0,2339 | 0,19     |
| TcCLB.506479.67  | hypothetical protein, conserved                              | -0,234  | 0,06291  |
| TcCLB.506625.240 | hypothetical protein, conserved                              | -0,2342 | 0,01503  |
| TcCLB.503805.9   | Quinonprotein alcohol dehydrogenase-like protein, putative   | -0,2342 | 0,09597  |
| TcCLB.506847.4   | hypothetical protein, conserved                              | -0,2342 | 0,3477   |
| TcCLB.508741.300 | proteasome regulatory non-ATPase subunit 6, putative         | -0,2343 | 0,01573  |
| TcCLB.485889.16  | hypothetical protein (fragment)                              | -0,2343 | 0,3138   |
| TcCLB.506559.460 | hypothetical protein                                         | -0,2344 | 0,09049  |
| TcCLB.506835.10  | hypothetical protein, conserved                              | -0,2345 | 0,01166  |
| TcCLB.505183.10  | hypothetical protein, conserved                              | -0,2345 | 0,0944   |
| TcCLB.511757.20  | hypothetical protein, conserved                              | -0,2345 | 0,2416   |
| TcCLB.509661.10  | retrotransposon hot spot protein (RHS, pseudogene), putative | -0,2347 | 0,1361   |
| TcCLB.509363.31  | hypothetical protein                                         | -0,2347 | 0,6196   |
| TcCLB.511517.160 | hypothetical protein, conserved                              | -0,2348 | 0,06254  |

|                  |                                                           |         |          |
|------------------|-----------------------------------------------------------|---------|----------|
| TcCLB.508323.94  | cyclophilin, putative                                     | -0,2348 | 0,2904   |
| TcCLB.509049.20  | hypothetical protein, conserved                           | -0,2349 | 0,1028   |
| TcCLB.508831.90  | hypothetical protein, conserved                           | -0,2349 | 0,2672   |
| TcCLB.510601.40  | tubulin tyrosine ligase (pseudogene), putative            | -0,2351 | 0,1814   |
| TcCLB.507873.30  | Double RNA binding domain protein 7 (DRBD7)               | -0,2352 | 0,02507  |
| TcCLB.511127.150 | hypothetical protein, conserved                           | -0,2352 | 0,117    |
| TcCLB.510747.120 | hypothetical protein, conserved                           | -0,2353 | 0,07172  |
| TcCLB.504151.50  | hypothetical protein, conserved                           | -0,2353 | 0,2741   |
| TcCLB.506489.40  | hypothetical protein, conserved                           | -0,2355 | 0,08185  |
| TcCLB.511559.30  | ras-related GTP-binding protein, putative                 | -0,2355 | 0,1475   |
| TcCLB.511419.80  | phosphatidylinositol-4-phosphate 5-kinase related         | -0,2356 | 0,1863   |
| TcCLB.509965.200 | hypothetical protein, conserved                           | -0,2358 | 0,175    |
| TcCLB.511283.90  | N-myristoyl transferase, putative                         | -0,2359 | 0,07138  |
| TcCLB.509875.220 | hypothetical protein, conserved                           | -0,236  | 0,06226  |
| TcCLB.511737.60  | hypothetical protein, conserved                           | -0,236  | 0,1001   |
| TcCLB.508211.50  | hypothetical protein, conserved                           | -0,236  | 0,1518   |
| TcCLB.506835.131 | hypothetical protein, conserved                           | -0,236  | 0,3534   |
| TcCLB.507709.140 | hypothetical protein, conserved                           | -0,2361 | 0,1135   |
| TcCLB.503457.10  | hypothetical protein                                      | -0,2361 | 0,2032   |
| TcCLB.508829.9   | dynein heavy chain, putative (fragment)                   | -0,2362 | 0,07033  |
| TcCLB.506945.300 | V-type ATPase, C subunit, putative                        | -0,2363 | 0,04718  |
| TcCLB.503909.60  | hypothetical protein, conserved                           | -0,2364 | 0,1168   |
| TcCLB.506649.80  | RNA-binding protein, putative (DRBD3)                     | -0,2367 | 0,002622 |
| TcCLB.504203.60  | TPR-repeat-containing chaperone protein DNAJ, putative (f | -0,2367 | 0,06974  |
| TcCLB.509429.230 | hypothetical protein, conserved                           | -0,2367 | 0,2072   |
| TcCLB.507541.50  | casein kinase, putative (fragment)                        | -0,237  | 0,02422  |
| TcCLB.507099.100 | hypothetical protein, conserved                           | -0,237  | 0,1427   |
| TcCLB.504163.80  | hypothetical protein, conserved                           | -0,2371 | 0,07704  |
| TcCLB.511421.217 | hypothetical protein, conserved                           | -0,2371 | 0,1695   |
| TcCLB.509319.50  | hypothetical protein, conserved                           | -0,2372 | 0,002771 |
| TcCLB.511677.10  | dispersed gene family protein 1 (DGF-1), putative         | -0,2372 | 0,1454   |
| TcCLB.508355.114 | hypothetical protein, conserved                           | -0,2373 | 0,251    |
| TcCLB.511419.20  | hypothetical protein, conserved                           | -0,2374 | 0,04997  |
| TcCLB.509767.30  | hypothetical protein                                      | -0,2374 | 0,109    |
| TcCLB.509895.50  | hypothetical protein, conserved                           | -0,2375 | 0,02768  |
| TcCLB.504239.80  | syntaxin binding protein (pseudogene), putative           | -0,2375 | 0,6437   |
| TcCLB.509507.30  | hypothetical protein, conserved                           | -0,2376 | 0,03678  |
| TcCLB.510323.90  | hypothetical protein, conserved                           | -0,2376 | 0,06396  |
| TcCLB.506007.10  | MP24, putative                                            | -0,2376 | 0,2928   |
| TcCLB.417993.10  | dispersed gene family protein 1 (DGF-1, pseudogene), puta | -0,2376 | 0,7765   |
| TcCLB.511733.120 | hypothetical protein, conserved                           | -0,2377 | 0,02711  |
| TcCLB.506945.140 | hypothetical protein, conserved (pseudogene)              | -0,2377 | 0,07728  |
| TcCLB.508169.40  | mitochondrial inner membrane signal peptidase, putative   | -0,2377 | 0,2867   |
| TcCLB.510201.40  | trans-sialidase (pseudogene), putative                    | -0,2377 | 0,3337   |
| TcCLB.508437.20  | trans-sialidase (pseudogene), putative                    | -0,2377 | 0,5509   |

|                  |                                                               |         |          |
|------------------|---------------------------------------------------------------|---------|----------|
| TcCLB.508723.70  | hypothetical protein, conserved                               | -0,2378 | 0,004214 |
| TcCLB.511289.110 | hypothetical protein, conserved                               | -0,2378 | 0,1034   |
| TcCLB.404073.20  | actin, putative (fragment)                                    | -0,2378 | 0,3732   |
| TcCLB.511449.80  | mucin-associated surface protein (MASP, pseudogene), pu       | -0,2378 | 0,7383   |
| TcCLB.511661.20  | hypothetical protein, conserved                               | -0,238  | 0,04922  |
| TcCLB.504085.20  | exosome-associated protein 2, putative (EAP2)                 | -0,238  | 0,1094   |
| TcCLB.510187.220 | hypothetical protein, conserved                               | -0,238  | 0,1523   |
| TcCLB.508761.110 | trans-sialidase, Group VI, putative                           | -0,238  | 0,4297   |
| TcCLB.507681.150 | 40S ribosomal protein S24E, putative                          | -0,2382 | 0,04096  |
| TcCLB.504035.140 | mismatch repair protein MLH1, putative                        | -0,2383 | 0,06015  |
| TcCLB.510099.40  | hypothetical protein, conserved                               | -0,2383 | 0,1024   |
| TcCLB.511161.10  | hypothetical protein, conserved (pseudogene)                  | -0,2383 | 0,3375   |
| TcCLB.508367.20  | UDP-Gal or UDP-GlcNAc-dependent glycosyltransferase, pu       | -0,2383 | 0,6022   |
| TcCLB.506925.500 | hypothetical protein, conserved                               | -0,2384 | 0,037    |
| TcCLB.506697.40  | helicase, putative                                            | -0,2385 | 0,02134  |
| TcCLB.510689.20  | quinonoid dihydropteridine reductase, putative                | -0,2385 | 0,07706  |
| TcCLB.511727.234 | hypothetical protein, conserved                               | -0,2385 | 0,08265  |
| TcCLB.505807.190 | polynucleotide kinase 3'-phosphatase, putative                | -0,2385 | 0,1402   |
| TcCLB.503703.80  | hypothetical protein, conserved                               | -0,2385 | 0,1734   |
| TcCLB.511903.70  | hypothetical protein, conserved                               | -0,2385 | 0,243    |
| TcCLB.508647.250 | phosphotransferase, putative                                  | -0,2386 | 0,02065  |
| TcCLB.505965.20  | hypothetical protein, conserved                               | -0,2386 | 0,1106   |
| TcCLB.504239.30  | mucin-associated surface protein (MASP), putative             | -0,2386 | 0,6215   |
| TcCLB.504427.130 | 5'-3' exoribonuclease C, putative (XRNC)                      | -0,2387 | 0,06763  |
| TcCLB.507927.60  | hypothetical protein, conserved                               | -0,2389 | 0,008648 |
| TcCLB.509109.180 | hypothetical protein, conserved                               | -0,2389 | 0,1033   |
| TcCLB.508325.250 | trans-sialidase (pseudogene), putative                        | -0,239  | 0,2315   |
| TcCLB.510887.60  | hypothetical protein, conserved                               | -0,2391 | 0,17     |
| TcCLB.510657.90  | hypothetical protein, conserved                               | -0,2392 | 0,2125   |
| TcCLB.504253.10  | hypothetical protein, conserved                               | -0,2393 | 0,01947  |
| TcCLB.508163.140 | mucin-associated surface protein (MASP), putative             | -0,2393 | 0,3231   |
| TcCLB.510443.40  | hypothetical protein, conserved                               | -0,2394 | 0,07165  |
| TcCLB.510731.30  | hypothetical protein, conserved                               | -0,2394 | 0,07343  |
| TcCLB.511753.70  | hypothetical protein, conserved                               | -0,2395 | 0,02018  |
| TcCLB.510423.40  | hypothetical protein, conserved                               | -0,2396 | 0,01319  |
| TcCLB.510301.60  | hypothetical protein, conserved                               | -0,2396 | 0,07137  |
| TcCLB.510317.30  | polynucleotide adenylyltransferase, putative (PAP)            | -0,2396 | 0,2167   |
| TcCLB.510009.10  | hypothetical protein, conserved                               | -0,2396 | 0,4611   |
| TcCLB.506717.10  | fatty acid elongase, putative                                 | -0,2398 | 0,1828   |
| TcCLB.463451.4   | hypothetical protein, conserved                               | -0,2399 | 0,3237   |
| TcCLB.510651.10  | hypothetical protein, conserved                               | -0,2399 | 0,347    |
| TcCLB.506941.90  | ATP-dependent DEAD/H DNA helicase recQ family, putativ        | -0,24   | 0,02431  |
| TcCLB.508625.80  | hypothetical protein, conserved                               | -0,24   | 0,07336  |
| TcCLB.506559.129 | eukaryotic translation initiation factor 2-alpha kinase, puta | -0,2402 | 0,02279  |
| TcCLB.511643.80  | hypothetical protein, conserved (pseudogene)                  | -0,2403 | 0,03809  |

|                  |                                                            |         |         |
|------------------|------------------------------------------------------------|---------|---------|
| TcCLB.508949.50  | protein kinase, putative                                   | -0,2404 | 0,1527  |
| TcCLB.503879.90  | hypothetical protein, conserved                            | -0,2406 | 0,05237 |
| TcCLB.504867.80  | DNA primase large subunit, putative (pril)                 | -0,2406 | 0,07506 |
| TcCLB.506025.20  | hypothetical protein, conserved                            | -0,2406 | 0,1023  |
| TcCLB.503823.140 | hypothetical protein, conserved                            | -0,2406 | 0,12    |
| TcCLB.508247.40  | mucin TcMUCII, putative                                    | -0,2406 | 0,691   |
| TcCLB.507019.30  | ribosome biogenesis regulatory protein (RRS1), putative    | -0,2407 | 0,06499 |
| TcCLB.504109.40  | hypothetical protein, conserved                            | -0,2407 | 0,12    |
| TcCLB.508121.110 | mucin-associated surface protein (MASP), putative          | -0,2407 | 0,4661  |
| TcCLB.506287.130 | hypothetical protein, conserved                            | -0,2408 | 0,108   |
| TcCLB.511507.10  | hypothetical protein, conserved                            | -0,2408 | 0,3207  |
| TcCLB.511353.10  | FK506-binding protein (FKBP)-type peptidyl-prolyl isomera: | -0,2409 | 0,06785 |
| TcCLB.504013.30  | hypothetical protein, conserved                            | -0,241  | 0,2313  |
| TcCLB.506559.280 | hypothetical protein, conserved                            | -0,2413 | 0,02561 |
| TcCLB.510761.30  | RNA re-capping enzyme, cytoplasmic, putative (Ce1)         | -0,2413 | 0,03062 |
| TcCLB.510655.130 | hypothetical protein, conserved                            | -0,2413 | 0,3487  |
| TcCLB.507993.180 | hypothetical protein, conserved                            | -0,2414 | 0,06109 |
| TcCLB.511127.320 | kinetoplastid kinetochore protein 10, putative (kkt10)     | -0,2414 | 0,1278  |
| TcCLB.506373.30  | retrotransposon hot spot protein (RHS, pseudogene), putat  | -0,2414 | 0,1558  |
| TcCLB.511391.180 | Golgi/lysosome glycoprotein 1, putative (GLP1)             | -0,2415 | 0,00507 |
| TcCLB.509173.9   | hypothetical protein, conserved                            | -0,2415 | 0,1083  |
| TcCLB.507977.9   | hypothetical protein, conserved (pseudogene)               | -0,2415 | 0,2428  |
| TcCLB.508313.14  | trans-sialidase, putative                                  | -0,2415 | 0,595   |
| TcCLB.510489.5   | mucin-associated surface protein (MASP), putative          | -0,2415 | 0,9006  |
| TcCLB.507897.10  | hypothetical protein, conserved                            | -0,2416 | 0,2048  |
| TcCLB.509799.60  | hypothetical protein, conserved                            | -0,2417 | 0,01016 |
| TcCLB.510301.80  | N-acetyltransferase subunit Nat1, putative                 | -0,2417 | 0,03168 |
| TcCLB.510841.10  | Kinesin-13 4b, putative (fragment) (KIN13-4b)              | -0,2417 | 0,3882  |
| TcCLB.508717.33  | mitochondrial chaperone BCS1, putative                     | -0,2418 | 0,03952 |
| TcCLB.506241.150 | hypothetical protein                                       | -0,2418 | 0,08566 |
| TcCLB.506885.380 | hypothetical protein, conserved                            | -0,2418 | 0,09389 |
| TcCLB.511907.80  | beta-ketoacyl-ACP reductase 2, putative                    | -0,2418 | 0,1168  |
| TcCLB.508231.64  | hypothetical protein, conserved                            | -0,2418 | 0,1696  |
| TcCLB.506163.20  | surface protease GP63, putative                            | -0,2418 | 0,3864  |
| TcCLB.506637.50  | hypothetical protein, conserved                            | -0,2419 | 0,1358  |
| TcCLB.510283.130 | hypothetical protein, conserved                            | -0,2419 | 0,1944  |
| TcCLB.479481.10  | mucin-associated surface protein (MASP), putative (fragm   | -0,2419 | 0,6431  |
| TcCLB.503719.30  | hypothetical protein, conserved                            | -0,242  | 0,1952  |
| TcCLB.506409.230 | hypothetical protein, conserved                            | -0,2421 | 0,09842 |
| TcCLB.511283.50  | hypothetical protein, conserved                            | -0,2421 | 0,2991  |
| TcCLB.506577.20  | hypothetical protein                                       | -0,2423 | 0,03636 |
| TcCLB.506975.9   | REL2, putative                                             | -0,2423 | 0,3515  |
| TcCLB.503977.30  | mucin-associated surface protein (MASP), putative          | -0,2423 | 0,5323  |
| TcCLB.506985.30  | proteasome alpha 3 subunit, putative                       | -0,2424 | 0,04259 |
| TcCLB.511523.4   | hypothetical protein, conserved                            | -0,2424 | 0,08898 |

|                  |                                                                |         |          |
|------------------|----------------------------------------------------------------|---------|----------|
| TcCLB.506717.219 | GMP synthase (pseudogene), putative                            | -0,2424 | 0,1019   |
| TcCLB.505965.92  | hypothetical protein, conserved (pseudogene)                   | -0,2424 | 0,3094   |
| TcCLB.510961.30  | mucin-associated surface protein (MASP), putative              | -0,2425 | 0,5148   |
| TcCLB.507723.90  | hypothetical protein, conserved                                | -0,2427 | 0,1654   |
| TcCLB.511719.41  | hypothetical protein, conserved (fragment)                     | -0,2428 | 0,1004   |
| TcCLB.510989.40  | hypothetical protein, conserved                                | -0,2428 | 0,1234   |
| TcCLB.507483.80  | hypothetical protein, conserved                                | -0,2429 | 0,1006   |
| TcCLB.511603.100 | mucin-associated surface protein (MASP), putative              | -0,2429 | 0,5359   |
| TcCLB.506567.120 | mitochondrial RNA binding protein, putative                    | -0,2431 | 0,1267   |
| TcCLB.507735.30  | hypothetical protein, conserved                                | -0,2431 | 0,1333   |
| TcCLB.510303.60  | hypothetical protein, conserved                                | -0,2431 | 0,1413   |
| TcCLB.508153.890 | hypothetical protein, conserved                                | -0,2433 | 0,002534 |
| TcCLB.509243.50  | sigma-adaptin 3, putative                                      | -0,2434 | 0,196    |
| TcCLB.511867.200 | hypothetical protein, conserved                                | -0,2435 | 0,05059  |
| TcCLB.509669.10  | hypothetical protein, conserved                                | -0,2435 | 0,2647   |
| TcCLB.508183.20  | hypothetical protein, conserved                                | -0,2437 | 0,08125  |
| TcCLB.506733.70  | glycosyl transferase-like protein, putative                    | -0,2437 | 0,1798   |
| TcCLB.506413.89  | trans-sialidase, putative                                      | -0,2439 | 0,0376   |
| TcCLB.508153.600 | actin-like protein, putative                                   | -0,2439 | 0,1376   |
| TcCLB.441967.9   | hypothetical protein, conserved                                | -0,2439 | 0,1415   |
| TcCLB.510889.352 | retrotransposon hot spot (RHS) protein, putative (fragment)    | -0,244  | 0,571    |
| TcCLB.504171.59  | pseudouridine synthase TruD, putative                          | -0,2443 | 0,1516   |
| TcCLB.509823.10  | hypothetical protein, conserved                                | -0,2443 | 0,2154   |
| TcCLB.510747.114 | hypothetical protein, conserved                                | -0,2443 | 0,4206   |
| TcCLB.511717.130 | hypothetical protein, conserved                                | -0,2444 | 0,1199   |
| TcCLB.506895.60  | hypothetical protein, conserved (pseudogene)                   | -0,2446 | 0,07713  |
| TcCLB.510431.160 | nucleolar GTP-binding protein 1, putative                      | -0,2447 | 0,06831  |
| TcCLB.511911.120 | DNA polymerase eta, putative                                   | -0,2447 | 0,07415  |
| TcCLB.506247.350 | hypothetical protein, conserved                                | -0,2447 | 0,08298  |
| TcCLB.510911.20  | hypothetical protein, conserved                                | -0,2448 | 0,1019   |
| TcCLB.507519.164 | hypothetical protein, conserved                                | -0,2449 | 0,2525   |
| TcCLB.506901.10  | mucin TcMUCL, putative                                         | -0,2449 | 0,8052   |
| TcCLB.504105.130 | Flagellum surface protein 179 (FS179)                          | -0,245  | 0,01618  |
| TcCLB.509941.100 | 2,4-dienoyl-coa reductase fadh1, putative                      | -0,245  | 0,01648  |
| TcCLB.508413.50  | RNA-binding protein, putative                                  | -0,245  | 0,01784  |
| TcCLB.511559.70  | phospholipid transporting ATPase-like protein (pseudogene)     | -0,245  | 0,03459  |
| TcCLB.511353.40  | eukaryotic translation initiation factor 4E (eIF4E) interactir | -0,245  | 0,0877   |
| TcCLB.505807.240 | hypothetical protein, conserved                                | -0,2451 | 0,1419   |
| TcCLB.479379.9   | dynein heavy chain, putative                                   | -0,2452 | 0,02371  |
| TcCLB.503459.29  | hypothetical protein, conserved                                | -0,2452 | 0,1427   |
| TcCLB.511753.150 | hypothetical protein, conserved                                | -0,2452 | 0,1771   |
| TcCLB.510625.10  | dispersed gene family protein 1 (DGF-1), putative              | -0,2452 | 0,4462   |
| TcCLB.510943.36  | hypothetical protein, conserved                                | -0,2453 | 0,06409  |
| TcCLB.508707.194 | hypothetical protein, conserved                                | -0,2454 | 0,01867  |
| TcCLB.503419.60  | Enriched in surface-labeled proteome protein 15 (ESP15)        | -0,2454 | 0,03677  |



|                  |                                                         |         |          |
|------------------|---------------------------------------------------------|---------|----------|
| TcCLB.510265.90  | hypothetical protein, conserved                         | -0,2454 | 0,06976  |
| TcCLB.508675.20  | DNA excision repair protein, putative                   | -0,2455 | 0,01731  |
| TcCLB.507061.34  | hypothetical protein, conserved                         | -0,2455 | 0,1348   |
| TcCLB.506743.220 | hypothetical protein, conserved                         | -0,2455 | 0,3472   |
| TcCLB.507681.130 | hypothetical protein, conserved                         | -0,2456 | 0,007902 |
| TcCLB.507039.10  | iron superoxide dismutase, putative                     | -0,2456 | 0,01131  |
| TcCLB.510187.540 | amino acid permease, putative                           | -0,2456 | 0,04938  |
| TcCLB.511439.90  | hypothetical protein, conserved                         | -0,2456 | 0,5156   |
| TcCLB.506581.10  | dolicholphosphate-mannose synthase, putative (DPMS)     | -0,2457 | 0,1669   |
| TcCLB.508721.10  | small GTPase, putative                                  | -0,2458 | 0,08849  |
| TcCLB.509073.119 | proteasome regulatory non-ATP-ase subunit 7, putative   | -0,2458 | 0,1155   |
| TcCLB.510329.240 | hypothetical protein, conserved                         | -0,2458 | 0,1687   |
| TcCLB.511287.140 | hypothetical protein, conserved                         | -0,2459 | 0,0143   |
| TcCLB.507037.60  | hypothetical protein, conserved                         | -0,246  | 0,01274  |
| TcCLB.510897.3   | A/G-specific adenine glycosylase (pseudogene), putative | -0,246  | 0,5081   |
| TcCLB.506953.10  | hypothetical protein, conserved (pseudogene)            | -0,246  | 0,5447   |
| TcCLB.510123.24  | hypothetical protein, conserved                         | -0,2461 | 0,07485  |
| TcCLB.509669.120 | hypothetical protein, conserved (pseudogene)            | -0,2461 | 0,0765   |
| TcCLB.508475.40  | hypothetical protein                                    | -0,2461 | 0,3099   |
| TcCLB.506459.160 | mucin TcMUCII (pseudogene), putative                    | -0,2461 | 0,605    |
| TcCLB.504039.70  | hypothetical protein                                    | -0,2461 | 0,7195   |
| TcCLB.509059.20  | hypothetical protein, conserved                         | -0,2462 | 0,03576  |
| TcCLB.506177.150 | hypothetical protein, conserved                         | -0,2462 | 0,0484   |
| TcCLB.511909.10  | hypothetical protein, conserved                         | -0,2463 | 0,006563 |
| TcCLB.509525.410 | mucin-associated surface protein (MASP, pseudogene), pu | -0,2463 | 0,5612   |
| TcCLB.508349.39  | RNA-binding protein, putative (fragment) (DRBD3)        | -0,2464 | 0,04515  |
| TcCLB.510455.10  | dispersed gene family protein 1 (DGF-1), putative       | -0,2466 | 0,6702   |
| TcCLB.506297.40  | hypothetical protein, conserved                         | -0,2467 | 0,001251 |
| TcCLB.510657.70  | hypothetical protein, conserved (pseudogene)            | -0,2468 | 0,2379   |
| TcCLB.506529.410 | primase 2, putative                                     | -0,2469 | 0,0157   |
| TcCLB.510065.50  | hypothetical protein, conserved                         | -0,2469 | 0,1564   |
| TcCLB.510657.220 | hypothetical protein, conserved                         | -0,2469 | 0,1842   |
| TcCLB.511181.60  | hypothetical protein, conserved                         | -0,247  | 0,07974  |
| TcCLB.508479.310 | hypothetical protein, conserved                         | -0,247  | 0,08347  |
| TcCLB.509261.40  | UDP-Gal or UDP-GlcNAc-dependent glycosyltransferase, pu | -0,247  | 0,4181   |
| TcCLB.508541.80  | mucin TcMUCII, putative                                 | -0,247  | 0,538    |
| TcCLB.508827.139 | Coatomer subunit gamma (fragment) (COPG)                | -0,2471 | 0,01313  |
| TcCLB.507993.369 | sjogren s syndrome nuclear autoantigen 1, putative      | -0,2471 | 0,1527   |
| TcCLB.506203.40  | hypothetical protein, conserved                         | -0,2472 | 0,00866  |
| TcCLB.511285.20  | hypothetical protein, conserved                         | -0,2472 | 0,01181  |
| TcCLB.508909.300 | hypothetical protein, conserved                         | -0,2472 | 0,07315  |
| TcCLB.511421.160 | hypothetical protein, conserved                         | -0,2473 | 0,1418   |
| TcCLB.510187.330 | hypothetical protein, conserved                         | -0,2474 | 0,02226  |
| TcCLB.503909.100 | mannosyltransferase, putative                           | -0,2474 | 0,09091  |
| TcCLB.509103.4   | protein kinase, putative                                | -0,2475 | 0,5086   |

|                  |                                                         |         |          |
|------------------|---------------------------------------------------------|---------|----------|
| TcCLB.511263.20  | hypothetical protein, conserved                         | -0,2476 | 0,008438 |
| TcCLB.508297.30  | hypothetical protein, conserved                         | -0,2476 | 0,07176  |
| TcCLB.507949.120 | Transmembrane protein 231, putative                     | -0,2477 | 0,06641  |
| TcCLB.503555.20  | hypothetical protein, conserved                         | -0,2477 | 0,1209   |
| TcCLB.407477.40  | hypothetical protein, conserved                         | -0,2477 | 0,1595   |
| TcCLB.508321.60  | hypothetical protein, conserved                         | -0,2478 | 0,02583  |
| TcCLB.508347.150 | hypothetical protein, conserved                         | -0,2481 | 0,01681  |
| TcCLB.508857.90  | hypothetical protein, conserved                         | -0,2481 | 0,04995  |
| TcCLB.510519.20  | hypothetical protein, conserved                         | -0,2481 | 0,1226   |
| TcCLB.509753.70  | mucin-associated surface protein (MASP), putative       | -0,2481 | 0,6534   |
| TcCLB.511603.450 | trans-sialidase, Group V, putative                      | -0,2481 | 0,6593   |
| TcCLB.509399.110 | hypothetical protein, conserved                         | -0,2482 | 0,06036  |
| TcCLB.509023.140 | hypothetical protein, conserved                         | -0,2482 | 0,1557   |
| TcCLB.503801.60  | hypothetical protein                                    | -0,2482 | 0,1558   |
| TcCLB.509795.20  | hypothetical protein, conserved                         | -0,2482 | 0,1929   |
| TcCLB.507611.230 | trans-sialidase (pseudogene), putative                  | -0,2482 | 0,2226   |
| TcCLB.508199.60  | hypothetical protein, conserved                         | -0,2482 | 0,27     |
| TcCLB.507277.10  | hypothetical protein, conserved                         | -0,2483 | 0,1083   |
| TcCLB.509991.20  | conserved protein, unknown function                     | -0,2484 | 0,01886  |
| TcCLB.510121.60  | hypothetical protein, conserved                         | -0,2484 | 0,1067   |
| TcCLB.508029.40  | hypothetical protein                                    | -0,2484 | 0,2494   |
| TcCLB.511277.510 | hypothetical protein, conserved                         | -0,2485 | 0,01347  |
| TcCLB.506621.70  | hypothetical protein, conserved                         | -0,2485 | 0,04248  |
| TcCLB.509559.40  | trans-sialidase (pseudogene), putative                  | -0,2485 | 0,2538   |
| TcCLB.509601.110 | hypothetical protein, conserved                         | -0,2486 | 0,1016   |
| TcCLB.511661.10  | hypothetical protein, conserved                         | -0,2487 | 0,00953  |
| TcCLB.510741.220 | hypothetical protein, conserved                         | -0,2487 | 0,03576  |
| TcCLB.511733.30  | hypothetical protein, conserved                         | -0,2488 | 0,1554   |
| TcCLB.503929.40  | hypothetical protein, conserved                         | -0,2488 | 0,2176   |
| TcCLB.509937.160 | hypothetical protein, conserved                         | -0,2489 | 0,01875  |
| TcCLB.509065.110 | hypothetical protein, conserved                         | -0,2489 | 0,02282  |
| TcCLB.508879.190 | hypothetical protein, conserved                         | -0,2489 | 0,07578  |
| TcCLB.508909.339 | hypothetical protein, conserved                         | -0,2489 | 0,08699  |
| TcCLB.510609.110 | ATP-dependent RNA helicase, putative                    | -0,2489 | 0,09291  |
| TcCLB.508307.40  | hypothetical protein, conserved                         | -0,2489 | 0,1853   |
| TcCLB.506405.20  | hypothetical protein, conserved                         | -0,2489 | 0,2729   |
| TcCLB.511173.280 | trans-sialidase, Group V, putative                      | -0,2489 | 0,4267   |
| TcCLB.504089.30  | hypothetical protein, conserved                         | -0,2491 | 0,02154  |
| TcCLB.507529.45  | hypothetical protein, conserved                         | -0,2491 | 0,2096   |
| TcCLB.416891.19  | hypothetical protein                                    | -0,2491 | 0,3801   |
| TcCLB.509143.10  | hypothetical protein, conserved                         | -0,2492 | 0,01652  |
| TcCLB.507957.60  | mucin-associated surface protein (MASP, pseudogene), pu | -0,2492 | 0,5852   |
| TcCLB.504625.70  | kinetoplast DNA-associated protein, putative            | -0,2493 | 0,01913  |
| TcCLB.503967.10  | hypothetical protein, conserved                         | -0,2493 | 0,08885  |
| TcCLB.509179.40  | hypothetical protein, conserved                         | -0,2493 | 0,1259   |

|                  |                                                           |         |          |
|------------------|-----------------------------------------------------------|---------|----------|
| TcCLB.509687.19  | dispersed gene family protein 1 (DGF-1), putative (fragme | -0,2494 | 0,4107   |
| TcCLB.510553.25  | elongation factor 1-gamma (EF-1-gamma, pseudogene), p     | -0,2494 | 0,6871   |
| TcCLB.506481.39  | hypothetical protein, conserved                           | -0,2496 | 0,009574 |
| TcCLB.511743.20  | hypothetical protein, conserved                           | -0,2496 | 0,03513  |
| TcCLB.503745.10  | hypothetical protein, conserved                           | -0,2496 | 0,06202  |
| TcCLB.503881.30  | retrotransposon hot spot (RHS) protein, putative          | -0,2496 | 0,3179   |
| TcCLB.417939.9   | dispersed gene family protein 1 (DGF-1), putative         | -0,2496 | 0,5169   |
| TcCLB.511293.20  | hypothetical protein, conserved                           | -0,2497 | 0,004003 |
| TcCLB.511131.70  | hypothetical protein, conserved                           | -0,2497 | 0,1128   |
| TcCLB.511031.40  | hypothetical protein, conserved                           | -0,2497 | 0,134    |
| TcCLB.511861.7   | elongation factor 1-gamma (EF-1-gamma), putative          | -0,2498 | 0,5867   |
| TcCLB.506245.60  | trans-sialidase, Group V, putative                        | -0,2499 | 0,6071   |
| TcCLB.506243.135 | hypothetical protein, conserved (pseudogene)              | -0,2501 | 0,4421   |
| TcCLB.508465.120 | syntaxin, putative                                        | -0,2502 | 0,08046  |
| TcCLB.509267.90  | ATP-dependent RNA helicase, putative                      | -0,2502 | 0,1187   |
| TcCLB.507641.150 | hypothetical protein, conserved                           | -0,2503 | 0,009753 |
| TcCLB.506871.150 | hypothetical protein, conserved                           | -0,2505 | 0,03965  |
| TcCLB.506009.100 | ADP-ribosylation factor-like protein, putative            | -0,2505 | 0,1346   |
| TcCLB.506739.170 | hypothetical protein, conserved                           | -0,2506 | 0,03302  |
| TcCLB.509897.270 | trans-sialidase, Group V, putative                        | -0,2506 | 0,2815   |
| TcCLB.511291.129 | hypothetical protein, conserved                           | -0,2507 | 0,2822   |
| TcCLB.509789.59  | hypothetical protein, conserved                           | -0,2508 | 0,007328 |
| TcCLB.511421.10  | hypothetical protein, conserved                           | -0,2508 | 0,01179  |
| TcCLB.507023.10  | epsilon-adaptin, putative                                 | -0,2509 | 0,006301 |
| TcCLB.506963.40  | hypothetical protein, conserved                           | -0,2509 | 0,03971  |
| TcCLB.507063.140 | hypothetical protein, conserved                           | -0,2509 | 0,2433   |
| TcCLB.507883.60  | hypothetical protein, conserved                           | -0,251  | 0,06849  |
| TcCLB.508231.220 | hypothetical protein, conserved                           | -0,251  | 0,3219   |
| TcCLB.509029.30  | hypothetical protein, conserved                           | -0,2511 | 0,1844   |
| TcCLB.511859.30  | hypothetical protein, conserved                           | -0,2512 | 0,1093   |
| TcCLB.510587.20  | mucin-associated surface protein (MASP, pseudogene), pu   | -0,2513 | 0,6993   |
| TcCLB.507795.30  | intraflagellar transport protein 27 (IFT27)               | -0,2514 | 0,07558  |
| TcCLB.508881.54  | hypothetical protein, conserved                           | -0,2514 | 0,1056   |
| TcCLB.510645.9   | serine/threonine protein kinase, putative                 | -0,2515 | 0,03507  |
| TcCLB.510755.50  | ADP-ribosylation factor 1, putative (ARF1)                | -0,2516 | 0,007556 |
| TcCLB.505997.210 | DNA-directed RNA polymerase III subunit, putative         | -0,2516 | 0,2161   |
| TcCLB.506139.110 | mucin-associated surface protein (MASP), putative         | -0,2516 | 0,6814   |
| TcCLB.511283.40  | syntaxin 5, putative                                      | -0,2517 | 0,06814  |
| TcCLB.510143.17  | hypothetical protein, conserved                           | -0,2517 | 0,1243   |
| TcCLB.506661.70  | hypothetical protein, conserved                           | -0,2517 | 0,145    |
| TcCLB.503717.5   | mucin TcMUCII (pseudogene), putative                      | -0,2517 | 0,7333   |
| TcCLB.511389.40  | hypothetical protein, conserved                           | -0,2518 | 0,005988 |
| TcCLB.506127.20  | Nuclear RNA export factor (MEX67)                         | -0,2518 | 0,04225  |
| TcCLB.506755.230 | hypothetical protein, conserved                           | -0,2518 | 0,1687   |
| TcCLB.510741.30  | hypothetical protein, conserved                           | -0,2519 | 0,02013  |

|                  |                                                              |         |          |
|------------------|--------------------------------------------------------------|---------|----------|
| TcCLB.508593.40  | hypothetical protein, conserved                              | -0,252  | 0,1284   |
| TcCLB.503957.25  | trans-sialidase (pseudogene), putative                       | -0,252  | 0,4329   |
| TcCLB.508785.4   | hypothetical protein, conserved (fragment)                   | -0,2521 | 0,02559  |
| TcCLB.503635.50  | hypothetical protein, conserved                              | -0,2521 | 0,064    |
| TcCLB.509893.29  | hypothetical protein, conserved                              | -0,2521 | 0,1887   |
| TcCLB.509525.320 | mucin TcMUCII, putative                                      | -0,2522 | 0,6535   |
| TcCLB.504153.100 | Tubulin cofactor C domain-containing protein 1, putative (t  | -0,2523 | 0,04178  |
| TcCLB.509023.50  | kinesin, putative                                            | -0,2524 | 0,02136  |
| TcCLB.507591.15  | trans-sialidase (pseudogene), putative                       | -0,2526 | 0,1397   |
| TcCLB.509385.11  | retrotransposon hot spot protein (RHS, pseudogene), putat    | -0,2526 | 0,3926   |
| TcCLB.506811.40  | hypothetical protein, conserved                              | -0,2529 | 0,02771  |
| TcCLB.508153.510 | serine/threonine-protein kinase Nek, putative                | -0,2529 | 0,05573  |
| TcCLB.509757.30  | stress-inducible protein STI1-like, putative                 | -0,2529 | 0,1623   |
| TcCLB.509127.70  | hypothetical protein, conserved                              | -0,253  | 0,05089  |
| TcCLB.506855.270 | hypothetical protein, conserved                              | -0,253  | 0,253    |
| TcCLB.503757.49  | hypothetical protein, conserved (fragment)                   | -0,253  | 0,5409   |
| TcCLB.509569.10  | hypothetical protein, conserved                              | -0,2533 | 0,1683   |
| TcCLB.508409.250 | hypothetical protein, conserved                              | -0,2534 | 0,1494   |
| TcCLB.503659.20  | mucin TcMUCII (pseudogene), putative                         | -0,2534 | 0,4629   |
| TcCLB.506833.9   | hypothetical protein, conserved                              | -0,2536 | 0,07173  |
| TcCLB.509017.24  | hypothetical protein, conserved                              | -0,2537 | 0,05675  |
| TcCLB.509065.150 | hypothetical protein, conserved                              | -0,2537 | 0,0869   |
| TcCLB.507539.20  | hypothetical protein, conserved                              | -0,2538 | 0,3959   |
| TcCLB.508869.10  | hypothetical protein                                         | -0,2538 | 0,6205   |
| TcCLB.506815.30  | beta prime cop protein, putative                             | -0,2539 | 0,01085  |
| TcCLB.504111.49  | hypothetical protein, conserved                              | -0,2539 | 0,02735  |
| TcCLB.506443.40  | mitochondrial pyruvate carrier protein 2, putative           | -0,2539 | 0,04824  |
| TcCLB.503713.40  | hypothetical protein                                         | -0,2539 | 0,4082   |
| TcCLB.507509.89  | cleavage and polyadenylation specificity factor-like protein | -0,254  | 0,03584  |
| TcCLB.506753.164 | hypothetical protein, conserved                              | -0,254  | 0,292    |
| TcCLB.511459.60  | hypothetical protein, conserved                              | -0,2541 | 0,2284   |
| TcCLB.507809.130 | hypothetical protein, conserved                              | -0,2542 | 0,008178 |
| TcCLB.506559.100 | multidrug resistance-associated protein, putative            | -0,2542 | 0,01589  |
| TcCLB.511751.220 | hypothetical protein, conserved                              | -0,2542 | 0,04319  |
| TcCLB.508275.9   | dynein heavy chain, putative (fragment)                      | -0,2543 | 0,05277  |
| TcCLB.504153.150 | Unc104-like kinesin, putative                                | -0,2544 | 0,005387 |
| TcCLB.506803.20  | trans-sialidase (pseudogene), putative                       | -0,2544 | 0,1369   |
| TcCLB.504239.401 | hypothetical protein, conserved (pseudogene)                 | -0,2544 | 0,7007   |
| TcCLB.504103.20  | hypothetical protein, conserved                              | -0,2545 | 0,0035   |
| TcCLB.506671.70  | dispersed gene family protein 1 (DGF-1), putative            | -0,2547 | 0,3783   |
| TcCLB.509643.10  | hypothetical protein, conserved                              | -0,2547 | 0,4288   |
| TcCLB.511255.360 | mucin-associated surface protein (MASP), putative            | -0,2547 | 0,5538   |
| TcCLB.508207.190 | hypothetical protein, conserved                              | -0,2548 | 0,03889  |
| TcCLB.511383.40  | hypothetical protein, conserved                              | -0,2548 | 0,06021  |
| TcCLB.505183.160 | hypothetical protein, conserved                              | -0,2549 | 0,07713  |

|                  |                                                          |         |          |
|------------------|----------------------------------------------------------|---------|----------|
| TcCLB.510195.9   | dispersed gene family protein 1 (DGF-1), putative        | -0,2549 | 0,2241   |
| TcCLB.506025.10  | hypothetical protein, conserved                          | -0,255  | 0,08454  |
| TcCLB.509201.20  | hypothetical protein, conserved                          | -0,2551 | 0,518    |
| TcCLB.506863.80  | serine/threonine protein phosphatase, putative           | -0,2552 | 0,06699  |
| TcCLB.506139.40  | mucin-associated surface protein (MASP), putative        | -0,2552 | 0,545    |
| TcCLB.503823.150 | hypothetical protein, conserved                          | -0,2553 | 0,08345  |
| TcCLB.507389.50  | hypothetical protein, conserved                          | -0,2553 | 0,08349  |
| TcCLB.507641.140 | ATP-dependent DEAD/H RNA helicase, putative              | -0,2554 | 0,003708 |
| TcCLB.507005.50  | hypothetical protein                                     | -0,2554 | 0,03955  |
| TcCLB.511209.60  | hypothetical protein, conserved                          | -0,2554 | 0,06761  |
| TcCLB.506829.10  | hypothetical protein, conserved                          | -0,2555 | 0,01536  |
| TcCLB.511507.30  | cyclosome subunit, putative                              | -0,2555 | 0,01602  |
| TcCLB.507825.10  | hypothetical protein, conserved                          | -0,2555 | 0,1858   |
| TcCLB.509639.20  | hypothetical protein, conserved                          | -0,2556 | 0,1132   |
| TcCLB.509835.20  | guanine nucleotide exchange factor subunit GCD2          | -0,2557 | 0,06396  |
| TcCLB.509625.20  | hypothetical protein, conserved                          | -0,2557 | 0,3563   |
| TcCLB.508221.580 | mucin-associated surface protein (MASP), putative        | -0,2557 | 0,639    |
| TcCLB.508297.14  | trans-sialidase (pseudogene), putative                   | -0,256  | 0,1218   |
| TcCLB.505171.80  | hypothetical protein, conserved                          | -0,2561 | 0,02504  |
| TcCLB.507723.60  | hypothetical protein                                     | -0,2562 | 0,1858   |
| TcCLB.510329.280 | protein farnesyltransferase alpha subunit, putative      | -0,2564 | 0,02329  |
| TcCLB.506711.30  | cyclin, putative                                         | -0,2564 | 0,1227   |
| TcCLB.508649.5   | tryparedoxin peroxidase, putative (fragment)             | -0,2565 | 0,0234   |
| TcCLB.506363.50  | hypothetical protein, conserved                          | -0,2566 | 0,009765 |
| TcCLB.508515.110 | hypothetical protein, conserved                          | -0,2569 | 0,01594  |
| TcCLB.506649.10  | hypothetical protein                                     | -0,2569 | 0,1206   |
| TcCLB.509047.20  | hypothetical protein                                     | -0,257  | 0,07405  |
| TcCLB.509259.30  | mucin-associated surface protein (MASP, pseudogene), pu  | -0,257  | 0,3803   |
| TcCLB.510565.150 | surface protease GP63, putative                          | -0,2572 | 0,1294   |
| TcCLB.509777.100 | ubiquitin-activating enzyme, putative                    | -0,2574 | 0,03377  |
| TcCLB.507049.70  | hypothetical protein, conserved                          | -0,2574 | 0,1205   |
| TcCLB.484949.9   | AGC/RSK family serine/threonine kinase, putative (fragme | -0,2574 | 0,3509   |
| TcCLB.509215.10  | DNA polymerase delta catalytic subunit, putative         | -0,2576 | 0,003086 |
| TcCLB.506565.4   | RNA-binding protein, putative                            | -0,2576 | 0,4789   |
| TcCLB.508229.40  | trans-sialidase, Group V, putative                       | -0,2577 | 0,1335   |
| TcCLB.506475.40  | MORN repeat-containing protein                           | -0,2578 | 0,01332  |
| TcCLB.506755.180 | hypothetical protein, conserved                          | -0,2578 | 0,1932   |
| TcCLB.507021.80  | hypothetical protein, conserved                          | -0,2579 | 0,09842  |
| TcCLB.510765.70  | 60S ribosomal protein L5, putative                       | -0,258  | 0,02503  |
| TcCLB.511257.20  | hypothetical protein, conserved                          | -0,258  | 0,05444  |
| TcCLB.508211.10  | oxysterol-binding protein, putative                      | -0,258  | 0,133    |
| TcCLB.508325.25  | trans-sialidase (pseudogene), putative                   | -0,258  | 0,2699   |
| TcCLB.413977.10  | guide RNA associated protein, GAP1, putative             | -0,2581 | 0,04198  |
| TcCLB.504057.70  | hypothetical protein, conserved                          | -0,2582 | 0,08546  |
| TcCLB.508163.340 | trans-sialidase (pseudogene), putative                   | -0,2582 | 0,6256   |

|                  |                                                          |         |          |
|------------------|----------------------------------------------------------|---------|----------|
| TcCLB.506885.140 | trans-sialidase (pseudogene), putative                   | -0,2583 | 0,231    |
| TcCLB.507603.40  | proteasome beta-1 subunit, putative                      | -0,2584 | 0,02349  |
| TcCLB.510141.4   | hypothetical protein, conserved (fragment)               | -0,2584 | 0,1298   |
| TcCLB.508707.110 | hypothetical protein, conserved                          | -0,2584 | 0,2498   |
| TcCLB.506321.180 | hypothetical protein                                     | -0,2585 | 0,733    |
| TcCLB.508461.360 | hypothetical protein, conserved                          | -0,2586 | 0,01075  |
| TcCLB.508891.20  | hypothetical protein, conserved                          | -0,2586 | 0,03196  |
| TcCLB.510283.150 | hypothetical protein, conserved                          | -0,2587 | 0,2318   |
| TcCLB.506473.14  | Protein transport protein yif1, putative                 | -0,2588 | 0,09171  |
| TcCLB.511245.40  | hypothetical protein                                     | -0,259  | 0,1022   |
| TcCLB.511751.191 | hypothetical protein (pseudogene)                        | -0,259  | 0,1323   |
| TcCLB.507021.70  | hypothetical protein, conserved                          | -0,2591 | 0,03617  |
| TcCLB.506697.30  | serine/threonine-protein kinase Nek, putative            | -0,2591 | 0,03855  |
| TcCLB.511127.190 | hypothetical protein, conserved                          | -0,2591 | 0,05147  |
| TcCLB.507081.120 | hypothetical protein, conserved                          | -0,2592 | 0,07347  |
| TcCLB.506945.180 | hypothetical protein, conserved                          | -0,2593 | 0,007445 |
| TcCLB.508641.90  | hypothetical protein, conserved                          | -0,2593 | 0,02067  |
| TcCLB.510575.40  | hypothetical protein, conserved                          | -0,2593 | 0,06759  |
| TcCLB.506855.70  | hypothetical protein, conserved                          | -0,2594 | 0,01395  |
| TcCLB.506407.60  | hypothetical protein, conserved                          | -0,2594 | 0,1015   |
| TcCLB.508633.10  | trans-sialidase (pseudogene), putative                   | -0,2594 | 0,5454   |
| TcCLB.508995.69  | pseudouridine synthase TruD, putative (fragment)         | -0,2596 | 0,04069  |
| TcCLB.503527.20  | hypothetical protein, conserved                          | -0,2596 | 0,06365  |
| TcCLB.509099.59  | hypothetical protein, conserved                          | -0,2596 | 0,1008   |
| TcCLB.511109.20  | hypothetical protein, conserved                          | -0,2596 | 0,1878   |
| TcCLB.510565.141 | hypothetical protein, conserved                          | -0,2596 | 0,2124   |
| TcCLB.508355.110 | hypothetical protein                                     | -0,2597 | 0,05821  |
| TcCLB.510747.110 | hypothetical protein, conserved                          | -0,2597 | 0,1185   |
| TcCLB.509033.44  | hypothetical protein, conserved                          | -0,2597 | 0,5315   |
| TcCLB.506971.80  | mucin-associated surface protein (MASP), putative (fragm | -0,2598 | 0,551    |
| TcCLB.508299.20  | hypothetical protein, conserved                          | -0,26   | 0,1264   |
| TcCLB.510257.40  | hypothetical protein, conserved                          | -0,2602 | 0,1177   |
| TcCLB.506511.80  | hypothetical protein, conserved                          | -0,2603 | 0,02186  |
| TcCLB.505025.130 | mucin-associated surface protein (MASP), putative        | -0,2603 | 0,6547   |
| TcCLB.511281.59  | hypothetical protein, conserved                          | -0,2604 | 0,0492   |
| TcCLB.506359.90  | hypothetical protein, conserved                          | -0,2604 | 0,05641  |
| TcCLB.508231.210 | hypothetical protein, conserved                          | -0,2607 | 0,02448  |
| TcCLB.511135.40  | hypothetical protein, conserved                          | -0,2608 | 0,1294   |
| TcCLB.506267.39  | mucin-associated surface protein (MASP, pseudogene), pu  | -0,2608 | 0,2764   |
| TcCLB.504157.110 | dynein intermediate chain, putative                      | -0,2609 | 0,08454  |
| TcCLB.509715.30  | cullin-like protein, putative                            | -0,2611 | 0,03474  |
| TcCLB.507677.20  | hypothetical protein, conserved                          | -0,2612 | 0,1458   |
| TcCLB.510689.89  | hypothetical protein, conserved                          | -0,2612 | 0,4563   |
| TcCLB.505123.20  | hypothetical protein, conserved                          | -0,2612 | 0,477    |
| TcCLB.509053.50  | hypothetical protein, conserved                          | -0,2613 | 0,3502   |

|                  |                                                           |         |          |
|------------------|-----------------------------------------------------------|---------|----------|
| TcCLB.504147.140 | hypothetical protein                                      | -0,2614 | 0,02306  |
| TcCLB.507993.10  | hypothetical protein, conserved                           | -0,2614 | 0,04917  |
| TcCLB.504255.10  | hypothetical protein, conserved                           | -0,2614 | 0,1247   |
| TcCLB.510241.110 | hypothetical protein, conserved                           | -0,2615 | 0,00373  |
| TcCLB.508207.270 | hypothetical protein, conserved                           | -0,2616 | 0,01648  |
| TcCLB.510517.100 | hypothetical protein, conserved                           | -0,2617 | 0,1146   |
| TcCLB.507669.50  | hypothetical protein, conserved                           | -0,2618 | 0,00149  |
| TcCLB.509429.100 | PITH domain-containing protein                            | -0,2618 | 0,07623  |
| TcCLB.503521.10  | hypothetical protein                                      | -0,2619 | 0,03592  |
| TcCLB.506531.40  | hypothetical protein, conserved                           | -0,2619 | 0,04305  |
| TcCLB.506585.50  | hypothetical protein, conserved                           | -0,2619 | 0,05854  |
| TcCLB.506979.10  | hypothetical protein, conserved                           | -0,2619 | 0,06373  |
| TcCLB.506655.7   | phospholipid-transporting ATPase, putative (fragment)     | -0,2619 | 0,1524   |
| TcCLB.506317.30  | hypothetical protein, conserved (pseudogene)              | -0,262  | 0,05873  |
| TcCLB.511079.25  | mucin-associated surface protein (MASP, pseudogene), pu   | -0,262  | 0,5655   |
| TcCLB.510743.110 | hypothetical protein, conserved                           | -0,2621 | 0,09114  |
| TcCLB.482097.10  | hypothetical protein, conserved (fragment)                | -0,2621 | 0,3885   |
| TcCLB.506671.41  | elongation factor 1-gamma (EF-1-gamma, pseudogene), p     | -0,2621 | 0,7159   |
| TcCLB.506529.669 | hypothetical protein, conserved                           | -0,2622 | 0,2117   |
| TcCLB.506513.200 | histone H2A, putative                                     | -0,2622 | 0,7155   |
| TcCLB.511151.50  | phosphoadenosine phosphosulfate reductase-like protein,   | -0,2623 | 0,02931  |
| TcCLB.510687.20  | hypothetical protein, conserved                           | -0,2623 | 0,08919  |
| TcCLB.510595.4   | hypothetical protein, conserved                           | -0,2623 | 0,2773   |
| TcCLB.506599.310 | mucin-associated surface protein (MASP), putative         | -0,2623 | 0,7026   |
| TcCLB.509719.30  | hypothetical protein, conserved                           | -0,2625 | 0,1041   |
| TcCLB.503765.10  | trans-sialidase (pseudogene), putative                    | -0,2625 | 0,2562   |
| TcCLB.510535.60  | CCR4 associated factor, putative                          | -0,2626 | 0,02091  |
| TcCLB.504253.20  | hypothetical protein, conserved                           | -0,2626 | 0,04061  |
| TcCLB.509695.80  | hypothetical protein, conserved                           | -0,2626 | 0,04418  |
| TcCLB.507603.130 | hypothetical protein, conserved                           | -0,2626 | 0,09018  |
| TcCLB.506435.180 | hypothetical protein, conserved                           | -0,2627 | 0,1874   |
| TcCLB.511145.89  | hypothetical protein, conserved                           | -0,2627 | 0,2169   |
| TcCLB.511099.190 | mucin-associated surface protein (MASP), putative         | -0,2627 | 0,5247   |
| TcCLB.508633.20  | trans-sialidase, Group V, putative                        | -0,2627 | 0,5804   |
| TcCLB.507887.20  | ubiquitin hydrolase, putative                             | -0,2629 | 0,004155 |
| TcCLB.507801.140 | TPR-repeat protein, putative                              | -0,2629 | 0,03319  |
| TcCLB.511239.40  | hypothetical protein, conserved                           | -0,2629 | 0,0332   |
| TcCLB.506179.50  | hypothetical protein, conserved                           | -0,2631 | 0,08607  |
| TcCLB.511349.61  | retrotransposon hot spot protein (RHS, pseudogene), putat | -0,2631 | 0,6593   |
| TcCLB.509897.190 | hypothetical protein, conserved (pseudogene)              | -0,2632 | 0,02606  |
| TcCLB.511355.7   | TFIID-like protein, putative (fragment)                   | -0,2632 | 0,1044   |
| TcCLB.507979.20  | hypothetical protein, conserved                           | -0,2632 | 0,1216   |
| TcCLB.507011.269 | 6-phosphogluconate dehydrogenase, decarboxylating (6PG    | -0,2632 | 0,2388   |
| TcCLB.506739.150 | 60S ribosomal protein L13a, putative                      | -0,2633 | 0,000252 |
| TcCLB.506825.190 | hypothetical protein                                      | -0,2633 | 0,01952  |

|                  |                                                              |         |          |
|------------------|--------------------------------------------------------------|---------|----------|
| TcCLB.506473.20  | DnaJ chaperone protein, putative                             | -0,2633 | 0,02828  |
| TcCLB.511417.120 | DNA repair protein BRCA2 (pseudogene), putative              | -0,2633 | 0,04379  |
| TcCLB.511423.160 | RWD domain-containing protein                                | -0,2634 | 0,1565   |
| TcCLB.510299.60  | hypothetical protein, conserved                              | -0,2635 | 0,1833   |
| TcCLB.509637.27  | hypothetical protein, conserved                              | -0,2637 | 0,09945  |
| TcCLB.506529.14  | hypothetical protein, conserved                              | -0,2637 | 0,1624   |
| TcCLB.506445.121 | heat shock protein DNAJ, putative (fragment)                 | -0,2638 | 0,3042   |
| TcCLB.509671.164 | hypothetical protein, conserved                              | -0,2639 | 0,1037   |
| TcCLB.509029.110 | hypothetical protein, conserved                              | -0,264  | 0,04601  |
| TcCLB.504203.29  | tRNA-dihydrouridine synthase 2, putative                     | -0,2641 | 0,2083   |
| TcCLB.511491.80  | mitogen-activated protein kinase, putative                   | -0,2642 | 0,04465  |
| TcCLB.507257.60  | Fumarate hydratase class I, cytosolic (FHc)                  | -0,2642 | 0,1037   |
| TcCLB.503823.100 | hypothetical protein, conserved                              | -0,2643 | 0,08625  |
| TcCLB.509053.90  | hypothetical protein, conserved                              | -0,2644 | 0,08487  |
| TcCLB.509965.130 | hypothetical protein, conserved                              | -0,2644 | 0,2433   |
| TcCLB.508553.20  | hypothetical protein                                         | -0,2645 | 0,5753   |
| TcCLB.504147.150 | ATP-dependent DEAD/H RNA helicase, putative                  | -0,2646 | 0,002263 |
| TcCLB.507101.20  | hypothetical protein (pseudogene)                            | -0,2646 | 0,3743   |
| TcCLB.511903.240 | hypothetical protein, conserved                              | -0,2647 | 0,03143  |
| TcCLB.511761.30  | hypothetical protein, conserved                              | -0,2647 | 0,1171   |
| TcCLB.507603.20  | translation initiation factor EIF-2b alpha subunit, putative | -0,2648 | 0,1405   |
| TcCLB.508355.170 | hypothetical protein, conserved                              | -0,2649 | 0,02705  |
| TcCLB.505931.10  | surface protease GP63, putative                              | -0,2649 | 0,132    |
| TcCLB.503917.35  | B9 domain-containing protein 2 (b9d2)                        | -0,2649 | 0,2345   |
| TcCLB.510685.30  | RNA polymerase IIA largest subunit, putative                 | -0,265  | 0,01509  |
| TcCLB.510329.270 | Fumarate hydratase class I, cytosolic (FHc)                  | -0,265  | 0,1887   |
| TcCLB.508269.50  | hypothetical protein, conserved                              | -0,2651 | 0,01546  |
| TcCLB.510625.40  | trans-sialidase, Group V, putative                           | -0,2651 | 0,5135   |
| TcCLB.506195.70  | PrimPol-like protein 2, putative (ppl2)                      | -0,2653 | 0,02621  |
| TcCLB.405737.14  | hypothetical protein                                         | -0,2655 | 0,1227   |
| TcCLB.511419.60  | NADH-ubiquinone oxidoreductase complex I subunit, putative   | -0,2656 | 0,06001  |
| TcCLB.504171.10  | hypothetical protein, conserved                              | -0,2656 | 0,1371   |
| TcCLB.506741.90  | mucin-associated surface protein (MASP), putative            | -0,2656 | 0,4061   |
| TcCLB.506885.480 | trans-sialidase, Group V, putative                           | -0,2657 | 0,4047   |
| TcCLB.506473.6   | hypothetical protein, conserved                              | -0,2659 | 0,05741  |
| TcCLB.511003.210 | hypothetical protein, conserved                              | -0,2659 | 0,08677  |
| TcCLB.508895.70  | membrane protein, putative                                   | -0,266  | 0,1332   |
| TcCLB.508257.200 | hypothetical protein, conserved                              | -0,2662 | 0,007328 |
| TcCLB.503885.90  | hypothetical protein, conserved                              | -0,2662 | 0,01573  |
| TcCLB.509639.10  | procyclic form surface phosphoprotein, putative              | -0,2662 | 0,08377  |
| TcCLB.510227.29  | thioredoxin, putative (fragment)                             | -0,2663 | 0,003378 |
| TcCLB.511727.280 | hypothetical protein, conserved                              | -0,2663 | 0,004394 |
| TcCLB.510265.40  | hypothetical protein, conserved                              | -0,2663 | 0,005731 |
| TcCLB.506859.160 | hypothetical protein, conserved                              | -0,2663 | 0,01426  |
| TcCLB.508745.11  | trans-sialidase, putative (fragment)                         | -0,2663 | 0,5447   |



|                  |                                                           |         |          |
|------------------|-----------------------------------------------------------|---------|----------|
| TcCLB.509805.100 | hypothetical protein, conserved                           | -0,2664 | 0,01326  |
| TcCLB.510659.170 | denn domain-containing protein                            | -0,2664 | 0,08479  |
| TcCLB.511255.160 | trans-sialidase (pseudogene), putative                    | -0,2664 | 0,5846   |
| TcCLB.503841.20  | AMPK subunit gamma (AMPKG)                                | -0,2665 | 0,03285  |
| TcCLB.506503.100 | U3 snoRNA-associated protein UTP11, putative              | -0,2665 | 0,09206  |
| TcCLB.511717.70  | hypothetical protein, conserved                           | -0,2666 | 0,08104  |
| TcCLB.510575.100 | hypothetical protein, conserved                           | -0,2668 | 0,09148  |
| TcCLB.508577.120 | hypothetical protein, conserved                           | -0,2668 | 0,1264   |
| TcCLB.506587.10  | hypothetical protein, conserved                           | -0,2668 | 0,1732   |
| TcCLB.503771.40  | syntaxin binding protein (pseudogene), putative           | -0,2668 | 0,5899   |
| TcCLB.508627.21  | retrotransposon hot spot protein (RHS, pseudogene), putat | -0,2669 | 0,3818   |
| TcCLB.506781.50  | dispersed gene family protein 1 (DGF-1), putative         | -0,2669 | 0,4128   |
| TcCLB.511667.10  | hypothetical protein, conserved                           | -0,267  | 0,5367   |
| TcCLB.506855.110 | hypothetical protein, conserved                           | -0,2671 | 0,03333  |
| TcCLB.503989.60  | protein phosphatase 2C, putative (fragment)               | -0,2671 | 0,1565   |
| TcCLB.508173.120 | trans-sialidase, Group I, putative                        | -0,2672 | 0,002853 |
| TcCLB.503897.40  | hypothetical protein, conserved                           | -0,2672 | 0,01546  |
| TcCLB.507743.9   | tyrosine protein kinase, putative                         | -0,2672 | 0,04191  |
| TcCLB.510969.20  | hypothetical protein, conserved                           | -0,2673 | 0,08396  |
| TcCLB.506351.60  | hypothetical protein, conserved                           | -0,2675 | 0,06276  |
| TcCLB.507771.99  | hypothetical protein, conserved                           | -0,2675 | 0,2455   |
| TcCLB.447255.29  | multidrug resistance-associated protein, putative         | -0,2675 | 0,2722   |
| TcCLB.510943.110 | hypothetical protein, conserved                           | -0,2676 | 0,02829  |
| TcCLB.511317.20  | hypothetical protein, conserved                           | -0,2678 | 0,04662  |
| TcCLB.505999.40  | DNA repair protein BRCA2, putative                        | -0,2678 | 0,06745  |
| TcCLB.510025.160 | mucin-associated surface protein (MASP), putative         | -0,2678 | 0,6195   |
| TcCLB.503461.40  | succinyl-CoA:3-ketoacid-coenzyme-A transferase (pseudog   | -0,268  | 0,4202   |
| TcCLB.504057.11  | phospholipid-translocating ATPase, putative               | -0,2681 | 0,006043 |
| TcCLB.504221.20  | 26S proteasome regulatory non-ATPase subunit, putative    | -0,2681 | 0,02449  |
| TcCLB.511231.30  | hypothetical protein, conserved                           | -0,2682 | 0,0461   |
| TcCLB.508431.80  | trans-sialidase (pseudogene), putative                    | -0,2682 | 0,3906   |
| TcCLB.508761.40  | trans-sialidase, Group V, putative                        | -0,2682 | 0,4279   |
| TcCLB.511361.60  | hypothetical protein                                      | -0,2683 | 0,0253   |
| TcCLB.507957.160 | mucin-associated surface protein (MASP), putative         | -0,2683 | 0,5096   |
| TcCLB.503671.10  | Aminopeptidase M1, putative (fragment)                    | -0,2684 | 0,04172  |
| TcCLB.506559.80  | Sir2-related protein 3, putative (SIR2rp3)                | -0,2684 | 0,1332   |
| TcCLB.506415.10  | dispersed gene family protein 1 (DGF-1), putative         | -0,2685 | 0,006563 |
| TcCLB.505807.60  | hypothetical protein, conserved                           | -0,2685 | 0,01596  |
| TcCLB.507541.10  | hypothetical protein, conserved                           | -0,2685 | 0,2063   |
| TcCLB.504881.10  | hypothetical protein, conserved                           | -0,2686 | 0,04913  |
| TcCLB.503923.10  | hypothetical protein, conserved                           | -0,2686 | 0,05561  |
| TcCLB.509157.210 | hypothetical protein, conserved                           | -0,2686 | 0,2698   |
| TcCLB.503809.68  | glycerol uptake protein (pseudogene), putative            | -0,2687 | 0,407    |
| TcCLB.506625.220 | hypothetical protein, conserved                           | -0,2688 | 0,03666  |
| TcCLB.511109.110 | hypothetical protein, conserved                           | -0,2688 | 0,2513   |

|                  |                                                              |         |           |
|------------------|--------------------------------------------------------------|---------|-----------|
| TcCLB.510769.140 | hypothetical protein, conserved                              | -0,2689 | 0,07392   |
| TcCLB.503935.4   | hypothetical protein, conserved (pseudogene)                 | -0,2689 | 0,2039    |
| TcCLB.507357.20  | hypothetical protein                                         | -0,2689 | 0,5018    |
| TcCLB.508989.90  | Eukaryotic translation initiation factor 4 gamma type 5, pu  | -0,269  | 0,001728  |
| TcCLB.503835.10  | hypothetical protein, conserved                              | -0,2691 | 0,1949    |
| TcCLB.506677.4   | hypothetical protein, conserved                              | -0,2691 | 0,5695    |
| TcCLB.504243.49  | hypothetical protein, conserved (fragment)                   | -0,2692 | 0,07249   |
| TcCLB.510359.310 | eukaryotic translation initiation factor 2 subunit, putative | -0,2693 | 0,006415  |
| TcCLB.509807.20  | hypothetical protein, conserved                              | -0,2694 | 0,02719   |
| TcCLB.508695.20  | phosphatidylinositol 4-kinase, putative                      | -0,2696 | 0,02299   |
| TcCLB.503863.9   | hypothetical protein, conserved                              | -0,2696 | 0,1125    |
| TcCLB.503881.39  | ribosomal protein L38, putative                              | -0,2698 | 0,02749   |
| TcCLB.506247.460 | hypothetical protein, conserved                              | -0,27   | 0,05933   |
| TcCLB.508153.110 | hypothetical protein                                         | -0,2701 | 0,1502    |
| TcCLB.509081.60  | syntaxin binding protein (pseudogene), putative              | -0,2701 | 0,4048    |
| TcCLB.508891.40  | hypothetical protein, conserved                              | -0,2702 | 0,04454   |
| TcCLB.506625.90  | hypothetical protein, conserved                              | -0,2702 | 0,1206    |
| TcCLB.511727.30  | hypothetical protein, conserved                              | -0,2703 | 0,005359  |
| TcCLB.506249.40  | hypothetical protein, conserved                              | -0,2703 | 0,03874   |
| TcCLB.508429.40  | mucin-associated surface protein (MASP, pseudogene), pu      | -0,2703 | 0,6039    |
| TcCLB.504069.53  | proteasome subunit alpha type-5, putative                    | -0,2705 | 0,005385  |
| TcCLB.503449.40  | hypothetical protein, conserved                              | -0,2706 | 0,08196   |
| TcCLB.509551.80  | hypothetical protein, conserved                              | -0,2706 | 0,1064    |
| TcCLB.508479.150 | serine/threonine protein kinase, putative                    | -0,2707 | 0,00652   |
| TcCLB.503579.50  | hypothetical protein, conserved                              | -0,2707 | 0,007331  |
| TcCLB.507257.100 | hypothetical protein, conserved                              | -0,2707 | 0,05809   |
| TcCLB.508899.10  | proteasome regulatory non-ATP-ase subunit 9, putative (fr    | -0,2707 | 0,0784    |
| TcCLB.507709.30  | hypothetical protein, conserved                              | -0,2707 | 0,1041    |
| TcCLB.479961.20  | retrotransposon hot spot protein (RHS, pseudogene), putat    | -0,2707 | 0,1828    |
| TcCLB.510431.180 | Present in the outer mitochondrial membrane proteome 1:      | -0,2708 | 0,03725   |
| TcCLB.508133.19  | hypothetical protein, conserved                              | -0,2708 | 0,1051    |
| TcCLB.511381.40  | DNA-directed rna polymerase I largest subunit, putative      | -0,2709 | 0,001949  |
| TcCLB.510655.140 | hypothetical protein, conserved                              | -0,2709 | 0,0608    |
| TcCLB.510659.230 | hypothetical protein, conserved                              | -0,2709 | 0,1135    |
| TcCLB.505989.110 | amidinotransferase, putative                                 | -0,271  | 0,0003939 |
| TcCLB.510363.160 | mucin-associated surface protein (MASP, pseudogene), pu      | -0,271  | 0,4491    |
| TcCLB.508693.90  | peroxisome biogenesis factor 1, putative                     | -0,2711 | 0,004224  |
| TcCLB.508219.110 | mucin-associated surface protein (MASP), putative            | -0,2712 | 0,4941    |
| TcCLB.503419.54  | hypothetical protein, conserved                              | -0,2713 | 0,1503    |
| TcCLB.511727.300 | GDP-L-fucose synthetase, putative                            | -0,2715 | 0,01736   |
| TcCLB.506367.80  | hypothetical protein                                         | -0,2715 | 0,2692    |
| TcCLB.508307.130 | hypothetical protein, conserved                              | -0,2716 | 0,02708   |
| TcCLB.504827.70  | hypothetical protein, conserved                              | -0,2716 | 0,09897   |
| TcCLB.510357.90  | hypothetical protein, conserved                              | -0,2716 | 0,1392    |
| TcCLB.506557.20  | hypothetical protein, conserved                              | -0,2717 | 0,0252    |

|                  |                                                                 |         |          |
|------------------|-----------------------------------------------------------------|---------|----------|
| TcCLB.509073.90  | hypothetical protein, conserved                                 | -0,2718 | 0,02456  |
| TcCLB.508317.30  | hypothetical protein                                            | -0,2719 | 0,01033  |
| TcCLB.506813.160 | dispersed gene family protein 1 (DGF-1, pseudogene), putative   | -0,272  | 0,3337   |
| TcCLB.508209.110 | hypothetical protein, conserved                                 | -0,2721 | 0,005774 |
| TcCLB.410923.20  | retrotransposon hot spot (RHS) protein, putative                | -0,2721 | 0,1081   |
| TcCLB.510463.240 | mucin-associated surface protein (MASP), putative               | -0,2721 | 0,6092   |
| TcCLB.511249.80  | hypothetical protein, conserved                                 | -0,2722 | 0,01226  |
| TcCLB.507521.110 | pumilio/PUF RNA binding protein 5, putative (PUF5)              | -0,2722 | 0,02312  |
| TcCLB.508795.10  | SNF2/RAD54 related DNA helicase (pseudogene), putative          | -0,2723 | 0,1563   |
| TcCLB.510699.100 | hypothetical protein                                            | -0,2723 | 0,5147   |
| TcCLB.511389.130 | diphthine synthase, putative                                    | -0,2726 | 0,08867  |
| TcCLB.511803.50  | hypothetical protein, conserved                                 | -0,2726 | 0,1005   |
| TcCLB.509047.80  | mitochondrial oligo_U binding protein TBRGG1 (pseudogene)       | -0,2727 | 0,01509  |
| TcCLB.507639.100 | phosphatidylinositol N-acetylglucosaminyltransferase subunit    | -0,2727 | 0,1761   |
| TcCLB.506673.69  | hypothetical protein, conserved                                 | -0,2727 | 0,1859   |
| TcCLB.506817.79  | kinteoplast poly(A) polymerase complex 1 subunit, putative      | -0,2727 | 0,2084   |
| TcCLB.505773.10  | retrotransposon hot spot protein (RHS, pseudogene), putative    | -0,2727 | 0,2132   |
| TcCLB.506559.230 | hypothetical protein, conserved                                 | -0,2727 | 0,2248   |
| TcCLB.506955.115 | surface protease GP63 (pseudogene), putative                    | -0,2727 | 0,599    |
| TcCLB.509399.120 | hypothetical protein, conserved                                 | -0,2728 | 0,01247  |
| TcCLB.510533.100 | hypothetical protein, conserved                                 | -0,2728 | 0,1365   |
| TcCLB.504247.30  | transcription elongation factor 1 homolog (ELOF1)               | -0,2728 | 0,1563   |
| TcCLB.507663.9   | hypothetical protein, conserved                                 | -0,2728 | 0,2483   |
| TcCLB.510697.60  | mucin-associated surface protein (MASP), putative               | -0,2728 | 0,3901   |
| TcCLB.504147.310 | hypothetical protein, conserved                                 | -0,2729 | 0,01113  |
| TcCLB.508577.100 | pumilio/PUF RNA binding protein 5, putative (PUF5)              | -0,2729 | 0,05568  |
| TcCLB.507511.81  | mucin TcMUCII, putative                                         | -0,2731 | 0,08341  |
| TcCLB.508999.80  | mucin-associated surface protein (MASP), putative               | -0,2731 | 0,6551   |
| TcCLB.511767.20  | dispersed gene family protein 1 (DGF-1), putative               | -0,2732 | 0,1535   |
| TcCLB.507521.30  | hypothetical protein, conserved                                 | -0,2732 | 0,1909   |
| TcCLB.420989.10  | protein phosphatase 2C, putative                                | -0,2732 | 0,3657   |
| TcCLB.507771.60  | hypothetical protein, conserved                                 | -0,2733 | 0,01105  |
| TcCLB.508305.30  | hypothetical protein                                            | -0,2733 | 0,7037   |
| TcCLB.507941.10  | hypothetical protein, conserved                                 | -0,2734 | 0,008033 |
| TcCLB.506545.10  | hypothetical protein                                            | -0,2735 | 0,02402  |
| TcCLB.510175.60  | dispersed gene family protein 1 (DGF-1), putative               | -0,2735 | 0,1      |
| TcCLB.508027.70  | ATP-dependent RNA helicase, putative                            | -0,2736 | 0,01181  |
| TcCLB.509167.140 | RNA-binding protein 42 (RNA-binding motif protein 42), putative | -0,2736 | 0,02017  |
| TcCLB.506139.140 | trans-sialidase (pseudogene), putative                          | -0,2736 | 0,4983   |
| TcCLB.510893.9   | dispersed gene family protein 1 (DGF-1, pseudogene), putative   | -0,2737 | 0,3781   |
| TcCLB.511183.190 | trans-sialidase, Group V, putative                              | -0,2738 | 0,4749   |
| TcCLB.511075.20  | notchless homolog, putative                                     | -0,274  | 0,01009  |
| TcCLB.504643.10  | kinesin (pseudogene), putative                                  | -0,2741 | 0,01276  |
| TcCLB.508295.30  | mucin TcMUCII, putative                                         | -0,2741 | 0,5717   |
| TcCLB.506425.60  | hypothetical protein, conserved                                 | -0,2742 | 0,05363  |

|                  |                                                              |         |           |
|------------------|--------------------------------------------------------------|---------|-----------|
| TcCLB.507841.30  | hypothetical protein, conserved                              | -0,2742 | 0,2613    |
| TcCLB.506573.34  | hypothetical protein, conserved                              | -0,2742 | 0,4079    |
| TcCLB.508737.154 | hypothetical protein, conserved                              | -0,2745 | 0,2197    |
| TcCLB.506925.440 | Nuclear pore complex protein 158 (pseudogene)                | -0,2746 | 0,0002553 |
| TcCLB.507257.50  | hypothetical protein, conserved                              | -0,2746 | 0,0004807 |
| TcCLB.509179.210 | hypothetical protein, conserved                              | -0,2746 | 0,06108   |
| TcCLB.511717.190 | hypothetical protein, conserved                              | -0,2746 | 0,08182   |
| TcCLB.503929.60  | hypothetical protein, conserved                              | -0,2746 | 0,1125    |
| TcCLB.509985.69  | hypothetical protein, conserved                              | -0,2748 | 0,2808    |
| TcCLB.510661.260 | hypothetical protein, conserved                              | -0,2749 | 0,007487  |
| TcCLB.508397.10  | V-type proton ATPase subunit D, putative (VAd)               | -0,2749 | 0,03137   |
| TcCLB.509053.130 | DnaJ chaperone protein, putative                             | -0,2749 | 0,1171    |
| TcCLB.511171.10  | dispersed gene family protein 1 (DGF-1), putative            | -0,2749 | 0,6012    |
| TcCLB.506795.50  | poly(A) polymerase, putative                                 | -0,2752 | 0,008296  |
| TcCLB.509429.90  | translation initiation factor EIF-2b alpha subunit, putative | -0,2752 | 0,0905    |
| TcCLB.506513.30  | hypothetical protein, conserved                              | -0,2752 | 0,1646    |
| TcCLB.506177.10  | hypothetical protein, conserved                              | -0,2753 | 0,03205   |
| TcCLB.510719.140 | hypothetical protein, conserved                              | -0,2753 | 0,04219   |
| TcCLB.509581.10  | trans-sialidase, Group VII, putative                         | -0,2754 | 0,7084    |
| TcCLB.508741.370 | hypothetical protein, conserved                              | -0,2755 | 0,0004805 |
| TcCLB.507013.24  | poly(ADP-ribose) glycohydrolase, putative                    | -0,2755 | 0,07487   |
| TcCLB.507009.70  | hypothetical protein, conserved                              | -0,2757 | 0,02935   |
| TcCLB.508197.30  | hypothetical protein, conserved                              | -0,2758 | 0,007394  |
| TcCLB.508277.80  | hypothetical protein, conserved                              | -0,276  | 0,05903   |
| TcCLB.506265.160 | hypothetical protein, conserved                              | -0,276  | 0,1613    |
| TcCLB.503679.40  | actin-related protein 2, putative                            | -0,276  | 0,417     |
| TcCLB.503669.39  | hypothetical protein, conserved (fragment)                   | -0,2761 | 0,3509    |
| TcCLB.510287.30  | proteasome subunit beta type-2, putative                     | -0,2762 | 0,03648   |
| TcCLB.445011.10  | hypothetical protein, conserved                              | -0,2762 | 0,08542   |
| TcCLB.504013.90  | hypothetical protein, conserved                              | -0,2763 | 0,004927  |
| TcCLB.508989.20  | carrier protein, putative                                    | -0,2764 | 0,08592   |
| TcCLB.504261.20  | trans-sialidase, Group VI, putative                          | -0,2765 | 0,4502    |
| TcCLB.507709.44  | hypothetical protein, conserved                              | -0,2766 | 0,04267   |
| TcCLB.506337.171 | ubiquitin (pseudogene), putative                             | -0,2766 | 0,2628    |
| TcCLB.503781.20  | phosphatidylinositol N-acetylglucosaminyltransferase subu    | -0,2767 | 0,09975   |
| TcCLB.506925.290 | hypothetical protein                                         | -0,2768 | 0,01507   |
| TcCLB.511165.70  | proteasome alpha 7 subunit, putative                         | -0,2768 | 0,02657   |
| TcCLB.509003.10  | hypothetical protein, conserved                              | -0,2769 | 0,003542  |
| TcCLB.508213.9   | regulator of chromosome condensation, putative               | -0,2771 | 0,009382  |
| TcCLB.506419.20  | tousled-like kinase II, putative                             | -0,2771 | 0,03795   |
| TcCLB.510259.6   | DNA polymerase delta catalytic subunit, putative (fragmer    | -0,2774 | 0,01159   |
| TcCLB.510745.40  | protein kinase, putative                                     | -0,2774 | 0,02972   |
| TcCLB.504949.30  | succinate dehydrogenase iron-sulfur subunit (SDH2C)          | -0,2774 | 0,06599   |
| TcCLB.511277.310 | hypothetical protein, conserved                              | -0,2775 | 0,01917   |
| TcCLB.506619.10  | sedoheptulose-1,7-bisphosphatase, putative                   | -0,2776 | 0,0706    |

|                  |                                                       |         |           |
|------------------|-------------------------------------------------------|---------|-----------|
| TcCLB.511737.80  | hypothetical protein                                  | -0,2777 | 0,08124   |
| TcCLB.507513.10  | hypothetical protein, conserved                       | -0,2778 | 0,03569   |
| TcCLB.511751.163 | hypothetical protein, conserved                       | -0,2778 | 0,05455   |
| TcCLB.506529.170 | hypothetical protein, conserved                       | -0,2778 | 0,09383   |
| TcCLB.509937.30  | phosphatidylserine synthase, putative                 | -0,278  | 0,06502   |
| TcCLB.509527.80  | mucin-associated surface protein (MASP), putative     | -0,2781 | 0,4202    |
| TcCLB.509161.30  | OSM3-like kinesin, putative                           | -0,2782 | 0,001076  |
| TcCLB.508895.60  | RNA-binding protein, putative                         | -0,2784 | 0,01346   |
| TcCLB.506287.140 | prefoldin, putative                                   | -0,2784 | 0,05127   |
| TcCLB.507257.140 | hypothetical protein, conserved                       | -0,2784 | 0,07482   |
| TcCLB.505207.10  | trans-sialidase, Group VII, putative                  | -0,2784 | 0,2876    |
| TcCLB.503887.30  | hypothetical protein, conserved                       | -0,2785 | 0,02189   |
| TcCLB.508461.560 | hypothetical protein, conserved                       | -0,2787 | 0,03972   |
| TcCLB.506829.100 | fatty acyl CoA syntetase 1, putative                  | -0,2788 | 0,003911  |
| TcCLB.506857.40  | hypothetical protein, conserved                       | -0,2788 | 0,1162    |
| TcCLB.508707.70  | hypothetical protein, conserved                       | -0,2789 | 0,0007393 |
| TcCLB.509165.49  | damage-specific DNA binding protein, putative         | -0,2789 | 0,04489   |
| TcCLB.510699.11  | surface protease GP63 (pseudogene), putative          | -0,2789 | 0,6179    |
| TcCLB.506147.160 | hypothetical protein, conserved                       | -0,279  | 0,08689   |
| TcCLB.445011.19  | hypothetical protein, conserved                       | -0,279  | 0,09199   |
| TcCLB.510209.27  | mucin-associated surface protein (MASP), putative     | -0,279  | 0,5993    |
| TcCLB.510749.74  | hypothetical protein, conserved                       | -0,2791 | 0,03191   |
| TcCLB.507063.80  | hypothetical protein, conserved                       | -0,2791 | 0,06433   |
| TcCLB.510879.30  | hypothetical protein, conserved                       | -0,2793 | 0,006762  |
| TcCLB.511245.50  | hypothetical protein, conserved                       | -0,2794 | 0,003004  |
| TcCLB.506985.10  | hypothetical protein, conserved                       | -0,2795 | 0,1124    |
| TcCLB.503395.10  | hypothetical protein, conserved                       | -0,2795 | 0,254     |
| TcCLB.506493.60  | hypothetical protein, conserved                       | -0,2796 | 0,01984   |
| TcCLB.506341.50  | trans-sialidase, Group VIII, putative                 | -0,2796 | 0,2609    |
| TcCLB.510201.10  | trans-sialidase, Group V, putative                    | -0,2796 | 0,3647    |
| TcCLB.506121.9   | dispersed gene family protein 1 (DGF-1), putative     | -0,2796 | 0,4827    |
| TcCLB.506871.180 | G5-interacting protein, putative (G5-IP)              | -0,2797 | 0,007198  |
| TcCLB.509109.40  | hypothetical protein, conserved                       | -0,2797 | 0,07867   |
| TcCLB.506393.166 | ATP-dependent DEAD/H RNA helicase (pseudogene), putat | -0,2798 | 0,4831    |
| TcCLB.511071.130 | Trypanosome basal body component protein (TBBC)       | -0,2799 | 0,001376  |
| TcCLB.509195.50  | mucin-associated surface protein (MASP), putative     | -0,2799 | 0,4619    |
| TcCLB.506983.10  | hypothetical protein, conserved                       | -0,28   | 0,08983   |
| TcCLB.511003.70  | hypothetical protein, conserved                       | -0,28   | 0,1377    |
| TcCLB.403875.10  | cysteine peptidase, Clan CA, family C51, putative     | -0,2801 | 0,01259   |
| TcCLB.506305.5   | hypothetical protein, conserved                       | -0,2802 | 0,1367    |
| TcCLB.504121.10  | KU70 protein, putative                                | -0,2803 | 0,08659   |
| TcCLB.506703.110 | mucin-associated surface protein (MASP), putative     | -0,2803 | 0,2967    |
| TcCLB.506131.10  | mucin TcMUCII, putative                               | -0,2803 | 0,6405    |
| TcCLB.511671.120 | U5 snRNP-specific 40 kDa protein, putative            | -0,2805 | 0,07414   |
| TcCLB.507389.79  | hypothetical protein, conserved                       | -0,2805 | 0,128     |

|                  |                                                              |         |          |
|------------------|--------------------------------------------------------------|---------|----------|
| TcCLB.507913.20  | phosphomevalonate kinase protein, putative                   | -0,2807 | 0,04383  |
| TcCLB.511543.20  | As/Sb Reductase, putative (ACR2)                             | -0,2808 | 0,2267   |
| TcCLB.509437.80  | hypothetical protein, conserved                              | -0,2809 | 0,07062  |
| TcCLB.510757.20  | hypothetical protein, conserved                              | -0,2811 | 0,05653  |
| TcCLB.509823.4   | hypothetical protein, conserved                              | -0,2812 | 0,05882  |
| TcCLB.508821.10  | katanin, putative                                            | -0,2812 | 0,14     |
| TcCLB.511725.270 | hypothetical protein, conserved                              | -0,2813 | 0,001687 |
| TcCLB.508919.90  | hypothetical protein, conserved                              | -0,2813 | 0,1138   |
| TcCLB.506583.4   | serine/threonine protein kinase, putative                    | -0,2813 | 0,1346   |
| TcCLB.508545.20  | hypothetical protein, conserved                              | -0,2814 | 0,2413   |
| TcCLB.508329.9   | potassium voltage-gated channel, putative                    | -0,2814 | 0,536    |
| TcCLB.506489.59  | divalent cation tolerance protein, putative                  | -0,2815 | 0,3234   |
| TcCLB.510187.190 | vacuolar protein sorting-associated protein, putative        | -0,2816 | 0,002581 |
| TcCLB.507037.80  | hypothetical protein, conserved                              | -0,2816 | 0,0347   |
| TcCLB.510741.100 | hypothetical protein, conserved                              | -0,2816 | 0,06649  |
| TcCLB.509199.10  | Elongation factor G 2, mitochondrial, putative (EF-G2)       | -0,2817 | 0,01219  |
| TcCLB.506245.73  | elongation factor 1-gamma (EF-1-gamma, pseudogene), p        | -0,2817 | 0,5958   |
| TcCLB.503983.29  | hypothetical protein, conserved                              | -0,2818 | 0,1798   |
| TcCLB.511061.51  | mucin-associated surface protein (MASP), putative            | -0,282  | 0,4173   |
| TcCLB.507787.120 | hypothetical protein, conserved                              | -0,2821 | 0,1755   |
| TcCLB.511449.70  | trans-sialidase, Group V, putative                           | -0,2821 | 0,459    |
| TcCLB.506175.10  | hypothetical protein, conserved                              | -0,2822 | 0,044    |
| TcCLB.510729.299 | protein kinase, putative                                     | -0,2822 | 0,1878   |
| TcCLB.508637.120 | hypothetical protein, conserved                              | -0,2823 | 0,04466  |
| TcCLB.511599.120 | mucin-associated surface protein (MASP), putative            | -0,2823 | 0,5312   |
| TcCLB.508623.10  | trans-sialidase (pseudogene), putative                       | -0,2824 | 0,00393  |
| TcCLB.508247.19  | syntaxin binding protein 1 (pseudogene), putative            | -0,2824 | 0,5299   |
| TcCLB.503851.40  | hypothetical protein, conserved                              | -0,2826 | 0,04149  |
| TcCLB.503669.20  | hypothetical protein, conserved                              | -0,2826 | 0,08155  |
| TcCLB.432867.10  | hypothetical protein, conserved (fragment)                   | -0,2827 | 0,07744  |
| TcCLB.507517.130 | RNA editing 3' terminal uridylyl transferase 2, putative (RE | -0,2828 | 0,08272  |
| TcCLB.434945.4   | ADP-ribosylation factor, putative                            | -0,283  | 0,04102  |
| TcCLB.511109.90  | DnaJ chaperone protein, putative                             | -0,283  | 0,07617  |
| TcCLB.506959.100 | GTP-ase activating protein, putative                         | -0,2831 | 0,0632   |
| TcCLB.510879.229 | protein kinase, putative                                     | -0,2832 | 0,2658   |
| TcCLB.506973.70  | dispersed gene family protein 1 (DGF-1), putative            | -0,2832 | 0,6091   |
| TcCLB.507779.30  | dispersed gene family protein 1 (DGF-1), putative            | -0,2833 | 0,1025   |
| TcCLB.507159.10  | Wee1-like protein kinase, putative (pseudogene, point mut    | -0,2834 | 0,07413  |
| TcCLB.510729.160 | hypothetical protein, conserved                              | -0,2835 | 0,01248  |
| TcCLB.511511.80  | tubulin-tyrosine ligase-like protein, putative               | -0,2835 | 0,03356  |
| TcCLB.511927.20  | hypothetical protein, conserved                              | -0,2835 | 0,1488   |
| TcCLB.506755.5   | hypothetical protein, conserved                              | -0,2835 | 0,3333   |
| TcCLB.507047.70  | hypothetical protein, conserved                              | -0,2836 | 0,2064   |
| TcCLB.509747.100 | hypothetical protein, conserved                              | -0,2837 | 0,001732 |
| TcCLB.506175.100 | hypothetical protein, conserved                              | -0,2837 | 0,01396  |

|                  |                                                         |         |            |
|------------------|---------------------------------------------------------|---------|------------|
| TcCLB.507549.20  | trans-sialidase (pseudogene), putative                  | -0,2837 | 0,1524     |
| TcCLB.510293.50  | DnaJ chaperone protein, putative                        | -0,2838 | 0,01812    |
| TcCLB.509647.150 | calcium-transporting ATPase, putative                   | -0,2839 | 0,000473   |
| TcCLB.506155.120 | glycosyl hydrolase, putative                            | -0,2839 | 0,01228    |
| TcCLB.504171.30  | hypothetical protein, conserved                         | -0,284  | 0,01127    |
| TcCLB.509937.180 | tyrosyl-tRNA synthetase, putative                       | -0,2841 | 0,006489   |
| TcCLB.506331.120 | trans-sialidase (pseudogene), putative                  | -0,2841 | 0,2596     |
| TcCLB.503837.40  | hypothetical protein, conserved                         | -0,2843 | 0,2774     |
| TcCLB.506503.120 | hypothetical protein, conserved                         | -0,2847 | 0,0003285  |
| TcCLB.509119.39  | dynein heavy chain, putative                            | -0,2848 | 0,198      |
| TcCLB.510391.10  | dispersed gene family protein 1 (DGF-1), putative       | -0,2848 | 0,3524     |
| TcCLB.506565.8   | RNA-binding protein, putative                           | -0,285  | 0,006773   |
| TcCLB.511109.80  | hypothetical protein, conserved                         | -0,285  | 0,1479     |
| TcCLB.503999.70  | ras-family member, GTP-binding protein, putative        | -0,2851 | 0,01352    |
| TcCLB.503689.20  | hypothetical protein, conserved                         | -0,2851 | 0,3413     |
| TcCLB.511183.116 | trans-sialidase (pseudogene), putative                  | -0,2851 | 0,4857     |
| TcCLB.506591.90  | hypothetical protein, conserved                         | -0,2851 | 0,6618     |
| TcCLB.504155.293 | mucin-associated surface protein (MASP), putative       | -0,2851 | 0,7431     |
| TcCLB.509777.90  | hypothetical protein, conserved                         | -0,2854 | 0,0207     |
| TcCLB.506241.80  | hypothetical protein, conserved                         | -0,2854 | 0,0795     |
| TcCLB.509965.420 | hypothetical protein, conserved                         | -0,2855 | 0,04259    |
| TcCLB.508163.330 | surface protease GP63, putative                         | -0,2855 | 0,5711     |
| TcCLB.511617.9   | NUP-1 protein (pseudogene), putative                    | -0,2857 | 0,00001108 |
| TcCLB.503991.30  | hypothetical protein, conserved                         | -0,2857 | 0,0166     |
| TcCLB.508789.130 | surface protease GP63 (pseudogene), putative            | -0,2857 | 0,5078     |
| TcCLB.506781.19  | mucin-associated surface protein (MASP), putative       | -0,2857 | 0,6027     |
| TcCLB.482369.10  | protein phosphatase 2A regulatory subunit, putative     | -0,2858 | 0,01195    |
| TcCLB.506729.9   | heat shock 70 kDa protein, putative (fragment)          | -0,2858 | 0,1677     |
| TcCLB.511001.18  | 40S ribosomal protein S3A, putative                     | -0,286  | 0,1355     |
| TcCLB.509947.20  | mucin-associated surface protein (MASP, pseudogene), pu | -0,286  | 0,7037     |
| TcCLB.503515.20  | Kinetoplastid RNA editing protein 1, putative (KREPA1)  | -0,2863 | 0,006017   |
| TcCLB.506475.50  | Replication Factor C Subunit 1-related protein          | -0,2863 | 0,02638    |
| TcCLB.506227.130 | calpain-like cysteine peptidase, putative               | -0,2864 | 0,007694   |
| TcCLB.506127.70  | hypothetical protein                                    | -0,2864 | 0,01485    |
| TcCLB.508789.220 | mucin TcMUCII, putative                                 | -0,2864 | 0,5689     |
| TcCLB.506885.20  | hypothetical protein, conserved                         | -0,2865 | 0,008001   |
| TcCLB.508573.80  | trans-sialidase (pseudogene), putative                  | -0,2865 | 0,1763     |
| TcCLB.509099.70  | endo/exonuclease Mre11, putative                        | -0,2866 | 0,004139   |
| TcCLB.503685.10  | serine/threonine-protein kinase, putative               | -0,2866 | 0,06228    |
| TcCLB.511423.110 | hypothetical protein, conserved                         | -0,2867 | 0,04831    |
| TcCLB.509799.90  | hypothetical protein, conserved                         | -0,2867 | 0,08542    |
| TcCLB.508873.280 | mucin-associated surface protein (MASP, pseudogene), pu | -0,2867 | 0,3068     |
| TcCLB.511019.99  | glutathione peroxidase, putative                        | -0,2868 | 0,16       |
| TcCLB.510523.10  | hypothetical protein, conserved (pseudogene)            | -0,2869 | 0,02961    |
| TcCLB.509269.10  | hypothetical protein, conserved                         | -0,287  | 0,06365    |

|                  |                                                           |         |          |
|------------------|-----------------------------------------------------------|---------|----------|
| TcCLB.506695.20  | hypothetical protein, conserved                           | -0,287  | 0,07577  |
| TcCLB.506017.41  | N-acetyltransferase complex ARD1 subunit (pseudogene),    | -0,2871 | 0,3369   |
| TcCLB.509437.106 | trans-sialidase (pseudogene), putative                    | -0,2871 | 0,5124   |
| TcCLB.506835.140 | hypothetical protein, conserved                           | -0,2872 | 0,006046 |
| TcCLB.506577.70  | hypothetical protein, conserved                           | -0,2872 | 0,03977  |
| TcCLB.510547.30  | trans-sialidase (pseudogene), putative                    | -0,2872 | 0,4085   |
| TcCLB.506563.10  | pumilio/PUF RNA binding protein 9, putative (PUF9)        | -0,2873 | 0,02205  |
| TcCLB.507023.240 | hypothetical protein, conserved                           | -0,2873 | 0,05679  |
| TcCLB.510761.22  | hypothetical protein, conserved                           | -0,2874 | 0,01347  |
| TcCLB.511151.39  | hypothetical protein, conserved                           | -0,2874 | 0,07911  |
| TcCLB.508625.140 | hypothetical protein, conserved                           | -0,2874 | 0,1218   |
| TcCLB.508539.20  | hypothetical protein, conserved                           | -0,2874 | 0,2066   |
| TcCLB.505949.20  | mucin-associated surface protein (MASP), putative         | -0,2874 | 0,3786   |
| TcCLB.510223.9   | hypothetical protein, conserved                           | -0,2875 | 0,5294   |
| TcCLB.504643.49  | hypothetical protein, conserved (fragment)                | -0,2876 | 0,005125 |
| TcCLB.503637.30  | serine peptidase, Clan SC, Family S9B                     | -0,2876 | 0,006032 |
| TcCLB.507513.80  | hypothetical protein, conserved                           | -0,2876 | 0,01225  |
| TcCLB.506793.50  | hypothetical protein, conserved                           | -0,2877 | 0,0575   |
| TcCLB.509121.10  | retrotransposon hot spot protein (RHS, pseudogene), putat | -0,2877 | 0,3233   |
| TcCLB.506113.86  | N-acetyltransferase complex ARD1 subunit (pseudogene),    | -0,2878 | 0,459    |
| TcCLB.508175.133 | hypothetical protein, conserved (pseudogene)              | -0,2879 | 0,003477 |
| TcCLB.506127.140 | hypothetical protein                                      | -0,2879 | 0,006071 |
| TcCLB.504213.70  | hypothetical protein, conserved                           | -0,2879 | 0,02544  |
| TcCLB.507737.30  | hypothetical protein, conserved                           | -0,2879 | 0,05533  |
| TcCLB.511111.50  | ubiquitin-conjugating enzyme, putative                    | -0,2879 | 0,5313   |
| TcCLB.507195.60  | hypothetical protein                                      | -0,2879 | 0,6648   |
| TcCLB.511277.539 | hypothetical protein, conserved                           | -0,288  | 0,1359   |
| TcCLB.503989.50  | hypothetical protein, conserved                           | -0,2883 | 0,001752 |
| TcCLB.503653.30  | ribosomal RNA processing protein 41B, putative (RRP41B)   | -0,2883 | 0,06348  |
| TcCLB.507549.40  | trans-sialidase (pseudogene), putative                    | -0,2883 | 0,1876   |
| TcCLB.511017.20  | 2,3-bisphosphoglycerate-independent phosphoglycerate m    | -0,2884 | 0,01416  |
| TcCLB.507747.130 | trans-sialidase (pseudogene), putative                    | -0,2885 | 0,2917   |
| TcCLB.509537.40  | hypothetical protein, conserved                           | -0,2886 | 0,01274  |
| TcCLB.507757.70  | dihydrolipoamide dehydrogenase, putative                  | -0,2886 | 0,1324   |
| TcCLB.506525.20  | protein transport protein SEC13, putative                 | -0,2887 | 0,03059  |
| TcCLB.511627.100 | TPR-repeat protein, putative                              | -0,2888 | 0,02002  |
| TcCLB.511337.20  | UDP-Gal or UDP-GlcNAc-dependent glycosyltransferase, pi   | -0,2888 | 0,5104   |
| TcCLB.507633.59  | mucin-associated surface protein (MASP, pseudogene), pu   | -0,2888 | 0,5425   |
| TcCLB.503557.30  | hypothetical protein, conserved                           | -0,2889 | 0,05157  |
| TcCLB.510767.50  | hypothetical protein, conserved                           | -0,2889 | 0,09288  |
| TcCLB.507007.50  | hypothetical protein, conserved                           | -0,289  | 0,0358   |
| TcCLB.503583.70  | hypothetical protein, conserved                           | -0,289  | 0,0533   |
| TcCLB.508131.19  | hypothetical protein, conserved (fragment)                | -0,289  | 0,06279  |
| TcCLB.510889.330 | hypothetical protein, conserved                           | -0,2891 | 0,1008   |
| TcCLB.426397.9   | kinesin, putative (fragment)                              | -0,2892 | 0,0341   |



|                  |                                                               |         |            |
|------------------|---------------------------------------------------------------|---------|------------|
| TcCLB.510313.20  | hypothetical protein, conserved                               | -0,2893 | 0,007929   |
| TcCLB.508293.60  | trans-sialidase, Group VI, putative                           | -0,2893 | 0,3995     |
| TcCLB.503955.70  | eukaryotic translation initiation factor 2 beta subunit, puta | -0,2894 | 0,02135    |
| TcCLB.508189.11  | retrotransposon hot spot protein (RHS, pseudogene), putat     | -0,2894 | 0,5238     |
| TcCLB.506679.180 | hypothetical protein, conserved                               | -0,2895 | 0,007208   |
| TcCLB.509671.30  | hypothetical protein, conserved                               | -0,2895 | 0,06927    |
| TcCLB.511761.20  | hypothetical protein, conserved                               | -0,2896 | 0,1385     |
| TcCLB.510399.39  | dispersed gene family protein 1 (DGF-1), putative             | -0,2896 | 0,3776     |
| TcCLB.510625.150 | mucin-associated surface protein (MASP), putative             | -0,2898 | 0,7117     |
| TcCLB.511303.9   | hypothetical protein, conserved                               | -0,2899 | 0,08644    |
| TcCLB.507711.140 | hypothetical protein, conserved                               | -0,2899 | 0,103      |
| TcCLB.507959.240 | syntaxin binding protein (pseudogene), putative               | -0,2899 | 0,5007     |
| TcCLB.506529.140 | hypothetical protein, conserved                               | -0,29   | 0,07867    |
| TcCLB.511183.103 | mucin-associated surface protein (MASP, pseudogene), pu       | -0,2902 | 0,4593     |
| TcCLB.505949.139 | mucin-associated surface protein (MASP, pseudogene), pu       | -0,2903 | 0,5357     |
| TcCLB.503959.20  | hypothetical protein, conserved                               | -0,2904 | 0,01263    |
| TcCLB.507521.120 | hypothetical protein, conserved                               | -0,2904 | 0,1451     |
| TcCLB.506133.54  | mucin-associated surface protein (MASP), putative             | -0,2906 | 0,4686     |
| TcCLB.511439.120 | aminopeptidase, putative                                      | -0,2907 | 0,004017   |
| TcCLB.507075.30  | trans-sialidase (pseudogene), putative                        | -0,2907 | 0,2254     |
| TcCLB.506961.25  | trans-sialidase, Group I, putative                            | -0,2908 | 0,108      |
| TcCLB.510133.9   | dispersed gene family protein 1 (DGF-1), putative (fragme     | -0,2908 | 0,4234     |
| TcCLB.510259.18  | GlcNAc-PI synthesis protein (GPI3)                            | -0,2909 | 0,09539    |
| TcCLB.508409.80  | hypothetical protein, conserved                               | -0,291  | 0,0003756  |
| TcCLB.507031.150 | hypothetical protein, conserved                               | -0,291  | 0,001062   |
| TcCLB.507941.40  | hypothetical protein, conserved                               | -0,291  | 0,04025    |
| TcCLB.508547.60  | hypothetical protein, conserved                               | -0,2911 | 0,06685    |
| TcCLB.506737.140 | syntaxin binding protein 1, putative                          | -0,2912 | 0,00052    |
| TcCLB.504071.90  | glycosyltransferase family 28 protein, putative               | -0,2912 | 0,02206    |
| TcCLB.504835.10  | hypothetical protein, conserved                               | -0,2912 | 0,04291    |
| TcCLB.510515.70  | hypothetical protein, conserved                               | -0,2912 | 0,2474     |
| TcCLB.509317.40  | ribosomal protein L11, putative                               | -0,2914 | 0,1031     |
| TcCLB.507021.90  | hypothetical protein, conserved                               | -0,2915 | 0,03876    |
| TcCLB.506537.50  | retrotransposon hot spot (RHS) protein, putative              | -0,2915 | 0,4188     |
| TcCLB.511231.14  | hypothetical protein (fragment)                               | -0,2916 | 0,03386    |
| TcCLB.509253.10  | hypothetical protein, conserved                               | -0,2916 | 0,04446    |
| TcCLB.509595.70  | Trichohyalin, putative                                        | -0,2919 | 0,01494    |
| TcCLB.504243.10  | RNA-binding protein, putative                                 | -0,2919 | 0,02097    |
| TcCLB.507959.336 | surface protease GP63 (pseudogene), putative                  | -0,2919 | 0,3604     |
| TcCLB.469435.4   | ribosomal protein L14, putative                               | -0,292  | 0,1693     |
| TcCLB.510303.80  | kinesin, putative                                             | -0,2921 | 0,02788    |
| TcCLB.503651.49  | hypothetical protein, conserved (pseudogene)                  | -0,2921 | 0,07978    |
| TcCLB.504923.10  | dispersed gene family protein 1 (DGF-1), putative             | -0,2921 | 0,6139     |
| TcCLB.506347.10  | dynein heavy chain (pseudogene), putative                     | -0,2922 | 0,00007664 |
| TcCLB.504225.10  | hypothetical protein, conserved                               | -0,2922 | 0,02302    |

|                  |                                                               |         |           |
|------------------|---------------------------------------------------------------|---------|-----------|
| TcCLB.508601.110 | hypothetical protein, conserved                               | -0,2923 | 0,002523  |
| TcCLB.510943.120 | hypothetical protein, conserved                               | -0,2923 | 0,00664   |
| TcCLB.503513.40  | proteasome regulatory non-ATPase subunit 6, putative          | -0,2923 | 0,02865   |
| TcCLB.431357.20  | UDP-Gal or UDP-GlcNAc-dependent glycosyltransferase, pu       | -0,2923 | 0,6017    |
| TcCLB.507007.80  | hypothetical protein                                          | -0,2924 | 0,001524  |
| TcCLB.509905.180 | mucin-associated surface protein (MASP), putative             | -0,2925 | 0,1983    |
| TcCLB.511367.90  | hypothetical protein, conserved                               | -0,2926 | 0,004985  |
| TcCLB.504153.300 | GTPase protein, putative                                      | -0,2927 | 0,01006   |
| TcCLB.511419.50  | 3-phosphoglycerate kinase, glycosomal (PGKA)                  | -0,2927 | 0,1006    |
| TcCLB.508139.210 | dispersed gene family protein 1 (DGF-1), putative             | -0,2927 | 0,1117    |
| TcCLB.469785.5   | hypothetical protein, conserved (fragment)                    | -0,2928 | 0,2245    |
| TcCLB.510763.40  | hypothetical protein, conserved                               | -0,293  | 0,08721   |
| TcCLB.506933.80  | RNA polymerase B subunit RPB8, putative                       | -0,2931 | 0,01397   |
| TcCLB.510475.120 | mucin-associated surface protein (MASP, pseudogene), pu       | -0,2931 | 0,7404    |
| TcCLB.504431.118 | hypothetical protein, conserved                               | -0,2934 | 0,03432   |
| TcCLB.508271.50  | hypothetical protein                                          | -0,2935 | 0,009674  |
| TcCLB.506895.20  | hypothetical protein, conserved                               | -0,2935 | 0,01032   |
| TcCLB.511071.190 | hypothetical protein, conserved                               | -0,2936 | 0,008463  |
| TcCLB.506933.20  | ribonucleoside-diphosphate reductase large chain, putative    | -0,2937 | 0,007006  |
| TcCLB.510143.90  | hypothetical protein, conserved                               | -0,2938 | 0,08078   |
| TcCLB.507089.130 | hypothetical protein, conserved                               | -0,2939 | 0,0322    |
| TcCLB.511277.30  | hypothetical protein, conserved (pseudogene)                  | -0,294  | 0,00293   |
| TcCLB.508839.80  | hypothetical protein, conserved                               | -0,294  | 0,01008   |
| TcCLB.508349.30  | hypothetical protein, conserved                               | -0,2943 | 0,0002238 |
| TcCLB.510659.10  | hypothetical protein, conserved                               | -0,2943 | 0,01335   |
| TcCLB.509647.120 | hypothetical protein                                          | -0,2944 | 0,04127   |
| TcCLB.511709.10  | hypothetical protein, conserved                               | -0,2945 | 0,04496   |
| TcCLB.511857.59  | katanin, putative                                             | -0,2945 | 0,05631   |
| TcCLB.510183.30  | hypothetical protein, conserved                               | -0,2946 | 0,004542  |
| TcCLB.511461.10  | hypothetical protein, conserved                               | -0,2946 | 0,07964   |
| TcCLB.509965.350 | ubiquitin-protein ligase, putative                            | -0,2948 | 0,001562  |
| TcCLB.510187.110 | Mitochondrial ribosomal protein S18, putative (MRPS18)        | -0,2949 | 0,003949  |
| TcCLB.509505.40  | hypothetical protein, conserved                               | -0,2949 | 0,03074   |
| TcCLB.509575.50  | Casein kinase II subunit beta, putative                       | -0,2949 | 0,1089    |
| TcCLB.507877.10  | mucin-associated surface protein (MASP, pseudogene), pu       | -0,2949 | 0,5356    |
| TcCLB.506583.30  | ubiquitin-like protein, putative                              | -0,2952 | 0,0006914 |
| TcCLB.453767.20  | trans-sialidase (pseudogene), putative                        | -0,2952 | 0,3534    |
| TcCLB.506265.150 | hypothetical protein, conserved                               | -0,2953 | 0,1696    |
| TcCLB.507063.20  | eukaryotic translation initiation factor 2 beta subunit, puta | -0,2954 | 0,003876  |
| TcCLB.511277.480 | hypothetical protein, conserved                               | -0,2954 | 0,01779   |
| TcCLB.506407.20  | hypothetical protein, conserved                               | -0,2954 | 0,09443   |
| TcCLB.506975.69  | hypothetical protein, conserved                               | -0,2954 | 0,1277    |
| TcCLB.504167.7   | hypothetical protein, conserved                               | -0,2954 | 0,2138    |
| TcCLB.422843.10  | trans-sialidase (pseudogene), putative                        | -0,2955 | 0,09374   |
| TcCLB.506451.20  | trans-sialidase, Group V, putative                            | -0,2955 | 0,2955    |

|                   |                                                          |         |          |
|-------------------|----------------------------------------------------------|---------|----------|
| TcCLB.503893.181  | hypothetical protein, conserved (fragment)               | -0,2955 | 0,4026   |
| TcCLB.504031.40   | hypothetical protein                                     | -0,2955 | 0,5427   |
| TcCLB.508873.160  | mucin-associated surface protein (MASP), putative        | -0,2955 | 0,6593   |
| TcCLB.506863.70   | hypothetical protein, conserved                          | -0,2957 | 0,008217 |
| TcCLB.509875.190  | clathrin coat assembly protein, putative                 | -0,2957 | 0,008269 |
| TcCLB.509945.24   | hypothetical protein, conserved                          | -0,2957 | 0,1066   |
| TcCLB.397937.5    | N-acetylglucosamine-6-phosphate deacetylase-like protein | -0,2957 | 0,1119   |
| TcCLB.504125.50   | mitochondrial carrier protein, putative                  | -0,2959 | 0,02483  |
| TcCLB.510121.40   | hypothetical protein                                     | -0,2959 | 0,07987  |
| TcCLB.509033.10   | trans-sialidase (pseudogene), putative                   | -0,2959 | 0,3519   |
| TcCLB.506859.90   | prefoldin, putative                                      | -0,296  | 0,0213   |
| TcCLB.505939.10   | hypothetical protein                                     | -0,296  | 0,5266   |
| TcCLB.510421.210  | hypothetical protein, conserved                          | -0,2961 | 0,004429 |
| TcCLB.506831.50   | hypothetical protein, conserved                          | -0,2961 | 0,004863 |
| TcCLB.510885.70   | hypothetical protein, conserved                          | -0,2961 | 0,04271  |
| TcCLB.511751.144  | hypothetical protein, conserved                          | -0,2962 | 0,01034  |
| TcCLB.507609.30   | ATP-dependent DEAD/H RNA helicase, putative              | -0,2962 | 0,04004  |
| TcCLB.508153.1120 | DNA repair helicase, putative                            | -0,2964 | 0,01501  |
| TcCLB.511885.35   | trans-sialidase (pseudogene), putative                   | -0,2964 | 0,2729   |
| TcCLB.510377.439  | mucin TcMUCII, putative                                  | -0,2964 | 0,5267   |
| TcCLB.509827.10   | hypothetical protein, conserved                          | -0,2965 | 0,02419  |
| TcCLB.507511.30   | RNA guanylyltransferase, putative                        | -0,2966 | 0,01756  |
| TcCLB.508817.140  | hypothetical protein, conserved                          | -0,2969 | 0,002791 |
| TcCLB.506627.50   | mitochondrial exoribonuclease DSS-1, putative            | -0,2969 | 0,004683 |
| TcCLB.510661.40   | hypothetical protein, conserved                          | -0,2969 | 0,005119 |
| TcCLB.504071.60   | hypothetical protein, conserved                          | -0,2969 | 0,01603  |
| TcCLB.508207.279  | hypothetical protein, conserved                          | -0,2969 | 0,1083   |
| TcCLB.507041.85   | hypothetical protein, conserved (pseudogene)             | -0,2969 | 0,1432   |
| TcCLB.509315.10   | hypothetical protein, conserved (pseudogene)             | -0,2969 | 0,4441   |
| TcCLB.506865.40   | guanine nucleotide exchange factor subunit GCD7          | -0,2972 | 0,01086  |
| TcCLB.508409.20   | hypothetical protein, conserved                          | -0,2972 | 0,01296  |
| TcCLB.507747.260  | hypothetical protein, conserved                          | -0,2972 | 0,0184   |
| TcCLB.511625.50   | GTP-binding protein, putative                            | -0,2974 | 0,003407 |
| TcCLB.507019.40   | histidyl-tRNA synthetase                                 | -0,2975 | 0,00116  |
| TcCLB.508153.960  | hypothetical protein, conserved                          | -0,2975 | 0,02282  |
| TcCLB.503751.20   | hypothetical protein                                     | -0,2975 | 0,3586   |
| TcCLB.504103.40   | hypothetical protein, conserved                          | -0,2976 | 0,05004  |
| TcCLB.508463.10   | hypothetical protein, conserved                          | -0,2976 | 0,2236   |
| TcCLB.506909.120  | hypothetical protein                                     | -0,2976 | 0,6313   |
| TcCLB.511157.9    | neurobeachin/beige protein, putative (fragment)          | -0,2977 | 0,005895 |
| TcCLB.508879.220  | hypothetical protein, conserved                          | -0,2978 | 0,01624  |
| TcCLB.509979.119  | hypothetical protein, conserved                          | -0,2978 | 0,1006   |
| TcCLB.509933.10   | hypothetical protein, conserved                          | -0,2978 | 0,1944   |
| TcCLB.511303.30   | hypothetical protein, conserved                          | -0,298  | 0,03457  |
| TcCLB.506979.59   | hypothetical protein, conserved                          | -0,298  | 0,1012   |

|                  |                                                           |         |            |
|------------------|-----------------------------------------------------------|---------|------------|
| TcCLB.506361.44  | mucin TcMUC (pseudogene), putative                        | -0,298  | 0,342      |
| TcCLB.511491.40  | hypothetical protein, conserved                           | -0,2981 | 0,001683   |
| TcCLB.505123.4   | ATP-dependent RNA helicase, putative (fragment)           | -0,2981 | 0,0125     |
| TcCLB.506493.110 | hypothetical protein, conserved                           | -0,2981 | 0,1684     |
| TcCLB.508107.30  | trans-sialidase, Group VI, putative                       | -0,2982 | 0,5576     |
| TcCLB.505163.30  | hypothetical protein, conserved                           | -0,2983 | 0,01557    |
| TcCLB.507823.10  | hypothetical protein, conserved                           | -0,2983 | 0,03775    |
| TcCLB.503489.30  | hypothetical protein, conserved                           | -0,2983 | 0,05567    |
| TcCLB.509715.130 | hypothetical protein, conserved                           | -0,2984 | 0,04414    |
| TcCLB.510205.15  | mucin TcMUCII (pseudogene), putative                      | -0,2984 | 0,5076     |
| TcCLB.508647.200 | triosephosphate isomerase, putative (TIM)                 | -0,2985 | 0,00002167 |
| TcCLB.507165.10  | hypothetical protein, conserved                           | -0,2985 | 0,07159    |
| TcCLB.511491.90  | hypothetical protein                                      | -0,2986 | 0,07804    |
| TcCLB.506717.200 | hypothetical protein, conserved                           | -0,2986 | 0,1823     |
| TcCLB.506605.10  | hypothetical protein, conserved                           | -0,2987 | 0,1314     |
| TcCLB.507803.49  | histone deacetylase, putative                             | -0,2987 | 0,2477     |
| TcCLB.509395.10  | hypothetical protein, conserved                           | -0,2988 | 0,02424    |
| TcCLB.511229.90  | hypothetical protein, conserved                           | -0,2988 | 0,02526    |
| TcCLB.507735.60  | hypothetical protein, conserved                           | -0,2989 | 0,01107    |
| TcCLB.509455.110 | hypothetical protein, conserved                           | -0,2989 | 0,09774    |
| TcCLB.508593.120 | hypothetical protein, conserved                           | -0,2989 | 0,09947    |
| TcCLB.508857.140 | hypothetical protein, conserved                           | -0,2991 | 0,01953    |
| TcCLB.509161.20  | hypothetical protein, conserved                           | -0,2992 | 0,08824    |
| TcCLB.511235.10  | hypothetical protein, conserved (pseudogene)              | -0,2992 | 0,4063     |
| TcCLB.506357.40  | Elongation factor Tu, mitochondrial, putative (EF-Tu)     | -0,2993 | 0,001341   |
| TcCLB.510187.260 | hypothetical protein, conserved                           | -0,2993 | 0,03068    |
| TcCLB.507969.50  | actin 2, putative                                         | -0,2993 | 0,1051     |
| TcCLB.508455.20  | trans-sialidase, Group V, putative                        | -0,2993 | 0,3425     |
| TcCLB.507019.100 | nuclear movement protein, putative                        | -0,2994 | 0,02607    |
| TcCLB.511859.161 | hypothetical protein                                      | -0,2996 | 0,1836     |
| TcCLB.507001.4   | hypothetical protein, conserved                           | -0,2996 | 0,3263     |
| TcCLB.506959.50  | hypothetical protein, conserved                           | -0,2997 | 0,01715    |
| TcCLB.506887.40  | hypothetical protein, conserved                           | -0,2997 | 0,03112    |
| TcCLB.511289.59  | Multiprotein-bridging factor 1, putative (mbf1)           | -0,2998 | 0,00884    |
| TcCLB.506753.220 | hypothetical protein, conserved                           | -0,2998 | 0,2638     |
| TcCLB.506525.30  | hypothetical protein, conserved                           | -0,3    | 0,01267    |
| TcCLB.509875.204 | hypothetical protein, conserved                           | -0,3001 | 0,05499    |
| TcCLB.480653.10  | hypothetical protein, conserved                           | -0,3002 | 0,09336    |
| TcCLB.508637.70  | RNA helicase, putative                                    | -0,3003 | 0,006067   |
| TcCLB.509611.10  | DNA repair and recombination helicase protein PIF7, putat | -0,3004 | 0,06044    |
| TcCLB.509741.34  | hypothetical protein, conserved                           | -0,3005 | 0,1645     |
| TcCLB.506635.120 | kinesin, putative                                         | -0,3006 | 0,01366    |
| TcCLB.508479.83  | N-acetyltransferase complex ARD1 subunit (pseudogene),    | -0,3006 | 0,4383     |
| TcCLB.510329.260 | hypothetical protein, conserved                           | -0,3007 | 0,000169   |
| TcCLB.503885.50  | hypothetical protein, conserved                           | -0,3007 | 0,03612    |

|                  |                                                           |         |            |
|------------------|-----------------------------------------------------------|---------|------------|
| TcCLB.507839.35  | trans-sialidase, putative                                 | -0,3007 | 0,3178     |
| TcCLB.506945.270 | cyclin, putative                                          | -0,3008 | 0,01594    |
| TcCLB.506791.20  | hypothetical protein, conserved                           | -0,3009 | 0,01423    |
| TcCLB.510029.10  | hypothetical protein, conserved (pseudogene)              | -0,3009 | 0,1153     |
| TcCLB.504051.49  | hypothetical protein, conserved                           | -0,3009 | 0,1238     |
| TcCLB.506529.160 | hypothetical protein, conserved                           | -0,301  | 0,02261    |
| TcCLB.507709.110 | hypothetical protein, conserved                           | -0,301  | 0,2        |
| TcCLB.503893.50  | hypothetical protein, conserved                           | -0,3011 | 0,04628    |
| TcCLB.503495.10  | dispersed gene family protein 1 (DGF-1), putative         | -0,3011 | 0,2014     |
| TcCLB.510143.70  | hypothetical protein, conserved                           | -0,3013 | 0,0009447  |
| TcCLB.508995.30  | tubulin-tyrosine ligase, putative                         | -0,3013 | 0,03075    |
| TcCLB.507031.10  | hypothetical protein, conserved                           | -0,3013 | 0,03631    |
| TcCLB.434259.19  | hypothetical protein, conserved                           | -0,3013 | 0,0931     |
| TcCLB.506743.90  | hypothetical protein, conserved                           | -0,3013 | 0,236      |
| TcCLB.510301.20  | fructose-bisphosphate aldolase, glycosomal, putative      | -0,3014 | 0,01162    |
| TcCLB.511283.190 | U2 small nuclear ribonucleoprotein 40K, putative          | -0,3014 | 0,01284    |
| TcCLB.508637.160 | dual specificity protein phosphatase, putative            | -0,3014 | 0,04437    |
| TcCLB.509213.60  | hypothetical protein, conserved                           | -0,3014 | 0,1334     |
| TcCLB.506525.45  | hypothetical protein, conserved (pseudogene)              | -0,3014 | 0,2754     |
| TcCLB.510577.40  | hypothetical protein, conserved                           | -0,3016 | 0,04678    |
| TcCLB.507987.20  | hypothetical protein                                      | -0,3016 | 0,6635     |
| TcCLB.510533.220 | hypothetical protein, conserved                           | -0,3017 | 0,01541    |
| TcCLB.510359.450 | hypothetical protein                                      | -0,3017 | 0,58       |
| TcCLB.507517.110 | hypothetical protein, conserved                           | -0,3018 | 0,0636     |
| TcCLB.506495.10  | hypothetical protein, conserved                           | -0,3018 | 0,08759    |
| TcCLB.511211.120 | receptor for activated C kinase 1, putative               | -0,3019 | 0,00002057 |
| TcCLB.508899.130 | hypothetical protein, conserved                           | -0,3019 | 0,1543     |
| TcCLB.505989.74  | peroxisome biogenesis factor 1, putative                  | -0,3021 | 0,004066   |
| TcCLB.510029.40  | DNA-directed RNA polymerase III subunit C11, putative (RF | -0,3021 | 0,09598    |
| TcCLB.509135.9   | hypothetical protein (fragment)                           | -0,3021 | 0,1594     |
| TcCLB.509569.90  | ARP2/3 complex subunit, putative                          | -0,3023 | 0,06824    |
| TcCLB.504185.9   | hypothetical protein, conserved                           | -0,3023 | 0,3233     |
| TcCLB.510149.110 | phosphate transporter, putative                           | -0,3024 | 0,01766    |
| TcCLB.506201.154 | hypothetical protein, conserved                           | -0,3024 | 0,113      |
| TcCLB.510013.150 | mucin-associated surface protein (MASP, pseudogene), pu   | -0,3024 | 0,4058     |
| TcCLB.509627.40  | succinate dehydrogenase subunit (SDH9)                    | -0,3025 | 0,02409    |
| TcCLB.511589.29  | hypothetical protein, conserved                           | -0,3025 | 0,06173    |
| TcCLB.511179.114 | hypothetical protein, conserved                           | -0,3025 | 0,1229     |
| TcCLB.506131.161 | trans-sialidase (pseudogene), putative                    | -0,3025 | 0,4513     |
| TcCLB.511145.24  | hypothetical protein, conserved                           | -0,3026 | 0,2568     |
| TcCLB.508543.150 | hypothetical protein, conserved                           | -0,3027 | 0,001554   |
| TcCLB.507099.20  | hypothetical protein, conserved                           | -0,3028 | 0,006031   |
| TcCLB.510105.160 | hypothetical protein                                      | -0,3029 | 0,07268    |
| TcCLB.503855.10  | hypothetical protein, conserved                           | -0,303  | 0,1072     |
| TcCLB.511417.94  | hypothetical protein, conserved                           | -0,3031 | 0,09171    |

|                  |                                                         |         |           |
|------------------|---------------------------------------------------------|---------|-----------|
| TcCLB.511643.20  | dihydroorotate dehydrogenase, putative (DHODH)          | -0,3034 | 0,02806   |
| TcCLB.508165.40  | trans-sialidase (pseudogene), putative                  | -0,3034 | 0,3733    |
| TcCLB.510499.10  | dispersed gene family protein 1 (DGF-1), putative       | -0,3034 | 0,4797    |
| TcCLB.510595.49  | hypothetical protein, conserved                         | -0,3035 | 0,02697   |
| TcCLB.511249.40  | hypothetical protein, conserved                         | -0,3035 | 0,0293    |
| TcCLB.508277.180 | mismatch repair protein MSH3, putative                  | -0,3036 | 0,0004932 |
| TcCLB.506709.40  | hypothetical protein, conserved                         | -0,3037 | 0,05889   |
| TcCLB.506363.20  | hypothetical protein, conserved                         | -0,3037 | 0,08962   |
| TcCLB.509319.100 | hypothetical protein, conserved                         | -0,304  | 0,03557   |
| TcCLB.511055.20  | retrotransposon hot spot (RHS) protein, putative        | -0,3041 | 0,000459  |
| TcCLB.504047.70  | hypothetical protein, conserved                         | -0,3041 | 0,008206  |
| TcCLB.506479.80  | hypothetical protein, conserved                         | -0,3041 | 0,0358    |
| TcCLB.452895.10  | hypothetical protein, conserved                         | -0,3041 | 0,1086    |
| TcCLB.511507.60  | hypothetical protein                                    | -0,3041 | 0,1103    |
| TcCLB.508719.40  | kinetoplast DNA-associated protein, putative            | -0,3042 | 0,01873   |
| TcCLB.511577.144 | hypothetical protein, conserved                         | -0,3042 | 0,09758   |
| TcCLB.504239.380 | hypothetical protein                                    | -0,3042 | 0,6291    |
| TcCLB.506625.200 | ribosomal RNA processing protein 40, putative (RRP40)   | -0,3043 | 0,07103   |
| TcCLB.507011.110 | hypothetical protein                                    | -0,3044 | 0,06262   |
| TcCLB.509395.59  | hypothetical protein, conserved                         | -0,3044 | 0,1577    |
| TcCLB.506627.100 | hypothetical protein, conserved                         | -0,3045 | 0,07779   |
| TcCLB.507011.80  | zinc finger protein, putative                           | -0,3046 | 0,03498   |
| TcCLB.507443.14  | RNA polymerase IIA largest subunit, putative (fragment) | -0,3046 | 0,04305   |
| TcCLB.508329.19  | trans-sialidase (pseudogene), putative                  | -0,3047 | 0,4495    |
| TcCLB.507093.60  | hypothetical protein, conserved                         | -0,3048 | 0,004683  |
| TcCLB.511203.20  | surface protease GP63, putative                         | -0,3048 | 0,1439    |
| TcCLB.506841.4   | hypothetical protein, conserved                         | -0,305  | 0,2158    |
| TcCLB.507837.10  | Peptidase C50 separase, putative                        | -0,3051 | 0,04305   |
| TcCLB.508815.40  | hypothetical protein, conserved                         | -0,3051 | 0,05593   |
| TcCLB.510663.64  | mitochondrial carrier protein, putative                 | -0,3051 | 0,08285   |
| TcCLB.481729.10  | hypothetical protein, conserved                         | -0,3052 | 0,06      |
| TcCLB.511369.5   | elongation factor 1-alpha, putative (fragment)          | -0,3052 | 0,5197    |
| TcCLB.510955.60  | hypothetical protein, conserved                         | -0,3053 | 0,01824   |
| TcCLB.509895.60  | hypothetical protein, conserved                         | -0,3055 | 0,2158    |
| TcCLB.508257.110 | hypothetical protein, conserved                         | -0,3057 | 0,004724  |
| TcCLB.507875.180 | AGP2beta-2, putative                                    | -0,3057 | 0,006216  |
| TcCLB.511277.620 | hypothetical protein, conserved                         | -0,3057 | 0,009633  |
| TcCLB.507677.10  | hypothetical protein, conserved                         | -0,3057 | 0,01296   |
| TcCLB.510289.99  | hypothetical protein, conserved                         | -0,3058 | 0,1091    |
| TcCLB.510659.80  | hypothetical protein, conserved                         | -0,3059 | 0,02238   |
| TcCLB.508153.220 | hypothetical protein, conserved                         | -0,306  | 0,02308   |
| TcCLB.506223.84  | hypothetical protein, conserved                         | -0,306  | 0,0427    |
| TcCLB.504027.10  | hypothetical protein, conserved                         | -0,306  | 0,07212   |
| TcCLB.508153.810 | hypothetical protein, conserved                         | -0,3061 | 0,09376   |
| TcCLB.457979.10  | mucin-associated surface protein (MASP), putative       | -0,3061 | 0,6407    |

|                  |                                                            |         |           |
|------------------|------------------------------------------------------------|---------|-----------|
| TcCLB.507669.60  | hypothetical protein, conserved                            | -0,3062 | 0,02522   |
| TcCLB.511771.185 | hypothetical protein                                       | -0,3062 | 0,3103    |
| TcCLB.507979.50  | hypothetical protein, conserved                            | -0,3063 | 0,005868  |
| TcCLB.511401.24  | hypothetical protein, conserved (pseudogene)               | -0,3063 | 0,1215    |
| TcCLB.508181.70  | hypothetical protein, conserved                            | -0,3064 | 0,001086  |
| TcCLB.504149.60  | hypothetical protein                                       | -0,3065 | 0,001849  |
| TcCLB.511367.190 | hypothetical protein, conserved                            | -0,3065 | 0,005524  |
| TcCLB.507023.170 | hypothetical protein, conserved                            | -0,3065 | 0,01264   |
| TcCLB.505037.157 | trans-sialidase (pseudogene), putative                     | -0,3065 | 0,03754   |
| TcCLB.508221.880 | hypothetical protein                                       | -0,3065 | 0,6703    |
| TcCLB.511445.110 | hypothetical protein, conserved                            | -0,3066 | 0,07424   |
| TcCLB.510747.170 | hypothetical protein, conserved                            | -0,3066 | 0,1629    |
| TcCLB.508277.140 | phosphomevalonate kinase protein, putative                 | -0,3067 | 0,0007878 |
| TcCLB.511751.14  | hypothetical protein, conserved (fragment)                 | -0,3067 | 0,05397   |
| TcCLB.506175.30  | hypothetical protein, conserved                            | -0,3067 | 0,2183    |
| TcCLB.510509.50  | mitochondrial RNA binding protein, putative                | -0,3068 | 0,01729   |
| TcCLB.508797.20  | hypothetical protein, conserved                            | -0,3068 | 0,1748    |
| TcCLB.510355.104 | ATP-dependent DEAD/H RNA helicase (pseudogene), putat      | -0,3068 | 0,4119    |
| TcCLB.506975.60  | hypothetical protein, conserved                            | -0,3069 | 0,003306  |
| TcCLB.506337.140 | hypothetical protein, conserved                            | -0,3069 | 0,0112    |
| TcCLB.508531.10  | glycine dehydrogenase (pseudogene), putative               | -0,3069 | 0,2965    |
| TcCLB.508543.80  | hypothetical protein, conserved                            | -0,307  | 0,05593   |
| TcCLB.508823.130 | hypothetical protein, conserved                            | -0,3071 | 0,0008967 |
| TcCLB.509171.70  | hypothetical protein, conserved                            | -0,3071 | 0,03724   |
| TcCLB.509395.40  | hypothetical protein, conserved                            | -0,3071 | 0,05417   |
| TcCLB.511461.40  | hypothetical protein, conserved                            | -0,3072 | 0,01784   |
| TcCLB.507649.60  | hypothetical protein, conserved                            | -0,3073 | 0,0291    |
| TcCLB.504867.114 | tyrosine phosphatase, putative                             | -0,3073 | 0,04399   |
| TcCLB.511439.80  | hypothetical protein, conserved                            | -0,3074 | 0,0009007 |
| TcCLB.505999.70  | hypothetical protein, conserved                            | -0,3076 | 0,01857   |
| TcCLB.510243.110 | hypothetical protein, conserved                            | -0,3078 | 0,05187   |
| TcCLB.510329.200 | UDP-GlcNAc:PI a1-6 GlcNAc-transferase, putative            | -0,308  | 0,001341  |
| TcCLB.506679.60  | hypothetical protein, conserved                            | -0,308  | 0,02323   |
| TcCLB.511089.70  | mucin-associated surface protein (MASP, pseudogene), pu    | -0,308  | 0,3205    |
| TcCLB.506575.50  | hypothetical protein, conserved                            | -0,3082 | 0,0008592 |
| TcCLB.506859.49  | hypothetical protein, conserved                            | -0,3082 | 0,004502  |
| TcCLB.510123.40  | hypothetical protein, conserved                            | -0,3082 | 0,2156    |
| TcCLB.510225.40  | hypothetical protein, conserved                            | -0,3084 | 0,006806  |
| TcCLB.504001.6   | protein kinase, putative                                   | -0,3084 | 0,009481  |
| TcCLB.509033.40  | hypothetical protein, conserved                            | -0,3085 | 0,01834   |
| TcCLB.508251.50  | mucin-associated surface protein (MASP), putative (fragm   | -0,3085 | 0,6663    |
| TcCLB.511389.50  | hypothetical protein, conserved                            | -0,3086 | 0,001181  |
| TcCLB.505365.50  | beta galactofuranosyl glycosyltransferase (pseudogene), pi | -0,3086 | 0,2078    |
| TcCLB.510767.30  | hypothetical protein                                       | -0,3087 | 0,1302    |
| TcCLB.511127.350 | hypothetical protein, conserved                            | -0,3088 | 0,01527   |

|                  |                                                              |         |           |
|------------------|--------------------------------------------------------------|---------|-----------|
| TcCLB.511647.40  | hypothetical protein, conserved                              | -0,3088 | 0,02324   |
| TcCLB.510163.10  | hypothetical protein, conserved                              | -0,3088 | 0,02583   |
| TcCLB.506295.90  | coatomer subunit zeta, putative                              | -0,3089 | 0,09897   |
| TcCLB.508515.20  | translation factor sui1, putative                            | -0,3091 | 0,01731   |
| TcCLB.507963.30  | hypothetical protein, conserved                              | -0,3092 | 0,0004682 |
| TcCLB.511603.320 | mucin-associated surface protein (MASP), putative            | -0,3092 | 0,5581    |
| TcCLB.508409.9   | 26S proteasome regulatory non-ATPase subunit, putative       | -0,3093 | 0,00837   |
| TcCLB.506989.150 | hypothetical protein, conserved                              | -0,3095 | 0,01286   |
| TcCLB.509231.39  | hypothetical protein, conserved                              | -0,3095 | 0,132     |
| TcCLB.506357.110 | hypothetical protein, conserved                              | -0,3096 | 0,01895   |
| TcCLB.511425.40  | hypothetical protein, conserved                              | -0,3097 | 0,01203   |
| TcCLB.503431.40  | hypothetical protein, conserved                              | -0,3098 | 0,07447   |
| TcCLB.417091.10  | RNA pseudouridylate synthase, putative                       | -0,3098 | 0,1387    |
| TcCLB.504985.20  | UDP-Gal or UDP-GlcNAc-dependent glycosyltransferase, pu      | -0,3098 | 0,4407    |
| TcCLB.511907.220 | hypothetical protein, conserved                              | -0,3099 | 0,02828   |
| TcCLB.510509.9   | inositol 1,4,5-trisphosphate receptor, putative (fragment) ( | -0,31   | 0,01658   |
| TcCLB.503925.100 | hypothetical protein, conserved                              | -0,3101 | 0,05114   |
| TcCLB.507683.34  | hypothetical protein, conserved                              | -0,3101 | 0,09024   |
| TcCLB.510359.190 | hypothetical protein, conserved                              | -0,3101 | 0,1158    |
| TcCLB.510189.40  | mucin-associated surface protein (MASP), putative            | -0,3101 | 0,378     |
| TcCLB.416761.10  | surface protease GP63, putative                              | -0,3101 | 0,4447    |
| TcCLB.511109.50  | hypothetical protein, conserved (pseudogene)                 | -0,3103 | 0,07379   |
| TcCLB.504241.85  | hypothetical protein, conserved (pseudogene)                 | -0,3103 | 0,1827    |
| TcCLB.509571.70  | hypothetical protein, conserved                              | -0,3104 | 0,01831   |
| TcCLB.509569.180 | hypothetical protein, conserved                              | -0,3104 | 0,03211   |
| TcCLB.503697.110 | hypothetical protein, conserved                              | -0,3105 | 0,03178   |
| TcCLB.507795.50  | syntaxin, putative                                           | -0,3105 | 0,03491   |
| TcCLB.508547.9   | UDP-Gal or UDP-GlcNAc-dependent glycosyltransferase, pu      | -0,3105 | 0,06752   |
| TcCLB.506547.10  | dispersed gene family protein 1 (DGF-1, pseudogene), puta    | -0,3107 | 0,3743    |
| TcCLB.507257.20  | hypothetical protein, conserved                              | -0,3108 | 0,01698   |
| TcCLB.503881.50  | hypothetical protein, conserved                              | -0,3109 | 0,2541    |
| TcCLB.511049.10  | hypothetical protein, conserved (pseudogene)                 | -0,3111 | 0,1065    |
| TcCLB.506925.160 | hypothetical protein, conserved                              | -0,3112 | 0,0512    |
| TcCLB.507093.120 | hypothetical protein, conserved                              | -0,3113 | 0,05216   |
| TcCLB.508605.10  | retrotransposon hot spot protein (RHS, pseudogene), putat    | -0,3113 | 0,2259    |
| TcCLB.504411.20  | divalent cation tolerance protein, putative                  | -0,3115 | 0,3475    |
| TcCLB.504137.130 | hypothetical protein, conserved                              | -0,3116 | 0,01257   |
| TcCLB.507057.30  | arginine N-methyltransferase, type I (PRMT6)                 | -0,3116 | 0,09529   |
| TcCLB.510149.20  | hypothetical protein, conserved                              | -0,3119 | 0,02577   |
| TcCLB.506821.100 | mitochondrial RNA binding complex 1 subunit, putative (M     | -0,312  | 0,007659  |
| TcCLB.506507.20  | hypothetical protein, conserved                              | -0,312  | 0,09729   |
| TcCLB.511021.99  | hypothetical protein, conserved                              | -0,312  | 0,1364    |
| TcCLB.508753.20  | trans-sialidase, Group V, putative                           | -0,312  | 0,3589    |
| TcCLB.511307.10  | kinesin, putative                                            | -0,3121 | 0,01352   |
| TcCLB.510359.230 | hypothetical protein, conserved                              | -0,3124 | 0,006699  |



|                  |                                                               |         |            |
|------------------|---------------------------------------------------------------|---------|------------|
| TcCLB.506471.19  | hypothetical protein, conserved                               | -0,3124 | 0,1682     |
| TcCLB.508165.425 | mucin TcMUC (pseudogene), putative                            | -0,3124 | 0,5352     |
| TcCLB.509991.40  | transmembrane protein, conserved (pseudogene)                 | -0,3125 | 0,0000997  |
| TcCLB.504153.220 | DNA recombination and repair protein RAD51, putative          | -0,3126 | 0,008838   |
| TcCLB.507641.230 | hypothetical protein, conserved                               | -0,3126 | 0,009454   |
| TcCLB.503499.24  | hypothetical protein                                          | -0,3126 | 0,3364     |
| TcCLB.508559.40  | retrotransposon hot spot protein (RHS, pseudogene), putative  | -0,3127 | 0,08357    |
| TcCLB.508731.40  | hypothetical protein, conserved                               | -0,3128 | 0,01852    |
| TcCLB.511137.20  | hypothetical protein, conserved                               | -0,3128 | 0,06967    |
| TcCLB.509179.90  | hypothetical protein, conserved                               | -0,3128 | 0,2908     |
| TcCLB.506741.100 | trans-sialidase, Group V, putative                            | -0,3128 | 0,411      |
| TcCLB.504213.60  | hypothetical protein, conserved                               | -0,3129 | 0,007443   |
| TcCLB.510173.10  | hypothetical protein, conserved                               | -0,3129 | 0,05546    |
| TcCLB.510279.314 | mucin TcMUCII (pseudogene), putative                          | -0,313  | 0,5684     |
| TcCLB.509561.70  | hypothetical protein, conserved                               | -0,3131 | 0,003056   |
| TcCLB.504247.10  | hypothetical protein, conserved                               | -0,3131 | 0,05198    |
| TcCLB.506201.10  | hypothetical protein, conserved                               | -0,3132 | 0,05033    |
| TcCLB.506653.10  | trans-sialidase, putative                                     | -0,3132 | 0,6601     |
| TcCLB.503869.40  | pumilio/PUF RNA binding protein 9, putative (PUF9)            | -0,3134 | 0,0381     |
| TcCLB.508325.320 | protein kinase, putative                                      | -0,3134 | 0,165      |
| TcCLB.511621.240 | hypothetical protein, conserved                               | -0,3138 | 0,00121    |
| TcCLB.508549.10  | legume-like lectin, putative                                  | -0,3138 | 0,009473   |
| TcCLB.507997.70  | hypothetical protein, conserved                               | -0,3138 | 0,01501    |
| TcCLB.509721.50  | hypothetical protein                                          | -0,3138 | 0,0668     |
| TcCLB.505267.110 | dispersed gene family protein 1 (DGF-1), putative             | -0,3138 | 0,178      |
| TcCLB.510983.10  | hypothetical protein                                          | -0,3139 | 0,2271     |
| TcCLB.511051.70  | aminopeptidase, putative                                      | -0,314  | 0,003149   |
| TcCLB.507515.140 | oxysterol-binding protein, putative                           | -0,314  | 0,01345    |
| TcCLB.507775.50  | proteasome alpha 7 subunit, putative                          | -0,314  | 0,02411    |
| TcCLB.508323.40  | hypothetical protein, conserved                               | -0,314  | 0,08757    |
| TcCLB.506945.260 | hypothetical protein, conserved                               | -0,3141 | 0,0006113  |
| TcCLB.509647.26  | hypothetical protein, conserved                               | -0,3141 | 0,01802    |
| TcCLB.507997.50  | hypothetical protein, conserved                               | -0,3141 | 0,03396    |
| TcCLB.506641.9   | dispersed gene family protein 1 (DGF-1), putative             | -0,3141 | 0,3541     |
| TcCLB.510583.209 | mucin-associated surface protein (MASP, pseudogene), putative | -0,3141 | 0,7282     |
| TcCLB.506011.20  | hypothetical protein, conserved (pseudogene)                  | -0,3142 | 0,1789     |
| TcCLB.511211.160 | heat shock protein 70 (hsp70), putative                       | -0,3144 | 0,00004775 |
| TcCLB.509235.20  | C-5 sterol desaturase, putative                               | -0,3144 | 0,03584    |
| TcCLB.511057.60  | mucin-associated surface protein (MASP), putative             | -0,3144 | 0,3769     |
| TcCLB.507611.300 | U1A small nuclear ribonucleoprotein, putative                 | -0,3145 | 0,1208     |
| TcCLB.506945.340 | hypothetical protein, conserved                               | -0,3146 | 0,001673   |
| TcCLB.511491.150 | hypothetical protein, conserved                               | -0,3147 | 0,02756    |
| TcCLB.509569.170 | hypothetical protein                                          | -0,3148 | 0,001336   |
| TcCLB.506925.540 | hypothetical protein, conserved                               | -0,3148 | 0,004146   |
| TcCLB.510075.30  | hypothetical protein, conserved                               | -0,3149 | 0,002614   |

|                  |                                                           |         |            |
|------------------|-----------------------------------------------------------|---------|------------|
| TcCLB.490165.9   | DNA repair protein, putative                              | -0,3149 | 0,3165     |
| TcCLB.503733.40  | hypothetical protein, conserved                           | -0,3151 | 0,1303     |
| TcCLB.511481.50  | endonuclease III, putative                                | -0,3154 | 0,05586    |
| TcCLB.507805.20  | hypothetical protein                                      | -0,3155 | 0,05071    |
| TcCLB.504137.40  | hypothetical protein, conserved                           | -0,3156 | 0,01792    |
| TcCLB.506941.194 | hypothetical protein, conserved                           | -0,3158 | 0,00007659 |
| TcCLB.510329.60  | RAB GDP dissociation inhibitor alpha, putative            | -0,3158 | 0,0004586  |
| TcCLB.511077.40  | trans-sialidase (pseudogene), putative                    | -0,3158 | 0,4903     |
| TcCLB.511545.40  | ribosomal protein L27, putative                           | -0,3159 | 0,2084     |
| TcCLB.506743.160 | protein kinase, putative                                  | -0,316  | 0,007082   |
| TcCLB.511299.60  | hypothetical protein, conserved                           | -0,3161 | 0,07033    |
| TcCLB.504123.40  | hypothetical protein, conserved                           | -0,3162 | 0,07417    |
| TcCLB.510311.20  | hypothetical protein, conserved                           | -0,3163 | 0,008158   |
| TcCLB.511867.80  | Vacuolar iron transporter 1, putative (VIT1)              | -0,3163 | 0,02713    |
| TcCLB.511153.64  | histone H2B variant, putative                             | -0,3164 | 0,003126   |
| TcCLB.508871.100 | hypothetical protein                                      | -0,3165 | 0,6877     |
| TcCLB.510661.240 | hypothetical protein, conserved                           | -0,3166 | 0,001791   |
| TcCLB.511181.140 | hypothetical protein                                      | -0,3168 | 0,004589   |
| TcCLB.507159.41  | hypothetical protein, conserved                           | -0,3168 | 0,2384     |
| TcCLB.510737.119 | hypothetical protein, conserved                           | -0,3169 | 0,03729    |
| TcCLB.507467.119 | hypothetical protein, conserved                           | -0,3171 | 0,08309    |
| TcCLB.511249.100 | hypothetical protein, conserved                           | -0,3172 | 0,0002048  |
| TcCLB.504057.104 | phosphatidylinositol phosphate kinase alpha (PIPKA)       | -0,3172 | 0,02223    |
| TcCLB.506351.90  | surface protease GP63, putative                           | -0,3172 | 0,09254    |
| TcCLB.510047.70  | hypothetical protein (pseudogene)                         | -0,3172 | 0,5301     |
| TcCLB.509061.20  | hypothetical protein, conserved                           | -0,3173 | 0,03093    |
| TcCLB.504035.80  | hypothetical protein, conserved                           | -0,3173 | 0,1631     |
| TcCLB.506945.200 | mago nashi-like protein, putative                         | -0,3175 | 0,001341   |
| TcCLB.508325.20  | retrotransposon hot spot protein (RHS, pseudogene), putat | -0,3175 | 0,1812     |
| TcCLB.506435.90  | hypothetical protein, conserved                           | -0,3176 | 0,01403    |
| TcCLB.507017.30  | hypothetical protein, conserved                           | -0,3176 | 0,08632    |
| TcCLB.506297.110 | ATPase, putative                                          | -0,3177 | 0,0001514  |
| TcCLB.507611.330 | hypothetical protein, conserved                           | -0,3177 | 0,05185    |
| TcCLB.509065.40  | hypothetical protein, conserved                           | -0,3178 | 0,01933    |
| TcCLB.506459.210 | mucin TcMUCII, putative                                   | -0,3178 | 0,5721     |
| TcCLB.507641.30  | hypothetical protein, conserved                           | -0,3179 | 0,002033   |
| TcCLB.508461.250 | ATP-dependent RNA helicase, putative                      | -0,3181 | 0,0007869  |
| TcCLB.507905.30  | trans-sialidase (pseudogene), putative                    | -0,3181 | 0,001515   |
| TcCLB.503583.60  | hypothetical protein                                      | -0,3181 | 0,00478    |
| TcCLB.509695.190 | cdc2-related kinase 1, putative (CRK1)                    | -0,3181 | 0,01346    |
| TcCLB.508269.76  | N-acetyltransferase complex ARD1 subunit (pseudogene),    | -0,3181 | 0,4036     |
| TcCLB.509419.260 | dispersed gene family protein 1 (DGF-1), putative         | -0,3181 | 0,4227     |
| TcCLB.511881.40  | protein transport protein Sec24C, putative                | -0,3182 | 0,01453    |
| TcCLB.509563.20  | hypothetical protein, conserved                           | -0,3183 | 0,03215    |
| TcCLB.503801.50  | hypothetical protein, conserved                           | -0,3184 | 0,0108     |

|                  |                                                         |         |            |
|------------------|---------------------------------------------------------|---------|------------|
| TcCLB.505987.50  | adenosine kinase, putative                              | -0,3184 | 0,01606    |
| TcCLB.508479.160 | hypothetical protein, conserved                         | -0,3185 | 0,0008797  |
| TcCLB.509647.60  | hypothetical protein, conserved                         | -0,3185 | 0,00199    |
| TcCLB.506265.50  | hypothetical protein, conserved                         | -0,3187 | 0,03582    |
| TcCLB.509591.10  | ubiquitin-conjugating enzyme, putative                  | -0,3187 | 0,05045    |
| TcCLB.509793.40  | kinetoplast-associated protein (TcKAP4)                 | -0,3188 | 0,01619    |
| TcCLB.508659.40  | protein phosphatase 2C-like (pseudogene), putative      | -0,3188 | 0,08864    |
| TcCLB.509749.20  | hypothetical protein, conserved                         | -0,3188 | 0,2037     |
| TcCLB.503453.4   | hypothetical protein, conserved                         | -0,3188 | 0,2607     |
| TcCLB.505999.30  | anti-silencing protein ASF 1, putative                  | -0,3189 | 0,1334     |
| TcCLB.506113.83  | ATP-dependent DEAD/H RNA helicase (pseudogene), putat   | -0,319  | 0,2383     |
| TcCLB.508463.20  | hypothetical protein, conserved                         | -0,3191 | 0,0001172  |
| TcCLB.506195.60  | hypothetical protein, conserved                         | -0,3191 | 0,02755    |
| TcCLB.507033.4   | hypothetical protein, conserved                         | -0,3191 | 0,1143     |
| TcCLB.507011.190 | hypothetical protein, conserved                         | -0,3191 | 0,1387     |
| TcCLB.507787.140 | hypothetical protein, conserved                         | -0,3193 | 0,01422    |
| TcCLB.509693.160 | hypothetical protein, conserved                         | -0,3193 | 0,01618    |
| TcCLB.507801.240 | mucin-associated surface protein (MASP, pseudogene), pu | -0,3193 | 0,3154     |
| TcCLB.509699.140 | mucin-associated surface protein (MASP, pseudogene), pu | -0,3193 | 0,3371     |
| TcCLB.503899.40  | hypothetical protein, conserved                         | -0,3194 | 0,00577    |
| TcCLB.505009.30  | serine/threonine protein kinase, putative               | -0,3194 | 0,1516     |
| TcCLB.506609.50  | hypothetical protein                                    | -0,3195 | 0,5196     |
| TcCLB.511363.10  | hypothetical protein, conserved                         | -0,3196 | 0,001447   |
| TcCLB.506925.50  | hypothetical protein, conserved                         | -0,3196 | 0,003923   |
| TcCLB.511559.20  | hypothetical protein, conserved                         | -0,3197 | 0,001493   |
| TcCLB.509901.150 | hypothetical protein, conserved                         | -0,3197 | 0,1096     |
| TcCLB.510105.33  | RNA-binding protein, putative                           | -0,3197 | 0,2943     |
| TcCLB.506725.10  | hypothetical protein, conserved                         | -0,3198 | 0,03315    |
| TcCLB.509775.40  | iron superoxide dismutase, putative                     | -0,3198 | 0,05056    |
| TcCLB.503669.30  | hypothetical protein, conserved                         | -0,3199 | 0,04814    |
| TcCLB.504047.30  | kinesin, putative                                       | -0,32   | 0,01975    |
| TcCLB.508777.80  | hypothetical protein, conserved                         | -0,3201 | 0,01187    |
| TcCLB.510755.40  | hypothetical protein, conserved                         | -0,3201 | 0,08864    |
| TcCLB.511245.70  | hypothetical protein, conserved                         | -0,3202 | 0,004455   |
| TcCLB.507817.50  | hypothetical protein, conserved                         | -0,3204 | 0,03826    |
| TcCLB.511377.25  | elongation factor 1-gamma (EF-1-gamma, pseudogene), p   | -0,3204 | 0,5462     |
| TcCLB.510687.10  | dynein heavy chain (pseudogene), putative               | -0,3206 | 0,00002326 |
| TcCLB.508629.100 | trans-sialidase (pseudogene), putative                  | -0,3206 | 0,02226    |
| TcCLB.503431.50  | hypothetical protein, conserved                         | -0,3206 | 0,07623    |
| TcCLB.507641.170 | hypothetical protein, conserved                         | -0,3207 | 0,00432    |
| TcCLB.508543.129 | hypothetical protein, conserved                         | -0,3207 | 0,01471    |
| TcCLB.508181.140 | inorganic pyrophosphatase, putative                     | -0,3207 | 0,03392    |
| TcCLB.504153.170 | hypothetical protein, conserved                         | -0,3209 | 4,652E-06  |
| TcCLB.511501.10  | hypothetical protein, conserved                         | -0,321  | 0,00003216 |
| TcCLB.511587.39  | ATP-dependent DEAD/H RNA helicase (pseudogene), putat   | -0,321  | 0,2127     |

|                   |                                                            |         |           |
|-------------------|------------------------------------------------------------|---------|-----------|
| TcCLB.506691.14   | ATP-dependent DEAD/H RNA helicase, putative (fragment)     | -0,3211 | 0,005226  |
| TcCLB.510187.140  | hypothetical protein, conserved                            | -0,3214 | 0,0007199 |
| TcCLB.506755.60   | hypothetical protein, conserved                            | -0,3214 | 0,0972    |
| TcCLB.509163.10   | hypothetical protein                                       | -0,3215 | 0,1329    |
| TcCLB.508307.200  | hypothetical protein, conserved                            | -0,3216 | 0,02808   |
| TcCLB.510517.10   | chaperonin/T-complex protein 1 gamma subunit, putative     | -0,3217 | 0,002233  |
| TcCLB.511283.20   | protein transport protein SEC13, putative                  | -0,3217 | 0,01469   |
| TcCLB.503913.10   | hypothetical protein, conserved                            | -0,3217 | 0,02737   |
| TcCLB.507623.30   | hypothetical protein, conserved                            | -0,3218 | 0,001914  |
| TcCLB.508221.150  | mucin-associated surface protein (MASP), putative          | -0,3218 | 0,5122    |
| TcCLB.511141.10   | hypothetical protein, conserved                            | -0,3219 | 0,1077    |
| TcCLB.506589.130  | trans-sialidase (pseudogene), putative                     | -0,322  | 0,1885    |
| TcCLB.511913.9    | ribonuclease L inhibitor (pseudogene), putative            | -0,3221 | 0,004921  |
| TcCLB.506945.80   | DNA ligase I, putative                                     | -0,3222 | 0,001032  |
| TcCLB.506315.10   | hypothetical protein                                       | -0,3222 | 0,0368    |
| TcCLB.505949.30   | trans-sialidase, Group V, putative                         | -0,3222 | 0,4185    |
| TcCLB.508699.30   | hypothetical protein, conserved                            | -0,3223 | 0,07717   |
| TcCLB.504097.40   | hypothetical protein, conserved                            | -0,3224 | 0,005981  |
| TcCLB.506195.100  | malate dehydrogenase (pseudogene), putative                | -0,3224 | 0,04378   |
| TcCLB.509751.10   | hypothetical protein, conserved                            | -0,3226 | 0,07079   |
| TcCLB.511003.180  | hypothetical protein, conserved                            | -0,3226 | 0,1121    |
| TcCLB.509831.20   | vesicular-fusion ATPase-like protein, putative             | -0,3227 | 0,001286  |
| TcCLB.507711.150  | Ubiquitin-like modifier-activating enzyme ATG7, putative ( | -0,3227 | 0,008789  |
| TcCLB.509429.41   | trans-sialidase (pseudogene), putative                     | -0,3229 | 0,2291    |
| TcCLB.508153.1140 | hypothetical protein, conserved                            | -0,323  | 0,02567   |
| TcCLB.510729.90   | hypothetical protein, conserved                            | -0,3231 | 0,00825   |
| TcCLB.506287.170  | hypothetical protein, conserved                            | -0,3232 | 0,002271  |
| TcCLB.508799.40   | hypothetical protein, conserved                            | -0,3232 | 0,003679  |
| TcCLB.510943.170  | hypothetical protein, conserved                            | -0,3232 | 0,006021  |
| TcCLB.503841.40   | actin, putative                                            | -0,3232 | 0,02839   |
| TcCLB.506817.70   | hypothetical protein                                       | -0,3232 | 0,2574    |
| TcCLB.509779.30   | hypothetical protein, conserved                            | -0,3233 | 0,01571   |
| TcCLB.507809.50   | hypothetical protein, conserved                            | -0,3233 | 0,07613   |
| TcCLB.507831.100  | hypothetical protein, conserved                            | -0,3234 | 0,01777   |
| TcCLB.505615.10   | surface protease GP63, putative                            | -0,3234 | 0,06222   |
| TcCLB.503489.24   | hypothetical protein, conserved                            | -0,3235 | 0,0004344 |
| TcCLB.508061.50   | dispersed gene family protein 1 (DGF-1), putative          | -0,3236 | 0,02893   |
| TcCLB.509027.30   | hypothetical protein, conserved                            | -0,3237 | 0,04739   |
| TcCLB.506413.50   | hypothetical protein, conserved                            | -0,3238 | 0,02632   |
| TcCLB.504167.40   | ubiquitin fusion degradation protein, putative             | -0,3238 | 0,02896   |
| TcCLB.507087.50   | hypothetical protein, conserved                            | -0,3238 | 0,03749   |
| TcCLB.509037.30   | hypothetical protein, conserved                            | -0,3239 | 0,0325    |
| TcCLB.510407.60   | tyrosyl-tRNA synthetase (pseudogene), putative             | -0,324  | 0,0001608 |
| TcCLB.507021.10   | hypothetical protein, conserved                            | -0,324  | 0,0136    |
| TcCLB.440363.10   | hypothetical protein, conserved                            | -0,324  | 0,1176    |

|                  |                                                         |         |           |
|------------------|---------------------------------------------------------|---------|-----------|
| TcCLB.508641.250 | hypothetical protein                                    | -0,3241 | 0,002264  |
| TcCLB.508489.20  | hypothetical protein, conserved                         | -0,3242 | 0,02199   |
| TcCLB.506763.361 | syntaxin binding protein (pseudogene), putative         | -0,3243 | 0,5323    |
| TcCLB.508153.20  | vacuolar protein sorting-associated protein, putative   | -0,3244 | 0,0001968 |
| TcCLB.511067.10  | tubulin folding cofactor D, putative                    | -0,3244 | 0,0002033 |
| TcCLB.508357.9   | hypothetical protein, conserved (fragment)              | -0,3244 | 0,003506  |
| TcCLB.506629.220 | isovaleryl-coA dehydrogenase, putative                  | -0,3244 | 0,005329  |
| TcCLB.503453.80  | hypothetical protein, conserved                         | -0,3244 | 0,0377    |
| TcCLB.511361.80  | hypothetical protein, conserved                         | -0,3244 | 0,03813   |
| TcCLB.508805.110 | hypothetical protein                                    | -0,3244 | 0,3571    |
| TcCLB.510311.160 | hypothetical protein, conserved                         | -0,3245 | 0,02161   |
| TcCLB.511665.50  | dispersed gene family protein 1 (DGF-1), putative       | -0,3245 | 0,07743   |
| TcCLB.509269.19  | sphingosine-1-phosphate phosphatase, putative           | -0,3246 | 0,006508  |
| TcCLB.511517.170 | hypothetical protein, conserved                         | -0,3246 | 0,007346  |
| TcCLB.506945.120 | chromosomal passenger protein, putative (CPC1)          | -0,3246 | 0,01649   |
| TcCLB.508577.80  | hypothetical protein, conserved                         | -0,3246 | 0,09851   |
| TcCLB.510377.310 | mucin-associated surface protein (MASP, pseudogene), pu | -0,3246 | 0,569     |
| TcCLB.511877.30  | surface protease GP63 (pseudogene), putative            | -0,3247 | 0,2284    |
| TcCLB.506247.100 | hypothetical protein, conserved                         | -0,3248 | 0,08202   |
| TcCLB.510565.110 | hypothetical protein                                    | -0,3248 | 0,1404    |
| TcCLB.507611.290 | acetyltransferase, putative                             | -0,3249 | 0,04733   |
| TcCLB.508469.20  | hypothetical protein, conserved                         | -0,3249 | 0,05198   |
| TcCLB.511423.170 | chaperone DNAJ protein, putative                        | -0,3249 | 0,08124   |
| TcCLB.506913.20  | protein kinase, putative (fragment)                     | -0,3249 | 0,2315    |
| TcCLB.511767.10  | trans-sialidase, putative                               | -0,325  | 0,3784    |
| TcCLB.511585.20  | KREL1                                                   | -0,3252 | 0,001998  |
| TcCLB.503779.40  | protein-l-isoaspartate o-methyltransferase, putative    | -0,3252 | 0,01177   |
| TcCLB.508479.350 | hypothetical protein, conserved                         | -0,3253 | 0,002142  |
| TcCLB.507467.20  | hypothetical protein, conserved                         | -0,3253 | 0,0151    |
| TcCLB.509617.89  | Zn-finger protein, putative (fragment)                  | -0,3254 | 0,02831   |
| TcCLB.457339.19  | hypothetical protein, conserved                         | -0,3254 | 0,1196    |
| TcCLB.510325.69  | Aminopeptidase M1, putative (fragment)                  | -0,3255 | 0,00147   |
| TcCLB.506681.20  | hypothetical protein, conserved                         | -0,3256 | 0,0007858 |
| TcCLB.510769.30  | hypothetical protein, conserved                         | -0,3256 | 0,003504  |
| TcCLB.509573.50  | hypothetical protein, conserved                         | -0,3257 | 0,000447  |
| TcCLB.510745.49  | hypothetical protein, conserved (fragment)              | -0,3257 | 0,1799    |
| TcCLB.510243.100 | chloride channel protein, putative                      | -0,3258 | 0,002717  |
| TcCLB.503559.100 | long-chain-fatty-acid-CoA ligase, putative              | -0,3258 | 0,004166  |
| TcCLB.503897.130 | hypothetical protein, conserved                         | -0,3258 | 0,04096   |
| TcCLB.507257.130 | hypothetical protein, conserved                         | -0,3258 | 0,05155   |
| TcCLB.506629.100 | hypothetical protein                                    | -0,3259 | 0,004393  |
| TcCLB.510729.30  | hypothetical protein, conserved                         | -0,3259 | 0,06109   |
| TcCLB.509633.10  | hypothetical protein, conserved                         | -0,3259 | 0,08614   |
| TcCLB.511473.9   | N-acetyltransferase complex ARD1 subunit (pseudogene),  | -0,326  | 0,2638    |
| TcCLB.511245.110 | hypothetical protein, conserved                         | -0,3261 | 0,003456  |

|                  |                                                                |         |            |
|------------------|----------------------------------------------------------------|---------|------------|
| TcCLB.506885.290 | DNA replication licensing factor MCM9, putative                | -0,3261 | 0,005612   |
| TcCLB.511173.190 | trans-sialidase (pseudogene), putative                         | -0,3261 | 0,4036     |
| TcCLB.508409.100 | hypothetical protein, conserved                                | -0,3262 | 0,00007568 |
| TcCLB.506559.180 | hypothetical protein, conserved                                | -0,3262 | 0,003808   |
| TcCLB.506289.60  | hypothetical protein, conserved                                | -0,3262 | 0,04739    |
| TcCLB.511665.15  | dispersed gene family protein 1 (DGF-1), putative (fragme      | -0,3262 | 0,3473     |
| TcCLB.506557.24  | hypothetical protein, conserved                                | -0,3263 | 0,1313     |
| TcCLB.511183.570 | syntaxin binding protein (pseudogene), putative                | -0,3263 | 0,4819     |
| TcCLB.506165.10  | hypothetical protein, conserved                                | -0,3264 | 0,01319    |
| TcCLB.508405.20  | TBC1 domain family member 20/GTPase, putative                  | -0,3264 | 0,08857    |
| TcCLB.506897.10  | mucin TcMUCII, putative                                        | -0,3264 | 0,5496     |
| TcCLB.504163.110 | N-acetyltransferase subunit Nat1, putative                     | -0,3265 | 0,0009643  |
| TcCLB.508949.40  | hypothetical protein, conserved                                | -0,3265 | 0,05239    |
| TcCLB.508277.300 | hypothetical protein, conserved                                | -0,3265 | 0,05392    |
| TcCLB.508707.64  | exonuclease, putative                                          | -0,3265 | 0,09268    |
| TcCLB.508871.20  | mucin TcMUCII, putative                                        | -0,3265 | 0,5846     |
| TcCLB.508257.40  | hypothetical protein, conserved                                | -0,3269 | 0,01185    |
| TcCLB.510659.194 | hypothetical protein, conserved                                | -0,3269 | 0,0207     |
| TcCLB.509321.19  | GTP-binding protein, putative                                  | -0,3269 | 0,02391    |
| TcCLB.508405.50  | hypothetical protein, conserved                                | -0,3269 | 0,05144    |
| TcCLB.508647.130 | hypothetical protein, conserved                                | -0,327  | 0,01577    |
| TcCLB.505171.50  | ras-related GTP-binding protein, putative                      | -0,327  | 0,09943    |
| TcCLB.508479.240 | hypothetical protein, conserved                                | -0,3271 | 0,003829   |
| TcCLB.506227.140 | hypothetical protein, conserved                                | -0,3272 | 0,05741    |
| TcCLB.508661.10  | Eukaryotic translation initiation factor 4E type 5, putative ( | -0,3273 | 0,005922   |
| TcCLB.510729.180 | hypothetical protein                                           | -0,3273 | 0,006441   |
| TcCLB.510299.79  | protein phosphatase 2C, putative                               | -0,3273 | 0,01893    |
| TcCLB.509793.60  | hypothetical protein, conserved                                | -0,3274 | 0,01668    |
| TcCLB.508409.220 | hypothetical protein, conserved                                | -0,3274 | 0,01733    |
| TcCLB.505939.40  | hypothetical protein, conserved                                | -0,3274 | 0,02501    |
| TcCLB.508303.65  | thioredoxin-like protein, putative                             | -0,3274 | 0,04187    |
| TcCLB.506589.140 | mucin-associated surface protein (MASP), putative              | -0,3274 | 0,2858     |
| TcCLB.503897.80  | deaminase, putative                                            | -0,3275 | 0,1026     |
| TcCLB.511523.30  | hypothetical protein                                           | -0,3276 | 0,004019   |
| TcCLB.506599.270 | mucin TcMUCII, putative                                        | -0,3276 | 0,5796     |
| TcCLB.508139.170 | retrotransposon hot spot protein (RHS, pseudogene), putat      | -0,3279 | 0,01996    |
| TcCLB.511731.40  | hypothetical protein, conserved                                | -0,3281 | 0,004597   |
| TcCLB.511575.100 | protein transport protein SEC23, putative                      | -0,3282 | 0,0001548  |
| TcCLB.508059.30  | hypothetical protein, conserved                                | -0,3282 | 0,0105     |
| TcCLB.449247.4   | serine/threonine protein phosphatase, putative (fragment)      | -0,3283 | 0,0312     |
| TcCLB.503401.20  | hypothetical protein, conserved                                | -0,3283 | 0,09845    |
| TcCLB.508827.44  | hypothetical protein, conserved                                | -0,3284 | 0,02408    |
| TcCLB.509593.59  | dispersed gene family protein 1 (DGF-1), putative              | -0,3284 | 0,6426     |
| TcCLB.509607.30  | splicing factor TSR1, putative                                 | -0,3285 | 0,002364   |
| TcCLB.510519.120 | hypothetical protein, conserved                                | -0,3285 | 0,007208   |

|                  |                                                             |         |            |
|------------------|-------------------------------------------------------------|---------|------------|
| TcCLB.506943.120 | hypothetical protein, conserved                             | -0,3286 | 0,0253     |
| TcCLB.503599.20  | hypothetical protein, conserved                             | -0,3286 | 0,09617    |
| TcCLB.428999.20  | receptor-type adenylate cyclase, putative                   | -0,3286 | 0,1401     |
| TcCLB.506253.21  | hypothetical protein, conserved                             | -0,3286 | 0,5513     |
| TcCLB.511255.65  | surface protease GP63 (pseudogene), putative                | -0,3287 | 0,545      |
| TcCLB.511729.60  | MORN repeat-containing protein 1 (MORN1)                    | -0,3288 | 0,0007397  |
| TcCLB.509429.240 | hypothetical protein, conserved                             | -0,3288 | 0,01094    |
| TcCLB.510091.40  | Mad2-like HORMA domain containing protein (mad2)            | -0,3288 | 0,01166    |
| TcCLB.511555.40  | CPSF 30 kDa subunit, putative (CPSF30)                      | -0,3288 | 0,01852    |
| TcCLB.508807.5   | glycosylphosphatidylinositol-specific phospholipase C, puta | -0,3288 | 0,09558    |
| TcCLB.507993.340 | hypothetical protein                                        | -0,3288 | 0,2225     |
| TcCLB.507805.30  | hypothetical protein, conserved (pseudogene)                | -0,3288 | 0,2308     |
| TcCLB.510659.120 | dolichol kinase, putative                                   | -0,3289 | 0,001388   |
| TcCLB.509979.230 | hypothetical protein, conserved                             | -0,3289 | 0,04395    |
| TcCLB.510625.130 | hypothetical protein                                        | -0,3289 | 0,6099     |
| TcCLB.402647.9   | hypothetical protein, conserved                             | -0,329  | 0,05318    |
| TcCLB.506989.199 | hypothetical protein, conserved                             | -0,329  | 0,1602     |
| TcCLB.507681.160 | 40S ribosomal protein S24E, putative                        | -0,3291 | 0,005486   |
| TcCLB.509683.100 | hypothetical protein, conserved                             | -0,3291 | 0,01805    |
| TcCLB.511553.140 | mucin-associated surface protein (MASP), putative           | -0,3291 | 0,5202     |
| TcCLB.509261.10  | p-nitrophenylphosphatase, putative                          | -0,3292 | 0,02624    |
| TcCLB.510697.25  | surface protease GP63 (pseudogene), putative                | -0,3294 | 0,3481     |
| TcCLB.510889.160 | cell division control protein (pseudogene), putative        | -0,3295 | 0,01166    |
| TcCLB.509589.10  | mitochondrial DNA polymerase I protein D, putative          | -0,3295 | 0,0171     |
| TcCLB.511043.60  | receptor-type adenylate cyclase, putative                   | -0,3295 | 0,03664    |
| TcCLB.506791.10  | CYC2-like cyclin 4, putative (CYC4)                         | -0,3296 | 0,006236   |
| TcCLB.506977.80  | hypothetical protein, conserved                             | -0,3297 | 0,00009489 |
| TcCLB.508647.270 | malic enzyme, putative                                      | -0,3297 | 0,00009886 |
| TcCLB.507257.40  | hypothetical protein, conserved                             | -0,3297 | 0,1672     |
| TcCLB.508121.130 | mucin-associated surface protein (MASP, pseudogene), pu     | -0,3297 | 0,2566     |
| TcCLB.511145.43  | proteasome subunit alpha type-5, putative                   | -0,3299 | 0,01265    |
| TcCLB.506297.140 | hypothetical protein, conserved                             | -0,3299 | 0,02832    |
| TcCLB.509049.40  | hypothetical protein, conserved                             | -0,3299 | 0,03536    |
| TcCLB.503395.30  | hypothetical protein, conserved                             | -0,33   | 0,006076   |
| TcCLB.506733.10  | hypothetical protein, conserved                             | -0,33   | 0,04228    |
| TcCLB.507997.54  | Alpha/beta hydrolase domain-containing protein              | -0,3301 | 0,01075    |
| TcCLB.509213.10  | hypothetical protein, conserved                             | -0,3302 | 0,05818    |
| TcCLB.510421.80  | hypothetical protein                                        | -0,3302 | 0,1175     |
| TcCLB.507629.20  | hypothetical protein, conserved                             | -0,3303 | 0,00005501 |
| TcCLB.511627.60  | vesicle-associated membrane protein                         | -0,3303 | 0,01319    |
| TcCLB.503931.46  | hypothetical protein, conserved (pseudogene)                | -0,3303 | 0,294      |
| TcCLB.508951.4   | protein kinase, putative (fragment)                         | -0,3303 | 0,3124     |
| TcCLB.506739.50  | ATP-dependent protease ATPase subunit HslU1, putative (I    | -0,3304 | 0,0001534  |
| TcCLB.510285.90  | hypothetical protein, conserved                             | -0,3304 | 0,009765   |
| TcCLB.511407.70  | hypothetical protein, conserved                             | -0,3306 | 0,002011   |

|                  |                                                           |         |            |
|------------------|-----------------------------------------------------------|---------|------------|
| TcCLB.510545.30  | mucin-associated surface protein (MASP, pseudogene), pu   | -0,3306 | 0,4243     |
| TcCLB.507857.70  | hypothetical protein, conserved                           | -0,3307 | 0,00833    |
| TcCLB.503913.49  | hypothetical protein, conserved (fragment)                | -0,3307 | 0,4242     |
| TcCLB.507793.30  | hypothetical protein, conserved                           | -0,3308 | 0,02993    |
| TcCLB.507673.65  | DNA-directed RNA polymerase subunit, putative             | -0,3308 | 0,5515     |
| TcCLB.506973.20  | mucin-associated surface protein (MASP), putative         | -0,3309 | 0,1931     |
| TcCLB.510693.270 | trans-sialidase, Group VI, putative                       | -0,3309 | 0,4197     |
| TcCLB.511877.15  | elongation factor 1-gamma (EF-1-gamma, pseudogene), p     | -0,331  | 0,1269     |
| TcCLB.509453.20  | hypothetical protein, conserved                           | -0,3312 | 0,1783     |
| TcCLB.504133.30  | tyrosine protein kinase, putative                         | -0,3313 | 0,001383   |
| TcCLB.503843.10  | hypothetical protein, conserved                           | -0,3313 | 0,007048   |
| TcCLB.508425.31  | hypothetical protein, conserved (pseudogene)              | -0,3313 | 0,04297    |
| TcCLB.507641.130 | hypothetical protein, conserved                           | -0,3313 | 0,05822    |
| TcCLB.504213.130 | hypothetical protein, conserved                           | -0,3314 | 0,06472    |
| TcCLB.506009.109 | hypothetical protein, conserved                           | -0,3314 | 0,08847    |
| TcCLB.510371.5   | elongation factor 1-gamma (EF-1-gamma, pseudogene), p     | -0,3314 | 0,5423     |
| TcCLB.434259.10  | RNA polymerase-associated protein CTR9, putative          | -0,3315 | 0,033      |
| TcCLB.511517.10  | hypothetical protein, conserved                           | -0,3315 | 0,03595    |
| TcCLB.508859.109 | exosome complex exonuclease, putative                     | -0,3315 | 0,08775    |
| TcCLB.509897.140 | trans-sialidase, Group V, putative                        | -0,3315 | 0,124      |
| TcCLB.503827.60  | mucin-associated surface protein (MASP), putative         | -0,3316 | 0,3916     |
| TcCLB.508693.10  | cleavage and polyadenylation specificity factor, putative | -0,3318 | 0,0001544  |
| TcCLB.509733.130 | hypothetical protein, conserved                           | -0,3318 | 0,002273   |
| TcCLB.510821.20  | hypothetical protein, conserved                           | -0,3319 | 0,00004011 |
| TcCLB.510123.30  | DNA repair protein, putative                              | -0,3319 | 0,02845    |
| TcCLB.507757.21  | hypothetical protein, conserved                           | -0,332  | 0,1656     |
| TcCLB.506601.21  | syntaxin binding protein (pseudogene), putative           | -0,332  | 0,5327     |
| TcCLB.511075.40  | cullin, putative                                          | -0,3321 | 0,001101   |
| TcCLB.510115.30  | trans-sialidase, Group VI, putative                       | -0,3321 | 0,1136     |
| TcCLB.509381.10  | mitochondrial import receptor subunit, putative           | -0,3322 | 0,004674   |
| TcCLB.506195.260 | hypothetical protein                                      | -0,3322 | 0,01053    |
| TcCLB.510533.130 | hypothetical protein, conserved                           | -0,3323 | 0,009664   |
| TcCLB.506833.79  | hypothetical protein, conserved (fragment)                | -0,3324 | 0,005085   |
| TcCLB.510519.70  | mitochondrial RNA binding complex 1 subunit, putative     | -0,3324 | 0,01108    |
| TcCLB.508479.230 | peroxin-2, putative                                       | -0,3324 | 0,02555    |
| TcCLB.507681.90  | hypothetical protein, conserved                           | -0,3325 | 0,006326   |
| TcCLB.511055.40  | glycine dehydrogenase [decarboxylating] (pseudogene), pu  | -0,3325 | 0,04957    |
| TcCLB.506661.110 | hypothetical protein, conserved                           | -0,3326 | 0,0001908  |
| TcCLB.510359.130 | hypothetical protein, conserved                           | -0,3326 | 0,01949    |
| TcCLB.509023.190 | hypothetical protein, conserved                           | -0,3326 | 0,1685     |
| TcCLB.506269.50  | mucin-associated surface protein (MASP, pseudogene), pu   | -0,3326 | 0,406      |
| TcCLB.507017.90  | hypothetical protein, conserved                           | -0,3327 | 0,04498    |
| TcCLB.509099.5   | NUP-1 protein, putative (fragment)                        | -0,3328 | 0,02953    |
| TcCLB.506111.10  | retrotransposon hot spot protein (RHS, pseudogene), putat | -0,3328 | 0,03341    |
| TcCLB.506733.40  | katanin-like protein, putative                            | -0,3328 | 0,03485    |



|                  |                                                           |         |            |
|------------------|-----------------------------------------------------------|---------|------------|
| TcCLB.510765.20  | hypothetical protein, conserved                           | -0,3328 | 0,1543     |
| TcCLB.508289.94  | hypothetical protein, conserved (pseudogene)              | -0,3328 | 0,6033     |
| TcCLB.507099.140 | endomembrane protein, putative                            | -0,3329 | 0,0001866  |
| TcCLB.504057.21  | hypothetical protein, conserved                           | -0,3331 | 0,01665    |
| TcCLB.506315.80  | hypothetical protein, conserved                           | -0,3332 | 0,01216    |
| TcCLB.505963.9   | dispersed gene family protein 1 (DGF-1), putative (fragme | -0,3332 | 0,2104     |
| TcCLB.510181.69  | hypothetical protein, conserved                           | -0,3333 | 0,0309     |
| TcCLB.506257.70  | hypothetical protein, conserved                           | -0,3335 | 0,01868    |
| TcCLB.507807.10  | hypothetical protein, conserved                           | -0,3337 | 0,0001358  |
| TcCLB.508303.4   | ubiquitin-protein ligase, putative                        | -0,3337 | 0,01041    |
| TcCLB.507037.20  | RNA-binding protein, putative                             | -0,3337 | 0,01569    |
| TcCLB.503463.30  | protein kinase, putative                                  | -0,3337 | 0,0287     |
| TcCLB.508911.20  | hypothetical protein, conserved                           | -0,3339 | 0,0548     |
| TcCLB.507047.170 | hypothetical protein, conserved                           | -0,3339 | 0,224      |
| TcCLB.511169.20  | hypothetical protein, conserved                           | -0,334  | 0,03046    |
| TcCLB.506309.110 | mucin TcMUCII, putative                                   | -0,3341 | 0,5156     |
| TcCLB.511751.200 | epsilon-adaptin, putative                                 | -0,3342 | 0,001463   |
| TcCLB.506839.14  | hypothetical protein, conserved                           | -0,3342 | 0,007353   |
| TcCLB.503759.30  | trans-sialidase, putative                                 | -0,3342 | 0,447      |
| TcCLB.508269.60  | exosome-associated protein 4, putative (EAP4)             | -0,3343 | 0,1255     |
| TcCLB.511585.140 | hypothetical protein, conserved                           | -0,3344 | 0,000739   |
| TcCLB.509965.90  | hypothetical protein, conserved                           | -0,3344 | 0,001072   |
| TcCLB.432787.10  | mitochondrial RNA binding complex 1 subunit, putative (fr | -0,3344 | 0,05299    |
| TcCLB.506741.120 | mucin-associated surface protein (MASP), putative         | -0,3344 | 0,4537     |
| TcCLB.509499.14  | peroxidoxin                                               | -0,3345 | 0,0001801  |
| TcCLB.510533.230 | palmitoyl acyltransferase 11, putative                    | -0,3346 | 0,04166    |
| TcCLB.504069.110 | hypothetical protein, conserved                           | -0,3346 | 0,1092     |
| TcCLB.506067.230 | trans-sialidase (pseudogene), putative                    | -0,3346 | 0,3388     |
| TcCLB.510965.5   | elongation factor 2, putative (fragment)                  | -0,3347 | 0,00006688 |
| TcCLB.509567.10  | hypothetical protein, conserved                           | -0,3348 | 0,02025    |
| TcCLB.510735.9   | hypothetical protein, conserved                           | -0,3349 | 0,001418   |
| TcCLB.509103.10  | hypothetical protein, conserved                           | -0,3349 | 0,01174    |
| TcCLB.507943.60  | hypothetical protein, conserved                           | -0,3349 | 0,01299    |
| TcCLB.504235.9   | hypothetical protein, conserved (fragment)                | -0,335  | 0,1597     |
| TcCLB.511201.19  | hypothetical protein (fragment)                           | -0,3352 | 0,02031    |
| TcCLB.506925.104 | dynein light chain, putative                              | -0,3354 | 0,000135   |
| TcCLB.506855.340 | U4/U6 small nuclear ribonuclear protein, putative         | -0,3354 | 0,01673    |
| TcCLB.510519.130 | hypothetical protein, conserved                           | -0,3354 | 0,02795    |
| TcCLB.510645.49  | ribosomal protein L3 mitochondrial, putative              | -0,3355 | 0,1029     |
| TcCLB.507025.30  | hypothetical protein, conserved                           | -0,3357 | 0,05199    |
| TcCLB.510733.54  | hypothetical protein, conserved                           | -0,3357 | 0,07488    |
| TcCLB.511629.40  | hypothetical protein, conserved                           | -0,3357 | 0,08209    |
| TcCLB.432867.20  | hypothetical protein, conserved                           | -0,3357 | 0,2547     |
| TcCLB.508393.9   | dispersed gene family protein 1 (DGF-1), putative         | -0,3358 | 0,6352     |
| TcCLB.509805.20  | cAMP phosphodiesterase A, putative (PDEA)                 | -0,3359 | 0,04373    |

|                  |                                                          |         |            |
|------------------|----------------------------------------------------------|---------|------------|
| TcCLB.511367.354 | U1 small nuclear ribonucleoprotein C, putative           | -0,336  | 0,05602    |
| TcCLB.508541.210 | hypothetical protein, conserved                          | -0,3361 | 0,006192   |
| TcCLB.506637.60  | hypothetical protein, conserved                          | -0,3361 | 0,03428    |
| TcCLB.510755.147 | hypothetical protein, conserved                          | -0,3361 | 0,07033    |
| TcCLB.509613.20  | trans-sialidase (pseudogene), putative                   | -0,3362 | 0,306      |
| TcCLB.508577.140 | cyclophilin, putative                                    | -0,3363 | 0,001389   |
| TcCLB.467795.9   | diphthamide synthesis protein, putative                  | -0,3363 | 0,01121    |
| TcCLB.504081.295 | surface protease GP63 (pseudogene), putative             | -0,3363 | 0,532      |
| TcCLB.508505.30  | hypothetical protein, conserved                          | -0,3365 | 0,006896   |
| TcCLB.509913.20  | hypothetical protein, conserved                          | -0,3365 | 0,007435   |
| TcCLB.508261.29  | mucin TcMUCII (pseudogene), putative                     | -0,3365 | 0,6033     |
| TcCLB.508897.20  | signal recognition particle protein, putative            | -0,3366 | 0,00006265 |
| TcCLB.506679.160 | intraflagellar transport protein 122, putative (IFT122)  | -0,3366 | 0,0002421  |
| TcCLB.511365.50  | hypothetical protein, conserved (pseudogene)             | -0,3366 | 0,002599   |
| TcCLB.506419.10  | ribosomal protein L7/L12, putative                       | -0,3367 | 0,04873    |
| TcCLB.511867.209 | dynein heavy chain, putative (fragment)                  | -0,3368 | 0,004175   |
| TcCLB.508769.10  | hypothetical protein, conserved (pseudogene)             | -0,3368 | 0,008174   |
| TcCLB.510637.9   | dispersed gene family protein 1 (DGF-1), putative        | -0,3369 | 0,1238     |
| TcCLB.509683.60  | hypothetical protein, conserved                          | -0,337  | 0,01775    |
| TcCLB.507807.40  | hypothetical protein, conserved                          | -0,3371 | 0,004849   |
| TcCLB.510355.269 | cytochrome b5, putative                                  | -0,3371 | 0,1563     |
| TcCLB.506649.64  | hypothetical protein, conserved                          | -0,3371 | 0,1935     |
| TcCLB.505807.140 | hypothetical protein, conserved                          | -0,3372 | 0,002273   |
| TcCLB.506265.200 | hypothetical protein, conserved                          | -0,3372 | 0,08251    |
| TcCLB.507639.60  | hypothetical protein, conserved                          | -0,3373 | 0,005964   |
| TcCLB.509991.90  | RNA-editing nuclease 1 (KREN1)                           | -0,3373 | 0,01529    |
| TcCLB.410199.10  | hypothetical protein                                     | -0,3373 | 0,07438    |
| TcCLB.506341.10  | N-acetylglucosamine-6-phosphate deacetylase-like proteir | -0,3376 | 0,0199     |
| TcCLB.508857.110 | hypothetical protein, conserved                          | -0,3377 | 0,08833    |
| TcCLB.508707.220 | hypothetical protein                                     | -0,3378 | 0,00989    |
| TcCLB.508461.200 | hypothetical protein, conserved                          | -0,3378 | 0,01264    |
| TcCLB.508277.401 | magnesium and cobalt transport protein, putative (fragme | -0,3378 | 0,01676    |
| TcCLB.508997.20  | phosphatidylinositol 3-kinase, putative                  | -0,338  | 0,0005001  |
| TcCLB.511733.80  | hypothetical protein                                     | -0,338  | 0,00236    |
| TcCLB.510963.90  | elongation factor 2, putative                            | -0,3381 | 1,902E-06  |
| TcCLB.510131.10  | hypothetical protein, conserved                          | -0,3382 | 0,003894   |
| TcCLB.508933.20  | dihydrolipoamide dehydrogenase, putative                 | -0,3382 | 0,0316     |
| TcCLB.509685.20  | syntaxin binding protein (pseudogene), putative          | -0,3383 | 0,4571     |
| TcCLB.503781.60  | tRNA pseudouridine synthase A, putative                  | -0,3385 | 0,008923   |
| TcCLB.507669.84  | ATP-dependent DEAD/H RNA helicase, putative              | -0,3387 | 0,0009042  |
| TcCLB.509505.89  | hypothetical protein, conserved                          | -0,3387 | 0,02533    |
| TcCLB.510283.100 | hypothetical protein, conserved                          | -0,3387 | 0,1684     |
| TcCLB.508153.440 | polynucleotide adenylyltransferase, putative (PAP)       | -0,3388 | 0,01047    |
| TcCLB.511893.20  | hypothetical protein, conserved                          | -0,3388 | 0,5921     |
| TcCLB.510877.30  | hypothetical protein, conserved                          | -0,339  | 0,00001351 |

|                  |                                                           |         |            |
|------------------|-----------------------------------------------------------|---------|------------|
| TcCLB.508479.213 | hypothetical protein, conserved                           | -0,339  | 0,1418     |
| TcCLB.508479.465 | ATP-dependent DEAD/H RNA helicase (pseudogene), putat     | -0,339  | 0,3463     |
| TcCLB.508277.290 | hypothetical protein, conserved                           | -0,3391 | 8,853E-06  |
| TcCLB.510357.80  | hypothetical protein, conserved                           | -0,3391 | 0,01055    |
| TcCLB.508851.100 | cyclophilin-like protein, putative                        | -0,3391 | 0,0926     |
| TcCLB.511283.200 | hypothetical protein, conserved                           | -0,3392 | 0,0002142  |
| TcCLB.510719.180 | hypothetical protein, conserved                           | -0,3392 | 0,002745   |
| TcCLB.509065.30  | hypothetical protein, conserved                           | -0,3392 | 0,006098   |
| TcCLB.507445.20  | trans-sialidase (pseudogene), putative                    | -0,3392 | 0,02228    |
| TcCLB.506963.60  | hypothetical protein, conserved (pseudogene)              | -0,3392 | 0,02998    |
| TcCLB.506855.100 | hypothetical protein, conserved                           | -0,3392 | 0,04067    |
| TcCLB.511217.180 | hypothetical protein, conserved                           | -0,3393 | 0,004331   |
| TcCLB.503395.59  | hypothetical protein, conserved (fragment)                | -0,3393 | 0,2658     |
| TcCLB.506737.135 | hypothetical protein, conserved (pseudogene)              | -0,3395 | 0,03417    |
| TcCLB.508777.200 | hypothetical protein, conserved                           | -0,3395 | 0,246      |
| TcCLB.509179.30  | hypothetical protein, conserved                           | -0,3396 | 0,01948    |
| TcCLB.505987.70  | phosphatidylinositol 4-kinase, putative                   | -0,3396 | 0,03037    |
| TcCLB.510431.230 | hypothetical protein, conserved                           | -0,3397 | 0,006516   |
| TcCLB.508303.44  | hypothetical protein, conserved                           | -0,3398 | 0,07177    |
| TcCLB.506649.90  | hypothetical protein, conserved                           | -0,3399 | 5,423E-07  |
| TcCLB.510719.80  | hypothetical protein, conserved                           | -0,3399 | 1,827E-06  |
| TcCLB.504867.120 | hypothetical protein                                      | -0,3399 | 0,0002395  |
| TcCLB.504021.60  | hypothetical protein, conserved                           | -0,34   | 0,01929    |
| TcCLB.507731.50  | trans-sialidase (pseudogene), putative                    | -0,34   | 0,4986     |
| TcCLB.510377.405 | hypothetical protein, conserved (pseudogene)              | -0,34   | 0,5892     |
| TcCLB.511255.280 | mucin-associated surface protein (MASP), putative         | -0,3402 | 0,3338     |
| TcCLB.510573.19  | hypothetical protein, conserved                           | -0,3403 | 0,05522    |
| TcCLB.508445.50  | hypothetical protein, conserved                           | -0,3403 | 0,1029     |
| TcCLB.511737.3   | superoxide dismutase, putative                            | -0,3405 | 0,156      |
| TcCLB.509017.50  | hypothetical protein, conserved                           | -0,3407 | 0,0001488  |
| TcCLB.508919.100 | hypothetical protein, conserved                           | -0,3408 | 0,005951   |
| TcCLB.507129.40  | hypothetical protein, conserved                           | -0,3408 | 0,1074     |
| TcCLB.507053.209 | Cytoplasmic dynein 2 heavy chain (DYNC2H1), putative      | -0,3409 | 0,00007252 |
| TcCLB.506181.40  | hypothetical protein, conserved                           | -0,3409 | 0,005281   |
| TcCLB.506865.79  | hypothetical protein, conserved (fragment)                | -0,3411 | 0,4609     |
| TcCLB.504105.120 | hypothetical protein, conserved                           | -0,3414 | 0,00001069 |
| TcCLB.509937.10  | poly(A) polymerase, putative                              | -0,3414 | 0,01635    |
| TcCLB.404845.10  | trans-sialidase (pseudogene), putative                    | -0,3415 | 0,02904    |
| TcCLB.506583.10  | U2 small nuclear ribonucleoprotein 16.5K, putative        | -0,3415 | 0,02999    |
| TcCLB.509735.100 | trans-sialidase (pseudogene), putative                    | -0,3415 | 0,0749     |
| TcCLB.506177.120 | hypothetical protein                                      | -0,3416 | 0,03014    |
| TcCLB.511543.40  | hypothetical protein, conserved                           | -0,3418 | 0,002558   |
| TcCLB.508851.79  | hypothetical protein, conserved                           | -0,3418 | 0,03014    |
| TcCLB.509485.20  | retrotransposon hot spot protein (RHS, pseudogene), putat | -0,3419 | 0,124      |
| TcCLB.507611.340 | hypothetical protein, conserved                           | -0,342  | 0,003567   |

|                  |                                                               |         |            |
|------------------|---------------------------------------------------------------|---------|------------|
| TcCLB.510535.40  | hypothetical protein, conserved                               | -0,342  | 0,03149    |
| TcCLB.510187.430 | DNA mismatch repair protein MSH6, putative (MSH6)             | -0,3422 | 0,00002253 |
| TcCLB.504103.100 | ABC1 protein, putative                                        | -0,3423 | 0,006032   |
| TcCLB.510289.70  | hypothetical protein, conserved                               | -0,3424 | 0,03956    |
| TcCLB.511047.50  | proteasome regulatory ATPase subunit 2, putative              | -0,3425 | 0,0006646  |
| TcCLB.511421.224 | hypothetical protein, conserved (pseudogene)                  | -0,3425 | 0,001929   |
| TcCLB.504215.10  | hypothetical protein, conserved                               | -0,3425 | 0,006017   |
| TcCLB.506941.60  | phospholipid-translocating P-type ATPase (flippase), putative | -0,3425 | 0,007053   |
| TcCLB.508409.90  | hypothetical protein, conserved                               | -0,3428 | 0,00001361 |
| TcCLB.507031.20  | hypothetical protein, conserved                               | -0,3429 | 0,002269   |
| TcCLB.509053.40  | hypothetical protein, conserved                               | -0,3429 | 0,005228   |
| TcCLB.503903.30  | hypothetical protein                                          | -0,343  | 0,0103     |
| TcCLB.507883.100 | malate dehydrogenase, putative                                | -0,3432 | 0,01032    |
| TcCLB.508445.60  | hypothetical protein, conserved                               | -0,3433 | 0,01437    |
| TcCLB.410049.10  | hypothetical protein, conserved                               | -0,3434 | 0,5558     |
| TcCLB.508989.80  | hypothetical protein                                          | -0,3435 | 0,0005113  |
| TcCLB.511365.10  | hypothetical protein, conserved                               | -0,3436 | 0,0109     |
| TcCLB.508295.70  | hypothetical protein                                          | -0,3436 | 0,5028     |
| TcCLB.504153.190 | mitochondrial edited mRNA stability factor 1 subunit          | -0,3438 | 0,0005067  |
| TcCLB.506743.150 | proteasome 26S non-ATPase subunit 9, putative                 | -0,3438 | 0,04675    |
| TcCLB.506537.260 | protein kinase, putative                                      | -0,3438 | 0,3648     |
| TcCLB.506067.80  | mucin TcMUCII, putative                                       | -0,3439 | 0,5567     |
| TcCLB.506137.40  | mucin TcMUCII, putative                                       | -0,3439 | 0,7056     |
| TcCLB.504193.51  | ATP-dependent DEAD/H RNA helicase (pseudogene), putative      | -0,344  | 0,0403     |
| TcCLB.503693.20  | hypothetical protein, conserved                               | -0,344  | 0,04248    |
| TcCLB.507159.37  | hypothetical protein, conserved                               | -0,3441 | 0,01499    |
| TcCLB.506925.490 | hypothetical protein, conserved                               | -0,3443 | 0,01164    |
| TcCLB.507993.120 | synaptotagmin, putative                                       | -0,3443 | 0,05884    |
| TcCLB.503541.20  | hypothetical protein, conserved                               | -0,3444 | 0,03276    |
| TcCLB.503531.49  | structural maintenance of chromosome 3, putative              | -0,3444 | 0,1299     |
| TcCLB.511215.30  | hypothetical protein                                          | -0,3445 | 0,003386   |
| TcCLB.506725.50  | hypothetical protein, conserved                               | -0,3445 | 0,01116    |
| TcCLB.505555.40  | hypothetical protein, conserved                               | -0,3446 | 0,002033   |
| TcCLB.506629.60  | vesicular-fusion ATPase-like protein, putative                | -0,3446 | 0,004291   |
| TcCLB.508141.40  | ATP-dependent RNA helicase, putative                          | -0,3447 | 3,377E-06  |
| TcCLB.511881.10  | GCN5-like protein, putative                                   | -0,3448 | 0,1854     |
| TcCLB.509065.20  | mitogen-activated protein kinase 5, putative                  | -0,3449 | 0,04711    |
| TcCLB.509395.30  | tRNA exportin, putative                                       | -0,345  | 0,0001716  |
| TcCLB.504089.40  | long-chain-fatty-acid-CoA ligase, putative                    | -0,345  | 0,0008972  |
| TcCLB.511479.30  | hypothetical protein, conserved                               | -0,345  | 0,02138    |
| TcCLB.509099.40  | hypothetical protein, conserved                               | -0,345  | 0,05322    |
| TcCLB.508613.100 | surface protease GP63 (pseudogene), putative                  | -0,345  | 0,2407     |
| TcCLB.508153.994 | cytochrome c oxidase copper chaperone, putative               | -0,3452 | 0,1118     |
| TcCLB.509767.20  | hypothetical protein, conserved                               | -0,3452 | 0,1238     |
| TcCLB.511537.40  | protein phosphatase 2A catalytic subunit, putative            | -0,3453 | 0,00442    |

|                   |                                                            |         |            |
|-------------------|------------------------------------------------------------|---------|------------|
| TcCLB.510533.90   | hypothetical protein, conserved                            | -0,3454 | 0,01374    |
| TcCLB.511423.149  | conserved protein, unknown function                        | -0,3454 | 0,04064    |
| TcCLB.509617.40   | hypothetical protein, conserved                            | -0,3455 | 0,001438   |
| TcCLB.511303.100  | hypothetical protein                                       | -0,3455 | 0,02235    |
| TcCLB.511165.10   | ATP-dependent DEAD/H RNA helicase, putative                | -0,3455 | 0,02741    |
| TcCLB.505025.80   | hypothetical protein, conserved                            | -0,3455 | 0,04103    |
| TcCLB.508637.130  | hypothetical protein, conserved                            | -0,3456 | 0,2908     |
| TcCLB.510013.120  | surface protease GP63, putative                            | -0,3458 | 0,6779     |
| TcCLB.511275.10   | hypothetical protein, conserved (pseudogene)               | -0,3459 | 0,00002546 |
| TcCLB.508965.100  | hypothetical protein, conserved                            | -0,3459 | 0,0002848  |
| TcCLB.461165.10   | hypothetical protein, conserved                            | -0,3461 | 0,03907    |
| TcCLB.507739.120  | amastin, putative                                          | -0,3461 | 0,3572     |
| TcCLB.509297.20   | hypothetical protein, conserved                            | -0,3463 | 0,004466   |
| TcCLB.426799.19   | serine/threonine protein kinase, putative                  | -0,3463 | 0,09488    |
| TcCLB.506627.110  | hypothetical protein, conserved                            | -0,3465 | 0,0005777  |
| TcCLB.506247.450  | hypothetical protein, conserved                            | -0,3465 | 0,002802   |
| TcCLB.503959.50   | hypothetical protein, conserved                            | -0,3465 | 0,01757    |
| TcCLB.508959.20   | hypothetical protein, conserved                            | -0,3465 | 0,01821    |
| TcCLB.506613.20   | mucin-associated surface protein (MASP, pseudogene), pu    | -0,3465 | 0,3431     |
| TcCLB.506431.5    | trans-sialidase, putative (pseudogene)                     | -0,3466 | 0,5276     |
| TcCLB.508435.60   | mucin TcMUCII, putative                                    | -0,3466 | 0,5661     |
| TcCLB.508989.30   | RNA-binding protein, putative                              | -0,3467 | 0,002827   |
| TcCLB.508269.30   | translation initiation factor 2 subunit, putative          | -0,3467 | 0,01849    |
| TcCLB.506227.80   | mitochondrial DNA polymerase I protein B, putative (POLIE  | -0,3468 | 0,0002409  |
| TcCLB.504741.10   | hypothetical protein, conserved                            | -0,3469 | 0,04424    |
| TcCLB.505073.14   | hypothetical protein, conserved                            | -0,3471 | 0,06833    |
| TcCLB.504173.50   | dihydrouridine synthase (Dus), putative                    | -0,3473 | 0,04122    |
| TcCLB.505009.49   | hypothetical protein, conserved                            | -0,3474 | 0,01283    |
| TcCLB.504073.30   | ribonucleoside-diphosphate reductase large chain, putative | -0,3475 | 0,1056     |
| TcCLB.511283.120  | hypothetical protein, conserved                            | -0,3475 | 0,5623     |
| TcCLB.508879.170  | mitochondrial RNA binding complex 1 subunit, putative      | -0,3476 | 0,001306   |
| TcCLB.503651.4    | hypothetical protein, conserved (fragment)                 | -0,3476 | 0,008101   |
| TcCLB.507993.210  | hypothetical protein, conserved                            | -0,3477 | 0,002827   |
| TcCLB.511431.50   | hypothetical protein, conserved                            | -0,3477 | 0,005528   |
| TcCLB.510725.80   | hypothetical protein                                       | -0,3477 | 0,02209    |
| TcCLB.508309.10   | mucin-associated surface protein (MASP), putative          | -0,3477 | 0,483      |
| TcCLB.504081.80   | trans-sialidase, Group V, putative                         | -0,3478 | 0,3992     |
| TcCLB.508465.70   | hypothetical protein, conserved                            | -0,3479 | 0,009058   |
| TcCLB.506501.380  | mucin-associated surface protein (MASP), putative          | -0,3479 | 0,3847     |
| TcCLB.508951.80   | hypothetical protein, conserved                            | -0,348  | 0,003087   |
| TcCLB.510603.100  | hypothetical protein, conserved                            | -0,348  | 0,07468    |
| TcCLB.503657.9    | hypothetical protein, conserved                            | -0,3481 | 0,006261   |
| TcCLB.508153.1030 | hypothetical protein, conserved                            | -0,3482 | 0,00013    |
| TcCLB.508911.30   | hypothetical protein, conserved (pseudogene)               | -0,3482 | 0,007638   |
| TcCLB.506753.110  | cytochrome b5-like protein, putative                       | -0,3482 | 0,01414    |

|                  |                                                           |         |            |
|------------------|-----------------------------------------------------------|---------|------------|
| TcCLB.509671.180 | hypothetical protein, conserved                           | -0,3482 | 0,02475    |
| TcCLB.509563.50  | hypothetical protein, conserved                           | -0,3483 | 0,006026   |
| TcCLB.511003.10  | phospholipid-translocating ATPase, putative               | -0,3484 | 0,002992   |
| TcCLB.511621.70  | ribosomal protein L11, putative                           | -0,3484 | 0,01342    |
| TcCLB.507641.80  | 5'-3' exoribonuclease D, putative (XRND)                  | -0,3485 | 0,00005633 |
| TcCLB.510089.64  | hypothetical protein, conserved                           | -0,3485 | 0,02281    |
| TcCLB.510175.140 | hypothetical protein, conserved (pseudogene)              | -0,3485 | 0,05578    |
| TcCLB.510359.550 | mucin-associated surface protein (MASP), putative         | -0,3485 | 0,4916     |
| TcCLB.506977.90  | proteasome regulatory non-ATP-ase subunit 5, putative (R) | -0,3487 | 7,631E-07  |
| TcCLB.511211.150 | spindle pole body component alp6, putative                | -0,3487 | 0,003172   |
| TcCLB.508741.310 | hypothetical protein                                      | -0,3487 | 0,005754   |
| TcCLB.509033.50  | hypothetical protein, conserved                           | -0,3489 | 0,0004743  |
| TcCLB.507485.70  | hypothetical protein, conserved                           | -0,3489 | 0,03988    |
| TcCLB.507031.80  | hypothetical protein, conserved                           | -0,349  | 0,00004186 |
| TcCLB.511417.50  | hypothetical protein                                      | -0,349  | 0,07338    |
| TcCLB.506871.110 | hypothetical protein, conserved                           | -0,3491 | 0,003785   |
| TcCLB.511307.6   | hypothetical protein, conserved                           | -0,3491 | 0,0407     |
| TcCLB.507963.90  | hypothetical protein, conserved                           | -0,3491 | 0,04824    |
| TcCLB.507485.90  | Wee1-like protein kinase, putative                        | -0,3492 | 0,001315   |
| TcCLB.503893.60  | hypothetical protein, conserved                           | -0,3492 | 0,008362   |
| TcCLB.507709.100 | protein phosphatase 2A regulatory subunit, putative       | -0,3494 | 0,01258    |
| TcCLB.509877.30  | guanine nucleotide-binding beta subunit-like protein      | -0,3495 | 0,0006969  |
| TcCLB.510953.49  | lipase-like protein, putative                             | -0,3495 | 0,06209    |
| TcCLB.508461.500 | 60S ribosomal protein L27A/L29, putative                  | -0,3496 | 0,03801    |
| TcCLB.506589.89  | mucin-associated surface protein (MASP, pseudogene), pu   | -0,3496 | 0,3421     |
| TcCLB.510901.120 | protein kinase, putative                                  | -0,35   | 0,0002162  |
| TcCLB.506941.70  | hypothetical protein, conserved                           | -0,35   | 0,0005296  |
| TcCLB.503925.30  | protein kinase, putative                                  | -0,35   | 0,01589    |
| TcCLB.503599.40  | hypothetical protein, conserved                           | -0,3501 | 0,003929   |
| TcCLB.505939.89  | 5'-3' exoribonuclease A, putative (fragment) (XRNA)       | -0,3501 | 0,006875   |
| TcCLB.510175.160 | protein kinase, putative                                  | -0,3501 | 0,1164     |
| TcCLB.511249.60  | protein kinase, putative                                  | -0,3506 | 0,000435   |
| TcCLB.509641.40  | hypothetical protein, conserved                           | -0,3507 | 0,00006512 |
| TcCLB.510575.200 | chaperone DNAJ protein, putative                          | -0,3507 | 0,0001788  |
| TcCLB.511127.380 | hypothetical protein, conserved                           | -0,3508 | 0,00001371 |
| TcCLB.506635.20  | ATP-dependent RNA helicase, putative                      | -0,3508 | 0,0005301  |
| TcCLB.510457.10  | mucin-associated surface protein (MASP), putative         | -0,351  | 0,5996     |
| TcCLB.510647.69  | hypothetical protein, conserved                           | -0,3511 | 0,2731     |
| TcCLB.509647.140 | hypothetical protein, conserved                           | -0,3512 | 0,002036   |
| TcCLB.506587.20  | hypothetical protein                                      | -0,3513 | 0,006345   |
| TcCLB.506513.40  | hypothetical protein, conserved                           | -0,3513 | 0,0312     |
| TcCLB.509959.60  | trans-sialidase (pseudogene), putative                    | -0,3513 | 0,534      |
| TcCLB.506519.120 | hypothetical protein, conserved                           | -0,3514 | 0,008754   |
| TcCLB.511301.130 | protein kinase, putative                                  | -0,3514 | 0,03119    |
| TcCLB.504117.50  | hypothetical protein, conserved (pseudogene)              | -0,3514 | 0,3522     |

|                  |                                                           |         |           |
|------------------|-----------------------------------------------------------|---------|-----------|
| TcCLB.506505.40  | protein kinase, putative                                  | -0,3515 | 0,0002277 |
| TcCLB.509455.70  | DNA polymerase delta subunit 2, putative                  | -0,3515 | 0,001655  |
| TcCLB.508723.40  | hypothetical protein, conserved                           | -0,3516 | 0,0005385 |
| TcCLB.508479.174 | hypothetical protein, conserved                           | -0,3517 | 0,009129  |
| TcCLB.506315.70  | hypothetical protein, conserved                           | -0,3518 | 0,02417   |
| TcCLB.511371.5   | trans-sialidase (pseudogene), putative                    | -0,3518 | 0,1497    |
| TcCLB.471901.5   | GDP-mannose 4,6 dehydratase, putative (fragment)          | -0,3518 | 0,5278    |
| TcCLB.507483.30  | calmodulin, putative                                      | -0,3519 | 0,003513  |
| TcCLB.509267.80  | hypothetical protein                                      | -0,352  | 0,03875   |
| TcCLB.506755.140 | ATP-dependent helicase, putative                          | -0,3521 | 0,0007434 |
| TcCLB.510535.70  | hypothetical protein, conserved                           | -0,3521 | 0,007863  |
| TcCLB.509821.20  | trans-sialidase (pseudogene), putative                    | -0,3522 | 0,03608   |
| TcCLB.511925.10  | hypothetical protein, conserved                           | -0,3523 | 0,0033    |
| TcCLB.509647.160 | SKP1-like protein                                         | -0,3525 | 0,01528   |
| TcCLB.507471.41  | trans-sialidase (pseudogene), putative                    | -0,3525 | 0,09898   |
| TcCLB.511245.79  | hypothetical protein, conserved                           | -0,3526 | 0,01738   |
| TcCLB.510203.49  | hypothetical protein, conserved (pseudogene)              | -0,3527 | 0,06814   |
| TcCLB.508891.120 | periodic tryptophan protein 2 (pseudogene), putative      | -0,3528 | 0,001001  |
| TcCLB.509595.40  | hypothetical protein, conserved                           | -0,3528 | 0,002791  |
| TcCLB.510237.129 | dispersed gene family protein 1 (DGF-1), putative (fragme | -0,3528 | 0,1567    |
| TcCLB.511233.100 | NUDIX hydrolase 3, putative (Nudix3)                      | -0,3529 | 0,0404    |
| TcCLB.506475.80  | WD40 repeat-containing protein                            | -0,353  | 0,0001595 |
| TcCLB.503845.60  | trans-sialidase (pseudogene), putative                    | -0,353  | 0,01013   |
| TcCLB.508987.9   | hypothetical protein, conserved                           | -0,3532 | 0,0001534 |
| TcCLB.510759.180 | hypothetical protein, conserved                           | -0,3532 | 0,000952  |
| TcCLB.511277.10  | DNA-directed RNA polymerase I subunit RPB5z, putative (F  | -0,3533 | 0,02336   |
| TcCLB.507715.30  | transcription elongation factor-like protein, putative    | -0,3534 | 0,002333  |
| TcCLB.506681.50  | hypothetical protein, conserved                           | -0,3536 | 0,0009524 |
| TcCLB.510303.40  | hypothetical protein                                      | -0,3536 | 0,007444  |
| TcCLB.506989.60  | phosphate transporter, putative                           | -0,3536 | 0,01192   |
| TcCLB.508509.70  | mucin TcMUCII, putative                                   | -0,3536 | 0,6008    |
| TcCLB.507031.130 | hypothetical protein, conserved                           | -0,3538 | 0,00168   |
| TcCLB.506425.20  | hypothetical protein                                      | -0,3538 | 0,0284    |
| TcCLB.510661.150 | hypothetical protein, conserved                           | -0,3539 | 0,02115   |
| TcCLB.503909.110 | intraflagellar transport (IFT) protein, putative (IFT20)  | -0,3539 | 0,03639   |
| TcCLB.508703.20  | trans-sialidase (pseudogene), putative                    | -0,354  | 0,3772    |
| TcCLB.511033.10  | hypothetical protein, conserved                           | -0,3541 | 0,0102    |
| TcCLB.506735.60  | hypothetical protein, conserved                           | -0,3542 | 0,09375   |
| TcCLB.506175.70  | hypothetical protein, conserved                           | -0,3543 | 0,004823  |
| TcCLB.508857.100 | hypothetical protein, conserved                           | -0,3544 | 0,001834  |
| TcCLB.511751.70  | hypothetical protein, conserved                           | -0,3545 | 7,114E-06 |
| TcCLB.507089.180 | hypothetical protein, conserved                           | -0,3545 | 0,001197  |
| TcCLB.506605.100 | hypothetical protein                                      | -0,3546 | 0,006286  |
| TcCLB.506855.370 | hypothetical protein, conserved                           | -0,3546 | 0,007546  |
| TcCLB.511419.70  | hypothetical protein                                      | -0,3546 | 0,03832   |

|                  |                                                                             |         |            |
|------------------|-----------------------------------------------------------------------------|---------|------------|
| TcCLB.508427.20  | mucin-associated surface protein (MASP), putative                           | -0,3546 | 0,2934     |
| TcCLB.504081.390 | trans-sialidase (pseudogene), putative                                      | -0,3547 | 0,2183     |
| TcCLB.511211.20  | Coatomer subunit gamma (COPG)                                               | -0,3552 | 0,00006661 |
| TcCLB.507809.70  | small ubiquitin protein, putative                                           | -0,3554 | 0,0442     |
| TcCLB.507077.30  | hypothetical protein, conserved                                             | -0,3555 | 0,1116     |
| TcCLB.444777.29  | intraflagellar transport protein 88, putative (fragment) (IF <sup>1</sup> ) | -0,3556 | 0,01086    |
| TcCLB.503513.20  | hypothetical protein                                                        | -0,3556 | 0,01158    |
| TcCLB.509785.90  | trans-sialidase (pseudogene), putative                                      | -0,3557 | 0,2252     |
| TcCLB.509011.50  | hypothetical protein, conserved                                             | -0,3558 | 0,00005118 |
| TcCLB.510073.90  | hypothetical protein, conserved                                             | -0,3558 | 0,008705   |
| TcCLB.506405.40  | hypothetical protein, conserved                                             | -0,3558 | 0,01965    |
| TcCLB.509395.90  | hypothetical protein, conserved                                             | -0,3558 | 0,04802    |
| TcCLB.510429.10  | hypothetical protein, conserved                                             | -0,3558 | 0,07777    |
| TcCLB.508707.180 | ubiquitin hydrolase, putative                                               | -0,3562 | 0,0001463  |
| TcCLB.511285.120 | ATP-dependent RNA helicase, putative                                        | -0,3563 | 0,009261   |
| TcCLB.506265.40  | hypothetical protein, conserved                                             | -0,3563 | 0,1326     |
| TcCLB.507389.10  | hypothetical protein, conserved                                             | -0,3564 | 0,02472    |
| TcCLB.509019.30  | dispersed gene family protein 1 (DGF-1), putative                           | -0,3564 | 0,2397     |
| TcCLB.509733.10  | hypothetical protein, conserved                                             | -0,3567 | 0,0095     |
| TcCLB.507603.230 | hydroxyacylglutathione hydrolase, putative                                  | -0,3568 | 0,0503     |
| TcCLB.511237.90  | hypothetical protein, conserved                                             | -0,3568 | 0,2043     |
| TcCLB.511277.330 | uracil-DNA glycosylase                                                      | -0,3569 | 0,00137    |
| TcCLB.506435.130 | hypothetical protein, conserved                                             | -0,3569 | 0,00825    |
| TcCLB.506947.100 | hypothetical protein, conserved                                             | -0,3569 | 0,0116     |
| TcCLB.508533.20  | hypothetical protein, conserved                                             | -0,3569 | 0,0129     |
| TcCLB.508175.180 | hypothetical protein, conserved                                             | -0,3571 | 0,0009164  |
| TcCLB.509007.60  | rac serine-threonine kinase, putative                                       | -0,3571 | 0,003612   |
| TcCLB.509157.270 | hypothetical protein, conserved                                             | -0,3572 | 0,0201     |
| TcCLB.503841.50  | hypothetical protein, conserved                                             | -0,3574 | 0,035      |
| TcCLB.506947.60  | hypothetical protein, conserved                                             | -0,3575 | 0,02372    |
| TcCLB.507507.49  | hypothetical protein, conserved                                             | -0,3575 | 0,27       |
| TcCLB.504045.120 | hypothetical protein, conserved                                             | -0,3576 | 0,0044     |
| TcCLB.510001.31  | hypothetical protein, conserved                                             | -0,3576 | 0,03853    |
| TcCLB.510879.150 | hypothetical protein, conserved                                             | -0,3577 | 0,004268   |
| TcCLB.506289.9   | DNA ligase, putative (fragment)                                             | -0,3577 | 0,01676    |
| TcCLB.506853.30  | arginine N-methyltransferase, type II, putative (PRMT5)                     | -0,3578 | 0,003134   |
| TcCLB.508153.590 | hypothetical protein, conserved                                             | -0,3579 | 0,01456    |
| TcCLB.511189.70  | hypothetical protein, conserved                                             | -0,3579 | 0,4034     |
| TcCLB.503697.120 | hypothetical protein, conserved                                             | -0,358  | 0,0009932  |
| TcCLB.509649.30  | 19S proteasome non-atpase subunit 8 (Rpn8)                                  | -0,358  | 0,001178   |
| TcCLB.506177.40  | palmitoyl acyltransferase 6, putative                                       | -0,358  | 0,08318    |
| TcCLB.506247.440 | hypothetical protein, conserved                                             | -0,358  | 0,1143     |
| TcCLB.506699.9   | hypothetical protein, conserved                                             | -0,3582 | 0,05751    |
| TcCLB.506241.19  | dispersed gene family protein 1 (DGF-1), putative                           | -0,3582 | 0,06738    |
| TcCLB.448387.9   | hypothetical protein, conserved                                             | -0,3583 | 0,01919    |



|                  |                                                           |         |            |
|------------------|-----------------------------------------------------------|---------|------------|
| TcCLB.507395.20  | hypothetical protein, conserved                           | -0,3583 | 0,04125    |
| TcCLB.506355.35  | trans-sialidase (pseudogene), putative                    | -0,3584 | 0,03871    |
| TcCLB.504059.24  | hypothetical protein, conserved                           | -0,3585 | 0,07171    |
| TcCLB.511725.150 | exportin 1, putative (CRM1)                               | -0,3586 | 0,00003794 |
| TcCLB.511507.110 | hypothetical protein, conserved (YCF45)                   | -0,3586 | 0,006021   |
| TcCLB.510387.70  | hypothetical protein, conserved (pseudogene)              | -0,3586 | 0,1555     |
| TcCLB.510747.130 | hypothetical protein, conserved                           | -0,3588 | 0,0006133  |
| TcCLB.506513.20  | hypothetical protein, conserved                           | -0,3588 | 0,04737    |
| TcCLB.506751.20  | mucin-associated surface protein (MASP, pseudogene), pu   | -0,3589 | 0,4373     |
| TcCLB.506211.60  | RNA-binding protein, putative                             | -0,359  | 0,001544   |
| TcCLB.511173.80  | trans-sialidase, Group V, putative                        | -0,3591 | 0,3083     |
| TcCLB.504575.60  | surface protease GP63, putative (fragment)                | -0,3591 | 0,6818     |
| TcCLB.511903.160 | phosphatidylinositol 3-kinase vps34-like                  | -0,3592 | 0,0001011  |
| TcCLB.509455.140 | cyclin, putative                                          | -0,3592 | 0,01541    |
| TcCLB.508271.4   | hypothetical protein, conserved                           | -0,3592 | 0,07196    |
| TcCLB.510953.40  | hypothetical protein, conserved                           | -0,3593 | 0,01224    |
| TcCLB.507969.60  | C-14 sterol reductase, putative                           | -0,3594 | 0,004296   |
| TcCLB.508593.44  | serine peptidase, Clan SC, Family S9D                     | -0,3594 | 0,004563   |
| TcCLB.506583.40  | cdc2-related kinase 3, putative (CRK3)                    | -0,3594 | 0,02644    |
| TcCLB.511529.230 | hypothetical protein, conserved                           | -0,3595 | 0,0316     |
| TcCLB.507011.170 | hypothetical protein, conserved                           | -0,3596 | 0,003306   |
| TcCLB.507049.150 | hypothetical protein, conserved                           | -0,3596 | 0,01667    |
| TcCLB.507773.40  | hypothetical protein, conserved                           | -0,3597 | 0,004275   |
| TcCLB.503513.10  | casein kinase II, alpha chain, putative                   | -0,3597 | 0,007524   |
| TcCLB.510105.30  | clathrin coat assembly protein, putative                  | -0,3597 | 0,01465    |
| TcCLB.506959.80  | hypothetical protein, conserved                           | -0,3597 | 0,01996    |
| TcCLB.507547.30  | Mitochondrial-processing peptidase subunit alpha (MPPA)   | -0,3598 | 0,000171   |
| TcCLB.506855.90  | structural maintenance of chromosome protein 4, putative  | -0,36   | 0,00001433 |
| TcCLB.510769.120 | calcium motive p-type ATPase, putative                    | -0,36   | 0,00007686 |
| TcCLB.505057.10  | hypothetical protein, conserved                           | -0,36   | 0,004441   |
| TcCLB.509215.20  | hypothetical protein, conserved                           | -0,36   | 0,07147    |
| TcCLB.511063.80  | dispersed gene family protein 1 (DGF-1, pseudogene), puta | -0,3601 | 0,277      |
| TcCLB.503893.160 | hypothetical protein, conserved                           | -0,3602 | 0,004924   |
| TcCLB.510445.61  | hypothetical protein, conserved (fragment)                | -0,3603 | 0,07413    |
| TcCLB.509069.40  | hypothetical protein                                      | -0,3604 | 0,002459   |
| TcCLB.507763.10  | hypothetical protein, conserved                           | -0,3604 | 0,01492    |
| TcCLB.511733.60  | hypothetical protein, conserved                           | -0,3605 | 0,01997    |
| TcCLB.510265.30  | hypothetical protein, conserved                           | -0,3606 | 0,00000134 |
| TcCLB.508461.230 | kinetoplastid kinetochore protein 3, putative (kkt3)      | -0,3606 | 0,002235   |
| TcCLB.511003.120 | hypothetical protein, conserved                           | -0,3606 | 0,04124    |
| TcCLB.509591.30  | ras-family member, GTP-binding protein, putative          | -0,3607 | 0,001436   |
| TcCLB.506389.10  | trans-sialidase, putative                                 | -0,3607 | 0,05998    |
| TcCLB.508883.20  | hypothetical protein                                      | -0,3607 | 0,5256     |
| TcCLB.508231.150 | hypothetical protein                                      | -0,3608 | 0,0007352  |
| TcCLB.508153.550 | hypothetical protein, conserved                           | -0,3609 | 0,000878   |

|                  |                                                               |         |            |
|------------------|---------------------------------------------------------------|---------|------------|
| TcCLB.511653.50  | hypothetical protein, conserved                               | -0,3609 | 0,009689   |
| TcCLB.508605.31  | trans-sialidase (pseudogene), putative                        | -0,3609 | 0,02097    |
| TcCLB.511771.70  | dispersed gene family protein 1 (DGF-1), putative             | -0,3609 | 0,03815    |
| TcCLB.510749.90  | hypothetical protein, conserved                               | -0,3609 | 0,07461    |
| TcCLB.506797.100 | beta-ketoacyl-ACP reductase 2, putative                       | -0,361  | 0,004704   |
| TcCLB.506181.90  | F-actin capping protein, putative                             | -0,361  | 0,006765   |
| TcCLB.511867.120 | hypothetical protein, conserved                               | -0,3611 | 0,0105     |
| TcCLB.506639.50  | dispersed gene family protein 1 (DGF-1, pseudogene), putative | -0,3611 | 0,09791    |
| TcCLB.506605.214 | hypothetical protein, conserved                               | -0,3612 | 0,09336    |
| TcCLB.508277.20  | protein kinase, putative                                      | -0,3613 | 0,001081   |
| TcCLB.509965.150 | hypothetical protein, conserved                               | -0,3614 | 0,0159     |
| TcCLB.507031.64  | hypothetical protein, conserved                               | -0,3615 | 0,02697    |
| TcCLB.511801.40  | hypothetical protein, conserved                               | -0,3615 | 0,02847    |
| TcCLB.418221.4   | hypothetical protein, conserved (fragment)                    | -0,3616 | 0,02128    |
| TcCLB.508207.31  | hypothetical protein                                          | -0,3617 | 0,04692    |
| TcCLB.510307.94  | ATP-dependent DEAD/H RNA helicase (pseudogene), putative      | -0,3617 | 0,139      |
| TcCLB.507883.70  | PrimPol-like protein 2, putative (ppl2)                       | -0,3619 | 0,001008   |
| TcCLB.508461.300 | hypothetical protein, conserved                               | -0,3619 | 0,001446   |
| TcCLB.509805.180 | ttaggg binding factor, putative                               | -0,3619 | 0,004668   |
| TcCLB.508641.320 | formin-like protein                                           | -0,362  | 0,0005911  |
| TcCLB.511603.369 | surface protease GP63 (pseudogene), putative                  | -0,362  | 0,5412     |
| TcCLB.508803.5   | retrotransposon hot spot protein (RHS, pseudogene), putative  | -0,362  | 0,558      |
| TcCLB.510741.40  | hypothetical protein, conserved                               | -0,3621 | 0,0001342  |
| TcCLB.508859.100 | hypothetical protein, conserved                               | -0,3622 | 0,03974    |
| TcCLB.506131.120 | trans-sialidase (pseudogene), putative                        | -0,3622 | 0,2614     |
| TcCLB.508221.990 | surface protease GP63 (pseudogene), putative                  | -0,3622 | 0,3883     |
| TcCLB.507053.10  | 50S ribosomal protein L7Ae, putative                          | -0,3623 | 0,0004174  |
| TcCLB.511367.310 | hypothetical protein, conserved                               | -0,3623 | 0,01284    |
| TcCLB.509985.78  | hypothetical protein, conserved                               | -0,3623 | 0,04424    |
| TcCLB.506953.20  | hypothetical protein, conserved                               | -0,3623 | 0,1334     |
| TcCLB.506297.50  | kinesin, putative                                             | -0,3624 | 4,931E-06  |
| TcCLB.503577.20  | U2 splicing auxiliary factor, putative (u2af26)               | -0,3624 | 0,00002577 |
| TcCLB.506559.530 | protein phosphatase 2C, putative                              | -0,3626 | 0,00724    |
| TcCLB.506579.110 | hypothetical protein, conserved                               | -0,3627 | 0,00000128 |
| TcCLB.511183.330 | dispersed gene family protein 1 (DGF-1), putative             | -0,3628 | 0,2481     |
| TcCLB.503809.140 | cation transporter, putative                                  | -0,3629 | 0,002077   |
| TcCLB.507243.9   | dispersed gene family protein 1 (DGF-1), putative             | -0,363  | 0,08823    |
| TcCLB.510933.110 | mucin-associated surface protein (MASP, pseudogene), putative | -0,363  | 0,4048     |
| TcCLB.507941.20  | hypothetical protein, conserved                               | -0,3631 | 0,00004742 |
| TcCLB.503627.9   | hypothetical protein, conserved (fragment)                    | -0,3631 | 0,00386    |
| TcCLB.504103.70  | hypothetical protein, conserved                               | -0,3631 | 0,02214    |
| TcCLB.506701.10  | dihydrolipoamide dehydrogenase, putative (GCVL-1)             | -0,3631 | 0,05997    |
| TcCLB.506529.40  | hypothetical protein, conserved                               | -0,3632 | 0,04909    |
| TcCLB.506335.100 | mucin-associated surface protein (MASP), putative             | -0,3633 | 0,1034     |
| TcCLB.505939.65  | hypothetical protein, conserved                               | -0,3633 | 0,1995     |

|                  |                                                            |         |            |
|------------------|------------------------------------------------------------|---------|------------|
| TcCLB.511545.70  | kinteoplast poly(A) polymerase complex 1 subunit, putative | -0,3634 | 0,00006927 |
| TcCLB.511847.10  | calpain-like cysteine peptidase, putative                  | -0,3634 | 0,002328   |
| TcCLB.510879.90  | hypothetical protein, conserved                            | -0,3634 | 0,04147    |
| TcCLB.508999.20  | Protein transport protein yif1, putative                   | -0,3636 | 0,03066    |
| TcCLB.511523.50  | hypothetical protein, conserved                            | -0,3637 | 0,01462    |
| TcCLB.469785.30  | hypothetical protein                                       | -0,3637 | 0,01729    |
| TcCLB.508323.120 | hypothetical protein, conserved                            | -0,3638 | 0,03536    |
| TcCLB.511727.60  | hypothetical protein, conserved                            | -0,3639 | 0,00005239 |
| TcCLB.503841.30  | rRNA dimethyltransferase, putative                         | -0,3639 | 0,04943    |
| TcCLB.508413.60  | hypothetical protein, conserved                            | -0,364  | 0,01561    |
| TcCLB.508739.30  | hypothetical protein                                       | -0,364  | 0,03416    |
| TcCLB.503887.10  | hypothetical protein, conserved                            | -0,364  | 0,04474    |
| TcCLB.511131.50  | U4/U6 small nuclear ribonuclear protein, putative          | -0,3641 | 0,002613   |
| TcCLB.508641.310 | hypothetical protein, conserved                            | -0,3642 | 0,0006594  |
| TcCLB.506367.50  | hypothetical protein, conserved                            | -0,3642 | 0,05456    |
| TcCLB.506925.510 | ribosome production factor 1, putative                     | -0,3643 | 0,0004059  |
| TcCLB.508325.30  | dispersed gene family protein 1 (DGF-1), putative          | -0,3643 | 0,01567    |
| TcCLB.510659.250 | phospholipase A1, putative                                 | -0,3644 | 0,002244   |
| TcCLB.510297.40  | hypothetical protein                                       | -0,3644 | 0,07548    |
| TcCLB.511509.5   | hypothetical protein, conserved                            | -0,3645 | 0,004185   |
| TcCLB.503851.24  | protein tyrosine phosphatase PRL                           | -0,3646 | 0,1039     |
| TcCLB.506569.45  | protein kinase (pseudogene), putative                      | -0,3646 | 0,1727     |
| TcCLB.507093.200 | hypothetical protein, conserved                            | -0,3647 | 0,0001092  |
| TcCLB.509261.20  | aminopeptidase, putative                                   | -0,3647 | 0,0003303  |
| TcCLB.509287.60  | hypothetical protein, conserved                            | -0,3647 | 0,0004114  |
| TcCLB.511287.170 | hypothetical protein, conserved                            | -0,3647 | 0,004182   |
| TcCLB.509991.70  | hypothetical protein, conserved (pseudogene)               | -0,3647 | 0,007701   |
| TcCLB.511295.50  | hypothetical protein, conserved                            | -0,3648 | 1,783E-06  |
| TcCLB.510167.4   | hypothetical protein, conserved                            | -0,3649 | 0,1172     |
| TcCLB.508817.90  | hypothetical protein, conserved (pseudogene)               | -0,3651 | 0,008943   |
| TcCLB.508891.80  | hypothetical protein, conserved (pseudogene)               | -0,3651 | 0,01163    |
| TcCLB.511527.82  | hypothetical protein, conserved                            | -0,3651 | 0,1324     |
| TcCLB.510607.80  | dispersed gene family protein 1 (DGF-1), putative          | -0,3652 | 0,1392     |
| TcCLB.506885.4   | hypothetical protein, conserved (fragment)                 | -0,3654 | 0,006611   |
| TcCLB.508799.50  | hypothetical protein                                       | -0,3655 | 0,01341    |
| TcCLB.504105.240 | hypothetical protein, conserved                            | -0,3656 | 0,0001577  |
| TcCLB.507081.30  | translation elongation factor EF-2, putative               | -0,3656 | 0,0007304  |
| TcCLB.507795.100 | mitochondrial ribosomal protein L3, putative               | -0,3657 | 0,0003849  |
| TcCLB.506195.309 | hypothetical protein, conserved                            | -0,3659 | 0,006545   |
| TcCLB.506945.105 | zinc-binding protein (Yippee), putative                    | -0,3659 | 0,04259    |
| TcCLB.506621.60  | acyl-CoA binding protein, putative                         | -0,366  | 0,00004772 |
| TcCLB.503801.9   | RAD50 DNA repair protein, putative (fragment)              | -0,366  | 0,0003155  |
| TcCLB.511163.50  | hypothetical protein, conserved                            | -0,366  | 0,01188    |
| TcCLB.506885.250 | hypothetical protein                                       | -0,3662 | 0,001919   |
| TcCLB.509073.100 | hypothetical protein, conserved                            | -0,3662 | 0,08209    |

|                  |                                                           |         |            |
|------------------|-----------------------------------------------------------|---------|------------|
| TcCLB.506517.110 | hypothetical protein, conserved                           | -0,3662 | 0,1163     |
| TcCLB.504181.50  | T-complex protein 1, delta subunit, putative              | -0,3664 | 0,003201   |
| TcCLB.507039.30  | retrotransposon hot spot protein (RHS, pseudogene), putat | -0,3664 | 0,003653   |
| TcCLB.506733.110 | hypothetical protein, conserved                           | -0,3665 | 0,03025    |
| TcCLB.510889.210 | hypothetical protein, conserved                           | -0,3666 | 0,02533    |
| TcCLB.511125.9   | dispersed gene family protein 1 (DGF-1), putative         | -0,3666 | 0,1729     |
| TcCLB.507883.90  | adenylate kinase, putative                                | -0,3667 | 0,04097    |
| TcCLB.511501.40  | hypothetical protein, conserved                           | -0,3667 | 0,05114    |
| TcCLB.506677.39  | Elongation factor G1, mitochondrial, putative (EF-G1)     | -0,3669 | 0,00001828 |
| TcCLB.508977.65  | elongation factor 1-gamma (EF-1-gamma, pseudogene), p     | -0,367  | 0,2915     |
| TcCLB.511837.70  | mitogen activated protein kinase, putative                | -0,3671 | 0,0001242  |
| TcCLB.506195.140 | hypothetical protein, conserved                           | -0,3671 | 0,0009749  |
| TcCLB.511907.280 | hypothetical protein, conserved                           | -0,3671 | 0,002395   |
| TcCLB.506131.110 | mucin-associated surface protein (MASP), putative         | -0,3671 | 0,448      |
| TcCLB.510659.50  | RNA polymerase-associated protein LEO1, putative          | -0,3672 | 0,00002046 |
| TcCLB.511583.30  | hypothetical protein, conserved                           | -0,3672 | 0,01681    |
| TcCLB.506511.30  | hypothetical protein, conserved                           | -0,3673 | 0,000341   |
| TcCLB.510325.60  | hypothetical protein, conserved                           | -0,3673 | 0,003911   |
| TcCLB.504741.120 | hypothetical protein, conserved                           | -0,3673 | 0,01063    |
| TcCLB.511149.60  | mucin-associated surface protein (MASP), putative         | -0,3674 | 0,5558     |
| TcCLB.511261.60  | hypothetical protein, conserved                           | -0,3675 | 0,000192   |
| TcCLB.495369.10  | hypothetical protein, conserved (fragment)                | -0,3675 | 0,03868    |
| TcCLB.510741.210 | glycerol kinase, glycosomal (pseudogene), putative        | -0,3676 | 0,002855   |
| TcCLB.510105.190 | hypothetical protein, conserved                           | -0,3676 | 0,01516    |
| TcCLB.503601.10  | trans-sialidase, Group V, putative                        | -0,3676 | 0,2405     |
| TcCLB.509805.110 | hypothetical protein, conserved                           | -0,3677 | 0,0004455  |
| TcCLB.511625.10  | transcription initiation protein, putative                | -0,3677 | 0,0007296  |
| TcCLB.507711.160 | hypothetical protein, conserved                           | -0,3678 | 6,926E-06  |
| TcCLB.506739.180 | hypothetical protein, conserved                           | -0,3678 | 0,00007556 |
| TcCLB.504033.100 | hypothetical protein, conserved                           | -0,3679 | 0,001023   |
| TcCLB.506139.70  | mucin-associated surface protein (MASP), putative         | -0,3679 | 0,3762     |
| TcCLB.427303.10  | 5'-3' exoribonuclease A, putative (fragment) (XRNA)       | -0,368  | 0,000107   |
| TcCLB.508717.56  | hypothetical protein, conserved                           | -0,368  | 0,01002    |
| TcCLB.506459.140 | hypothetical protein                                      | -0,368  | 0,4292     |
| TcCLB.508183.29  | hypothetical protein, conserved (fragment)                | -0,3682 | 0,03302    |
| TcCLB.508995.20  | Tubulin/FtsZ family, putative                             | -0,3683 | 0,0006845  |
| TcCLB.510911.10  | profilin, putative                                        | -0,3683 | 0,005051   |
| TcCLB.508851.210 | replication factor C, subunit 4, putative                 | -0,3683 | 0,04603    |
| TcCLB.511493.5   | hypothetical protein, conserved                           | -0,3683 | 0,2344     |
| TcCLB.507011.210 | hypothetical protein, conserved                           | -0,3684 | 0,00293    |
| TcCLB.511153.150 | hypothetical protein                                      | -0,3684 | 0,03711    |
| TcCLB.506629.190 | hypothetical protein, conserved                           | -0,3687 | 0,001702   |
| TcCLB.509065.130 | hypothetical protein, conserved                           | -0,3687 | 0,009171   |
| TcCLB.508961.30  | trafficking protein particle complex subunit 3, putative  | -0,3687 | 0,1143     |
| TcCLB.511019.120 | hypothetical protein, conserved                           | -0,3688 | 0,0003967  |

|                   |                                                       |         |            |
|-------------------|-------------------------------------------------------|---------|------------|
| TcCLB.509059.70   | hypothetical protein, conserved                       | -0,3689 | 0,000618   |
| TcCLB.508153.454  | hypothetical protein, conserved                       | -0,369  | 0,004769   |
| TcCLB.507925.20   | hypothetical protein, conserved                       | -0,3693 | 0,0006174  |
| TcCLB.503811.50   | hypothetical protein, conserved                       | -0,3693 | 0,003227   |
| TcCLB.507839.9    | Myotubularin-related protein, putative (fragment)     | -0,3694 | 0,06713    |
| TcCLB.510835.20   | hypothetical protein, conserved                       | -0,3695 | 0,005634   |
| TcCLB.508131.10   | hypothetical protein, conserved (pseudogene)          | -0,3696 | 0,00006279 |
| TcCLB.508465.50   | hypothetical protein, conserved                       | -0,3696 | 0,006739   |
| TcCLB.505183.20   | malic enzyme                                          | -0,3697 | 0,00004812 |
| TcCLB.507993.160  | UDP-galactopyranose mutase (GLF)                      | -0,3698 | 0,002053   |
| TcCLB.506181.70   | hypothetical protein, conserved                       | -0,3698 | 0,002061   |
| TcCLB.508803.19   | dispersed gene family protein 1 (DGF-1), putative     | -0,3698 | 0,1507     |
| TcCLB.504081.344  | elongation factor 1-gamma (EF-1-gamma, pseudogene), p | -0,3698 | 0,5139     |
| TcCLB.506477.20   | vesicular-fusion protein nsf, putative                | -0,37   | 0,001619   |
| TcCLB.504039.25   | syntaxin binding protein (pseudogene), putative       | -0,37   | 0,4722     |
| TcCLB.506587.40   | ATP-dependent RNA helicase FAL1, putative             | -0,3701 | 0,0008456  |
| TcCLB.510755.19   | hypothetical protein, conserved                       | -0,3703 | 0,006801   |
| TcCLB.510091.90   | hypothetical protein, conserved                       | -0,3704 | 0,0001067  |
| TcCLB.508199.20   | hypothetical protein, conserved                       | -0,3704 | 0,008857   |
| TcCLB.507999.10   | dispersed gene family protein 1 (DGF-1), putative     | -0,3705 | 0,002067   |
| TcCLB.508959.10   | hypothetical protein, conserved                       | -0,3705 | 0,1097     |
| TcCLB.508089.40   | hypothetical protein, conserved                       | -0,3706 | 0,01938    |
| TcCLB.405453.9    | dispersed gene family protein 1 (DGF-1), putative     | -0,3706 | 0,1885     |
| TcCLB.506435.210  | hypothetical protein, conserved                       | -0,3707 | 0,005961   |
| TcCLB.503767.5    | potassium voltage-gated channel, putative             | -0,3707 | 0,2285     |
| TcCLB.511857.10   | hypothetical protein, conserved                       | -0,3708 | 0,01062    |
| TcCLB.507023.110  | small GTP-binding protein Rab28, putative             | -0,3708 | 0,01211    |
| TcCLB.507857.40   | ATP-dependent DEAD/H RNA helicase, putative           | -0,371  | 0,0001737  |
| TcCLB.419703.20   | ubiquitin carboxyl-terminal hydrolase, putative       | -0,371  | 0,01202    |
| TcCLB.511283.240  | hypothetical protein, conserved                       | -0,3712 | 5,664E-07  |
| TcCLB.508153.1010 | hypothetical protein, conserved                       | -0,3712 | 0,001481   |
| TcCLB.507517.20   | DNA polymerase sigma-like protein, putative           | -0,3712 | 0,02042    |
| TcCLB.504005.10   | endonuclease III, putative                            | -0,3713 | 0,02206    |
| TcCLB.511403.30   | mucin TcMUCII, putative                               | -0,3714 | 0,4935     |
| TcCLB.510729.119  | hypothetical protein, conserved                       | -0,3715 | 0,03587    |
| TcCLB.508351.20   | hypothetical protein, conserved                       | -0,3715 | 0,09815    |
| TcCLB.510761.4    | hypothetical protein, conserved                       | -0,3716 | 0,003015   |
| TcCLB.507531.10   | hypothetical protein, conserved (pseudogene)          | -0,3718 | 0,0000124  |
| TcCLB.504109.130  | hypothetical protein, conserved                       | -0,3718 | 0,00002772 |
| TcCLB.510359.200  | hypothetical protein, conserved                       | -0,3719 | 0,0003742  |
| TcCLB.503653.70   | hypothetical protein, conserved                       | -0,3719 | 0,02781    |
| TcCLB.508895.10   | C-terminal motor kinesin, putative                    | -0,3719 | 0,04679    |
| TcCLB.508799.70   | pumilio-repeat, RNA-binding protein, putative         | -0,372  | 0,0003761  |
| TcCLB.503419.40   | hypothetical protein, conserved                       | -0,3722 | 0,01376    |
| TcCLB.510187.290  | ATP-dependent DEAD/H RNA helicase, putative (HEL64)   | -0,3723 | 5,635E-06  |

|                  |                                                                |         |            |
|------------------|----------------------------------------------------------------|---------|------------|
| TcCLB.506943.20  | hypothetical protein, conserved                                | -0,3723 | 0,006956   |
| TcCLB.506623.30  | hypothetical protein                                           | -0,3723 | 0,3528     |
| TcCLB.506767.119 | surface protease GP63 (pseudogene), putative                   | -0,3724 | 0,6296     |
| TcCLB.509319.20  | hypothetical protein, conserved                                | -0,3725 | 0,09115    |
| TcCLB.506435.140 | hypothetical protein, conserved                                | -0,3726 | 0,004377   |
| TcCLB.511837.20  | hypothetical protein, conserved                                | -0,373  | 0,0171     |
| TcCLB.507723.130 | eukaryotic translation initiation factor 3 subunit 8, putative | -0,3732 | 2,465E-07  |
| TcCLB.511211.220 | heat shock protein 70, putative                                | -0,3732 | 0,0005625  |
| TcCLB.507129.19  | hypothetical protein, conserved                                | -0,3733 | 0,00468    |
| TcCLB.507049.41  | hypothetical protein, conserved                                | -0,3735 | 0,1035     |
| TcCLB.510745.20  | hypothetical protein, conserved                                | -0,3737 | 0,008878   |
| TcCLB.506265.100 | ATP-dependent RNA helicase, putative                           | -0,3738 | 0,00002542 |
| TcCLB.510175.150 | hypothetical protein, conserved                                | -0,3738 | 0,1413     |
| TcCLB.509229.90  | hypothetical protein, conserved                                | -0,3739 | 0,0001929  |
| TcCLB.508461.140 | poly(A)-binding protein, putative                              | -0,374  | 7,531E-08  |
| TcCLB.508515.120 | hypothetical protein, conserved                                | -0,374  | 0,002332   |
| TcCLB.506925.410 | ATPase, putative                                               | -0,374  | 0,004355   |
| TcCLB.506267.48  | hypothetical protein                                           | -0,374  | 0,1889     |
| TcCLB.508667.49  | small nuclear ribonucleoprotein SmD2, putative                 | -0,3743 | 0,008155   |
| TcCLB.503421.14  | ATP-dependent DEAD/H RNA helicase (pseudogene), putative       | -0,3743 | 0,2977     |
| TcCLB.510659.104 | poly(ADP-ribose) glycohydrolase, putative                      | -0,3744 | 0,009764   |
| TcCLB.507053.180 | hypothetical protein, conserved                                | -0,3746 | 2,091E-08  |
| TcCLB.508613.30  | peroxisomal membrane protein 4, putative                       | -0,3746 | 0,02623    |
| TcCLB.511735.20  | hypothetical protein, conserved                                | -0,3747 | 0,01777    |
| TcCLB.505071.60  | protein kinase, putative                                       | -0,375  | 0,0002434  |
| TcCLB.507179.14  | hypothetical protein                                           | -0,375  | 0,2286     |
| TcCLB.511509.21  | hypothetical protein, conserved                                | -0,3751 | 0,001164   |
| TcCLB.508909.240 | hypothetical protein, conserved                                | -0,3752 | 0,001714   |
| TcCLB.511091.9   | mucin-associated surface protein (MASP), putative              | -0,3752 | 0,5765     |
| TcCLB.506241.70  | calcium motive p-type ATPase, putative                         | -0,3754 | 0,00002401 |
| TcCLB.508879.30  | dynein heavy chain, putative                                   | -0,3755 | 9,379E-07  |
| TcCLB.511529.80  | kinetoplast-associated protein 3 (KAP3)                        | -0,3756 | 0,001752   |
| TcCLB.509693.80  | hypoxanthine-guanine phosphoribosyltransferase, putative       | -0,3756 | 0,002016   |
| TcCLB.506885.50  | hypothetical protein, conserved                                | -0,3756 | 0,002069   |
| TcCLB.508711.49  | hypothetical protein, conserved                                | -0,3757 | 0,0001194  |
| TcCLB.509789.10  | hypothetical protein, conserved                                | -0,3757 | 0,0007038  |
| TcCLB.506883.80  | tRNA (guanine-N(7)-)-methyltransferase, putative               | -0,3758 | 0,01519    |
| TcCLB.510731.104 | hypothetical protein, conserved                                | -0,3758 | 0,03461    |
| TcCLB.506735.70  | hypothetical protein, conserved                                | -0,3759 | 0,00005339 |
| TcCLB.506807.10  | tubulin delta chain (TUBD1)                                    | -0,376  | 0,02091    |
| TcCLB.509979.320 | trans-sialidase, Group V, putative                             | -0,376  | 0,04235    |
| TcCLB.510687.130 | hypothetical protein, conserved                                | -0,3761 | 0,02641    |
| TcCLB.508409.160 | thymine-7-hydroxylase, putative                                | -0,3762 | 0,03352    |
| TcCLB.506709.50  | hypothetical protein, conserved                                | -0,3765 | 0,1234     |
| TcCLB.510311.50  | hypothetical protein, conserved                                | -0,3767 | 9,029E-06  |

|                  |                                                           |         |            |
|------------------|-----------------------------------------------------------|---------|------------|
| TcCLB.511491.60  | kinesin, putative                                         | -0,3767 | 0,00004794 |
| TcCLB.508949.30  | hypothetical protein, conserved                           | -0,3767 | 0,0006877  |
| TcCLB.510719.260 | ATP-dependent protease subunit HsIV, putative (HsIV)      | -0,3767 | 0,002193   |
| TcCLB.504045.30  | hypothetical protein                                      | -0,3767 | 0,02364    |
| TcCLB.508873.410 | hypothetical protein, conserved                           | -0,3768 | 0,09529    |
| TcCLB.509895.20  | mitochondrial RNA binding protein, putative               | -0,3769 | 5,584E-06  |
| TcCLB.507765.140 | hypothetical protein, conserved                           | -0,377  | 0,00002689 |
| TcCLB.509167.130 | hypothetical protein, conserved                           | -0,3771 | 0,0001572  |
| TcCLB.511855.80  | hypothetical protein, conserved                           | -0,3771 | 0,001427   |
| TcCLB.511077.110 | mucin-associated surface protein (MASP), putative         | -0,3773 | 0,4711     |
| TcCLB.506925.270 | hypothetical protein, conserved                           | -0,3774 | 0,00005693 |
| TcCLB.509023.170 | hypothetical protein, conserved                           | -0,3774 | 0,004792   |
| TcCLB.507009.110 | hypothetical protein, conserved                           | -0,3775 | 0,02224    |
| TcCLB.509697.15  | mucin-associated surface protein (MASP, pseudogene), pu   | -0,3775 | 0,5147     |
| TcCLB.510767.60  | hypothetical protein, conserved                           | -0,3776 | 0,02449    |
| TcCLB.506971.20  | surface protease GP63, putative                           | -0,3776 | 0,1495     |
| TcCLB.511511.90  | ATP-dependent DEAD/H DNA helicase recQ family, putativ    | -0,3777 | 0,001296   |
| TcCLB.507941.80  | hypothetical protein, conserved                           | -0,3779 | 0,0253     |
| TcCLB.506269.79  | mucin-associated surface protein (MASP, pseudogene), pu   | -0,3779 | 0,2405     |
| TcCLB.507107.40  | 3,2-trans-enoyl-CoA isomerase, mitochondrial precursor, p | -0,378  | 1,247E-06  |
| TcCLB.504119.20  | hypothetical protein, conserved                           | -0,3783 | 0,0009904  |
| TcCLB.507583.70  | ribonuclease inhibitor, putative                          | -0,3783 | 0,00391    |
| TcCLB.506529.524 | hypothetical protein, conserved                           | -0,3783 | 0,08761    |
| TcCLB.507069.120 | trans-sialidase (pseudogene), putative                    | -0,3784 | 0,2127     |
| TcCLB.507647.20  | hypothetical protein, conserved (pseudogene)              | -0,3785 | 0,00004847 |
| TcCLB.510491.10  | hypothetical protein, conserved                           | -0,3785 | 0,08948    |
| TcCLB.506139.1   | mucin-associated surface protein (MASP), putative (fragm  | -0,3785 | 0,6296     |
| TcCLB.511277.300 | hypothetical protein                                      | -0,3786 | 0,00003848 |
| TcCLB.509045.20  | co-chaperone GrpE, putative                               | -0,3787 | 0,00009396 |
| TcCLB.506843.120 | trans-sialidase (pseudogene), putative                    | -0,3787 | 0,2152     |
| TcCLB.508873.130 | hypothetical protein                                      | -0,3787 | 0,5052     |
| TcCLB.511211.60  | protein phosphatase 4 catalytic subunit, putative         | -0,3788 | 0,0009988  |
| TcCLB.511249.50  | hypothetical protein, conserved                           | -0,3788 | 0,001035   |
| TcCLB.508153.410 | hypothetical protein, conserved                           | -0,3789 | 0,002709   |
| TcCLB.503723.80  | hypothetical protein, conserved                           | -0,3789 | 0,0072     |
| TcCLB.510181.30  | ATP-dependent DEAD/H RNA helicase, putative               | -0,379  | 0,004739   |
| TcCLB.509715.23  | RNA-binding protein, putative                             | -0,379  | 0,1872     |
| TcCLB.508121.150 | trans-sialidase, Group V, putative                        | -0,379  | 0,2878     |
| TcCLB.506275.80  | hypothetical protein, conserved                           | -0,3791 | 0,0208     |
| TcCLB.509795.10  | hypothetical protein, conserved                           | -0,3793 | 0,002093   |
| TcCLB.506973.5   | mucin-associated surface protein (MASP), putative         | -0,3794 | 0,5621     |
| TcCLB.509611.110 | RNA-editing complex protein, putative                     | -0,3796 | 0,00502    |
| TcCLB.507991.126 | hypothetical protein, conserved                           | -0,3796 | 0,09964    |
| TcCLB.504159.30  | hypothetical protein, conserved                           | -0,3797 | 0,006664   |
| TcCLB.507683.30  | hypothetical protein, conserved                           | -0,3798 | 0,0002388  |

|                  |                                                       |         |            |
|------------------|-------------------------------------------------------|---------|------------|
| TcCLB.511229.120 | hypothetical protein                                  | -0,3799 | 0,03249    |
| TcCLB.509581.20  | beta galactofuranosyl glycosyltransferase, putative   | -0,3802 | 0,02199    |
| TcCLB.506633.100 | hypothetical protein, conserved                       | -0,3803 | 0,02437    |
| TcCLB.506411.25  | hypothetical protein, conserved (pseudogene)          | -0,3803 | 0,0589     |
| TcCLB.508277.150 | proliferative cell nuclear antigen (PCNA), putative   | -0,3804 | 3,443E-06  |
| TcCLB.508413.10  | hypothetical protein, conserved                       | -0,3804 | 0,001543   |
| TcCLB.504043.10  | hypothetical protein, conserved                       | -0,3805 | 0,0001712  |
| TcCLB.508699.50  | hypothetical protein, conserved                       | -0,3805 | 0,003119   |
| TcCLB.511279.50  | hypothetical protein, conserved                       | -0,3807 | 0,018      |
| TcCLB.510013.170 | mucin-associated surface protein (MASP), putative     | -0,3807 | 0,5199     |
| TcCLB.510225.10  | histone H1, putative                                  | -0,3808 | 1,932E-07  |
| TcCLB.508061.130 | trans-sialidase (pseudogene), putative                | -0,3809 | 0,0004529  |
| TcCLB.504147.170 | gamma-tubulin complex subunit, putative               | -0,381  | 0,00002531 |
| TcCLB.507025.40  | hypothetical protein                                  | -0,381  | 0,01213    |
| TcCLB.508277.170 | hypothetical protein, conserved                       | -0,381  | 0,07308    |
| TcCLB.511153.144 | hypothetical protein, conserved                       | -0,381  | 0,2027     |
| TcCLB.507649.100 | hypothetical protein, conserved                       | -0,3811 | 0,0000893  |
| TcCLB.511215.40  | hypothetical protein, conserved                       | -0,3811 | 0,0002771  |
| TcCLB.503843.40  | chaperone DNAJ protein, putative (fragment)           | -0,3811 | 0,0006568  |
| TcCLB.506817.20  | ABC transporter, putative                             | -0,3811 | 0,0009245  |
| TcCLB.511599.85  | elongation factor 1-gamma (EF-1-gamma, pseudogene), p | -0,3811 | 0,6202     |
| TcCLB.511603.170 | mucin TcMUCII, putative                               | -0,3812 | 0,504      |
| TcCLB.509161.110 | hypothetical protein, conserved                       | -0,3813 | 0,00002983 |
| TcCLB.507969.54  | hypothetical protein, conserved                       | -0,3813 | 0,006958   |
| TcCLB.508585.20  | hypothetical protein, conserved                       | -0,3814 | 0,01534    |
| TcCLB.511717.60  | hypothetical protein, conserved                       | -0,3814 | 0,0182     |
| TcCLB.511173.160 | trans-sialidase (pseudogene), putative                | -0,3815 | 0,27       |
| TcCLB.510669.9   | hypothetical protein, conserved                       | -0,3816 | 0,02069    |
| TcCLB.506155.90  | hypothetical protein, conserved (pseudogene)          | -0,3817 | 0,00001735 |
| TcCLB.503697.20  | hypothetical protein, conserved                       | -0,3817 | 0,00195    |
| TcCLB.511277.92  | hypothetical protein, conserved                       | -0,3817 | 0,001989   |
| TcCLB.510943.60  | U2 splicing auxiliary factor, putative (u2af26)       | -0,3818 | 0,00004365 |
| TcCLB.508823.152 | hypothetical protein (fragment)                       | -0,3818 | 0,006528   |
| TcCLB.504887.10  | dispersed gene family protein 1 (DGF-1), putative     | -0,3819 | 0,01556    |
| TcCLB.457977.10  | trans-sialidase, putative (fragment)                  | -0,3819 | 0,3569     |
| TcCLB.506637.100 | tyrosine phosphatase isoform, putative                | -0,382  | 0,003902   |
| TcCLB.510487.37  | trans-sialidase (pseudogene), putative                | -0,3821 | 0,2348     |
| TcCLB.510043.29  | hypothetical protein, conserved                       | -0,3822 | 0,09918    |
| TcCLB.510879.40  | Carboxypeptidase Nna1-like protein, putative          | -0,3823 | 0,0001296  |
| TcCLB.508375.10  | mucin-associated surface protein (MASP), putative     | -0,3823 | 0,1968     |
| TcCLB.507711.240 | hypothetical protein, conserved                       | -0,3825 | 0,001867   |
| TcCLB.510187.460 | hypothetical protein                                  | -0,3825 | 0,003179   |
| TcCLB.508919.80  | hypothetical protein, conserved                       | -0,3825 | 0,01583    |
| TcCLB.511167.80  | PIF1 helicase-like protein, putative                  | -0,3827 | 0,0001342  |
| TcCLB.509039.4   | aspartyl-tRNA synthetase, putative                    | -0,3828 | 0,02741    |



|                  |                                                            |         |            |
|------------------|------------------------------------------------------------|---------|------------|
| TcCLB.509069.49  | DNA replication licensing factor MCM7, putative (fragment) | -0,3828 | 0,0533     |
| TcCLB.506983.30  | hypothetical protein, conserved                            | -0,383  | 0,0005294  |
| TcCLB.457251.10  | 3-oxo-5-alpha-steroid 4-dehydrogenase, putative (fragment) | -0,383  | 0,0008904  |
| TcCLB.508461.540 | hypothetical protein, conserved                            | -0,383  | 0,004667   |
| TcCLB.509179.231 | trans-sialidase (pseudogene), putative                     | -0,383  | 0,2525     |
| TcCLB.511211.100 | hypothetical protein, conserved                            | -0,3832 | 0,002834   |
| TcCLB.508839.30  | trafficking protein particle complex subunit 3, putative   | -0,3833 | 0,1344     |
| TcCLB.506729.50  | hypothetical protein, conserved                            | -0,3834 | 0,00005431 |
| TcCLB.506737.70  | ubiquitin-like protein, putative                           | -0,3835 | 1,168E-06  |
| TcCLB.506743.60  | hypothetical protein, conserved                            | -0,3836 | 0,0002907  |
| TcCLB.507709.20  | hypothetical protein                                       | -0,3837 | 0,0006621  |
| TcCLB.509055.50  | hypothetical protein, conserved                            | -0,3837 | 0,006694   |
| TcCLB.510043.40  | hypothetical protein, conserved                            | -0,3838 | 0,002534   |
| TcCLB.509999.70  | hypothetical protein, conserved                            | -0,3839 | 0,0007927  |
| TcCLB.508547.70  | Present in the outer mitochondrial membrane proteome 3:    | -0,3839 | 0,004971   |
| TcCLB.507993.380 | hypothetical protein, conserved                            | -0,3839 | 0,008635   |
| TcCLB.509567.4   | hypothetical protein, conserved                            | -0,3839 | 0,01282    |
| TcCLB.510445.50  | S-adenosylmethionine synthetase, putative (METK1)          | -0,384  | 0,00001524 |
| TcCLB.407477.69  | hypothetical protein, conserved (fragment)                 | -0,384  | 0,01349    |
| TcCLB.508323.110 | hypothetical protein, conserved                            | -0,3841 | 0,0141     |
| TcCLB.509937.90  | hypothetical protein, conserved                            | -0,3842 | 0,003582   |
| TcCLB.416883.18  | proteasome alpha 2 subunit, putative                       | -0,3843 | 0,00432    |
| TcCLB.507771.110 | hypothetical protein, conserved                            | -0,3844 | 0,003912   |
| TcCLB.503869.20  | hypothetical protein, conserved                            | -0,3844 | 0,03968    |
| TcCLB.506989.300 | receptor-type adenylate cyclase (pseudogene), putative     | -0,3845 | 0,0004681  |
| TcCLB.510055.130 | hypothetical protein, conserved (pseudogene)               | -0,3847 | 0,004915   |
| TcCLB.503449.30  | clathrin coat assembly protein, putative                   | -0,3848 | 0,000203   |
| TcCLB.509875.160 | dispersed gene family protein 1 (DGF-1), putative          | -0,385  | 0,03255    |
| TcCLB.510741.90  | hypothetical protein, conserved                            | -0,3851 | 0,0239     |
| TcCLB.506885.210 | trans-sialidase, Group III, putative                       | -0,3851 | 0,04526    |
| TcCLB.509371.10  | dispersed gene family protein 1 (DGF-1), putative          | -0,3851 | 0,4119     |
| TcCLB.504105.230 | nuclear cap binding complex subunit CBP110, putative (CBI) | -0,3852 | 0,0005057  |
| TcCLB.503915.9   | hypothetical protein, conserved (fragment)                 | -0,3852 | 0,002732   |
| TcCLB.506297.170 | hypothetical protein, conserved                            | -0,3852 | 0,04502    |
| TcCLB.510731.100 | hypothetical protein, conserved                            | -0,3853 | 0,01247    |
| TcCLB.506941.159 | zinc finger protein, putative                              | -0,3854 | 0,0007496  |
| TcCLB.511707.20  | hypothetical protein                                       | -0,3854 | 0,01938    |
| TcCLB.511217.190 | hypothetical protein, conserved                            | -0,3854 | 0,2326     |
| TcCLB.508625.130 | stress-inducible protein STI1-like, putative               | -0,3857 | 0,04913    |
| TcCLB.506559.148 | hypothetical protein, conserved                            | -0,3858 | 0,01861    |
| TcCLB.506671.20  | mucin TcMUC (pseudogene), putative                         | -0,3858 | 0,3675     |
| TcCLB.509491.10  | hypothetical protein, conserved                            | -0,386  | 0,009298   |
| TcCLB.508183.10  | ubiquinone biosynthesis protein COQ7 homolog, putative     | -0,386  | 0,0116     |
| TcCLB.508825.10  | surface protease GP63, putative                            | -0,386  | 0,0147     |
| TcCLB.509737.9   | trans-sialidase, putative (fragment)                       | -0,386  | 0,2178     |

|                  |                                                               |         |            |
|------------------|---------------------------------------------------------------|---------|------------|
| TcCLB.507143.50  | hypothetical protein, conserved                               | -0,3861 | 0,0003901  |
| TcCLB.503467.30  | oligosaccharyl transferase subunit, putative                  | -0,3862 | 0,001574   |
| TcCLB.510719.290 | Golgi SNAP receptor complex member 1, putative                | -0,3862 | 0,01718    |
| TcCLB.511127.120 | cysteine peptidase, Clan CA, family C19, putative             | -0,3863 | 0,009168   |
| TcCLB.507237.10  | trans-sialidase, Group V, putative                            | -0,3864 | 0,2263     |
| TcCLB.506195.200 | hypothetical protein, conserved                               | -0,3865 | 0,00002636 |
| TcCLB.503565.20  | hypothetical protein, conserved                               | -0,3865 | 0,005842   |
| TcCLB.509569.44  | Present in the outer mitochondrial membrane proteome 4l       | -0,3865 | 0,01259    |
| TcCLB.471901.20  | SNARE protein, putative                                       | -0,3866 | 0,005621   |
| TcCLB.508625.30  | ARP2/3 complex subunit, putative                              | -0,3868 | 0,08047    |
| TcCLB.503521.20  | hypothetical protein, conserved                               | -0,3869 | 0,001986   |
| TcCLB.506485.90  | hypothetical protein, conserved                               | -0,387  | 0,0006898  |
| TcCLB.510143.30  | hypothetical protein, conserved                               | -0,387  | 0,002492   |
| TcCLB.510715.150 | trans-sialidase, Group VI, putative                           | -0,387  | 0,2429     |
| TcCLB.407477.20  | hypothetical protein, conserved                               | -0,3871 | 0,04032    |
| TcCLB.511041.10  | hypothetical protein, conserved                               | -0,3873 | 0,00316    |
| TcCLB.509109.170 | tubulin tyrosine ligase (pseudogene), putative                | -0,3873 | 0,01102    |
| TcCLB.506457.149 | hypothetical protein, conserved (fragment)                    | -0,3873 | 0,04403    |
| TcCLB.506863.4   | dephospho-CoA kinase, putative                                | -0,3873 | 0,2156     |
| TcCLB.511895.30  | receptor-type adenylate cyclase, putative                     | -0,3873 | 0,2352     |
| TcCLB.510657.40  | hypothetical protein, conserved                               | -0,3874 | 0,002462   |
| TcCLB.511419.40  | phosphoglycerate kinase, putative                             | -0,3875 | 0,00009019 |
| TcCLB.509693.190 | ABC transporter, putative                                     | -0,3875 | 0,007152   |
| TcCLB.510889.150 | hypothetical protein, conserved                               | -0,3875 | 0,01839    |
| TcCLB.506493.50  | serine/threonine protein kinase, putative                     | -0,3875 | 0,08638    |
| TcCLB.506813.200 | mucin-like glycoprotein (pseudogene), putative                | -0,3876 | 0,5193     |
| TcCLB.510989.50  | hypothetical protein, conserved                               | -0,3877 | 1,121E-06  |
| TcCLB.508411.10  | cofilin/actin depolymerizing factor, putative                 | -0,3877 | 0,0004958  |
| TcCLB.506295.50  | hypothetical protein, conserved                               | -0,3877 | 0,05401    |
| TcCLB.511473.6   | ATP-dependent DEAD/H RNA helicase (pseudogene), putative      | -0,3878 | 0,2713     |
| TcCLB.508717.10  | tyrosine specific protein phosphatase, putative               | -0,3879 | 0,0002909  |
| TcCLB.511391.130 | hypothetical protein, conserved                               | -0,388  | 0,02396    |
| TcCLB.505807.209 | hypothetical protein, conserved                               | -0,388  | 0,0523     |
| TcCLB.511553.150 | mucin-associated surface protein (MASP), putative             | -0,388  | 0,2959     |
| TcCLB.508153.860 | hypothetical protein, conserved                               | -0,3882 | 0,00008171 |
| TcCLB.509429.110 | proteasome beta-1 subunit, putative                           | -0,3883 | 0,0001623  |
| TcCLB.482319.10  | hypothetical protein, conserved                               | -0,3883 | 0,001268   |
| TcCLB.506871.100 | polypeptide deformylase-like protein, putative                | -0,3883 | 0,003006   |
| TcCLB.508139.135 | retrotransposon hot spot protein (RHS, pseudogene), putative  | -0,3883 | 0,01379    |
| TcCLB.511265.10  | dispersed gene family protein 1 (DGF-1, pseudogene), putative | -0,3883 | 0,02143    |
| TcCLB.511283.210 | hypothetical protein, conserved                               | -0,3884 | 0,00007507 |
| TcCLB.503473.10  | protein kinase, putative                                      | -0,3884 | 0,002624   |
| TcCLB.505121.9   | dispersed gene family protein 1 (DGF-1), putative (fragment)  | -0,3884 | 0,0482     |
| TcCLB.508221.64  | syntaxin binding protein (pseudogene), putative               | -0,3884 | 0,3231     |
| TcCLB.508347.60  | hypothetical protein, conserved                               | -0,3886 | 0,04355    |

|                  |                                                                |         |           |
|------------------|----------------------------------------------------------------|---------|-----------|
| TcCLB.503885.80  | hypothetical protein, conserved                                | -0,3887 | 0,005383  |
| TcCLB.507129.10  | actin 2, putative                                              | -0,3887 | 0,04943   |
| TcCLB.510221.10  | RNA pseudouridylate synthase, putative                         | -0,3888 | 0,002208  |
| TcCLB.511553.80  | hypothetical protein, conserved                                | -0,3888 | 0,5343    |
| TcCLB.504883.30  | hypothetical protein, conserved                                | -0,3889 | 0,0000563 |
| TcCLB.508747.50  | mucin TcMUCII, putative                                        | -0,3889 | 0,2692    |
| TcCLB.510141.20  | hypothetical protein, conserved                                | -0,3891 | 0,00801   |
| TcCLB.510201.20  | mucin-associated surface protein (MASP), putative              | -0,3891 | 0,4086    |
| TcCLB.509453.60  | hypothetical protein, conserved                                | -0,3893 | 0,0002381 |
| TcCLB.511127.274 | hypothetical protein, conserved                                | -0,3893 | 0,02894   |
| TcCLB.508745.70  | mucin-associated surface protein (MASP), putative (fragm       | -0,3894 | 0,6826    |
| TcCLB.507257.30  | hypothetical protein, conserved                                | -0,3895 | 0,02157   |
| TcCLB.506415.30  | hypothetical protein, conserved                                | -0,3896 | 0,01705   |
| TcCLB.510597.9   | tousled-like kinase II, putative                               | -0,3899 | 0,006469  |
| TcCLB.503919.30  | hypothetical protein, conserved                                | -0,3899 | 0,01265   |
| TcCLB.507611.310 | eukaryotic translation initiation factor 3 subunit 8, putative | -0,3901 | 4,558E-06 |
| TcCLB.503809.10  | hypothetical protein, conserved                                | -0,3901 | 0,000179  |
| TcCLB.507011.140 | DNA-repair protein, putative                                   | -0,3902 | 0,0007453 |
| TcCLB.507037.50  | exonuclease, putative                                          | -0,3904 | 0,02856   |
| TcCLB.506811.30  | hypothetical protein, conserved                                | -0,3905 | 0,001517  |
| TcCLB.506973.105 | mucin-associated surface protein (MASP, pseudogene), pu        | -0,3905 | 0,3292    |
| TcCLB.510421.314 | U6 snRNA-associated Sm-like protein LSm8p                      | -0,3906 | 0,05504   |
| TcCLB.510885.10  | hypothetical protein, conserved                                | -0,3907 | 0,003167  |
| TcCLB.508403.10  | hypothetical protein, conserved                                | -0,3908 | 0,0007778 |
| TcCLB.506297.120 | hypothetical protein, conserved                                | -0,3908 | 0,001741  |
| TcCLB.507837.40  | hypothetical protein, conserved                                | -0,3908 | 0,02523   |
| TcCLB.507485.45  | hypothetical protein, conserved                                | -0,391  | 0,09545   |
| TcCLB.506201.130 | hypothetical protein, conserved                                | -0,3913 | 0,002466  |
| TcCLB.507949.154 | TFIIH basal transcription factor subunit, putative (TSP1)      | -0,3913 | 0,00779   |
| TcCLB.510607.75  | hypothetical protein, conserved (pseudogene)                   | -0,3913 | 0,1363    |
| TcCLB.510397.20  | trans-sialidase (pseudogene), putative                         | -0,3913 | 0,3862    |
| TcCLB.508245.50  | hypothetical protein                                           | -0,3914 | 0,1298    |
| TcCLB.507237.100 | mucin-associated surface protein (MASP), putative              | -0,3914 | 0,5586    |
| TcCLB.504151.39  | hypothetical protein, conserved                                | -0,3915 | 0,002212  |
| TcCLB.432067.20  | hypothetical protein, conserved (pseudogene)                   | -0,3915 | 0,1589    |
| TcCLB.508169.20  | elongation factor 2, putative                                  | -0,3916 | 3,236E-10 |
| TcCLB.510661.60  | glycerol kinase, glycosomal, putative                          | -0,3917 | 0,0001575 |
| TcCLB.508647.170 | DNA polymerase theta (polymerase domain only), putative        | -0,3917 | 0,0002824 |
| TcCLB.510187.234 | tyrosine specific protein phosphatase, putative                | -0,3917 | 0,001095  |
| TcCLB.508001.30  | hypothetical protein, conserved (pseudogene)                   | -0,3918 | 0,02661   |
| TcCLB.511291.70  | hypothetical protein, conserved                                | -0,3919 | 0,0002617 |
| TcCLB.510317.14  | hypothetical protein, conserved                                | -0,3919 | 0,005441  |
| TcCLB.511921.71  | hypothetical protein, conserved (pseudogene)                   | -0,3919 | 0,2225    |
| TcCLB.509719.50  | protein kinase, putative                                       | -0,392  | 0,003146  |
| TcCLB.508815.160 | ER lumen retaining receptor protein, putative                  | -0,3921 | 0,0002905 |

|                  |                                                     |         |            |
|------------------|-----------------------------------------------------|---------|------------|
| TcCLB.506989.160 | PTS2 receptor, putative (PEX7)                      | -0,3921 | 0,001024   |
| TcCLB.508545.9   | hypothetical protein, conserved                     | -0,3922 | 0,03042    |
| TcCLB.511277.560 | synaptotagmin, putative                             | -0,3923 | 0,007587   |
| TcCLB.504079.10  | branch point binding protein, putative              | -0,3927 | 0,0063     |
| TcCLB.510055.70  | hypothetical protein, conserved                     | -0,3929 | 0,001736   |
| TcCLB.505807.40  | hypothetical protein, conserved                     | -0,393  | 0,00001777 |
| TcCLB.509847.50  | trans-sialidase (pseudogene), putative              | -0,393  | 0,2756     |
| TcCLB.511211.40  | molybdenum cofactor biosynthesis protein, putative  | -0,3931 | 0,001136   |
| TcCLB.505183.84  | hypothetical protein, conserved                     | -0,3931 | 0,006143   |
| TcCLB.508305.9   | trans-sialidase, putative                           | -0,3932 | 0,2525     |
| TcCLB.506893.80  | monothiol glutaredoxin, putative                    | -0,3933 | 0,03995    |
| TcCLB.506647.20  | hypothetical protein, conserved                     | -0,3934 | 0,000345   |
| TcCLB.509685.27  | surface protease GP63 (pseudogene), putative        | -0,3934 | 0,4793     |
| TcCLB.508707.80  | RNA-binding protein, putative                       | -0,3935 | 0,003037   |
| TcCLB.508139.155 | protein kinase (pseudogene), putative               | -0,3937 | 0,03678    |
| TcCLB.507663.60  | hypothetical protein, conserved                     | -0,3938 | 0,004485   |
| TcCLB.510089.130 | protein kinase, putative                            | -0,3939 | 0,0000538  |
| TcCLB.507049.119 | hypothetical protein, conserved                     | -0,3939 | 0,0002724  |
| TcCLB.506577.130 | protein phosphatase 2A regulatory subunit, putative | -0,3939 | 0,002812   |
| TcCLB.510901.50  | C-terminal motor kinesin, putative                  | -0,3941 | 0,0002304  |
| TcCLB.507601.140 | ATP-dependent RNA helicase, putative                | -0,3941 | 0,0003964  |
| TcCLB.510101.490 | anion-transporting ATPase-like, putative            | -0,3942 | 0,0001107  |
| TcCLB.511803.70  | hypothetical protein, conserved                     | -0,3942 | 0,005657   |
| TcCLB.506249.30  | hypothetical protein, conserved                     | -0,3943 | 0,09194    |
| TcCLB.506179.59  | ATP-dependent RNA helicase, putative (fragment)     | -0,3944 | 0,07878    |
| TcCLB.510877.60  | ruvB-like DNA helicase, putative (RUVBL)            | -0,3946 | 5,766E-07  |
| TcCLB.504125.30  | ubiquitin carboxyl-terminal hydrolase, putative     | -0,3946 | 0,00001034 |
| TcCLB.503611.30  | hypothetical protein, conserved                     | -0,3946 | 0,002777   |
| TcCLB.508197.20  | ADP-ribosylation factor, putative                   | -0,3946 | 0,02567    |
| TcCLB.508413.30  | hypothetical protein, conserved                     | -0,3947 | 0,00006481 |
| TcCLB.508065.60  | hypothetical protein, conserved                     | -0,3947 | 0,001584   |
| TcCLB.510979.40  | trans-sialidase, Group V, putative                  | -0,3947 | 0,05278    |
| TcCLB.507023.20  | hypothetical protein                                | -0,3948 | 0,01668    |
| TcCLB.508691.20  | hypothetical protein, conserved                     | -0,3949 | 0,007445   |
| TcCLB.510159.10  | hypothetical protein, conserved                     | -0,3949 | 0,009841   |
| TcCLB.509693.120 | hypothetical protein, conserved                     | -0,395  | 0,0004286  |
| TcCLB.506363.120 | hypothetical protein, conserved                     | -0,3951 | 0,01412    |
| TcCLB.506625.249 | RNA pseudouridylate synthase protein, putative      | -0,3952 | 0,0004435  |
| TcCLB.508147.150 | mucin-associated surface protein (MASP), putative   | -0,3953 | 0,3586     |
| TcCLB.509733.170 | Valosin-containing protein, putative (VCP)          | -0,3955 | 2,172E-06  |
| TcCLB.504057.97  | hypothetical protein, conserved                     | -0,3955 | 0,003602   |
| TcCLB.510969.10  | hypothetical protein, conserved                     | -0,3955 | 0,007216   |
| TcCLB.508873.510 | mucin-associated surface protein (MASP), putative   | -0,3955 | 0,3163     |
| TcCLB.507089.60  | hypothetical protein, conserved                     | -0,3956 | 0,002108   |
| TcCLB.506435.220 | hypothetical protein, conserved                     | -0,3956 | 0,03351    |

|                  |                                                               |         |            |
|------------------|---------------------------------------------------------------|---------|------------|
| TcCLB.506925.30  | hypothetical protein, conserved                               | -0,3957 | 6,337E-08  |
| TcCLB.506279.140 | trans-sialidase, Group V, putative                            | -0,3957 | 0,1387     |
| TcCLB.511003.170 | hypothetical protein, conserved                               | -0,3959 | 0,01564    |
| TcCLB.504703.10  | glycosyl hydrolase (pseudogene), putative                     | -0,396  | 0,00004885 |
| TcCLB.503955.30  | hypothetical protein, conserved                               | -0,3961 | 0,004701   |
| TcCLB.503417.40  | hypothetical protein                                          | -0,3961 | 0,4781     |
| TcCLB.507901.30  | retrotransposon hot spot protein (RHS, pseudogene), putative  | -0,3962 | 0,00979    |
| TcCLB.511127.240 | hypothetical protein, conserved                               | -0,3962 | 0,1897     |
| TcCLB.508421.40  | hypothetical protein, conserved (pseudogene)                  | -0,3963 | 0,3879     |
| TcCLB.511131.20  | hypothetical protein, conserved                               | -0,3965 | 0,001553   |
| TcCLB.510841.30  | hypothetical protein                                          | -0,3965 | 0,1682     |
| TcCLB.511867.50  | proteasome alpha 7 subunit, putative                          | -0,3966 | 0,00124    |
| TcCLB.504021.90  | hypothetical protein                                          | -0,3966 | 0,006589   |
| TcCLB.505807.254 | hypothetical protein                                          | -0,3966 | 0,05601    |
| TcCLB.507063.160 | hypothetical protein, conserved                               | -0,3967 | 0,0002605  |
| TcCLB.503557.14  | hypothetical protein, conserved                               | -0,3967 | 0,002032   |
| TcCLB.508517.9   | dispersed gene family protein 1 (DGF-1), putative             | -0,3967 | 0,1211     |
| TcCLB.509579.32  | N-acetyltransferase complex ARD1 subunit (pseudogene),        | -0,3967 | 0,2863     |
| TcCLB.506247.150 | hypothetical protein, conserved                               | -0,3968 | 0,02086    |
| TcCLB.511017.69  | histone acetyltransferase, putative (fragment)                | -0,3968 | 0,1192     |
| TcCLB.511145.80  | RNA polymerase II, putative                                   | -0,3969 | 0,01239    |
| TcCLB.507625.183 | SNARE domain-containing protein, putative (SNARE2.1)          | -0,3969 | 0,01851    |
| TcCLB.507953.100 | trans-sialidase, Group V, putative                            | -0,3969 | 0,209      |
| TcCLB.506363.159 | separase, putative                                            | -0,397  | 0,3263     |
| TcCLB.504407.10  | dispersed gene family protein 1 (DGF-1, pseudogene), putative | -0,3971 | 0,2276     |
| TcCLB.507063.260 | hypothetical protein                                          | -0,3972 | 0,2406     |
| TcCLB.511577.160 | hypothetical protein, conserved                               | -0,3974 | 0,002731   |
| TcCLB.508221.530 | trans-sialidase (pseudogene), putative                        | -0,3975 | 0,3339     |
| TcCLB.503653.104 | hypothetical protein, conserved                               | -0,3975 | 0,3755     |
| TcCLB.511233.40  | hypothetical protein, conserved                               | -0,3976 | 0,0002679  |
| TcCLB.511321.26  | vesicle transport v-SNARE protein, putative                   | -0,3976 | 0,01669    |
| TcCLB.507837.90  | cell division cycle protein, putative                         | -0,3977 | 0,008743   |
| TcCLB.510761.70  | ubiquitin hydrolase, putative                                 | -0,3979 | 0,00003574 |
| TcCLB.504259.19  | hypothetical protein, conserved                               | -0,3979 | 0,006938   |
| TcCLB.506743.10  | hypothetical protein                                          | -0,3979 | 0,04911    |
| TcCLB.509179.120 | hypothetical protein, conserved                               | -0,3979 | 0,06401    |
| TcCLB.504839.60  | hypothetical protein, conserved                               | -0,398  | 0,002201   |
| TcCLB.507049.30  | hypothetical protein, conserved                               | -0,398  | 0,01159    |
| TcCLB.505941.49  | hypothetical protein, conserved                               | -0,398  | 0,02129    |
| TcCLB.506287.200 | DNA ligase, putative                                          | -0,398  | 0,02463    |
| TcCLB.427355.10  | oligosaccharyl transferase subunit, putative (fragment)       | -0,3981 | 0,009094   |
| TcCLB.509611.120 | hypothetical protein, conserved                               | -0,3981 | 0,009165   |
| TcCLB.510763.90  | hypothetical protein, conserved                               | -0,3981 | 0,01939    |
| TcCLB.510269.60  | trans-sialidase (pseudogene), putative                        | -0,3981 | 0,1583     |
| TcCLB.408345.20  | 2-oxoglutarate dehydrogenase subunit, putative (fragment)     | -0,3983 | 0,01616    |

|                  |                                                          |         |            |
|------------------|----------------------------------------------------------|---------|------------|
| TcCLB.510515.139 | T-complex protein 1, gamma subunit, putative             | -0,3984 | 0,002443   |
| TcCLB.506221.80  | NAD synthase, putative                                   | -0,3984 | 0,01707    |
| TcCLB.506769.30  | mucin-associated surface protein (MASP), putative        | -0,3985 | 0,1914     |
| TcCLB.507019.130 | hypothetical protein                                     | -0,3986 | 0,02318    |
| TcCLB.511529.190 | hypothetical protein, conserved                          | -0,3986 | 0,03447    |
| TcCLB.509991.110 | transcription elongation factor 1 homolog (ELOF1)        | -0,3988 | 0,01002    |
| TcCLB.503733.20  | 6-phosphofructo-2-kinase/fructose-2,6-biphosphatase, put | -0,3989 | 0,001181   |
| TcCLB.508099.9   | mucin-associated surface protein (MASP, pseudogene), pu  | -0,399  | 0,2967     |
| TcCLB.504011.40  | XPA-interacting protein, putative                        | -0,3992 | 0,001525   |
| TcCLB.506177.80  | hypothetical protein, conserved                          | -0,3992 | 0,09499    |
| TcCLB.510575.30  | hypothetical protein, conserved                          | -0,3994 | 0,00044    |
| TcCLB.507601.60  | hypothetical protein, conserved                          | -0,3994 | 0,01754    |
| TcCLB.506247.50  | CCT-theta, putative                                      | -0,3995 | 1,273E-11  |
| TcCLB.510733.10  | p21-activated kinase 3, putative                         | -0,3995 | 6,481E-07  |
| TcCLB.511593.65  | hypothetical protein                                     | -0,3995 | 0,3776     |
| TcCLB.508207.200 | small GTP-binding protein, putative                      | -0,3996 | 0,001084   |
| TcCLB.508153.360 | hypothetical protein, conserved                          | -0,3996 | 0,02497    |
| TcCLB.510659.60  | hypothetical protein, conserved                          | -0,3997 | 0,02396    |
| TcCLB.508467.10  | hypothetical protein, conserved                          | -0,3997 | 0,1066     |
| TcCLB.506973.61  | hypothetical protein, conserved (pseudogene)             | -0,3997 | 0,1136     |
| TcCLB.506327.30  | hypothetical protein, conserved                          | -0,3998 | 0,00000241 |
| TcCLB.511627.120 | aldo/keto reductase, putative                            | -0,3998 | 0,004966   |
| TcCLB.469785.20  | hypothetical protein, conserved                          | -0,3998 | 0,02698    |
| TcCLB.510571.10  | hypothetical protein, conserved                          | -0,3998 | 0,0503     |
| TcCLB.504057.140 | ADP/ATP mitochondrial carrier protein, putative          | -0,3999 | 0,0001111  |
| TcCLB.506693.7   | hypothetical protein, conserved                          | -0,3999 | 0,05332    |
| TcCLB.506275.50  | Golgi SNAP receptor complex member 1, putative           | -0,4    | 0,01665    |
| TcCLB.508547.20  | pre-rRNA-processing protein tsr1 homolog                 | -0,4001 | 0,0002576  |
| TcCLB.511755.50  | hypothetical protein, conserved                          | -0,4001 | 0,002236   |
| TcCLB.511201.58  | hypothetical protein                                     | -0,4001 | 0,002876   |
| TcCLB.510963.60  | hypothetical protein, conserved                          | -0,4001 | 0,006104   |
| TcCLB.504021.70  | hypothetical protein, conserved                          | -0,4002 | 0,002534   |
| TcCLB.508979.30  | mucin TcMUCII, putative                                  | -0,4002 | 0,192      |
| TcCLB.510279.110 | trans-sialidase, Group VI, putative                      | -0,4002 | 0,3318     |
| TcCLB.508347.130 | deoxyhypusine hydroxylase, putative                      | -0,4004 | 0,02645    |
| TcCLB.507517.90  | nucleotide-binding protein, putative                     | -0,4005 | 0,003511   |
| TcCLB.506657.50  | ADP/ATP mitochondrial carrier protein (pseudogene), puta | -0,4005 | 0,003679   |
| TcCLB.509875.120 | trans-sialidase, Group II, putative                      | -0,4006 | 0,01496    |
| TcCLB.506961.30  | hypothetical protein                                     | -0,4006 | 0,1829     |
| TcCLB.506515.10  | FG-GAP repeat protein, putative                          | -0,4007 | 0,0003482  |
| TcCLB.511211.140 | hypothetical protein, conserved                          | -0,4008 | 0,0007712  |
| TcCLB.510355.10  | dispersed gene family protein 1 (DGF-1), putative        | -0,4008 | 0,01192    |
| TcCLB.508123.10  | hypothetical protein, conserved                          | -0,4008 | 0,04647    |
| TcCLB.508787.30  | pumilio/PUF RNA binding protein 3, putative (PUF3)       | -0,4009 | 0,0003469  |
| TcCLB.511907.100 | hypothetical protein, conserved                          | -0,401  | 0,001079   |

|                  |                                                           |         |            |
|------------------|-----------------------------------------------------------|---------|------------|
| TcCLB.503719.39  | hypothetical protein, conserved                           | -0,401  | 0,008731   |
| TcCLB.506839.60  | tyrosine specific protein phosphatase, putative           | -0,4011 | 0,0002346  |
| TcCLB.510689.40  | phosphatidylinositol 3-kinase (tor2), putative (TOR2)     | -0,4012 | 9,819E-07  |
| TcCLB.503541.40  | hypothetical protein, conserved                           | -0,4013 | 0,003162   |
| TcCLB.509627.20  | hypothetical protein, conserved                           | -0,4014 | 0,000651   |
| TcCLB.419833.10  | vacuolar protein sorting 18, putative                     | -0,4014 | 0,02046    |
| TcCLB.510431.340 | hypothetical protein, conserved                           | -0,4015 | 0,03956    |
| TcCLB.510611.70  | hypothetical protein, conserved                           | -0,4017 | 0,0005419  |
| TcCLB.510043.59  | hypothetical protein, conserved (fragment)                | -0,4017 | 0,001129   |
| TcCLB.509595.60  | hypothetical protein, conserved                           | -0,4018 | 0,01239    |
| TcCLB.411427.49  | hypothetical protein, conserved (fragment)                | -0,4018 | 0,1266     |
| TcCLB.504057.110 | ribosomal RNA processing protein 6, putative (RRP6)       | -0,4019 | 0,00002068 |
| TcCLB.509029.130 | cyclin 1 (CYC1)                                           | -0,4019 | 0,005707   |
| TcCLB.510939.9   | hypothetical protein, conserved                           | -0,402  | 0,1003     |
| TcCLB.508799.30  | hypothetical protein, conserved                           | -0,4021 | 0,002005   |
| TcCLB.503797.4   | hypothetical protein, conserved                           | -0,4022 | 0,0007717  |
| TcCLB.505607.9   | dispersed gene family protein 1 (DGF-1), putative         | -0,4022 | 0,115      |
| TcCLB.508175.210 | hypothetical protein, conserved                           | -0,4023 | 0,04838    |
| TcCLB.506195.240 | hypothetical protein, conserved                           | -0,4025 | 0,0002426  |
| TcCLB.505075.20  | hypothetical protein                                      | -0,4025 | 0,05452    |
| TcCLB.506133.120 | syntaxin binding protein (pseudogene), putative           | -0,4025 | 0,4064     |
| TcCLB.511779.31  | hypothetical protein                                      | -0,4025 | 0,424      |
| TcCLB.509719.26  | hypothetical protein, conserved                           | -0,4026 | 0,0003459  |
| TcCLB.508635.10  | hypothetical protein                                      | -0,4026 | 0,1499     |
| TcCLB.510601.30  | hypothetical protein, conserved                           | -0,4027 | 0,001079   |
| TcCLB.508409.170 | hypothetical protein, conserved                           | -0,4027 | 0,00631    |
| TcCLB.511285.10  | hypothetical protein                                      | -0,4028 | 0,00003534 |
| TcCLB.506983.20  | hypothetical protein, conserved                           | -0,4028 | 0,0002501  |
| TcCLB.510897.10  | cullin 2, putative                                        | -0,4028 | 0,001565   |
| TcCLB.511529.130 | hypothetical protein, conserved                           | -0,4028 | 0,008701   |
| TcCLB.438897.10  | hypothetical protein, conserved                           | -0,4029 | 0,001607   |
| TcCLB.503579.30  | DNA polymerase sigma-like protein, putative               | -0,4029 | 0,006313   |
| TcCLB.410199.4   | kinase, putative (fragment)                               | -0,4031 | 0,04554    |
| TcCLB.511317.50  | hypothetical protein, conserved                           | -0,4032 | 0,0009144  |
| TcCLB.509591.20  | phosphoprotein phosphatase, putative                      | -0,4032 | 0,5365     |
| TcCLB.507951.280 | ABC transporter, putative                                 | -0,4033 | 0,0001367  |
| TcCLB.503987.60  | hypothetical protein, conserved                           | -0,4034 | 0,02141    |
| TcCLB.510285.30  | hypothetical protein, conserved                           | -0,4035 | 0,00148    |
| TcCLB.507017.140 | mitochondrial RNA binding protein 1, putative             | -0,4037 | 0,00006271 |
| TcCLB.508831.140 | surface antigen 2 (CA-2), putative                        | -0,4037 | 0,000762   |
| TcCLB.507581.9   | dispersed gene family protein 1 (DGF-1), putative (fragme | -0,4037 | 0,08499    |
| TcCLB.508737.180 | hypothetical protein, conserved                           | -0,4038 | 2,235E-06  |
| TcCLB.507875.40  | trans-sialidase (pseudogene), putative                    | -0,4038 | 0,01668    |
| TcCLB.510603.90  | mitochondrial carrier protein, putative                   | -0,4039 | 0,03411    |
| TcCLB.508629.68  | N-acetyltransferase complex ARD1 subunit (pseudogene),    | -0,4041 | 0,2023     |

|                  |                                                          |         |            |
|------------------|----------------------------------------------------------|---------|------------|
| TcCLB.510421.290 | Mad2-like HORMA domain containing protein (mad2)         | -0,4042 | 0,001376   |
| TcCLB.504033.200 | hypothetical protein                                     | -0,4043 | 0,002179   |
| TcCLB.508881.10  | hypothetical protein, conserved                          | -0,4043 | 0,02127    |
| TcCLB.503535.9   | hypothetical protein, conserved                          | -0,4044 | 5,322E-06  |
| TcCLB.510181.110 | hypothetical protein, conserved                          | -0,4044 | 0,004011   |
| TcCLB.508839.70  | hypothetical protein, conserved                          | -0,4044 | 0,02613    |
| TcCLB.509539.40  | hypothetical protein, conserved                          | -0,4044 | 0,03889    |
| TcCLB.506265.120 | hypothetical protein, conserved                          | -0,4048 | 0,0002872  |
| TcCLB.476733.20  | hypothetical protein, conserved                          | -0,4049 | 0,00008721 |
| TcCLB.509499.10  | cyclophilin, putative (CYP)                              | -0,4049 | 0,0004819  |
| TcCLB.504239.100 | mucin TcMUCII, putative                                  | -0,4049 | 0,369      |
| TcCLB.503939.4   | hypothetical protein, conserved                          | -0,4049 | 0,4502     |
| TcCLB.506425.100 | hypothetical protein, conserved                          | -0,405  | 0,0005424  |
| TcCLB.506789.150 | hypothetical protein                                     | -0,405  | 0,001014   |
| TcCLB.506887.80  | hypothetical protein, conserved                          | -0,405  | 0,02917    |
| TcCLB.506789.249 | bilobe protein, conserved                                | -0,4051 | 0,0001203  |
| TcCLB.509819.40  | hypothetical protein, conserved                          | -0,4051 | 0,0004782  |
| TcCLB.408437.10  | hypothetical protein, conserved                          | -0,4051 | 0,000541   |
| TcCLB.404711.10  | trans-sialidase (pseudogene), putative                   | -0,4051 | 0,001765   |
| TcCLB.509979.70  | hypothetical protein, conserved                          | -0,4051 | 0,03928    |
| TcCLB.511327.20  | hypothetical protein (fragment)                          | -0,4051 | 0,04168    |
| TcCLB.510351.80  | hypothetical protein, conserved                          | -0,4053 | 0,02693    |
| TcCLB.508909.50  | hypothetical protein, conserved                          | -0,4053 | 0,04921    |
| TcCLB.510311.60  | hypothetical protein, conserved                          | -0,4054 | 1,333E-06  |
| TcCLB.506691.50  | hypothetical protein, conserved                          | -0,4054 | 0,002294   |
| TcCLB.507815.20  | trans-sialidase (pseudogene), putative                   | -0,4054 | 0,06524    |
| TcCLB.507239.10  | hypothetical protein, conserved                          | -0,4054 | 0,07917    |
| TcCLB.508641.184 | Protein translation factor SUI1 homolog, putative        | -0,4056 | 0,01347    |
| TcCLB.506947.70  | hypothetical protein, conserved                          | -0,4059 | 0,06327    |
| TcCLB.504155.170 | mucin TcMUCII, putative                                  | -0,4059 | 0,481      |
| TcCLB.506367.89  | hypothetical protein, conserved                          | -0,406  | 0,02649    |
| TcCLB.510243.20  | hypothetical protein, conserved                          | -0,4061 | 0,003179   |
| TcCLB.506679.210 | RNA editing complex protein MP61, putative               | -0,4063 | 0,00152    |
| TcCLB.503399.20  | hydrolase, alpha/beta fold family, putative              | -0,4064 | 0,007601   |
| TcCLB.507945.20  | hypothetical protein, conserved                          | -0,4064 | 0,01627    |
| TcCLB.510053.50  | vesicle transport v-SNARE protein, putative              | -0,4064 | 0,03789    |
| TcCLB.504009.4   | hypothetical protein, conserved                          | -0,4065 | 0,04299    |
| TcCLB.507711.280 | hypothetical protein, conserved                          | -0,4066 | 0,007459   |
| TcCLB.504013.50  | selenocysteine-tRNA-specific elongation factor, putative | -0,4067 | 0,0005838  |
| TcCLB.511423.104 | DNA-directed RNA polymerase 2, RPB12 subunit, putative   | -0,4068 | 0,02506    |
| TcCLB.509011.30  | hypothetical protein                                     | -0,4069 | 0,01549    |
| TcCLB.510819.40  | hypothetical protein, conserved                          | -0,4071 | 0,0169     |
| TcCLB.508999.10  | DnaJ chaperone protein, putative                         | -0,4072 | 0,0001814  |
| TcCLB.510763.70  | hypothetical protein, conserved                          | -0,4072 | 0,002203   |
| TcCLB.506859.100 | hypothetical protein, conserved                          | -0,4072 | 0,1335     |



|                  |                                                        |         |            |
|------------------|--------------------------------------------------------|---------|------------|
| TcCLB.509835.30  | hypothetical protein, conserved                        | -0,4073 | 0,008101   |
| TcCLB.504091.10  | hypothetical protein, conserved                        | -0,4074 | 0,0002299  |
| TcCLB.506759.230 | hypothetical protein                                   | -0,4074 | 0,6421     |
| TcCLB.508851.170 | DNA topoisomerase III, putative                        | -0,4075 | 0,0004065  |
| TcCLB.507715.80  | ubiquitin-conjugating enzyme, putative                 | -0,4075 | 0,005655   |
| TcCLB.506529.180 | hypothetical protein, conserved                        | -0,4075 | 0,08965    |
| TcCLB.506297.20  | hypothetical protein                                   | -0,4077 | 0,00002105 |
| TcCLB.504021.140 | hypothetical protein, conserved                        | -0,4078 | 0,0002524  |
| TcCLB.436083.9   | hypothetical protein, conserved                        | -0,4078 | 0,007245   |
| TcCLB.508879.200 | hypothetical protein, conserved                        | -0,4078 | 0,01237    |
| TcCLB.507625.84  | hypothetical protein, conserved                        | -0,4078 | 0,02845    |
| TcCLB.507197.10  | surface protease GP63, putative                        | -0,4079 | 0,00004221 |
| TcCLB.508199.50  | palmitoyl acyltransferase 1, putative                  | -0,4081 | 0,00003099 |
| TcCLB.510045.30  | protein kinase, putative                               | -0,4082 | 0,002834   |
| TcCLB.506495.20  | helicase-like protein, putative                        | -0,4083 | 0,0001064  |
| TcCLB.503879.10  | DNA polymerase delta subunit 2, putative               | -0,4083 | 0,00114    |
| TcCLB.511367.30  | hypothetical protein                                   | -0,4084 | 0,3324     |
| TcCLB.506925.70  | epsin, putative                                        | -0,4085 | 0,0000013  |
| TcCLB.504243.20  | hypothetical protein, conserved                        | -0,4085 | 0,01164    |
| TcCLB.510533.160 | hypothetical protein, conserved                        | -0,4088 | 0,002618   |
| TcCLB.506993.160 | trans-sialidase (pseudogene), putative                 | -0,4088 | 0,1756     |
| TcCLB.506541.10  | hypothetical protein, conserved (pseudogene)           | -0,4088 | 0,2987     |
| TcCLB.509669.50  | hypothetical protein, conserved                        | -0,4089 | 4,532E-06  |
| TcCLB.508921.30  | Kinesin-13 4, putative (KIN13-4)                       | -0,4089 | 0,03003    |
| TcCLB.504193.41  | N-acetyltransferase complex ARD1 subunit (pseudogene), | -0,4089 | 0,04716    |
| TcCLB.507963.44  | hypothetical protein, conserved                        | -0,409  | 0,005932   |
| TcCLB.506753.60  | GDP-mannose transporter, putative                      | -0,4093 | 0,02776    |
| TcCLB.511057.15  | hypothetical protein                                   | -0,4094 | 0,3278     |
| TcCLB.511021.40  | hypothetical protein, conserved                        | -0,4095 | 0,00164    |
| TcCLB.506351.40  | ribonuclease H1, putative                              | -0,4095 | 0,02       |
| TcCLB.511403.15  | mucin TcMUC (pseudogene), putative                     | -0,4095 | 0,5796     |
| TcCLB.505115.10  | hypothetical protein, conserved                        | -0,4096 | 0,0001941  |
| TcCLB.507801.60  | hypothetical protein, conserved                        | -0,4096 | 0,0003298  |
| TcCLB.509893.10  | hypothetical protein                                   | -0,4096 | 0,0009305  |
| TcCLB.504123.10  | hypothetical protein, conserved                        | -0,4096 | 0,003549   |
| TcCLB.503865.30  | hypothetical protein, conserved                        | -0,4097 | 0,0008977  |
| TcCLB.506657.30  | hypothetical protein, conserved                        | -0,4099 | 6,121E-06  |
| TcCLB.510719.240 | hypothetical protein, conserved                        | -0,4099 | 0,01387    |
| TcCLB.506491.10  | casein kinase I, putative                              | -0,4101 | 0,1788     |
| TcCLB.506813.140 | trans-sialidase, Group VII, putative                   | -0,4103 | 0,259      |
| TcCLB.504155.200 | syntaxin binding protein (pseudogene), putative        | -0,4103 | 0,5166     |
| TcCLB.509805.130 | prolyl-tRNA synthetase, putative                       | -0,4104 | 3,585E-07  |
| TcCLB.506501.120 | mucin TcMUCII, putative                                | -0,4105 | 0,4762     |
| TcCLB.511861.111 | elongation factor 1-gamma (EF-1-gamma), putative       | -0,4105 | 0,4804     |
| TcCLB.508693.160 | hypothetical protein, conserved                        | -0,4106 | 0,0008477  |

|                  |                                                            |         |            |
|------------------|------------------------------------------------------------|---------|------------|
| TcCLB.508995.40  | vesicular-fusion protein nsf, putative                     | -0,4107 | 0,001811   |
| TcCLB.463359.9   | vacuolar assembly protein vps41, putative                  | -0,4107 | 0,0186     |
| TcCLB.511717.160 | hypothetical protein                                       | -0,4109 | 0,01606    |
| TcCLB.506717.80  | trans-sialidase, Group VIII, putative                      | -0,4109 | 0,04772    |
| TcCLB.504047.34  | acylphosphatase, putative                                  | -0,411  | 0,04053    |
| TcCLB.510055.150 | hypothetical protein, conserved                            | -0,4111 | 4,945E-07  |
| TcCLB.507257.70  | protein farnesyltransferase alpha subunit, putative        | -0,4111 | 0,0002416  |
| TcCLB.504121.20  | hypothetical protein, conserved                            | -0,4111 | 0,005346   |
| TcCLB.506935.10  | hypothetical protein, conserved                            | -0,4112 | 0,0004274  |
| TcCLB.506147.40  | hypothetical protein                                       | -0,4112 | 0,002082   |
| TcCLB.505999.170 | hypothetical protein, conserved                            | -0,4113 | 2,208E-07  |
| TcCLB.506989.260 | hypothetical protein, conserved (pseudogene)               | -0,4113 | 0,01546    |
| TcCLB.511797.54  | dispersed gene family protein 1 (DGF-1), putative          | -0,4113 | 0,158      |
| TcCLB.508465.10  | aminotransferase, putative                                 | -0,4114 | 0,005389   |
| TcCLB.508523.50  | trans-sialidase, Group II, putative                        | -0,4115 | 0,05187    |
| TcCLB.508693.30  | hypothetical protein, conserved                            | -0,4117 | 0,00007215 |
| TcCLB.506561.10  | helicase-like protein, putative                            | -0,4118 | 0,0002011  |
| TcCLB.508909.70  | hypothetical protein, conserved                            | -0,4118 | 0,03219    |
| TcCLB.457251.19  | hypothetical protein, conserved (fragment)                 | -0,4118 | 0,05529    |
| TcCLB.508057.41  | trans-sialidase (pseudogene), putative                     | -0,4118 | 0,2692     |
| TcCLB.510973.20  | hypothetical protein, conserved                            | -0,4123 | 0,0002141  |
| TcCLB.509669.110 | GTPase activator protein, putative                         | -0,4123 | 0,0009102  |
| TcCLB.511293.40  | U3 snoRNA-associated protein UTP11, putative               | -0,4124 | 0,002175   |
| TcCLB.507949.60  | hypothetical protein, conserved                            | -0,4124 | 0,002892   |
| TcCLB.508323.60  | centrin-4, putative (Centrin4)                             | -0,4125 | 0,00002346 |
| TcCLB.510431.40  | metallo- peptidase, Clan M- Family M48 (FACE1)             | -0,4125 | 0,0004274  |
| TcCLB.505999.110 | NADH-ubiquinone oxidoreductase complex I subunit, putative | -0,4125 | 0,002623   |
| TcCLB.511771.210 | dispersed gene family protein 1 (DGF-1), putative          | -0,4125 | 0,0146     |
| TcCLB.509695.110 | hypothetical protein, conserved                            | -0,4127 | 0,0007066  |
| TcCLB.511407.80  | hypothetical protein, conserved                            | -0,413  | 0,08953    |
| TcCLB.511543.50  | hypothetical protein, conserved                            | -0,4131 | 0,01463    |
| TcCLB.504115.60  | trans-sialidase, Group V, putative                         | -0,4131 | 0,09559    |
| TcCLB.511721.20  | hypothetical protein, conserved                            | -0,4131 | 0,3649     |
| TcCLB.507841.40  | hypothetical protein, conserved                            | -0,4132 | 0,0005768  |
| TcCLB.509965.229 | heat shock protein (pseudogene), putative                  | -0,4132 | 0,02046    |
| TcCLB.506247.160 | hypothetical protein, conserved                            | -0,4133 | 0,00003476 |
| TcCLB.511543.60  | glutathione peroxidase, putative                           | -0,4133 | 0,01023    |
| TcCLB.511537.21  | hypothetical protein, conserved                            | -0,4133 | 0,02408    |
| TcCLB.511803.10  | cullin 2, putative                                         | -0,4134 | 0,003209   |
| TcCLB.508163.81  | hypothetical protein, conserved (pseudogene)               | -0,4134 | 0,4183     |
| TcCLB.507957.300 | mucin-associated surface protein (MASP), putative          | -0,4136 | 0,3702     |
| TcCLB.507519.130 | Mini-chromosome maintenance complex-binding protein (      | -0,4137 | 0,0007241  |
| TcCLB.507993.310 | transporter, putative                                      | -0,4137 | 0,008113   |
| TcCLB.510377.475 | hypothetical protein, conserved (pseudogene)               | -0,4137 | 0,577      |
| TcCLB.504867.99  | hypothetical protein, conserved                            | -0,4138 | 0,00009937 |

|                  |                                                             |         |            |
|------------------|-------------------------------------------------------------|---------|------------|
| TcCLB.508169.69  | peptidyl-prolyl cis-trans isomerase, putative               | -0,4138 | 0,0007063  |
| TcCLB.508865.10  | glutathione synthetase, putative                            | -0,4138 | 0,001733   |
| TcCLB.507513.30  | hypothetical protein, conserved                             | -0,4139 | 0,09022    |
| TcCLB.507771.90  | hypothetical protein, conserved                             | -0,4141 | 1,754E-06  |
| TcCLB.509105.90  | MRB1-associated protein, putative (RGG2)                    | -0,4141 | 0,003054   |
| TcCLB.511727.260 | cyclin 9, putative (CYC9)                                   | -0,4141 | 0,01569    |
| TcCLB.508257.80  | hypothetical protein, conserved                             | -0,4142 | 2,561E-06  |
| TcCLB.511671.60  | surface antigen 2 (CA-2), putative                          | -0,4142 | 0,00003216 |
| TcCLB.506407.70  | hypothetical protein, conserved                             | -0,4142 | 0,004978   |
| TcCLB.508505.20  | hypothetical protein, conserved                             | -0,4143 | 0,0003482  |
| TcCLB.509119.10  | oligomeric golgi complex component 8, putative              | -0,4143 | 0,00242    |
| TcCLB.507065.29  | mucin-associated surface protein (MASP, pseudogene), pu     | -0,4147 | 0,283      |
| TcCLB.508831.150 | hypothetical protein, conserved                             | -0,4149 | 0,00001163 |
| TcCLB.424123.30  | hypothetical protein, conserved                             | -0,4149 | 0,0053     |
| TcCLB.511003.30  | mitochondrial RNA binding complex 1 subunit, putative (RI   | -0,4152 | 2,093E-07  |
| TcCLB.511909.20  | expression site-associated gene (ESAG-like) protein, putati | -0,4152 | 0,004077   |
| TcCLB.507547.70  | hypothetical protein, conserved                             | -0,4153 | 0,00005201 |
| TcCLB.503721.30  | hypothetical protein, conserved                             | -0,4154 | 0,00002764 |
| TcCLB.511339.30  | UDP-Gal or UDP-GlcNAc-dependent glycosyltransferase, pu     | -0,4154 | 0,1451     |
| TcCLB.510361.10  | trans-sialidase, Group V, putative                          | -0,4154 | 0,2799     |
| TcCLB.503583.90  | hydrogenase, putative                                       | -0,4155 | 0,001376   |
| TcCLB.506127.80  | molybdopterin synthase sulphurylase-like protein, putative  | -0,4157 | 0,000352   |
| TcCLB.508989.60  | hypothetical protein, conserved                             | -0,4157 | 0,08481    |
| TcCLB.508821.20  | hypothetical protein, conserved                             | -0,4158 | 0,0001758  |
| TcCLB.506407.30  | hypothetical protein, conserved                             | -0,4158 | 0,0005658  |
| TcCLB.506543.70  | hypothetical protein, conserved                             | -0,4158 | 0,01585    |
| TcCLB.510187.74  | short-chain dehydrogenase, putative                         | -0,4159 | 0,005112   |
| TcCLB.506519.90  | hypothetical protein, conserved                             | -0,4159 | 0,009326   |
| TcCLB.511183.80  | mucin-associated surface protein (MASP), putative           | -0,4159 | 0,309      |
| TcCLB.511583.20  | hypothetical protein, conserved                             | -0,416  | 0,002264   |
| TcCLB.508319.40  | ATP-dependent RNA helicase SUB2, putative (SUB2)            | -0,4161 | 2,089E-07  |
| TcCLB.506337.130 | hypothetical protein, conserved                             | -0,4161 | 0,004504   |
| TcCLB.504047.50  | hypothetical protein, conserved                             | -0,4162 | 6,368E-06  |
| TcCLB.506247.130 | hypothetical protein, conserved                             | -0,4163 | 0,00003358 |
| TcCLB.509525.94  | mucin-associated surface protein (MASP, pseudogene), pu     | -0,4163 | 0,1192     |
| TcCLB.511145.70  | centromere/microtubule binding protein cbf5, putative       | -0,4164 | 0,00001442 |
| TcCLB.511269.30  | hypothetical protein, conserved                             | -0,4164 | 0,01323    |
| TcCLB.511797.200 | mucin-associated surface protein (MASP), putative           | -0,4164 | 0,02752    |
| TcCLB.508307.90  | hypothetical protein, conserved                             | -0,4165 | 0,00003285 |
| TcCLB.506303.10  | hypothetical protein, conserved                             | -0,4166 | 0,00001221 |
| TcCLB.505077.9   | dispersed gene family protein 1 (DGF-1), putative (fragme   | -0,4166 | 0,1846     |
| TcCLB.511183.140 | dispersed gene family protein 1 (DGF-1), putative           | -0,4166 | 0,2133     |
| TcCLB.506411.20  | hypothetical protein, conserved                             | -0,4167 | 0,001812   |
| TcCLB.506847.70  | hypothetical protein, conserved                             | -0,4167 | 0,01759    |
| TcCLB.507729.10  | dispersed gene family protein 1 (DGF-1), putative           | -0,4168 | 0,3525     |

|                  |                                                           |         |            |
|------------------|-----------------------------------------------------------|---------|------------|
| TcCLB.505009.20  | divalent cation tolerance protein, putative               | -0,4169 | 0,2431     |
| TcCLB.506885.70  | polyadenylate-binding protein 1, putative                 | -0,417  | 0,00007218 |
| TcCLB.511537.24  | hypothetical protein, conserved                           | -0,4171 | 0,001045   |
| TcCLB.510001.40  | hypothetical protein, conserved                           | -0,4171 | 0,001487   |
| TcCLB.506419.40  | hypothetical protein, conserved                           | -0,4172 | 7,225E-06  |
| TcCLB.510329.230 | hypothetical protein, conserved                           | -0,4172 | 0,002454   |
| TcCLB.484299.4   | ATP-dependent DEAD/H RNA helicase, putative               | -0,4174 | 0,1502     |
| TcCLB.506625.210 | hypothetical protein, conserved                           | -0,4177 | 0,001613   |
| TcCLB.510889.240 | hypothetical protein, conserved                           | -0,4177 | 0,0211     |
| TcCLB.506753.230 | hypothetical protein, conserved                           | -0,4178 | 0,0004038  |
| TcCLB.508461.110 | hypothetical protein, conserved                           | -0,4178 | 0,0008811  |
| TcCLB.506251.110 | hypothetical protein, conserved                           | -0,4178 | 0,002694   |
| TcCLB.508815.60  | hypothetical protein, conserved                           | -0,4178 | 0,008572   |
| TcCLB.472833.10  | hypothetical protein, conserved                           | -0,4183 | 0,3532     |
| TcCLB.508161.30  | mucin-associated surface protein (MASP), putative         | -0,4184 | 0,1234     |
| TcCLB.508857.150 | hypothetical protein, conserved                           | -0,4185 | 0,00412    |
| TcCLB.511857.40  | N(2), N(2)-dimethylguanosine tRNA methyltransferase, pu   | -0,4187 | 0,0003542  |
| TcCLB.503809.90  | glycerol uptake protein, putative                         | -0,4187 | 0,001134   |
| TcCLB.509023.120 | ubiquitin carboxyl-terminal hydrolase, putative           | -0,4188 | 0,00005361 |
| TcCLB.509899.70  | hypothetical protein, conserved (pseudogene)              | -0,4188 | 0,00008204 |
| TcCLB.510329.50  | hypothetical protein                                      | -0,419  | 0,00001069 |
| TcCLB.511277.580 | RNA-binding protein 29, putative (RBP29)                  | -0,4191 | 4,227E-06  |
| TcCLB.508409.260 | hypothetical protein, conserved                           | -0,4191 | 0,0000192  |
| TcCLB.410923.30  | hypothetical protein                                      | -0,4191 | 0,1649     |
| TcCLB.503453.90  | hypothetical protein, conserved                           | -0,4192 | 0,0001927  |
| TcCLB.511209.50  | hypothetical protein, conserved                           | -0,4192 | 0,00122    |
| TcCLB.509937.39  | hypothetical protein, conserved                           | -0,4194 | 0,007768   |
| TcCLB.510653.10  | hypothetical protein, conserved                           | -0,4194 | 0,05073    |
| TcCLB.504155.160 | mucin-associated surface protein (MASP), putative         | -0,4194 | 0,2078     |
| TcCLB.506811.210 | cell division cycle protein 45 (CDC45), putative          | -0,4195 | 0,0006763  |
| TcCLB.510421.70  | hypothetical protein, conserved                           | -0,4195 | 0,003575   |
| TcCLB.507001.10  | hypothetical protein, conserved                           | -0,4196 | 0,00005321 |
| TcCLB.413293.30  | retrotransposon hot spot protein (RHS, pseudogene), putat | -0,4196 | 0,001632   |
| TcCLB.504005.50  | hypothetical protein, conserved                           | -0,4197 | 0,001562   |
| TcCLB.511003.90  | hypothetical protein, conserved                           | -0,4198 | 0,0007326  |
| TcCLB.511151.20  | hypothetical protein, conserved                           | -0,4199 | 0,00007768 |
| TcCLB.506221.50  | coatomer subunit epsilon (COPE)                           | -0,4199 | 0,001781   |
| TcCLB.511737.20  | hypothetical protein, conserved                           | -0,42   | 0,00006957 |
| TcCLB.509603.10  | vacuolar protein sorting 18, putative                     | -0,42   | 0,01665    |
| TcCLB.507543.10  | dispersed gene family protein 1 (DGF-1), putative         | -0,4201 | 0,3949     |
| TcCLB.508479.190 | peroxisome assembly protein, putative                     | -0,4202 | 0,0003329  |
| TcCLB.506067.70  | mucin-associated surface protein (MASP), putative         | -0,4202 | 0,4508     |
| TcCLB.503887.50  | hypothetical protein, conserved                           | -0,4204 | 0,001177   |
| TcCLB.507943.20  | histone H4, putative                                      | -0,4207 | 0,0000026  |
| TcCLB.508799.80  | mRNA cap guanine-N7 methyltransferase, putative           | -0,4207 | 0,0003552  |

|                  |                                                                |         |            |
|------------------|----------------------------------------------------------------|---------|------------|
| TcCLB.509077.20  | trans-sialidase (pseudogene), putative                         | -0,4207 | 0,3238     |
| TcCLB.506679.30  | hypothetical protein, conserved                                | -0,4208 | 1,975E-06  |
| TcCLB.511491.50  | KU80 protein, putative                                         | -0,421  | 0,0002942  |
| TcCLB.506727.70  | hypothetical protein, conserved                                | -0,421  | 0,001337   |
| TcCLB.506967.13  | hypothetical protein, conserved                                | -0,421  | 0,072      |
| TcCLB.507025.20  | hypothetical protein, conserved                                | -0,4214 | 0,002573   |
| TcCLB.511285.4   | intraflagellar transport protein 140, putative (fragment) (II) | -0,4215 | 0,0007799  |
| TcCLB.509575.30  | hypothetical protein, conserved                                | -0,4215 | 0,0009292  |
| TcCLB.508299.89  | hypothetical protein, conserved                                | -0,4215 | 0,02952    |
| TcCLB.511143.30  | hypothetical protein, conserved                                | -0,4216 | 0,003567   |
| TcCLB.504079.20  | hypothetical protein, conserved                                | -0,4217 | 0,06246    |
| TcCLB.510731.68  | hypothetical protein, conserved                                | -0,4218 | 0,02825    |
| TcCLB.504097.10  | RNA editing complex protein MP61, putative                     | -0,422  | 0,0006422  |
| TcCLB.508871.180 | hypothetical protein                                           | -0,422  | 0,2718     |
| TcCLB.509005.50  | hypothetical protein, conserved                                | -0,4223 | 0,00003249 |
| TcCLB.506257.60  | XPA-interacting protein, putative                              | -0,4223 | 0,002866   |
| TcCLB.509267.40  | hypothetical protein, conserved                                | -0,4226 | 0,0002482  |
| TcCLB.503753.10  | hypothetical protein, conserved                                | -0,4226 | 0,007669   |
| TcCLB.506389.70  | translation-associated element 2, putative                     | -0,4228 | 0,00004537 |
| TcCLB.511743.30  | hypothetical protein, conserved                                | -0,4229 | 0,0005221  |
| TcCLB.509561.80  | plectin-like protein, putative                                 | -0,4229 | 0,001296   |
| TcCLB.510999.30  | hypothetical protein, conserved                                | -0,423  | 0,001096   |
| TcCLB.510777.10  | hypothetical protein, conserved                                | -0,423  | 0,01413    |
| TcCLB.503673.18  | hypothetical protein, conserved                                | -0,4234 | 0,009499   |
| TcCLB.507621.5   | trans-sialidase (pseudogene), putative                         | -0,4234 | 0,2254     |
| TcCLB.508457.20  | hypothetical protein, conserved                                | -0,4235 | 9,269E-06  |
| TcCLB.504071.20  | hypothetical protein, conserved                                | -0,4235 | 0,0001915  |
| TcCLB.506729.40  | hypothetical protein, conserved                                | -0,4238 | 0,0002782  |
| TcCLB.511861.20  | trans-sialidase, Group V, putative                             | -0,4238 | 0,02499    |
| TcCLB.507485.110 | hypothetical protein, conserved                                | -0,4239 | 0,00002206 |
| TcCLB.506855.300 | hypothetical protein, conserved                                | -0,4239 | 0,0002134  |
| TcCLB.511181.70  | hypothetical protein, conserved                                | -0,4239 | 0,01682    |
| TcCLB.510121.30  | actin-like protein, putative                                   | -0,4239 | 0,01794    |
| TcCLB.506139.170 | trans-sialidase (pseudogene), putative                         | -0,4239 | 0,2104     |
| TcCLB.506975.20  | hypothetical protein, conserved                                | -0,4241 | 0,004011   |
| TcCLB.507007.45  | anaphase promoting complex subunit protein, putative           | -0,4241 | 0,2139     |
| TcCLB.506247.240 | hypothetical protein, conserved                                | -0,4242 | 0,002175   |
| TcCLB.510253.29  | hypothetical protein, conserved (fragment)                     | -0,4243 | 0,07706    |
| TcCLB.505025.150 | trans-sialidase (pseudogene), putative                         | -0,4243 | 0,2194     |
| TcCLB.506211.114 | C-terminal motor kinesin, putative                             | -0,4247 | 5,688E-08  |
| TcCLB.509747.110 | hypothetical protein, conserved                                | -0,4247 | 0,0008258  |
| TcCLB.508717.50  | hypothetical protein, conserved                                | -0,4247 | 0,003227   |
| TcCLB.506577.150 | hypothetical protein, conserved                                | -0,4248 | 3,88E-08   |
| TcCLB.506629.90  | hypothetical protein, conserved                                | -0,4248 | 0,09741    |
| TcCLB.511083.39  | mucin-associated surface protein (MASP), putative              | -0,4248 | 0,1974     |

|                  |                                                               |         |            |
|------------------|---------------------------------------------------------------|---------|------------|
| TcCLB.509053.80  | hypothetical protein, conserved                               | -0,4249 | 0,01051    |
| TcCLB.510285.40  | hypothetical protein, conserved                               | -0,425  | 0,01361    |
| TcCLB.505997.65  | trans-sialidase (pseudogene), putative                        | -0,4251 | 0,06033    |
| TcCLB.504109.110 | cleavage and polyadenylation specificity factor, putative     | -0,4252 | 0,00009937 |
| TcCLB.506695.49  | hypothetical protein, conserved                               | -0,4254 | 0,00001316 |
| TcCLB.511003.50  | hypothetical protein, conserved                               | -0,4254 | 0,00003304 |
| TcCLB.509791.160 | hypothetical protein, conserved                               | -0,4256 | 5,111E-07  |
| TcCLB.506339.25  | hypothetical protein, conserved (pseudogene)                  | -0,4256 | 0,0582     |
| TcCLB.509757.10  | hypothetical protein, conserved                               | -0,4257 | 0,001952   |
| TcCLB.507993.33  | hypothetical protein, conserved                               | -0,4257 | 0,01523    |
| TcCLB.503499.30  | mitochondrial carrier protein (pseudogene), putative          | -0,4258 | 0,02348    |
| TcCLB.506745.4   | hypothetical protein, conserved (fragment)                    | -0,4258 | 0,2941     |
| TcCLB.510329.40  | hypothetical protein, conserved                               | -0,4259 | 0,00004673 |
| TcCLB.511801.4   | hypothetical protein, conserved                               | -0,4259 | 0,001558   |
| TcCLB.510015.5   | hypothetical protein, conserved (pseudogene)                  | -0,4259 | 0,3468     |
| TcCLB.510391.40  | mucin TcMUCII, putative                                       | -0,4261 | 0,3635     |
| TcCLB.510317.20  | hypothetical protein, conserved                               | -0,4262 | 0,00006602 |
| TcCLB.506741.130 | trans-sialidase, Group V, putative                            | -0,4262 | 0,2781     |
| TcCLB.503897.20  | hypothetical protein, conserved                               | -0,4264 | 0,0001258  |
| TcCLB.510781.30  | tryptophanyl-tRNA synthetase (pseudogene), putative           | -0,4264 | 0,4275     |
| TcCLB.506407.90  | hypothetical protein, conserved                               | -0,4267 | 1,974E-08  |
| TcCLB.510889.320 | hypothetical protein, conserved                               | -0,4267 | 0,0001088  |
| TcCLB.508305.40  | trans-sialidase, Group V, putative                            | -0,4268 | 0,1813     |
| TcCLB.509105.100 | Enriched in surface-labeled proteome protein 15 (ESP15)       | -0,427  | 0,0005516  |
| TcCLB.506737.60  | hypothetical protein, conserved                               | -0,427  | 0,06796    |
| TcCLB.508819.20  | hypothetical protein, conserved                               | -0,4272 | 0,000377   |
| TcCLB.421173.4   | trans-sialidase, putative (fragment)                          | -0,4272 | 0,07595    |
| TcCLB.506457.120 | hypothetical protein, conserved                               | -0,4274 | 0,000493   |
| TcCLB.510091.70  | U6 snRNA-associated Sm-like protein LSm8, putative            | -0,4274 | 0,02916    |
| TcCLB.508231.200 | 40S ribosomal protein S8, putative                            | -0,4275 | 0,0006014  |
| TcCLB.507831.80  | hypothetical protein, conserved                               | -0,4276 | 0,001447   |
| TcCLB.504839.28  | tryparedoxin peroxidase, putative                             | -0,4277 | 3,066E-07  |
| TcCLB.508059.50  | hypothetical protein, conserved                               | -0,4277 | 5,335E-06  |
| TcCLB.504867.60  | hypothetical protein, conserved                               | -0,4277 | 0,0001273  |
| TcCLB.504157.60  | hypothetical protein, conserved                               | -0,4279 | 0,01926    |
| TcCLB.506945.250 | hypothetical protein, conserved                               | -0,428  | 8,804E-06  |
| TcCLB.510187.60  | glyceraldehyde 3-phosphate dehydrogenase, cytosolic, putative | -0,428  | 0,001489   |
| TcCLB.506771.18  | hypothetical protein, conserved                               | -0,428  | 0,002112   |
| TcCLB.508139.240 | trans-sialidase, Group II, putative                           | -0,428  | 0,004149   |
| TcCLB.509167.120 | S-adenosylmethionine decarboxylase proenzyme, putative        | -0,4281 | 0,00007001 |
| TcCLB.511725.140 | mitochondrial carrier protein, putative                       | -0,4283 | 0,0009811  |
| TcCLB.398235.10  | protein kinase, putative (fragment)                           | -0,4283 | 0,09037    |
| TcCLB.440099.19  | hypothetical protein, conserved                               | -0,4284 | 0,004306   |
| TcCLB.506269.99  | mucin-associated surface protein (MASP), putative (fragment)  | -0,4284 | 0,01462    |
| TcCLB.508365.280 | mucin TcMUCII, putative                                       | -0,4284 | 0,3469     |

|                  |                                                           |         |            |
|------------------|-----------------------------------------------------------|---------|------------|
| TcCLB.509569.30  | hypothetical protein, conserved                           | -0,4285 | 0,0002754  |
| TcCLB.503543.4   | hypothetical protein, conserved (fragment)                | -0,4285 | 0,06062    |
| TcCLB.508409.300 | hypothetical protein, conserved                           | -0,4286 | 0,005996   |
| TcCLB.507711.120 | hypothetical protein, conserved                           | -0,4286 | 0,007397   |
| TcCLB.506405.110 | ribosomal protein L13, putative                           | -0,4286 | 0,03621    |
| TcCLB.511165.50  | Enriched in surface-labeled proteome protein 7 (ESP7)     | -0,4288 | 0,008786   |
| TcCLB.506215.10  | hypothetical protein                                      | -0,4288 | 0,1389     |
| TcCLB.508461.530 | hypothetical protein, conserved                           | -0,4289 | 0,0001594  |
| TcCLB.509181.9   | dispersed gene family protein 1 (DGF-1), putative         | -0,4289 | 0,3107     |
| TcCLB.503423.30  | hypothetical protein, conserved                           | -0,429  | 0,1557     |
| TcCLB.508461.380 | calmodulin, putative                                      | -0,4292 | 4,915E-07  |
| TcCLB.504827.110 | hypothetical protein, conserved                           | -0,4292 | 0,00002436 |
| TcCLB.508175.114 | hypothetical protein, conserved                           | -0,4292 | 0,0001617  |
| TcCLB.508461.120 | hypothetical protein, conserved                           | -0,4295 | 8,43E-07   |
| TcCLB.511313.20  | hypothetical protein, conserved                           | -0,4295 | 0,002564   |
| TcCLB.506559.200 | thioredoxin, putative                                     | -0,4296 | 1,458E-07  |
| TcCLB.506249.10  | hypothetical protein, conserved                           | -0,4296 | 0,02156    |
| TcCLB.511255.580 | mucin-associated surface protein (MASP, pseudogene), pu   | -0,4296 | 0,3908     |
| TcCLB.511589.130 | 14-3-3 protein 1, putative (14-3-3-I)                     | -0,4297 | 1,277E-06  |
| TcCLB.508299.30  | hypothetical protein                                      | -0,4298 | 3,202E-06  |
| TcCLB.506211.120 | hypothetical protein, conserved                           | -0,4299 | 0,0009696  |
| TcCLB.511765.55  | trans-sialidase (pseudogene), putative                    | -0,43   | 0,3497     |
| TcCLB.510055.80  | hypothetical protein                                      | -0,4301 | 0,002468   |
| TcCLB.506993.180 | mucin-associated surface protein (MASP), putative         | -0,4301 | 0,2244     |
| TcCLB.506809.5   | retrotransposon hot spot (RHS) protein, putative          | -0,4301 | 0,271      |
| TcCLB.503999.20  | Kinesin-13 5, putative (KIN13-5)                          | -0,4302 | 0,0000147  |
| TcCLB.509595.50  | DIS3-like exonuclease, putative                           | -0,4303 | 0,00001856 |
| TcCLB.506755.170 | hypothetical protein, conserved                           | -0,4303 | 0,00004936 |
| TcCLB.510167.20  | hypothetical protein, conserved                           | -0,4304 | 0,02082    |
| TcCLB.511897.28  | hypothetical protein, conserved                           | -0,4306 | 0,009934   |
| TcCLB.506195.220 | hypothetical protein, conserved                           | -0,4306 | 0,0108     |
| TcCLB.506721.10  | hypothetical protein, conserved (fragment)                | -0,4306 | 0,1096     |
| TcCLB.508859.10  | hypothetical protein, conserved                           | -0,4307 | 0,003561   |
| TcCLB.510541.9   | dispersed gene family protein 1 (DGF-1), putative         | -0,431  | 0,3946     |
| TcCLB.506331.20  | retrotransposon hot spot protein (RHS, pseudogene), putat | -0,4311 | 0,07786    |
| TcCLB.506357.80  | hypothetical protein, conserved                           | -0,4312 | 2,651E-06  |
| TcCLB.437545.10  | 3-oxo-5-alpha-steroid 4-dehydrogenase, putative           | -0,4312 | 0,0004353  |
| TcCLB.508871.140 | mucin TcMUCII, putative                                   | -0,4312 | 0,3642     |
| TcCLB.503809.30  | RNA-binding protein, putative                             | -0,4314 | 0,01193    |
| TcCLB.509721.30  | intraflagellar transport protein 122B, putative (IFT122B) | -0,4315 | 7,494E-06  |
| TcCLB.430603.10  | mucin-associated surface protein (MASP, pseudogene), pu   | -0,4315 | 0,2467     |
| TcCLB.509695.200 | T-complex protein 1, delta subunit, putative              | -0,4316 | 1,39E-08   |
| TcCLB.508153.380 | RNA polymerase-associated protein CTR9, putative          | -0,4316 | 2,398E-06  |
| TcCLB.507511.91  | mucin TcMUCIII, putative                                  | -0,4317 | 0,002383   |
| TcCLB.508441.60  | hypothetical protein, conserved                           | -0,4318 | 0,0006048  |

|                  |                                                          |         |            |
|------------------|----------------------------------------------------------|---------|------------|
| TcCLB.510441.20  | dispersed gene family protein 1 (DGF-1), putative        | -0,4318 | 0,04691    |
| TcCLB.509637.18  | hypothetical protein, conserved                          | -0,432  | 0,00604    |
| TcCLB.510359.250 | hypothetical protein, conserved                          | -0,432  | 0,1364     |
| TcCLB.509265.36  | ATP-dependent DEAD/H RNA helicase (pseudogene), putative | -0,432  | 0,2073     |
| TcCLB.511239.60  | hypothetical protein, conserved                          | -0,4321 | 5,541E-06  |
| TcCLB.511367.350 | hypothetical protein, conserved                          | -0,4322 | 0,0002831  |
| TcCLB.510359.150 | ATP-dependent helicase, putative                         | -0,4323 | 0,00001118 |
| TcCLB.509445.20  | hypothetical protein, conserved                          | -0,4323 | 0,0000266  |
| TcCLB.507715.20  | hypothetical protein, conserved                          | -0,4323 | 0,0004345  |
| TcCLB.506287.30  | hypothetical protein, conserved                          | -0,4324 | 0,01546    |
| TcCLB.508347.90  | hypothetical protein, conserved                          | -0,4325 | 2,014E-06  |
| TcCLB.508799.180 | hypothetical protein, conserved                          | -0,4325 | 0,0001115  |
| TcCLB.510029.30  | hypothetical protein, conserved                          | -0,4325 | 0,0002717  |
| TcCLB.506249.50  | hypothetical protein, conserved                          | -0,4325 | 0,03223    |
| TcCLB.504147.60  | chaperone DNAJ protein, putative                         | -0,4326 | 1,198E-06  |
| TcCLB.507787.90  | chaperone DNAJ protein, putative                         | -0,4327 | 1,164E-06  |
| TcCLB.508277.370 | mitochondrial DNA topoisomerase II, putative             | -0,4329 | 8,666E-09  |
| TcCLB.509609.10  | hypothetical protein, conserved                          | -0,4329 | 0,005562   |
| TcCLB.504507.20  | DNA replication licensing factor MCM8, putative          | -0,4329 | 0,06607    |
| TcCLB.511555.60  | ubiquitin ligase, putative                               | -0,433  | 1,63E-11   |
| TcCLB.509669.150 | hypothetical protein, conserved                          | -0,4331 | 0,001129   |
| TcCLB.510599.40  | hypothetical protein, conserved                          | -0,4335 | 0,00001329 |
| TcCLB.506319.40  | hypothetical protein                                     | -0,4339 | 0,2119     |
| TcCLB.508295.50  | mucin TcMUCII, putative                                  | -0,4339 | 0,2682     |
| TcCLB.506135.50  | hypothetical protein, conserved                          | -0,434  | 0,0006036  |
| TcCLB.508699.90  | surface protease GP63, putative                          | -0,4343 | 0,02741    |
| TcCLB.510575.120 | hypothetical protein, conserved                          | -0,4344 | 0,007856   |
| TcCLB.510825.20  | hypothetical protein, conserved                          | -0,4344 | 0,07161    |
| TcCLB.506239.30  | lectin, putative (AG38)                                  | -0,4345 | 1,112E-06  |
| TcCLB.504137.110 | hypothetical protein, conserved                          | -0,4345 | 7,911E-06  |
| TcCLB.507007.37  | hypothetical protein, conserved                          | -0,4346 | 0,3932     |
| TcCLB.508641.120 | hypothetical protein, conserved                          | -0,4349 | 0,00275    |
| TcCLB.507007.90  | hypothetical protein, conserved                          | -0,4349 | 0,01017    |
| TcCLB.506621.14  | ubiquitin ligase, putative                               | -0,435  | 0,000473   |
| TcCLB.506597.51  | hypothetical protein                                     | -0,435  | 0,547      |
| TcCLB.508707.90  | proteasome regulatory non-ATPase subunit 7, putative     | -0,4351 | 0,00001168 |
| TcCLB.509215.40  | peptidyl-prolyl cis-trans isomerase, putative            | -0,4352 | 2,114E-06  |
| TcCLB.507087.30  | cysteine peptidase, Clan CA, family C19, putative        | -0,4352 | 0,00002007 |
| TcCLB.507031.170 | protein kinase (pseudogene), putative                    | -0,4353 | 0,00003582 |
| TcCLB.506559.310 | hypothetical protein, conserved                          | -0,4353 | 0,0000624  |
| TcCLB.506227.90  | hypothetical protein, conserved                          | -0,4353 | 0,001554   |
| TcCLB.510557.10  | trans-sialidase (pseudogene), putative                   | -0,4354 | 0,01731    |
| TcCLB.506589.100 | hypothetical protein                                     | -0,4357 | 0,3833     |
| TcCLB.506743.170 | hypothetical protein, conserved                          | -0,4358 | 0,001494   |
| TcCLB.507649.80  | nucleolar RNA-binding protein, putative                  | -0,436  | 1,37E-07   |



|                  |                                                            |         |            |
|------------------|------------------------------------------------------------|---------|------------|
| TcCLB.504247.40  | RNA-editing nuclease 1 (KREN1)                             | -0,436  | 0,001899   |
| TcCLB.508331.80  | dispersed gene family protein 1 (DGF-1, pseudogene), puta  | -0,4361 | 0,0539     |
| TcCLB.509525.190 | hypothetical protein                                       | -0,4361 | 0,5365     |
| TcCLB.506295.30  | hypothetical protein, conserved                            | -0,4362 | 0,001593   |
| TcCLB.507485.130 | amastin, putative                                          | -0,4363 | 0,00007061 |
| TcCLB.507485.80  | hypothetical protein, conserved                            | -0,4363 | 0,02038    |
| TcCLB.510143.120 | hypothetical protein, conserved                            | -0,4363 | 0,02187    |
| TcCLB.508153.370 | hypothetical protein, conserved                            | -0,4364 | 0,0000389  |
| TcCLB.503749.20  | hypothetical protein                                       | -0,4364 | 0,0005653  |
| TcCLB.503575.40  | hypothetical protein, conserved                            | -0,4364 | 0,02373    |
| TcCLB.509487.10  | hypothetical protein                                       | -0,4365 | 0,01223    |
| TcCLB.507053.30  | hypothetical protein, conserved                            | -0,4366 | 0,00001841 |
| TcCLB.504037.40  | hypothetical protein, conserved                            | -0,4366 | 0,04395    |
| TcCLB.507061.40  | hypothetical protein, conserved (pseudogene)               | -0,4367 | 0,00001048 |
| TcCLB.506011.30  | hypothetical protein, conserved                            | -0,4367 | 0,06213    |
| TcCLB.511055.60  | hypothetical protein, conserved                            | -0,4368 | 0,1328     |
| TcCLB.510073.30  | pumilio/PUF RNA binding protein 4, putative (PUF4)         | -0,437  | 0,5323     |
| TcCLB.506929.50  | hypothetical protein, conserved                            | -0,4373 | 0,0003333  |
| TcCLB.503821.10  | DNA-directed RNA polymerase I subunit, putative            | -0,4373 | 0,0228     |
| TcCLB.510363.170 | mucin TcMUCII, putative                                    | -0,4373 | 0,6029     |
| TcCLB.506703.100 | mucin TcMUCII (pseudogene), putative                       | -0,4374 | 0,5275     |
| TcCLB.509969.20  | surface protease GP63 (pseudogene), putative               | -0,4375 | 0,2049     |
| TcCLB.507627.9   | kinesin, putative                                          | -0,4376 | 8,711E-06  |
| TcCLB.508837.160 | hypothetical protein, conserved                            | -0,4376 | 0,00009883 |
| TcCLB.511847.20  | hypothetical protein, conserved                            | -0,4376 | 0,000346   |
| TcCLB.509805.30  | hypothetical protein, conserved                            | -0,4376 | 0,009204   |
| TcCLB.505171.70  | ATP-dependent DEAD/H RNA helicase, putative                | -0,4377 | 0,00001549 |
| TcCLB.509443.20  | mitochondrial RNA binding protein 1, putative              | -0,4377 | 0,00003007 |
| TcCLB.508665.30  | hypothetical protein, conserved                            | -0,4377 | 0,00008603 |
| TcCLB.511511.6   | zinc finger protein ZFP1                                   | -0,4379 | 0,3224     |
| TcCLB.510225.30  | hypothetical protein, conserved                            | -0,4383 | 0,000431   |
| TcCLB.511301.60  | hypothetical protein, conserved                            | -0,4383 | 0,0006568  |
| TcCLB.510265.20  | 26S protease regulatory subunit, putative                  | -0,4384 | 0,00000585 |
| TcCLB.504167.14  | hypothetical protein                                       | -0,4384 | 0,005895   |
| TcCLB.503579.40  | hypothetical protein, conserved                            | -0,4384 | 0,006309   |
| TcCLB.504741.60  | transcription initiation protein, putative                 | -0,4386 | 0,00003038 |
| TcCLB.506661.80  | hypothetical protein, conserved                            | -0,4387 | 0,001146   |
| TcCLB.505957.20  | dispersed gene family protein 1 (DGF-1, pseudogene), puta  | -0,4388 | 0,02967    |
| TcCLB.509229.130 | hypothetical protein, conserved                            | -0,4391 | 0,00301    |
| TcCLB.511367.260 | Peptidase C19, ubiquitin carboxyl-terminal hydrolase, puta | -0,4392 | 9,089E-06  |
| TcCLB.510657.100 | hypothetical protein, conserved                            | -0,4393 | 0,00001748 |
| TcCLB.503847.90  | ABC1 protein, putative                                     | -0,4395 | 0,0000767  |
| TcCLB.510197.110 | dispersed gene family protein 1 (DGF-1), putative          | -0,4395 | 0,04013    |
| TcCLB.506583.60  | Elongation factor G1, mitochondrial, putative (EF-G1)      | -0,4396 | 4,874E-08  |
| TcCLB.507527.30  | DNA replication licensing factor MCM6, putative            | -0,4396 | 0,0002108  |

|                   |                                                        |         |            |
|-------------------|--------------------------------------------------------|---------|------------|
| TcCLB.509017.30   | vacuolar ATP synthase subunit d                        | -0,4396 | 0,0009218  |
| TcCLB.506113.50   | ATP-dependent DEAD/H RNA helicase (pseudogene), putat  | -0,4396 | 0,1661     |
| TcCLB.509161.130  | ATP-dependent DEAD/H RNA helicase, putative            | -0,4397 | 1,649E-06  |
| TcCLB.509965.40   | ubiquitin hydrolase, putative                          | -0,4399 | 0,0002112  |
| TcCLB.510431.320  | hypothetical protein, conserved                        | -0,4399 | 0,0002577  |
| TcCLB.508153.1090 | hypothetical protein, conserved                        | -0,4399 | 0,0003897  |
| TcCLB.511181.30   | Iron-sulfur assembly protein 2, putative (Isa2)        | -0,44   | 0,05401    |
| TcCLB.504039.160  | mucin-associated surface protein (MASP), putative      | -0,44   | 0,4701     |
| TcCLB.511445.120  | hypothetical protein, conserved                        | -0,4401 | 0,001107   |
| TcCLB.510329.220  | hypothetical protein, conserved                        | -0,4404 | 0,0002023  |
| TcCLB.506833.20   | hypothetical protein, conserved                        | -0,4404 | 0,01957    |
| TcCLB.511277.440  | tubulin tyrosine ligase protein, putative              | -0,4405 | 0,003197   |
| TcCLB.504839.36   | hypothetical protein, conserved                        | -0,4407 | 0,01364    |
| TcCLB.509571.30   | hypothetical protein, conserved                        | -0,4408 | 4,086E-06  |
| TcCLB.506919.20   | trans-sialidase (pseudogene), putative                 | -0,4408 | 0,44       |
| TcCLB.507609.80   | hypothetical protein, conserved                        | -0,4409 | 0,02071    |
| TcCLB.508405.80   | cysteine peptidase, Clan CD, family C50, putative      | -0,441  | 0,0001555  |
| TcCLB.508461.460  | hypothetical protein, conserved                        | -0,441  | 0,0009066  |
| TcCLB.510687.80   | hypothetical protein, conserved                        | -0,441  | 0,001479   |
| TcCLB.511577.140  | hypothetical protein, conserved                        | -0,441  | 0,004245   |
| TcCLB.504201.30   | trans-sialidase, Group V, putative                     | -0,4412 | 0,2072     |
| TcCLB.511019.47   | N-acetyltransferase complex ARD1 subunit (pseudogene), | -0,4413 | 0,1099     |
| TcCLB.504643.20   | hypothetical protein, conserved                        | -0,4415 | 0,006405   |
| TcCLB.504115.100  | dispersed gene family protein 1 (DGF-1), putative      | -0,4415 | 0,01025    |
| TcCLB.511907.330  | retrotransposon hot spot (RHS) protein, putative       | -0,4416 | 0,000239   |
| TcCLB.511355.20   | hypothetical protein, conserved                        | -0,4416 | 0,0009319  |
| TcCLB.504157.30   | hypothetical protein, conserved                        | -0,4416 | 0,01919    |
| TcCLB.510839.20   | hypothetical protein                                   | -0,4418 | 0,0005376  |
| TcCLB.508153.250  | hypothetical protein                                   | -0,4419 | 0,0138     |
| TcCLB.508715.10   | oxidoreductase, putative (fragment)                    | -0,442  | 0,009751   |
| TcCLB.510073.70   | CCR4-NOT transcription complex subunit 2, putative     | -0,4422 | 0,0000716  |
| TcCLB.508411.60   | hypothetical protein, conserved                        | -0,4422 | 0,001092   |
| TcCLB.507801.19   | dynein heavy chain, putative                           | -0,4423 | 0,0004132  |
| TcCLB.511389.90   | hypothetical protein, conserved                        | -0,4423 | 0,001543   |
| TcCLB.510359.100  | hypothetical protein, conserved                        | -0,4425 | 0,02112    |
| TcCLB.508153.390  | hypothetical protein, conserved                        | -0,4426 | 0,0002243  |
| TcCLB.509683.24   | DNA-directed RNA polymerase I subunit, putative        | -0,4427 | 0,008654   |
| TcCLB.506567.74   | hypothetical protein, conserved                        | -0,4427 | 0,02408    |
| TcCLB.506425.70   | hypothetical protein, conserved                        | -0,4428 | 0,00003187 |
| TcCLB.511513.30   | hypothetical protein, conserved                        | -0,4429 | 1,499E-07  |
| TcCLB.506627.60   | ADP-ribosylation factor, putative                      | -0,4429 | 0,00348    |
| TcCLB.510279.30   | hypothetical protein                                   | -0,4429 | 0,4685     |
| TcCLB.510533.110  | hypothetical protein, conserved                        | -0,443  | 0,0003077  |
| TcCLB.506755.190  | hypothetical protein, conserved                        | -0,4432 | 0,0003637  |
| TcCLB.507077.40   | hypothetical protein, conserved                        | -0,4432 | 0,002331   |

|                  |                                                          |         |            |
|------------------|----------------------------------------------------------|---------|------------|
| TcCLB.508217.9   | dynein heavy chain, putative                             | -0,4432 | 0,003189   |
| TcCLB.511229.70  | hypothetical protein, conserved                          | -0,4432 | 0,009665   |
| TcCLB.505943.20  | oxidoreductase, putative                                 | -0,4433 | 0,006088   |
| TcCLB.507143.30  | hypothetical protein                                     | -0,4434 | 7,321E-09  |
| TcCLB.511587.111 | N-acetyltransferase complex ARD1 subunit (pseudogene),   | -0,4434 | 0,1608     |
| TcCLB.508873.390 | trans-sialidase, Group V, putative                       | -0,4435 | 0,1677     |
| TcCLB.507089.230 | hypothetical protein, conserved                          | -0,4436 | 0,00003696 |
| TcCLB.503653.90  | hypothetical protein, conserved                          | -0,4436 | 0,001619   |
| TcCLB.503969.10  | tubulin delta chain (TUBD1)                              | -0,4436 | 0,005739   |
| TcCLB.510819.60  | ATP-dependent protease ATPase subunit HslU1, putative (I | -0,4439 | 3,996E-07  |
| TcCLB.511037.30  | hypothetical protein, conserved                          | -0,4439 | 0,00000227 |
| TcCLB.508643.30  | DnaJ chaperone protein, putative                         | -0,4439 | 0,007106   |
| TcCLB.510543.30  | trans-sialidase (pseudogene), putative                   | -0,444  | 0,1955     |
| TcCLB.469785.10  | hypothetical protein, conserved                          | -0,4441 | 0,000108   |
| TcCLB.507541.20  | hypothetical protein, conserved                          | -0,4441 | 0,0001994  |
| TcCLB.507951.260 | aspartic peptidase, clan AD, family A22B, putative       | -0,4442 | 3,743E-06  |
| TcCLB.504109.80  | Intraflagellar transport protein 144, putative (PIFTF6)  | -0,4444 | 4,435E-06  |
| TcCLB.506605.190 | hypothetical protein, conserved                          | -0,4444 | 0,001128   |
| TcCLB.511429.10  | transmembrane protein, conserved (fragment)              | -0,4445 | 3,117E-06  |
| TcCLB.506173.10  | hypothetical protein, conserved                          | -0,4446 | 0,01471    |
| TcCLB.511019.54  | ATP-dependent DEAD/H RNA helicase (pseudogene), putat    | -0,4446 | 0,2565     |
| TcCLB.507015.30  | trans-sialidase (pseudogene), putative                   | -0,4447 | 0,007548   |
| TcCLB.511419.4   | hypothetical protein, conserved (fragment)               | -0,4447 | 0,09834    |
| TcCLB.510819.20  | hypothetical protein, conserved                          | -0,4448 | 0,01141    |
| TcCLB.504217.4   | hypothetical protein, conserved (fragment)               | -0,4448 | 0,02766    |
| TcCLB.511847.70  | hypothetical protein, conserved                          | -0,4449 | 0,001829   |
| TcCLB.506181.80  | hypothetical protein, conserved                          | -0,4449 | 0,01848    |
| TcCLB.511211.130 | receptor for activated C kinase 1, putative              | -0,445  | 6,099E-08  |
| TcCLB.510421.330 | hypothetical protein, conserved (fragment)               | -0,445  | 9,827E-07  |
| TcCLB.510895.20  | hypothetical protein, conserved                          | -0,445  | 0,0006705  |
| TcCLB.510173.80  | hypothetical protein                                     | -0,4451 | 0,008705   |
| TcCLB.510659.44  | cysteine desulfurase, putative                           | -0,4452 | 0,0002701  |
| TcCLB.504185.20  | hypothetical protein, conserved                          | -0,4452 | 0,0008967  |
| TcCLB.506947.80  | arginine N-methyltransferase, type I (PRMT6)             | -0,4454 | 0,01216    |
| TcCLB.510483.60  | trans-sialidase, Group V, putative                       | -0,4456 | 0,2025     |
| TcCLB.510735.50  | hypothetical protein, conserved                          | -0,4457 | 0,0001448  |
| TcCLB.510657.140 | hypothetical protein, conserved                          | -0,4457 | 0,001182   |
| TcCLB.503515.14  | ubiquitin-conjugating enzyme E2, putative                | -0,4459 | 0,004146   |
| TcCLB.510013.180 | hypothetical protein                                     | -0,446  | 0,3626     |
| TcCLB.476733.10  | hypothetical protein, conserved                          | -0,4461 | 0,00001606 |
| TcCLB.507017.10  | hypothetical protein, conserved                          | -0,4462 | 9,542E-06  |
| TcCLB.510339.74  | mitochondrial carrier protein, putative                  | -0,4462 | 0,0001266  |
| TcCLB.510737.79  | 60S ribosomal subunit protein L31, putative              | -0,4462 | 0,2636     |
| TcCLB.506249.60  | 40S ribosomal protein S8, putative                       | -0,4463 | 0,00003012 |
| TcCLB.510943.100 | acetyltransferase, putative                              | -0,4463 | 0,005923   |

|                  |                                                                      |         |            |
|------------------|----------------------------------------------------------------------|---------|------------|
| TcCLB.508479.120 | pumilio/PUF RNA binding protein 8, putative (PUF8)                   | -0,4464 | 5,972E-08  |
| TcCLB.511421.20  | Non cytoplasmic domain containing protein, conserved                 | -0,4465 | 0,0002591  |
| TcCLB.509911.4   | hypothetical protein, conserved                                      | -0,4465 | 0,01988    |
| TcCLB.508755.20  | dispersed gene family protein 1 (DGF-1, pseudogene), putative        | -0,4466 | 0,1548     |
| TcCLB.509229.20  | hypothetical protein, conserved                                      | -0,4468 | 2,256E-06  |
| TcCLB.509911.60  | hypothetical protein                                                 | -0,4468 | 0,00001386 |
| TcCLB.504041.4   | RNA polymerase I                                                     | -0,4468 | 0,03124    |
| TcCLB.506305.20  | hypothetical protein, conserved                                      | -0,4471 | 0,0007924  |
| TcCLB.508207.64  | hypothetical protein, conserved                                      | -0,4471 | 0,001805   |
| TcCLB.510275.306 | mucin-associated surface protein (MASP, pseudogene), putative        | -0,4472 | 0,1067     |
| TcCLB.510089.70  | hypothetical protein                                                 | -0,4473 | 0,05109    |
| TcCLB.506303.30  | hypothetical protein, conserved                                      | -0,4474 | 0,005382   |
| TcCLB.511471.60  | protein kinase, putative                                             | -0,4476 | 0,2143     |
| TcCLB.463155.40  | glycine dehydrogenase [decarboxylating] (pseudogene), putative       | -0,4477 | 0,002078   |
| TcCLB.511509.10  | hypothetical protein, conserved                                      | -0,4477 | 0,007082   |
| TcCLB.506599.150 | mucin-associated surface protein (MASP), putative                    | -0,4478 | 0,1814     |
| TcCLB.511283.124 | mitochondrial carrier protein, putative                              | -0,448  | 0,0002774  |
| TcCLB.506519.110 | hypothetical protein, conserved                                      | -0,4481 | 0,000298   |
| TcCLB.511003.221 | cleavage and polyadenylation specificity factor, putative (fragment) | -0,4482 | 0,00006969 |
| TcCLB.510597.30  | hypothetical protein, conserved                                      | -0,4483 | 3,913E-06  |
| TcCLB.447255.20  | Sir2-related protein 3, putative (SIR2rp3)                           | -0,4483 | 0,004834   |
| TcCLB.510275.160 | trans-sialidase (pseudogene), putative                               | -0,4483 | 0,2123     |
| TcCLB.508207.80  | Mini-chromosome maintenance complex-binding protein (MCM2), putative | -0,4484 | 0,000549   |
| TcCLB.507257.10  | hypothetical protein, conserved                                      | -0,4484 | 0,007288   |
| TcCLB.504213.120 | proteasome alpha 3 subunit, putative                                 | -0,4485 | 3,049E-06  |
| TcCLB.504117.20  | sedoheptulose-1,7-bisphosphatase, putative                           | -0,4486 | 0,01416    |
| TcCLB.511193.9   | dispersed gene family protein 1 (DGF-1, pseudogene), putative        | -0,4486 | 0,03788    |
| TcCLB.506499.160 | mucin-associated surface protein (MASP), putative                    | -0,4487 | 0,1492     |
| TcCLB.507641.40  | hypothetical protein, conserved                                      | -0,4488 | 2,109E-08  |
| TcCLB.507395.30  | hypothetical protein                                                 | -0,4488 | 0,03957    |
| TcCLB.503891.40  | hypothetical protein, conserved                                      | -0,4489 | 0,00009888 |
| TcCLB.508641.300 | hypothetical protein                                                 | -0,4489 | 0,0002605  |
| TcCLB.510901.140 | hypothetical protein, conserved                                      | -0,4489 | 0,002508   |
| TcCLB.509965.170 | hypothetical protein, conserved                                      | -0,449  | 0,00005464 |
| TcCLB.506841.12  | hypothetical protein, conserved                                      | -0,449  | 0,002612   |
| TcCLB.506957.46  | hypothetical protein, conserved                                      | -0,4491 | 0,003671   |
| TcCLB.503897.30  | hypothetical protein, conserved                                      | -0,4492 | 0,0005302  |
| TcCLB.508059.24  | hypothetical protein, conserved                                      | -0,4494 | 0,0003547  |
| TcCLB.508153.880 | hypothetical protein, conserved                                      | -0,4495 | 0,00003043 |
| TcCLB.511859.180 | proteasome regulatory ATPase subunit 2, putative                     | -0,4496 | 2,172E-06  |
| TcCLB.503643.6   | hypothetical protein, conserved                                      | -0,4497 | 0,0005296  |
| TcCLB.506337.40  | glycosyl transferase-like protein, putative                          | -0,4497 | 0,007827   |
| TcCLB.442495.19  | KU70 protein, putative (fragment)                                    | -0,4497 | 0,04626    |
| TcCLB.508725.4   | hypothetical protein, conserved                                      | -0,4498 | 0,003912   |
| TcCLB.504033.210 | hypothetical protein, conserved                                      | -0,4498 | 0,04561    |

|                  |                                                           |         |            |
|------------------|-----------------------------------------------------------|---------|------------|
| TcCLB.506945.50  | hypothetical protein, conserved                           | -0,4502 | 0,00004905 |
| TcCLB.510099.10  | hypothetical protein, conserved                           | -0,4502 | 0,0005934  |
| TcCLB.511317.40  | hypothetical protein, conserved                           | -0,4502 | 0,0006803  |
| TcCLB.510431.280 | RNA editing complex protein MP46, putative                | -0,4502 | 0,001765   |
| TcCLB.506479.20  | hypothetical protein, conserved                           | -0,4505 | 0,001868   |
| TcCLB.506657.10  | hypothetical protein, conserved                           | -0,4506 | 0,04766    |
| TcCLB.509065.79  | hypothetical protein, conserved                           | -0,4507 | 0,0005693  |
| TcCLB.506195.80  | adenylate kinase, putative                                | -0,4507 | 0,005592   |
| TcCLB.511045.20  | hypothetical protein, conserved                           | -0,4507 | 0,01403    |
| TcCLB.510237.21  | hypothetical protein, conserved (pseudogene)              | -0,4508 | 0,1392     |
| TcCLB.506321.260 | hypothetical protein, conserved                           | -0,4509 | 0,01519    |
| TcCLB.508817.10  | hypothetical protein, conserved                           | -0,451  | 0,02115    |
| TcCLB.510329.140 | hypothetical protein, conserved                           | -0,4512 | 1,858E-09  |
| TcCLB.505937.70  | trans-sialidase (pseudogene), putative                    | -0,4512 | 0,05605    |
| TcCLB.507943.40  | histone H4, putative                                      | -0,4513 | 3,595E-08  |
| TcCLB.508169.60  | dolicholphosphate-mannose synthase, putative (DPMS)       | -0,4513 | 0,001109   |
| TcCLB.511555.50  | hypothetical protein, conserved                           | -0,4514 | 0,002344   |
| TcCLB.506975.70  | hypothetical protein                                      | -0,4514 | 0,04715    |
| TcCLB.506509.60  | hypothetical protein, conserved                           | -0,4515 | 0,02528    |
| TcCLB.503593.40  | hypothetical protein                                      | -0,4517 | 0,00005928 |
| TcCLB.507997.40  | hypothetical protein, conserved                           | -0,4517 | 0,001145   |
| TcCLB.508321.50  | hypothetical protein, conserved                           | -0,4518 | 6,468E-07  |
| TcCLB.510121.160 | DNA topoisomerase IA, putative                            | -0,4518 | 1,034E-06  |
| TcCLB.508881.130 | hypothetical protein, conserved                           | -0,4518 | 0,003356   |
| TcCLB.405165.10  | hypothetical protein, conserved                           | -0,4519 | 0,01474    |
| TcCLB.508387.50  | bilobe protein, conserved                                 | -0,452  | 0,00008627 |
| TcCLB.510377.350 | mucin-associated surface protein (MASP), putative         | -0,452  | 0,1783     |
| TcCLB.508165.420 | mucin-associated surface protein (MASP), putative         | -0,4524 | 0,03045    |
| TcCLB.510295.20  | MP24, putative                                            | -0,4524 | 0,03289    |
| TcCLB.508777.140 | palmitoyl acyltransferase 5, putative                     | -0,4525 | 0,00008872 |
| TcCLB.511027.29  | hypothetical protein, conserved (pseudogene)              | -0,4525 | 0,003006   |
| TcCLB.509179.50  | hypothetical protein                                      | -0,4526 | 0,002833   |
| TcCLB.506495.6   | hypothetical protein, conserved                           | -0,4526 | 0,005498   |
| TcCLB.506529.541 | hypothetical protein                                      | -0,4526 | 0,0487     |
| TcCLB.510131.60  | hypothetical protein                                      | -0,4527 | 0,001956   |
| TcCLB.508939.60  | hypothetical protein                                      | -0,4527 | 0,02473    |
| TcCLB.506975.66  | hypothetical protein, conserved                           | -0,453  | 0,00002195 |
| TcCLB.503787.65  | hypothetical protein (pseudogene)                         | -0,4531 | 0,3249     |
| TcCLB.504045.114 | hypothetical protein, conserved                           | -0,4532 | 0,03914    |
| TcCLB.507081.70  | hypothetical protein, conserved                           | -0,4533 | 0,0000472  |
| TcCLB.507017.104 | hypothetical protein                                      | -0,4533 | 0,01006    |
| TcCLB.510173.60  | intraflagellar transport protein 122B, putative (IFT122B) | -0,4535 | 2,256E-06  |
| TcCLB.507511.20  | hypothetical protein, conserved                           | -0,4535 | 0,00004498 |
| TcCLB.507159.20  | hypothetical protein, conserved                           | -0,4535 | 0,002033   |
| TcCLB.510963.30  | mRNA capping methyltransferase, putative                  | -0,4535 | 0,005187   |

|                   |                                                          |         |            |
|-------------------|----------------------------------------------------------|---------|------------|
| TcCLB.511875.40   | surface protease GP63 (pseudogene), putative             | -0,4536 | 0,005286   |
| TcCLB.511731.35   | hypothetical protein, conserved                          | -0,4537 | 0,004023   |
| TcCLB.508269.70   | hypothetical protein, conserved                          | -0,4537 | 0,06119    |
| TcCLB.510031.50   | ATP-dependent RNA helicase, putative                     | -0,4538 | 0,001469   |
| TcCLB.509029.10   | serine/threonine protein phosphatase, putative           | -0,4539 | 0,001089   |
| TcCLB.506811.10   | kinesin, putative                                        | -0,454  | 0,0001277  |
| TcCLB.507071.10   | trans-sialidase, Group V, putative                       | -0,454  | 0,1578     |
| TcCLB.510409.50   | hypothetical protein, conserved                          | -0,4542 | 0,00131    |
| TcCLB.510089.120  | hypothetical protein, conserved                          | -0,4542 | 0,002525   |
| TcCLB.504213.20   | hypothetical protein, conserved                          | -0,4543 | 1,476E-06  |
| TcCLB.467287.20   | hypothetical protein, conserved                          | -0,4543 | 0,1984     |
| TcCLB.509875.20   | dispersed gene family protein 1 (DGF-1), putative        | -0,4544 | 0,03766    |
| TcCLB.506511.10   | hypothetical protein, conserved                          | -0,4545 | 0,03561    |
| TcCLB.408345.10   | hypothetical protein, conserved                          | -0,4546 | 0,08102    |
| TcCLB.511217.110  | hypothetical protein, conserved                          | -0,4547 | 5,847E-06  |
| TcCLB.504179.69   | phosphoprotein lepp12, putative                          | -0,4547 | 0,003338   |
| TcCLB.510025.200  | syntaxin binding protein (pseudogene), putative          | -0,4547 | 0,249      |
| TcCLB.508231.30   | target of rapamycin (TOR) kinase 1, putative (TOR1)      | -0,4548 | 1,444E-13  |
| TcCLB.506329.79   | mucin-associated surface protein (MASP, pseudogene), pu  | -0,4549 | 0,4932     |
| TcCLB.508409.40   | Putative intraflagellar transport protein B2 (PIFTB2)    | -0,4553 | 5,613E-06  |
| TcCLB.509161.34   | hypothetical protein, conserved                          | -0,4553 | 0,0005388  |
| TcCLB.511183.460  | dispersed gene family protein 1 (DGF-1), putative        | -0,4554 | 0,06682    |
| TcCLB.506331.64   | hypothetical protein                                     | -0,4554 | 0,1342     |
| TcCLB.506211.130  | hypothetical protein, conserved                          | -0,4555 | 0,00005699 |
| TcCLB.511611.40   | hypothetical protein                                     | -0,4555 | 0,3298     |
| TcCLB.508723.120  | hypothetical protein, conserved                          | -0,4556 | 0,004449   |
| TcCLB.507009.100  | cyclophilin, putative                                    | -0,4557 | 0,005323   |
| TcCLB.509167.170  | hypothetical protein, conserved                          | -0,4557 | 0,008068   |
| TcCLB.511127.5    | RNA helicase, putative                                   | -0,4559 | 0,1663     |
| TcCLB.510299.30   | hypothetical protein, conserved                          | -0,4561 | 0,001921   |
| TcCLB.503453.60   | GTP-ase activating protein, putative                     | -0,4561 | 0,004652   |
| TcCLB.503939.100  | hypothetical protein, conserved                          | -0,4562 | 0,0000013  |
| TcCLB.508549.30   | target of rapamycin (TOR) kinase 1, putative             | -0,4562 | 0,0006435  |
| TcCLB.511797.215  | hypothetical protein, conserved (pseudogene)             | -0,4562 | 0,08747    |
| TcCLB.506945.30   | CAS/CSE/importin domain protein, putative                | -0,4563 | 1,021E-06  |
| TcCLB.507521.90   | hypothetical protein, conserved                          | -0,4564 | 0,01682    |
| TcCLB.507485.150  | amastin, putative                                        | -0,4566 | 0,00001956 |
| TcCLB.504867.10   | hypothetical protein, conserved                          | -0,4566 | 0,002342   |
| TcCLB.509771.10   | trans-sialidase, Group II, putative                      | -0,4566 | 0,3956     |
| TcCLB.509099.120  | hypothetical protein, conserved                          | -0,4567 | 0,004283   |
| TcCLB.507605.13   | mucin-associated surface protein (MASP), putative (fragm | -0,4567 | 0,5289     |
| TcCLB.508153.1050 | hypothetical protein, conserved                          | -0,4568 | 3,51E-09   |
| TcCLB.505229.5    | hypothetical protein, conserved (fragment)               | -0,4569 | 0,001845   |
| TcCLB.510121.190  | hypothetical protein, conserved                          | -0,4569 | 0,009171   |
| TcCLB.504431.40   | hypothetical protein, conserved                          | -0,457  | 0,0005363  |

|                  |                                                                   |         |            |
|------------------|-------------------------------------------------------------------|---------|------------|
| TcCLB.508741.280 | ubiquitin-conjugating enzyme E2, putative                         | -0,457  | 0,001157   |
| TcCLB.506691.64  | cytochrome c oxidase copper chaperone, putative                   | -0,4571 | 0,03804    |
| TcCLB.510355.260 | hypothetical protein, conserved                                   | -0,4572 | 0,05885    |
| TcCLB.507007.99  | mitochondrial carrier protein (pseudogene), putative              | -0,4573 | 0,0002849  |
| TcCLB.509205.90  | surface protease GP63 (pseudogene), putative                      | -0,4576 | 0,02794    |
| TcCLB.504069.90  | centromere/microtubule binding protein cbf5, putative             | -0,4577 | 8,846E-06  |
| TcCLB.508441.80  | Mitochondrial-processing peptidase subunit alpha (MPPA)           | -0,4578 | 1,667E-07  |
| TcCLB.511587.33  | hypothetical protein                                              | -0,4578 | 0,07757    |
| TcCLB.508909.270 | hypothetical protein, conserved                                   | -0,4579 | 0,00002113 |
| TcCLB.509287.20  | protein kinase, putative                                          | -0,4579 | 0,0001835  |
| TcCLB.506227.240 | hypothetical protein, conserved                                   | -0,458  | 1,044E-06  |
| TcCLB.506241.90  | hypothetical protein, conserved                                   | -0,458  | 0,0003723  |
| TcCLB.511725.90  | hypothetical protein, conserved                                   | -0,458  | 0,00109    |
| TcCLB.506559.4   | hypothetical protein, conserved (fragment)                        | -0,458  | 0,001719   |
| TcCLB.509657.20  | dispersed gene family protein 1 (DGF-1), putative                 | -0,458  | 0,01996    |
| TcCLB.507185.40  | trans-sialidase (pseudogene), putative                            | -0,458  | 0,145      |
| TcCLB.506517.140 | hypothetical protein, conserved                                   | -0,4581 | 0,000175   |
| TcCLB.508347.140 | hypothetical protein, conserved                                   | -0,4581 | 0,0001764  |
| TcCLB.506515.20  | O-sialoglycoprotein endopeptidase, putative                       | -0,4581 | 0,0007192  |
| TcCLB.508235.10  | hypothetical protein, conserved (pseudogene)                      | -0,4582 | 0,0019     |
| TcCLB.511229.20  | oxidoreductase, putative                                          | -0,4582 | 0,01365    |
| TcCLB.509163.6   | hypothetical protein                                              | -0,4583 | 0,4566     |
| TcCLB.511731.30  | serine/threonine protein phosphatase, putative                    | -0,4589 | 0,0001404  |
| TcCLB.506977.10  | dual specificity protein phosphatase, putative                    | -0,459  | 0,004617   |
| TcCLB.508903.90  | dispersed gene family protein 1 (DGF-1, pseudogene), putative     | -0,4592 | 0,0109     |
| TcCLB.506717.20  | receptor-type adenylate cyclase, putative                         | -0,4594 | 0,00003136 |
| TcCLB.511847.50  | hypothetical protein, conserved                                   | -0,4597 | 0,00003738 |
| TcCLB.511245.20  | hypothetical protein, conserved                                   | -0,4598 | 0,00836    |
| TcCLB.507023.200 | queuine tRNA-ribosyltransferase, putative                         | -0,4599 | 0,000163   |
| TcCLB.508783.10  | hypothetical protein, conserved (pseudogene)                      | -0,4599 | 0,0001992  |
| TcCLB.509967.7   | hypothetical protein, conserved                                   | -0,4599 | 0,06356    |
| TcCLB.503827.100 | trans-sialidase, Group VI, putative                               | -0,4599 | 0,2824     |
| TcCLB.509789.50  | rab-like GTPase activating protein, putative                      | -0,46   | 0,0002084  |
| TcCLB.508307.44  | hypothetical protein, conserved                                   | -0,4601 | 0,00005911 |
| TcCLB.509795.70  | hypothetical protein, conserved                                   | -0,4602 | 0,00005237 |
| TcCLB.506739.10  | Eukaryotic translation initiation factor 4 gamma type 1, putative | -0,4603 | 0,00009477 |
| TcCLB.503919.20  | hypothetical protein, conserved                                   | -0,4603 | 0,036      |
| TcCLB.503875.40  | hypothetical protein                                              | -0,4603 | 0,2615     |
| TcCLB.508139.250 | trans-sialidase, Group II, putative                               | -0,4604 | 0,002363   |
| TcCLB.449759.9   | hypothetical protein, conserved                                   | -0,4604 | 0,0109     |
| TcCLB.511459.70  | hypothetical protein, conserved                                   | -0,4604 | 0,2285     |
| TcCLB.508243.60  | mucin TcMUCII, putative                                           | -0,4605 | 0,3503     |
| TcCLB.508247.80  | mucin-associated surface protein (MASP), putative                 | -0,4606 | 0,3713     |
| TcCLB.510835.10  | hypothetical protein, conserved                                   | -0,4608 | 0,1436     |
| TcCLB.510089.200 | hypothetical protein, conserved                                   | -0,4609 | 0,00000319 |

|                  |                                                               |         |            |
|------------------|---------------------------------------------------------------|---------|------------|
| TcCLB.504109.60  | hypothetical protein, conserved                               | -0,4609 | 0,00001096 |
| TcCLB.509837.40  | histone H1, putative                                          | -0,4609 | 0,02573    |
| TcCLB.510687.90  | hypothetical protein, conserved                               | -0,461  | 0,0002905  |
| TcCLB.511667.50  | mucin-associated surface protein (MASP), putative             | -0,4611 | 0,08432    |
| TcCLB.508711.40  | mitochondrial RNA binding protein, putative                   | -0,4614 | 4,636E-06  |
| TcCLB.508871.110 | trans-sialidase, Group V, putative                            | -0,4614 | 0,1963     |
| TcCLB.511437.20  | expression site-associated gene (ESAG-like) protein, putative | -0,4614 | 0,2126     |
| TcCLB.511727.110 | hypothetical protein, conserved                               | -0,4615 | 0,0003203  |
| TcCLB.506735.40  | hypothetical protein                                          | -0,4617 | 0,00117    |
| TcCLB.509793.69  | hypothetical protein, conserved                               | -0,4618 | 6,826E-06  |
| TcCLB.508895.50  | RNA-binding protein, putative                                 | -0,462  | 0,00002458 |
| TcCLB.504105.10  | hypothetical protein, conserved                               | -0,4621 | 0,002367   |
| TcCLB.508219.10  | mucin-associated surface protein (MASP, pseudogene), putative | -0,4621 | 0,3067     |
| TcCLB.507027.59  | pre-mRNA cleavage complex II Clp1 protein, putative           | -0,4622 | 0,001175   |
| TcCLB.511589.209 | hypothetical protein, conserved                               | -0,4622 | 0,0749     |
| TcCLB.503619.20  | hypothetical protein, conserved                               | -0,4623 | 0,0004353  |
| TcCLB.507629.39  | hypothetical protein, conserved (fragment)                    | -0,4624 | 9,993E-08  |
| TcCLB.507993.30  | hypothetical protein, conserved                               | -0,4624 | 0,000174   |
| TcCLB.504219.70  | mucin TcMUC, putative (fragment)                              | -0,4624 | 0,1364     |
| TcCLB.508347.10  | hypothetical protein, conserved                               | -0,4625 | 0,00004312 |
| TcCLB.510955.4   | lipase-like protein, putative                                 | -0,4625 | 0,0003161  |
| TcCLB.511151.60  | hypothetical protein                                          | -0,4626 | 0,0005003  |
| TcCLB.503997.10  | hypothetical protein, conserved                               | -0,4626 | 0,005004   |
| TcCLB.509695.150 | kinesin, putative                                             | -0,4627 | 6,129E-13  |
| TcCLB.511173.250 | mucin-associated surface protein (MASP, pseudogene), putative | -0,4627 | 0,1129     |
| TcCLB.508525.20  | hypothetical protein, conserved                               | -0,4631 | 3,592E-07  |
| TcCLB.511907.260 | cell division cycle protein 20, putative (CDC20)              | -0,4634 | 8,169E-08  |
| TcCLB.508637.110 | nucleotide-binding protein, putative                          | -0,4634 | 0,002071   |
| TcCLB.511293.60  | kinesin, putative                                             | -0,4635 | 1,039E-06  |
| TcCLB.506355.160 | hypothetical protein, conserved                               | -0,4635 | 0,0003849  |
| TcCLB.510979.50  | mucin-associated surface protein (MASP), putative             | -0,4635 | 0,03739    |
| TcCLB.506319.50  | hypothetical protein, conserved                               | -0,4637 | 0,0000852  |
| TcCLB.509795.89  | phosphoprotein lepp12, putative                               | -0,4637 | 0,001829   |
| TcCLB.508249.10  | dispersed gene family protein 1 (DGF-1), putative             | -0,4637 | 0,04166    |
| TcCLB.506529.660 | hypothetical protein, conserved                               | -0,4638 | 0,01036    |
| TcCLB.509897.20  | trans-sialidase, Group V, putative                            | -0,4638 | 0,07538    |
| TcCLB.511119.10  | dispersed gene family protein 1 (DGF-1), putative (fragment)  | -0,4638 | 0,1173     |
| TcCLB.509819.10  | hypothetical protein, conserved                               | -0,4639 | 0,0001267  |
| TcCLB.509127.40  | hypothetical protein, conserved                               | -0,4639 | 0,0006142  |
| TcCLB.510891.40  | trans-sialidase (pseudogene), putative                        | -0,4639 | 0,0052     |
| TcCLB.511865.30  | hypothetical protein, conserved                               | -0,4639 | 0,005992   |
| TcCLB.510713.30  | trans-sialidase, Group VII, putative                          | -0,464  | 0,09151    |
| TcCLB.509775.49  | ribosomal protein L2, putative                                | -0,4641 | 0,0725     |
| TcCLB.508435.40  | mucin-associated surface protein (MASP, pseudogene), putative | -0,4641 | 0,204      |
| TcCLB.510105.140 | hypothetical protein, conserved (pseudogene)                  | -0,4642 | 0,0007723  |



|                  |                                                       |         |            |
|------------------|-------------------------------------------------------|---------|------------|
| TcCLB.510879.200 | hypothetical protein, conserved                       | -0,4643 | 0,004174   |
| TcCLB.506337.120 | hypothetical protein, conserved                       | -0,4643 | 0,007935   |
| TcCLB.508163.70  | dispersed gene family protein 1 (DGF-1), putative     | -0,4643 | 0,09944    |
| TcCLB.508355.320 | arginyl-tRNA synthetase, putative                     | -0,4645 | 1,047E-07  |
| TcCLB.511287.110 | hypothetical protein, conserved                       | -0,4645 | 1,137E-07  |
| TcCLB.506409.255 | surface protease GP63, putative                       | -0,4645 | 0,5861     |
| TcCLB.508219.20  | trans-sialidase, Group V, putative                    | -0,4646 | 0,1763     |
| TcCLB.511491.30  | hypothetical protein, conserved                       | -0,4648 | 0,0002042  |
| TcCLB.510769.70  | hypothetical protein                                  | -0,4648 | 0,00037    |
| TcCLB.509265.50  | hypothetical protein, conserved (pseudogene)          | -0,4648 | 0,002016   |
| TcCLB.509023.30  | hypothetical protein                                  | -0,4649 | 0,01275    |
| TcCLB.511523.90  | hypothetical protein, conserved                       | -0,465  | 0,0000129  |
| TcCLB.468041.10  | hypothetical protein                                  | -0,465  | 0,0269     |
| TcCLB.507093.75  | B9 domain-containing protein 2 (b9d2)                 | -0,4653 | 0,007627   |
| TcCLB.511277.20  | DNA-directed RNA polymerase II/III subunit, putative  | -0,4654 | 0,001499   |
| TcCLB.510915.21  | surface protease GP63 (pseudogene), putative          | -0,4655 | 0,06831    |
| TcCLB.510693.310 | syntaxin binding protein (pseudogene), putative       | -0,4655 | 0,2898     |
| TcCLB.508269.73  | ATP-dependent DEAD/H RNA helicase (pseudogene), putat | -0,4656 | 0,03653    |
| TcCLB.507395.40  | hypothetical protein                                  | -0,4656 | 0,509      |
| TcCLB.511713.30  | hypothetical protein, conserved                       | -0,4657 | 0,002615   |
| TcCLB.509589.30  | Kinesin-13 5, putative (KIN13-5)                      | -0,4661 | 0,00000082 |
| TcCLB.509105.80  | hypothetical protein, conserved                       | -0,4661 | 0,001959   |
| TcCLB.506245.140 | trans-sialidase (pseudogene), putative                | -0,4661 | 0,5118     |
| TcCLB.508741.100 | hypothetical protein, conserved                       | -0,4662 | 0,00005502 |
| TcCLB.507023.160 | hypothetical protein, conserved                       | -0,4663 | 3,257E-09  |
| TcCLB.503809.50  | hypothetical protein, conserved                       | -0,4663 | 0,009562   |
| TcCLB.507099.40  | hypothetical protein, conserved                       | -0,4664 | 2,638E-12  |
| TcCLB.506925.130 | eukaryotic initiation factor 5a, putative             | -0,4665 | 0,0004509  |
| TcCLB.506213.120 | ATP-dependent RNA helicase, putative                  | -0,4666 | 0,0005454  |
| TcCLB.511491.140 | hypothetical protein, conserved                       | -0,4667 | 0,00001766 |
| TcCLB.503527.50  | hypothetical protein, conserved                       | -0,4668 | 0,003929   |
| TcCLB.507715.90  | hypothetical protein, conserved                       | -0,4669 | 0,00000141 |
| TcCLB.506553.40  | ATP-dependent RNA helicase (pseudogene), putative     | -0,4669 | 0,00003901 |
| TcCLB.508951.60  | hypothetical protein, conserved                       | -0,4669 | 0,0008403  |
| TcCLB.507445.30  | trans-sialidase (pseudogene), putative                | -0,467  | 0,02188    |
| TcCLB.506369.40  | hypothetical protein, conserved                       | -0,4671 | 2,723E-06  |
| TcCLB.509395.120 | histone deacetylase, putative                         | -0,4671 | 7,196E-06  |
| TcCLB.509671.120 | rRNA processing protein, putative                     | -0,4672 | 0,0006942  |
| TcCLB.511367.100 | hypothetical protein, conserved                       | -0,4672 | 0,001366   |
| TcCLB.507035.130 | hypothetical protein, conserved                       | -0,4673 | 8,872E-06  |
| TcCLB.504179.80  | hypothetical protein, conserved                       | -0,4674 | 0,00004301 |
| TcCLB.509561.100 | hypothetical protein, conserved                       | -0,4675 | 0,00001006 |
| TcCLB.506613.150 | trans-sialidase (pseudogene), putative                | -0,4675 | 0,1851     |
| TcCLB.508127.5   | hypothetical protein, conserved                       | -0,4676 | 0,04225    |
| TcCLB.509179.110 | hypothetical protein, conserved                       | -0,4677 | 0,00005875 |

|                  |                                                             |         |            |
|------------------|-------------------------------------------------------------|---------|------------|
| TcCLB.508177.40  | hypothetical protein, conserved                             | -0,4678 | 2,621E-07  |
| TcCLB.508693.20  | DNA topoisomerase IB, large subunit                         | -0,4681 | 4,435E-06  |
| TcCLB.510119.50  | hypothetical protein, conserved                             | -0,4683 | 0,0001747  |
| TcCLB.504867.40  | acetyltransferase, putative                                 | -0,4684 | 0,001368   |
| TcCLB.509735.60  | trans-sialidase (pseudogene), putative                      | -0,4684 | 0,02789    |
| TcCLB.511153.140 | proteasome beta 3 subunit, putative                         | -0,4685 | 0,001524   |
| TcCLB.511289.100 | hypothetical protein, conserved                             | -0,4686 | 2,366E-07  |
| TcCLB.511429.20  | cyclophilin 15, putative                                    | -0,4686 | 0,0007467  |
| TcCLB.507081.139 | hypothetical protein, conserved (fragment)                  | -0,4687 | 0,00001952 |
| TcCLB.504163.70  | hypothetical protein, conserved                             | -0,4687 | 0,000349   |
| TcCLB.509957.10  | hypothetical protein                                        | -0,4688 | 0,1432     |
| TcCLB.507071.120 | mucin-associated surface protein (MASP), putative           | -0,4688 | 0,1554     |
| TcCLB.509259.100 | ATP-dependent DEAD/H RNA helicase (pseudogene), putat       | -0,469  | 0,1978     |
| TcCLB.510131.50  | DNA polymerase kappa, putative                              | -0,4691 | 0,001494   |
| TcCLB.508719.50  | hypothetical protein, conserved                             | -0,4691 | 0,006895   |
| TcCLB.510337.40  | spermidine synthase, putative                               | -0,4692 | 2,935E-07  |
| TcCLB.511669.20  | hypothetical protein                                        | -0,4692 | 0,1535     |
| TcCLB.510841.20  | hypothetical protein, conserved                             | -0,4694 | 0,008305   |
| TcCLB.510123.60  | hypothetical protein, conserved                             | -0,4696 | 0,0003959  |
| TcCLB.506135.20  | hypothetical protein, conserved                             | -0,4698 | 3,478E-07  |
| TcCLB.511625.60  | hypothetical protein, conserved                             | -0,4698 | 0,01141    |
| TcCLB.511517.90  | hypothetical protein, conserved                             | -0,4699 | 0,00008357 |
| TcCLB.504075.3   | calmodulin, putative                                        | -0,4699 | 0,2164     |
| TcCLB.511511.60  | phospholipid-translocating P-type ATPase (flippase), putati | -0,47   | 0,0003818  |
| TcCLB.509657.70  | trans-sialidase (pseudogene), putative                      | -0,4701 | 0,3227     |
| TcCLB.511511.20  | tRNA modification enzyme, putative                          | -0,4702 | 0,007696   |
| TcCLB.510431.330 | hypothetical protein, conserved                             | -0,4702 | 0,008668   |
| TcCLB.504425.50  | hypothetical protein, conserved                             | -0,4702 | 0,04831    |
| TcCLB.507923.30  | vacuolar assembly protein vps41, putative                   | -0,4703 | 4,112E-06  |
| TcCLB.510879.100 | hypothetical protein                                        | -0,4703 | 0,001539   |
| TcCLB.506053.20  | hypothetical protein, conserved                             | -0,4703 | 0,002667   |
| TcCLB.509569.120 | RNA-binding protein, putative                               | -0,4705 | 9,779E-06  |
| TcCLB.509895.10  | mitochondrial RNA binding complex 1 subunit, putative       | -0,4706 | 1,209E-13  |
| TcCLB.509003.79  | coatomer beta subunit, putative (fragment)                  | -0,4707 | 0,000165   |
| TcCLB.510119.30  | hypothetical protein, conserved                             | -0,4707 | 0,002982   |
| TcCLB.503973.64  | hypothetical protein, conserved (pseudogene)                | -0,4707 | 0,3275     |
| TcCLB.511907.50  | lysophospholipase, putative                                 | -0,4708 | 8,258E-06  |
| TcCLB.509767.44  | hypothetical protein, conserved                             | -0,4708 | 0,0002133  |
| TcCLB.506211.170 | Multiprotein-bridging factor 1, putative (mbf1)             | -0,4711 | 0,00001221 |
| TcCLB.503945.10  | eukaryotic translation initiation factor 1A, putative       | -0,4711 | 0,0007189  |
| TcCLB.509069.20  | ATP binding protein-like protein, putative                  | -0,4712 | 0,001515   |
| TcCLB.509647.100 | hypothetical protein, conserved                             | -0,4713 | 0,0006515  |
| TcCLB.507723.110 | acetyltransferase, putative                                 | -0,4713 | 0,0008558  |
| TcCLB.506369.30  | hypothetical protein, conserved                             | -0,4713 | 0,005794   |
| TcCLB.506699.10  | hypothetical protein, conserved                             | -0,4713 | 0,005808   |

|                  |                                                             |         |            |
|------------------|-------------------------------------------------------------|---------|------------|
| TcCLB.506915.30  | hypothetical protein                                        | -0,4714 | 1,997E-06  |
| TcCLB.510279.10  | trans-sialidase (pseudogene), putative                      | -0,4715 | 0,2199     |
| TcCLB.508547.80  | hypothetical protein, conserved                             | -0,4716 | 2,297E-06  |
| TcCLB.506679.20  | hypothetical protein, conserved                             | -0,4717 | 0,08663    |
| TcCLB.510199.20  | elongation factor 1-gamma (EF-1-gamma, pseudogene), p       | -0,4717 | 0,3212     |
| TcCLB.509939.10  | hypothetical protein, conserved                             | -0,4718 | 0,0000031  |
| TcCLB.511761.80  | hypothetical protein                                        | -0,4718 | 0,0001544  |
| TcCLB.504433.14  | ADP-ribosylation factor-like protein 3A, putative           | -0,4718 | 0,0007429  |
| TcCLB.505939.60  | ribonuclease H1, putative                                   | -0,4718 | 0,003345   |
| TcCLB.509707.25  | hypothetical protein, conserved                             | -0,4718 | 0,02719    |
| TcCLB.507547.50  | hypothetical protein, conserved                             | -0,4719 | 0,0001914  |
| TcCLB.508277.230 | nucleolar RNA binding protein, putative                     | -0,472  | 1,769E-07  |
| TcCLB.505931.50  | histone H3, putative                                        | -0,472  | 0,09911    |
| TcCLB.511541.40  | hypothetical protein, conserved                             | -0,4721 | 0,00002036 |
| TcCLB.509997.30  | tryparedoxin 1, putative (TXN1)                             | -0,4721 | 0,0001765  |
| TcCLB.511275.30  | actin-related protein 2/3 complex subunit 1, putative (ARP) | -0,4721 | 0,001223   |
| TcCLB.428999.10  | hypothetical protein                                        | -0,4721 | 0,002661   |
| TcCLB.503829.30  | hypothetical protein, conserved                             | -0,4721 | 0,005721   |
| TcCLB.511577.83  | thioredoxin, putative                                       | -0,4721 | 0,0201     |
| TcCLB.508479.490 | hypothetical protein                                        | -0,4721 | 0,05284    |
| TcCLB.510275.350 | trans-sialidase, Group V, putative                          | -0,4721 | 0,1444     |
| TcCLB.511551.10  | trans-sialidase, Group II, putative                         | -0,4721 | 0,2396     |
| TcCLB.504935.20  | hypothetical protein, conserved                             | -0,4722 | 0,0008595  |
| TcCLB.503749.10  | hypothetical protein, conserved                             | -0,4723 | 0,0002836  |
| TcCLB.507823.39  | hypothetical protein, conserved                             | -0,4723 | 0,02067    |
| TcCLB.510363.260 | mucin-associated surface protein (MASP), putative           | -0,4723 | 0,3837     |
| TcCLB.507019.50  | hypothetical protein, conserved                             | -0,4724 | 0,001415   |
| TcCLB.509693.150 | hypothetical protein, conserved                             | -0,4727 | 0,0001296  |
| TcCLB.506559.440 | hypothetical protein, conserved                             | -0,4729 | 1,985E-09  |
| TcCLB.511903.30  | ubiquitin-conjugating enzyme E2, putative                   | -0,4729 | 0,00004863 |
| TcCLB.508169.120 | hypothetical protein, conserved                             | -0,4729 | 0,001116   |
| TcCLB.507093.30  | hypothetical protein, conserved                             | -0,473  | 0,00003351 |
| TcCLB.511111.40  | hypothetical protein, conserved                             | -0,473  | 0,0005218  |
| TcCLB.511727.50  | hypothetical protein, conserved                             | -0,4731 | 5,782E-09  |
| TcCLB.508625.10  | elongation factor 2, putative                               | -0,4731 | 8,04E-07   |
| TcCLB.508979.15  | mucin-associated surface protein (MASP, pseudogene), pu     | -0,4731 | 0,4642     |
| TcCLB.509587.10  | mitochondrial DNA polymerase I protein D, putative          | -0,4732 | 2,094E-11  |
| TcCLB.510729.70  | proteasome alpha 1 subunit, putative                        | -0,4732 | 6,344E-07  |
| TcCLB.509525.330 | hypothetical protein                                        | -0,4732 | 0,3351     |
| TcCLB.504033.220 | palmitoyl acyltransferase 1, putative                       | -0,4733 | 1,347E-06  |
| TcCLB.507103.10  | DnaJ chaperone protein, putative                            | -0,4733 | 0,0001839  |
| TcCLB.509229.50  | hypothetical protein                                        | -0,4733 | 0,04077    |
| TcCLB.508837.130 | hypothetical protein, conserved                             | -0,4735 | 0,00007033 |
| TcCLB.435519.19  | hypothetical protein, conserved (fragment)                  | -0,4735 | 0,0612     |
| TcCLB.509321.10  | hypothetical protein, conserved                             | -0,4736 | 3,922E-06  |

|                  |                                                                |         |            |
|------------------|----------------------------------------------------------------|---------|------------|
| TcCLB.509965.30  | small nuclear ribonucleoprotein Sm-E, putative                 | -0,4736 | 0,03027    |
| TcCLB.510483.360 | trans-sialidase, Group VII, putative                           | -0,4736 | 0,07956    |
| TcCLB.506181.120 | hypothetical protein, conserved                                | -0,4737 | 0,03686    |
| TcCLB.511229.80  | eukaryotic translation initiation factor 3 subunit 2, putative | -0,4738 | 1,141E-06  |
| TcCLB.504427.200 | poly(A)-specific ribonuclease PARN, putative                   | -0,4739 | 8,387E-06  |
| TcCLB.510975.30  | hypothetical protein, conserved                                | -0,474  | 0,0000648  |
| TcCLB.511865.60  | hypothetical protein, conserved                                | -0,4741 | 4,272E-06  |
| TcCLB.507297.30  | metacaspase, putative                                          | -0,4741 | 0,0003189  |
| TcCLB.503473.20  | hypothetical protein, conserved                                | -0,4741 | 0,001708   |
| TcCLB.511245.100 | hypothetical protein, conserved                                | -0,4742 | 0,0001261  |
| TcCLB.507005.70  | Pre-rRNA-processing protein PNO1, putative (PNO1)              | -0,4742 | 0,0004599  |
| TcCLB.505999.100 | 3-phosphoglycerate kinase, glycosomal (PGKA)                   | -0,4743 | 0,00001975 |
| TcCLB.506973.30  | mucin-associated surface protein (MASP), putative              | -0,4744 | 0,1903     |
| TcCLB.510629.430 | prefoldin subunit, putative                                    | -0,4745 | 0,00975    |
| TcCLB.506227.120 | hypothetical protein, conserved                                | -0,4747 | 0,0002258  |
| TcCLB.504157.90  | hypothetical protein, conserved                                | -0,4749 | 0,0007905  |
| TcCLB.507993.330 | mevalonate-diphosphate decarboxylase, putative                 | -0,475  | 0,00006094 |
| TcCLB.503973.280 | mucin-associated surface protein (MASP), putative              | -0,475  | 0,2007     |
| TcCLB.504071.70  | hypothetical protein, conserved                                | -0,4751 | 1,357E-08  |
| TcCLB.503425.29  | DNA replication licensing factor MCM8, putative                | -0,4751 | 0,001708   |
| TcCLB.508777.130 | hypothetical protein, conserved                                | -0,4752 | 0,00000461 |
| TcCLB.509145.10  | hypothetical protein, conserved                                | -0,4752 | 0,00006957 |
| TcCLB.506727.100 | enoyl-CoA hydratase/isomerase family protein, putative         | -0,4753 | 0,00004093 |
| TcCLB.511075.54  | hypothetical protein, conserved                                | -0,4753 | 0,002112   |
| TcCLB.510661.230 | hypothetical protein, conserved                                | -0,4754 | 7,048E-07  |
| TcCLB.507357.140 | hypothetical protein                                           | -0,4754 | 0,3341     |
| TcCLB.510725.90  | hypothetical protein, conserved                                | -0,4755 | 0,007583   |
| TcCLB.509885.60  | methyltransferase, putative                                    | -0,4756 | 0,004444   |
| TcCLB.427789.39  | hypothetical protein, conserved                                | -0,4756 | 0,0097     |
| TcCLB.508221.120 | hypothetical protein                                           | -0,4757 | 0,2317     |
| TcCLB.506883.30  | ribosome-interacting GTPase 2, putative                        | -0,4759 | 0,00001225 |
| TcCLB.504147.330 | hypothetical protein, conserved                                | -0,476  | 1,097E-11  |
| TcCLB.510687.94  | Unc104-like kinesin, putative                                  | -0,476  | 0,0001382  |
| TcCLB.508389.174 | hypothetical protein, conserved (pseudogene)                   | -0,4761 | 0,081      |
| TcCLB.507009.120 | DNA repair protein RAD2, putative                              | -0,4762 | 0,0002256  |
| TcCLB.510719.50  | hypothetical protein, conserved                                | -0,4762 | 0,04474    |
| TcCLB.511151.11  | hypothetical protein (fragment)                                | -0,4763 | 1,951E-07  |
| TcCLB.511001.140 | hypothetical protein, conserved                                | -0,4763 | 0,0001372  |
| TcCLB.510913.10  | dispersed gene family protein 1 (DGF-1), putative (fragme      | -0,4763 | 0,008084   |
| TcCLB.510359.530 | trans-sialidase, Group V, putative                             | -0,4763 | 0,06633    |
| TcCLB.508989.110 | hypothetical protein, conserved                                | -0,4765 | 0,00001192 |
| TcCLB.508051.40  | hypothetical protein, conserved                                | -0,4767 | 0,003281   |
| TcCLB.506275.20  | ATP-dependent protease subunit HsIV, putative (HsIV)           | -0,4772 | 0,0001865  |
| TcCLB.509671.160 | DNA polymerase epsilon subunit B, putative                     | -0,4774 | 0,000239   |
| TcCLB.509319.30  | hypothetical protein, conserved                                | -0,4775 | 0,00009038 |

|                  |                                                            |         |            |
|------------------|------------------------------------------------------------|---------|------------|
| TcCLB.507047.60  | hypothetical protein, conserved                            | -0,4775 | 0,001031   |
| TcCLB.506799.10  | fatty acid transporter protein-like, putative              | -0,4776 | 2,602E-06  |
| TcCLB.504839.44  | tryparedoxin peroxidase                                    | -0,4777 | 1,306E-10  |
| TcCLB.506791.60  | hypothetical protein, conserved                            | -0,4777 | 3,544E-06  |
| TcCLB.506765.80  | mucin TcMUCII, putative                                    | -0,4778 | 0,4905     |
| TcCLB.507003.24  | hypothetical protein, conserved (fragment)                 | -0,4779 | 2,935E-09  |
| TcCLB.506525.104 | AP-4 complex subunit sigma-1, putative                     | -0,4779 | 0,01216    |
| TcCLB.509715.70  | folylpolyglutamate synthase, putative (FPGS)               | -0,478  | 0,0008739  |
| TcCLB.506579.70  | hypothetical protein, conserved                            | -0,4782 | 5,704E-10  |
| TcCLB.506221.90  | hypothetical protein, conserved                            | -0,4783 | 5,784E-06  |
| TcCLB.509551.10  | protein kinase, putative                                   | -0,4783 | 0,0004822  |
| TcCLB.508781.90  | hypothetical protein, conserved                            | -0,4783 | 0,009355   |
| TcCLB.506819.10  | hypothetical protein, conserved                            | -0,4783 | 0,02925    |
| TcCLB.504105.150 | importin beta-1 subunit, putative                          | -0,4784 | 1,044E-11  |
| TcCLB.504247.34  | Transcription elongation factor 1 domain-containing protei | -0,4785 | 0,001724   |
| TcCLB.506943.69  | hypothetical protein, conserved                            | -0,4786 | 0,0003383  |
| TcCLB.511867.100 | hypothetical protein, conserved                            | -0,4788 | 0,0001562  |
| TcCLB.505171.60  | hypothetical protein, conserved                            | -0,4789 | 2,173E-06  |
| TcCLB.507019.60  | hypothetical protein, conserved                            | -0,4791 | 3,389E-06  |
| TcCLB.507019.45  | hypothetical protein                                       | -0,4791 | 0,001048   |
| TcCLB.510143.110 | hypothetical protein, conserved                            | -0,4793 | 0,000363   |
| TcCLB.508365.114 | mucin-associated surface protein (MASP, pseudogene), pu    | -0,4793 | 0,08761    |
| TcCLB.506445.100 | E2-like ubiquitin-conjugation enzyme, putative (UFC1)      | -0,4794 | 1,225E-07  |
| TcCLB.506905.10  | hypothetical protein, conserved                            | -0,4794 | 0,005763   |
| TcCLB.511127.390 | hypothetical protein, conserved                            | -0,4795 | 1,188E-10  |
| TcCLB.506625.50  | hypothetical protein                                       | -0,4796 | 0,187      |
| TcCLB.509967.100 | hypothetical protein, conserved (pseudogene)               | -0,4797 | 0,006036   |
| TcCLB.508943.40  | hypothetical protein, conserved                            | -0,4797 | 0,01913    |
| TcCLB.504109.170 | hypothetical protein, conserved                            | -0,4801 | 3,371E-07  |
| TcCLB.510007.40  | hypothetical protein, conserved                            | -0,4801 | 0,0002778  |
| TcCLB.509525.390 | mucin-associated surface protein (MASP), putative          | -0,4803 | 0,1075     |
| TcCLB.503583.24  | hypothetical protein, conserved                            | -0,4804 | 9,17E-09   |
| TcCLB.509693.90  | serine/threonine protein kinase, putative                  | -0,4804 | 0,00001388 |
| TcCLB.470399.10  | cyclophilin, putative (fragment)                           | -0,4804 | 0,001715   |
| TcCLB.511189.90  | hypothetical protein, conserved                            | -0,4805 | 3,624E-06  |
| TcCLB.506567.134 | hypothetical protein, conserved                            | -0,4805 | 0,0001608  |
| TcCLB.504131.140 | hypothetical protein, conserved                            | -0,4806 | 1,282E-09  |
| TcCLB.507207.10  | hypothetical protein, conserved                            | -0,4807 | 0,00002115 |
| TcCLB.510145.20  | cofilin/actin depolymerizing factor, putative              | -0,4809 | 2,833E-07  |
| TcCLB.504069.10  | proteasome alpha 2 subunit, putative                       | -0,4809 | 0,00007602 |
| TcCLB.457339.10  | U6 snRNA-associated Sm-like protein LSm4, putative         | -0,481  | 0,01284    |
| TcCLB.414517.9   | hypothetical protein, conserved                            | -0,481  | 0,01774    |
| TcCLB.511899.50  | Trypanosome basal body component protein (fragment) (T     | -0,4811 | 2,244E-06  |
| TcCLB.508409.190 | hypothetical protein, conserved                            | -0,4812 | 0,01638    |
| TcCLB.509393.40  | hypothetical protein                                       | -0,4813 | 1,009E-06  |

|                  |                                                           |         |            |
|------------------|-----------------------------------------------------------|---------|------------|
| TcCLB.503435.30  | hypothetical protein, conserved                           | -0,4814 | 1,068E-06  |
| TcCLB.509745.70  | hypothetical protein, conserved                           | -0,4818 | 0,00002803 |
| TcCLB.506127.50  | hypothetical protein, conserved                           | -0,4818 | 0,0001883  |
| TcCLB.508233.10  | hypothetical protein, conserved                           | -0,4818 | 0,003565   |
| TcCLB.510593.49  | kinetoplast DNA-associated protein, putative              | -0,4819 | 1,039E-06  |
| TcCLB.503775.30  | syntaxin binding protein (pseudogene), putative           | -0,4819 | 0,0116     |
| TcCLB.506297.300 | eukaryotic release factor 3, putative                     | -0,482  | 1,456E-09  |
| TcCLB.508475.20  | hypothetical protein                                      | -0,482  | 0,00000129 |
| TcCLB.506863.10  | alanyl-tRNA synthetase, putative                          | -0,4821 | 4,535E-12  |
| TcCLB.507007.60  | hypothetical protein, conserved                           | -0,4821 | 0,003327   |
| TcCLB.510551.15  | hypothetical protein                                      | -0,4821 | 0,1588     |
| TcCLB.508175.170 | hypothetical protein, conserved                           | -0,4823 | 1,991E-06  |
| TcCLB.510693.251 | mucin TcMUC (pseudogene), putative                        | -0,4823 | 0,2312     |
| TcCLB.511173.40  | mucin TcMUCII (pseudogene), putative                      | -0,4825 | 0,2805     |
| TcCLB.510181.60  | chromatin assembly factor 1 subunit B, putative           | -0,4828 | 7,235E-06  |
| TcCLB.507093.270 | guanine nucleotide releasing protein, putative            | -0,4828 | 0,0002636  |
| TcCLB.507091.20  | hypothetical protein, conserved                           | -0,4829 | 0,00009144 |
| TcCLB.507619.10  | hypothetical protein, conserved (fragment)                | -0,4829 | 0,000113   |
| TcCLB.507093.150 | hypothetical protein, conserved (pseudogene)              | -0,4831 | 2,383E-06  |
| TcCLB.509287.110 | mucin-associated surface protein (MASP), putative         | -0,4831 | 0,03333    |
| TcCLB.508153.730 | eukaryotic initiation factor 2a, putative                 | -0,4833 | 4,205E-10  |
| TcCLB.507933.10  | plectin, putative                                         | -0,4833 | 9,65E-10   |
| TcCLB.511159.20  | origin recognition complex subunit 1 (ORC1), putative     | -0,4835 | 0,005951   |
| TcCLB.508777.100 | cyclin 1 (CYC1)                                           | -0,4838 | 0,0003965  |
| TcCLB.508207.130 | hypothetical protein, conserved                           | -0,484  | 0,004726   |
| TcCLB.510877.100 | hypothetical protein, conserved                           | -0,4841 | 0,00003833 |
| TcCLB.508281.9   | dispersed gene family protein 1 (DGF-1), putative         | -0,4841 | 0,2249     |
| TcCLB.508401.70  | ATP-dependent DEAD/H RNA helicase (pseudogene), putat     | -0,4844 | 0,03222    |
| TcCLB.510275.255 | hypothetical protein                                      | -0,4844 | 0,4812     |
| TcCLB.508741.380 | hypothetical protein, conserved                           | -0,4845 | 1,732E-10  |
| TcCLB.509007.70  | hypothetical protein, conserved                           | -0,4845 | 1,343E-06  |
| TcCLB.508881.70  | DNA ligase, putative                                      | -0,4846 | 2,444E-07  |
| TcCLB.509719.60  | hypothetical protein                                      | -0,4846 | 0,01933    |
| TcCLB.510029.80  | hypothetical protein, conserved                           | -0,4847 | 3,258E-06  |
| TcCLB.508909.320 | hypothetical protein                                      | -0,4847 | 0,00001817 |
| TcCLB.508307.190 | hypothetical protein, conserved                           | -0,4848 | 0,003799   |
| TcCLB.511559.10  | Present in the outer mitochondrial membrane proteome 1    | -0,4848 | 0,3772     |
| TcCLB.506495.30  | retrotransposon hot spot protein (RHS, pseudogene), putat | -0,4849 | 0,01556    |
| TcCLB.509683.110 | nucleobase transporter, putative                          | -0,485  | 0,0004212  |
| TcCLB.506815.40  | mitochondrial RNA binding complex 1 subunit, putative     | -0,485  | 0,004708   |
| TcCLB.508277.380 | hypothetical protein, conserved                           | -0,4851 | 5,795E-10  |
| TcCLB.509443.48  | hypothetical protein, conserved                           | -0,4851 | 0,02025    |
| TcCLB.506225.30  | hypothetical protein, conserved (pseudogene)              | -0,4852 | 0,1052     |
| TcCLB.505025.90  | mucin-associated surface protein (MASP), putative         | -0,4852 | 0,3075     |
| TcCLB.507093.210 | myosin heavy chain, putative                              | -0,4853 | 1,907E-09  |

|                  |                                                            |         |            |
|------------------|------------------------------------------------------------|---------|------------|
| TcCLB.508075.7   | hypothetical protein, conserved                            | -0,4853 | 0,01193    |
| TcCLB.506367.10  | isovaleryl-coA dehydrogenase, putative (fragment)          | -0,4855 | 0,04044    |
| TcCLB.511233.140 | trans-sialidase, Group V, putative                         | -0,4855 | 0,4774     |
| TcCLB.511741.20  | hypothetical protein, conserved                            | -0,4859 | 0,0001031  |
| TcCLB.510071.30  | UDP-Gal or UDP-GlcNAc-dependent glycosyltransferase, pu    | -0,4859 | 0,07053    |
| TcCLB.506499.110 | mucin TcMUCII (pseudogene), putative                       | -0,4859 | 0,3015     |
| TcCLB.509039.10  | hypothetical protein, conserved                            | -0,4861 | 2,914E-08  |
| TcCLB.510943.23  | hypothetical protein, conserved                            | -0,4862 | 0,0002525  |
| TcCLB.511545.190 | GPI transamidase component Tta1, putative (TTA1)           | -0,4862 | 0,002293   |
| TcCLB.503891.70  | ribonuclease HII, putative                                 | -0,4863 | 0,0002707  |
| TcCLB.509287.5   | hypothetical protein, conserved (pseudogene)               | -0,4863 | 0,0616     |
| TcCLB.506501.280 | mucin TcMUCII, putative                                    | -0,4863 | 0,4969     |
| TcCLB.511483.10  | hypothetical protein                                       | -0,4864 | 0,00009154 |
| TcCLB.510693.320 | mucin-associated surface protein (MASP), putative          | -0,4864 | 0,1222     |
| TcCLB.508461.370 | hypothetical protein, conserved                            | -0,4865 | 0,00002463 |
| TcCLB.506887.10  | trans-sialidase, putative                                  | -0,4865 | 0,2887     |
| TcCLB.505983.40  | hypothetical protein, conserved                            | -0,4866 | 7,294E-10  |
| TcCLB.506327.10  | proteasome subunit alpha type-1, putative (fragment) (PSI) | -0,4868 | 0,001469   |
| TcCLB.507739.80  | hypothetical protein, conserved                            | -0,4869 | 0,0000302  |
| TcCLB.507029.50  | hypothetical protein, conserved                            | -0,4869 | 0,04449    |
| TcCLB.511577.150 | hypothetical protein, conserved                            | -0,487  | 0,00009742 |
| TcCLB.507031.70  | hypothetical protein, conserved                            | -0,487  | 0,0009438  |
| TcCLB.511907.190 | hypothetical protein                                       | -0,4871 | 2,921E-06  |
| TcCLB.508505.40  | hypothetical protein, conserved                            | -0,4871 | 0,0000932  |
| TcCLB.508707.140 | phosphatidate cytidyltransferase-like protein, putative    | -0,4872 | 0,0005376  |
| TcCLB.507357.10  | surface protease GP63, putative                            | -0,4872 | 0,21       |
| TcCLB.506679.50  | pre-mRNA splicing factor ATP-dependent RNA helicase, pu    | -0,4873 | 2,43E-08   |
| TcCLB.504507.5   | trypanothione reductase, putative (fragment)               | -0,4873 | 0,0001484  |
| TcCLB.507943.50  | hypothetical protein, conserved                            | -0,4873 | 0,009491   |
| TcCLB.507519.167 | hypothetical protein                                       | -0,4873 | 0,037      |
| TcCLB.508461.340 | hypothetical protein, conserved                            | -0,4874 | 1,042E-08  |
| TcCLB.511773.40  | hypothetical protein, conserved                            | -0,4874 | 0,1282     |
| TcCLB.507951.15  | hypothetical protein, conserved (fragment)                 | -0,4876 | 1,41E-07   |
| TcCLB.510121.140 | hypothetical protein, conserved                            | -0,4876 | 0,00003878 |
| TcCLB.510053.79  | FG-GAP repeat protein, putative                            | -0,4876 | 0,02059    |
| TcCLB.506127.90  | hypothetical protein, conserved                            | -0,4877 | 3,938E-11  |
| TcCLB.506533.34  | phosphatidylinositol kinase related protein, putative      | -0,4877 | 6,192E-10  |
| TcCLB.508479.340 | succinyl-CoA synthetase alpha subunit, putative            | -0,4879 | 7,749E-12  |
| TcCLB.510255.20  | hypothetical protein, conserved                            | -0,4885 | 0,001826   |
| TcCLB.419417.19  | hypothetical protein, conserved                            | -0,4885 | 0,02082    |
| TcCLB.509399.130 | hypothetical protein, conserved                            | -0,4886 | 0,0001255  |
| TcCLB.508559.20  | trans-sialidase (pseudogene), putative                     | -0,4886 | 0,0002304  |
| TcCLB.507389.60  | chaperone DNAJ protein, putative                           | -0,4886 | 0,01469    |
| TcCLB.511911.102 | hypothetical protein, conserved                            | -0,4887 | 0,001679   |
| TcCLB.507929.30  | hypothetical protein, conserved                            | -0,4887 | 0,01148    |

|                  |                                                            |         |            |
|------------------|------------------------------------------------------------|---------|------------|
| TcCLB.508307.80  | mitochondrial RNA binding complex 1 subunit, putative      | -0,4888 | 3,309E-06  |
| TcCLB.506681.60  | hypothetical protein, conserved                            | -0,4888 | 3,465E-06  |
| TcCLB.508541.200 | hypothetical protein, conserved                            | -0,4888 | 0,00736    |
| TcCLB.503493.20  | hypothetical protein, conserved                            | -0,4889 | 0,007788   |
| TcCLB.511903.20  | hypothetical protein, conserved                            | -0,4891 | 0,01243    |
| TcCLB.511753.9   | hypothetical protein, conserved                            | -0,4893 | 0,01046    |
| TcCLB.510833.40  | trans-sialidase (pseudogene), putative                     | -0,4893 | 0,07231    |
| TcCLB.508993.20  | homocysteine S-methyltransferase, putative                 | -0,4894 | 0,0005704  |
| TcCLB.510303.90  | hypothetical protein, conserved                            | -0,4895 | 0,0007701  |
| TcCLB.511501.30  | ABC transporter, putative                                  | -0,4897 | 0,001284   |
| TcCLB.507017.50  | polynucleotide kinase 3'-phosphatase, putative             | -0,4898 | 0,0003626  |
| TcCLB.511589.50  | cyclophilin-like protein, putative                         | -0,4898 | 0,000462   |
| TcCLB.508325.101 | hypothetical protein, conserved                            | -0,49   | 0,2217     |
| TcCLB.504131.10  | hypothetical protein, conserved (pseudogene)               | -0,4902 | 0,00005285 |
| TcCLB.503693.11  | hypothetical protein, conserved (fragment)                 | -0,4902 | 0,07837    |
| TcCLB.506811.50  | hypothetical protein, conserved                            | -0,4903 | 0,2118     |
| TcCLB.508601.130 | Elongation factor G 2, mitochondrial, putative (EF-G2)     | -0,4905 | 1,588E-06  |
| TcCLB.511269.70  | cysteine peptidase, Clan CA, family C2, putative           | -0,4905 | 0,003451   |
| TcCLB.508479.86  | ATP-dependent DEAD/H RNA helicase (pseudogene), putat      | -0,4905 | 0,09211    |
| TcCLB.510257.50  | hypothetical protein, conserved                            | -0,4906 | 0,003681   |
| TcCLB.508815.4   | RNA polymerase I, putative                                 | -0,4907 | 0,08445    |
| TcCLB.504153.290 | hypothetical protein, conserved                            | -0,4908 | 0,00003694 |
| TcCLB.506469.139 | hypothetical protein, conserved                            | -0,4908 | 0,03358    |
| TcCLB.508593.50  | hypothetical protein, conserved                            | -0,491  | 0,00001838 |
| TcCLB.511269.60  | Vacuolar protein sorting-associated protein 16 homolog, pi | -0,491  | 0,0001699  |
| TcCLB.506367.120 | hypothetical protein, conserved                            | -0,4911 | 1,539E-07  |
| TcCLB.506459.215 | hypothetical protein, conserved (pseudogene)               | -0,4911 | 0,2672     |
| TcCLB.511675.30  | retrotransposon hot spot protein (RHS, pseudogene), putat  | -0,4912 | 0,3321     |
| TcCLB.510421.264 | hypothetical protein, conserved                            | -0,4913 | 0,02175    |
| TcCLB.508401.90  | N-acetyltransferase complex ARD1 subunit (pseudogene),     | -0,4913 | 0,05114    |
| TcCLB.508153.940 | hypothetical protein, conserved (pseudogene)               | -0,4914 | 1,731E-09  |
| TcCLB.506501.110 | mucin-associated surface protein (MASP), putative          | -0,4916 | 0,2567     |
| TcCLB.508231.70  | hypothetical protein, conserved                            | -0,4918 | 0,0007659  |
| TcCLB.509215.16  | GlcNAc-PI synthesis protein (GPI3)                         | -0,4918 | 0,00253    |
| TcCLB.503835.5   | rac serine threonine protein kinase, putative              | -0,4918 | 0,1372     |
| TcCLB.511289.119 | C-terminal motor kinesin, putative (fragment)              | -0,4919 | 0,0008737  |
| TcCLB.503897.100 | hypothetical protein, conserved                            | -0,4921 | 0,00001031 |
| TcCLB.507959.110 | mucin-associated surface protein (MASP), putative          | -0,4922 | 0,2761     |
| TcCLB.511237.20  | hypothetical protein, conserved                            | -0,4923 | 0,0001069  |
| TcCLB.511725.110 | hypothetical protein, conserved                            | -0,4923 | 0,006544   |
| TcCLB.511797.220 | dispersed gene family protein 1 (DGF-1), putative          | -0,4924 | 0,09642    |
| TcCLB.507639.50  | tRNA pseudouridine synthase A, putative                    | -0,4928 | 0,0004174  |
| TcCLB.508405.30  | Suppressor of G2 allele of SKP1, putative                  | -0,4928 | 0,001334   |
| TcCLB.509557.10  | hypothetical protein                                       | -0,4929 | 0,0007501  |
| TcCLB.510143.10  | hypothetical protein, conserved                            | -0,4929 | 0,003097   |



|                  |                                                                |         |            |
|------------------|----------------------------------------------------------------|---------|------------|
| TcCLB.511589.230 | eukaryotic translation initiation factor 3 subunit 2, putative | -0,493  | 7,192E-07  |
| TcCLB.503965.10  | hypothetical protein, conserved                                | -0,493  | 0,001467   |
| TcCLB.503557.20  | ankyrin repeat protein, putative                               | -0,493  | 0,0185     |
| TcCLB.510799.80  | hypothetical protein, conserved                                | -0,4932 | 0,00004953 |
| TcCLB.510187.230 | formin, putative                                               | -0,4932 | 0,00005498 |
| TcCLB.508951.10  | hypothetical protein, conserved                                | -0,4932 | 0,00006359 |
| TcCLB.508357.20  | hypothetical protein, conserved                                | -0,4932 | 0,01894    |
| TcCLB.421173.14  | trans-sialidase, putative                                      | -0,4932 | 0,409      |
| TcCLB.506457.30  | hypoxanthine-guanine phosphoribosyltransferase, putative       | -0,4933 | 0,01571    |
| TcCLB.511353.69  | oxidoreductase-protein, putative                               | -0,4933 | 0,02815    |
| TcCLB.510719.70  | bromodomain-containing protein 3 (BDF3)                        | -0,4934 | 0,00006487 |
| TcCLB.511245.90  | hypothetical protein, conserved                                | -0,4934 | 0,0008462  |
| TcCLB.507895.140 | hypothetical protein                                           | -0,4935 | 2,974E-06  |
| TcCLB.508215.10  | hypothetical protein, conserved                                | -0,4935 | 0,0001856  |
| TcCLB.507739.90  | hypothetical protein, conserved                                | -0,4937 | 0,0005774  |
| TcCLB.508693.170 | hypothetical protein, conserved                                | -0,4937 | 0,001368   |
| TcCLB.511857.30  | glycosyl transferase-like protein, putative                    | -0,4938 | 0,004394   |
| TcCLB.510317.34  | unspecified product                                            | -0,4939 | 0,09491    |
| TcCLB.508299.50  | hypothetical protein, conserved                                | -0,4941 | 3,284E-10  |
| TcCLB.511293.90  | hypothetical protein, conserved                                | -0,4941 | 0,0002083  |
| TcCLB.510609.34  | hypothetical protein, conserved                                | -0,4941 | 0,0003967  |
| TcCLB.507775.30  | hypothetical protein, conserved                                | -0,4941 | 0,0006515  |
| TcCLB.511283.230 | hypothetical protein, conserved                                | -0,4942 | 9,789E-10  |
| TcCLB.503703.70  | Mitochondrial SSU ribosomal protein, putative                  | -0,4942 | 3,044E-07  |
| TcCLB.510667.60  | peptidyl-prolyl cis-trans isomerase (cyclophilin), putative    | -0,4942 | 0,001403   |
| TcCLB.511183.230 | trans-sialidase, Group V, putative                             | -0,4942 | 0,2175     |
| TcCLB.504215.40  | actin-related protein 2/3 complex subunit 1, putative (ARP)    | -0,4943 | 0,0003404  |
| TcCLB.436761.10  | hypothetical protein, conserved                                | -0,4945 | 0,008627   |
| TcCLB.510187.10  | hypothetical protein, conserved                                | -0,4945 | 0,1057     |
| TcCLB.504985.10  | hypothetical protein                                           | -0,4945 | 0,1844     |
| TcCLB.510339.70  | hypothetical protein, conserved                                | -0,4946 | 0,00002073 |
| TcCLB.508739.50  | hypothetical protein                                           | -0,4947 | 0,001287   |
| TcCLB.511633.20  | hypothetical protein, conserved                                | -0,4948 | 0,0001814  |
| TcCLB.505171.100 | hypothetical protein, conserved                                | -0,4948 | 0,005591   |
| TcCLB.508583.10  | hypothetical protein, conserved                                | -0,4949 | 0,00379    |
| TcCLB.505977.40  | inositol/phosphatidylinositol phosphatase (pseudogene), p      | -0,495  | 4,886E-10  |
| TcCLB.510609.20  | hypothetical protein, conserved                                | -0,4953 | 2,801E-06  |
| TcCLB.503425.20  | monothiol glutaredoxin, putative                               | -0,4954 | 0,00009671 |
| TcCLB.509429.59  | hypothetical protein, conserved                                | -0,4955 | 1,107E-06  |
| TcCLB.506435.230 | hypothetical protein, conserved (pseudogene)                   | -0,4955 | 0,001884   |
| TcCLB.511043.10  | hypothetical protein, conserved                                | -0,4956 | 2,119E-08  |
| TcCLB.509081.80  | hypothetical protein, conserved (pseudogene)                   | -0,4956 | 0,2543     |
| TcCLB.511277.483 | hypothetical protein, conserved                                | -0,4957 | 0,003388   |
| TcCLB.506177.20  | lectin, putative                                               | -0,4959 | 0,00000729 |
| TcCLB.508805.10  | pre-mRNA splicing factor ATP-dependent RNA helicase (ps        | -0,4959 | 0,000102   |

|                  |                                                           |         |            |
|------------------|-----------------------------------------------------------|---------|------------|
| TcCLB.509643.50  | hypothetical protein, conserved                           | -0,4959 | 0,0001044  |
| TcCLB.506167.40  | proteasome subunit alpha type-1, putative (PSA1)          | -0,4959 | 0,0001436  |
| TcCLB.511173.230 | trans-sialidase (pseudogene), putative                    | -0,4959 | 0,1094     |
| TcCLB.507017.120 | ubiquitin hydrolase, putative                             | -0,496  | 3,347E-09  |
| TcCLB.511217.80  | hypothetical protein, conserved                           | -0,496  | 0,06326    |
| TcCLB.506925.190 | hypothetical protein, conserved                           | -0,4962 | 0,0002914  |
| TcCLB.506679.10  | hypothetical protein, conserved                           | -0,4962 | 0,01717    |
| TcCLB.506845.21  | N-acetyltransferase complex ARD1 subunit (pseudogene),    | -0,4962 | 0,4052     |
| TcCLB.508441.40  | hypothetical protein, conserved                           | -0,4963 | 7,143E-06  |
| TcCLB.504021.30  | hypothetical protein, conserved                           | -0,4965 | 1,509E-07  |
| TcCLB.508613.20  | hypothetical protein, conserved                           | -0,4967 | 0,0006638  |
| TcCLB.506349.83  | retrotransposon hot spot protein (RHS, pseudogene), putat | -0,4968 | 0,007583   |
| TcCLB.511563.30  | retrotransposon hot spot protein (RHS, pseudogene), putat | -0,4969 | 0,3382     |
| TcCLB.510833.10  | trans-sialidase, putative                                 | -0,4973 | 0,2901     |
| TcCLB.507993.140 | RNA-binding protein 29, putative (RBP29)                  | -0,4975 | 8,964E-07  |
| TcCLB.508039.50  | dispersed gene family protein 1 (DGF-1, pseudogene), puta | -0,4976 | 0,02563    |
| TcCLB.508277.90  | hypothetical protein, conserved                           | -0,4977 | 0,0006     |
| TcCLB.507011.100 | hypothetical protein, conserved                           | -0,4978 | 0,0001541  |
| TcCLB.507993.350 | surface protease GP63, putative                           | -0,4978 | 0,04268    |
| TcCLB.508247.140 | hypothetical protein                                      | -0,4979 | 0,1202     |
| TcCLB.509671.50  | hypothetical protein, conserved                           | -0,4981 | 0,00334    |
| TcCLB.511287.160 | hypothetical protein, conserved                           | -0,4983 | 2,448E-06  |
| TcCLB.508181.80  | hypothetical protein, conserved                           | -0,4983 | 8,449E-06  |
| TcCLB.510025.205 | hypothetical protein, conserved (pseudogene)              | -0,4984 | 0,2458     |
| TcCLB.505943.40  | hypothetical protein, conserved                           | -0,4985 | 6,013E-08  |
| TcCLB.511445.130 | Mitochondrial SSU ribosomal protein, putative             | -0,4985 | 4,479E-07  |
| TcCLB.503797.7   | hypothetical protein, conserved (pseudogene)              | -0,4985 | 0,0001435  |
| TcCLB.504071.80  | nuclear cap binding protein, putative                     | -0,4985 | 0,01162    |
| TcCLB.511295.70  | hypothetical protein, conserved (fragment)                | -0,4985 | 0,2398     |
| TcCLB.508307.150 | hypothetical protein, conserved                           | -0,4986 | 0,00004408 |
| TcCLB.509615.60  | hypothetical protein                                      | -0,4988 | 0,3732     |
| TcCLB.511727.90  | vacuolar proton-ATPase-like protein, putative             | -0,499  | 5,352E-10  |
| TcCLB.507957.29  | surface protease GP63 (pseudogene), putative              | -0,499  | 0,4583     |
| TcCLB.506375.100 | hypothetical protein                                      | -0,4992 | 0,0007465  |
| TcCLB.510261.31  | mucin-associated surface protein (MASP, pseudogene), pu   | -0,4992 | 0,1821     |
| TcCLB.507033.10  | hypothetical protein, conserved                           | -0,4997 | 4,164E-09  |
| TcCLB.506539.21  | hypothetical protein, conserved (pseudogene)              | -0,4997 | 0,1003     |
| TcCLB.504033.90  | mitochondrial carrier protein, putative                   | -0,4998 | 2,91E-07   |
| TcCLB.510667.14  | membrane transporter protein, putative                    | -0,4998 | 0,0001273  |
| TcCLB.506613.130 | dispersed gene family protein 1 (DGF-1), putative         | -0,4998 | 0,03511    |
| TcCLB.511511.70  | hypothetical protein, conserved                           | -0,4999 | 5,893E-08  |
| TcCLB.508951.40  | acyl-CoA dehydrogenase, putative                          | -0,4999 | 0,002297   |
| TcCLB.507757.50  | serine/threonine-protein phosphatase PP1, putative        | -0,5002 | 2,946E-06  |
| TcCLB.511921.130 | hypothetical protein, conserved (pseudogene)              | -0,5003 | 0,0897     |
| TcCLB.507951.270 | LETM1 and EF-hand domain-containing protein 1, putative   | -0,5008 | 4,538E-07  |

|                  |                                                             |         |            |
|------------------|-------------------------------------------------------------|---------|------------|
| TcCLB.511355.14  | cation transporter, putative                                | -0,5009 | 0,00000821 |
| TcCLB.507093.190 | hypothetical protein, conserved                             | -0,5012 | 0,003345   |
| TcCLB.506737.100 | hypothetical protein, conserved                             | -0,5013 | 0,0002064  |
| TcCLB.506793.80  | ATP-dependent RNA helicase, putative                        | -0,5015 | 0,00002174 |
| TcCLB.508397.40  | succinate dehydrogenase subunit                             | -0,5016 | 0,0001227  |
| TcCLB.410961.10  | phosphatidylinositol kinase related protein, putative       | -0,5017 | 0,1096     |
| TcCLB.510543.210 | retrotransposon hot spot protein (RHS, pseudogene), putat   | -0,5018 | 0,07376    |
| TcCLB.509525.40  | hypothetical protein, conserved                             | -0,5018 | 0,5198     |
| TcCLB.505967.19  | dispersed gene family protein 1 (DGF-1), putative (fragme   | -0,502  | 0,09389    |
| TcCLB.510575.10  | hypothetical protein                                        | -0,5024 | 0,0008626  |
| TcCLB.510075.50  | hypothetical protein, conserved                             | -0,5025 | 3,732E-07  |
| TcCLB.509525.10  | mucin-associated surface protein (MASP, pseudogene), pu     | -0,5026 | 0,2629     |
| TcCLB.504787.54  | mucin-associated surface protein (MASP, pseudogene), pu     | -0,5027 | 0,03333    |
| TcCLB.511127.140 | DNA replication licensing factor MCM4, putative             | -0,5029 | 0,00001699 |
| TcCLB.510361.110 | mucin-associated surface protein (MASP), putative           | -0,5029 | 0,1525     |
| TcCLB.506733.100 | hypothetical protein, conserved                             | -0,503  | 2,347E-06  |
| TcCLB.507857.80  | hypothetical protein, conserved (pseudogene)                | -0,503  | 0,00003398 |
| TcCLB.511751.166 | hypothetical protein, conserved                             | -0,503  | 0,0001214  |
| TcCLB.509011.90  | lipase, putative                                            | -0,5031 | 0,004488   |
| TcCLB.506933.107 | hypothetical protein, conserved                             | -0,5035 | 0,0007293  |
| TcCLB.507509.60  | hypothetical protein, conserved                             | -0,5037 | 0,00001994 |
| TcCLB.504239.171 | mucin TcMUCII, putative                                     | -0,5038 | 0,2911     |
| TcCLB.508573.120 | dispersed gene family protein 1 (DGF-1), putative           | -0,504  | 0,09943    |
| TcCLB.510553.40  | trans-sialidase, Group V, putative                          | -0,5042 | 0,09393    |
| TcCLB.504827.21  | hypothetical protein, conserved (fragment)                  | -0,5043 | 3,968E-08  |
| TcCLB.509729.10  | hypothetical protein, conserved                             | -0,5043 | 5,707E-06  |
| TcCLB.508255.10  | trans-sialidase (pseudogene), putative                      | -0,5043 | 0,005556   |
| TcCLB.510013.59  | trans-sialidase (pseudogene), putative                      | -0,5043 | 0,3045     |
| TcCLB.443683.9   | DNA-directed rna polymerase I largest subunit, putative (fr | -0,5044 | 0,001908   |
| TcCLB.503583.20  | hypothetical protein, conserved                             | -0,5045 | 0,0007751  |
| TcCLB.507711.80  | hypothetical protein, conserved                             | -0,5047 | 0,0004412  |
| TcCLB.505317.9   | trans-sialidase, putative (fragment)                        | -0,5047 | 0,003351   |
| TcCLB.508153.190 | kinesin, putative                                           | -0,5051 | 3,452E-06  |
| TcCLB.508637.69  | hypothetical protein, conserved                             | -0,5051 | 0,001377   |
| TcCLB.507975.80  | hypothetical protein, conserved                             | -0,5052 | 3,322E-09  |
| TcCLB.507895.164 | hypothetical protein, conserved                             | -0,5052 | 0,0001164  |
| TcCLB.510691.80  | hypothetical protein, conserved                             | -0,5054 | 0,003238   |
| TcCLB.509247.30  | hypothetical protein, conserved                             | -0,5055 | 1,956E-11  |
| TcCLB.504103.50  | hypothetical protein, conserved                             | -0,5056 | 0,00007054 |
| TcCLB.511435.49  | phosphatidylinositol 3-kinase, putative                     | -0,5057 | 0,07527    |
| TcCLB.511525.11  | hypothetical protein, conserved (fragment)                  | -0,5057 | 0,1117     |
| TcCLB.511751.180 | pseudouridine synthase A-like protein, putative             | -0,5058 | 0,00007406 |
| TcCLB.508405.100 | hypothetical protein, conserved                             | -0,5058 | 0,001329   |
| TcCLB.506605.50  | hypothetical protein, conserved                             | -0,5059 | 3,639E-06  |
| TcCLB.419043.10  | hypothetical protein, conserved                             | -0,5059 | 0,005886   |

|                  |                                                               |         |            |
|------------------|---------------------------------------------------------------|---------|------------|
| TcCLB.509609.19  | DNA repair and recombination helicase protein PIF7, putative  | -0,5059 | 0,007621   |
| TcCLB.508771.55  | hypothetical protein, conserved (pseudogene)                  | -0,506  | 0,002898   |
| TcCLB.507907.50  | hypothetical protein, conserved                               | -0,5063 | 1,196E-12  |
| TcCLB.508261.70  | mucin-associated surface protein (MASP, pseudogene), putative | -0,5063 | 0,1492     |
| TcCLB.508479.260 | hypothetical protein, conserved                               | -0,5064 | 0,00002149 |
| TcCLB.511589.120 | DNA topoisomerase III, putative                               | -0,5064 | 0,00008019 |
| TcCLB.511435.10  | WD40 repeat-containing protein                                | -0,5065 | 1,429E-06  |
| TcCLB.510901.150 | proteasome regulatory non-ATPase subunit 2, putative          | -0,5066 | 5,262E-11  |
| TcCLB.510575.50  | hypothetical protein, conserved                               | -0,5066 | 0,04252    |
| TcCLB.506265.180 | hypothetical protein, conserved                               | -0,507  | 0,01082    |
| TcCLB.508909.60  | hypothetical protein, conserved                               | -0,5071 | 0,0006118  |
| TcCLB.503973.20  | trans-sialidase (pseudogene), putative                        | -0,5071 | 0,03913    |
| TcCLB.507625.70  | hypothetical protein, conserved                               | -0,5072 | 1,716E-06  |
| TcCLB.469435.10  | hypothetical protein, conserved                               | -0,5072 | 0,00252    |
| TcCLB.503777.4   | hypothetical protein, conserved                               | -0,5072 | 0,08401    |
| TcCLB.505809.10  | dispersed gene family protein 1 (DGF-1, pseudogene), putative | -0,5073 | 0,4243     |
| TcCLB.511439.100 | p-nitrophenylphosphatase, putative                            | -0,5075 | 0,00267    |
| TcCLB.506739.209 | hypothetical protein, conserved                               | -0,5076 | 0,001061   |
| TcCLB.504247.70  | AATF protein, putative (pseudogene)                           | -0,5077 | 0,0003792  |
| TcCLB.505999.180 | Non cytoplasmic domain containing protein, conserved          | -0,5078 | 0,00006584 |
| TcCLB.511499.59  | small nuclear ribonucleoprotein Sm-E, putative                | -0,5078 | 0,003167   |
| TcCLB.503981.80  | hypothetical protein, conserved                               | -0,508  | 5,481E-11  |
| TcCLB.507041.132 | hypothetical protein (fragment)                               | -0,508  | 0,04071    |
| TcCLB.511063.40  | trans-sialidase, Group V, putative                            | -0,5081 | 0,2276     |
| TcCLB.504055.81  | ubiquitin-protein ligase, putative                            | -0,5083 | 0,0002311  |
| TcCLB.508355.10  | hypothetical protein, conserved                               | -0,5085 | 0,0003065  |
| TcCLB.508231.120 | trans-sialidase (pseudogene), putative                        | -0,5085 | 0,3404     |
| TcCLB.508357.80  | cation transporter protein, putative                          | -0,5086 | 0,00005923 |
| TcCLB.506459.270 | hypothetical protein, conserved                               | -0,5088 | 2,297E-09  |
| TcCLB.511181.110 | hypothetical protein, conserved                               | -0,5089 | 2,498E-07  |
| TcCLB.511727.160 | hypothetical protein, conserved                               | -0,5091 | 1,493E-11  |
| TcCLB.407477.60  | hypothetical protein, conserved                               | -0,5091 | 0,0006833  |
| TcCLB.506479.10  | hypothetical protein, conserved                               | -0,5092 | 0,0001138  |
| TcCLB.511415.40  | dispersed gene family protein 1 (DGF-1), putative             | -0,5092 | 0,0008318  |
| TcCLB.507023.120 | aldehyde dehydrogenase family, putative                       | -0,5096 | 0,0001688  |
| TcCLB.433677.19  | hypothetical protein, conserved                               | -0,5097 | 0,04183    |
| TcCLB.510029.90  | hypothetical protein, conserved                               | -0,5098 | 8,152E-06  |
| TcCLB.509167.90  | hypothetical protein, conserved                               | -0,5098 | 0,0001829  |
| TcCLB.507509.30  | RNA polymerase-like protein, putative                         | -0,5098 | 0,003079   |
| TcCLB.508873.40  | mucin TcMUCII (pseudogene), putative                          | -0,5098 | 0,1543     |
| TcCLB.510295.30  | RNA editing complex protein MP18, putative                    | -0,5103 | 0,00003248 |
| TcCLB.508181.130 | peter pan protein, putative                                   | -0,5103 | 0,00004751 |
| TcCLB.511289.30  | metallo-peptidase, Clan MG, Family M24                        | -0,5104 | 2,197E-10  |
| TcCLB.510329.110 | hypothetical protein                                          | -0,5105 | 6,752E-07  |
| TcCLB.508741.210 | hypothetical protein                                          | -0,5106 | 6,432E-12  |

|                  |                                                           |         |            |
|------------------|-----------------------------------------------------------|---------|------------|
| TcCLB.506739.200 | protein phosphatase 2C, putative                          | -0,5108 | 3,801E-11  |
| TcCLB.418113.9   | dispersed gene family protein 1 (DGF-1), putative         | -0,5109 | 0,3693     |
| TcCLB.503833.10  | hypothetical protein, conserved                           | -0,511  | 9,159E-07  |
| TcCLB.507017.170 | hypothetical protein, conserved                           | -0,5111 | 0,01047    |
| TcCLB.506405.90  | hypothetical protein, conserved                           | -0,5114 | 0,001215   |
| TcCLB.507027.30  | hypothetical protein, conserved (pseudogene)              | -0,5116 | 2,975E-09  |
| TcCLB.511021.51  | hypothetical protein, conserved                           | -0,5117 | 0,004545   |
| TcCLB.510087.100 | GINS complex subunit Psf3, putative                       | -0,5118 | 0,03439    |
| TcCLB.508479.200 | palmitoyl acyltransferase 10, putative                    | -0,512  | 4,742E-07  |
| TcCLB.510275.190 | mucin-associated surface protein (MASP), putative         | -0,512  | 0,246      |
| TcCLB.508153.920 | choline/ethanolamine phosphotransferase, putative         | -0,5121 | 4,831E-06  |
| TcCLB.508593.110 | arginine N-methyltransferase, putative                    | -0,5121 | 0,0000475  |
| TcCLB.510089.39  | CAAX amino terminal protease, putative                    | -0,5122 | 0,00482    |
| TcCLB.503655.40  | surface protease GP63 (pseudogene), putative              | -0,5122 | 0,05763    |
| TcCLB.509553.30  | ribonuclease mar1, putative                               | -0,5123 | 0,03447    |
| TcCLB.506493.80  | DNA topoisomerase IA, putative                            | -0,5124 | 1,146E-09  |
| TcCLB.511867.170 | hypothetical protein, conserved                           | -0,5124 | 2,116E-06  |
| TcCLB.506733.60  | N(2), N(2)-dimethylguanosine tRNA methyltransferase, pu   | -0,5124 | 0,00001215 |
| TcCLB.511303.130 | hypothetical protein                                      | -0,5125 | 0,00008073 |
| TcCLB.504067.10  | dispersed gene family protein 1 (DGF-1), putative         | -0,5125 | 0,1742     |
| TcCLB.510243.128 | hypothetical protein, conserved                           | -0,5127 | 0,03563    |
| TcCLB.509229.30  | hypothetical protein, conserved                           | -0,5129 | 0,02244    |
| TcCLB.511589.60  | hypothetical protein, conserved                           | -0,513  | 0,01684    |
| TcCLB.509745.60  | telomerase reverse transcriptase, putative (TERT)         | -0,5133 | 7,852E-06  |
| TcCLB.506413.80  | cyclophilin, putative                                     | -0,5134 | 0,0005608  |
| TcCLB.511911.71  | hypothetical protein, conserved                           | -0,5135 | 0,2388     |
| TcCLB.511153.124 | hypothetical protein, conserved                           | -0,5136 | 0,005442   |
| TcCLB.506671.30  | mucin-associated surface protein (MASP, pseudogene), pu   | -0,5136 | 0,02107    |
| TcCLB.511801.20  | hypothetical protein, conserved                           | -0,5137 | 0,0003805  |
| TcCLB.506247.200 | adaptin complex 1 subunit, putative                       | -0,5138 | 5,769E-11  |
| TcCLB.507037.10  | proteasome regulatory non-ATPase subunit 7 (pseudogene)   | -0,5142 | 0,00003295 |
| TcCLB.509611.140 | hypothetical protein, conserved                           | -0,5143 | 0,00004436 |
| TcCLB.511127.30  | hypothetical protein, conserved                           | -0,5144 | 0,0006634  |
| TcCLB.507005.40  | zinc finger protein, putative                             | -0,5144 | 0,0006651  |
| TcCLB.506711.4   | peptide chain release factor 1, putative (fragment)       | -0,5144 | 0,01664    |
| TcCLB.505555.61  | cytoplasmic l-asparaginase i-like protein, putative       | -0,5144 | 0,02262    |
| TcCLB.510745.30  | hypothetical protein, conserved                           | -0,5149 | 0,03787    |
| TcCLB.511733.20  | hypothetical protein, conserved                           | -0,5152 | 6,579E-06  |
| TcCLB.506231.40  | retrotransposon hot spot protein (RHS, pseudogene), putat | -0,5152 | 0,002534   |
| TcCLB.508489.10  | hypothetical protein, conserved                           | -0,5155 | 0,001151   |
| TcCLB.510593.40  | kinetoplastid kinetochore protein 8, putative (kkt8)      | -0,5156 | 0,00004495 |
| TcCLB.507155.9   | dispersed gene family protein 1 (DGF-1, pseudogene), puta | -0,5156 | 0,02677    |
| TcCLB.506247.260 | mitochondrial carrier protein, putative                   | -0,5157 | 0,008993   |
| TcCLB.504239.161 | mucin-associated surface protein (MASP, pseudogene), pu   | -0,5159 | 0,2055     |
| TcCLB.509073.10  | hypothetical protein, conserved                           | -0,5161 | 9,061E-06  |

|                  |                                                             |         |            |
|------------------|-------------------------------------------------------------|---------|------------|
| TcCLB.509875.110 | hypothetical protein                                        | -0,5161 | 0,2894     |
| TcCLB.509525.260 | hypothetical protein                                        | -0,5163 | 0,03909    |
| TcCLB.506321.330 | hypothetical protein, conserved                             | -0,5164 | 0,00001266 |
| TcCLB.511565.15  | hypothetical protein                                        | -0,5164 | 0,2287     |
| TcCLB.509895.80  | ATP-dependent zinc metallopeptidase (pseudogene), putat     | -0,5165 | 3,546E-07  |
| TcCLB.510823.20  | conserved protein, unknown function                         | -0,5166 | 3,544E-06  |
| TcCLB.511517.80  | replication factor C, subunit 2, putative                   | -0,5168 | 0,0000419  |
| TcCLB.510817.10  | protein kinase, putative                                    | -0,5168 | 0,09933    |
| TcCLB.507997.60  | hypothetical protein, conserved                             | -0,5169 | 4,225E-06  |
| TcCLB.506739.40  | hypothetical protein, conserved                             | -0,5169 | 0,00003535 |
| TcCLB.507895.110 | hypothetical protein, conserved                             | -0,5169 | 0,0001598  |
| TcCLB.509125.10  | mannosyltransferase-like protein, putative                  | -0,517  | 2,916E-07  |
| TcCLB.511039.3   | choline/ethanolamine phosphotransferase, putative (CEPT)    | -0,5171 | 0,07835    |
| TcCLB.506925.280 | hypothetical protein, conserved                             | -0,5172 | 0,0002341  |
| TcCLB.510761.60  | casein kinase II, putative                                  | -0,5176 | 7,742E-07  |
| TcCLB.508387.70  | hypothetical protein, conserved                             | -0,5178 | 1,492E-10  |
| TcCLB.509979.249 | syntaxin binding protein 1 (pseudogene), putative           | -0,5178 | 0,003244   |
| TcCLB.508461.174 | hypothetical protein, conserved                             | -0,5178 | 0,03746    |
| TcCLB.511577.110 | exopolyphosphatase                                          | -0,5181 | 0,002647   |
| TcCLB.509023.20  | hypothetical protein, conserved                             | -0,5181 | 0,007693   |
| TcCLB.507603.50  | Mitochondrial Ribosomal Protein of Small Subunit 29, puta   | -0,5183 | 0,00002242 |
| TcCLB.508933.5   | serine/threonine protein phosphatase PP1 (fragment)         | -0,5184 | 0,01805    |
| TcCLB.511133.4   | DNA repair and recombination helicase protein PIF6, putat   | -0,5185 | 0,0004012  |
| TcCLB.507959.323 | syntaxin binding protein (pseudogene), putative             | -0,5187 | 0,1131     |
| TcCLB.510187.240 | hypothetical protein, conserved                             | -0,5188 | 1,528E-09  |
| TcCLB.510237.95  | hypothetical protein, conserved (pseudogene)                | -0,5188 | 0,2308     |
| TcCLB.503835.30  | hypothetical protein, conserved                             | -0,5189 | 0,00003249 |
| TcCLB.510687.50  | hypothetical protein, conserved                             | -0,519  | 1,761E-06  |
| TcCLB.506135.90  | hypothetical protein, conserved                             | -0,519  | 0,0001211  |
| TcCLB.508707.227 | ATP binding protein-like protein, putative                  | -0,5192 | 0,001968   |
| TcCLB.511001.80  | hypothetical protein, conserved                             | -0,5193 | 2,95E-07   |
| TcCLB.508931.50  | hypothetical protein                                        | -0,5193 | 0,00002485 |
| TcCLB.511001.160 | hypothetical protein, conserved                             | -0,5194 | 4,328E-09  |
| TcCLB.506529.500 | hypothetical protein, conserved                             | -0,5194 | 0,00003365 |
| TcCLB.504005.29  | hypothetical protein, conserved                             | -0,5194 | 0,001969   |
| TcCLB.511131.98  | hypothetical protein, conserved                             | -0,5194 | 0,003902   |
| TcCLB.509473.10  | hypothetical protein (pseudogene)                           | -0,5195 | 8,723E-06  |
| TcCLB.509995.29  | hypothetical protein, conserved                             | -0,5196 | 0,003926   |
| TcCLB.508355.240 | hypothetical protein, conserved                             | -0,5196 | 0,003941   |
| TcCLB.506363.150 | soluble N-ethylmaleimide sensitive factor (NSF) attachme    | -0,5197 | 0,0009557  |
| TcCLB.508839.89  | DNA-directed rna polymerase I largest subunit, putative (fr | -0,5198 | 0,0001099  |
| TcCLB.507089.40  | CMP-sialic acid transporter, putative                       | -0,5199 | 0,0003982  |
| TcCLB.506479.120 | cytidine triphosphate synthase, putative                    | -0,5199 | 0,005091   |
| TcCLB.506595.21  | hypothetical protein                                        | -0,5201 | 0,002865   |
| TcCLB.506961.104 | ATP-dependent DEAD/H RNA helicase (pseudogene), putat       | -0,5201 | 0,02027    |

|                  |                                                               |         |            |
|------------------|---------------------------------------------------------------|---------|------------|
| TcCLB.511313.40  | ATP-dependent RNA helicase, putative                          | -0,5202 | 6,344E-08  |
| TcCLB.509791.150 | choline/ethanolamine phosphotransferase, putative (CEPT)      | -0,5202 | 2,493E-07  |
| TcCLB.510031.9   | U5 snrnp-specific protein, putative                           | -0,5202 | 0,0000438  |
| TcCLB.507967.30  | hypothetical protein, conserved (fragment)                    | -0,5202 | 0,0004347  |
| TcCLB.507093.72  | hypothetical protein, conserved                               | -0,5203 | 4,431E-08  |
| TcCLB.506959.74  | hypothetical protein, conserved                               | -0,5204 | 4,501E-06  |
| TcCLB.510337.50  | hypothetical protein, conserved (pseudogene)                  | -0,5204 | 0,005072   |
| TcCLB.506691.22  | hypothetical protein, conserved                               | -0,5206 | 1,936E-06  |
| TcCLB.424123.40  | RNA-binding protein, putative                                 | -0,5208 | 0,001083   |
| TcCLB.506499.30  | trans-sialidase (pseudogene), putative                        | -0,5209 | 0,188      |
| TcCLB.504105.20  | eukaryotic translation initiation factor 5, putative          | -0,521  | 2,172E-09  |
| TcCLB.509287.30  | hypothetical protein, conserved                               | -0,5212 | 5,658E-09  |
| TcCLB.511903.280 | hypothetical protein, conserved                               | -0,5212 | 0,0001773  |
| TcCLB.508355.420 | cation transporter protein, putative                          | -0,5213 | 0,00002177 |
| TcCLB.506241.200 | hypothetical protein, conserved                               | -0,5214 | 1,601E-07  |
| TcCLB.503813.20  | hypothetical protein, conserved                               | -0,5214 | 5,493E-06  |
| TcCLB.509005.20  | hypothetical protein, conserved                               | -0,5214 | 0,0000916  |
| TcCLB.503671.39  | dynamamin-1-like protein (fragment)                           | -0,5215 | 0,0000243  |
| TcCLB.508827.60  | hypothetical protein, conserved                               | -0,5217 | 1,935E-06  |
| TcCLB.511511.120 | hypothetical protein, conserved                               | -0,5217 | 0,00003521 |
| TcCLB.504011.60  | hypothetical protein, conserved                               | -0,5219 | 0,0000417  |
| TcCLB.506871.30  | ADP-ribosylation factor GTPase activating protein 1, putative | -0,522  | 8,722E-06  |
| TcCLB.508153.720 | hypothetical protein, conserved                               | -0,5221 | 0,01194    |
| TcCLB.511179.160 | ubiquitin-protein ligase, putative                            | -0,5223 | 0,0005192  |
| TcCLB.508741.90  | hypothetical protein                                          | -0,5227 | 7,747E-06  |
| TcCLB.508999.49  | hypothetical protein                                          | -0,5227 | 0,2302     |
| TcCLB.506297.60  | hypothetical protein, conserved                               | -0,5228 | 0,00004893 |
| TcCLB.509589.40  | hypothetical protein, conserved                               | -0,523  | 1,313E-11  |
| TcCLB.508479.180 | hypothetical protein, conserved                               | -0,5232 | 8,119E-11  |
| TcCLB.504229.50  | trans-sialidase (pseudogene), putative                        | -0,5234 | 0,02025    |
| TcCLB.508707.50  | hypothetical protein, conserved                               | -0,5237 | 0,00001321 |
| TcCLB.510025.139 | hypothetical protein, conserved (pseudogene)                  | -0,5237 | 0,4126     |
| TcCLB.507939.50  | hypothetical protein, conserved                               | -0,5238 | 9,093E-06  |
| TcCLB.506563.30  | coatomer beta subunit, putative                               | -0,5239 | 2,053E-14  |
| TcCLB.508153.340 | ATP-dependent 6-phosphofruktokinase, glycosomal (PFK)         | -0,5241 | 8,087E-06  |
| TcCLB.508953.40  | hypothetical protein, conserved                               | -0,5241 | 0,000195   |
| TcCLB.510515.50  | hypothetical protein, conserved                               | -0,5241 | 0,0002246  |
| TcCLB.506871.80  | RNA polymerase-like protein, putative                         | -0,5243 | 0,001903   |
| TcCLB.510535.109 | trans-sialidase, putative                                     | -0,5243 | 0,009547   |
| TcCLB.508165.170 | mucin-associated surface protein (MASP), putative             | -0,5243 | 0,1584     |
| TcCLB.511479.20  | hypothetical protein, conserved                               | -0,5244 | 8,565E-06  |
| TcCLB.507709.10  | hypothetical protein, conserved                               | -0,5249 | 0,007245   |
| TcCLB.510535.10  | hypothetical protein, conserved                               | -0,5251 | 0,00002374 |
| TcCLB.509941.140 | hypothetical protein, conserved                               | -0,5254 | 0,001496   |
| TcCLB.509127.104 | ARP2/3 complex subunit, putative                              | -0,5254 | 0,01452    |

|                  |                                                         |         |            |
|------------------|---------------------------------------------------------|---------|------------|
| TcCLB.508815.10  | hypothetical protein, conserved                         | -0,5256 | 0,0003736  |
| TcCLB.506925.420 | hypothetical protein, conserved                         | -0,5256 | 0,0008271  |
| TcCLB.508741.270 | Kinetoplastid RNA editing protein 1, putative (KREPA1)  | -0,5257 | 3,494E-08  |
| TcCLB.511715.40  | hypothetical protein, conserved                         | -0,5257 | 0,01845    |
| TcCLB.511851.10  | dispersed gene family protein 1 (DGF-1), putative       | -0,5258 | 0,0005057  |
| TcCLB.509287.240 | dispersed gene family protein 1 (DGF-1), putative       | -0,5258 | 0,0007593  |
| TcCLB.506957.70  | hypothetical protein, conserved                         | -0,5262 | 7,917E-06  |
| TcCLB.506629.140 | hypothetical protein, conserved                         | -0,5264 | 0,00000287 |
| TcCLB.509005.70  | hypothetical protein, conserved                         | -0,5264 | 0,0001344  |
| TcCLB.511355.30  | phosphatidic acid phosphatase protein, putative         | -0,5266 | 0,00001568 |
| TcCLB.507711.70  | hypothetical protein, conserved                         | -0,5268 | 0,0005974  |
| TcCLB.510429.40  | Present in the outer mitochondrial membrane proteome 5  | -0,5269 | 0,0001043  |
| TcCLB.508909.150 | hypothetical protein, conserved                         | -0,5269 | 0,006443   |
| TcCLB.507957.320 | mucin-associated surface protein (MASP), putative       | -0,5271 | 0,1157     |
| TcCLB.507641.190 | kinetoplastid kinetochore protein 1, putative (kkt1)    | -0,5272 | 9,599E-08  |
| TcCLB.509577.9   | hypothetical protein, conserved (fragment)              | -0,5272 | 0,0008592  |
| TcCLB.506925.40  | RNA polymerase I second largest subunit, putative       | -0,5273 | 3,81E-13   |
| TcCLB.460061.10  | hypothetical protein (fragment)                         | -0,5274 | 0,04123    |
| TcCLB.509621.10  | hypothetical protein, conserved                         | -0,5275 | 8,625E-06  |
| TcCLB.508897.30  | ABC transport system ATP-binding protein, putative      | -0,5276 | 1,276E-12  |
| TcCLB.507625.180 | kinesin, putative                                       | -0,5277 | 7,331E-07  |
| TcCLB.505037.20  | ribosomal RNA processing protein 41B, putative (RRP41B) | -0,5277 | 6,139E-06  |
| TcCLB.506619.30  | Flagellar Member 8 (FLAM8)                              | -0,5277 | 0,2462     |
| TcCLB.509429.80  | hypothetical protein, conserved                         | -0,5278 | 0,00002097 |
| TcCLB.510901.80  | hypothetical protein, conserved                         | -0,528  | 1,384E-08  |
| TcCLB.503713.10  | hypothetical protein, conserved                         | -0,528  | 0,002052   |
| TcCLB.506369.70  | histone H1, putative                                    | -0,5282 | 1,078E-17  |
| TcCLB.510755.120 | RNA-binding protein, putative                           | -0,5282 | 1,162E-07  |
| TcCLB.506829.71  | hypothetical protein, conserved (pseudogene)            | -0,5282 | 0,03621    |
| TcCLB.510901.160 | hypothetical protein, conserved                         | -0,5284 | 0,002884   |
| TcCLB.506405.60  | hypothetical protein, conserved                         | -0,5285 | 0,0009815  |
| TcCLB.504215.59  | hypothetical protein, conserved                         | -0,5286 | 1,771E-06  |
| TcCLB.507515.120 | sphingosine kinase A, B, putative                       | -0,5287 | 5,578E-06  |
| TcCLB.510827.10  | hypothetical protein, conserved                         | -0,5287 | 0,003373   |
| TcCLB.503867.10  | hypothetical protein, conserved                         | -0,5288 | 0,0001642  |
| TcCLB.507711.50  | hypothetical protein, conserved                         | -0,5288 | 0,001422   |
| TcCLB.509575.20  | hypothetical protein, conserved                         | -0,529  | 0,0005658  |
| TcCLB.503999.80  | hypothetical protein, conserved                         | -0,5291 | 9,104E-10  |
| TcCLB.506235.20  | guide RNA associated protein 1, putative (GAP1)         | -0,5292 | 3,534E-11  |
| TcCLB.507763.30  | anion-transporting ATPase-like, putative                | -0,5292 | 4,14E-07   |
| TcCLB.506587.50  | hypothetical protein, conserved                         | -0,5292 | 5,239E-06  |
| TcCLB.503785.10  | hypothetical protein, conserved (pseudogene)            | -0,5292 | 0,00002923 |
| TcCLB.509203.60  | histone acetyltransferase, putative                     | -0,5292 | 0,0000551  |
| TcCLB.506367.174 | hypothetical protein, conserved                         | -0,5292 | 0,008116   |
| TcCLB.511321.4   | O-sialoglycoprotein endopeptidase, putative             | -0,5293 | 0,07391    |



|                  |                                                                |         |            |
|------------------|----------------------------------------------------------------|---------|------------|
| TcCLB.511867.160 | hypothetical protein, conserved                                | -0,5294 | 0,004495   |
| TcCLB.509237.50  | hypothetical protein, conserved                                | -0,5295 | 1,826E-08  |
| TcCLB.503839.30  | hypothetical protein, conserved                                | -0,5296 | 3,984E-07  |
| TcCLB.508405.10  | cell division cycle protein, putative                          | -0,5296 | 9,545E-06  |
| TcCLB.503867.20  | trans-sialidase (pseudogene), putative                         | -0,5297 | 0,1255     |
| TcCLB.511385.14  | hypothetical protein, conserved (fragment)                     | -0,5298 | 3,016E-07  |
| TcCLB.511307.20  | Peptidase C19, ubiquitin carboxyl-terminal hydrolase, putative | -0,5299 | 7,505E-06  |
| TcCLB.506561.20  | retrotransposon hot spot protein (RHS, pseudogene), putative   | -0,53   | 0,001273   |
| TcCLB.505965.70  | helicase (pseudogene), putative                                | -0,5302 | 1,431E-06  |
| TcCLB.508543.160 | hypothetical protein, conserved                                | -0,5303 | 3,152E-07  |
| TcCLB.508479.300 | hypothetical protein, conserved                                | -0,5303 | 0,00005199 |
| TcCLB.510121.120 | hypothetical protein, conserved                                | -0,5305 | 0,0001244  |
| TcCLB.508479.50  | trans-sialidase (pseudogene), putative                         | -0,5307 | 0,0004492  |
| TcCLB.504741.180 | hypothetical protein, conserved                                | -0,5309 | 0,0001116  |
| TcCLB.506337.220 | hypothetical protein                                           | -0,5309 | 0,0008389  |
| TcCLB.510311.70  | 26S protease regulatory subunit, putative                      | -0,5312 | 8,772E-08  |
| TcCLB.509625.10  | ATP-dependent RNA helicase, putative (fragment)                | -0,5314 | 3,913E-06  |
| TcCLB.506493.40  | hypothetical protein, conserved                                | -0,5314 | 0,00001626 |
| TcCLB.508137.20  | hypothetical protein, conserved                                | -0,5316 | 1,099E-08  |
| TcCLB.508949.10  | hypothetical protein, conserved                                | -0,5317 | 0,0004042  |
| TcCLB.506927.10  | hypothetical protein, conserved (pseudogene)                   | -0,5318 | 0,01416    |
| TcCLB.506067.189 | trans-sialidase (pseudogene), putative                         | -0,5318 | 0,1298     |
| TcCLB.506559.250 | hypothetical protein, conserved                                | -0,532  | 4,617E-06  |
| TcCLB.508873.300 | hypothetical protein                                           | -0,532  | 0,3103     |
| TcCLB.503689.40  | hypothetical protein, conserved                                | -0,5321 | 2,306E-08  |
| TcCLB.509879.10  | hypothetical protein, conserved                                | -0,5322 | 0,003115   |
| TcCLB.508737.160 | hypothetical protein, conserved                                | -0,5323 | 2,905E-07  |
| TcCLB.508365.210 | mucin TcMUCl, putative                                         | -0,5323 | 0,4144     |
| TcCLB.507037.70  | hypothetical protein, conserved                                | -0,5324 | 0,00000106 |
| TcCLB.508541.220 | casein kinase, putative                                        | -0,5324 | 0,02061    |
| TcCLB.511675.6   | hypothetical protein, conserved (pseudogene)                   | -0,5324 | 0,3324     |
| TcCLB.510403.71  | trans-sialidase (pseudogene), putative                         | -0,5325 | 2,086E-06  |
| TcCLB.510201.50  | dispersed gene family protein 1 (DGF-1), putative              | -0,5325 | 0,003761   |
| TcCLB.511379.9   | hypothetical protein, conserved (fragment)                     | -0,5326 | 0,0001934  |
| TcCLB.510739.10  | hypothetical protein, conserved                                | -0,5328 | 0,001739   |
| TcCLB.506529.30  | hypothetical protein, conserved                                | -0,533  | 0,0103     |
| TcCLB.509619.10  | Zn-finger protein, putative                                    | -0,5331 | 0,00001004 |
| TcCLB.511409.20  | hypothetical protein, conserved                                | -0,5331 | 0,004938   |
| TcCLB.506247.420 | hypothetical protein, conserved                                | -0,5331 | 0,01415    |
| TcCLB.507237.310 | surface protease GP63 (pseudogene), putative                   | -0,5331 | 0,2051     |
| TcCLB.510279.276 | hypothetical protein, conserved (pseudogene)                   | -0,5336 | 0,1016     |
| TcCLB.511355.50  | glycerol uptake protein, putative                              | -0,5338 | 1,924E-06  |
| TcCLB.506213.70  | hypothetical protein, conserved                                | -0,5338 | 0,00005197 |
| TcCLB.508359.70  | hypothetical protein                                           | -0,5338 | 0,2066     |
| TcCLB.503713.50  | trans-sialidase, putative (fragment)                           | -0,5338 | 0,2968     |

|                   |                                                               |         |            |
|-------------------|---------------------------------------------------------------|---------|------------|
| TcCLB.509911.10   | hypothetical protein, conserved                               | -0,5339 | 1,389E-08  |
| TcCLB.508409.110  | hypothetical protein, conserved                               | -0,5339 | 1,529E-06  |
| TcCLB.510285.140  | hypothetical protein, conserved (fragment)                    | -0,5339 | 0,2483     |
| TcCLB.508289.41   | syntaxin binding protein (pseudogene), putative               | -0,534  | 0,1078     |
| TcCLB.510687.100  | Unc104-like kinesin, putative                                 | -0,5341 | 1,272E-08  |
| TcCLB.509109.50   | hypothetical protein                                          | -0,5342 | 2,891E-08  |
| TcCLB.506739.30   | hypothetical protein                                          | -0,5343 | 1,402E-08  |
| TcCLB.510181.50   | nucleoporin interacting component (NUP93), putative           | -0,5343 | 5,461E-06  |
| TcCLB.508909.160  | hypothetical protein, conserved                               | -0,5343 | 0,005069   |
| TcCLB.504431.90   | U2 small nuclear ribonucleoprotein B, putative                | -0,5343 | 0,006337   |
| TcCLB.511285.90   | 19S proteasome non-atpase subunit 8 (Rpn8)                    | -0,5344 | 9,258E-07  |
| TcCLB.508277.200  | hypothetical protein, conserved                               | -0,5344 | 0,00004228 |
| TcCLB.508257.90   | hypothetical protein, conserved                               | -0,5345 | 4,952E-06  |
| TcCLB.507041.76   | hypothetical protein, conserved (pseudogene)                  | -0,5345 | 0,002846   |
| TcCLB.506253.30   | hypothetical protein                                          | -0,5345 | 0,1421     |
| TcCLB.509059.60   | hypothetical protein, conserved                               | -0,5347 | 0,04245    |
| TcCLB.507895.31   | retrotransposon hot spot protein (RHS, pseudogene), putative  | -0,5347 | 0,05591    |
| TcCLB.506813.80   | trans-sialidase, Group V, putative                            | -0,5347 | 0,16       |
| TcCLB.509455.120  | Peptide chain release factor 1, mitochondrial, putative (RF)  | -0,5349 | 9,227E-06  |
| TcCLB.508821.60   | hypothetical protein, conserved                               | -0,5349 | 0,08659    |
| TcCLB.507519.190  | protein kinase (pseudogene), putative                         | -0,5349 | 0,114      |
| TcCLB.508365.284  | mucin-associated surface protein (MASP, pseudogene), putative | -0,5349 | 0,1239     |
| TcCLB.504741.170  | dual specificity protein phosphatase, putative                | -0,535  | 0,00137    |
| TcCLB.504009.30   | hypothetical protein, conserved                               | -0,5351 | 0,0000159  |
| TcCLB.510029.60   | Vesicle-trafficking protein SEC22, putative (SEC22)           | -0,5352 | 0,0001872  |
| TcCLB.510515.80   | hypothetical protein, conserved                               | -0,5353 | 4,323E-07  |
| TcCLB.511003.100  | hypothetical protein, conserved                               | -0,5353 | 2,325E-06  |
| TcCLB.510155.270  | dispersed gene family protein 1 (DGF-1, pseudogene), putative | -0,5354 | 9,675E-06  |
| TcCLB.509319.40   | hypothetical protein, conserved                               | -0,5357 | 0,00002569 |
| TcCLB.509669.40   | Zn-finger protein, putative                                   | -0,5358 | 1,249E-11  |
| TcCLB.510329.190  | hypothetical protein, conserved                               | -0,5358 | 2,55E-08   |
| TcCLB.503675.10   | glycosyl transferase-like protein, putative                   | -0,536  | 0,004939   |
| TcCLB.509161.120  | hypothetical protein, conserved                               | -0,5361 | 4,473E-06  |
| TcCLB.511481.20   | hypothetical protein, conserved                               | -0,5361 | 0,003611   |
| TcCLB.510355.240  | hypothetical protein, conserved                               | -0,5362 | 0,0001936  |
| TcCLB.508221.1010 | mucin-associated surface protein (MASP), putative             | -0,5363 | 0,01841    |
| TcCLB.509317.100  | hypothetical protein, conserved                               | -0,5367 | 0,0003755  |
| TcCLB.503541.30   | hypothetical protein, conserved                               | -0,5368 | 0,008942   |
| TcCLB.503973.340  | trans-sialidase (pseudogene), putative                        | -0,5368 | 0,2478     |
| TcCLB.507715.70   | hypothetical protein, conserved                               | -0,5369 | 4,45E-08   |
| TcCLB.510363.270  | mucin TcMUCII, putative                                       | -0,5369 | 0,6796     |
| TcCLB.506147.180  | DNA polymerase epsilon catalytic subunit, putative            | -0,537  | 1,965E-08  |
| TcCLB.508409.199  | hypothetical protein, conserved                               | -0,537  | 0,0007396  |
| TcCLB.510247.10   | R27-2 protein, putative                                       | -0,5371 | 0,00001219 |
| TcCLB.509819.49   | Myotubularin-related protein, putative (fragment)             | -0,5371 | 0,000664   |

|                  |                                                          |         |            |
|------------------|----------------------------------------------------------|---------|------------|
| TcCLB.509755.80  | mucin-associated surface protein (MASP, pseudogene), pu  | -0,5371 | 0,3706     |
| TcCLB.503653.50  | histone deacetylase, putative                            | -0,5372 | 3,628E-06  |
| TcCLB.509987.10  | hypothetical protein, conserved                          | -0,5372 | 0,0006052  |
| TcCLB.503781.70  | proteasome subunit beta type-5, putative                 | -0,5373 | 1,039E-06  |
| TcCLB.509167.10  | hypothetical protein, conserved                          | -0,5373 | 1,408E-06  |
| TcCLB.504039.140 | surface protease GP63 (pseudogene), putative             | -0,5373 | 0,3078     |
| TcCLB.506869.20  | hypothetical protein, conserved                          | -0,5374 | 0,0001269  |
| TcCLB.508637.100 | hypothetical protein, conserved                          | -0,5374 | 0,001266   |
| TcCLB.508659.50  | serine/threonine protein kinase, putative                | -0,5374 | 0,007995   |
| TcCLB.506949.10  | DNA-directed rna polymerase I largest subunit, putative  | -0,5374 | 0,03739    |
| TcCLB.509059.89  | vacuolar assembly protein vps41, putative (fragment)     | -0,5375 | 0,0507     |
| TcCLB.509177.30  | hypothetical protein, conserved                          | -0,5376 | 1,925E-07  |
| TcCLB.401469.10  | zinc finger protein 2, putative                          | -0,5376 | 5,163E-06  |
| TcCLB.511545.150 | hypothetical protein, conserved                          | -0,5376 | 0,00001512 |
| TcCLB.511127.420 | hypothetical protein, conserved                          | -0,5376 | 0,0001981  |
| TcCLB.509611.130 | hypothetical protein, conserved                          | -0,538  | 0,009403   |
| TcCLB.503833.69  | ribosome biogenesis protein, putative (fragment)         | -0,5381 | 0,0005073  |
| TcCLB.504449.40  | hypothetical protein                                     | -0,5383 | 0,00002979 |
| TcCLB.508405.90  | soluble N-ethylmaleimide sensitive factor (NSF) attachme | -0,5386 | 0,0006668  |
| TcCLB.504835.20  | 3-methylcrotonyl-CoA carboxylase, putative               | -0,5387 | 5,788E-08  |
| TcCLB.509799.130 | hypothetical protein, conserved                          | -0,539  | 2,533E-08  |
| TcCLB.510873.20  | surface protease GP63, putative                          | -0,539  | 0,0001286  |
| TcCLB.510439.20  | hypothetical protein, conserved                          | -0,5394 | 0,01593    |
| TcCLB.508247.90  | trans-sialidase, Group V, putative                       | -0,5394 | 0,4818     |
| TcCLB.506813.190 | trans-sialidase, Group VI, putative                      | -0,5395 | 0,0411     |
| TcCLB.510105.9   | ATP-dependent DEAD/H RNA helicase, putative              | -0,5396 | 0,00000643 |
| TcCLB.511511.100 | hypothetical protein, conserved                          | -0,5398 | 1,997E-10  |
| TcCLB.511385.80  | kinesin-like protein, putative                           | -0,5398 | 0,00009773 |
| TcCLB.508543.70  | hypothetical protein, conserved                          | -0,5399 | 0,0003084  |
| TcCLB.506405.4   | hypothetical protein, conserved (fragment)               | -0,5402 | 8,508E-06  |
| TcCLB.506247.360 | hypothetical protein, conserved                          | -0,5403 | 0,00008186 |
| TcCLB.504041.29  | DNA repair protein, putative                             | -0,5403 | 0,0002299  |
| TcCLB.507259.4   | hypothetical protein, conserved                          | -0,5403 | 0,001418   |
| TcCLB.510081.21  | ATP-dependent DEAD/H RNA helicase (pseudogene), putat    | -0,5404 | 0,03438    |
| TcCLB.508317.60  | hypothetical protein, conserved                          | -0,5407 | 0,001358   |
| TcCLB.511107.30  | hypothetical protein, conserved                          | -0,5409 | 3,294E-07  |
| TcCLB.507925.30  | hypothetical protein, conserved                          | -0,5409 | 0,01825    |
| TcCLB.503431.100 | chromatin assembly factor 1 subunit B, putative          | -0,5411 | 6,813E-07  |
| TcCLB.507677.110 | hypothetical protein                                     | -0,5411 | 8,911E-07  |
| TcCLB.510431.90  | hypothetical protein, conserved                          | -0,5412 | 0,001824   |
| TcCLB.506483.69  | mitogen activated protein kinase 4, putative (MPK4)      | -0,5413 | 0,0004522  |
| TcCLB.507675.20  | hypothetical protein, conserved                          | -0,5414 | 3,263E-07  |
| TcCLB.506175.110 | hypothetical protein, conserved                          | -0,5415 | 7,634E-08  |
| TcCLB.504033.140 | hypothetical protein, conserved (pseudogene)             | -0,5415 | 1,668E-07  |
| TcCLB.511577.60  | DNA excision/repair protein SNF2, putative               | -0,5415 | 3,479E-07  |

|                  |                                                                 |         |            |
|------------------|-----------------------------------------------------------------|---------|------------|
| TcCLB.503703.20  | hypothetical protein, conserved                                 | -0,5415 | 0,00006548 |
| TcCLB.507011.20  | hypothetical protein, conserved                                 | -0,5417 | 0,00005682 |
| TcCLB.506577.110 | hypothetical protein, conserved                                 | -0,5417 | 0,004847   |
| TcCLB.509213.90  | hypothetical protein, conserved                                 | -0,5418 | 0,002537   |
| TcCLB.507625.186 | hypothetical protein, conserved                                 | -0,542  | 0,002718   |
| TcCLB.506241.60  | kinesin, putative                                               | -0,5421 | 2,685E-07  |
| TcCLB.511553.180 | hypothetical protein                                            | -0,5422 | 0,4134     |
| TcCLB.508095.20  | methyltransferase, putative                                     | -0,5423 | 1,217E-11  |
| TcCLB.510611.10  | hypothetical protein, conserved                                 | -0,5423 | 0,00001122 |
| TcCLB.509289.10  | amastin, putative                                               | -0,5423 | 0,00001327 |
| TcCLB.506945.90  | hypothetical protein, conserved                                 | -0,5423 | 0,02866    |
| TcCLB.509965.70  | hypothetical protein, conserved                                 | -0,5424 | 2,373E-06  |
| TcCLB.507585.20  | hypothetical protein, conserved                                 | -0,5424 | 0,00001227 |
| TcCLB.506113.55  | N-acetyltransferase complex ARD1 subunit (pseudogene),          | -0,5424 | 0,08492    |
| TcCLB.503885.10  | hypothetical protein, conserved                                 | -0,5425 | 0,0002481  |
| TcCLB.508231.170 | hypothetical protein, conserved                                 | -0,5427 | 1,468E-08  |
| TcCLB.506303.20  | cell division cycle protein 45 (CDC45), putative                | -0,5427 | 0,0000315  |
| TcCLB.507995.10  | trans-sialidase (pseudogene), putative                          | -0,5427 | 0,0004425  |
| TcCLB.508461.344 | hypothetical protein, conserved                                 | -0,543  | 0,0006022  |
| TcCLB.507047.20  | dispersed gene family protein 1 (DGF-1, pseudogene), putative   | -0,543  | 0,0018     |
| TcCLB.506817.40  | hypothetical protein, conserved                                 | -0,5431 | 4,142E-07  |
| TcCLB.511857.80  | AMP deaminase, putative                                         | -0,5432 | 0,0000025  |
| TcCLB.508543.40  | hypothetical protein, conserved                                 | -0,5432 | 0,008049   |
| TcCLB.510131.99  | hypothetical protein, conserved                                 | -0,5434 | 0,0002836  |
| TcCLB.508409.310 | hypothetical protein, conserved                                 | -0,5436 | 0,0001316  |
| TcCLB.510729.240 | hypothetical protein, conserved                                 | -0,5438 | 0,0002376  |
| TcCLB.508177.100 | ubiquitin activating enzyme, putative                           | -0,5439 | 0,001536   |
| TcCLB.506363.30  | hypothetical protein, conserved                                 | -0,544  | 6,272E-08  |
| TcCLB.509073.50  | hypothetical protein, conserved                                 | -0,544  | 0,00002439 |
| TcCLB.508593.60  | hypothetical protein, conserved                                 | -0,544  | 0,00007732 |
| TcCLB.511199.9   | ATP-dependent RNA helicase FAL1, putative (fragment)            | -0,544  | 0,003071   |
| TcCLB.506917.27  | hypothetical protein, conserved (pseudogene)                    | -0,544  | 0,02578    |
| TcCLB.470827.20  | trans-sialidase, putative                                       | -0,5442 | 0,0001564  |
| TcCLB.506567.50  | hypothetical protein, conserved                                 | -0,5442 | 0,0002497  |
| TcCLB.506629.160 | hypothetical protein, conserved                                 | -0,5443 | 0,01072    |
| TcCLB.506247.110 | hypothetical protein, conserved                                 | -0,5444 | 0,0002457  |
| TcCLB.508255.20  | hypothetical protein, conserved (pseudogene)                    | -0,5445 | 0,0006718  |
| TcCLB.503847.20  | myosin heavy chain, putative                                    | -0,5446 | 7,2E-08    |
| TcCLB.510689.60  | Double RNA binding domain protein 7 (DRBD7)                     | -0,5446 | 9,816E-07  |
| TcCLB.509031.6   | hypothetical protein, conserved                                 | -0,5446 | 0,005729   |
| TcCLB.506941.100 | hypothetical protein, conserved                                 | -0,5447 | 1,283E-09  |
| TcCLB.508181.90  | hypothetical protein, conserved (pseudogene)                    | -0,5447 | 2,333E-06  |
| TcCLB.503993.30  | surface protease GP63, putative                                 | -0,5449 | 0,00379    |
| TcCLB.504119.4   | DNA-directed RNA polymerase III subunit C1, putative (fragment) | -0,5449 | 0,016      |
| TcCLB.509733.120 | hypothetical protein, conserved                                 | -0,5451 | 1,165E-09  |

|                  |                                                           |         |            |
|------------------|-----------------------------------------------------------|---------|------------|
| TcCLB.511867.60  | hypothetical protein, conserved                           | -0,5453 | 0,0002933  |
| TcCLB.511589.170 | oxidoreductase, putative                                  | -0,5453 | 0,001317   |
| TcCLB.509525.350 | mucin TcMUCII, putative                                   | -0,5454 | 0,2943     |
| TcCLB.506677.20  | cdc2-related kinase 3, putative (CRK3)                    | -0,5456 | 0,004229   |
| TcCLB.509471.59  | histone H3, putative                                      | -0,5457 | 0,02375    |
| TcCLB.508817.180 | DIS3-like exonuclease, putative (pseudogene)              | -0,546  | 1,036E-07  |
| TcCLB.507047.80  | zinc-finger protein ZPR1, putative                        | -0,5462 | 0,00003413 |
| TcCLB.508199.10  | ADP-ribosylation factor, putative                         | -0,5466 | 0,0001544  |
| TcCLB.507943.70  | hypothetical protein, conserved                           | -0,5467 | 0,0001478  |
| TcCLB.510047.129 | mucin TcMUCII, putative                                   | -0,5467 | 0,4882     |
| TcCLB.504251.9   | peroxisome assembly protein, putative (fragment)          | -0,5468 | 3,666E-06  |
| TcCLB.506247.40  | hypothetical protein, conserved                           | -0,5468 | 0,00001393 |
| TcCLB.504089.54  | protein kinase, putative                                  | -0,547  | 2,314E-07  |
| TcCLB.511751.240 | hypothetical protein, conserved (pseudogene)              | -0,547  | 0,00001115 |
| TcCLB.506445.60  | mitochondrial DNA topoisomerase II, putative              | -0,5473 | 4,6E-12    |
| TcCLB.507093.10  | hypothetical protein, conserved                           | -0,5473 | 8,203E-08  |
| TcCLB.510187.180 | hypothetical protein, conserved                           | -0,5475 | 3,261E-13  |
| TcCLB.506483.60  | hypothetical protein, conserved                           | -0,5477 | 0,0003448  |
| TcCLB.510661.19  | ubiquitin-activating enzyme E1, putative (fragment)       | -0,5478 | 0,0000155  |
| TcCLB.511531.44  | hypothetical protein                                      | -0,5478 | 0,0004606  |
| TcCLB.504207.5   | hypothetical protein, conserved                           | -0,5478 | 0,137      |
| TcCLB.506297.290 | protein transport protein SEC31, putative                 | -0,5479 | 4,384E-15  |
| TcCLB.504105.260 | bilobe protein, conserved                                 | -0,5479 | 0,1282     |
| TcCLB.507975.40  | dispersed gene family protein 1 (DGF-1), putative         | -0,5483 | 0,0001506  |
| TcCLB.509167.100 | valyl-tRNA synthetase, putative                           | -0,5484 | 4,251E-16  |
| TcCLB.508013.10  | mucin-associated surface protein (MASP, pseudogene), pu   | -0,5486 | 0,3639     |
| TcCLB.511233.50  | hypothetical protein, conserved                           | -0,5487 | 0,00001431 |
| TcCLB.508717.40  | branch point binding protein, putative                    | -0,5488 | 0,00006846 |
| TcCLB.511599.61  | hypothetical protein, conserved (pseudogene)              | -0,5489 | 0,006256   |
| TcCLB.510361.100 | mucin TcMUCII, putative                                   | -0,5489 | 0,2085     |
| TcCLB.506989.180 | U3 small nucleolar ribonucleoprotein protein MPP10, putat | -0,549  | 2,899E-08  |
| TcCLB.510435.5   | hypothetical protein, conserved (pseudogene)              | -0,549  | 0,002251   |
| TcCLB.509753.180 | hypothetical protein, conserved (pseudogene)              | -0,549  | 0,0666     |
| TcCLB.510219.40  | hypothetical protein, conserved                           | -0,5491 | 0,0001185  |
| TcCLB.511163.30  | NGG1 interacting factor 3, putative                       | -0,5491 | 0,004325   |
| TcCLB.507765.10  | hypothetical protein, conserved                           | -0,5491 | 0,01703    |
| TcCLB.510357.10  | DnaJ chaperone protein, putative                          | -0,5493 | 2,046E-09  |
| TcCLB.511287.130 | hypothetical protein, conserved                           | -0,5494 | 1,346E-07  |
| TcCLB.507809.119 | hypothetical protein, conserved                           | -0,5496 | 1,857E-07  |
| TcCLB.507969.70  | hypothetical protein, conserved                           | -0,5496 | 0,001766   |
| TcCLB.507105.20  | mitochondrial RNA binding complex 1 subunit, putative     | -0,5497 | 0,0001711  |
| TcCLB.509525.50  | hypothetical protein                                      | -0,55   | 0,3725     |
| TcCLB.508707.270 | hypothetical protein, conserved                           | -0,5501 | 8,953E-08  |
| TcCLB.506479.39  | serine/threonine protein phosphatase 2A regulatory subun  | -0,5503 | 0,00001883 |
| TcCLB.510429.20  | tRNA (guanine-N(7)-)-methyltransferase, putative          | -0,5503 | 0,002711   |

|                  |                                                             |         |            |
|------------------|-------------------------------------------------------------|---------|------------|
| TcCLB.510547.7   | surface protease GP63 (pseudogene), putative                | -0,5504 | 0,175      |
| TcCLB.507757.10  | hypothetical protein                                        | -0,5505 | 0,0003879  |
| TcCLB.504109.174 | hypothetical protein, conserved                             | -0,5506 | 0,00002562 |
| TcCLB.510693.230 | mucin-associated surface protein (MASP), putative           | -0,5506 | 0,2583     |
| TcCLB.507969.30  | sphingosine-1-phosphate phosphatase, putative               | -0,5507 | 6,876E-07  |
| TcCLB.506127.100 | hypothetical protein, conserved                             | -0,5507 | 0,0001832  |
| TcCLB.504239.390 | syntaxin binding protein (pseudogene), putative             | -0,5508 | 0,2863     |
| TcCLB.508707.30  | hypothetical protein, conserved                             | -0,551  | 4,075E-10  |
| TcCLB.510895.29  | hypothetical protein, conserved                             | -0,5511 | 0,006289   |
| TcCLB.507143.10  | hypothetical protein, conserved                             | -0,5512 | 4,209E-10  |
| TcCLB.509951.20  | hypothetical protein, conserved                             | -0,5512 | 0,04776    |
| TcCLB.503869.60  | coatamer beta subunit (pseudogene), putative                | -0,5514 | 4,749E-10  |
| TcCLB.507603.60  | hypothetical protein, conserved                             | -0,5514 | 0,00004853 |
| TcCLB.511277.260 | hypothetical protein, conserved                             | -0,5515 | 0,00002727 |
| TcCLB.510001.10  | hypothetical Zinc-finger containing protein                 | -0,5515 | 0,000377   |
| TcCLB.510743.50  | phospholipase A2-like protein, putative                     | -0,5516 | 0,0001202  |
| TcCLB.506335.130 | trans-sialidase, Group V, putative                          | -0,5518 | 0,1747     |
| TcCLB.508851.200 | hypothetical protein, conserved                             | -0,5519 | 0,0002607  |
| TcCLB.461165.4   | hypothetical protein, conserved (fragment)                  | -0,5519 | 0,04599    |
| TcCLB.508609.20  | hypothetical protein                                        | -0,5521 | 0,001543   |
| TcCLB.507163.90  | hypothetical protein, conserved                             | -0,5522 | 0,009949   |
| TcCLB.509539.59  | hypothetical protein, conserved                             | -0,5523 | 0,0134     |
| TcCLB.507037.89  | hypothetical protein, conserved                             | -0,5523 | 0,01552    |
| TcCLB.509349.10  | trans-sialidase (pseudogene), putative                      | -0,5523 | 0,2532     |
| TcCLB.507083.109 | hypothetical protein, conserved (fragment)                  | -0,5525 | 9,688E-11  |
| TcCLB.506563.4   | hypothetical protein, conserved                             | -0,5526 | 0,009842   |
| TcCLB.510359.270 | mitochondrial RNA-binding protein 2, putative               | -0,5527 | 1,671E-06  |
| TcCLB.511389.100 | hypothetical protein, conserved                             | -0,5528 | 0,0001015  |
| TcCLB.506949.20  | hypothetical protein, conserved                             | -0,5529 | 1,069E-12  |
| TcCLB.503419.50  | MRB1-associated protein, putative (RGG2)                    | -0,553  | 0,00007162 |
| TcCLB.504427.170 | hypothetical protein, conserved                             | -0,553  | 0,0006102  |
| TcCLB.507001.30  | ankyrin repeat protein, putative                            | -0,553  | 0,007131   |
| TcCLB.507389.20  | hypothetical protein, conserved                             | -0,5532 | 0,002401   |
| TcCLB.504441.10  | trans-sialidase, putative (fragment)                        | -0,5533 | 0,2452     |
| TcCLB.509775.30  | hypothetical protein, conserved                             | -0,5534 | 1,443E-11  |
| TcCLB.508815.140 | protein transport protein SEC13, putative                   | -0,5534 | 7,229E-06  |
| TcCLB.506945.220 | serine/arginine-rich protein specific kinase SRPK, putative | -0,5535 | 7,656E-15  |
| TcCLB.511275.40  | hypothetical protein, conserved                             | -0,5535 | 0,001508   |
| TcCLB.506223.90  | hypothetical protein, conserved                             | -0,5536 | 0,00001314 |
| TcCLB.507739.20  | metallo-peptidase, Clan MA(E) Family M41                    | -0,5539 | 7,384E-08  |
| TcCLB.508771.50  | hypothetical protein, conserved                             | -0,554  | 1,097E-06  |
| TcCLB.511711.10  | hypothetical protein, conserved                             | -0,5541 | 8,427E-06  |
| TcCLB.509949.9   | dispersed gene family protein 1 (DGF-1), putative           | -0,5547 | 0,02636    |
| TcCLB.503919.4   | hypothetical protein, conserved                             | -0,5547 | 0,0634     |
| TcCLB.508727.44  | hypothetical protein, conserved                             | -0,555  | 1,942E-07  |

|                  |                                                                 |         |            |
|------------------|-----------------------------------------------------------------|---------|------------|
| TcCLB.510659.264 | prenyl protein specific carboxyl methyltransferase, putative    | -0,5551 | 0,000333   |
| TcCLB.506201.160 | hypothetical protein, conserved                                 | -0,5553 | 0,02481    |
| TcCLB.410199.30  | trans-sialidase, Group VI, putative                             | -0,5554 | 0,004648   |
| TcCLB.506629.170 | hypothetical protein                                            | -0,5556 | 0,02452    |
| TcCLB.509287.10  | hypothetical protein, conserved                                 | -0,5558 | 0,001392   |
| TcCLB.511859.90  | hypothetical protein                                            | -0,5559 | 0,002694   |
| TcCLB.509179.80  | hypothetical protein, conserved                                 | -0,5559 | 0,009119   |
| TcCLB.511867.10  | hypothetical protein, conserved                                 | -0,556  | 2,512E-06  |
| TcCLB.510091.20  | hypothetical protein, conserved                                 | -0,556  | 0,004139   |
| TcCLB.506939.209 | mucin TcMUCII (pseudogene), putative                            | -0,5561 | 0,09371    |
| TcCLB.505997.174 | dispersed gene family protein 1 (DGF-1), putative               | -0,5562 | 0,003081   |
| TcCLB.507875.150 | damage-specific DNA binding protein (pseudogene), putative      | -0,5564 | 0,0007878  |
| TcCLB.506579.100 | hypothetical protein, conserved                                 | -0,5568 | 0,00003195 |
| TcCLB.510421.140 | hypothetical protein, conserved                                 | -0,5569 | 0,0003607  |
| TcCLB.503639.30  | hypothetical protein, conserved                                 | -0,557  | 0,00005771 |
| TcCLB.506525.40  | syntaxin 5, putative                                            | -0,5571 | 5,476E-06  |
| TcCLB.511039.20  | hypothetical protein, conserved                                 | -0,5571 | 8,403E-06  |
| TcCLB.508355.180 | hypothetical protein, conserved                                 | -0,5572 | 0,00003837 |
| TcCLB.437999.9   | hypothetical protein, conserved (fragment)                      | -0,5572 | 0,0003074  |
| TcCLB.509157.230 | hypothetical protein, conserved                                 | -0,5573 | 8,548E-08  |
| TcCLB.508911.80  | hypothetical protein, conserved                                 | -0,5576 | 0,0002117  |
| TcCLB.506357.69  | hypothetical protein, conserved                                 | -0,5576 | 0,05069    |
| TcCLB.511041.20  | hypothetical protein, conserved                                 | -0,5577 | 5,015E-10  |
| TcCLB.503733.80  | hypothetical protein, conserved                                 | -0,5577 | 0,00000022 |
| TcCLB.508455.30  | hypothetical protein                                            | -0,5578 | 0,3014     |
| TcCLB.507103.20  | hypothetical protein                                            | -0,5581 | 9,917E-12  |
| TcCLB.509603.19  | malonyl-CoA decarboxylase, mitochondrial precursor, putative    | -0,5584 | 0,02102    |
| TcCLB.510595.10  | hypothetical protein                                            | -0,5587 | 2,469E-06  |
| TcCLB.507603.10  | hypothetical protein, conserved (pseudogene)                    | -0,5587 | 0,0003369  |
| TcCLB.509047.40  | hypothetical protein, conserved                                 | -0,5589 | 2,937E-11  |
| TcCLB.510599.30  | hypothetical protein, conserved                                 | -0,5589 | 2,06E-09   |
| TcCLB.508579.20  | hypothetical protein, conserved                                 | -0,5589 | 0,01593    |
| TcCLB.430281.10  | retrotransposon hot spot protein (RHS, pseudogene), putative    | -0,5589 | 0,07033    |
| TcCLB.506269.10  | mucin-associated surface protein (MASP), putative               | -0,5591 | 0,05431    |
| TcCLB.507437.10  | mucin-associated surface protein (MASP), putative               | -0,5592 | 0,07083    |
| TcCLB.508741.390 | hypothetical protein, conserved                                 | -0,5594 | 9,533E-10  |
| TcCLB.507159.14  | hypothetical protein, conserved                                 | -0,5594 | 0,003481   |
| TcCLB.509187.10  | trans-sialidase, Group II, putative                             | -0,5594 | 0,551      |
| TcCLB.511051.30  | nucleobase transporter, putative                                | -0,5595 | 3,232E-07  |
| TcCLB.506753.160 | hypothetical protein, conserved                                 | -0,5596 | 0,002084   |
| TcCLB.507819.11  | N-acetyltransferase complex ARD1 subunit (pseudogene), putative | -0,5598 | 0,02148    |
| TcCLB.506337.180 | hypothetical protein, conserved                                 | -0,5599 | 2,877E-07  |
| TcCLB.510013.290 | mucin-associated surface protein (MASP), putative               | -0,5599 | 0,3516     |
| TcCLB.506355.130 | hypothetical protein, conserved                                 | -0,56   | 2,866E-06  |
| TcCLB.511031.49  | hypothetical protein, conserved                                 | -0,56   | 0,00009096 |

|                  |                                                             |         |            |
|------------------|-------------------------------------------------------------|---------|------------|
| TcCLB.511029.20  | kinetoplast-associated protein 3 (KAP3)                     | -0,56   | 0,0001332  |
| TcCLB.511635.50  | hypothetical protein, conserved                             | -0,5601 | 0,0008649  |
| TcCLB.508875.20  | mucin-associated surface protein (MASP), putative (fragm    | -0,5601 | 0,004367   |
| TcCLB.511585.40  | DNA-damage inducible protein DDI1-like protein, putative    | -0,5602 | 9,278E-07  |
| TcCLB.507951.114 | high mobility group protein, putative                       | -0,5604 | 1,034E-07  |
| TcCLB.511391.24  | dispersed gene family protein 1 (DGF-1, pseudogene), puta   | -0,5604 | 0,0002318  |
| TcCLB.506519.100 | hypothetical protein, conserved                             | -0,5604 | 0,002506   |
| TcCLB.503809.60  | glycerol uptake protein (pseudogene), putative              | -0,5605 | 0,00647    |
| TcCLB.503833.20  | hypothetical protein, conserved                             | -0,5606 | 3,338E-08  |
| TcCLB.510867.9   | dispersed gene family protein 1 (DGF-1), putative           | -0,5606 | 0,007547   |
| TcCLB.510367.20  | retrotransposon hot spot protein (RHS, pseudogene), putat   | -0,5606 | 0,009025   |
| TcCLB.511321.50  | hypothetical protein, conserved                             | -0,5607 | 4,469E-08  |
| TcCLB.504207.29  | hypothetical protein, conserved                             | -0,5607 | 0,00002397 |
| TcCLB.506445.20  | Eukaryotic translation initiation factor 4 gamma type 2, pu | -0,5611 | 5,45E-09   |
| TcCLB.506221.120 | hypothetical protein, conserved                             | -0,5611 | 0,0008623  |
| TcCLB.511911.81  | hypothetical protein, conserved (pseudogene)                | -0,5611 | 0,01448    |
| TcCLB.506871.10  | hypothetical protein, conserved                             | -0,5612 | 0,00000984 |
| TcCLB.504105.30  | DNA-directed RNA polymerase III subunit C1, putative (RPC   | -0,5613 | 9,325E-18  |
| TcCLB.511277.50  | hypothetical protein, conserved                             | -0,5615 | 3,21E-09   |
| TcCLB.504047.20  | hypothetical protein, conserved                             | -0,5615 | 6,878E-06  |
| TcCLB.508891.4   | hypothetical protein, conserved                             | -0,5617 | 0,0004401  |
| TcCLB.507611.120 | expression site-associated gene (ESAG-like) protein, putati | -0,5617 | 0,2943     |
| TcCLB.511603.260 | mucin TcMUCII, putative                                     | -0,5618 | 0,3432     |
| TcCLB.511751.30  | queuine tRNA-ribosyltransferase, putative                   | -0,5621 | 8,416E-08  |
| TcCLB.503561.20  | hypothetical protein, conserved                             | -0,5622 | 0,0002423  |
| TcCLB.507633.51  | trans-sialidase (pseudogene), putative                      | -0,5622 | 0,2722     |
| TcCLB.508153.450 | hypothetical protein, conserved                             | -0,5623 | 2,981E-07  |
| TcCLB.507629.10  | hypothetical protein, conserved                             | -0,5624 | 3,865E-11  |
| TcCLB.509751.4   | hypothetical protein, conserved (fragment)                  | -0,5624 | 0,03844    |
| TcCLB.507235.10  | dispersed gene family protein 1 (DGF-1), putative           | -0,5625 | 0,177      |
| TcCLB.507011.150 | hypothetical protein, conserved                             | -0,5626 | 0,0002569  |
| TcCLB.509669.160 | hypothetical protein, conserved                             | -0,5628 | 3,187E-08  |
| TcCLB.508313.60  | hypothetical protein                                        | -0,5628 | 0,4138     |
| TcCLB.511301.110 | inosine-5'-monophosphate dehydrogenase, putative            | -0,5629 | 2,146E-16  |
| TcCLB.507663.50  | ATP-dependent RNA helicase, putative                        | -0,563  | 4,626E-13  |
| TcCLB.510719.200 | telomerase reverse transcriptase, putative (TERT)           | -0,563  | 0,00000312 |
| TcCLB.511625.4   | hypothetical protein, conserved                             | -0,5631 | 0,007748   |
| TcCLB.510003.20  | hypothetical protein, conserved                             | -0,5632 | 4,631E-13  |
| TcCLB.508533.30  | metalloprotease, putative                                   | -0,5636 | 5,486E-11  |
| TcCLB.511021.90  | hypothetical protein                                        | -0,5636 | 0,00002336 |
| TcCLB.511255.618 | syntaxin binding protein (pseudogene), putative             | -0,5636 | 0,3053     |
| TcCLB.507875.140 | retrotransposon hot spot protein (RHS, pseudogene), putat   | -0,5637 | 0,02727    |
| TcCLB.508815.30  | DNA repair protein, putative                                | -0,5639 | 6,095E-10  |
| TcCLB.511511.30  | hypothetical protein, conserved                             | -0,5641 | 4,72E-08   |
| TcCLB.506793.70  | hypothetical protein, conserved                             | -0,5642 | 4,052E-09  |



|                  |                                                                |         |            |
|------------------|----------------------------------------------------------------|---------|------------|
| TcCLB.510531.54  | small nuclear ribonucleoprotein, putative                      | -0,5642 | 5,234E-06  |
| TcCLB.509753.126 | hypothetical protein, conserved (pseudogene)                   | -0,5642 | 0,1096     |
| TcCLB.509379.20  | Tob55, putative                                                | -0,5643 | 8,949E-06  |
| TcCLB.511461.4   | hypothetical protein, conserved (fragment)                     | -0,5643 | 0,005729   |
| TcCLB.511623.10  | hypothetical protein, conserved                                | -0,565  | 2,562E-08  |
| TcCLB.510351.70  | hypothetical protein, conserved                                | -0,565  | 0,00003739 |
| TcCLB.511865.54  | protein transport protein Sec61 gamma subunit, putative        | -0,5651 | 0,00001169 |
| TcCLB.508439.30  | hypothetical protein, conserved                                | -0,5654 | 3,555E-06  |
| TcCLB.510713.20  | dispersed gene family protein 1 (DGF-1), putative              | -0,5654 | 0,001203   |
| TcCLB.511255.10  | trans-sialidase, Group V, putative                             | -0,5654 | 0,1176     |
| TcCLB.508207.50  | hypothetical protein                                           | -0,5655 | 0,002665   |
| TcCLB.508661.70  | Enriched in surface-labeled proteome protein 18 (ESP18)        | -0,5656 | 0,00002533 |
| TcCLB.510593.30  | hypothetical protein, conserved                                | -0,5656 | 0,0000398  |
| TcCLB.508595.30  | hypothetical protein (pseudogene)                              | -0,5658 | 0,001746   |
| TcCLB.507951.170 | ADP-ribosylation factor-like protein 3, putative (arl3)        | -0,5659 | 7,572E-06  |
| TcCLB.504109.180 | hypothetical protein, conserved                                | -0,5659 | 0,002525   |
| TcCLB.447705.9   | hypothetical protein, conserved                                | -0,566  | 0,02829    |
| TcCLB.507513.130 | hypothetical protein, conserved (pseudogene)                   | -0,5662 | 2,252E-11  |
| TcCLB.509729.20  | hypothetical protein, conserved                                | -0,5662 | 6,754E-07  |
| TcCLB.511367.60  | la RNA binding protein, putative                               | -0,5663 | 8,342E-11  |
| TcCLB.506425.5   | receptor-type adenylate cyclase, putative (fragment)           | -0,5666 | 0,04583    |
| TcCLB.508865.20  | mitochondrial DNA polymerase I protein C, putative             | -0,5669 | 1,547E-14  |
| TcCLB.508963.40  | trans-sialidase (pseudogene), putative                         | -0,5673 | 0,0001877  |
| TcCLB.503557.49  | hypothetical protein, conserved (fragment)                     | -0,5674 | 0,02974    |
| TcCLB.506581.30  | eukaryotic translation initiation factor 3 subunit L, putative | -0,5675 | 2,836E-12  |
| TcCLB.410199.40  | hypothetical protein                                           | -0,5676 | 0,07679    |
| TcCLB.506517.100 | hypothetical protein, conserved                                | -0,5677 | 7,454E-08  |
| TcCLB.511233.150 | hypothetical protein                                           | -0,5677 | 0,2888     |
| TcCLB.508307.120 | hypothetical protein, conserved                                | -0,5678 | 1,849E-10  |
| TcCLB.511381.50  | hypothetical protein, conserved                                | -0,5678 | 1,241E-06  |
| TcCLB.504213.140 | hypothetical protein, conserved                                | -0,5679 | 0,008551   |
| TcCLB.510741.50  | hypothetical protein, conserved                                | -0,568  | 9,321E-07  |
| TcCLB.510755.110 | hypothetical protein, conserved                                | -0,568  | 0,000535   |
| TcCLB.509537.10  | pre-mRNA splicing factor ATP-dependent RNA helicase, pu        | -0,5681 | 0,00002764 |
| TcCLB.506985.20  | hypothetical protein, conserved                                | -0,5681 | 0,0002566  |
| TcCLB.507765.30  | hypothetical protein, conserved                                | -0,5682 | 0,00000314 |
| TcCLB.430605.10  | hypothetical protein, conserved                                | -0,5686 | 4,303E-11  |
| TcCLB.510765.10  | hypothetical protein, conserved                                | -0,5687 | 9,686E-06  |
| TcCLB.509353.10  | E1-like ubiquitin-activating enzyme, putative (UBA5)           | -0,5687 | 0,009712   |
| TcCLB.506673.60  | AP-3 complex subunit beta, putative (AP3B)                     | -0,5689 | 8,286E-08  |
| TcCLB.509167.70  | hypothetical protein, conserved                                | -0,5689 | 0,00003599 |
| TcCLB.510421.29  | CAAX prenyl protease 2, putative                               | -0,5691 | 0,0004753  |
| TcCLB.507967.4   | hypothetical protein, conserved                                | -0,5694 | 0,004826   |
| TcCLB.503555.10  | DNA replication licensing factor MCM8, putative                | -0,5695 | 0,00009158 |
| TcCLB.511893.40  | receptor-type adenylate cyclase, putative (fragment)           | -0,5696 | 0,04893    |

|                   |                                                            |         |            |
|-------------------|------------------------------------------------------------|---------|------------|
| TcCLB.508163.105  | elongation factor 1-gamma (EF-1-gamma, pseudogene), p      | -0,5697 | 0,241      |
| TcCLB.506885.440  | hypothetical protein, conserved                            | -0,5699 | 9,797E-09  |
| TcCLB.508347.40   | hypothetical protein, conserved                            | -0,5704 | 4,517E-13  |
| TcCLB.509073.30   | ubiquitin hydrolase, putative                              | -0,5704 | 2,859E-10  |
| TcCLB.508283.69   | dispersed gene family protein 1 (DGF-1), putative (fragme  | -0,5704 | 0,006621   |
| TcCLB.511463.20   | AMPK subunit gamma (AMPKG)                                 | -0,5708 | 0,00007392 |
| TcCLB.511519.18   | hypothetical protein, conserved                            | -0,5708 | 0,003082   |
| TcCLB.510889.200  | hypothetical protein, conserved                            | -0,5711 | 1,045E-07  |
| TcCLB.508257.240  | hypothetical protein, conserved                            | -0,5711 | 0,00004728 |
| TcCLB.511527.20   | TFIIH basal transcription factor complex helicase XPB subu | -0,5714 | 4,264E-08  |
| TcCLB.503555.40   | ATP-dependent RNA helicase, putative                       | -0,5715 | 6,232E-09  |
| TcCLB.511287.90   | ribosome biogenesis protein, putative                      | -0,5716 | 1,285E-08  |
| TcCLB.509631.60   | dispersed gene family protein 1 (DGF-1), putative          | -0,5716 | 0,01397    |
| TcCLB.510953.30   | hypothetical protein, conserved                            | -0,5717 | 3,283E-06  |
| TcCLB.504155.230  | mucin-associated surface protein (MASP), putative          | -0,5717 | 0,1485     |
| TcCLB.511529.40   | hypothetical protein, conserved                            | -0,5718 | 0,00005987 |
| TcCLB.511109.100  | DNA replication licensing factor MCM3, putative            | -0,5719 | 0,0003648  |
| TcCLB.506477.40   | Tubulin/FtsZ family, putative                              | -0,572  | 8,185E-08  |
| TcCLB.511587.36   | N-acetyltransferase complex ARD1 subunit (pseudogene),     | -0,572  | 0,07609    |
| TcCLB.509105.150  | heat shock protein 85, putative                            | -0,5722 | 2,793E-08  |
| TcCLB.503957.60   | trans-sialidase (pseudogene), putative                     | -0,5723 | 0,00005955 |
| TcCLB.505009.10   | hypothetical protein, conserved                            | -0,5725 | 0,00004119 |
| TcCLB.506287.20   | hypothetical protein, conserved                            | -0,5725 | 0,001596   |
| TcCLB.507709.70   | hypothetical protein, conserved                            | -0,5726 | 1,063E-06  |
| TcCLB.507641.220  | hypothetical protein                                       | -0,5726 | 2,172E-06  |
| TcCLB.507281.9    | dispersed gene family protein 1 (DGF-1, pseudogene), puta  | -0,5726 | 0,1037     |
| TcCLB.509047.70   | hypothetical protein, conserved                            | -0,5727 | 0,0005355  |
| TcCLB.511589.260  | glycyl-tRNA synthetase, putative                           | -0,5727 | 0,001951   |
| TcCLB.511417.40   | DNA-directed RNA polymerase III, putative                  | -0,5728 | 1,103E-07  |
| TcCLB.508035.10   | dispersed gene family protein 1 (DGF-1, pseudogene), puta  | -0,5728 | 0,1463     |
| TcCLB.511855.20   | ubiquitin-like protein, putative                           | -0,5729 | 3,483E-12  |
| TcCLB.506925.80   | hypothetical protein, conserved                            | -0,5732 | 1,091E-08  |
| TcCLB.503689.34   | hypothetical protein, conserved                            | -0,5733 | 0,02659    |
| TcCLB.506579.30   | myo-inositol-1 phosphatase, putative                       | -0,5734 | 1,13E-10   |
| TcCLB.510727.9    | hypothetical protein, conserved (fragment)                 | -0,5734 | 0,001409   |
| TcCLB.508857.60   | hypothetical protein, conserved                            | -0,5735 | 0,00006246 |
| TcCLB.507993.220  | ARF-like 2-binding protein, putative                       | -0,5735 | 0,007945   |
| TcCLB.508277.10   | condensin subunit 1, putative                              | -0,5736 | 3,237E-10  |
| TcCLB.462761.4    | hypothetical protein, conserved                            | -0,5736 | 0,004457   |
| TcCLB.510551.10   | dispersed gene family protein 1 (DGF-1, pseudogene), puta  | -0,5737 | 0,05121    |
| TcCLB.504239.270  | hypothetical protein                                       | -0,5738 | 0,3458     |
| TcCLB.506783.10   | hypothetical protein, conserved (pseudogene)               | -0,574  | 0,04077    |
| TcCLB.508153.1040 | hypothetical protein, conserved                            | -0,5741 | 4,71E-07   |
| TcCLB.510901.60   | replication factor A, 51kDa subunit, putative              | -0,5742 | 3,39E-08   |
| TcCLB.507099.130  | hypothetical protein, conserved                            | -0,5742 | 0,0001013  |

|                  |                                                               |         |            |
|------------------|---------------------------------------------------------------|---------|------------|
| TcCLB.508153.830 | peter pan protein, putative                                   | -0,5743 | 0,00004709 |
| TcCLB.511183.371 | hypothetical protein, conserved (pseudogene)                  | -0,5745 | 0,2287     |
| TcCLB.504195.9   | dispersed gene family protein 1 (DGF-1, pseudogene), putative | -0,5746 | 0,06121    |
| TcCLB.511421.30  | hypothetical protein, conserved                               | -0,5747 | 0,00001995 |
| TcCLB.507795.80  | hypothetical protein, conserved                               | -0,5748 | 7,171E-07  |
| TcCLB.508261.166 | hypothetical protein, conserved (pseudogene)                  | -0,5748 | 0,04504    |
| TcCLB.439991.10  | trans-sialidase (pseudogene), putative                        | -0,5749 | 0,05705    |
| TcCLB.510307.191 | protein kinase (pseudogene), putative                         | -0,5751 | 3,908E-08  |
| TcCLB.507623.125 | hypothetical protein, conserved                               | -0,5751 | 0,06831    |
| TcCLB.506471.10  | hypothetical protein, conserved                               | -0,5752 | 5,52E-07   |
| TcCLB.506439.18  | hypothetical protein, conserved                               | -0,5753 | 7,972E-06  |
| TcCLB.503609.10  | trans-sialidase (pseudogene), putative                        | -0,5753 | 0,347      |
| TcCLB.506297.200 | inositol-1,4,5-trisphosphate (IP3) 5-phosphatase, putative    | -0,5755 | 5,647E-08  |
| TcCLB.507165.40  | hypothetical protein, conserved                               | -0,5755 | 0,0006369  |
| TcCLB.511315.20  | hypothetical protein, conserved                               | -0,5756 | 0,00000059 |
| TcCLB.507099.90  | hypothetical protein, conserved                               | -0,5757 | 1,573E-09  |
| TcCLB.510105.80  | folylpolyglutamate synthetase (FPGS)                          | -0,5757 | 0,0000134  |
| TcCLB.509255.10  | hypothetical protein, conserved                               | -0,5758 | 9,874E-09  |
| TcCLB.511233.90  | hypothetical protein, conserved                               | -0,5759 | 0,003455   |
| TcCLB.508257.250 | hypothetical protein, conserved                               | -0,576  | 1,148E-19  |
| TcCLB.506339.100 | dispersed gene family protein 1 (DGF-1), putative             | -0,5762 | 0,004046   |
| TcCLB.511585.200 | hypothetical protein, conserved                               | -0,5763 | 2,854E-06  |
| TcCLB.404001.10  | hypothetical protein, conserved                               | -0,5764 | 1,395E-07  |
| TcCLB.508221.310 | trans-sialidase (pseudogene), putative                        | -0,5764 | 0,1419     |
| TcCLB.509267.10  | hypothetical protein, conserved                               | -0,5765 | 3,268E-09  |
| TcCLB.506945.330 | hypothetical protein, conserved                               | -0,5767 | 1,932E-14  |
| TcCLB.504157.40  | DNA replication licensing factor MCM3, putative               | -0,5769 | 0,00003046 |
| TcCLB.506821.190 | hypothetical protein, conserved                               | -0,5771 | 1,058E-06  |
| TcCLB.439125.10  | Peptide chain release factor 1, mitochondrial, putative (RF1) | -0,5771 | 0,0002136  |
| TcCLB.510879.140 | hypothetical protein, conserved                               | -0,5772 | 3,363E-06  |
| TcCLB.510699.27  | elongation factor 1-gamma (EF-1-gamma, pseudogene), putative  | -0,5772 | 0,3005     |
| TcCLB.508141.80  | hypothetical protein, conserved                               | -0,5774 | 4,105E-10  |
| TcCLB.509965.290 | p22 protein precursor, putative                               | -0,5776 | 7,334E-09  |
| TcCLB.507089.100 | hypothetical protein, conserved                               | -0,5778 | 0,00001221 |
| TcCLB.503827.80  | syntaxin binding protein (pseudogene), putative               | -0,5778 | 0,0562     |
| TcCLB.503717.10  | trans-sialidase, Group V, putative                            | -0,5779 | 0,05568    |
| TcCLB.508857.50  | hypothetical protein, conserved                               | -0,578  | 8,387E-15  |
| TcCLB.508355.340 | hypothetical protein, conserved                               | -0,578  | 0,0003807  |
| TcCLB.506679.120 | hypothetical protein                                          | -0,5781 | 0,0001004  |
| TcCLB.508951.29  | actin-like protein, putative                                  | -0,5782 | 0,00005087 |
| TcCLB.404001.4   | metalloprotease, putative (fragment)                          | -0,5783 | 1,625E-10  |
| TcCLB.508999.30  | Pre-mRNA-splicing factor 38, putative                         | -0,5784 | 0,01059    |
| TcCLB.508153.820 | inorganic pyrophosphatase, putative                           | -0,5788 | 0,00007249 |
| TcCLB.507091.150 | hypothetical protein, conserved (pseudogene)                  | -0,5788 | 0,0005135  |
| TcCLB.506945.160 | S-adenosylmethionine synthetase, putative (METK1)             | -0,5792 | 1,574E-13  |

|                  |                                                             |         |            |
|------------------|-------------------------------------------------------------|---------|------------|
| TcCLB.508909.260 | hypothetical protein, conserved                             | -0,5793 | 0,009746   |
| TcCLB.508165.350 | mucin-associated surface protein (MASP), putative           | -0,5793 | 0,1772     |
| TcCLB.511425.10  | serine/threonine protein phosphatase 2A regulatory subun    | -0,5794 | 0,002173   |
| TcCLB.509319.10  | hypothetical protein, conserved                             | -0,5798 | 0,00005699 |
| TcCLB.510963.5   | hypothetical protein, conserved (fragment)                  | -0,5798 | 0,007171   |
| TcCLB.511051.20  | hypothetical protein, conserved                             | -0,5803 | 0,00008924 |
| TcCLB.510303.299 | hypothetical protein                                        | -0,5805 | 0,00002384 |
| TcCLB.507005.10  | hypothetical protein                                        | -0,5805 | 0,0198     |
| TcCLB.506175.5   | hypothetical protein, conserved                             | -0,5808 | 0,002508   |
| TcCLB.505983.9   | tryparedoxin peroxidase, putative                           | -0,5812 | 6,272E-08  |
| TcCLB.508909.40  | hypothetical protein, conserved                             | -0,5812 | 1,138E-06  |
| TcCLB.504251.30  | hypothetical protein, conserved                             | -0,5813 | 6,416E-07  |
| TcCLB.510475.110 | mucin TcMUCII, putative                                     | -0,5813 | 0,2596     |
| TcCLB.506855.280 | DNA repair and recombination helicase protein PIF6, putat   | -0,5814 | 3,757E-08  |
| TcCLB.473619.9   | dispersed gene family protein 1 (DGF-1), putative (fragme   | -0,5815 | 0,3286     |
| TcCLB.506767.215 | hypothetical protein, conserved (pseudogene)                | -0,5815 | 0,4261     |
| TcCLB.510081.40  | trans-sialidase (pseudogene), putative                      | -0,5816 | 0,6063     |
| TcCLB.510607.29  | dispersed gene family protein 1 (DGF-1), putative (fragme   | -0,5817 | 0,0107     |
| TcCLB.506469.70  | hypothetical protein                                        | -0,5818 | 0,01549    |
| TcCLB.510189.51  | elongation factor 1-gamma (EF-1-gamma, pseudogene), p       | -0,5818 | 0,2768     |
| TcCLB.506643.10  | mucin-associated surface protein (MASP), putative           | -0,5819 | 0,5051     |
| TcCLB.511315.9   | ATP-dependent RNA helicase, putative                        | -0,5824 | 0,001191   |
| TcCLB.506625.140 | hypothetical protein, conserved                             | -0,5826 | 0,00001827 |
| TcCLB.506739.20  | hypothetical protein, conserved                             | -0,5828 | 9,797E-09  |
| TcCLB.504167.30  | protein kinase, putative                                    | -0,5829 | 0,00006969 |
| TcCLB.507897.20  | squalene synthase, putative                                 | -0,5831 | 1,83E-20   |
| TcCLB.510689.50  | cell differentiation protein, putative                      | -0,5831 | 7,347E-07  |
| TcCLB.511529.9   | hypothetical protein, conserved                             | -0,5832 | 2,191E-08  |
| TcCLB.503797.10  | hypothetical protein, conserved                             | -0,5835 | 0,002791   |
| TcCLB.508409.280 | hypothetical protein, conserved                             | -0,5836 | 0,0001165  |
| TcCLB.507689.10  | dihydrouridine synthase (Dus, pseudogene), putative         | -0,5836 | 0,01397    |
| TcCLB.504039.170 | mucin-associated surface protein (MASP, pseudogene), pu     | -0,5837 | 0,258      |
| TcCLB.509205.30  | eukaryotic translation initiation factor, putative          | -0,5838 | 1,871E-07  |
| TcCLB.510259.50  | 21 kDa cyclophilin, putative (CYP21)                        | -0,5839 | 7,149E-08  |
| TcCLB.503527.4   | hypothetical protein, conserved (pseudogene)                | -0,5839 | 1,201E-07  |
| TcCLB.507507.20  | ADP-ribosylation factor GTPase activating protein 1, putati | -0,5839 | 1,727E-06  |
| TcCLB.511481.10  | hypothetical protein, conserved                             | -0,5839 | 0,0003854  |
| TcCLB.503859.25  | surface protease GP63 (pseudogene), putative                | -0,5839 | 0,3338     |
| TcCLB.506821.90  | hypothetical protein, conserved                             | -0,5841 | 0,00000211 |
| TcCLB.510421.50  | hypothetical protein, conserved                             | -0,5844 | 1,066E-06  |
| TcCLB.503865.40  | hypothetical protein, conserved                             | -0,5844 | 0,00008309 |
| TcCLB.509681.10  | hypothetical protein, conserved                             | -0,5844 | 0,2386     |
| TcCLB.504179.60  | hypothetical protein, conserved                             | -0,5847 | 2,898E-07  |
| TcCLB.506655.20  | polyubiquitin (pseudogene), putative                        | -0,5847 | 0,04424    |
| TcCLB.506883.50  | Present in the outer mitochondrial membrane proteome 5      | -0,5848 | 3,682E-07  |

|                  |                                                               |         |            |
|------------------|---------------------------------------------------------------|---------|------------|
| TcCLB.440363.19  | Vacuolar iron transporter 1, putative (fragment) (VIT1)       | -0,5848 | 0,000256   |
| TcCLB.509657.50  | mucin-associated surface protein (MASP), putative             | -0,5848 | 0,281      |
| TcCLB.509105.140 | heat shock protein 85, putative                               | -0,5849 | 1,043E-08  |
| TcCLB.508479.380 | hypothetical protein, conserved                               | -0,5849 | 4,334E-07  |
| TcCLB.511353.20  | hypothetical protein, conserved                               | -0,585  | 1,569E-07  |
| TcCLB.508999.170 | surface protease GP63, putative                               | -0,5851 | 0,7842     |
| TcCLB.511493.10  | quiescin sulfhydryl oxidase, putative (QSOX)                  | -0,5855 | 0,0000312  |
| TcCLB.509395.20  | phosphatidylinositol kinase related protein, putative         | -0,5857 | 7,324E-13  |
| TcCLB.510329.30  | hypothetical protein, conserved                               | -0,5857 | 1,479E-07  |
| TcCLB.505037.60  | NIMA/Nek Serine/threonine-protein kinase family, putative     | -0,5859 | 9,278E-07  |
| TcCLB.508693.80  | ruvB-like DNA helicase, putative                              | -0,586  | 7,953E-13  |
| TcCLB.509023.130 | DNA replication licensing factor MCM4, putative (MCM4)        | -0,5862 | 3,244E-07  |
| TcCLB.510667.40  | DNA repair protein RAD2, putative                             | -0,5867 | 3,649E-07  |
| TcCLB.506251.40  | hypothetical protein                                          | -0,5871 | 1,75E-09   |
| TcCLB.508431.10  | dispersed gene family protein 1 (DGF-1, pseudogene), putative | -0,5877 | 0,001235   |
| TcCLB.507789.9   | dispersed gene family protein 1 (DGF-1), putative (fragment)  | -0,5877 | 0,03041    |
| TcCLB.510013.70  | mucin-associated surface protein (MASP), putative             | -0,5877 | 0,3121     |
| TcCLB.508153.30  | Protein tilB homolog, putative (LRTP)                         | -0,5881 | 0,00005876 |
| TcCLB.506595.10  | dispersed gene family protein 1 (DGF-1), putative             | -0,5881 | 0,02103    |
| TcCLB.504431.10  | hypothetical protein, conserved                               | -0,5885 | 2,525E-07  |
| TcCLB.508431.60  | hypothetical protein, conserved (pseudogene)                  | -0,5886 | 0,04009    |
| TcCLB.509345.20  | trans-sialidase (pseudogene), putative                        | -0,5887 | 0,04097    |
| TcCLB.508153.850 | hypothetical protein, conserved                               | -0,5889 | 3,763E-10  |
| TcCLB.509619.20  | hypothetical protein, conserved (pseudogene)                  | -0,589  | 0,003347   |
| TcCLB.511745.50  | hypothetical protein, conserved                               | -0,589  | 0,003599   |
| TcCLB.511183.409 | mucin TcMUC (pseudogene), putative                            | -0,5892 | 0,1656     |
| TcCLB.507483.4   | polyubiquitin (pseudogene), putative                          | -0,5894 | 0,0164     |
| TcCLB.509503.9   | dispersed gene family protein 1 (DGF-1), putative (fragment)  | -0,5894 | 0,09837    |
| TcCLB.508953.28  | hypothetical protein, conserved                               | -0,5896 | 0,0002709  |
| TcCLB.508163.181 | hypothetical protein, conserved (pseudogene)                  | -0,5896 | 0,1339     |
| TcCLB.504449.14  | hypothetical protein, conserved (fragment)                    | -0,5898 | 3,359E-14  |
| TcCLB.508823.50  | 40S ribosomal protein S14, putative                           | -0,59   | 2,241E-15  |
| TcCLB.507211.40  | inosine-5'-monophosphate dehydrogenase, putative              | -0,59   | 1,402E-14  |
| TcCLB.511041.30  | hypothetical protein, conserved                               | -0,5903 | 1,698E-11  |
| TcCLB.510257.30  | ribulose-5-phosphate 3-epimerase, putative                    | -0,5903 | 0,0001048  |
| TcCLB.508727.24  | hypothetical protein                                          | -0,5904 | 2,89E-10   |
| TcCLB.507011.50  | Pre-rRNA-processing protein PNO1, putative (PNO1)             | -0,5906 | 3,398E-06  |
| TcCLB.508625.100 | hypothetical protein, conserved (pseudogene)                  | -0,5909 | 5,17E-07   |
| TcCLB.507053.140 | hypothetical protein, conserved                               | -0,5909 | 0,00008807 |
| TcCLB.510661.270 | replication factor C, subunit 3, putative                     | -0,5911 | 0,00001578 |
| TcCLB.504261.100 | mucin-associated surface protein (MASP, pseudogene), putative | -0,5913 | 0,1599     |
| TcCLB.503819.20  | DNA-directed RNA polymerase III subunit, putative             | -0,5914 | 0,004018   |
| TcCLB.505163.80  | oligosaccharyl transferase subunit, putative                  | -0,5916 | 8,978E-22  |
| TcCLB.508851.154 | hypothetical protein, conserved                               | -0,5917 | 0,02275    |
| TcCLB.504207.10  | hypothetical protein, conserved                               | -0,5918 | 0,00001179 |

|                  |                                                                |         |            |
|------------------|----------------------------------------------------------------|---------|------------|
| TcCLB.508209.10  | hypothetical protein, conserved (pseudogene)                   | -0,5918 | 0,02069    |
| TcCLB.507785.20  | proteasome subunit alpha type-1, putative (fragment) (PS)      | -0,5918 | 0,2017     |
| TcCLB.506227.220 | hypothetical protein, conserved                                | -0,5921 | 2,596E-08  |
| TcCLB.507621.10  | retrotransposon hot spot protein (RHS, pseudogene), putative   | -0,5921 | 0,04263    |
| TcCLB.506275.90  | hypothetical protein, conserved                                | -0,5922 | 0,00001007 |
| TcCLB.506305.40  | kinesin, putative                                              | -0,5922 | 0,01342    |
| TcCLB.507757.40  | hypothetical protein                                           | -0,5926 | 2,705E-08  |
| TcCLB.511459.50  | hypothetical protein, conserved                                | -0,5932 | 0,0002209  |
| TcCLB.506245.110 | dispersed gene family protein 1 (DGF-1, pseudogene), putative  | -0,5933 | 0,1032     |
| TcCLB.511755.60  | ATP-dependent RNA helicase, putative                           | -0,5934 | 5,365E-14  |
| TcCLB.503897.120 | hypothetical protein, conserved                                | -0,5934 | 4,795E-08  |
| TcCLB.510303.50  | deoxyribose-phosphate aldolase, putative                       | -0,5936 | 5,995E-07  |
| TcCLB.510163.40  | surface protease GP63 (pseudogene), putative                   | -0,5936 | 0,00002739 |
| TcCLB.510465.140 | mucin-associated surface protein (MASP), putative              | -0,5936 | 0,1275     |
| TcCLB.510311.130 | DNA repair helicase, putative                                  | -0,5939 | 5,189E-09  |
| TcCLB.507681.250 | hypothetical protein, conserved                                | -0,5941 | 4,831E-06  |
| TcCLB.506445.70  | hypothetical protein, conserved                                | -0,5942 | 8,005E-06  |
| TcCLB.508175.270 | hypothetical protein                                           | -0,5945 | 0,0002175  |
| TcCLB.510129.30  | procyclic form surface phosphoprotein, putative                | -0,5946 | 1,916E-08  |
| TcCLB.511619.10  | hypothetical protein, conserved                                | -0,5946 | 0,0002091  |
| TcCLB.506501.210 | surface protease GP63 (pseudogene), putative                   | -0,5946 | 0,3612     |
| TcCLB.510971.60  | protein kinase, putative                                       | -0,5948 | 1,508E-06  |
| TcCLB.510879.130 | hypothetical protein, conserved                                | -0,5948 | 7,382E-06  |
| TcCLB.506885.489 | dispersed gene family protein 1 (DGF-1), putative              | -0,595  | 0,006769   |
| TcCLB.506585.40  | glucose-regulated protein 78, putative                         | -0,5953 | 1,084E-16  |
| TcCLB.511295.30  | hypothetical protein, conserved                                | -0,5953 | 6,484E-12  |
| TcCLB.509161.135 | hypothetical protein, conserved                                | -0,5954 | 0,00005502 |
| TcCLB.509915.20  | dispersed gene family protein 1 (DGF-1), putative              | -0,5955 | 0,002621   |
| TcCLB.511805.29  | 2,3-bisphosphoglycerate-independent phosphoglycerate m         | -0,5957 | 0,009087   |
| TcCLB.508601.70  | hypothetical protein, conserved                                | -0,5959 | 0,00005908 |
| TcCLB.509265.23  | N-acetyltransferase complex ARD1 subunit (pseudogene),         | -0,5959 | 0,06064    |
| TcCLB.507515.130 | hypothetical protein, conserved                                | -0,596  | 0,000124   |
| TcCLB.511197.10  | trans-sialidase, putative                                      | -0,5961 | 0,07755    |
| TcCLB.506805.20  | hypothetical protein                                           | -0,5961 | 0,1202     |
| TcCLB.509399.100 | hypothetical protein, conserved                                | -0,5963 | 5,244E-10  |
| TcCLB.504883.70  | hypothetical protein, conserved (pseudogene)                   | -0,5964 | 6,65E-17   |
| TcCLB.504261.40  | mucin-associated surface protein (MASP), putative              | -0,5965 | 0,1187     |
| TcCLB.507839.30  | dispersed gene family protein 1 (DGF-1), putative              | -0,5965 | 0,2367     |
| TcCLB.508157.10  | serine-alanine-and proline-rich protein (pseudogene), putative | -0,5968 | 0,04548    |
| TcCLB.506961.97  | N-acetyltransferase complex ARD1 subunit (pseudogene),         | -0,5968 | 0,09944    |
| TcCLB.506789.290 | hypothetical protein, conserved                                | -0,5973 | 8,234E-10  |
| TcCLB.506357.150 | hypothetical protein, conserved                                | -0,5974 | 3,218E-08  |
| TcCLB.509109.150 | hypothetical protein, conserved                                | -0,5975 | 0,0003088  |
| TcCLB.508873.460 | mucin-associated surface protein (MASP), putative              | -0,5975 | 0,002771   |
| TcCLB.507929.20  | co-chaperone GrpE, putative                                    | -0,5976 | 1,217E-08  |

|                  |                                                            |         |            |
|------------------|------------------------------------------------------------|---------|------------|
| TcCLB.511499.50  | ubiquitin hydrolase, putative                              | -0,5977 | 1,787E-08  |
| TcCLB.506179.40  | hypothetical protein, conserved                            | -0,5977 | 0,00001081 |
| TcCLB.507063.90  | mitochondrial DNA polymerase beta, putative                | -0,5979 | 3,856E-11  |
| TcCLB.504229.30  | protein kinase, putative                                   | -0,598  | 9,231E-08  |
| TcCLB.511211.80  | hypothetical protein, conserved                            | -0,598  | 9,552E-06  |
| TcCLB.508707.210 | DNA replication licensing factor MCM7, putative            | -0,5981 | 1,132E-08  |
| TcCLB.511281.50  | surface protease GP63, putative                            | -0,5982 | 0,001505   |
| TcCLB.506509.20  | hypothetical protein, conserved                            | -0,5984 | 0,0004754  |
| TcCLB.511277.370 | phosphatidic acid phosphatase, putative                    | -0,5984 | 0,0006814  |
| TcCLB.509179.180 | zinc-finger protein ZPR1, putative                         | -0,5987 | 1,092E-07  |
| TcCLB.511189.80  | small nuclear ribonucleoprotein SmD2, putative             | -0,5987 | 2,037E-06  |
| TcCLB.504045.130 | kinesin, putative (fragment)                               | -0,5987 | 0,03924    |
| TcCLB.510443.20  | hypothetical protein, conserved                            | -0,5989 | 0,00001197 |
| TcCLB.508719.9   | hypothetical protein, conserved                            | -0,599  | 7,401E-13  |
| TcCLB.510053.20  | hypothetical protein, conserved                            | -0,599  | 5,454E-08  |
| TcCLB.509671.110 | hypothetical protein, conserved                            | -0,5991 | 2,862E-06  |
| TcCLB.508815.110 | serine/threonine protein phosphatase catalytic subunit, pu | -0,5992 | 1,789E-11  |
| TcCLB.511267.40  | hypothetical protein, conserved                            | -0,5992 | 0,04291    |
| TcCLB.506941.229 | pre-mRNA cleavage complex II Clp1 protein, putative        | -0,5994 | 5,136E-07  |
| TcCLB.507023.30  | pseudouridine synthase A-like protein, putative            | -0,5996 | 1,713E-07  |
| TcCLB.508903.10  | trans-sialidase (pseudogene), putative                     | -0,5997 | 0,04698    |
| TcCLB.503541.10  | hypothetical protein, conserved                            | -0,5998 | 0,00005816 |
| TcCLB.508825.30  | surface protease GP63 (pseudogene), putative               | -0,6001 | 0,00003429 |
| TcCLB.506945.359 | damage-specific DNA binding protein, putative              | -0,6006 | 2,713E-08  |
| TcCLB.509233.170 | hypothetical protein, conserved                            | -0,6007 | 0,0005483  |
| TcCLB.510449.20  | hypothetical protein, conserved (pseudogene)               | -0,6009 | 0,1949     |
| TcCLB.509259.10  | trans-sialidase (pseudogene), putative                     | -0,6012 | 0,04538    |
| TcCLB.510059.10  | dispersed gene family protein 1 (DGF-1), putative          | -0,6012 | 0,1535     |
| TcCLB.407477.44  | hypothetical protein, conserved                            | -0,6013 | 0,01223    |
| TcCLB.510735.70  | hypothetical protein, conserved                            | -0,6014 | 0,00001338 |
| TcCLB.472777.30  | protein disulfide isomerase, putative                      | -0,6014 | 0,00277    |
| TcCLB.506481.20  | hypothetical protein, conserved                            | -0,6022 | 7,251E-19  |
| TcCLB.510089.90  | hypothetical protein, conserved                            | -0,6026 | 4,146E-06  |
| TcCLB.509509.40  | hypothetical protein, conserved                            | -0,6029 | 0,00745    |
| TcCLB.506691.30  | hypothetical protein, conserved                            | -0,603  | 3,759E-15  |
| TcCLB.511733.110 | GTPase activating protein of Rab-like GTPase, putative     | -0,6033 | 4,357E-06  |
| TcCLB.509007.10  | hypothetical protein, conserved                            | -0,6034 | 1,047E-08  |
| TcCLB.511499.20  | hypothetical protein, conserved                            | -0,6034 | 2,119E-06  |
| TcCLB.510679.14  | hypothetical protein, conserved                            | -0,6034 | 0,008993   |
| TcCLB.511299.70  | mitogen-activated protein kinase, putative                 | -0,6035 | 8,955E-08  |
| TcCLB.503755.10  | DNA polymerase kappa, putative                             | -0,6038 | 2,972E-07  |
| TcCLB.506363.130 | hypothetical protein, conserved                            | -0,6039 | 0,00001312 |
| TcCLB.507927.30  | hypothetical protein, conserved                            | -0,6042 | 0,0002781  |
| TcCLB.508181.30  | hypothetical protein, conserved                            | -0,6043 | 3,553E-14  |
| TcCLB.511365.80  | mitochondrial carrier protein, putative                    | -0,6046 | 2,911E-06  |

|                  |                                                              |         |            |
|------------------|--------------------------------------------------------------|---------|------------|
| TcCLB.507735.10  | hypothetical protein, conserved                              | -0,6047 | 0,004708   |
| TcCLB.510729.40  | hypothetical protein, conserved                              | -0,6051 | 0,0001351  |
| TcCLB.511283.220 | hypothetical protein, conserved                              | -0,6052 | 1,2E-11    |
| TcCLB.507395.14  | hypothetical protein, conserved                              | -0,6052 | 7,625E-06  |
| TcCLB.508121.155 | mucin TcMUCII (pseudogene), putative                         | -0,6053 | 0,1792     |
| TcCLB.511903.200 | hypothetical protein, conserved                              | -0,6055 | 6,58E-07   |
| TcCLB.506737.20  | protein kinase, putative                                     | -0,6056 | 5,783E-08  |
| TcCLB.503861.100 | trans-sialidase (pseudogene), putative                       | -0,6057 | 0,0009145  |
| TcCLB.510329.100 | leucine-rich repeat protein, putative                        | -0,6058 | 1,113E-07  |
| TcCLB.508187.10  | vacuolar protein sorting-associated protein, putative (fragr | -0,606  | 1,785E-06  |
| TcCLB.507873.20  | cell differentiation protein, putative                       | -0,606  | 4,718E-06  |
| TcCLB.507017.64  | hypothetical protein, conserved                              | -0,606  | 0,0006376  |
| TcCLB.503779.70  | hypothetical protein, conserved                              | -0,6061 | 0,007113   |
| TcCLB.510819.10  | Eukaryotic translation initiation factor 4 gamma type 1, pu  | -0,6062 | 4,087E-09  |
| TcCLB.511903.140 | tubulin folding cofactor D (pseudogene), putative            | -0,6065 | 1,965E-12  |
| TcCLB.509751.20  | hypothetical protein, conserved                              | -0,6068 | 9,272E-08  |
| TcCLB.503489.20  | hypothetical protein, conserved                              | -0,6068 | 0,00002559 |
| TcCLB.509573.40  | hypothetical protein, conserved                              | -0,6068 | 0,01234    |
| TcCLB.507381.31  | retrotransposon hot spot protein (RHS, pseudogene), putat    | -0,6071 | 1,659E-06  |
| TcCLB.410199.20  | hypothetical protein                                         | -0,6071 | 0,02276    |
| TcCLB.509527.10  | mucin TcMUCII, putative                                      | -0,6072 | 0,186      |
| TcCLB.511189.100 | hypothetical protein, conserved                              | -0,6075 | 1,856E-06  |
| TcCLB.504113.30  | hypothetical protein, conserved                              | -0,6075 | 0,001046   |
| TcCLB.506753.100 | hypothetical protein, conserved                              | -0,6076 | 0,003368   |
| TcCLB.504021.20  | hypothetical protein, conserved                              | -0,6076 | 0,08306    |
| TcCLB.504203.4   | hypothetical protein, conserved                              | -0,6077 | 6,478E-06  |
| TcCLB.507211.30  | hypothetical protein, conserved                              | -0,608  | 0,00005948 |
| TcCLB.508831.30  | hypothetical protein, conserved                              | -0,608  | 0,00008414 |
| TcCLB.506955.79  | surface protease GP63 (pseudogene), putative                 | -0,6082 | 0,2127     |
| TcCLB.506577.10  | hypothetical protein, conserved                              | -0,6083 | 0,0007624  |
| TcCLB.506173.179 | trans-sialidase (pseudogene), putative                       | -0,6084 | 0,02104    |
| TcCLB.402857.20  | hypothetical protein                                         | -0,6085 | 4,459E-13  |
| TcCLB.506885.170 | hypothetical protein, conserved                              | -0,6085 | 0,00003576 |
| TcCLB.510743.10  | ubiquitin-activating enzyme E1, putative                     | -0,6089 | 1,043E-10  |
| TcCLB.511043.30  | DnaJ chaperone protein, putative (TcJ6)                      | -0,6089 | 5,167E-10  |
| TcCLB.507643.50  | dispersed gene family protein 1 (DGF-1), putative            | -0,6089 | 0,0000474  |
| TcCLB.503971.59  | hypothetical protein, conserved (fragment)                   | -0,6089 | 0,00007025 |
| TcCLB.510769.100 | hypothetical protein, conserved                              | -0,6091 | 1,127E-07  |
| TcCLB.508307.140 | hypothetical protein, conserved                              | -0,6092 | 1,832E-07  |
| TcCLB.507711.320 | DNA mismatch repair protein MSH2, putative (MSH2)            | -0,6093 | 2,195E-12  |
| TcCLB.506713.40  | N-acetyltransferase complex ARD1 subunit, putative           | -0,6093 | 0,002637   |
| TcCLB.511603.141 | syntaxin binding protein (pseudogene), putative              | -0,6093 | 0,2004     |
| TcCLB.510089.10  | mucin-associated surface protein (MASP), putative            | -0,6094 | 0,06973    |
| TcCLB.508879.10  | hypothetical protein, conserved                              | -0,6095 | 3,945E-07  |
| TcCLB.505073.20  | hypothetical protein                                         | -0,6097 | 1,145E-10  |



|                  |                                                               |         |            |
|------------------|---------------------------------------------------------------|---------|------------|
| TcCLB.510647.20  | hypothetical protein, conserved                               | -0,6097 | 2,195E-08  |
| TcCLB.507837.60  | Suppressor of G2 allele of SKP1, putative                     | -0,6098 | 6,992E-06  |
| TcCLB.508233.25  | hypothetical protein                                          | -0,6098 | 0,00009996 |
| TcCLB.510635.50  | zinc-binding phosphatase, putative                            | -0,6099 | 1,865E-07  |
| TcCLB.507787.10  | kinesin-like protein (pseudogene), putative                   | -0,6099 | 0,00002764 |
| TcCLB.408573.5   | hypothetical protein                                          | -0,6099 | 0,2039     |
| TcCLB.506131.151 | elongation factor 1-gamma (EF-1-gamma, pseudogene), p         | -0,61   | 0,312      |
| TcCLB.510291.40  | serine/threonine protein kinase, putative                     | -0,6102 | 0,003949   |
| TcCLB.507633.90  | hypothetical protein                                          | -0,6103 | 0,1274     |
| TcCLB.508761.130 | hypothetical protein                                          | -0,6103 | 0,3473     |
| TcCLB.509945.10  | ERAD-associated E3 ubiquitin-protein ligase HRD1, putative    | -0,6104 | 2,199E-10  |
| TcCLB.511715.20  | protein kinase, putative                                      | -0,6106 | 9,512E-07  |
| TcCLB.511867.30  | hypothetical protein, conserved                               | -0,6106 | 0,00006569 |
| TcCLB.503579.10  | hypothetical protein, conserved                               | -0,611  | 2,833E-07  |
| TcCLB.504081.530 | mucin-associated surface protein (MASP), putative             | -0,611  | 0,2247     |
| TcCLB.506725.80  | hypothetical protein, conserved                               | -0,6111 | 8,176E-07  |
| TcCLB.508221.420 | mucin-associated surface protein (MASP), putative             | -0,6113 | 0,2035     |
| TcCLB.511185.130 | dispersed gene family protein 1 (DGF-1), putative             | -0,6115 | 0,07157    |
| TcCLB.506665.10  | hypothetical protein                                          | -0,6116 | 0,2133     |
| TcCLB.508707.40  | hypothetical protein, conserved                               | -0,6118 | 2,374E-09  |
| TcCLB.510437.79  | heat shock protein 70, putative                               | -0,6119 | 0,0003619  |
| TcCLB.507895.50  | dispersed gene family protein 1 (DGF-1, pseudogene), putative | -0,6119 | 0,1535     |
| TcCLB.506679.260 | hypothetical protein, conserved                               | -0,6122 | 9,326E-09  |
| TcCLB.508817.80  | protein kinase, putative                                      | -0,6124 | 7,566E-06  |
| TcCLB.509065.124 | U6 snRNA-associated Sm-like protein LSm5p                     | -0,6124 | 0,002983   |
| TcCLB.511229.110 | glycyl-tRNA synthetase, putative                              | -0,6126 | 6,681E-13  |
| TcCLB.507941.110 | hypothetical protein, conserved                               | -0,6127 | 2,974E-06  |
| TcCLB.508579.30  | kinesin, putative                                             | -0,6128 | 0,00001429 |
| TcCLB.421621.35  | surface protease GP63 (pseudogene), putative                  | -0,6128 | 0,2736     |
| TcCLB.509965.250 | ubiquitin fusion degradation protein 2, putative              | -0,6129 | 4,714E-13  |
| TcCLB.508699.10  | DNA topoisomerase II, putative                                | -0,613  | 9,008E-15  |
| TcCLB.510311.150 | mitochondrial protein 99, putative (MP99)                     | -0,613  | 1,779E-08  |
| TcCLB.506947.20  | hypothetical protein, conserved                               | -0,6132 | 2,668E-08  |
| TcCLB.507237.89  | mucin TcMUCII, putative                                       | -0,6133 | 0,3913     |
| TcCLB.511425.30  | hypothetical protein, conserved                               | -0,6137 | 4,825E-06  |
| TcCLB.510821.50  | replication Factor A 28 kDa subunit, putative                 | -0,6138 | 9,01E-11   |
| TcCLB.509719.20  | ATP-dependent DEAD/H RNA helicase, putative                   | -0,6142 | 4,163E-09  |
| TcCLB.442297.10  | ARP2/3 complex 16kDa subunit, putative                        | -0,6145 | 0,0001402  |
| TcCLB.508221.20  | trans-sialidase (pseudogene), putative                        | -0,6146 | 0,01154    |
| TcCLB.510275.180 | elongation factor 1-gamma (EF-1-gamma), putative              | -0,6146 | 0,2987     |
| TcCLB.510351.120 | Nudix hydrolase 2, putative (Nudix2)                          | -0,6147 | 3,608E-06  |
| TcCLB.507517.100 | pseudouridylate synthase I, putative                          | -0,6147 | 9,155E-06  |
| TcCLB.509965.380 | dTDP-glucose 4,6-dehydratase, putative                        | -0,6148 | 5,833E-09  |
| TcCLB.510733.60  | DNA polymerase epsilon catalytic subunit, putative            | -0,6149 | 1,708E-12  |
| TcCLB.509991.29  | cyclophilin 15, putative                                      | -0,615  | 1,338E-06  |

|                  |                                                       |         |            |
|------------------|-------------------------------------------------------|---------|------------|
| TcCLB.407477.30  | diphthine synthase, putative                          | -0,6151 | 0,00003046 |
| TcCLB.510693.50  | trans-sialidase (pseudogene), putative                | -0,6151 | 0,07106    |
| TcCLB.508693.40  | hypothetical protein, conserved                       | -0,6152 | 2,351E-10  |
| TcCLB.510275.390 | mucin TcMUCII (pseudogene), putative                  | -0,6154 | 0,2603     |
| TcCLB.506255.20  | hypothetical protein, conserved                       | -0,6155 | 0,0006117  |
| TcCLB.504147.10  | hypothetical protein, conserved                       | -0,6157 | 1,759E-11  |
| TcCLB.508293.100 | chitin-binding like protein, putative                 | -0,6157 | 0,2423     |
| TcCLB.508661.50  | ribonuclease H, putative                              | -0,6158 | 0,00006618 |
| TcCLB.510021.220 | trans-sialidase, Group V, putative                    | -0,6158 | 0,01243    |
| TcCLB.506247.140 | hypothetical protein, conserved                       | -0,6159 | 5,196E-09  |
| TcCLB.511115.10  | hypothetical protein, conserved                       | -0,6161 | 1,101E-09  |
| TcCLB.511255.330 | mucin-associated surface protein (MASP), putative     | -0,6161 | 0,2708     |
| TcCLB.507687.10  | trans-sialidase, putative                             | -0,6162 | 0,01519    |
| TcCLB.507019.140 | CDC16, putative                                       | -0,6164 | 5,962E-07  |
| TcCLB.506753.30  | hypothetical protein                                  | -0,6164 | 0,0001149  |
| TcCLB.504741.100 | hypothetical protein, conserved                       | -0,6165 | 3,465E-11  |
| TcCLB.508845.9   | dispersed gene family protein 1 (DGF-1), putative     | -0,6165 | 0,05927    |
| TcCLB.509525.280 | hypothetical protein                                  | -0,6165 | 0,2602     |
| TcCLB.508891.130 | hypothetical protein, conserved                       | -0,6166 | 1,208E-10  |
| TcCLB.505935.30  | dispersed gene family protein 1 (DGF-1), putative     | -0,6166 | 0,1218     |
| TcCLB.511633.60  | structural maintenance of chromosome (SMC), putative  | -0,617  | 1,191E-16  |
| TcCLB.507063.250 | hypothetical protein                                  | -0,6171 | 0,003957   |
| TcCLB.508741.110 | hypothetical protein, conserved                       | -0,6172 | 3,216E-06  |
| TcCLB.507099.70  | hypothetical protein, conserved                       | -0,6173 | 1,593E-11  |
| TcCLB.510689.30  | proteasome beta 7 subunit, putative                   | -0,6173 | 9,849E-11  |
| TcCLB.506363.140 | hypothetical protein, conserved                       | -0,6176 | 0,00009197 |
| TcCLB.510769.130 | kinesin, putative                                     | -0,6181 | 9,471E-09  |
| TcCLB.504147.260 | hypothetical protein, conserved                       | -0,6185 | 3,125E-08  |
| TcCLB.507681.189 | hypothetical protein, conserved                       | -0,6186 | 0,00005388 |
| TcCLB.508147.70  | trans-sialidase (pseudogene), putative                | -0,6186 | 0,1131     |
| TcCLB.508365.40  | mucin-associated surface protein (MASP), putative     | -0,6186 | 0,2285     |
| TcCLB.511435.20  | Replication Factor C Subunit 1-related protein        | -0,6187 | 7,47E-08   |
| TcCLB.504059.20  | endomembrane protein, putative                        | -0,6188 | 1,691E-10  |
| TcCLB.506357.20  | hypothetical protein, conserved                       | -0,6189 | 2,576E-08  |
| TcCLB.509643.139 | Heat shock protein 83, putative                       | -0,619  | 5,995E-09  |
| TcCLB.509099.20  | hypothetical protein, conserved                       | -0,6193 | 1,143E-10  |
| TcCLB.506393.143 | ATP-dependent DEAD/H RNA helicase (pseudogene), putat | -0,6194 | 0,02168    |
| TcCLB.506355.120 | hypothetical protein, conserved                       | -0,6196 | 1,543E-11  |
| TcCLB.511197.60  | mucin-associated surface protein (MASP), putative     | -0,62   | 0,02428    |
| TcCLB.508607.30  | dispersed gene family protein 1 (DGF-1), putative     | -0,6201 | 0,00478    |
| TcCLB.509065.100 | hypothetical protein, conserved                       | -0,6203 | 0,0002391  |
| TcCLB.510373.110 | hypothetical protein                                  | -0,6203 | 0,328      |
| TcCLB.511481.30  | hypothetical protein, conserved                       | -0,6204 | 0,00009136 |
| TcCLB.508737.140 | hypothetical protein, conserved                       | -0,6206 | 1,166E-08  |
| TcCLB.509005.60  | hypothetical protein, conserved                       | -0,6207 | 3,439E-07  |

|                  |                                                                 |         |            |
|------------------|-----------------------------------------------------------------|---------|------------|
| TcCLB.506743.100 | hypothetical protein, conserved                                 | -0,6209 | 0,01473    |
| TcCLB.511389.114 | hypothetical protein, conserved                                 | -0,621  | 0,01443    |
| TcCLB.511353.50  | hypothetical protein, conserved                                 | -0,6212 | 0,0001581  |
| TcCLB.508317.70  | hypothetical protein                                            | -0,6217 | 2,692E-12  |
| TcCLB.510901.100 | DNA topoisomerase III, putative                                 | -0,6217 | 1,686E-11  |
| TcCLB.508285.30  | ATP-dependent DEAD/H RNA helicase (pseudogene), putative        | -0,6218 | 0,2287     |
| TcCLB.510493.10  | hypothetical protein, conserved                                 | -0,6221 | 0,001695   |
| TcCLB.508741.290 | ribosomal RNA methyltransferase, putative                       | -0,6223 | 8,023E-10  |
| TcCLB.510161.20  | hypothetical protein, conserved                                 | -0,6224 | 9,466E-15  |
| TcCLB.507951.250 | tRNA isopentenyltransferase, putative                           | -0,6224 | 4,336E-07  |
| TcCLB.511285.50  | hypothetical protein, conserved                                 | -0,6225 | 5,378E-14  |
| TcCLB.506677.10  | ubiquitin-like protein, putative                                | -0,6226 | 3,927E-13  |
| TcCLB.509509.60  | small GTP-binding protein, putative                             | -0,6226 | 5,576E-08  |
| TcCLB.506303.70  | hypothetical protein, conserved                                 | -0,6229 | 5,409E-09  |
| TcCLB.511031.20  | hypothetical protein, conserved                                 | -0,6229 | 0,00000742 |
| TcCLB.506659.20  | mitochondrial DNA polymerase I protein C, putative              | -0,6231 | 1,886E-17  |
| TcCLB.508643.40  | hypothetical protein, conserved                                 | -0,6232 | 5,709E-14  |
| TcCLB.472253.10  | vacuolar protein sorting complex subunit (pseudogene), putative | -0,6232 | 0,0001011  |
| TcCLB.506165.4   | hypothetical protein, conserved                                 | -0,6235 | 7,494E-06  |
| TcCLB.507253.50  | ATP-dependent DEAD/H RNA helicase (pseudogene), putative        | -0,6235 | 0,2541     |
| TcCLB.506435.470 | hypothetical protein, conserved                                 | -0,6238 | 0,003137   |
| TcCLB.506355.110 | hypothetical protein, conserved                                 | -0,6239 | 6,753E-12  |
| TcCLB.511179.100 | monothiol glutaredoxin, putative                                | -0,6241 | 4,476E-07  |
| TcCLB.507611.260 | trans-sialidase (pseudogene), putative                          | -0,6241 | 0,105      |
| TcCLB.506789.230 | hypothetical protein, conserved                                 | -0,6244 | 8,079E-18  |
| TcCLB.511417.100 | anti-silencing protein ASF 1, putative                          | -0,6244 | 0,004059   |
| TcCLB.510089.50  | hypothetical protein, conserved                                 | -0,6246 | 5,505E-08  |
| TcCLB.508445.30  | protein kinase, putative                                        | -0,625  | 1,031E-06  |
| TcCLB.511725.134 | mitochondrial carrier protein, putative                         | -0,6252 | 6,702E-08  |
| TcCLB.507937.6   | trans-sialidase (pseudogene), putative                          | -0,6254 | 0,2529     |
| TcCLB.510973.50  | hypothetical protein, conserved                                 | -0,6255 | 6,819E-06  |
| TcCLB.508461.430 | proteasome beta 2 subunit, putative                             | -0,6256 | 5,731E-13  |
| TcCLB.503917.28  | hypothetical protein, conserved                                 | -0,6258 | 3,609E-10  |
| TcCLB.506941.280 | heat shock 70 kDa protein, mitochondrial precursor, putative    | -0,6258 | 0,001409   |
| TcCLB.506195.170 | hypothetical protein, conserved                                 | -0,6263 | 7,277E-10  |
| TcCLB.509649.59  | hypothetical protein, conserved                                 | -0,6263 | 3,46E-07   |
| TcCLB.508885.30  | hypothetical protein                                            | -0,6263 | 0,2998     |
| TcCLB.511531.40  | chaperonin alpha subunit, putative                              | -0,6266 | 8,148E-19  |
| TcCLB.507765.50  | hypothetical protein, conserved                                 | -0,6267 | 2,513E-06  |
| TcCLB.398345.10  | hypothetical protein, conserved                                 | -0,6268 | 3,591E-07  |
| TcCLB.506955.270 | trans-sialidase, Group V, putative                              | -0,627  | 0,01398    |
| TcCLB.510285.130 | hypothetical protein, conserved                                 | -0,6273 | 0,00001429 |
| TcCLB.507709.120 | hypothetical protein, conserved                                 | -0,6274 | 5,091E-18  |
| TcCLB.506183.109 | dispersed gene family protein 1 (DGF-1, pseudogene), putative   | -0,6274 | 0,3904     |
| TcCLB.511523.10  | GTPase activating protein of Rab-like GTPase, putative          | -0,6275 | 0,00001244 |

|                  |                                                            |         |            |
|------------------|------------------------------------------------------------|---------|------------|
| TcCLB.510975.40  | hypothetical protein, conserved                            | -0,6276 | 4,311E-13  |
| TcCLB.508177.20  | carbohydrate kinase, thermoresistant glucokinase, putative | -0,6279 | 0,02187    |
| TcCLB.509643.130 | heat shock protein 85, putative                            | -0,6282 | 1,172E-09  |
| TcCLB.510693.130 | mucin-associated surface protein (MASP), putative          | -0,6282 | 0,1531     |
| TcCLB.509895.70  | hypothetical protein, conserved                            | -0,6283 | 0,0309     |
| TcCLB.505977.13  | protein kinase, putative (fragment)                        | -0,6286 | 3,847E-09  |
| TcCLB.507517.30  | hypothetical protein, conserved                            | -0,6286 | 0,0001053  |
| TcCLB.504013.70  | metallo-peptidase, Clan MC, Family M14                     | -0,6289 | 1,972E-09  |
| TcCLB.508681.31  | hypothetical protein                                       | -0,6289 | 0,08279    |
| TcCLB.506459.190 | hypothetical protein                                       | -0,6291 | 0,04392    |
| TcCLB.504021.50  | hypothetical protein                                       | -0,6296 | 4,063E-09  |
| TcCLB.507943.80  | hypothetical protein, conserved (pseudogene)               | -0,6296 | 6,245E-06  |
| TcCLB.506503.56  | hypothetical protein, conserved                            | -0,6298 | 6,142E-07  |
| TcCLB.506491.20  | myosin heavy chain, putative                               | -0,6299 | 7,839E-16  |
| TcCLB.511159.7   | neurobeachin/beige protein, putative                       | -0,6299 | 7,117E-09  |
| TcCLB.508675.60  | hypothetical protein, conserved                            | -0,63   | 8,846E-09  |
| TcCLB.503911.20  | pre-mRNA splicing factor ATP-dependent RNA helicase, pu    | -0,6302 | 3,59E-08   |
| TcCLB.509971.80  | hypothetical protein, conserved                            | -0,6304 | 0,3168     |
| TcCLB.418405.30  | trans-sialidase, putative                                  | -0,6304 | 0,427      |
| TcCLB.508857.15  | trans-sialidase, putative (fragment)                       | -0,6306 | 0,00221    |
| TcCLB.503653.9   | hypothetical protein, conserved                            | -0,6307 | 0,005525   |
| TcCLB.507521.10  | hypothetical protein, conserved                            | -0,6308 | 2,098E-07  |
| TcCLB.504159.80  | histone deacetylase, putative                              | -0,6311 | 1,882E-07  |
| TcCLB.506529.600 | metacyclin II, putative                                    | -0,6312 | 0,1535     |
| TcCLB.506139.4   | mucin TcMUCII, putative                                    | -0,6313 | 0,2958     |
| TcCLB.511287.4   | hypothetical protein                                       | -0,6314 | 5,097E-09  |
| TcCLB.504101.10  | hypothetical protein                                       | -0,6315 | 0,001977   |
| TcCLB.508175.110 | hypothetical protein, conserved                            | -0,6318 | 5,949E-09  |
| TcCLB.507683.10  | hypothetical protein, conserved                            | -0,6319 | 0,0006047  |
| TcCLB.508221.320 | mucin-associated surface protein (MASP, pseudogene), pu    | -0,6322 | 0,1647     |
| TcCLB.506355.70  | hypothetical protein, conserved                            | -0,6323 | 2,141E-12  |
| TcCLB.508307.100 | hypothetical protein, conserved                            | -0,6323 | 0,0007838  |
| TcCLB.504069.100 | RNA polymerase II, putative                                | -0,6324 | 1,216E-06  |
| TcCLB.510225.50  | hypothetical protein, conserved                            | -0,6324 | 0,00004109 |
| TcCLB.510371.61  | surface protease GP63 (pseudogene), putative               | -0,6326 | 0,1377     |
| TcCLB.511621.20  | hypothetical protein, conserved                            | -0,6327 | 0,00000384 |
| TcCLB.510699.34  | trans-sialidase (pseudogene), putative                     | -0,6328 | 0,02789    |
| TcCLB.510359.160 | hypothetical protein, conserved                            | -0,6329 | 0,0004212  |
| TcCLB.507911.36  | ATP-dependent DEAD/H RNA helicase (pseudogene), putat      | -0,633  | 0,09981    |
| TcCLB.503795.10  | hypothetical protein, conserved                            | -0,6331 | 0,1368     |
| TcCLB.506925.90  | hypothetical protein, conserved                            | -0,6334 | 6,811E-10  |
| TcCLB.503555.30  | trypanothione reductase, putative                          | -0,6334 | 3,694E-09  |
| TcCLB.509789.40  | hypothetical protein, conserved                            | -0,6334 | 1,961E-06  |
| TcCLB.505931.20  | surface protease GP63, putative                            | -0,6335 | 0,006071   |
| TcCLB.508319.79  | hypothetical protein, conserved                            | -0,6337 | 0,1166     |

|                  |                                                           |         |            |
|------------------|-----------------------------------------------------------|---------|------------|
| TcCLB.504029.40  | COPII coat assembly protein sec16, putative (sec16)       | -0,6338 | 2,485E-08  |
| TcCLB.504069.34  | hypothetical protein, conserved                           | -0,6338 | 0,004447   |
| TcCLB.409101.9   | hypothetical protein, conserved (fragment)                | -0,634  | 0,002747   |
| TcCLB.510765.30  | COP-coated vesicle membrane protein gp25L precursor, pu   | -0,6341 | 2,205E-07  |
| TcCLB.475169.10  | DNA-directed RNA polymerase II subunit 2 (pseudogene), p  | -0,6342 | 0,0008741  |
| TcCLB.504741.20  | GTP-binding protein, putative                             | -0,6344 | 2,433E-10  |
| TcCLB.504017.70  | hypothetical protein                                      | -0,6344 | 2,933E-07  |
| TcCLB.508539.130 | trans-sialidase (pseudogene), putative                    | -0,6345 | 0,00466    |
| TcCLB.508153.870 | hypothetical protein, conserved                           | -0,6346 | 2,001E-09  |
| TcCLB.504105.180 | hypothetical protein, conserved                           | -0,6347 | 1,263E-08  |
| TcCLB.508207.140 | hypothetical protein, conserved                           | -0,6347 | 9,852E-07  |
| TcCLB.503847.99  | hypothetical protein, conserved (pseudogene)              | -0,6347 | 0,0009447  |
| TcCLB.503929.70  | hypothetical protein, conserved                           | -0,6348 | 0,00002672 |
| TcCLB.511173.130 | trans-sialidase, Group V, putative                        | -0,635  | 0,009544   |
| TcCLB.508181.120 | hypothetical protein, conserved                           | -0,6351 | 2,32E-11   |
| TcCLB.511129.54  | hypothetical protein, conserved (pseudogene)              | -0,6351 | 0,001797   |
| TcCLB.511183.381 | syntaxin binding protein 1, (pseudogene), putative        | -0,6351 | 0,05655    |
| TcCLB.511725.200 | hypothetical protein, conserved                           | -0,6354 | 4,334E-09  |
| TcCLB.510431.100 | hypothetical protein, conserved                           | -0,6355 | 2,332E-07  |
| TcCLB.510057.20  | hypothetical protein, conserved                           | -0,6355 | 0,0002456  |
| TcCLB.509773.9   | protein kinase, putative                                  | -0,6356 | 0,00005398 |
| TcCLB.511895.69  | C-5 sterol desaturase, putative                           | -0,6358 | 0,001164   |
| TcCLB.509233.230 | hypothetical protein, conserved                           | -0,6359 | 2,146E-09  |
| TcCLB.510159.19  | hypothetical protein, conserved (fragment)                | -0,636  | 0,0005468  |
| TcCLB.509487.4   | DNA-directed RNA polymerase III, putative                 | -0,6362 | 0,00633    |
| TcCLB.510823.10  | hypothetical protein, conserved                           | -0,6368 | 2,687E-11  |
| TcCLB.503929.20  | ribosomal protein L13, putative                           | -0,6368 | 0,0006599  |
| TcCLB.504057.120 | lipophosphoglycan biosynthetic protein 2, putative        | -0,6371 | 3,105E-06  |
| TcCLB.508625.60  | hypothetical protein, conserved                           | -0,6371 | 0,00002119 |
| TcCLB.511517.140 | hypothetical protein                                      | -0,6373 | 2,693E-06  |
| TcCLB.504827.100 | hypothetical protein, conserved                           | -0,6373 | 4,642E-06  |
| TcCLB.507023.50  | hypothetical protein, conserved                           | -0,6374 | 3,846E-07  |
| TcCLB.507681.20  | succinyl-CoA ligase [GDP-forming] beta-chain, putative    | -0,6377 | 2,023E-19  |
| TcCLB.508645.50  | hypothetical protein, conserved                           | -0,6377 | 7,745E-10  |
| TcCLB.508479.290 | vacuolar sorting protein, putative                        | -0,6378 | 0,00004874 |
| TcCLB.510475.40  | mucin TcMUCII, putative                                   | -0,6381 | 0,2862     |
| TcCLB.506567.34  | hypothetical protein, conserved                           | -0,6385 | 7,493E-09  |
| TcCLB.506513.14  | hypothetical protein, conserved                           | -0,6385 | 0,001943   |
| TcCLB.510483.250 | trans-sialidase (pseudogene), putative                    | -0,6385 | 0,02124    |
| TcCLB.507983.10  | dispersed gene family protein 1 (DGF-1), putative (fragme | -0,6388 | 0,07049    |
| TcCLB.507049.90  | hypothetical protein, conserved                           | -0,6391 | 0,00000107 |
| TcCLB.504411.10  | hypothetical protein, conserved                           | -0,6392 | 2,994E-07  |
| TcCLB.506057.40  | trans-sialidase (pseudogene), putative                    | -0,6392 | 0,00005057 |
| TcCLB.506255.30  | hypothetical protein, conserved                           | -0,6392 | 0,009406   |
| TcCLB.508257.150 | small nuclear ribonucleoprotein SmD3, putative            | -0,6394 | 1,203E-06  |

|                  |                                                                 |         |            |
|------------------|-----------------------------------------------------------------|---------|------------|
| TcCLB.504075.10  | RNA polymerase I, putative                                      | -0,6395 | 1,289E-06  |
| TcCLB.509203.70  | DNA topoisomerase II, putative                                  | -0,6402 | 3,063E-13  |
| TcCLB.510565.179 | hypothetical protein, conserved                                 | -0,6404 | 3,169E-15  |
| TcCLB.510773.9   | hypothetical protein, conserved (fragment)                      | -0,6407 | 0,0002446  |
| TcCLB.509955.50  | hypothetical protein, conserved                                 | -0,6407 | 0,2446     |
| TcCLB.510217.70  | trans-sialidase (pseudogene), putative                          | -0,6408 | 0,1203     |
| TcCLB.507981.10  | trans-sialidase (pseudogene), putative                          | -0,6409 | 0,07721    |
| TcCLB.508163.320 | mucin-associated surface protein (MASP), putative               | -0,6413 | 0,09413    |
| TcCLB.509451.50  | hypothetical protein, conserved                                 | -0,6415 | 2,515E-10  |
| TcCLB.509085.60  | dispersed gene family protein 1 (DGF-1), putative               | -0,6415 | 0,001092   |
| TcCLB.510339.40  | hypothetical protein, conserved                                 | -0,6416 | 1,151E-07  |
| TcCLB.506529.490 | hypothetical protein, conserved                                 | -0,6416 | 1,292E-07  |
| TcCLB.505943.95  | trans-sialidase (pseudogene), putative                          | -0,6416 | 0,00007883 |
| TcCLB.504089.79  | retrotransposon hot spot protein (RHS, pseudogene), putative    | -0,6417 | 0,1241     |
| TcCLB.511383.60  | hypothetical protein, conserved                                 | -0,6418 | 0,0001401  |
| TcCLB.508683.9   | dispersed gene family protein 1 (DGF-1), putative               | -0,642  | 0,09538    |
| TcCLB.504443.30  | DNA-directed RNA polymerase II subunit 2, putative (pseudogene) | -0,6421 | 7,424E-14  |
| TcCLB.511189.20  | hypothetical protein, conserved                                 | -0,6421 | 1,126E-07  |
| TcCLB.510087.110 | hypothetical protein, conserved                                 | -0,6422 | 8,91E-11   |
| TcCLB.415789.9   | dispersed gene family protein 1 (DGF-1), putative (fragment)    | -0,6422 | 0,00002161 |
| TcCLB.422041.9   | pre-mRNA splicing factor ATP-dependent RNA helicase, putative   | -0,6424 | 0,0003544  |
| TcCLB.508365.220 | hypothetical protein, conserved (pseudogene)                    | -0,6424 | 0,09372    |
| TcCLB.504557.60  | hypothetical protein, conserved                                 | -0,6425 | 0,00006737 |
| TcCLB.507529.40  | hypothetical protein, conserved                                 | -0,6426 | 4,253E-08  |
| TcCLB.508153.60  | metallo-peptidase, Clan MA(E) Family M1                         | -0,6427 | 1,418E-13  |
| TcCLB.509233.200 | hypothetical protein, conserved                                 | -0,6431 | 2,452E-12  |
| TcCLB.507639.70  | hypothetical protein, conserved                                 | -0,6431 | 0,00016    |
| TcCLB.511463.4   | actin, putative                                                 | -0,6433 | 0,01309    |
| TcCLB.507049.160 | hypothetical protein, conserved                                 | -0,6434 | 2,052E-06  |
| TcCLB.510019.30  | mucin-associated surface protein (MASP), putative               | -0,6434 | 0,076      |
| TcCLB.506957.130 | hypothetical protein, conserved                                 | -0,644  | 1,385E-08  |
| TcCLB.510519.100 | hypothetical protein, conserved                                 | -0,644  | 0,00005489 |
| TcCLB.506815.20  | mucin-associated surface protein (MASP, pseudogene), putative   | -0,6443 | 0,00005322 |
| TcCLB.510823.90  | hypothetical protein                                            | -0,6447 | 5,843E-10  |
| TcCLB.503783.17  | mucin TcMUCII, putative                                         | -0,6447 | 0,2216     |
| TcCLB.510289.3   | hypothetical protein, conserved                                 | -0,6449 | 0,004237   |
| TcCLB.508405.119 | hypothetical protein, conserved                                 | -0,6449 | 0,03495    |
| TcCLB.511217.50  | hypothetical protein, conserved                                 | -0,645  | 1,947E-15  |
| TcCLB.508357.26  | hypothetical protein, conserved                                 | -0,6452 | 9,487E-06  |
| TcCLB.503999.90  | RNA-binding protein 34, putative (RBP34)                        | -0,6453 | 9,069E-06  |
| TcCLB.503845.20  | dispersed gene family protein 1 (DGF-1, pseudogene), putative   | -0,6456 | 0,009808   |
| TcCLB.510099.90  | tyrosine phosphatase isoform, putative                          | -0,6458 | 2,267E-08  |
| TcCLB.511867.150 | hypothetical protein, conserved                                 | -0,6459 | 5,864E-06  |
| TcCLB.506319.20  | hypothetical protein, conserved                                 | -0,646  | 4,8E-08    |
| TcCLB.510363.70  | mucin-associated surface protein (MASP), putative               | -0,6461 | 0,2546     |

|                  |                                                           |         |            |
|------------------|-----------------------------------------------------------|---------|------------|
| TcCLB.510323.120 | kinesin, putative                                         | -0,6462 | 2,091E-07  |
| TcCLB.509525.210 | hypothetical protein                                      | -0,6462 | 0,06465    |
| TcCLB.440343.9   | dispersed gene family protein 1 (DGF-1), putative (fragme | -0,6463 | 0,2118     |
| TcCLB.506559.540 | hypothetical protein, conserved                           | -0,6464 | 2,913E-07  |
| TcCLB.504147.250 | hypothetical protein, conserved                           | -0,6465 | 2,874E-15  |
| TcCLB.508541.10  | elongation factor 1-gamma (EF-1-gamma, pseudogene), p     | -0,6468 | 0,05098    |
| TcCLB.508209.50  | hypothetical protein, conserved                           | -0,6472 | 0,001322   |
| TcCLB.508213.40  | hypothetical protein, conserved                           | -0,6473 | 0,0002141  |
| TcCLB.503781.10  | hypothetical protein, conserved                           | -0,6474 | 3,073E-16  |
| TcCLB.506855.320 | hypothetical protein, conserved                           | -0,6474 | 0,00002331 |
| TcCLB.511627.90  | hypothetical protein, conserved                           | -0,6474 | 0,0003604  |
| TcCLB.509419.140 | mucin-associated surface protein (MASP), putative         | -0,6475 | 0,02809    |
| TcCLB.506409.110 | hypothetical protein                                      | -0,6476 | 0,01833    |
| TcCLB.508211.19  | hypothetical protein, conserved                           | -0,648  | 0,0002577  |
| TcCLB.508761.60  | hypothetical protein (pseudogene)                         | -0,648  | 0,09827    |
| TcCLB.508775.60  | hypothetical protein, conserved (pseudogene)              | -0,6482 | 0,02446    |
| TcCLB.506335.15  | hypothetical protein                                      | -0,6485 | 0,03938    |
| TcCLB.503973.50  | mucin-associated surface protein (MASP), putative         | -0,6488 | 0,08081    |
| TcCLB.507601.20  | hypothetical protein, conserved                           | -0,649  | 0,00319    |
| TcCLB.510239.10  | dispersed gene family protein 1 (DGF-1), putative         | -0,649  | 0,1004     |
| TcCLB.509641.20  | hypothetical protein, conserved                           | -0,6491 | 0,00003475 |
| TcCLB.504031.50  | trans-sialidase, Group V, putative                        | -0,6492 | 0,03358    |
| TcCLB.510747.18  | hypothetical protein, conserved                           | -0,6495 | 0,00001692 |
| TcCLB.507357.50  | hypothetical protein                                      | -0,6496 | 0,08158    |
| TcCLB.507681.220 | pre-mRNA splicing factor ATP-dependent RNA helicase, pu   | -0,6497 | 7,847E-13  |
| TcCLB.506453.10  | trans-sialidase, putative                                 | -0,6497 | 0,05147    |
| TcCLB.511741.30  | replication factor C, subunit 2, putative                 | -0,6498 | 5,386E-09  |
| TcCLB.510901.30  | hypothetical protein, conserved                           | -0,6498 | 5,634E-07  |
| TcCLB.506319.30  | hypothetical protein, conserved                           | -0,6498 | 1,248E-06  |
| TcCLB.505075.10  | hypothetical protein, conserved                           | -0,6501 | 0,00001295 |
| TcCLB.507017.130 | hypothetical protein                                      | -0,6501 | 0,001664   |
| TcCLB.503833.50  | hypothetical protein, conserved                           | -0,6503 | 7,965E-16  |
| TcCLB.511479.10  | trans-sialidase (pseudogene), putative                    | -0,6508 | 0,3611     |
| TcCLB.511401.80  | hypothetical protein, conserved (pseudogene)              | -0,6509 | 0,00007233 |
| TcCLB.509803.40  | 5-oxoprolinase, putative                                  | -0,6511 | 2,698E-08  |
| TcCLB.506667.10  | mucin-associated surface protein (MASP), putative         | -0,6511 | 0,1906     |
| TcCLB.504117.9   | hypothetical protein, conserved                           | -0,6512 | 1,208E-09  |
| TcCLB.507093.50  | hypothetical protein, conserved                           | -0,6513 | 3,238E-14  |
| TcCLB.509457.10  | hypothetical protein                                      | -0,6514 | 1,693E-12  |
| TcCLB.508987.39  | hypothetical protein, conserved                           | -0,6514 | 3,033E-08  |
| TcCLB.505807.270 | ubiquitin hydrolase, putative                             | -0,6515 | 0,00001368 |
| TcCLB.506591.10  | hypothetical protein, conserved                           | -0,6519 | 0,005152   |
| TcCLB.416511.9   | mismatch repair protein MSH3, putative                    | -0,652  | 4,821E-06  |
| TcCLB.504155.140 | mucin TcMUCII, putative                                   | -0,652  | 0,6097     |
| TcCLB.505999.24  | hypothetical protein, conserved                           | -0,6523 | 0,0001148  |

|                  |                                                               |         |            |
|------------------|---------------------------------------------------------------|---------|------------|
| TcCLB.507237.24  | mucin TcMUCII (pseudogene), putative                          | -0,6523 | 0,4504     |
| TcCLB.509845.9   | dispersed gene family protein 1 (DGF-1), putative             | -0,6524 | 0,01472    |
| TcCLB.510279.290 | dispersed gene family protein 1 (DGF-1, pseudogene), putative | -0,6526 | 0,01009    |
| TcCLB.511303.90  | hypothetical protein, conserved                               | -0,6529 | 1,353E-09  |
| TcCLB.509525.70  | hypothetical protein                                          | -0,653  | 0,0744     |
| TcCLB.510305.9   | Present in the outer mitochondrial membrane proteome 3i       | -0,6531 | 0,00002086 |
| TcCLB.503671.30  | Protein tilB homolog, putative (LRTP)                         | -0,6533 | 0,00001078 |
| TcCLB.508145.40  | hypothetical protein, conserved                               | -0,6533 | 0,00009001 |
| TcCLB.510713.120 | surface protease GP63, putative                               | -0,6533 | 0,2172     |
| TcCLB.506317.20  | hypothetical protein, conserved                               | -0,6536 | 1,358E-13  |
| TcCLB.510149.90  | Golgi vesicular membrane trafficking protein, putative        | -0,6536 | 0,0009017  |
| TcCLB.510091.100 | hypothetical protein, conserved                               | -0,6541 | 0,00001557 |
| TcCLB.509499.4   | hypothetical protein, conserved                               | -0,6541 | 0,00007307 |
| TcCLB.510513.50  | hypothetical protein, conserved                               | -0,6544 | 8,766E-06  |
| TcCLB.505023.40  | mucin-associated surface protein (MASP), putative             | -0,6544 | 0,01417    |
| TcCLB.508259.20  | dispersed gene family protein 1 (DGF-1, pseudogene), putative | -0,6546 | 0,02223    |
| TcCLB.509911.120 | hypothetical protein                                          | -0,6547 | 2,193E-15  |
| TcCLB.504643.40  | U6 snRNA-associated Sm-like protein LSm4, putative            | -0,6552 | 0,00006793 |
| TcCLB.507575.10  | dispersed gene family protein 1 (DGF-1), putative             | -0,6552 | 0,02978    |
| TcCLB.510897.99  | hypothetical protein, conserved (fragment)                    | -0,6556 | 0,002277   |
| TcCLB.504057.30  | hypothetical protein, conserved                               | -0,6558 | 9,602E-17  |
| TcCLB.506519.70  | hypothetical protein                                          | -0,6559 | 0,00002739 |
| TcCLB.509231.50  | hypothetical protein, conserved                               | -0,6565 | 0,00002388 |
| TcCLB.511593.40  | trans-sialidase (pseudogene), putative                        | -0,657  | 1,234E-07  |
| TcCLB.510085.4   | mucin TcMUCII (pseudogene), putative                          | -0,6572 | 0,2135     |
| TcCLB.509105.130 | ATP-binding cassette sub-family F member 1, putative (AB      | -0,6573 | 3,526E-16  |
| TcCLB.507019.110 | hypothetical protein                                          | -0,6575 | 0,00005654 |
| TcCLB.506357.60  | hypothetical protein, conserved                               | -0,6577 | 8,724E-16  |
| TcCLB.511211.210 | hypothetical protein, conserved                               | -0,6581 | 0,004199   |
| TcCLB.503543.10  | presenilin-like aspartic peptidase, putative                  | -0,6582 | 9,048E-09  |
| TcCLB.509353.50  | hypothetical protein, conserved                               | -0,6583 | 3,805E-09  |
| TcCLB.509319.60  | endo/exonuclease Mre11, putative                              | -0,6589 | 2,367E-13  |
| TcCLB.509791.70  | hypothetical protein, conserved                               | -0,6589 | 0,0000735  |
| TcCLB.510285.120 | hypothetical protein, conserved                               | -0,659  | 3,412E-11  |
| TcCLB.507711.235 | deoxyribodipyrimidine photo-lyase, putative                   | -0,659  | 4,366E-06  |
| TcCLB.509941.110 | condensin subunit 1, putative                                 | -0,6591 | 1,951E-15  |
| TcCLB.509213.30  | hypothetical protein, conserved                               | -0,6591 | 0,00001286 |
| TcCLB.510719.250 | RNA polymerase-associated protein CDC73, putative             | -0,6592 | 1,398E-08  |
| TcCLB.507611.131 | protein kinase (pseudogene), putative                         | -0,6592 | 0,0001929  |
| TcCLB.510321.10  | RNA polymerase-associated protein CTR9, putative              | -0,6594 | 0,00002547 |
| TcCLB.403789.9   | DNA-directed rna polymerase I largest subunit, putative       | -0,6595 | 0,0008006  |
| TcCLB.510763.109 | rRNA processing protein, putative                             | -0,6597 | 6,794E-06  |
| TcCLB.503791.40  | dihydrouridine synthase, putative                             | -0,6598 | 0,0006752  |
| TcCLB.506695.10  | actin-like protein, putative                                  | -0,6599 | 0,00004709 |
| TcCLB.507685.10  | hypothetical protein, conserved                               | -0,6601 | 1,874E-06  |



|                  |                                                               |         |            |
|------------------|---------------------------------------------------------------|---------|------------|
| TcCLB.503749.30  | hypothetical protein, conserved                               | -0,6603 | 4,247E-09  |
| TcCLB.508461.40  | hypothetical protein, conserved                               | -0,6603 | 0,00001072 |
| TcCLB.508741.320 | casein kinase II, alpha chain, putative                       | -0,6605 | 5,617E-10  |
| TcCLB.506511.50  | hypothetical protein, conserved                               | -0,6607 | 1,509E-17  |
| TcCLB.506435.300 | ubiquitin-protein ligase, putative                            | -0,6607 | 0,00001658 |
| TcCLB.484311.10  | calpain-like cysteine peptidase, putative (fragment)          | -0,6609 | 0,0392     |
| TcCLB.511113.9   | hypothetical protein, conserved (fragment)                    | -0,661  | 4,56E-11   |
| TcCLB.509167.200 | hypothetical protein, conserved                               | -0,6613 | 1,663E-09  |
| TcCLB.506835.80  | CAS/CSE/importin domain protein, putative                     | -0,6618 | 3,136E-13  |
| TcCLB.508325.290 | trans-sialidase (pseudogene), putative                        | -0,6618 | 3,471E-11  |
| TcCLB.510879.70  | selenocysteine-tRNA-specific elongation factor, putative      | -0,6621 | 4,314E-09  |
| TcCLB.511725.210 | hypothetical protein, conserved                               | -0,6621 | 4,568E-07  |
| TcCLB.506213.30  | hypothetical protein, conserved                               | -0,6621 | 0,0001721  |
| TcCLB.504625.20  | hypothetical protein, conserved                               | -0,6624 | 6,228E-06  |
| TcCLB.509665.30  | trans-sialidase, Group V, putative                            | -0,6624 | 0,06641    |
| TcCLB.510257.90  | autophagocytosis associated protein, putative                 | -0,6628 | 0,00005302 |
| TcCLB.504431.64  | high mobility group protein, putative                         | -0,6629 | 1,732E-10  |
| TcCLB.506315.60  | hypothetical protein, conserved                               | -0,6632 | 0,0000013  |
| TcCLB.508207.5   | retrotransposon hot spot protein (RHS, pseudogene), putative  | -0,6633 | 6,952E-10  |
| TcCLB.504103.3   | hypothetical protein, conserved (fragment)                    | -0,6634 | 0,00000764 |
| TcCLB.508837.180 | DNA polymerase I alpha catalytic subunit, putative            | -0,6635 | 1,975E-17  |
| TcCLB.508355.70  | diacylglycerol acyltransferase, putative                      | -0,6635 | 1,51E-11   |
| TcCLB.508707.160 | hypothetical protein, conserved                               | -0,6636 | 1,161E-06  |
| TcCLB.510173.20  | hypothetical protein, conserved                               | -0,6636 | 0,00001164 |
| TcCLB.509967.3   | hypothetical protein, conserved (pseudogene)                  | -0,6636 | 0,004924   |
| TcCLB.509499.38  | hypothetical protein, conserved                               | -0,6637 | 7,175E-11  |
| TcCLB.507687.60  | trans-sialidase (pseudogene), putative                        | -0,6638 | 0,03481    |
| TcCLB.506667.160 | trans-sialidase, Group V, putative                            | -0,6643 | 0,0544     |
| TcCLB.510755.98  | kinetoplastid membrane protein KMP-11, putative               | -0,6645 | 0,0009323  |
| TcCLB.510315.20  | mitochondrial carrier protein, putative                       | -0,6646 | 4,991E-07  |
| TcCLB.503879.20  | hypothetical protein, conserved                               | -0,6648 | 3,841E-08  |
| TcCLB.510643.180 | trans-sialidase (pseudogene), putative                        | -0,6652 | 0,00001435 |
| TcCLB.506155.80  | hypothetical protein, conserved                               | -0,6654 | 9,238E-11  |
| TcCLB.504103.10  | hypothetical protein, conserved                               | -0,6654 | 0,0001496  |
| TcCLB.511599.40  | dispersed gene family protein 1 (DGF-1), putative             | -0,6654 | 0,0002053  |
| TcCLB.506709.20  | hypothetical protein, conserved                               | -0,6657 | 3,729E-12  |
| TcCLB.509165.10  | trans-sialidase (pseudogene), putative                        | -0,6661 | 0,00001559 |
| TcCLB.510475.70  | mucin TcMUCII, putative                                       | -0,6661 | 0,1156     |
| TcCLB.506671.90  | mucin-associated surface protein (MASP), putative             | -0,6663 | 0,1693     |
| TcCLB.506989.40  | Golgi vesicular membrane trafficking protein, putative        | -0,6665 | 0,001044   |
| TcCLB.511003.130 | hypothetical protein, conserved                               | -0,6666 | 0,0000277  |
| TcCLB.506767.183 | mucin-associated surface protein (MASP, pseudogene), putative | -0,6667 | 0,005      |
| TcCLB.511301.100 | hypothetical protein, conserved                               | -0,6668 | 2,069E-08  |
| TcCLB.510357.110 | hypothetical protein, conserved                               | -0,6668 | 0,00001957 |
| TcCLB.504109.100 | hypothetical protein, conserved                               | -0,6672 | 8,516E-14  |

|                  |                                                            |         |            |
|------------------|------------------------------------------------------------|---------|------------|
| TcCLB.508221.539 | hypothetical protein, conserved                            | -0,6673 | 0,22       |
| TcCLB.508479.320 | hypothetical protein, conserved                            | -0,6675 | 0,0009237  |
| TcCLB.510359.320 | DNA-directed RNA polymerase III subunit, putative          | -0,6675 | 0,004164   |
| TcCLB.511139.10  | hypothetical protein, conserved (pseudogene)               | -0,6678 | 5,395E-06  |
| TcCLB.506489.10  | hypothetical protein, conserved                            | -0,6682 | 1,502E-17  |
| TcCLB.511585.180 | hypothetical protein, conserved                            | -0,6682 | 0,0006014  |
| TcCLB.506253.11  | hypothetical protein, conserved (pseudogene)               | -0,6682 | 0,009264   |
| TcCLB.506567.110 | hypothetical protein, conserved                            | -0,6686 | 1,861E-08  |
| TcCLB.434931.20  | hypothetical protein, conserved                            | -0,6686 | 9,865E-07  |
| TcCLB.507625.160 | hypothetical protein, conserved                            | -0,6686 | 0,0004344  |
| TcCLB.510943.198 | hypothetical protein, conserved                            | -0,6687 | 0,00002825 |
| TcCLB.510999.10  | hypothetical protein, conserved                            | -0,6688 | 3,012E-09  |
| TcCLB.504827.50  | apurinic/aprimidinic endonuclease, putative                | -0,6688 | 0,00001329 |
| TcCLB.506807.39  | hypothetical protein, conserved (fragment)                 | -0,6691 | 0,00001523 |
| TcCLB.510609.120 | hypothetical protein, conserved                            | -0,6692 | 1,275E-10  |
| TcCLB.506239.10  | hypothetical protein, conserved                            | -0,6695 | 7,788E-06  |
| TcCLB.458759.20  | hypothetical protein, conserved                            | -0,6695 | 0,0001151  |
| TcCLB.508699.40  | eukaryotic translation initiation factor, putative         | -0,6696 | 5,479E-10  |
| TcCLB.507767.10  | succinyl-CoA ligase [GDP-forming] beta-chain, putative     | -0,6697 | 1,77E-19   |
| TcCLB.506941.30  | hypothetical protein, conserved                            | -0,6699 | 7,667E-14  |
| TcCLB.509157.50  | hypothetical protein                                       | -0,6699 | 1,463E-11  |
| TcCLB.509741.20  | hypothetical protein, conserved                            | -0,6699 | 2,509E-06  |
| TcCLB.504779.10  | UDP-Gal or UDP-GlcNAc-dependent glycosyltransferase, p     | -0,6699 | 0,05122    |
| TcCLB.503811.20  | U3 small nucleolar ribonucleoprotein protein MPP10, putat  | -0,6703 | 3,463E-12  |
| TcCLB.510327.5   | surface protease GP63 (pseudogene), putative               | -0,6703 | 0,07528    |
| TcCLB.510689.10  | coatomer alpha subunit (pseudogene), putative              | -0,6707 | 1,929E-16  |
| TcCLB.506435.20  | hypothetical protein, conserved                            | -0,6713 | 6,337E-16  |
| TcCLB.510713.101 | surface protease GP63 (pseudogene), putative               | -0,6714 | 0,2295     |
| TcCLB.506727.90  | enoyl-CoA hydratase/isomerase family protein, putative     | -0,6718 | 4,786E-08  |
| TcCLB.508625.20  | hypothetical protein, conserved                            | -0,6719 | 0,0003407  |
| TcCLB.510821.10  | hypothetical protein, conserved                            | -0,6722 | 7,581E-09  |
| TcCLB.418069.10  | heat shock protein 70 (hsp70), putative (fragment)         | -0,6723 | 2,734E-10  |
| TcCLB.511871.30  | hypothetical protein, conserved                            | -0,6728 | 6,289E-11  |
| TcCLB.511003.40  | hypothetical protein, conserved                            | -0,6729 | 1,27E-11   |
| TcCLB.507713.30  | heat shock protein 85, putative                            | -0,6729 | 0,05948    |
| TcCLB.463955.10  | mucin TcMUCII, putative                                    | -0,6731 | 0,1116     |
| TcCLB.506579.20  | hypothetical protein, conserved                            | -0,6732 | 1,743E-09  |
| TcCLB.511367.80  | hypothetical protein, conserved                            | -0,6732 | 1,838E-06  |
| TcCLB.505555.20  | hypothetical protein, conserved                            | -0,6733 | 0,00003675 |
| TcCLB.506703.90  | trans-sialidase, Group VI, putative                        | -0,6733 | 0,06996    |
| TcCLB.506659.30  | glutathione synthetase, putative                           | -0,6735 | 1,899E-07  |
| TcCLB.509443.10  | hypothetical protein                                       | -0,6739 | 0,0007643  |
| TcCLB.506247.10  | bloodstream- specific protein 2 precursor (fragment) (PDI2 | -0,674  | 1,278E-12  |
| TcCLB.506211.259 | hypothetical protein, conserved                            | -0,674  | 0,0000959  |
| TcCLB.453445.10  | hypothetical protein, conserved                            | -0,6744 | 1,997E-13  |

|                  |                                                               |         |            |
|------------------|---------------------------------------------------------------|---------|------------|
| TcCLB.506247.74  | hypothetical protein, conserved                               | -0,6744 | 0,002491   |
| TcCLB.504001.20  | hypothetical protein, conserved                               | -0,6748 | 9,749E-09  |
| TcCLB.511625.140 | mucin-associated surface protein (MASP, pseudogene), pu       | -0,675  | 0,0001668  |
| TcCLB.506435.390 | metallo-peptidase, Clan MA(E) Family M41                      | -0,6755 | 1,625E-10  |
| TcCLB.511663.50  | dispersed gene family protein 1 (DGF-1), putative             | -0,6756 | 0,1205     |
| TcCLB.508599.10  | hypothetical protein, conserved (pseudogene)                  | -0,6758 | 0,1496     |
| TcCLB.508909.170 | hypothetical protein, conserved                               | -0,676  | 2,254E-11  |
| TcCLB.511351.20  | hypothetical protein, conserved                               | -0,6762 | 2,151E-07  |
| TcCLB.509935.10  | hypothetical protein                                          | -0,6763 | 0,01148    |
| TcCLB.511469.30  | coatomer subunit zeta, putative                               | -0,6769 | 0,00001934 |
| TcCLB.510327.20  | surface protease GP63 (pseudogene), putative                  | -0,6778 | 0,01352    |
| TcCLB.505989.82  | ruvB-like DNA helicase, putative                              | -0,6781 | 3,543E-11  |
| TcCLB.509429.300 | hypothetical protein, conserved                               | -0,6782 | 1,118E-07  |
| TcCLB.509643.80  | DNA mismatch repair protein MSH2, putative (MSH2)             | -0,6785 | 6,905E-15  |
| TcCLB.511731.89  | hypothetical protein, conserved                               | -0,6786 | 0,00001701 |
| TcCLB.508479.10  | protein kinase, putative                                      | -0,6788 | 0,0333     |
| TcCLB.511545.30  | hypothetical protein, conserved                               | -0,6789 | 6,795E-09  |
| TcCLB.507521.20  | kinesin, putative                                             | -0,6789 | 0,00001393 |
| TcCLB.507583.40  | hypothetical protein, conserved                               | -0,6792 | 6,349E-12  |
| TcCLB.511245.200 | hypothetical protein, conserved                               | -0,6793 | 3,888E-17  |
| TcCLB.507163.80  | hypothetical protein, conserved                               | -0,6796 | 8,403E-06  |
| TcCLB.509071.10  | hypothetical protein, conserved (pseudogene)                  | -0,6797 | 0,003524   |
| TcCLB.506457.40  | hypoxanthine-guanine phosphoribosyltransferase, putative      | -0,6798 | 9,355E-09  |
| TcCLB.511127.210 | hypothetical protein, conserved                               | -0,6798 | 0,0004553  |
| TcCLB.510665.30  | hypothetical protein, conserved                               | -0,6799 | 3,133E-06  |
| TcCLB.508461.320 | PRP8 protein homologue, putative                              | -0,6803 | 7,8E-27    |
| TcCLB.510629.10  | mucin-associated surface protein (MASP), putative             | -0,6805 | 0,268      |
| TcCLB.503939.80  | prolyl-tRNA synthetase, putative                              | -0,6806 | 1,518E-19  |
| TcCLB.508283.25  | hypothetical protein, conserved (pseudogene)                  | -0,6809 | 0,01694    |
| TcCLB.510057.10  | hypothetical protein, conserved                               | -0,681  | 0,009693   |
| TcCLB.507747.210 | hypothetical protein, conserved                               | -0,6811 | 3,949E-07  |
| TcCLB.510463.211 | trans-sialidase (pseudogene), putative                        | -0,6811 | 0,0795     |
| TcCLB.510659.257 | phospholipase A2-like protein, putative                       | -0,6812 | 5,038E-08  |
| TcCLB.506599.130 | mucin TcMUCII (pseudogene), putative                          | -0,6812 | 0,01072    |
| TcCLB.505843.40  | E1-like ubiquitin-activating enzyme, putative (UBA5)          | -0,6813 | 4,989E-13  |
| TcCLB.511481.60  | RNA helicase, putative                                        | -0,6818 | 6,853E-19  |
| TcCLB.510899.30  | hypothetical protein, conserved                               | -0,6819 | 1,875E-06  |
| TcCLB.511789.10  | dispersed gene family protein 1 (DGF-1, pseudogene), putative | -0,6819 | 0,08482    |
| TcCLB.509437.40  | heat shock protein DNAJ, putative                             | -0,682  | 1,92E-15   |
| TcCLB.510025.126 | syntaxin binding protein (pseudogene), putative               | -0,6827 | 0,0689     |
| TcCLB.503781.40  | hypothetical protein, conserved                               | -0,6828 | 0,0000844  |
| TcCLB.509829.20  | isovaleryl-coA dehydrogenase, putative                        | -0,6829 | 0,00001929 |
| TcCLB.510421.100 | hypothetical protein, conserved                               | -0,6831 | 8,549E-09  |
| TcCLB.506989.30  | ABC transporter, putative                                     | -0,6833 | 2,568E-21  |
| TcCLB.510933.180 | syntaxin binding protein (pseudogene), putative               | -0,6835 | 0,1106     |

|                   |                                                        |         |            |
|-------------------|--------------------------------------------------------|---------|------------|
| TcCLB.508939.50   | hypothetical protein, conserved                        | -0,6836 | 0,0008538  |
| TcCLB.508921.40   | hypothetical protein, conserved                        | -0,6836 | 0,001765   |
| TcCLB.510643.121  | trans-sialidase (pseudogene), putative                 | -0,6838 | 0,0008421  |
| TcCLB.509429.130  | hypothetical protein, conserved                        | -0,684  | 9,161E-07  |
| TcCLB.511255.516  | syntaxin binding protein (pseudogene), putative        | -0,6841 | 0,09915    |
| TcCLB.507753.3    | hypothetical protein, conserved (pseudogene)           | -0,6843 | 0,01221    |
| TcCLB.508365.50   | mucin TcMUCII, putative                                | -0,6846 | 0,2968     |
| TcCLB.503779.50   | hypothetical protein, conserved                        | -0,685  | 0,001069   |
| TcCLB.506295.40   | hypothetical protein, conserved                        | -0,6851 | 1,627E-06  |
| TcCLB.510889.280  | metacyclin II, putative                                | -0,6852 | 0,163      |
| TcCLB.506517.30   | hypothetical protein                                   | -0,6854 | 1,173E-11  |
| TcCLB.508153.1110 | arginine N-methyltransferase, putative                 | -0,6856 | 5,042E-09  |
| TcCLB.506883.40   | Lsm12 protein, putative                                | -0,6858 | 8,602E-09  |
| TcCLB.504239.220  | mucin-associated surface protein (MASP52)              | -0,6858 | 0,09228    |
| TcCLB.511801.70   | hypothetical protein, conserved                        | -0,6863 | 1,3E-08    |
| TcCLB.509669.170  | hypothetical protein, conserved                        | -0,6864 | 5,427E-12  |
| TcCLB.510685.10   | calreticulin, putative                                 | -0,6867 | 7,869E-21  |
| TcCLB.507945.10   | ATP-dependent RNA helicase, putative                   | -0,6867 | 1,644E-12  |
| TcCLB.509063.4    | hypothetical protein, conserved                        | -0,6867 | 0,0005209  |
| TcCLB.506693.4    | elongation initiation factor 2 alpha subunit, putative | -0,687  | 4,133E-08  |
| TcCLB.510769.202  | trans-sialidase (pseudogene), putative                 | -0,6872 | 0,06882    |
| TcCLB.506631.40   | hypothetical protein, conserved                        | -0,6875 | 2,911E-11  |
| TcCLB.511495.30   | hypothetical protein, conserved                        | -0,6877 | 0,00004644 |
| TcCLB.507069.150  | mucin-associated surface protein (MASP), putative      | -0,6877 | 0,03706    |
| TcCLB.511409.30   | hypothetical protein, conserved                        | -0,6878 | 1,203E-11  |
| TcCLB.509287.80   | trans-sialidase, Group VII, putative                   | -0,6882 | 1,592E-08  |
| TcCLB.511605.30   | mucin TcMUCII, putative                                | -0,6882 | 0,3348     |
| TcCLB.506447.19   | hypothetical protein, conserved                        | -0,6886 | 1,818E-08  |
| TcCLB.511215.110  | hypothetical protein, conserved                        | -0,689  | 4,792E-12  |
| TcCLB.510965.10   | hypothetical protein, conserved                        | -0,6892 | 2,037E-07  |
| TcCLB.506811.200  | hypothetical protein, conserved                        | -0,6893 | 8,566E-06  |
| TcCLB.511563.9    | dispersed gene family protein 1 (DGF-1), putative      | -0,6893 | 0,0545     |
| TcCLB.509945.20   | hypothetical protein, conserved                        | -0,6894 | 2,584E-06  |
| TcCLB.504103.30   | myosin heavy chain, putative                           | -0,6902 | 6,184E-09  |
| TcCLB.508375.70   | hypothetical protein, conserved                        | -0,6902 | 8,37E-07   |
| TcCLB.510315.10   | IAG-nucleoside hydrolase, putative (IAGNH)             | -0,6903 | 3,389E-12  |
| TcCLB.481435.9    | clathrin heavy chain, putative                         | -0,6904 | 5,441E-11  |
| TcCLB.507611.370  | protein disulfide isomerase 2 (PDI2)                   | -0,6907 | 1,852E-28  |
| TcCLB.510713.160  | trans-sialidase, Group V, putative                     | -0,6907 | 0,04013    |
| TcCLB.503805.6    | hypothetical protein, conserved                        | -0,6908 | 8,327E-06  |
| TcCLB.507785.10   | clathrin heavy chain, putative                         | -0,6914 | 5,831E-16  |
| TcCLB.506941.20   | tRNA modification enzyme, putative                     | -0,6915 | 0,00000306 |
| TcCLB.506581.14   | peptidyl-prolyl cis-trans isomerase, putative          | -0,6916 | 2,894E-06  |
| TcCLB.506977.40   | hypothetical protein, conserved                        | -0,6918 | 4,456E-07  |
| TcCLB.509029.160  | hypothetical protein, conserved                        | -0,692  | 4,337E-10  |

|                  |                                                         |         |            |
|------------------|---------------------------------------------------------|---------|------------|
| TcCLB.503859.10  | syntaxin binding protein (pseudogene), putative         | -0,6923 | 0,1882     |
| TcCLB.510491.40  | hypothetical protein, conserved                         | -0,6925 | 6,409E-06  |
| TcCLB.511099.180 | trans-sialidase (pseudogene), putative                  | -0,693  | 0,09446    |
| TcCLB.509805.10  | protein kinase A catalytic subunit, putative            | -0,6932 | 0,01055    |
| TcCLB.503583.50  | hypothetical protein, conserved                         | -0,6936 | 1,042E-06  |
| TcCLB.510305.50  | hypothetical protein, conserved                         | -0,6941 | 1,001E-14  |
| TcCLB.430603.20  | mucin TcMUCII, putative                                 | -0,6942 | 0,078      |
| TcCLB.508143.30  | hypothetical protein, conserved (pseudogene)            | -0,6945 | 2,422E-06  |
| TcCLB.511255.270 | trans-sialidase (pseudogene), putative                  | -0,6945 | 0,05789    |
| TcCLB.507941.120 | hypothetical protein, conserved                         | -0,6949 | 0,00001542 |
| TcCLB.506975.97  | hypothetical protein, conserved (fragment)              | -0,6949 | 0,0372     |
| TcCLB.510885.80  | hypothetical protein, conserved                         | -0,695  | 8,571E-07  |
| TcCLB.504133.15  | hypothetical protein, conserved (fragment)              | -0,695  | 0,001584   |
| TcCLB.509841.20  | hypothetical protein                                    | -0,6952 | 0,01202    |
| TcCLB.510475.60  | hypothetical protein                                    | -0,696  | 0,4182     |
| TcCLB.507943.30  | histone H4, putative                                    | -0,6961 | 2,092E-10  |
| TcCLB.511407.10  | nuclear transport factor 2, putative                    | -0,6963 | 3,765E-10  |
| TcCLB.506507.40  | trans-sialidase (pseudogene), putative                  | -0,6965 | 7,388E-08  |
| TcCLB.509733.110 | hypothetical protein, conserved                         | -0,6967 | 8,111E-16  |
| TcCLB.506977.139 | hypothetical protein, conserved                         | -0,6968 | 6,507E-09  |
| TcCLB.508293.27  | mucin-associated surface protein (MASP, pseudogene), pu | -0,697  | 0,1484     |
| TcCLB.510681.41  | surface protease GP63, putative                         | -0,6971 | 0,06888    |
| TcCLB.508175.160 | deoxyuridine triphosphatase, putative                   | -0,698  | 1,025E-08  |
| TcCLB.510047.60  | mucin-associated surface protein (MASP, pseudogene), pu | -0,698  | 0,002173   |
| TcCLB.506965.110 | hypothetical protein                                    | -0,6981 | 0,1629     |
| TcCLB.506201.100 | hypothetical protein, conserved                         | -0,6992 | 4,559E-09  |
| TcCLB.511203.10  | surface protease GP63, putative                         | -0,7    | 0,008643   |
| TcCLB.510963.39  | hypothetical protein, conserved                         | -0,7002 | 0,00001332 |
| TcCLB.511893.30  | hypothetical protein, conserved (pseudogene)            | -0,7004 | 0,00005287 |
| TcCLB.507485.50  | hypothetical protein, conserved                         | -0,7005 | 5,739E-11  |
| TcCLB.507771.9   | kinesin, putative (fragment)                            | -0,7008 | 0,004297   |
| TcCLB.509127.50  | mitochondrial carrier protein, putative                 | -0,701  | 5,486E-11  |
| TcCLB.503891.60  | hypothetical protein, conserved                         | -0,701  | 1,422E-07  |
| TcCLB.508641.10  | dispersed gene family protein 1 (DGF-1), putative       | -0,701  | 0,04172    |
| TcCLB.511871.34  | protein transport protein Sec61 gamma subunit, putative | -0,7011 | 8,437E-07  |
| TcCLB.510483.20  | mucin-associated surface protein (MASP), putative       | -0,7013 | 0,01462    |
| TcCLB.507241.10  | protein phosphatase 2A regulatory subunit, putative     | -0,7014 | 1,293E-11  |
| TcCLB.511189.50  | hypothetical protein, conserved (pseudogene)            | -0,7017 | 2,259E-09  |
| TcCLB.511487.71  | hypothetical protein                                    | -0,7017 | 3,454E-07  |
| TcCLB.511717.174 | hypothetical protein, conserved                         | -0,702  | 1,614E-08  |
| TcCLB.511321.30  | hypothetical protein, conserved                         | -0,7023 | 0,00005693 |
| TcCLB.506357.130 | hypothetical protein, conserved                         | -0,7026 | 5,071E-26  |
| TcCLB.508221.600 | mucin-associated surface protein (MASP), putative       | -0,7027 | 0,1794     |
| TcCLB.503953.50  | hypothetical protein, conserved                         | -0,7028 | 2,187E-12  |
| TcCLB.507809.100 | hypothetical protein, conserved                         | -0,7029 | 7,051E-20  |

|                   |                                                                 |         |            |
|-------------------|-----------------------------------------------------------------|---------|------------|
| TcCLB.506759.90   | trans-sialidase (pseudogene), putative                          | -0,7032 | 0,0549     |
| TcCLB.510141.10   | thymine-7-hydroxylase, putative                                 | -0,7033 | 0,02031    |
| TcCLB.510409.60   | hypothetical protein, conserved                                 | -0,7034 | 8,88E-10   |
| TcCLB.510819.70   | hypothetical protein, conserved                                 | -0,7035 | 2,703E-07  |
| TcCLB.510307.352  | retrotransposon hot spot protein (RHS, pseudogene), putative    | -0,7036 | 0,00004825 |
| TcCLB.506665.20   | hypothetical protein                                            | -0,7043 | 0,01041    |
| TcCLB.508511.15   | trans-sialidase (pseudogene), putative                          | -0,7048 | 0,3417     |
| TcCLB.509715.40   | fibrillarin, putative                                           | -0,7049 | 6,452E-10  |
| TcCLB.506443.130  | trans-sialidase (pseudogene), putative                          | -0,7049 | 9,22E-10   |
| TcCLB.508387.10   | hypothetical protein, conserved                                 | -0,7049 | 0,0003849  |
| TcCLB.504033.120  | hypothetical protein, conserved                                 | -0,705  | 1,365E-12  |
| TcCLB.511025.70   | chaperonin alpha subunit, putative                              | -0,7052 | 2,459E-24  |
| TcCLB.508357.90   | T-complex protein 1, beta subunit, putative                     | -0,7053 | 4,621E-24  |
| TcCLB.504059.11   | hypothetical protein, conserved (fragment)                      | -0,7055 | 0,00003387 |
| TcCLB.504005.40   | hypothetical protein, conserved                                 | -0,7061 | 0,00000617 |
| TcCLB.507237.150  | hypothetical protein                                            | -0,7061 | 0,1983     |
| TcCLB.508167.10   | mucin-associated surface protein (MASP, pseudogene), putative   | -0,7064 | 0,007936   |
| TcCLB.508879.130  | telomerase component (pseudogene), putative                     | -0,7067 | 4,821E-27  |
| TcCLB.510439.10   | heat shock protein 70, putative                                 | -0,7074 | 3,429E-07  |
| TcCLB.504049.30   | trans-sialidase (pseudogene), putative                          | -0,7076 | 0,02916    |
| TcCLB.510553.50   | UDP-Gal or UDP-GlcNAc-dependent glycosyltransferase, putative   | -0,7078 | 0,02819    |
| TcCLB.507739.110  | myosin IB heavy chain, putative                                 | -0,7079 | 4,34E-19   |
| TcCLB.511737.10   | small glutamine-rich tetratricopeptide repeat protein, putative | -0,708  | 3,477E-13  |
| TcCLB.506205.49   | hypothetical protein, conserved                                 | -0,7084 | 0,07201    |
| TcCLB.510389.10   | hypothetical protein, conserved (pseudogene)                    | -0,7085 | 0,0007044  |
| TcCLB.507011.250  | hypothetical protein, conserved                                 | -0,7093 | 8,108E-21  |
| TcCLB.504081.90   | mucin-associated surface protein (MASP), putative               | -0,7096 | 0,02702    |
| TcCLB.509233.210  | hypothetical protein, conserved                                 | -0,7097 | 6,945E-11  |
| TcCLB.511445.30   | hypothetical protein, conserved                                 | -0,7105 | 2,193E-10  |
| TcCLB.420091.10   | dispersed gene family protein 1 (DGF-1), putative               | -0,7106 | 0,003227   |
| TcCLB.511611.5    | mucin TcMUCII (pseudogene), putative                            | -0,7107 | 0,2576     |
| TcCLB.506925.250  | hypothetical protein, conserved (pseudogene)                    | -0,7109 | 1,045E-07  |
| TcCLB.506147.130  | hypothetical protein, conserved                                 | -0,711  | 0,001476   |
| TcCLB.503989.10   | zinc finger protein 2, putative                                 | -0,7111 | 3,447E-10  |
| TcCLB.511021.80   | hypothetical protein, conserved                                 | -0,7116 | 3,23E-11   |
| TcCLB.510421.10   | surface protease GP63 (pseudogene), putative                    | -0,712  | 0,01817    |
| TcCLB.506859.180  | hypothetical protein, conserved                                 | -0,7121 | 0,0006865  |
| TcCLB.509911.124  | hypothetical protein, conserved                                 | -0,7122 | 3,427E-06  |
| TcCLB.511553.71   | syntaxin binding protein (pseudogene), putative                 | -0,7122 | 0,05101    |
| TcCLB.510101.470  | PUF nine target 1                                               | -0,7123 | 1,057E-19  |
| TcCLB.508153.1100 | mitochondrial protein 99, putative (MP99)                       | -0,7123 | 1,36E-11   |
| TcCLB.507993.390  | pyruvate kinase 2, putative                                     | -0,7125 | 1,699E-09  |
| TcCLB.401473.9    | DNA-directed rna polymerase I largest subunit, putative         | -0,7127 | 0,00000985 |
| TcCLB.510397.10   | hypothetical protein, conserved                                 | -0,7131 | 3,403E-12  |
| TcCLB.482471.19   | ATP-dependent RNA helicase SUB2, putative (fragment) (S         | -0,7131 | 4,698E-09  |

|                  |                                                           |         |            |
|------------------|-----------------------------------------------------------|---------|------------|
| TcCLB.511255.625 | surface protease GP63 (pseudogene), putative              | -0,7132 | 0,2401     |
| TcCLB.507041.60  | syntaxin binding protein (pseudogene), putative           | -0,7133 | 0,0007382  |
| TcCLB.510269.55  | elongation factor 1-gamma (EF-1-gamma, pseudogene), p     | -0,7133 | 0,1365     |
| TcCLB.508637.30  | hypothetical protein, conserved (pseudogene)              | -0,7143 | 0,01033    |
| TcCLB.507881.60  | protein kinase, putative                                  | -0,7144 | 0,001339   |
| TcCLB.507603.240 | hypothetical protein, conserved                           | -0,7149 | 3,249E-09  |
| TcCLB.511287.34  | hypothetical protein, conserved                           | -0,715  | 1,613E-08  |
| TcCLB.511139.40  | ATP-dependent RNA helicase SUB2, putative (fragment) (S   | -0,7152 | 0,00000601 |
| TcCLB.507639.110 | hypothetical protein, conserved                           | -0,7154 | 1,376E-09  |
| TcCLB.506559.20  | hypothetical protein, conserved                           | -0,7156 | 5,125E-14  |
| TcCLB.503775.60  | hypothetical protein                                      | -0,7159 | 0,004408   |
| TcCLB.503707.9   | dispersed gene family protein 1 (DGF-1, pseudogene), puta | -0,7162 | 0,0001602  |
| TcCLB.511717.10  | hypothetical protein, conserved (pseudogene)              | -0,7162 | 0,005804   |
| TcCLB.508995.10  | protein kinase, putative                                  | -0,7168 | 0,00000783 |
| TcCLB.511453.10  | dispersed gene family protein 1 (DGF-1), putative         | -0,7169 | 0,006513   |
| TcCLB.510149.100 | hypothetical protein, conserved                           | -0,717  | 5,298E-07  |
| TcCLB.508507.9   | hypothetical protein, conserved                           | -0,7172 | 0,00004054 |
| TcCLB.510817.50  | trans-sialidase, Group II, putative                       | -0,7172 | 0,00005868 |
| TcCLB.511731.50  | ATP-dependent RNA helicase, putative                      | -0,7173 | 7,622E-10  |
| TcCLB.506181.150 | hypothetical protein (fragment)                           | -0,7175 | 7,023E-16  |
| TcCLB.508717.20  | NADH dehydrogenase, putative                              | -0,7176 | 2,769E-13  |
| TcCLB.510017.30  | mucin-associated surface protein (MASP, pseudogene), pu   | -0,7176 | 0,09905    |
| TcCLB.503581.10  | hypothetical protein, conserved                           | -0,7179 | 1,481E-13  |
| TcCLB.508167.29  | mucin-associated surface protein (MASP), putative (fragm  | -0,7183 | 0,08375    |
| TcCLB.508169.9   | elongation factor 2, putative (fragment)                  | -0,7184 | 8,156E-17  |
| TcCLB.508153.630 | mitochondrial carrier protein, putative                   | -0,7184 | 7,225E-06  |
| TcCLB.509419.245 | hypothetical protein, conserved (pseudogene)              | -0,7186 | 0,004491   |
| TcCLB.506623.60  | dispersed gene family protein 1 (DGF-1), putative         | -0,7188 | 0,01221    |
| TcCLB.507603.70  | kinetoplastid kinetochore protein 6, putative (kkt6)      | -0,7189 | 0,0001964  |
| TcCLB.505229.20  | conserved protein, unknown function                       | -0,7191 | 2,545E-16  |
| TcCLB.509937.80  | hypothetical protein, conserved                           | -0,7191 | 1,021E-08  |
| TcCLB.510401.31  | retrotransposon hot spot protein (RHS, pseudogene), putat | -0,7191 | 0,1864     |
| TcCLB.511531.9   | chaperone DNAJ protein, putative                          | -0,7193 | 1,246E-06  |
| TcCLB.511089.15  | hypothetical protein                                      | -0,7193 | 0,09275    |
| TcCLB.510877.40  | hypothetical protein, conserved                           | -0,7195 | 1,574E-18  |
| TcCLB.409139.9   | trans-sialidase, putative                                 | -0,7195 | 0,1565     |
| TcCLB.507093.170 | hypothetical protein, conserved                           | -0,7196 | 5,371E-22  |
| TcCLB.506437.30  | amastin, putative                                         | -0,7198 | 9,675E-10  |
| TcCLB.511751.120 | aldehyde dehydrogenase family, putative                   | -0,7201 | 9,214E-08  |
| TcCLB.510725.50  | hypothetical protein, conserved                           | -0,7205 | 2,991E-13  |
| TcCLB.506203.10  | nucleoside transporter 1, putative                        | -0,7212 | 6,463E-09  |
| TcCLB.506357.90  | DNA-directed RNA polymerase II/III subunit, putative      | -0,7212 | 6,532E-08  |
| TcCLB.509941.120 | protein kinase, putative                                  | -0,7213 | 8,448E-10  |
| TcCLB.506601.31  | surface protease GP63 (pseudogene), putative              | -0,7213 | 0,2179     |
| TcCLB.506673.50  | apurinic/aprimidinic endonuclease, putative               | -0,7214 | 0,00006118 |

|                  |                                                               |         |            |
|------------------|---------------------------------------------------------------|---------|------------|
| TcCLB.509171.60  | hypothetical protein, conserved                               | -0,722  | 1,733E-09  |
| TcCLB.506917.60  | mucin TcMUCII, putative                                       | -0,722  | 0,1616     |
| TcCLB.508781.129 | arginine N-methyltransferase, type II, putative               | -0,7223 | 0,00001274 |
| TcCLB.509611.40  | hypothetical protein, conserved                               | -0,7223 | 0,01334    |
| TcCLB.506247.120 | hypothetical protein, conserved                               | -0,7225 | 2,061E-14  |
| TcCLB.509611.100 | lipoate-protein ligase, putative                              | -0,7225 | 1,797E-06  |
| TcCLB.510287.60  | ribonuclease HII, putative                                    | -0,7226 | 4,431E-08  |
| TcCLB.407335.18  | hypothetical protein, conserved                               | -0,7227 | 4,134E-06  |
| TcCLB.504257.70  | valyl-tRNA synthetase, putative                               | -0,7229 | 3,961E-18  |
| TcCLB.503727.29  | hypothetical protein                                          | -0,7229 | 1,501E-09  |
| TcCLB.507971.29  | hypothetical protein, conserved                               | -0,7229 | 0,00006705 |
| TcCLB.503451.9   | hypothetical protein, conserved (fragment)                    | -0,723  | 2,668E-19  |
| TcCLB.506147.120 | hypothetical protein, conserved                               | -0,7232 | 6,099E-08  |
| TcCLB.506411.10  | thimet oligopeptidase, putative                               | -0,7235 | 1,012E-16  |
| TcCLB.506315.20  | hypothetical protein, conserved                               | -0,7236 | 1,074E-08  |
| TcCLB.433717.10  | dispersed gene family protein 1 (DGF-1, pseudogene), putative | -0,7236 | 0,01265    |
| TcCLB.511255.190 | trans-sialidase, Group V, putative                            | -0,7238 | 0,02401    |
| TcCLB.504201.50  | mucin-associated surface protein (MASP), putative             | -0,7241 | 0,05794    |
| TcCLB.506729.90  | hypothetical protein, conserved                               | -0,7242 | 5,471E-11  |
| TcCLB.508153.680 | RNA-binding protein 6, putative                               | -0,7243 | 0,01075    |
| TcCLB.506925.390 | MP44, putative                                                | -0,7244 | 1,095E-08  |
| TcCLB.508637.114 | histone deacetylase 1, putative                               | -0,725  | 0,00004285 |
| TcCLB.505765.10  | hypothetical protein, conserved (pseudogene)                  | -0,7259 | 0,00003835 |
| TcCLB.508215.6   | hypothetical protein, conserved                               | -0,7264 | 5,95E-10   |
| TcCLB.508577.40  | dispersed gene family protein 1 (DGF-1), putative             | -0,7264 | 6,339E-06  |
| TcCLB.510497.40  | trans-sialidase, Group V, putative                            | -0,7265 | 0,033      |
| TcCLB.511467.70  | hypothetical protein, conserved                               | -0,7266 | 0,0003964  |
| TcCLB.509525.100 | trans-sialidase (pseudogene), putative                        | -0,7271 | 0,006051   |
| TcCLB.508647.10  | hypothetical protein, conserved                               | -0,7273 | 7,114E-12  |
| TcCLB.510421.270 | hypothetical protein, conserved                               | -0,7273 | 0,0002036  |
| TcCLB.508165.200 | trans-sialidase (pseudogene), putative                        | -0,7273 | 0,06516    |
| TcCLB.510187.270 | transmembrane emp24 domain-containing protein                 | -0,7274 | 2,981E-09  |
| TcCLB.508681.40  | dispersed gene family protein 1 (DGF-1), putative             | -0,7275 | 0,1287     |
| TcCLB.507625.90  | hypothetical protein, conserved                               | -0,7278 | 6,166E-06  |
| TcCLB.503641.10  | hypothetical protein, conserved                               | -0,7281 | 3,093E-11  |
| TcCLB.508813.40  | surface protease GP63, putative                               | -0,7281 | 0,00002209 |
| TcCLB.506443.30  | hypothetical protein, conserved                               | -0,7283 | 2,461E-10  |
| TcCLB.507927.70  | hypothetical protein, conserved                               | -0,7283 | 0,0000186  |
| TcCLB.506865.20  | hypothetical protein                                          | -0,7284 | 2,134E-08  |
| TcCLB.509233.80  | heat shock protein DNAJ, putative                             | -0,7287 | 1,799E-12  |
| TcCLB.510545.73  | syntaxin binding protein (pseudogene), putative               | -0,729  | 0,01446    |
| TcCLB.503931.14  | hypothetical protein, conserved                               | -0,7299 | 1,424E-08  |
| TcCLB.510043.20  | hypothetical protein, conserved (pseudogene)                  | -0,73   | 4,732E-18  |
| TcCLB.506579.80  | hypothetical protein, conserved                               | -0,7305 | 1,215E-09  |
| TcCLB.507951.140 | U2 small nuclear ribonucleoprotein B, putative                | -0,7311 | 0,001467   |



|                  |                                                         |         |            |
|------------------|---------------------------------------------------------|---------|------------|
| TcCLB.505937.29  | dispersed gene family protein 1 (DGF-1), putative       | -0,7312 | 0,01787    |
| TcCLB.510013.200 | 90 kDa surface protein, putative                        | -0,7315 | 0,03267    |
| TcCLB.510359.90  | hypothetical protein, conserved                         | -0,7318 | 3,959E-06  |
| TcCLB.503603.20  | hypothetical protein, conserved                         | -0,7323 | 2,857E-09  |
| TcCLB.506831.20  | amino acid permease, putative                           | -0,7324 | 9,873E-07  |
| TcCLB.511439.60  | hypothetical protein, conserved                         | -0,7324 | 0,00000252 |
| TcCLB.510297.60  | zinc transporter, putative                              | -0,7325 | 2,36E-09   |
| TcCLB.511911.150 | nucleotide-binding protein, putative                    | -0,7326 | 4,225E-06  |
| TcCLB.508625.40  | hypothetical protein, conserved                         | -0,7327 | 0,00001591 |
| TcCLB.511529.120 | hypothetical protein, conserved                         | -0,7329 | 3,934E-06  |
| TcCLB.511725.250 | chaperonin containing t-complex protein, putative       | -0,733  | 1,34E-36   |
| TcCLB.503687.40  | 40 kDa cyclophilin, putative (CYP40)                    | -0,7339 | 7,603E-18  |
| TcCLB.508277.120 | ribosomal protein S6, putative                          | -0,734  | 8,832E-09  |
| TcCLB.450155.9   | hypothetical protein, conserved                         | -0,7341 | 0,00001314 |
| TcCLB.509213.70  | ribulose-5-phosphate 3-epimerase, putative              | -0,7342 | 5,066E-08  |
| TcCLB.506321.340 | hypothetical protein, conserved                         | -0,7342 | 1,514E-07  |
| TcCLB.508961.20  | hypothetical protein, conserved                         | -0,7349 | 1,057E-06  |
| TcCLB.508231.60  | ubiquitin-protein ligase, putative                      | -0,7351 | 3,446E-29  |
| TcCLB.506501.341 | surface protease GP63 (pseudogene), putative            | -0,7351 | 0,1733     |
| TcCLB.505555.50  | hypothetical protein                                    | -0,7352 | 1,236E-20  |
| TcCLB.510515.60  | cytosolic leucyl aminopeptidase, putative               | -0,7352 | 1,888E-11  |
| TcCLB.508187.30  | surface protease GP63, putative (fragment)              | -0,7352 | 0,04075    |
| TcCLB.510969.40  | hypothetical protein, conserved                         | -0,7353 | 3,997E-10  |
| TcCLB.506999.10  | hypothetical protein, conserved                         | -0,7359 | 5,802E-07  |
| TcCLB.473703.10  | surface protease GP63, putative                         | -0,7359 | 0,1882     |
| TcCLB.508461.150 | hypothetical protein, conserved                         | -0,736  | 1,904E-07  |
| TcCLB.508047.25  | elongation factor 1-gamma (EF-1-gamma, pseudogene), p   | -0,7362 | 0,1725     |
| TcCLB.510421.250 | hypothetical protein, conserved                         | -0,7368 | 2,754E-14  |
| TcCLB.511533.5   | mitogen activated protein kinase (pseudogene), putative | -0,7368 | 0,07378    |
| TcCLB.510249.14  | hypothetical protein, conserved                         | -0,7368 | 0,2383     |
| TcCLB.507091.80  | mucin-associated surface protein (MASP), putative       | -0,7369 | 0,2043     |
| TcCLB.504155.221 | surface protease GP63 (pseudogene), putative            | -0,7369 | 0,3469     |
| TcCLB.510757.9   | hypothetical protein, conserved (fragment)              | -0,7375 | 2,51E-10   |
| TcCLB.508725.10  | CCR4-NOT transcription complex subunit 10, putative     | -0,7377 | 4,69E-13   |
| TcCLB.510323.4   | katanin, putative                                       | -0,7379 | 1,571E-11  |
| TcCLB.508919.140 | hypothetical protein, conserved                         | -0,738  | 1,117E-25  |
| TcCLB.510279.349 | mucin-associated surface protein (MASP), putative       | -0,7381 | 0,0736     |
| TcCLB.510817.21  | hypothetical protein                                    | -0,7385 | 0,0004402  |
| TcCLB.504233.50  | hypothetical protein, conserved                         | -0,7385 | 0,2501     |
| TcCLB.511587.120 | Octanoyltransferase, putative                           | -0,7391 | 0,007346   |
| TcCLB.506321.200 | mucin-associated surface protein (MASP), putative       | -0,7393 | 0,07751    |
| TcCLB.506933.98  | dual specificity protein phosphatase, putative          | -0,7394 | 8,011E-10  |
| TcCLB.510053.40  | hypothetical protein, conserved                         | -0,7394 | 0,00001523 |
| TcCLB.506925.300 | cyclophilin a, putative (CYPA)                          | -0,7399 | 3,412E-11  |
| TcCLB.507515.40  | hypothetical protein, conserved                         | -0,7401 | 2,218E-06  |

|                  |                                                                  |         |            |
|------------------|------------------------------------------------------------------|---------|------------|
| TcCLB.506749.10  | flagellar calcium-binding-like protein, putative                 | -0,7402 | 1,146E-15  |
| TcCLB.508607.70  | trans-sialidase (pseudogene), putative                           | -0,7403 | 1,383E-06  |
| TcCLB.510223.5   | guanine nucleotide exchange factor subunit GCD2                  | -0,7406 | 0,05473    |
| TcCLB.510681.20  | myosin heavy chain kinase A, putative                            | -0,7407 | 6,394E-08  |
| TcCLB.504109.140 | DNA-directed RNA polymerase I subunit, putative                  | -0,7409 | 1,379E-07  |
| TcCLB.508175.60  | hypothetical protein, conserved                                  | -0,7412 | 4,855E-07  |
| TcCLB.503917.14  | hypothetical protein, conserved                                  | -0,7415 | 4,892E-09  |
| TcCLB.510629.200 | retrotransposon hot spot protein (RHS, pseudogene), putative     | -0,7415 | 0,005903   |
| TcCLB.504171.50  | hypothetical protein, conserved                                  | -0,7416 | 5,107E-22  |
| TcCLB.506341.30  | beta galactofuranosyl glycosyltransferase, putative              | -0,7418 | 2,072E-10  |
| TcCLB.507611.180 | hypothetical protein                                             | -0,742  | 0,02819    |
| TcCLB.504181.40  | cdc2-related kinase 1, putative (TzCRK1)                         | -0,7426 | 1,516E-09  |
| TcCLB.507583.20  | nucleolar protein, putative                                      | -0,7431 | 4,063E-09  |
| TcCLB.506855.290 | hypothetical protein, conserved                                  | -0,7435 | 5,067E-08  |
| TcCLB.506469.90  | hypothetical protein, conserved                                  | -0,7437 | 0,000432   |
| TcCLB.507829.19  | Vacuolar protein sorting-associated protein 16 homolog, putative | -0,7439 | 0,00007882 |
| TcCLB.509803.50  | hypothetical protein, conserved                                  | -0,744  | 2,305E-12  |
| TcCLB.507459.10  | hypothetical protein, conserved (pseudogene)                     | -0,744  | 0,02756    |
| TcCLB.506321.290 | stress-induced protein sti1, putative                            | -0,7441 | 2,743E-25  |
| TcCLB.432067.10  | ATP-dependent RNA helicase, putative                             | -0,7441 | 0,00002023 |
| TcCLB.484299.10  | trypanothione reductase, putative                                | -0,7442 | 2,774E-09  |
| TcCLB.510279.230 | trans-sialidase, Group VI, putative                              | -0,7444 | 0,05734    |
| TcCLB.508813.15  | heat shock protein 70, putative (fragment)                       | -0,7445 | 0,00001392 |
| TcCLB.511287.150 | fibrillarin, putative                                            | -0,7449 | 4,466E-10  |
| TcCLB.510359.170 | AAA ATPase, putative                                             | -0,7453 | 1,805E-24  |
| TcCLB.508897.110 | macrophage infectivity potentiator, precursor, putative (MIP)    | -0,7456 | 1,233E-12  |
| TcCLB.508163.190 | dispersed gene family protein 1 (DGF-1), putative                | -0,7456 | 0,00314    |
| TcCLB.509647.40  | hypothetical protein, conserved                                  | -0,7459 | 1,462E-08  |
| TcCLB.506625.160 | hypothetical protein, conserved                                  | -0,746  | 3,296E-23  |
| TcCLB.508013.40  | trans-sialidase, Group VI, putative                              | -0,746  | 0,006766   |
| TcCLB.510533.10  | Cytoplasmic dynein 1 heavy chain (DYNC1H1), putative             | -0,7462 | 1,657E-16  |
| TcCLB.430727.9   | inositol phosphatidylinositol phosphatase, putative              | -0,7472 | 0,00000318 |
| TcCLB.510595.20  | hypothetical protein, conserved                                  | -0,7474 | 5,774E-08  |
| TcCLB.511635.20  | histone H2B, putative                                            | -0,7477 | 4,277E-19  |
| TcCLB.509795.80  | hypothetical protein, conserved                                  | -0,7477 | 1,234E-13  |
| TcCLB.503735.40  | hypothetical protein                                             | -0,7478 | 4,775E-08  |
| TcCLB.509525.180 | mucin TcMUCII, putative                                          | -0,7478 | 0,1547     |
| TcCLB.503717.90  | surface protease GP63, putative                                  | -0,7479 | 0,1101     |
| TcCLB.509045.10  | hypothetical protein, conserved                                  | -0,7484 | 6,434E-06  |
| TcCLB.505035.20  | DNA-directed RNA polymerase II subunit 2 (pseudogene), putative  | -0,7489 | 1,146E-07  |
| TcCLB.487507.10  | tryparedoxin peroxidase, putative                                | -0,7492 | 3,868E-07  |
| TcCLB.504703.20  | hypothetical protein, conserved                                  | -0,7499 | 2,58E-15   |
| TcCLB.506393.189 | retrotransposon hot spot (RHS) protein, putative (fragment)      | -0,7499 | 0,0005215  |
| TcCLB.511381.19  | hypothetical protein, conserved (fragment)                       | -0,7502 | 1,1E-11    |
| TcCLB.506609.30  | trans-sialidase, Group V, putative                               | -0,7502 | 0,2552     |

|                  |                                                         |         |            |
|------------------|---------------------------------------------------------|---------|------------|
| TcCLB.504109.20  | hypothetical protein, conserved                         | -0,7503 | 1,303E-15  |
| TcCLB.507007.70  | hypothetical protein, conserved                         | -0,7503 | 2,107E-11  |
| TcCLB.511067.14  | hypothetical protein, conserved                         | -0,7511 | 0,00001331 |
| TcCLB.505997.31  | ATP-dependent DEAD/H RNA helicase (pseudogene), putat   | -0,7513 | 0,01477    |
| TcCLB.511025.100 | chaperone DNAJ protein, putative                        | -0,7515 | 5,431E-14  |
| TcCLB.510323.80  | hypothetical protein, conserved                         | -0,7519 | 2,07E-14   |
| TcCLB.506165.16  | protein kinase, putative                                | -0,7519 | 0,00571    |
| TcCLB.510763.60  | hypothetical protein, conserved                         | -0,7522 | 1,499E-06  |
| TcCLB.507649.20  | hypothetical protein, conserved                         | -0,7526 | 1,262E-22  |
| TcCLB.510443.9   | valyl-tRNA synthetase, putative                         | -0,7528 | 1,339E-18  |
| TcCLB.507801.160 | hypothetical protein, conserved                         | -0,7528 | 2,492E-08  |
| TcCLB.510187.510 | hypothetical protein, conserved                         | -0,753  | 7,63E-10   |
| TcCLB.482369.20  | hypothetical protein, conserved                         | -0,7531 | 1,637E-20  |
| TcCLB.509471.95  | histone H3, putative                                    | -0,7531 | 5,986E-08  |
| TcCLB.508535.40  | hypothetical protein, conserved                         | -0,7532 | 0,0001494  |
| TcCLB.510933.10  | trans-sialidase, Group V, putative                      | -0,7532 | 0,01083    |
| TcCLB.509951.10  | nucleolar protein, putative                             | -0,7534 | 0,00001379 |
| TcCLB.508221.460 | mucin-associated surface protein (MASP, pseudogene), pu | -0,7537 | 0,03898    |
| TcCLB.506529.50  | arginine N-methyltransferase, putative                  | -0,7539 | 7,688E-12  |
| TcCLB.507941.100 | hypothetical protein, conserved                         | -0,7541 | 3,541E-10  |
| TcCLB.507093.66  | hypothetical protein, conserved                         | -0,7543 | 7,685E-09  |
| TcCLB.507735.20  | hypothetical protein, conserved                         | -0,7546 | 1,144E-21  |
| TcCLB.510319.9   | hypothetical protein, conserved                         | -0,7546 | 3,719E-08  |
| TcCLB.504039.57  | mucin-associated surface protein (MASP, pseudogene), pu | -0,7549 | 0,3509     |
| TcCLB.510539.10  | mucin-associated surface protein (MASP), putative       | -0,7551 | 0,3586     |
| TcCLB.503515.7   | ribosomal RNA methyltransferase, putative (fragment)    | -0,7553 | 0,00006569 |
| TcCLB.506575.20  | hypothetical protein, conserved                         | -0,7554 | 0,00358    |
| TcCLB.506947.50  | hypothetical protein, conserved                         | -0,7555 | 1,544E-08  |
| TcCLB.508257.230 | target of rapamycin kinase (TOR) kinase 3, putative     | -0,7556 | 2,441E-29  |
| TcCLB.510819.110 | ATP-dependent RNA helicase, putative                    | -0,7557 | 1,318E-16  |
| TcCLB.507201.9   | dispersed gene family protein 1 (DGF-1), putative       | -0,7566 | 1,877E-06  |
| TcCLB.506885.350 | proteasome alpha 1 subunit, putative                    | -0,7568 | 1,988E-13  |
| TcCLB.508693.150 | hypothetical protein, conserved                         | -0,7569 | 6,577E-10  |
| TcCLB.509993.5   | hypothetical protein, conserved (pseudogene)            | -0,7569 | 3,222E-06  |
| TcCLB.508153.160 | hypothetical protein, conserved                         | -0,7572 | 1,997E-06  |
| TcCLB.508661.60  | GPI transamidase component Tta2, putative (TTA2)        | -0,7576 | 3,309E-12  |
| TcCLB.508365.171 | elongation factor 1-gamma (EF-1-gamma, pseudogene), p   | -0,7576 | 0,07033    |
| TcCLB.503999.30  | hypothetical protein, conserved                         | -0,7579 | 5,459E-22  |
| TcCLB.504013.20  | hypothetical protein                                    | -0,758  | 1,167E-06  |
| TcCLB.505567.31  | mucin-associated surface protein (MASP, pseudogene), pu | -0,7582 | 0,3597     |
| TcCLB.511149.180 | trans-sialidase, Group VI, putative                     | -0,7586 | 0,008479   |
| TcCLB.504433.10  | ADP-ribosylation factor-like protein 3, putative (arl3) | -0,7593 | 8,188E-09  |
| TcCLB.507867.70  | prefoldin subunit, putative                             | -0,7593 | 0,00001804 |
| TcCLB.508221.360 | mucin-associated surface protein (MASP, pseudogene), pu | -0,7595 | 0,144      |
| TcCLB.504839.50  | nucleosome assembly protein-like protein, putative      | -0,7597 | 2,799E-17  |

|                  |                                                          |         |            |
|------------------|----------------------------------------------------------|---------|------------|
| TcCLB.510293.79  | GPI transamidase component Tta2, putative (fragment) (T  | -0,7597 | 5,638E-08  |
| TcCLB.464415.10  | hypothetical protein                                     | -0,7598 | 0,05633    |
| TcCLB.510901.130 | hypothetical protein, conserved                          | -0,76   | 1,161E-08  |
| TcCLB.506963.80  | hypothetical protein, conserved                          | -0,7601 | 4,997E-18  |
| TcCLB.511557.60  | hypothetical protein, conserved                          | -0,7604 | 0,00002245 |
| TcCLB.509583.10  | chaperonin TCP20, putative                               | -0,7606 | 3,447E-21  |
| TcCLB.510617.19  | hypothetical protein, conserved                          | -0,7607 | 4,47E-08   |
| TcCLB.506943.90  | hypothetical protein, conserved                          | -0,7607 | 0,0000232  |
| TcCLB.506769.10  | hypothetical protein                                     | -0,7607 | 0,1427     |
| TcCLB.509233.140 | aldehyde dehydrogenase (pseudogene), putative            | -0,761  | 0,004773   |
| TcCLB.511633.10  | hypothetical protein, conserved                          | -0,7614 | 0,1471     |
| TcCLB.508637.63  | hypothetical protein, conserved                          | -0,7615 | 3,06E-14   |
| TcCLB.508737.194 | ARP2/3 complex subunit, putative                         | -0,7616 | 3,519E-07  |
| TcCLB.510491.50  | hypothetical protein, conserved                          | -0,7617 | 0,001037   |
| TcCLB.511233.70  | hypothetical protein, conserved                          | -0,7625 | 3,941E-20  |
| TcCLB.506335.110 | trans-sialidase (pseudogene), putative                   | -0,7625 | 0,0009801  |
| TcCLB.506309.130 | trans-sialidase (pseudogene), putative                   | -0,7629 | 0,2234     |
| TcCLB.508181.149 | hypothetical protein, conserved                          | -0,7632 | 0,002158   |
| TcCLB.510655.90  | Importin 1 (IMP1)                                        | -0,7633 | 9,218E-30  |
| TcCLB.508839.40  | hypothetical protein, conserved                          | -0,7641 | 8,958E-08  |
| TcCLB.510187.320 | hypothetical protein                                     | -0,7643 | 1,125E-11  |
| TcCLB.504247.20  | ATP-dependent RNA helicase, putative                     | -0,7645 | 1,668E-17  |
| TcCLB.506107.20  | dihydrouridine synthase (Dus), putative                  | -0,7645 | 0,0002022  |
| TcCLB.508253.20  | trans-sialidase (pseudogene), putative                   | -0,7648 | 0,05477    |
| TcCLB.510759.190 | hypothetical protein, conserved                          | -0,7649 | 7,491E-15  |
| TcCLB.509591.50  | RNA-binding protein 34, putative (RBP34)                 | -0,7656 | 1,815E-10  |
| TcCLB.507609.10  | nucleoporin interacting component (NUP93), putative      | -0,7659 | 5,139E-09  |
| TcCLB.506275.9   | RNA polymerase-associated protein CDC73, putative        | -0,7659 | 1,328E-06  |
| TcCLB.511759.20  | trans-sialidase (pseudogene), putative                   | -0,7665 | 1,493E-09  |
| TcCLB.507023.260 | hypothetical protein, conserved                          | -0,767  | 1,035E-10  |
| TcCLB.509891.50  | hypothetical protein, conserved                          | -0,7672 | 7,853E-06  |
| TcCLB.510221.20  | hypothetical protein, conserved                          | -0,7677 | 1,913E-09  |
| TcCLB.507259.16  | protein kinase, putative (fragment)                      | -0,7679 | 0,08998    |
| TcCLB.510269.73  | hypothetical protein, conserved (pseudogene)             | -0,7681 | 0,0004412  |
| TcCLB.511437.10  | surface protease GP63, putative                          | -0,7686 | 0,00088    |
| TcCLB.508847.9   | dispersed gene family protein 1 (DGF-1), putative        | -0,7686 | 0,1017     |
| TcCLB.511339.20  | C-5 sterol desaturase, putative                          | -0,7687 | 1,044E-08  |
| TcCLB.511283.184 | hypothetical protein, conserved                          | -0,7687 | 1,053E-06  |
| TcCLB.503803.4   | serine/threonine protein phosphatase 2A regulatory subun | -0,7687 | 0,00009309 |
| TcCLB.505999.4   | hypothetical protein, conserved                          | -0,7688 | 1,794E-06  |
| TcCLB.510771.9   | hypothetical protein, conserved (fragment)               | -0,769  | 2,649E-21  |
| TcCLB.508159.40  | dispersed gene family protein 1 (DGF-1), putative        | -0,7695 | 0,002272   |
| TcCLB.446067.9   | hypothetical protein, conserved (fragment)               | -0,7696 | 7,628E-10  |
| TcCLB.466593.19  | hypothetical protein, conserved                          | -0,7706 | 1,62E-09   |
| TcCLB.509555.10  | hypothetical protein (fragment)                          | -0,7708 | 5,254E-10  |

|                  |                                                         |         |            |
|------------------|---------------------------------------------------------|---------|------------|
| TcCLB.510499.20  | hypothetical protein                                    | -0,7708 | 0,0302     |
| TcCLB.508075.30  | hypothetical protein, conserved (pseudogene)            | -0,7709 | 5,876E-08  |
| TcCLB.504215.30  | hypothetical protein, conserved                         | -0,7712 | 2,605E-09  |
| TcCLB.510387.30  | surface protease GP63 (pseudogene), putative            | -0,7713 | 0,05435    |
| TcCLB.511875.5   | elongation factor 1-gamma (EF-1-gamma, pseudogene), p   | -0,7714 | 0,03142    |
| TcCLB.508139.20  | dispersed gene family protein 1 (DGF-1), putative       | -0,7715 | 7,22E-09   |
| TcCLB.508007.10  | trans-sialidase, putative                               | -0,7723 | 0,4989     |
| TcCLB.508813.30  | surface protease GP63 (pseudogene), putative            | -0,7726 | 0,004007   |
| TcCLB.503491.19  | mucin-associated surface protein (MASP), putative       | -0,7728 | 0,02507    |
| TcCLB.508143.65  | elongation factor 1-gamma (EF-1-gamma, pseudogene), p   | -0,7735 | 0,06365    |
| TcCLB.506939.200 | trans-sialidase (pseudogene), putative                  | -0,774  | 0,00674    |
| TcCLB.504741.90  | hypothetical protein, conserved                         | -0,7741 | 5,808E-07  |
| TcCLB.510487.70  | trans-sialidase (pseudogene), putative                  | -0,7742 | 0,003389   |
| TcCLB.507165.50  | cysteine synthase, putative                             | -0,7744 | 3,803E-07  |
| TcCLB.508775.30  | dispersed gene family protein 1 (DGF-1), putative       | -0,7744 | 0,004027   |
| TcCLB.509551.140 | hypothetical protein, conserved                         | -0,7747 | 2,961E-17  |
| TcCLB.509733.90  | hypothetical protein, conserved                         | -0,7751 | 1,214E-19  |
| TcCLB.508873.344 | mucin-associated surface protein (MASP, pseudogene), pu | -0,7751 | 0,01665    |
| TcCLB.509799.80  | hypothetical protein, conserved                         | -0,7752 | 9,651E-12  |
| TcCLB.508727.30  | hypothetical protein, conserved                         | -0,7753 | 0,00001812 |
| TcCLB.508957.14  | hypothetical protein, conserved (fragment)              | -0,7757 | 4,704E-08  |
| TcCLB.506753.249 | hypothetical protein, conserved                         | -0,7761 | 0,1277     |
| TcCLB.509741.50  | kinesin-like protein (pseudogene), putative             | -0,7763 | 0,000212   |
| TcCLB.510955.30  | hypothetical protein, conserved                         | -0,7766 | 6,322E-12  |
| TcCLB.507129.30  | C-14 sterol reductase, putative                         | -0,777  | 8,534E-14  |
| TcCLB.508461.410 | T-complex protein 1, eta subunit, putative              | -0,7771 | 4,568E-38  |
| TcCLB.511273.59  | 5-oxoprolinase, putative                                | -0,7771 | 2,742E-12  |
| TcCLB.503899.90  | asparagine synthetase a, putative                       | -0,7772 | 5,395E-06  |
| TcCLB.510741.229 | ubiquitin-activating enzyme E1, putative                | -0,7775 | 1,804E-13  |
| TcCLB.509551.70  | hypothetical protein, conserved                         | -0,7775 | 3,52E-13   |
| TcCLB.509683.130 | aminopeptidase, putative                                | -0,7776 | 2,296E-12  |
| TcCLB.506359.50  | hypothetical protein, conserved                         | -0,7777 | 2,161E-06  |
| TcCLB.506465.5   | hypothetical protein                                    | -0,7777 | 0,00002903 |
| TcCLB.510773.70  | dynein heavy chain, putative                            | -0,7781 | 8,182E-10  |
| TcCLB.504625.40  | hypothetical protein, conserved                         | -0,7782 | 2,421E-12  |
| TcCLB.505931.40  | histone H3, putative                                    | -0,7784 | 1,945E-06  |
| TcCLB.510275.130 | dispersed gene family protein 1 (DGF-1), putative       | -0,7785 | 0,0005614  |
| TcCLB.506763.370 | hypothetical protein                                    | -0,7785 | 0,2004     |
| TcCLB.510463.230 | dispersed gene family protein 1 (DGF-1), putative       | -0,7787 | 0,02398    |
| TcCLB.509567.34  | hypothetical protein, conserved                         | -0,7788 | 2,116E-10  |
| TcCLB.510061.11  | mucin-associated surface protein (MASP), putative       | -0,7789 | 0,008383   |
| TcCLB.508881.30  | hypothetical protein, conserved                         | -0,779  | 1,89E-09   |
| TcCLB.509871.21  | N-acetyltransferase complex ARD1 subunit (pseudogene),  | -0,7796 | 0,1927     |
| TcCLB.508595.20  | UDP-Gal or UDP-GlcNAc-dependent glycosyltransferase, pu | -0,7798 | 0,002479   |
| TcCLB.506459.235 | hypothetical protein, conserved                         | -0,7806 | 0,0002129  |

|                  |                                                               |         |           |
|------------------|---------------------------------------------------------------|---------|-----------|
| TcCLB.509065.170 | hypothetical protein, conserved                               | -0,7811 | 9,913E-14 |
| TcCLB.417203.9   | dispersed gene family protein 1 (DGF-1), putative             | -0,7811 | 0,005474  |
| TcCLB.510431.120 | hypothetical protein, conserved                               | -0,7818 | 2,862E-10 |
| TcCLB.508823.60  | hypothetical protein, conserved                               | -0,782  | 8,746E-08 |
| TcCLB.506679.90  | RNA editing complex protein MP67, putative                    | -0,7825 | 1,231E-15 |
| TcCLB.510699.20  | mucin-associated surface protein (MASP, pseudogene), pu       | -0,7825 | 0,0004349 |
| TcCLB.506321.60  | surface protease GP63 (pseudogene), putative                  | -0,7826 | 0,02071   |
| TcCLB.511801.10  | hypothetical protein, conserved                               | -0,7828 | 1,138E-19 |
| TcCLB.508219.90  | 90 kDa surface protein, putative                              | -0,7831 | 0,01769   |
| TcCLB.511545.100 | hypothetical protein, conserved                               | -0,7835 | 3,035E-19 |
| TcCLB.511741.10  | hypothetical protein, conserved                               | -0,7836 | 1,257E-06 |
| TcCLB.503955.20  | mitochondrial DNA polymerase beta, putative                   | -0,7846 | 6,519E-23 |
| TcCLB.511337.30  | UDP-Gal or UDP-GlcNAc-dependent glycosyltransferase, pu       | -0,7846 | 0,01169   |
| TcCLB.506965.120 | hypothetical protein                                          | -0,7848 | 0,1081    |
| TcCLB.511519.9   | small glutamine-rich tetratricopeptide repeat protein, puta   | -0,7868 | 3,486E-10 |
| TcCLB.503681.9   | hypothetical protein, conserved                               | -0,7869 | 2,4E-15   |
| TcCLB.506743.4   | eukaryotic translation initiation factor 1A, putative (fragme | -0,7872 | 6,16E-10  |
| TcCLB.503967.4   | hypothetical protein, conserved                               | -0,7873 | 0,002753  |
| TcCLB.411383.10  | surface protease GP63 (pseudogene), putative                  | -0,7874 | 0,1825    |
| TcCLB.507511.40  | G5-interacting protein, putative (G5-IP)                      | -0,7885 | 7,315E-16 |
| TcCLB.511467.20  | hypothetical protein, conserved                               | -0,7889 | 1,317E-37 |
| TcCLB.506009.60  | hypothetical protein                                          | -0,7892 | 7,255E-09 |
| TcCLB.508645.40  | nucleoside transporter 1, putative                            | -0,7897 | 4,396E-38 |
| TcCLB.507915.19  | mismatch repair protein MSH3, putative                        | -0,7906 | 0,0001637 |
| TcCLB.507951.60  | hypothetical protein, conserved                               | -0,7911 | 8,905E-15 |
| TcCLB.505025.10  | mucin-associated surface protein (MASP), putative             | -0,7918 | 0,08221   |
| TcCLB.511485.20  | retrotransposon hot spot protein (RHS, pseudogene), putat     | -0,7919 | 2,636E-06 |
| TcCLB.508323.9   | farnesyl pyrophosphate synthase, putative                     | -0,7921 | 3,961E-13 |
| TcCLB.508427.30  | surface protease GP63 (pseudogene), putative                  | -0,7924 | 0,02713   |
| TcCLB.504017.79  | glycyl-tRNA synthetase, putative                              | -0,7925 | 8,97E-12  |
| TcCLB.511099.20  | trans-sialidase (pseudogene), putative                        | -0,7925 | 0,09837   |
| TcCLB.511871.70  | hypothetical protein, conserved                               | -0,7926 | 2,556E-07 |
| TcCLB.511477.10  | trans-sialidase (pseudogene), putative                        | -0,7929 | 0,1406    |
| TcCLB.508271.30  | hypothetical protein, conserved                               | -0,793  | 6,355E-12 |
| TcCLB.508601.100 | hypothetical protein, conserved                               | -0,7933 | 1,098E-18 |
| TcCLB.503893.150 | hypothetical protein, conserved                               | -0,7938 | 2,578E-10 |
| TcCLB.509053.110 | ubiquitin fusion degradation protein 2, putative              | -0,794  | 5,98E-27  |
| TcCLB.510105.50  | fibrillar, putative                                           | -0,7943 | 9,097E-15 |
| TcCLB.505997.21  | N-acetyltransferase complex ARD1 subunit (pseudogene),        | -0,7944 | 0,07627   |
| TcCLB.509267.50  | U5 small nuclear ribonucleoprotein component, putative        | -0,7945 | 2,663E-19 |
| TcCLB.504005.60  | hypothetical protein, conserved                               | -0,7951 | 0,000051  |
| TcCLB.510337.30  | adenylosuccinate lyase, putative (ADSL)                       | -0,7953 | 2,077E-16 |
| TcCLB.511445.80  | hypothetical protein, conserved                               | -0,7957 | 1,035E-10 |
| TcCLB.511795.10  | hypothetical protein, conserved (pseudogene)                  | -0,7958 | 0,0109    |
| TcCLB.507143.70  | hypothetical protein, conserved                               | -0,7961 | 9,259E-17 |

|                  |                                                           |         |            |
|------------------|-----------------------------------------------------------|---------|------------|
| TcCLB.486901.10  | endonuclease/exonuclease/phosphatase, putative            | -0,7963 | 0,00001128 |
| TcCLB.511261.120 | pumilio/PUF RNA binding protein 2, putative (PUF2)        | -0,7963 | 0,000213   |
| TcCLB.506885.410 | hypothetical protein, conserved                           | -0,7975 | 1,269E-08  |
| TcCLB.511837.40  | hypothetical protein, conserved                           | -0,7975 | 8,186E-07  |
| TcCLB.509157.70  | hypothetical protein, conserved                           | -0,7976 | 0,000493   |
| TcCLB.510209.18  | mucin TcMUCII (pseudogene), putative                      | -0,7983 | 0,09462    |
| TcCLB.508943.30  | RNA-binding protein, putative                             | -0,7984 | 8,228E-09  |
| TcCLB.506947.40  | peroxisome assembly protein, putative                     | -0,7989 | 5,596E-15  |
| TcCLB.508073.10  | surface protease GP63, putative                           | -0,7989 | 0,0001814  |
| TcCLB.508163.390 | hypothetical protein, conserved                           | -0,7989 | 0,001551   |
| TcCLB.508391.10  | dispersed gene family protein 1 (DGF-1), putative         | -0,7997 | 0,004979   |
| TcCLB.508365.160 | mucin-associated surface protein (MASP), putative         | -0,7997 | 0,02719    |
| TcCLB.507089.280 | chaperone DnaJ protein (pseudogene), putative             | -0,8005 | 0,000053   |
| TcCLB.507277.30  | hypothetical protein, conserved                           | -0,8006 | 1,919E-09  |
| TcCLB.511649.39  | hypothetical protein, conserved                           | -0,8007 | 6,822E-06  |
| TcCLB.503973.40  | dispersed gene family protein 1 (DGF-1), putative         | -0,801  | 0,00161    |
| TcCLB.506459.120 | mucin TcMUCII, putative                                   | -0,8017 | 0,06757    |
| TcCLB.506503.69  | glycosomal malate dehydrogenase, putative                 | -0,8023 | 1,016E-23  |
| TcCLB.511357.5   | glycerol uptake protein, putative (fragment)              | -0,8024 | 6,527E-06  |
| TcCLB.507209.10  | small nuclear ribonucleoprotein protein, putative         | -0,8026 | 1,864E-11  |
| TcCLB.511045.40  | subtilisin peptidase                                      | -0,8027 | 1,337E-16  |
| TcCLB.510693.120 | trans-sialidase (pseudogene), putative                    | -0,803  | 0,01076    |
| TcCLB.508207.220 | hypothetical protein, conserved                           | -0,8031 | 0,0001949  |
| TcCLB.510385.5   | hypothetical protein, conserved (pseudogene)              | -0,8031 | 0,001092   |
| TcCLB.506661.150 | hypothetical protein, conserved                           | -0,8032 | 2,763E-06  |
| TcCLB.508853.20  | trans-sialidase, Group V, putative                        | -0,8044 | 0,0006502  |
| TcCLB.411059.18  | clathrin heavy chain, putative                            | -0,8047 | 1,295E-07  |
| TcCLB.507839.18  | hypothetical protein, conserved                           | -0,8048 | 5,709E-10  |
| TcCLB.506625.84  | hypothetical protein, conserved                           | -0,8049 | 3,468E-07  |
| TcCLB.450019.9   | dispersed gene family protein 1 (DGF-1), putative (fragme | -0,8054 | 7,136E-07  |
| TcCLB.508181.10  | hypothetical protein, conserved                           | -0,8055 | 5E-10      |
| TcCLB.503899.80  | hypothetical protein, conserved                           | -0,8057 | 5,597E-14  |
| TcCLB.506363.10  | hypothetical protein                                      | -0,8059 | 0,00001086 |
| TcCLB.508355.380 | cysteine peptidase, Clan CA, family C19, putative         | -0,8062 | 9,973E-06  |
| TcCLB.511173.10  | trans-sialidase, putative                                 | -0,8064 | 0,09817    |
| TcCLB.503423.20  | protein kinase, putative                                  | -0,8072 | 0,1068     |
| TcCLB.509527.154 | mucin-associated surface protein (MASP, pseudogene), pu   | -0,8077 | 0,01279    |
| TcCLB.506885.450 | Kinesin-13 6, putative (KIN13-6)                          | -0,8081 | 5,464E-10  |
| TcCLB.510187.420 | chaperonin HSP60, mitochondrial precursor (pseudogene) (  | -0,8082 | 5,452E-11  |
| TcCLB.446785.10  | trans-sialidase, putative (fragment)                      | -0,8083 | 0,00001808 |
| TcCLB.509805.210 | hypothetical protein, conserved                           | -0,8085 | 2,373E-06  |
| TcCLB.506315.30  | protein phosphatase 1 catalitic subunit, putative         | -0,8088 | 4,522E-13  |
| TcCLB.471467.10  | trans-sialidase, putative (fragment)                      | -0,8093 | 0,002087   |
| TcCLB.511575.60  | isocitrate dehydrogenase [NADP], mitochondrial precursor, | -0,8096 | 4,581E-10  |
| TcCLB.511255.350 | trans-sialidase, Group V, putative                        | -0,8097 | 0,02083    |

|                  |                                                               |         |            |
|------------------|---------------------------------------------------------------|---------|------------|
| TcCLB.508153.330 | vacuolar protein sorting-associated protein 4, putative (VP4) | -0,81   | 5,244E-26  |
| TcCLB.509505.70  | 10 kDa heat shock protein, putative                           | -0,81   | 0,2195     |
| TcCLB.506137.60  | mucin-associated surface protein (MASP), putative             | -0,8106 | 0,2        |
| TcCLB.511367.20  | hypothetical protein                                          | -0,8111 | 0,09627    |
| TcCLB.507859.120 | dispersed gene family protein 1 (DGF-1), putative             | -0,8111 | 0,1321     |
| TcCLB.511163.20  | cdc2-related kinase 8, putative (CRK8)                        | -0,8119 | 2,188E-10  |
| TcCLB.506925.370 | MP44 (pseudogene), putative                                   | -0,8122 | 0,002956   |
| TcCLB.434945.10  | hypothetical protein, conserved                               | -0,8123 | 0,005699   |
| TcCLB.504057.65  | hypothetical protein, conserved                               | -0,8127 | 6,523E-08  |
| TcCLB.508251.10  | hypothetical protein                                          | -0,8127 | 0,0612     |
| TcCLB.508891.90  | hypothetical protein, conserved                               | -0,8128 | 6,694E-15  |
| TcCLB.507851.70  | hypothetical protein                                          | -0,813  | 1,899E-12  |
| TcCLB.510825.10  | hypothetical protein, conserved                               | -0,8138 | 1,133E-09  |
| TcCLB.511911.159 | histone deacetylase 1, putative                               | -0,8141 | 1,699E-06  |
| TcCLB.503687.30  | hypothetical protein, conserved                               | -0,8144 | 0,00000229 |
| TcCLB.506193.5   | glucose-6-phosphate 1-dehydrogenase (pseudogene), putative    | -0,8146 | 0,0004034  |
| TcCLB.510823.60  | hypothetical protein, conserved                               | -0,815  | 1,296E-17  |
| TcCLB.511351.9   | inosine-5'-monophosphate dehydrogenase, putative              | -0,8151 | 2,03E-13   |
| TcCLB.509551.60  | hypothetical protein, conserved                               | -0,8153 | 6,225E-07  |
| TcCLB.508873.260 | hypothetical protein                                          | -0,8154 | 0,1129     |
| TcCLB.506755.160 | AAA ATPase, putative                                          | -0,8156 | 1,179E-31  |
| TcCLB.503945.40  | 6-phosphogluconolactonase, putative                           | -0,8156 | 1,037E-06  |
| TcCLB.506605.70  | hypothetical protein, conserved                               | -0,8157 | 1,913E-16  |
| TcCLB.507069.10  | mucin-associated surface protein (MASP), putative             | -0,816  | 0,009497   |
| TcCLB.511183.130 | hypothetical protein, conserved (pseudogene)                  | -0,816  | 0,05817    |
| TcCLB.511547.10  | mucin-associated surface protein (MASP), putative             | -0,816  | 0,08202    |
| TcCLB.506831.70  | glutamyl-tRNA synthetase, putative                            | -0,8162 | 9,941E-16  |
| TcCLB.425785.18  | hypothetical protein, conserved                               | -0,8166 | 0,002297   |
| TcCLB.510709.41  | hypothetical protein, conserved                               | -0,8183 | 0,07424    |
| TcCLB.506831.79  | pre-mRNA splicing factor ATP-dependent RNA helicase, putative | -0,8192 | 0,0001019  |
| TcCLB.511573.58  | Nucleolar protein 56, putative (fragment) (NOP56)             | -0,8197 | 8,452E-19  |
| TcCLB.509499.29  | hypothetical protein, conserved                               | -0,8202 | 7,637E-07  |
| TcCLB.506265.20  | hypothetical protein, conserved                               | -0,8205 | 4,257E-21  |
| TcCLB.508259.11  | hypothetical protein, conserved (pseudogene)                  | -0,821  | 0,001908   |
| TcCLB.511229.50  | S-adenosylhomocysteine hydrolase, putative                    | -0,8211 | 5,427E-16  |
| TcCLB.510525.40  | hypothetical protein, conserved                               | -0,8211 | 1,142E-07  |
| TcCLB.426897.4   | hypothetical protein, conserved (fragment)                    | -0,8211 | 0,0002178  |
| TcCLB.443971.10  | hypothetical protein, conserved (fragment)                    | -0,8212 | 0,06131    |
| TcCLB.508365.290 | mucin TcMUCII, putative                                       | -0,8218 | 0,05734    |
| TcCLB.511635.10  | histone H2B, putative                                         | -0,822  | 4,498E-26  |
| TcCLB.506699.34  | ATP-dependent 6-phosphofructokinase, glycosomal (pseudogene)  | -0,822  | 1,519E-15  |
| TcCLB.511867.90  | hypothetical protein, conserved                               | -0,822  | 5,266E-09  |
| TcCLB.508965.70  | hypothetical protein, conserved                               | -0,8227 | 0,1095     |
| TcCLB.509729.29  | neurobeachin/beige protein, putative (fragment)               | -0,8229 | 1,206E-13  |
| TcCLB.510799.18  | hypothetical protein, conserved                               | -0,823  | 1,293E-09  |



|                  |                                                            |         |            |
|------------------|------------------------------------------------------------|---------|------------|
| TcCLB.504155.30  | retrotransposon hot spot protein (RHS, pseudogene), putat  | -0,8234 | 0,02178    |
| TcCLB.507389.30  | hypothetical protein                                       | -0,8235 | 4,079E-16  |
| TcCLB.507063.180 | hypothetical protein, conserved                            | -0,8238 | 7,556E-07  |
| TcCLB.511255.420 | mucin-associated surface protein (MASP, pseudogene), pu    | -0,8239 | 0,006001   |
| TcCLB.504099.15  | hypothetical protein                                       | -0,824  | 0,0147     |
| TcCLB.466007.9   | dispersed gene family protein 1 (DGF-1), putative (fragme  | -0,8242 | 0,05565    |
| TcCLB.508831.180 | beta galactofuranosyl glycosyltransferase (pseudogene), pi | -0,8244 | 0,05681    |
| TcCLB.507963.40  | hypothetical protein, conserved                            | -0,8245 | 1,241E-08  |
| TcCLB.470521.10  | protein kinase, putative (fragment)                        | -0,8246 | 1,559E-06  |
| TcCLB.506451.13  | hypothetical protein (pseudogene)                          | -0,825  | 0,00002039 |
| TcCLB.509213.130 | autophagocytosis associated protein, putative              | -0,8252 | 2,199E-08  |
| TcCLB.511367.220 | hypothetical protein, conserved                            | -0,8253 | 3,665E-16  |
| TcCLB.505773.20  | dispersed gene family protein 1 (DGF-1), putative          | -0,8259 | 0,007709   |
| TcCLB.508969.40  | dispersed gene family protein 1 (DGF-1), putative          | -0,8263 | 0,03032    |
| TcCLB.511717.90  | phosphomannose isomerase, putative                         | -0,8266 | 2,981E-12  |
| TcCLB.511485.11  | retrotransposon hot spot protein (RHS, pseudogene), putat  | -0,827  | 0,02515    |
| TcCLB.507809.140 | hypothetical protein, conserved                            | -0,8277 | 4,354E-07  |
| TcCLB.509011.20  | RNA polymerase IIA largest subunit, putative               | -0,8278 | 1,145E-26  |
| TcCLB.508163.360 | dispersed gene family protein 1 (DGF-1), putative          | -0,8289 | 0,0002585  |
| TcCLB.503897.10  | hypothetical protein                                       | -0,829  | 8,784E-18  |
| TcCLB.508871.30  | surface protease GP63 (pseudogene), putative               | -0,8294 | 0,003721   |
| TcCLB.507769.50  | ATP-dependent DEAD/H RNA helicase (pseudogene), putat      | -0,8297 | 5,257E-06  |
| TcCLB.510877.70  | ATP-dependent RNA and DNA helicase, mitochondrial, put:    | -0,83   | 2,893E-17  |
| TcCLB.508265.60  | hypothetical protein, conserved (pseudogene)               | -0,83   | 3,098E-15  |
| TcCLB.510187.490 | hypothetical protein, conserved                            | -0,83   | 2,825E-08  |
| TcCLB.508539.10  | hypothetical protein, conserved                            | -0,8302 | 0,003216   |
| TcCLB.504741.190 | hypothetical protein, conserved                            | -0,8313 | 9,683E-07  |
| TcCLB.509793.20  | hypothetical protein, conserved                            | -0,8316 | 1,201E-10  |
| TcCLB.510687.149 | coatomer alpha subunit, putative                           | -0,8319 | 6,231E-16  |
| TcCLB.511731.60  | glutamyl-tRNA synthetase, putative                         | -0,8328 | 6,937E-18  |
| TcCLB.509767.110 | hypothetical protein, conserved                            | -0,8328 | 5,259E-10  |
| TcCLB.510187.160 | developmentally regulated GTP-binding protein, putative    | -0,8338 | 9,923E-25  |
| TcCLB.506321.160 | syntaxin binding protein (pseudogene), putative            | -0,8339 | 0,00007399 |
| TcCLB.510297.30  | TPR-repeat-containing chaperone protein DNAJ, putative     | -0,8341 | 9,453E-18  |
| TcCLB.506137.27  | mucin-associated surface protein (MASP, pseudogene), pu    | -0,8342 | 0,01342    |
| TcCLB.511803.60  | hypothetical protein, conserved                            | -0,8344 | 6,449E-07  |
| TcCLB.511717.180 | hypothetical protein, conserved                            | -0,8347 | 1,505E-11  |
| TcCLB.509345.30  | trans-sialidase (pseudogene), putative                     | -0,8348 | 3,042E-10  |
| TcCLB.511301.30  | hypothetical protein, conserved                            | -0,8348 | 1,417E-06  |
| TcCLB.508943.10  | hypothetical protein, conserved                            | -0,8353 | 1,811E-08  |
| TcCLB.507007.77  | hypothetical protein, conserved                            | -0,8356 | 0,0003127  |
| TcCLB.506211.250 | fibrillar, putative                                        | -0,8362 | 5,419E-12  |
| TcCLB.509331.134 | trypanothione synthetase, putative                         | -0,8365 | 8,955E-08  |
| TcCLB.510371.110 | mucin TcMUCII, putative                                    | -0,8369 | 0,1039     |
| TcCLB.510215.10  | NADH-dependent fumarate reductase, putative                | -0,8372 | 7,737E-11  |

|                  |                                                               |         |           |
|------------------|---------------------------------------------------------------|---------|-----------|
| TcCLB.511255.110 | trans-sialidase (pseudogene), putative                        | -0,8381 | 0,0165    |
| TcCLB.510603.140 | hypothetical protein                                          | -0,8382 | 2,549E-21 |
| TcCLB.508873.360 | retrotransposon hot spot protein (RHS, pseudogene), putative  | -0,8382 | 0,001317  |
| TcCLB.506859.150 | hypothetical protein                                          | -0,8385 | 4,319E-22 |
| TcCLB.510329.250 | hypothetical protein, conserved                               | -0,8385 | 3,161E-07 |
| TcCLB.510361.209 | mucin-associated surface protein (MASP, pseudogene), putative | -0,8386 | 0,02879   |
| TcCLB.506009.80  | DNA repair and transcription factor protein, putative         | -0,8391 | 1,136E-10 |
| TcCLB.511611.16  | mucin TcMUCII (pseudogene), putative                          | -0,8395 | 0,1144    |
| TcCLB.509633.20  | hypothetical protein, conserved                               | -0,84   | 8,078E-15 |
| TcCLB.509901.90  | hypothetical protein, conserved (pseudogene)                  | -0,8402 | 7,35E-25  |
| TcCLB.511589.200 | S-adenosylhomocysteine hydrolase, putative                    | -0,8406 | 1,047E-14 |
| TcCLB.503959.40  | hypothetical protein                                          | -0,8407 | 6,038E-12 |
| TcCLB.505025.147 | hypothetical protein                                          | -0,8407 | 0,003697  |
| TcCLB.509123.20  | hypothetical protein                                          | -0,841  | 0,1177    |
| TcCLB.506537.71  | hypothetical protein, conserved (pseudogene)                  | -0,8414 | 1,979E-11 |
| TcCLB.421621.20  | syntaxin binding protein (pseudogene), putative               | -0,8416 | 0,007738  |
| TcCLB.504241.90  | dispersed gene family protein 1 (DGF-1), putative             | -0,8424 | 0,08943   |
| TcCLB.511367.10  | hypothetical protein                                          | -0,8425 | 0,09517   |
| TcCLB.511061.40  | trans-sialidase, Group V, putative                            | -0,8432 | 0,006693  |
| TcCLB.511717.209 | phosphatidylinositol 3-related kinase, putative (fragment)    | -0,8435 | 0,008857  |
| TcCLB.511277.250 | hypothetical protein, conserved                               | -0,8437 | 4,123E-24 |
| TcCLB.510463.221 | hypothetical protein, conserved (pseudogene)                  | -0,8439 | 0,1606    |
| TcCLB.506967.140 | mucin-associated surface protein (MASP, pseudogene), putative | -0,8441 | 0,09035   |
| TcCLB.509031.3   | trans-sialidase, putative (fragment)                          | -0,8442 | 0,01872   |
| TcCLB.510477.70  | mucin TcMUCII, putative                                       | -0,8446 | 0,04796   |
| TcCLB.510429.50  | Lsm12 protein, putative                                       | -0,845  | 1,125E-11 |
| TcCLB.505555.10  | lysosomal/endosomal membrane protein p67 (pseudogene)         | -0,8453 | 8,249E-22 |
| TcCLB.462761.10  | surface protease GP63, putative                               | -0,8459 | 9,008E-10 |
| TcCLB.510491.80  | hypothetical protein, conserved                               | -0,8461 | 2,22E-13  |
| TcCLB.506941.120 | hypothetical protein, conserved                               | -0,8462 | 1,508E-11 |
| TcCLB.510449.10  | dispersed gene family protein 1 (DGF-1), putative             | -0,8468 | 9,377E-06 |
| TcCLB.509205.100 | surface protease GP63, putative                               | -0,8473 | 9,268E-07 |
| TcCLB.506229.60  | hypothetical protein, conserved                               | -0,848  | 7,756E-13 |
| TcCLB.511277.190 | ras-related GTP-binding protein, putative                     | -0,8491 | 1,381E-12 |
| TcCLB.511477.25  | hypothetical protein, conserved (pseudogene)                  | -0,8495 | 0,000364  |
| TcCLB.508771.20  | cysteine peptidase, Clan CA, family C51, putative             | -0,8497 | 1,533E-17 |
| TcCLB.508909.140 | hypothetical protein, conserved                               | -0,8503 | 2,065E-11 |
| TcCLB.511633.40  | dynein light chain, putative                                  | -0,8504 | 6,6E-08   |
| TcCLB.510623.45  | surface protease GP63 (pseudogene), putative                  | -0,8506 | 0,006064  |
| TcCLB.508231.74  | poly(A)-specific ribonuclease PARN, putative                  | -0,8509 | 7,323E-09 |
| TcCLB.505965.10  | surface protease GP63, putative                               | -0,8509 | 0,02104   |
| TcCLB.509951.49  | DNA-directed RNA polymerase II subunit 2, putative            | -0,8515 | 9,3E-14   |
| TcCLB.509065.90  | hypothetical protein, conserved                               | -0,8517 | 2,024E-19 |
| TcCLB.505943.79  | retrotransposon hot spot protein (RHS, pseudogene), putative  | -0,8517 | 0,07721   |
| TcCLB.511173.370 | trans-sialidase, Group VI, putative                           | -0,8519 | 0,009286  |

|                  |                                                               |         |           |
|------------------|---------------------------------------------------------------|---------|-----------|
| TcCLB.507953.10  | trans-sialidase, Group V, putative                            | -0,8519 | 0,1215    |
| TcCLB.509715.104 | protein kinase, putative                                      | -0,8523 | 1,235E-14 |
| TcCLB.509163.60  | hypothetical protein, conserved                               | -0,8528 | 2,834E-11 |
| TcCLB.509167.80  | hypothetical protein, conserved                               | -0,8529 | 1,57E-17  |
| TcCLB.508773.9   | dispersed gene family protein 1 (DGF-1), putative             | -0,853  | 0,1144    |
| TcCLB.508543.100 | hypothetical protein, conserved                               | -0,8531 | 1,506E-24 |
| TcCLB.509105.120 | protein kinase, putative                                      | -0,8534 | 6,435E-11 |
| TcCLB.510329.170 | hypothetical protein, conserved                               | -0,8535 | 8,95E-22  |
| TcCLB.507019.120 | hypothetical protein, conserved                               | -0,8541 | 1,23E-09  |
| TcCLB.504839.70  | hypothetical protein, conserved                               | -0,8542 | 2,414E-24 |
| TcCLB.508667.40  | hypothetical protein, conserved                               | -0,8547 | 9,983E-18 |
| TcCLB.503865.20  | hypothetical protein, conserved                               | -0,8557 | 2,59E-19  |
| TcCLB.504247.79  | transmembrane protein, conserved (fragment)                   | -0,8562 | 1,104E-08 |
| TcCLB.507255.63  | UDP-Gal or UDP-GlcNAc-dependent glycosyltransferase, putative | -0,8563 | 0,005672  |
| TcCLB.506447.10  | hypothetical protein                                          | -0,8566 | 7,067E-08 |
| TcCLB.506009.30  | TPR-repeat-containing chaperone protein DNAJ, putative        | -0,8579 | 2,802E-15 |
| TcCLB.509795.50  | hypothetical protein, conserved                               | -0,8581 | 1,079E-22 |
| TcCLB.506321.150 | surface protease GP63 (pseudogene), putative                  | -0,8585 | 0,02149   |
| TcCLB.509051.30  | dTDP-glucose 4,6-dehydratase, putative                        | -0,859  | 1,141E-13 |
| TcCLB.508667.9   | hypothetical protein, conserved                               | -0,859  | 0,001155  |
| TcCLB.508851.40  | Octanoyltransferase, putative                                 | -0,8592 | 0,0002063 |
| TcCLB.511597.25  | hypothetical protein                                          | -0,8592 | 0,105     |
| TcCLB.506743.130 | protein tyrosine phosphatase-like protein, putative           | -0,8593 | 0,0003342 |
| TcCLB.511855.40  | hypothetical protein, conserved                               | -0,86   | 3,455E-11 |
| TcCLB.509741.40  | hypothetical protein, conserved                               | -0,86   | 8,567E-08 |
| TcCLB.504153.270 | hypothetical protein, conserved                               | -0,8601 | 1,867E-23 |
| TcCLB.508103.30  | trans-sialidase, Group V, putative                            | -0,8602 | 0,06688   |
| TcCLB.509767.170 | hypothetical protein, conserved                               | -0,8604 | 1,062E-26 |
| TcCLB.507723.70  | hypothetical protein, conserved (pseudogene)                  | -0,8607 | 4,294E-25 |
| TcCLB.510031.60  | methionyl-tRNA formyltransferase, putative                    | -0,8607 | 7,986E-14 |
| TcCLB.508707.224 | tubulin binding cofactor A-like protein, putative             | -0,861  | 1,787E-07 |
| TcCLB.509569.80  | hypothetical protein                                          | -0,8616 | 1,547E-10 |
| TcCLB.506925.340 | hypothetical protein, conserved                               | -0,8618 | 2,377E-10 |
| TcCLB.508727.9   | CCR4-NOT transcription complex subunit 10, putative           | -0,8629 | 5,697E-19 |
| TcCLB.507723.189 | bloodstream- specific protein 2 precursor (fragment)          | -0,8632 | 6,345E-12 |
| TcCLB.507641.14  | neurobeachin/beige protein, putative                          | -0,8635 | 7,059E-21 |
| TcCLB.508261.140 | elongation factor 1-gamma (EF-1-gamma), putative              | -0,8638 | 0,04659   |
| TcCLB.506245.80  | hypothetical protein, conserved (pseudogene)                  | -0,8641 | 0,0008625 |
| TcCLB.506875.10  | mucin TcMUCII (pseudogene), putative                          | -0,8646 | 0,0718    |
| TcCLB.510657.200 | surface protease GP63, putative                               | -0,8648 | 3,771E-07 |
| TcCLB.511273.50  | hypothetical protein, conserved                               | -0,8651 | 2,463E-13 |
| TcCLB.427237.9   | dispersed gene family protein 1 (DGF-1), putative             | -0,8654 | 0,04564   |
| TcCLB.510627.110 | mucin-associated surface protein (MASP), putative             | -0,8658 | 0,3469    |
| TcCLB.503971.40  | translation initiation factor 2 subunit, putative             | -0,8661 | 2,283E-09 |
| TcCLB.511757.10  | hypothetical protein, conserved                               | -0,8664 | 7,822E-23 |

|                  |                                                           |         |            |
|------------------|-----------------------------------------------------------|---------|------------|
| TcCLB.510431.130 | hypothetical protein, conserved                           | -0,8668 | 1,142E-10  |
| TcCLB.507821.101 | hypothetical protein, conserved (pseudogene)              | -0,8668 | 0,00001503 |
| TcCLB.506321.90  | syntaxin binding protein (pseudogene), putative           | -0,8668 | 0,00045    |
| TcCLB.508427.40  | mucin-associated surface protein (MASP), putative         | -0,8677 | 0,0003235  |
| TcCLB.509545.25  | elongation factor 1-gamma (EF-1-gamma, pseudogene), p     | -0,8677 | 0,1985     |
| TcCLB.507817.9   | histone H3, putative                                      | -0,8682 | 4,138E-06  |
| TcCLB.509965.210 | hypothetical protein, conserved                           | -0,8687 | 0,003688   |
| TcCLB.510465.10  | dispersed gene family protein 1 (DGF-1), putative         | -0,8687 | 0,04526    |
| TcCLB.507007.9   | hypothetical protein, conserved (pseudogene)              | -0,8691 | 2,229E-18  |
| TcCLB.506727.140 | hypothetical protein, conserved                           | -0,8702 | 1,376E-09  |
| TcCLB.511205.10  | surface protease GP63 (pseudogene), putative              | -0,8704 | 1,46E-08   |
| TcCLB.509979.261 | surface protease GP63 (pseudogene), putative              | -0,8704 | 0,0004424  |
| TcCLB.503973.31  | hypothetical protein, conserved (pseudogene)              | -0,8714 | 0,00008498 |
| TcCLB.504057.160 | hypothetical protein, conserved                           | -0,8722 | 3,763E-10  |
| TcCLB.507195.40  | trans-sialidase (pseudogene), putative                    | -0,8722 | 0,04013    |
| TcCLB.511323.40  | histone H2A, putative                                     | -0,8734 | 4,704E-08  |
| TcCLB.505555.30  | hypothetical protein, conserved                           | -0,8738 | 1,193E-26  |
| TcCLB.506501.329 | mucin-associated surface protein (MASP, pseudogene), pu   | -0,8741 | 0,07007    |
| TcCLB.509719.9   | N-acetyltransferase complex ARD1 subunit, putative (fragr | -0,8746 | 0,0007207  |
| TcCLB.506739.160 | hypothetical protein, conserved                           | -0,8748 | 8,554E-16  |
| TcCLB.510625.210 | trans-sialidase (pseudogene), putative                    | -0,8749 | 0,02593    |
| TcCLB.506193.60  | ascorbate peroxidase, putative (APX)                      | -0,8751 | 1,723E-07  |
| TcCLB.507753.6   | hypothetical protein, conserved (pseudogene)              | -0,8751 | 0,0001673  |
| TcCLB.511875.20  | trans-sialidase, Group VII, putative                      | -0,8754 | 2,831E-08  |
| TcCLB.511183.315 | hypothetical protein, conserved (pseudogene)              | -0,8762 | 0,04026    |
| TcCLB.506909.131 | elongation factor 1-gamma (EF-1-gamma, pseudogene), p     | -0,8774 | 0,0659     |
| TcCLB.506167.50  | clathrin heavy chain, putative                            | -0,8776 | 3,801E-38  |
| TcCLB.507875.10  | hypothetical protein, conserved                           | -0,8776 | 3,542E-14  |
| TcCLB.503529.10  | hypothetical protein, conserved (fragment)                | -0,8777 | 0,06114    |
| TcCLB.508273.80  | syntaxin binding protein, putative                        | -0,878  | 0,0008286  |
| TcCLB.506739.60  | hypothetical protein, conserved                           | -0,8783 | 3,221E-15  |
| TcCLB.509163.54  | zinc finger protein, putative                             | -0,8784 | 0,1668     |
| TcCLB.508153.210 | hypothetical protein, conserved                           | -0,8797 | 2,572E-07  |
| TcCLB.508365.180 | hypothetical protein                                      | -0,8798 | 0,1499     |
| TcCLB.506443.10  | hypothetical protein                                      | -0,8802 | 5,367E-13  |
| TcCLB.508645.4   | hypothetical protein, conserved                           | -0,8803 | 0,0001184  |
| TcCLB.511215.70  | kinesin, putative                                         | -0,8826 | 9,394E-13  |
| TcCLB.510003.30  | phosphatidylinositol 4-kinase alpha, putative             | -0,883  | 7,4E-25    |
| TcCLB.510057.4   | hypothetical protein, conserved                           | -0,8831 | 3,085E-09  |
| TcCLB.506509.40  | hypothetical protein, conserved                           | -0,8836 | 3,788E-09  |
| TcCLB.508469.4   | hypothetical protein, conserved (fragment)                | -0,8843 | 1,106E-12  |
| TcCLB.509069.30  | tubulin binding cofactor A-like protein, putative         | -0,8844 | 1,364E-07  |
| TcCLB.510239.30  | hypothetical protein, conserved (pseudogene)              | -0,8844 | 0,001326   |
| TcCLB.506251.70  | trans-sialidase (pseudogene), putative                    | -0,8846 | 0,2772     |
| TcCLB.506693.30  | RNA-binding protein 6, putative                           | -0,8854 | 0,05537    |

|                  |                                                           |         |            |
|------------------|-----------------------------------------------------------|---------|------------|
| TcCLB.507509.10  | hypothetical protein, conserved (pseudogene)              | -0,8858 | 0,00000012 |
| TcCLB.507817.18  | histone H3, putative                                      | -0,8859 | 1,017E-08  |
| TcCLB.508809.30  | ABC transporter family-like protein                       | -0,8865 | 2,992E-17  |
| TcCLB.511873.41  | hypothetical protein, conserved (pseudogene)              | -0,8866 | 0,01362    |
| TcCLB.511859.60  | subtilisin peptidase                                      | -0,8868 | 2,13E-13   |
| TcCLB.506693.10  | hypothetical protein                                      | -0,8873 | 1,355E-10  |
| TcCLB.506739.110 | hypothetical protein                                      | -0,8877 | 2,755E-12  |
| TcCLB.510625.225 | hypothetical protein, conserved (pseudogene)              | -0,8878 | 0,00524    |
| TcCLB.421621.11  | hypothetical protein, conserved (pseudogene)              | -0,888  | 0,102      |
| TcCLB.510823.109 | hypothetical protein, conserved                           | -0,8881 | 4,647E-08  |
| TcCLB.508243.81  | syntaxin binding protein (pseudogene), putative           | -0,8881 | 0,004218   |
| TcCLB.510807.50  | mucin-associated surface protein (MASP), putative         | -0,8883 | 0,03325    |
| TcCLB.510293.70  | ribonuclease H, putative                                  | -0,8886 | 4,929E-08  |
| TcCLB.510751.40  | Importin 1 (fragment) (IMP1)                              | -0,8891 | 1,351E-23  |
| TcCLB.507379.9   | dispersed gene family protein 1 (DGF-1), putative (fragme | -0,8909 | 0,000239   |
| TcCLB.508851.31  | N-acetyltransferase complex ARD1 subunit (pseudogene),    | -0,8913 | 0,0008645  |
| TcCLB.511055.50  | protein kinase, putative                                  | -0,8914 | 0,0006311  |
| TcCLB.507241.20  | hypothetical protein, conserved                           | -0,8919 | 2,558E-19  |
| TcCLB.509085.31  | trans-sialidase (pseudogene), putative                    | -0,892  | 0,0006963  |
| TcCLB.507245.40  | dispersed gene family protein 1 (DGF-1), putative         | -0,8926 | 2,418E-08  |
| TcCLB.508147.45  | hypothetical protein, conserved (pseudogene)              | -0,8935 | 0,003378   |
| TcCLB.510021.190 | hypothetical protein                                      | -0,8939 | 0,2387     |
| TcCLB.510257.10  | hypothetical protein, conserved                           | -0,8947 | 2,008E-34  |
| TcCLB.511711.30  | eRF1 methyltransferase catalytic subunit, putative        | -0,8948 | 6,823E-11  |
| TcCLB.510749.4   | ubiquitin-protein ligase, putative                        | -0,8948 | 0,1088     |
| TcCLB.507771.85  | hypothetical protein                                      | -0,8949 | 4,499E-07  |
| TcCLB.511079.80  | mucin TcMUCII, putative                                   | -0,8957 | 0,1874     |
| TcCLB.504153.90  | Cytoplasmic dynein 2 heavy chain (DYNC2H1), putative      | -0,8961 | 1,235E-50  |
| TcCLB.506733.140 | hypothetical protein, conserved                           | -0,8964 | 2,271E-17  |
| TcCLB.509085.40  | retrotransposon hot spot protein (RHS, pseudogene), putat | -0,8964 | 0,003677   |
| TcCLB.503887.20  | hypothetical protein                                      | -0,8974 | 2,044E-08  |
| TcCLB.503847.40  | hypothetical protein, conserved                           | -0,8975 | 1,034E-14  |
| TcCLB.510443.30  | hypothetical protein, conserved                           | -0,8989 | 2,058E-17  |
| TcCLB.505037.70  | trans-sialidase (pseudogene), putative                    | -0,8991 | 2,79E-08   |
| TcCLB.510773.60  | hypothetical protein                                      | -0,8992 | 0,001465   |
| TcCLB.511261.10  | hypothetical protein, conserved                           | -0,8999 | 1,908E-27  |
| TcCLB.506737.50  | hypothetical protein, conserved                           | -0,9009 | 4,718E-11  |
| TcCLB.511367.40  | hypothetical protein                                      | -0,9014 | 0,009038   |
| TcCLB.505025.144 | hypothetical protein, conserved                           | -0,9017 | 0,08522    |
| TcCLB.508153.640 | IAG-nucleoside hydrolase, putative (IAGNH)                | -0,9024 | 8,626E-29  |
| TcCLB.508215.9   | protein kinase C substrate protein, heavy chain, putative | -0,9025 | 7,518E-23  |
| TcCLB.506899.10  | trans-sialidase, putative                                 | -0,9028 | 0,08272    |
| TcCLB.510903.30  | helicase-like protein, putative                           | -0,9029 | 1,611E-15  |
| TcCLB.510899.10  | surface protease GP63, putative                           | -0,9032 | 2,573E-16  |
| TcCLB.507787.110 | hypothetical protein, conserved                           | -0,9038 | 2,572E-08  |

|                  |                                                           |         |            |
|------------------|-----------------------------------------------------------|---------|------------|
| TcCLB.510419.11  | mucin-associated surface protein (MASP, pseudogene), pu   | -0,9045 | 0,2019     |
| TcCLB.511549.20  | trans-sialidase (pseudogene), putative                    | -0,905  | 0,0002679  |
| TcCLB.399389.10  | hypothetical protein, conserved                           | -0,9054 | 1,085E-29  |
| TcCLB.510057.30  | hypothetical protein, conserved                           | -0,9061 | 6,893E-13  |
| TcCLB.509915.35  | hypothetical protein, conserved (pseudogene)              | -0,9064 | 5,594E-06  |
| TcCLB.511299.10  | Triglyceride lipase, putative (fragment)                  | -0,9067 | 0,0005755  |
| TcCLB.511861.100 | mucin-associated surface protein (MASP, pseudogene), pu   | -0,9072 | 1,833E-06  |
| TcCLB.506251.100 | poly(A)-specific ribonuclease PARN, putative              | -0,9077 | 3,308E-14  |
| TcCLB.508837.110 | hypothetical protein, conserved                           | -0,908  | 8,85E-13   |
| TcCLB.511287.64  | hypothetical protein, conserved                           | -0,908  | 5,828E-08  |
| TcCLB.511821.70  | hypothetical protein, conserved                           | -0,9091 | 1,627E-12  |
| TcCLB.506797.40  | hypothetical protein, conserved                           | -0,9091 | 0,0002147  |
| TcCLB.503913.4   | nucleolar RNA binding protein (pseudogene), putative      | -0,9096 | 6,712E-11  |
| TcCLB.504153.310 | heat shock protein, putative                              | -0,9099 | 1,729E-49  |
| TcCLB.506619.90  | ABC transporter family-like protein                       | -0,9117 | 3,954E-12  |
| TcCLB.510933.190 | mucin TcMUCII, putative                                   | -0,9139 | 0,02097    |
| TcCLB.510635.40  | hypothetical protein, conserved                           | -0,914  | 2,149E-12  |
| TcCLB.507145.84  | mucin-associated surface protein (MASP, pseudogene), pu   | -0,914  | 0,00003725 |
| TcCLB.508873.170 | retrotransposon hot spot protein (RHS, pseudogene), putat | -0,914  | 0,005816   |
| TcCLB.511311.70  | hypothetical protein, conserved                           | -0,9144 | 4,405E-22  |
| TcCLB.506213.110 | hypothetical protein                                      | -0,9147 | 1,018E-23  |
| TcCLB.511635.30  | ARP2/3 complex 16kDa subunit, putative                    | -0,9154 | 3,83E-09   |
| TcCLB.508727.60  | hypothetical protein, conserved                           | -0,9157 | 5,662E-15  |
| TcCLB.459389.10  | hypothetical protein, conserved (fragment)                | -0,9162 | 7,443E-11  |
| TcCLB.504005.3   | RNA helicase, putative                                    | -0,9163 | 2,499E-15  |
| TcCLB.510307.245 | elongation factor 1-gamma (EF-1-gamma, pseudogene), p     | -0,9169 | 0,02213    |
| TcCLB.511255.660 | mucin TcMUCII, putative                                   | -0,9176 | 0,01523    |
| TcCLB.506229.40  | leucine-rich repeat protein, putative                     | -0,9179 | 0,0001065  |
| TcCLB.508835.30  | trans-sialidase (pseudogene), putative                    | -0,9182 | 2,549E-07  |
| TcCLB.506499.200 | hypothetical protein                                      | -0,9182 | 0,01189    |
| TcCLB.506223.120 | phosphatidylinositol 3-related kinase, putative           | -0,92   | 5,311E-31  |
| TcCLB.508873.210 | mucin-associated surface protein (MASP), putative         | -0,9204 | 0,005909   |
| TcCLB.509099.100 | hypothetical protein, conserved                           | -0,9207 | 2,132E-11  |
| TcCLB.510329.130 | UDP-glucose:glycoprotein glucosyltransferase (tcgt1)      | -0,9217 | 2,383E-20  |
| TcCLB.509011.80  | surface protease GP63, putative                           | -0,9225 | 8,351E-07  |
| TcCLB.508855.10  | trans-sialidase, putative                                 | -0,9228 | 1,227E-08  |
| TcCLB.503893.100 | hypothetical protein, conserved                           | -0,9229 | 0,00001947 |
| TcCLB.506457.80  | hypothetical protein, conserved                           | -0,9241 | 2,596E-15  |
| TcCLB.511451.110 | hypothetical protein, conserved (pseudogene)              | -0,9252 | 0,01769    |
| TcCLB.506599.390 | mucin-associated surface protein (MASP), putative         | -0,9265 | 0,01831    |
| TcCLB.504787.30  | mucin-associated surface protein (MASP), putative         | -0,9269 | 0,06465    |
| TcCLB.506925.310 | hypothetical protein, conserved                           | -0,9271 | 2,489E-53  |
| TcCLB.507077.60  | surface protease GP63, putative                           | -0,9275 | 2,018E-10  |
| TcCLB.421621.50  | mucin-associated surface protein (MASP), putative         | -0,9276 | 0,07688    |
| TcCLB.508707.200 | nucleoside diphosphate kinase (NDPK1)                     | -0,9289 | 2,762E-25  |

|                  |                                                           |         |            |
|------------------|-----------------------------------------------------------|---------|------------|
| TcCLB.504081.26  | hypothetical protein                                      | -0,9296 | 0,0001582  |
| TcCLB.510297.80  | DNA repair and transcription factor protein, putative     | -0,9298 | 7,393E-13  |
| TcCLB.511717.40  | hypothetical protein, conserved                           | -0,9301 | 2,314E-08  |
| TcCLB.507359.30  | hypothetical protein, conserved (pseudogene)              | -0,9319 | 0,101      |
| TcCLB.505387.9   | dispersed gene family protein 1 (DGF-1), putative (fragme | -0,933  | 2,036E-09  |
| TcCLB.511239.110 | hypothetical protein, conserved                           | -0,9335 | 2,434E-22  |
| TcCLB.511127.230 | hypothetical protein, conserved                           | -0,9338 | 4,887E-11  |
| TcCLB.510021.109 | mucin-associated surface protein (MASP, pseudogene), pu   | -0,9341 | 0,0001773  |
| TcCLB.506901.85  | mucin-associated surface protein (MASP, pseudogene), pu   | -0,9341 | 0,07144    |
| TcCLB.508355.360 | hypothetical protein, conserved                           | -0,9342 | 4,622E-08  |
| TcCLB.506095.9   | dispersed gene family protein 1 (DGF-1), putative (fragme | -0,9346 | 2,614E-10  |
| TcCLB.506625.110 | DNA topoisomerase type IB small subunit, putative         | -0,9347 | 2,324E-13  |
| TcCLB.511277.39  | hypothetical protein, conserved                           | -0,9348 | 0,00004272 |
| TcCLB.505949.110 | hypothetical protein, conserved (pseudogene)              | -0,9352 | 0,03861    |
| TcCLB.504245.9   | hypothetical protein, conserved                           | -0,9354 | 6,581E-14  |
| TcCLB.506349.10  | protein kinase, putative                                  | -0,9357 | 0,02168    |
| TcCLB.510953.10  | surface protease GP63 (pseudogene), putative              | -0,936  | 0,0006846  |
| TcCLB.507677.50  | hypothetical protein, conserved                           | -0,9362 | 5,696E-13  |
| TcCLB.508723.80  | disgorgin, putative                                       | -0,9362 | 9,848E-12  |
| TcCLB.507143.60  | hypothetical protein                                      | -0,9367 | 0,1025     |
| TcCLB.480997.10  | hypothetical protein, conserved                           | -0,937  | 0,104      |
| TcCLB.511479.48  | hypothetical protein, conserved (fragment)                | -0,9372 | 0,0004292  |
| TcCLB.511417.70  | histone-lysine N-methyltransferase, putative (DOT1B)      | -0,9378 | 4,696E-22  |
| TcCLB.505101.50  | GMP synthetase (pseudogene), putative                     | -0,9379 | 6,249E-06  |
| TcCLB.510779.20  | hypothetical protein (fragment)                           | -0,9382 | 5,692E-06  |
| TcCLB.506733.20  | AMP deaminase, putative                                   | -0,9389 | 4,466E-28  |
| TcCLB.504011.30  | surface protease GP63 (pseudogene), putative              | -0,9397 | 0,01009    |
| TcCLB.511859.10  | AMP deaminase, putative                                   | -0,9398 | 0,00002133 |
| TcCLB.506343.41  | trans-sialidase (pseudogene), putative                    | -0,9403 | 0,0007081  |
| TcCLB.510329.340 | hypothetical protein, conserved                           | -0,9408 | 2,332E-14  |
| TcCLB.508877.10  | trans-sialidase (pseudogene), putative                    | -0,9408 | 0,0005693  |
| TcCLB.511277.470 | hypothetical protein, conserved                           | -0,9413 | 3,222E-07  |
| TcCLB.506739.130 | protein phosphatase 1 catalitic subunit, putative         | -0,9423 | 1,204E-18  |
| TcCLB.508369.20  | squalene synthase, putative                               | -0,9429 | 5,589E-47  |
| TcCLB.426761.10  | retrotransposon hot spot protein (RHS, pseudogene), putat | -0,9433 | 0,0507     |
| TcCLB.506445.90  | magnesium and cobalt transport protein, putative          | -0,9442 | 9,28E-16   |
| TcCLB.509671.90  | COP-coated vesicle membrane protein gp25L precursor, pu   | -0,9449 | 6,033E-16  |
| TcCLB.508879.4   | protein kinase C substrate protein, heavy chain, putative | -0,9451 | 2,05E-12   |
| TcCLB.510657.170 | cytochrome P450 reductase, putative                       | -0,9455 | 5,013E-11  |
| TcCLB.504797.80  | endo-beta-N-acetylglucosaminidase, putative               | -0,9458 | 9,002E-27  |
| TcCLB.506229.70  | ATP-dependent DEAD/H RNA helicase, putative               | -0,9458 | 2,809E-11  |
| TcCLB.509565.9   | hypothetical protein (fragment)                           | -0,9465 | 5,878E-34  |
| TcCLB.506739.120 | hypothetical protein, conserved                           | -0,9466 | 4,989E-17  |
| TcCLB.510903.60  | prenyltransferase, putative                               | -0,9466 | 3,7E-13    |
| TcCLB.508523.35  | hypothetical protein, conserved (pseudogene)              | -0,9472 | 1,116E-13  |

|                  |                                                           |         |            |
|------------------|-----------------------------------------------------------|---------|------------|
| TcCLB.510255.29  | hypothetical protein, conserved (fragment)                | -0,9473 | 1,334E-09  |
| TcCLB.510047.80  | trans-sialidase, Group V, putative                        | -0,9475 | 0,0005483  |
| TcCLB.503467.9   | NADH-dependent fumarate reductase, putative (fragment)    | -0,948  | 2,225E-08  |
| TcCLB.511719.10  | phosphatidylinositol 3-related kinase, putative           | -0,9487 | 6,422E-30  |
| TcCLB.506319.70  | hypothetical protein                                      | -0,9495 | 0,02713    |
| TcCLB.507053.200 | hypothetical protein, conserved                           | -0,9498 | 2,551E-16  |
| TcCLB.510825.30  | phospholipase B-like, putative (p67)                      | -0,9512 | 2,028E-41  |
| TcCLB.511271.10  | dispersed gene family protein 1 (DGF-1, pseudogene), puta | -0,9516 | 6,451E-06  |
| TcCLB.509599.20  | hypothetical protein, conserved (fragment)                | -0,952  | 3,336E-15  |
| TcCLB.510681.9   | surface protease GP63, putative                           | -0,9526 | 0,007438   |
| TcCLB.506155.130 | hypothetical protein, conserved                           | -0,9533 | 0,0004146  |
| TcCLB.511183.505 | trans-sialidase (pseudogene), putative                    | -0,9534 | 0,005813   |
| TcCLB.503579.110 | pseudouridylate synthase I, putative                      | -0,9538 | 3,312E-12  |
| TcCLB.509451.24  | hypothetical protein, conserved (fragment)                | -0,954  | 4,303E-18  |
| TcCLB.511183.300 | trans-sialidase (pseudogene), putative                    | -0,954  | 0,03514    |
| TcCLB.506959.20  | hypothetical protein, conserved                           | -0,9553 | 2,421E-32  |
| TcCLB.510441.10  | hypothetical protein                                      | -0,9556 | 0,0001683  |
| TcCLB.510439.40  | hypothetical protein                                      | -0,956  | 1,866E-10  |
| TcCLB.507257.80  | diacylglycerol kinase-like protein, putative              | -0,9569 | 2,085E-08  |
| TcCLB.510747.60  | cytochrome P450 reductase, putative                       | -0,9574 | 9,951E-15  |
| TcCLB.508121.15  | hypothetical protein, conserved (pseudogene)              | -0,9586 | 4,452E-07  |
| TcCLB.503755.30  | DNA polymerase kappa, putative                            | -0,9609 | 0,00001591 |
| TcCLB.509875.60  | hypothetical protein                                      | -0,963  | 0,01353    |
| TcCLB.509011.100 | myosin heavy chain kinase A, putative                     | -0,9632 | 6,509E-17  |
| TcCLB.511727.190 | hypothetical protein, conserved                           | -0,9639 | 9,939E-29  |
| TcCLB.507601.40  | Nudix hydrolase 2, putative (Nudix2)                      | -0,9641 | 4,163E-13  |
| TcCLB.508889.4   | 5-oxoprolinase, putative                                  | -0,9657 | 0,0001565  |
| TcCLB.509485.30  | hypothetical protein, conserved (pseudogene)              | -0,9672 | 0,02148    |
| TcCLB.504277.30  | hypothetical protein                                      | -0,9693 | 0,00006138 |
| TcCLB.508365.240 | mucin TcMUCII, putative                                   | -0,9697 | 0,09306    |
| TcCLB.508153.690 | hypothetical protein                                      | -0,9705 | 0,08462    |
| TcCLB.510017.15  | surface protease GP63 (pseudogene), putative              | -0,9731 | 0,02573    |
| TcCLB.507531.19  | phosphatidylinositol 4-kinase alpha, putative             | -0,9732 | 3,29E-21   |
| TcCLB.507681.30  | hypothetical protein, conserved                           | -0,9736 | 2,2E-28    |
| TcCLB.508357.100 | hypothetical protein, conserved                           | -0,974  | 2,861E-34  |
| TcCLB.503431.109 | nucleoporin interacting component (NUP93), putative       | -0,9745 | 0,00004765 |
| TcCLB.511605.20  | mucin-associated surface protein (MASP), putative         | -0,9748 | 0,0019     |
| TcCLB.511511.5   | hypothetical protein                                      | -0,9748 | 0,001984   |
| TcCLB.511631.9   | hypothetical protein, conserved (fragment)                | -0,9753 | 8,899E-08  |
| TcCLB.447847.10  | trans-sialidase (pseudogene), putative                    | -0,976  | 0,03237    |
| TcCLB.506247.230 | prolyl endopeptidase (POP)                                | -0,9762 | 2,06E-30   |
| TcCLB.503641.19  | peroxin 12, putative (PEX12)                              | -0,9765 | 1,049E-07  |
| TcCLB.510201.45  | hypothetical protein, conserved (pseudogene)              | -0,9784 | 6,337E-07  |
| TcCLB.511127.60  | kinesin, putative                                         | -0,9794 | 3,265E-25  |
| TcCLB.510329.290 | diacylglycerol kinase-like protein, putative              | -0,9797 | 7,751E-08  |



|                  |                                                           |         |           |
|------------------|-----------------------------------------------------------|---------|-----------|
| TcCLB.506071.9   | dispersed gene family protein 1 (DGF-1), putative (fragme | -0,9799 | 0,0003338 |
| TcCLB.503895.19  | hypothetical protein                                      | -0,9801 | 1,461E-32 |
| TcCLB.506591.4   | heat shock protein 90, putative (LPG3)                    | -0,9812 | 4,848E-22 |
| TcCLB.508221.590 | trans-sialidase, Group V, putative                        | -0,9813 | 0,007563  |
| TcCLB.510399.10  | dispersed gene family protein 1 (DGF-1), putative         | -0,9815 | 0,05114   |
| TcCLB.511211.49  | hypothetical protein, conserved                           | -0,9817 | 2,169E-16 |
| TcCLB.510359.520 | mucin-associated surface protein (MASP), putative         | -0,9819 | 0,4451    |
| TcCLB.508149.60  | trans-sialidase (pseudogene), putative                    | -0,9834 | 0,001041  |
| TcCLB.511735.70  | hypothetical protein, conserved                           | -0,9838 | 5,591E-16 |
| TcCLB.510191.40  | trans-sialidase (pseudogene), putative                    | -0,9845 | 0,0253    |
| TcCLB.506585.60  | hypothetical protein, conserved                           | -0,9853 | 8,921E-15 |
| TcCLB.511623.20  | hypothetical protein, conserved                           | -0,9858 | 7,385E-11 |
| TcCLB.508355.431 | chaperonin containing t-complex protein, putative (fragme | -0,9865 | 0,008682  |
| TcCLB.509053.70  | p22 protein precursor, putative                           | -0,9878 | 5,706E-18 |
| TcCLB.508357.40  | cysteine peptidase, Clan CA, family C19, putative         | -0,988  | 2,886E-11 |
| TcCLB.511837.100 | amino acid permease-like protein, putative                | -0,9898 | 8,444E-19 |
| TcCLB.506251.130 | ubiquitin-protein ligase (pseudogene), putative           | -0,9902 | 1,587E-22 |
| TcCLB.506725.20  | hypothetical protein, conserved                           | -0,9906 | 2,278E-46 |
| TcCLB.507533.10  | phosphatidylinositol 4-kinase alpha, putative             | -0,9909 | 2,107E-21 |
| TcCLB.504021.100 | hypothetical protein, conserved                           | -0,9909 | 1,123E-17 |
| TcCLB.479481.5   | elongation factor 1-gamma (EF-1-gamma, pseudogene), p     | -0,9911 | 0,02106   |
| TcCLB.506511.70  | hypothetical protein, conserved                           | -0,992  | 2,3E-18   |
| TcCLB.506871.60  | hypothetical protein, conserved (pseudogene)              | -0,9926 | 9,485E-16 |
| TcCLB.507143.40  | hypothetical protein, conserved                           | -0,994  | 1,772E-34 |
| TcCLB.506301.11  | heat shock protein, putative (fragment)                   | -0,9944 | 6,05E-30  |
| TcCLB.508323.190 | serine/threonine protein phosphatase, putative            | -0,9944 | 1,078E-12 |
| TcCLB.506559.380 | centrin, putative                                         | -0,9955 | 2,454E-18 |
| TcCLB.506177.50  | hypothetical protein, conserved                           | -0,9956 | 8,8E-38   |
| TcCLB.511483.50  | hypothetical protein, conserved                           | -0,9981 | 2,099E-08 |
| TcCLB.507895.150 | hypothetical protein, conserved                           | -0,9982 | 8,184E-12 |
| TcCLB.509073.70  | phosphatidate cytidyltransferase-like protein, putative   | -0,9988 | 1,73E-16  |
| TcCLB.510187.394 | hypothetical protein, conserved                           | -0,9993 | 2,097E-16 |
| TcCLB.508209.120 | 10 kDa heat shock protein, putative                       | -0,9999 | 0,001003  |
| TcCLB.510743.20  | hypothetical protein, conserved                           | -1      | 9,289E-11 |
| TcCLB.506965.170 | trans-sialidase, Group V, putative                        | -1      | 0,0003021 |
| TcCLB.509563.60  | hypothetical protein                                      | -1,001  | 1,169E-07 |
| TcCLB.511621.170 | hypothetical protein, conserved                           | -1,001  | 1,589E-07 |
| TcCLB.510475.51  | mucin-associated surface protein (MASP, pseudogene), pu   | -1,001  | 0,04518   |
| TcCLB.508873.50  | hypothetical protein                                      | -1,003  | 0,06031   |
| TcCLB.506229.64  | hypothetical protein, conserved                           | -1,004  | 6,297E-09 |
| TcCLB.508481.30  | trans-sialidase (pseudogene), putative                    | -1,004  | 0,013     |
| TcCLB.503875.30  | mucin-associated surface protein (MASP), putative         | -1,005  | 9,801E-07 |
| TcCLB.508737.150 | mitochondrial carrier protein, putative                   | -1,007  | 1,332E-33 |
| TcCLB.506755.90  | hypothetical protein, conserved                           | -1,007  | 1,396E-11 |
| TcCLB.510275.150 | hypothetical protein, conserved (pseudogene)              | -1,007  | 0,0002391 |

|                  |                                                               |        |            |
|------------------|---------------------------------------------------------------|--------|------------|
| TcCLB.509943.30  | ribosomal protein S6, putative                                | -1,008 | 2,444E-14  |
| TcCLB.509567.40  | nuclear transport factor 2, putative                          | -1,009 | 1,26E-16   |
| TcCLB.511079.100 | mucin-associated surface protein (MASP), putative (fragm      | -1,009 | 0,2089     |
| TcCLB.510187.480 | phosphomannomutase, putative                                  | -1,01  | 4,954E-25  |
| TcCLB.507711.110 | procyclic form surface phosphoprotein, putative               | -1,01  | 2,556E-13  |
| TcCLB.506499.60  | hypothetical protein                                          | -1,01  | 0,08526    |
| TcCLB.506839.70  | NADH dehydrogenase, putative                                  | -1,013 | 5,927E-36  |
| TcCLB.507747.10  | surface protease GP63, putative                               | -1,013 | 0,00002254 |
| TcCLB.507447.19  | microtubule-associated protein, putative (fragment)           | -1,014 | 0,0211     |
| TcCLB.511627.110 | heat shock protein DNAJ, putative                             | -1,015 | 2,526E-62  |
| TcCLB.510013.13  | syntaxin binding protein (pseudogene), putative               | -1,016 | 0,01355    |
| TcCLB.510667.10  | hypothetical protein, conserved                               | -1,017 | 7,307E-13  |
| TcCLB.503811.10  | heat shock protein 90, putative (LPG3)                        | -1,018 | 1,854E-28  |
| TcCLB.507895.100 | hypothetical protein, conserved (pseudogene)                  | -1,018 | 6,111E-15  |
| TcCLB.508181.40  | choline/ethanolamine phosphotransferase, putative             | -1,019 | 2,072E-20  |
| TcCLB.447801.10  | hypothetical protein, conserved (fragment)                    | -1,019 | 2,262E-09  |
| TcCLB.508291.71  | hypothetical protein                                          | -1,02  | 4,327E-06  |
| TcCLB.507607.10  | surface protease GP63 (pseudogene), putative                  | -1,021 | 0,07639    |
| TcCLB.508111.40  | hypothetical protein, conserved                               | -1,023 | 2,705E-31  |
| TcCLB.506477.60  | protein kinase, putative                                      | -1,023 | 8,2E-24    |
| TcCLB.506763.330 | mucin-associated surface protein (MASP), putative             | -1,024 | 0,004454   |
| TcCLB.510461.25  | elongation factor 1-gamma (EF-1-gamma, pseudogene), p         | -1,024 | 0,04106    |
| TcCLB.506053.35  | hypothetical protein, conserved (pseudogene)                  | -1,025 | 1,473E-13  |
| TcCLB.506457.90  | hypothetical protein                                          | -1,025 | 2,383E-12  |
| TcCLB.509369.20  | retrotransposon hot spot protein (RHS, pseudogene), putat     | -1,025 | 0,009141   |
| TcCLB.509097.36  | surface protease GP63 (pseudogene), putative                  | -1,025 | 0,1236     |
| TcCLB.511415.21  | trans-sialidase (pseudogene), putative                        | -1,026 | 0,00002515 |
| TcCLB.463269.10  | eukaryotic translation initiation factor 1A, putative (fragme | -1,026 | 0,0005031  |
| TcCLB.510013.40  | mucin-associated surface protein (MASP), putative             | -1,026 | 0,007258   |
| TcCLB.509437.30  | hypothetical protein, conserved                               | -1,027 | 5,96E-42   |
| TcCLB.506671.61  | hypothetical protein, conserved (pseudogene)                  | -1,027 | 2,464E-06  |
| TcCLB.508145.30  | RNA-binding protein, putative                                 | -1,028 | 0,001886   |
| TcCLB.508169.30  | hypothetical protein, conserved                               | -1,029 | 5,469E-14  |
| TcCLB.510877.80  | phospholipid-transporting ATPase-like protein, putative       | -1,03  | 8,348E-37  |
| TcCLB.508327.10  | mucin-associated surface protein (MASP), putative             | -1,03  | 0,07476    |
| TcCLB.503463.20  | hypothetical protein, conserved                               | -1,031 | 1,962E-19  |
| TcCLB.509233.220 | hypothetical protein, conserved                               | -1,033 | 4,911E-28  |
| TcCLB.505481.10  | hypothetical protein                                          | -1,033 | 0,0002648  |
| TcCLB.510359.40  | hypothetical protein, conserved                               | -1,034 | 7,505E-06  |
| TcCLB.511179.60  | hypothetical protein, conserved                               | -1,034 | 0,004289   |
| TcCLB.510547.46  | hypothetical protein, conserved (pseudogene)                  | -1,035 | 0,0538     |
| TcCLB.510769.80  | ankyrin repeat protein, putative                              | -1,036 | 6,86E-31   |
| TcCLB.511491.170 | quiescin sulphydryl oxidase, putative (QSOX)                  | -1,036 | 3,265E-25  |
| TcCLB.510105.120 | protein kinase, putative                                      | -1,036 | 1,502E-16  |
| TcCLB.509505.10  | protein disulfide isomerase, putative                         | -1,037 | 2,238E-18  |

|                  |                                                           |        |            |
|------------------|-----------------------------------------------------------|--------|------------|
| TcCLB.507237.260 | mucin TcMUCII, putative                                   | -1,038 | 0,04958    |
| TcCLB.506501.150 | surface protease GP63 (pseudogene), putative              | -1,039 | 0,06015    |
| TcCLB.511529.170 | enoyl-CoA hydratase/isomerase family protein, putative    | -1,04  | 2,009E-08  |
| TcCLB.506739.90  | ATP-dependent RNA helicase, putative                      | -1,041 | 6,856E-37  |
| TcCLB.508173.129 | hypothetical protein, conserved                           | -1,042 | 3,427E-25  |
| TcCLB.506713.30  | ATP-dependent DEAD/H RNA helicase, putative               | -1,042 | 9,89E-25   |
| TcCLB.506747.10  | orotidine-5-phosphate decarboxylase/orotate phosphoribo:  | -1,044 | 1,663E-07  |
| TcCLB.510607.51  | retrotransposon hot spot protein (RHS, pseudogene), putat | -1,044 | 0,004317   |
| TcCLB.508655.10  | DNA-directed RNA polymerase II subunit 2 (pseudogene), p  | -1,044 | 0,01333    |
| TcCLB.509605.20  | hypothetical protein, conserved                           | -1,045 | 1,733E-29  |
| TcCLB.507021.60  | p1/s1 nuclease, putative                                  | -1,046 | 7,101E-23  |
| TcCLB.410275.18  | trans-sialidase (pseudogene), putative                    | -1,046 | 0,05437    |
| TcCLB.508757.10  | trans-sialidase (pseudogene), putative                    | -1,046 | 0,1765     |
| TcCLB.506459.130 | mucin-associated surface protein (MASP), putative         | -1,047 | 0,005114   |
| TcCLB.510187.404 | dolichyl-P-Man:GDP-Man5GlcNAc2-PP-dolichyl alpha-1,3-n    | -1,048 | 3,863E-19  |
| TcCLB.398009.20  | trans-sialidase (pseudogene), putative                    | -1,048 | 3,023E-14  |
| TcCLB.506857.120 | hypothetical protein, conserved                           | -1,048 | 0,03084    |
| TcCLB.511219.10  | dispersed gene family protein 1 (DGF-1), putative         | -1,049 | 0,02203    |
| TcCLB.507801.130 | heat shock protein DnaJ (pseudogene), putative            | -1,05  | 4,756E-49  |
| TcCLB.510197.5   | hypothetical protein, conserved (pseudogene)              | -1,05  | 0,00001392 |
| TcCLB.506133.30  | surface protease GP63 (pseudogene), putative              | -1,05  | 0,03314    |
| TcCLB.510061.60  | dispersed gene family protein 1 (DGF-1), putative         | -1,05  | 0,0688     |
| TcCLB.507467.70  | diacylglycerol acyltransferase, putative                  | -1,051 | 1,073E-26  |
| TcCLB.511413.11  | hypothetical protein, conserved (pseudogene)              | -1,051 | 1,897E-14  |
| TcCLB.509097.10  | hypothetical protein                                      | -1,053 | 0,06702    |
| TcCLB.506503.80  | kinesin, putative                                         | -1,054 | 3,76E-28   |
| TcCLB.510339.54  | hypothetical protein, conserved                           | -1,054 | 9,065E-27  |
| TcCLB.508221.381 | mucin-associated surface protein (MASP, pseudogene), pu   | -1,055 | 0,07379    |
| TcCLB.443899.10  | trans-sialidase, putative (fragment)                      | -1,055 | 0,1902     |
| TcCLB.508961.70  | hypothetical protein, conserved                           | -1,056 | 2,236E-19  |
| TcCLB.511753.20  | class I nuclease-like protein, putative                   | -1,056 | 9,015E-15  |
| TcCLB.509085.136 | trans-sialidase (pseudogene), putative                    | -1,056 | 0,005621   |
| TcCLB.511577.104 | hypothetical protein, conserved                           | -1,057 | 3,834E-09  |
| TcCLB.509007.40  | hypothetical protein, conserved                           | -1,057 | 0,125      |
| TcCLB.511439.70  | hypothetical protein, conserved                           | -1,058 | 3,336E-22  |
| TcCLB.510721.21  | hypothetical protein                                      | -1,058 | 0,004886   |
| TcCLB.511063.61  | hypothetical protein, conserved (pseudogene)              | -1,058 | 0,007544   |
| TcCLB.510701.31  | hypothetical protein                                      | -1,058 | 0,05567    |
| TcCLB.506989.190 | heat shock protein 90, putative (LPG3)                    | -1,059 | 4,578E-44  |
| TcCLB.506241.124 | ankyrin repeat protein, putative                          | -1,059 | 3,071E-37  |
| TcCLB.510251.10  | amino acid permease-like protein, putative                | -1,06  | 3,379E-26  |
| TcCLB.509647.170 | hypothetical protein, conserved                           | -1,061 | 7,956E-32  |
| TcCLB.510701.50  | mucin TcMUC (pseudogene), putative                        | -1,061 | 0,005677   |
| TcCLB.510497.170 | trans-sialidase (pseudogene), putative                    | -1,061 | 0,03804    |
| TcCLB.511375.10  | hypothetical protein (pseudogene)                         | -1,061 | 0,1031     |

|                  |                                                            |        |            |
|------------------|------------------------------------------------------------|--------|------------|
| TcCLB.511301.70  | FK506-binding protein (FKBP)-type peptidyl-prolyl isomera: | -1,062 | 1,532E-33  |
| TcCLB.510329.20  | hypothetical protein, conserved                            | -1,062 | 1,091E-16  |
| TcCLB.504197.10  | hypothetical protein                                       | -1,063 | 0,03289    |
| TcCLB.510487.30  | hypothetical protein, conserved (pseudogene)               | -1,065 | 2,605E-09  |
| TcCLB.510971.10  | dispersed gene family protein 1 (DGF-1), putative          | -1,065 | 1,334E-07  |
| TcCLB.509527.120 | trans-sialidase, Group V, putative                         | -1,065 | 0,00004373 |
| TcCLB.506509.10  | hypothetical protein, conserved                            | -1,067 | 4,553E-16  |
| TcCLB.510773.30  | hypothetical protein                                       | -1,068 | 0,001233   |
| TcCLB.510211.10  | trans-sialidase (pseudogene), putative                     | -1,068 | 0,1004     |
| TcCLB.508719.30  | hypothetical protein, conserved                            | -1,07  | 2,068E-42  |
| TcCLB.504089.70  | hypothetical protein, conserved                            | -1,071 | 3,713E-15  |
| TcCLB.507831.60  | heat shock protein 110, putative                           | -1,072 | 3,529E-50  |
| TcCLB.511875.123 | hypothetical protein, conserved (pseudogene)               | -1,072 | 0,02909    |
| TcCLB.508209.140 | protein disulfide isomerase, putative                      | -1,073 | 2,359E-50  |
| TcCLB.506469.130 | SNARE domain-containing protein, putative                  | -1,073 | 2,373E-14  |
| TcCLB.511025.60  | hypothetical protein                                       | -1,075 | 1,237E-12  |
| TcCLB.506211.240 | hypothetical protein, conserved                            | -1,078 | 2,111E-33  |
| TcCLB.507979.4   | histone H2A, putative                                      | -1,079 | 3,091E-07  |
| TcCLB.509657.11  | hypothetical protein, conserved (pseudogene)               | -1,079 | 7,684E-06  |
| TcCLB.503799.4   | protein kinase, putative (fragment)                        | -1,082 | 8,57E-11   |
| TcCLB.509753.10  | hypothetical protein, conserved (pseudogene)               | -1,082 | 0,003703   |
| TcCLB.506567.80  | hypothetical protein                                       | -1,084 | 1,218E-16  |
| TcCLB.508913.39  | O-sialoglycoprotein endopeptidase, putative                | -1,084 | 6,772E-09  |
| TcCLB.508221.400 | trans-sialidase, Group V, putative                         | -1,084 | 0,002948   |
| TcCLB.506605.120 | hypothetical protein, conserved                            | -1,085 | 4,798E-30  |
| TcCLB.506679.280 | endonuclease/exonuclease/phosphatase, putative             | -1,087 | 3,171E-15  |
| TcCLB.509525.340 | hypothetical protein                                       | -1,087 | 0,01712    |
| TcCLB.510501.40  | trans-sialidase, putative                                  | -1,088 | 0,02268    |
| TcCLB.506885.400 | 40 kDa cyclophilin, putative (CYP40)                       | -1,089 | 2,299E-25  |
| TcCLB.508221.130 | mucin TcMUCII (pseudogene), putative                       | -1,089 | 0,005966   |
| TcCLB.509075.50  | trans-sialidase, Group II, putative                        | -1,09  | 2,825E-07  |
| TcCLB.508153.180 | aspartyl aminopeptidase, putative                          | -1,091 | 4,57E-41   |
| TcCLB.511751.140 | hypothetical protein                                       | -1,092 | 2,619E-13  |
| TcCLB.503479.40  | hypothetical protein, conserved                            | -1,093 | 9,878E-37  |
| TcCLB.506191.39  | dispersed gene family protein 1 (DGF-1), putative          | -1,094 | 1,282E-11  |
| TcCLB.430281.20  | hypothetical protein (fragment)                            | -1,095 | 0,00914    |
| TcCLB.508209.144 | hypothetical protein, conserved                            | -1,096 | 1,382E-14  |
| TcCLB.511183.600 | mucin-associated surface protein (MASP, pseudogene), pu    | -1,096 | 5,907E-07  |
| TcCLB.509663.10  | myosin heavy chain, putative                               | -1,097 | 4,892E-31  |
| TcCLB.510031.70  | heat shock protein Hsp20, putative                         | -1,097 | 5,285E-14  |
| TcCLB.503417.20  | hypothetical protein                                       | -1,097 | 0,00468    |
| TcCLB.511185.150 | hypothetical protein, conserved (pseudogene)               | -1,099 | 1,037E-14  |
| TcCLB.504155.250 | trans-sialidase (pseudogene), putative                     | -1,099 | 0,007279   |
| TcCLB.506855.190 | hypothetical protein, conserved                            | -1,103 | 1,561E-29  |
| TcCLB.506257.5   | aminopeptidase, putative (fragment)                        | -1,103 | 2,17E-10   |

|                  |                                                           |        |            |
|------------------|-----------------------------------------------------------|--------|------------|
| TcCLB.508865.2   | hypothetical protein, conserved (fragment)                | -1,105 | 0,004991   |
| TcCLB.508099.50  | trans-sialidase, putative                                 | -1,105 | 0,1659     |
| TcCLB.506793.40  | UDP-glucuronic acid/UDP-N-acetylgalactosamine transpor    | -1,106 | 3,166E-18  |
| TcCLB.506111.20  | dispersed gene family protein 1 (DGF-1), putative         | -1,106 | 5,822E-13  |
| TcCLB.511367.330 | hypothetical protein, conserved                           | -1,106 | 2,801E-12  |
| TcCLB.507163.75  | hypothetical protein                                      | -1,107 | 0,0244     |
| TcCLB.511233.170 | elongation factor 1-gamma (EF-1-gamma, pseudogene), p     | -1,108 | 0,02213    |
| TcCLB.509213.40  | hypothetical protein, conserved                           | -1,109 | 3,728E-46  |
| TcCLB.507765.20  | PUF nine target 1                                         | -1,109 | 2,121E-40  |
| TcCLB.510021.100 | mucin TcMUCII, putative                                   | -1,109 | 0,001516   |
| TcCLB.503531.10  | hypothetical protein, conserved                           | -1,111 | 0,0003254  |
| TcCLB.506229.10  | Mitogen-activated protein kinase 10, putative (MPK10)     | -1,111 | 1,471E-12  |
| TcCLB.508933.50  | hypothetical protein, conserved                           | -1,112 | 1,761E-18  |
| TcCLB.507633.80  | trans-sialidase, Group V, putative                        | -1,112 | 0,0001895  |
| TcCLB.506719.10  | phosphatidylinositol (3,5) kinase, putative               | -1,114 | 4,766E-19  |
| TcCLB.508189.31  | hypothetical protein, conserved (pseudogene)              | -1,114 | 0,0003047  |
| TcCLB.510419.20  | trans-sialidase, Group VI, putative                       | -1,115 | 0,0005092  |
| TcCLB.510363.250 | trans-sialidase, Group V, putative                        | -1,115 | 0,002372   |
| TcCLB.510479.40  | trans-sialidase, putative (fragment)                      | -1,117 | 0,006046   |
| TcCLB.508101.9   | trans-sialidase, putative (fragment)                      | -1,119 | 0,003491   |
| TcCLB.503989.20  | hypothetical protein, conserved                           | -1,112 | 5,356E-19  |
| TcCLB.504241.34  | dispersed gene family protein 1 (DGF-1), putative (fragme | -1,121 | 1,688E-07  |
| TcCLB.509233.120 | hypothetical protein, conserved                           | -1,122 | 6,567E-50  |
| TcCLB.510735.60  | hypothetical protein, conserved                           | -1,122 | 4,164E-13  |
| TcCLB.507641.260 | chaperonin HSP60, mitochondrial precursor (pseudogene)    | -1,123 | 5,885E-19  |
| TcCLB.511203.29  | surface protease GP63, putative (fragment)                | -1,123 | 2,51E-08   |
| TcCLB.506859.4   | N-acetyltransferase, putative (fragment)                  | -1,123 | 0,00001337 |
| TcCLB.509469.10  | dispersed gene family protein 1 (DGF-1, pseudogene), puta | -1,123 | 0,00002269 |
| TcCLB.457113.10  | trans-sialidase, putative (fragment)                      | -1,123 | 0,244      |
| TcCLB.503867.5   | hypothetical protein, conserved                           | -1,125 | 0,00001508 |
| TcCLB.510365.10  | trans-sialidase (pseudogene), putative                    | -1,125 | 0,01211    |
| TcCLB.508245.21  | surface protease GP63 (pseudogene), putative              | -1,125 | 0,05581    |
| TcCLB.506953.45  | ascorbate-dependent peroxidase (pseudogene), putative     | -1,126 | 4,018E-09  |
| TcCLB.503733.50  | hypothetical protein, conserved (pseudogene)              | -1,127 | 6,875E-15  |
| TcCLB.510817.60  | hypothetical protein, conserved                           | -1,128 | 2,94E-47   |
| TcCLB.511237.130 | trans-sialidase, putative (fragment)                      | -1,128 | 6,482E-07  |
| TcCLB.508251.21  | hypothetical protein, conserved (pseudogene)              | -1,113 | 9,161E-06  |
| TcCLB.503533.40  | mucin-associated surface protein (MASP), putative         | -1,113 | 0,01287    |
| TcCLB.511385.40  | hypothetical protein                                      | -1,131 | 1,074E-07  |
| TcCLB.506483.10  | Triglyceride lipase, putative                             | -1,132 | 3,958E-15  |
| TcCLB.507641.60  | aldehyde dehydrogenase, putative                          | -1,133 | 1,404E-36  |
| TcCLB.503849.80  | NADH-dependent fumarate reductase, putative               | -1,137 | 1,544E-10  |
| TcCLB.504533.10  | dispersed gene family protein 1 (DGF-1), putative         | -1,138 | 3,705E-09  |
| TcCLB.506459.200 | hypothetical protein                                      | -1,139 | 0,01011    |
| TcCLB.504147.280 | trypanothione synthetase-like protein, putative           | -1,114 | 1,448E-41  |

|                  |                                                            |        |            |
|------------------|------------------------------------------------------------|--------|------------|
| TcCLB.507057.60  | hypothetical protein, conserved                            | -1,14  | 5,548E-13  |
| TcCLB.439653.10  | NADH-dependent fumarate reductase, putative                | -1,14  | 0,00001422 |
| TcCLB.510531.109 | dynein heavy chain, cytosolic, putative (fragment)         | -1,143 | 3,053E-13  |
| TcCLB.510279.263 | trans-sialidase (pseudogene), putative                     | -1,143 | 0,0003173  |
| TcCLB.507957.334 | mucin-associated surface protein (MASP), putative          | -1,145 | 0,2392     |
| TcCLB.509085.90  | retrotransposon hot spot protein (RHS, pseudogene), putat  | -1,148 | 2,96E-07   |
| TcCLB.510819.100 | mitochondrial carrier protein, putative                    | -1,149 | 3,489E-21  |
| TcCLB.506683.10  | hypothetical protein, conserved (pseudogene)               | -1,15  | 0,0138     |
| TcCLB.510713.11  | hypothetical protein, conserved (pseudogene)               | -1,153 | 0,00000418 |
| TcCLB.504069.140 | trans-sialidase (pseudogene), putative                     | -1,154 | 9,604E-12  |
| TcCLB.508731.9   | hypothetical protein, conserved (fragment)                 | -1,155 | 1,408E-20  |
| TcCLB.508373.29  | orotidine-5-phosphate decarboxylase/orotate phosphoribo:   | -1,155 | 6,772E-20  |
| TcCLB.507993.150 | hypothetical protein, conserved                            | -1,156 | 3,858E-36  |
| TcCLB.506229.30  | hypothetical protein                                       | -1,159 | 8,286E-23  |
| TcCLB.506501.350 | mucin-associated surface protein (MASP), putative          | -1,159 | 0,008178   |
| TcCLB.506251.30  | hypothetical protein, conserved                            | -1,16  | 5,976E-39  |
| TcCLB.506699.40  | katanin-like protein, putative                             | -1,161 | 1,639E-15  |
| TcCLB.507611.190 | retrotransposon hot spot protein (RHS, pseudogene), putat  | -1,161 | 0,00000103 |
| TcCLB.510363.220 | mucin-associated surface protein (MASP), putative          | -1,161 | 0,004734   |
| TcCLB.503875.10  | mucin-associated surface protein (MASP), putative          | -1,161 | 0,02257    |
| TcCLB.511667.90  | hypothetical protein, conserved (pseudogene)               | -1,164 | 3,426E-12  |
| TcCLB.498829.21  | hypothetical protein                                       | -1,166 | 0,01451    |
| TcCLB.510629.120 | dispersed gene family protein 1 (DGF-1, pseudogene), puta  | -1,168 | 0,009522   |
| TcCLB.510187.551 | chaperonin HSP60, mitochondrial precursor, putative (fragr | -1,171 | 4,715E-24  |
| TcCLB.511627.70  | hypothetical protein, conserved                            | -1,172 | 1,508E-18  |
| TcCLB.506263.49  | hypothetical protein, conserved (fragment)                 | -1,173 | 9,529E-16  |
| TcCLB.503809.158 | Triglyceride lipase, putative (fragment)                   | -1,173 | 1,429E-06  |
| TcCLB.506171.60  | trans-sialidase, Group II, putative                        | -1,179 | 0,00006106 |
| TcCLB.503919.60  | hypothetical protein, conserved                            | -1,181 | 4,933E-21  |
| TcCLB.507065.127 | mucin-associated surface protein (MASP, pseudogene), pu    | -1,181 | 9,163E-08  |
| TcCLB.508221.660 | mucin-associated surface protein (MASP), putative          | -1,181 | 0,005736   |
| TcCLB.506579.50  | hypothetical protein, conserved                            | -1,183 | 1,165E-29  |
| TcCLB.511365.90  | hypothetical protein, conserved                            | -1,183 | 3,619E-24  |
| TcCLB.399373.20  | dispersed gene family protein 1 (DGF-1), putative          | -1,184 | 2,374E-06  |
| TcCLB.507729.20  | hypothetical protein, conserved (pseudogene)               | -1,185 | 4,442E-08  |
| TcCLB.508265.80  | hypothetical protein                                       | -1,186 | 5,451E-25  |
| TcCLB.511127.10  | RNA-binding protein 5, putative                            | -1,187 | 0,1076     |
| TcCLB.503463.10  | protein kinase C substrate protein, heavy chain, putative  | -1,188 | 3,53E-21   |
| TcCLB.503539.30  | GTP-binding nuclear protein rtb2, putative                 | -1,189 | 8,81E-62   |
| TcCLB.506501.290 | mucin-associated surface protein (MASP), putative          | -1,194 | 0,00003675 |
| TcCLB.505965.30  | prenyltransferase, putative                                | -1,195 | 7,105E-20  |
| TcCLB.509663.60  | retrotransposon hot spot protein (RHS, pseudogene), putat  | -1,195 | 4,165E-17  |
| TcCLB.511487.130 | trans-sialidase (pseudogene), putative                     | -1,196 | 9,283E-07  |
| TcCLB.506239.60  | hypothetical protein, conserved                            | -1,197 | 2,136E-15  |
| TcCLB.503695.10  | retrotransposon hot spot protein (RHS, pseudogene), putat  | -1,198 | 7,494E-06  |

|                  |                                                           |        |           |
|------------------|-----------------------------------------------------------|--------|-----------|
| TcCLB.504929.5   | zinc finger CCCH domain containing protein 11 (ZC3H11)    | -1,198 | 0,02118   |
| TcCLB.511575.70  | kinetoplastid kinetochore protein 4, putative             | -1,199 | 2,825E-25 |
| TcCLB.511467.30  | hypothetical protein, conserved                           | -1,2   | 1,996E-19 |
| TcCLB.511263.9   | heat shock protein 110, putative (fragment)               | -1,202 | 3,393E-57 |
| TcCLB.511215.90  | hypothetical protein, conserved                           | -1,205 | 0,0000402 |
| TcCLB.511723.10  | surface protease GP63, putative                           | -1,206 | 7,049E-16 |
| TcCLB.508313.140 | mucin-associated surface protein (MASP), putative         | -1,206 | 0,00995   |
| TcCLB.508645.70  | nucleoside transporter 1, putative                        | -1,207 | 5,478E-17 |
| TcCLB.508159.26  | hypothetical protein, conserved (pseudogene)              | -1,209 | 1,595E-07 |
| TcCLB.510629.80  | trans-sialidase (pseudogene), putative                    | -1,211 | 0,01192   |
| TcCLB.507061.49  | hypothetical protein                                      | -1,212 | 1,882E-21 |
| TcCLB.422207.10  | UDP-Gal or UDP-GlcNAc-dependent glycosyltransferase, p    | -1,212 | 0,121     |
| TcCLB.507859.80  | trans-sialidase (pseudogene), putative                    | -1,213 | 0,01883   |
| TcCLB.508323.70  | centrin-4, putative (Centrin4)                            | -1,219 | 6,092E-10 |
| TcCLB.506501.220 | mucin-associated surface protein (MASP), putative         | -1,219 | 0,001746  |
| TcCLB.508221.440 | trans-sialidase (pseudogene), putative                    | -1,22  | 0,0000302 |
| TcCLB.511277.590 | hypothetical protein, conserved                           | -1,221 | 8,466E-43 |
| TcCLB.509023.209 | hypothetical protein, conserved                           | -1,221 | 6,068E-34 |
| TcCLB.511751.160 | hypothetical protein, conserved                           | -1,221 | 1,597E-15 |
| TcCLB.508365.190 | trans-sialidase, Group VI, putative                       | -1,223 | 1,741E-06 |
| TcCLB.506835.90  | hypothetical protein, conserved                           | -1,224 | 1,315E-34 |
| TcCLB.511039.10  | kinetoplast DNA-associated protein, putative              | -1,224 | 4,706E-31 |
| TcCLB.509505.60  | hypothetical protein                                      | -1,225 | 3,733E-22 |
| TcCLB.508367.50  | hypothetical protein, conserved (pseudogene)              | -1,226 | 4,605E-07 |
| TcCLB.510217.10  | hypothetical protein                                      | -1,229 | 0,06443   |
| TcCLB.460061.20  | trans-sialidase, putative (fragment)                      | -1,229 | 0,09326   |
| TcCLB.503821.5   | hypothetical protein, conserved                           | -1,232 | 9,069E-09 |
| TcCLB.507641.280 | chaperonin HSP60, mitochondrial precursor (HSP60)         | -1,234 | 6,096E-26 |
| TcCLB.510197.30  | trans-sialidase, Group V, putative                        | -1,235 | 1,803E-07 |
| TcCLB.510627.200 | trans-sialidase (pseudogene), putative                    | -1,235 | 0,02944   |
| TcCLB.511237.10  | thimet oligopeptidase, putative                           | -1,236 | 4,975E-47 |
| TcCLB.506739.80  | mitochondrial carrier protein, putative                   | -1,236 | 2,356E-33 |
| TcCLB.503793.20  | phosphatidylinositol (3,5) kinase, putative (fragment)    | -1,236 | 2,037E-08 |
| TcCLB.504233.10  | surface protease GP63, putative                           | -1,237 | 7,186E-10 |
| TcCLB.506451.16  | hypothetical protein, conserved (pseudogene)              | -1,237 | 0,0002098 |
| TcCLB.503753.20  | hypothetical protein, conserved                           | -1,239 | 4,858E-20 |
| TcCLB.509521.84  | retrotransposon hot spot protein (RHS, pseudogene), putat | -1,24  | 7,225E-06 |
| TcCLB.505101.30  | hypothetical protein, conserved                           | -1,24  | 0,001761  |
| TcCLB.508943.4   | glycerol uptake protein, putative                         | -1,24  | 0,009053  |
| TcCLB.509553.40  | ribonuclease mar1, putative                               | -1,242 | 3,112E-16 |
| TcCLB.506613.141 | hypothetical protein, conserved (pseudogene)              | -1,244 | 7,953E-13 |
| TcCLB.504445.10  | dispersed gene family protein 1 (DGF-1), putative         | -1,244 | 4,535E-07 |
| TcCLB.510413.10  | hypothetical protein, conserved (pseudogene)              | -1,245 | 1,049E-10 |
| TcCLB.506667.90  | trans-sialidase, Group V, putative                        | -1,246 | 0,0001996 |
| TcCLB.510289.40  | GPI inositol deacylase precursor, putative                | -1,247 | 3,662E-27 |

|                  |                                                          |        |           |
|------------------|----------------------------------------------------------|--------|-----------|
| TcCLB.506501.401 | hypothetical protein, conserved (pseudogene)             | -1,247 | 0,06456   |
| TcCLB.506559.450 | hypothetical protein                                     | -1,249 | 4,307E-21 |
| TcCLB.503755.60  | surface protease GP63 (pseudogene), putative             | -1,25  | 0,0003604 |
| TcCLB.508737.20  | hypothetical protein                                     | -1,251 | 1,552E-16 |
| TcCLB.507733.40  | hypothetical protein, conserved (pseudogene)             | -1,251 | 0,000104  |
| TcCLB.509683.30  | hypothetical protein, conserved                          | -1,252 | 5,514E-34 |
| TcCLB.476911.10  | trans-sialidase, putative (fragment)                     | -1,252 | 0,02696   |
| TcCLB.508595.11  | hypothetical protein                                     | -1,253 | 0,03028   |
| TcCLB.508483.13  | trans-sialidase (pseudogene), putative                   | -1,254 | 0,0000664 |
| TcCLB.510797.4   | phosphatidylinositol (3,5) kinase, putative (fragment)   | -1,256 | 1,259E-16 |
| TcCLB.503825.10  | protein kinase (pseudogene), putative                    | -1,256 | 1,504E-14 |
| TcCLB.506965.60  | elongation factor 1-gamma (EF-1-gamma, pseudogene), p    | -1,256 | 0,01865   |
| TcCLB.511183.480 | hypothetical protein, conserved (pseudogene)             | -1,257 | 0,0007178 |
| TcCLB.425969.5   | hypothetical protein                                     | -1,259 | 1,891E-21 |
| TcCLB.508297.7   | trans-sialidase, putative (fragment)                     | -1,261 | 5,831E-08 |
| TcCLB.506945.40  | hypothetical protein, conserved                          | -1,264 | 2,669E-33 |
| TcCLB.506867.10  | endonuclease G, putative                                 | -1,264 | 7,334E-17 |
| TcCLB.506755.50  | hypothetical protein, conserved                          | -1,267 | 7,038E-24 |
| TcCLB.506667.50  | trans-sialidase (pseudogene), putative                   | -1,268 | 0,000136  |
| TcCLB.511517.95  | hypothetical protein, conserved                          | -1,269 | 8,415E-09 |
| TcCLB.509891.70  | hypothetical protein, conserved (pseudogene)             | -1,27  | 5,215E-29 |
| TcCLB.509791.120 | kinetoplast-associated protein (KAP6)                    | -1,271 | 1,391E-34 |
| TcCLB.510481.90  | hypothetical protein, conserved                          | -1,275 | 3,701E-06 |
| TcCLB.507237.250 | mucin-associated surface protein (MASP, pseudogene), pu  | -1,282 | 9,527E-09 |
| TcCLB.509499.20  | beta propeller protein, putative                         | -1,285 | 1,283E-35 |
| TcCLB.508277.280 | hypothetical protein                                     | -1,287 | 1,391E-19 |
| TcCLB.506211.150 | polyprenyl synthase, putative                            | -1,293 | 7,265E-28 |
| TcCLB.507011.30  | hypothetical protein, conserved                          | -1,294 | 3,181E-34 |
| TcCLB.510693.150 | mucin-associated surface protein (MASP), putative        | -1,296 | 0,1037    |
| TcCLB.405737.4   | RNA polymerase-associated protein CDC73, putative (fragr | -1,297 | 0,001052  |
| TcCLB.506251.50  | Cell division control protein 48, putative               | -1,3   | 1,914E-18 |
| TcCLB.509085.50  | trans-sialidase (pseudogene), putative                   | -1,302 | 1,634E-09 |
| TcCLB.503709.10  | hypothetical protein                                     | -1,305 | 0,00204   |
| TcCLB.507105.50  | hypothetical protein                                     | -1,306 | 1,883E-81 |
| TcCLB.510503.40  | surface protease GP63 (pseudogene), putative             | -1,306 | 0,001025  |
| TcCLB.510831.10  | mucin-associated surface protein (MASP, pseudogene), pu  | -1,308 | 0,005824  |
| TcCLB.507059.60  | orotidine-5-phosphate decarboxylase/orotate phosphoribo: | -1,309 | 1,448E-36 |
| TcCLB.505935.10  | hypothetical protein, conserved (pseudogene)             | -1,309 | 1,586E-07 |
| TcCLB.508163.371 | hypothetical protein, conserved (pseudogene)             | -1,309 | 3,212E-07 |
| TcCLB.510111.30  | hypothetical protein, conserved (pseudogene)             | -1,311 | 6,618E-21 |
| TcCLB.510627.179 | syntaxin binding protein 1 (pseudogene), putative        | -1,313 | 0,001851  |
| TcCLB.504427.10  | trypanothione synthetase, putative                       | -1,315 | 3,241E-15 |
| TcCLB.508461.330 | hypothetical protein                                     | -1,317 | 1,599E-28 |
| TcCLB.510197.95  | hypothetical protein, conserved (pseudogene)             | -1,317 | 4,241E-11 |
| TcCLB.509085.110 | trans-sialidase (pseudogene), putative                   | -1,317 | 4,262E-09 |



|                  |                                                             |        |           |
|------------------|-------------------------------------------------------------|--------|-----------|
| TcCLB.509553.20  | ATP-dependent chaperone, putative                           | -1,318 | 1,995E-22 |
| TcCLB.508835.10  | hypothetical protein, conserved (pseudogene)                | -1,318 | 3,882E-15 |
| TcCLB.508153.230 | hypothetical protein, conserved                             | -1,321 | 1,266E-42 |
| TcCLB.511561.20  | dispersed gene family protein 1 (DGF-1), putative           | -1,321 | 7,56E-17  |
| TcCLB.506445.110 | nucleobase transporter, putative                            | -1,325 | 1,964E-64 |
| TcCLB.507081.100 | hypothetical protein, conserved                             | -1,325 | 2,637E-20 |
| TcCLB.508183.4   | aspartyl aminopeptidase, putative (fragment)                | -1,327 | 1,924E-20 |
| TcCLB.508323.90  | hypothetical protein, conserved                             | -1,327 | 2,843E-12 |
| TcCLB.508219.50  | mucin TcMUCII, putative                                     | -1,329 | 0,004648  |
| TcCLB.510647.30  | tryptophanyl-tRNA synthetase, putative                      | -1,33  | 7,621E-44 |
| TcCLB.507641.104 | small GTPase, putative                                      | -1,33  | 5,351E-22 |
| TcCLB.508873.60  | trans-sialidase, Group V, putative                          | -1,331 | 0,0001149 |
| TcCLB.510279.320 | trans-sialidase, Group V, putative                          | -1,332 | 2,361E-07 |
| TcCLB.506501.270 | syntaxin binding protein (pseudogene), putative             | -1,334 | 0,01459   |
| TcCLB.511297.30  | hypothetical protein, conserved (fragment)                  | -1,338 | 1,559E-30 |
| TcCLB.506813.170 | hypothetical protein, conserved (pseudogene)                | -1,338 | 3,746E-10 |
| TcCLB.506929.54  | hypothetical protein                                        | -1,339 | 1,214E-11 |
| TcCLB.504035.21  | hypothetical protein                                        | -1,339 | 0,001254  |
| TcCLB.506459.195 | hypothetical protein, conserved                             | -1,34  | 0,0000921 |
| TcCLB.511553.45  | surface protease GP63 (pseudogene), putative                | -1,34  | 0,002845  |
| TcCLB.506881.10  | hypothetical protein, conserved (pseudogene)                | -1,343 | 2,602E-06 |
| TcCLB.509655.20  | hypothetical protein, conserved (pseudogene)                | -1,346 | 8,402E-09 |
| TcCLB.508209.90  | 10 kDa heat shock protein, putative                         | -1,347 | 0,001687  |
| TcCLB.509455.80  | GTP-binding nuclear protein rtb2, putative                  | -1,35  | 1,824E-47 |
| TcCLB.509899.110 | orotidine-5-phosphate decarboxylase/orotate phosphoribo:    | -1,351 | 4,021E-41 |
| TcCLB.507089.170 | hypothetical protein, conserved                             | -1,353 | 2,664E-39 |
| TcCLB.511481.55  | RNA-binding protein, putative                               | -1,364 | 2,133E-19 |
| TcCLB.510323.110 | hypothetical protein, conserved                             | -1,367 | 4,681E-12 |
| TcCLB.509011.40  | calreticulin, putative                                      | -1,373 | 5,86E-117 |
| TcCLB.510401.10  | dispersed gene family protein 1 (DGF-1), putative           | -1,375 | 0,0204    |
| TcCLB.505999.90  | phosphoglycerate kinase, putative                           | -1,38  | 2,013E-59 |
| TcCLB.510533.80  | hypothetical protein, conserved                             | -1,38  | 1,559E-22 |
| TcCLB.503991.10  | hypothetical protein, conserved                             | -1,38  | 9,186E-19 |
| TcCLB.510493.4   | hypothetical protein, conserved (fragment)                  | -1,382 | 4,006E-09 |
| TcCLB.506133.207 | mucin-associated surface protein (MASP, pseudogene), pu     | -1,385 | 0,0001541 |
| TcCLB.510363.196 | syntaxin binding protein (pseudogene), putative             | -1,387 | 0,005162  |
| TcCLB.507795.60  | tryptophanyl-tRNA synthetase (pseudogene), putative         | -1,39  | 1,073E-39 |
| TcCLB.506973.25  | hypothetical protein                                        | -1,39  | 1,241E-07 |
| TcCLB.509287.140 | dispersed gene family protein 1 (DGF-1), putative           | -1,393 | 1,654E-16 |
| TcCLB.508221.414 | elongation factor 1-gamma (EF-1-gamma), putative            | -1,394 | 0,0002341 |
| TcCLB.508175.90  | hypothetical protein                                        | -1,395 | 5,451E-77 |
| TcCLB.510629.101 | hypothetical protein, conserved (pseudogene)                | -1,395 | 0,01109   |
| TcCLB.503471.19  | expression site-associated gene (ESAG-like) protein, putati | -1,397 | 2,17E-18  |
| TcCLB.511167.100 | hypothetical protein, conserved                             | -1,404 | 1,793E-33 |
| TcCLB.510489.10  | hypothetical protein                                        | -1,417 | 1,769E-07 |

|                  |                                                                |        |            |
|------------------|----------------------------------------------------------------|--------|------------|
| TcCLB.507049.66  | hypothetical protein                                           | -1,421 | 6,894E-17  |
| TcCLB.504239.150 | hypothetical protein                                           | -1,421 | 0,04291    |
| TcCLB.507771.30  | hypothetical protein, conserved                                | -1,422 | 3,925E-30  |
| TcCLB.510291.14  | mitochondrial carrier protein, putative                        | -1,422 | 6,099E-27  |
| TcCLB.508149.40  | hypothetical protein, conserved (pseudogene)                   | -1,423 | 1,16E-08   |
| TcCLB.508369.40  | serine/threonine-protein kinase A (pseudogene), putative       | -1,432 | 1,804E-42  |
| TcCLB.433673.10  | trans-sialidase, putative (fragment)                           | -1,432 | 6,353E-33  |
| TcCLB.509369.40  | dispersed gene family protein 1 (DGF-1, pseudogene), putative  | -1,433 | 1,598E-08  |
| TcCLB.511529.59  | hypothetical protein                                           | -1,436 | 3,573E-26  |
| TcCLB.509793.50  | hypothetical protein, conserved                                | -1,437 | 6,26E-86   |
| TcCLB.507859.101 | hypothetical protein, conserved (pseudogene)                   | -1,45  | 0,0004901  |
| TcCLB.510711.10  | trans-sialidase (pseudogene), putative                         | -1,452 | 0,0002048  |
| TcCLB.503631.9   | hypothetical protein, conserved                                | -1,454 | 1,025E-30  |
| TcCLB.511385.50  | hypothetical protein                                           | -1,457 | 1,214E-18  |
| TcCLB.510329.70  | cdc2-related kinase 10, putative (CRK10)                       | -1,458 | 2,147E-22  |
| TcCLB.505479.10  | mucin-associated surface protein (MASP, pseudogene), putative  | -1,458 | 0,0007304  |
| TcCLB.507055.20  | hypothetical protein, conserved (fragment)                     | -1,459 | 3,77E-23   |
| TcCLB.507641.290 | chaperonin HSP60, mitochondrial precursor (HSP60)              | -1,46  | 0,00002417 |
| TcCLB.508395.9   | dispersed gene family protein 1 (DGF-1), putative (fragment)   | -1,467 | 9,627E-06  |
| TcCLB.508637.19  | hypothetical protein, conserved                                | -1,468 | 0,008348   |
| TcCLB.506501.230 | mucin TcMUCII, putative                                        | -1,468 | 0,009001   |
| TcCLB.504081.23  | hypothetical protein, conserved                                | -1,47  | 0,008005   |
| TcCLB.511575.120 | hypothetical protein, conserved                                | -1,473 | 2,359E-50  |
| TcCLB.511071.40  | amastin, putative                                              | -1,475 | 1,922E-31  |
| TcCLB.508433.80  | hypothetical protein                                           | -1,479 | 0,002097   |
| TcCLB.506765.49  | hypothetical protein                                           | -1,487 | 0,01375    |
| TcCLB.510537.40  | trans-sialidase (pseudogene), putative                         | -1,488 | 0,003349   |
| TcCLB.506599.300 | hypothetical protein                                           | -1,489 | 0,01629    |
| TcCLB.507041.120 | variant-surface-glycoprotein phospholipase C, putative         | -1,49  | 3,482E-30  |
| TcCLB.508919.110 | hypothetical protein, conserved                                | -1,492 | 1,908E-20  |
| TcCLB.507863.6   | hypothetical protein, conserved (pseudogene)                   | -1,492 | 0,006691   |
| TcCLB.467465.10  | surface protease GP63, putative                                | -1,495 | 0,0004864  |
| TcCLB.503887.79  | hypothetical protein, conserved                                | -1,496 | 7,442E-30  |
| TcCLB.510625.240 | cell-surface protein (cysteine-rich repeat motif) (pseudogene) | -1,502 | 0,001601   |
| TcCLB.507579.30  | surface protease GP63 (pseudogene), putative                   | -1,511 | 8,461E-08  |
| TcCLB.506851.30  | hypothetical protein, conserved                                | -1,512 | 8,878E-09  |
| TcCLB.507973.20  | hypothetical protein                                           | -1,513 | 1,556E-08  |
| TcCLB.511173.140 | hypothetical protein                                           | -1,513 | 0,008488   |
| TcCLB.503533.30  | trans-sialidase, Group V, putative                             | -1,515 | 0,002945   |
| TcCLB.509663.5   | dehydrogenase (pseudogene), putative                           | -1,517 | 3,327E-09  |
| TcCLB.508319.10  | hypothetical protein                                           | -1,517 | 0,000526   |
| TcCLB.511273.10  | dispersed gene family protein 1 (DGF-1, pseudogene), putative  | -1,523 | 0,00001222 |
| TcCLB.511449.95  | hypothetical protein, conserved (pseudogene)                   | -1,525 | 0,003563   |
| TcCLB.509663.47  | trans-sialidase (pseudogene), putative                         | -1,526 | 5,754E-09  |
| TcCLB.509631.45  | hypothetical protein, conserved (pseudogene)                   | -1,531 | 4,694E-11  |

|                  |                                                           |        |            |
|------------------|-----------------------------------------------------------|--------|------------|
| TcCLB.508741.415 | hypothetical protein, conserved (pseudogene)              | -1,532 | 4,434E-25  |
| TcCLB.511547.14  | mucin-associated surface protein (MASP), putative         | -1,537 | 0,00003807 |
| TcCLB.504039.210 | hypothetical protein                                      | -1,543 | 0,02347    |
| TcCLB.509065.70  | glyceraldehyde 3-phosphate dehydrogenase, putative        | -1,545 | 7,179E-67  |
| TcCLB.506461.10  | hypothetical protein, conserved                           | -1,547 | 0,003172   |
| TcCLB.507949.190 | trans-sialidase (pseudogene), putative                    | -1,549 | 7,268E-29  |
| TcCLB.503973.190 | mucin-associated surface protein (MASP), putative         | -1,552 | 0,00001446 |
| TcCLB.508307.180 | hypothetical protein, conserved                           | -1,574 | 3,903E-54  |
| TcCLB.511483.60  | hypothetical protein, conserved                           | -1,574 | 3,492E-10  |
| TcCLB.506435.370 | surface protease GP63, putative                           | -1,577 | 3,458E-31  |
| TcCLB.509607.50  | protein kinase, putative                                  | -1,582 | 6,763E-11  |
| TcCLB.504037.10  | hypothetical protein, conserved                           | -1,587 | 1,892E-38  |
| TcCLB.509065.60  | glyceraldehyde 3-phosphate dehydrogenase, putative        | -1,588 | 3,824E-101 |
| TcCLB.510071.20  | hypothetical protein                                      | -1,595 | 0,00043    |
| TcCLB.503625.10  | asparagine synthetase a, putative                         | -1,596 | 9,66E-44   |
| TcCLB.503773.30  | hypothetical protein, conserved                           | -1,596 | 1,054E-11  |
| TcCLB.504689.60  | dispersed gene family protein 1 (DGF-1), putative         | -1,607 | 7,52E-14   |
| TcCLB.507251.10  | hypothetical protein, conserved                           | -1,609 | 1,703E-42  |
| TcCLB.510627.215 | hypothetical protein, conserved (pseudogene)              | -1,614 | 0,006355   |
| TcCLB.511537.30  | hypothetical protein, conserved                           | -1,621 | 1,374E-74  |
| TcCLB.507953.170 | hypothetical protein                                      | -1,622 | 0,001599   |
| TcCLB.506859.230 | hypothetical protein, conserved                           | -1,622 | 0,002011   |
| TcCLB.507947.10  | conserved protein, unknown function                       | -1,637 | 2,37E-14   |
| TcCLB.507661.10  | retrotransposon hot spot protein (RHS, pseudogene), putat | -1,638 | 0,0003399  |
| TcCLB.424171.10  | trans-sialidase (pseudogene), putative                    | -1,638 | 0,0004008  |
| TcCLB.506229.20  | hypothetical protein, conserved                           | -1,64  | 3,054E-13  |
| TcCLB.509775.20  | protein kinase, putative                                  | -1,641 | 9,349E-76  |
| TcCLB.510377.340 | hypothetical protein                                      | -1,643 | 0,003344   |
| TcCLB.507237.280 | mucin TcMUCII, putative                                   | -1,643 | 0,05157    |
| TcCLB.511211.190 | hypothetical protein                                      | -1,647 | 4,537E-25  |
| TcCLB.507681.100 | ATP-binding cassette protein, putative                    | -1,651 | 6,949E-42  |
| TcCLB.508049.40  | hypothetical protein, conserved                           | -1,655 | 0,0001295  |
| TcCLB.508659.18  | mitochondrial carrier protein, putative                   | -1,656 | 3,371E-37  |
| TcCLB.511605.5   | mucin-associated surface protein (MASP, pseudogene), pu   | -1,67  | 8,683E-10  |
| TcCLB.507895.69  | hypothetical protein, conserved                           | -1,683 | 2,807E-18  |
| TcCLB.506039.10  | retrotransposon hot spot protein (RHS, pseudogene), putat | -1,683 | 4,4E-18    |
| TcCLB.425855.9   | hypothetical protein, conserved (fragment)                | -1,683 | 0,00003756 |
| TcCLB.507897.30  | serine/threonine-protein kinase a, putative               | -1,686 | 1,309E-47  |
| TcCLB.507023.100 | hypothetical protein                                      | -1,687 | 4,169E-32  |
| TcCLB.506247.330 | 2,3-bisphosphoglycerate-independent phosphoglycerate m    | -1,689 | 8,85E-54   |
| TcCLB.511461.30  | hypothetical protein, conserved                           | -1,69  | 2,576E-16  |
| TcCLB.511577.50  | endo-beta-N-acetylglucosaminidase, putative               | -1,697 | 2,77E-53   |
| TcCLB.508747.10  | hypothetical protein                                      | -1,7   | 0,00308    |
| TcCLB.507025.60  | RNA-binding protein, putative                             | -1,704 | 1,132E-08  |
| TcCLB.506943.60  | glyceraldehyde 3-phosphate dehydrogenase, putative        | -1,712 | 9,958E-25  |

|                  |                                                           |        |            |
|------------------|-----------------------------------------------------------|--------|------------|
| TcCLB.508717.60  | trans-sialidase, Group I, putative                        | -1,722 | 1,252E-22  |
| TcCLB.506705.70  | beta-fructofuranosidase-like protein (fragment)           | -1,723 | 2,465E-44  |
| TcCLB.511487.30  | dispersed gene family protein 1 (DGF-1), putative         | -1,723 | 4,46E-17   |
| TcCLB.508355.40  | choline/carnitine O-acetyltransferase, putative           | -1,726 | 1E-31      |
| TcCLB.508433.90  | mucin-associated surface protein (MASP), putative         | -1,726 | 0,002995   |
| TcCLB.511565.30  | mucin TcMUCII, putative                                   | -1,729 | 3,001E-09  |
| TcCLB.507859.31  | hypothetical protein                                      | -1,732 | 1,709E-09  |
| TcCLB.508221.410 | hypothetical protein                                      | -1,736 | 2,513E-06  |
| TcCLB.510593.10  | hypothetical protein, conserved                           | -1,738 | 2,748E-18  |
| TcCLB.510419.30  | hypothetical protein                                      | -1,74  | 0,00134    |
| TcCLB.511725.80  | hypothetical protein                                      | -1,745 | 1,451E-78  |
| TcCLB.506501.100 | hypothetical protein                                      | -1,748 | 0,002743   |
| TcCLB.510537.68  | syntaxin binding protein (pseudogene), putative           | -1,749 | 0,00003358 |
| TcCLB.503913.40  | hypothetical protein                                      | -1,751 | 2,952E-21  |
| TcCLB.509553.10  | hypothetical protein, conserved                           | -1,752 | 6,825E-21  |
| TcCLB.509663.30  | thymidylate kinase, putative                              | -1,754 | 2,719E-21  |
| TcCLB.511863.10  | mucin-associated surface protein (MASP), putative         | -1,755 | 3,753E-12  |
| TcCLB.508221.329 | mucin-associated surface protein (MASP, pseudogene), pu   | -1,758 | 0,003529   |
| TcCLB.456627.10  | trans-sialidase (pseudogene), putative                    | -1,762 | 0,02921    |
| TcCLB.511183.610 | hypothetical protein                                      | -1,763 | 0,00001488 |
| TcCLB.511255.320 | surface protease GP63, putative                           | -1,766 | 0,004127   |
| TcCLB.511289.80  | polyprenyl synthase, putative                             | -1,783 | 2,127E-72  |
| TcCLB.508693.100 | surface protease GP63, putative                           | -1,783 | 4,52E-49   |
| TcCLB.508231.130 | Cell division control protein 48, putative                | -1,788 | 3,996E-24  |
| TcCLB.511099.140 | mucin-associated surface protein (MASP), putative         | -1,789 | 0,001233   |
| TcCLB.511427.10  | conserved protein, unknown function (fragment)            | -1,789 | 0,007259   |
| TcCLB.506943.50  | glyceraldehyde 3-phosphate dehydrogenase, putative        | -1,794 | 1,419E-68  |
| TcCLB.510329.90  | C-8 sterol isomerase, putative                            | -1,795 | 5,612E-59  |
| TcCLB.505567.20  | surface protease GP63, putative                           | -1,8   | 4,512E-06  |
| TcCLB.511309.80  | trans-sialidase (pseudogene), putative                    | -1,803 | 7,148E-39  |
| TcCLB.507143.90  | hypothetical protein                                      | -1,81  | 0,0172     |
| TcCLB.508089.30  | hypothetical protein, conserved                           | -1,818 | 1,055E-83  |
| TcCLB.511277.359 | phosphatidic acid phosphatase, putative                   | -1,826 | 9,649E-61  |
| TcCLB.511487.51  | hypothetical protein                                      | -1,829 | 6,218E-10  |
| TcCLB.506067.110 | mucin-associated surface protein (MASP, pseudogene), pu   | -1,834 | 0,00001981 |
| TcCLB.508365.80  | hypothetical protein                                      | -1,846 | 0,008377   |
| TcCLB.507281.19  | retrotransposon hot spot protein (RHS, pseudogene), putat | -1,848 | 1,481E-13  |
| TcCLB.509697.29  | hypothetical protein                                      | -1,85  | 0,0001608  |
| TcCLB.510629.210 | dispersed gene family protein 1 (DGF-1), putative         | -1,856 | 2,333E-09  |
| TcCLB.506501.300 | hypothetical protein                                      | -1,856 | 0,0003789  |
| TcCLB.510615.4   | hypothetical protein, conserved                           | -1,857 | 1,953E-29  |
| TcCLB.508743.5   | hypothetical protein, conserved (pseudogene)              | -1,861 | 1,786E-12  |
| TcCLB.508233.50  | variant-surface-glycoprotein phospholipase C, putative    | -1,866 | 1,057E-45  |
| TcCLB.506257.50  | surface protease GP63, putative                           | -1,874 | 7,039E-21  |
| TcCLB.508907.10  | hypothetical protein, conserved                           | -1,883 | 7,93E-41   |

|                  |                                                               |        |            |
|------------------|---------------------------------------------------------------|--------|------------|
| TcCLB.510629.70  | mucin-associated surface protein (MASP), putative             | -1,884 | 0,00001471 |
| TcCLB.509907.50  | hypothetical protein, conserved (pseudogene)                  | -1,891 | 0,00003311 |
| TcCLB.508433.50  | retrotransposon hot spot protein (RHS, pseudogene), putative  | -1,894 | 1,45E-08   |
| TcCLB.509663.50  | trans-sialidase, Group VIII, putative                         | -1,896 | 2,477E-18  |
| TcCLB.437805.9   | trans-sialidase (pseudogene), putative                        | -1,896 | 0,0004935  |
| TcCLB.507305.40  | zinc finger CCCH domain containing protein 11 (ZC3H11)        | -1,904 | 0,0005112  |
| TcCLB.504005.6   | RNA-binding protein, putative                                 | -1,905 | 9,9E-39    |
| TcCLB.507623.140 | endonuclease G, putative                                      | -1,911 | 7,088E-44  |
| TcCLB.507467.40  | choline/carnitine O-acetyltransferase (pseudogene), putative  | -1,912 | 7,605E-32  |
| TcCLB.503773.40  | hypothetical protein, conserved                               | -1,913 | 8,736E-28  |
| TcCLB.508209.94  | hypothetical protein                                          | -1,919 | 4,207E-37  |
| TcCLB.507099.80  | ABC transporter, putative                                     | -1,939 | 1,064E-136 |
| TcCLB.508857.40  | UDP-glucuronosyl and UDP-glucosyl transferase, putative       | -1,944 | 2,284E-51  |
| TcCLB.507237.356 | syntaxin binding protein (pseudogene), putative               | -1,946 | 0,0000414  |
| TcCLB.511547.20  | trans-sialidase, Group IV, putative                           | -1,95  | 0,00003091 |
| TcCLB.510709.60  | mucin-associated surface protein (MASP), putative             | -1,95  | 0,000981   |
| TcCLB.507859.15  | hypothetical protein                                          | -1,971 | 1,516E-20  |
| TcCLB.510709.50  | mucin TcMUCII (pseudogene), putative                          | -1,973 | 0,001379   |
| TcCLB.511911.10  | trans-sialidase, Group II, putative                           | -1,995 | 3,256E-15  |
| TcCLB.510481.30  | hypothetical protein, conserved                               | -1,997 | 0,00002662 |
| TcCLB.510261.21  | hypothetical protein                                          | -2,005 | 0,0001307  |
| TcCLB.507641.300 | chaperonin HSP60, mitochondrial precursor (HSP60)             | -2,014 | 0,0001136  |
| TcCLB.510629.270 | syntaxin binding protein (pseudogene), putative               | -2,051 | 0,00001498 |
| TcCLB.506229.50  | nucleoside phosphatase, putative                              | -2,053 | 5,249E-83  |
| TcCLB.511605.10  | hypothetical protein                                          | -2,054 | 0,0002872  |
| TcCLB.510701.40  | mucin-associated surface protein (MASP, pseudogene), putative | -2,058 | 7,994E-06  |
| TcCLB.428403.10  | hypothetical protein (fragment)                               | -2,069 | 1,074E-08  |
| TcCLB.509553.60  | mitogen-activated protein kinase 3, putative                  | -2,083 | 1,451E-50  |
| TcCLB.509137.20  | hypothetical protein                                          | -2,087 | 5,044E-86  |
| TcCLB.510773.40  | hypothetical protein                                          | -2,096 | 2,012E-29  |
| TcCLB.507069.20  | hypothetical protein                                          | -2,097 | 0,001826   |
| TcCLB.508777.210 | hypothetical protein                                          | -2,098 | 2,283E-08  |
| TcCLB.510705.10  | mucin-associated surface protein (MASP), putative             | -2,099 | 0,00004131 |
| TcCLB.506495.40  | hypothetical protein                                          | -2,102 | 4,412E-102 |
| TcCLB.507705.20  | hypothetical protein, conserved                               | -2,112 | 3,91E-21   |
| TcCLB.507397.9   | dispersed gene family protein 1 (DGF-1), putative             | -2,114 | 0,000196   |
| TcCLB.510089.20  | surface protease GP63, putative                               | -2,12  | 0,00315    |
| TcCLB.510629.290 | mucin-associated surface protein (MASP, pseudogene), putative | -2,121 | 1,484E-15  |
| TcCLB.507705.10  | hypothetical protein, conserved                               | -2,126 | 4,864E-30  |
| TcCLB.503639.10  | inositol-3-phosphate synthase, putative                       | -2,128 | 2,726E-65  |
| TcCLB.509313.9   | trans-sialidase (pseudogene), putative                        | -2,142 | 0,0005228  |
| TcCLB.510197.160 | mucin-associated surface protein (MASP, pseudogene), putative | -2,147 | 9,681E-47  |
| TcCLB.507959.290 | hypothetical protein                                          | -2,147 | 0,001236   |
| TcCLB.509075.20  | dispersed gene family protein 1 (DGF-1, pseudogene), putative | -2,165 | 1,514E-07  |
| TcCLB.506039.30  | dispersed gene family protein 1 (DGF-1), putative             | -2,175 | 4,516E-16  |

|                  |                                                           |        |            |
|------------------|-----------------------------------------------------------|--------|------------|
| TcCLB.510181.9   | inositol-3-phosphate synthase, putative (fragment)        | -2,179 | 3,421E-79  |
| TcCLB.509475.10  | mitogen-activated protein kinase 3, putative              | -2,222 | 2,201E-30  |
| TcCLB.511547.40  | retrotransposon hot spot protein (RHS, pseudogene), putat | -2,247 | 3,658E-31  |
| TcCLB.511521.27  | hypothetical protein, conserved                           | -2,252 | 7,885E-72  |
| TcCLB.508481.10  | trans-sialidase, Group IV, putative                       | -2,257 | 0,003125   |
| TcCLB.511021.30  | hypothetical protein, conserved                           | -2,274 | 7,34E-111  |
| TcCLB.506683.240 | trans-sialidase, Group II, putative                       | -2,277 | 1,025E-138 |
| TcCLB.509731.10  | poly-zinc finger protein 2, putative                      | -2,314 | 4,763E-13  |
| TcCLB.507609.60  | inositol-3-phosphate synthase, putative                   | -2,323 | 3,061E-83  |
| TcCLB.509197.39  | cation transporter, putative                              | -2,333 | 2,09E-162  |
| TcCLB.503773.24  | hypothetical protein, conserved                           | -2,351 | 1,569E-31  |
| TcCLB.508243.36  | hypothetical protein                                      | -2,36  | 0,00006498 |
| TcCLB.503773.9   | hypothetical protein, conserved (fragment)                | -2,382 | 9,282E-41  |
| TcCLB.506789.334 | hypothetical protein, conserved                           | -2,385 | 1,714E-53  |
| TcCLB.509663.20  | hypothetical protein, conserved                           | -2,389 | 8,349E-50  |
| TcCLB.505945.5   | mitogen-activated protein kinase 3, putative (fragment)   | -2,396 | 2,386E-15  |
| TcCLB.508741.130 | hypothetical protein                                      | -2,397 | 5,919E-150 |
| TcCLB.504039.200 | mucin-associated surface protein (MASP), putative         | -2,4   | 0,0001342  |
| TcCLB.509075.31  | hypothetical protein, conserved (pseudogene)              | -2,408 | 0,002532   |
| TcCLB.506115.9   | dispersed gene family protein 1 (DGF-1), putative         | -2,425 | 2,46E-20   |
| TcCLB.511903.50  | amastin, putative                                         | -2,431 | 8,584E-83  |
| TcCLB.506841.20  | trans-sialidase, Group I, putative                        | -2,445 | 3,002E-47  |
| TcCLB.510363.280 | mucin-associated surface protein (MASP), putative         | -2,448 | 1,514E-12  |
| TcCLB.510171.10  | trans-sialidase, putative (fragment)                      | -2,453 | 2,523E-83  |
| TcCLB.469785.40  | RNA-binding protein, putative                             | -2,49  | 2,783E-65  |
| TcCLB.509325.10  | mucin-associated surface protein (MASP), putative         | -2,503 | 0,00007217 |
| TcCLB.506149.20  | hypothetical protein, conserved                           | -2,52  | 5,52E-34   |
| TcCLB.511565.10  | mucin TcMUCII, putative (fragment)                        | -2,52  | 6,115E-09  |
| TcCLB.509075.70  | retrotransposon hot spot protein (RHS, pseudogene), putat | -2,538 | 0,00003049 |
| TcCLB.510709.31  | syntaxin binding protein (pseudogene), putative           | -2,541 | 2,562E-09  |
| TcCLB.507025.50  | RNA-binding protein, putative                             | -2,553 | 1,585E-48  |
| TcCLB.507859.60  | mucin-associated surface protein (MASP), putative         | -2,561 | 6,455E-06  |
| TcCLB.510709.70  | trans-sialidase, Group V, putative                        | -2,565 | 3,025E-09  |
| TcCLB.508433.30  | mucin-associated surface protein (MASP), putative         | -2,567 | 4,062E-06  |
| TcCLB.507237.359 | surface protease GP63 (pseudogene), putative              | -2,575 | 0,00001597 |
| TcCLB.509663.37  | hypothetical protein, conserved                           | -2,586 | 5,633E-93  |
| TcCLB.509881.9   | dispersed gene family protein 1 (DGF-1), putative (fragme | -2,592 | 2,645E-07  |
| TcCLB.506149.29  | hypothetical protein, conserved                           | -2,603 | 1,026E-17  |
| TcCLB.503705.11  | UDP-Gal or UDP-GlcNAc-dependent glycosyltransferase (p:   | -2,621 | 1,126E-07  |
| TcCLB.438923.10  | hypothetical protein (fragment)                           | -2,633 | 1,63E-108  |
| TcCLB.508647.280 | malic enzyme                                              | -2,654 | 3,893E-250 |
| TcCLB.416041.14  | trans-sialidase, putative (fragment)                      | -2,67  | 8,07E-167  |
| TcCLB.402255.10  | retrotransposon hot spot protein (RHS, pseudogene), putat | -2,732 | 2,828E-26  |
| TcCLB.510831.21  | trans-sialidase, putative (fragment)                      | -2,739 | 9,239E-10  |
| TcCLB.508433.10  | mucin-associated surface protein (MASP), putative         | -2,743 | 7,009E-06  |

|                  |                                                                  |        |            |
|------------------|------------------------------------------------------------------|--------|------------|
| TcCLB.504405.10  | dispersed gene family protein 1 (DGF-1), putative                | -2,747 | 0,00004793 |
| TcCLB.503475.10  | dispersed gene family protein 1 (DGF-1, pseudogene), putative    | -2,747 | 0,00005469 |
| TcCLB.504105.140 | enolase                                                          | -2,777 | 2,551E-198 |
| TcCLB.510875.10  | dispersed gene family protein 1 (DGF-1, pseudogene), putative    | -2,778 | 4,466E-13  |
| TcCLB.504733.10  | beta galactofuranosyl glycosyltransferase (pseudogene), putative | -2,786 | 7,602E-15  |
| TcCLB.507613.10  | dispersed gene family protein 1 (DGF-1), putative                | -2,804 | 1,481E-11  |
| TcCLB.511563.20  | trans-sialidase (pseudogene), putative                           | -2,844 | 1,046E-12  |
| TcCLB.506067.100 | mucin TcMUCII, putative                                          | -2,86  | 5,606E-08  |
| TcCLB.450161.10  | cation transporter, putative                                     | -2,861 | 0          |
| TcCLB.503773.50  | Nucleolar protein 56, putative (fragment) (NOP56)                | -2,871 | 5,659E-89  |
| TcCLB.508701.10  | ZIP Zn transporter, putative                                     | -2,891 | 9,552E-92  |
| TcCLB.508699.130 | cation transporter, putative (fragment)                          | -2,908 | 3,123E-219 |
| TcCLB.509241.10  | surface protease GP63, putative (fragment)                       | -2,933 | 1,492E-64  |
| TcCLB.511907.350 | surface protease GP63 (pseudogene), putative                     | -2,944 | 4,977E-53  |
| TcCLB.509197.30  | cation transporter, putative                                     | -2,945 | 1,812E-105 |
| TcCLB.511755.10  | hypothetical protein, conserved                                  | -2,947 | 6,075E-103 |
| TcCLB.511551.40  | retrotransposon hot spot protein (RHS, pseudogene), putative     | -2,964 | 4,498E-16  |
| TcCLB.507489.9   | dispersed gene family protein 1 (DGF-1), putative (fragment)     | -2,971 | 1,189E-12  |
| TcCLB.509663.44  | hypothetical protein, conserved                                  | -2,979 | 3,934E-121 |
| TcCLB.508905.10  | hypothetical protein, conserved (pseudogene)                     | -2,983 | 4,567E-113 |
| TcCLB.509267.110 | heat shock protein Hsp20, putative                               | -2,999 | 2,051E-109 |
| TcCLB.413489.10  | retrotransposon hot spot protein (RHS, pseudogene), putative     | -3,04  | 1,063E-12  |
| TcCLB.505183.30  | malic enzyme, putative                                           | -3,069 | 0          |
| TcCLB.507867.10  | mucin-associated surface protein (MASP), putative                | -3,07  | 1,677E-10  |
| TcCLB.505425.9   | dispersed gene family protein 1 (DGF-1, pseudogene), putative    | -3,152 | 1,122E-14  |
| TcCLB.464391.10  | retrotransposon hot spot protein (RHS, pseudogene), putative     | -3,162 | 3,124E-12  |
| TcCLB.509553.50  | DNA repair and recombination helicase protein PIF5, putative     | -3,201 | 3,06E-166  |
| TcCLB.504145.10  | trans-sialidase, Group II, putative                              | -3,207 | 1,099E-07  |
| TcCLB.506495.50  | hypothetical protein                                             | -3,246 | 8,202E-164 |
| TcCLB.506087.10  | retrotransposon hot spot protein (RHS, pseudogene), putative     | -3,251 | 2,639E-12  |
| TcCLB.508061.10  | hypothetical protein                                             | -3,305 | 9,713E-193 |
| TcCLB.507711.100 | procyclic form surface phosphoprotein, putative                  | -3,308 | 1,192E-192 |
| TcCLB.510363.290 | hypothetical protein                                             | -3,354 | 2,012E-06  |
| TcCLB.510481.20  | dispersed gene family protein 1 (DGF-1, pseudogene), putative    | -3,358 | 1,341E-30  |
| TcCLB.509325.16  | elongation factor 1-gamma (EF-1-gamma, pseudogene), putative     | -3,385 | 3,708E-14  |
| TcCLB.509325.4   | surface protease GP63, putative (fragment)                       | -3,393 | 0,08195    |
| TcCLB.507951.150 | guanine deaminase, putative                                      | -3,394 | 0          |
| TcCLB.511549.10  | retrotransposon hot spot protein (RHS, pseudogene), putative     | -3,426 | 2,167E-24  |
| TcCLB.508481.20  | mucin-associated surface protein (MASP), putative                | -3,443 | 3,606E-06  |
| TcCLB.507705.30  | hypothetical protein, conserved                                  | -3,473 | 2,242E-100 |
| TcCLB.504431.100 | guanine deaminase, putative                                      | -3,533 | 4,749E-239 |
| TcCLB.508485.30  | retrotransposon hot spot protein (RHS, pseudogene), putative     | -3,539 | 8,201E-32  |
| TcCLB.508581.30  | beta galactofuranosyl glycosyltransferase (pseudogene), putative | -3,546 | 2,894E-09  |
| TcCLB.507639.10  | poly-zinc finger protein 2, putative                             | -3,551 | 1,046E-82  |
| TcCLB.466325.10  | trans-sialidase (pseudogene), putative                           | -3,872 | 1,168E-41  |

|                 |                                                           |        |            |
|-----------------|-----------------------------------------------------------|--------|------------|
| TcCLB.507145.70 | mucin-associated surface protein (MASP, pseudogene), pu   | -3,877 | 5,456E-25  |
| TcCLB.508581.10 | trans-sialidase, Group VII, putative                      | -3,882 | 2,571E-33  |
| TcCLB.511551.50 | trans-sialidase (pseudogene), putative                    | -4,191 | 5,831E-10  |
| TcCLB.508485.10 | trans-sialidase, Group II, putative                       | -4,218 | 2,434E-14  |
| TcCLB.509075.40 | mucin-associated surface protein (MASP), putative         | -4,342 | 0,0009103  |
| TcCLB.507145.79 | mucin TcMUCII, putative                                   | -4,452 | 2,839E-07  |
| TcCLB.507867.5  | trans-sialidase, putative (fragment)                      | -4,584 | 0,00002407 |
| TcCLB.508483.40 | retrotransposon hot spot protein (RHS, pseudogene), putat | -4,673 | 2,268E-28  |
| TcCLB.506231.10 | trans-sialidase, putative                                 | -4,865 | 2,241E-213 |
| TcCLB.509663.69 | trans-sialidase, putative (fragment)                      | -4,895 | 2,523E-11  |
| TcCLB.508483.26 | trans-sialidase (pseudogene), putative                    | -5,217 | 3,514E-16  |
| TcCLB.508581.40 | trans-sialidase, Group II, putative                       | -5,48  | 5,666E-09  |



epi\_over\_tryp

| geneid           | genedescription                                        | deseq_logfc | deseq_adjp |
|------------------|--------------------------------------------------------|-------------|------------|
| TcCLB.506357.50  | alcohol dehydrogenase, putative                        | 6,298       | 0          |
| TcCLB.511391.120 | glutamamyl carboxypeptidase, putative                  | 5,936       | 0          |
| TcCLB.511277.60  | alcohol dehydrogenase, putative                        | 5,81        | 0          |
| TcCLB.467287.20  | hypothetical protein, conserved                        | 5,528       | 2,967E-43  |
| TcCLB.510103.24  | hypothetical protein, conserved                        | 5,437       | 0          |
| TcCLB.509713.30  | hypothetical protein, conserved                        | 5,412       | 0          |
| TcCLB.509213.120 | cytosolic nonspecific dipeptidase, putative            | 5,393       | 0          |
| TcCLB.510535.100 | cysteine peptidase C (CPC), putative (TCCB)            | 5,333       | 0          |
| TcCLB.509233.170 | hypothetical protein, conserved                        | 5,207       | 6,839E-100 |
| TcCLB.509105.70  | thiol-dependent reductase 1, putative (TcAc2)          | 5,134       | 0          |
| TcCLB.508999.260 | calpain-like cysteine peptidase (pseudogene), putative | 5,089       | 0          |
| TcCLB.510257.80  | cytosolic nonspecific dipeptidase, putative            | 5,072       | 0          |
| TcCLB.506563.170 | calpain-like cysteine peptidase (pseudogene), putative | 4,92        | 0          |
| TcCLB.510357.20  | hypothetical protein, conserved                        | 4,874       | 6,743E-103 |
| TcCLB.511497.19  | amastin, putative                                      | 4,753       | 1,345E-193 |
| TcCLB.511073.10  | fatty acid desaturase, putative                        | 4,739       | 3,974E-292 |
| TcCLB.503419.30  | thiol-dependent reductase 1, putative (TcAc2)          | 4,71        | 0          |
| TcCLB.511003.160 | hypothetical protein, conserved                        | 4,704       | 2,003E-179 |
| TcCLB.511075.9   | fatty acid desaturase, putative (fragment)             | 4,686       | 8,306E-207 |
| TcCLB.510855.10  | peptide methionine sulfoxide reductase, putative       | 4,641       | 0          |
| TcCLB.510837.9   | acetylornithine deacetylase, putative (fragment)       | 4,442       | 1,141E-104 |
| TcCLB.507853.10  | lathosterol oxidase, putative                          | 4,42        | 5,482E-163 |
| TcCLB.510357.30  | hypothetical protein, conserved                        | 4,372       | 3,562E-141 |
| TcCLB.504425.60  | NADP-dependent alcohol hydrogenase, putative           | 4,301       | 2,153E-244 |
| TcCLB.507891.29  | flagellar calcium-binding protein, putative            | 4,295       | 1,466E-12  |
| TcCLB.511201.49  | hypothetical protein, conserved                        | 4,243       | 0          |
| TcCLB.508017.30  | amino acid transporter, putative (fragment)            | 4,202       | 2,027E-295 |
| TcCLB.510679.100 | lipase, putative                                       | 4,201       | 6,705E-234 |
| TcCLB.511859.200 | hypothetical protein, conserved                        | 4,182       | 0          |
| TcCLB.506773.50  | nucleoside transporter-like, putative                  | 4,174       | 0          |
| TcCLB.506559.410 | hypothetical protein, conserved                        | 4,163       | 3,535E-234 |
| TcCLB.509003.30  | calpain-like cysteine peptidase, putative              | 4,135       | 5,324E-257 |
| TcCLB.506661.30  | fatty acid elongase, putative                          | 4,125       | 0          |
| TcCLB.509965.394 | amastin, putative                                      | 4,112       | 9,014E-137 |
| TcCLB.503837.10  | hypothetical protein, conserved                        | 4,046       | 1,655E-247 |
| TcCLB.507949.250 | hypothetical protein, conserved                        | 4,01        | 0          |
| TcCLB.508111.30  | glutamate dehydrogenase, putative                      | 3,992       | 0          |
| TcCLB.506789.352 | hypothetical protein, conserved                        | 3,987       | 3,613E-66  |
| TcCLB.507689.40  | glutamamyl carboxypeptidase, putative                  | 3,985       | 0          |
| TcCLB.509239.10  | fatty acid desaturase, putative                        | 3,974       | 9,73E-298  |
| TcCLB.508065.70  | protein associated with differentiation 8, putative    | 3,971       | 4,557E-143 |
| TcCLB.506563.79  | calpain-like cysteine peptidase (pseudogene), putative | 3,95        | 7,728E-247 |
| TcCLB.511245.130 | fatty acid elongase, putative                          | 3,91        | 3,403E-287 |

|                  |                                                           |       |            |
|------------------|-----------------------------------------------------------|-------|------------|
| TcCLB.504045.60  | thermostable carboxypeptidase 2, putative                 | 3,907 | 0          |
| TcCLB.507047.150 | D-arabinono-1,4-lactone oxidase, putative (ALO)           | 3,903 | 5,233E-227 |
| TcCLB.426435.9   | fatty acid desaturase, putative                           | 3,868 | 9,065E-288 |
| TcCLB.511439.40  | hypothetical protein                                      | 3,867 | 3,599E-293 |
| TcCLB.511685.20  | mucin TcSMUGS, putative                                   | 3,848 | 1,403E-284 |
| TcCLB.511687.19  | voltage-dependent anion-selective channel, putative (frag | 3,848 | 1,516E-28  |
| TcCLB.509023.80  | hypothetical protein, conserved                           | 3,84  | 0          |
| TcCLB.509157.220 | hypothetical protein, conserved                           | 3,837 | 6,147E-200 |
| TcCLB.506825.200 | hypothetical protein                                      | 3,833 | 1,35E-302  |
| TcCLB.508545.40  | surface protease GP63, putative                           | 3,809 | 0          |
| TcCLB.506367.30  | 1,2-Dihydroxy-3-keto-5-methylthiopentene dioxygenase, p   | 3,804 | 0          |
| TcCLB.508209.100 | 10 kDa heat shock protein, putative                       | 3,803 | 4,509E-101 |
| TcCLB.506789.340 | hypothetical protein, conserved                           | 3,796 | 4,061E-206 |
| TcCLB.509197.50  | hypothetical protein, conserved                           | 3,784 | 1,558E-154 |
| TcCLB.504533.50  | hypothetical protein, conserved                           | 3,751 | 1,221E-181 |
| TcCLB.506551.10  | protein associated with differentiation 4, putative       | 3,72  | 3,592E-279 |
| TcCLB.507689.50  | metallo-peptidase, clan MH, family M18, putative (fragm   | 3,716 | 0          |
| TcCLB.510613.40  | hypothetical protein, conserved (fragment)                | 3,704 | 2,244E-63  |
| TcCLB.508923.10  | amino acid permease, putative                             | 3,7   | 9,624E-184 |
| TcCLB.509965.390 | amastin, putative                                         | 3,693 | 5,035E-234 |
| TcCLB.506753.130 | hypothetical protein, conserved                           | 3,691 | 5,237E-138 |
| TcCLB.509205.120 | hypothetical protein, conserved                           | 3,684 | 0          |
| TcCLB.506247.220 | histidine ammonia-lyase, putative                         | 3,683 | 0          |
| TcCLB.506401.380 | surface protease GP63, putative                           | 3,671 | 0          |
| TcCLB.503413.4   | Present in the outer mitochondrial membrane proteome 2    | 3,633 | 5,652E-112 |
| TcCLB.508735.100 | hypothetical protein, conserved                           | 3,627 | 9,555E-208 |
| TcCLB.508741.80  | mucin TcSMUGS, putative                                   | 3,614 | 4,53E-48   |
| TcCLB.503747.10  | glutamine aminotransferase, putative (fragment) (GlnAT)   | 3,604 | 5,541E-193 |
| TcCLB.508263.5   | hypothetical protein, conserved (fragment)                | 3,594 | 2,513E-135 |
| TcCLB.511303.34  | Macro domain containing protein, putative                 | 3,588 | 6,843E-163 |
| TcCLB.510667.120 | galactokinase, putative                                   | 3,583 | 1,245E-285 |
| TcCLB.511685.10  | mucin TcSMUGS, putative                                   | 3,58  | 4,941E-172 |
| TcCLB.510725.40  | hypothetical protein, conserved                           | 3,574 | 6,996E-166 |
| TcCLB.510811.20  | protein associated with differentiation 4, putative       | 3,56  | 2,174E-202 |
| TcCLB.509051.20  | amastin, putative                                         | 3,548 | 5,717E-189 |
| TcCLB.508741.70  | mucin TcSMUGS, putative                                   | 3,547 | 3,928E-81  |
| TcCLB.506227.10  | amino acid transporter, putative                          | 3,539 | 2,152E-178 |
| TcCLB.506629.200 | 1,2-Dihydroxy-3-keto-5-methylthiopentene dioxygenase, p   | 3,532 | 7,992E-273 |
| TcCLB.509569.100 | nucleoside phosphorylase, putative                        | 3,529 | 8,766E-259 |
| TcCLB.510187.30  | tyrosine aminotransferase                                 | 3,524 | 6,788E-58  |
| TcCLB.508173.160 | hypothetical protein, conserved                           | 3,499 | 3,013E-254 |
| TcCLB.511679.10  | mucin TcSMUGS, putative                                   | 3,49  | 3,729E-102 |
| TcCLB.511809.120 | hypothetical protein, conserved                           | 3,488 | 1,663E-231 |
| TcCLB.506563.40  | beta tubulin, putative                                    | 3,483 | 2,526E-137 |
| TcCLB.508693.50  | amidinotransferase, putative                              | 3,478 | 0          |

|                  |                                                           |       |            |
|------------------|-----------------------------------------------------------|-------|------------|
| TcCLB.511391.110 | histone-lysine N-methyltransferase, putative (DOT1A)      | 3,478 | 7,732E-208 |
| TcCLB.507359.10  | hypothetical protein, conserved                           | 3,472 | 2,435E-64  |
| TcCLB.511385.30  | Pyrophosphate-energized vacuolar membrane proton pump     | 3,461 | 0          |
| TcCLB.511693.10  | hypothetical protein                                      | 3,461 | 4,385E-247 |
| TcCLB.510311.90  | quinone oxidoreductase, putative                          | 3,45  | 1,662E-265 |
| TcCLB.509107.9   | hypothetical protein, conserved (fragment)                | 3,446 | 2,432E-69  |
| TcCLB.511685.30  | mucin TcSMUGS, putative                                   | 3,443 | 2,946E-69  |
| TcCLB.504047.5   | urocanate hydratase, putative (fragment)                  | 3,439 | 2,229E-16  |
| TcCLB.508503.20  | cytochrome c oxidase subunit V, putative                  | 3,436 | 0          |
| TcCLB.509683.10  | hypothetical protein                                      | 3,432 | 0          |
| TcCLB.511817.40  | NADH-cytochrome b5 reductase, putative                    | 3,416 | 8,664E-151 |
| TcCLB.440101.10  | fatty acid desaturase, putative (fragment)                | 3,409 | 2,114E-64  |
| TcCLB.507187.9   | dispersed gene family protein 1 (DGF-1), putative         | 3,406 | 2,607E-133 |
| TcCLB.506937.10  | cytosolic malate dehydrogenase, putative                  | 3,401 | 2,41E-126  |
| TcCLB.510661.250 | cystathione gamma lyase, putative                         | 3,397 | 0          |
| TcCLB.510679.40  | hypothetical protein                                      | 3,392 | 3,387E-183 |
| TcCLB.506739.99  | zinc finger (CCCH type) protein, putative                 | 3,388 | 0          |
| TcCLB.511051.10  | hypothetical protein                                      | 3,383 | 3,074E-64  |
| TcCLB.437545.10  | 3-oxo-5-alpha-steroid 4-dehydrogenase, putative           | 3,375 | 4,69E-146  |
| TcCLB.510187.40  | tyrosine aminotransferase                                 | 3,372 | 4,413E-235 |
| TcCLB.510837.20  | glutamamyl carboxypeptidase, putative                     | 3,371 | 7,58E-62   |
| TcCLB.509895.30  | hypothetical protein, conserved                           | 3,364 | 0          |
| TcCLB.503411.30  | hypothetical protein, conserved                           | 3,363 | 2,299E-53  |
| TcCLB.509041.10  | tyrosine aminotransferase, putative                       | 3,36  | 4,963E-11  |
| TcCLB.509237.151 | calpain-like cysteine peptidase, putative (fragment)      | 3,358 | 9,494E-117 |
| TcCLB.511717.30  | chromosomal passenger protein, putative (CPC1)            | 3,344 | 1,465E-112 |
| TcCLB.511909.50  | hypothetical protein, conserved                           | 3,341 | 2,849E-126 |
| TcCLB.507657.20  | glutamamyl carboxypeptidase, putative                     | 3,336 | 5,569E-305 |
| TcCLB.505989.110 | amidinotransferase, putative                              | 3,333 | 0          |
| TcCLB.508741.60  | mucin TcSMUGS, putative                                   | 3,331 | 2,014E-82  |
| TcCLB.507689.30  | glutamamyl carboxypeptidase, putative                     | 3,33  | 0          |
| TcCLB.509707.10  | protein associated with differentiation 8, putative       | 3,33  | 6,349E-74  |
| TcCLB.507657.10  | glutamamyl carboxypeptidase, putative                     | 3,31  | 0          |
| TcCLB.510187.70  | tyrosine aminotransferase, putative                       | 3,306 | 6,908E-229 |
| TcCLB.503925.6   | hypothetical protein, conserved                           | 3,293 | 8,463E-26  |
| TcCLB.503939.20  | hypothetical protein, conserved                           | 3,289 | 8,038E-169 |
| TcCLB.509805.190 | hypothetical protein, conserved                           | 3,289 | 2,841E-122 |
| TcCLB.508741.229 | Mitochondrial outer membrane protein porin, putative (VI) | 3,284 | 1,085E-255 |
| TcCLB.510249.30  | hypothetical protein, conserved                           | 3,272 | 5,406E-36  |
| TcCLB.506885.310 | meiotic recombination protein DMC1, putative (dmc1)       | 3,266 | 1,28E-140  |
| TcCLB.508737.210 | Mitochondrial outer membrane protein porin, putative (VI) | 3,262 | 1,197E-241 |
| TcCLB.411235.9   | alpha tubulin, putative                                   | 3,257 | 0          |
| TcCLB.506513.110 | peptidase t, putative                                     | 3,248 | 8,573E-199 |
| TcCLB.510187.50  | tyrosine aminotransferase                                 | 3,245 | 0          |
| TcCLB.508917.49  | peptidase t, putative                                     | 3,239 | 2,65E-87   |

|                  |                                                          |       |            |
|------------------|----------------------------------------------------------|-------|------------|
| TcCLB.462761.16  | hypothetical protein, conserved (fragment)               | 3,228 | 4,828E-69  |
| TcCLB.508799.270 | protein associated with differentiation 4, putative      | 3,223 | 7,674E-288 |
| TcCLB.508919.10  | peptidase T (pseudogene), putative                       | 3,22  | 2,12E-99   |
| TcCLB.504765.20  | protein associated with differentiation 8, putative      | 3,2   | 3,306E-28  |
| TcCLB.509003.70  | beta tubulin (pseudogene), putative                      | 3,187 | 2,64E-235  |
| TcCLB.511287.49  | aldo-keto reductase (AKR)                                | 3,187 | 3,153E-130 |
| TcCLB.510565.30  | cytochrome c oxidase subunit V, putative                 | 3,184 | 2,332E-290 |
| TcCLB.504045.110 | urocanate hydratase, putative                            | 3,171 | 0          |
| TcCLB.508741.40  | mucin TcSMUGS, putative                                  | 3,171 | 1,744E-227 |
| TcCLB.511129.60  | hypothetical protein, conserved                          | 3,151 | 1,198E-134 |
| TcCLB.510773.20  | Pyrophosphate-energized vacuolar membrane proton pump    | 3,15  | 8,25E-247  |
| TcCLB.508001.70  | retrotransposon hot spot (RHS) protein, putative         | 3,148 | 6,716E-145 |
| TcCLB.506823.50  | retrotransposon hot spot protein (RHS, pseudogene), puta | 3,147 | 9,389E-179 |
| TcCLB.510795.10  | tyrosine aminotransferase (2.6.1.5)                      | 3,144 | 8,507E-256 |
| TcCLB.511687.10  | Mitochondrial outer membrane protein porin, putative (VI | 3,141 | 2,901E-158 |
| TcCLB.506257.98  | hypothetical protein, conserved (pseudogene)             | 3,133 | 4,54E-134  |
| TcCLB.507009.40  | galactokinase, putative                                  | 3,128 | 2,381E-195 |
| TcCLB.510039.40  | nitrilase, putative                                      | 3,123 | 2,166E-241 |
| TcCLB.508535.50  | tyrosine aminotransferase                                | 3,118 | 2,628E-132 |
| TcCLB.506789.280 | methylthioadenosine phosphorylase, putative              | 3,112 | 2,344E-146 |
| TcCLB.511367.240 | argonaute-like protein, putative                         | 3,107 | 3,26E-211  |
| TcCLB.509179.100 | L-galactonolactone oxidase (ALO)                         | 3,1   | 1,066E-176 |
| TcCLB.508823.10  | hypothetical protein, conserved                          | 3,099 | 1,846E-153 |
| TcCLB.511479.39  | hypothetical protein, conserved                          | 3,098 | 5,096E-81  |
| TcCLB.506931.4   | hypothetical protein, conserved                          | 3,096 | 5,433E-196 |
| TcCLB.503837.20  | amino acid transporter, putative                         | 3,088 | 9,659E-155 |
| TcCLB.503713.30  | 6-phosphogluconolactonase, putative                      | 3,081 | 7,013E-127 |
| TcCLB.503415.40  | hypothetical protein                                     | 3,08  | 2,543E-74  |
| TcCLB.504933.10  | calpain-like cysteine peptidase, putative                | 3,079 | 3,328E-66  |
| TcCLB.511807.220 | hypothetical protein                                     | 3,075 | 1,38E-101  |
| TcCLB.511825.240 | hypothetical protein, conserved                          | 3,058 | 3,803E-71  |
| TcCLB.503617.10  | protein kinase, putative                                 | 3,057 | 4,258E-187 |
| TcCLB.506243.10  | retrotransposon hot spot protein (RHS, pseudogene), puta | 3,056 | 3,433E-127 |
| TcCLB.507031.90  | arginase, putative                                       | 3,051 | 1,866E-167 |
| TcCLB.510437.40  | cytosolic malate dehydrogenase, putative                 | 3,047 | 5,952E-165 |
| TcCLB.504137.100 | hypothetical protein, conserved                          | 3,045 | 9,297E-161 |
| TcCLB.509207.90  | pyrroline-5-carboxylate reductase, putative (P5CR)       | 3,04  | 7,075E-208 |
| TcCLB.511325.40  | amino acid permease, putative                            | 3,04  | 2,262E-170 |
| TcCLB.503975.100 | Present in the outer mitochondrial membrane proteome 2   | 3,04  | 2,313E-122 |
| TcCLB.509997.10  | hypothetical protein, conserved                          | 3,04  | 2,218E-46  |
| TcCLB.509767.170 | hypothetical protein, conserved                          | 3,038 | 1,208E-225 |
| TcCLB.506773.44  | cytochrome b5, putative                                  | 3,037 | 1,04E-154  |
| TcCLB.506863.30  | hypothetical protein, conserved                          | 3,037 | 1,286E-67  |
| TcCLB.508823.20  | hypothetical protein, conserved                          | 3,032 | 4,67E-243  |
| TcCLB.509141.40  | Mitochondrial outer membrane protein porin, putative (VI | 3,029 | 2,21E-124  |

|                  |                                                           |       |            |
|------------------|-----------------------------------------------------------|-------|------------|
| TcCLB.508805.80  | short chain dehydrogenase, putative                       | 3,026 | 7,205E-98  |
| TcCLB.507603.220 | hypothetical protein                                      | 3,023 | 1,477E-86  |
| TcCLB.508811.40  | hypothetical protein                                      | 3,018 | 5,626E-125 |
| TcCLB.510187.20  | tyrosine aminotransferase, putative                       | 3,011 | 3,08E-227  |
| TcCLB.510187.100 | glucokinase                                               | 3,004 | 8,632E-154 |
| TcCLB.473111.10  | lathosterol oxidase, putative                             | 3,004 | 2,948E-88  |
| TcCLB.503975.40  | hypothetical protein, conserved                           | 3,003 | 7,502E-151 |
| TcCLB.509043.10  | tyrosine aminotransferase (pseudogene), putative          | 3,002 | 2,6E-155   |
| TcCLB.506893.100 | UMP-CMP kinase, mitochondrial, putative                   | 3,002 | 8,299E-86  |
| TcCLB.503445.9   | retrotransposon hot spot (RHS) protein, putative          | 2,997 | 1,953E-94  |
| TcCLB.510669.49  | Gim5A protein, putative                                   | 2,992 | 5,843E-151 |
| TcCLB.509463.30  | 3-ketoacyl-CoA thiolase, putative                         | 2,989 | 4,092E-276 |
| TcCLB.510339.80  | hypothetical protein, conserved                           | 2,983 | 3,748E-276 |
| TcCLB.511329.10  | Calpain-like protein 2 (CALP2)                            | 2,979 | 7,27E-136  |
| TcCLB.503653.60  | cytochrome b-domain protein, putative                     | 2,979 | 1,015E-88  |
| TcCLB.510565.11  | tyrosine aminotransferase, putative (fragment)            | 2,978 | 2,973E-210 |
| TcCLB.506399.80  | hypothetical protein, conserved                           | 2,968 | 3,078E-97  |
| TcCLB.510609.70  | protein kinase, putative                                  | 2,967 | 1,42E-185  |
| TcCLB.511047.70  | hypothetical protein, conserved                           | 2,959 | 1,03E-207  |
| TcCLB.506011.10  | hypothetical protein, conserved                           | 2,958 | 2,203E-131 |
| TcCLB.509129.10  | Mitochondrial outer membrane protein porin, putative (VI  | 2,955 | 1,325E-213 |
| TcCLB.507101.10  | amino acid permease, putative                             | 2,953 | 1,022E-183 |
| TcCLB.509961.9   | cytochrome c oxidase subunit 10, putative                 | 2,95  | 7,879E-153 |
| TcCLB.507247.14  | dispersed gene family protein 1 (DGF-1), putative (fragme | 2,945 | 4,999E-77  |
| TcCLB.507963.20  | arginase, putative                                        | 2,934 | 3,941E-140 |
| TcCLB.511245.140 | fatty acid elongase, putative                             | 2,924 | 5,145E-156 |
| TcCLB.508741.50  | mucin TcSMUGS, putative                                   | 2,919 | 2,423E-264 |
| TcCLB.509331.74  | hypothetical protein, conserved                           | 2,919 | 2,735E-77  |
| TcCLB.504087.20  | hypothetical protein                                      | 2,904 | 6,306E-225 |
| TcCLB.506563.180 | calpain-like cysteine peptidase (pseudogene), putative    | 2,896 | 7,938E-140 |
| TcCLB.511911.90  | hypothetical protein, conserved                           | 2,887 | 9,267E-157 |
| TcCLB.510977.9   | hypothetical protein, conserved (fragment)                | 2,887 | 3,846E-127 |
| TcCLB.505789.20  | hypothetical protein, conserved                           | 2,886 | 9,267E-157 |
| TcCLB.509197.20  | cation transporter, putative                              | 2,872 | 9,133E-09  |
| TcCLB.508643.20  | hypothetical protein, conserved                           | 2,869 | 1,544E-122 |
| TcCLB.506325.10  | retrotransposon hot spot (RHS) protein, putative          | 2,869 | 3,002E-72  |
| TcCLB.504045.55  | hypothetical protein, conserved                           | 2,868 | 4,62E-202  |
| TcCLB.508651.20  | cytochrome c oxidase subunit 10, putative                 | 2,86  | 3,762E-142 |
| TcCLB.508675.29  | calpain-like cysteine peptidase, putative                 | 2,86  | 1,71E-131  |
| TcCLB.505945.20  | ribonuclease mar1, putative                               | 2,855 | 1,078E-124 |
| TcCLB.506221.110 | chromosomal passenger protein, putative (CPC2)            | 2,85  | 5,778E-86  |
| TcCLB.508799.290 | hypothetical protein, conserved (fragment)                | 2,847 | 6,142E-155 |
| TcCLB.506459.60  | retrotransposon hot spot protein (RHS, pseudogene), puta  | 2,846 | 4,436E-92  |
| TcCLB.506593.60  | nicotinamidase, putative (PNC1)                           | 2,845 | 2,8E-179   |
| TcCLB.507527.50  | cation transporter, putative                              | 2,844 | 2,134E-09  |

|                  |                                                               |       |            |
|------------------|---------------------------------------------------------------|-------|------------|
| TcCLB.509641.79  | hypothetical protein, conserved (fragment)                    | 2,843 | 1,446E-83  |
| TcCLB.506213.50  | prostaglandin F synthase (pseudogene), putative (PGFS)        | 2,842 | 1,783E-115 |
| TcCLB.504033.80  | hypothetical protein, conserved                               | 2,841 | 2,452E-243 |
| TcCLB.509505.50  | 10 kDa heat shock protein, putative                           | 2,84  | 8,381E-100 |
| TcCLB.508999.250 | calpain-like cysteine peptidase (pseudogene), putative        | 2,837 | 4,967E-202 |
| TcCLB.506621.30  | ribonucleoside-diphosphate reductase small chain, putative    | 2,829 | 8,698E-157 |
| TcCLB.509197.10  | cation transporter, putative                                  | 2,826 | 5,166E-09  |
| TcCLB.509965.330 | hypothetical protein, conserved                               | 2,821 | 1,281E-252 |
| TcCLB.504203.40  | hypothetical protein, conserved                               | 2,818 | 5,069E-180 |
| TcCLB.506661.20  | fatty acid elongase, putative                                 | 2,818 | 2,841E-122 |
| TcCLB.506983.48  | calpain-like cysteine peptidase, putative                     | 2,816 | 6,989E-72  |
| TcCLB.509611.180 | peptide methionine sulfoxide reductase, putative              | 2,813 | 5,532E-82  |
| TcCLB.509059.50  | pyridoxal kinase, putative                                    | 2,809 | 1,499E-174 |
| TcCLB.508863.10  | hypothetical protein, conserved                               | 2,801 | 4,791E-140 |
| TcCLB.504223.10  | amino acid permease, putative                                 | 2,797 | 1,324E-163 |
| TcCLB.506199.20  | hypothetical protein, conserved                               | 2,795 | 3,424E-57  |
| TcCLB.509203.40  | glycosomal membrane protein, putative                         | 2,793 | 1,168E-236 |
| TcCLB.508799.150 | nucleoside transporter-like, putative                         | 2,792 | 5,552E-133 |
| TcCLB.507515.4   | trypanothione/tryparedoxin dependent peroxidase 2, putative   | 2,786 | 1,6E-188   |
| TcCLB.506529.360 | cytochrome oxidase subunit IV, putative (COXIV)               | 2,783 | 8,685E-289 |
| TcCLB.506931.10  | haloacid dehalogenase-like hydrolase, putative                | 2,783 | 5,101E-92  |
| TcCLB.506177.100 | actyltransferase-like, putative                               | 2,782 | 6,666E-76  |
| TcCLB.509237.120 | calpain-like cysteine peptidase, putative                     | 2,778 | 1,63E-209  |
| TcCLB.508719.30  | hypothetical protein, conserved                               | 2,771 | 2,774E-205 |
| TcCLB.504013.60  | regulatory subunit of protein kinase a-like protein, putative | 2,767 | 2,894E-113 |
| TcCLB.508501.250 | UMP-CMP kinase, mitochondrial, putative                       | 2,767 | 7,197E-85  |
| TcCLB.508827.50  | DNA repair and recombination helicase protein PIF3, putative  | 2,764 | 9,058E-139 |
| TcCLB.508999.200 | cysteine peptidase, Clan CA, family C2, putative              | 2,763 | 3,053E-120 |
| TcCLB.510521.10  | NADH-cytochrome b5 reductase (pseudogene), putative           | 2,758 | 1,116E-114 |
| TcCLB.470399.10  | cyclophilin, putative (fragment)                              | 2,75  | 6,493E-58  |
| TcCLB.511437.30  | lipase, putative                                              | 2,749 | 4,602E-75  |
| TcCLB.508823.70  | P27 protein, putative (P27)                                   | 2,746 | 0          |
| TcCLB.506853.50  | 2-oxoisovalerate dehydrogenase alpha subunit, putative        | 2,742 | 2,278E-148 |
| TcCLB.504223.30  | hypothetical protein, conserved (fragment)                    | 2,739 | 2,649E-21  |
| TcCLB.511575.30  | hypothetical protein, conserved                               | 2,735 | 1,096E-108 |
| TcCLB.506201.39  | 25 kDa translation elongation factor 1-beta, putative (EF-1)  | 2,734 | 1,003E-286 |
| TcCLB.510121.20  | hexokinase, putative                                          | 2,727 | 2,384E-197 |
| TcCLB.503861.10  | retrotransposon hot spot (RHS) protein, putative              | 2,724 | 9,773E-191 |
| TcCLB.508387.20  | methylthioadenosine phosphorylase, putative                   | 2,717 | 7,478E-107 |
| TcCLB.510629.460 | hypothetical protein                                          | 2,713 | 6,238E-136 |
| TcCLB.510879.50  | regulatory subunit of protein kinase a-like protein, putative | 2,71  | 2,538E-207 |
| TcCLB.511697.40  | hypothetical protein, conserved (pseudogene)                  | 2,709 | 6,313E-48  |
| TcCLB.509295.80  | retrotransposon hot spot (RHS) protein, putative              | 2,706 | 3,036E-126 |
| TcCLB.507707.20  | hypothetical protein, conserved                               | 2,704 | 4,362E-97  |
| TcCLB.510905.10  | dispersed gene family protein 1 (DGF-1), putative             | 2,703 | 1,296E-13  |

|                  |                                                         |       |            |
|------------------|---------------------------------------------------------|-------|------------|
| TcCLB.510101.140 | pyruvate phosphate dikinase, putative                   | 2,701 | 4,81E-116  |
| TcCLB.506773.90  | amino acid permease/transporter, putative               | 2,7   | 3,06E-161  |
| TcCLB.508677.80  | NADP-dependent alcohol hydrogenase, putative            | 2,696 | 3,13E-88   |
| TcCLB.511245.180 | guanin nucleotide-binding protein, putative             | 2,695 | 2,012E-128 |
| TcCLB.506319.60  | hypothetical protein, conserved                         | 2,689 | 1,197E-76  |
| TcCLB.508601.141 | dipeptidyl-peptidase, putative (fragment)               | 2,688 | 9,123E-204 |
| TcCLB.510783.49  | cytochrome c oxidase subunit 10, putative               | 2,685 | 3,048E-30  |
| TcCLB.510259.50  | 21 kDa cyclophilin, putative (CYP21)                    | 2,684 | 7,251E-108 |
| TcCLB.511135.20  | hypothetical protein, conserved                         | 2,679 | 1,797E-211 |
| TcCLB.511389.110 | cytochrome c oxidase VIII (COX VIII), putative          | 2,675 | 2,213E-150 |
| TcCLB.510741.10  | cystathione gamma lyase, putative                       | 2,673 | 4,737E-52  |
| TcCLB.508677.50  | beta galactofuranosyl glycosyltransferase, putative     | 2,669 | 1,167E-92  |
| TcCLB.508699.120 | dipeptidyl-peptidase, putative                          | 2,667 | 3,325E-254 |
| TcCLB.510565.20  | fatty acid desaturase, putative                         | 2,665 | 8,004E-124 |
| TcCLB.503791.30  | hypothetical protein, conserved                         | 2,66  | 6,426E-200 |
| TcCLB.506635.60  | pyroglutamyl-peptidase I, putative (PPI)                | 2,658 | 5,814E-116 |
| TcCLB.511325.50  | amino acid permease, putative                           | 2,657 | 9,851E-47  |
| TcCLB.503393.10  | amino acid permease, putative (fragment)                | 2,657 | 1,945E-39  |
| TcCLB.506219.40  | hypothetical protein, conserved                         | 2,654 | 2,392E-207 |
| TcCLB.509053.30  | hypothetical protein, conserved                         | 2,652 | 7,425E-174 |
| TcCLB.509719.40  | cytochrome P450, putative                               | 2,652 | 8,804E-89  |
| TcCLB.506857.20  | pyrroline-5-carboxylate reductase, putative (P5CR)      | 2,65  | 2,046E-97  |
| TcCLB.509601.140 | hypothetical protein                                    | 2,648 | 4,422E-194 |
| TcCLB.507677.160 | hypothetical protein, conserved                         | 2,639 | 1,711E-154 |
| TcCLB.507167.70  | retrotransposon hot spot (RHS) protein, putative        | 2,639 | 5,574E-101 |
| TcCLB.508303.10  | alanine racemase 2, putative                            | 2,636 | 1,126E-140 |
| TcCLB.506779.200 | glycerol-3-phosphate dehydrogenase (pseudogene), putat  | 2,628 | 6,654E-188 |
| TcCLB.506947.10  | hypothetical protein, conserved                         | 2,625 | 6,124E-127 |
| TcCLB.508821.40  | hypothetical protein, conserved                         | 2,622 | 2,471E-222 |
| TcCLB.510943.50  | delta-1-pyrroline-5-carboxylate dehydrogenase, putative | 2,619 | 5,032E-135 |
| TcCLB.506753.140 | hypothetical protein, conserved                         | 2,619 | 2,482E-88  |
| TcCLB.508955.20  | hypothetical protein, conserved                         | 2,618 | 3,544E-163 |
| TcCLB.503769.40  | cytochrome oxidase subunit VII (COXVII)                 | 2,618 | 1,35E-160  |
| TcCLB.509199.24  | ribose 5-phosphate isomerase type B                     | 2,617 | 1,02E-100  |
| TcCLB.510357.40  | hypothetical protein, conserved                         | 2,609 | 1,622E-57  |
| TcCLB.509683.90  | hypothetical protein                                    | 2,606 | 1,968E-86  |
| TcCLB.505373.10  | retrotransposon hot spot (RHS) protein, putative        | 2,603 | 2,095E-100 |
| TcCLB.509331.210 | NADP-dependent alcohol hydrogenase, putative            | 2,602 | 2,758E-59  |
| TcCLB.511545.80  | L-Lysine transport protein                              | 2,598 | 6,486E-119 |
| TcCLB.506529.508 | glucose-6-phosphate isomerase, glycosomal, putative     | 2,596 | 1,231E-153 |
| TcCLB.506925.300 | cyclophilin a, putative (CYPA)                          | 2,591 | 6,11E-102  |
| TcCLB.506563.210 | cysteine peptidase, Clan CA, family C2, putative        | 2,59  | 2,306E-272 |
| TcCLB.508951.20  | hexokinase, putative                                    | 2,589 | 9,055E-171 |
| TcCLB.506203.60  | hypothetical protein, conserved                         | 2,586 | 2,962E-73  |
| TcCLB.509793.50  | hypothetical protein, conserved                         | 2,584 | 1,922E-183 |

|                  |                                                           |       |            |
|------------------|-----------------------------------------------------------|-------|------------|
| TcCLB.511207.10  | hypothetical protein, conserved                           | 2,583 | 2,811E-128 |
| TcCLB.507105.50  | hypothetical protein                                      | 2,581 | 3,651E-216 |
| TcCLB.511811.30  | hypothetical protein, conserved                           | 2,579 | 4,554E-92  |
| TcCLB.510739.19  | cystathione gamma lyase, putative (fragment)              | 2,577 | 3,062E-37  |
| TcCLB.504081.220 | retrotransposon hot spot protein (RHS, pseudogene), puta  | 2,571 | 4,637E-85  |
| TcCLB.508535.10  | NADH-dependent fumarate reductase, putative               | 2,569 | 1,214E-285 |
| TcCLB.507129.5   | hypothetical protein, conserved (fragment)                | 2,569 | 4,383E-25  |
| TcCLB.508029.10  | Hydroxymethylglutaryl-CoA lyase, mitochondrial, putative  | 2,568 | 1,926E-74  |
| TcCLB.511691.39  | hypothetical protein, conserved                           | 2,562 | 6,659E-190 |
| TcCLB.510605.10  | hypothetical protein, conserved                           | 2,562 | 4,557E-87  |
| TcCLB.507709.90  | sterol C-24 reductase, putative                           | 2,559 | 1,99E-90   |
| TcCLB.509197.39  | cation transporter, putative                              | 2,556 | 2,651E-140 |
| TcCLB.504867.70  | cytochrome c oxidase assembly protein, putative           | 2,552 | 2,073E-115 |
| TcCLB.509589.20  | squalene monooxygenase, putative                          | 2,551 | 8,386E-132 |
| TcCLB.504339.19  | NADP-dependent alcohol hydrogenase, putative              | 2,55  | 5,495E-12  |
| TcCLB.508701.20  | cation transporter, putative                              | 2,537 | 4,421E-07  |
| TcCLB.511333.10  | calpain-like cysteine peptidase, putative                 | 2,529 | 3,909E-23  |
| TcCLB.510265.10  | quinone oxidoreductase, putative                          | 2,528 | 1,303E-81  |
| TcCLB.508241.10  | glycerol-3-phosphate dehydrogenase, putative              | 2,525 | 1,448E-119 |
| TcCLB.506843.100 | retrotransposon hot spot (RHS) protein, putative          | 2,523 | 1,137E-169 |
| TcCLB.506529.80  | hypothetical protein, conserved                           | 2,52  | 9,334E-163 |
| TcCLB.508027.129 | Hydroxymethylglutaryl-CoA lyase, mitochondrial, putative  | 2,502 | 1,854E-44  |
| TcCLB.506147.9   | prostaglandin F2alpha synthase (TcPGFS)                   | 2,501 | 9,529E-238 |
| TcCLB.507867.100 | hypothetical protein                                      | 2,498 | 4,304E-123 |
| TcCLB.508033.39  | mucin-associated surface protein (MASP, pseudogene), pi   | 2,497 | 6,138E-54  |
| TcCLB.507559.80  | deoxyribose-phosphate aldolase, putative                  | 2,494 | 1,522E-187 |
| TcCLB.510245.10  | amino acid permease, putative                             | 2,492 | 4,773E-166 |
| TcCLB.509351.10  | delta-1-pyrroline-5-carboxylate dehydrogenase, putative   | 2,492 | 1,445E-54  |
| TcCLB.508799.160 | cytochrome b5-like protein, putative                      | 2,49  | 5,544E-160 |
| TcCLB.506181.104 | actyltransferase-like protein                             | 2,49  | 2,316E-86  |
| TcCLB.507049.60  | NAD(P)-dependent oxidoreductase, putative                 | 2,489 | 7,022E-129 |
| TcCLB.505057.20  | hypothetical protein                                      | 2,482 | 5,358E-61  |
| TcCLB.505807.180 | 2-hydroxy-3-oxopropionate reductase, putative             | 2,474 | 5,846E-159 |
| TcCLB.509331.70  | 3-oxo-5-alpha-steroid 4-dehydrogenase, putative           | 2,471 | 8,571E-90  |
| TcCLB.511613.100 | elongation factor 1-gamma (EF-1-gamma), putative          | 2,469 | 2,701E-06  |
| TcCLB.509705.10  | cellulosomal scaffoldin anchoring protein, putative       | 2,464 | 8,133E-91  |
| TcCLB.506983.39  | calpain-like cysteine peptidase, putative                 | 2,458 | 2,85E-76   |
| TcCLB.507081.130 | 2,4-dihydroxyhept-2-ene-1,7-dioic acid aldolase, putative | 2,457 | 1,887E-96  |
| TcCLB.505171.30  | hypothetical protein, conserved                           | 2,456 | 7,47E-95   |
| TcCLB.450161.10  | cation transporter, putative                              | 2,455 | 5,829E-116 |
| TcCLB.508781.110 | 2-oxoisovalerate dehydrogenase alpha subunit, putative    | 2,453 | 4,741E-93  |
| TcCLB.506975.40  | amidohydrolase, putative                                  | 2,449 | 8,12E-154  |
| TcCLB.511335.9   | calpain-like cysteine peptidase, putative (fragment)      | 2,445 | 4,191E-26  |
| TcCLB.504105.220 | hypothetical protein, conserved                           | 2,44  | 8,007E-51  |
| TcCLB.482097.20  | hypothetical protein, conserved                           | 2,438 | 2,16E-09   |



|                  |                                                            |       |            |
|------------------|------------------------------------------------------------|-------|------------|
| TcCLB.509045.20  | co-chaperone GrpE, putative                                | 2,437 | 6,755E-127 |
| TcCLB.511867.140 | Acyl carrier protein, mitochondrial, putative (ACP)        | 2,434 | 3,259E-121 |
| TcCLB.507517.60  | ATPase subunit 9, putative                                 | 2,43  | 2,061E-98  |
| TcCLB.509233.150 | cytochrome oxidase subunit VII (COXVII)                    | 2,428 | 9,581E-147 |
| TcCLB.509395.100 | cytochrome b-domain protein, putative                      | 2,423 | 3,009E-56  |
| TcCLB.509179.20  | Macro domain containing protein, putative                  | 2,422 | 4,471E-102 |
| TcCLB.507317.34  | hypothetical protein, conserved                            | 2,422 | 7,637E-79  |
| TcCLB.508173.150 | protein disulfide isomerase, putative                      | 2,415 | 2,098E-98  |
| TcCLB.509265.10  | retrotransposon hot spot (RHS) protein, putative           | 2,415 | 3,111E-76  |
| TcCLB.508873.420 | Present in the outer mitochondrial membrane proteome 1     | 2,414 | 1,105E-110 |
| TcCLB.484311.10  | calpain-like cysteine peptidase, putative (fragment)       | 2,412 | 9,136E-13  |
| TcCLB.441401.10  | imidazolonepropionase, putative                            | 2,407 | 1,564E-81  |
| TcCLB.503899.119 | trypanothione/tryparedoxin dependent peroxidase 2, puta    | 2,406 | 9,94E-126  |
| TcCLB.508461.80  | prostaglandin F2alpha synthase (TcPGFS)                    | 2,402 | 7,837E-234 |
| TcCLB.508257.220 | expression site-associated gene (ESAG-like) protein, putat | 2,4   | 2,037E-103 |
| TcCLB.503753.29  | NADPH--cytochrome P450 reductase, putative                 | 2,399 | 5,094E-97  |
| TcCLB.509769.40  | hypothetical protein, conserved                            | 2,398 | 1,993E-87  |
| TcCLB.505193.100 | Present in the outer mitochondrial membrane proteome 1     | 2,396 | 1,754E-40  |
| TcCLB.506169.21  | retrotransposon hot spot (RHS) protein, putative (fragmer  | 2,39  | 3,46E-30   |
| TcCLB.503697.70  | hypothetical protein, conserved                            | 2,388 | 9,672E-78  |
| TcCLB.510507.20  | 3-ketoacyl-CoA thiolase, putative                          | 2,387 | 7,284E-166 |
| TcCLB.503461.20  | per-hexamer repeat protein 5, putative                     | 2,386 | 1,001E-73  |
| TcCLB.438313.9   | dispersed gene family protein 1 (DGF-1), putative          | 2,383 | 4,2E-71    |
| TcCLB.508897.119 | FKBP-type peptidylprolyl cis-trans isomerase, putative     | 2,382 | 3,612E-98  |
| TcCLB.508045.100 | mitochondrial DNA primase, putative (PRI1)                 | 2,379 | 2,326E-116 |
| TcCLB.506789.130 | double-strand-break repair protein rad21 homolog, putati   | 2,377 | 5,913E-181 |
| TcCLB.509137.30  | imidazolonepropionase, putative                            | 2,375 | 7,925E-147 |
| TcCLB.504983.10  | hypothetical protein                                       | 2,375 | 3,269E-81  |
| TcCLB.506417.5   | endoribonuclease L-PSP (pb5), putative                     | 2,371 | 6,94E-110  |
| TcCLB.510063.30  | hypothetical protein, conserved                            | 2,371 | 1,145E-98  |
| TcCLB.509799.50  | hypothetical protein, conserved                            | 2,369 | 3,808E-103 |
| TcCLB.511573.20  | hypothetical protein                                       | 2,367 | 5,378E-173 |
| TcCLB.508741.140 | imidazolonepropionase, putative                            | 2,361 | 1,13E-147  |
| TcCLB.510517.40  | hypothetical protein                                       | 2,361 | 4,968E-98  |
| TcCLB.503991.39  | 2,4-dihydroxyhept-2-ene-1,7-dioic acid aldolase, putative  | 2,36  | 5,614E-68  |
| TcCLB.511145.10  | cytochrome c oxidase subunit VI, putative                  | 2,357 | 1,93E-65   |
| TcCLB.511827.100 | cysteine peptidase C (CPC), putative (TCCB)                | 2,35  | 1,074E-87  |
| TcCLB.507929.20  | co-chaperone GrpE, putative                                | 2,344 | 4,743E-95  |
| TcCLB.509331.30  | acetyl-CoA synthetase, putative                            | 2,344 | 1,647E-75  |
| TcCLB.509979.150 | nitrilase, putative                                        | 2,343 | 5,782E-88  |
| TcCLB.506325.40  | retrotransposon hot spot protein (RHS, pseudogene), puta   | 2,332 | 2,283E-120 |
| TcCLB.508647.180 | hypothetical protein, conserved                            | 2,331 | 5,552E-103 |
| TcCLB.504257.60  | S-adenosylmethionine decarboxylase proenzyme, putative     | 2,33  | 8,524E-34  |
| TcCLB.506297.190 | pyruvate phosphate dikinase, putative                      | 2,328 | 1,596E-116 |
| TcCLB.507617.9   | prostaglandin F2alpha synthase (TcPGFS)                    | 2,326 | 8,586E-209 |

|                  |                                                          |       |            |
|------------------|----------------------------------------------------------|-------|------------|
| TcCLB.507611.280 | cytochrome oxidase subunit IX, putative (COXIX)          | 2,325 | 3,816E-102 |
| TcCLB.509587.20  | squalene monooxygenase, putative (fragment)              | 2,316 | 7,218E-84  |
| TcCLB.511017.50  | glycosomal membrane protein, putative                    | 2,313 | 5,235E-105 |
| TcCLB.504069.20  | cytochrome c oxidase subunit VI, putative                | 2,313 | 4,009E-81  |
| TcCLB.509215.40  | peptidyl-prolyl cis-trans isomerase, putative            | 2,305 | 2,736E-124 |
| TcCLB.428403.10  | hypothetical protein (fragment)                          | 2,3   | 7,877E-06  |
| TcCLB.503579.70  | ATPase subunit 9, putative                               | 2,298 | 6,957E-87  |
| TcCLB.506853.10  | hypothetical protein, conserved                          | 2,297 | 9,191E-154 |
| TcCLB.507875.20  | glutamate dehydrogenase, putative                        | 2,297 | 1,576E-52  |
| TcCLB.507837.20  | protein kinase, putative                                 | 2,296 | 2,639E-84  |
| TcCLB.511639.20  | hypothetical protein, conserved                          | 2,292 | 4,994E-149 |
| TcCLB.508699.130 | cation transporter, putative (fragment)                  | 2,287 | 2,982E-81  |
| TcCLB.508555.50  | calpain-like cysteine peptidase, putative                | 2,286 | 1,589E-63  |
| TcCLB.510729.110 | meiotic recombination protein DMC1, putative (dmc1)      | 2,285 | 1,39E-119  |
| TcCLB.509267.30  | hypothetical protein, conserved                          | 2,282 | 1,558E-32  |
| TcCLB.507219.20  | retrotransposon hot spot protein (RHS, pseudogene), puta | 2,28  | 4,865E-87  |
| TcCLB.506467.29  | methyltransferase domain containing protein, putative (P | 2,276 | 1,888E-106 |
| TcCLB.509787.10  | retrotransposon hot spot (RHS) protein, putative         | 2,276 | 9,327E-104 |
| TcCLB.511393.49  | hypothetical protein, conserved                          | 2,276 | 2,91E-63   |
| TcCLB.510131.44  | hypothetical protein, conserved                          | 2,27  | 3,158E-104 |
| TcCLB.509703.10  | cellulosomal scaffoldin anchoring protein, putative      | 2,264 | 1,811E-74  |
| TcCLB.511545.90  | hypothetical protein                                     | 2,259 | 4,937E-79  |
| TcCLB.510101.80  | hypothetical protein, conserved                          | 2,258 | 1,327E-68  |
| TcCLB.507711.200 | hypothetical protein, conserved                          | 2,256 | 3,465E-281 |
| TcCLB.508555.20  | hypothetical protein, conserved                          | 2,255 | 1,588E-48  |
| TcCLB.455721.9   | cytochrome c oxidase subunit 10, putative                | 2,253 | 1,924E-55  |
| TcCLB.503855.40  | calpain-like cysteine peptidase, putative                | 2,251 | 7,301E-71  |
| TcCLB.506183.70  | beta galactofuranosyl glycosyltransferase, putative      | 2,25  | 1,329E-67  |
| TcCLB.511309.60  | hypothetical protein, conserved                          | 2,25  | 1,655E-52  |
| TcCLB.510769.10  | hypothetical protein, conserved                          | 2,245 | 3,497E-64  |
| TcCLB.507723.100 | cytochrome oxidase subunit IX, putative (COXIX)          | 2,243 | 2,107E-87  |
| TcCLB.510977.20  | hypothetical protein, conserved (pseudogene)             | 2,239 | 1,078E-60  |
| TcCLB.507739.40  | uracil phosphoribosyltransferase, putative               | 2,237 | 3,666E-104 |
| TcCLB.503577.9   | delta-1-pyrroline-5-carboxylate dehydrogenase (pseudoge  | 2,236 | 1,405E-45  |
| TcCLB.510069.20  | protein associated with differentiation 4, putative      | 2,235 | 4,018E-126 |
| TcCLB.510309.20  | MFS transporter, putative                                | 2,233 | 5,071E-96  |
| TcCLB.508153.740 | hypothetical protein                                     | 2,229 | 1,144E-93  |
| TcCLB.508549.20  | hypothetical protein, conserved                          | 2,227 | 2,161E-132 |
| TcCLB.509223.20  | retrotransposon hot spot (RHS) protein, putative         | 2,227 | 6,007E-98  |
| TcCLB.510795.30  | fatty acid desaturase (pseudogene), putative             | 2,226 | 4,634E-79  |
| TcCLB.503999.10  | squalene monooxygenase, putative                         | 2,225 | 4,669E-120 |
| TcCLB.504005.54  | hypothetical protein, conserved                          | 2,225 | 8,256E-51  |
| TcCLB.511639.9   | hypothetical protein, conserved                          | 2,224 | 1,562E-66  |
| TcCLB.503989.30  | hypothetical protein, conserved (pseudogene)             | 2,223 | 3,664E-150 |
| TcCLB.508471.19  | hypothetical protein, conserved (fragment)               | 2,223 | 1,324E-104 |

|                  |                                                          |       |            |
|------------------|----------------------------------------------------------|-------|------------|
| TcCLB.509329.20  | retrotransposon hot spot protein (RHS, pseudogene), puta | 2,223 | 1,174E-82  |
| TcCLB.506625.230 | hypothetical protein, conserved                          | 2,216 | 2,139E-43  |
| TcCLB.509023.70  | hypothetical protein, conserved                          | 2,211 | 2,948E-22  |
| TcCLB.510943.130 | cytochrome c oxidase assembly protein, putative          | 2,21  | 7,03E-87   |
| TcCLB.510749.99  | aminopeptidase P, putative                               | 2,208 | 1,821E-26  |
| TcCLB.511151.90  | glycerol-3-phosphate dehydrogenase, putative             | 2,204 | 6,41E-149  |
| TcCLB.506505.30  | hypothetical protein, conserved                          | 2,201 | 2,827E-92  |
| TcCLB.511903.40  | 3-hydroxy-3-methylglutaryl-CoA synthase, putative (HMG5  | 2,196 | 2,367E-139 |
| TcCLB.504069.120 | amino acid permease 24, putative (AAP24)                 | 2,194 | 4,418E-58  |
| TcCLB.507771.70  | hypothetical protein, conserved                          | 2,192 | 1,172E-104 |
| TcCLB.505647.40  | endoribonuclease L-PSP (pb5), putative                   | 2,19  | 7,124E-164 |
| TcCLB.509937.200 | hypothetical protein, conserved                          | 2,184 | 1,097E-57  |
| TcCLB.508221.414 | elongation factor 1-gamma (EF-1-gamma), putative         | 2,181 | 2,726E-06  |
| TcCLB.506945.190 | cytochrome p450-like protein, putative                   | 2,171 | 7,176E-127 |
| TcCLB.509427.50  | retrotransposon hot spot protein (RHS, pseudogene), puta | 2,171 | 2,574E-77  |
| TcCLB.510747.10  | hypothetical protein, conserved                          | 2,171 | 1,273E-55  |
| TcCLB.508799.120 | amino acid permease/transporter, putative                | 2,166 | 2,232E-86  |
| TcCLB.508567.60  | hypothetical protein                                     | 2,165 | 1,454E-80  |
| TcCLB.505647.60  | hypothetical protein, conserved                          | 2,164 | 2,056E-83  |
| TcCLB.506375.110 | (H)-ATPase G subunit, putative                           | 2,159 | 1,021E-90  |
| TcCLB.509367.30  | dispersed gene family protein 1 (DGF-1, pseudogene), put | 2,159 | 7,096E-23  |
| TcCLB.506731.10  | hypothetical protein                                     | 2,158 | 4,346E-25  |
| TcCLB.510759.40  | Protein kinase domain, putative                          | 2,156 | 1,675E-99  |
| TcCLB.503745.25  | hypothetical protein, conserved                          | 2,155 | 5,954E-32  |
| TcCLB.510853.10  | dispersed gene family protein 1 (DGF-1, pseudogene), put | 2,146 | 4,766E-46  |
| TcCLB.503841.80  | NADH-dependent fumarate reductase, putative              | 2,145 | 2,531E-31  |
| TcCLB.507115.20  | dispersed gene family protein 1 (DGF-1), putative        | 2,141 | 5,574E-42  |
| TcCLB.508147.159 | dispersed gene family protein 1 (DGF-1), putative        | 2,141 | 1,16E-09   |
| TcCLB.511575.130 | folate/pteridine transporter, putative                   | 2,14  | 3,965E-90  |
| TcCLB.509287.230 | trans-sialidase, Group II, putative                      | 2,139 | 1,446E-87  |
| TcCLB.511277.500 | hypothetical protein, conserved                          | 2,136 | 1,099E-69  |
| TcCLB.510143.24  | Hsc70-interacting protein (Hip), putative                | 2,126 | 1,753E-134 |
| TcCLB.508023.80  | retrotransposon hot spot protein (RHS, pseudogene), puta | 2,126 | 1,355E-42  |
| TcCLB.503975.70  | hypothetical protein, conserved                          | 2,124 | 8,023E-90  |
| TcCLB.508971.40  | acetylornithine deacetylase-like, putative               | 2,123 | 6,654E-180 |
| TcCLB.510301.30  | hypothetical protein, conserved                          | 2,121 | 2,745E-61  |
| TcCLB.507671.30  | 25 kDa translation elongation factor 1-beta (EF-1-beta)  | 2,12  | 1,012E-125 |
| TcCLB.507515.90  | hypothetical protein, conserved                          | 2,119 | 1,056E-61  |
| TcCLB.503453.100 | serine palmitoyltransferase, putative                    | 2,115 | 4,632E-96  |
| TcCLB.506999.180 | hypothetical protein                                     | 2,114 | 1,201E-106 |
| TcCLB.508465.40  | hypothetical protein, conserved                          | 2,111 | 5,428E-86  |
| TcCLB.511903.120 | transketolase, putative                                  | 2,11  | 3,094E-142 |
| TcCLB.511667.20  | retrotransposon hot spot (RHS) protein, putative         | 2,105 | 3,575E-47  |
| TcCLB.506129.89  | hypothetical protein, conserved                          | 2,104 | 1,627E-106 |
| TcCLB.507641.64  | hypothetical protein, conserved                          | 2,104 | 1,354E-83  |

|                  |                                                            |       |            |
|------------------|------------------------------------------------------------|-------|------------|
| TcCLB.510213.110 | NADH-dependent fumarate reductase, putative                | 2,103 | 2,729E-40  |
| TcCLB.508503.10  | fatty acid desaturase, putative                            | 2,1   | 1,046E-48  |
| TcCLB.511337.4   | hypothetical protein, conserved                            | 2,095 | 1,452E-21  |
| TcCLB.508059.50  | hypothetical protein, conserved                            | 2,094 | 8,163E-102 |
| TcCLB.510889.50  | cytochrome oxidase subunit IV, putative (COXIV)            | 2,093 | 3,093E-99  |
| TcCLB.506931.80  | p450 reductase, putative                                   | 2,093 | 8,484E-89  |
| TcCLB.506789.160 | hypothetical protein, conserved                            | 2,092 | 1,273E-71  |
| TcCLB.511773.10  | retrotransposon hot spot protein (RHS, pseudogene), puta   | 2,092 | 6,651E-57  |
| TcCLB.507153.30  | dispersed gene family protein 1 (DGF-1), putative          | 2,089 | 1,444E-41  |
| TcCLB.507233.110 | mismatch repair protein MSH4, putative                     | 2,088 | 6,863E-127 |
| TcCLB.508139.130 | trans-sialidase, Group II, putative                        | 2,086 | 1,581E-104 |
| TcCLB.510407.30  | hypothetical protein, conserved                            | 2,083 | 7,763E-47  |
| TcCLB.508809.40  | hypothetical protein, conserved                            | 2,083 | 2,341E-33  |
| TcCLB.506171.10  | retrotransposon hot spot (RHS) protein, putative           | 2,083 | 6,435E-27  |
| TcCLB.508231.40  | hypothetical protein, conserved                            | 2,081 | 4,147E-117 |
| TcCLB.509671.10  | hypothetical protein, conserved                            | 2,075 | 3,486E-112 |
| TcCLB.407477.50  | cytochrome c oxidase VIII (COX VIII), putative             | 2,074 | 1,145E-93  |
| TcCLB.511909.30  | hypothetical protein, conserved                            | 2,07  | 1,594E-44  |
| TcCLB.507019.20  | nitrate reductase, putative                                | 2,068 | 1,822E-108 |
| TcCLB.510105.100 | UDP-glucose dehydrogenase, putative                        | 2,066 | 5,804E-60  |
| TcCLB.510993.10  | (H)-ATPase G subunit                                       | 2,061 | 2,642E-76  |
| TcCLB.507897.20  | squalene synthase, putative                                | 2,06  | 7,56E-201  |
| TcCLB.509331.160 | hypothetical protein, conserved                            | 2,06  | 6,143E-53  |
| TcCLB.506865.2   | nucleoside phosphorylase, putative                         | 2,06  | 3,048E-45  |
| TcCLB.509003.60  | hypothetical protein, conserved                            | 2,058 | 1,02E-87   |
| TcCLB.511895.20  | hypothetical protein                                       | 2,057 | 8,64E-72   |
| TcCLB.511295.10  | FKBP-type peptidylprolyl cis-trans isomerase, putative     | 2,056 | 3,761E-74  |
| TcCLB.506391.30  | ef-hand protein 5, putative                                | 2,052 | 3,105E-47  |
| TcCLB.506773.120 | mRNA cap guanine-N7 methyltransferase, putative            | 2,051 | 7,772E-69  |
| TcCLB.511485.11  | retrotransposon hot spot protein (RHS, pseudogene), puta   | 2,051 | 1,409E-07  |
| TcCLB.510743.70  | lactoylglutathione lyase-like protein, putative            | 2,048 | 9,934E-100 |
| TcCLB.511303.64  | hypothetical protein, conserved                            | 2,045 | 4,114E-71  |
| TcCLB.511815.170 | hypothetical protein, conserved                            | 2,045 | 6,434E-60  |
| TcCLB.506811.160 | R27-2 protein, putative                                    | 2,044 | 3,252E-140 |
| TcCLB.426897.10  | hypothetical protein                                       | 2,043 | 5,291E-75  |
| TcCLB.506989.140 | Elongation factor Ts, mitochondrial, putative (EF-Ts)      | 2,042 | 3,758E-71  |
| TcCLB.511589.70  | ADP-ribosylation factor GTPase activating protein, putativ | 2,039 | 1,54E-69   |
| TcCLB.511131.80  | hypothetical protein, conserved                            | 2,035 | 1,728E-109 |
| TcCLB.509693.209 | mismatch repair protein, putative                          | 2,033 | 1,382E-58  |
| TcCLB.510861.140 | serine/threonine protein kinase, putative                  | 2,031 | 1,862E-123 |
| TcCLB.506125.20  | hypothetical protein, conserved                            | 2,029 | 1,51E-84   |
| TcCLB.509767.59  | protoheme IX farnesyltransferase, putative                 | 2,027 | 8,681E-85  |
| TcCLB.506855.310 | hypothetical protein, conserved                            | 2,026 | 1,599E-108 |
| TcCLB.511037.20  | L-2-hydroxyglutarate dehydrogenase, mitochondrial, putat   | 2,025 | 1,65E-87   |
| TcCLB.508881.70  | DNA ligase, putative                                       | 2,023 | 3,895E-93  |

|                  |                                                           |       |            |
|------------------|-----------------------------------------------------------|-------|------------|
| TcCLB.507719.9   | dispersed gene family protein 1 (DGF-1), putative         | 2,021 | 8,944E-47  |
| TcCLB.506323.30  | retrotransposon hot spot (RHS) protein, putative          | 2,019 | 1,814E-75  |
| TcCLB.510677.9   | dispersed gene family protein 1 (DGF-1), putative (fragm  | 2,018 | 1,31E-35   |
| TcCLB.503411.10  | hypothetical protein                                      | 2,015 | 5,46E-58   |
| TcCLB.511807.120 | hypothetical protein, conserved                           | 2,007 | 5,623E-73  |
| TcCLB.506355.5   | hexose transporter, putative                              | 2,007 | 1,154E-37  |
| TcCLB.504003.30  | hypothetical protein                                      | 2,006 | 1,336E-67  |
| TcCLB.504033.130 | spermidine synthase, putative                             | 2,006 | 1,236E-19  |
| TcCLB.511759.40  | hypothetical protein, conserved                           | 2,004 | 7,179E-23  |
| TcCLB.508405.70  | protein kinase, putative                                  | 2,001 | 1,147E-76  |
| TcCLB.508141.90  | hypothetical protein, conserved                           | 1,999 | 1,784E-62  |
| TcCLB.510603.169 | hypothetical protein, conserved                           | 1,997 | 1,207E-22  |
| TcCLB.507089.210 | hypothetical protein, conserved                           | 1,995 | 7,576E-71  |
| TcCLB.510971.5   | retrotransposon hot spot protein (RHS, pseudogene), puta  | 1,994 | 3,173E-46  |
| TcCLB.506885.204 | hypothetical protein, conserved                           | 1,993 | 6,928E-99  |
| TcCLB.511469.70  | prohibitin, putative                                      | 1,988 | 6,652E-91  |
| TcCLB.511485.20  | retrotransposon hot spot protein (RHS, pseudogene), puta  | 1,988 | 4,011E-28  |
| TcCLB.505207.20  | beta galactofuranosyl glycosyltransferase, putative       | 1,986 | 2,256E-20  |
| TcCLB.509029.140 | hypothetical protein, conserved                           | 1,985 | 1,086E-55  |
| TcCLB.507117.9   | dispersed gene family protein 1 (DGF-1), putative         | 1,985 | 1,188E-32  |
| TcCLB.503739.10  | beta galactofuranosyl glycosyltransferase (pseudogene), p | 1,985 | 3,159E-09  |
| TcCLB.510669.20  | Gim5A protein, putative                                   | 1,982 | 1,417E-83  |
| TcCLB.509601.59  | protoheme IX farnesyltransferase, putative                | 1,981 | 1,945E-93  |
| TcCLB.510005.41  | retrotransposon hot spot (RHS) protein, putative          | 1,98  | 5,428E-86  |
| TcCLB.511661.80  | hypothetical protein, conserved                           | 1,98  | 3,71E-48   |
| TcCLB.506263.10  | D-isomer specific 2-hydroxyacid dehydrogenase-protein, p  | 1,979 | 3,095E-138 |
| TcCLB.505971.10  | UDP-Gal or UDP-GlcNAc-dependent glycosyltransferase, p    | 1,979 | 1,541E-17  |
| TcCLB.509295.10  | dispersed gene family protein 1 (DGF-1), putative         | 1,979 | 2,192E-17  |
| TcCLB.504741.4   | hypothetical protein, conserved                           | 1,978 | 2,147E-63  |
| TcCLB.509327.10  | retrotransposon hot spot protein (RHS, pseudogene), puta  | 1,978 | 1,419E-40  |
| TcCLB.509551.30  | mitochondrial phosphate transporter, putative             | 1,975 | 1,391E-64  |
| TcCLB.507895.124 | hypothetical protein, conserved                           | 1,971 | 1,312E-136 |
| TcCLB.507967.20  | hypothetical protein, conserved                           | 1,97  | 1,857E-49  |
| TcCLB.508211.60  | hypothetical protein, conserved                           | 1,965 | 5,351E-52  |
| TcCLB.510655.120 | aminopeptidase P, putative                                | 1,962 | 4,194E-78  |
| TcCLB.503975.60  | hypothetical protein                                      | 1,956 | 3,269E-75  |
| TcCLB.510065.5   | hypothetical protein, conserved (fragment)                | 1,952 | 4,007E-38  |
| TcCLB.511707.10  | hypothetical protein                                      | 1,951 | 1,966E-28  |
| TcCLB.504427.75  | hypothetical protein, conserved (pseudogene)              | 1,95  | 1,681E-35  |
| TcCLB.506001.90  | retrotransposon hot spot (RHS) protein, putative          | 1,946 | 1,251E-71  |
| TcCLB.511237.30  | proline oxidase (pseudogene), putative                    | 1,946 | 1,908E-59  |
| TcCLB.506811.190 | UDP-galactose 4-epimerase (GalE)                          | 1,945 | 1,075E-99  |
| TcCLB.508003.10  | retrotransposon hot spot (RHS) protein, putative          | 1,945 | 1,677E-51  |
| TcCLB.508837.90  | hypothetical protein, conserved                           | 1,944 | 1,061E-63  |
| TcCLB.511691.10  | cystathionine beta-synthase (CBS)                         | 1,941 | 9,033E-27  |

|                  |                                                              |       |            |
|------------------|--------------------------------------------------------------|-------|------------|
| TcCLB.503823.40  | glycosyl hydrolase-like protein, putative                    | 1,94  | 6,186E-98  |
| TcCLB.503959.78  | hypothetical protein, conserved                              | 1,939 | 8,939E-81  |
| TcCLB.509429.280 | hypothetical protein                                         | 1,939 | 2,074E-77  |
| TcCLB.507625.10  | retrotransposon hot spot (RHS) protein, putative             | 1,935 | 1,468E-60  |
| TcCLB.506999.60  | hypothetical protein, conserved                              | 1,933 | 6,541E-55  |
| TcCLB.510149.80  | ABC transporter, putative                                    | 1,929 | 2,633E-136 |
| TcCLB.504933.30  | hypothetical protein                                         | 1,929 | 1,208E-127 |
| TcCLB.510605.19  | hypothetical protein, conserved                              | 1,929 | 8,504E-111 |
| TcCLB.510573.10  | actin 2, putative (fragment)                                 | 1,928 | 3,296E-89  |
| TcCLB.508851.120 | ADP-ribosylation factor GTPase activating protein, putative  | 1,928 | 2,004E-63  |
| TcCLB.509363.20  | retrotransposon hot spot protein (RHS, pseudogene), putative | 1,928 | 2,013E-06  |
| TcCLB.507167.20  | retrotransposon hot spot (RHS) protein, putative             | 1,927 | 1,884E-121 |
| TcCLB.509875.50  | beta galactofuranosyl glycosyltransferase, putative          | 1,926 | 1,708E-16  |
| TcCLB.508401.20  | retrotransposon hot spot (RHS) protein, putative             | 1,925 | 1,379E-77  |
| TcCLB.458015.4   | hypothetical protein, conserved                              | 1,925 | 3,618E-45  |
| TcCLB.508567.40  | hypothetical protein, conserved                              | 1,924 | 6,433E-66  |
| TcCLB.508541.160 | hypothetical protein, conserved                              | 1,924 | 4,598E-25  |
| TcCLB.503613.40  | pterin-4-alpha-carbinolamine dehydratase, putative           | 1,922 | 1,039E-60  |
| TcCLB.506585.70  | p450 reductase, putative                                     | 1,92  | 1,257E-126 |
| TcCLB.510359.340 | phospholipid:diacylglycerol acyltransferase, putative        | 1,919 | 5,037E-87  |
| TcCLB.511461.60  | NADH-dependent fumarate reductase (pseudogene), putative     | 1,917 | 9,854E-107 |
| TcCLB.503845.30  | retrotransposon hot spot protein (RHS, pseudogene), putative | 1,917 | 2,201E-62  |
| TcCLB.510889.221 | glucose-6-phosphate isomerase, glycosomal, putative          | 1,917 | 1,149E-61  |
| TcCLB.507081.110 | aminopeptidase P1, putative                                  | 1,917 | 1,442E-58  |
| TcCLB.506549.9   | dispersed gene family protein 1 (DGF-1), putative (fragment) | 1,916 | 1,658E-39  |
| TcCLB.419637.9   | dispersed gene family protein 1 (DGF-1), putative            | 1,913 | 0,0004567  |
| TcCLB.510347.20  | hypothetical protein, conserved                              | 1,912 | 1,602E-65  |
| TcCLB.506563.120 | hypothetical protein, conserved                              | 1,911 | 3,701E-57  |
| TcCLB.510571.39  | actin 2, putative (fragment)                                 | 1,91  | 2,859E-47  |
| TcCLB.511011.10  | retrotransposon hot spot (RHS) protein, putative             | 1,908 | 1,465E-59  |
| TcCLB.504421.19  | hypothetical protein, conserved                              | 1,906 | 6,793E-76  |
| TcCLB.510299.20  | hypothetical protein, conserved                              | 1,906 | 2,464E-34  |
| TcCLB.430539.10  | hypothetical protein, conserved (fragment)                   | 1,905 | 4,771E-14  |
| TcCLB.510669.40  | hypothetical protein                                         | 1,903 | 4,956E-74  |
| TcCLB.507519.150 | Adenine phosphoribosyltransferase, putative                  | 1,903 | 3,554E-59  |
| TcCLB.506567.70  | NAD(P)-dependent oxidoreductase, putative                    | 1,901 | 7,715E-83  |
| TcCLB.510751.4   | aminopeptidase P, putative                                   | 1,901 | 2,084E-71  |
| TcCLB.508387.140 | hypothetical protein, conserved                              | 1,899 | 3,106E-56  |
| TcCLB.508241.140 | cystathionine beta-synthase, putative (CBS)                  | 1,899 | 1,331E-36  |
| TcCLB.503835.39  | hypothetical protein, conserved                              | 1,896 | 1,004E-52  |
| TcCLB.511009.9   | dispersed gene family protein 1 (DGF-1), putative (fragment) | 1,896 | 4,138E-13  |
| TcCLB.508507.40  | hypothetical protein, conserved                              | 1,892 | 5,518E-26  |
| TcCLB.508297.50  | short chain dehydrogenase, putative                          | 1,891 | 6,353E-58  |
| TcCLB.503975.50  | hypothetical protein, conserved                              | 1,889 | 1,443E-95  |
| TcCLB.507167.200 | beta galactofuranosyl glycosyltransferase, putative          | 1,888 | 3,205E-12  |

|                  |                                                            |       |            |
|------------------|------------------------------------------------------------|-------|------------|
| TcCLB.506303.80  | hypothetical protein, conserved                            | 1,884 | 3,183E-116 |
| TcCLB.506989.220 | hypothetical protein, conserved                            | 1,884 | 5,121E-52  |
| TcCLB.508569.70  | hypothetical protein, conserved                            | 1,88  | 8,536E-80  |
| TcCLB.509259.50  | retrotransposon hot spot protein (RHS, pseudogene), puta   | 1,88  | 8,112E-46  |
| TcCLB.442383.19  | hypothetical protein                                       | 1,877 | 1,818E-39  |
| TcCLB.510819.119 | zinc finger (CCCH type) protein, putative                  | 1,876 | 8,11E-70   |
| TcCLB.510127.79  | actin 3, putative (fragment)                               | 1,876 | 4,581E-62  |
| TcCLB.511911.94  | hypothetical protein, conserved                            | 1,873 | 2,045E-76  |
| TcCLB.509245.29  | hypothetical protein, conserved                            | 1,872 | 1,098E-27  |
| TcCLB.506773.140 | DNA ligase, putative                                       | 1,87  | 6,068E-57  |
| TcCLB.511039.30  | hypothetical protein, conserved                            | 1,87  | 6,633E-41  |
| TcCLB.510667.140 | ribulose-phosphate 3-epimerase, putative                   | 1,87  | 1,294E-39  |
| TcCLB.506793.40  | UDP-glucuronic acid/UDP-N-acetylgalactosamine transpo      | 1,869 | 2,669E-39  |
| TcCLB.505615.20  | lipase (pseudogene), putative                              | 1,869 | 1,643E-08  |
| TcCLB.509109.14  | hypothetical protein, conserved (fragment)                 | 1,868 | 1,189E-41  |
| TcCLB.508149.10  | dispersed gene family protein 1 (DGF-1), putative          | 1,868 | 1,174E-08  |
| TcCLB.511071.50  | 3-hydroxy-3-methylglutaryl-CoA synthase, putative          | 1,867 | 5,74E-135  |
| TcCLB.508601.119 | ribose 5-phosphate isomerase, putative                     | 1,864 | 3,062E-48  |
| TcCLB.511229.50  | S-adenosylhomocysteine hydrolase, putative                 | 1,863 | 5,488E-64  |
| TcCLB.511421.185 | hypothetical protein, conserved                            | 1,863 | 1,445E-34  |
| TcCLB.503903.60  | hypothetical protein, conserved                            | 1,862 | 8,097E-79  |
| TcCLB.509597.20  | carbonic anhydrase-like protein, putative                  | 1,861 | 3,123E-73  |
| TcCLB.506381.10  | retrotransposon hot spot protein (RHS, pseudogene), puta   | 1,86  | 5,144E-32  |
| TcCLB.511515.40  | heat shock 70 kDa protein, mitochondrial precursor, putati | 1,859 | 1,337E-89  |
| TcCLB.402375.10  | retrotransposon hot spot protein (RHS, pseudogene), puta   | 1,858 | 4,721E-66  |
| TcCLB.508945.10  | hypothetical protein, conserved                            | 1,857 | 8,102E-47  |
| TcCLB.509331.120 | hypothetical protein, conserved                            | 1,856 | 2,365E-60  |
| TcCLB.507221.20  | poly(A)-specific ribonuclease PARN, putative               | 1,854 | 7,5E-46    |
| TcCLB.506421.10  | retrotransposon hot spot (RHS) protein, putative           | 1,852 | 4,782E-92  |
| TcCLB.506789.240 | hypothetical protein, conserved                            | 1,85  | 1,304E-43  |
| TcCLB.508177.90  | hypothetical protein, conserved                            | 1,845 | 9,758E-86  |
| TcCLB.510911.14  | hypothetical protein, conserved                            | 1,845 | 1,319E-55  |
| TcCLB.503657.70  | tyrosine phosphatase, putative                             | 1,845 | 2,177E-34  |
| TcCLB.508409.210 | Hsc70-interacting protein, putative (HIP)                  | 1,844 | 3,907E-139 |
| TcCLB.510131.40  | haloacid dehalogenase-like hydrolase, putative             | 1,842 | 1,105E-47  |
| TcCLB.443403.9   | retrotransposon hot spot (RHS) protein, putative           | 1,84  | 4,422E-39  |
| TcCLB.508461.570 | Gim5A protein, putative                                    | 1,838 | 2,239E-122 |
| TcCLB.509721.60  | poly(ADP-ribose) polymerase, putative                      | 1,837 | 7,402E-74  |
| TcCLB.503703.40  | hypothetical protein, conserved                            | 1,837 | 2,568E-42  |
| TcCLB.503411.4   | hypothetical protein, conserved                            | 1,837 | 4,177E-13  |
| TcCLB.509733.100 | translation elongation factor 1-beta, putative             | 1,834 | 2,279E-164 |
| TcCLB.508801.10  | protein associated with differentiation 4, putative        | 1,834 | 1,753E-69  |
| TcCLB.458759.14  | hypothetical protein, conserved                            | 1,834 | 1,711E-58  |
| TcCLB.510541.9   | dispersed gene family protein 1 (DGF-1), putative          | 1,833 | 0,00004621 |
| TcCLB.509463.10  | transmembrane amino acid transporter, putative             | 1,832 | 7,075E-75  |

|                  |                                                            |       |            |
|------------------|------------------------------------------------------------|-------|------------|
| TcCLB.508319.20  | Present in the outer mitochondrial membrane proteome 1     | 1,832 | 2,325E-65  |
| TcCLB.509903.5   | retrotransposon hot spot (RHS) protein, putative (fragmer  | 1,83  | 6,305E-72  |
| TcCLB.425969.9   | cyclin-dependent kinases regulatory subunit, putative (P12 | 1,83  | 2,772E-24  |
| TcCLB.507889.20  | hypothetical protein, conserved                            | 1,828 | 8,128E-33  |
| TcCLB.510879.160 | tyrosine phosphatase, putative                             | 1,827 | 5,598E-106 |
| TcCLB.511627.130 | hypothetical protein, conserved                            | 1,827 | 1,505E-56  |
| TcCLB.510857.4   | hypothetical protein, conserved                            | 1,824 | 2,48E-63   |
| TcCLB.510611.20  | UDP-glucuronic acid/UDP-N-acetylgalactosamine transpo      | 1,822 | 2,434E-28  |
| TcCLB.508221.87  | retrotransposon hot spot protein (RHS, pseudogene), puta   | 1,82  | 9,643E-12  |
| TcCLB.511007.10  | dispersed gene family protein 1 (DGF-1), putative          | 1,819 | 8,423E-22  |
| TcCLB.509965.429 | hypothetical protein, conserved                            | 1,818 | 1,032E-07  |
| TcCLB.508425.10  | dispersed gene family protein 1 (DGF-1), putative          | 1,817 | 3,152E-11  |
| TcCLB.509167.110 | S-adenosylmethionine decarboxylase proenzyme, putative     | 1,816 | 7,502E-54  |
| TcCLB.507641.250 | hypothetical protein                                       | 1,816 | 3,898E-35  |
| TcCLB.509791.100 | hypothetical protein, conserved                            | 1,815 | 7,271E-44  |
| TcCLB.509963.40  | dispersed gene family protein 1 (DGF-1), putative          | 1,808 | 9,167E-34  |
| TcCLB.503925.3   | hypothetical protein, conserved                            | 1,807 | 2,048E-26  |
| TcCLB.399997.10  | retrotransposon hot spot (RHS) protein, putative           | 1,805 | 4,213E-44  |
| TcCLB.503477.10  | hypothetical protein, conserved                            | 1,804 | 1,181E-41  |
| TcCLB.506831.63  | hypothetical protein, conserved                            | 1,804 | 1,771E-41  |
| TcCLB.511245.150 | fatty acid elongase, putative                              | 1,803 | 3,394E-42  |
| TcCLB.511513.14  | hypothetical protein, conserved                            | 1,803 | 5,788E-15  |
| TcCLB.508931.10  | hypothetical protein                                       | 1,801 | 2,291E-47  |
| TcCLB.508265.10  | glutathione-S-transferase/glutaredoxin, putative           | 1,801 | 1,452E-36  |
| TcCLB.511053.10  | hypothetical protein, conserved                            | 1,801 | 5,47E-34   |
| TcCLB.509683.124 | hypothetical protein, conserved                            | 1,8   | 4,269E-85  |
| TcCLB.509463.41  | retrotransposon hot spot (RHS) protein, putative (fragmer  | 1,797 | 3,067E-59  |
| TcCLB.510153.19  | tricarboxylate carrier, putative                           | 1,797 | 2,093E-29  |
| TcCLB.509721.40  | MIX protein, putative                                      | 1,796 | 1,972E-43  |
| TcCLB.510847.20  | beta galactofuranosyl glycosyltransferase, putative        | 1,796 | 5,688E-30  |
| TcCLB.506047.20  | retrotransposon hot spot (RHS) protein, putative           | 1,795 | 5,189E-45  |
| TcCLB.511573.49  | hypothetical protein                                       | 1,793 | 1,571E-60  |
| TcCLB.509457.50  | retrotransposon hot spot (RHS) protein, putative           | 1,793 | 1,017E-30  |
| TcCLB.509877.40  | hypothetical protein, conserved                            | 1,792 | 7,348E-96  |
| TcCLB.508931.40  | hypothetical protein, conserved                            | 1,791 | 4,879E-29  |
| TcCLB.504207.5   | hypothetical protein, conserved                            | 1,791 | 2,229E-07  |
| TcCLB.506109.29  | dispersed gene family protein 1 (DGF-1), putative          | 1,79  | 1,223E-23  |
| TcCLB.506751.116 | elongation factor 1-gamma (EF-1-gamma, pseudogene),        | 1,789 | 0,00001895 |
| TcCLB.507675.10  | hypothetical protein, conserved                            | 1,788 | 7,262E-110 |
| TcCLB.511531.30  | hypothetical protein, conserved                            | 1,787 | 7,044E-17  |
| TcCLB.506183.80  | hypothetical protein                                       | 1,786 | 8,298E-06  |
| TcCLB.506375.90  | hypothetical protein, conserved                            | 1,784 | 8,12E-43   |
| TcCLB.508557.29  | hypothetical protein, conserved                            | 1,783 | 1,498E-74  |
| TcCLB.506261.10  | fatty acyl CoA synthetase 2, putative                      | 1,783 | 3,471E-59  |
| TcCLB.507687.30  | retrotransposon hot spot protein (RHS, pseudogene), puta   | 1,783 | 1,796E-26  |



|                  |                                                           |       |            |
|------------------|-----------------------------------------------------------|-------|------------|
| TcCLB.510571.30  | actin 1, putative                                         | 1,781 | 5,808E-119 |
| TcCLB.506633.90  | folate/pteridine transporter, putative                    | 1,781 | 2,718E-89  |
| TcCLB.507053.40  | hypothetical protein, conserved                           | 1,778 | 8,279E-104 |
| TcCLB.509237.10  | mevalonate kinase, putative                               | 1,779 | 2,757E-69  |
| TcCLB.418185.21  | retrotransposon hot spot protein (RHS, pseudogene), puta  | 1,777 | 6,138E-16  |
| TcCLB.506905.50  | cystathionine beta-synthase (CBS)                         | 1,776 | 4,813E-113 |
| TcCLB.506017.51  | retrotransposon hot spot (RHS) protein, putative (fragmer | 1,775 | 5,224E-94  |
| TcCLB.506811.120 | hypothetical protein, conserved                           | 1,772 | 8,524E-80  |
| TcCLB.507395.40  | hypothetical protein                                      | 1,771 | 0,004052   |
| TcCLB.506933.60  | mitochondrial RNA binding protein, putative               | 1,768 | 4,909E-102 |
| TcCLB.446325.9   | retrotransposon hot spot (RHS) protein, putative (fragmer | 1,766 | 8,016E-33  |
| TcCLB.509397.9   | dispersed gene family protein 1 (DGF-1), putative (fragme | 1,766 | 2,512E-17  |
| TcCLB.503887.40  | hypothetical protein, conserved                           | 1,765 | 2,959E-74  |
| TcCLB.506605.59  | adenosine 5'-monophosphoramidase, putative                | 1,762 | 3,75E-32   |
| TcCLB.506521.9   | dispersed gene family protein 1 (DGF-1), putative         | 1,762 | 3,567E-31  |
| TcCLB.503605.20  | retrotransposon hot spot (RHS) protein, putative          | 1,762 | 1,027E-19  |
| TcCLB.508241.20  | hypothetical protein, conserved                           | 1,761 | 1,008E-79  |
| TcCLB.504427.64  | hypothetical protein, conserved                           | 1,761 | 1,071E-35  |
| TcCLB.506195.120 | lysosomal alpha-mannosidase precursor, putative           | 1,761 | 1,217E-30  |
| TcCLB.511837.90  | protein kinase, putative                                  | 1,76  | 4,067E-54  |
| TcCLB.508355.127 | hypothetical protein, conserved                           | 1,759 | 2,14E-61   |
| TcCLB.507655.9   | dispersed gene family protein 1 (DGF-1), putative         | 1,759 | 2,735E-10  |
| TcCLB.508869.20  | mucin-associated surface protein (MASP), putative         | 1,759 | 1,734E-06  |
| TcCLB.509539.30  | fatty acid elongase, putative                             | 1,758 | 2,346E-17  |
| TcCLB.507669.160 | hypothetical protein, conserved                           | 1,757 | 4,305E-108 |
| TcCLB.506959.70  | serine palmitoyltransferase, putative                     | 1,756 | 3,379E-87  |
| TcCLB.509859.10  | hypothetical protein, conserved                           | 1,754 | 3,883E-111 |
| TcCLB.508177.110 | cystathionine beta-synthase                               | 1,754 | 7,092E-91  |
| TcCLB.505201.9   | retrotransposon hot spot (RHS) protein, putative          | 1,754 | 3,741E-29  |
| TcCLB.504125.100 | sugar transporter (pseudogene), putative                  | 1,754 | 1,805E-20  |
| TcCLB.510945.70  | aspartate aminotransferase, mitochondrial, putative       | 1,753 | 5,996E-58  |
| TcCLB.508641.240 | hypothetical protein, conserved                           | 1,753 | 3,414E-50  |
| TcCLB.508285.50  | retrotransposon hot spot protein (RHS, pseudogene), puta  | 1,753 | 1,492E-49  |
| TcCLB.511277.490 | hypothetical protein, conserved                           | 1,752 | 1,111E-78  |
| TcCLB.506175.100 | hypothetical protein, conserved                           | 1,749 | 5,481E-55  |
| TcCLB.504153.120 | hypothetical protein, conserved                           | 1,748 | 1,628E-90  |
| TcCLB.509959.90  | retrotransposon hot spot protein (RHS, pseudogene), puta  | 1,748 | 2,539E-37  |
| TcCLB.509715.30  | cullin-like protein, putative                             | 1,747 | 3,987E-48  |
| TcCLB.507849.70  | hypothetical protein                                      | 1,746 | 1,997E-77  |
| TcCLB.507099.30  | Ran-binding protein 1, putative                           | 1,746 | 2,052E-65  |
| TcCLB.511531.20  | hypothetical protein, conserved                           | 1,746 | 2,191E-32  |
| TcCLB.511211.70  | cytochrome c oxidase assembly protein (COX15)             | 1,745 | 1,218E-74  |
| TcCLB.508387.120 | glutaminyl cyclase, putative                              | 1,744 | 6,937E-80  |
| TcCLB.511693.40  | hypothetical protein, conserved                           | 1,744 | 6,025E-79  |
| TcCLB.509319.90  | trypanothione synthetase (TRYS)                           | 1,743 | 2,056E-45  |

|                  |                                                               |       |            |
|------------------|---------------------------------------------------------------|-------|------------|
| TcCLB.509431.10  | hypothetical protein, conserved (pseudogene)                  | 1,743 | 1,304E-39  |
| TcCLB.509937.20  | hypothetical protein, conserved                               | 1,74  | 1,028E-100 |
| TcCLB.486465.9   | cysteine peptidase, Clan CA, family C51, putative             | 1,739 | 7,04E-11   |
| TcCLB.507923.10  | L-threonine 3-dehydrogenase, putative                         | 1,737 | 3,366E-105 |
| TcCLB.504427.60  | hypothetical protein, conserved                               | 1,737 | 3,742E-28  |
| TcCLB.509109.130 | protein tyrosine phosphatase-like protein, putative           | 1,736 | 3,442E-36  |
| TcCLB.432677.20  | heat shock 70 kDa protein, mitochondrial precursor, putative  | 1,733 | 6,856E-108 |
| TcCLB.506425.50  | hypothetical protein, conserved                               | 1,733 | 1,577E-54  |
| TcCLB.509437.70  | hypothetical protein, conserved                               | 1,731 | 5,676E-95  |
| TcCLB.504427.70  | 3-oxo-5-alpha-steroid 4-dehydrogenase, putative               | 1,728 | 1,466E-40  |
| TcCLB.511277.175 | ribosomal protein S27, putative                               | 1,727 | 3,254E-72  |
| TcCLB.504427.110 | acetyl-CoA synthetase, putative                               | 1,727 | 9,984E-51  |
| TcCLB.510361.160 | retrotransposon hot spot protein (RHS, pseudogene), putative  | 1,727 | 1,208E-18  |
| TcCLB.476421.9   | protein kinase, putative                                      | 1,726 | 1,424E-38  |
| TcCLB.506753.150 | hypothetical protein, conserved                               | 1,724 | 9,114E-31  |
| TcCLB.511907.260 | cell division cycle protein 20, putative (CDC20)              | 1,723 | 1,323E-79  |
| TcCLB.511753.120 | L-threonine 3-dehydrogenase, putative                         | 1,721 | 3,053E-128 |
| TcCLB.504313.30  | dispersed gene family protein 1 (DGF-1), putative             | 1,721 | 1,009E-32  |
| TcCLB.509223.10  | dispersed gene family protein 1 (DGF-1, pseudogene), putative | 1,721 | 4,832E-31  |
| TcCLB.511773.90  | retrotransposon hot spot protein (RHS, pseudogene), putative  | 1,72  | 1,54E-53   |
| TcCLB.511655.30  | hypothetical protein                                          | 1,719 | 2,424E-86  |
| TcCLB.507017.40  | 2-hydroxy-3-oxopropionate reductase, putative                 | 1,718 | 2,534E-76  |
| TcCLB.510445.50  | S-adenosylmethionine synthetase, putative (METK1)             | 1,717 | 6,831E-80  |
| TcCLB.507031.140 | hypothetical protein, conserved (pseudogene)                  | 1,716 | 1,38E-36   |
| TcCLB.509231.10  | cytochrome P450, putative                                     | 1,715 | 3,568E-67  |
| TcCLB.506721.50  | hypothetical protein                                          | 1,714 | 4,456E-14  |
| TcCLB.508177.70  | hypothetical protein                                          | 1,712 | 3,783E-74  |
| TcCLB.510595.4   | hypothetical protein, conserved                               | 1,712 | 3,58E-16   |
| TcCLB.509329.9   | retrotransposon hot spot (RHS) protein, putative              | 1,711 | 2,983E-23  |
| TcCLB.506465.14  | hypothetical protein, conserved                               | 1,706 | 2,48E-48   |
| TcCLB.508451.30  | retrotransposon hot spot protein (RHS, pseudogene), putative  | 1,706 | 4,434E-17  |
| TcCLB.510801.10  | calpain-like cysteine peptidase, putative (fragment)          | 1,704 | 3,049E-21  |
| TcCLB.511555.80  | ribonucleoside-diphosphate reductase small chain, putative    | 1,703 | 4,741E-33  |
| TcCLB.507603.260 | cysteine peptidase, putative                                  | 1,703 | 0,00003611 |
| TcCLB.510879.180 | hypothetical protein                                          | 1,702 | 3,019E-33  |
| TcCLB.503811.60  | Elongation factor Ts, mitochondrial, putative (EF-Ts)         | 1,701 | 1,229E-64  |
| TcCLB.507059.80  | glutamine-dependent carbamoyl-phosphate synthetase, putative  | 1,701 | 2,631E-56  |
| TcCLB.509505.30  | 10 kDa heat shock protein, putative                           | 1,701 | 1,133E-16  |
| TcCLB.507569.10  | hypothetical protein, conserved                               | 1,699 | 2,815E-42  |
| TcCLB.510633.9   | dispersed gene family protein 1 (DGF-1), putative (fragment)  | 1,699 | 6,408E-12  |
| TcCLB.505047.9   | dispersed gene family protein 1 (DGF-1), putative             | 1,699 | 1,16E-09   |
| TcCLB.511647.4   | glutamine-dependent carbamoyl-phosphate synthetase, putative  | 1,698 | 1,297E-51  |
| TcCLB.510543.60  | retrotransposon hot spot protein (RHS, pseudogene), putative  | 1,697 | 1,061E-41  |
| TcCLB.511475.24  | dispersed gene family protein 1 (DGF-1), putative (fragment)  | 1,697 | 2,52E-16   |
| TcCLB.511391.160 | cytochrome c1, heme protein, mitochondrial, putative (CYC1)   | 1,696 | 3,047E-105 |

|                  |                                                            |       |            |
|------------------|------------------------------------------------------------|-------|------------|
| TcCLB.510861.125 | hypothetical protein, conserved                            | 1,693 | 1,04E-47   |
| TcCLB.507009.10  | Gim5A protein, putative                                    | 1,693 | 2,799E-41  |
| TcCLB.506925.14  | hypothetical protein, conserved                            | 1,692 | 5,702E-84  |
| TcCLB.504131.180 | ATPase subunit 9, putative                                 | 1,691 | 1,09E-72   |
| TcCLB.507473.40  | retrotransposon hot spot protein (RHS, pseudogene), puta   | 1,691 | 1,352E-50  |
| TcCLB.506835.159 | casein kinase 1 isoform 2, putative (fragment)             | 1,688 | 1,519E-16  |
| TcCLB.508461.84  | hypothetical protein                                       | 1,686 | 1,28E-42   |
| TcCLB.507777.20  | hypothetical protein, conserved                            | 1,685 | 3,11E-26   |
| TcCLB.506811.20  | hypothetical protein, conserved                            | 1,684 | 8,529E-39  |
| TcCLB.506675.110 | retrotransposon hot spot (RHS) protein, putative           | 1,684 | 2,896E-32  |
| TcCLB.509457.60  | retrotransposon hot spot (RHS) protein, putative           | 1,682 | 3,932E-19  |
| TcCLB.508177.120 | cystathionine beta-synthase (CBS)                          | 1,681 | 1,134E-88  |
| TcCLB.510079.49  | dispersed gene family protein 1 (DGF-1), putative (fragme  | 1,679 | 3,415E-16  |
| TcCLB.511277.210 | peroxisomal enoyl-coa hydratase, putative                  | 1,677 | 1,739E-88  |
| TcCLB.510301.80  | N-acetyltransferase subunit Nat1, putative                 | 1,677 | 1,732E-53  |
| TcCLB.509331.80  | hypothetical protein, conserved                            | 1,677 | 1,046E-29  |
| TcCLB.507091.50  | aspartate carbamoyltransferase, putative                   | 1,676 | 3,572E-46  |
| TcCLB.509725.80  | retrotransposon hot spot protein (RHS, pseudogene), puta   | 1,675 | 8,408E-100 |
| TcCLB.511817.20  | hypothetical protein, conserved                            | 1,674 | 7,608E-54  |
| TcCLB.507517.80  | hypothetical protein, conserved                            | 1,674 | 1,069E-33  |
| TcCLB.506469.10  | hypothetical protein, conserved                            | 1,674 | 1,552E-32  |
| TcCLB.505807.110 | alkyl-dihydroxyacetone phosphate synthase, putative        | 1,672 | 4,197E-116 |
| TcCLB.510989.30  | guanin nucleotide-binding protein, putative                | 1,672 | 1,616E-37  |
| TcCLB.510445.10  | casein kinase 1 isoform 2, putative                        | 1,672 | 3,014E-23  |
| TcCLB.511217.145 | ribosomal protein L39, putative                            | 1,671 | 1,526E-69  |
| TcCLB.507225.19  | hypothetical protein                                       | 1,671 | 1,214E-50  |
| TcCLB.503991.20  | Xaa-Pro aminopeptidase, putative                           | 1,67  | 1,136E-55  |
| TcCLB.509885.80  | hypothetical protein, conserved                            | 1,67  | 7,371E-15  |
| TcCLB.507167.169 | dispersed gene family protein 1 (DGF-1), putative          | 1,669 | 1,312E-17  |
| TcCLB.507555.80  | retrotransposon hot spot (RHS) protein, putative           | 1,666 | 9,462E-75  |
| TcCLB.504797.70  | DNA excision/repair protein SNF2, putative                 | 1,665 | 5,713E-87  |
| TcCLB.509917.19  | retrotransposon hot spot (RHS) protein, putative (fragmer  | 1,662 | 3,472E-70  |
| TcCLB.509167.150 | homoserine kinase, putative                                | 1,662 | 5,853E-50  |
| TcCLB.507485.20  | hypothetical protein, conserved                            | 1,661 | 4,951E-34  |
| TcCLB.507611.50  | hypothetical protein, conserved                            | 1,66  | 0,00007973 |
| TcCLB.506949.50  | cytochrome c, putative                                     | 1,659 | 8,625E-55  |
| TcCLB.457251.10  | 3-oxo-5-alpha-steroid 4-dehydrogenase, putative (fragme    | 1,658 | 7,796E-46  |
| TcCLB.509831.36  | guide RNA-binding protein of 21 kDa (gBP21)                | 1,657 | 5,765E-66  |
| TcCLB.510283.70  | glycosyl hydrolase-like protein, putative                  | 1,657 | 4,824E-53  |
| TcCLB.511745.10  | heat shock 70 kDa protein, mitochondrial precursor, putati | 1,655 | 3,01E-68   |
| TcCLB.507691.20  | dispersed gene family protein 1 (DGF-1), putative          | 1,655 | 7,193E-36  |
| TcCLB.511077.20  | beta galactofuranosyl glycosyltransferase (pseudogene), p  | 1,655 | 1,468E-06  |
| TcCLB.507631.20  | hypothetical protein, conserved                            | 1,654 | 4,716E-39  |
| TcCLB.503923.40  | hypothetical protein, conserved                            | 1,654 | 7,945E-13  |
| TcCLB.507105.100 | retrotransposon hot spot protein (RHS, pseudogene), puta   | 1,652 | 3,394E-77  |

|                  |                                                           |       |            |
|------------------|-----------------------------------------------------------|-------|------------|
| TcCLB.508831.110 | serine/threonine kinase, putative                         | 1,652 | 7,102E-35  |
| TcCLB.511589.200 | S-adenosylhomocysteine hydrolase, putative                | 1,651 | 2,144E-44  |
| TcCLB.511025.90  | hypothetical protein, conserved                           | 1,65  | 1,075E-32  |
| TcCLB.505919.70  | glycine dehydrogenase [decarboxylating] (pseudogene), p   | 1,65  | 5,234E-20  |
| TcCLB.504425.100 | hypothetical protein, conserved                           | 1,649 | 2,032E-28  |
| TcCLB.483389.10  | retrotransposon hot spot protein (RHS, pseudogene), puta  | 1,648 | 1,568E-54  |
| TcCLB.503965.20  | hypothetical protein, conserved                           | 1,648 | 3,691E-53  |
| TcCLB.510181.20  | delta-4 fatty acid desaturase, putative                   | 1,648 | 8,343E-25  |
| TcCLB.503893.30  | hypothetical protein, conserved                           | 1,644 | 2,907E-39  |
| TcCLB.507875.110 | retrotransposon hot spot protein (RHS, pseudogene), puta  | 1,644 | 5,069E-32  |
| TcCLB.509717.90  | short chain 3-hydroxyacyl-CoA dehydrogenase, putative     | 1,642 | 1,263E-79  |
| TcCLB.459199.10  | retrotransposon hot spot (RHS) protein, putative          | 1,641 | 7,656E-94  |
| TcCLB.511179.100 | monothiol glutaredoxin, putative                          | 1,641 | 2,487E-39  |
| TcCLB.506635.80  | Hydroxymethylglutaryl-CoA lyase, mitochondrial, putative  | 1,639 | 1,599E-46  |
| TcCLB.511635.40  | protein tyrosine phosphatase, putative                    | 1,638 | 3,973E-81  |
| TcCLB.509185.10  | retrotransposon hot spot protein (RHS, pseudogene), puta  | 1,637 | 0,0001164  |
| TcCLB.506945.160 | S-adenosylmethionine synthetase, putative (METK1)         | 1,636 | 1,402E-87  |
| TcCLB.507687.20  | dispersed gene family protein 1 (DGF-1), putative         | 1,636 | 3,037E-13  |
| TcCLB.509601.90  | alanine racemase, putative                                | 1,635 | 3,926E-53  |
| TcCLB.509733.60  | hypothetical protein                                      | 1,633 | 2,738E-36  |
| TcCLB.506577.120 | sterol C-24 reductase, putative                           | 1,632 | 7,875E-33  |
| TcCLB.507167.110 | retrotransposon hot spot protein (RHS, pseudogene), puta  | 1,63  | 6,781E-42  |
| TcCLB.509615.2   | endosomal integral membrane protein (pseudogene), put     | 1,63  | 2,199E-29  |
| TcCLB.507653.50  | retrotransposon hot spot protein (RHS, pseudogene), puta  | 1,63  | 1,458E-22  |
| TcCLB.508461.360 | hypothetical protein, conserved                           | 1,629 | 2,038E-63  |
| TcCLB.508669.10  | hypothetical protein, conserved                           | 1,627 | 3,123E-30  |
| TcCLB.506661.10  | fatty acid elongase, putative                             | 1,626 | 4,331E-27  |
| TcCLB.507041.10  | hypothetical protein, conserved                           | 1,625 | 4,168E-56  |
| TcCLB.507757.30  | hypothetical protein, conserved                           | 1,625 | 1,661E-33  |
| TcCLB.509163.80  | glycine dehydrogenase [decarboxylating], putative         | 1,625 | 2,356E-14  |
| TcCLB.507007.108 | amino acid transporter, putative                          | 1,624 | 2,798E-39  |
| TcCLB.504177.10  | fatty acyl CoA synthetase 2, putative                     | 1,624 | 2,92E-30   |
| TcCLB.509229.80  | mitochondrial processing peptidase alpha subunit, putativ | 1,623 | 2,424E-78  |
| TcCLB.507485.40  | hypothetical protein, conserved                           | 1,622 | 1,012E-58  |
| TcCLB.505975.30  | beta galactofuranosyl glycosyltransferase (pseudogene), † | 1,622 | 9,104E-17  |
| TcCLB.506835.70  | PAS-domain containing phosphoglycerate kinase, putative   | 1,62  | 4,38E-59   |
| TcCLB.507609.40  | delta-4 fatty acid desaturase, putative                   | 1,62  | 4,768E-22  |
| TcCLB.506925.380 | hypothetical protein                                      | 1,619 | 5,738E-36  |
| TcCLB.511529.80  | kinetoplast-associated protein 3 (KAP3)                   | 1,618 | 2,869E-45  |
| TcCLB.508827.10  | membrane-bound acid phosphatase, putative                 | 1,618 | 5,234E-34  |
| TcCLB.510515.30  | hypothetical protein, conserved                           | 1,617 | 8,339E-63  |
| TcCLB.507715.10  | cysteine peptidase, Clan CA, family C51, putative         | 1,617 | 1,506E-54  |
| TcCLB.511613.189 | mucin TcMUCII, putative                                   | 1,617 | 0,00008789 |
| TcCLB.510065.10  | hypothetical protein, conserved                           | 1,616 | 3,286E-70  |
| TcCLB.511233.80  | calmodulin, putative                                      | 1,616 | 3,591E-43  |

|                  |                                                                 |       |            |
|------------------|-----------------------------------------------------------------|-------|------------|
| TcCLB.508937.10  | dispersed gene family protein 1 (DGF-1, pseudogene), putative   | 1,616 | 2,861E-11  |
| TcCLB.510039.64  | hypothetical protein, conserved                                 | 1,615 | 1,816E-39  |
| TcCLB.507293.20  | dispersed gene family protein 1 (DGF-1, pseudogene), putative   | 1,614 | 9,247E-25  |
| TcCLB.506325.36  | N-acetyltransferase complex ARD1 subunit (pseudogene), putative | 1,613 | 7,312E-07  |
| TcCLB.510355.150 | retrotransposon hot spot protein (RHS, pseudogene), putative    | 1,612 | 1,02E-40   |
| TcCLB.506183.109 | dispersed gene family protein 1 (DGF-1, pseudogene), putative   | 1,612 | 0,01559    |
| TcCLB.504165.10  | hypothetical protein, conserved                                 | 1,611 | 1,481E-37  |
| TcCLB.510593.49  | kinetoplast DNA-associated protein, putative                    | 1,608 | 7,841E-58  |
| TcCLB.510359.350 | hypothetical protein, conserved                                 | 1,607 | 6,969E-74  |
| TcCLB.509205.60  | hypothetical protein, conserved                                 | 1,607 | 3,264E-61  |
| TcCLB.503849.60  | NADH-dependent fumarate reductase, putative                     | 1,606 | 6,089E-49  |
| TcCLB.507465.10  | receptor-type adenylate cyclase, putative (fragment)            | 1,606 | 2,378E-12  |
| TcCLB.508277.220 | hypothetical protein                                            | 1,605 | 6,61E-107  |
| TcCLB.503597.10  | homoserine kinase, putative                                     | 1,605 | 1,211E-48  |
| TcCLB.509259.120 | retrotransposon hot spot (RHS) protein, putative                | 1,605 | 2,754E-29  |
| TcCLB.507159.80  | hypothetical protein, conserved                                 | 1,603 | 3,614E-61  |
| TcCLB.507499.30  | retrotransposon hot spot protein (RHS, pseudogene), putative    | 1,601 | 2,032E-30  |
| TcCLB.507855.9   | dispersed gene family protein 1 (DGF-1), putative (fragment)    | 1,601 | 7,31E-11   |
| TcCLB.510355.10  | dispersed gene family protein 1 (DGF-1), putative               | 1,600 | 4,596E-27  |
| TcCLB.509289.39  | hypothetical protein, conserved (pseudogene)                    | 1,598 | 3,814E-26  |
| TcCLB.504137.10  | isoleucyl-tRNA synthetase, putative                             | 1,597 | 4,165E-41  |
| TcCLB.505945.69  | hypothetical protein, conserved                                 | 1,595 | 5,303E-15  |
| TcCLB.504041.10  | hypothetical protein, conserved                                 | 1,594 | 1,783E-39  |
| TcCLB.503607.4   | retrotransposon hot spot (RHS) protein, putative                | 1,594 | 6,144E-38  |
| TcCLB.506169.10  | glycine dehydrogenase [decarboxylating] (pseudogene), putative  | 1,594 | 1,214E-13  |
| TcCLB.508461.580 | hypothetical protein                                            | 1,593 | 7,487E-70  |
| TcCLB.509169.30  | hypothetical protein, conserved                                 | 1,592 | 2,966E-32  |
| TcCLB.507443.30  | UDP-Gal or UDP-GlcNAc-dependent glycosyltransferase, putative   | 1,592 | 3,107E-13  |
| TcCLB.503815.10  | alkyl-dihydroxyacetone phosphate synthase, putative             | 1,591 | 5,515E-101 |
| TcCLB.508177.129 | cystathionine beta-synthase, putative                           | 1,591 | 5,302E-91  |
| TcCLB.511025.80  | hypothetical protein, conserved                                 | 1,591 | 3,055E-18  |
| TcCLB.506625.60  | inositol 5-phosphatase 1, putative                              | 1,590 | 9,28E-80   |
| TcCLB.506771.9   | hypothetical protein, conserved                                 | 1,590 | 1,428E-43  |
| TcCLB.503661.11  | trans-sialidase, putative (fragment)                            | 1,590 | 2,591E-23  |
| TcCLB.506795.44  | hypothetical protein, conserved                                 | 1,589 | 1,286E-55  |
| TcCLB.504109.24  | dynein light chain, putative                                    | 1,589 | 4,252E-24  |
| TcCLB.509177.59  | hypothetical protein, conserved                                 | 1,588 | 2,24E-31   |
| TcCLB.508273.30  | hypothetical protein, conserved                                 | 1,585 | 9,303E-44  |
| TcCLB.511529.200 | hypothetical protein, conserved                                 | 1,585 | 3,543E-42  |
| TcCLB.509471.30  | hypothetical protein, conserved                                 | 1,584 | 1,678E-31  |
| TcCLB.507393.9   | dispersed gene family protein 1 (DGF-1), putative               | 1,583 | 8,997E-27  |
| TcCLB.511383.50  | prohibitin, putative                                            | 1,582 | 3,893E-60  |
| TcCLB.506779.90  | hypothetical protein, conserved                                 | 1,581 | 8,813E-82  |
| TcCLB.506537.180 | retrotransposon hot spot protein (RHS, pseudogene), putative    | 1,581 | 1,944E-57  |
| TcCLB.511051.59  | hypothetical protein, conserved                                 | 1,580 | 5,222E-83  |

|                  |                                                              |       |            |
|------------------|--------------------------------------------------------------|-------|------------|
| TcCLB.508621.10  | protein kinase, putative                                     | 1,579 | 8,911E-57  |
| TcCLB.510105.240 | short chain 3-hydroxyacyl-CoA dehydrogenase, putative        | 1,579 | 1,447E-52  |
| TcCLB.510859.10  | nucleolar RNA-binding protein, putative                      | 1,577 | 2,005E-84  |
| TcCLB.436521.9   | mevalonate kinase, putative (fragment)                       | 1,577 | 1,038E-36  |
| TcCLB.511671.80  | serine/threonine kinase, putative                            | 1,577 | 7,022E-26  |
| TcCLB.511277.390 | hypothetical protein, conserved                              | 1,576 | 5,651E-66  |
| TcCLB.509713.10  | protein associated with differentiation 4, putative          | 1,575 | 1,485E-141 |
| TcCLB.505945.90  | folate/pteridine transporter, putative                       | 1,575 | 2,017E-46  |
| TcCLB.508153.700 | hypothetical protein, conserved                              | 1,575 | 4,067E-33  |
| TcCLB.463155.20  | retrotransposon hot spot (RHS) protein, putative             | 1,574 | 2,206E-85  |
| TcCLB.508677.150 | glycosyl transferase, putative                               | 1,574 | 9,589E-84  |
| TcCLB.507809.39  | hypothetical protein, conserved                              | 1,574 | 2,642E-29  |
| TcCLB.507477.10  | dispersed gene family protein 1 (DGF-1), putative            | 1,574 | 1,428E-24  |
| TcCLB.506559.300 | twinfilin, putative                                          | 1,573 | 2,949E-81  |
| TcCLB.506163.50  | hypothetical protein, conserved                              | 1,572 | 3,92E-44   |
| TcCLB.510083.10  | retrotransposon hot spot protein (RHS, pseudogene), puta     | 1,572 | 2,519E-37  |
| TcCLB.507093.44  | dynein light chain, putative                                 | 1,571 | 1,446E-25  |
| TcCLB.506823.20  | retrotransposon hot spot protein (RHS, pseudogene), puta     | 1,571 | 4,476E-22  |
| TcCLB.505807.220 | ribosomal RNA adenine dimethylase family protein, putat      | 1,57  | 5,376E-48  |
| TcCLB.508221.381 | mucin-associated surface protein (MASP, pseudogene), pi      | 1,569 | 0,009171   |
| TcCLB.509295.50  | beta galactofuranosyl glycosyltransferase, putative          | 1,568 | 1,218E-14  |
| TcCLB.503929.10  | V-type ATPase, A subunit, putative                           | 1,567 | 6,473E-75  |
| TcCLB.511139.40  | ATP-dependent RNA helicase SUB2, putative (fragment) (       | 1,567 | 1,497E-22  |
| TcCLB.511727.190 | hypothetical protein, conserved                              | 1,566 | 2,334E-62  |
| TcCLB.511573.30  | hypothetical protein, conserved                              | 1,566 | 2,457E-30  |
| TcCLB.504025.10  | hypothetical protein, conserved                              | 1,565 | 1,329E-19  |
| TcCLB.509237.130 | Calpain-like protein 1 (CAP5.5)                              | 1,564 | 8,836E-91  |
| TcCLB.511047.40  | NADH-cytochrome b5 reductase, putative                       | 1,564 | 4,341E-69  |
| TcCLB.506305.29  | hypothetical protein, conserved                              | 1,564 | 8,512E-48  |
| TcCLB.504153.240 | hypothetical protein, conserved                              | 1,563 | 1,087E-38  |
| TcCLB.507969.40  | hypothetical protein, conserved                              | 1,563 | 4,135E-33  |
| TcCLB.511487.100 | retrotransposon hot spot protein (RHS, pseudogene), puta     | 1,563 | 7,617E-22  |
| TcCLB.507063.90  | mitochondrial DNA polymerase beta, putative                  | 1,562 | 3,103E-62  |
| TcCLB.506513.7   | hypothetical protein, conserved                              | 1,561 | 6,849E-40  |
| TcCLB.506459.40  | dispersed gene family protein 1 (DGF-1, pseudogene), put     | 1,561 | 0,00006351 |
| TcCLB.509177.50  | hypothetical protein, conserved                              | 1,56  | 2,526E-41  |
| TcCLB.428999.30  | hypothetical protein                                         | 1,56  | 3,195E-36  |
| TcCLB.510091.110 | mitochondrial RNA binding complex 1 subunit, putative        | 1,56  | 6,277E-36  |
| TcCLB.507411.20  | retrotransposon hot spot (RHS) protein, putative             | 1,56  | 2,063E-11  |
| TcCLB.508661.10  | Eukaryotic translation initiation factor 4E type 5, putative | 1,557 | 1,1E-41    |
| TcCLB.508045.131 | retrotransposon hot spot protein (RHS, pseudogene), puta     | 1,556 | 4,497E-10  |
| TcCLB.503831.40  | mitochondrial DNA primase, putative                          | 1,555 | 1,986E-45  |
| TcCLB.510669.5   | ribulose-phosphate 3-epimerase, putative (fragment)          | 1,555 | 2,164E-07  |
| TcCLB.506175.25  | hypothetical protein                                         | 1,553 | 3,648E-43  |
| TcCLB.509809.10  | NADH-ubiquinone oxidoreductase complex I subunit, putat      | 1,553 | 1,465E-39  |

|                  |                                                            |       |            |
|------------------|------------------------------------------------------------|-------|------------|
| TcCLB.508601.50  | NADH dehydrogenase subunit NB6M, putative                  | 1,553 | 3,786E-27  |
| TcCLB.506865.50  | Present in the outer mitochondrial membrane proteome 4     | 1,553 | 4,647E-25  |
| TcCLB.507569.4   | electron transport protein SCO1/SCO2, putative             | 1,552 | 1,94E-30   |
| TcCLB.504109.200 | retrotransposon hot spot (RHS) protein, putative           | 1,551 | 9,462E-54  |
| TcCLB.510359.270 | mitochondrial RNA-binding protein 2, putative              | 1,55  | 6,469E-41  |
| TcCLB.509717.20  | dihydrolipoamide acetyltransferase precursor, putative     | 1,549 | 4,45E-77   |
| TcCLB.510729.210 | hypothetical protein, conserved                            | 1,549 | 7,896E-58  |
| TcCLB.507739.100 | hypothetical protein                                       | 1,549 | 1,976E-27  |
| TcCLB.504557.10  | UDP-Gal or UDP-GlcNAc-dependent glycosyltransferase, p     | 1,549 | 3,383E-25  |
| TcCLB.506129.60  | beta galactofuranosyl glycosyltransferase, putative        | 1,549 | 2,015E-10  |
| TcCLB.506779.140 | hypothetical protein, conserved                            | 1,548 | 1,565E-62  |
| TcCLB.509601.70  | vacuolar proton translocating ATPase subunit A, putative ( | 1,548 | 1,592E-58  |
| TcCLB.508257.30  | hypothetical protein, conserved                            | 1,547 | 4,028E-32  |
| TcCLB.506795.80  | proline racemase                                           | 1,547 | 2,246E-31  |
| TcCLB.511621.9   | hypothetical protein, conserved                            | 1,547 | 1,061E-29  |
| TcCLB.507029.30  | heat shock 70 kDa protein, mitochondrial precursor, putati | 1,546 | 2,098E-61  |
| TcCLB.507929.10  | kinesin, putative (fragment)                               | 1,546 | 9,062E-34  |
| TcCLB.508071.90  | retrotransposon hot spot (RHS) protein, putative           | 1,545 | 1,514E-42  |
| TcCLB.510479.20  | dispersed gene family protein 1 (DGF-1, pseudogene), put   | 1,545 | 5,763E-23  |
| TcCLB.511301.44  | hypothetical protein, conserved                            | 1,543 | 5,744E-32  |
| TcCLB.510347.50  | hypothetical protein, conserved                            | 1,542 | 6,44E-43   |
| TcCLB.510421.110 | hypothetical protein                                       | 1,542 | 1,817E-36  |
| TcCLB.511395.40  | hypothetical protein                                       | 1,54  | 6,894E-76  |
| TcCLB.506623.40  | retrotransposon hot spot protein (RHS, pseudogene), puta   | 1,539 | 9,344E-39  |
| TcCLB.506925.360 | hypothetical protein                                       | 1,539 | 3,567E-33  |
| TcCLB.511155.10  | hypothetical protein, conserved (pseudogene)               | 1,538 | 5,59E-24   |
| TcCLB.508387.170 | double-strand-break repair protein rad21 homolog, putati   | 1,537 | 3,307E-50  |
| TcCLB.509153.20  | hypothetical protein, conserved                            | 1,537 | 8,786E-25  |
| TcCLB.510359.300 | hypothetical protein, conserved                            | 1,536 | 5,358E-61  |
| TcCLB.511395.70  | hypothetical protein, conserved                            | 1,535 | 9,725E-34  |
| TcCLB.506025.4   | membrane-bound acid phosphatase, putative (fragment)       | 1,535 | 2,551E-29  |
| TcCLB.504111.40  | hypothetical protein, conserved                            | 1,533 | 3,367E-31  |
| TcCLB.506943.4   | aldehyde dehydrogenase, putative                           | 1,532 | 9,061E-73  |
| TcCLB.510643.140 | 60S acidic ribosomal protein P2, putative                  | 1,532 | 1,215E-63  |
| TcCLB.510687.60  | hypothetical protein, conserved                            | 1,532 | 2,305E-59  |
| TcCLB.503995.50  | serine peptidase, clan SC, family S9A-like protein (OPB)   | 1,531 | 3,624E-49  |
| TcCLB.506295.160 | 2-oxoisovalerate dehydrogenase beta subunit, mitochondri   | 1,531 | 1,039E-41  |
| TcCLB.509229.60  | hypothetical protein, conserved                            | 1,531 | 1,128E-19  |
| TcCLB.509427.30  | dispersed gene family protein 1 (DGF-1, pseudogene), put   | 1,53  | 6,758E-08  |
| TcCLB.511817.260 | hypothetical protein, conserved                            | 1,529 | 7,497E-60  |
| TcCLB.509725.139 | damage-specific DNA binding protein, putative              | 1,528 | 1,235E-29  |
| TcCLB.511815.40  | guide RNA associated protein, GAP2, putative               | 1,526 | 1,298E-103 |
| TcCLB.506147.60  | 3-demethylubiquinone-9 3-methyltransferase, putative       | 1,525 | 1,272E-30  |
| TcCLB.504071.30  | hypothetical protein, conserved                            | 1,524 | 2,157E-97  |
| TcCLB.511475.50  | dispersed gene family protein 1 (DGF-1), putative          | 1,524 | 7,258E-16  |

|                  |                                                            |       |           |
|------------------|------------------------------------------------------------|-------|-----------|
| TcCLB.506649.50  | cytochrome c oxidase assembly factor, putative             | 1,523 | 1,7E-45   |
| TcCLB.509717.176 | retrotransposon hot spot (RHS) protein, putative (fragmer  | 1,523 | 8,019E-10 |
| TcCLB.506003.10  | retrotransposon hot spot protein (RHS, pseudogene), puta   | 1,523 | 2,688E-08 |
| TcCLB.432677.10  | heat shock 70 kDa protein, mitochondrial precursor (pseuc  | 1,521 | 2,364E-54 |
| TcCLB.510507.40  | transmembrane amino acid transporter, putative             | 1,521 | 1,442E-46 |
| TcCLB.509029.100 | hypothetical protein, conserved                            | 1,521 | 3,916E-33 |
| TcCLB.507991.129 | cyclophilin, putative                                      | 1,521 | 4,471E-25 |
| TcCLB.506401.110 | protein kinase, putative                                   | 1,52  | 6,121E-82 |
| TcCLB.505163.70  | Selenoprotein T, putative (SelT)                           | 1,52  | 5,349E-56 |
| TcCLB.511589.180 | hypothetical protein, conserved                            | 1,52  | 4,011E-39 |
| TcCLB.503903.79  | hypothetical protein                                       | 1,52  | 2,245E-24 |
| TcCLB.504069.70  | vacuolar ATP synthase, putative                            | 1,519 | 1,104E-74 |
| TcCLB.506775.90  | PIF1 helicase-like protein, putative                       | 1,519 | 1,196E-70 |
| TcCLB.509153.90  | dihydrofolate reductase-thymidylate synthase               | 1,519 | 2,538E-68 |
| TcCLB.509045.29  | kinesin, putative                                          | 1,518 | 8,281E-22 |
| TcCLB.426799.9   | hypothetical protein, conserved (fragment)                 | 1,518 | 1,825E-11 |
| TcCLB.503841.10  | proteasome activator protein pa26, putative                | 1,517 | 5,343E-32 |
| TcCLB.507625.60  | dispersed gene family protein 1 (DGF-1, pseudogene), put   | 1,517 | 9,965E-25 |
| TcCLB.506147.190 | hypothetical protein, conserved                            | 1,516 | 1,177E-41 |
| TcCLB.510759.140 | hypothetical protein, conserved                            | 1,515 | 1,383E-41 |
| TcCLB.503683.11  | RNA-binding protein, putative                              | 1,515 | 2,996E-12 |
| TcCLB.509611.30  | hypothetical protein                                       | 1,514 | 1,059E-37 |
| TcCLB.505999.4   | hypothetical protein, conserved                            | 1,513 | 2,099E-20 |
| TcCLB.505945.10  | DNA repair and recombination helicase protein PIF5, puta   | 1,511 | 3,166E-56 |
| TcCLB.509337.5   | hypothetical protein, conserved (pseudogene)               | 1,511 | 2,038E-36 |
| TcCLB.511909.60  | hypothetical protein, conserved                            | 1,51  | 3,207E-29 |
| TcCLB.509237.90  | hypothetical protein, conserved                            | 1,51  | 3,414E-21 |
| TcCLB.508799.240 | aminopeptidase, putative                                   | 1,509 | 1,352E-59 |
| TcCLB.503829.80  | hypothetical potein, conserved                             | 1,508 | 9,812E-66 |
| TcCLB.508317.30  | hypothetical protein                                       | 1,508 | 1,739E-49 |
| TcCLB.506777.50  | cell cycle sequence binding phosphoprotein (RBP45), puta   | 1,508 | 6,814E-45 |
| TcCLB.508333.9   | dispersed gene family protein 1 (DGF-1), putative (fragme  | 1,508 | 3,404E-06 |
| TcCLB.503939.114 | hypothetical protein, conserved                            | 1,506 | 3,945E-28 |
| TcCLB.426071.10  | dispersed gene family protein 1 (DGF-1), putative (fragme  | 1,506 | 2,88E-08  |
| TcCLB.510133.9   | dispersed gene family protein 1 (DGF-1), putative (fragme  | 1,506 | 1,325E-06 |
| TcCLB.511625.74  | hypothetical protein, conserved                            | 1,505 | 1,144E-44 |
| TcCLB.508641.200 | hypothetical protein, conserved                            | 1,505 | 1,023E-34 |
| TcCLB.510453.9   | dispersed gene family protein 1 (DGF-1), putative          | 1,505 | 5,358E-06 |
| TcCLB.507611.10  | retrotransposon hot spot (RHS) protein, putative           | 1,504 | 1,165E-60 |
| TcCLB.504161.20  | hypothetical protein, conserved                            | 1,504 | 8,344E-54 |
| TcCLB.503599.60  | hypothetical protein, conserved                            | 1,504 | 7,514E-24 |
| TcCLB.506675.70  | dispersed gene family protein 1 (DGF-1), putative          | 1,504 | 1,027E-15 |
| TcCLB.510101.90  | hypothetical protein, conserved                            | 1,503 | 5,65E-79  |
| TcCLB.510723.29  | 1-acyl-sn-glycerol-3-phosphate acyltransferase, putative ( | 1,503 | 1,418E-36 |
| TcCLB.506405.43  | hypothetical protein, conserved                            | 1,503 | 2,176E-29 |



|                  |                                                            |       |            |
|------------------|------------------------------------------------------------|-------|------------|
| TcCLB.508023.140 | dispersed gene family protein 1 (DGF-1), putative          | 1,503 | 5,723E-21  |
| TcCLB.508369.20  | squalene synthase, putative                                | 1,501 | 4,493E-98  |
| TcCLB.509047.10  | hypothetical protein                                       | 1,501 | 4,621E-38  |
| TcCLB.511827.64  | hypothetical protein, conserved                            | 1,5   | 3,027E-45  |
| TcCLB.444777.10  | drug resistance protein, putative                          | 1,5   | 8,332E-12  |
| TcCLB.511261.20  | chaperone DNAJ protein, putative                           | 1,499 | 1,419E-44  |
| TcCLB.508257.70  | phosphomannomutase-like protein, putative                  | 1,498 | 5,864E-40  |
| TcCLB.505757.20  | transcriptional regulator, putative                        | 1,498 | 6,421E-26  |
| TcCLB.508043.20  | metallo-beta-lactamase-like protein, putative              | 1,495 | 5,471E-44  |
| TcCLB.508799.230 | hypothetical protein, conserved                            | 1,495 | 3,454E-40  |
| TcCLB.506405.120 | V-type ATPase, A subunit, putative                         | 1,494 | 1,998E-98  |
| TcCLB.507167.240 | retrotransposon hot spot (RHS) protein, putative           | 1,493 | 3,301E-25  |
| TcCLB.510347.29  | hypothetical protein, conserved                            | 1,493 | 2,042E-14  |
| TcCLB.507659.20  | amino acid transporter, putative                           | 1,491 | 1,834E-103 |
| TcCLB.508989.9   | nucleoside phosphorylase, putative                         | 1,491 | 1,164E-63  |
| TcCLB.509649.20  | hypothetical protein                                       | 1,49  | 8,171E-37  |
| TcCLB.510307.60  | retrotransposon hot spot protein (RHS, pseudogene), puta   | 1,489 | 7,849E-68  |
| TcCLB.511733.10  | aldehyde dehydrogenase, putative                           | 1,488 | 2,591E-40  |
| TcCLB.506337.50  | hypothetical protein, conserved                            | 1,487 | 6,925E-54  |
| TcCLB.507221.60  | oxidoreductase-like protein (pseudogene), putative         | 1,487 | 1,857E-29  |
| TcCLB.508195.10  | UDP-Gal or UDP-GlcNAc-dependent glycosyltransferase, $\mu$ | 1,487 | 9,649E-25  |
| TcCLB.506693.20  | hypothetical protein, conserved                            | 1,485 | 2,679E-35  |
| TcCLB.504625.99  | protein tyrosine phosphatase, putative (fragment)          | 1,485 | 1,376E-14  |
| TcCLB.505207.30  | retrotransposon hot spot (RHS) protein, putative           | 1,484 | 7,43E-46   |
| TcCLB.506631.30  | hypothetical protein, conserved                            | 1,484 | 1,151E-43  |
| TcCLB.507927.100 | hypothetical protein                                       | 1,483 | 5,633E-55  |
| TcCLB.508153.130 | enoyl-CoA hydratase, mitochondrial precursor, putative     | 1,482 | 1,164E-48  |
| TcCLB.506687.10  | retrotransposon hot spot protein (RHS, pseudogene), puta   | 1,482 | 1,179E-35  |
| TcCLB.507063.10  | hypothetical protein                                       | 1,482 | 1,454E-30  |
| TcCLB.503971.10  | hypothetical protein, conserved                            | 1,481 | 2,795E-68  |
| TcCLB.506821.210 | cytochrome-b5 reductase, putative                          | 1,481 | 1,594E-51  |
| TcCLB.504557.20  | UDP-Gal or UDP-GlcNAc-dependent glycosyltransferase, $\mu$ | 1,479 | 1,269E-24  |
| TcCLB.509797.40  | isoleucyl-tRNA synthetase, putative                        | 1,478 | 1,071E-65  |
| TcCLB.508975.10  | acyl-CoA dehydrogenase, mitochondrial precursor, putativ   | 1,478 | 6,923E-54  |
| TcCLB.510357.140 | hypothetical protein, conserved                            | 1,477 | 6,483E-21  |
| TcCLB.507935.10  | mucin-like glycoprotein (pseudogene), putative             | 1,477 | 0,0001097  |
| TcCLB.506287.209 | DNA ligase, putative                                       | 1,476 | 1,043E-39  |
| TcCLB.510659.240 | lactoylglutathione lyase-like protein, putative            | 1,476 | 2,907E-32  |
| TcCLB.509715.90  | UDP-glucose/GDP-mannose dehydrogenase family, NAD $\kappa$ | 1,476 | 8,63E-22   |
| TcCLB.508219.140 | retrotransposon hot spot protein (RHS, pseudogene), puta   | 1,476 | 3,042E-09  |
| TcCLB.511417.70  | histone-lysine N-methyltransferase, putative (DOT1B)       | 1,475 | 2,147E-45  |
| TcCLB.504077.30  | hypothetical protein, conserved                            | 1,472 | 2,966E-32  |
| TcCLB.510581.20  | receptor-type adenylate cyclase, putative                  | 1,47  | 5,27E-23   |
| TcCLB.510509.50  | mitochondrial RNA binding protein, putative                | 1,469 | 1,011E-34  |
| TcCLB.511843.80  | retrotransposon hot spot (RHS) protein, putative           | 1,469 | 2,968E-27  |

|                  |                                                           |       |            |
|------------------|-----------------------------------------------------------|-------|------------|
| TcCLB.504741.140 | esterase, putative                                        | 1,467 | 1,32E-26   |
| TcCLB.508837.189 | endoplasmic reticulum oxidoreductin, putative             | 1,466 | 1,695E-33  |
| TcCLB.507001.110 | galactokinase-like protein, putative                      | 1,466 | 3,143E-32  |
| TcCLB.504153.370 | hypothetical protein                                      | 1,465 | 7,324E-44  |
| TcCLB.506777.64  | hypothetical protein, conserved                           | 1,465 | 6,287E-25  |
| TcCLB.504065.10  | retrotransposon hot spot protein (RHS, pseudogene), puta  | 1,464 | 6,328E-36  |
| TcCLB.482471.19  | ATP-dependent RNA helicase SUB2, putative (fragment) (    | 1,464 | 5,329E-32  |
| TcCLB.506195.210 | hypothetical protein, conserved                           | 1,463 | 5,385E-52  |
| TcCLB.507681.210 | Flagellar Member 2 (FLAM2)                                | 1,461 | 1,008E-97  |
| TcCLB.506223.40  | hypothetical protein, conserved                           | 1,461 | 1,674E-30  |
| TcCLB.511005.10  | retrotransposon hot spot (RHS) protein, putative (fragmer | 1,461 | 1,648E-27  |
| TcCLB.503843.20  | hypothetical protein, conserved                           | 1,46  | 1,182E-55  |
| TcCLB.468405.9   | dispersed gene family protein 1 (DGF-1), putative         | 1,46  | 0,000296   |
| TcCLB.506469.148 | hypothetical protein, conserved                           | 1,459 | 1,239E-40  |
| TcCLB.503499.20  | hypothetical protein, conserved                           | 1,459 | 1,099E-28  |
| TcCLB.510091.80  | pyruvate dehydrogenase E1 beta subunit, putative          | 1,458 | 6,413E-62  |
| TcCLB.503721.39  | heat shock 70 kDa protein, putative                       | 1,458 | 5,562E-47  |
| TcCLB.509911.74  | hypothetical protein, conserved                           | 1,458 | 5,377E-38  |
| TcCLB.508609.10  | surface protease GP63, putative                           | 1,458 | 9,546E-34  |
| TcCLB.506873.4   | ATP-dependent DNA DEAD/DEAH box helicase, putative (f     | 1,457 | 6,412E-18  |
| TcCLB.506945.20  | PAS-domain containing phosphoglycerate kinase, putative   | 1,455 | 1,107E-49  |
| TcCLB.511179.150 | alanine racemase, putative                                | 1,455 | 2,135E-27  |
| TcCLB.506529.516 | ATP synthase subunit, putative                            | 1,455 | 1,692E-16  |
| TcCLB.507695.14  | dispersed gene family protein 1 (DGF-1), putative         | 1,454 | 0,00009188 |
| TcCLB.508079.10  | conserved protein                                         | 1,453 | 6,734E-65  |
| TcCLB.507645.59  | hypothetical protein, conserved                           | 1,453 | 1,713E-16  |
| TcCLB.511025.110 | dihydrolipoyl dehydrogenase, putative (GCVL-2)            | 1,452 | 1,898E-46  |
| TcCLB.504207.20  | hypothetical protein, conserved                           | 1,45  | 3,027E-65  |
| TcCLB.503847.80  | hypothetical protein, conserved                           | 1,45  | 5,098E-34  |
| TcCLB.504867.129 | hypothetical protein, conserved                           | 1,45  | 9,238E-30  |
| TcCLB.508817.130 | carbonic anhydrase-like protein, putative                 | 1,449 | 3,677E-64  |
| TcCLB.507821.70  | dispersed gene family protein 1 (DGF-1, pseudogene), put  | 1,448 | 1,854E-13  |
| TcCLB.508479.500 | retrotransposon hot spot (RHS) protein, putative          | 1,447 | 9,347E-54  |
| TcCLB.506779.20  | hypothetical protein, conserved                           | 1,447 | 2,689E-49  |
| TcCLB.511641.10  | hypothetical protein, conserved                           | 1,447 | 1,997E-23  |
| TcCLB.505401.19  | dispersed gene family protein 1 (DGF-1), putative (fragme | 1,447 | 5,515E-14  |
| TcCLB.511755.119 | hypothetical protein, conserved (fragment)                | 1,446 | 4,732E-66  |
| TcCLB.509875.170 | pyruvate dehydrogenase (lipoamide) kinase, putative       | 1,446 | 6,471E-42  |
| TcCLB.511151.80  | hypothetical protein, conserved                           | 1,446 | 1,485E-40  |
| TcCLB.508569.80  | phosphoacetylglucosamine mutase, putative                 | 1,446 | 5,245E-35  |
| TcCLB.505373.30  | retrotransposon hot spot protein (RHS, pseudogene), puta  | 1,446 | 6,746E-18  |
| TcCLB.511887.10  | retrotransposon hot spot protein (RHS, pseudogene), puta  | 1,442 | 8,071E-20  |
| TcCLB.510449.10  | dispersed gene family protein 1 (DGF-1), putative         | 1,441 | 2,612E-13  |
| TcCLB.511825.200 | 60S ribosomal protein L14, putative                       | 1,44  | 5,255E-68  |
| TcCLB.510121.160 | DNA topoisomerase IA, putative                            | 1,44  | 9,524E-53  |

|                  |                                                              |       |            |
|------------------|--------------------------------------------------------------|-------|------------|
| TcCLB.508677.160 | hypothetical protein, conserved                              | 1,44  | 3,31E-38   |
| TcCLB.510099.120 | D-isomer specific 2-hydroxyacid dehydrogenase-protein, p     | 1,439 | 1,156E-117 |
| TcCLB.509335.10  | retrotransposon hot spot (RHS) protein, putative             | 1,439 | 1,127E-61  |
| TcCLB.508027.110 | pyroglutamyl-peptidase I, putative (PPI)                     | 1,439 | 2,014E-37  |
| TcCLB.510581.9   | receptor-type adenylate cyclase, putative (fragment)         | 1,439 | 3,763E-21  |
| TcCLB.507221.40  | hypothetical protein                                         | 1,439 | 1,899E-20  |
| TcCLB.508677.134 | hypothetical protein, conserved                              | 1,438 | 4,758E-21  |
| TcCLB.506537.299 | retrotransposon hot spot (RHS) protein, putative             | 1,436 | 5,38E-57   |
| TcCLB.507709.60  | hypothetical protein, conserved                              | 1,435 | 7,243E-55  |
| TcCLB.508965.14  | multidrug resistance protein E, putative (MRPE)              | 1,435 | 1,59E-48   |
| TcCLB.509799.5   | hypothetical protein, conserved                              | 1,435 | 4,672E-31  |
| TcCLB.506583.70  | cytosolic factor SEC14, putative                             | 1,435 | 5,288E-23  |
| TcCLB.511431.54  | hypothetical protein                                         | 1,435 | 1,027E-09  |
| TcCLB.507089.240 | hypothetical protein, conserved                              | 1,434 | 2,496E-26  |
| TcCLB.507143.80  | hypothetical protein, conserved                              | 1,433 | 2,706E-16  |
| TcCLB.507093.69  | hypothetical protein, conserved                              | 1,432 | 9,746E-17  |
| TcCLB.507565.10  | dispersed gene family protein 1 (DGF-1, pseudogene), put     | 1,432 | 8,633E-09  |
| TcCLB.509647.13  | hypothetical protein, conserved (fragment)                   | 1,431 | 1,446E-62  |
| TcCLB.510759.120 | rieske iron-sulfur protein, mitochondrial precursor, putativ | 1,43  | 4,049E-63  |
| TcCLB.503599.70  | hypothetical protein, conserved                              | 1,43  | 6,958E-25  |
| TcCLB.503527.4   | hypothetical protein, conserved (pseudogene)                 | 1,429 | 9,501E-39  |
| TcCLB.473633.9   | dispersed gene family protein 1 (DGF-1), putative (fragm     | 1,429 | 4,199E-08  |
| TcCLB.511827.30  | hypothetical protein                                         | 1,428 | 2,412E-39  |
| TcCLB.503505.20  | MFS transporter, putative                                    | 1,428 | 2,615E-24  |
| TcCLB.507023.70  | hypothetical protein, conserved                              | 1,428 | 9,026E-19  |
| TcCLB.506925.310 | hypothetical protein, conserved                              | 1,427 | 1,97E-103  |
| TcCLB.506247.310 | hypothetical protein, conserved                              | 1,427 | 3,492E-57  |
| TcCLB.509067.70  | pyrroline-5-carboxylate synthetase-like protein, putative    | 1,426 | 2,211E-45  |
| TcCLB.510345.9   | protein kinase, putative (fragment)                          | 1,426 | 2,83E-12   |
| TcCLB.506977.49  | ribosomal protein L36, putative                              | 1,425 | 2,404E-74  |
| TcCLB.508375.89  | fucose kinase, putative (fragment)                           | 1,425 | 2,577E-07  |
| TcCLB.511067.30  | transketolase, putative                                      | 1,424 | 1,153E-56  |
| TcCLB.506517.149 | hypothetical protein, conserved                              | 1,424 | 1,342E-34  |
| TcCLB.507517.50  | hypothetical protein                                         | 1,424 | 2,748E-19  |
| TcCLB.506417.83  | multidrug resistance-associated protein (pseudogene), pu     | 1,423 | 3,226E-36  |
| TcCLB.507711.90  | procyclic form surface phosphoprotein, putative              | 1,423 | 2,63E-31   |
| TcCLB.510349.10  | hypothetical protein, conserved                              | 1,423 | 4,688E-25  |
| TcCLB.506713.24  | hypothetical protein, conserved                              | 1,423 | 4,42E-13   |
| TcCLB.508175.100 | hypothetical protein                                         | 1,422 | 2,398E-41  |
| TcCLB.511153.70  | hypothetical protein, conserved                              | 1,422 | 2,283E-33  |
| TcCLB.509153.10  | hypothetical protein, conserved                              | 1,421 | 5,213E-60  |
| TcCLB.508637.63  | hypothetical protein, conserved                              | 1,421 | 1,509E-42  |
| TcCLB.506823.80  | retrotransposon hot spot protein (RHS, pseudogene), puta     | 1,421 | 2,86E-21   |
| TcCLB.511217.200 | tyrosyl or methionyl-tRNA synthetase, putative               | 1,42  | 6,674E-34  |
| TcCLB.508335.9   | dispersed gene family protein 1 (DGF-1), putative            | 1,42  | 3,973E-11  |

|                  |                                                                    |       |            |
|------------------|--------------------------------------------------------------------|-------|------------|
| TcCLB.507195.60  | hypothetical protein                                               | 1,42  | 0,006706   |
| TcCLB.509461.60  | mitochondrial RNA binding protein, putative                        | 1,419 | 2,995E-65  |
| TcCLB.508637.140 | hypothetical protein, conserved                                    | 1,419 | 1,646E-39  |
| TcCLB.511809.10  | hypothetical protein                                               | 1,419 | 3,679E-32  |
| TcCLB.508417.29  | dispersed gene family protein 1 (DGF-1), putative (fragment)       | 1,419 | 2,528E-19  |
| TcCLB.507677.80  | hypothetical protein, conserved                                    | 1,417 | 1,202E-10  |
| TcCLB.511761.60  | hypothetical protein, conserved                                    | 1,415 | 4,464E-24  |
| TcCLB.508927.20  | glycosomal transporter (GAT1), putative (GAT1)                     | 1,414 | 3,97E-28   |
| TcCLB.506683.180 | dispersed gene family protein 1 (DGF-1), putative                  | 1,414 | 1,518E-20  |
| TcCLB.504137.50  | hypothetical protein, conserved                                    | 1,413 | 1,137E-21  |
| TcCLB.511523.100 | aldehyde dehydrogenase, putative                                   | 1,412 | 3,595E-49  |
| TcCLB.506147.100 | hypothetical protein, conserved                                    | 1,412 | 1,159E-43  |
| TcCLB.509159.10  | ATP-dependent DNA DEAD/DEAH box helicase, putative (fragment)      | 1,412 | 7,261E-43  |
| TcCLB.511471.120 | retrotransposon hot spot protein (RHS, pseudogene), putative       | 1,412 | 1,02E-41   |
| TcCLB.507009.70  | hypothetical protein, conserved                                    | 1,412 | 4,665E-31  |
| TcCLB.511573.40  | Mitogen-activated protein kinase 10, putative (MPK10)              | 1,41  | 6,89E-40   |
| TcCLB.509463.20  | hypothetical protein, conserved                                    | 1,409 | 6,395E-33  |
| TcCLB.506363.70  | amidohydrolase, putative                                           | 1,409 | 1,011E-18  |
| TcCLB.508373.10  | glutamine dependent carbamoyl-phosphate synthase, putative         | 1,408 | 4,303E-43  |
| TcCLB.508567.70  | peptidyl-prolyl cis-trans isomerase (PIN1)                         | 1,408 | 4,02E-36   |
| TcCLB.510577.50  | rhomboid-like protein, putative                                    | 1,407 | 2,096E-70  |
| TcCLB.503939.110 | hypothetical protein, conserved                                    | 1,407 | 4,523E-41  |
| TcCLB.508461.10  | Present in the outer mitochondrial membrane proteome (fragment)    | 1,407 | 1,534E-33  |
| TcCLB.508319.40  | ATP-dependent RNA helicase SUB2, putative (SUB2)                   | 1,406 | 9,648E-68  |
| TcCLB.507659.30  | amino acid transporter, putative (fragment)                        | 1,406 | 1,235E-64  |
| TcCLB.510901.230 | hypothetical protein, conserved                                    | 1,405 | 5,498E-35  |
| TcCLB.507993.290 | hypothetical protein, conserved                                    | 1,405 | 1,794E-26  |
| TcCLB.506843.40  | retrotransposon hot spot (RHS) protein, putative                   | 1,403 | 7,85E-77   |
| TcCLB.506053.20  | hypothetical protein, conserved                                    | 1,403 | 3,82E-22   |
| TcCLB.506571.10  | dispersed gene family protein 1 (DGF-1), putative                  | 1,403 | 1,146E-13  |
| TcCLB.510039.90  | 60S ribosomal protein L35, putative                                | 1,402 | 3,825E-85  |
| TcCLB.508399.49  | dispersed gene family protein 1 (DGF-1), putative                  | 1,402 | 1,394E-15  |
| TcCLB.506529.430 | alanine aminotransferase, putative                                 | 1,402 | 6,025E-10  |
| TcCLB.510065.30  | translationally controlled tumor protein (TCTP), putative          | 1,4   | 4,523E-100 |
| TcCLB.511809.30  | hypothetical protein, conserved                                    | 1,4   | 4,469E-46  |
| TcCLB.510811.10  | protein associated with differentiation 4, putative                | 1,4   | 4,788E-21  |
| TcCLB.507669.220 | hypothetical protein, conserved                                    | 1,399 | 1,832E-36  |
| TcCLB.511803.15  | dynein light chain lc6, flagellar outer arm (pseudogene), putative | 1,399 | 2,261E-15  |
| TcCLB.509365.20  | dispersed gene family protein 1 (DGF-1, pseudogene), putative      | 1,398 | 5,494E-16  |
| TcCLB.506529.300 | hypothetical protein, conserved                                    | 1,397 | 2,444E-59  |
| TcCLB.510345.50  | hypothetical protein, conserved                                    | 1,397 | 4,453E-44  |
| TcCLB.510843.10  | beta galactofuranosyl glycosyltransferase (pseudogene), putative   | 1,397 | 1,719E-37  |
| TcCLB.508815.20  | hypothetical protein, conserved                                    | 1,397 | 2,139E-28  |
| TcCLB.511213.89  | dispersed gene family protein 1 (DGF-1), putative (fragment)       | 1,397 | 5,923E-09  |
| TcCLB.509769.60  | succinate dehydrogenase iron-sulfur subunit (SDH2N)                | 1,396 | 2,603E-57  |

|                  |                                                                       |       |           |
|------------------|-----------------------------------------------------------------------|-------|-----------|
| TcCLB.506401.120 | 40S ribosomal protein S9, putative                                    | 1,395 | 5,949E-71 |
| TcCLB.509999.140 | RNA-binding protein, putative                                         | 1,395 | 9,643E-11 |
| TcCLB.507159.60  | hypothetical protein, conserved                                       | 1,394 | 8,237E-71 |
| TcCLB.511649.70  | structural maintenance of chromosome 3 protein, putative              | 1,394 | 8,228E-21 |
| TcCLB.508507.24  | hypothetical protein, conserved                                       | 1,393 | 9,13E-20  |
| TcCLB.510105.20  | Ribosomal RNA processing protein 41A (RRP41A)                         | 1,392 | 3,599E-56 |
| TcCLB.507875.159 | 60S acidic ribosomal protein P2 (pseudogene), putative                | 1,391 | 2,078E-48 |
| TcCLB.506853.70  | hypothetical protein, conserved                                       | 1,391 | 3,354E-32 |
| TcCLB.508909.214 | hypothetical protein, conserved                                       | 1,39  | 1,131E-42 |
| TcCLB.511531.50  | glucosamine-6-phosphate isomerase, putative                           | 1,388 | 5,048E-50 |
| TcCLB.503873.10  | cytochrome-b5 reductase, putative                                     | 1,388 | 2,821E-46 |
| TcCLB.506777.80  | seryl-tRNA synthetase, putative                                       | 1,387 | 6,699E-97 |
| TcCLB.509099.10  | GTP-binding protein, putative                                         | 1,387 | 6,996E-38 |
| TcCLB.511643.30  | aspartate carbamoyltransferase, putative                              | 1,387 | 5,749E-37 |
| TcCLB.503749.5   | pyrroline-5-carboxylate synthetase-like protein, putative (truncated) | 1,386 | 6,012E-22 |
| TcCLB.509667.10  | dispersed gene family protein 1 (DGF-1), putative                     | 1,386 | 4,361E-15 |
| TcCLB.511825.230 | hypothetical protein                                                  | 1,385 | 2,414E-28 |
| TcCLB.507831.70  | pyruvate dehydrogenase E1 component alpha subunit, putative           | 1,385 | 6,093E-27 |
| TcCLB.504153.330 | hypothetical protein, conserved                                       | 1,384 | 3,247E-62 |
| TcCLB.506247.370 | hypothetical protein, conserved                                       | 1,384 | 3,479E-48 |
| TcCLB.503543.20  | divalent cation transporter, putative (fragment)                      | 1,383 | 1,799E-45 |
| TcCLB.504423.20  | electron transport protein SCO1/SCO2, putative                        | 1,383 | 4,231E-43 |
| TcCLB.505919.31  | hypothetical protein, conserved (pseudogene)                          | 1,383 | 3,554E-21 |
| TcCLB.510131.30  | hypothetical protein, conserved                                       | 1,382 | 7,584E-45 |
| TcCLB.511649.90  | hypothetical protein, conserved                                       | 1,382 | 7,353E-36 |
| TcCLB.511389.120 | hypothetical protein, conserved                                       | 1,381 | 7,714E-31 |
| TcCLB.511383.80  | hypothetical protein, conserved                                       | 1,381 | 4,527E-23 |
| TcCLB.430605.40  | ERV/ALR sulfhydryl oxidase domain-containing protein (P1)             | 1,38  | 1,091E-34 |
| TcCLB.508027.60  | hypothetical protein                                                  | 1,379 | 3,722E-42 |
| TcCLB.507003.60  | hypothetical protein, conserved                                       | 1,378 | 4,72E-32  |
| TcCLB.507167.50  | hypothetical protein, conserved (pseudogene)                          | 1,378 | 2,083E-19 |
| TcCLB.507857.70  | hypothetical protein, conserved                                       | 1,377 | 3,315E-34 |
| TcCLB.509455.114 | Protein of unknown function (DUF1295), putative (POMP2)               | 1,377 | 3,225E-30 |
| TcCLB.504147.160 | ADP-ribosylation factor-like protein, putative                        | 1,376 | 1,53E-41  |
| TcCLB.510421.320 | pyruvate dehydrogenase E1 beta subunit, putative                      | 1,376 | 2,053E-37 |
| TcCLB.511529.68  | cyclin-dependent kinases regulatory subunit, putative (P1)            | 1,376 | 1,912E-32 |
| TcCLB.510309.10  | hypothetical protein, conserved                                       | 1,376 | 9,022E-30 |
| TcCLB.503479.30  | adenylate kinase 1                                                    | 1,375 | 2,652E-28 |
| TcCLB.510265.110 | hypothetical protein, conserved                                       | 1,375 | 0,0002624 |
| TcCLB.506925.104 | dynein light chain, putative                                          | 1,374 | 1,583E-57 |
| TcCLB.509441.10  | hypothetical protein, conserved                                       | 1,374 | 9,792E-41 |
| TcCLB.510657.40  | hypothetical protein, conserved                                       | 1,374 | 2,664E-29 |
| TcCLB.511105.29  | dispersed gene family protein 1 (DGF-1), putative                     | 1,374 | 1,117E-09 |
| TcCLB.503615.10  | UDP-Gal or UDP-GlcNAc-dependent glycosyltransferase, putative         | 1,371 | 5,289E-16 |
| TcCLB.511585.120 | hypothetical protein, conserved                                       | 1,37  | 7,63E-40  |

|                  |                                                           |       |           |
|------------------|-----------------------------------------------------------|-------|-----------|
| TcCLB.510173.90  | poly(ADP-ribose) polymerase, putative                     | 1,37  | 5,434E-35 |
| TcCLB.508399.10  | NADH-ubiquinone oxidoreductase, mitochondrial, putative   | 1,369 | 8,816E-38 |
| TcCLB.503697.40  | hypothetical protein                                      | 1,369 | 4,377E-17 |
| TcCLB.504255.4   | rhomboid-like protein                                     | 1,369 | 3,992E-08 |
| TcCLB.507723.90  | hypothetical protein, conserved                           | 1,367 | 1,458E-17 |
| TcCLB.508433.50  | retrotransposon hot spot protein (RHS, pseudogene), puta  | 1,367 | 0,0005453 |
| TcCLB.510103.30  | protein associated with differentiation 4, putative       | 1,366 | 1,264E-53 |
| TcCLB.506945.240 | ATP synthase, epsilon chain, putative                     | 1,366 | 1,459E-38 |
| TcCLB.506979.40  | hypothetical protein, conserved                           | 1,366 | 3,267E-26 |
| TcCLB.511443.10  | calpain-like cysteine peptidase (pseudogene), putative    | 1,366 | 2,106E-13 |
| TcCLB.506299.9   | dispersed gene family protein 1 (DGF-1), putative (fragme | 1,366 | 2,123E-13 |
| TcCLB.511867.130 | hypothetical protein, conserved                           | 1,365 | 3,779E-58 |
| TcCLB.507479.29  | retrotransposon hot spot protein (RHS, pseudogene), puta  | 1,365 | 2,371E-16 |
| TcCLB.509805.90  | hypothetical protein, conserved                           | 1,364 | 1,292E-44 |
| TcCLB.508909.320 | hypothetical protein                                      | 1,364 | 2,054E-34 |
| TcCLB.506859.170 | hypothetical protein, conserved                           | 1,363 | 1,159E-35 |
| TcCLB.509551.20  | Putrescine-cadaverine transporter 1, putative (POT1.2)    | 1,362 | 1,901E-35 |
| TcCLB.510883.10  | retrotransposon hot spot (RHS) protein, putative          | 1,362 | 1,67E-27  |
| TcCLB.510095.50  | dispersed gene family protein 1 (DGF-1), putative         | 1,362 | 1,897E-13 |
| TcCLB.508541.190 | cell cycle sequence binding phosphoprotein (RBP33), puta  | 1,361 | 2,538E-49 |
| TcCLB.506147.80  | Present in the outer mitochondrial membrane proteome (    | 1,361 | 2,224E-28 |
| TcCLB.509037.50  | aspartyl-tRNA synthetase, putative                        | 1,36  | 2,341E-40 |
| TcCLB.507445.9   | dispersed gene family protein 1 (DGF-1), putative (fragme | 1,36  | 7,497E-12 |
| TcCLB.507467.10  | receptor-type adenylate cyclase, putative (fragment)      | 1,36  | 3,766E-11 |
| TcCLB.506487.60  | endosomal integral membrane protein, putative (fragmer    | 1,36  | 1,905E-09 |
| TcCLB.508591.10  | dispersed gene family protein 1 (DGF-1), putative         | 1,359 | 1,287E-11 |
| TcCLB.509747.20  | 60S ribosomal protein L22, putative                       | 1,358 | 5,292E-64 |
| TcCLB.510307.140 | retrotransposon hot spot protein (RHS, pseudogene), puta  | 1,358 | 1,371E-33 |
| TcCLB.511335.19  | hypothetical protein, conserved (pseudogene)              | 1,358 | 1,82E-18  |
| TcCLB.508257.10  | serine-palmitoyl-CoA transferase, putative                | 1,358 | 1,567E-15 |
| TcCLB.508077.9   | conserved protein (fragment)                              | 1,357 | 3,921E-50 |
| TcCLB.508739.21  | mucin TcSMUGS (pseudogene), putative                      | 1,357 | 6,824E-34 |
| TcCLB.506535.10  | retrotransposon hot spot (RHS) protein, putative (fragmer | 1,357 | 1,518E-23 |
| TcCLB.506295.130 | prohibitin, putative                                      | 1,356 | 7,45E-33  |
| TcCLB.506063.31  | ATP-dependent DEAD/H RNA helicase (pseudogene), puta      | 1,355 | 0,001201  |
| TcCLB.503431.60  | acid phosphatase, putative (AP)                           | 1,354 | 1,537E-24 |
| TcCLB.509065.9   | aldehyde dehydrogenase, putative (fragment)               | 1,353 | 1,149E-48 |
| TcCLB.509437.60  | hypothetical protein, conserved                           | 1,353 | 6,35E-47  |
| TcCLB.511469.20  | hypothetical protein, conserved                           | 1,353 | 4,71E-46  |
| TcCLB.509191.9   | dispersed gene family protein 1 (DGF-1, pseudogene), put  | 1,353 | 9,626E-06 |
| TcCLB.507669.10  | fumarate hydratase, putative                              | 1,351 | 1,974E-32 |
| TcCLB.511249.44  | vacuolar transporter chaperone, putative                  | 1,349 | 1,142E-42 |
| TcCLB.508647.110 | Present in the outer mitochondrial membrane proteome 1    | 1,349 | 2,861E-40 |
| TcCLB.506405.50  | serine-palmitoyl-CoA transferase, putative                | 1,348 | 5,667E-58 |
| TcCLB.511771.80  | retrotransposon hot spot protein (RHS, pseudogene), puta  | 1,348 | 1,782E-27 |

|                  |                                                           |       |           |
|------------------|-----------------------------------------------------------|-------|-----------|
| TcCLB.503469.9   | dispersed gene family protein 1 (DGF-1), putative (fragme | 1,348 | 4,102E-16 |
| TcCLB.506417.10  | multidrug resistance protein A (pseudogene), putative     | 1,347 | 3,363E-86 |
| TcCLB.506517.30  | hypothetical protein                                      | 1,347 | 2,97E-39  |
| TcCLB.509791.120 | kinetoplast-associated protein (KAP6)                     | 1,347 | 1,179E-32 |
| TcCLB.509445.10  | tryparedoxin peroxidase, putative                         | 1,347 | 1,397E-19 |
| TcCLB.507611.270 | hypothetical protein, conserved                           | 1,347 | 4,576E-16 |
| TcCLB.507649.80  | nucleolar RNA-binding protein, putative                   | 1,346 | 3,169E-54 |
| TcCLB.507801.110 | hypothetical protein, conserved                           | 1,345 | 8,055E-38 |
| TcCLB.418185.50  | retrotransposon hot spot protein (RHS, pseudogene), puta  | 1,345 | 1,093E-29 |
| TcCLB.511579.9   | fatty acyl CoA syntetase 1, putative                      | 1,345 | 5,236E-12 |
| TcCLB.505843.49  | ERV/ALR sulfhydryl oxidase domain-containing protein (P   | 1,345 | 1,247E-09 |
| TcCLB.507993.330 | mevalonate-diphosphate decarboxylase, putative            | 1,344 | 2,836E-30 |
| TcCLB.506571.20  | retrotransposon hot spot protein (RHS, pseudogene), puta  | 1,344 | 3,742E-20 |
| TcCLB.506041.50  | cytochrome c oxidase assembly protein, putative           | 1,343 | 6,829E-25 |
| TcCLB.510355.200 | hypothetical protein, conserved                           | 1,343 | 9,183E-23 |
| TcCLB.506573.81  | ribosomal protein L39, putative                           | 1,343 | 1,291E-19 |
| TcCLB.510673.10  | dispersed gene family protein 1 (DGF-1, pseudogene), put  | 1,343 | 9,026E-17 |
| TcCLB.508277.40  | divalent cation transporter, putative                     | 1,342 | 1,026E-70 |
| TcCLB.503955.55  | hypothetical protein, conserved                           | 1,342 | 1,055E-21 |
| TcCLB.506825.150 | hypothetical protein, conserved                           | 1,34  | 7,129E-63 |
| TcCLB.508303.65  | thioredoxin-like protein, putative                        | 1,339 | 1,348E-20 |
| TcCLB.506977.70  | ATPase subunit 9, putative                                | 1,337 | 5,589E-46 |
| TcCLB.510235.10  | dispersed gene family protein 1 (DGF-1), putative         | 1,337 | 9,275E-10 |
| TcCLB.506295.190 | glycine dehydrogenase [decarboxylating] (pseudogene), p   | 1,337 | 2,789E-09 |
| TcCLB.508473.10  | retrotransposon hot spot (RHS) protein, putative          | 1,336 | 4,497E-37 |
| TcCLB.510355.190 | hypothetical protein                                      | 1,336 | 3,58E-18  |
| TcCLB.506401.320 | 60S ribosomal protein L7a, putative                       | 1,335 | 2,819E-58 |
| TcCLB.509167.140 | RNA-binding protein 42 (RNA-binding motif protein 42), p  | 1,335 | 4,634E-30 |
| TcCLB.509901.160 | hypothetical protein, conserved                           | 1,335 | 2,49E-20  |
| TcCLB.506691.64  | cytochrome c oxidase copper chaperone, putative           | 1,335 | 1,184E-11 |
| TcCLB.506411.10  | thimet oligopeptidase, putative                           | 1,334 | 1,224E-46 |
| TcCLB.504427.200 | poly(A)-specific ribonuclease PARN, putative              | 1,334 | 7,051E-36 |
| TcCLB.510355.90  | dispersed gene family protein 1 (DGF-1), putative         | 1,334 | 7,502E-19 |
| TcCLB.506651.9   | dispersed gene family protein 1 (DGF-1), putative         | 1,334 | 1,543E-08 |
| TcCLB.506945.110 | casein kinase 1 isoform 2, putative                       | 1,333 | 1,018E-42 |
| TcCLB.509279.10  | hypothetical protein, conserved                           | 1,333 | 2,681E-13 |
| TcCLB.506629.30  | guide RNA-binding protein of 21 kDa (gBP21)               | 1,331 | 2,648E-44 |
| TcCLB.508119.120 | GDP-mannose 4,6 dehydratase, putative                     | 1,331 | 3,645E-41 |
| TcCLB.506635.139 | kasal-type serpin (pseudogene), putative                  | 1,331 | 1,057E-26 |
| TcCLB.510101.330 | hypothetical protein, conserved                           | 1,33  | 1,087E-41 |
| TcCLB.506999.50  | hypothetical protein, conserved                           | 1,33  | 2,441E-34 |
| TcCLB.511657.40  | hypothetical protein, conserved                           | 1,33  | 1,824E-25 |
| TcCLB.506675.30  | retrotransposon hot spot protein (RHS, pseudogene), puta  | 1,329 | 9,393E-37 |
| TcCLB.504163.110 | N-acetyltransferase subunit Nat1, putative                | 1,327 | 1,591E-42 |
| TcCLB.511353.10  | FK506-binding protein (FKBP)-type peptidyl-prolyl isomer  | 1,327 | 8,014E-27 |

|                  |                                                               |       |            |
|------------------|---------------------------------------------------------------|-------|------------|
| TcCLB.508153.994 | cytochrome c oxidase copper chaperone, putative               | 1,327 | 2,352E-12  |
| TcCLB.508247.149 | dispersed gene family protein 1 (DGF-1), putative             | 1,327 | 0,003828   |
| TcCLB.509207.40  | hypothetical protein, conserved                               | 1,326 | 3,781E-63  |
| TcCLB.507867.60  | protein phosphatase 1, regulatory subunit, putative           | 1,326 | 3,451E-33  |
| TcCLB.508411.10  | cofilin/actin depolymerizing factor, putative                 | 1,325 | 9,008E-34  |
| TcCLB.511847.30  | hypothetical protein, conserved                               | 1,325 | 7,911E-29  |
| TcCLB.506537.60  | dispersed gene family protein 1 (DGF-1, pseudogene), putative | 1,325 | 1,127E-19  |
| TcCLB.511625.50  | GTP-binding protein, putative                                 | 1,324 | 3,091E-44  |
| TcCLB.508503.30  | hypothetical protein                                          | 1,324 | 1,65E-23   |
| TcCLB.481099.9   | dispersed gene family protein 1 (DGF-1), putative (fragment)  | 1,322 | 5,356E-07  |
| TcCLB.417993.10  | dispersed gene family protein 1 (DGF-1, pseudogene), putative | 1,322 | 0,05335    |
| TcCLB.506195.290 | hypothetical protein, conserved                               | 1,321 | 3,422E-30  |
| TcCLB.506779.80  | pantothenate kinase subunit, putative                         | 1,321 | 4,784E-29  |
| TcCLB.503823.84  | DNA-directed RNA polymerase I subunit, putative               | 1,321 | 1,594E-20  |
| TcCLB.510381.10  | cystathionine beta-synthase, putative                         | 1,321 | 9,964E-08  |
| TcCLB.511145.50  | vacuolar ATP synthase, putative                               | 1,32  | 4,461E-57  |
| TcCLB.506357.40  | Elongation factor Tu, mitochondrial, putative (EF-Tu)         | 1,32  | 3,693E-48  |
| TcCLB.508241.50  | surface protease GP63, putative                               | 1,319 | 1,44E-33   |
| TcCLB.506189.20  | hypothetical protein, conserved                               | 1,319 | 4,917E-20  |
| TcCLB.504055.40  | dihydroxyacetone phosphate acyltransferase, putative (DA)     | 1,318 | 1,252E-48  |
| TcCLB.511825.180 | ATP-dependent DEAD/H RNA helicase, putative                   | 1,318 | 7,835E-46  |
| TcCLB.510301.10  | fructose-bisphosphate aldolase, glycosomal, putative          | 1,318 | 2,795E-38  |
| TcCLB.508823.100 | hypothetical protein, conserved                               | 1,318 | 2,184E-24  |
| TcCLB.506195.110 | malate dehydrogenase, putative                                | 1,317 | 5,836E-76  |
| TcCLB.510101.50  | lanosterol 14-alpha-demethylase, putative                     | 1,316 | 1,509E-78  |
| TcCLB.509331.110 | hypothetical protein, conserved                               | 1,316 | 2,158E-32  |
| TcCLB.506327.99  | serine/threonine protein kinase, putative (fragment)          | 1,316 | 6,499E-32  |
| TcCLB.510225.20  | hypothetical protein, conserved                               | 1,316 | 5,004E-20  |
| TcCLB.510105.170 | dihydrolipoamide acetyltransferase precursor, putative        | 1,315 | 2,916E-51  |
| TcCLB.510821.60  | ribonucleoprotein p18, mitochondrial precursor, putative      | 1,314 | 7,069E-51  |
| TcCLB.503715.10  | splicing factor TSR1, putative                                | 1,314 | 2,092E-50  |
| TcCLB.504269.20  | GPR1/FUN34/yaaH family, putative                              | 1,314 | 3,05E-36   |
| TcCLB.506863.20  | hypothetical protein                                          | 1,314 | 4,149E-23  |
| TcCLB.506443.70  | glutathione-S-transferase/glutaredoxin, putative              | 1,314 | 5,103E-22  |
| TcCLB.510785.20  | pteridine reductase (pseudogene), putative                    | 1,313 | 8,978E-58  |
| TcCLB.510853.73  | retrotransposon hot spot protein (pseudogene), putative       | 1,313 | 1,136E-55  |
| TcCLB.506485.80  | oxidoreductase, putative                                      | 1,313 | 1,006E-42  |
| TcCLB.511217.130 | hypothetical protein, conserved                               | 1,313 | 2,709E-41  |
| TcCLB.508371.10  | glutamine-dependent carbamoyl-phosphate synthetase (p)        | 1,313 | 4,858E-21  |
| TcCLB.510603.60  | protein tyrosine phosphatase-like protein, putative           | 1,313 | 2,174E-15  |
| TcCLB.506147.50  | hypothetical protein, conserved                               | 1,312 | 3,659E-26  |
| TcCLB.505035.10  | hypothetical protein                                          | 1,312 | 1,296E-17  |
| TcCLB.510105.40  | cullin-like protein, putative                                 | 1,311 | 1,23E-46   |
| TcCLB.503809.140 | cation transporter, putative                                  | 1,311 | 7,609E-32  |
| TcCLB.509713.20  | protein associated with differentiation 4, putative           | 1,309 | 1,432E-102 |



|                  |                                                               |       |            |
|------------------|---------------------------------------------------------------|-------|------------|
| TcCLB.503411.20  | hypothetical protein, conserved                               | 1,309 | 4,66E-25   |
| TcCLB.509769.66  | hypothetical protein, conserved                               | 1,309 | 5,396E-25  |
| TcCLB.507479.51  | beta galactofuranosyl glycosyltransferase, putative           | 1,309 | 7,706E-06  |
| TcCLB.508023.120 | hypothetical protein, conserved (pseudogene)                  | 1,308 | 1,058E-46  |
| TcCLB.508089.50  | hypothetical protein, conserved                               | 1,308 | 1,1E-30    |
| TcCLB.506399.70  | hypothetical protein, conserved                               | 1,308 | 3,388E-18  |
| TcCLB.457101.30  | multidrug resistance protein E, putative                      | 1,307 | 2,461E-24  |
| TcCLB.511439.30  | lipase, putative                                              | 1,307 | 5,325E-15  |
| TcCLB.506669.4   | MFS transporter, putative                                     | 1,307 | 9,275E-08  |
| TcCLB.508351.40  | cytochrome c oxidase assembly factor, putative                | 1,306 | 5,755E-26  |
| TcCLB.506717.10  | fatty acid elongase, putative                                 | 1,306 | 2,408E-17  |
| TcCLB.511817.270 | hypothetical protein, conserved                               | 1,305 | 6,014E-41  |
| TcCLB.508153.270 | heat shock protein 20, putative                               | 1,305 | 3,313E-27  |
| TcCLB.511441.20  | calpain-like cysteine peptidase, putative (fragment)          | 1,305 | 0,006618   |
| TcCLB.508535.30  | hypothetical protein, conserved                               | 1,304 | 4,724E-29  |
| TcCLB.511815.100 | hypothetical protein, conserved                               | 1,304 | 5,273E-21  |
| TcCLB.509549.100 | hypothetical protein, conserved                               | 1,303 | 4,153E-49  |
| TcCLB.509747.40  | hypothetical protein, conserved                               | 1,303 | 1,297E-30  |
| TcCLB.511211.30  | hypothetical protein                                          | 1,303 | 1,862E-20  |
| TcCLB.504163.60  | hypothetical protein, conserved                               | 1,302 | 4,58E-33   |
| TcCLB.436137.9   | dispersed gene family protein 1 (DGF-1), putative (fragment)  | 1,302 | 1,018E-15  |
| TcCLB.504033.21  | UDP-Gal or UDP-GlcNAc-dependent glycosyltransferase, putative | 1,302 | 0,00000263 |
| TcCLB.432867.20  | hypothetical protein, conserved                               | 1,301 | 1,312E-07  |
| TcCLB.506211.140 | hypothetical protein, conserved                               | 1,3   | 1,626E-49  |
| TcCLB.508231.9   | hexose transporter, putative                                  | 1,3   | 4,727E-17  |
| TcCLB.507121.40  | beta galactofuranosyl glycosyltransferase, putative           | 1,3   | 1,001E-08  |
| TcCLB.507831.20  | hypothetical protein, conserved                               | 1,3   | 0,00266    |
| TcCLB.509237.30  | glycosomal transporter (GAT1), putative (GAT1)                | 1,299 | 8,054E-34  |
| TcCLB.503453.64  | hypothetical protein, conserved                               | 1,299 | 7,361E-23  |
| TcCLB.506925.64  | hypothetical protein, conserved                               | 1,297 | 2,247E-43  |
| TcCLB.511417.80  | phosphate-repressible phosphate permease, putative            | 1,297 | 4,767E-38  |
| TcCLB.506629.50  | hypothetical protein, conserved                               | 1,297 | 2,932E-29  |
| TcCLB.511771.132 | ATP-dependent DEAD/H RNA helicase (pseudogene), putative      | 1,297 | 0,0006505  |
| TcCLB.511311.80  | hypothetical protein, conserved                               | 1,296 | 4,641E-68  |
| TcCLB.508119.200 | hypothetical protein                                          | 1,295 | 3,405E-36  |
| TcCLB.511367.70  | dihydrolipoamide acetyltransferase, putative                  | 1,295 | 1,774E-30  |
| TcCLB.511181.150 | hypothetical protein, conserved                               | 1,295 | 1,01E-25   |
| TcCLB.506005.10  | dispersed gene family protein 1 (DGF-1, pseudogene), putative | 1,295 | 1,416E-19  |
| TcCLB.509449.5   | receptor-type adenylate cyclase, putative (fragment)          | 1,295 | 0,003889   |
| TcCLB.406999.10  | dispersed gene family protein 1 (DGF-1), putative (fragment)  | 1,295 | 0,0234     |
| TcCLB.511825.40  | centrin-4, putative (Centrin4)                                | 1,294 | 8,865E-42  |
| TcCLB.507383.10  | hypothetical protein, conserved                               | 1,294 | 0,0000806  |
| TcCLB.509601.100 | hypothetical protein, conserved                               | 1,293 | 6,082E-43  |
| TcCLB.510329.10  | hypothetical protein, conserved                               | 1,293 | 2,65E-41   |
| TcCLB.510323.40  | heat shock protein 20, putative                               | 1,293 | 3,141E-33  |

|                  |                                                               |       |           |
|------------------|---------------------------------------------------------------|-------|-----------|
| TcCLB.508001.10  | dispersed gene family protein 1 (DGF-1), putative             | 1,293 | 3,55E-09  |
| TcCLB.510101.170 | 40S ribosomal protein S5, putative                            | 1,292 | 2,519E-47 |
| TcCLB.506735.10  | mitochondrial processing peptidase alpha subunit, putative    | 1,292 | 1,644E-46 |
| TcCLB.508637.90  | phosphoglucomutase                                            | 1,292 | 1,581E-30 |
| TcCLB.506605.150 | 60S ribosomal protein, putative                               | 1,292 | 1,017E-21 |
| TcCLB.505201.20  | dispersed gene family protein 1 (DGF-1, pseudogene), putative | 1,292 | 2,354E-15 |
| TcCLB.510629.200 | retrotransposon hot spot protein (RHS, pseudogene), putative  | 1,292 | 6,239E-07 |
| TcCLB.510577.30  | hypothetical protein                                          | 1,291 | 1,132E-30 |
| TcCLB.511469.100 | 2-oxoisovalerate dehydrogenase beta subunit, mitochondrial    | 1,291 | 1,174E-24 |
| TcCLB.503929.79  | serine-palmitoyl-CoA transferase, putative                    | 1,291 | 1,471E-19 |
| TcCLB.506925.530 | glycosomal transporter (GAT3), putative                       | 1,29  | 2,374E-63 |
| TcCLB.511283.290 | hypothetical protein, conserved                               | 1,29  | 1,826E-51 |
| TcCLB.511733.80  | hypothetical protein                                          | 1,29  | 2,741E-32 |
| TcCLB.503891.80  | hypothetical protein, conserved                               | 1,29  | 2,53E-27  |
| TcCLB.507587.24  | dispersed gene family protein 1 (DGF-1), putative (fragment)  | 1,29  | 5,919E-15 |
| TcCLB.507259.10  | trypanothione peroxidase, putative                            | 1,289 | 3,001E-49 |
| TcCLB.509153.100 | arginine N-methyltransferase, type III, putative (PRMT7)      | 1,289 | 3,479E-48 |
| TcCLB.508153.760 | hypothetical protein, conserved                               | 1,289 | 6,231E-36 |
| TcCLB.510847.40  | retrotransposon hot spot protein (RHS, pseudogene), putative  | 1,289 | 1,78E-26  |
| TcCLB.508799.280 | protein associated with differentiation 4, putative           | 1,288 | 1,29E-37  |
| TcCLB.511819.30  | hypothetical protein, conserved                               | 1,288 | 5,56E-25  |
| TcCLB.509687.19  | dispersed gene family protein 1 (DGF-1), putative (fragment)  | 1,288 | 2,391E-07 |
| TcCLB.508461.30  | 3-demethylubiquinone-9 3-methyltransferase, putative          | 1,287 | 2,377E-29 |
| TcCLB.505171.60  | hypothetical protein, conserved                               | 1,286 | 1,454E-38 |
| TcCLB.509295.110 | dispersed gene family protein 1 (DGF-1, pseudogene), putative | 1,285 | 0,0004958 |
| TcCLB.510529.30  | hypothetical protein, conserved                               | 1,283 | 1,455E-44 |
| TcCLB.509825.14  | 40S ribosomal protein SA, putative                            | 1,283 | 8,505E-18 |
| TcCLB.504639.19  | dispersed gene family protein 1 (DGF-1), putative (fragment)  | 1,283 | 1,28E-09  |
| TcCLB.510643.190 | retrotransposon hot spot (RHS) protein, putative              | 1,281 | 1,061E-33 |
| TcCLB.510397.39  | dispersed gene family protein 1 (DGF-1), putative             | 1,281 | 6,783E-07 |
| TcCLB.507159.30  | hypothetical protein, conserved                               | 1,28  | 1,198E-40 |
| TcCLB.508961.10  | hypothetical protein, conserved                               | 1,28  | 1,334E-32 |
| TcCLB.511209.69  | membrane-bound acid phosphatase, putative (fragment)          | 1,28  | 2,377E-21 |
| TcCLB.511575.20  | hypothetical protein, conserved                               | 1,28  | 4,117E-18 |
| TcCLB.506401.170 | plasma membrane Ca <sup>2+</sup> ATPase                       | 1,279 | 1,797E-66 |
| TcCLB.506301.11  | heat shock protein, putative (fragment)                       | 1,279 | 5,926E-43 |
| TcCLB.507673.70  | hypothetical protein, conserved                               | 1,279 | 5,342E-31 |
| TcCLB.511217.10  | hypothetical protein                                          | 1,279 | 2,78E-21  |
| TcCLB.508193.60  | UDP-Gal or UDP-GlcNAc-dependent glycosyltransferase, putative | 1,279 | 2,834E-21 |
| TcCLB.506755.260 | mitochondrial RNA-binding protein 2, putative                 | 1,278 | 3,116E-32 |
| TcCLB.511285.100 | hypothetical protein                                          | 1,278 | 2,068E-30 |
| TcCLB.510089.100 | hypothetical protein                                          | 1,278 | 2,169E-25 |
| TcCLB.510357.70  | ubiquinone biosynthesis protein-like protein, putative        | 1,278 | 7,349E-22 |
| TcCLB.511469.110 | dispersed gene family protein 1 (DGF-1), putative             | 1,278 | 1,795E-08 |
| TcCLB.506773.160 | hypothetical protein, conserved                               | 1,277 | 3,224E-34 |

|                  |                                                               |       |            |
|------------------|---------------------------------------------------------------|-------|------------|
| TcCLB.506931.20  | hypothetical protein, conserved                               | 1,277 | 2,034E-29  |
| TcCLB.507781.10  | hypothetical protein, conserved (pseudogene)                  | 1,277 | 1,483E-13  |
| TcCLB.511817.280 | hypothetical protein, conserved                               | 1,276 | 2,733E-51  |
| TcCLB.506369.20  | transporter, putative                                         | 1,276 | 4,393E-13  |
| TcCLB.505533.10  | dispersed gene family protein 1 (DGF-1, pseudogene), putative | 1,276 | 0,00004343 |
| TcCLB.506649.20  | P-type H -ATPase, putative                                    | 1,275 | 4,2E-35    |
| TcCLB.511529.210 | hypothetical protein, conserved                               | 1,275 | 4,22E-20   |
| TcCLB.510089.210 | hypothetical protein, conserved                               | 1,275 | 9,405E-20  |
| TcCLB.424937.10  | glucose transporter, putative                                 | 1,275 | 8,027E-14  |
| TcCLB.511803.40  | Present in the outer mitochondrial membrane proteome          | 1,274 | 2,994E-69  |
| TcCLB.503955.20  | mitochondrial DNA polymerase beta, putative                   | 1,274 | 1,152E-53  |
| TcCLB.506241.160 | hypothetical protein, conserved                               | 1,274 | 2,278E-45  |
| TcCLB.510329.150 | hypothetical protein, conserved                               | 1,274 | 3,436E-41  |
| TcCLB.506407.100 | hypothetical protein, conserved                               | 1,273 | 2,971E-45  |
| TcCLB.506829.80  | nicotinamidase, putative (PNC1)                               | 1,272 | 2,072E-26  |
| TcCLB.507653.40  | dispersed gene family protein 1 (DGF-1), putative             | 1,272 | 6,268E-11  |
| TcCLB.510879.60  | hypothetical protein, conserved                               | 1,271 | 3,409E-19  |
| TcCLB.508395.9   | dispersed gene family protein 1 (DGF-1), putative (fragment)  | 1,271 | 0,000455   |
| TcCLB.509023.10  | calcium binding protein EF hand, putative                     | 1,27  | 2,068E-39  |
| TcCLB.505807.60  | hypothetical protein, conserved                               | 1,27  | 1,478E-35  |
| TcCLB.511301.90  | protein kinase, putative                                      | 1,27  | 2,432E-30  |
| TcCLB.511257.10  | DNAK protein, putative                                        | 1,269 | 5,061E-43  |
| TcCLB.511511.40  | hypothetical protein, conserved                               | 1,269 | 2,288E-35  |
| TcCLB.510661.174 | riboflavin kinase, putative                                   | 1,269 | 4,636E-14  |
| TcCLB.511167.80  | PIF1 helicase-like protein, putative                          | 1,268 | 1,367E-38  |
| TcCLB.506337.160 | NADH-ubiquinone oxidoreductase complex I subunit, putative    | 1,267 | 5,236E-31  |
| TcCLB.507543.30  | retrotransposon hot spot protein (RHS, pseudogene), putative  | 1,265 | 9,919E-49  |
| TcCLB.511729.60  | MORN repeat-containing protein 1 (MORN1)                      | 1,264 | 1,011E-39  |
| TcCLB.506053.5   | amino acid transporter, putative (fragment)                   | 1,264 | 2,089E-35  |
| TcCLB.510755.89  | kinetoplastid membrane protein KMP-11, putative               | 1,264 | 2,421E-31  |
| TcCLB.509725.30  | hypothetical protein, conserved (pseudogene)                  | 1,263 | 7,466E-15  |
| TcCLB.506829.110 | fatty acyl CoA synthetase 2, putative                         | 1,262 | 3,786E-37  |
| TcCLB.509331.40  | hypothetical protein, conserved                               | 1,262 | 3,629E-17  |
| TcCLB.506559.110 | hypothetical protein                                          | 1,261 | 2,926E-30  |
| TcCLB.506825.140 | hypothetical protein, conserved                               | 1,261 | 4,197E-23  |
| TcCLB.511355.24  | hypothetical protein, conserved                               | 1,261 | 3,653E-15  |
| TcCLB.507919.10  | surface protease GP63, putative                               | 1,26  | 2,245E-26  |
| TcCLB.511277.70  | Elongation factor Tu, mitochondrial, putative (EF-Tu)         | 1,259 | 1,47E-48   |
| TcCLB.503603.10  | mitochondrial RNA binding complex 1 subunit, putative         | 1,259 | 4,03E-24   |
| TcCLB.504153.30  | hypothetical protein, conserved                               | 1,258 | 2,158E-33  |
| TcCLB.506823.100 | dispersed gene family protein 1 (DGF-1), putative             | 1,258 | 0,00000708 |
| TcCLB.510357.10  | DnaJ chaperone protein, putative                              | 1,257 | 4,559E-44  |
| TcCLB.509459.60  | Na/H antiporter-like protein, putative                        | 1,257 | 1,676E-39  |
| TcCLB.509937.210 | hypothetical protein, conserved                               | 1,257 | 4,843E-31  |
| TcCLB.511655.40  | hypothetical protein, conserved                               | 1,257 | 1,336E-27  |

|                  |                                                           |       |           |
|------------------|-----------------------------------------------------------|-------|-----------|
| TcCLB.503521.30  | Dynein light chain roadblock-type protein, putative       | 1,257 | 1,734E-25 |
| TcCLB.508831.80  | hypothetical protein, conserved                           | 1,257 | 6,417E-13 |
| TcCLB.506153.20  | amino acid transporter, putative                          | 1,256 | 6,913E-47 |
| TcCLB.511391.10  | retrotransposon hot spot protein (RHS, pseudogene), puta  | 1,256 | 4,765E-37 |
| TcCLB.506475.105 | hypothetical protein, conserved                           | 1,256 | 5,442E-19 |
| TcCLB.509509.20  | C-1-tetrahydrofolate synthase, cytoplasmic, putative      | 1,256 | 1,516E-17 |
| TcCLB.506625.80  | cAMP-specific phosphodiesterase, putative                 | 1,255 | 8,605E-53 |
| TcCLB.509317.20  | esterase, putative                                        | 1,255 | 5,383E-20 |
| TcCLB.506925.319 | isocitrate dehydrogenase, putative                        | 1,255 | 2,312E-14 |
| TcCLB.506529.420 | alanine aminotransferase, putative                        | 1,254 | 4,303E-42 |
| TcCLB.510861.110 | hypothetical protein                                      | 1,254 | 2,785E-37 |
| TcCLB.506843.20  | retrotransposon hot spot protein (RHS, pseudogene), puta  | 1,254 | 3,415E-20 |
| TcCLB.509775.34  | hypothetical protein, conserved                           | 1,254 | 2,586E-17 |
| TcCLB.508323.70  | centrin-4, putative (Centrin4)                            | 1,254 | 1,596E-09 |
| TcCLB.506593.30  | ribosomal protein S7, putative                            | 1,253 | 2,972E-67 |
| TcCLB.508153.605 | hypothetical protein, conserved                           | 1,253 | 1,244E-25 |
| TcCLB.504427.150 | oxidoreductase-like protein, putative                     | 1,253 | 5,386E-19 |
| TcCLB.511621.60  | Asparagine-linked glycosylation protein 12 (ALG12)        | 1,253 | 1,213E-07 |
| TcCLB.509233.50  | hypothetical protein, conserved                           | 1,252 | 5,05E-48  |
| TcCLB.509233.180 | ATP synthase F1, beta subunit, putative (ATPB)            | 1,252 | 1,443E-47 |
| TcCLB.507869.10  | NADH-ubiquinone oxidoreductase, mitochondrial, putative   | 1,251 | 1,316E-39 |
| TcCLB.507993.40  | hypothetical protein, conserved                           | 1,251 | 9,737E-31 |
| TcCLB.504137.80  | adenylyl cyclase-associated protein, putative             | 1,25  | 4,771E-30 |
| TcCLB.506529.550 | cysteine peptidase, putative                              | 1,249 | 1,565E-39 |
| TcCLB.507427.20  | dispersed gene family protein 1 (DGF-1, pseudogene), put  | 1,249 | 7,487E-10 |
| TcCLB.507943.40  | histone H4, putative                                      | 1,248 | 7,025E-50 |
| TcCLB.510877.190 | hypothetical protein, conserved                           | 1,248 | 4,669E-08 |
| TcCLB.510421.220 | hypothetical protein, conserved                           | 1,247 | 6,031E-33 |
| TcCLB.503401.40  | glycosyl transferase, putative                            | 1,246 | 6,061E-51 |
| TcCLB.510479.30  | hypothetical protein                                      | 1,246 | 7,038E-08 |
| TcCLB.504153.310 | heat shock protein, putative                              | 1,245 | 5,937E-78 |
| TcCLB.506417.60  | terbinafine resistance locus protein (yip1), putative     | 1,245 | 4,512E-31 |
| TcCLB.507717.20  | hypothetical protein                                      | 1,244 | 4,985E-36 |
| TcCLB.510667.90  | hypothetical protein, conserved                           | 1,243 | 1,776E-24 |
| TcCLB.510827.40  | hypothetical protein                                      | 1,243 | 8,845E-11 |
| TcCLB.503617.31  | nuclear receptor binding factor, putative                 | 1,241 | 9,083E-36 |
| TcCLB.506435.410 | uracil phosphoribosyltransferase, putative                | 1,241 | 5,732E-29 |
| TcCLB.509611.20  | peptidyl-prolyl cis-trans isomerase (PIN1)                | 1,241 | 6,849E-14 |
| TcCLB.510839.11  | hypothetical protein                                      | 1,241 | 7,695E-13 |
| TcCLB.424795.10  | hypothetical protein, conserved                           | 1,24  | 2,345E-22 |
| TcCLB.510343.15  | protein kinase, putative                                  | 1,24  | 8,951E-09 |
| TcCLB.503715.20  | hypothetical protein                                      | 1,238 | 2,87E-21  |
| TcCLB.509013.10  | calpain-like cysteine peptidase, putative                 | 1,238 | 2,854E-16 |
| TcCLB.510925.9   | dispersed gene family protein 1 (DGF-1), putative (fragme | 1,238 | 0,001382  |
| TcCLB.445553.10  | hypothetical protein, conserved                           | 1,237 | 5,898E-23 |

|                  |                                                              |       |           |
|------------------|--------------------------------------------------------------|-------|-----------|
| TcCLB.508349.30  | hypothetical protein, conserved                              | 1,236 | 6,442E-54 |
| TcCLB.507539.40  | cell cycle sequence binding phosphoprotein (RBP33), puta     | 1,236 | 1,284E-40 |
| TcCLB.511517.60  | C-1-tetrahydrofolate synthase, cytoplasmic, putative         | 1,236 | 9,223E-25 |
| TcCLB.508507.59  | NADH dehydrogenase [ubiquinone] iron-sulfur protein 7, r     | 1,235 | 1,346E-27 |
| TcCLB.509535.9   | electron transport protein SCO1/SCO2, putative               | 1,235 | 1,264E-17 |
| TcCLB.508419.20  | dispersed gene family protein 1 (DGF-1, pseudogene), put     | 1,235 | 6,278E-14 |
| TcCLB.508119.144 | ribosomal protein L38, putative                              | 1,234 | 4,985E-34 |
| TcCLB.504839.44  | tryparedoxin peroxidase                                      | 1,233 | 1,834E-54 |
| TcCLB.508741.340 | hypothetical protein, conserved                              | 1,233 | 1,266E-21 |
| TcCLB.508221.840 | hypothetical protein                                         | 1,233 | 0,004223  |
| TcCLB.510575.5   | proton motive ATPase, putative                               | 1,232 | 4,444E-26 |
| TcCLB.507817.50  | hypothetical protein, conserved                              | 1,232 | 1,921E-19 |
| TcCLB.507221.50  | hypothetical protein, conserved                              | 1,232 | 6,179E-18 |
| TcCLB.505071.50  | hypothetical protein, conserved                              | 1,232 | 1,921E-14 |
| TcCLB.507907.55  | ATP-dependent DEAD/H RNA helicase (pseudogene), puta         | 1,232 | 2,899E-11 |
| TcCLB.509151.130 | deoxyuridine triphosphatase, putative                        | 1,231 | 2,241E-45 |
| TcCLB.508567.100 | hypothetical protein, conserved                              | 1,231 | 7,524E-41 |
| TcCLB.511261.160 | pyruvate dehydrogenase E1 component alpha subunit, put       | 1,231 | 4,055E-28 |
| TcCLB.447255.4   | ubiquitin, putative                                          | 1,231 | 2,257E-17 |
| TcCLB.510511.9   | Na/H antiporter-like protein, putative                       | 1,231 | 2,608E-16 |
| TcCLB.510041.20  | zinc carboxypeptidase, putative                              | 1,23  | 1,129E-09 |
| TcCLB.510431.274 | 60S ribosomal protein L37, putative                          | 1,229 | 1,189E-57 |
| TcCLB.506295.70  | hypothetical protein, conserved                              | 1,229 | 2,402E-39 |
| TcCLB.510339.50  | spermidine synthase, putative                                | 1,229 | 4,511E-26 |
| TcCLB.503531.40  | hypothetical protein, conserved                              | 1,229 | 4,107E-12 |
| TcCLB.504907.9   | dispersed gene family protein 1 (DGF-1), putative (fragm     | 1,229 | 8,791E-12 |
| TcCLB.506685.40  | hypothetical protein, conserved                              | 1,228 | 1,611E-31 |
| TcCLB.509963.30  | tryptophanyl-tRNA synthetase (pseudogene), putative          | 1,228 | 0,002128  |
| TcCLB.504149.160 | phosphoinositide-specific phospholipase C, putative          | 1,227 | 4,604E-41 |
| TcCLB.507473.20  | hypothetical protein                                         | 1,227 | 3,566E-20 |
| TcCLB.511293.69  | glycosomal malate dehydrogenase, putative                    | 1,226 | 1,513E-75 |
| TcCLB.503483.9   | retrotransposon hot spot (RHS) protein, putative             | 1,226 | 1,398E-70 |
| TcCLB.509875.240 | hypothetical protein, conserved                              | 1,226 | 7,057E-41 |
| TcCLB.509213.160 | protein kinase, putative                                     | 1,226 | 4,202E-37 |
| TcCLB.511759.30  | hypothetical protein, conserved                              | 1,226 | 1,071E-31 |
| TcCLB.510095.70  | retrotransposon hot spot protein (RHS, pseudogene), puta     | 1,226 | 2,204E-23 |
| TcCLB.447255.10  | hypothetical protein, conserved                              | 1,226 | 2,326E-22 |
| TcCLB.506743.110 | protein tyrosine phosphatase, putative                       | 1,226 | 3,122E-17 |
| TcCLB.509039.4   | aspartyl-tRNA synthetase, putative                           | 1,225 | 4,9E-16   |
| TcCLB.510309.40  | 60S acidic ribosomal protein P2, putative                    | 1,225 | 1,424E-14 |
| TcCLB.507603.250 | hypothetical protein, conserved                              | 1,224 | 5,226E-36 |
| TcCLB.463451.10  | hypothetical protein, conserved                              | 1,223 | 6,301E-33 |
| TcCLB.506999.90  | rieske iron-sulfur protein, mitochondrial precursor, putativ | 1,222 | 1,661E-48 |
| TcCLB.504149.175 | hypothetical protein, conserved                              | 1,222 | 1,158E-39 |
| TcCLB.504041.20  | hypothetical protein, conserved                              | 1,222 | 6,72E-21  |

|                  |                                                              |       |           |
|------------------|--------------------------------------------------------------|-------|-----------|
| TcCLB.510385.10  | dispersed gene family protein 1 (DGF-1), putative            | 1,222 | 2,264E-06 |
| TcCLB.509373.10  | trans-sialidase (pseudogene), putative                       | 1,221 | 1,411E-07 |
| TcCLB.509761.10  | hypothetical protein, conserved                              | 1,22  | 2,042E-59 |
| TcCLB.509945.30  | hypothetical protein                                         | 1,22  | 2,427E-48 |
| TcCLB.507667.20  | hypothetical protein, conserved                              | 1,22  | 2,175E-46 |
| TcCLB.508799.80  | mRNA cap guanine-N7 methyltransferase, putative              | 1,22  | 5,483E-25 |
| TcCLB.458759.10  | profilin, putative                                           | 1,22  | 1,176E-16 |
| TcCLB.506053.10  | amino acid transporter, putative                             | 1,218 | 4,559E-68 |
| TcCLB.511825.100 | hypothetical protein, conserved                              | 1,218 | 1,746E-25 |
| TcCLB.509237.70  | UDP-Gal or UDP-GlcNAc-dependent glycosyltransferase, $\beta$ | 1,217 | 3,193E-11 |
| TcCLB.507445.50  | myosin heavy chain, putative                                 | 1,216 | 1,165E-42 |
| TcCLB.511621.90  | esterase, putative                                           | 1,215 | 1,028E-17 |
| TcCLB.506487.24  | dispersed gene family protein 1 (DGF-1), putative            | 1,215 | 1,068E-10 |
| TcCLB.508837.120 | prohibitin, putative                                         | 1,214 | 3,451E-45 |
| TcCLB.509033.80  | hypothetical protein, conserved                              | 1,214 | 4,312E-33 |
| TcCLB.507603.270 | cruzipain precursor, putative                                | 1,214 | 1,974E-28 |
| TcCLB.507769.30  | hypothetical protein, conserved                              | 1,213 | 1,033E-41 |
| TcCLB.509237.100 | hypothetical protein, conserved                              | 1,213 | 2,298E-19 |
| TcCLB.508069.10  | retrotransposon hot spot protein (RHS, pseudogene), puta     | 1,213 | 1,842E-14 |
| TcCLB.503617.40  | ATP synthase F1, alpha subunit, putative (fragment) (ATP)    | 1,212 | 9,683E-46 |
| TcCLB.506941.180 | hypothetical protein, conserved                              | 1,212 | 3,708E-28 |
| TcCLB.510305.70  | hypothetical protein, conserved                              | 1,212 | 4,607E-23 |
| TcCLB.511069.4   | transketolase, putative                                      | 1,212 | 1,135E-14 |
| TcCLB.507501.30  | hypothetical protein, conserved                              | 1,212 | 2,888E-06 |
| TcCLB.506925.550 | calpain-like cysteine peptidase (pseudogene), putative       | 1,211 | 4,842E-11 |
| TcCLB.507943.20  | histone H4, putative                                         | 1,21  | 5,878E-40 |
| TcCLB.511647.60  | hypothetical protein, conserved                              | 1,21  | 3,11E-32  |
| TcCLB.508265.44  | mitochondrial pyruvate carrier protein 2, putative           | 1,21  | 8,215E-23 |
| TcCLB.509583.4   | 60S ribosomal protein L44, putative                          | 1,209 | 9,41E-50  |
| TcCLB.506775.170 | NADH-cytochrome b5 reductase, putative                       | 1,209 | 9,35E-31  |
| TcCLB.504427.240 | metallo-beta-lactamase-like protein, putative                | 1,209 | 1,555E-18 |
| TcCLB.503527.40  | GPI alpha-mannosyltransferase III (GPI10)                    | 1,209 | 5,351E-16 |
| TcCLB.511353.34  | hypothetical protein, conserved                              | 1,208 | 1,918E-25 |
| TcCLB.510359.260 | mitochondrial import inner membrane translocase subuni       | 1,208 | 2,263E-24 |
| TcCLB.504795.9   | dispersed gene family protein 1 (DGF-1), putative            | 1,208 | 3,984E-10 |
| TcCLB.506219.10  | hypothetical protein, conserved                              | 1,207 | 3,875E-32 |
| TcCLB.510139.50  | retrotransposon hot spot protein (RHS, pseudogene), puta     | 1,207 | 6,037E-16 |
| TcCLB.511001.240 | proteasome activator protein pa26, putative                  | 1,207 | 4,841E-12 |
| TcCLB.504717.10  | divalent cation tolerance protein, putative                  | 1,207 | 0,005899  |
| TcCLB.510627.179 | syntaxin binding protein 1 (pseudogene), putative            | 1,207 | 0,006425  |
| TcCLB.506321.280 | hypothetical protein, conserved                              | 1,206 | 4,431E-63 |
| TcCLB.511581.10  | fatty acyl CoA synthetase 2, putative                        | 1,206 | 5,885E-20 |
| TcCLB.510877.160 | hypothetical protein, conserved                              | 1,204 | 2,556E-28 |
| TcCLB.508169.69  | peptidyl-prolyl cis-trans isomerase, putative                | 1,204 | 3,459E-27 |
| TcCLB.505115.20  | hypothetical protein                                         | 1,204 | 0,0001661 |

|                  |                                                           |       |            |
|------------------|-----------------------------------------------------------|-------|------------|
| TcCLB.508175.360 | cystathionine beta-synthase (CBS)                         | 1,204 | 0,001557   |
| TcCLB.509669.160 | hypothetical protein, conserved                           | 1,203 | 2,749E-34  |
| TcCLB.509179.150 | otubain cysteine peptidase, Clan CA, family C65, putative | 1,203 | 2,882E-31  |
| TcCLB.511817.80  | protein kinase, putative                                  | 1,203 | 1,673E-25  |
| TcCLB.507167.150 | retrotransposon hot spot protein (RHS, pseudogene), puta  | 1,203 | 2,158E-18  |
| TcCLB.505983.9   | tryparedoxin peroxidase, putative                         | 1,202 | 3,746E-27  |
| TcCLB.509141.30  | hypothetical protein                                      | 1,202 | 4,203E-19  |
| TcCLB.508283.69  | dispersed gene family protein 1 (DGF-1), putative (fragme | 1,202 | 1,162E-09  |
| TcCLB.511571.20  | hypothetical protein, conserved                           | 1,201 | 2,745E-35  |
| TcCLB.511925.20  | hypothetical protein, conserved                           | 1,201 | 8,404E-26  |
| TcCLB.509961.70  | dispersed gene family protein 1 (DGF-1, pseudogene), put  | 1,201 | 9,971E-17  |
| TcCLB.507089.270 | dihydrolipoyl dehydrogenase, putative (GCVL-2)            | 1,2   | 2,375E-48  |
| TcCLB.509767.70  | V-type proton ATPase subunit a, putative (VAa)            | 1,2   | 7,175E-35  |
| TcCLB.511127.80  | hypothetical protein, conserved                           | 1,2   | 1,262E-31  |
| TcCLB.508647.174 | hypothetical protein, conserved                           | 1,2   | 5,3E-15    |
| TcCLB.509543.50  | DNAK protein, putative                                    | 1,199 | 1,341E-42  |
| TcCLB.508785.10  | Present in the outer mitochondrial membrane proteome 1    | 1,199 | 3,388E-23  |
| TcCLB.506025.50  | Vacuolar proton pump subunit B, putative                  | 1,198 | 1,547E-44  |
| TcCLB.508839.50  | hypothetical protein, conserved                           | 1,197 | 7,216E-38  |
| TcCLB.509549.120 | endosomal integral membrane protein (pseudogene), put     | 1,197 | 2,675E-27  |
| TcCLB.511277.160 | 60S ribosomal protein L10a, putative                      | 1,196 | 3,131E-101 |
| TcCLB.509099.50  | trypanothione synthetase (TRYS)                           | 1,196 | 6,735E-50  |
| TcCLB.505163.20  | hypothetical protein, conserved                           | 1,196 | 1,369E-17  |
| TcCLB.506247.340 | hypothetical protein, conserved                           | 1,195 | 4,407E-39  |
| TcCLB.506355.140 | hypothetical protein, conserved                           | 1,195 | 1,799E-35  |
| TcCLB.510659.20  | hypothetical protein, conserved                           | 1,195 | 9,747E-19  |
| TcCLB.510101.470 | PUF nine target 1                                         | 1,194 | 1,093E-46  |
| TcCLB.509965.290 | p22 protein precursor, putative                           | 1,194 | 8,722E-33  |
| TcCLB.511277.486 | hypothetical protein, conserved                           | 1,194 | 1,219E-16  |
| TcCLB.506845.40  | hypothetical protein, conserved (pseudogene)              | 1,194 | 3,129E-11  |
| TcCLB.508023.50  | hypothetical protein                                      | 1,194 | 6,91E-10   |
| TcCLB.508465.90  | galactokinase, putative                                   | 1,193 | 2,287E-27  |
| TcCLB.504579.10  | retrotransposon hot spot protein (RHS, pseudogene), puta  | 1,193 | 9,276E-16  |
| TcCLB.507873.50  | hypothetical protein, conserved                           | 1,193 | 1,484E-12  |
| TcCLB.507401.9   | dispersed gene family protein 1 (DGF-1), putative (fragme | 1,193 | 8,371E-09  |
| TcCLB.506595.90  | damage-specific DNA binding protein (pseudogene), putat   | 1,192 | 7,781E-26  |
| TcCLB.509331.50  | ribosomal RNA methyltransferase, putative                 | 1,191 | 7,458E-21  |
| TcCLB.506593.19  | ribosomal protein S7, putative                            | 1,19  | 8,479E-58  |
| TcCLB.510769.60  | hypothetical protein, conserved (pseudogene)              | 1,19  | 4,558E-32  |
| TcCLB.505985.9   | calpain cysteine peptidase, putative (fragment)           | 1,189 | 1,411E-16  |
| TcCLB.506129.10  | dispersed gene family protein 1 (DGF-1, pseudogene), put  | 1,189 | 2,365E-09  |
| TcCLB.510079.40  | dispersed gene family protein 1 (DGF-1, pseudogene), put  | 1,189 | 0,0007892  |
| TcCLB.511233.7   | 60S ribosomal protein L10a, putative                      | 1,188 | 6,012E-37  |
| TcCLB.506351.70  | hypothetical protein, conserved                           | 1,188 | 3,117E-27  |
| TcCLB.507195.40  | trans-sialidase (pseudogene), putative                    | 1,188 | 0,003076   |

|                  |                                                                |       |            |
|------------------|----------------------------------------------------------------|-------|------------|
| TcCLB.511295.60  | hypothetical protein, conserved (pseudogene)                   | 1,187 | 5,032E-34  |
| TcCLB.503505.10  | 60S acidic ribosomal protein P2, putative                      | 1,187 | 1,666E-26  |
| TcCLB.508973.69  | hypothetical protein, conserved                                | 1,187 | 5,042E-20  |
| TcCLB.503751.20  | hypothetical protein                                           | 1,187 | 4,863E-06  |
| TcCLB.510293.30  | Eukaryotic translation initiation factor 4E type 5, putative   | 1,186 | 1,747E-32  |
| TcCLB.506721.30  | calpain-like cysteine peptidase, putative                      | 1,186 | 9,427E-27  |
| TcCLB.508815.150 | hypothetical protein, conserved                                | 1,186 | 9,106E-14  |
| TcCLB.507047.180 | hypothetical protein, conserved                                | 1,186 | 4,106E-12  |
| TcCLB.510325.20  | hypothetical protein                                           | 1,186 | 1,112E-06  |
| TcCLB.506207.50  | translationally controlled tumor protein (TCTP), putative      | 1,184 | 3,313E-66  |
| TcCLB.509151.140 | 60S ribosomal protein L23a, putative                           | 1,183 | 6,926E-44  |
| TcCLB.503801.30  | DNA repair protein RAD51, putative (RAD51)                     | 1,183 | 1,221E-42  |
| TcCLB.509967.20  | mismatch repair protein MSH4, putative                         | 1,183 | 1,536E-22  |
| TcCLB.506641.9   | dispersed gene family protein 1 (DGF-1), putative              | 1,183 | 0,00002928 |
| TcCLB.507537.20  | cysteine peptidase, putative                                   | 1,182 | 6,702E-38  |
| TcCLB.511461.40  | hypothetical protein, conserved                                | 1,182 | 1,303E-24  |
| TcCLB.503839.39  | hypothetical protein, conserved                                | 1,182 | 1,655E-12  |
| TcCLB.510397.5   | GTP-binding protein, putative (fragment)                       | 1,181 | 5,822E-20  |
| TcCLB.508859.74  | SNF2 DNA repair protein, putative                              | 1,18  | 6,623E-48  |
| TcCLB.503521.50  | UTP-glucose-1-phosphate uridylyltransferase 2, putative        | 1,18  | 6,553E-18  |
| TcCLB.511751.205 | hypothetical protein                                           | 1,179 | 7,086E-32  |
| TcCLB.507537.10  | cruzipain precursor (pseudogene), putative                     | 1,178 | 1,85E-42   |
| TcCLB.510325.40  | acyltransferase, putative                                      | 1,178 | 2,408E-25  |
| TcCLB.430895.16  | hypothetical protein, conserved (fragment)                     | 1,178 | 3,139E-10  |
| TcCLB.504001.10  | hypothetical protein, conserved                                | 1,176 | 2,337E-44  |
| TcCLB.508479.370 | hypothetical protein, conserved                                | 1,176 | 2,857E-21  |
| TcCLB.510755.65  | hypothetical protein                                           | 1,176 | 3,11E-12   |
| TcCLB.510847.70  | dispersed gene family protein 1 (DGF-1), putative              | 1,176 | 8,327E-08  |
| TcCLB.505943.110 | retrotransposon hot spot protein (RHS, pseudogene), puta       | 1,175 | 2,881E-18  |
| TcCLB.506777.20  | cytoplasmic translation machinery associated protein, putative | 1,174 | 5,572E-25  |
| TcCLB.510079.10  | retrotransposon hot spot protein (RHS, pseudogene), puta       | 1,174 | 8,779E-23  |
| TcCLB.508387.60  | hypothetical protein, conserved                                | 1,174 | 5,874E-16  |
| TcCLB.504099.10  | retrotransposon hot spot (RHS) protein, putative               | 1,174 | 1,4E-14    |
| TcCLB.505995.10  | dispersed gene family protein 1 (DGF-1), putative              | 1,174 | 0,00007033 |
| TcCLB.508779.90  | structural maintenance of chromosome protein 4, putative       | 1,173 | 2,494E-35  |
| TcCLB.511261.30  | NADH-ubiquinone oxidoreductase complex I subunit, putative     | 1,173 | 6,367E-30  |
| TcCLB.508523.40  | dispersed gene family protein 1 (DGF-1), putative              | 1,173 | 2,103E-21  |
| TcCLB.510135.10  | retrotransposon hot spot protein (RHS, pseudogene), puta       | 1,173 | 1,542E-14  |
| TcCLB.506997.9   | dispersed gene family protein 1 (DGF-1), putative              | 1,173 | 0,0001527  |
| TcCLB.507015.10  | retrotransposon hot spot (RHS) protein, putative               | 1,172 | 1,945E-46  |
| TcCLB.511393.70  | hypothetical protein, conserved                                | 1,172 | 2,624E-33  |
| TcCLB.510643.10  | dispersed gene family protein 1 (DGF-1), putative              | 1,172 | 1,277E-10  |
| TcCLB.509029.60  | hypothetical protein, conserved                                | 1,171 | 1,345E-46  |
| TcCLB.511289.90  | hypothetical protein, conserved                                | 1,171 | 9,047E-32  |
| TcCLB.506591.30  | hypothetical protein, conserved                                | 1,17  | 1,374E-31  |



|                  |                                                               |       |            |
|------------------|---------------------------------------------------------------|-------|------------|
| TcCLB.503893.130 | hypothetical protein, conserved                               | 1,17  | 1,647E-15  |
| TcCLB.504199.10  | hypothetical protein, conserved                               | 1,169 | 1,01E-42   |
| TcCLB.505939.30  | hypothetical protein, conserved                               | 1,169 | 4,587E-37  |
| TcCLB.510609.40  | ATP synthase F1, alpha subunit, putative (pseudogene)         | 1,167 | 1,99E-52   |
| TcCLB.511865.60  | hypothetical protein, conserved                               | 1,167 | 3,242E-33  |
| TcCLB.508017.10  | hypothetical protein, conserved                               | 1,167 | 0,00006874 |
| TcCLB.506945.230 | 40S ribosomal protein S14, putative                           | 1,166 | 1,051E-39  |
| TcCLB.510777.20  | aspartyl-tRNA synthetase, putative                            | 1,166 | 5,94E-39   |
| TcCLB.511527.70  | Unconventional myosin                                         | 1,166 | 7,901E-26  |
| TcCLB.506941.280 | heat shock 70 kDa protein, mitochondrial precursor, putative  | 1,166 | 1,637E-10  |
| TcCLB.509857.60  | hypothetical protein, conserved                               | 1,165 | 4,558E-43  |
| TcCLB.509749.10  | Biotin--acetyl-CoA-carboxylase ligase, putative               | 1,165 | 1,276E-24  |
| TcCLB.510395.20  | hypothetical protein, conserved                               | 1,165 | 9,527E-15  |
| TcCLB.509437.103 | dispersed gene family protein 1 (DGF-1, pseudogene), putative | 1,165 | 0,0004461  |
| TcCLB.507711.190 | hypothetical protein, conserved                               | 1,164 | 1,591E-52  |
| TcCLB.506403.9   | hypothetical protein, conserved (fragment)                    | 1,164 | 1,839E-33  |
| TcCLB.507061.34  | hypothetical protein, conserved                               | 1,164 | 3,206E-17  |
| TcCLB.510073.75  | hypothetical protein, conserved                               | 1,164 | 0,00003389 |
| TcCLB.509693.80  | hypoxanthine-guanine phosphoribosyltransferase, putative      | 1,163 | 6,488E-26  |
| TcCLB.503721.10  | hypothetical protein, conserved                               | 1,163 | 4,102E-24  |
| TcCLB.505763.10  | proton motive ATPase 1, putative                              | 1,162 | 4,174E-77  |
| TcCLB.509023.180 | kinesin, putative                                             | 1,162 | 2,973E-41  |
| TcCLB.507669.60  | hypothetical protein, conserved                               | 1,162 | 8,887E-22  |
| TcCLB.508375.80  | hypothetical protein, conserved                               | 1,162 | 1,281E-17  |
| TcCLB.507223.10  | dynein heavy chain, cytosolic, putative                       | 1,162 | 4,027E-08  |
| TcCLB.509695.100 | hypothetical protein, conserved                               | 1,161 | 2,001E-24  |
| TcCLB.508487.20  | dispersed gene family protein 1 (DGF-1, pseudogene), putative | 1,161 | 2,814E-09  |
| TcCLB.509921.9   | dispersed gene family protein 1 (DGF-1), putative             | 1,161 | 0,0002949  |
| TcCLB.504153.160 | metallo-peptidase, Clan MA(E) Family M32                      | 1,16  | 1,915E-69  |
| TcCLB.507381.41  | trans-sialidase (pseudogene), putative                        | 1,16  | 2,676E-10  |
| TcCLB.509011.10  | UDP-Gal or UDP-GlcNAc-dependent glycosyltransferase (UGT)     | 1,16  | 4,086E-09  |
| TcCLB.507693.10  | dispersed gene family protein 1 (DGF-1), putative             | 1,16  | 4,607E-08  |
| TcCLB.509859.40  | cytosolic leucyl aminopeptidase, putative                     | 1,159 | 9,947E-39  |
| TcCLB.503881.20  | GDP-mannose 4,6 dehydratase, putative                         | 1,159 | 1,554E-28  |
| TcCLB.509231.23  | hypothetical protein, conserved                               | 1,159 | 4,98E-25   |
| TcCLB.432027.9   | hypothetical protein, conserved                               | 1,159 | 2,481E-12  |
| TcCLB.509895.20  | mitochondrial RNA binding protein, putative                   | 1,158 | 5,988E-45  |
| TcCLB.509151.70  | hypothetical protein, conserved                               | 1,158 | 1,614E-40  |
| TcCLB.507773.34  | 60S ribosomal protein L37, putative                           | 1,158 | 1,12E-34   |
| TcCLB.510851.21  | retrotransposon hot spot protein (RHS, pseudogene), putative  | 1,158 | 1,023E-33  |
| TcCLB.509599.130 | serine/threonine protein kinase, putative                     | 1,158 | 1,158E-28  |
| TcCLB.507521.110 | pumilio/PUF RNA binding protein 5, putative (PUF5)            | 1,158 | 2,657E-25  |
| TcCLB.508981.20  | hypothetical protein, conserved                               | 1,158 | 1,537E-14  |
| TcCLB.508389.50  | mucin-associated surface protein (MASP), putative             | 1,158 | 0,00002892 |
| TcCLB.509473.10  | hypothetical protein (pseudogene)                             | 1,157 | 3,408E-21  |

|                  |                                                              |       |           |
|------------------|--------------------------------------------------------------|-------|-----------|
| TcCLB.510173.130 | hypothetical protein, conserved                              | 1,157 | 6,815E-19 |
| TcCLB.503413.19  | hypothetical protein                                         | 1,157 | 1,119E-17 |
| TcCLB.510325.69  | Aminopeptidase M1, putative (fragment)                       | 1,156 | 1,272E-33 |
| TcCLB.508699.70  | hypothetical protein, conserved                              | 1,156 | 3,508E-31 |
| TcCLB.507927.90  | hypothetical protein, conserved                              | 1,156 | 2,197E-14 |
| TcCLB.503433.30  | hypothetical protein, conserved                              | 1,155 | 1,703E-28 |
| TcCLB.510643.150 | ribosomal P protein AGP2beta-1 (pseudogene), putative        | 1,155 | 1,378E-14 |
| TcCLB.510451.21  | trans-sialidase (pseudogene), putative                       | 1,155 | 0,004707  |
| TcCLB.509429.59  | hypothetical protein, conserved                              | 1,154 | 3,724E-32 |
| TcCLB.507603.140 | leucine-rich repeat protein (LRRP), putative                 | 1,154 | 3,439E-26 |
| TcCLB.510719.74  | hypothetical protein, conserved                              | 1,154 | 9,152E-16 |
| TcCLB.506493.80  | DNA topoisomerase IA, putative                               | 1,153 | 5,537E-41 |
| TcCLB.506351.9   | 5'-3' exoribonuclease A, putative (fragment) (XRNA)          | 1,153 | 5,618E-18 |
| TcCLB.415789.9   | dispersed gene family protein 1 (DGF-1), putative (fragment) | 1,153 | 6,053E-15 |
| TcCLB.506435.270 | dihydroxyacetone phosphate acyltransferase, putative (DA)    | 1,152 | 3,399E-30 |
| TcCLB.509633.50  | serine/threonine-protein phosphatase PP1, putative           | 1,152 | 7,675E-07 |
| TcCLB.506987.10  | retrotransposon hot spot protein (RHS, pseudogene), puta     | 1,152 | 0,0000138 |
| TcCLB.511465.10  | proteasome activator protein pa26, putative                  | 1,151 | 1,553E-19 |
| TcCLB.506559.480 | hypothetical protein, conserved                              | 1,151 | 5,291E-13 |
| TcCLB.506559.350 | asparaginyl-tRNA synthetase, putative                        | 1,15  | 5,125E-59 |
| TcCLB.509381.20  | 40S ribosomal protein S15A, putative                         | 1,15  | 1,513E-44 |
| TcCLB.511587.30  | retrotransposon hot spot protein (RHS, pseudogene), puta     | 1,15  | 1,471E-39 |
| TcCLB.510101.240 | 60S ribosomal protein L24, putative                          | 1,15  | 4,569E-20 |
| TcCLB.507925.40  | pyridoxal kinase, putative                                   | 1,15  | 1,312E-13 |
| TcCLB.506961.130 | retrotransposon hot spot protein (RHS, pseudogene), puta     | 1,149 | 4,634E-29 |
| TcCLB.507663.30  | hypothetical protein, conserved                              | 1,149 | 2,194E-23 |
| TcCLB.504769.170 | retrotransposon hot spot protein (RHS, pseudogene), puta     | 1,149 | 1,852E-21 |
| TcCLB.508799.220 | hypothetical protein, conserved (pseudogene)                 | 1,149 | 0,0004239 |
| TcCLB.509649.50  | hypothetical protein, conserved                              | 1,148 | 1,464E-33 |
| TcCLB.504089.60  | hypothetical protein, conserved                              | 1,148 | 4,181E-29 |
| TcCLB.510237.129 | dispersed gene family protein 1 (DGF-1), putative (fragment) | 1,148 | 5,76E-07  |
| TcCLB.504163.30  | 40S ribosomal protein S9, putative                           | 1,147 | 3,651E-52 |
| TcCLB.508547.30  | acyl-CoA dehydrogenase, mitochondrial precursor, putativ     | 1,147 | 1,044E-30 |
| TcCLB.510603.80  | protein tyrosine phosphatase-like protein, putative          | 1,146 | 5,666E-19 |
| TcCLB.504033.90  | mitochondrial carrier protein, putative                      | 1,145 | 1,87E-33  |
| TcCLB.506503.80  | kinesin, putative                                            | 1,145 | 1,739E-27 |
| TcCLB.511237.50  | 40S ribosomal protein S33, putative                          | 1,144 | 6,464E-40 |
| TcCLB.510381.30  | hypothetical protein, conserved                              | 1,144 | 1,069E-30 |
| TcCLB.504051.20  | ATP-dependent DNA DEAD/DEAH box helicase, putative           | 1,144 | 3,509E-25 |
| TcCLB.509449.10  | receptor-type adenylate cyclase, putative                    | 1,144 | 4,807E-17 |
| TcCLB.504037.30  | 60S ribosomal protein L12, putative                          | 1,143 | 3,806E-44 |
| TcCLB.509219.20  | retrotransposon hot spot (RHS) protein, putative             | 1,143 | 2,037E-37 |
| TcCLB.510101.30  | 60S ribosomal protein L28, putative                          | 1,143 | 8,826E-36 |
| TcCLB.510759.100 | hypothetical protein, conserved                              | 1,143 | 2,452E-33 |
| TcCLB.507093.220 | RNA-binding protein, putative                                | 1,143 | 2,271E-30 |

|                  |                                                             |       |           |
|------------------|-------------------------------------------------------------|-------|-----------|
| TcCLB.504125.40  | ATPase subunit 9, putative                                  | 1,143 | 5,817E-27 |
| TcCLB.506025.14  | ribosomal protein S29, putative                             | 1,143 | 1,359E-24 |
| TcCLB.510359.240 | hypothetical protein, conserved                             | 1,143 | 3,464E-19 |
| TcCLB.503461.30  | hypothetical protein, conserved                             | 1,142 | 7,999E-33 |
| TcCLB.508461.60  | synaptojanin (N-terminal domain), putative                  | 1,142 | 2,688E-25 |
| TcCLB.508995.60  | electron transport protein SCO1/2, putative                 | 1,142 | 4,328E-17 |
| TcCLB.506147.40  | hypothetical protein                                        | 1,141 | 3,737E-20 |
| TcCLB.510225.59  | transporter, putative                                       | 1,141 | 2,613E-10 |
| TcCLB.510431.110 | hypothetical protein                                        | 1,14  | 1,972E-38 |
| TcCLB.508811.10  | hypothetical protein                                        | 1,14  | 2,352E-19 |
| TcCLB.509207.30  | hypothetical protein, conserved                             | 1,14  | 1,67E-16  |
| TcCLB.504139.10  | retrotransposon hot spot protein (RHS, pseudogene), puta    | 1,14  | 5,28E-13  |
| TcCLB.508543.30  | 40S ribosomal protein S9, putative                          | 1,139 | 2,114E-58 |
| TcCLB.506595.100 | 60S acidic ribosomal protein P2, putative                   | 1,139 | 6,051E-39 |
| TcCLB.509725.100 | hypothetical protein, conserved (pseudogene)                | 1,139 | 2,158E-18 |
| TcCLB.509767.240 | hypothetical protein, conserved                             | 1,139 | 1,197E-11 |
| TcCLB.510497.199 | dispersed gene family protein 1 (DGF-1), putative (fragme   | 1,139 | 0,001868  |
| TcCLB.507649.70  | nucleolar RNA-binding protein, putative                     | 1,138 | 1,766E-54 |
| TcCLB.508817.50  | DNA repair protein RAD51, putative (RAD51)                  | 1,138 | 5,741E-44 |
| TcCLB.504741.20  | GTP-binding protein, putative                               | 1,138 | 2,285E-29 |
| TcCLB.507669.20  | hypothetical protein, conserved                             | 1,138 | 1,441E-26 |
| TcCLB.509743.19  | dispersed gene family protein 1 (DGF-1), putative (fragme   | 1,138 | 1,867E-08 |
| TcCLB.508283.10  | dispersed gene family protein 1 (DGF-1), putative           | 1,138 | 2,006E-07 |
| TcCLB.508441.20  | Phosphoenolpyruvate carboxykinase [ATP], glycosomal         | 1,137 | 6,689E-48 |
| TcCLB.503781.90  | universal minicircle sequence binding protein 2, putative ( | 1,137 | 3,316E-34 |
| TcCLB.507547.90  | Phosphoenolpyruvate carboxykinase [ATP], glycosomal         | 1,136 | 7,279E-41 |
| TcCLB.437121.9   | hypothetical protein, conserved (fragment)                  | 1,136 | 7,182E-22 |
| TcCLB.506715.44  | hypothetical protein, conserved                             | 1,135 | 7,045E-14 |
| TcCLB.510155.20  | KREL1                                                       | 1,134 | 2,216E-31 |
| TcCLB.506633.109 | hypothetical protein (fragment)                             | 1,134 | 4,63E-17  |
| TcCLB.418221.30  | hypothetical protein, conserved                             | 1,133 | 4,828E-45 |
| TcCLB.506829.39  | ribosomal protein S7, putative                              | 1,132 | 8,137E-59 |
| TcCLB.511145.46  | 60S ribosomal protein L37a, putative                        | 1,132 | 1,192E-34 |
| TcCLB.508173.100 | Monooxygenase, putative                                     | 1,132 | 1,445E-24 |
| TcCLB.508909.190 | hypothetical protein, conserved                             | 1,132 | 2,278E-21 |
| TcCLB.506209.19  | dispersed gene family protein 1 (DGF-1), putative (fragme   | 1,132 | 0,000879  |
| TcCLB.511559.50  | hypothetical protein, conserved                             | 1,131 | 5,403E-30 |
| TcCLB.509749.36  | ribosomal protein L29, putative                             | 1,131 | 5,41E-28  |
| TcCLB.507179.20  | dispersed gene family protein 1 (DGF-1), putative           | 1,131 | 3,686E-14 |
| TcCLB.509023.30  | hypothetical protein                                        | 1,131 | 1,1E-11   |
| TcCLB.503823.130 | hypothetical protein, conserved                             | 1,13  | 5,037E-43 |
| TcCLB.508777.110 | hypothetical protein, conserved                             | 1,13  | 1,165E-37 |
| TcCLB.506727.60  | hypothetical protein, conserved                             | 1,13  | 5,23E-28  |
| TcCLB.511655.20  | hypothetical protein, conserved                             | 1,13  | 1,341E-18 |
| TcCLB.509903.10  | dispersed gene family protein 1 (DGF-1, pseudogene), put    | 1,13  | 1,51E-17  |

|                  |                                                                  |       |           |
|------------------|------------------------------------------------------------------|-------|-----------|
| TcCLB.509887.19  | dispersed gene family protein 1 (DGF-1), putative                | 1,13  | 1,569E-08 |
| TcCLB.510487.20  | dispersed gene family protein 1 (DGF-1, pseudogene), putative    | 1,13  | 2,227E-06 |
| TcCLB.510877.55  | acyl-CoA binding protein, putative                               | 1,129 | 4,375E-22 |
| TcCLB.510299.10  | hypothetical protein, conserved                                  | 1,129 | 3,81E-18  |
| TcCLB.509749.30  | hypothetical protein, conserved                                  | 1,129 | 1,537E-14 |
| TcCLB.507645.11  | hypothetical protein, conserved (fragment)                       | 1,129 | 5,873E-13 |
| TcCLB.509979.90  | 60S ribosomal protein L35, putative                              | 1,128 | 1,011E-43 |
| TcCLB.506683.140 | beta galactofuranosyl glycosyltransferase (pseudogene), putative | 1,128 | 4,969E-19 |
| TcCLB.507539.10  | hypothetical protein, conserved                                  | 1,128 | 8,581E-09 |
| TcCLB.504339.10  | hypothetical protein, conserved                                  | 1,128 | 9,948E-07 |
| TcCLB.503903.50  | hypothetical protein, conserved                                  | 1,127 | 7,165E-27 |
| TcCLB.506325.33  | ATP-dependent DEAD/H RNA helicase (pseudogene), putative         | 1,127 | 0,0004555 |
| TcCLB.508577.70  | hypothetical protein                                             | 1,126 | 9,448E-31 |
| TcCLB.507681.170 | hypothetical protein, conserved                                  | 1,126 | 2,4E-21   |
| TcCLB.509551.60  | hypothetical protein, conserved                                  | 1,126 | 2,117E-12 |
| TcCLB.509331.180 | aldose 1-epimerase-like protein, putative                        | 1,126 | 2,292E-12 |
| TcCLB.509805.84  | hypothetical protein, conserved                                  | 1,126 | 1,436E-11 |
| TcCLB.506639.50  | dispersed gene family protein 1 (DGF-1, pseudogene), putative    | 1,126 | 5,267E-09 |
| TcCLB.509149.40  | 60S ribosomal protein L19, putative                              | 1,125 | 4,218E-76 |
| TcCLB.506989.30  | ABC transporter, putative                                        | 1,125 | 4,255E-48 |
| TcCLB.507969.10  | vesicular transport-associated repeat protein, putative          | 1,125 | 8,813E-33 |
| TcCLB.510095.10  | hypothetical protein                                             | 1,125 | 0,002229  |
| TcCLB.457101.20  | dynein heavy chain, cytosolic, putative                          | 1,124 | 7,66E-32  |
| TcCLB.509163.90  | retrotransposon hot spot protein (RHS, pseudogene), putative     | 1,124 | 9,33E-26  |
| TcCLB.503733.80  | hypothetical protein, conserved                                  | 1,124 | 2,486E-24 |
| TcCLB.510431.90  | hypothetical protein, conserved                                  | 1,124 | 9,302E-13 |
| TcCLB.508813.15  | heat shock protein 70, putative (fragment)                       | 1,124 | 8,781E-12 |
| TcCLB.508803.19  | dispersed gene family protein 1 (DGF-1), putative                | 1,124 | 1,822E-06 |
| TcCLB.506247.210 | hypothetical protein, conserved                                  | 1,123 | 1,202E-61 |
| TcCLB.508173.10  | retrotransposon hot spot protein (RHS, pseudogene), putative     | 1,123 | 1,263E-38 |
| TcCLB.507093.320 | hypothetical protein, conserved                                  | 1,123 | 4,707E-24 |
| TcCLB.506795.29  | hypothetical protein, conserved                                  | 1,123 | 6,313E-19 |
| TcCLB.510151.19  | fatty acyl CoA synthetase 1, putative                            | 1,123 | 1,808E-18 |
| TcCLB.506325.30  | hypothetical protein, conserved (pseudogene)                     | 1,123 | 4,236E-18 |
| TcCLB.508177.40  | hypothetical protein, conserved                                  | 1,122 | 1,658E-33 |
| TcCLB.503471.10  | protein tyrosine phosphatase, putative                           | 1,122 | 3,45E-21  |
| TcCLB.509047.14  | hypothetical protein, conserved                                  | 1,122 | 1,016E-17 |
| TcCLB.510113.20  | dispersed gene family protein 1 (DGF-1, pseudogene), putative    | 1,122 | 5,877E-12 |
| TcCLB.510357.100 | hypothetical protein, conserved                                  | 1,121 | 1,035E-21 |
| TcCLB.509895.10  | mitochondrial RNA binding complex 1 subunit, putative            | 1,12  | 4,126E-67 |
| TcCLB.506931.70  | hypothetical protein, conserved                                  | 1,12  | 2,676E-28 |
| TcCLB.503439.14  | dispersed gene family protein 1 (DGF-1, pseudogene), putative    | 1,12  | 2,705E-08 |
| TcCLB.508153.100 | acyltransferase, putative                                        | 1,119 | 6,212E-20 |
| TcCLB.506327.90  | serine/threonine protein kinase, putative                        | 1,118 | 6,862E-39 |
| TcCLB.507787.50  | membrane transporter protein (pseudogene), putative              | 1,118 | 4,696E-13 |

|                  |                                                                 |       |            |
|------------------|-----------------------------------------------------------------|-------|------------|
| TcCLB.471403.9   | dispersed gene family protein 1 (DGF-1), putative (fragment)    | 1,118 | 3,981E-12  |
| TcCLB.511477.40  | dispersed gene family protein 1 (DGF-1, pseudogene), putative   | 1,118 | 2,837E-10  |
| TcCLB.507091.4   | fructose kinase, putative                                       | 1,118 | 8,785E-10  |
| TcCLB.509769.63  | Ran-binding protein, putative                                   | 1,117 | 1,108E-20  |
| TcCLB.511649.50  | hypothetical protein, conserved                                 | 1,117 | 4,56E-19   |
| TcCLB.506443.150 | retrotransposon hot spot (RHS) protein, putative                | 1,116 | 1,883E-53  |
| TcCLB.511647.70  | hypothetical protein, conserved                                 | 1,115 | 3,354E-23  |
| TcCLB.506553.20  | bromodomain factor 2 protein                                    | 1,114 | 8,005E-28  |
| TcCLB.506219.20  | hypothetical protein                                            | 1,114 | 1,921E-12  |
| TcCLB.506153.10  | amino acid transporter, putative                                | 1,113 | 6,481E-39  |
| TcCLB.507019.86  | 40S ribosomal protein S30, putative                             | 1,113 | 1,078E-22  |
| TcCLB.507253.30  | hypothetical protein, conserved (pseudogene)                    | 1,113 | 5,383E-14  |
| TcCLB.504035.84  | succinate dehydrogenase subunit                                 | 1,113 | 2,034E-13  |
| TcCLB.507563.9   | dispersed gene family protein 1 (DGF-1), putative (fragment)    | 1,113 | 2,667E-13  |
| TcCLB.506323.10  | dispersed gene family protein 1 (DGF-1, pseudogene), putative   | 1,113 | 2,092E-08  |
| TcCLB.507979.4   | histone H2A, putative                                           | 1,113 | 2,332E-07  |
| TcCLB.509457.10  | hypothetical protein                                            | 1,112 | 1,932E-31  |
| TcCLB.508811.30  | hypothetical protein, conserved                                 | 1,112 | 5,27E-29   |
| TcCLB.508223.30  | retrotransposon hot spot protein (RHS, pseudogene), putative    | 1,112 | 0,00001926 |
| TcCLB.509499.14  | peroxidoxin                                                     | 1,111 | 1,25E-35   |
| TcCLB.503893.80  | NADH dehydrogenase [ubiquinone] iron-sulfur protein 7, putative | 1,111 | 1,929E-22  |
| TcCLB.506885.410 | hypothetical protein, conserved                                 | 1,111 | 5,022E-16  |
| TcCLB.506859.70  | guide RNA associated protein, GAP2, putative                    | 1,111 | 5,422E-47  |
| TcCLB.506149.10  | folate/pteridine transporter, putative                          | 1,111 | 3,805E-17  |
| TcCLB.503735.20  | hypothetical protein                                            | 1,111 | 1,795E-15  |
| TcCLB.410243.10  | hypothetical protein, conserved (fragment)                      | 1,111 | 9,232E-11  |
| TcCLB.505945.30  | ribonuclease mar1, putative                                     | 1,109 | 1,074E-22  |
| TcCLB.511773.40  | hypothetical protein, conserved                                 | 1,109 | 0,00005443 |
| TcCLB.510243.10  | hypothetical protein, conserved                                 | 1,108 | 1,034E-14  |
| TcCLB.511291.90  | 40S ribosomal protein S13, putative                             | 1,107 | 4,292E-47  |
| TcCLB.506135.40  | hypothetical protein, conserved                                 | 1,107 | 6,492E-30  |
| TcCLB.510173.70  | MIX protein, putative                                           | 1,107 | 2,202E-15  |
| TcCLB.487507.10  | trypanothione peroxidase, putative                              | 1,107 | 3,491E-13  |
| TcCLB.510439.30  | hypothetical protein, conserved                                 | 1,106 | 3,224E-34  |
| TcCLB.509001.40  | calpain-like cysteine peptidase, putative                       | 1,105 | 4,914E-40  |
| TcCLB.506459.270 | hypothetical protein, conserved                                 | 1,105 | 5,127E-38  |
| TcCLB.506519.130 | guanosine monophosphate reductase, putative                     | 1,105 | 1,599E-33  |
| TcCLB.510339.20  | hypothetical protein                                            | 1,105 | 1,423E-22  |
| TcCLB.504229.4   | retrotransposon hot spot (RHS) protein, putative                | 1,105 | 2,045E-12  |
| TcCLB.509175.9   | hypothetical protein, conserved                                 | 1,105 | 0,00001856 |
| TcCLB.511653.69  | DNA repair protein, putative (fragment)                         | 1,104 | 5,11E-40   |
| TcCLB.397937.10  | pumilio/PUF RNA binding protein 1, putative (PUF1)              | 1,104 | 5,264E-18  |
| TcCLB.510671.10  | dispersed gene family protein 1 (DGF-1), putative               | 1,104 | 1,128E-10  |
| TcCLB.503779.20  | hypothetical protein, conserved                                 | 1,103 | 2,15E-21   |
| TcCLB.504313.40  | hypothetical protein, conserved (pseudogene)                    | 1,103 | 1,057E-15  |

|                  |                                                          |       |           |
|------------------|----------------------------------------------------------|-------|-----------|
| TcCLB.509871.70  | retrotransposon hot spot protein (RHS, pseudogene), puta | 1,103 | 1,52E-13  |
| TcCLB.508893.30  | hypothetical protein, conserved                          | 1,103 | 7,827E-13 |
| TcCLB.511807.60  | hypothetical protein, conserved                          | 1,102 | 2,114E-28 |
| TcCLB.509455.80  | GTP-binding nuclear protein rtb2, putative               | 1,102 | 4,686E-27 |
| TcCLB.511357.9   | hypothetical protein, conserved                          | 1,102 | 1,094E-24 |
| TcCLB.506401.360 | hypothetical protein, conserved                          | 1,102 | 1,008E-10 |
| TcCLB.509275.10  | elongation factor 1-gamma (EF-1-gamma, pseudogene),      | 1,102 | 0,0002399 |
| TcCLB.510661.80  | hypothetical protein                                     | 1,101 | 6,355E-32 |
| TcCLB.510363.30  | retrotransposon hot spot protein (RHS, pseudogene), puta | 1,101 | 0,0003164 |
| TcCLB.506959.40  | enoyl-CoA hydratase/isomerase family protein, putative   | 1,1   | 6,112E-30 |
| TcCLB.508881.54  | hypothetical protein, conserved                          | 1,1   | 1,443E-17 |
| TcCLB.511517.5   | 70 kDa heat shock protein, putative (fragment)           | 1,1   | 6,142E-09 |
| TcCLB.508587.40  | dispersed gene family protein 1 (DGF-1, pseudogene), put | 1,1   | 3,152E-08 |
| TcCLB.506263.20  | D-isomer specific 2-hydroxyacid dehydrogenase-protein, p | 1,099 | 3,988E-33 |
| TcCLB.504057.97  | hypothetical protein, conserved                          | 1,099 | 6,429E-17 |
| TcCLB.511261.50  | hypothetical protein, conserved                          | 1,099 | 9,515E-16 |
| TcCLB.509557.10  | hypothetical protein                                     | 1,099 | 3,619E-15 |
| TcCLB.507517.104 | hypothetical protein, conserved                          | 1,099 | 1,715E-12 |
| TcCLB.506679.230 | ribosomal protein L24, putative                          | 1,098 | 1,624E-41 |
| TcCLB.509791.80  | hypothetical protein                                     | 1,098 | 5,639E-38 |
| TcCLB.510155.110 | hypothetical protein, conserved                          | 1,098 | 6,258E-21 |
| TcCLB.511007.20  | retrotransposon hot spot (RHS) protein, putative         | 1,098 | 8,71E-12  |
| TcCLB.506831.40  | 3-hydroxy-3-methylglutaryl-CoA reductase (HMGR)          | 1,097 | 2,26E-38  |
| TcCLB.511285.80  | hypothetical protein                                     | 1,097 | 3,713E-35 |
| TcCLB.506495.9   | hypothetical protein, conserved                          | 1,097 | 5,339E-22 |
| TcCLB.511391.90  | endosomal integral membrane protein, putative            | 1,097 | 9,912E-21 |
| TcCLB.511821.90  | hypothetical protein, conserved                          | 1,097 | 2,04E-14  |
| TcCLB.511809.130 | 40S ribosomal protein S15, putative                      | 1,097 | 3,461E-14 |
| TcCLB.506239.10  | hypothetical protein, conserved                          | 1,097 | 1,824E-12 |
| TcCLB.511825.50  | centrin-4, putative (Centrin4)                           | 1,096 | 5,259E-31 |
| TcCLB.510743.100 | chaperone DNAJ protein, putative                         | 1,095 | 1,352E-31 |
| TcCLB.510073.17  | cysteine peptidase (C-terminal), putative                | 1,095 | 1,987E-31 |
| TcCLB.509815.90  | retrotransposon hot spot protein (RHS, pseudogene), puta | 1,094 | 3,249E-17 |
| TcCLB.511323.50  | NADH-ubiquinone oxidoreductase, mitochondrial, putative  | 1,094 | 6,668E-13 |
| TcCLB.511393.30  | formin homology 2 (FH2) domain protein, putative         | 1,093 | 2,005E-41 |
| TcCLB.511303.120 | hypothetical protein, conserved                          | 1,093 | 5,991E-41 |
| TcCLB.508649.5   | tryparedoxin peroxidase, putative (fragment)             | 1,093 | 1,443E-26 |
| TcCLB.509559.20  | retrotransposon hot spot protein (RHS, pseudogene), puta | 1,093 | 4,025E-21 |
| TcCLB.507221.80  | 5'-3' exoribonuclease C, putative (fragment) (XRNC)      | 1,093 | 7,409E-18 |
| TcCLB.508515.20  | translation factor sui1, putative                        | 1,092 | 1,24E-21  |
| TcCLB.511575.10  | hypothetical protein, conserved                          | 1,092 | 3,859E-18 |
| TcCLB.509157.279 | Chaperonin HSP60, mitochondrial (HSP60)                  | 1,092 | 4,778E-11 |
| TcCLB.506563.110 | calpain-like cysteine peptidase (pseudogene), putative   | 1,091 | 1,316E-39 |
| TcCLB.511303.70  | hypothetical protein, conserved                          | 1,091 | 1,802E-19 |
| TcCLB.508771.10  | cysteine peptidase, Clan CA, family C51, putative        | 1,091 | 0,0001686 |

|                  |                                                               |       |           |
|------------------|---------------------------------------------------------------|-------|-----------|
| TcCLB.503757.10  | 40S ribosomal protein SA, putative                            | 1,09  | 2,386E-31 |
| TcCLB.506833.79  | hypothetical protein, conserved (fragment)                    | 1,09  | 6,818E-25 |
| TcCLB.511899.10  | 2-amino-3-ketobutyrate coenzyme A ligase, putative            | 1,09  | 2,879E-08 |
| TcCLB.510823.70  | 60S acidic ribosomal protein, putative                        | 1,089 | 2,04E-23  |
| TcCLB.509979.14  | peroxisomal membrane protein 4, putative                      | 1,089 | 3,357E-22 |
| TcCLB.509919.9   | dispersed gene family protein 1 (DGF-1), putative (fragment)  | 1,089 | 2,984E-13 |
| TcCLB.506649.90  | hypothetical protein, conserved                               | 1,088 | 5,244E-57 |
| TcCLB.507515.10  | glutathione peroxidase-like protein, putative                 | 1,088 | 1,355E-19 |
| TcCLB.503415.10  | hypothetical protein (pseudogene)                             | 1,088 | 2,454E-16 |
| TcCLB.506129.20  | dispersed gene family protein 1 (DGF-1, pseudogene), putative | 1,088 | 0,0003144 |
| TcCLB.494675.10  | fatty acyl CoA synthetase 2, putative                         | 1,087 | 6,496E-27 |
| TcCLB.507603.90  | hypothetical protein                                          | 1,087 | 1,591E-24 |
| TcCLB.506375.120 | hypothetical protein, conserved                               | 1,087 | 1,108E-20 |
| TcCLB.482971.9   | dispersed gene family protein 1 (DGF-1), putative (fragment)  | 1,087 | 0,002544  |
| TcCLB.510645.40  | hypothetical protein, conserved (pseudogene)                  | 1,086 | 1,623E-57 |
| TcCLB.511421.170 | hypothetical protein, conserved                               | 1,086 | 1,316E-24 |
| TcCLB.510785.10  | hypothetical protein                                          | 1,086 | 2,591E-23 |
| TcCLB.503401.29  | hypothetical protein, conserved                               | 1,086 | 5,795E-14 |
| TcCLB.508815.130 | hypothetical protein, conserved                               | 1,085 | 1,166E-32 |
| TcCLB.509289.30  | hypothetical protein, conserved                               | 1,085 | 1,311E-31 |
| TcCLB.507969.60  | C-14 sterol reductase, putative                               | 1,085 | 1,582E-18 |
| TcCLB.510535.30  | hypothetical protein                                          | 1,085 | 2,743E-16 |
| TcCLB.510347.40  | hypothetical protein, conserved                               | 1,084 | 1,908E-27 |
| TcCLB.511127.74  | hypothetical protein, conserved                               | 1,084 | 1,099E-12 |
| TcCLB.509633.60  | serine/threonine-protein phosphatase PP1, putative            | 1,084 | 1,608E-09 |
| TcCLB.506537.250 | hypothetical protein, conserved                               | 1,084 | 1,698E-08 |
| TcCLB.507651.10  | hypothetical protein, conserved (pseudogene)                  | 1,082 | 6,006E-31 |
| TcCLB.511809.90  | hypothetical protein, conserved                               | 1,082 | 3,96E-29  |
| TcCLB.508547.50  | maoC-like dehydratase, putative                               | 1,082 | 2,321E-21 |
| TcCLB.510243.80  | hypothetical protein, conserved                               | 1,082 | 7,095E-19 |
| TcCLB.508409.140 | hypothetical protein, conserved                               | 1,082 | 8,709E-18 |
| TcCLB.509747.104 | hypothetical protein, conserved                               | 1,082 | 2,766E-17 |
| TcCLB.511289.70  | Mitochondrial ADP/ATP carrier protein 5, putative (MCP5)      | 1,081 | 5,392E-37 |
| TcCLB.508909.200 | hypothetical protein                                          | 1,081 | 1,298E-27 |
| TcCLB.503955.80  | hypothetical protein                                          | 1,081 | 1,071E-16 |
| TcCLB.511767.30  | retrotransposon hot spot protein (RHS, pseudogene), putative  | 1,079 | 2,354E-23 |
| TcCLB.507023.150 | hypothetical protein                                          | 1,079 | 3,714E-21 |
| TcCLB.506443.60  | hypothetical protein                                          | 1,078 | 4,927E-22 |
| TcCLB.508879.229 | chaperone DNAJ protein, putative                              | 1,078 | 1,713E-06 |
| TcCLB.508221.714 | retrotransposon hot spot protein (RHS, pseudogene), putative  | 1,078 | 0,01045   |
| TcCLB.510355.70  | retrotransposon hot spot protein (RHS, pseudogene), putative  | 1,077 | 6,583E-18 |
| TcCLB.511665.15  | dispersed gene family protein 1 (DGF-1), putative (fragment)  | 1,077 | 0,0001632 |
| TcCLB.510835.40  | 60S ribosomal protein L7a, putative                           | 1,076 | 8,247E-45 |
| TcCLB.508277.65  | hypothetical protein, conserved                               | 1,076 | 1,479E-16 |
| TcCLB.511417.90  | phosphate-repressible phosphate permease, putative            | 1,076 | 3,623E-10 |

|                  |                                                                 |       |            |
|------------------|-----------------------------------------------------------------|-------|------------|
| TcCLB.508543.90  | plasma membrane Ca <sup>2+</sup> ATPase                         | 1,075 | 4,442E-30  |
| TcCLB.503671.10  | Aminopeptidase M1, putative (fragment)                          | 1,075 | 4,68E-19   |
| TcCLB.510267.20  | 60S acidic ribosomal protein P2, putative                       | 1,075 | 3,233E-18  |
| TcCLB.508063.9   | dispersed gene family protein 1 (DGF-1), putative (fragment)    | 1,075 | 0,00002135 |
| TcCLB.504839.28  | tryparedoxin peroxidase, putative                               | 1,074 | 4,038E-34  |
| TcCLB.511583.40  | tricarboxylate carrier, putative                                | 1,074 | 2,423E-24  |
| TcCLB.509009.10  | dynein heavy chain, cytosolic, putative                         | 1,074 | 1,906E-18  |
| TcCLB.507009.30  | ribulose-phosphate 3-epimerase, putative                        | 1,074 | 3,936E-14  |
| TcCLB.509649.40  | hypothetical protein                                            | 1,073 | 3,139E-26  |
| TcCLB.509967.170 | dynein arm light chain, putative                                | 1,073 | 2,542E-25  |
| TcCLB.507883.109 | mitochondrial malate dehydrogenase, putative                    | 1,072 | 4,847E-44  |
| TcCLB.506937.30  | 60S ribosomal protein L14, putative                             | 1,072 | 2,144E-36  |
| TcCLB.510337.40  | spermidine synthase, putative                                   | 1,072 | 6,565E-35  |
| TcCLB.511431.40  | glutaredoxin, putative                                          | 1,072 | 9,399E-16  |
| TcCLB.511819.14  | small nuclear ribonucleoprotein, putative                       | 1,072 | 2,014E-15  |
| TcCLB.508023.40  | retrotransposon hot spot (RHS) protein, putative                | 1,072 | 1,497E-11  |
| TcCLB.510629.120 | dispersed gene family protein 1 (DGF-1, pseudogene), putative   | 1,072 | 0,0212     |
| TcCLB.506195.300 | deoxyhypusine synthase, putative                                | 1,071 | 9,078E-26  |
| TcCLB.510733.50  | hypothetical protein, conserved                                 | 1,07  | 2,524E-41  |
| TcCLB.509795.40  | hypothetical protein, conserved                                 | 1,07  | 3,092E-18  |
| TcCLB.503599.10  | protein kinase, putative                                        | 1,07  | 8,703E-11  |
| TcCLB.510359.630 | retrotransposon hot spot protein (RHS, pseudogene), putative    | 1,07  | 0,00008731 |
| TcCLB.508221.440 | trans-sialidase (pseudogene), putative                          | 1,07  | 0,0003773  |
| TcCLB.504119.29  | deoxyhypusine synthase, putative                                | 1,069 | 6,852E-26  |
| TcCLB.506183.9   | pyruvate dehydrogenase (lipoamide) kinase, putative (fragment)  | 1,069 | 3,183E-12  |
| TcCLB.507537.30  | cysteinyl-tRNA synthetase, putative                             | 1,068 | 4,235E-37  |
| TcCLB.503997.19  | hypothetical protein, conserved                                 | 1,068 | 2,345E-16  |
| TcCLB.506487.37  | hypothetical protein                                            | 1,068 | 0,0001265  |
| TcCLB.509141.20  | hypothetical protein                                            | 1,067 | 1,055E-10  |
| TcCLB.508137.40  | hypothetical protein, conserved                                 | 1,067 | 0,001329   |
| TcCLB.508041.30  | 40S ribosomal protein S15A, putative                            | 1,066 | 8,222E-58  |
| TcCLB.506595.149 | retrotransposon hot spot (RHS) protein, putative                | 1,066 | 2,937E-43  |
| TcCLB.511023.10  | pyrroline-5-carboxylate synthetase-like protein, putative       | 1,066 | 4,59E-24   |
| TcCLB.508569.20  | ubiquitin-conjugating enzyme E2, putative                       | 1,066 | 1,379E-23  |
| TcCLB.509569.44  | Present in the outer mitochondrial membrane proteome            | 1,066 | 2,935E-14  |
| TcCLB.509295.90  | hypothetical protein                                            | 1,066 | 2,818E-10  |
| TcCLB.511287.120 | 40S ribosomal protein S2, putative                              | 1,065 | 4,331E-44  |
| TcCLB.511667.120 | dispersed gene family protein 1 (DGF-1, pseudogene), putative   | 1,065 | 2,823E-08  |
| TcCLB.508221.199 | elongation factor 1-gamma (EF-1-gamma), putative                | 1,065 | 0,002215   |
| TcCLB.511911.30  | mismatch repair protein MSH4 (pseudogene), putative             | 1,064 | 4,237E-21  |
| TcCLB.509725.126 | N-acetyltransferase complex ARD1 subunit (pseudogene), putative | 1,064 | 0,0001224  |
| TcCLB.506369.60  | hypothetical protein, conserved                                 | 1,063 | 4,372E-12  |
| TcCLB.509891.60  | hypothetical protein, conserved                                 | 1,062 | 4,759E-15  |
| TcCLB.507485.60  | hypothetical protein, conserved                                 | 1,06  | 2,638E-22  |
| TcCLB.510359.120 | hypothetical protein, conserved (pseudogene)                    | 1,06  | 1,455E-20  |



|                  |                                                          |       |            |
|------------------|----------------------------------------------------------|-------|------------|
| TcCLB.511577.100 | hypothetical protein, conserved                          | 1,06  | 3,163E-16  |
| TcCLB.510101.180 | 40S ribosomal protein S5, putative                       | 1,06  | 6,571E-06  |
| TcCLB.506843.137 | retrotransposon hot spot protein (RHS, pseudogene), puta | 1,06  | 0,001092   |
| TcCLB.506443.40  | mitochondrial pyruvate carrier protein 2, putative       | 1,059 | 2,41E-21   |
| TcCLB.508953.10  | hypothetical protein, conserved                          | 1,059 | 5,083E-10  |
| TcCLB.510101.420 | 40S ribosomal protein S21, putative                      | 1,058 | 2,525E-45  |
| TcCLB.506989.190 | heat shock protein 90, putative (LPG3)                   | 1,058 | 7,874E-37  |
| TcCLB.510187.530 | hypothetical protein, conserved                          | 1,058 | 6,102E-26  |
| TcCLB.511929.30  | retrotransposon hot spot (RHS) protein, putative         | 1,058 | 8,522E-16  |
| TcCLB.508153.300 | hypothetical protein, conserved                          | 1,057 | 5,731E-38  |
| TcCLB.511237.60  | 40S ribosomal protein S33, putative                      | 1,057 | 1,633E-36  |
| TcCLB.503575.60  | protein kinase, putative                                 | 1,057 | 6,941E-26  |
| TcCLB.511827.50  | hypothetical protein                                     | 1,057 | 9,366E-13  |
| TcCLB.510279.290 | dispersed gene family protein 1 (DGF-1, pseudogene), put | 1,057 | 0,0000173  |
| TcCLB.506135.9   | heat shock 70 kDa protein, putative (fragment)           | 1,056 | 3,36E-37   |
| TcCLB.509053.140 | succinate dehydrogenase subunit                          | 1,056 | 1,377E-30  |
| TcCLB.508799.60  | DNA ligase, putative                                     | 1,056 | 7,132E-16  |
| TcCLB.509891.40  | hypothetical protein, conserved                          | 1,055 | 1,495E-16  |
| TcCLB.507711.20  | paraflagellar rod component, putative (PFC16)            | 1,055 | 4,218E-11  |
| TcCLB.511817.151 | histone H2A, putative                                    | 1,055 | 0,001904   |
| TcCLB.510711.10  | trans-sialidase (pseudogene), putative                   | 1,055 | 0,01144    |
| TcCLB.511041.40  | hexose transporter, putative                             | 1,054 | 0,0001417  |
| TcCLB.506843.75  | hypothetical protein, conserved (pseudogene)             | 1,054 | 0,0003609  |
| TcCLB.510293.54  | hypothetical protein, conserved                          | 1,053 | 3,418E-25  |
| TcCLB.507659.10  | hypothetical protein, conserved                          | 1,053 | 9,125E-22  |
| TcCLB.511239.90  | hypothetical protein                                     | 1,053 | 1,271E-19  |
| TcCLB.511229.30  | hypothetical protein, conserved                          | 1,052 | 2,015E-20  |
| TcCLB.507619.10  | hypothetical protein, conserved (fragment)               | 1,052 | 4,467E-17  |
| TcCLB.510849.11  | retrotransposon hot spot protein (RHS, pseudogene), puta | 1,052 | 5,865E-07  |
| TcCLB.507105.40  | 60S ribosomal protein L44 (RPL44)                        | 1,051 | 1,511E-19  |
| TcCLB.509019.21  | retrotransposon hot spot protein (RHS, pseudogene), puta | 1,051 | 1,209E-16  |
| TcCLB.508677.60  | hypothetical protein                                     | 1,051 | 9,621E-08  |
| TcCLB.511805.15  | ribosomal protein S29, putative                          | 1,051 | 0,0008715  |
| TcCLB.506503.50  | hypothetical protein, conserved                          | 1,05  | 2,155E-27  |
| TcCLB.509849.30  | hypothetical protein                                     | 1,049 | 1,443E-39  |
| TcCLB.510323.20  | hypothetical protein, conserved                          | 1,049 | 1,673E-36  |
| TcCLB.507927.60  | hypothetical protein, conserved                          | 1,049 | 8,8E-35    |
| TcCLB.511909.40  | Succinate dehydrogenase [ubiquinone] flavoprotein subun  | 1,049 | 2,79E-33   |
| TcCLB.504069.80  | ATP synthase F1 subunit gamma protein, putative (ATPF1   | 1,049 | 7,914E-21  |
| TcCLB.511431.60  | hypothetical protein, conserved                          | 1,049 | 7,147E-11  |
| TcCLB.425785.18  | hypothetical protein, conserved                          | 1,049 | 0,00004267 |
| TcCLB.510507.29  | hypothetical protein, conserved                          | 1,048 | 9,451E-14  |
| TcCLB.509013.19  | calpain-like cysteine peptidase, putative (fragment)     | 1,048 | 4,781E-06  |
| TcCLB.508737.100 | ATP-dependent Clp protease subunit, heat shock protein 7 | 1,047 | 9,417E-27  |
| TcCLB.510941.3   | protein kinase, putative (fragment)                      | 1,047 | 3,641E-20  |

|                  |                                                          |       |           |
|------------------|----------------------------------------------------------|-------|-----------|
| TcCLB.504049.40  | retrotransposon hot spot protein (RHS, pseudogene), puta | 1,047 | 1,828E-16 |
| TcCLB.511825.220 | alanyl-tRNA synthetase, putative                         | 1,046 | 7,945E-50 |
| TcCLB.506829.90  | conserved protein                                        | 1,046 | 2,182E-37 |
| TcCLB.511239.110 | hypothetical protein, conserved                          | 1,046 | 9,489E-25 |
| TcCLB.470169.9   | hypothetical protein, conserved                          | 1,046 | 8,922E-13 |
| TcCLB.508637.40  | hypothetical protein, conserved                          | 1,046 | 8,517E-10 |
| TcCLB.510667.100 | hypothetical protein, conserved                          | 1,045 | 1,444E-32 |
| TcCLB.508083.10  | Present in the outer mitochondrial membrane proteome 1   | 1,045 | 6,66E-31  |
| TcCLB.511001.40  | hypothetical protein                                     | 1,045 | 1,449E-21 |
| TcCLB.511233.59  | hypothetical protein, conserved                          | 1,045 | 2,455E-18 |
| TcCLB.510855.20  | hypothetical protein, conserved                          | 1,044 | 8,412E-15 |
| TcCLB.506563.200 | calpain cysteine peptidase, putative                     | 1,043 | 3,836E-27 |
| TcCLB.508787.20  | hypothetical protein                                     | 1,043 | 1,95E-25  |
| TcCLB.509913.10  | 3-methylcrotonyl-CoA carboxylase, putative               | 1,043 | 3,207E-24 |
| TcCLB.510257.100 | mitochondrial RNA binding complex 1 subunit, putative    | 1,042 | 1,528E-33 |
| TcCLB.506331.174 | dispersed gene family protein 1 (DGF-1, pseudogene), put | 1,042 | 7,082E-07 |
| TcCLB.506627.20  | hypothetical protein, conserved                          | 1,041 | 1,085E-37 |
| TcCLB.509047.40  | hypothetical protein, conserved                          | 1,041 | 1,096E-34 |
| TcCLB.506675.20  | hypothetical protein, conserved (pseudogene)             | 1,041 | 1,47E-22  |
| TcCLB.507943.30  | histone H4, putative                                     | 1,041 | 3,296E-21 |
| TcCLB.510101.430 | 40S ribosomal protein S21, putative                      | 1,041 | 2,812E-18 |
| TcCLB.507551.9   | dispersed gene family protein 1 (DGF-1), putative        | 1,041 | 4,749E-15 |
| TcCLB.438059.10  | serine/threonine-protein phosphatase PP1 alpha           | 1,041 | 2,937E-09 |
| TcCLB.509505.70  | 10 kDa heat shock protein, putative                      | 1,041 | 0,1265    |
| TcCLB.510395.10  | ATP synthase F1, alpha subunit, putative (ATPF1A)        | 1,04  | 3,788E-25 |
| TcCLB.507711.300 | Archaic translocase of outer membrane 11 kDa subunit, p  | 1,04  | 4,006E-13 |
| TcCLB.506629.40  | hypothetical protein, conserved                          | 1,039 | 7,755E-37 |
| TcCLB.508501.290 | Kinesin-13 1, putative (KIN13-1)                         | 1,039 | 7,012E-36 |
| TcCLB.509109.50  | hypothetical protein                                     | 1,039 | 4,112E-28 |
| TcCLB.510861.30  | hypothetical protein, conserved                          | 1,039 | 4,252E-24 |
| TcCLB.510661.70  | hypothetical protein, conserved                          | 1,039 | 1,879E-16 |
| TcCLB.506925.400 | hypothetical protein, conserved                          | 1,038 | 9,354E-29 |
| TcCLB.511209.54  | ribosomal protein S29, putative                          | 1,038 | 7,353E-26 |
| TcCLB.505945.80  | hypothetical protein, conserved                          | 1,038 | 9,106E-21 |
| TcCLB.508257.180 | hypothetical protein, conserved                          | 1,038 | 1,076E-19 |
| TcCLB.506695.7   | hypothetical protein, conserved                          | 1,038 | 2,086E-11 |
| TcCLB.510447.10  | dispersed gene family protein 1 (DGF-1), putative        | 1,038 | 0,08473   |
| TcCLB.508909.20  | guanosine monophosphate reductase, putative              | 1,037 | 1,458E-40 |
| TcCLB.506363.90  | amidohydrolase, putative                                 | 1,037 | 3,686E-21 |
| TcCLB.506831.10  | hypothetical protein                                     | 1,037 | 3,589E-20 |
| TcCLB.509549.110 | hypothetical protein, conserved (pseudogene)             | 1,036 | 8,517E-23 |
| TcCLB.506859.240 | hypothetical protein, conserved                          | 1,036 | 0,0001209 |
| TcCLB.509007.99  | P-glycoprotein (pseudogene) (tcpgp1)                     | 1,035 | 6,711E-32 |
| TcCLB.510101.360 | hypothetical protein, conserved                          | 1,035 | 8,113E-29 |
| TcCLB.506855.250 | hypothetical protein, conserved                          | 1,035 | 2,072E-25 |

|                  |                                                               |       |            |
|------------------|---------------------------------------------------------------|-------|------------|
| TcCLB.511001.150 | hypothetical protein, conserved                               | 1,035 | 6,25E-15   |
| TcCLB.503579.60  | hypothetical protein                                          | 1,035 | 8,93E-14   |
| TcCLB.508475.10  | ribosomal protein S20, putative                               | 1,034 | 6,084E-20  |
| TcCLB.508153.164 | hypothetical protein, conserved                               | 1,034 | 3,006E-16  |
| TcCLB.507529.10  | hypothetical Zinc-finger containing protein                   | 1,034 | 6,707E-13  |
| TcCLB.505957.20  | dispersed gene family protein 1 (DGF-1, pseudogene), putative | 1,034 | 4,481E-08  |
| TcCLB.510483.280 | 90 kDa surface protein, putative                              | 1,034 | 1,349E-06  |
| TcCLB.511049.40  | leucyl-tRNA synthetase, putative                              | 1,033 | 5,359E-44  |
| TcCLB.511727.270 | RNA-binding protein, putative                                 | 1,033 | 2,381E-42  |
| TcCLB.506485.10  | hypothetical protein, conserved                               | 1,033 | 1,054E-11  |
| TcCLB.506839.89  | mitochondrial chaperone BCS1, putative (fragment)             | 1,033 | 1,587E-09  |
| TcCLB.504011.70  | hypothetical protein, conserved                               | 1,033 | 4,097E-06  |
| TcCLB.503539.30  | GTP-binding nuclear protein rtb2, putative                    | 1,032 | 9,928E-41  |
| TcCLB.509695.184 | 40S ribosomal protein S23, putative                           | 1,032 | 2,827E-38  |
| TcCLB.511903.170 | hypothetical protein, conserved                               | 1,032 | 5,606E-27  |
| TcCLB.509149.60  | 60S ribosomal protein L19, putative                           | 1,032 | 2,066E-19  |
| TcCLB.511165.54  | pterin-4-alpha-carbinolamine dehydratase, putative            | 1,032 | 9,931E-17  |
| TcCLB.511801.34  | hypothetical protein, conserved                               | 1,032 | 4,22E-16   |
| TcCLB.511051.80  | DNA/RNA non-specific endonuclease protein-like, putative      | 1,031 | 1,736E-12  |
| TcCLB.507783.10  | ribosomal P protein AGP2beta-1, putative                      | 1,031 | 4,611E-08  |
| TcCLB.506271.30  | retrotransposon hot spot (RHS) protein, putative (fragment)   | 1,031 | 3,227E-07  |
| TcCLB.508189.20  | dispersed gene family protein 1 (DGF-1, pseudogene), putative | 1,031 | 0,00003451 |
| TcCLB.504001.20  | hypothetical protein, conserved                               | 1,03  | 7,718E-18  |
| TcCLB.508677.90  | hypothetical protein, conserved                               | 1,03  | 2,07E-08   |
| TcCLB.508125.65  | elongation factor 1-gamma (EF-1-gamma, pseudogene), putative  | 1,03  | 0,0003845  |
| TcCLB.504181.20  | 40S ribosomal protein S23, putative                           | 1,029 | 6,807E-50  |
| TcCLB.503395.50  | 40S ribosomal protein S12, putative                           | 1,029 | 2,099E-36  |
| TcCLB.510815.9   | dispersed gene family protein 1 (DGF-1), putative             | 1,029 | 1,933E-16  |
| TcCLB.511109.130 | heterogeneous nuclear ribonucleoprotein H/F, putative         | 1,028 | 6,899E-21  |
| TcCLB.509437.183 | hypothetical protein, conserved (pseudogene)                  | 1,028 | 1,011E-16  |
| TcCLB.507501.10  | retrotransposon hot spot (RHS) protein, putative              | 1,027 | 1,847E-75  |
| TcCLB.504069.56  | 60S ribosomal protein L37a, putative                          | 1,027 | 9,113E-27  |
| TcCLB.507721.20  | clathrin assembly protein (pseudogene), putative              | 1,027 | 1,301E-24  |
| TcCLB.503467.20  | hypothetical protein, conserved                               | 1,027 | 1,598E-24  |
| TcCLB.503905.50  | hypothetical protein, conserved                               | 1,027 | 7,208E-09  |
| TcCLB.506999.191 | hypothetical protein, conserved (fragment)                    | 1,027 | 0,00003585 |
| TcCLB.511817.180 | histone H2A, putative                                         | 1,027 | 0,001973   |
| TcCLB.507019.40  | histidyl-tRNA synthetase                                      | 1,026 | 1,219E-32  |
| TcCLB.506775.180 | hypothetical protein, conserved                               | 1,026 | 2,318E-31  |
| TcCLB.506779.190 | Unconventional myosin                                         | 1,026 | 4,8E-21    |
| TcCLB.509875.120 | trans-sialidase, Group II, putative                           | 1,026 | 1,167E-12  |
| TcCLB.509779.4   | hypothetical protein, conserved                               | 1,025 | 3,52E-13   |
| TcCLB.507681.150 | 40S ribosomal protein S24E, putative                          | 1,024 | 1,474E-19  |
| TcCLB.510359.371 | elongation factor 1-gamma (EF-1-gamma, pseudogene), putative  | 1,024 | 2,271E-06  |
| TcCLB.507039.10  | iron superoxide dismutase, putative                           | 1,023 | 1,238E-29  |

|                  |                                                          |       |            |
|------------------|----------------------------------------------------------|-------|------------|
| TcCLB.506945.320 | hypothetical protein, conserved                          | 1,023 | 7,978E-23  |
| TcCLB.507521.150 | dispersed gene family protein 1 (DGF-1), putative        | 1,023 | 7,777E-10  |
| TcCLB.510145.20  | cofilin/actin depolymerizing factor, putative            | 1,022 | 3,154E-29  |
| TcCLB.506775.14  | hypothetical protein, conserved                          | 1,022 | 1,329E-20  |
| TcCLB.510839.20  | hypothetical protein                                     | 1,022 | 1,445E-15  |
| TcCLB.506581.14  | peptidyl-prolyl cis-trans isomerase, putative            | 1,022 | 3,809E-12  |
| TcCLB.508781.10  | structural maintenance of chromosome protein 4 (pseudo   | 1,022 | 2,088E-06  |
| TcCLB.507007.70  | hypothetical protein, conserved                          | 1,021 | 2,251E-17  |
| TcCLB.507993.36  | hypothetical protein, conserved                          | 1,021 | 4,062E-10  |
| TcCLB.506679.250 | ribosomal protein L24, putative                          | 1,02  | 1,514E-37  |
| TcCLB.505807.20  | hypothetical protein, conserved                          | 1,02  | 2,71E-21   |
| TcCLB.503555.30  | trypanothione reductase, putative                        | 1,02  | 1,89E-19   |
| TcCLB.510665.60  | hypothetical protein, conserved (pseudogene)             | 1,02  | 2,961E-19  |
| TcCLB.507523.75  | mucin TcMUCII (pseudogene), putative                     | 1,02  | 0,001608   |
| TcCLB.508355.420 | cation transporter protein, putative                     | 1,019 | 1,658E-16  |
| TcCLB.504769.89  | hypothetical protein, conserved                          | 1,019 | 5,303E-14  |
| TcCLB.511487.130 | trans-sialidase (pseudogene), putative                   | 1,019 | 0,00004793 |
| TcCLB.508561.10  | dispersed gene family protein 1 (DGF-1), putative        | 1,019 | 0,0001121  |
| TcCLB.509857.50  | bilobe protein, conserved                                | 1,018 | 3,495E-29  |
| TcCLB.510431.30  | amino acid permease, putative                            | 1,018 | 9,497E-18  |
| TcCLB.508975.4   | hypothetical protein, conserved (fragment)               | 1,018 | 7,927E-12  |
| TcCLB.506659.35  | hypothetical protein, conserved                          | 1,018 | 5,841E-09  |
| TcCLB.507871.9   | dispersed gene family protein 1 (DGF-1), putative        | 1,018 | 0,003351   |
| TcCLB.508319.10  | hypothetical protein                                     | 1,018 | 0,02988    |
| TcCLB.511067.20  | 60S ribosomal protein L26, putative                      | 1,017 | 2,874E-38  |
| TcCLB.503395.40  | 60S ribosomal protein L18, putative                      | 1,017 | 2,209E-34  |
| TcCLB.508457.20  | hypothetical protein, conserved                          | 1,017 | 1,032E-25  |
| TcCLB.510719.140 | hypothetical protein, conserved                          | 1,017 | 1,927E-18  |
| TcCLB.508547.160 | hypothetical protein, conserved                          | 1,017 | 6,295E-18  |
| TcCLB.507519.154 | hypothetical protein, conserved                          | 1,017 | 2,189E-14  |
| TcCLB.506063.20  | retrotransposon hot spot protein (RHS, pseudogene), puta | 1,017 | 1,604E-13  |
| TcCLB.509087.20  | dispersed gene family protein 1 (DGF-1), putative        | 1,017 | 2,079E-09  |
| TcCLB.505647.10  | hypothetical protein, conserved                          | 1,016 | 1,124E-34  |
| TcCLB.506825.190 | hypothetical protein                                     | 1,016 | 5,788E-20  |
| TcCLB.508879.120 | hypothetical protein, conserved                          | 1,016 | 1,166E-19  |
| TcCLB.507573.10  | hypothetical protein, conserved (pseudogene)             | 1,016 | 1,084E-17  |
| TcCLB.511111.20  | hypothetical protein                                     | 1,016 | 4,778E-17  |
| TcCLB.507725.9   | dispersed gene family protein 1 (DGF-1, pseudogene), put | 1,016 | 1,613E-11  |
| TcCLB.503965.39  | hypothetical protein, conserved                          | 1,016 | 1,285E-09  |
| TcCLB.510769.49  | 40S ribosomal protein S6, putative                       | 1,015 | 1,713E-44  |
| TcCLB.507873.30  | Double RNA binding domain protein 7 (DRBD7)              | 1,015 | 5,02E-28   |
| TcCLB.508827.70  | 40S ribosomal protein S17, putative                      | 1,015 | 2,372E-27  |
| TcCLB.510943.40  | protein kinase, putative                                 | 1,015 | 4,894E-26  |
| TcCLB.506637.10  | hypothetical protein, conserved                          | 1,015 | 2,105E-23  |
| TcCLB.506367.170 | hypothetical protein                                     | 1,015 | 2,861E-22  |

|                  |                                                            |       |            |
|------------------|------------------------------------------------------------|-------|------------|
| TcCLB.504797.20  | hypothetical protein, conserved                            | 1,015 | 6,719E-21  |
| TcCLB.503891.50  | hypothetical protein, conserved                            | 1,015 | 4,008E-19  |
| TcCLB.506157.30  | retrotransposon hot spot protein (RHS, pseudogene), puta   | 1,015 | 3,449E-14  |
| TcCLB.509065.36  | hypothetical protein, conserved                            | 1,015 | 1,935E-12  |
| TcCLB.506375.80  | hypothetical protein, conserved                            | 1,015 | 4,769E-09  |
| TcCLB.503967.19  | hypothetical protein                                       | 1,015 | 5,942E-08  |
| TcCLB.509845.9   | dispersed gene family protein 1 (DGF-1), putative          | 1,015 | 0,00003913 |
| TcCLB.506963.10  | 60S ribosomal protein L10a, putative                       | 1,014 | 1,17E-44   |
| TcCLB.507991.123 | hypothetical protein, conserved                            | 1,014 | 1,117E-14  |
| TcCLB.508183.29  | hypothetical protein, conserved (fragment)                 | 1,014 | 1,1E-11    |
| TcCLB.511769.20  | dispersed gene family protein 1 (DGF-1), putative          | 1,014 | 7,322E-09  |
| TcCLB.509437.140 | retrotransposon hot spot protein (RHS, pseudogene), puta   | 1,014 | 2,299E-07  |
| TcCLB.511487.30  | dispersed gene family protein 1 (DGF-1), putative          | 1,014 | 9,785E-06  |
| TcCLB.510625.240 | cell-surface protein (cysteine-rich repeat motif) (pseudog | 1,014 | 0,0461     |
| TcCLB.510311.10  | hypothetical protein, conserved                            | 1,013 | 3,141E-25  |
| TcCLB.506223.60  | hypothetical protein, conserved                            | 1,013 | 5,13E-14   |
| TcCLB.511809.99  | 40S ribosomal protein S15, putative                        | 1,013 | 2,376E-11  |
| TcCLB.508001.106 | serine/threonine protein kinase (pseudogene), putative     | 1,013 | 0,0004238  |
| TcCLB.503905.10  | myosin heavy chain, putative                               | 1,012 | 3,496E-23  |
| TcCLB.511589.10  | ATP synthase, putative                                     | 1,012 | 8,962E-21  |
| TcCLB.506845.21  | N-acetyltransferase complex ARD1 subunit (pseudogene),     | 1,012 | 0,03862    |
| TcCLB.509607.40  | hypothetical protein                                       | 1,011 | 3,019E-18  |
| TcCLB.506559.70  | hypothetical protein, conserved                            | 1,011 | 1,111E-16  |
| TcCLB.503607.7   | glycine dehydrogenase (pseudogene), putative               | 1,011 | 5,551E-13  |
| TcCLB.511753.9   | hypothetical protein, conserved                            | 1,011 | 2,44E-09   |
| TcCLB.504195.9   | dispersed gene family protein 1 (DGF-1, pseudogene), put   | 1,011 | 0,0003213  |
| TcCLB.510425.19  | 40S ribosomal protein SA, putative                         | 1,01  | 5,594E-32  |
| TcCLB.510407.20  | hypothetical protein, conserved                            | 1,01  | 1,095E-22  |
| TcCLB.509099.89  | hypothetical protein, conserved                            | 1,01  | 1,124E-17  |
| TcCLB.507831.90  | 60S ribosomal protein L34, putative                        | 1,01  | 1,08E-14   |
| TcCLB.507801.200 | dispersed gene family protein 1 (DGF-1), putative          | 1,01  | 0,01449    |
| TcCLB.510357.80  | hypothetical protein, conserved                            | 1,009 | 5,751E-18  |
| TcCLB.511621.120 | hypothetical protein, conserved                            | 1,009 | 7,33E-10   |
| TcCLB.508293.100 | chitin-binding like protein, putative                      | 1,009 | 0,02973    |
| TcCLB.511051.39  | 40S ribosomal protein S4, putative                         | 1,008 | 6,12E-40   |
| TcCLB.511237.10  | thimet oligopeptidase, putative                            | 1,008 | 9,637E-27  |
| TcCLB.508461.480 | 60S ribosomal protein L23, putative                        | 1,007 | 2,357E-46  |
| TcCLB.511671.149 | phosphate transporter, putative (PHO91)                    | 1,007 | 4,637E-19  |
| TcCLB.505999.10  | phosphate-repressible phosphate permease, putative         | 1,007 | 6,062E-19  |
| TcCLB.506275.20  | ATP-dependent protease subunit HslV, putative (HslV)       | 1,007 | 3,856E-17  |
| TcCLB.507021.40  | hypothetical protein, conserved                            | 1,007 | 9,286E-11  |
| TcCLB.510101.40  | 60S ribosomal protein L28, putative                        | 1,006 | 1,525E-40  |
| TcCLB.508827.79  | 40S ribosomal protein S17, putative                        | 1,006 | 2,455E-34  |
| TcCLB.511751.260 | hypothetical protein, conserved                            | 1,006 | 2,916E-08  |
| TcCLB.506963.20  | 60S ribosomal protein L34, putative                        | 1,005 | 1,215E-40  |

|                  |                                                           |        |            |
|------------------|-----------------------------------------------------------|--------|------------|
| TcCLB.505843.10  | glutamate dehydrogenase, putative                         | 1,005  | 6,735E-26  |
| TcCLB.509799.30  | adenyl cyclase-associated protein, putative               | 1,005  | 3,489E-17  |
| TcCLB.511001.120 | 60S ribosomal protein L18a, putative                      | 1,004  | 2,714E-52  |
| TcCLB.509695.150 | kinesin, putative                                         | 1,004  | 1,523E-51  |
| TcCLB.506181.59  | 40S ribosomal protein S12, putative                       | 1,004  | 9,728E-34  |
| TcCLB.511807.253 | hypothetical protein, conserved                           | 1,004  | 1,724E-24  |
| TcCLB.510609.50  | nuclear receptor binding factor, putative                 | 1,004  | 5,404E-17  |
| TcCLB.463155.10  | retrotransposon hot spot protein (RHS, pseudogene), puta  | 1,004  | 1,883E-13  |
| TcCLB.508197.10  | 60S ribosomal protein L11, putative                       | 1,003  | 2,145E-37  |
| TcCLB.506727.50  | hypothetical protein, conserved                           | 1,003  | 1,131E-21  |
| TcCLB.505037.40  | hypothetical protein, conserved                           | 1,003  | 1,156E-17  |
| TcCLB.507009.50  | hypothetical protein, conserved                           | 1,003  | 6,968E-15  |
| TcCLB.503599.30  | hypothetical protein, conserved                           | 1,003  | 1,089E-12  |
| TcCLB.511133.20  | thymidine kinase, putative                                | 1,003  | 2,204E-10  |
| TcCLB.457109.9   | dispersed gene family protein 1 (DGF-1), putative (fragme | 1,003  | 5,684E-10  |
| TcCLB.511569.14  | dispersed gene family protein 1 (DGF-1), putative         | 1,003  | 1,322E-08  |
| TcCLB.510219.30  | CPSF 30 kDa subunit, putative (CPSF30)                    | 1,002  | 2,717E-18  |
| TcCLB.507895.110 | hypothetical protein, conserved                           | 1,002  | 4,123E-15  |
| TcCLB.510195.9   | dispersed gene family protein 1 (DGF-1), putative         | 1,002  | 1,251E-08  |
| TcCLB.511173.483 | mucin TcMUCII (pseudogene), putative                      | 1,002  | 0,004105   |
| TcCLB.504181.10  | 60S ribosomal protein L9, putative                        | 1,001  | 3,983E-42  |
| TcCLB.506739.170 | hypothetical protein, conserved                           | 1,001  | 1,584E-22  |
| TcCLB.510999.39  | 40S ribosomal protein S3A, putative (fragment)            | 1,001  | 6,378E-20  |
| TcCLB.506903.50  | dispersed gene family protein 1 (DGF-1, pseudogene), put  | 1      | 3,47E-10   |
| TcCLB.508707.310 | leucine rich repeat protein, putative                     | 0,9999 | 1,379E-29  |
| TcCLB.508479.216 | hypothetical protein, conserved                           | 0,9999 | 1,951E-18  |
| TcCLB.510285.20  | hypothetical protein, conserved                           | 0,9996 | 8,884E-25  |
| TcCLB.510117.10  | retrotransposon hot spot protein (RHS, pseudogene), puta  | 0,9996 | 4,949E-16  |
| TcCLB.508981.30  | hypothetical protein, conserved                           | 0,9995 | 7,577E-13  |
| TcCLB.509725.113 | ATP-dependent DEAD/H RNA helicase (pseudogene), puta      | 0,9992 | 0,00007478 |
| TcCLB.506585.40  | glucose-regulated protein 78, putative                    | 0,999  | 9,005E-38  |
| TcCLB.511663.19  | dispersed gene family protein 1 (DGF-1), putative (fragme | 0,999  | 1,148E-06  |
| TcCLB.506817.10  | hypothetical protein, conserved                           | 0,9987 | 1,559E-38  |
| TcCLB.510565.40  | hypothetical protein                                      | 0,9982 | 4,25E-14   |
| TcCLB.509157.90  | hypothetical protein, conserved                           | 0,9981 | 7,249E-41  |
| TcCLB.508041.50  | hypothetical protein, conserved                           | 0,9979 | 2,068E-27  |
| TcCLB.506529.410 | primase 2, putative                                       | 0,9978 | 6,768E-27  |
| TcCLB.511717.130 | hypothetical protein, conserved                           | 0,9975 | 1,659E-13  |
| TcCLB.509569.94  | hypothetical protein, conserved                           | 0,9975 | 2,235E-11  |
| TcCLB.508501.230 | monothiol glutaredoxin, putative                          | 0,997  | 1,776E-13  |
| TcCLB.506543.90  | cytochrome c oxidase assembly protein, putative           | 0,9969 | 2,448E-16  |
| TcCLB.510535.64  | hypothetical protein, conserved                           | 0,9966 | 1,176E-19  |
| TcCLB.503847.50  | hypothetical protein, conserved                           | 0,9959 | 2,2E-11    |
| TcCLB.508045.70  | hypothetical protein, conserved                           | 0,9958 | 3,245E-45  |
| TcCLB.509105.90  | MRB1-associated protein, putative (RGG2)                  | 0,9957 | 2,805E-13  |

|                  |                                                          |        |            |
|------------------|----------------------------------------------------------|--------|------------|
| TcCLB.506405.10  | phosphomannomutase-like protein, putative                | 0,9955 | 8,313E-29  |
| TcCLB.506181.50  | 60S ribosomal protein L18, putative                      | 0,9954 | 1,641E-38  |
| TcCLB.508479.110 | glutathionylspermidine synthase, putative                | 0,9954 | 1,523E-33  |
| TcCLB.504257.9   | RNA-binding protein 42 (RNA-binding motif protein 42), p | 0,9954 | 9,628E-14  |
| TcCLB.511395.80  | hypothetical protein                                     | 0,9952 | 3,851E-19  |
| TcCLB.503719.20  | 40S ribosomal protein SA, putative                       | 0,9951 | 7,229E-29  |
| TcCLB.509241.10  | surface protease GP63, putative (fragment)               | 0,9949 | 5,571E-06  |
| TcCLB.511727.145 | hypothetical protein                                     | 0,9944 | 4,497E-24  |
| TcCLB.506919.40  | retrotransposon hot spot protein (RHS, pseudogene), puta | 0,9943 | 0,0008883  |
| TcCLB.508331.30  | Checkpoint protein HUS1, putative                        | 0,9942 | 1,537E-12  |
| TcCLB.509659.20  | dispersed gene family protein 1 (DGF-1, pseudogene), put | 0,9942 | 0,00003196 |
| TcCLB.510759.150 | hypothetical protein, conserved                          | 0,9934 | 9,722E-28  |
| TcCLB.503751.10  | hypothetical protein                                     | 0,9932 | 5,43E-16   |
| TcCLB.510339.74  | mitochondrial carrier protein, putative                  | 0,9926 | 2,192E-20  |
| TcCLB.506755.110 | hypothetical protein, conserved                          | 0,9922 | 7,654E-29  |
| TcCLB.510857.30  | hypothetical protein, conserved                          | 0,992  | 1,126E-24  |
| TcCLB.504427.20  | hypothetical protein, conserved                          | 0,992  | 9,428E-12  |
| TcCLB.511183.140 | dispersed gene family protein 1 (DGF-1), putative        | 0,9917 | 0,000396   |
| TcCLB.511751.80  | hypothetical protein                                     | 0,9913 | 4,018E-16  |
| TcCLB.505193.110 | serine/threonine protein kinase, putative                | 0,9912 | 1,573E-31  |
| TcCLB.511545.40  | ribosomal protein L27, putative                          | 0,9912 | 8,423E-07  |
| TcCLB.507001.80  | acyl-CoA dehydrogenase, putative                         | 0,9907 | 1,904E-17  |
| TcCLB.510761.44  | cyclophilin-like protein, putative                       | 0,9906 | 1,225E-31  |
| TcCLB.510943.198 | hypothetical protein, conserved                          | 0,9902 | 2,885E-10  |
| TcCLB.510901.60  | replication factor A, 51kDa subunit, putative            | 0,9901 | 2,587E-20  |
| TcCLB.507255.30  | retrotransposon hot spot protein (RHS, pseudogene), puta | 0,9899 | 2,931E-14  |
| TcCLB.508249.10  | dispersed gene family protein 1 (DGF-1), putative        | 0,9899 | 2,776E-06  |
| TcCLB.509757.49  | L-ribulokinase, putative                                 | 0,9898 | 0,0002574  |
| TcCLB.511883.30  | dispersed gene family protein 1 (DGF-1, pseudogene), put | 0,9897 | 1,641E-08  |
| TcCLB.510187.439 | hypothetical protein                                     | 0,989  | 8,108E-34  |
| TcCLB.506357.120 | ethanolamine phosphotransferase, putative                | 0,989  | 5,103E-16  |
| TcCLB.508391.10  | dispersed gene family protein 1 (DGF-1), putative        | 0,9889 | 0,0004384  |
| TcCLB.506843.50  | glycine dehydrogenase [decarboxylating] (pseudogene), p  | 0,9887 | 0,0006415  |
| TcCLB.503487.30  | hypothetical protein, conserved                          | 0,9886 | 3,165E-15  |
| TcCLB.509759.19  | pumilio/PUF RNA binding protein 1, putative (PUF1)       | 0,9879 | 2,814E-29  |
| TcCLB.510091.50  | hypothetical protein, conserved                          | 0,9879 | 5,32E-19   |
| TcCLB.507623.129 | vacuolar type h ATPase subunit, putative                 | 0,9878 | 1,428E-14  |
| TcCLB.509779.10  | DNA repair protein, putative                             | 0,9876 | 3,251E-24  |
| TcCLB.511577.144 | hypothetical protein, conserved                          | 0,9875 | 5,092E-10  |
| TcCLB.507711.40  | RNA-binding protein, putative                            | 0,9873 | 3,887E-16  |
| TcCLB.510911.50  | glycine dehydrogenase [decarboxylating], putative        | 0,9873 | 0,0000104  |
| TcCLB.511303.150 | hypothetical protein, conserved                          | 0,9872 | 3,23E-14   |
| TcCLB.510087.80  | hypothetical protein, conserved                          | 0,9871 | 6,112E-26  |
| TcCLB.508619.10  | retrotransposon hot spot protein (RHS, pseudogene), puta | 0,987  | 3,547E-18  |
| TcCLB.511727.290 | RNA-binding protein, putative                            | 0,9869 | 4,803E-49  |

|                  |                                                           |        |           |
|------------------|-----------------------------------------------------------|--------|-----------|
| TcCLB.504147.120 | 60S ribosomal protein L22, putative                       | 0,9869 | 8,232E-46 |
| TcCLB.507125.30  | retrotransposon hot spot protein (RHS, pseudogene), puta  | 0,9868 | 0,0001027 |
| TcCLB.507245.20  | trans-sialidase (pseudogene), putative                    | 0,986  | 7,405E-10 |
| TcCLB.510437.20  | 60S ribosomal protein L14, putative                       | 0,9858 | 8,241E-34 |
| TcCLB.507229.29  | dispersed gene family protein 1 (DGF-1), putative         | 0,9855 | 0,004995  |
| TcCLB.503575.34  | ribosomal protein L38, putative                           | 0,9854 | 3,173E-24 |
| TcCLB.507079.20  | dynein heavy chain, cytosolic, putative                   | 0,9853 | 2,75E-17  |
| TcCLB.508821.50  | vacuolar type h ATPase subunit, putative                  | 0,984  | 5,038E-15 |
| TcCLB.506393.30  | beta galactofuranosyl glycosyltransferase, putative       | 0,9837 | 6,361E-09 |
| TcCLB.509331.189 | hypothetical protein, conserved                           | 0,983  | 1,116E-10 |
| TcCLB.508567.30  | hypothetical protein                                      | 0,983  | 1,122E-10 |
| TcCLB.445281.9   | calpain-like cysteine peptidase, putative                 | 0,9829 | 0,0001238 |
| TcCLB.509979.95  | 60S ribosomal protein L35, putative                       | 0,9828 | 1,807E-32 |
| TcCLB.511245.24  | hypothetical protein, conserved                           | 0,9827 | 4,46E-32  |
| TcCLB.504351.30  | hypothetical protein, conserved (pseudogene)              | 0,9827 | 2,002E-10 |
| TcCLB.509733.40  | hypothetical protein, conserved                           | 0,9822 | 4,757E-20 |
| TcCLB.507253.70  | N-acetyltransferase complex ARD1 subunit (pseudogene),    | 0,9817 | 0,02272   |
| TcCLB.507017.70  | ribosomal RNA adenine dimethylase family protein, putat   | 0,9815 | 3,284E-24 |
| TcCLB.508207.240 | C-1-tetrahydrofolate synthase, cytoplasmic, putative      | 0,9814 | 1,224E-16 |
| TcCLB.508851.59  | ATP synthase, putative                                    | 0,9814 | 7,024E-16 |
| TcCLB.507533.21  | clathrin assembly protein (pseudogene), putative          | 0,9811 | 7,745E-27 |
| TcCLB.511903.130 | 60S ribosomal protein L26, putative                       | 0,9805 | 2,626E-44 |
| TcCLB.506825.24  | hypothetical protein, conserved                           | 0,9804 | 2,167E-22 |
| TcCLB.509033.10  | trans-sialidase (pseudogene), putative                    | 0,9801 | 0,0002825 |
| TcCLB.506985.30  | proteasome alpha 3 subunit, putative                      | 0,9799 | 1,362E-20 |
| TcCLB.503667.39  | dispersed gene family protein 1 (DGF-1), putative (fragme | 0,9798 | 4,005E-06 |
| TcCLB.508041.40  | hypothetical protein                                      | 0,9792 | 1,345E-22 |
| TcCLB.507491.39  | hypothetical protein, conserved                           | 0,9788 | 2,72E-13  |
| TcCLB.511589.110 | hypothetical protein, conserved                           | 0,9787 | 1,541E-27 |
| TcCLB.511899.40  | 2-amino-3-ketobutyrate coenzyme A ligase, putative        | 0,9784 | 1,122E-21 |
| TcCLB.511249.10  | ADP/ATP mitochondrial carrier protein, putative           | 0,9782 | 1,349E-22 |
| TcCLB.511319.30  | hypothetical protein                                      | 0,9782 | 1,836E-12 |
| TcCLB.506205.20  | hypothetical protein                                      | 0,978  | 9,187E-23 |
| TcCLB.509109.30  | hypothetical protein, conserved                           | 0,9778 | 6,166E-10 |
| TcCLB.510095.80  | hypothetical protein                                      | 0,9777 | 0,001413  |
| TcCLB.508321.40  | hypothetical protein, conserved                           | 0,9774 | 1,177E-34 |
| TcCLB.507519.110 | 60S ribosomal protein L7, putative                        | 0,9773 | 3,092E-37 |
| TcCLB.510479.11  | retrotransposon hot spot (RHS) protein, putative (fragmer | 0,9773 | 9,859E-19 |
| TcCLB.508465.110 | acyl-CoA dehydrogenase, putative                          | 0,9772 | 1,349E-19 |
| TcCLB.507529.20  | hypothetical protein, conserved                           | 0,9771 | 7,894E-30 |
| TcCLB.508125.40  | hypothetical protein                                      | 0,9771 | 0,01129   |
| TcCLB.510355.230 | hypothetical protein, conserved                           | 0,9761 | 2,491E-13 |
| TcCLB.508539.30  | hypothetical protein, conserved                           | 0,9757 | 1,112E-11 |
| TcCLB.505965.50  | phosphonopyruvate decarboxylase, putative                 | 0,9755 | 3,129E-21 |
| TcCLB.510293.20  | cytosolic factor SEC14, putative                          | 0,9754 | 4,892E-13 |



|                  |                                                          |        |            |
|------------------|----------------------------------------------------------|--------|------------|
| TcCLB.508159.13  | trans-sialidase (pseudogene), putative                   | 0,9752 | 0,00007741 |
| TcCLB.506301.60  | hypothetical protein                                     | 0,975  | 6,041E-27  |
| TcCLB.509599.60  | hypothetical protein                                     | 0,9749 | 1,268E-13  |
| TcCLB.511773.60  | glycine dehydrogenase [decarboxylating] (pseudogene), p  | 0,9744 | 4,406E-28  |
| TcCLB.509615.40  | alpha-adaptin-like (pseudogene), putative                | 0,9744 | 1,028E-17  |
| TcCLB.504149.100 | hypothetical protein, conserved                          | 0,9742 | 5,778E-27  |
| TcCLB.510337.20  | calpain-like cysteine peptidase, putative                | 0,9741 | 2,753E-09  |
| TcCLB.510659.140 | hypothetical protein, conserved (pseudogene)             | 0,974  | 6,806E-27  |
| TcCLB.507081.50  | hypothetical protein, conserved                          | 0,9739 | 7,502E-20  |
| TcCLB.506583.30  | ubiquitin-like protein, putative                         | 0,9734 | 6,648E-32  |
| TcCLB.506577.54  | 60S ribosomal protein L6, putative                       | 0,9726 | 2,398E-24  |
| TcCLB.511541.30  | hypothetical protein, conserved                          | 0,9724 | 3,589E-11  |
| TcCLB.507645.50  | hypothetical protein, conserved                          | 0,9719 | 1,092E-15  |
| TcCLB.508799.260 | hypothetical protein, conserved                          | 0,9717 | 1,142E-28  |
| TcCLB.511469.40  | hypothetical protein, conserved                          | 0,9717 | 5,621E-26  |
| TcCLB.504431.118 | hypothetical protein, conserved                          | 0,9717 | 8,554E-16  |
| TcCLB.508197.39  | 60S ribosomal protein L11, putative                      | 0,9715 | 5,184E-16  |
| TcCLB.509849.10  | ammonium transporter, putative                           | 0,9713 | 1,137E-17  |
| TcCLB.506817.30  | ribosomal protein L27, putative                          | 0,971  | 3,102E-25  |
| TcCLB.508207.90  | hypothetical protein, conserved                          | 0,971  | 1,002E-16  |
| TcCLB.418185.40  | hypothetical protein, conserved (pseudogene)             | 0,9706 | 1,874E-15  |
| TcCLB.504109.160 | electron transfer flavoprotein, putative                 | 0,9703 | 1,25E-28   |
| TcCLB.509247.50  | methionyl-tRNA synthetase, putative                      | 0,9702 | 2,739E-35  |
| TcCLB.507521.130 | hypothetical protein                                     | 0,9702 | 8,018E-29  |
| TcCLB.511133.30  | hypothetical protein, conserved                          | 0,9699 | 9,935E-26  |
| TcCLB.510155.100 | hypothetical protein                                     | 0,9697 | 7,568E-26  |
| TcCLB.503447.60  | beta galactofuranosyl glycosyltransferase, putative      | 0,9692 | 0,01157    |
| TcCLB.510761.14  | 60S ribosomal protein L26, putative                      | 0,969  | 6,095E-31  |
| TcCLB.506289.9   | DNA ligase, putative (fragment)                          | 0,9687 | 8,031E-14  |
| TcCLB.510611.60  | nitroreductase                                           | 0,968  | 3,034E-18  |
| TcCLB.503809.120 | hypothetical protein, conserved                          | 0,968  | 6,645E-09  |
| TcCLB.509683.117 | 40S ribosomal protein S4, putative                       | 0,9678 | 8,378E-53  |
| TcCLB.504269.10  | protein kinase (pseudogene), putative                    | 0,9676 | 4,451E-19  |
| TcCLB.506343.30  | retrotransposon hot spot protein (RHS, pseudogene), puta | 0,9673 | 1,379E-23  |
| TcCLB.506301.30  | hypothetical protein, conserved                          | 0,967  | 3,814E-29  |
| TcCLB.511647.10  | hypothetical protein, conserved                          | 0,967  | 8,14E-26   |
| TcCLB.470827.10  | retrotransposon hot spot protein (RHS, pseudogene), puta | 0,9668 | 1,13E-10   |
| TcCLB.509949.9   | dispersed gene family protein 1 (DGF-1), putative        | 0,9668 | 0,00002661 |
| TcCLB.510719.160 | 60S ribosomal protein L22, putative                      | 0,9667 | 4,085E-39  |
| TcCLB.507019.83  | 40S ribosomal protein S30, putative                      | 0,9666 | 1,26E-26   |
| TcCLB.510945.50  | hypothetical protein, conserved                          | 0,9662 | 2,61E-30   |
| TcCLB.467287.30  | ATPase beta subunit, putative                            | 0,9662 | 1,517E-25  |
| TcCLB.510659.210 | chaperone DNAJ protein, putative                         | 0,9662 | 1,666E-25  |
| TcCLB.511385.60  | hypothetical protein                                     | 0,9659 | 1,545E-11  |
| TcCLB.506435.160 | hypothetical protein, conserved                          | 0,9657 | 1,291E-25  |

|                  |                                                                  |        |            |
|------------------|------------------------------------------------------------------|--------|------------|
| TcCLB.507585.20  | hypothetical protein, conserved                                  | 0,9657 | 2,692E-17  |
| TcCLB.507509.80  | hypothetical protein, conserved                                  | 0,9654 | 7,259E-24  |
| TcCLB.506883.9   | isopentenyl-diphosphate delta-isomerase (type II), putative      | 0,9654 | 1,908E-11  |
| TcCLB.506345.100 | beta galactofuranosyl glycosyltransferase (pseudogene), putative | 0,9653 | 2,849E-12  |
| TcCLB.509007.30  | hypothetical protein, conserved                                  | 0,9652 | 1,054E-12  |
| TcCLB.510005.30  | retrotransposon hot spot protein (RHS, pseudogene), putative     | 0,9652 | 3,037E-09  |
| TcCLB.506503.53  | hypothetical protein                                             | 0,9648 | 2,566E-13  |
| TcCLB.507711.50  | hypothetical protein, conserved                                  | 0,9641 | 2,452E-10  |
| TcCLB.508163.360 | dispersed gene family protein 1 (DGF-1), putative                | 0,9638 | 0,00001225 |
| TcCLB.511483.20  | hypothetical protein, conserved                                  | 0,9637 | 1,435E-15  |
| TcCLB.508851.160 | hypothetical protein, conserved                                  | 0,9632 | 2,074E-27  |
| TcCLB.506417.50  | hypothetical protein, conserved                                  | 0,9632 | 1,457E-11  |
| TcCLB.506513.190 | NADH-ubiquinone oxidoreductase, mitochondrial, putative          | 0,9624 | 2,048E-16  |
| TcCLB.509001.30  | hypothetical protein, conserved                                  | 0,9624 | 7,845E-14  |
| TcCLB.507963.79  | nucleosome assembly protein, putative                            | 0,9623 | 7,936E-30  |
| TcCLB.507819.30  | trans-sialidase, Group II, putative                              | 0,962  | 5,074E-13  |
| TcCLB.504769.80  | hypothetical protein, conserved                                  | 0,9616 | 1,511E-22  |
| TcCLB.511585.110 | hypothetical protein                                             | 0,9615 | 1,197E-23  |
| TcCLB.511599.40  | dispersed gene family protein 1 (DGF-1), putative                | 0,96   | 6,758E-08  |
| TcCLB.508897.50  | hypothetical protein, conserved                                  | 0,9599 | 3,898E-21  |
| TcCLB.508463.20  | hypothetical protein, conserved                                  | 0,9598 | 5,406E-36  |
| TcCLB.505607.9   | dispersed gene family protein 1 (DGF-1), putative                | 0,9598 | 0,00005052 |
| TcCLB.511893.10  | ribonuclease inhibitor, putative                                 | 0,9597 | 6,415E-27  |
| TcCLB.508631.20  | retrotransposon hot spot protein (RHS, pseudogene), putative     | 0,9595 | 7,106E-29  |
| TcCLB.485683.10  | RNA-binding protein 42 (RNA-binding motif protein 42), putative  | 0,9595 | 8,135E-22  |
| TcCLB.503445.20  | trans-sialidase (pseudogene), putative                           | 0,9592 | 2,17E-15   |
| TcCLB.511613.151 | syntaxin binding protein (pseudogene), putative                  | 0,9592 | 0,03086    |
| TcCLB.506679.100 | 40S ribosomal protein S18, putative                              | 0,9583 | 1,293E-36  |
| TcCLB.511355.14  | cation transporter, putative                                     | 0,9582 | 1,976E-19  |
| TcCLB.510359.330 | hypothetical protein, conserved                                  | 0,9581 | 9,307E-19  |
| TcCLB.508153.540 | hypothetical protein, conserved                                  | 0,9577 | 1,023E-26  |
| TcCLB.508815.160 | ER lumen retaining receptor protein, putative                    | 0,9577 | 2,052E-21  |
| TcCLB.506791.50  | Present in the outer mitochondrial membrane proteome             | 0,957  | 1,255E-14  |
| TcCLB.509967.140 | hypothetical protein, conserved                                  | 0,957  | 1,706E-13  |
| TcCLB.509419.260 | dispersed gene family protein 1 (DGF-1), putative                | 0,957  | 0,002869   |
| TcCLB.508911.50  | fructosamine kinase, putative                                    | 0,9569 | 3,644E-10  |
| TcCLB.508357.90  | T-complex protein 1, beta subunit, putative                      | 0,9568 | 4,917E-38  |
| TcCLB.506733.130 | hypothetical protein, conserved                                  | 0,9563 | 1,291E-19  |
| TcCLB.510943.26  | ribosomal protein L38, putative                                  | 0,9563 | 2,684E-15  |
| TcCLB.506989.110 | NADH-ubiquinone oxidoreductase complex I subunit, putative       | 0,955  | 3,148E-17  |
| TcCLB.503823.160 | ubiquinone biosynthesis methyltransferase, putative              | 0,955  | 1,337E-16  |
| TcCLB.510383.9   | dispersed gene family protein 1 (DGF-1), putative                | 0,955  | 0,00001311 |
| TcCLB.503557.14  | hypothetical protein, conserved                                  | 0,9548 | 1,344E-16  |
| TcCLB.506203.120 | hypothetical protein, conserved                                  | 0,9547 | 1,203E-34  |
| TcCLB.509259.180 | retrotransposon hot spot (RHS) protein, putative                 | 0,9546 | 1,115E-17  |

|                  |                                                                          |        |            |
|------------------|--------------------------------------------------------------------------|--------|------------|
| TcCLB.503833.40  | 40S ribosomal protein S2, putative                                       | 0,9545 | 8,69E-26   |
| TcCLB.506945.290 | ribosomal protein L15, putative                                          | 0,9544 | 5,87E-28   |
| TcCLB.507007.99  | mitochondrial carrier protein (pseudogene), putative                     | 0,9544 | 1,744E-13  |
| TcCLB.506773.40  | 3-methylcrotonoyl-CoA carboxylase beta subunit, putative                 | 0,9543 | 1,102E-36  |
| TcCLB.504797.14  | hypothetical protein, conserved                                          | 0,9542 | 1,372E-11  |
| TcCLB.511665.110 | glycine dehydrogenase [decarboxylating] (pseudogene), putative           | 0,9541 | 9,306E-07  |
| TcCLB.511867.20  | hypothetical protein, conserved                                          | 0,954  | 2,083E-09  |
| TcCLB.511019.40  | retrotransposon hot spot protein (RHS, pseudogene), putative             | 0,9538 | 6,623E-42  |
| TcCLB.510729.80  | Mitochondrial import receptor subunit ATOM40, putative                   | 0,9538 | 1,495E-31  |
| TcCLB.507887.10  | dihydroorotase (pseudogene), putative                                    | 0,9538 | 0,00003922 |
| TcCLB.506399.89  | Succinate dehydrogenase [ubiquinone] flavoprotein subunit                | 0,9536 | 8,635E-15  |
| TcCLB.508169.90  | eukaryotic translation initiation factor 3 subunit L, putative           | 0,953  | 1,388E-36  |
| TcCLB.511523.30  | hypothetical protein                                                     | 0,9528 | 5,486E-18  |
| TcCLB.506715.30  | hypothetical protein                                                     | 0,9525 | 6,23E-17   |
| TcCLB.507089.260 | CYC2-like cyclin, putative                                               | 0,9523 | 2,596E-16  |
| TcCLB.509695.180 | 40S ribosomal protein S23, putative                                      | 0,9516 | 1,272E-34  |
| TcCLB.509027.70  | kinetoplastid kinetochore protein 19, putative (kkt19)                   | 0,9516 | 3,297E-17  |
| TcCLB.509701.10  | trifunctional enzyme alpha subunit, mitochondrial precursor              | 0,9513 | 2,541E-23  |
| TcCLB.507503.70  | retrotransposon hot spot protein (RHS, pseudogene), putative             | 0,9513 | 3,404E-11  |
| TcCLB.509123.30  | mitochondrial RNA binding protein 1                                      | 0,9512 | 1,32E-13   |
| TcCLB.509719.23  | hypothetical protein, conserved                                          | 0,9509 | 5,622E-10  |
| TcCLB.442383.9   | 40S ribosomal protein SA, putative                                       | 0,9504 | 8,14E-29   |
| TcCLB.505183.60  | hypothetical protein, conserved                                          | 0,9504 | 1,594E-22  |
| TcCLB.506705.50  | hypothetical protein                                                     | 0,9503 | 2,282E-22  |
| TcCLB.506679.94  | 40S ribosomal protein S18, putative                                      | 0,9502 | 1,049E-33  |
| TcCLB.510761.18  | hypothetical protein, conserved                                          | 0,9499 | 7,693E-19  |
| TcCLB.510431.40  | metallo-peptidase, Clan M- Family M48 (FACE1)                            | 0,9497 | 1,066E-16  |
| TcCLB.509067.40  | NADH dehydrogenase subunit N18M, putative                                | 0,9494 | 9,612E-13  |
| TcCLB.510535.50  | hypothetical protein                                                     | 0,9491 | 5,956E-09  |
| TcCLB.409117.20  | 40S ribosomal protein S14, putative                                      | 0,949  | 3,552E-31  |
| TcCLB.508661.34  | hypothetical protein, conserved                                          | 0,9489 | 9,304E-18  |
| TcCLB.506981.10  | dispersed gene family protein 1 (DGF-1), putative (fragment)             | 0,9487 | 0,001721   |
| TcCLB.503595.10  | hypothetical protein, conserved                                          | 0,9485 | 2,268E-25  |
| TcCLB.506559.420 | dolichyl-P-Man:GDP-Man1GlcNAc2-PP-dolichyl alpha-1,3-glucosyltransferase | 0,9482 | 4,476E-40  |
| TcCLB.508413.44  | 60S ribosomal protein L12, putative                                      | 0,9482 | 6,34E-36   |
| TcCLB.509233.190 | ribosomal protein S25, putative                                          | 0,9481 | 3,018E-35  |
| TcCLB.509295.5   | retrotransposon hot spot protein (RHS, pseudogene), putative             | 0,948  | 1,066E-20  |
| TcCLB.511813.20  | ubiquitin-conjugating enzyme E2, putative                                | 0,9477 | 1,055E-25  |
| TcCLB.504213.80  | threonine synthase, putative                                             | 0,9476 | 5,218E-23  |
| TcCLB.503415.30  | hypothetical protein, conserved                                          | 0,9475 | 7,849E-24  |
| TcCLB.507603.80  | hypothetical protein, conserved                                          | 0,9461 | 5,936E-16  |
| TcCLB.509561.130 | hypothetical protein, conserved                                          | 0,9458 | 2,91E-18   |
| TcCLB.508461.490 | 60S ribosomal protein L23, putative                                      | 0,9453 | 6,594E-43  |
| TcCLB.511253.31  | kinesin-like protein, putative (fragment)                                | 0,9452 | 0,01156    |
| TcCLB.399033.19  | mitochondrial RNA binding protein 1                                      | 0,9451 | 2,895E-21  |

|                  |                                                               |        |            |
|------------------|---------------------------------------------------------------|--------|------------|
| TcCLB.506177.30  | hypothetical protein, conserved                               | 0,9451 | 8,371E-14  |
| TcCLB.508387.80  | hypothetical protein, conserved                               | 0,9446 | 3,301E-19  |
| TcCLB.510101.34  | hypothetical protein, conserved                               | 0,944  | 1,66E-17   |
| TcCLB.509747.80  | hypothetical protein, conserved                               | 0,9436 | 6,451E-11  |
| TcCLB.511883.49  | hypothetical protein, conserved (fragment)                    | 0,9426 | 1,936E-12  |
| TcCLB.508153.184 | 60S ribosomal protein L39, putative                           | 0,9425 | 2,874E-21  |
| TcCLB.511239.49  | adenosine 5'-monophosphoramidase, putative                    | 0,9425 | 1,082E-10  |
| TcCLB.507057.4   | myosin heavy chain, putative (fragment)                       | 0,9424 | 8,054E-10  |
| TcCLB.504029.60  | hypothetical protein, conserved                               | 0,9423 | 7,296E-18  |
| TcCLB.508179.70  | GPR1/FUN34/yaaH family, putative                              | 0,9411 | 2,4E-13    |
| TcCLB.503511.10  | hypothetical protein, conserved                               | 0,9411 | 8,675E-12  |
| TcCLB.511807.256 | hypothetical protein, conserved                               | 0,941  | 8,217E-14  |
| TcCLB.511305.40  | hypothetical protein, conserved                               | 0,9404 | 1,715E-09  |
| TcCLB.511309.7   | hypothetical protein                                          | 0,9404 | 1,846E-07  |
| TcCLB.509599.150 | serine/threonine protein kinase, putative                     | 0,9399 | 3,147E-13  |
| TcCLB.509923.9   | dispersed gene family protein 1 (DGF-1), putative (fragment)  | 0,9392 | 0,0000123  |
| TcCLB.506885.14  | ribosomal protein L37, putative                               | 0,938  | 5,935E-20  |
| TcCLB.511653.40  | hypothetical protein, conserved                               | 0,9377 | 1,519E-11  |
| TcCLB.511771.120 | hypothetical protein, conserved (pseudogene)                  | 0,9377 | 1,642E-10  |
| TcCLB.509213.170 | transcription activator, putative                             | 0,9376 | 1,018E-28  |
| TcCLB.511209.10  | V-type proton ATPase subunit B, putative                      | 0,9376 | 1,069E-25  |
| TcCLB.510963.90  | elongation factor 2, putative                                 | 0,9374 | 3,979E-36  |
| TcCLB.506683.30  | hypothetical protein, conserved                               | 0,9374 | 0,00001497 |
| TcCLB.508737.60  | hypothetical protein, conserved                               | 0,9372 | 2,306E-12  |
| TcCLB.506775.80  | 14-3-3 protein 2, putative (14-3-3-II)                        | 0,9371 | 5,22E-41   |
| TcCLB.509815.120 | dispersed gene family protein 1 (DGF-1, pseudogene), putative | 0,9371 | 7,296E-08  |
| TcCLB.509027.60  | kinetoplastid kinetochore protein 10, putative (kkt10)        | 0,9367 | 7,969E-11  |
| TcCLB.510227.29  | thioredoxin, putative (fragment)                              | 0,9366 | 4,148E-30  |
| TcCLB.418069.10  | heat shock protein 70 (hsp70), putative (fragment)            | 0,9366 | 1,025E-17  |
| TcCLB.504079.3   | mitochondrial chaperone BCS1, putative (fragment)             | 0,9366 | 2,779E-14  |
| TcCLB.504069.50  | peroxin 14, putative                                          | 0,9363 | 3,573E-26  |
| TcCLB.509213.140 | mitochondrial RNA binding complex 1 subunit, putative         | 0,9359 | 3,973E-28  |
| TcCLB.510395.30  | GTPase, putative                                              | 0,9359 | 1,497E-10  |
| TcCLB.510893.9   | dispersed gene family protein 1 (DGF-1, pseudogene), putative | 0,9359 | 0,0002686  |
| TcCLB.510755.129 | 60S ribosomal protein L12, putative                           | 0,9358 | 1,584E-09  |
| TcCLB.509509.50  | hypothetical protein, conserved                               | 0,9355 | 2,221E-13  |
| TcCLB.509317.10  | hypothetical protein, conserved                               | 0,9353 | 1,156E-18  |
| TcCLB.510719.260 | ATP-dependent protease subunit HslV, putative (HslV)          | 0,9353 | 4,166E-17  |
| TcCLB.509109.150 | hypothetical protein, conserved                               | 0,9353 | 6,33E-10   |
| TcCLB.504009.70  | succinate dehydrogenase cytochrome B subunit                  | 0,9352 | 1,641E-18  |
| TcCLB.509437.170 | hypothetical protein                                          | 0,9349 | 1,444E-06  |
| TcCLB.506825.170 | lanosterol synthase, putative                                 | 0,9348 | 1,193E-20  |
| TcCLB.504769.70  | hypothetical protein, conserved                               | 0,9345 | 3,884E-30  |
| TcCLB.507671.10  | hypothetical protein                                          | 0,9343 | 2,321E-09  |
| TcCLB.508031.10  | dispersed gene family protein 1 (DGF-1, pseudogene), putative | 0,9343 | 0,0001723  |

|                  |                                                           |        |            |
|------------------|-----------------------------------------------------------|--------|------------|
| TcCLB.506773.130 | pumilio-repeat, RNA-binding protein, putative             | 0,934  | 3,096E-32  |
| TcCLB.509889.9   | dispersed gene family protein 1 (DGF-1), putative         | 0,934  | 0,0001215  |
| TcCLB.506817.50  | ribosomal protein L27, putative                           | 0,9337 | 8,8E-27    |
| TcCLB.506503.69  | glycosomal malate dehydrogenase, putative                 | 0,9336 | 3,675E-29  |
| TcCLB.511415.30  | retrotransposon hot spot protein (RHS, pseudogene), puta  | 0,9336 | 7,484E-16  |
| TcCLB.508463.29  | hypothetical protein, conserved                           | 0,9336 | 3,288E-14  |
| TcCLB.508981.39  | trifunctional enzyme alpha subunit, mitochondrial precurs | 0,9335 | 1,794E-17  |
| TcCLB.511255.299 | mucin TcMUCII, putative                                   | 0,9334 | 0,006819   |
| TcCLB.510985.20  | retrotransposon hot spot protein (RHS, pseudogene), puta  | 0,9333 | 1,019E-21  |
| TcCLB.511261.140 | 60S ribosomal protein L34, putative                       | 0,9329 | 3,513E-31  |
| TcCLB.509109.120 | protein tyrosine phosphatase, putative                    | 0,9328 | 3,769E-15  |
| TcCLB.503709.20  | 60S ribosomal protein L44, putative (fragment)            | 0,9327 | 5,071E-29  |
| TcCLB.506975.30  | amidohydrolase, putative                                  | 0,9326 | 7,381E-16  |
| TcCLB.507093.80  | hypothetical protein, conserved                           | 0,9322 | 3,107E-13  |
| TcCLB.508823.120 | ribosomal protein S20, putative                           | 0,9321 | 5,053E-18  |
| TcCLB.507723.30  | retrotransposon hot spot protein (RHS, pseudogene), puta  | 0,9319 | 2,645E-14  |
| TcCLB.505035.5   | hypothetical protein, conserved                           | 0,9319 | 4,058E-06  |
| TcCLB.511529.160 | enoyl-CoA hydratase/isomerase family protein, putative    | 0,9316 | 3,295E-18  |
| TcCLB.503909.120 | cyclosome subunit, putative                               | 0,9315 | 1,121E-07  |
| TcCLB.510899.19  | hypothetical protein, conserved                           | 0,9311 | 8,264E-08  |
| TcCLB.511367.340 | mitochondrial processing peptidase alpha subunit, putativ | 0,931  | 4,194E-32  |
| TcCLB.506925.120 | eukaryotic initiation factor 5a, putative                 | 0,9308 | 1,98E-16   |
| TcCLB.511653.30  | hypothetical protein, conserved                           | 0,9304 | 3,673E-19  |
| TcCLB.507037.80  | hypothetical protein, conserved                           | 0,9302 | 3,355E-15  |
| TcCLB.511815.150 | hypothetical protein                                      | 0,9299 | 4,316E-33  |
| TcCLB.510575.220 | hypothetical protein, conserved                           | 0,9298 | 6E-15      |
| TcCLB.510301.50  | hypothetical protein, conserved                           | 0,9297 | 3,209E-09  |
| TcCLB.511183.460 | dispersed gene family protein 1 (DGF-1), putative         | 0,9296 | 0,00002025 |
| TcCLB.506919.120 | retrotransposon hot spot protein (RHS, pseudogene), puta  | 0,9289 | 3,333E-06  |
| TcCLB.431357.10  | 3,2-trans-enoyl-CoA isomerase, mitochondrial precursor, i | 0,9285 | 4,046E-07  |
| TcCLB.508093.29  | hypothetical protein, conserved (pseudogene)              | 0,9285 | 0,002019   |
| TcCLB.511823.70  | farnesyl pyrophosphate synthase                           | 0,9284 | 1,21E-19   |
| TcCLB.507773.60  | phosphoribosylpyrophosphate synthetase, putative          | 0,9282 | 8,628E-22  |
| TcCLB.507653.10  | hypothetical protein, conserved                           | 0,9281 | 5,068E-09  |
| TcCLB.506241.170 | 40S ribosomal protein S6, putative                        | 0,9279 | 2,431E-31  |
| TcCLB.509865.9   | retrotransposon hot spot (RHS) protein, putative          | 0,9279 | 5,413E-18  |
| TcCLB.507023.40  | protein kinase, putative                                  | 0,9278 | 4,409E-27  |
| TcCLB.503943.10  | serine/threonine protein kinase, putative (fragment)      | 0,9277 | 1,855E-26  |
| TcCLB.509641.70  | hypothetical protein, conserved                           | 0,9274 | 1,186E-27  |
| TcCLB.508241.100 | hypothetical protein                                      | 0,9273 | 1,104E-29  |
| TcCLB.509021.9   | dispersed gene family protein 1 (DGF-1), putative         | 0,9271 | 0,0545     |
| TcCLB.507589.30  | Checkpoint protein HUS1, putative                         | 0,9269 | 6,059E-23  |
| TcCLB.508823.140 | ribosomal protein S20, putative                           | 0,9263 | 7,093E-24  |
| TcCLB.506375.60  | tryptophanyl-tRNA synthetase, putative                    | 0,9263 | 1,128E-10  |
| TcCLB.509331.20  | hypothetical protein, conserved                           | 0,926  | 2,219E-15  |

|                  |                                                             |        |            |
|------------------|-------------------------------------------------------------|--------|------------|
| TcCLB.507625.140 | membrane transporter protein, putative                      | 0,9256 | 4,585E-20  |
| TcCLB.508587.10  | retrotransposon hot spot protein (RHS, pseudogene), puta    | 0,9256 | 3,732E-13  |
| TcCLB.503529.20  | hypothetical protein, conserved                             | 0,9252 | 8,01E-17   |
| TcCLB.511903.110 | 40S ribosomal protein S8, putative                          | 0,925  | 1,428E-32  |
| TcCLB.508881.120 | prefoldin, putative                                         | 0,925  | 1,203E-21  |
| TcCLB.509165.40  | 60S acidic ribosomal protein P2 beta (H6.4), putative (P2-l | 0,9247 | 3,743E-32  |
| TcCLB.510911.10  | profilin, putative                                          | 0,9243 | 1,145E-13  |
| TcCLB.504097.30  | hypothetical protein, conserved                             | 0,9241 | 8,996E-29  |
| TcCLB.506297.230 | hypothetical protein, conserved                             | 0,9234 | 7,848E-14  |
| TcCLB.460747.9   | hypothetical protein, conserved (fragment)                  | 0,923  | 1,004E-19  |
| TcCLB.504229.110 | amino acid permease 24, putative (AAP24)                    | 0,923  | 4,337E-10  |
| TcCLB.510659.270 | hypothetical protein, conserved                             | 0,9226 | 5,745E-14  |
| TcCLB.506855.20  | hypothetical protein, conserved                             | 0,922  | 2,786E-15  |
| TcCLB.509905.100 | retrotransposon hot spot protein (RHS, pseudogene), puta    | 0,9215 | 2,083E-15  |
| TcCLB.510005.50  | dispersed gene family protein 1 (DGF-1), putative           | 0,9214 | 0,00000479 |
| TcCLB.510001.20  | hypothetical protein, conserved                             | 0,9212 | 1,923E-20  |
| TcCLB.507875.90  | dispersed gene family protein 1 (DGF-1, pseudogene), put    | 0,9212 | 2,651E-09  |
| TcCLB.509429.210 | leucine-rich repeat protein (LRRP), putative                | 0,921  | 1,403E-26  |
| TcCLB.508173.20  | retrotransposon hot spot protein (RHS, pseudogene), puta    | 0,9209 | 2,771E-44  |
| TcCLB.508807.10  | ATP-dependent Clp protease subunit, heat shock protein 1    | 0,9205 | 5,89E-19   |
| TcCLB.506511.20  | hypothetical protein, conserved                             | 0,9205 | 3,801E-16  |
| TcCLB.507951.160 | succinate dehydrogenase flavoprotein subunit                | 0,9203 | 2,916E-37  |
| TcCLB.509937.39  | hypothetical protein, conserved                             | 0,9201 | 4,625E-11  |
| TcCLB.511773.110 | retrotransposon hot spot (RHS) protein, putative            | 0,9197 | 2,34E-25   |
| TcCLB.511621.50  | RNA-binding protein, putative                               | 0,9196 | 2,352E-26  |
| TcCLB.511135.40  | hypothetical protein, conserved                             | 0,9196 | 6,598E-11  |
| TcCLB.504003.60  | chaperonin/T-complex protein 1 gamma subunit, putative      | 0,9195 | 6,777E-40  |
| TcCLB.506357.100 | DNA-directed RNA polymerase I subunit RPB5z, putative (     | 0,9189 | 1,057E-11  |
| TcCLB.504507.5   | trypanothione reductase, putative (fragment)                | 0,9185 | 4,136E-12  |
| TcCLB.510551.10  | dispersed gene family protein 1 (DGF-1, pseudogene), put    | 0,9184 | 0,0007267  |
| TcCLB.511621.220 | esterase, putative                                          | 0,9183 | 3,412E-06  |
| TcCLB.507251.20  | ribosomal protein L21E (60S), putative                      | 0,9182 | 1,167E-47  |
| TcCLB.510101.10  | protein transport protein Sec31, putative (pseudogene)      | 0,9182 | 3,3E-12    |
| TcCLB.511647.20  | hypothetical protein, conserved                             | 0,9181 | 6,849E-11  |
| TcCLB.511913.9   | ribonuclease L inhibitor (pseudogene), putative             | 0,9178 | 4,498E-19  |
| TcCLB.506885.340 | Mitochondrial import receptor subunit ATOM40, putative      | 0,9177 | 5,828E-28  |
| TcCLB.505989.90  | hypothetical protein, conserved                             | 0,9175 | 9,497E-20  |
| TcCLB.511763.10  | hypothetical protein, conserved                             | 0,9173 | 3,177E-08  |
| TcCLB.416041.24  | retrotransposon hot spot protein (RHS, pseudogene), puta    | 0,9172 | 3,349E-09  |
| TcCLB.507595.10  | dispersed gene family protein 1 (DGF-1, pseudogene), put    | 0,917  | 0,005596   |
| TcCLB.505647.50  | hypothetical protein, conserved                             | 0,9167 | 3,387E-07  |
| TcCLB.506359.30  | hypothetical protein, conserved (pseudogene)                | 0,9164 | 1,556E-15  |
| TcCLB.508647.270 | malic enzyme, putative                                      | 0,9163 | 3,546E-30  |
| TcCLB.506941.40  | hypothetical protein, conserved                             | 0,9163 | 4,079E-16  |
| TcCLB.509643.70  | Archaic translocase of outer membrane 11 kDa subunit, pi    | 0,9162 | 3,414E-16  |

|                  |                                                                |        |           |
|------------------|----------------------------------------------------------------|--------|-----------|
| TcCLB.511771.70  | dispersed gene family protein 1 (DGF-1), putative              | 0,9161 | 8,451E-09 |
| TcCLB.511885.10  | hypothetical protein, conserved (pseudogene)                   | 0,9155 | 2,271E-23 |
| TcCLB.506581.30  | eukaryotic translation initiation factor 3 subunit L, putative | 0,915  | 1,774E-29 |
| TcCLB.509725.60  | glycine dehydrogenase [decarboxylating] (pseudogene), putative | 0,915  | 1,7E-14   |
| TcCLB.509049.30  | hypothetical protein, conserved                                | 0,9146 | 3,093E-25 |
| TcCLB.507925.60  | calcium-binding protein, putative                              | 0,9144 | 8,058E-11 |
| TcCLB.506413.30  | 40S ribosomal protein S33, putative                            | 0,9144 | 2,523E-08 |
| TcCLB.511445.10  | calpain-like cysteine peptidase, putative                      | 0,9141 | 1,693E-06 |
| TcCLB.511287.40  | 40S ribosomal protein S2, putative                             | 0,9138 | 6,009E-41 |
| TcCLB.509029.80  | hypothetical protein                                           | 0,9138 | 1,468E-10 |
| TcCLB.504155.221 | surface protease GP63 (pseudogene), putative                   | 0,9137 | 0,1883    |
| TcCLB.506633.74  | hypothetical protein, conserved (pseudogene)                   | 0,9135 | 4,465E-12 |
| TcCLB.506657.40  | ADP/ATP translocase, putative                                  | 0,9134 | 1,576E-22 |
| TcCLB.505229.5   | hypothetical protein, conserved (fragment)                     | 0,9134 | 3,881E-12 |
| TcCLB.511361.50  | hypothetical protein, conserved                                | 0,9134 | 2,404E-08 |
| TcCLB.511817.100 | hypothetical protein, conserved                                | 0,9133 | 4,698E-25 |
| TcCLB.506657.79  | 50S ribosomal protein L16, putative                            | 0,9131 | 1,819E-13 |
| TcCLB.510359.310 | eukaryotic translation initiation factor 2 subunit, putative   | 0,913  | 6,581E-23 |
| TcCLB.508173.60  | cis-prenyltransferase, putative                                | 0,913  | 2,309E-13 |
| TcCLB.511131.40  | hypothetical protein                                           | 0,913  | 2,907E-10 |
| TcCLB.507709.50  | 60S ribosomal protein L6, putative                             | 0,9128 | 1,46E-28  |
| TcCLB.511847.80  | hypothetical protein, conserved                                | 0,9127 | 2,765E-17 |
| TcCLB.511825.80  | I/6 autoantigen, putative                                      | 0,9127 | 3,645E-14 |
| TcCLB.508163.70  | dispersed gene family protein 1 (DGF-1), putative              | 0,9127 | 0,000508  |
| TcCLB.509201.15  | ribosomal protein S29, putative                                | 0,9124 | 1,033E-13 |
| TcCLB.510485.9   | dispersed gene family protein 1 (DGF-1), putative              | 0,9123 | 0,0007276 |
| TcCLB.504255.20  | hypothetical protein                                           | 0,9118 | 7,28E-23  |
| TcCLB.510349.20  | hypothetical protein, conserved                                | 0,9111 | 1,429E-13 |
| TcCLB.510095.5   | retrotransposon hot spot protein (RHS, pseudogene), putative   | 0,911  | 0,01517   |
| TcCLB.509589.10  | mitochondrial DNA polymerase I protein D, putative             | 0,9109 | 2,717E-14 |
| TcCLB.510499.10  | dispersed gene family protein 1 (DGF-1), putative              | 0,9109 | 0,008987  |
| TcCLB.509453.79  | hypothetical protein, conserved                                | 0,9106 | 6,501E-27 |
| TcCLB.506275.121 | hypothetical protein                                           | 0,9105 | 0,09897   |
| TcCLB.509601.120 | hypothetical protein, conserved                                | 0,9104 | 1,543E-26 |
| TcCLB.506475.100 | conserved protein, unknown function                            | 0,9104 | 2,739E-15 |
| TcCLB.505193.84  | hypothetical protein, conserved                                | 0,9104 | 4,061E-12 |
| TcCLB.510359.180 | hypothetical protein, conserved                                | 0,9104 | 9,896E-11 |
| TcCLB.464879.9   | ribonuclease L inhibitor, putative (fragment)                  | 0,9099 | 8,392E-10 |
| TcCLB.511751.210 | phosphopantothencycysteine decarboxylase, putative (PP)        | 0,9098 | 1,136E-18 |
| TcCLB.507715.34  | hypothetical protein, conserved                                | 0,9095 | 7,708E-22 |
| TcCLB.508377.9   | fucose kinase, putative (fragment)                             | 0,9094 | 1,034E-20 |
| TcCLB.510123.10  | hypothetical protein, conserved                                | 0,9092 | 2,679E-16 |
| TcCLB.509023.60  | hypothetical protein, conserved                                | 0,909  | 1,967E-17 |
| TcCLB.509695.20  | hypothetical protein, conserved                                | 0,9086 | 3,351E-12 |
| TcCLB.506393.90  | dispersed gene family protein 1 (DGF-1), putative              | 0,9086 | 1,438E-09 |

|                  |                                                           |        |            |
|------------------|-----------------------------------------------------------|--------|------------|
| TcCLB.509127.50  | mitochondrial carrier protein, putative                   | 0,9084 | 7,611E-18  |
| TcCLB.506331.104 | retrotransposon hot spot protein (RHS, pseudogene), puta  | 0,9084 | 5,181E-07  |
| TcCLB.503441.19  | retrotransposon hot spot protein (RHS, pseudogene), puta  | 0,9083 | 1,532E-11  |
| TcCLB.503579.90  | hypothetical protein, conserved                           | 0,9076 | 3,523E-14  |
| TcCLB.505171.90  | hypothetical protein                                      | 0,9073 | 1,764E-14  |
| TcCLB.511323.40  | histone H2A, putative                                     | 0,9072 | 9,63E-09   |
| TcCLB.503563.14  | ADG1, putative                                            | 0,9071 | 1,747E-12  |
| TcCLB.504153.340 | hypothetical protein, conserved                           | 0,9068 | 1,333E-19  |
| TcCLB.506925.110 | hypothetical protein, conserved                           | 0,9064 | 1,025E-29  |
| TcCLB.509695.170 | 60S ribosomal protein L9, putative                        | 0,9062 | 1,728E-46  |
| TcCLB.509693.200 | hypothetical protein, conserved                           | 0,9062 | 8,089E-12  |
| TcCLB.510863.20  | hypothetical protein                                      | 0,9061 | 3,928E-16  |
| TcCLB.506715.40  | hypothetical protein, conserved                           | 0,9055 | 5,688E-24  |
| TcCLB.507873.60  | 1,2-Dihydroxy-3-keto-5-methylthiopentene dioxygenase, p   | 0,9054 | 3,013E-07  |
| TcCLB.508625.160 | pumilio/PUF RNA binding protein 1, putative (PUF1)        | 0,9051 | 4,76E-21   |
| TcCLB.510515.60  | cytosolic leucyl aminopeptidase, putative                 | 0,905  | 2,883E-16  |
| TcCLB.508859.30  | hypothetical protein, conserved                           | 0,9046 | 4,225E-16  |
| TcCLB.506469.80  | protein kinase, putative                                  | 0,9046 | 9,426E-10  |
| TcCLB.511255.470 | retrotransposon hot spot protein (RHS, pseudogene), puta  | 0,9042 | 0,0003447  |
| TcCLB.510661.140 | hypothetical protein, conserved                           | 0,904  | 4,032E-20  |
| TcCLB.511817.240 | hypothetical protein, conserved                           | 0,904  | 7,011E-12  |
| TcCLB.506295.100 | hypothetical protein, conserved                           | 0,9038 | 1,442E-29  |
| TcCLB.506925.230 | hypothetical protein, conserved                           | 0,9037 | 9,406E-30  |
| TcCLB.507581.9   | dispersed gene family protein 1 (DGF-1), putative (fragme | 0,9033 | 0,00003359 |
| TcCLB.511419.30  | hypothetical protein, conserved                           | 0,903  | 3,7E-10    |
| TcCLB.507529.50  | hypothetical protein, conserved                           | 0,9029 | 4,173E-33  |
| TcCLB.509331.60  | hypothetical protein, conserved                           | 0,9029 | 3,403E-10  |
| TcCLB.507681.160 | 40S ribosomal protein S24E, putative                      | 0,9021 | 4,331E-14  |
| TcCLB.511771.210 | dispersed gene family protein 1 (DGF-1), putative         | 0,9021 | 1,8E-08    |
| TcCLB.506797.30  | hypothetical protein                                      | 0,9015 | 3,82E-26   |
| TcCLB.511071.171 | 60S ribosomal protein L12, putative                       | 0,9012 | 1,436E-37  |
| TcCLB.508319.70  | 40S ribosomal protein S11, putative                       | 0,9003 | 6,156E-29  |
| TcCLB.509599.100 | hypothetical protein                                      | 0,9003 | 3,383E-07  |
| TcCLB.506467.50  | serine/threonine protein kinase, putative                 | 0,9002 | 5,93E-25   |
| TcCLB.509153.120 | acyl-CoA dehydrogenase, putative                          | 0,9    | 2,189E-20  |
| TcCLB.508065.40  | hypothetical protein, conserved                           | 0,9    | 9,334E-15  |
| TcCLB.508975.20  | pre-rRNA-processing protein tsr1 homolog                  | 0,8998 | 3,219E-25  |
| TcCLB.509767.230 | hypothetical protein, conserved                           | 0,8997 | 5,077E-12  |
| TcCLB.509647.180 | nicotinate phosphoribosyltransferase, putative            | 0,8994 | 2,286E-24  |
| TcCLB.510359.604 | mucin TcMUCII (pseudogene), putative                      | 0,8991 | 0,0008967  |
| TcCLB.509461.10  | actin interacting protein-like protein, putative          | 0,8985 | 2,665E-20  |
| TcCLB.485335.10  | retrotransposon hot spot protein (RHS, pseudogene), puta  | 0,8985 | 5,126E-09  |
| TcCLB.510713.50  | beta galactofuranosyl glycosyltransferase (pseudogene), p | 0,8985 | 0,001581   |
| TcCLB.506469.30  | protein kinase, putative                                  | 0,8983 | 8,177E-08  |
| TcCLB.505035.20  | DNA-directed RNA polymerase II subunit 2 (pseudogene),    | 0,8982 | 1,66E-10   |



|                  |                                                               |        |            |
|------------------|---------------------------------------------------------------|--------|------------|
| TcCLB.503893.70  | reductase, putative                                           | 0,898  | 1,778E-16  |
| TcCLB.511585.260 | dispersed gene family protein 1 (DGF-1, pseudogene), putative | 0,8975 | 5,476E-10  |
| TcCLB.509611.150 | hypothetical protein, conserved                               | 0,8974 | 3,076E-15  |
| TcCLB.508269.20  | hypothetical protein, conserved                               | 0,8968 | 5,366E-09  |
| TcCLB.508873.370 | hypothetical protein                                          | 0,8967 | 0,00138    |
| TcCLB.511753.60  | ESAG8-associated protein, putative (PIE8)                     | 0,8966 | 2,154E-10  |
| TcCLB.504021.74  | hypothetical protein, conserved                               | 0,8965 | 5,683E-09  |
| TcCLB.503603.20  | hypothetical protein, conserved                               | 0,8962 | 8,743E-14  |
| TcCLB.508911.70  | hypothetical protein                                          | 0,8958 | 1,649E-15  |
| TcCLB.506435.400 | hypothetical protein, conserved                               | 0,8954 | 2,006E-21  |
| TcCLB.506495.3   | hypothetical protein, conserved                               | 0,8953 | 0,00001023 |
| TcCLB.504949.14  | 60S ribosomal protein L6, putative                            | 0,8951 | 5,24E-18   |
| TcCLB.508059.4   | hypothetical protein, conserved                               | 0,8949 | 1,42E-09   |
| TcCLB.511887.45  | hypothetical protein, conserved (pseudogene)                  | 0,8945 | 0,02419    |
| TcCLB.508687.20  | retrotransposon hot spot protein (RHS, pseudogene), putative  | 0,894  | 2,207E-10  |
| TcCLB.506751.70  | retrotransposon hot spot protein (RHS, pseudogene), putative  | 0,8939 | 0,001797   |
| TcCLB.508325.160 | retrotransposon hot spot (RHS) protein, putative              | 0,8937 | 2,272E-21  |
| TcCLB.511245.30  | ion transport protein, putative                               | 0,8936 | 4E-15      |
| TcCLB.511725.130 | hypothetical protein, conserved                               | 0,8933 | 5,82E-32   |
| TcCLB.508831.120 | glucosamine 6-phosphate n-acetyltransferase, putative         | 0,8926 | 3,167E-09  |
| TcCLB.510055.140 | hypothetical protein, conserved                               | 0,8923 | 4,232E-12  |
| TcCLB.508737.70  | cytochrome b5-dependent oleate desaturase                     | 0,8918 | 4,405E-17  |
| TcCLB.508379.10  | fucose kinase, putative                                       | 0,8917 | 1,949E-08  |
| TcCLB.506401.240 | hypothetical protein, conserved                               | 0,8916 | 7,382E-28  |
| TcCLB.508647.200 | triosephosphate isomerase, putative (TIM)                     | 0,8915 | 1,186E-40  |
| TcCLB.508415.50  | ADP-ribosylation factor 1, putative (ARF1)                    | 0,8915 | 3,108E-16  |
| TcCLB.508729.18  | hypothetical protein, conserved                               | 0,8911 | 4,061E-15  |
| TcCLB.510187.150 | guanylate kinase, putative                                    | 0,8908 | 1,137E-14  |
| TcCLB.510719.40  | hypothetical protein, conserved                               | 0,8908 | 4,419E-11  |
| TcCLB.511249.20  | ADP/ATP translocase, putative                                 | 0,8907 | 4,208E-20  |
| TcCLB.509529.60  | dispersed gene family protein 1 (DGF-1), putative             | 0,8907 | 9,605E-12  |
| TcCLB.508719.40  | kinetoplast DNA-associated protein, putative                  | 0,8904 | 1,614E-14  |
| TcCLB.511291.40  | protein kinase, putative                                      | 0,8902 | 2,262E-20  |
| TcCLB.505945.60  | hypothetical protein, conserved                               | 0,8901 | 2,023E-15  |
| TcCLB.506895.40  | Kinesin-13 1, putative (KIN13-1)                              | 0,89   | 1,433E-18  |
| TcCLB.506183.40  | retrotransposon hot spot protein (RHS, pseudogene), putative  | 0,8897 | 4,094E-08  |
| TcCLB.510947.40  | agmatinase, putative                                          | 0,8895 | 3,935E-12  |
| TcCLB.511367.150 | hypothetical protein, conserved                               | 0,8892 | 1,005E-14  |
| TcCLB.508045.90  | oxidoreductase, putative                                      | 0,889  | 3,565E-15  |
| TcCLB.504181.30  | 40S ribosomal protein S23, putative                           | 0,889  | 9,086E-07  |
| TcCLB.508325.270 | retrotransposon hot spot protein (RHS, pseudogene), putative  | 0,8887 | 2,694E-12  |
| TcCLB.508351.60  | hypothetical protein, conserved                               | 0,8884 | 1,671E-17  |
| TcCLB.503935.20  | 2-oxoglutarate dehydrogenase, E2 component, dihydrolipic      | 0,888  | 1,122E-27  |
| TcCLB.438147.18  | hypothetical protein, conserved                               | 0,8879 | 1,723E-06  |
| TcCLB.506821.150 | hypothetical protein, conserved                               | 0,8874 | 1,146E-16  |

|                  |                                                           |        |            |
|------------------|-----------------------------------------------------------|--------|------------|
| TcCLB.510101.300 | hypothetical protein, conserved                           | 0,8866 | 1,575E-28  |
| TcCLB.508355.260 | 60S acidic ribosomal protein P0, putative (P0)            | 0,8864 | 2,886E-45  |
| TcCLB.504151.80  | Na/H antiporter-like protein, putative                    | 0,8859 | 5,785E-11  |
| TcCLB.508027.120 | hypothetical protein, conserved                           | 0,8858 | 1,53E-16   |
| TcCLB.506619.40  | tyrosyl-DNA Phosphodiesterase (Tdp1), putative            | 0,8858 | 9,184E-13  |
| TcCLB.504081.30  | trans-sialidase (pseudogene), putative                    | 0,8856 | 0,00001111 |
| TcCLB.510123.50  | iron-sulfur cluster assembly protein, putative            | 0,8854 | 4,161E-16  |
| TcCLB.506117.9   | dispersed gene family protein 1 (DGF-1), putative         | 0,8852 | 1,162E-09  |
| TcCLB.504427.170 | hypothetical protein, conserved                           | 0,8846 | 1,132E-09  |
| TcCLB.511301.80  | choline/carnitine O-acyltransferase (pseudogene), putativ | 0,8844 | 1,994E-19  |
| TcCLB.511771.143 | retrotransposon hot spot protein (RHS, pseudogene), puta  | 0,8841 | 0,001357   |
| TcCLB.506977.60  | hypothetical protein, conserved                           | 0,884  | 3,043E-10  |
| TcCLB.509029.90  | hypothetical protein, conserved                           | 0,884  | 8,674E-10  |
| TcCLB.507779.30  | dispersed gene family protein 1 (DGF-1), putative         | 0,884  | 2,872E-08  |
| TcCLB.508175.309 | 60S ribosomal protein L19, putative                       | 0,8834 | 1,729E-23  |
| TcCLB.511159.30  | Present in the outer mitochondrial membrane proteome 1    | 0,8831 | 3,482E-13  |
| TcCLB.510149.150 | NADH-ubiquinone oxidoreductase complex I subunit, putat   | 0,8831 | 2,455E-10  |
| TcCLB.506887.100 | protein kinase, putative                                  | 0,8829 | 4,941E-10  |
| TcCLB.510089.60  | hypothetical protein, conserved                           | 0,8828 | 4,1E-09    |
| TcCLB.510105.220 | transportin2-like protein, putative                       | 0,8826 | 1,366E-17  |
| TcCLB.508693.80  | ruvB-like DNA helicase, putative                          | 0,8825 | 1,088E-27  |
| TcCLB.509671.64  | ribosomal protein L36, putative                           | 0,8824 | 1,907E-14  |
| TcCLB.510299.50  | GPI alpha-mannosyltransferase III (GPI10)                 | 0,8823 | 5,187E-24  |
| TcCLB.509331.100 | hypothetical protein, conserved                           | 0,8822 | 1,567E-09  |
| TcCLB.506645.9   | dispersed gene family protein 1 (DGF-1), putative         | 0,8822 | 0,00000212 |
| TcCLB.510303.320 | dihydrofolate reductase-thymidylate synthase, putative    | 0,8818 | 2,727E-12  |
| TcCLB.507063.170 | hypothetical protein                                      | 0,8815 | 8,647E-06  |
| TcCLB.510287.50  | hypothetical protein, conserved                           | 0,8814 | 6,922E-11  |
| TcCLB.508551.20  | 40S ribosomal protein S12, putative                       | 0,8813 | 3,4E-30    |
| TcCLB.507809.160 | hypothetical protein, conserved                           | 0,8813 | 6,357E-16  |
| TcCLB.505419.20  | retrotransposon hot spot protein (RHS, pseudogene), puta  | 0,8813 | 1,46E-13   |
| TcCLB.507275.40  | hypothetical protein, conserved                           | 0,881  | 2,224E-10  |
| TcCLB.507049.190 | hypothetical protein, conserved                           | 0,8806 | 3,2E-23    |
| TcCLB.508461.440 | hypothetical protein, conserved                           | 0,8806 | 9,356E-15  |
| TcCLB.510763.34  | hypothetical protein, conserved                           | 0,8803 | 2,724E-11  |
| TcCLB.510735.50  | hypothetical protein, conserved                           | 0,8802 | 2,985E-15  |
| TcCLB.510661.90  | ATP-dependent RNA helicase, putative                      | 0,8798 | 2,158E-20  |
| TcCLB.504103.60  | hypothetical protein, conserved                           | 0,8794 | 9,844E-09  |
| TcCLB.506675.90  | retrotransposon hot spot protein (RHS, pseudogene), puta  | 0,8793 | 3,371E-08  |
| TcCLB.507501.25  | hypothetical protein, conserved (pseudogene)              | 0,8793 | 0,008811   |
| TcCLB.510999.10  | hypothetical protein, conserved                           | 0,879  | 1,611E-15  |
| TcCLB.456021.10  | hypothetical protein, conserved (fragment)                | 0,879  | 0,00009005 |
| TcCLB.506405.149 | ribosomal protein L21E (60S), putative                    | 0,8789 | 1,517E-45  |
| TcCLB.507101.20  | hypothetical protein (pseudogene)                         | 0,8787 | 0,0002607  |
| TcCLB.506657.20  | hypothetical protein, conserved                           | 0,8786 | 4,39E-15   |

|                  |                                                          |        |           |
|------------------|----------------------------------------------------------|--------|-----------|
| TcCLB.506735.30  | hypothetical protein, conserved                          | 0,8785 | 3,974E-14 |
| TcCLB.508299.60  | 60S ribosomal protein L2, putative                       | 0,8783 | 3,876E-36 |
| TcCLB.505999.20  | phosphate-repressible phosphate permease, putative       | 0,8783 | 3,873E-20 |
| TcCLB.508641.280 | hypothetical protein, conserved                          | 0,8776 | 2,05E-31  |
| TcCLB.510349.30  | phosphatidylinositol-4-phosphate 5-kinase, putative      | 0,8776 | 2,513E-12 |
| TcCLB.508479.330 | hypothetical protein, conserved                          | 0,8775 | 2,172E-24 |
| TcCLB.506773.104 | hypothetical protein, conserved                          | 0,8774 | 7,479E-15 |
| TcCLB.507735.50  | hypothetical protein, conserved (pseudogene)             | 0,8772 | 4,34E-25  |
| TcCLB.509991.80  | hypothetical protein, conserved                          | 0,8772 | 1,785E-13 |
| TcCLB.506855.180 | adenylate kinase, putative                               | 0,877  | 1,888E-10 |
| TcCLB.511441.10  | calpain cysteine peptidase, putative                     | 0,877  | 2,313E-09 |
| TcCLB.511117.10  | retrotransposon hot spot protein (RHS, pseudogene), puta | 0,8767 | 5,17E-12  |
| TcCLB.506257.5   | aminopeptidase, putative (fragment)                      | 0,8766 | 1,291E-06 |
| TcCLB.509339.10  | hypothetical protein, conserved                          | 0,8765 | 1,69E-12  |
| TcCLB.508221.410 | hypothetical protein                                     | 0,8765 | 0,03184   |
| TcCLB.507615.110 | Present in the outer mitochondrial membrane proteome     | 0,876  | 1,406E-13 |
| TcCLB.505171.100 | hypothetical protein, conserved                          | 0,8759 | 1,411E-08 |
| TcCLB.504035.70  | cyclophilin, putative                                    | 0,8756 | 9,728E-12 |
| TcCLB.509331.9   | 5'-3' exoribonuclease C, putative (fragment) (XRNC)      | 0,8756 | 7,246E-06 |
| TcCLB.506055.40  | dispersed gene family protein 1 (DGF-1), putative        | 0,8755 | 3,338E-06 |
| TcCLB.506263.40  | hypothetical protein, conserved                          | 0,8753 | 1,477E-10 |
| TcCLB.510687.30  | hypothetical protein, conserved                          | 0,8752 | 2,015E-30 |
| TcCLB.504177.30  | hypothetical protein, conserved                          | 0,8752 | 7,92E-14  |
| TcCLB.509563.50  | hypothetical protein, conserved                          | 0,875  | 7,545E-12 |
| TcCLB.506475.90  | hypothetical protein, conserved                          | 0,8749 | 1,961E-14 |
| TcCLB.511545.120 | superoxide dismutase, putative                           | 0,8748 | 1,827E-14 |
| TcCLB.510301.20  | fructose-bisphosphate aldolase, glycosomal, putative     | 0,8745 | 8,337E-15 |
| TcCLB.503801.20  | ribosomal protein S26, putative                          | 0,8744 | 2,222E-29 |
| TcCLB.503669.39  | hypothetical protein, conserved (fragment)               | 0,8742 | 0,0001478 |
| TcCLB.505987.20  | hypothetical protein                                     | 0,874  | 2,687E-18 |
| TcCLB.511307.3   | membrane transporter protein, putative (fragment)        | 0,874  | 1,738E-09 |
| TcCLB.510519.10  | hypothetical protein                                     | 0,8739 | 6,865E-20 |
| TcCLB.510903.40  | hypothetical protein, conserved                          | 0,8738 | 2,608E-12 |
| TcCLB.506707.20  | ATP-dependent DEAD/H RNA helicase (pseudogene), puta     | 0,8738 | 0,001165  |
| TcCLB.510659.130 | hypothetical protein, conserved                          | 0,8734 | 1,246E-29 |
| TcCLB.506679.150 | 40S ribosomal protein S10, putative                      | 0,873  | 3,791E-10 |
| TcCLB.503611.40  | ribosomal protein L24, putative                          | 0,8729 | 0,002468  |
| TcCLB.508909.310 | hypothetical protein                                     | 0,8728 | 3,545E-07 |
| TcCLB.509337.28  | hypothetical protein, conserved (pseudogene)             | 0,8727 | 7,149E-16 |
| TcCLB.511411.24  | hypothetical protein, conserved                          | 0,8726 | 7,216E-11 |
| TcCLB.507857.50  | protein phosphatase, putative                            | 0,8725 | 2,132E-17 |
| TcCLB.509759.10  | L-ribulokinase, putative                                 | 0,8721 | 6,242E-07 |
| TcCLB.509233.60  | hypothetical protein, conserved                          | 0,8718 | 5,943E-18 |
| TcCLB.506407.10  | lysosomal alpha-mannosidase precursor, putative          | 0,8716 | 3,29E-16  |
| TcCLB.510101.410 | hypothetical protein, conserved                          | 0,8715 | 2,51E-19  |

|                  |                                                           |        |            |
|------------------|-----------------------------------------------------------|--------|------------|
| TcCLB.471901.10  | hypothetical protein, conserved                           | 0,871  | 1,354E-20  |
| TcCLB.510403.20  | retrotransposon hot spot protein (RHS, pseudogene), puta  | 0,871  | 3,725E-13  |
| TcCLB.509029.20  | hypothetical protein, conserved                           | 0,8707 | 3,351E-19  |
| TcCLB.511819.40  | hypothetical protein, conserved                           | 0,8706 | 1,407E-16  |
| TcCLB.510055.110 | fructosamine kinase, putative                             | 0,8705 | 8,24E-12   |
| TcCLB.508153.290 | 60S ribosomal protein L13, putative                       | 0,8704 | 8,145E-31  |
| TcCLB.507975.10  | retrotransposon hot spot protein (RHS, pseudogene), puta  | 0,8704 | 3,497E-23  |
| TcCLB.511809.135 | histone H2A, putative                                     | 0,8697 | 1,461E-20  |
| TcCLB.506941.159 | zinc finger protein, putative                             | 0,8695 | 1,317E-16  |
| TcCLB.507573.6   | ATP-dependent DEAD/H RNA helicase (pseudogene), puta      | 0,8695 | 0,00008202 |
| TcCLB.509911.20  | hypothetical protein                                      | 0,8694 | 0,00004264 |
| TcCLB.506529.530 | Present in the outer mitochondrial membrane proteome 1    | 0,8693 | 1,823E-07  |
| TcCLB.507573.3   | N-acetyltransferase complex ARD1 subunit (pseudogene),    | 0,8693 | 0,00007332 |
| TcCLB.509859.50  | hypothetical protein, conserved                           | 0,8692 | 9,002E-13  |
| TcCLB.509151.100 | hypothetical protein, conserved                           | 0,869  | 1,652E-15  |
| TcCLB.503899.130 | glutathione peroxidase-like protein, putative             | 0,8688 | 5,16E-10   |
| TcCLB.508269.10  | hypothetical protein, conserved                           | 0,8686 | 7,739E-15  |
| TcCLB.511231.34  | hypothetical protein, conserved                           | 0,8686 | 3,306E-14  |
| TcCLB.509109.145 | hypothetical protein, conserved (pseudogene)              | 0,8685 | 1,074E-06  |
| TcCLB.511715.10  | iron superoxide dismutase, putative                       | 0,8684 | 1,284E-12  |
| TcCLB.509555.10  | hypothetical protein (fragment)                           | 0,8683 | 6,767E-11  |
| TcCLB.509065.50  | hypothetical protein, conserved                           | 0,8682 | 2,293E-14  |
| TcCLB.507559.100 | hypothetical protein, conserved                           | 0,8678 | 2,791E-29  |
| TcCLB.509965.30  | small nuclear ribonucleoprotein Sm-E, putative            | 0,8675 | 0,00000461 |
| TcCLB.506621.60  | acyl-CoA binding protein, putative                        | 0,867  | 3,791E-25  |
| TcCLB.508909.230 | calcium-transporting ATPase (pseudogene), putative        | 0,8665 | 4,724E-13  |
| TcCLB.506679.140 | 40S ribosomal protein S10, putative                       | 0,8663 | 8,432E-12  |
| TcCLB.510857.60  | cation-transporting ATPase, putative                      | 0,8661 | 6,348E-14  |
| TcCLB.507649.90  | hypothetical protein, conserved                           | 0,866  | 6,013E-19  |
| TcCLB.509337.19  | hypothetical protein, conserved                           | 0,8657 | 4,05E-10   |
| TcCLB.510529.39  | hypothetical protein, conserved                           | 0,8657 | 1,391E-06  |
| TcCLB.508479.340 | succinyl-CoA synthetase alpha subunit, putative           | 0,8656 | 2,719E-32  |
| TcCLB.509911.100 | chaperone DNAJ protein, putative                          | 0,8656 | 9,157E-12  |
| TcCLB.509819.20  | hypothetical protein, conserved                           | 0,8653 | 7,208E-28  |
| TcCLB.510733.5   | hypothetical protein, conserved (fragment)                | 0,8651 | 3,181E-07  |
| TcCLB.510655.150 | hypothetical protein, conserved                           | 0,8649 | 2,43E-10   |
| TcCLB.417939.9   | dispersed gene family protein 1 (DGF-1), putative         | 0,8648 | 0,003643   |
| TcCLB.511511.159 | zinc finger protein, putative                             | 0,8645 | 8,472E-21  |
| TcCLB.511211.200 | hypothetical protein, conserved                           | 0,8645 | 5,249E-16  |
| TcCLB.504137.30  | hypothetical protein                                      | 0,8641 | 1,45E-18   |
| TcCLB.509647.130 | hypothetical protein, conserved                           | 0,864  | 6,15E-15   |
| TcCLB.509367.15  | tryptophanyl-tRNA synthetase (pseudogene), putative       | 0,864  | 0,0002053  |
| TcCLB.503677.20  | DNA repair and recombination helicase protein PIF4, puta  | 0,8636 | 2,516E-08  |
| TcCLB.466007.9   | dispersed gene family protein 1 (DGF-1), putative (fragme | 0,8631 | 0,03907    |
| TcCLB.511001.30  | hypothetical protein, conserved                           | 0,8629 | 2,687E-15  |

|                   |                                                               |        |            |
|-------------------|---------------------------------------------------------------|--------|------------|
| TcCLB.509455.100  | hypothetical protein, conserved                               | 0,8624 | 2,099E-18  |
| TcCLB.504019.6    | hypothetical protein                                          | 0,8622 | 1,45E-23   |
| TcCLB.510949.20   | thioredoxin, putative                                         | 0,8621 | 5,522E-11  |
| TcCLB.506775.50   | hypothetical protein, conserved                               | 0,8619 | 6,617E-25  |
| TcCLB.508857.70   | hypothetical protein, conserved                               | 0,8618 | 1,315E-15  |
| TcCLB.511101.37   | retrotransposon hot spot protein (RHS, pseudogene), puta      | 0,8618 | 7,731E-11  |
| TcCLB.509611.80   | cation-transporting ATPase, putative                          | 0,8615 | 4,414E-23  |
| TcCLB.503703.90   | hypothetical protein, conserved                               | 0,8613 | 3,094E-08  |
| TcCLB.507817.80   | 5'-3' exoribonuclease A, putative (fragment) (XRNA)           | 0,8612 | 1,092E-30  |
| TcCLB.510119.40   | hypothetical protein, conserved                               | 0,861  | 3,618E-06  |
| TcCLB.506825.30   | hypothetical protein, conserved                               | 0,8609 | 1,137E-13  |
| TcCLB.508043.30   | ubiquitin-activating enzyme E1, putative                      | 0,8606 | 1,559E-31  |
| TcCLB.506975.69   | hypothetical protein, conserved                               | 0,8604 | 8,898E-08  |
| TcCLB.510997.40   | enoyl-CoA hydratase/isomerase family protein, putative        | 0,8598 | 7,672E-19  |
| TcCLB.507735.10   | hypothetical protein, conserved                               | 0,8598 | 6,231E-06  |
| TcCLB.510391.10   | dispersed gene family protein 1 (DGF-1), putative             | 0,8595 | 0,002081   |
| TcCLB.507775.20   | hypothetical protein, conserved                               | 0,8594 | 1,556E-11  |
| TcCLB.506629.130  | hypothetical protein, conserved                               | 0,8592 | 1,751E-11  |
| TcCLB.507063.20   | eukaryotic translation initiation factor 2 beta subunit, puta | 0,8589 | 1,31E-19   |
| TcCLB.509179.70   | hypothetical protein, conserved                               | 0,8585 | 0,00007588 |
| TcCLB.504165.20   | hypothetical protein, conserved                               | 0,8581 | 7,778E-12  |
| TcCLB.504575.20   | hypothetical protein, conserved                               | 0,8581 | 2,719E-10  |
| TcCLB.508153.1070 | hypothetical protein, conserved                               | 0,8579 | 8,848E-16  |
| TcCLB.509187.20   | retrotransposon hot spot protein (RHS, pseudogene), puta      | 0,8579 | 0,01272    |
| TcCLB.511003.110  | hypothetical protein, conserved                               | 0,8578 | 1,577E-10  |
| TcCLB.511635.69   | hypothetical protein, conserved                               | 0,8577 | 7,391E-06  |
| TcCLB.504669.40   | mucin-associated surface protein (MASP, pseudogene), pu       | 0,8576 | 7,853E-14  |
| TcCLB.511907.350  | surface protease GP63 (pseudogene), putative                  | 0,8576 | 0,0004303  |
| TcCLB.510879.20   | ribosomal protein S19, putative                               | 0,8574 | 6,032E-29  |
| TcCLB.510355.110  | hypothetical protein, conserved (pseudogene)                  | 0,8574 | 1,853E-06  |
| TcCLB.511471.90   | glycine dehydrogenase [decarboxylating] (pseudogene), pu      | 0,8574 | 0,00002766 |
| TcCLB.510307.330  | dispersed gene family protein 1 (DGF-1), putative             | 0,8572 | 1,644E-08  |
| TcCLB.507503.20   | glycine dehydrogenase [decarboxylating] (pseudogene), pu      | 0,857  | 4,947E-14  |
| TcCLB.509459.79   | actin interacting protein-like protein, putative              | 0,8568 | 4,987E-16  |
| TcCLB.505115.10   | hypothetical protein, conserved                               | 0,8566 | 1,3E-16    |
| TcCLB.509011.54   | ubiquinol-cytochrome c reductase, putative                    | 0,8566 | 0,00000929 |
| TcCLB.508355.240  | hypothetical protein, conserved                               | 0,8565 | 7,364E-08  |
| TcCLB.508965.80   | hypothetical protein, conserved                               | 0,8561 | 6,005E-15  |
| TcCLB.509693.140  | hypothetical protein, conserved                               | 0,856  | 8,711E-20  |
| TcCLB.511333.4    | Calpain-like protein 1 (CAP5.5)                               | 0,8559 | 1,228E-11  |
| TcCLB.509805.220  | cholinephosphate cytidyltransferase A, putative               | 0,8554 | 3,952E-24  |
| TcCLB.510755.50   | ADP-ribosylation factor 1, putative (ARF1)                    | 0,8552 | 2,858E-23  |
| TcCLB.484299.10   | trypanothione reductase, putative                             | 0,8551 | 1,722E-11  |
| TcCLB.507281.9    | dispersed gene family protein 1 (DGF-1, pseudogene), put      | 0,855  | 0,008111   |
| TcCLB.509207.50   | hypothetical protein, conserved                               | 0,8546 | 4,633E-25  |

|                  |                                                            |        |            |
|------------------|------------------------------------------------------------|--------|------------|
| TcCLB.504161.10  | hypothetical protein                                       | 0,8544 | 4,33E-13   |
| TcCLB.509837.10  | hypothetical protein, conserved                            | 0,8542 | 2,109E-14  |
| TcCLB.511871.30  | hypothetical protein, conserved                            | 0,8537 | 1,204E-17  |
| TcCLB.509207.11  | histone H2A, putative                                      | 0,8534 | 1,348E-27  |
| TcCLB.506635.10  | hypothetical protein (pseudogene)                          | 0,8534 | 7,795E-07  |
| TcCLB.510435.30  | hypothetical protein, conserved                            | 0,853  | 3,294E-17  |
| TcCLB.507641.50  | hypothetical protein, conserved                            | 0,8527 | 2,338E-23  |
| TcCLB.466593.10  | hypothetical protein, conserved                            | 0,8527 | 4,554E-10  |
| TcCLB.507875.170 | ribosomal P protein AGP2beta-1, putative                   | 0,8524 | 2,476E-06  |
| TcCLB.509393.10  | hypothetical protein, conserved                            | 0,8523 | 1,965E-16  |
| TcCLB.504123.30  | map kinase, putative                                       | 0,8523 | 8,907E-14  |
| TcCLB.505401.31  | trans-sialidase (pseudogene), putative                     | 0,8519 | 1,001E-09  |
| TcCLB.507081.20  | hypothetical protein, conserved                            | 0,8517 | 6,181E-16  |
| TcCLB.508501.165 | U6 snRNA-associated Sm-like protein LSm6p                  | 0,8511 | 0,0000361  |
| TcCLB.503745.20  | hypothetical protein, conserved                            | 0,8508 | 2,351E-19  |
| TcCLB.507021.110 | phosphopantothencysteine decarboxylase, putative (PP       | 0,8505 | 2,176E-14  |
| TcCLB.510719.60  | Biotin--acetyl-CoA-carboxylase ligase, putative            | 0,8504 | 9,044E-14  |
| TcCLB.508271.10  | phenylalanyl-tRNA synthetase, putative                     | 0,8503 | 6,937E-25  |
| TcCLB.510013.50  | trans-sialidase, Group IV, putative                        | 0,8502 | 0,01047    |
| TcCLB.506529.324 | hypothetical protein, conserved                            | 0,8501 | 2,09E-07   |
| TcCLB.508169.20  | elongation factor 2, putative                              | 0,8499 | 7,318E-38  |
| TcCLB.511295.50  | hypothetical protein, conserved                            | 0,8499 | 3,743E-30  |
| TcCLB.507829.10  | cysteine peptidase, Clan CA, family C2, putative           | 0,8499 | 1,963E-08  |
| TcCLB.503763.10  | retrotransposon hot spot (RHS) protein, putative           | 0,8497 | 0,00003796 |
| TcCLB.506727.10  | hypothetical protein                                       | 0,8496 | 1,372E-14  |
| TcCLB.511807.230 | hypothetical protein                                       | 0,8494 | 1,249E-19  |
| TcCLB.511391.200 | pitrilysin-like metalloprotease, putative                  | 0,8492 | 1,717E-34  |
| TcCLB.511665.50  | dispersed gene family protein 1 (DGF-1), putative          | 0,8492 | 1,456E-07  |
| TcCLB.506959.120 | 60S ribosomal protein L30, putative                        | 0,8488 | 6,453E-28  |
| TcCLB.503781.80  | universal minicircle sequence binding protein 1 (UMSBP1)   | 0,8488 | 2,089E-12  |
| TcCLB.506595.30  | retrotransposon hot spot protein (RHS, pseudogene), puta   | 0,8487 | 5,537E-12  |
| TcCLB.504081.450 | trans-sialidase (pseudogene), putative                     | 0,8487 | 0,00003663 |
| TcCLB.508657.10  | hypothetical protein, conserved                            | 0,8486 | 8,622E-10  |
| TcCLB.511577.60  | DNA excision/repair protein SNF2, putative                 | 0,848  | 6,073E-16  |
| TcCLB.503899.110 | glutathione peroxidase-like protein, putative              | 0,8479 | 2,343E-13  |
| TcCLB.509799.140 | L-2-hydroxyglutarate dehydrogenase, mitochondrial, putat   | 0,8479 | 6,136E-13  |
| TcCLB.506063.50  | retrotransposon hot spot protein (RHS, pseudogene), puta   | 0,8475 | 8,916E-09  |
| TcCLB.424123.40  | RNA-binding protein, putative                              | 0,8469 | 1,866E-08  |
| TcCLB.506055.30  | retrotransposon hot spot protein (RHS, pseudogene), puta   | 0,8468 | 0,00004308 |
| TcCLB.506289.30  | hypothetical protein, conserved                            | 0,8466 | 2,906E-09  |
| TcCLB.508717.33  | mitochondrial chaperone BCS1, putative                     | 0,8465 | 2,387E-17  |
| TcCLB.506167.20  | hypothetical protein, conserved                            | 0,8464 | 8,776E-24  |
| TcCLB.510675.9   | dispersed gene family protein 1 (DGF-1), putative (fragm   | 0,846  | 0,0003814  |
| TcCLB.509719.53  | hypothetical protein, conserved                            | 0,8458 | 3,384E-16  |
| TcCLB.507639.20  | universal minicircle sequence binding protein, putative (U | 0,8458 | 5,528E-08  |

|                  |                                                               |        |            |
|------------------|---------------------------------------------------------------|--------|------------|
| TcCLB.506375.50  | dispersed gene family protein 1 (DGF-1), putative             | 0,8458 | 4,754E-07  |
| TcCLB.507683.40  | protein kinase, putative                                      | 0,8455 | 5,951E-18  |
| TcCLB.506391.20  | calmodulin, putative                                          | 0,8455 | 3,253E-08  |
| TcCLB.506247.190 | nuclear lim interactor-interacting factor, putative           | 0,8453 | 0,00007651 |
| TcCLB.510731.90  | protein kinase, putative                                      | 0,845  | 8,054E-09  |
| TcCLB.506547.10  | dispersed gene family protein 1 (DGF-1, pseudogene), putative | 0,845  | 0,004068   |
| TcCLB.508993.10  | cytidine triphosphate synthase, putative                      | 0,8449 | 2,362E-26  |
| TcCLB.508823.90  | hypothetical protein                                          | 0,8449 | 1,212E-09  |
| TcCLB.506529.541 | hypothetical protein                                          | 0,8449 | 0,00001228 |
| TcCLB.510795.4   | CLC-type chloride channel protein (pseudogene), putative      | 0,8449 | 0,009632   |
| TcCLB.507513.60  | 40S ribosomal protein S16, putative                           | 0,8446 | 3,189E-21  |
| TcCLB.511195.10  | retrotransposon hot spot protein (RHS, pseudogene), putative  | 0,8446 | 0,01042    |
| TcCLB.504171.40  | hypothetical protein, conserved                               | 0,8444 | 9,155E-10  |
| TcCLB.507765.149 | hypothetical protein, conserved                               | 0,8441 | 5,014E-12  |
| TcCLB.506519.51  | hypothetical protein, conserved                               | 0,8439 | 2,804E-16  |
| TcCLB.508741.170 | glycerate kinase, putative                                    | 0,8436 | 2,094E-35  |
| TcCLB.441241.10  | microtubule-associated protein Gb4, putative (fragment)       | 0,8434 | 2,238E-12  |
| TcCLB.510741.150 | Present in the outer mitochondrial membrane proteome          | 0,8432 | 1,851E-11  |
| TcCLB.506671.70  | dispersed gene family protein 1 (DGF-1), putative             | 0,8428 | 0,0007897  |
| TcCLB.510323.60  | hypothetical protein                                          | 0,8426 | 2,588E-09  |
| TcCLB.509805.140 | hypothetical protein                                          | 0,8421 | 4,354E-10  |
| TcCLB.508319.30  | hypothetical protein, conserved                               | 0,8419 | 1,127E-29  |
| TcCLB.509769.120 | hypothetical protein, conserved                               | 0,8419 | 2,61E-27   |
| TcCLB.508039.70  | hypothetical protein, conserved                               | 0,8419 | 5,966E-22  |
| TcCLB.452699.10  | retrotransposon hot spot protein (RHS, pseudogene), putative  | 0,8418 | 8,023E-11  |
| TcCLB.506529.120 | hypothetical protein                                          | 0,8417 | 3,738E-13  |
| TcCLB.510767.10  | ribosomal protein L15, putative                               | 0,8416 | 1,345E-26  |
| TcCLB.507723.189 | bloodstream-specific protein 2 precursor (fragment)           | 0,8415 | 3,038E-11  |
| TcCLB.509317.60  | RNA-binding protein, putative                                 | 0,8414 | 3,547E-17  |
| TcCLB.507615.19  | microtubule-associated protein, putative, (fragment) (GB)     | 0,8411 | 6,712E-23  |
| TcCLB.509511.10  | dispersed gene family protein 1 (DGF-1), putative             | 0,8411 | 5,392E-07  |
| TcCLB.510265.100 | hypothetical protein, conserved                               | 0,8409 | 1,722E-17  |
| TcCLB.510431.10  | isopentenyl-diphosphate delta-isomerase (fragment) (idi1)     | 0,8409 | 7,479E-13  |
| TcCLB.504147.20  | 60S ribosomal protein L18, putative                           | 0,8405 | 9,02E-33   |
| TcCLB.504153.20  | phosphoglycerate kinase, putative                             | 0,8404 | 5,761E-21  |
| TcCLB.506223.110 | hypothetical protein, conserved                               | 0,8401 | 2,22E-16   |
| TcCLB.509895.40  | hypothetical protein, conserved                               | 0,8399 | 6,973E-18  |
| TcCLB.508689.50  | GPI transamidase subunit 16, putative (fragment) (GPI16)      | 0,8397 | 7,622E-07  |
| TcCLB.509331.221 | hypothetical protein, conserved                               | 0,8397 | 0,003718   |
| TcCLB.508461.510 | 60S ribosomal protein L27A/L29, putative                      | 0,8396 | 2,825E-11  |
| TcCLB.507603.70  | kinetoplastid kinetochore protein 6, putative (kkt6)          | 0,8396 | 2,376E-06  |
| TcCLB.507153.40  | tryptophanyl-tRNA synthetase (pseudogene), putative           | 0,8393 | 0,0001897  |
| TcCLB.506893.40  | hypothetical protein, conserved                               | 0,8392 | 0,00005899 |
| TcCLB.508891.30  | hypothetical protein, conserved                               | 0,839  | 6,444E-23  |
| TcCLB.511233.20  | 60S ribosomal protein L34, putative                           | 0,8388 | 4,316E-26  |

|                  |                                                               |        |            |
|------------------|---------------------------------------------------------------|--------|------------|
| TcCLB.505037.30  | hypothetical protein, conserved                               | 0,8388 | 0,003065   |
| TcCLB.506679.70  | eukaryotic translation initiation factor 6 (eIF-6), putative  | 0,8387 | 1,537E-21  |
| TcCLB.511051.50  | 40S ribosomal protein S4, putative                            | 0,8386 | 1,109E-31  |
| TcCLB.506857.100 | endoplasmatic reticulum retrieval protein, putative           | 0,8385 | 1,184E-19  |
| TcCLB.510515.20  | hypothetical protein, conserved (pseudogene)                  | 0,8384 | 1,243E-14  |
| TcCLB.503635.40  | hypothetical protein                                          | 0,8383 | 2,885E-12  |
| TcCLB.508637.150 | ribonuclease L inhibitor, putative                            | 0,8382 | 1,189E-21  |
| TcCLB.505183.40  | DNA repair and recombination protein RAD54, putative          | 0,838  | 2,337E-21  |
| TcCLB.506861.30  | 60S ribosomal protein L14, putative                           | 0,8379 | 6,175E-25  |
| TcCLB.503897.20  | hypothetical protein, conserved                               | 0,8373 | 1,987E-13  |
| TcCLB.506529.110 | hypothetical protein, conserved                               | 0,8372 | 4,464E-12  |
| TcCLB.509601.50  | hypothetical protein, conserved                               | 0,8371 | 1,799E-22  |
| TcCLB.511239.140 | 60S ribosomal protein, putative                               | 0,8369 | 1,557E-08  |
| TcCLB.506477.10  | cytochrome c oxidase assembly factor, putative                | 0,8365 | 2,26E-13   |
| TcCLB.506457.20  | hypothetical protein, conserved                               | 0,8365 | 7,08E-10   |
| TcCLB.508405.40  | 40S ribosomal protein S11, putative                           | 0,8363 | 4,791E-22  |
| TcCLB.506959.64  | 3-keto-dihydrosphingosine reductase                           | 0,8363 | 1,19E-13   |
| TcCLB.508045.30  | hypothetical protein, conserved                               | 0,8361 | 1,732E-16  |
| TcCLB.509671.189 | hypothetical protein, conserved                               | 0,8359 | 1,055E-10  |
| TcCLB.504185.30  | hypothetical protein, conserved                               | 0,8357 | 5,814E-10  |
| TcCLB.504105.94  | ribosomal protein S25, putative                               | 0,8356 | 1,142E-28  |
| TcCLB.506489.59  | divalent cation tolerance protein, putative                   | 0,8356 | 0,0002189  |
| TcCLB.507851.60  | hypothetical protein, conserved                               | 0,8354 | 2,482E-16  |
| TcCLB.510767.20  | 60S ribosomal protein L36, putative                           | 0,8353 | 7,566E-21  |
| TcCLB.509793.40  | kinetoplast-associated protein (TcKAP4)                       | 0,8352 | 2,586E-12  |
| TcCLB.506559.30  | hypothetical protein, conserved                               | 0,8352 | 2,915E-12  |
| TcCLB.509499.10  | cyclophilin, putative (CYP)                                   | 0,835  | 6,507E-15  |
| TcCLB.510643.110 | beta galactofuranosyl glycosyltransferase, putative           | 0,835  | 1,423E-07  |
| TcCLB.508267.60  | hypothetical protein, conserved (fragment)                    | 0,8346 | 9,277E-09  |
| TcCLB.507851.50  | hypothetical protein, conserved                               | 0,8343 | 2,923E-20  |
| TcCLB.503701.9   | dispersed gene family protein 1 (DGF-1, pseudogene), putative | 0,8343 | 0,00008908 |
| TcCLB.507059.70  | dihydroorotase, putative                                      | 0,8336 | 2,768E-12  |
| TcCLB.506457.140 | hypothetical protein, conserved                               | 0,8336 | 1,595E-06  |
| TcCLB.507559.20  | hypothetical protein, conserved                               | 0,8333 | 1,428E-13  |
| TcCLB.506929.30  | hypothetical protein, conserved                               | 0,833  | 4,117E-13  |
| TcCLB.506701.20  | Tob55, putative                                               | 0,8326 | 9,719E-12  |
| TcCLB.511291.120 | DNA-directed RNA polymerase III subunit C11, putative (R)     | 0,832  | 1,45E-08   |
| TcCLB.511697.30  | hypothetical protein                                          | 0,832  | 0,002975   |
| TcCLB.511827.130 | dispersed gene family protein 1 (DGF-1), putative             | 0,8319 | 1,785E-12  |
| TcCLB.505057.10  | hypothetical protein, conserved                               | 0,8318 | 3,485E-12  |
| TcCLB.510575.100 | hypothetical protein, conserved                               | 0,8316 | 1,015E-10  |
| TcCLB.507641.233 | ribosomal protein L37, putative                               | 0,8315 | 3,364E-20  |
| TcCLB.510663.30  | 60S ribosomal subunit protein L31, putative                   | 0,8314 | 1,84E-22   |
| TcCLB.507653.30  | hypothetical protein                                          | 0,8312 | 0,0001506  |
| TcCLB.509593.59  | dispersed gene family protein 1 (DGF-1), putative             | 0,8312 | 0,1382     |



|                  |                                                           |        |            |
|------------------|-----------------------------------------------------------|--------|------------|
| TcCLB.508817.60  | ribosomal protein S26, putative                           | 0,831  | 8,311E-26  |
| TcCLB.507243.9   | dispersed gene family protein 1 (DGF-1), putative         | 0,831  | 0,00003755 |
| TcCLB.508211.30  | sphingosine kinase A, B, putative                         | 0,8307 | 1,745E-14  |
| TcCLB.505915.40  | beta galactofuranosyl glycosyltransferase (pseudogene), f | 0,8307 | 0,0003236  |
| TcCLB.506743.69  | hypothetical protein, conserved                           | 0,8304 | 4,324E-08  |
| TcCLB.508505.4   | hypothetical protein, conserved                           | 0,8304 | 3,268E-06  |
| TcCLB.443397.9   | NADH-cytochrome b5 reductase, putative (fragment)         | 0,8298 | 3,945E-09  |
| TcCLB.511829.10  | dispersed gene family protein 1 (DGF-1), putative         | 0,8297 | 3,477E-13  |
| TcCLB.511911.130 | phosphoglucomutase                                        | 0,8297 | 2,372E-12  |
| TcCLB.508649.20  | hypothetical protein, conserved                           | 0,8294 | 1,806E-25  |
| TcCLB.509761.20  | 3,2-trans-enoyl-CoA isomerase, mitochondrial precursor (f | 0,8294 | 8,474E-20  |
| TcCLB.510965.5   | elongation factor 2, putative (fragment)                  | 0,8293 | 1,383E-24  |
| TcCLB.511771.30  | beta galactofuranosyl glycosyltransferase (pseudogene), f | 0,8293 | 0,00004222 |
| TcCLB.511619.5   | FtsJ cell division protein, putative (fragment)           | 0,829  | 4,238E-13  |
| TcCLB.510857.54  | hypothetical protein, conserved                           | 0,8289 | 8,425E-10  |
| TcCLB.503611.20  | ribosomal protein L24, putative                           | 0,8281 | 1,286E-18  |
| TcCLB.511001.190 | vacuolar ATP synthase subunit d, putative                 | 0,8278 | 8,042E-16  |
| TcCLB.504251.9   | peroxisome assembly protein, putative (fragment)          | 0,8277 | 5,803E-13  |
| TcCLB.507669.200 | hypothetical protein, conserved                           | 0,8277 | 1,306E-11  |
| TcCLB.504539.10  | mucin TcSMUGL, putative                                   | 0,8277 | 0,002167   |
| TcCLB.505919.40  | protein kinase, putative                                  | 0,8275 | 0,0005745  |
| TcCLB.511587.60  | retrotransposon hot spot protein (RHS, pseudogene), puta  | 0,8273 | 4,782E-11  |
| TcCLB.508297.41  | hypothetical protein, conserved                           | 0,8273 | 2,073E-06  |
| TcCLB.509965.270 | hypothetical protein, conserved                           | 0,827  | 6,076E-17  |
| TcCLB.508231.20  | 40S ribosomal protein S12, putative                       | 0,8268 | 1,912E-26  |
| TcCLB.504827.60  | hypothetical protein, conserved                           | 0,8264 | 2,514E-15  |
| TcCLB.509027.50  | hypothetical protein, conserved                           | 0,8264 | 1,464E-08  |
| TcCLB.510859.17  | nucleolar RNA-binding protein, putative                   | 0,8262 | 1,223E-30  |
| TcCLB.422507.10  | glycine dehydrogenase [decarboxylating], putative         | 0,8262 | 2,617E-06  |
| TcCLB.507787.20  | hypothetical protein, conserved                           | 0,8261 | 1,543E-20  |
| TcCLB.506333.10  | plasma-membrane proton-efflux P-type ATPase, putative     | 0,8255 | 5,76E-36   |
| TcCLB.504863.10  | retrotransposon hot spot (RHS) protein, putative          | 0,8255 | 4,705E-18  |
| TcCLB.511181.130 | hypothetical protein                                      | 0,8253 | 1,087E-10  |
| TcCLB.503647.40  | hypothetical protein                                      | 0,8253 | 1,9E-09    |
| TcCLB.504153.140 | metallo-peptidase, Clan MF, Family M17                    | 0,8252 | 1,335E-22  |
| TcCLB.508221.539 | hypothetical protein, conserved                           | 0,8246 | 0,07826    |
| TcCLB.507105.60  | hypothetical protein, conserved                           | 0,8245 | 4,624E-18  |
| TcCLB.509209.10  | endoplasmatic reticulum retrieval protein, putative       | 0,8239 | 4,829E-22  |
| TcCLB.507017.20  | Present in the outer mitochondrial membrane proteome f    | 0,8238 | 9,635E-11  |
| TcCLB.503453.70  | hypothetical protein, conserved                           | 0,8237 | 9,806E-20  |
| TcCLB.511069.20  | 40S ribosomal protein S8, putative                        | 0,8237 | 1,427E-16  |
| TcCLB.511765.40  | retrotransposon hot spot protein (RHS, pseudogene), puta  | 0,8229 | 3,682E-09  |
| TcCLB.511807.130 | hypothetical protein, conserved                           | 0,8224 | 0,0004962  |
| TcCLB.511529.50  | hypothetical protein, conserved                           | 0,8222 | 0,0000111  |
| TcCLB.419043.10  | hypothetical protein, conserved                           | 0,8219 | 9,115E-07  |

|                  |                                                                                               |        |           |
|------------------|-----------------------------------------------------------------------------------------------|--------|-----------|
| TcCLB.509951.30  | hypothetical protein, conserved                                                               | 0,8214 | 3,583E-16 |
| TcCLB.508157.50  | trans-sialidase, putative                                                                     | 0,8213 | 4,872E-06 |
| TcCLB.510997.10  | 3-keto-dihydrosphingosine reductase                                                           | 0,8211 | 5,858E-15 |
| TcCLB.503869.40  | pumilio/PUF RNA binding protein 9, putative (PUF9)                                            | 0,8211 | 4,262E-09 |
| TcCLB.510343.5   | hypothetical protein, conserved (fragment)                                                    | 0,821  | 1,904E-09 |
| TcCLB.506327.30  | hypothetical protein, conserved                                                               | 0,8206 | 1,819E-22 |
| TcCLB.511809.140 | histone H2A, putative                                                                         | 0,8203 | 4,587E-19 |
| TcCLB.508185.10  | enoyl-CoA hydratase, mitochondrial precursor, putative                                        | 0,8197 | 2,551E-13 |
| TcCLB.506303.111 | hypothetical protein, conserved                                                               | 0,8196 | 6,867E-16 |
| TcCLB.457547.9   | dispersed gene family protein 1 (DGF-1), putative                                             | 0,8195 | 0,0008609 |
| TcCLB.509875.210 | 60S ribosomal protein L17, putative                                                           | 0,8193 | 1,007E-26 |
| TcCLB.511655.10  | hypothetical protein, conserved                                                               | 0,8191 | 3,037E-06 |
| TcCLB.508537.10  | glyceraldehyde 3-phosphate dehydrogenase, cytosolic, putative                                 | 0,819  | 0,001272  |
| TcCLB.503531.20  | hypothetical protein, conserved                                                               | 0,8189 | 2,169E-14 |
| TcCLB.510241.50  | 60S ribosomal protein L10, putative                                                           | 0,8188 | 1,727E-24 |
| TcCLB.508299.20  | hypothetical protein, conserved                                                               | 0,8188 | 2,671E-09 |
| TcCLB.508441.70  | enoyl-CoA hydratase/Enoyl-CoA isomerase/3-hydroxyacyl-nucleolar RNA-binding protein, putative | 0,8182 | 6,065E-19 |
| TcCLB.510289.6   | dispersed gene family protein 1 (DGF-1, pseudogene), putative                                 | 0,8182 | 3,962E-09 |
| TcCLB.511063.80  | dispersed gene family protein 1 (DGF-1, pseudogene), putative                                 | 0,8182 | 0,005398  |
| TcCLB.510773.120 | hypothetical protein                                                                          | 0,8181 | 0,05937   |
| TcCLB.510575.190 | 60S ribosomal protein L10, putative                                                           | 0,8176 | 1,236E-20 |
| TcCLB.510861.14  | hypothetical protein, conserved (fragment)                                                    | 0,8173 | 5,253E-15 |
| TcCLB.424195.5   | hypothetical protein, conserved                                                               | 0,8168 | 0,02189   |
| TcCLB.504159.70  | hypothetical protein, conserved                                                               | 0,8166 | 9,628E-11 |
| TcCLB.504073.30  | ribonucleoside-diphosphate reductase large chain, putative                                    | 0,8161 | 3,618E-06 |
| TcCLB.506529.50  | arginine N-methyltransferase, putative                                                        | 0,816  | 1,834E-13 |
| TcCLB.509587.10  | mitochondrial DNA polymerase I protein D, putative                                            | 0,8159 | 4,681E-29 |
| TcCLB.510823.30  | Isoprenylcysteine alpha-carbonyl methylesterase, putative                                     | 0,8152 | 6,062E-19 |
| TcCLB.508785.4   | hypothetical protein, conserved (fragment)                                                    | 0,8149 | 6,132E-17 |
| TcCLB.504929.10  | casein kinase, delta isoform, putative                                                        | 0,8146 | 0,04986   |
| TcCLB.505071.80  | hypothetical protein                                                                          | 0,8145 | 7,5E-16   |
| TcCLB.509261.30  | 3,2-trans-enoyl-CoA isomerase, mitochondrial precursor, putative                              | 0,8144 | 3,863E-22 |
| TcCLB.503425.20  | monothiol glutaredoxin, putative                                                              | 0,8144 | 2,63E-11  |
| TcCLB.507515.80  | hypothetical protein, conserved                                                               | 0,8143 | 2,082E-10 |
| TcCLB.503925.60  | hypothetical protein                                                                          | 0,8142 | 3,976E-14 |
| TcCLB.508567.80  | DNA repair and recombination helicase protein PIF7, putative                                  | 0,8139 | 7,264E-19 |
| TcCLB.509567.60  | hypothetical protein                                                                          | 0,8139 | 3,312E-14 |
| TcCLB.410241.10  | retrotransposon hot spot protein (RHS, pseudogene), putative                                  | 0,8138 | 0,03758   |
| TcCLB.511303.60  | translation initiation factor, putative                                                       | 0,8137 | 2,646E-30 |
| TcCLB.510187.320 | hypothetical protein                                                                          | 0,8137 | 9,689E-14 |
| TcCLB.511811.10  | 40S ribosomal protein S15, putative                                                           | 0,8137 | 0,00321   |
| TcCLB.510243.119 | hypothetical protein, conserved                                                               | 0,8136 | 2,073E-09 |
| TcCLB.508415.40  | ADP-ribosylation factor 1, putative (ARF1)                                                    | 0,8131 | 1,18E-18  |
| TcCLB.506413.20  | 40S ribosomal protein S33, putative                                                           | 0,8131 | 5,454E-18 |
| TcCLB.510149.130 | hypothetical protein, conserved                                                               | 0,8131 | 1,72E-09  |

|                  |                                                                |        |            |
|------------------|----------------------------------------------------------------|--------|------------|
| TcCLB.511467.60  | hypothetical protein, conserved                                | 0,8128 | 2,418E-10  |
| TcCLB.505077.9   | dispersed gene family protein 1 (DGF-1), putative (fragment)   | 0,8125 | 0,00305    |
| TcCLB.511825.260 | ribosomal RNA processing protein 45, putative (RRP45)          | 0,8124 | 3,823E-11  |
| TcCLB.505773.10  | retrotransposon hot spot protein (RHS, pseudogene), putative   | 0,812  | 0,00001696 |
| TcCLB.508641.184 | Protein translation factor SUI1 homolog, putative              | 0,8117 | 9,874E-09  |
| TcCLB.507739.50  | hypothetical protein, conserved                                | 0,8115 | 6,618E-06  |
| TcCLB.507245.40  | dispersed gene family protein 1 (DGF-1), putative              | 0,811  | 1,588E-07  |
| TcCLB.509331.200 | ABC transporter, putative                                      | 0,811  | 4,648E-07  |
| TcCLB.506855.80  | ATP synthase, putative                                         | 0,8109 | 1,465E-16  |
| TcCLB.506583.40  | cdc2-related kinase 3, putative (CRK3)                         | 0,8108 | 1,285E-07  |
| TcCLB.507589.14  | tryptophanyl-tRNA synthetase, putative                         | 0,8104 | 4,155E-37  |
| TcCLB.506375.10  | tryptophanyl-tRNA synthetase, putative                         | 0,8104 | 0,00776    |
| TcCLB.506247.390 | hypothetical protein, conserved                                | 0,8101 | 2,471E-17  |
| TcCLB.510719.30  | ribosomal protein L29, putative                                | 0,8093 | 3,061E-17  |
| TcCLB.510531.10  | hypothetical protein, conserved                                | 0,8092 | 1,06E-20   |
| TcCLB.510547.30  | trans-sialidase (pseudogene), putative                         | 0,8089 | 0,00253    |
| TcCLB.511809.20  | methylenetetrahydrofolate dehydrogenase-like protein, putative | 0,8087 | 6,189E-13  |
| TcCLB.506435.134 | Enriched in surface-labeled proteome protein 11, putative      | 0,8086 | 4,017E-10  |
| TcCLB.508461.40  | hypothetical protein, conserved                                | 0,8086 | 5,564E-08  |
| TcCLB.508041.80  | protein transport protein Sec31, putative (pseudogene)         | 0,8083 | 1,827E-22  |
| TcCLB.506537.160 | glycine dehydrogenase [decarboxylating] (pseudogene), putative | 0,8079 | 3,958E-10  |
| TcCLB.510725.99  | Chaperonin HSP60, mitochondrial (HSP60)                        | 0,8079 | 0,0001819  |
| TcCLB.510687.120 | snoRNP protein GAR1, putative                                  | 0,8078 | 7,069E-11  |
| TcCLB.506743.200 | 3-Beta-hydroxysteroid-delta(8), delta(7)-isomerase, putative   | 0,8078 | 7,565E-08  |
| TcCLB.511425.30  | hypothetical protein, conserved                                | 0,8074 | 9,628E-11  |
| TcCLB.504055.30  | hypothetical protein                                           | 0,8073 | 1,192E-09  |
| TcCLB.507625.170 | hypothetical protein, conserved                                | 0,8069 | 2,089E-14  |
| TcCLB.506213.60  | 40S ribosomal protein S2, putative                             | 0,8069 | 0,01042    |
| TcCLB.507927.20  | mitochondrial oligo_U binding protein TBRGG1, putative         | 0,8068 | 7,447E-10  |
| TcCLB.507873.34  | hypothetical protein, conserved                                | 0,8068 | 0,00000603 |
| TcCLB.506963.14  | 40S ribosomal protein S27, putative                            | 0,8067 | 1,223E-17  |
| TcCLB.504157.10  | heterogeneous nuclear ribonucleoprotein H/F, putative          | 0,8066 | 7,202E-12  |
| TcCLB.511807.64  | DNA repair protein, putative                                   | 0,8064 | 5,726E-14  |
| TcCLB.508973.9   | hypothetical protein, conserved (fragment)                     | 0,8064 | 1,116E-08  |
| TcCLB.511901.30  | Glycerophosphoryl diester phosphodiesterase family, putative   | 0,8061 | 1,139E-14  |
| TcCLB.511837.80  | hypothetical protein, conserved                                | 0,8059 | 6,308E-11  |
| TcCLB.505163.50  | hypothetical protein                                           | 0,8059 | 0,01209    |
| TcCLB.460757.20  | hypothetical protein (fragment)                                | 0,8058 | 0,03043    |
| TcCLB.505317.9   | trans-sialidase, putative (fragment)                           | 0,8053 | 4,89E-07   |
| TcCLB.509025.10  | hypothetical protein, conserved                                | 0,8053 | 0,00001499 |
| TcCLB.509695.200 | T-complex protein 1, delta subunit, putative                   | 0,8052 | 5,837E-25  |
| TcCLB.510761.73  | dynein-associated protein, putative                            | 0,8052 | 6,667E-09  |
| TcCLB.509723.20  | glycine dehydrogenase (pseudogene), putative                   | 0,8048 | 0,01009    |
| TcCLB.510357.120 | hypothetical protein, conserved                                | 0,8044 | 0,009328   |
| TcCLB.508461.4   | hypothetical protein, conserved                                | 0,8042 | 2,511E-14  |

|                  |                                                           |        |            |
|------------------|-----------------------------------------------------------|--------|------------|
| TcCLB.506925.460 | hypothetical protein, conserved                           | 0,8039 | 7,543E-09  |
| TcCLB.504059.30  | hypothetical protein, conserved                           | 0,8033 | 1,6E-21    |
| TcCLB.506213.80  | 60S ribosomal protein L17, putative                       | 0,8032 | 1,407E-09  |
| TcCLB.506063.59  | dispersed gene family protein 1 (DGF-1), putative         | 0,8031 | 0,000562   |
| TcCLB.511657.30  | hypothetical protein, conserved                           | 0,8027 | 1,626E-15  |
| TcCLB.511277.170 | ATP-dependent zinc metallopeptidase, putative             | 0,8019 | 5,781E-22  |
| TcCLB.511829.20  | retrotransposon hot spot protein (RHS, pseudogene), puta  | 0,8019 | 0,00000432 |
| TcCLB.508323.60  | centrin-4, putative (Centrin4)                            | 0,8018 | 3,778E-19  |
| TcCLB.503763.30  | retrotransposon hot spot protein (RHS, pseudogene), puta  | 0,8017 | 9,655E-16  |
| TcCLB.511417.30  | hypothetical protein, conserved                           | 0,8016 | 4,135E-12  |
| TcCLB.505807.209 | hypothetical protein, conserved                           | 0,8016 | 1,177E-06  |
| TcCLB.507513.70  | 40S ribosomal protein S16, putative                       | 0,8015 | 7,442E-24  |
| TcCLB.506151.4   | hypothetical protein, conserved (fragment)                | 0,801  | 1,006E-09  |
| TcCLB.511671.110 | hypothetical protein, conserved                           | 0,801  | 7,442E-07  |
| TcCLB.504443.30  | DNA-directed RNA polymerase II subunit 2, putative (pseu  | 0,8009 | 2,179E-19  |
| TcCLB.506943.80  | hypothetical protein, conserved                           | 0,8006 | 3,728E-23  |
| TcCLB.511821.110 | translation initiation factor IF-2, putative              | 0,8006 | 8,855E-19  |
| TcCLB.503583.24  | hypothetical protein, conserved                           | 0,8001 | 1,057E-22  |
| TcCLB.504797.90  | hypothetical protein, conserved                           | 0,7999 | 1,213E-08  |
| TcCLB.509215.30  | hypothetical protein, conserved                           | 0,7998 | 6,785E-07  |
| TcCLB.511019.13  | retrotransposon hot spot (RHS) protein, putative (fragmer | 0,7993 | 1,573E-14  |
| TcCLB.503453.40  | 60S ribosomal protein L30, putative                       | 0,7992 | 6,771E-07  |
| TcCLB.509089.9   | dispersed gene family protein 1 (DGF-1), putative         | 0,7987 | 0,00001412 |
| TcCLB.509921.51  | hypothetical protein, conserved (pseudogene)              | 0,7985 | 0,0003126  |
| TcCLB.504163.100 | hypothetical protein, conserved                           | 0,7979 | 2,774E-15  |
| TcCLB.511211.130 | receptor for activated C kinase 1, putative               | 0,7978 | 1,432E-20  |
| TcCLB.510755.60  | ADP-ribosylation factor 1, putative (ARF1)                | 0,7978 | 5,977E-06  |
| TcCLB.509365.11  | tryptophanyl-tRNA synthetase (pseudogene), putative       | 0,7974 | 0,00002668 |
| TcCLB.510683.20  | hypothetical protein, conserved                           | 0,7972 | 1,137E-08  |
| TcCLB.504089.70  | hypothetical protein, conserved                           | 0,797  | 5,947E-08  |
| TcCLB.503909.19  | dispersed gene family protein 1 (DGF-1), putative (fragme | 0,797  | 0,0005047  |
| TcCLB.511421.10  | hypothetical protein, conserved                           | 0,7965 | 1,691E-19  |
| TcCLB.510517.10  | chaperonin/T-complex protein 1 gamma subunit, putative    | 0,7965 | 2,755E-17  |
| TcCLB.509177.68  | translation initiation factor, putative                   | 0,7958 | 9,9E-10    |
| TcCLB.506989.10  | hypothetical protein, conserved                           | 0,7958 | 3,229E-08  |
| TcCLB.503579.119 | hypothetical protein, conserved                           | 0,7958 | 0,00003612 |
| TcCLB.503571.10  | flagellum-adhesion glycoprotein, putative                 | 0,7957 | 5,537E-17  |
| TcCLB.508421.20  | dispersed gene family protein 1 (DGF-1, pseudogene), put  | 0,7956 | 0,0000781  |
| TcCLB.511389.140 | hypothetical protein, conserved                           | 0,7955 | 4,999E-09  |
| TcCLB.509165.34  | ribosomal P protein AGP2beta-1, putative                  | 0,7954 | 5,707E-11  |
| TcCLB.510533.100 | hypothetical protein, conserved                           | 0,7954 | 1,997E-07  |
| TcCLB.511145.20  | 60S ribosomal protein L32, putative                       | 0,7953 | 8,935E-20  |
| TcCLB.511145.60  | ATP synthase F1 subunit gamma protein, putative (ATPF1    | 0,7953 | 7,488E-14  |
| TcCLB.456097.30  | glycerophosphoryl diester phosphodiesterase, putative     | 0,7953 | 7,007E-10  |
| TcCLB.510735.100 | hypothetical protein, conserved                           | 0,795  | 9,864E-09  |

|                   |                                                          |        |            |
|-------------------|----------------------------------------------------------|--------|------------|
| TcCLB.506503.160  | hypothetical protein, conserved                          | 0,7948 | 1,193E-23  |
| TcCLB.509805.150  | hypothetical protein, conserved                          | 0,7948 | 2,042E-12  |
| TcCLB.506861.10   | ATP-dependent DEAD/H RNA helicase, putative              | 0,7946 | 5,08E-13   |
| TcCLB.507673.20   | 60S ribosomal protein L13a, putative                     | 0,7944 | 2,424E-19  |
| TcCLB.506885.40   | hypothetical protein, conserved                          | 0,7942 | 9,373E-16  |
| TcCLB.509233.160  | alpha-tubulin N-acetyltransferase, putative              | 0,7942 | 1,959E-10  |
| TcCLB.507265.15   | transcription activator, putative (fragment)             | 0,7935 | 8,111E-23  |
| TcCLB.509461.70   | hypothetical protein, conserved                          | 0,7933 | 6,895E-15  |
| TcCLB.508153.1040 | hypothetical protein, conserved                          | 0,7933 | 4,799E-12  |
| TcCLB.510731.120  | hypothetical protein, conserved                          | 0,7932 | 5,181E-11  |
| TcCLB.508003.30   | hypothetical protein, conserved (pseudogene)             | 0,7932 | 1,539E-07  |
| TcCLB.508501.280  | hypothetical protein, conserved                          | 0,7932 | 1,89E-07   |
| TcCLB.511017.25   | hypothetical protein                                     | 0,7931 | 0,00005098 |
| TcCLB.507231.20   | trans-sialidase (pseudogene), putative                   | 0,7931 | 0,001302   |
| TcCLB.506789.180  | glutaminyl cyclase, putative                             | 0,7929 | 1,186E-17  |
| TcCLB.506819.40   | hypothetical protein, conserved                          | 0,7922 | 1,331E-10  |
| TcCLB.510699.110  | retrotransposon hot spot protein (RHS, pseudogene), puta | 0,7922 | 2,653E-06  |
| TcCLB.503973.255  | hypothetical protein, conserved (pseudogene)             | 0,792  | 0,03419    |
| TcCLB.511545.20   | ribosomal protein L27, putative                          | 0,7916 | 2,971E-19  |
| TcCLB.506773.80   | hypothetical protein, conserved                          | 0,7916 | 2,2E-15    |
| TcCLB.509209.20   | hypothetical protein, conserved                          | 0,7914 | 0,000021   |
| TcCLB.509395.10   | hypothetical protein, conserved                          | 0,7912 | 3,804E-11  |
| TcCLB.510901.70   | mitochondrial RNA binding complex 1 subunit, putative    | 0,791  | 8,307E-17  |
| TcCLB.504423.30   | hypothetical protein, conserved                          | 0,791  | 2,002E-08  |
| TcCLB.508153.170  | ubiquinone biosynthesis protein COQ7 homolog, putative   | 0,791  | 0,0000868  |
| TcCLB.506139.120  | trans-sialidase, Group V, putative                       | 0,7909 | 8,329E-06  |
| TcCLB.506435.420  | hypothetical protein, conserved                          | 0,7908 | 2,652E-07  |
| TcCLB.508787.14   | hypothetical protein, conserved                          | 0,7902 | 0,00002465 |
| TcCLB.511729.50   | hypothetical protein, conserved                          | 0,7901 | 1,228E-18  |
| TcCLB.509637.36   | procyclic form surface glycoprotein, putative (fragment) | 0,7901 | 2,564E-10  |
| TcCLB.510637.9    | dispersed gene family protein 1 (DGF-1), putative        | 0,7901 | 0,00003805 |
| TcCLB.506265.130  | hypothetical protein, conserved                          | 0,79   | 5,349E-13  |
| TcCLB.506489.40   | hypothetical protein, conserved                          | 0,7899 | 1,168E-11  |
| TcCLB.511419.70   | hypothetical protein                                     | 0,7899 | 6,767E-08  |
| TcCLB.507053.170  | hypothetical protein, conserved                          | 0,7897 | 1,93E-15   |
| TcCLB.511771.10   | retrotransposon hot spot protein (RHS, pseudogene), puta | 0,7897 | 2,704E-15  |
| TcCLB.505915.10   | retrotransposon hot spot protein (RHS, pseudogene), puta | 0,7896 | 7,596E-08  |
| TcCLB.504883.50   | hypothetical protein, conserved                          | 0,7891 | 2,43E-18   |
| TcCLB.506503.60   | hypothetical protein, conserved                          | 0,7889 | 6,548E-14  |
| TcCLB.506041.10   | hypothetical protein, conserved (fragment)               | 0,7889 | 1,611E-08  |
| TcCLB.511003.30   | mitochondrial RNA binding complex 1 subunit, putative (R | 0,7886 | 4,953E-21  |
| TcCLB.507615.130  | hypothetical protein, conserved                          | 0,7883 | 5,535E-08  |
| TcCLB.506469.40   | hypothetical protein, conserved                          | 0,7883 | 1,868E-06  |
| TcCLB.506835.30   | 60S ribosomal protein L9, putative                       | 0,7882 | 1,09E-28   |
| TcCLB.506565.20   | hypothetical protein, conserved                          | 0,7882 | 3,008E-09  |

|                  |                                                              |        |            |
|------------------|--------------------------------------------------------------|--------|------------|
| TcCLB.510407.60  | tyrosyl-tRNA synthetase (pseudogene), putative               | 0,788  | 5,05E-23   |
| TcCLB.510257.139 | transcription activator, putative                            | 0,7874 | 8,252E-12  |
| TcCLB.506739.150 | 60S ribosomal protein L13a, putative                         | 0,7873 | 2,721E-27  |
| TcCLB.507091.10  | hypothetical protein, conserved                              | 0,7871 | 0,01592    |
| TcCLB.506685.20  | hypothetical protein, conserved                              | 0,787  | 1,722E-11  |
| TcCLB.511211.120 | receptor for activated C kinase 1, putative                  | 0,7868 | 2,969E-28  |
| TcCLB.511523.70  | Present in the outer mitochondrial membrane proteome         | 0,7865 | 1,316E-06  |
| TcCLB.507087.80  | 5'-3' exoribonuclease B, putative (XRNB)                     | 0,7859 | 8,573E-15  |
| TcCLB.504071.40  | hypothetical protein                                         | 0,7859 | 2,851E-08  |
| TcCLB.504109.70  | mitochondrial carrier protein, putative                      | 0,7855 | 1,475E-18  |
| TcCLB.503453.30  | 60S ribosomal protein L30, putative                          | 0,7855 | 3,245E-17  |
| TcCLB.510307.200 | hypothetical protein, conserved                              | 0,7855 | 1,702E-09  |
| TcCLB.506359.80  | Dynein light chain roadblock-type protein, putative          | 0,7855 | 8,171E-09  |
| TcCLB.509735.70  | retrotransposon hot spot protein (RHS, pseudogene), puta     | 0,7853 | 1,409E-13  |
| TcCLB.507467.110 | hypothetical protein, conserved                              | 0,785  | 4,585E-19  |
| TcCLB.505193.90  | hypothetical protein, conserved                              | 0,7848 | 1,424E-14  |
| TcCLB.509645.30  | hypothetical protein, conserved                              | 0,7846 | 6,648E-11  |
| TcCLB.510603.140 | hypothetical protein                                         | 0,7845 | 2,294E-18  |
| TcCLB.507625.200 | hypothetical protein, conserved                              | 0,7843 | 1,932E-11  |
| TcCLB.508461.550 | hypothetical protein, conserved                              | 0,7843 | 6,558E-10  |
| TcCLB.508501.240 | hypothetical protein, conserved                              | 0,7842 | 8,111E-06  |
| TcCLB.511163.10  | seryl-tRNA synthetase, putative (fragment)                   | 0,7838 | 6,018E-21  |
| TcCLB.509733.140 | hypothetical protein, conserved                              | 0,7838 | 4,001E-17  |
| TcCLB.508965.30  | hypothetical protein                                         | 0,7837 | 1,152E-12  |
| TcCLB.503613.30  | DNA repair protein, putative                                 | 0,7833 | 2,058E-11  |
| TcCLB.511469.90  | hypothetical protein                                         | 0,783  | 1,156E-07  |
| TcCLB.509163.10  | hypothetical protein                                         | 0,7825 | 0,00000934 |
| TcCLB.509891.20  | hypothetical protein, conserved (pseudogene)                 | 0,7824 | 1,79E-08   |
| TcCLB.503687.30  | hypothetical protein, conserved                              | 0,7824 | 3,743E-06  |
| TcCLB.506789.310 | hypothetical protein, conserved                              | 0,7819 | 7,069E-11  |
| TcCLB.508027.40  | folate/pteridine transporter, putative                       | 0,7818 | 4,863E-18  |
| TcCLB.511717.150 | hypothetical protein, conserved                              | 0,7815 | 2,437E-12  |
| TcCLB.482471.10  | hypothetical protein, conserved                              | 0,7815 | 2,688E-10  |
| TcCLB.511035.10  | surface protease GP63, putative                              | 0,7813 | 6,265E-20  |
| TcCLB.503981.40  | DnaJ chaperone protein, putative                             | 0,781  | 8,52E-23   |
| TcCLB.511247.27  | RNA editing 3' terminal uridylyl transferase 1, putative     | 0,7809 | 1,512E-08  |
| TcCLB.506657.50  | ADP/ATP mitochondrial carrier protein (pseudogene), putative | 0,7808 | 5,308E-10  |
| TcCLB.511529.130 | hypothetical protein, conserved                              | 0,7808 | 4,724E-09  |
| TcCLB.508355.250 | 60S acidic ribosomal protein P0, putative (P0)               | 0,7805 | 6,646E-30  |
| TcCLB.508897.30  | ABC transport system ATP-binding protein, putative           | 0,7803 | 1,734E-25  |
| TcCLB.511221.35  | retrotransposon hot spot protein (RHS, pseudogene), puta     | 0,7798 | 1,415E-08  |
| TcCLB.509307.10  | retrotransposon hot spot protein (RHS, pseudogene), puta     | 0,7798 | 1,979E-08  |
| TcCLB.509177.20  | hypothetical protein                                         | 0,7794 | 1,461E-09  |
| TcCLB.509527.200 | hypothetical protein                                         | 0,7792 | 0,02121    |
| TcCLB.506417.20  | hypothetical protein, conserved                              | 0,779  | 0,00007204 |

|                  |                                                          |        |            |
|------------------|----------------------------------------------------------|--------|------------|
| TcCLB.503431.70  | hypothetical protein, conserved                          | 0,7781 | 8,581E-12  |
| TcCLB.504017.20  | hypothetical protein, conserved                          | 0,7779 | 5,707E-14  |
| TcCLB.506581.20  | hypothetical protein, conserved                          | 0,7779 | 1,824E-09  |
| TcCLB.509667.20  | tryptophanyl-tRNA synthetase (pseudogene), putative      | 0,7773 | 2,209E-06  |
| TcCLB.507081.40  | hypothetical protein, conserved                          | 0,7771 | 6,625E-11  |
| TcCLB.508139.210 | dispersed gene family protein 1 (DGF-1), putative        | 0,7771 | 5,036E-06  |
| TcCLB.506649.70  | fructose-1,6-bisphosphatase, cytosolic, putative         | 0,7769 | 6,159E-15  |
| TcCLB.503431.30  | hypothetical protein                                     | 0,7762 | 2,018E-06  |
| TcCLB.503811.10  | heat shock protein 90, putative (LPG3)                   | 0,7759 | 2,405E-15  |
| TcCLB.510053.60  | cytidine deaminase-like protein, putative                | 0,7759 | 5,766E-09  |
| TcCLB.509749.33  | ribosomal protein L29, putative                          | 0,7758 | 2,217E-15  |
| TcCLB.507521.44  | hypothetical protein, conserved                          | 0,7755 | 0,00001953 |
| TcCLB.506685.10  | hypothetical protein, conserved                          | 0,7752 | 9,911E-17  |
| TcCLB.508147.45  | hypothetical protein, conserved (pseudogene)             | 0,7748 | 0,008841   |
| TcCLB.504069.30  | 60S ribosomal protein L32, putative                      | 0,7747 | 6,098E-14  |
| TcCLB.511327.20  | hypothetical protein (fragment)                          | 0,7746 | 0,00001532 |
| TcCLB.509257.10  | trans-sialidase, Group II, putative                      | 0,7745 | 1,204E-13  |
| TcCLB.511825.69  | cyclophilin, putative                                    | 0,7742 | 2,795E-08  |
| TcCLB.503861.50  | beta galactofuranosyl glycosyltransferase, putative      | 0,7741 | 8,251E-17  |
| TcCLB.511871.10  | hypothetical protein, conserved                          | 0,7741 | 5,561E-06  |
| TcCLB.506351.50  | hypothetical protein                                     | 0,774  | 1,922E-08  |
| TcCLB.509561.20  | flagellum-adhesion glycoprotein, putative                | 0,7739 | 8,992E-15  |
| TcCLB.508017.20  | UDP-Gal or UDP-GlcNAc-dependent glycosyltransferase (γ   | 0,7739 | 0,003467   |
| TcCLB.510431.250 | phosphoribosylpyrophosphate synthetase, putative         | 0,7737 | 4,71E-20   |
| TcCLB.508555.34  | hypothetical protein, conserved                          | 0,7737 | 4,355E-06  |
| TcCLB.507801.160 | hypothetical protein, conserved                          | 0,7734 | 5,847E-09  |
| TcCLB.510733.20  | hypothetical protein, conserved                          | 0,7731 | 7,86E-14   |
| TcCLB.426397.9   | kinesin, putative (fragment)                             | 0,7731 | 3,203E-11  |
| TcCLB.506815.60  | 60S ribosomal protein L44 (RPL44)                        | 0,773  | 6,091E-23  |
| TcCLB.506475.110 | hypothetical protein                                     | 0,773  | 0,0001219  |
| TcCLB.507993.60  | hypothetical protein, conserved                          | 0,7727 | 2,808E-10  |
| TcCLB.511797.54  | dispersed gene family protein 1 (DGF-1), putative        | 0,7727 | 0,004813   |
| TcCLB.510155.10  | hypothetical protein, conserved                          | 0,7726 | 4,805E-29  |
| TcCLB.503847.10  | hypothetical protein, conserved (pseudogene)             | 0,7726 | 1,227E-14  |
| TcCLB.504443.10  | cysteine peptidase, Clan CA, family C19, putative        | 0,7723 | 1,374E-12  |
| TcCLB.505169.21  | phospholipid transporting ATPase-like protein (pseudogen | 0,7722 | 0,01066    |
| TcCLB.506595.110 | AGP2beta-2, putative                                     | 0,7721 | 5,771E-10  |
| TcCLB.508859.90  | phosphatidylinositol 3-kinase 2, putative                | 0,7718 | 1,183E-09  |
| TcCLB.511277.150 | hypothetical protein                                     | 0,7717 | 1,782E-19  |
| TcCLB.509613.10  | hypothetical protein, conserved                          | 0,771  | 1,852E-08  |
| TcCLB.510543.110 | hypothetical protein, conserved (pseudogene)             | 0,7707 | 0,00002647 |
| TcCLB.507499.50  | hypothetical protein, conserved (pseudogene)             | 0,7705 | 5,828E-07  |
| TcCLB.511755.19  | hypothetical protein, conserved                          | 0,7705 | 0,001864   |
| TcCLB.506413.80  | cyclophilin, putative                                    | 0,7703 | 1,149E-08  |
| TcCLB.506869.10  | hypothetical protein                                     | 0,77   | 2,228E-09  |

|                  |                                                               |        |            |
|------------------|---------------------------------------------------------------|--------|------------|
| TcCLB.506819.30  | superoxide dismutase, putative                                | 0,7696 | 1,375E-11  |
| TcCLB.508707.40  | hypothetical protein, conserved                               | 0,7695 | 4,623E-15  |
| TcCLB.506945.210 | Zinc finger CCCH domain-containing protein 47 (zc3h47)        | 0,7694 | 4,821E-25  |
| TcCLB.511537.69  | hypothetical protein, conserved                               | 0,7694 | 5,381E-15  |
| TcCLB.506243.50  | dispersed gene family protein 1 (DGF-1, pseudogene), putative | 0,7692 | 0,0001565  |
| TcCLB.511017.60  | hypothetical protein                                          | 0,7691 | 1,774E-19  |
| TcCLB.503925.40  | hypothetical protein                                          | 0,769  | 8,466E-08  |
| TcCLB.509229.110 | hypothetical protein, conserved                               | 0,7687 | 1,281E-16  |
| TcCLB.511825.30  | hypothetical protein, conserved                               | 0,7684 | 2,937E-09  |
| TcCLB.509787.30  | retrotransposon hot spot protein (RHS, pseudogene), putative  | 0,7683 | 3,031E-08  |
| TcCLB.508515.90  | hypothetical protein, conserved                               | 0,7683 | 3,313E-06  |
| TcCLB.507777.41  | trans-sialidase (pseudogene), putative                        | 0,768  | 0,002732   |
| TcCLB.510891.30  | retrotransposon hot spot protein (RHS, pseudogene), putative  | 0,7679 | 1,306E-11  |
| TcCLB.506567.110 | hypothetical protein, conserved                               | 0,7679 | 4,268E-11  |
| TcCLB.511843.40  | dispersed gene family protein 1 (DGF-1), putative             | 0,7679 | 0,000279   |
| TcCLB.506247.410 | protein-l-isoaspartate o-methyltransferase, putative          | 0,7677 | 6,269E-11  |
| TcCLB.509631.60  | dispersed gene family protein 1 (DGF-1), putative             | 0,7676 | 0,0005044  |
| TcCLB.508267.40  | hypothetical protein, conserved                               | 0,7675 | 1,331E-14  |
| TcCLB.511747.7   | cyclosome subunit, putative (fragment)                        | 0,7675 | 9,632E-10  |
| TcCLB.508153.460 | Present in the outer mitochondrial membrane proteome          | 0,7671 | 1,651E-17  |
| TcCLB.511267.30  | cholinephosphate cytidyltransferase A, putative               | 0,7669 | 4,955E-16  |
| TcCLB.507157.10  | mucin TcSMUGL, putative                                       | 0,7669 | 0,00003323 |
| TcCLB.506489.20  | monoglyceride lipase, putative                                | 0,7668 | 3,717E-20  |
| TcCLB.508087.10  | hypothetical protein                                          | 0,7668 | 5,411E-10  |
| TcCLB.511713.9   | hypothetical protein, conserved                               | 0,7668 | 0,000135   |
| TcCLB.509615.4   | hypothetical protein, conserved (pseudogene)                  | 0,7668 | 0,0005236  |
| TcCLB.509815.50  | beta galactofuranosyl glycosyltransferase, putative           | 0,7665 | 8,686E-06  |
| TcCLB.506631.20  | cardiolipin synthetase, putative (cls)                        | 0,7663 | 1,306E-12  |
| TcCLB.510773.110 | hypothetical protein, conserved                               | 0,7663 | 3,118E-07  |
| TcCLB.503681.20  | ethanolamine phosphotransferase, putative                     | 0,7661 | 1,098E-11  |
| TcCLB.511761.50  | sodium/hydrogen exchanger, putative (FTP)                     | 0,7661 | 1,706E-11  |
| TcCLB.510823.40  | hypothetical protein, conserved                               | 0,7658 | 1,989E-17  |
| TcCLB.508027.100 | hypothetical protein                                          | 0,7658 | 7,029E-12  |
| TcCLB.508707.200 | nucleoside diphosphate kinase (NDPK1)                         | 0,7657 | 1,24E-15   |
| TcCLB.506617.50  | hypothetical protein                                          | 0,7656 | 2,008E-09  |
| TcCLB.506975.63  | hypothetical protein, conserved                               | 0,7656 | 2,751E-09  |
| TcCLB.507849.50  | cysteine proteinase, putative                                 | 0,7655 | 2,152E-20  |
| TcCLB.506559.470 | ribosomal protein l35a, putative                              | 0,7654 | 9,394E-29  |
| TcCLB.503917.40  | hypothetical protein, conserved                               | 0,7654 | 5,963E-10  |
| TcCLB.511815.50  | hypothetical protein, conserved                               | 0,7653 | 8,425E-21  |
| TcCLB.506529.669 | hypothetical protein, conserved                               | 0,7652 | 2,925E-06  |
| TcCLB.508317.50  | ammonium transporter, putative                                | 0,7651 | 3,442E-14  |
| TcCLB.504097.40  | hypothetical protein, conserved                               | 0,7649 | 1,452E-13  |
| TcCLB.509059.30  | calcium-binding protein, putative                             | 0,7649 | 8,273E-07  |
| TcCLB.510773.50  | hypothetical protein                                          | 0,7647 | 0,00003268 |



|                   |                                                               |        |            |
|-------------------|---------------------------------------------------------------|--------|------------|
| TcCLB.506407.80   | intraflagellar transport protein 81, putative (IFT81)         | 0,7643 | 6,993E-26  |
| TcCLB.511003.150  | hypothetical protein                                          | 0,7639 | 2,76E-15   |
| TcCLB.505977.26   | 60S acidic ribosomal protein P2, putative                     | 0,7638 | 1,241E-18  |
| TcCLB.510945.30   | actin, putative                                               | 0,7638 | 1,125E-12  |
| TcCLB.508461.380  | calmodulin, putative                                          | 0,7637 | 2,538E-19  |
| TcCLB.506773.70   | transcription modulator/accessory protein, putative           | 0,7636 | 1,065E-17  |
| TcCLB.504213.120  | proteasome alpha 3 subunit, putative                          | 0,7635 | 5,694E-18  |
| TcCLB.506297.4    | hypothetical protein, conserved (pseudogene)                  | 0,7635 | 3,073E-08  |
| TcCLB.507991.40   | hypothetical protein                                          | 0,7632 | 5,501E-10  |
| TcCLB.503449.10   | 60S ribosomal protein L17, putative                           | 0,7628 | 1,215E-23  |
| TcCLB.510007.70   | ATP-dependent zinc metallopeptidase, putative                 | 0,7628 | 1,147E-10  |
| TcCLB.511183.330  | dispersed gene family protein 1 (DGF-1), putative             | 0,7627 | 0,002408   |
| TcCLB.506295.150  | hypothetical protein                                          | 0,7626 | 1,111E-07  |
| TcCLB.511661.90   | ribose-phosphate pyrophosphokinase, putative                  | 0,7625 | 1,967E-21  |
| TcCLB.504137.140  | hypothetical protein, conserved                               | 0,7624 | 4,046E-11  |
| TcCLB.508153.1080 | hypothetical protein, conserved                               | 0,7624 | 5,709E-08  |
| TcCLB.503973.10   | hypothetical protein                                          | 0,7624 | 0,0006894  |
| TcCLB.510889.231  | ATP synthase subunit, putative                                | 0,7623 | 6,551E-06  |
| TcCLB.506973.70   | dispersed gene family protein 1 (DGF-1), putative             | 0,7623 | 0,1424     |
| TcCLB.506943.27   | hypothetical protein, conserved                               | 0,7619 | 0,00003349 |
| TcCLB.510543.90   | retrotransposon hot spot (RHS) protein, putative              | 0,7619 | 0,0001745  |
| TcCLB.506885.416  | regulator of chromosome condensation (RCC1), putative         | 0,7618 | 5,911E-13  |
| TcCLB.508651.10   | dispersed gene family protein 1 (DGF-1, pseudogene), putative | 0,7616 | 0,02674    |
| TcCLB.509583.10   | chaperonin TCP20, putative                                    | 0,7614 | 1,972E-18  |
| TcCLB.510187.290  | ATP-dependent DEAD/H RNA helicase, putative (HEL64)           | 0,7608 | 2,509E-21  |
| TcCLB.511249.4    | RNA editing 3' terminal uridylyl transferase 1, putative      | 0,7608 | 3,824E-07  |
| TcCLB.507895.170  | hypothetical protein, conserved                               | 0,7607 | 7,845E-11  |
| TcCLB.508397.79   | hypothetical protein, conserved                               | 0,7607 | 0,001097   |
| TcCLB.509445.39   | glutamate dehydrogenase, putative                             | 0,7606 | 7,18E-14   |
| TcCLB.506401.150  | hypothetical protein, conserved                               | 0,7606 | 9,89E-09   |
| TcCLB.510311.190  | hypothetical protein, conserved                               | 0,7603 | 4,443E-12  |
| TcCLB.509913.24   | dynein light chain 2B, cytoplasmic, putative                  | 0,7602 | 5,878E-11  |
| TcCLB.503437.31   | ATP-dependent DEAD/H RNA helicase (pseudogene), putative      | 0,7601 | 0,02016    |
| TcCLB.509443.20   | mitochondrial RNA binding protein 1, putative                 | 0,76   | 7,706E-15  |
| TcCLB.507477.20   | hypothetical protein, conserved (pseudogene)                  | 0,7592 | 6,976E-16  |
| TcCLB.509551.70   | hypothetical protein, conserved                               | 0,7592 | 1,903E-11  |
| TcCLB.470827.20   | trans-sialidase, putative                                     | 0,7591 | 1,217E-08  |
| TcCLB.412723.9    | dispersed gene family protein 1 (DGF-1), putative (fragment)  | 0,7591 | 0,01761    |
| TcCLB.511825.63   | peptidyl-prolyl cis-trans isomerase, putative                 | 0,7588 | 5,487E-11  |
| TcCLB.504105.110  | hypothetical protein, conserved                               | 0,7585 | 4,312E-22  |
| TcCLB.511807.200  | hypothetical protein, conserved                               | 0,7583 | 5,839E-24  |
| TcCLB.509541.19   | major vault protein, putative                                 | 0,7582 | 3,494E-14  |
| TcCLB.504669.30   | surface protease GP63, putative                               | 0,7581 | 2,016E-10  |
| TcCLB.506511.30   | hypothetical protein, conserved                               | 0,7579 | 1,063E-15  |
| TcCLB.510315.14   | hypothetical protein, conserved                               | 0,7578 | 4,364E-07  |

|                  |                                                               |        |            |
|------------------|---------------------------------------------------------------|--------|------------|
| TcCLB.468041.30  | retrotransposon hot spot protein (RHS, pseudogene), puta      | 0,7577 | 7,039E-18  |
| TcCLB.507897.10  | hypothetical protein, conserved                               | 0,7575 | 3,547E-07  |
| TcCLB.507913.20  | phosphomevalonate kinase protein, putative                    | 0,7574 | 7,999E-10  |
| TcCLB.506297.260 | lanosterol 14-alpha-demethylase, putative (CYP51)             | 0,7572 | 4,53E-19   |
| TcCLB.504181.50  | T-complex protein 1, delta subunit, putative                  | 0,7571 | 7,729E-11  |
| TcCLB.507891.56  | flagellar calcium-binding protein, putative (fragment)        | 0,7566 | 5,739E-09  |
| TcCLB.509965.20  | hypothetical protein                                          | 0,7566 | 1,366E-06  |
| TcCLB.510341.4   | Monoxygenase, putative (fragment)                             | 0,7562 | 5,923E-07  |
| TcCLB.511233.14  | 40S ribosomal protein S27, putative                           | 0,7561 | 1,512E-19  |
| TcCLB.510087.50  | hypothetical protein, conserved                               | 0,7561 | 3,006E-15  |
| TcCLB.510155.160 | protein kinase, putative                                      | 0,756  | 3,748E-18  |
| TcCLB.507875.140 | retrotransposon hot spot protein (RHS, pseudogene), puta      | 0,7557 | 0,0006685  |
| TcCLB.511649.80  | myosin heavy chain, putative                                  | 0,7556 | 1,168E-15  |
| TcCLB.506677.20  | cdc2-related kinase 3, putative (CRK3)                        | 0,7553 | 0,00007763 |
| TcCLB.511281.40  | mevalonate-diphosphate decarboxylase, putative                | 0,7552 | 1,547E-11  |
| TcCLB.509047.80  | mitochondrial oligo_U binding protein TBRGG1 (pseudoge        | 0,7549 | 5,797E-12  |
| TcCLB.508703.25  | hypothetical protein                                          | 0,7543 | 3,014E-10  |
| TcCLB.509455.140 | cyclin, putative                                              | 0,7541 | 5,662E-09  |
| TcCLB.460127.20  | metallo- peptidase, Clan M- Family M48 (FACE1)                | 0,7541 | 8,704E-09  |
| TcCLB.504741.240 | hypothetical protein, conserved                               | 0,7541 | 2,088E-06  |
| TcCLB.507529.30  | hypothetical protein, conserved                               | 0,7537 | 2,302E-15  |
| TcCLB.506907.30  | hypothetical protein, conserved                               | 0,7535 | 7,118E-09  |
| TcCLB.506677.39  | Elongation factor G1, mitochondrial, putative (EF-G1)         | 0,7533 | 4,216E-21  |
| TcCLB.506943.40  | hypothetical protein, conserved                               | 0,7532 | 2,672E-10  |
| TcCLB.511031.10  | hypothetical protein, conserved                               | 0,753  | 0,00007648 |
| TcCLB.507779.20  | trans-sialidase (pseudogene), putative                        | 0,7528 | 0,0002003  |
| TcCLB.507049.65  | hypothetical protein, conserved (pseudogene)                  | 0,7528 | 0,001494   |
| TcCLB.507677.39  | 40S ribosomal protein S3, putative                            | 0,7526 | 5,839E-28  |
| TcCLB.510731.20  | hypothetical protein, conserved                               | 0,7523 | 1,051E-12  |
| TcCLB.503855.20  | spermidine synthase, putative                                 | 0,7515 | 2,937E-16  |
| TcCLB.507611.310 | eukaryotic translation initiation factor 3 subunit 8, putativ | 0,7511 | 3,612E-18  |
| TcCLB.510101.390 | hypothetical protein, conserved                               | 0,7511 | 4,654E-13  |
| TcCLB.510719.35  | ribosomal protein L29, putative                               | 0,7511 | 4,139E-08  |
| TcCLB.509965.50  | hypothetical protein, conserved                               | 0,751  | 0,00002549 |
| TcCLB.511277.240 | vacuolar ATP synthase subunit c, putative                     | 0,7501 | 5,337E-12  |
| TcCLB.506303.171 | hypothetical protein, conserved                               | 0,75   | 0,0219     |
| TcCLB.509789.20  | hypothetical protein                                          | 0,7498 | 2,337E-15  |
| TcCLB.504013.55  | hypothetical protein, conserved                               | 0,7496 | 3,511E-08  |
| TcCLB.504013.100 | ribosomal protein S19, putative                               | 0,7494 | 2,165E-22  |
| TcCLB.511283.124 | mitochondrial carrier protein, putative                       | 0,7492 | 1,251E-11  |
| TcCLB.503939.70  | hypothetical protein                                          | 0,749  | 2,658E-20  |
| TcCLB.510877.180 | GPI transamidase subunit 16, putative (GPI16)                 | 0,749  | 1,887E-17  |
| TcCLB.506391.10  | calmodulin (CALA2)                                            | 0,749  | 6,581E-08  |
| TcCLB.506241.90  | hypothetical protein, conserved                               | 0,7489 | 8,86E-10   |
| TcCLB.504153.200 | hypothetical protein, conserved                               | 0,7488 | 9,721E-08  |

|                  |                                                           |        |            |
|------------------|-----------------------------------------------------------|--------|------------|
| TcCLB.508323.100 | I/6 autoantigen, putative                                 | 0,7486 | 2,747E-07  |
| TcCLB.510415.9   | dispersed gene family protein 1 (DGF-1), putative (fragme | 0,7485 | 0,002635   |
| TcCLB.509033.20  | beta galactofuranosyl glycosyltransferase, putative       | 0,7484 | 2,074E-07  |
| TcCLB.509797.60  | hypothetical protein                                      | 0,7483 | 3,033E-09  |
| TcCLB.509611.170 | hypothetical protein, conserved                           | 0,7482 | 2,97E-11   |
| TcCLB.507513.10  | hypothetical protein, conserved                           | 0,7482 | 1,297E-10  |
| TcCLB.506357.170 | serine/threonine protein phosphatase, putative            | 0,7481 | 2,262E-09  |
| TcCLB.503419.50  | MRB1-associated protein, putative (RGG2)                  | 0,7478 | 1,093E-07  |
| TcCLB.511351.30  | protein kinase, putative                                  | 0,7475 | 1,218E-17  |
| TcCLB.510257.20  | hypothetical protein, conserved                           | 0,7473 | 5,326E-12  |
| TcCLB.509859.70  | hypothetical protein, conserved                           | 0,7473 | 1,841E-11  |
| TcCLB.509153.70  | exosome-associated protein 3, putative (EAP3)             | 0,7472 | 5,236E-12  |
| TcCLB.506775.150 | hypothetical protein, conserved                           | 0,7472 | 1,3E-10    |
| TcCLB.510005.11  | endosomal integral membrane protein (pseudogene), put     | 0,7472 | 1,545E-08  |
| TcCLB.414243.10  | hypothetical protein, conserved                           | 0,7472 | 1,381E-06  |
| TcCLB.506961.50  | dispersed gene family protein 1 (DGF-1), putative         | 0,7471 | 5,443E-08  |
| TcCLB.511821.179 | hypothetical protein, conserved                           | 0,7469 | 7,032E-13  |
| TcCLB.510357.60  | hypothetical protein, conserved                           | 0,7469 | 0,0001434  |
| TcCLB.504797.100 | 35 kDa cyclophilin, putative (CYP35)                      | 0,7467 | 1,537E-08  |
| TcCLB.507693.5   | tryptophanyl-tRNA synthetase, putative (fragment)         | 0,7467 | 2,948E-07  |
| TcCLB.510053.10  | hypothetical protein, conserved                           | 0,7466 | 0,00000865 |
| TcCLB.507077.50  | hypothetical protein, conserved                           | 0,7465 | 2,035E-07  |
| TcCLB.511807.280 | hypothetical protein, conserved                           | 0,7464 | 5,357E-31  |
| TcCLB.510285.74  | hypothetical protein, conserved                           | 0,7464 | 4,557E-07  |
| TcCLB.508267.30  | hypothetical protein, conserved                           | 0,746  | 1,089E-11  |
| TcCLB.508307.70  | hypothetical protein, conserved                           | 0,7459 | 3,956E-09  |
| TcCLB.504107.10  | calpain-like cysteine peptidase, putative (fragment)      | 0,7459 | 0,06242    |
| TcCLB.506227.110 | hypothetical protein, conserved                           | 0,7458 | 8,397E-09  |
| TcCLB.508267.20  | hypothetical protein, conserved                           | 0,7453 | 5,461E-19  |
| TcCLB.507129.30  | C-14 sterol reductase, putative                           | 0,7452 | 6,674E-12  |
| TcCLB.508683.9   | dispersed gene family protein 1 (DGF-1), putative         | 0,7451 | 0,02536    |
| TcCLB.504147.99  | hypothetical protein                                      | 0,7443 | 1,973E-17  |
| TcCLB.511889.20  | retrotransposon hot spot protein (RHS, pseudogene), puta  | 0,7443 | 4,284E-10  |
| TcCLB.508919.130 | hypothetical protein, conserved                           | 0,7442 | 1,037E-10  |
| TcCLB.452699.30  | dispersed gene family protein 1 (DGF-1), putative         | 0,744  | 0,03943    |
| TcCLB.506825.10  | RNA-binding protein, putative                             | 0,744  | 0,09059    |
| TcCLB.509529.19  | dispersed gene family protein 1 (DGF-1), putative (fragme | 0,7438 | 0,00000127 |
| TcCLB.510575.130 | chloride channel protein, putative                        | 0,7432 | 1,269E-17  |
| TcCLB.509125.20  | ATP-dependent Clp protease subunit, heat shock protein 7  | 0,7431 | 3,318E-15  |
| TcCLB.508881.140 | hypothetical protein                                      | 0,7429 | 5,898E-14  |
| TcCLB.511385.100 | hypothetical protein, conserved                           | 0,7429 | 1,429E-12  |
| TcCLB.504061.10  | retrotransposon hot spot protein (RHS, pseudogene), puta  | 0,7429 | 1,765E-11  |
| TcCLB.505193.70  | hypothetical protein, conserved                           | 0,7428 | 1,047E-10  |
| TcCLB.506349.47  | retrotransposon hot spot protein (RHS, pseudogene), puta  | 0,7427 | 0,001767   |
| TcCLB.504163.80  | hypothetical protein, conserved                           | 0,7424 | 9,43E-11   |

|                  |                                                           |        |            |
|------------------|-----------------------------------------------------------|--------|------------|
| TcCLB.506405.100 | hypothetical protein, conserved                           | 0,742  | 1,262E-19  |
| TcCLB.506561.10  | helicase-like protein, putative                           | 0,742  | 1,218E-13  |
| TcCLB.503827.94  | chitin binding-like protein (pseudogene), putative        | 0,742  | 0,0753     |
| TcCLB.503757.20  | hypothetical protein, conserved                           | 0,7419 | 1,168E-06  |
| TcCLB.510307.180 | glycine dehydrogenase [decarboxylating] (pseudogene), p   | 0,7417 | 4,551E-12  |
| TcCLB.510303.210 | 2,4-dienoyl-coa reductase-like protein, putative          | 0,7414 | 1,45E-23   |
| TcCLB.508287.10  | dispersed gene family protein 1 (DGF-1), putative         | 0,7413 | 0,05787    |
| TcCLB.511765.20  | dispersed gene family protein 1 (DGF-1), putative         | 0,7412 | 0,00002884 |
| TcCLB.509937.100 | ubiquitin/ribosomal protein S27a, putative                | 0,7411 | 1,086E-29  |
| TcCLB.511661.60  | hypothetical protein, conserved                           | 0,7411 | 7,682E-09  |
| TcCLB.511077.30  | retrotransposon hot spot protein (RHS, pseudogene), puta  | 0,7411 | 0,0005033  |
| TcCLB.485845.9   | dispersed gene family protein 1 (DGF-1), putative (fragme | 0,7411 | 0,134      |
| TcCLB.510309.50  | 60S acidic ribosomal protein P2, putative                 | 0,7408 | 4,259E-14  |
| TcCLB.508845.9   | dispersed gene family protein 1 (DGF-1), putative         | 0,7408 | 0,01791    |
| TcCLB.510465.150 | dispersed gene family protein 1 (DGF-1), putative         | 0,7408 | 0,01994    |
| TcCLB.503639.10  | inositol-3-phosphate synthase, putative                   | 0,7407 | 1,966E-07  |
| TcCLB.504189.10  | beta galactofuranosyl glycosyltransferase (pseudogene), p | 0,7405 | 0,02487    |
| TcCLB.510001.59  | hypothetical protein, conserved (fragment)                | 0,7404 | 2,285E-16  |
| TcCLB.506171.50  | retrotransposon hot spot protein (RHS, pseudogene), puta  | 0,7404 | 1,316E-07  |
| TcCLB.507835.70  | dispersed gene family protein 1 (DGF-1), putative         | 0,7403 | 0,00003448 |
| TcCLB.509597.29  | hypothetical protein, conserved                           | 0,7402 | 1,053E-08  |
| TcCLB.507583.4   | hypothetical protein, conserved (fragment)                | 0,7402 | 0,0001391  |
| TcCLB.506401.70  | vacuolar protein sorting protein 18, putative             | 0,7401 | 2,465E-16  |
| TcCLB.509643.120 | hypothetical protein, conserved                           | 0,7401 | 1,17E-10   |
| TcCLB.507055.10  | hypothetical protein, conserved                           | 0,7401 | 0,00009294 |
| TcCLB.505999.50  | hypothetical protein, conserved                           | 0,7399 | 1,598E-06  |
| TcCLB.503493.10  | hypothetical protein, conserved                           | 0,7397 | 2,352E-09  |
| TcCLB.504797.10  | acidocalcisomal exopolyphosphatase, putative              | 0,7391 | 4,121E-09  |
| TcCLB.508457.30  | lipoic acid containing carrier protein, putative (GCVH)   | 0,7389 | 4,975E-12  |
| TcCLB.507499.56  | N-acetyltransferase complex ARD1 subunit (pseudogene),    | 0,7387 | 0,05734    |
| TcCLB.509671.70  | ribosomal protein L15, putative                           | 0,7386 | 5,583E-25  |
| TcCLB.506825.210 | hypothetical protein, conserved                           | 0,7385 | 1,76E-17   |
| TcCLB.511733.70  | hypothetical protein, conserved                           | 0,7385 | 1,018E-06  |
| TcCLB.509017.60  | hypothetical protein, conserved                           | 0,7382 | 1,741E-13  |
| TcCLB.506553.30  | GTP-binding protein, putative                             | 0,7379 | 2,238E-12  |
| TcCLB.508163.190 | dispersed gene family protein 1 (DGF-1), putative         | 0,7379 | 0,002736   |
| TcCLB.510533.120 | translation initiation factor IF-2, putative              | 0,7378 | 2,316E-13  |
| TcCLB.508741.220 | hypothetical protein                                      | 0,7377 | 5,302E-14  |
| TcCLB.456139.10  | hypothetical protein, conserved                           | 0,7376 | 0,0002305  |
| TcCLB.511871.40  | hypothetical protein, conserved                           | 0,7372 | 8,157E-08  |
| TcCLB.509615.10  | hypothetical protein, conserved                           | 0,7372 | 1,152E-07  |
| TcCLB.510629.410 | hypothetical protein, conserved                           | 0,737  | 0,00006869 |
| TcCLB.508153.280 | 60S ribosomal protein L13, putative                       | 0,7368 | 2,018E-21  |
| TcCLB.507963.30  | hypothetical protein, conserved                           | 0,7367 | 2,115E-19  |
| TcCLB.508299.40  | hypothetical protein                                      | 0,7362 | 3,593E-10  |

|                  |                                                            |        |            |
|------------------|------------------------------------------------------------|--------|------------|
| TcCLB.510685.30  | RNA polymerase IIA largest subunit, putative               | 0,7358 | 2,677E-14  |
| TcCLB.506507.60  | retrotransposon hot spot protein (RHS, pseudogene), puta   | 0,7358 | 2,422E-09  |
| TcCLB.507211.20  | protein kinase, putative                                   | 0,7358 | 0,002617   |
| TcCLB.508949.20  | hypothetical protein, conserved                            | 0,7352 | 0,000485   |
| TcCLB.510629.420 | protein phosphatase 1, regulatory subunit, putative        | 0,7347 | 5,96E-10   |
| TcCLB.507079.30  | multidrug resistance protein E, putative                   | 0,7347 | 0,0002692  |
| TcCLB.511693.30  | hypothetical protein, conserved                            | 0,7341 | 3,552E-19  |
| TcCLB.508087.20  | retrotransposon hot spot protein (RHS, pseudogene), puta   | 0,734  | 3,964E-14  |
| TcCLB.510579.80  | 60S ribosomal protein L10, putative                        | 0,7337 | 7,234E-18  |
| TcCLB.507443.14  | RNA polymerase IIA largest subunit, putative (fragment)    | 0,7337 | 3,045E-08  |
| TcCLB.505975.10  | hypothetical protein                                       | 0,7337 | 0,1332     |
| TcCLB.510323.30  | 60S ribosomal protein L13, putative                        | 0,7335 | 2,037E-18  |
| TcCLB.504225.10  | hypothetical protein, conserved                            | 0,7334 | 6,704E-11  |
| TcCLB.506791.70  | nitroreductase                                             | 0,7333 | 3,467E-11  |
| TcCLB.503449.14  | hypothetical protein, conserved                            | 0,7333 | 2,874E-09  |
| TcCLB.511139.20  | 40S ribosomal protein S11, putative                        | 0,7326 | 6,02E-24   |
| TcCLB.506957.90  | 60S ribosomal protein L18a, putative                       | 0,7323 | 2,012E-27  |
| TcCLB.509221.10  | retrotransposon hot spot protein (RHS, pseudogene), puta   | 0,7323 | 9,594E-12  |
| TcCLB.511479.20  | hypothetical protein, conserved                            | 0,7323 | 1,584E-11  |
| TcCLB.506171.20  | hypothetical protein, conserved (pseudogene)               | 0,7323 | 3,195E-07  |
| TcCLB.511293.80  | hypothetical protein, conserved                            | 0,7322 | 3,002E-09  |
| TcCLB.510459.30  | dispersed gene family protein 1 (DGF-1), putative          | 0,7321 | 0,02929    |
| TcCLB.508393.9   | dispersed gene family protein 1 (DGF-1), putative          | 0,7321 | 0,2099     |
| TcCLB.510689.14  | NADH-ubiquinone oxidoreductase complex I subunit, puta     | 0,732  | 3,451E-10  |
| TcCLB.511821.160 | microtubial binding protein, putative                      | 0,732  | 0,00003542 |
| TcCLB.510055.70  | hypothetical protein, conserved                            | 0,7315 | 3,019E-11  |
| TcCLB.506865.4   | hypothetical protein, conserved                            | 0,7315 | 9,726E-06  |
| TcCLB.508153.490 | peptidyl-prolyl cis-trans isomerase NIMA-interacting 4, pu | 0,7314 | 0,00007382 |
| TcCLB.504797.40  | thioredoxin, putative                                      | 0,7313 | 7,743E-10  |
| TcCLB.505763.19  | P-type H -ATPase, putative                                 | 0,7312 | 1,149E-22  |
| TcCLB.509767.150 | hypothetical protein, conserved                            | 0,7312 | 1,958E-11  |
| TcCLB.506495.20  | helicase-like protein, putative                            | 0,7307 | 8,128E-14  |
| TcCLB.504769.160 | dispersed gene family protein 1 (DGF-1), putative          | 0,7306 | 0,00009283 |
| TcCLB.511517.120 | hypothetical protein, conserved                            | 0,7305 | 2,859E-15  |
| TcCLB.475169.10  | DNA-directed RNA polymerase II subunit 2 (pseudogene),     | 0,7305 | 0,00006943 |
| TcCLB.511277.270 | tubulin cofactor C domain-containing protein RP2, putativ  | 0,7297 | 4,797E-13  |
| TcCLB.504797.140 | CLC-type chloride channel, putative                        | 0,7296 | 7,131E-20  |
| TcCLB.508285.40  | retrotransposon hot spot protein (RHS, pseudogene), puta   | 0,7296 | 0,0139     |
| TcCLB.509533.30  | retrotransposon hot spot protein (RHS, pseudogene), puta   | 0,7295 | 1,05E-08   |
| TcCLB.511181.100 | 60S ribosomal protein L8, putative                         | 0,7291 | 1,318E-24  |
| TcCLB.508541.170 | hypothetical protein, conserved                            | 0,7288 | 0,000023   |
| TcCLB.504021.109 | 40S ribosomal protein S3, putative                         | 0,7285 | 1,224E-23  |
| TcCLB.503865.50  | ankyrin, putative                                          | 0,7284 | 1,816E-13  |
| TcCLB.509127.10  | ATP-dependent Clp protease subunit, heat shock protein 7   | 0,7281 | 4,015E-10  |
| TcCLB.510857.50  | lipocate-protein ligase, putative                          | 0,7281 | 4,651E-09  |

|                  |                                                           |        |            |
|------------------|-----------------------------------------------------------|--------|------------|
| TcCLB.503951.10  | retrotransposon hot spot protein (RHS, pseudogene), puta  | 0,7281 | 0,006183   |
| TcCLB.510233.20  | hypothetical protein                                      | 0,7279 | 0,02926    |
| TcCLB.509353.30  | 40S ribosomal protein S3, putative                        | 0,7277 | 5,253E-20  |
| TcCLB.504817.9   | hypothetical protein, conserved (fragment)                | 0,7269 | 0,002796   |
| TcCLB.510293.40  | ubiquitin/ribosomal protein S27a, putative                | 0,7268 | 0,000435   |
| TcCLB.510897.80  | hypothetical protein, conserved                           | 0,7267 | 0,00002121 |
| TcCLB.506691.40  | hypothetical protein, conserved                           | 0,7266 | 2,783E-07  |
| TcCLB.506779.44  | hypothetical protein, conserved                           | 0,7265 | 0,00001829 |
| TcCLB.506163.35  | hypothetical protein, conserved                           | 0,7262 | 0,00001238 |
| TcCLB.508141.50  | hypothetical protein, conserved                           | 0,7261 | 0,00001012 |
| TcCLB.509303.20  | glycine dehydrogenase [decarboxylating] (pseudogene), pu  | 0,726  | 0,00006452 |
| TcCLB.506533.106 | mucin TcSMUGL, putative                                   | 0,7258 | 2,55E-10   |
| TcCLB.503931.30  | hypothetical protein                                      | 0,7257 | 3,048E-09  |
| TcCLB.511417.100 | anti-silencing protein ASF 1, putative                    | 0,7257 | 0,0001825  |
| TcCLB.509253.30  | 3-Beta-hydroxysteroid-delta(8), delta(7)-isomerase, putat | 0,7253 | 7,211E-08  |
| TcCLB.506201.80  | serine/threonine-protein phosphatase PP1, putative        | 0,7253 | 0,0008207  |
| TcCLB.506933.20  | ribonucleoside-diphosphate reductase large chain, putativ | 0,725  | 3,463E-14  |
| TcCLB.506435.460 | hypothetical protein                                      | 0,725  | 1,999E-09  |
| TcCLB.504949.30  | succinate dehydrogenase iron-sulfur subunit (SDH2C)       | 0,7249 | 7,436E-08  |
| TcCLB.511421.190 | ESCO acetyltransferase domain-containing protein          | 0,7247 | 2,813E-09  |
| TcCLB.508851.130 | hypothetical protein                                      | 0,7241 | 5,115E-16  |
| TcCLB.507011.150 | hypothetical protein, conserved                           | 0,724  | 2,865E-07  |
| TcCLB.505207.40  | dispersed gene family protein 1 (DGF-1), putative         | 0,724  | 0,0003386  |
| TcCLB.510091.119 | calpain-like cysteine peptidase (pseudogene), putative    | 0,7239 | 4,108E-07  |
| TcCLB.508221.830 | hypothetical protein, conserved (pseudogene)              | 0,7231 | 0,03418    |
| TcCLB.510359.220 | hypothetical protein, conserved                           | 0,7229 | 1,036E-12  |
| TcCLB.508307.200 | hypothetical protein, conserved                           | 0,7227 | 5,018E-09  |
| TcCLB.508153.60  | metallo-peptidase, Clan MA(E) Family M1                   | 0,7226 | 3,404E-15  |
| TcCLB.507063.120 | hypothetical protein, conserved                           | 0,7224 | 2,235E-06  |
| TcCLB.507739.59  | hypothetical protein, conserved                           | 0,7218 | 0,00001381 |
| TcCLB.509127.97  | hypothetical protein, conserved                           | 0,7216 | 4,109E-08  |
| TcCLB.507519.260 | retrotransposon hot spot protein (RHS, pseudogene), puta  | 0,7215 | 1,073E-13  |
| TcCLB.508153.454 | hypothetical protein, conserved                           | 0,7215 | 2,928E-09  |
| TcCLB.511727.140 | phenylalanyl-tRNA synthetase alpha chain, putative        | 0,7213 | 8,754E-26  |
| TcCLB.506779.160 | palmitoyl acyltransferase 9, putative                     | 0,7213 | 4,985E-11  |
| TcCLB.506025.60  | 2-oxoglutarate dehydrogenase, E2 component, dihydrolipic  | 0,721  | 3,233E-18  |
| TcCLB.511635.10  | histone H2B, putative                                     | 0,7209 | 3,332E-17  |
| TcCLB.506975.70  | hypothetical protein                                      | 0,7208 | 0,0002935  |
| TcCLB.511189.30  | 40S ribosomal protein S13, putative                       | 0,7206 | 4,042E-18  |
| TcCLB.503465.20  | hypothetical protein, conserved (pseudogene)              | 0,7205 | 3,662E-06  |
| TcCLB.509871.80  | dispersed gene family protein 1 (DGF-1), putative         | 0,7204 | 0,000015   |
| TcCLB.508879.40  | hypothetical protein, conserved                           | 0,7202 | 5,706E-12  |
| TcCLB.447483.10  | hypothetical protein, conserved                           | 0,7198 | 4,344E-11  |
| TcCLB.510873.10  | NAD(P)-dependent steroid dehydrogenase protein, putativ   | 0,7194 | 4,118E-20  |
| TcCLB.510403.50  | retrotransposon hot spot protein (RHS, pseudogene), puta  | 0,7194 | 1,93E-15   |

|                  |                                                          |        |            |
|------------------|----------------------------------------------------------|--------|------------|
| TcCLB.506591.4   | heat shock protein 90, putative (LPG3)                   | 0,7189 | 1,241E-11  |
| TcCLB.509807.29  | hypothetical protein, conserved                          | 0,7188 | 1,134E-06  |
| TcCLB.506813.120 | retrotransposon hot spot protein (RHS, pseudogene), puta | 0,7188 | 0,0005332  |
| TcCLB.508647.264 | hypothetical protein, conserved                          | 0,7182 | 2,177E-15  |
| TcCLB.504003.70  | S-adenosyl-methyltransferase mraW-like protein, putativ  | 0,7181 | 1,017E-14  |
| TcCLB.507875.10  | hypothetical protein, conserved                          | 0,7181 | 9,352E-09  |
| TcCLB.504121.30  | 60S ribosomal protein L4, putative                       | 0,7179 | 9,968E-18  |
| TcCLB.510285.60  | ubiquinone biosynthesis methyltransferase, putative      | 0,7177 | 2,353E-13  |
| TcCLB.506989.20  | hypothetical protein, conserved                          | 0,7177 | 2,92E-12   |
| TcCLB.510769.100 | hypothetical protein, conserved                          | 0,7177 | 3,342E-10  |
| TcCLB.508577.130 | hypothetical protein, conserved                          | 0,7176 | 3,688E-11  |
| TcCLB.509437.100 | retrotransposon hot spot protein (RHS, pseudogene), puta | 0,7175 | 4,973E-06  |
| TcCLB.506401.250 | hypothetical protein, conserved                          | 0,7173 | 3,064E-20  |
| TcCLB.506211.40  | intraflagellar transport protein 52, putative (IFT52)    | 0,7173 | 9,732E-19  |
| TcCLB.504867.20  | ABC transporter, putative                                | 0,7173 | 1,354E-16  |
| TcCLB.510205.70  | surface protease GP63, putative                          | 0,7172 | 0,04457    |
| TcCLB.507083.50  | hypothetical protein, conserved                          | 0,7169 | 5,771E-07  |
| TcCLB.511263.40  | hypothetical protein, conserved                          | 0,7167 | 0,08686    |
| TcCLB.508153.770 | hypothetical protein, conserved                          | 0,7165 | 5,519E-13  |
| TcCLB.510741.190 | hypothetical protein, conserved (pseudogene)             | 0,716  | 7,365E-10  |
| TcCLB.506683.100 | retrotransposon hot spot protein (RHS, pseudogene), puta | 0,7159 | 0,00006221 |
| TcCLB.506859.80  | hypothetical protein, conserved                          | 0,7158 | 5,816E-15  |
| TcCLB.510303.220 | hypothetical protein, conserved                          | 0,7156 | 1,02E-15   |
| TcCLB.503665.10  | trans-sialidase (pseudogene), putative                   | 0,7154 | 0,03229    |
| TcCLB.509105.10  | hypothetical protein, conserved                          | 0,7147 | 1,016E-10  |
| TcCLB.510749.20  | hypothetical protein, conserved                          | 0,7146 | 8,036E-10  |
| TcCLB.510663.19  | 60S ribosomal subunit protein L31, putative              | 0,7144 | 3,961E-09  |
| TcCLB.509177.10  | hypothetical protein, conserved                          | 0,7139 | 1,622E-07  |
| TcCLB.511499.40  | hypothetical protein, conserved                          | 0,7139 | 6,245E-06  |
| TcCLB.510513.80  | bilobe protein, conserved                                | 0,7137 | 1,265E-12  |
| TcCLB.506635.50  | hypothetical protein                                     | 0,7133 | 3,24E-14   |
| TcCLB.508919.189 | dispersed gene family protein 1 (DGF-1), putative        | 0,7133 | 0,00000464 |
| TcCLB.507167.259 | trans-sialidase (pseudogene), putative                   | 0,7131 | 0,00325    |
| TcCLB.509979.51  | zinc carboxypeptidase, putative                          | 0,713  | 0,03456    |
| TcCLB.510609.34  | hypothetical protein, conserved                          | 0,7128 | 6,724E-08  |
| TcCLB.507167.31  | N-acetyltransferase complex ARD1 subunit (pseudogene),   | 0,7126 | 0,07872    |
| TcCLB.508207.100 | 60S ribosomal protein L7, putative                       | 0,7124 | 7,026E-25  |
| TcCLB.507813.10  | structural maintenance of chromosome 3 protein, putativ  | 0,7117 | 9,017E-06  |
| TcCLB.508661.20  | ubiquitin/ribosomal protein S27a, putative               | 0,7116 | 7,903E-18  |
| TcCLB.506295.200 | retrotransposon hot spot protein (RHS, pseudogene), puta | 0,7114 | 7,189E-09  |
| TcCLB.508179.60  | protein kinase, putative                                 | 0,7113 | 1,037E-10  |
| TcCLB.506529.130 | WD repeat and HMG-box DNA-binding protein, putative      | 0,7108 | 3,009E-15  |
| TcCLB.506041.20  | hypothetical protein, conserved                          | 0,7107 | 1,743E-10  |
| TcCLB.507603.110 | hypothetical protein, conserved                          | 0,7106 | 3,892E-09  |
| TcCLB.506351.80  | oligopeptidase B-like protein, putative                  | 0,7101 | 2,107E-10  |

|                   |                                                            |        |            |
|-------------------|------------------------------------------------------------|--------|------------|
| TcCLB.510187.460  | hypothetical protein                                       | 0,7096 | 6,864E-08  |
| TcCLB.509139.20   | hypothetical protein, conserved                            | 0,7094 | 6,602E-11  |
| TcCLB.506355.50   | chaperone DNAJ protein, putative                           | 0,7093 | 7,726E-17  |
| TcCLB.504427.250  | ubiquitin-activating enzyme E1, putative                   | 0,7089 | 2,815E-24  |
| TcCLB.509803.60   | retrotransposon hot spot protein (RHS, pseudogene), puta   | 0,7088 | 0,007665   |
| TcCLB.504049.20   | retrotransposon hot spot protein (RHS, pseudogene), puta   | 0,7086 | 1,366E-13  |
| TcCLB.510903.50   | phosphonopyruvate decarboxylase, putative                  | 0,7086 | 1,298E-09  |
| TcCLB.507513.50   | heat shock 70 kDa protein, putative                        | 0,7083 | 1,022E-16  |
| TcCLB.510963.50   | 6-phosphofructo-2-kinase/fructose-2,6-bisphosphatas, pu    | 0,7083 | 2,497E-11  |
| TcCLB.504605.10   | retrotransposon hot spot (RHS) protein, putative (fragmer  | 0,7083 | 5,143E-07  |
| TcCLB.509167.50   | hypothetical protein                                       | 0,7082 | 2,568E-06  |
| TcCLB.508881.50   | hypothetical protein, conserved                            | 0,7079 | 1,746E-08  |
| TcCLB.505809.10   | dispersed gene family protein 1 (DGF-1, pseudogene), put   | 0,7077 | 0,166      |
| TcCLB.508461.500  | 60S ribosomal protein L27A/L29, putative                   | 0,7076 | 0,00003258 |
| TcCLB.507681.10   | hypothetical protein, conserved                            | 0,7073 | 0,001837   |
| TcCLB.508221.610  | elongation factor 1-gamma (EF-1-gamma), putative           | 0,7072 | 0,0876     |
| TcCLB.511019.90   | iron superoxide dismutase, putative                        | 0,7071 | 1,719E-13  |
| TcCLB.503665.15   | trans-sialidase (pseudogene), putative                     | 0,7071 | 7,725E-07  |
| TcCLB.511661.50   | small ubiquitin protein, putative                          | 0,7067 | 0,00000859 |
| TcCLB.506363.100  | hypothetical protein, conserved                            | 0,7065 | 2,793E-11  |
| TcCLB.509505.80   | hypothetical protein, conserved                            | 0,7065 | 2,084E-10  |
| TcCLB.508153.1140 | hypothetical protein, conserved                            | 0,7065 | 2,467E-08  |
| TcCLB.508781.20   | ATP synthase, putative                                     | 0,7061 | 6,427E-14  |
| TcCLB.503879.110  | hypothetical protein, conserved                            | 0,706  | 1,136E-14  |
| TcCLB.506947.110  | myosin heavy chain (pseudogene), putative                  | 0,706  | 7,286E-12  |
| TcCLB.506635.70   | hypothetical protein, conserved                            | 0,7059 | 1,09E-13   |
| TcCLB.511499.59   | small nuclear ribonucleoprotein Sm-E, putative             | 0,7058 | 2,452E-06  |
| TcCLB.509151.10   | hypothetical protein, conserved                            | 0,7057 | 4,023E-09  |
| TcCLB.506357.199  | hypothetical protein, conserved                            | 0,7055 | 1,577E-15  |
| TcCLB.503525.10   | hypothetical protein, conserved                            | 0,7055 | 7,295E-10  |
| TcCLB.504797.110  | hypothetical protein, conserved                            | 0,7054 | 2,182E-15  |
| TcCLB.506747.20   | dihydroorotase, putative                                   | 0,7054 | 0,00000658 |
| TcCLB.509023.100  | catalytic subunit of the vacuolar transporter chaperone 4, | 0,7048 | 1,745E-10  |
| TcCLB.506559.59   | ubiquitin, putative                                        | 0,7048 | 2,279E-08  |
| TcCLB.508737.187  | hypothetical protein, conserved                            | 0,7045 | 1,665E-09  |
| TcCLB.509875.260  | hypothetical protein, conserved                            | 0,7045 | 0,00001343 |
| TcCLB.506633.80   | hypothetical protein, conserved                            | 0,7044 | 4,971E-12  |
| TcCLB.504933.20   | hypothetical protein                                       | 0,7042 | 5,488E-12  |
| TcCLB.460127.30   | amino acid permease, putative                              | 0,7042 | 0,0005601  |
| TcCLB.507991.130  | hypothetical protein, conserved                            | 0,704  | 8,186E-08  |
| TcCLB.509671.120  | rRNA processing protein, putative                          | 0,7037 | 1,152E-08  |
| TcCLB.506559.290  | hypothetical protein, conserved                            | 0,7036 | 1,127E-12  |
| TcCLB.506411.30   | proline oxidase, putative                                  | 0,7035 | 6,137E-08  |
| TcCLB.510759.54   | hypothetical protein                                       | 0,7035 | 0,00006147 |
| TcCLB.504105.130  | Flagellum surface protein 179 (FS179)                      | 0,7033 | 6,579E-12  |



|                  |                                                           |        |            |
|------------------|-----------------------------------------------------------|--------|------------|
| TcCLB.508265.30  | hypothetical protein                                      | 0,7033 | 2,047E-10  |
| TcCLB.503487.70  | hypothetical protein, conserved                           | 0,7031 | 3,231E-15  |
| TcCLB.503967.10  | hypothetical protein, conserved                           | 0,7031 | 7,977E-08  |
| TcCLB.508859.80  | hypothetical protein, conserved                           | 0,7031 | 6,83E-07   |
| TcCLB.508409.199 | hypothetical protein, conserved                           | 0,7028 | 6,78E-07   |
| TcCLB.505843.20  | 60S ribosomal protein L6, putative                        | 0,702  | 1,379E-16  |
| TcCLB.510167.10  | phosphatidylinositol 3-kinase 2, putative                 | 0,7018 | 5,93E-14   |
| TcCLB.508439.40  | hypothetical protein                                      | 0,7017 | 0,131      |
| TcCLB.509331.150 | permease-like protein, putative                           | 0,7016 | 0,0001585  |
| TcCLB.509693.180 | hypothetical protein, conserved                           | 0,7015 | 1,801E-06  |
| TcCLB.507627.20  | proton motive ATPase 1, putative                          | 0,7014 | 1,825E-16  |
| TcCLB.508421.30  | tryptophanyl-tRNA synthetase (pseudogene), putative       | 0,7013 | 2,684E-21  |
| TcCLB.504141.9   | calcium-translocating P-type ATPase, putative             | 0,7013 | 4,005E-06  |
| TcCLB.510855.40  | proteasome regulatory non-ATPase subunit, putative        | 0,7012 | 8,139E-12  |
| TcCLB.510155.90  | hypothetical protein, conserved                           | 0,7011 | 2,185E-19  |
| TcCLB.508873.90  | trans-sialidase (pseudogene), putative                    | 0,7011 | 0,01462    |
| TcCLB.510721.10  | hypothetical protein, conserved                           | 0,701  | 8,006E-17  |
| TcCLB.510575.200 | chaperone DNAJ protein, putative                          | 0,7008 | 1,196E-15  |
| TcCLB.510859.50  | hypothetical protein, conserved                           | 0,7007 | 4,599E-08  |
| TcCLB.508325.340 | glycine dehydrogenase [decarboxylating] (pseudogene), p   | 0,7006 | 8,486E-10  |
| TcCLB.508713.10  | hypothetical protein, conserved                           | 0,7004 | 1,186E-18  |
| TcCLB.510431.150 | glycosomal transporter (GAT2), putative (GAT2)            | 0,7002 | 1,146E-22  |
| TcCLB.507143.20  | hypothetical protein, conserved                           | 0,6999 | 5,833E-09  |
| TcCLB.509161.140 | hypothetical protein, conserved                           | 0,6998 | 6,611E-10  |
| TcCLB.511361.4   | hypothetical protein, conserved                           | 0,6998 | 0,02706    |
| TcCLB.507709.120 | hypothetical protein, conserved                           | 0,6997 | 1,723E-20  |
| TcCLB.503683.20  | hypothetical protein, conserved                           | 0,6994 | 5,792E-13  |
| TcCLB.509611.189 | hypothetical protein, conserved                           | 0,6992 | 2,838E-14  |
| TcCLB.433677.19  | hypothetical protein, conserved                           | 0,6992 | 0,0009224  |
| TcCLB.506921.20  | hypothetical protein, conserved                           | 0,6991 | 4,868E-12  |
| TcCLB.506045.19  | dispersed gene family protein 1 (DGF-1), putative (fragmε | 0,699  | 0,0001254  |
| TcCLB.507089.110 | hypothetical protein, conserved                           | 0,6989 | 2,427E-09  |
| TcCLB.511737.70  | hypothetical protein, conserved                           | 0,6985 | 2,771E-06  |
| TcCLB.506171.35  | ATP-dependent DEAD/H RNA helicase (pseudogene), puta      | 0,6982 | 0,02497    |
| TcCLB.510105.200 | hypothetical protein, conserved                           | 0,6975 | 4,199E-21  |
| TcCLB.503733.70  | phosphoacetylglucosamine mutase, putative                 | 0,6971 | 4,568E-07  |
| TcCLB.504797.34  | N-acetyltransferase, putative                             | 0,697  | 4,892E-17  |
| TcCLB.503431.50  | hypothetical protein, conserved                           | 0,6959 | 0,00001449 |
| TcCLB.509879.20  | hypothetical protein, conserved                           | 0,6958 | 2,936E-07  |
| TcCLB.507275.24  | ubiquitin fold modifier protein, putative (UFM1)          | 0,6958 | 6,189E-06  |
| TcCLB.506717.140 | retrotransposon hot spot protein (RHS, pseudogene), puta  | 0,6958 | 0,008506   |
| TcCLB.510857.40  | RNA-editing complex protein, putative                     | 0,6957 | 1,995E-12  |
| TcCLB.507615.40  | hypothetical protein, conserved                           | 0,6954 | 4,872E-16  |
| TcCLB.507491.30  | hypothetical protein, conserved                           | 0,6954 | 2,905E-09  |
| TcCLB.510201.50  | dispersed gene family protein 1 (DGF-1), putative         | 0,6952 | 0,000112   |

|                  |                                                           |        |            |
|------------------|-----------------------------------------------------------|--------|------------|
| TcCLB.504147.80  | metallo-peptidase, Clan MA(E) Family M3                   | 0,6949 | 5,985E-22  |
| TcCLB.510101.190 | hypothetical protein, conserved                           | 0,6949 | 2,384E-09  |
| TcCLB.508707.280 | hypothetical protein, conserved                           | 0,6948 | 0,00000343 |
| TcCLB.510339.60  | hypothetical protein, conserved                           | 0,6947 | 2,156E-07  |
| TcCLB.508817.119 | hypothetical protein, conserved                           | 0,6947 | 2,511E-07  |
| TcCLB.511185.130 | dispersed gene family protein 1 (DGF-1), putative         | 0,6947 | 0,03393    |
| TcCLB.509767.120 | hypothetical protein, conserved                           | 0,6946 | 2,232E-10  |
| TcCLB.510719.210 | hypothetical protein, conserved                           | 0,6946 | 4,349E-08  |
| TcCLB.510729.100 | hypothetical protein, conserved                           | 0,6945 | 2,749E-13  |
| TcCLB.453445.20  | ubiquitin-conjugating enzyme E2, putative                 | 0,6945 | 1,828E-09  |
| TcCLB.510719.20  | short-chain dehydrogenase, putative                       | 0,6945 | 5,236E-09  |
| TcCLB.510423.50  | hypothetical protein, conserved                           | 0,6944 | 4,366E-12  |
| TcCLB.508567.20  | hypothetical protein, conserved                           | 0,694  | 3,497E-06  |
| TcCLB.510241.60  | nascent polypeptide associated complex subunit, putative  | 0,6935 | 5,888E-24  |
| TcCLB.507997.80  | hypothetical protein, conserved                           | 0,6935 | 0,0007682  |
| TcCLB.506441.20  | hypothetical protein, conserved                           | 0,6931 | 4,173E-11  |
| TcCLB.511825.210 | dephospho-CoA kinase, putative                            | 0,6929 | 5,821E-09  |
| TcCLB.503447.40  | retrotransposon hot spot (RHS) protein, putative          | 0,6926 | 0,00008106 |
| TcCLB.507999.10  | dispersed gene family protein 1 (DGF-1), putative         | 0,6925 | 1,564E-08  |
| TcCLB.511459.60  | hypothetical protein, conserved                           | 0,6925 | 0,00002735 |
| TcCLB.507011.10  | hypothetical protein, conserved                           | 0,6924 | 1,759E-10  |
| TcCLB.509741.20  | hypothetical protein, conserved                           | 0,6922 | 5,012E-07  |
| TcCLB.506195.170 | hypothetical protein, conserved                           | 0,6919 | 8,293E-13  |
| TcCLB.504421.10  | serine/threonine protein kinase, putative                 | 0,6917 | 4,891E-24  |
| TcCLB.507317.40  | hypothetical protein, conserved                           | 0,6917 | 1,104E-09  |
| TcCLB.504469.20  | hypothetical protein (fragment)                           | 0,6915 | 0,00154    |
| TcCLB.511293.60  | kinesin, putative                                         | 0,6914 | 2,856E-12  |
| TcCLB.509235.20  | C-5 sterol desaturase, putative                           | 0,6914 | 1,733E-08  |
| TcCLB.508545.20  | hypothetical protein, conserved                           | 0,6914 | 0,0002896  |
| TcCLB.511573.10  | leucine-rich repeat protein, putative                     | 0,6913 | 0,00007209 |
| TcCLB.420533.9   | dihydrofolate reductase-thymidylate synthase, putative (f | 0,6911 | 0,00003258 |
| TcCLB.508461.260 | Bem46-like serine peptidase, putative                     | 0,6908 | 5,64E-11   |
| TcCLB.506691.70  | hypothetical protein, conserved                           | 0,6908 | 6,173E-10  |
| TcCLB.511577.140 | hypothetical protein, conserved                           | 0,6906 | 4,839E-07  |
| TcCLB.511395.14  | hypothetical protein, conserved                           | 0,6906 | 0,00006839 |
| TcCLB.503491.29  | surface protease GP63 (pseudogene), putative              | 0,6905 | 0,153      |
| TcCLB.507063.290 | hypothetical protein                                      | 0,6904 | 2,78E-10   |
| TcCLB.508461.50  | hypothetical protein                                      | 0,6903 | 2,133E-06  |
| TcCLB.509341.10  | hypothetical protein, conserved                           | 0,6901 | 5,768E-13  |
| TcCLB.508865.30  | immunodominant antigen, putative                          | 0,6898 | 3,635E-24  |
| TcCLB.507063.280 | hypothetical protein                                      | 0,6898 | 4,123E-15  |
| TcCLB.508851.189 | phosphoenolpyruvate mutase, putative                      | 0,6896 | 4,683E-13  |
| TcCLB.510743.80  | hypothetical protein, conserved                           | 0,6895 | 2,243E-09  |
| TcCLB.506755.279 | hypothetical protein, conserved                           | 0,6895 | 3,632E-09  |
| TcCLB.507807.30  | hypothetical protein                                      | 0,6891 | 0,0029     |

|                  |                                                               |        |            |
|------------------|---------------------------------------------------------------|--------|------------|
| TcCLB.509805.230 | hypothetical protein, conserved                               | 0,6886 | 0,00001074 |
| TcCLB.509537.40  | hypothetical protein, conserved                               | 0,6885 | 4,878E-12  |
| TcCLB.508461.410 | T-complex protein 1, eta subunit, putative                    | 0,6884 | 7,613E-27  |
| TcCLB.511815.10  | hypothetical protein                                          | 0,6881 | 5,854E-16  |
| TcCLB.508053.5   | hypothetical protein, conserved (fragment)                    | 0,6881 | 0,0264     |
| TcCLB.511309.40  | hydrolase-like protein, putative                              | 0,6877 | 0,00004298 |
| TcCLB.508241.130 | hypothetical protein, conserved                               | 0,6875 | 3,299E-15  |
| TcCLB.509715.40  | fibrillarin, putative                                         | 0,6875 | 1,492E-09  |
| TcCLB.508321.50  | hypothetical protein, conserved                               | 0,6871 | 2,837E-15  |
| TcCLB.506943.160 | eukaryotic translation initiation factor 3 subunit 7-like pro | 0,687  | 1,129E-21  |
| TcCLB.511287.30  | 60S ribosomal protein L17, putative                           | 0,687  | 1,909E-20  |
| TcCLB.506211.160 | Mitochondrial ADP/ATP carrier protein 5, putative (MCP5)      | 0,6869 | 2,881E-08  |
| TcCLB.508267.50  | hypothetical protein, conserved                               | 0,6867 | 3,113E-10  |
| TcCLB.508851.180 | 14-3-3 protein 1, putative (14-3-3-I)                         | 0,6866 | 3,565E-18  |
| TcCLB.503655.20  | dispersed gene family protein 1 (DGF-1), putative             | 0,6864 | 1,749E-06  |
| TcCLB.506577.150 | hypothetical protein, conserved                               | 0,6856 | 1,947E-18  |
| TcCLB.511907.310 | hypothetical protein, conserved                               | 0,6856 | 1,97E-15   |
| TcCLB.506257.80  | hypothetical protein, conserved                               | 0,6856 | 4,617E-08  |
| TcCLB.506315.10  | hypothetical protein                                          | 0,6855 | 2,192E-06  |
| TcCLB.507951.170 | ADP-ribosylation factor-like protein 3, putative (arl3)       | 0,6853 | 1,142E-08  |
| TcCLB.510065.40  | hypothetical protein, conserved                               | 0,6852 | 9,264E-18  |
| TcCLB.509777.70  | Calcium ATPase SERCA-like                                     | 0,6851 | 4,167E-22  |
| TcCLB.506513.160 | protein kinase, putative                                      | 0,6849 | 2,574E-11  |
| TcCLB.510349.60  | hypothetical protein, conserved                               | 0,6849 | 0,0001862  |
| TcCLB.506605.200 | hypothetical protein, conserved                               | 0,6847 | 8,996E-08  |
| TcCLB.511145.43  | proteasome subunit alpha type-5, putative                     | 0,6846 | 5,334E-08  |
| TcCLB.509727.20  | retrotransposon hot spot protein (RHS, pseudogene), puta      | 0,6846 | 0,08207    |
| TcCLB.510643.130 | damage-specific DNA binding protein, putative                 | 0,6839 | 1,122E-16  |
| TcCLB.511071.190 | hypothetical protein, conserved                               | 0,6836 | 7,567E-11  |
| TcCLB.506839.80  | phosphoribosylpyrophosphate synthetase, putative              | 0,6835 | 4,263E-18  |
| TcCLB.506941.220 | Present in the outer mitochondrial membrane proteome 3        | 0,6835 | 2,061E-06  |
| TcCLB.511771.75  | hypothetical protein                                          | 0,6832 | 0,0007598  |
| TcCLB.508813.60  | Present in the outer mitochondrial membrane proteome 1        | 0,6831 | 5,816E-18  |
| TcCLB.510759.10  | hypothetical protein, conserved                               | 0,6831 | 3,404E-10  |
| TcCLB.508831.250 | dispersed gene family protein 1 (DGF-1), putative             | 0,683  | 0,0003226  |
| TcCLB.508479.250 | membrane-bound acid phosphatase 2, putative                   | 0,6828 | 5,496E-14  |
| TcCLB.418185.43  | ATP-dependent DEAD/H RNA helicase (pseudogene), puta          | 0,6827 | 0,001221   |
| TcCLB.508143.50  | trans-sialidase (pseudogene), putative                        | 0,6825 | 8,559E-07  |
| TcCLB.506959.94  | hypothetical protein, conserved                               | 0,682  | 9,543E-08  |
| TcCLB.511539.9   | hypothetical protein, conserved                               | 0,6819 | 2,456E-10  |
| TcCLB.511021.70  | ABC transporter of the mitochondrion, putative                | 0,6819 | 1,373E-08  |
| TcCLB.511311.14  | retrotransposon hot spot protein (RHS, pseudogene), puta      | 0,6819 | 2,769E-08  |
| TcCLB.508207.110 | 60S ribosomal protein L7, putative                            | 0,6818 | 5,06E-24   |
| TcCLB.506511.40  | hypothetical protein, conserved                               | 0,6818 | 2,76E-08   |
| TcCLB.510355.220 | GDP-mannose transporter, putative                             | 0,6818 | 0,0001291  |

|                  |                                                          |        |            |
|------------------|----------------------------------------------------------|--------|------------|
| TcCLB.511421.50  | transmembrane protein, putative                          | 0,6817 | 1,267E-12  |
| TcCLB.508989.50  | hypothetical protein, conserved                          | 0,6816 | 1,49E-10   |
| TcCLB.509887.10  | hypothetical protein                                     | 0,6815 | 0,00006738 |
| TcCLB.509795.60  | tRNA pseudouridine synthase TruD, putative               | 0,6811 | 1,056E-10  |
| TcCLB.506407.60  | hypothetical protein, conserved                          | 0,6811 | 2,454E-06  |
| TcCLB.509831.40  | hypothetical protein, conserved                          | 0,681  | 5,537E-07  |
| TcCLB.510741.80  | riboflavin kinase, putative                              | 0,6809 | 0,00002019 |
| TcCLB.507485.110 | hypothetical protein, conserved                          | 0,6807 | 5,985E-13  |
| TcCLB.506247.290 | hypothetical protein, conserved                          | 0,6806 | 1,183E-16  |
| TcCLB.511825.170 | serine/threonine protein phosphatase, putative           | 0,6805 | 4,24E-08   |
| TcCLB.505937.80  | retrotransposon hot spot protein (RHS, pseudogene), puta | 0,6803 | 0,000144   |
| TcCLB.504407.10  | dispersed gene family protein 1 (DGF-1, pseudogene), put | 0,6803 | 0,01839    |
| TcCLB.506679.270 | hypothetical protein, conserved                          | 0,6802 | 8,337E-13  |
| TcCLB.508625.130 | stress-inducible protein STI1-like, putative             | 0,68   | 0,00008975 |
| TcCLB.504103.20  | hypothetical protein, conserved                          | 0,6799 | 2,024E-16  |
| TcCLB.511731.74  | hypothetical protein, conserved                          | 0,6798 | 2,836E-07  |
| TcCLB.509065.120 | hypothetical protein                                     | 0,6798 | 6,909E-06  |
| TcCLB.511743.10  | hypothetical protein, conserved                          | 0,6797 | 1,969E-06  |
| TcCLB.511751.191 | hypothetical protein (pseudogene)                        | 0,6794 | 3,855E-06  |
| TcCLB.510579.70  | nascent polypeptide associated complex subunit, putative | 0,6788 | 1,497E-17  |
| TcCLB.510181.100 | acid phosphatase, putative (AP)                          | 0,6788 | 0,0002056  |
| TcCLB.510355.260 | hypothetical protein, conserved                          | 0,6785 | 0,0009949  |
| TcCLB.507049.50  | ABC transporter, putative                                | 0,6784 | 9,229E-08  |
| TcCLB.511545.160 | hypothetical protein, conserved                          | 0,6783 | 2,214E-07  |
| TcCLB.504003.50  | hypothetical protein, conserved                          | 0,6783 | 0,00001689 |
| TcCLB.509915.20  | dispersed gene family protein 1 (DGF-1), putative        | 0,678  | 0,0003071  |
| TcCLB.511821.40  | hypothetical protein, conserved                          | 0,6774 | 2,875E-06  |
| TcCLB.506337.150 | hypothetical protein, conserved                          | 0,6773 | 1,694E-07  |
| TcCLB.506659.20  | mitochondrial DNA polymerase I protein C, putative       | 0,677  | 2,343E-19  |
| TcCLB.508827.90  | hypothetical protein, conserved                          | 0,6769 | 2,727E-07  |
| TcCLB.509395.20  | phosphatidylinositol kinase related protein, putative    | 0,6767 | 1,245E-14  |
| TcCLB.508559.29  | dispersed gene family protein 1 (DGF-1), putative        | 0,6767 | 0,00001005 |
| TcCLB.507881.10  | retrotransposon hot spot protein (RHS, pseudogene), puta | 0,6766 | 6,123E-07  |
| TcCLB.506401.160 | hypothetical protein, conserved                          | 0,6766 | 0,00003502 |
| TcCLB.504131.100 | DnaJ chaperone protein, putative                         | 0,6763 | 5,126E-14  |
| TcCLB.510721.21  | hypothetical protein                                     | 0,6756 | 0,06117    |
| TcCLB.510519.14  | hypothetical protein, conserved                          | 0,6754 | 0,00003395 |
| TcCLB.507663.60  | hypothetical protein, conserved                          | 0,6753 | 1,814E-08  |
| TcCLB.510099.60  | hypothetical protein                                     | 0,6752 | 8,621E-12  |
| TcCLB.506635.90  | ubiquitin-protein ligase, putative                       | 0,675  | 2,125E-06  |
| TcCLB.503945.20  | hypothetical protein, conserved                          | 0,675  | 0,0006376  |
| TcCLB.504013.40  | serine acetyltransferase, putative (SAT)                 | 0,6748 | 1,898E-09  |
| TcCLB.510257.130 | protein kinase, putative                                 | 0,6745 | 7,102E-14  |
| TcCLB.509915.60  | retrotransposon hot spot (RHS) protein, putative         | 0,6742 | 4,084E-06  |
| TcCLB.507053.20  | hypothetical protein, conserved                          | 0,674  | 1,361E-10  |

|                  |                                                         |        |            |
|------------------|---------------------------------------------------------|--------|------------|
| TcCLB.508851.150 | hypothetical protein, conserved                         | 0,674  | 1,114E-07  |
| TcCLB.506773.20  | hypothetical protein, conserved                         | 0,6739 | 1,053E-12  |
| TcCLB.507049.90  | hypothetical protein, conserved                         | 0,6737 | 1,14E-07   |
| TcCLB.506297.330 | 40S ribosomal protein S15A, putative                    | 0,6734 | 2,755E-19  |
| TcCLB.449247.10  | hypothetical protein, conserved                         | 0,6734 | 0,00000374 |
| TcCLB.507179.7   | trans-sialidase (pseudogene), putative                  | 0,6732 | 3,163E-06  |
| TcCLB.504111.20  | metallo- peptidase, Clan MG, Family M24                 | 0,673  | 7,484E-11  |
| TcCLB.507233.70  | trans-sialidase (pseudogene), putative                  | 0,673  | 2,027E-10  |
| TcCLB.503851.54  | proteasome 26S non-ATPase subunit 9, putative           | 0,673  | 0,01606    |
| TcCLB.511181.20  | hypothetical protein, conserved                         | 0,6729 | 1,282E-08  |
| TcCLB.508119.150 | hypothetical protein, conserved                         | 0,6729 | 1,921E-06  |
| TcCLB.503439.80  | glycine dehydrogenase [decarboxylating] (pseudogene), p | 0,6729 | 0,00005517 |
| TcCLB.511125.9   | dispersed gene family protein 1 (DGF-1), putative       | 0,6724 | 0,005712   |
| TcCLB.507009.60  | hypothetical protein, conserved                         | 0,6723 | 1,235E-13  |
| TcCLB.504103.90  | hypothetical protein, conserved                         | 0,6723 | 6,639E-07  |
| TcCLB.508987.20  | hypothetical protein, conserved                         | 0,6722 | 1,961E-12  |
| TcCLB.506147.120 | hypothetical protein, conserved                         | 0,672  | 1,166E-07  |
| TcCLB.506389.60  | hypothetical protein, conserved                         | 0,6718 | 1,366E-08  |
| TcCLB.510691.95  | hypothetical protein, conserved (fragment)              | 0,6718 | 1,727E-06  |
| TcCLB.503635.68  | 40S ribosomal protein S3A, putative                     | 0,6717 | 4,293E-15  |
| TcCLB.506737.10  | hypothetical protein, conserved                         | 0,6717 | 1,563E-11  |
| TcCLB.504433.10  | ADP-ribosylation factor-like protein 3, putative (arl3) | 0,6716 | 9,741E-08  |
| TcCLB.503689.4   | Ras-related protein RabX1, putative (RABX1)             | 0,6715 | 7,325E-07  |
| TcCLB.511071.140 | 2-amino-3-ketobutyrate coenzyme A ligase, putative      | 0,6711 | 1,022E-06  |
| TcCLB.510121.70  | hypothetical protein, conserved                         | 0,671  | 5,101E-11  |
| TcCLB.505789.10  | hypothetical protein, conserved                         | 0,6706 | 3,286E-06  |
| TcCLB.506587.70  | hypothetical protein, conserved                         | 0,6704 | 2,951E-11  |
| TcCLB.503973.40  | dispersed gene family protein 1 (DGF-1), putative       | 0,6703 | 0,008409   |
| TcCLB.508741.330 | hypothetical protein, conserved                         | 0,6702 | 4,604E-09  |
| TcCLB.503905.30  | hypothetical protein, conserved                         | 0,6699 | 1,799E-08  |
| TcCLB.510609.30  | GTPase, putative                                        | 0,6696 | 1,167E-08  |
| TcCLB.511895.69  | C-5 sterol desaturase, putative                         | 0,6694 | 0,0002724  |
| TcCLB.505647.30  | hypothetical protein, conserved                         | 0,6693 | 1,044E-10  |
| TcCLB.511767.20  | dispersed gene family protein 1 (DGF-1), putative       | 0,669  | 0,00005712 |
| TcCLB.509717.50  | hypothetical protein, conserved                         | 0,6686 | 9,618E-18  |
| TcCLB.506015.30  | mucin-associated surface protein (MASP, pseudogene), p  | 0,6686 | 0,00001634 |
| TcCLB.511577.188 | hypothetical protein, conserved                         | 0,6685 | 1,222E-06  |
| TcCLB.509961.51  | tryptophanyl-tRNA synthetase (pseudogene), putative     | 0,6685 | 0,004818   |
| TcCLB.505123.20  | hypothetical protein, conserved                         | 0,6684 | 0,01704    |
| TcCLB.510029.70  | 40S ribosomal protein S13, putative                     | 0,6682 | 1,072E-14  |
| TcCLB.510671.20  | tryptophanyl-tRNA synthetase, putative                  | 0,6681 | 4,487E-20  |
| TcCLB.509867.50  | hypothetical protein, conserved (pseudogene)            | 0,6681 | 0,01941    |
| TcCLB.510359.210 | hypothetical protein, conserved                         | 0,6679 | 1,661E-09  |
| TcCLB.507615.73  | hypothetical protein, conserved                         | 0,6677 | 4,589E-11  |
| TcCLB.511039.10  | kinetoplast DNA-associated protein, putative            | 0,6677 | 7,497E-10  |

|                  |                                                          |        |            |
|------------------|----------------------------------------------------------|--------|------------|
| TcCLB.508959.4   | cytochrome c, putative                                   | 0,6677 | 1,477E-08  |
| TcCLB.509167.20  | 3-hydroxy-3-methylglutaryl-CoA reductase, putative       | 0,6671 | 1,492E-13  |
| TcCLB.511731.35  | hypothetical protein, conserved                          | 0,6671 | 1,141E-06  |
| TcCLB.504425.90  | aldose 1-epimerase-like protein, putative                | 0,667  | 0,0001144  |
| TcCLB.510073.40  | hypothetical protein, conserved                          | 0,667  | 0,001623   |
| TcCLB.508589.60  | hypothetical protein, conserved (pseudogene)             | 0,6666 | 0,00002775 |
| TcCLB.511649.94  | hypothetical protein, conserved                          | 0,6664 | 3,743E-08  |
| TcCLB.510519.60  | calcineurin B subunit, putative (CNB)                    | 0,6663 | 7,128E-07  |
| TcCLB.506753.240 | hypothetical protein, conserved                          | 0,6663 | 0,00004369 |
| TcCLB.511585.90  | hypothetical protein, conserved                          | 0,6662 | 3,827E-12  |
| TcCLB.509171.90  | splicing factor 3a, putative                             | 0,6661 | 2,545E-10  |
| TcCLB.504149.110 | GTP-binding protein, putative                            | 0,6661 | 2,893E-10  |
| TcCLB.507017.64  | hypothetical protein, conserved                          | 0,6659 | 0,00002459 |
| TcCLB.508723.110 | hypothetical protein                                     | 0,6658 | 4,652E-12  |
| TcCLB.509429.329 | cruzipain precursor, putative (fragment)                 | 0,6657 | 8,038E-25  |
| TcCLB.510973.30  | 40S ribosomal protein S13, putative                      | 0,6657 | 1,845E-22  |
| TcCLB.431889.10  | hypothetical protein, conserved (fragment)               | 0,6655 | 0,05153    |
| TcCLB.508649.14  | hypothetical protein, conserved                          | 0,6653 | 1,97E-10   |
| TcCLB.506211.130 | hypothetical protein, conserved                          | 0,6653 | 6,037E-09  |
| TcCLB.511289.100 | hypothetical protein, conserved                          | 0,6652 | 1,576E-13  |
| TcCLB.505171.44  | hypothetical protein, conserved                          | 0,6644 | 0,0004354  |
| TcCLB.511649.14  | hypothetical protein, conserved (fragment)               | 0,6641 | 5,243E-06  |
| TcCLB.507883.40  | hypothetical protein, conserved                          | 0,6632 | 1,175E-06  |
| TcCLB.509321.19  | GTP-binding protein, putative                            | 0,6631 | 1,001E-07  |
| TcCLB.506163.70  | hypothetical protein, conserved                          | 0,663  | 9,489E-09  |
| TcCLB.503965.30  | hypothetical protein, conserved                          | 0,663  | 1,263E-06  |
| TcCLB.508813.80  | hypothetical protein, conserved                          | 0,6625 | 9,635E-11  |
| TcCLB.506129.80  | retrotransposon hot spot protein (RHS, pseudogene), puta | 0,6622 | 6,851E-07  |
| TcCLB.509471.86  | histone H3, putative                                     | 0,6621 | 2,14E-17   |
| TcCLB.509625.30  | hypothetical protein, conserved                          | 0,662  | 0,0000043  |
| TcCLB.509611.60  | hypothetical protein                                     | 0,662  | 0,0002381  |
| TcCLB.511303.110 | hypothetical protein, conserved                          | 0,6619 | 6,667E-09  |
| TcCLB.507245.10  | retrotransposon hot spot protein (RHS, pseudogene), puta | 0,6617 | 8,651E-08  |
| TcCLB.511309.30  | hydrolase, alpha/beta fold family, putative              | 0,6617 | 8,534E-07  |
| TcCLB.508145.40  | hypothetical protein, conserved                          | 0,6617 | 0,00003339 |
| TcCLB.508593.110 | arginine N-methyltransferase, putative                   | 0,6613 | 1,864E-08  |
| TcCLB.509589.40  | hypothetical protein, conserved                          | 0,6611 | 9,676E-18  |
| TcCLB.506621.14  | ubiquitin ligase, putative                               | 0,6608 | 2,657E-07  |
| TcCLB.511865.50  | hypothetical protein, conserved                          | 0,6605 | 0,00002013 |
| TcCLB.511613.90  | mucin-associated surface protein (MASP), putative        | 0,6604 | 0,01086    |
| TcCLB.507021.70  | hypothetical protein, conserved                          | 0,6603 | 3,348E-09  |
| TcCLB.510357.50  | hypothetical protein, conserved                          | 0,6603 | 7,898E-07  |
| TcCLB.503729.19  | hypothetical protein (fragment)                          | 0,6602 | 4,215E-07  |
| TcCLB.503987.39  | hypothetical protein, conserved                          | 0,6601 | 0,00006878 |
| TcCLB.508779.80  | hypothetical protein, conserved                          | 0,66   | 3,574E-10  |

|                  |                                                           |        |            |
|------------------|-----------------------------------------------------------|--------|------------|
| TcCLB.507007.77  | hypothetical protein, conserved                           | 0,66   | 0,002647   |
| TcCLB.507531.10  | hypothetical protein, conserved (pseudogene)              | 0,6598 | 8,939E-17  |
| TcCLB.506363.10  | hypothetical protein                                      | 0,6598 | 0,0002151  |
| TcCLB.508967.20  | dispersed gene family protein 1 (DGF-1), putative         | 0,6597 | 0,0182     |
| TcCLB.506529.100 | hypothetical protein, conserved                           | 0,6595 | 6,002E-11  |
| TcCLB.468941.9   | ATP-dependent DEAD/H RNA helicase, putative (fragment     | 0,6595 | 8,357E-11  |
| TcCLB.506363.110 | RNA editing ligase, putative                              | 0,6594 | 1,322E-09  |
| TcCLB.508373.20  | dihydroorotase, putative                                  | 0,6593 | 3,629E-09  |
| TcCLB.504827.120 | hypothetical protein, conserved                           | 0,6591 | 7,686E-08  |
| TcCLB.511011.30  | hypothetical protein, conserved (pseudogene)              | 0,6591 | 0,0001071  |
| TcCLB.509785.120 | hypothetical protein, conserved (pseudogene)              | 0,6582 | 0,04761    |
| TcCLB.509769.140 | hypothetical protein, conserved                           | 0,6581 | 3,254E-07  |
| TcCLB.511561.11  | hypothetical protein, conserved (pseudogene)              | 0,6581 | 0,00001081 |
| TcCLB.506435.260 | hypothetical protein                                      | 0,658  | 2,678E-08  |
| TcCLB.510719.100 | hypothetical protein, conserved                           | 0,6578 | 0,000204   |
| TcCLB.511003.60  | 3-ketoacyl-CoA thiolase, putative (ACAT)                  | 0,6576 | 1,123E-09  |
| TcCLB.508611.30  | surface protease GP63, putative                           | 0,6576 | 3,38E-07   |
| TcCLB.506417.70  | hypothetical protein                                      | 0,6576 | 3,273E-06  |
| TcCLB.511819.20  | hypothetical protein, conserved                           | 0,6573 | 5,116E-13  |
| TcCLB.503843.10  | hypothetical protein, conserved                           | 0,6571 | 1,432E-08  |
| TcCLB.436083.9   | hypothetical protein, conserved                           | 0,6569 | 3,714E-07  |
| TcCLB.506401.200 | hypothetical protein, conserved                           | 0,6568 | 1,141E-06  |
| TcCLB.508173.264 | hypothetical protein, conserved                           | 0,6567 | 6,683E-16  |
| TcCLB.506779.50  | proteasome beta 3 subunit, putative                       | 0,6566 | 1,629E-11  |
| TcCLB.511395.20  | phosphatidylglycerolphosphate synthase, mitochondrial, p  | 0,6565 | 2,72E-09   |
| TcCLB.508539.20  | hypothetical protein, conserved                           | 0,6561 | 0,0003124  |
| TcCLB.509693.60  | hypothetical protein, conserved                           | 0,656  | 0,00001824 |
| TcCLB.429257.20  | cytochrome b5-dependent oleate desaturase                 | 0,6559 | 3,408E-11  |
| TcCLB.508705.10  | retrotransposon hot spot protein (RHS, pseudogene), puta  | 0,6558 | 1,853E-08  |
| TcCLB.506271.20  | N-acetyltransferase complex ARD1 subunit (pseudogene),    | 0,6558 | 0,1091     |
| TcCLB.507817.18  | histone H3, putative                                      | 0,6557 | 8,675E-06  |
| TcCLB.504233.4   | trifunctional enzyme alpha subunit, mitochondrial precurs | 0,6555 | 0,0505     |
| TcCLB.506249.70  | ABC transporter, putative                                 | 0,6553 | 6,416E-11  |
| TcCLB.511421.110 | developmentally regulated phosphoprotein, putative        | 0,6552 | 4,105E-11  |
| TcCLB.510659.180 | hypothetical protein, conserved                           | 0,6547 | 2,243E-09  |
| TcCLB.510543.10  | retrotransposon hot spot protein (RHS, pseudogene), puta  | 0,6546 | 3,206E-06  |
| TcCLB.506359.60  | UTP-glucose-1-phosphate uridylyltransferase 2, putative   | 0,6544 | 0,00001768 |
| TcCLB.506481.20  | hypothetical protein, conserved                           | 0,6543 | 1,52E-21   |
| TcCLB.510755.80  | hypothetical protein, conserved                           | 0,6541 | 1,241E-07  |
| TcCLB.507615.100 | Present in the outer mitochondrial membrane proteome 2    | 0,6539 | 3,974E-14  |
| TcCLB.510819.4   | NADH-cytochrome b5 reductase, putative                    | 0,6539 | 9,329E-07  |
| TcCLB.509207.140 | hypothetical protein, conserved                           | 0,6537 | 1,679E-11  |
| TcCLB.510685.10  | calreticulin, putative                                    | 0,6536 | 3,367E-17  |
| TcCLB.511827.10  | hypothetical protein, conserved                           | 0,6536 | 0,005418   |
| TcCLB.509965.140 | hypothetical protein, conserved                           | 0,6535 | 5,901E-08  |

|                  |                                                           |        |            |
|------------------|-----------------------------------------------------------|--------|------------|
| TcCLB.510313.20  | hypothetical protein, conserved                           | 0,6534 | 6,273E-12  |
| TcCLB.509149.80  | hypothetical protein, conserved                           | 0,6533 | 2,123E-09  |
| TcCLB.511179.110 | hypothetical protein, conserved                           | 0,6532 | 1,426E-10  |
| TcCLB.510311.140 | arginine N-methyltransferase, putative                    | 0,6531 | 4,219E-11  |
| TcCLB.511277.260 | hypothetical protein, conserved                           | 0,6531 | 3,76E-07   |
| TcCLB.507053.50  | hypothetical protein, conserved                           | 0,6528 | 1,232E-09  |
| TcCLB.511001.9   | 40S ribosomal protein S3A, putative                       | 0,6528 | 1,015E-06  |
| TcCLB.510105.90  | hypothetical protein, conserved                           | 0,6524 | 2,188E-09  |
| TcCLB.508139.140 | dispersed gene family protein 1 (DGF-1), putative         | 0,6523 | 0,00001016 |
| TcCLB.509831.30  | hypothetical protein, conserved                           | 0,6522 | 1,017E-10  |
| TcCLB.505317.20  | hypothetical protein                                      | 0,6521 | 3,813E-07  |
| TcCLB.510359.80  | hypothetical protein                                      | 0,6521 | 0,0007195  |
| TcCLB.508479.180 | hypothetical protein, conserved                           | 0,6515 | 5,063E-15  |
| TcCLB.504141.20  | hypothetical protein, conserved                           | 0,651  | 6,264E-09  |
| TcCLB.509053.160 | hypothetical protein, conserved                           | 0,651  | 1,491E-07  |
| TcCLB.504159.40  | aquaporin-like protein, putative                          | 0,6509 | 7,586E-08  |
| TcCLB.509719.28  | hypothetical protein, conserved                           | 0,6508 | 0,001778   |
| TcCLB.506595.60  | beta galactofuranosyl glycosyltransferase (pseudogene), f | 0,6505 | 4,031E-07  |
| TcCLB.509053.179 | RNA-binding protein, putative (fragment)                  | 0,6504 | 1,273E-06  |
| TcCLB.503431.10  | caltractin, putative                                      | 0,6504 | 0,003436   |
| TcCLB.507835.60  | retrotransposon hot spot protein (RHS, pseudogene), puta  | 0,6501 | 7,809E-06  |
| TcCLB.508865.20  | mitochondrial DNA polymerase I protein C, putative        | 0,65   | 8,535E-18  |
| TcCLB.511729.40  | 60S ribosomal protein L9, putative                        | 0,65   | 1,857E-06  |
| TcCLB.510003.20  | hypothetical protein, conserved                           | 0,6499 | 7,421E-18  |
| TcCLB.510089.110 | mitochondrial RNA binding complex 1 subunit, putative     | 0,6499 | 7,666E-08  |
| TcCLB.421057.10  | adrenodoxin precursor, putative                           | 0,6499 | 0,0001548  |
| TcCLB.507517.40  | hypothetical protein, conserved                           | 0,6498 | 2,34E-13   |
| TcCLB.508647.290 | DNA repair and recombination protein RAD54, putative      | 0,6497 | 3,973E-15  |
| TcCLB.508355.150 | proteasome regulatory non-ATPase subunit 3, putative      | 0,6495 | 4,647E-19  |
| TcCLB.510657.150 | hypothetical protein                                      | 0,6495 | 1,722E-08  |
| TcCLB.511305.10  | 5'-3' exoribonuclease B, putative                         | 0,6494 | 5,301E-08  |
| TcCLB.509815.70  | retrotransposon hot spot protein (RHS, pseudogene), puta  | 0,6493 | 4,33E-07   |
| TcCLB.508241.104 | hypothetical protein, conserved                           | 0,6492 | 9,355E-14  |
| TcCLB.510003.9   | hypothetical protein, conserved                           | 0,6491 | 1,622E-08  |
| TcCLB.508055.20  | retrotransposon hot spot protein (RHS, pseudogene), puta  | 0,6489 | 0,0002458  |
| TcCLB.507611.199 | dispersed gene family protein 1 (DGF-1), putative         | 0,6489 | 0,002239   |
| TcCLB.506657.70  | RNA editing 3' terminal uridylyl transferase 1, putative  | 0,6486 | 2,764E-18  |
| TcCLB.511759.20  | trans-sialidase (pseudogene), putative                    | 0,6486 | 1,655E-07  |
| TcCLB.510323.4   | katanin, putative                                         | 0,6485 | 9,107E-10  |
| TcCLB.507611.370 | protein disulfide isomerase 2 (PDI2)                      | 0,6483 | 3,414E-23  |
| TcCLB.509571.79  | Ras-related protein RabX1, putative (RABX1)               | 0,6483 | 1,917E-07  |
| TcCLB.506975.80  | trans-sialidase, Group I, putative                        | 0,6483 | 0,0000331  |
| TcCLB.511367.60  | la RNA binding protein, putative                          | 0,6482 | 1,197E-13  |
| TcCLB.509109.140 | hypothetical protein, conserved                           | 0,6482 | 2,445E-08  |
| TcCLB.509715.150 | hypothetical protein                                      | 0,6482 | 0,0001489  |



|                  |                                                               |        |            |
|------------------|---------------------------------------------------------------|--------|------------|
| TcCLB.508299.70  | peroxisome targeting signal 1 receptor, putative (PEX5)       | 0,6481 | 1,347E-10  |
| TcCLB.504037.10  | hypothetical protein, conserved                               | 0,6481 | 1,688E-06  |
| TcCLB.506559.170 | 8-oxoguanine DNA glycosylase, putative                        | 0,6478 | 2,822E-12  |
| TcCLB.510737.30  | mitochondrial carrier protein, putative                       | 0,6478 | 3,289E-07  |
| TcCLB.508637.120 | hypothetical protein, conserved                               | 0,6477 | 8,06E-08   |
| TcCLB.510463.190 | retrotransposon hot spot (RHS) protein, putative              | 0,6476 | 0,0001573  |
| TcCLB.507831.10  | hypothetical protein                                          | 0,6473 | 0,002245   |
| TcCLB.427355.10  | oligosaccharyl transferase subunit, putative (fragment)       | 0,6471 | 6,073E-07  |
| TcCLB.511275.10  | hypothetical protein, conserved (pseudogene)                  | 0,647  | 1,114E-15  |
| TcCLB.511643.10  | hypothetical protein, conserved                               | 0,647  | 3,62E-07   |
| TcCLB.509611.50  | hypothetical protein, conserved                               | 0,647  | 0,00000305 |
| TcCLB.506739.200 | protein phosphatase 2C, putative                              | 0,6469 | 3,144E-17  |
| TcCLB.508035.10  | dispersed gene family protein 1 (DGF-1, pseudogene), putative | 0,6468 | 0,05914    |
| TcCLB.508577.100 | pumilio/PUF RNA binding protein 5, putative (PUF5)            | 0,6466 | 1,341E-06  |
| TcCLB.408799.19  | isopentenyl-diphosphate delta-isomerase (fragment) (idi1)     | 0,6465 | 0,00004702 |
| TcCLB.507063.70  | trans-sialidase, Group II, putative                           | 0,6464 | 1,541E-07  |
| TcCLB.503557.30  | hypothetical protein, conserved                               | 0,6462 | 6,469E-07  |
| TcCLB.510293.60  | hypothetical protein, conserved                               | 0,6459 | 9,549E-06  |
| TcCLB.504445.20  | retrotransposon hot spot protein (RHS, pseudogene), putative  | 0,6458 | 3,671E-06  |
| TcCLB.507547.30  | Mitochondrial-processing peptidase subunit alpha (MPPA)       | 0,6455 | 1,609E-13  |
| TcCLB.503605.10  | retrotransposon hot spot protein (RHS, pseudogene), putative  | 0,6455 | 3,352E-12  |
| TcCLB.505121.9   | dispersed gene family protein 1 (DGF-1), putative (fragment)  | 0,6454 | 0,0004048  |
| TcCLB.511237.110 | cyclophilin, putative                                         | 0,6453 | 2,839E-08  |
| TcCLB.507787.170 | retrotransposon hot spot protein (RHS, pseudogene), putative  | 0,6452 | 1,331E-12  |
| TcCLB.511135.10  | hypothetical protein, conserved (pseudogene)                  | 0,645  | 1,83E-07   |
| TcCLB.510781.10  | dispersed gene family protein 1 (DGF-1, pseudogene), putative | 0,645  | 0,0006914  |
| TcCLB.506489.30  | hypothetical protein, conserved                               | 0,6449 | 4,807E-11  |
| TcCLB.504133.15  | hypothetical protein, conserved (fragment)                    | 0,6449 | 0,001241   |
| TcCLB.508569.100 | hypothetical protein, conserved                               | 0,6448 | 1,307E-06  |
| TcCLB.505807.10  | cyclophilin, putative                                         | 0,6447 | 8,424E-06  |
| TcCLB.506689.10  | trans-sialidase (pseudogene), putative                        | 0,6443 | 0,01165    |
| TcCLB.506853.40  | hypothetical protein, conserved                               | 0,6442 | 8,402E-07  |
| TcCLB.511711.40  | hypothetical protein, conserved                               | 0,6442 | 6,307E-06  |
| TcCLB.507625.183 | SNARE domain-containing protein, putative (SNARE2.1)          | 0,6438 | 0,00001629 |
| TcCLB.506425.130 | hypothetical protein, conserved                               | 0,6437 | 1,031E-07  |
| TcCLB.509147.50  | mucin TcSMUGL, putative                                       | 0,6436 | 4,82E-08   |
| TcCLB.503707.9   | dispersed gene family protein 1 (DGF-1, pseudogene), putative | 0,6436 | 0,0003421  |
| TcCLB.510995.9   | dispersed gene family protein 1 (DGF-1), putative             | 0,6436 | 0,007777   |
| TcCLB.508999.220 | calpain cysteine peptidase, putative                          | 0,6432 | 0,00000607 |
| TcCLB.511825.60  | aquaporin, putative                                           | 0,6431 | 8,068E-10  |
| TcCLB.509213.50  | hypothetical protein, conserved                               | 0,6431 | 3,507E-06  |
| TcCLB.507921.9   | dispersed gene family protein 1 (DGF-1), putative             | 0,643  | 0,0004992  |
| TcCLB.401469.20  | pumilio/PUF RNA binding protein 7, putative (PUF7)            | 0,6429 | 2,955E-06  |
| TcCLB.508307.134 | hypothetical protein, conserved                               | 0,6429 | 0,00001222 |
| TcCLB.510345.40  | hypothetical protein, conserved                               | 0,6425 | 1,633E-07  |

|                  |                                                          |        |            |
|------------------|----------------------------------------------------------|--------|------------|
| TcCLB.506193.10  | hypothetical protein, conserved                          | 0,6422 | 9,476E-13  |
| TcCLB.509109.160 | hypothetical protein, conserved                          | 0,6422 | 0,0005862  |
| TcCLB.507203.9   | dispersed gene family protein 1 (DGF-1), putative        | 0,6421 | 0,02554    |
| TcCLB.508285.30  | ATP-dependent DEAD/H RNA helicase (pseudogene), puta     | 0,6419 | 0,1428     |
| TcCLB.510181.9   | inositol-3-phosphate synthase, putative (fragment)       | 0,6418 | 1,159E-06  |
| TcCLB.504431.50  | hypothetical protein, conserved                          | 0,6417 | 1,372E-10  |
| TcCLB.410923.40  | trans-sialidase (pseudogene), putative                   | 0,6415 | 7,666E-07  |
| TcCLB.509777.140 | hypothetical protein, conserved                          | 0,6415 | 1,377E-06  |
| TcCLB.509965.180 | RNA-binding protein, putative                            | 0,6412 | 1,314E-10  |
| TcCLB.510037.5   | elongation factor 1-gamma (EF-1-gamma), putative         | 0,6412 | 0,00004813 |
| TcCLB.509319.40  | hypothetical protein, conserved                          | 0,6409 | 1,014E-07  |
| TcCLB.505939.70  | hypothetical protein, conserved                          | 0,6407 | 1,83E-09   |
| TcCLB.510749.10  | hypothetical protein, conserved                          | 0,6405 | 1,807E-09  |
| TcCLB.509995.10  | 60S ribosomal protein L4, putative                       | 0,6404 | 5,66E-16   |
| TcCLB.509805.160 | hypothetical protein, conserved                          | 0,6404 | 1,36E-10   |
| TcCLB.503809.110 | phosphatidic acid phosphatase protein, putative          | 0,6403 | 6,189E-10  |
| TcCLB.507559.30  | hypothetical protein, conserved                          | 0,6403 | 1,611E-09  |
| TcCLB.506813.160 | dispersed gene family protein 1 (DGF-1, pseudogene), put | 0,6403 | 0,006484   |
| TcCLB.510519.40  | protein kinase, putative                                 | 0,6402 | 4,025E-09  |
| TcCLB.510359.360 | hypothetical protein, conserved                          | 0,6398 | 2,077E-07  |
| TcCLB.506605.210 | leucine-rich repeat protein (LRRP), putative             | 0,6397 | 4,201E-12  |
| TcCLB.505071.130 | hypothetical protein, conserved                          | 0,6396 | 6,881E-09  |
| TcCLB.506155.20  | hypothetical protein, conserved                          | 0,6395 | 1,943E-10  |
| TcCLB.508953.19  | hypothetical protein, conserved                          | 0,6395 | 1,626E-08  |
| TcCLB.508641.110 | hypothetical protein, conserved                          | 0,6392 | 8,944E-06  |
| TcCLB.504017.54  | hypothetical protein, conserved                          | 0,639  | 1,558E-09  |
| TcCLB.511887.50  | hypothetical protein, conserved                          | 0,639  | 0,01433    |
| TcCLB.508747.40  | mucin TcMUCII, putative                                  | 0,6389 | 0,002884   |
| TcCLB.503635.59  | 40S ribosomal protein S3A, putative                      | 0,6382 | 6,673E-14  |
| TcCLB.510431.80  | hypothetical protein, conserved                          | 0,6381 | 5,878E-14  |
| TcCLB.506727.100 | enoyl-CoA hydratase/isomerase family protein, putative   | 0,6377 | 2,634E-09  |
| TcCLB.508917.10  | protein kinase, putative                                 | 0,6377 | 1,03E-08   |
| TcCLB.510421.60  | hypothetical protein, conserved                          | 0,6374 | 5,033E-09  |
| TcCLB.507585.10  | amino acid transporter, putative                         | 0,637  | 5,82E-24   |
| TcCLB.509099.80  | hypothetical protein, conserved                          | 0,637  | 1,248E-16  |
| TcCLB.510285.110 | hypothetical protein, conserved                          | 0,637  | 1,297E-07  |
| TcCLB.504099.15  | hypothetical protein                                     | 0,637  | 0,03637    |
| TcCLB.511211.220 | heat shock protein 70, putative                          | 0,6366 | 5,905E-10  |
| TcCLB.508153.920 | choline/ethanolamine phosphotransferase, putative        | 0,6366 | 4,769E-09  |
| TcCLB.506559.210 | hypothetical protein, conserved                          | 0,6363 | 2,688E-08  |
| TcCLB.507875.40  | trans-sialidase (pseudogene), putative                   | 0,6363 | 0,00001441 |
| TcCLB.506163.40  | vacuolar type h ATPase subunit, putative                 | 0,6363 | 0,05232    |
| TcCLB.510039.60  | hypothetical protein, conserved                          | 0,6362 | 5,726E-14  |
| TcCLB.508737.80  | mannosyltransferase-like protein, putative               | 0,636  | 3,533E-09  |
| TcCLB.509055.10  | RNA-binding protein, putative                            | 0,636  | 0,00001154 |

|                  |                                                             |        |            |
|------------------|-------------------------------------------------------------|--------|------------|
| TcCLB.511301.50  | hypothetical protein, conserved                             | 0,6358 | 1,475E-12  |
| TcCLB.507583.30  | hypothetical protein                                        | 0,6358 | 5,705E-06  |
| TcCLB.508153.730 | eukaryotic initiation factor 2a, putative                   | 0,6355 | 3,585E-16  |
| TcCLB.509087.10  | retrotransposon hot spot protein (RHS, pseudogene), puta    | 0,6355 | 0,005789   |
| TcCLB.507803.30  | hypothetical protein                                        | 0,6354 | 8,633E-10  |
| TcCLB.506859.10  | ubiquitin-conjugating enzyme E2, putative                   | 0,6353 | 1,966E-07  |
| TcCLB.511529.220 | hypothetical protein, conserved                             | 0,6351 | 0,0003671  |
| TcCLB.508071.40  | hypothetical protein                                        | 0,6349 | 0,04164    |
| TcCLB.504241.80  | trans-sialidase (pseudogene), putative                      | 0,6348 | 1,756E-08  |
| TcCLB.507009.20  | hypothetical protein, conserved                             | 0,6347 | 0,0002784  |
| TcCLB.506893.80  | monothiol glutaredoxin, putative                            | 0,6344 | 0,00007498 |
| TcCLB.507295.61  | elongation factor 1-gamma (EF-1-gamma, pseudogene),         | 0,6344 | 0,06257    |
| TcCLB.504231.20  | hypothetical protein, conserved                             | 0,6343 | 2,064E-12  |
| TcCLB.508547.150 | hypothetical protein, conserved                             | 0,634  | 3E-12      |
| TcCLB.510603.130 | hypothetical protein, conserved                             | 0,6339 | 1,801E-13  |
| TcCLB.507811.114 | hypothetical protein, conserved                             | 0,6339 | 1,216E-08  |
| TcCLB.510421.130 | mitochondrial RNA binding complex 1 subunit, putative       | 0,6338 | 7,593E-09  |
| TcCLB.504105.150 | importin beta-1 subunit, putative                           | 0,6335 | 1,005E-18  |
| TcCLB.506737.70  | ubiquitin-like protein, putative                            | 0,6333 | 1,321E-16  |
| TcCLB.511201.40  | hypothetical protein, conserved                             | 0,6329 | 4,913E-06  |
| TcCLB.511733.130 | chaperonin HSP60, putative (fragment)                       | 0,6329 | 0,0000144  |
| TcCLB.511511.130 | hypothetical protein, conserved                             | 0,6328 | 1,564E-10  |
| TcCLB.511163.24  | hypothetical protein, conserved                             | 0,6326 | 0,00001549 |
| TcCLB.509967.189 | kinesin, putative (fragment)                                | 0,6325 | 0,0006145  |
| TcCLB.504009.20  | hypothetical protein, conserved                             | 0,6322 | 2,658E-08  |
| TcCLB.510105.230 | glyceraldehyde 3-phosphate dehydrogenase, cytosolic, put    | 0,6322 | 0,00000301 |
| TcCLB.506625.70  | RNA-binding protein, putative                               | 0,632  | 1,526E-13  |
| TcCLB.504229.20  | glycine dehydrogenase [decarboxylating] (pseudogene), p     | 0,632  | 4,99E-12   |
| TcCLB.509453.60  | hypothetical protein, conserved                             | 0,6319 | 1,423E-10  |
| TcCLB.506583.60  | Elongation factor G1, mitochondrial, putative (EF-G1)       | 0,6318 | 2,46E-16   |
| TcCLB.508595.40  | cysteine peptidase, putative                                | 0,6318 | 4,539E-07  |
| TcCLB.507083.10  | hypothetical protein, conserved                             | 0,6316 | 3,568E-12  |
| TcCLB.511823.79  | hypothetical protein, conserved                             | 0,6316 | 2,532E-06  |
| TcCLB.416809.10  | dispersed gene family protein 1 (DGF-1), putative           | 0,6313 | 0,0003008  |
| TcCLB.509223.60  | beta galactofuranosyl glycosyltransferase, putative         | 0,6312 | 0,002382   |
| TcCLB.504077.60  | hypothetical protein, conserved (pseudogene)                | 0,6312 | 0,01245    |
| TcCLB.508283.60  | retrotransposon hot spot protein (RHS, pseudogene), puta    | 0,6312 | 0,01344    |
| TcCLB.504765.9   | hypothetical protein, conserved (fragment)                  | 0,6308 | 1,49E-09   |
| TcCLB.510149.50  | tfiih basal transcription factor complex helicase xpb subur | 0,6307 | 2,944E-15  |
| TcCLB.506145.70  | hypothetical protein, conserved                             | 0,6306 | 9,375E-07  |
| TcCLB.510127.60  | hypothetical protein, conserved                             | 0,6304 | 0,00000153 |
| TcCLB.510615.10  | hypothetical protein, conserved                             | 0,6303 | 9,758E-10  |
| TcCLB.504047.40  | kinesin, putative                                           | 0,6302 | 2,1E-16    |
| TcCLB.511635.20  | histone H2B, putative                                       | 0,6299 | 3,059E-12  |
| TcCLB.510455.10  | dispersed gene family protein 1 (DGF-1), putative           | 0,6299 | 0,1597     |

|                  |                                                           |        |            |
|------------------|-----------------------------------------------------------|--------|------------|
| TcCLB.507093.100 | hypothetical protein, conserved                           | 0,6296 | 2,557E-09  |
| TcCLB.509139.10  | glycerate kinase, putative                                | 0,6292 | 3,778E-16  |
| TcCLB.506007.20  | RNA editing complex protein MP18, putative                | 0,6292 | 3,182E-07  |
| TcCLB.511261.4   | P-type H -ATPase, putative (fragment)                     | 0,629  | 8,719E-15  |
| TcCLB.509207.70  | hypothetical protein, conserved                           | 0,6289 | 2,156E-08  |
| TcCLB.506685.30  | thymidylate kinase, putative                              | 0,6289 | 5,772E-07  |
| TcCLB.511303.160 | sodium/hydrogen exchanger, putative (FTP)                 | 0,6288 | 5,006E-08  |
| TcCLB.506247.24  | hypothetical protein, conserved                           | 0,6287 | 0,001041   |
| TcCLB.508689.30  | hypothetical protein, conserved                           | 0,6286 | 3,1E-09    |
| TcCLB.511069.10  | 40S ribosomal protein S8, putative                        | 0,6284 | 2,522E-08  |
| TcCLB.508543.20  | protein kinase, putative                                  | 0,6283 | 1,59E-10   |
| TcCLB.506781.50  | dispersed gene family protein 1 (DGF-1), putative         | 0,6283 | 0,02615    |
| TcCLB.510119.9   | elongation factor 1-alpha, putative                       | 0,628  | 2,973E-20  |
| TcCLB.509271.10  | trans-sialidase, putative                                 | 0,6279 | 4,552E-07  |
| TcCLB.503531.49  | structural maintenance of chromosome 3, putative          | 0,6274 | 0,002105   |
| TcCLB.503939.60  | hypothetical protein, conserved                           | 0,6272 | 3,858E-10  |
| TcCLB.506989.130 | hypothetical protein, conserved                           | 0,6271 | 5,706E-12  |
| TcCLB.509683.100 | hypothetical protein, conserved                           | 0,6271 | 1,331E-07  |
| TcCLB.510087.30  | dihydroceramide synthase, putative (DHCS)                 | 0,627  | 4,762E-09  |
| TcCLB.511625.20  | hypothetical protein, conserved                           | 0,6267 | 7,559E-06  |
| TcCLB.505919.80  | retrotransposon hot spot (RHS) protein, putative          | 0,6266 | 1,683E-08  |
| TcCLB.511545.180 | hypothetical protein, conserved                           | 0,6265 | 1,061E-10  |
| TcCLB.509245.10  | hypothetical protein, conserved                           | 0,6265 | 1,354E-06  |
| TcCLB.507951.299 | 5-histidylcysteine sulfoxide synthase                     | 0,6264 | 1,831E-12  |
| TcCLB.509965.420 | hypothetical protein, conserved                           | 0,6264 | 7,374E-08  |
| TcCLB.427237.9   | dispersed gene family protein 1 (DGF-1), putative         | 0,6263 | 0,1156     |
| TcCLB.507007.76  | receptor protein kinase, putative                         | 0,6261 | 0,00001851 |
| TcCLB.503779.109 | hypothetical protein, conserved (fragment)                | 0,6258 | 0,00000199 |
| TcCLB.504625.74  | hypothetical protein, conserved                           | 0,6258 | 0,002316   |
| TcCLB.506389.79  | calmodulin, putative                                      | 0,6257 | 0,4371     |
| TcCLB.507809.30  | ribose-phosphate pyrophosphokinase, putative              | 0,6256 | 1,238E-13  |
| TcCLB.510529.10  | hypothetical protein, conserved                           | 0,6256 | 0,0000644  |
| TcCLB.506173.150 | hypothetical protein                                      | 0,6254 | 0,03855    |
| TcCLB.507017.140 | mitochondrial RNA binding protein 1, putative             | 0,6253 | 8,984E-12  |
| TcCLB.511523.14  | succinate dehydrogenase cytochrome B subunit              | 0,6247 | 5,823E-06  |
| TcCLB.504035.120 | hypothetical protein, conserved                           | 0,6246 | 1,024E-12  |
| TcCLB.506855.120 | hypothetical protein, conserved                           | 0,6242 | 3,117E-10  |
| TcCLB.510859.30  | hypothetical protein, conserved                           | 0,624  | 3,382E-17  |
| TcCLB.506789.120 | hypothetical protein, conserved                           | 0,624  | 2,759E-11  |
| TcCLB.506869.40  | mitochondrial RNA binding complex 1 subunit, putative     | 0,624  | 7,556E-08  |
| TcCLB.508461.470 | hypothetical protein, conserved                           | 0,6239 | 1,436E-08  |
| TcCLB.506957.23  | hypothetical protein, conserved                           | 0,6237 | 4,227E-11  |
| TcCLB.511837.29  | iron-sulfur cluster assembly protein, putative            | 0,6237 | 9,833E-08  |
| TcCLB.509803.30  | hypothetical protein, conserved                           | 0,6236 | 1,18E-09   |
| TcCLB.507379.9   | dispersed gene family protein 1 (DGF-1), putative (fragme | 0,6236 | 0,009597   |

|                  |                                                           |        |            |
|------------------|-----------------------------------------------------------|--------|------------|
| TcCLB.503687.40  | 40 kDa cyclophilin, putative (CYP40)                      | 0,6235 | 4,737E-13  |
| TcCLB.509005.60  | hypothetical protein, conserved                           | 0,6234 | 5,327E-08  |
| TcCLB.507769.20  | hypothetical protein, conserved                           | 0,6232 | 0,0001273  |
| TcCLB.504105.20  | eukaryotic translation initiation factor 5, putative      | 0,6231 | 3,193E-14  |
| TcCLB.504029.90  | hypothetical protein, conserved                           | 0,6225 | 0,00000385 |
| TcCLB.510483.340 | beta galactofuranosyl glycosyltransferase (pseudogene), f | 0,6224 | 0,01149    |
| TcCLB.506523.9   | dispersed gene family protein 1 (DGF-1), putative         | 0,6224 | 0,02012    |
| TcCLB.508847.9   | dispersed gene family protein 1 (DGF-1), putative         | 0,6222 | 0,1614     |
| TcCLB.504393.10  | hypothetical protein                                      | 0,622  | 0,1051     |
| TcCLB.503663.20  | hypothetical protein, conserved                           | 0,6217 | 6,131E-11  |
| TcCLB.508169.110 | hypothetical protein, conserved                           | 0,6215 | 0,00004004 |
| TcCLB.506047.10  | hypothetical protein, conserved (pseudogene)              | 0,6214 | 0,004809   |
| TcCLB.511477.10  | trans-sialidase (pseudogene), putative                    | 0,6212 | 0,1969     |
| TcCLB.509267.40  | hypothetical protein, conserved                           | 0,6211 | 2,275E-09  |
| TcCLB.509607.70  | serine/threonine protein kinase, putative                 | 0,621  | 0,0003631  |
| TcCLB.506927.20  | hypothetical protein, conserved                           | 0,6209 | 0,00001793 |
| TcCLB.511563.9   | dispersed gene family protein 1 (DGF-1), putative         | 0,6209 | 0,04509    |
| TcCLB.504109.150 | elongation factor, putative                               | 0,6208 | 9,248E-13  |
| TcCLB.506533.70  | hypothetical protein, conserved                           | 0,6208 | 1,461E-07  |
| TcCLB.505999.80  | hypothetical protein, conserved                           | 0,6208 | 2,476E-06  |
| TcCLB.510897.10  | cullin 2, putative                                        | 0,6202 | 1,041E-06  |
| TcCLB.506835.120 | DNA ligase I, putative                                    | 0,6201 | 7,798E-12  |
| TcCLB.508153.990 | hypothetical protein, conserved                           | 0,6201 | 1,689E-06  |
| TcCLB.506625.240 | hypothetical protein, conserved                           | 0,62   | 4,372E-12  |
| TcCLB.508041.60  | eukaryotic release factor 3, putative                     | 0,6199 | 5,776E-14  |
| TcCLB.510437.79  | heat shock protein 70, putative                           | 0,6199 | 0,00005922 |
| TcCLB.507017.10  | hypothetical protein, conserved                           | 0,6198 | 2,63E-11   |
| TcCLB.508331.90  | retrotransposon hot spot protein (RHS, pseudogene), puta  | 0,6196 | 9,527E-07  |
| TcCLB.508175.329 | 60S ribosomal protein L19, putative                       | 0,6195 | 7,118E-09  |
| TcCLB.507809.150 | hypothetical protein, conserved                           | 0,6194 | 1,58E-07   |
| TcCLB.509011.50  | hypothetical protein, conserved                           | 0,6188 | 5,553E-14  |
| TcCLB.510087.110 | hypothetical protein, conserved                           | 0,6188 | 1,654E-10  |
| TcCLB.511807.160 | hypothetical protein, conserved                           | 0,6188 | 0,0001944  |
| TcCLB.506933.40  | DNA replication licensing factor MCM2, putative           | 0,6185 | 4,071E-10  |
| TcCLB.506677.10  | ubiquitin-like protein, putative                          | 0,6183 | 1,227E-12  |
| TcCLB.508517.9   | dispersed gene family protein 1 (DGF-1), putative         | 0,6183 | 0,007884   |
| TcCLB.507811.40  | hypothetical protein, conserved                           | 0,6182 | 1,55E-10   |
| TcCLB.407477.10  | thiolase protein-like protein, putative                   | 0,6182 | 1,313E-06  |
| TcCLB.510689.30  | proteasome beta 7 subunit, putative                       | 0,6181 | 1,358E-11  |
| TcCLB.509033.30  | cyclophilin, putative                                     | 0,6181 | 6,595E-06  |
| TcCLB.508323.199 | ATP-dependent DEAD/H RNA helicase, putative (fragment     | 0,6181 | 0,00009006 |
| TcCLB.509901.120 | hypothetical protein, conserved                           | 0,6179 | 6,669E-06  |
| TcCLB.511209.60  | hypothetical protein, conserved                           | 0,6176 | 6,645E-08  |
| TcCLB.506559.200 | thioredoxin, putative                                     | 0,6174 | 1,237E-15  |
| TcCLB.511535.20  | hypothetical protein, conserved                           | 0,6174 | 1,095E-07  |

|                   |                                                             |        |            |
|-------------------|-------------------------------------------------------------|--------|------------|
| TcCLB.510329.330  | hypothetical protein, conserved                             | 0,6173 | 3,643E-07  |
| TcCLB.511145.70   | centromere/microtubule binding protein cbf5, putative       | 0,6172 | 9,494E-12  |
| TcCLB.509317.90   | hypothetical protein, conserved                             | 0,617  | 4,29E-07   |
| TcCLB.506125.30   | phosphoglycerate kinase, putative                           | 0,6169 | 8,493E-07  |
| TcCLB.511001.18   | 40S ribosomal protein S3A, putative                         | 0,6169 | 0,0005051  |
| TcCLB.509631.30   | mucin TcMUCII (pseudogene), putative                        | 0,6168 | 0,08395    |
| TcCLB.509429.160  | hypothetical protein                                        | 0,6167 | 3,208E-11  |
| TcCLB.506241.100  | 60S ribosomal protein L32, putative                         | 0,6165 | 1,236E-15  |
| TcCLB.506629.100  | hypothetical protein                                        | 0,6163 | 5,234E-09  |
| TcCLB.509153.110  | hypothetical protein                                        | 0,6161 | 1,294E-10  |
| TcCLB.507031.29   | nucleosome assembly protein, putative                       | 0,6159 | 7,228E-11  |
| TcCLB.507643.50   | dispersed gene family protein 1 (DGF-1), putative           | 0,6155 | 0,00007203 |
| TcCLB.507603.40   | proteasome beta-1 subunit, putative                         | 0,6153 | 7,389E-10  |
| TcCLB.510899.59   | hypothetical protein, conserved                             | 0,6152 | 7,133E-11  |
| TcCLB.508241.60   | phosphoadenosine phosphosulfate reductase-like protein,     | 0,6151 | 1,012E-10  |
| TcCLB.508629.10   | dispersed gene family protein 1 (DGF-1), putative           | 0,6151 | 0,00005433 |
| TcCLB.506977.30   | hypothetical protein, conserved                             | 0,615  | 9,654E-09  |
| TcCLB.509337.15   | hypothetical protein, conserved                             | 0,6149 | 1,267E-10  |
| TcCLB.503661.20   | retrotransposon hot spot (RHS) protein, putative            | 0,6148 | 0,03556    |
| TcCLB.506129.30   | trans-sialidase, Group II, putative                         | 0,6147 | 1,122E-07  |
| TcCLB.508153.1120 | DNA repair helicase, putative                               | 0,6144 | 1,369E-07  |
| TcCLB.511889.50   | retrotransposon hot spot protein (RHS, pseudogene), puta    | 0,6143 | 1,965E-07  |
| TcCLB.510155.170  | hypothetical protein, conserved                             | 0,6143 | 0,00001665 |
| TcCLB.506633.10   | protein kinase, putative                                    | 0,6143 | 0,0001933  |
| TcCLB.511395.30   | protein phosphatase 2A, regulatory subunit B, putative      | 0,6139 | 1,913E-15  |
| TcCLB.503723.20   | hypothetical protein, conserved                             | 0,6139 | 0,00001118 |
| TcCLB.508507.50   | hypothetical protein, conserved                             | 0,6136 | 0,00007846 |
| TcCLB.510283.114  | DNA-directed RNA polymerase I subunit, putative             | 0,6135 | 0,00001299 |
| TcCLB.510733.10   | p21-activated kinase 3, putative                            | 0,6133 | 2,351E-15  |
| TcCLB.506813.130  | beta galactofuranosyl glycosyltransferase (pseudogene), f   | 0,6133 | 0,1084     |
| TcCLB.506469.100  | hypothetical protein, conserved                             | 0,6132 | 2,306E-12  |
| TcCLB.510659.264  | prenyl protein specific carboxyl methyltransferase, putativ | 0,6132 | 0,00001388 |
| TcCLB.510409.39   | ubiquitin/ribosomal protein S27a, putative                  | 0,6131 | 5,255E-18  |
| TcCLB.506127.30   | phenylalanyl-tRNA synthetase, putative                      | 0,613  | 3,186E-16  |
| TcCLB.511577.44   | hypothetical protein, conserved                             | 0,613  | 0,0003389  |
| TcCLB.504109.189  | hypothetical protein                                        | 0,613  | 0,09464    |
| TcCLB.511575.40   | hypothetical protein, conserved                             | 0,6129 | 5,489E-12  |
| TcCLB.507969.30   | sphingosine-1-phosphate phosphatase, putative               | 0,6126 | 1,656E-09  |
| TcCLB.511683.10   | hypothetical protein                                        | 0,6126 | 0,0004932  |
| TcCLB.508521.30   | beta galactofuranosyl glycosyltransferase (pseudogene), f   | 0,6122 | 0,0002246  |
| TcCLB.503565.10   | hypothetical protein                                        | 0,6121 | 0,00001466 |
| TcCLB.508741.160  | hypothetical protein, conserved                             | 0,612  | 1,134E-11  |
| TcCLB.504257.20   | hypothetical protein, conserved                             | 0,6116 | 3,598E-09  |
| TcCLB.504017.10   | Nascent polypeptide-associated complex subunit beta, pu     | 0,6116 | 1,175E-08  |
| TcCLB.510197.110  | dispersed gene family protein 1 (DGF-1), putative           | 0,6115 | 0,002902   |

|                  |                                                               |        |            |
|------------------|---------------------------------------------------------------|--------|------------|
| TcCLB.506947.40  | peroxisome assembly protein, putative                         | 0,6114 | 2,522E-09  |
| TcCLB.508281.9   | dispersed gene family protein 1 (DGF-1), putative             | 0,6113 | 0,07891    |
| TcCLB.511247.18  | 50S ribosomal protein L16, putative                           | 0,6108 | 2,078E-06  |
| TcCLB.511667.30  | trans-sialidase, Group I, putative                            | 0,6107 | 0,1986     |
| TcCLB.507099.120 | hypothetical protein, conserved                               | 0,6105 | 3,651E-12  |
| TcCLB.511309.70  | hypothetical protein, conserved                               | 0,6105 | 1,319E-09  |
| TcCLB.511621.30  | hypothetical protein, conserved                               | 0,6105 | 0,00001512 |
| TcCLB.507207.19  | FtsJ cell division protein, putative (fragment)               | 0,6104 | 8,97E-19   |
| TcCLB.511279.10  | hypothetical protein, conserved                               | 0,6103 | 0,00001759 |
| TcCLB.510595.30  | hypothetical protein                                          | 0,61   | 0,0004172  |
| TcCLB.510897.70  | glycerophosphoryl diester phosphodiesterase (pseudogene)      | 0,6099 | 9,612E-06  |
| TcCLB.511575.90  | hypothetical protein                                          | 0,6099 | 0,0000442  |
| TcCLB.506529.60  | hypothetical protein, conserved                               | 0,6099 | 0,00006284 |
| TcCLB.509997.20  | tryparedoxin 2, putative (TXN2)                               | 0,6098 | 3,079E-11  |
| TcCLB.509025.20  | hypothetical protein, conserved                               | 0,6097 | 0,0001761  |
| TcCLB.511389.40  | hypothetical protein, conserved                               | 0,6096 | 1,082E-12  |
| TcCLB.510377.270 | retrotransposon hot spot protein (RHS, pseudogene), putative  | 0,6095 | 0,01258    |
| TcCLB.504075.6   | dual specificity protein phosphatase, putative                | 0,6093 | 1,481E-06  |
| TcCLB.506787.9   | dispersed gene family protein 1 (DGF-1), putative (fragment)  | 0,6093 | 0,1546     |
| TcCLB.505183.130 | sugar transporter, putative                                   | 0,6088 | 0,0008805  |
| TcCLB.511231.50  | aminomethyltransferase, mitochondrial, putative (GCV)         | 0,6086 | 8,625E-08  |
| TcCLB.507937.40  | elongation factor 1-gamma (EF-1-gamma), putative              | 0,6086 | 0,1619     |
| TcCLB.510741.229 | ubiquitin-activating enzyme E1, putative                      | 0,6084 | 7,981E-09  |
| TcCLB.510797.39  | hypothetical protein, conserved                               | 0,6083 | 0,0001506  |
| TcCLB.511929.20  | dispersed gene family protein 1 (DGF-1, pseudogene), putative | 0,6081 | 0,001944   |
| TcCLB.507027.50  | Present in the outer mitochondrial membrane proteome          | 0,608  | 5,981E-07  |
| TcCLB.510295.30  | RNA editing complex protein MP18, putative                    | 0,6079 | 5,672E-08  |
| TcCLB.504011.80  | hypothetical protein, conserved                               | 0,6079 | 0,0001862  |
| TcCLB.508503.100 | hypothetical protein, conserved                               | 0,6078 | 0,00007881 |
| TcCLB.507473.10  | hypothetical protein                                          | 0,6073 | 3,949E-12  |
| TcCLB.510119.20  | elongation factor 1-alpha, putative                           | 0,6072 | 1,96E-14   |
| TcCLB.510421.80  | hypothetical protein                                          | 0,6072 | 0,0004168  |
| TcCLB.506811.170 | hypothetical protein, conserved                               | 0,6071 | 2,613E-11  |
| TcCLB.506467.40  | serine/threonine protein kinase, putative                     | 0,6068 | 1,632E-09  |
| TcCLB.509997.30  | tryparedoxin 1, putative (TXN1)                               | 0,6068 | 4,958E-06  |
| TcCLB.511089.5   | trans-sialidase (pseudogene), putative                        | 0,6062 | 0,2446     |
| TcCLB.511525.20  | hypothetical protein, conserved                               | 0,6061 | 7,151E-10  |
| TcCLB.509029.130 | cyclin 1 (CYC1)                                               | 0,6061 | 1,421E-06  |
| TcCLB.510151.10  | fatty acyl CoA synthetase 1, putative                         | 0,6061 | 1,709E-06  |
| TcCLB.511003.180 | hypothetical protein, conserved                               | 0,606  | 0,0002506  |
| TcCLB.506531.50  | metacaspase, putative                                         | 0,6055 | 2,254E-06  |
| TcCLB.506015.20  | surface protease GP63, putative                               | 0,6054 | 0,0000181  |
| TcCLB.507047.80  | zinc-finger protein ZPR1, putative                            | 0,6053 | 2,194E-06  |
| TcCLB.506173.140 | dispersed gene family protein 1 (DGF-1), putative             | 0,6053 | 0,0008414  |
| TcCLB.511211.180 | hypothetical protein, conserved                               | 0,6051 | 6,086E-09  |

|                  |                                                                  |        |            |
|------------------|------------------------------------------------------------------|--------|------------|
| TcCLB.509905.130 | dispersed gene family protein 1 (DGF-1, pseudogene), putative    | 0,605  | 1,704E-09  |
| TcCLB.511389.150 | thiolase protein-like protein, putative                          | 0,6047 | 2,271E-14  |
| TcCLB.506057.20  | retrotransposon hot spot protein (RHS, pseudogene), putative     | 0,6046 | 0,00008635 |
| TcCLB.511521.40  | hypothetical protein, conserved                                  | 0,6044 | 1,569E-06  |
| TcCLB.508813.70  | hypothetical protein, conserved                                  | 0,6043 | 2,239E-08  |
| TcCLB.506559.190 | dual specificity protein phosphatase, putative                   | 0,6042 | 2,014E-08  |
| TcCLB.506557.10  | hypothetical protein, conserved                                  | 0,604  | 4,185E-07  |
| TcCLB.508323.94  | cyclophilin, putative                                            | 0,604  | 0,0003353  |
| TcCLB.506113.60  | retrotransposon hot spot (RHS) protein, putative                 | 0,6039 | 3,479E-16  |
| TcCLB.508601.10  | mitochondrial DEAD box protein, putative                         | 0,6039 | 0,00004751 |
| TcCLB.507033.4   | hypothetical protein, conserved                                  | 0,6037 | 0,0006032  |
| TcCLB.511191.19  | ras-related protein Rab21, putative                              | 0,6036 | 2,379E-07  |
| TcCLB.506789.110 | hypothetical protein                                             | 0,6035 | 3,719E-09  |
| TcCLB.508837.147 | kinesin, putative                                                | 0,6034 | 1,542E-08  |
| TcCLB.511507.120 | hypothetical protein, conserved                                  | 0,6034 | 2,671E-06  |
| TcCLB.508857.160 | threonine synthase, putative                                     | 0,6032 | 5,754E-10  |
| TcCLB.507609.30  | ATP-dependent DEAD/H RNA helicase, putative                      | 0,6032 | 2,153E-06  |
| TcCLB.504143.30  | kinesin protein (pseudogene), putative                           | 0,6032 | 8,795E-06  |
| TcCLB.508307.184 | hypothetical protein, conserved                                  | 0,6032 | 0,0001302  |
| TcCLB.505945.50  | ATP-dependent chaperone, putative                                | 0,6031 | 4,036E-09  |
| TcCLB.418113.9   | dispersed gene family protein 1 (DGF-1), putative                | 0,6029 | 0,203      |
| TcCLB.506563.10  | pumilio/PUF RNA binding protein 9, putative (PUF9)               | 0,6028 | 3,851E-08  |
| TcCLB.509875.160 | dispersed gene family protein 1 (DGF-1), putative                | 0,6028 | 0,0001954  |
| TcCLB.508831.63  | hypothetical protein                                             | 0,6027 | 1,486E-07  |
| TcCLB.510165.70  | retrotransposon hot spot protein (RHS, pseudogene), putative     | 0,6027 | 0,004211   |
| TcCLB.510397.10  | hypothetical protein, conserved                                  | 0,6025 | 1,891E-09  |
| TcCLB.511111.30  | hypothetical protein, conserved                                  | 0,6025 | 9,608E-08  |
| TcCLB.506337.200 | hypothetical protein, conserved                                  | 0,6023 | 2,38E-12   |
| TcCLB.509741.40  | hypothetical protein, conserved                                  | 0,6022 | 0,00007196 |
| TcCLB.508221.284 | retrotransposon hot spot protein (RHS, pseudogene), putative     | 0,6022 | 0,02914    |
| TcCLB.503981.30  | hypothetical protein, conserved                                  | 0,6021 | 3,06E-08   |
| TcCLB.510359.130 | hypothetical protein, conserved                                  | 0,6021 | 4,727E-06  |
| TcCLB.508325.220 | beta galactofuranosyl glycosyltransferase (pseudogene), putative | 0,602  | 7,644E-08  |
| TcCLB.511391.170 | hypothetical protein, conserved                                  | 0,6016 | 9,282E-08  |
| TcCLB.507809.70  | small ubiquitin protein, putative                                | 0,6016 | 0,00003537 |
| TcCLB.506417.30  | hypothetical protein, conserved                                  | 0,6016 | 0,0000622  |
| TcCLB.510359.160 | hypothetical protein, conserved                                  | 0,6016 | 0,0001863  |
| TcCLB.511731.60  | glutamyl-tRNA synthetase, putative                               | 0,6011 | 3,452E-09  |
| TcCLB.510667.110 | hypothetical protein, conserved                                  | 0,6011 | 3,213E-06  |
| TcCLB.509677.10  | hypothetical protein, conserved                                  | 0,601  | 2,194E-07  |
| TcCLB.503527.20  | hypothetical protein, conserved                                  | 0,6008 | 2,896E-07  |
| TcCLB.507011.130 | hypothetical protein, conserved                                  | 0,6007 | 1,853E-07  |
| TcCLB.511649.150 | phosphoglycerate mutase protein, putative                        | 0,6006 | 2,075E-07  |
| TcCLB.508607.40  | retrotransposon hot spot protein (RHS, pseudogene), putative     | 0,6003 | 1,253E-08  |
| TcCLB.485889.4   | hypothetical protein, conserved                                  | 0,6001 | 0,0009556  |



|                  |                                                            |        |            |
|------------------|------------------------------------------------------------|--------|------------|
| TcCLB.509029.10  | serine/threonine protein phosphatase, putative             | 0,5997 | 2,212E-06  |
| TcCLB.508593.140 | hypothetical protein, conserved                            | 0,5996 | 1,1E-08    |
| TcCLB.511825.4   | hypothetical protein, conserved (fragment)                 | 0,5991 | 1,199E-07  |
| TcCLB.503999.60  | phosphoprotein phosphatase, putative                       | 0,599  | 1,555E-08  |
| TcCLB.503925.50  | hypothetical protein, conserved                            | 0,5985 | 5,733E-06  |
| TcCLB.503823.104 | UDP-N-acetylglucosamine-dolichyl-phosphate N-acetylglu     | 0,5984 | 2,619E-06  |
| TcCLB.507891.47  | flagellar calcium-binding protein, putative                | 0,5983 | 1,201E-07  |
| TcCLB.508567.89  | hypothetical protein, conserved                            | 0,5981 | 3,685E-07  |
| TcCLB.510719.10  | vacuolar protein sorting-associated protein-like, putative | 0,598  | 5,557E-09  |
| TcCLB.511909.10  | hypothetical protein, conserved                            | 0,5978 | 8,121E-14  |
| TcCLB.509203.50  | hypothetical protein                                       | 0,5976 | 8,486E-10  |
| TcCLB.503899.70  | hypothetical protein                                       | 0,5973 | 0,0001963  |
| TcCLB.511665.30  | retrotransposon hot spot protein (RHS, pseudogene), puta   | 0,5972 | 0,0003317  |
| TcCLB.508357.80  | cation transporter protein, putative                       | 0,597  | 2,283E-06  |
| TcCLB.503893.90  | hypothetical protein, conserved                            | 0,597  | 7,898E-06  |
| TcCLB.509843.10  | retrotransposon hot spot (RHS) protein, putative           | 0,5964 | 3,838E-08  |
| TcCLB.508665.14  | heat shock protein, putative                               | 0,5963 | 3,83E-11   |
| TcCLB.507645.40  | hypothetical protein, conserved                            | 0,5963 | 1,179E-10  |
| TcCLB.510165.30  | hypothetical protein, conserved                            | 0,5963 | 8,954E-10  |
| TcCLB.508731.20  | hypothetical protein, conserved                            | 0,5963 | 4,197E-06  |
| TcCLB.410199.20  | hypothetical protein                                       | 0,5963 | 0,01278    |
| TcCLB.507253.50  | ATP-dependent DEAD/H RNA helicase (pseudogene), puta       | 0,5963 | 0,1983     |
| TcCLB.482319.10  | hypothetical protein, conserved                            | 0,5961 | 9,738E-08  |
| TcCLB.510259.24  | hypothetical protein, conserved                            | 0,5961 | 0,00009646 |
| TcCLB.506989.150 | hypothetical protein, conserved                            | 0,596  | 1,785E-08  |
| TcCLB.511353.30  | hypothetical protein, conserved                            | 0,596  | 0,0001337  |
| TcCLB.506303.50  | UDP-galactose 4-epimerase, putative                        | 0,5958 | 7,556E-08  |
| TcCLB.511289.59  | Multiprotein-bridging factor 1, putative (mbf1)            | 0,5955 | 7,165E-09  |
| TcCLB.511737.9   | hypothetical protein, conserved                            | 0,5955 | 0,007093   |
| TcCLB.506331.80  | beta galactofuranosyl glycosyltransferase (pseudogene), f  | 0,5955 | 0,0301     |
| TcCLB.508221.52  | hypothetical protein                                       | 0,5954 | 0,1518     |
| TcCLB.510729.290 | Enriched in surface-labeled proteome protein 19 (SLS3)     | 0,5953 | 1,902E-08  |
| TcCLB.509875.20  | dispersed gene family protein 1 (DGF-1), putative          | 0,5952 | 0,002062   |
| TcCLB.511797.220 | dispersed gene family protein 1 (DGF-1), putative          | 0,5952 | 0,03518    |
| TcCLB.511807.40  | hypothetical protein, conserved                            | 0,5951 | 5,403E-07  |
| TcCLB.509951.40  | hypothetical protein                                       | 0,5951 | 0,002986   |
| TcCLB.508641.10  | dispersed gene family protein 1 (DGF-1), putative          | 0,595  | 0,06897    |
| TcCLB.505975.20  | trans-sialidase, Group IV, putative                        | 0,5949 | 0,00001759 |
| TcCLB.509651.10  | hypothetical protein, conserved                            | 0,5949 | 0,00007956 |
| TcCLB.507971.20  | syntaxin binding protein (pseudogene), putative            | 0,5948 | 5,584E-12  |
| TcCLB.506485.40  | kinesin (pseudogene), putative                             | 0,5947 | 1,676E-14  |
| TcCLB.506635.130 | hypothetical protein, conserved                            | 0,5945 | 4,082E-08  |
| TcCLB.506037.10  | dispersed gene family protein 1 (DGF-1, pseudogene), put   | 0,5945 | 0,1109     |
| TcCLB.505989.82  | ruvB-like DNA helicase, putative                           | 0,5943 | 7,718E-09  |
| TcCLB.506939.70  | retrotransposon hot spot protein (RHS, pseudogene), puta   | 0,5942 | 0,01328    |

|                   |                                                           |        |            |
|-------------------|-----------------------------------------------------------|--------|------------|
| TcCLB.511255.313  | syntaxin binding protein (pseudogene), putative           | 0,5942 | 0,06826    |
| TcCLB.510307.110  | hypothetical protein, conserved (pseudogene)              | 0,5941 | 3,147E-10  |
| TcCLB.511015.20   | ribosomal protein S29, putative                           | 0,594  | 0,00001059 |
| TcCLB.511715.100  | pumilio/PUF RNA binding protein 7, putative (PUF7)        | 0,5935 | 1,334E-09  |
| TcCLB.506697.60   | hypothetical protein, conserved                           | 0,5933 | 7,444E-14  |
| TcCLB.509857.30   | hypothetical protein, conserved                           | 0,5928 | 4,032E-07  |
| TcCLB.506605.100  | hypothetical protein                                      | 0,5928 | 5,704E-07  |
| TcCLB.506559.50   | hypothetical protein, conserved                           | 0,5927 | 1,748E-09  |
| TcCLB.503495.20   | retrotransposon hot spot protein (RHS, pseudogene), puta  | 0,5926 | 0,002333   |
| TcCLB.511419.50   | 3-phosphoglycerate kinase, glycosomal (PGKA)              | 0,5925 | 0,00004592 |
| TcCLB.509671.80   | 60S ribosomal protein L5, putative                        | 0,5922 | 5,229E-16  |
| TcCLB.504003.90   | hypothetical protein, conserved                           | 0,5922 | 3,085E-07  |
| TcCLB.507611.30   | glycine dehydrogenase (pseudogene), putative              | 0,5922 | 0,02335    |
| TcCLB.506559.550  | C2 domain containing protein, putative                    | 0,5921 | 3,376E-08  |
| TcCLB.507483.30   | calmodulin, putative                                      | 0,592  | 3,795E-07  |
| TcCLB.503891.54   | nucleolar RNA-binding protein, putative                   | 0,592  | 0,00006181 |
| TcCLB.506173.190  | dispersed gene family protein 1 (DGF-1), putative         | 0,5919 | 0,01412    |
| TcCLB.507641.110  | hypothetical protein, conserved                           | 0,5917 | 5,704E-10  |
| TcCLB.505999.100  | 3-phosphoglycerate kinase, glycosomal (PGKA)              | 0,5916 | 1,792E-08  |
| TcCLB.511025.120  | CYC2-like cyclin, putative                                | 0,5915 | 4,203E-09  |
| TcCLB.511827.139  | retrotransposon hot spot protein (RHS, pseudogene), puta  | 0,5914 | 0,01251    |
| TcCLB.507513.110  | hypothetical protein                                      | 0,5913 | 3,296E-06  |
| TcCLB.402857.10   | hypothetical protein, conserved (fragment)                | 0,5912 | 5,199E-07  |
| TcCLB.507851.40   | hypothetical protein, conserved                           | 0,5911 | 0,00005158 |
| TcCLB.511301.70   | FK506-binding protein (FKBP)-type peptidyl-prolyl isomera | 0,591  | 5,475E-11  |
| TcCLB.507907.40   | hypothetical protein, conserved                           | 0,591  | 3,311E-07  |
| TcCLB.506725.20   | hypothetical protein, conserved                           | 0,5909 | 1,563E-15  |
| TcCLB.510737.70   | 60S ribosomal subunit protein L31, putative               | 0,5908 | 0,0004913  |
| TcCLB.509813.10   | hypothetical protein (pseudogene)                         | 0,5907 | 0,07764    |
| TcCLB.506357.140  | Periodic tryptophan protein 2 homolog, putative           | 0,5906 | 3,577E-09  |
| TcCLB.508037.10   | retrotransposon hot spot (RHS) protein, putative          | 0,5906 | 5,283E-07  |
| TcCLB.510143.17   | hypothetical protein, conserved                           | 0,5903 | 6,167E-06  |
| TcCLB.510515.90   | hypothetical protein, conserved                           | 0,5903 | 0,00003232 |
| TcCLB.506779.100  | RNA-binding protein, putative                             | 0,5902 | 6,986E-06  |
| TcCLB.507023.10   | epsilon-adaptin, putative                                 | 0,59   | 9,121E-13  |
| TcCLB.508515.120  | hypothetical protein, conserved                           | 0,5899 | 5,863E-07  |
| TcCLB.507737.40   | hypothetical protein, conserved (fragment)                | 0,5899 | 0,09238    |
| TcCLB.509471.68   | histone H3, putative                                      | 0,5898 | 3,175E-09  |
| TcCLB.506153.6    | hypothetical protein, conserved                           | 0,5896 | 0,00001164 |
| TcCLB.509965.144  | hypothetical protein, conserved                           | 0,5895 | 1,175E-06  |
| TcCLB.510155.80   | mitochondrial-processing peptidase subunit beta, putative | 0,5893 | 1,171E-12  |
| TcCLB.508153.1074 | hypothetical protein, conserved                           | 0,5893 | 2,064E-08  |
| TcCLB.504431.20   | hypothetical protein                                      | 0,5893 | 0,00001995 |
| TcCLB.507149.20   | retrotransposon hot spot protein (RHS, pseudogene), puta  | 0,5892 | 0,03187    |
| TcCLB.508569.140  | hypothetical protein, conserved                           | 0,5891 | 3,385E-06  |

|                  |                                                            |        |            |
|------------------|------------------------------------------------------------|--------|------------|
| TcCLB.507167.41  | ATP-dependent DEAD/H RNA helicase (pseudogene), puta       | 0,5891 | 0,148      |
| TcCLB.511571.40  | hypothetical protein, conserved                            | 0,5889 | 4,682E-10  |
| TcCLB.506567.60  | ABC transporter, putative                                  | 0,5889 | 1,496E-09  |
| TcCLB.506625.19  | dispersed gene family protein 1 (DGF-1), putative (fragme  | 0,5886 | 0,03035    |
| TcCLB.503521.89  | mannosyltransferase-II, putative                           | 0,5885 | 3,203E-08  |
| TcCLB.503583.80  | dual specificity protein phosphatase or MAP kinase phosph  | 0,5885 | 7,155E-07  |
| TcCLB.506335.60  | mucin TcMUCII (pseudogene), putative                       | 0,5884 | 0,002892   |
| TcCLB.506941.130 | hypothetical protein, conserved                            | 0,5883 | 3,822E-08  |
| TcCLB.511693.70  | hypothetical protein, conserved                            | 0,5883 | 0,00001768 |
| TcCLB.511865.80  | hypothetical protein, conserved                            | 0,5882 | 0,0007933  |
| TcCLB.511385.70  | hypothetical protein                                       | 0,5881 | 0,01087    |
| TcCLB.508307.150 | hypothetical protein, conserved                            | 0,5877 | 1,381E-07  |
| TcCLB.510879.220 | hypothetical protein, conserved                            | 0,5874 | 1,162E-06  |
| TcCLB.506419.69  | hypothetical protein, conserved                            | 0,5874 | 0,0003879  |
| TcCLB.508139.40  | retrotransposon hot spot protein (RHS, pseudogene), puta   | 0,5871 | 2,924E-07  |
| TcCLB.510531.54  | small nuclear ribonucleoprotein, putative                  | 0,5869 | 3,94E-07   |
| TcCLB.452283.10  | amino acid permease (pseudogene), putative                 | 0,5869 | 0,000522   |
| TcCLB.507011.240 | hypothetical protein, conserved                            | 0,5868 | 0,0001248  |
| TcCLB.507911.40  | hypothetical protein, conserved (pseudogene)               | 0,5867 | 0,00004485 |
| TcCLB.511255.341 | trans-sialidase (pseudogene), putative                     | 0,5867 | 0,04174    |
| TcCLB.511847.50  | hypothetical protein, conserved                            | 0,5865 | 4,733E-09  |
| TcCLB.510641.10  | retrotransposon hot spot protein (RHS, pseudogene), puta   | 0,5865 | 0,002999   |
| TcCLB.506857.110 | hypothetical protein, conserved                            | 0,586  | 0,00002521 |
| TcCLB.506739.50  | ATP-dependent protease ATPase subunit HslU1, putative (    | 0,5859 | 1,383E-12  |
| TcCLB.509055.44  | hypothetical protein, conserved                            | 0,5859 | 5,94E-08   |
| TcCLB.506227.190 | hypothetical protein                                       | 0,5858 | 0,01064    |
| TcCLB.511213.70  | trans-sialidase (pseudogene), putative                     | 0,5857 | 0,000166   |
| TcCLB.510645.30  | 3,2-trans-enoyl-CoA isomerase, mitochondrial precursor, p  | 0,5856 | 1,533E-10  |
| TcCLB.503955.50  | hypothetical protein, conserved                            | 0,5854 | 0,00001667 |
| TcCLB.508817.20  | hypothetical protein                                       | 0,5853 | 4,769E-09  |
| TcCLB.511217.60  | hypothetical protein                                       | 0,5852 | 2,116E-07  |
| TcCLB.509467.20  | hypothetical protein, conserved (pseudogene)               | 0,5852 | 0,04153    |
| TcCLB.509471.59  | histone H3, putative                                       | 0,5851 | 0,004304   |
| TcCLB.510759.114 | hypothetical protein, conserved                            | 0,585  | 3,198E-06  |
| TcCLB.509855.10  | hypothetical protein, conserved                            | 0,5849 | 2,878E-12  |
| TcCLB.506127.150 | hypothetical protein, conserved                            | 0,5847 | 1,281E-09  |
| TcCLB.510105.130 | phosphatidylinositol-4-phosphate 5-kinase type II beta, pu | 0,5847 | 5,019E-07  |
| TcCLB.508777.30  | hypothetical protein, conserved                            | 0,5846 | 4,258E-13  |
| TcCLB.508045.79  | spliceosomal U5 snRNP-specific protein, putative           | 0,5843 | 6,557E-07  |
| TcCLB.509679.9   | leucyl-tRNA synthetase, putative                           | 0,5843 | 0,0003495  |
| TcCLB.511717.90  | phosphomannose isomerase, putative                         | 0,5842 | 2,079E-06  |
| TcCLB.508957.40  | hypothetical protein, conserved (pseudogene)               | 0,5841 | 7,32E-11   |
| TcCLB.510759.130 | hypothetical protein, conserved                            | 0,5841 | 0,00001067 |
| TcCLB.507827.10  | dispersed gene family protein 1 (DGF-1), putative          | 0,5841 | 0,002166   |
| TcCLB.507159.10  | Wee1-like protein kinase, putative (pseudogene, point mu   | 0,5839 | 7,866E-06  |

|                  |                                                                  |        |            |
|------------------|------------------------------------------------------------------|--------|------------|
| TcCLB.507073.40  | hypothetical protein, conserved                                  | 0,5838 | 6,027E-13  |
| TcCLB.508839.70  | hypothetical protein, conserved                                  | 0,5833 | 0,0003547  |
| TcCLB.507769.10  | hypothetical protein, conserved                                  | 0,5828 | 0,02782    |
| TcCLB.510887.50  | hypothetical protein, conserved                                  | 0,5827 | 3,791E-10  |
| TcCLB.510885.20  | hypothetical protein, conserved                                  | 0,5827 | 1,075E-07  |
| TcCLB.508679.20  | ribonuclease inhibitor, putative                                 | 0,5827 | 0,0001054  |
| TcCLB.411427.30  | hypothetical protein, conserved                                  | 0,5824 | 2,709E-09  |
| TcCLB.509735.84  | dispersed gene family protein 1 (DGF-1), putative                | 0,5824 | 0,00002588 |
| TcCLB.507963.44  | hypothetical protein, conserved                                  | 0,5823 | 6,815E-06  |
| TcCLB.505171.40  | hypothetical protein, conserved                                  | 0,5822 | 5,281E-07  |
| TcCLB.511731.70  | hypothetical protein, conserved                                  | 0,5822 | 0,00002899 |
| TcCLB.507609.60  | inositol-3-phosphate synthase, putative                          | 0,5821 | 0,00002648 |
| TcCLB.504371.20  | dispersed gene family protein 1 (DGF-1, pseudogene), putative    | 0,5821 | 0,00577    |
| TcCLB.504423.10  | hypothetical protein, conserved                                  | 0,582  | 0,0003871  |
| TcCLB.511807.150 | hypothetical protein, conserved                                  | 0,5819 | 4,252E-09  |
| TcCLB.511865.54  | protein transport protein Sec61 gamma subunit, putative          | 0,5819 | 1,545E-06  |
| TcCLB.507639.30  | universal minicircle sequence binding protein 1 (pdz5)           | 0,5818 | 0,0002086  |
| TcCLB.474937.9   | acetyl-CoA carboxylase, putative                                 | 0,5817 | 6,162E-09  |
| TcCLB.511907.10  | hypothetical protein, conserved                                  | 0,5817 | 3,171E-07  |
| TcCLB.508555.10  | hypothetical protein, conserved                                  | 0,5817 | 0,0004813  |
| TcCLB.511855.50  | hypothetical protein, conserved                                  | 0,5815 | 2,358E-10  |
| TcCLB.504163.50  | fructose-bisphosphate aldolase, glycosomal, putative             | 0,5814 | 6,943E-06  |
| TcCLB.511289.40  | hypothetical protein, conserved                                  | 0,5812 | 4,566E-12  |
| TcCLB.506207.40  | hypothetical protein, conserved                                  | 0,5812 | 2,174E-11  |
| TcCLB.510971.10  | dispersed gene family protein 1 (DGF-1), putative                | 0,5812 | 0,004629   |
| TcCLB.509885.10  | V-type proton ATPase subunit D, putative (VAd)                   | 0,581  | 2,261E-09  |
| TcCLB.509033.60  | hypothetical protein, conserved                                  | 0,5809 | 4,519E-06  |
| TcCLB.458241.10  | hypothetical protein, conserved                                  | 0,5809 | 0,002312   |
| TcCLB.506629.90  | hypothetical protein, conserved                                  | 0,5809 | 0,009688   |
| TcCLB.511667.40  | retrotransposon hot spot (RHS) protein, putative                 | 0,5808 | 0,001779   |
| TcCLB.506797.20  | hypothetical protein                                             | 0,5807 | 1,429E-13  |
| TcCLB.506529.650 | hypothetical protein, conserved                                  | 0,5806 | 8,975E-08  |
| TcCLB.510639.10  | dispersed gene family protein 1 (DGF-1, pseudogene), putative    | 0,5806 | 0,003791   |
| TcCLB.508625.120 | leucine carboxyl methyltransferase, putative                     | 0,5805 | 2,648E-07  |
| TcCLB.504129.10  | hypothetical protein, conserved                                  | 0,5805 | 0,008669   |
| TcCLB.505401.40  | dispersed gene family protein 1 (DGF-1), putative                | 0,5805 | 0,3082     |
| TcCLB.503865.20  | hypothetical protein, conserved                                  | 0,5804 | 1,546E-08  |
| TcCLB.506867.20  | vacuolar type h ATPase subunit, putative                         | 0,5803 | 3,593E-08  |
| TcCLB.504153.180 | UDP-N-acetylglucosamine pyrophosphorylase, putative              | 0,5799 | 8,056E-09  |
| TcCLB.507949.4   | cytidine triphosphate synthase, putative                         | 0,5799 | 0,00002108 |
| TcCLB.511423.104 | DNA-directed RNA polymerase 2, RPB12 subunit, putative           | 0,5799 | 0,0001741  |
| TcCLB.506575.9   | hypothetical protein, conserved                                  | 0,5797 | 1,047E-09  |
| TcCLB.508079.20  | fatty acyl CoA synthetase 1 (pseudogene), putative               | 0,5794 | 1,457E-08  |
| TcCLB.511107.41  | ATP-dependent Clp protease subunit heat shock protein 1 (Hsp100) | 0,5789 | 0,0001868  |
| TcCLB.506825.219 | hypothetical protein, conserved                                  | 0,5786 | 5,939E-11  |

|                  |                                                                  |        |            |
|------------------|------------------------------------------------------------------|--------|------------|
| TcCLB.503899.30  | 40S ribosomal protein S16, putative                              | 0,5785 | 0,0002629  |
| TcCLB.506959.130 | 60S ribosomal protein L30, putative                              | 0,5784 | 2,192E-16  |
| TcCLB.506711.10  | cAMP response protein, putative (CARP4)                          | 0,5783 | 2,883E-10  |
| TcCLB.506543.30  | hypothetical protein, conserved                                  | 0,5782 | 0,01086    |
| TcCLB.506123.40  | nucleolar RNA helicase II, putative                              | 0,5779 | 2,962E-10  |
| TcCLB.508413.84  | kinetoplastid membrane protein KMP-11 (fragment)                 | 0,5778 | 0,00002198 |
| TcCLB.511277.550 | hypothetical protein, conserved                                  | 0,5778 | 0,0008022  |
| TcCLB.505297.10  | dispersed gene family protein 1 (DGF-1, pseudogene), putative    | 0,5778 | 0,0815     |
| TcCLB.504445.10  | dispersed gene family protein 1 (DGF-1), putative                | 0,5777 | 0,0252     |
| TcCLB.511283.100 | hypothetical protein, conserved                                  | 0,577  | 2,56E-08   |
| TcCLB.506593.50  | hypothetical protein, conserved                                  | 0,577  | 5,108E-08  |
| TcCLB.510187.420 | chaperonin HSP60, mitochondrial precursor (pseudogene)           | 0,577  | 0,00002432 |
| TcCLB.507275.50  | hypothetical protein, conserved                                  | 0,5769 | 1,39E-07   |
| TcCLB.503861.80  | dispersed gene family protein 1 (DGF-1), putative                | 0,5769 | 0,00002364 |
| TcCLB.509955.10  | ubiquitin carboxyl-terminal hydrolase, putative (fragment)       | 0,5769 | 0,001498   |
| TcCLB.506155.60  | aldehyde dehydrogenase, putative                                 | 0,5768 | 2,208E-08  |
| TcCLB.506943.23  | hypothetical protein, conserved                                  | 0,5767 | 0,00002487 |
| TcCLB.508815.70  | hypothetical protein, conserved                                  | 0,5764 | 8,498E-14  |
| TcCLB.511517.153 | SH3 domain protein, putative                                     | 0,5764 | 2,11E-08   |
| TcCLB.506147.140 | hypothetical protein, conserved                                  | 0,5763 | 9,982E-09  |
| TcCLB.507691.10  | hypothetical protein, conserved                                  | 0,5762 | 0,06503    |
| TcCLB.506743.180 | recombination initiation protein NBS1, putative                  | 0,5758 | 5,527E-10  |
| TcCLB.509799.60  | hypothetical protein, conserved                                  | 0,5755 | 1,028E-11  |
| TcCLB.506683.210 | retrotransposon hot spot protein (RHS, pseudogene), putative     | 0,5755 | 0,0002584  |
| TcCLB.510497.130 | retrotransposon hot spot protein (RHS, pseudogene), putative     | 0,5755 | 0,001119   |
| TcCLB.504177.20  | fatty acyl CoA synthetase 2, putative                            | 0,5754 | 6,713E-09  |
| TcCLB.508047.25  | elongation factor 1-gamma (EF-1-gamma, pseudogene), putative     | 0,5754 | 0,2225     |
| TcCLB.510525.130 | Present in the outer mitochondrial membrane proteome             | 0,5753 | 9,71E-09   |
| TcCLB.510241.130 | tyrosine phosphatase-like protein (pseudogene), putative         | 0,5752 | 3,635E-07  |
| TcCLB.507107.40  | 3,2-trans-enoyl-CoA isomerase, mitochondrial precursor, putative | 0,5751 | 1,225E-14  |
| TcCLB.508285.10  | retrotransposon hot spot (RHS) protein, putative                 | 0,575  | 0,0005241  |
| TcCLB.445777.10  | retrotransposon hot spot (RHS) protein, putative, (fragment)     | 0,5747 | 1,678E-07  |
| TcCLB.508159.40  | dispersed gene family protein 1 (DGF-1), putative                | 0,5747 | 0,02325    |
| TcCLB.509029.170 | palmitoyl acyltransferase 5, putative                            | 0,5746 | 1,345E-06  |
| TcCLB.507053.160 | hypothetical protein, conserved                                  | 0,5745 | 4,65E-14   |
| TcCLB.506605.120 | hypothetical protein, conserved                                  | 0,574  | 7,47E-09   |
| TcCLB.507913.30  | proliferative cell nuclear antigen (PCNA), putative              | 0,5737 | 4,339E-11  |
| TcCLB.506297.310 | hypothetical protein, conserved                                  | 0,5737 | 2,827E-08  |
| TcCLB.508909.30  | hypothetical protein, conserved                                  | 0,5737 | 2,903E-08  |
| TcCLB.507023.280 | hypothetical protein, conserved                                  | 0,5732 | 3,887E-06  |
| TcCLB.509339.4   | poly(A) export protein, putative                                 | 0,5727 | 0,00001977 |
| TcCLB.508607.30  | dispersed gene family protein 1 (DGF-1), putative                | 0,5727 | 0,008003   |
| TcCLB.510853.120 | hypothetical protein, conserved                                  | 0,5726 | 1,712E-11  |
| TcCLB.504103.6   | hypothetical protein, conserved                                  | 0,5726 | 0,0002048  |
| TcCLB.506209.60  | retrotransposon hot spot protein (RHS, pseudogene), putative     | 0,5723 | 2,738E-06  |

|                  |                                                                |        |            |
|------------------|----------------------------------------------------------------|--------|------------|
| TcCLB.510769.90  | 60S ribosomal protein L32, putative                            | 0,5722 | 2,395E-09  |
| TcCLB.511145.40  | peroxin 14, putative                                           | 0,5721 | 1,989E-08  |
| TcCLB.507895.164 | hypothetical protein, conserved                                | 0,5721 | 1,414E-06  |
| TcCLB.504131.190 | mitochondrial carrier protein, putative                        | 0,5718 | 1,051E-06  |
| TcCLB.508895.80  | intraflagellar transport protein 52, putative (IFT52)          | 0,5716 | 1,058E-10  |
| TcCLB.511751.90  | hypothetical protein                                           | 0,5715 | 0,00009149 |
| TcCLB.508431.10  | dispersed gene family protein 1 (DGF-1, pseudogene), putative  | 0,5715 | 0,001082   |
| TcCLB.511181.50  | metallo-peptidase, Clan ME, Family M16                         | 0,5714 | 2,857E-11  |
| TcCLB.506127.50  | hypothetical protein, conserved                                | 0,5714 | 0,0000016  |
| TcCLB.511821.10  | Cytoplasmic dynein 1 heavy chain (DYNC1H1), putative           | 0,571  | 1,66E-11   |
| TcCLB.506425.40  | hypothetical protein, conserved                                | 0,5707 | 3,919E-18  |
| TcCLB.510139.10  | mucin-associated surface protein (MASP, pseudogene), putative  | 0,5707 | 0,01126    |
| TcCLB.506389.50  | hypothetical protein, conserved                                | 0,5706 | 6,072E-09  |
| TcCLB.509767.90  | alanine racemase, putative                                     | 0,5704 | 1,84E-08   |
| TcCLB.511115.30  | hypothetical protein, conserved                                | 0,5704 | 1,375E-06  |
| TcCLB.506283.10  | retrotransposon hot spot protein (RHS, pseudogene), putative   | 0,5704 | 0,0001146  |
| TcCLB.511255.65  | surface protease GP63 (pseudogene), putative                   | 0,5703 | 0,1742     |
| TcCLB.508503.60  | protein kinase, putative                                       | 0,5701 | 1,323E-13  |
| TcCLB.509151.60  | hypothetical protein, conserved                                | 0,5699 | 4,83E-09   |
| TcCLB.508277.370 | mitochondrial DNA topoisomerase II, putative                   | 0,5698 | 2,789E-13  |
| TcCLB.504231.10  | hypothetical protein, conserved                                | 0,5694 | 6,631E-08  |
| TcCLB.504121.39  | 60S ribosomal protein L14, putative (fragment)                 | 0,569  | 6,272E-11  |
| TcCLB.509977.100 | hypothetical protein, conserved                                | 0,5689 | 2,304E-10  |
| TcCLB.506599.395 | elongation factor 1-gamma (EF-1-gamma, pseudogene), putative   | 0,5689 | 0,1515     |
| TcCLB.507723.130 | eukaryotic translation initiation factor 3 subunit 8, putative | 0,5688 | 6,615E-16  |
| TcCLB.510731.80  | hypothetical protein, conserved                                | 0,5687 | 4,798E-10  |
| TcCLB.508641.160 | glycogenin glucosyltransferase, putative                       | 0,5687 | 5,466E-06  |
| TcCLB.506845.10  | retrotransposon hot spot protein (RHS, pseudogene), putative   | 0,5687 | 0,003861   |
| TcCLB.505037.100 | dispersed gene family protein 1 (DGF-1), putative              | 0,5686 | 1,433E-06  |
| TcCLB.511769.10  | hypothetical protein                                           | 0,5681 | 0,001738   |
| TcCLB.506471.10  | hypothetical protein, conserved                                | 0,5679 | 8,79E-08   |
| TcCLB.509211.39  | hypothetical protein, conserved (fragment)                     | 0,5677 | 1,482E-06  |
| TcCLB.510127.70  | leucine-rich repeat protein 1 (LRRP1), putative                | 0,5677 | 0,001672   |
| TcCLB.509023.160 | hypothetical protein, conserved                                | 0,5675 | 6,157E-07  |
| TcCLB.503557.40  | Present in the outer mitochondrial membrane proteome           | 0,5675 | 0,0005138  |
| TcCLB.506629.20  | hypothetical protein, conserved                                | 0,5674 | 3,593E-06  |
| TcCLB.510865.10  | retrotransposon hot spot protein (RHS, pseudogene), putative   | 0,5674 | 0,0002264  |
| TcCLB.503643.3   | 60S ribosomal protein L4, putative (fragment)                  | 0,5673 | 5,933E-13  |
| TcCLB.508891.50  | hypothetical protein                                           | 0,5673 | 1,18E-07   |
| TcCLB.511479.30  | hypothetical protein, conserved                                | 0,5673 | 0,00002217 |
| TcCLB.507023.110 | small GTP-binding protein Rab28, putative                      | 0,5672 | 7,365E-06  |
| TcCLB.509395.30  | tRNA exportin, putative                                        | 0,567  | 6,091E-10  |
| TcCLB.511907.110 | fatty acid transporter protein-like, putative                  | 0,567  | 3,652E-09  |
| TcCLB.506459.260 | hypothetical protein, conserved                                | 0,567  | 2,233E-08  |
| TcCLB.504443.20  | hypothetical protein, conserved                                | 0,5669 | 0,00005773 |

|                  |                                                           |        |            |
|------------------|-----------------------------------------------------------|--------|------------|
| TcCLB.511725.170 | hypothetical protein, conserved                           | 0,5665 | 1,204E-08  |
| TcCLB.503905.40  | hypothetical protein, conserved                           | 0,5665 | 0,00003881 |
| TcCLB.503979.20  | hypothetical protein, conserved                           | 0,5664 | 0,00001145 |
| TcCLB.503653.70  | hypothetical protein, conserved                           | 0,5663 | 0,00009074 |
| TcCLB.509429.310 | hypothetical protein, conserved                           | 0,5661 | 3,491E-08  |
| TcCLB.509179.10  | choline/carnitine O-acyltransferase (pseudogene), putativ | 0,5661 | 0,004028   |
| TcCLB.503665.21  | elongation factor 1-gamma (EF-1-gamma, pseudogene),       | 0,566  | 0,0188     |
| TcCLB.504125.20  | hypothetical protein                                      | 0,5658 | 0,00001933 |
| TcCLB.510105.250 | membrane-bound acid phosphatase 2, putative               | 0,5657 | 0,00004884 |
| TcCLB.509029.110 | hypothetical protein, conserved                           | 0,5656 | 8,104E-07  |
| TcCLB.510741.170 | hypothetical protein                                      | 0,5655 | 1,07E-08   |
| TcCLB.511537.8   | ABC transporter of the mitochondrion, putative (fragment  | 0,5654 | 6,276E-07  |
| TcCLB.511389.130 | diphthine synthase, putative                              | 0,5653 | 0,00001132 |
| TcCLB.508241.70  | hypothetical protein, conserved                           | 0,5651 | 1,097E-07  |
| TcCLB.507047.110 | otubain cysteine peptidase, Clan CA, family C65, putative | 0,565  | 2,795E-08  |
| TcCLB.504069.90  | centromere/microtubule binding protein cbf5, putative     | 0,5649 | 1,391E-08  |
| TcCLB.510763.50  | hypothetical protein, conserved                           | 0,5649 | 0,0003154  |
| TcCLB.506661.140 | hypothetical protein, conserved                           | 0,5646 | 1,098E-09  |
| TcCLB.509725.50  | protein kinase, putative                                  | 0,5645 | 0,04902    |
| TcCLB.503715.30  | ras-related protein RAB1A, putative (Rab1A)               | 0,5643 | 1,032E-13  |
| TcCLB.511545.130 | hypothetical protein, conserved                           | 0,5638 | 3,853E-07  |
| TcCLB.507875.30  | hypothetical protein, conserved                           | 0,5637 | 0,00001624 |
| TcCLB.506835.10  | hypothetical protein, conserved                           | 0,5636 | 2,543E-11  |
| TcCLB.509875.204 | hypothetical protein, conserved                           | 0,5636 | 0,00001965 |
| TcCLB.509011.20  | RNA polymerase IIA largest subunit, putative              | 0,5635 | 2,168E-11  |
| TcCLB.503971.30  | hypothetical protein, conserved                           | 0,5634 | 0,000251   |
| TcCLB.509769.80  | hypothetical protein, conserved                           | 0,5633 | 3,787E-17  |
| TcCLB.511807.180 | hypothetical protein, conserved                           | 0,5633 | 7,167E-16  |
| TcCLB.507061.20  | ribosomal protein L2, putative                            | 0,5633 | 1,104E-08  |
| TcCLB.509171.47  | hypothetical protein, conserved                           | 0,5631 | 1,162E-06  |
| TcCLB.508879.110 | hypothetical protein, conserved                           | 0,5631 | 0,0000016  |
| TcCLB.506179.50  | hypothetical protein, conserved                           | 0,5631 | 7,586E-06  |
| TcCLB.508089.20  | UDP-glucuronosyl and UDP-glucosyl transferase, putative   | 0,5628 | 5,261E-06  |
| TcCLB.508831.10  | hypothetical protein, conserved                           | 0,5624 | 5,128E-08  |
| TcCLB.508873.590 | retrotransposon hot spot protein (RHS, pseudogene), puta  | 0,5623 | 0,007248   |
| TcCLB.508301.20  | metallo-peptidase, Clan ME, Family M16                    | 0,5622 | 1,409E-08  |
| TcCLB.509935.29  | proline racemase (fragment)                               | 0,562  | 0,00003356 |
| TcCLB.506459.240 | elongation factor 1-gamma (EF-1-gamma), putative          | 0,562  | 0,0001263  |
| TcCLB.510647.50  | hypothetical protein, conserved                           | 0,5617 | 0,006063   |
| TcCLB.507795.30  | intraflagellar transport protein 27 (IFT27)               | 0,5616 | 1,944E-06  |
| TcCLB.506941.170 | ADP-ribosylation factor-like protein, putative            | 0,5615 | 0,0002542  |
| TcCLB.507521.10  | hypothetical protein, conserved                           | 0,5614 | 8,235E-07  |
| TcCLB.506195.230 | hypothetical protein, conserved                           | 0,561  | 1,374E-06  |
| TcCLB.510943.180 | hypothetical protein, conserved                           | 0,5609 | 0,00005083 |
| TcCLB.438897.10  | hypothetical protein, conserved                           | 0,5608 | 8,715E-07  |

|                  |                                                          |        |            |
|------------------|----------------------------------------------------------|--------|------------|
| TcCLB.504057.90  | hypothetical protein, conserved                          | 0,5607 | 3,489E-10  |
| TcCLB.504151.60  | actin interacting protein-like protein, putative         | 0,56   | 4,27E-09   |
| TcCLB.511801.50  | hypothetical protein, conserved                          | 0,56   | 4,81E-07   |
| TcCLB.506537.280 | glycine dehydrogenase [decarboxylating] (pseudogene), p  | 0,5597 | 3,778E-07  |
| TcCLB.508331.20  | hypothetical protein, conserved                          | 0,5596 | 2,684E-13  |
| TcCLB.504077.50  | hypothetical protein, conserved                          | 0,5596 | 5,052E-07  |
| TcCLB.506727.130 | hypothetical protein, conserved                          | 0,5596 | 0,00007148 |
| TcCLB.506935.19  | hypothetical protein, conserved (fragment)               | 0,5595 | 0,006286   |
| TcCLB.510901.20  | hypothetical protein                                     | 0,5591 | 0,0005977  |
| TcCLB.509287.60  | hypothetical protein, conserved                          | 0,5586 | 1,811E-09  |
| TcCLB.510355.269 | cytochrome b5, putative                                  | 0,5586 | 0,004235   |
| TcCLB.511817.120 | hypothetical protein, conserved                          | 0,5578 | 9,63E-09   |
| TcCLB.510829.10  | hypothetical protein, conserved                          | 0,5577 | 1,357E-06  |
| TcCLB.504429.70  | retrotransposon hot spot protein (RHS, pseudogene), puta | 0,5576 | 6,702E-09  |
| TcCLB.508859.40  | leucine-rich repeat protein (LRRP), putative             | 0,5575 | 4,062E-06  |
| TcCLB.504131.160 | hypothetical protein                                     | 0,5575 | 0,00001637 |
| TcCLB.507703.10  | retrotransposon hot spot protein (RHS, pseudogene), puta | 0,5575 | 0,005327   |
| TcCLB.504105.250 | hypothetical protein                                     | 0,5574 | 0,0002105  |
| TcCLB.503843.30  | hypothetical protein, conserved                          | 0,5573 | 4,08E-08   |
| TcCLB.508445.99  | pumilio/PUF RNA binding protein 7, putative (PUF7)       | 0,5572 | 1,477E-06  |
| TcCLB.508173.140 | hypothetical protein                                     | 0,5571 | 0,00001374 |
| TcCLB.511577.170 | hypothetical protein, conserved (pseudogene)             | 0,5569 | 6,191E-06  |
| TcCLB.511317.60  | hypothetical protein, conserved                          | 0,5569 | 0,002193   |
| TcCLB.507133.10  | trans-sialidase, putative                                | 0,5569 | 0,004407   |
| TcCLB.509471.77  | histone H3, putative                                     | 0,5568 | 3,662E-09  |
| TcCLB.511227.20  | retrotransposon hot spot protein (RHS, pseudogene), puta | 0,5567 | 3,819E-10  |
| TcCLB.507297.10  | cruzipain precursor, putative                            | 0,5565 | 2,045E-13  |
| TcCLB.510679.30  | metal-ion transporter, putative                          | 0,5565 | 3,4E-09    |
| TcCLB.509259.160 | retrotransposon hot spot (RHS) protein, putative         | 0,5565 | 2,864E-06  |
| TcCLB.503745.10  | hypothetical protein, conserved                          | 0,5565 | 3,597E-06  |
| TcCLB.503925.10  | hypothetical protein, conserved                          | 0,5565 | 0,00004246 |
| TcCLB.509999.100 | hypothetical protein, conserved                          | 0,5565 | 0,00006406 |
| TcCLB.511473.3   | hypothetical protein, conserved (pseudogene)             | 0,5564 | 0,001401   |
| TcCLB.506201.120 | hypothetical protein, conserved                          | 0,5563 | 1,423E-07  |
| TcCLB.511807.284 | carnitine O-palmitoyltransferase II, putative            | 0,5562 | 1,123E-07  |
| TcCLB.507019.80  | hypothetical protein, conserved                          | 0,5561 | 6,565E-13  |
| TcCLB.508271.30  | hypothetical protein, conserved                          | 0,556  | 6,927E-07  |
| TcCLB.507975.70  | retrotransposon hot spot protein (RHS, pseudogene), puta | 0,5559 | 5,361E-09  |
| TcCLB.511471.150 | hypothetical protein, conserved (pseudogene)             | 0,5559 | 0,01076    |
| TcCLB.510631.11  | retrotransposon hot spot protein (RHS, pseudogene), puta | 0,5558 | 1,837E-07  |
| TcCLB.510167.4   | hypothetical protein, conserved                          | 0,5557 | 0,003073   |
| TcCLB.507789.9   | dispersed gene family protein 1 (DGF-1), putative (fragm | 0,5555 | 0,02937    |
| TcCLB.503959.10  | hypothetical protein, conserved                          | 0,5553 | 5,805E-09  |
| TcCLB.509661.21  | ferric reductase (pseudogene), putative                  | 0,5553 | 0,0001165  |
| TcCLB.508821.20  | hypothetical protein, conserved                          | 0,555  | 1,987E-07  |



|                  |                                                            |        |            |
|------------------|------------------------------------------------------------|--------|------------|
| TcCLB.508601.30  | DNA-directed RNA polymerase I/III subunit, putative        | 0,5548 | 0,00004005 |
| TcCLB.510285.70  | kinetoplastid kinetochore protein 2, putative (kkt2)       | 0,554  | 6,161E-07  |
| TcCLB.508661.40  | hypothetical protein, conserved                            | 0,5537 | 0,00005393 |
| TcCLB.507129.40  | hypothetical protein, conserved                            | 0,5537 | 0,002117   |
| TcCLB.511589.90  | hypothetical protein, conserved                            | 0,5534 | 3,488E-07  |
| TcCLB.508873.360 | retrotransposon hot spot protein (RHS, pseudogene), puta   | 0,5533 | 0,02086    |
| TcCLB.509841.20  | hypothetical protein                                       | 0,5532 | 0,02689    |
| TcCLB.508871.180 | hypothetical protein                                       | 0,5532 | 0,07208    |
| TcCLB.506591.20  | U-box domain protein, putative                             | 0,5531 | 1,027E-09  |
| TcCLB.511289.14  | mitogen-activated protein kinase kinase kinase, putative ( | 0,553  | 1,262E-09  |
| TcCLB.508891.60  | serine/threonine protein phosphatase, putative             | 0,553  | 0,000286   |
| TcCLB.507831.60  | heat shock protein 110, putative                           | 0,5527 | 2,969E-12  |
| TcCLB.510943.20  | hypothetical protein                                       | 0,5527 | 0,00255    |
| TcCLB.504257.70  | valyl-tRNA synthetase, putative                            | 0,5526 | 4,403E-11  |
| TcCLB.509401.20  | cysteine peptidase (pseudogene), putative                  | 0,5525 | 9,627E-13  |
| TcCLB.508269.30  | translation initiation factor 2 subunit, putative          | 0,5524 | 0,00001469 |
| TcCLB.506517.40  | hypothetical protein                                       | 0,5524 | 0,02131    |
| TcCLB.509913.20  | hypothetical protein, conserved                            | 0,5523 | 9,533E-07  |
| TcCLB.509601.150 | hypothetical protein, conserved                            | 0,5523 | 3,497E-06  |
| TcCLB.508625.140 | hypothetical protein, conserved                            | 0,5522 | 0,0001884  |
| TcCLB.510659.80  | hypothetical protein, conserved                            | 0,5521 | 1,047E-06  |
| TcCLB.508711.30  | NADH dehydrogenase subunit N18M, putative                  | 0,5521 | 6,665E-06  |
| TcCLB.509023.20  | hypothetical protein, conserved                            | 0,5521 | 0,0009279  |
| TcCLB.509549.90  | alpha-adaptin-like (pseudogene), putative                  | 0,5518 | 1,776E-12  |
| TcCLB.508857.50  | hypothetical protein, conserved                            | 0,5517 | 9,719E-14  |
| TcCLB.507519.20  | hypothetical protein, conserved                            | 0,5517 | 1,705E-08  |
| TcCLB.463323.20  | retrotransposon hot spot protein (RHS, pseudogene), puta   | 0,5517 | 0,0008962  |
| TcCLB.506747.10  | orotidine-5-phosphate decarboxylase/orotate phosphoribc    | 0,5517 | 0,004281   |
| TcCLB.506691.14  | ATP-dependent DEAD/H RNA helicase, putative (fragment      | 0,5516 | 7,554E-07  |
| TcCLB.506605.229 | SNF2 DNA repair protein, putative                          | 0,5515 | 3,099E-08  |
| TcCLB.507603.200 | proteasome regulatory ATPase subunit 3, putative           | 0,5514 | 2,282E-09  |
| TcCLB.503421.50  | retrotransposon hot spot protein (RHS, pseudogene), puta   | 0,551  | 6,962E-09  |
| TcCLB.507519.210 | glycine dehydrogenase [decarboxylating] (pseudogene), p    | 0,551  | 0,00002699 |
| TcCLB.510241.5   | hypothetical protein                                       | 0,5509 | 1,395E-07  |
| TcCLB.508515.30  | RNA-binding protein 38, putative (RBP38)                   | 0,5508 | 1,315E-15  |
| TcCLB.507215.9   | dispersed gene family protein 1 (DGF-1), putative (fragme  | 0,5508 | 0,1776     |
| TcCLB.511577.120 | hypothetical protein, conserved                            | 0,5507 | 0,00001945 |
| TcCLB.507091.30  | succinate dehydrogenase subunit                            | 0,5506 | 0,005955   |
| TcCLB.422189.20  | leucine-rich repeat protein, putative                      | 0,5503 | 0,000299   |
| TcCLB.508175.146 | 60S ribosomal protein L23a, putative                       | 0,5501 | 8,023E-13  |
| TcCLB.506247.230 | prolyl endopeptidase (POP)                                 | 0,55   | 2,81E-09   |
| TcCLB.503499.30  | mitochondrial carrier protein (pseudogene), putative       | 0,55   | 0,0005577  |
| TcCLB.511163.40  | cell cycle sequence binding phosphoprotein (RBP45), puta   | 0,5499 | 1,142E-08  |
| TcCLB.503897.120 | hypothetical protein, conserved                            | 0,5498 | 1,82E-07   |
| TcCLB.506559.40  | cardiolipin synthetase, putative (cls)                     | 0,5495 | 5,636E-11  |

|                  |                                                           |        |            |
|------------------|-----------------------------------------------------------|--------|------------|
| TcCLB.509937.180 | tyrosyl-tRNA synthetase, putative                         | 0,5494 | 2,488E-08  |
| TcCLB.510101.400 | hypothetical protein, conserved                           | 0,5492 | 1,549E-10  |
| TcCLB.510861.60  | hypothetical protein, conserved                           | 0,5492 | 3,828E-10  |
| TcCLB.503499.24  | hypothetical protein                                      | 0,5488 | 0,02787    |
| TcCLB.506739.110 | hypothetical protein                                      | 0,5487 | 0,00002997 |
| TcCLB.509551.149 | phosphatidylserine decarboxylase, putative                | 0,5486 | 0,005444   |
| TcCLB.505171.10  | phospholipid transporting ATPase-like protein, putative   | 0,5484 | 1,157E-06  |
| TcCLB.503647.9   | hypothetical protein, conserved                           | 0,5483 | 1,975E-07  |
| TcCLB.508347.70  | Engulfment and cell motility domain-containing protein (F | 0,5482 | 1,857E-06  |
| TcCLB.504247.50  | hypothetical protein, conserved                           | 0,5481 | 0,00001214 |
| TcCLB.504179.100 | hypothetical protein, conserved                           | 0,5473 | 0,0001894  |
| TcCLB.509965.370 | adenosine kinase, putative                                | 0,5472 | 6,139E-10  |
| TcCLB.504161.59  | transporter, putative                                     | 0,547  | 0,0001614  |
| TcCLB.503999.30  | hypothetical protein, conserved                           | 0,5468 | 9,857E-12  |
| TcCLB.505935.30  | dispersed gene family protein 1 (DGF-1), putative         | 0,5466 | 0,126      |
| TcCLB.506173.200 | retrotransposon hot spot protein (RHS, pseudogene), puta  | 0,5465 | 0,0005413  |
| TcCLB.504213.40  | hypothetical protein, conserved                           | 0,5464 | 2,133E-07  |
| TcCLB.506885.420 | hypothetical protein                                      | 0,5464 | 0,0005274  |
| TcCLB.505807.250 | hypothetical protein, conserved                           | 0,5463 | 0,00002315 |
| TcCLB.508815.10  | hypothetical protein, conserved                           | 0,5462 | 0,00006738 |
| TcCLB.506445.60  | mitochondrial DNA topoisomerase II, putative              | 0,5461 | 1,01E-11   |
| TcCLB.509117.10  | ubiquitin-activating enzyme, putative                     | 0,5461 | 0,00002009 |
| TcCLB.510665.30  | hypothetical protein, conserved                           | 0,5459 | 0,00005269 |
| TcCLB.510311.110 | hypothetical protein, conserved                           | 0,5456 | 1,235E-06  |
| TcCLB.510029.40  | DNA-directed RNA polymerase III subunit C11, putative (R  | 0,5456 | 0,0002103  |
| TcCLB.511303.50  | hypothetical protein, conserved                           | 0,5454 | 0,0008894  |
| TcCLB.506507.10  | N-acetylglucosamine-6-phosphate deacetylase-like protei   | 0,5452 | 2,353E-08  |
| TcCLB.506975.20  | hypothetical protein, conserved                           | 0,5445 | 0,00009021 |
| TcCLB.503669.10  | hypothetical protein, conserved                           | 0,5443 | 3,095E-09  |
| TcCLB.509721.70  | hypothetical protein, conserved                           | 0,5443 | 0,0001071  |
| TcCLB.506529.470 | hypothetical protein, conserved                           | 0,5442 | 3,523E-12  |
| TcCLB.510799.9   | hypothetical protein, conserved                           | 0,5442 | 0,0001272  |
| TcCLB.506401.90  | centrin, putative                                         | 0,544  | 2,134E-06  |
| TcCLB.506529.524 | hypothetical protein, conserved                           | 0,5439 | 0,003796   |
| TcCLB.510629.210 | dispersed gene family protein 1 (DGF-1), putative         | 0,5439 | 0,1157     |
| TcCLB.506963.70  | hypothetical protein, conserved                           | 0,5436 | 0,00003613 |
| TcCLB.480561.10  | trans-sialidase, putative                                 | 0,5435 | 0,00115    |
| TcCLB.509109.114 | mitochondrial carrier protein, putative                   | 0,5434 | 0,00001214 |
| TcCLB.510187.250 | hypothetical protein, conserved                           | 0,5434 | 0,0002297  |
| TcCLB.508015.30  | hypothetical protein                                      | 0,5434 | 0,008602   |
| TcCLB.506631.10  | hypothetical protein, conserved                           | 0,5431 | 0,0001616  |
| TcCLB.510531.70  | hypothetical protein, conserved                           | 0,543  | 0,002149   |
| TcCLB.510357.90  | hypothetical protein, conserved                           | 0,5429 | 0,0004156  |
| TcCLB.507037.40  | hypothetical protein, conserved (pseudogene)              | 0,5428 | 7,392E-10  |
| TcCLB.506859.249 | hypothetical protein, conserved                           | 0,5426 | 0,0004929  |

|                  |                                                            |        |            |
|------------------|------------------------------------------------------------|--------|------------|
| TcCLB.506315.50  | 60S ribosomal protein L13a, putative                       | 0,5425 | 5,58E-12   |
| TcCLB.510359.30  | hypothetical protein, conserved                            | 0,5424 | 0,00007014 |
| TcCLB.509999.130 | hypothetical protein, conserved                            | 0,5423 | 1,903E-07  |
| TcCLB.509011.60  | hypothetical protein, conserved                            | 0,5423 | 3,548E-07  |
| TcCLB.503931.46  | hypothetical protein, conserved (pseudogene)               | 0,5421 | 0,02628    |
| TcCLB.506595.65  | hypothetical protein                                       | 0,542  | 0,001179   |
| TcCLB.507907.60  | retrotransposon hot spot (RHS) protein, putative           | 0,542  | 0,002744   |
| TcCLB.509429.320 | cysteine peptidase, putative                               | 0,5419 | 2,073E-14  |
| TcCLB.511283.140 | hypothetical protein, conserved                            | 0,5419 | 1,053E-10  |
| TcCLB.510609.20  | hypothetical protein, conserved                            | 0,5416 | 5,316E-08  |
| TcCLB.508425.20  | tryptophanyl-tRNA synthetase (pseudogene), putative        | 0,5415 | 0,0009084  |
| TcCLB.507519.164 | hypothetical protein, conserved                            | 0,5414 | 0,001123   |
| TcCLB.503995.40  | hypothetical protein, conserved                            | 0,5413 | 0,0006351  |
| TcCLB.509395.90  | hypothetical protein, conserved                            | 0,5412 | 0,0006855  |
| TcCLB.506953.30  | protein kinase, putative                                   | 0,541  | 0,0001282  |
| TcCLB.506529.595 | hypothetical protein                                       | 0,5408 | 0,00000177 |
| TcCLB.509765.30  | retrotransposon hot spot protein (RHS, pseudogene), puta   | 0,5408 | 0,0003182  |
| TcCLB.506513.130 | kinesin (pseudogene), putative                             | 0,5407 | 3,043E-10  |
| TcCLB.509561.70  | hypothetical protein, conserved                            | 0,5405 | 1,052E-08  |
| TcCLB.507591.15  | trans-sialidase (pseudogene), putative                     | 0,5404 | 0,0001425  |
| TcCLB.436535.19  | Glucose-6-phosphate dehydrogenase, putative                | 0,5402 | 0,04207    |
| TcCLB.503465.49  | mitochondrial processing peptidase, beta subunit, putativ  | 0,5401 | 0,00002366 |
| TcCLB.510747.90  | hypothetical protein                                       | 0,5399 | 0,00000105 |
| TcCLB.511649.120 | hypothetical protein, conserved                            | 0,5399 | 3,916E-06  |
| TcCLB.510121.180 | hypothetical protein, conserved                            | 0,5398 | 6,352E-06  |
| TcCLB.511585.20  | KREL1                                                      | 0,5397 | 5,207E-09  |
| TcCLB.509259.80  | hypothetical protein, conserved (pseudogene)               | 0,5396 | 0,00003569 |
| TcCLB.506337.4   | short-chain dehydrogenase, putative (fragment)             | 0,5395 | 0,0003209  |
| TcCLB.509181.9   | dispersed gene family protein 1 (DGF-1), putative          | 0,5393 | 0,1169     |
| TcCLB.511589.130 | 14-3-3 protein 1, putative (14-3-3-I)                      | 0,5392 | 2,904E-09  |
| TcCLB.509719.69  | hypothetical protein, conserved                            | 0,5392 | 0,0000192  |
| TcCLB.504253.10  | hypothetical protein, conserved                            | 0,5385 | 1,701E-08  |
| TcCLB.509215.10  | DNA polymerase delta catalytic subunit, putative           | 0,5383 | 3,349E-11  |
| TcCLB.504427.80  | hypothetical protein, conserved                            | 0,5383 | 0,00003954 |
| TcCLB.511727.220 | hypothetical protein, conserved                            | 0,5382 | 3,087E-06  |
| TcCLB.506439.9   | myosin heavy chain, putative                               | 0,5381 | 0,00005959 |
| TcCLB.511393.88  | hypothetical protein, conserved (fragment)                 | 0,5377 | 1,244E-07  |
| TcCLB.508409.60  | hypothetical protein, conserved                            | 0,5376 | 2,52E-07   |
| TcCLB.504033.160 | hypothetical protein                                       | 0,5376 | 0,00000405 |
| TcCLB.504055.100 | retrotransposon hot spot protein (RHS, pseudogene), puta   | 0,5374 | 0,0587     |
| TcCLB.507897.40  | acetyl-CoA carboxylase, putative                           | 0,5372 | 2,838E-07  |
| TcCLB.506617.90  | ATP-dependent Clp protease subunit, heat shock protein 1   | 0,5368 | 0,00002169 |
| TcCLB.506925.100 | hypothetical protein, conserved                            | 0,5367 | 0,00007925 |
| TcCLB.508065.50  | phosphatidylinositol-4-phosphate 5-kinase-like protein, pu | 0,5365 | 8,087E-09  |
| TcCLB.507997.50  | hypothetical protein, conserved                            | 0,5362 | 0,00002824 |

|                  |                                                          |        |            |
|------------------|----------------------------------------------------------|--------|------------|
| TcCLB.507679.20  | retrotransposon hot spot protein (RHS, pseudogene), puta | 0,5362 | 0,06588    |
| TcCLB.508207.120 | hypothetical protein, conserved                          | 0,5361 | 0,009435   |
| TcCLB.509039.20  | bystin, putative                                         | 0,5357 | 6,714E-10  |
| TcCLB.511799.9   | hypothetical protein, conserved (fragment)               | 0,5355 | 4,572E-08  |
| TcCLB.510303.200 | glucosamine-fructose-6-phosphate aminotransferase, put   | 0,5354 | 0,00002199 |
| TcCLB.505333.10  | N-acetyltransferase complex ARD1 subunit (pseudogene),   | 0,5353 | 0,04683    |
| TcCLB.510105.184 | hypothetical protein, conserved                          | 0,5352 | 0,0006476  |
| TcCLB.510515.139 | T-complex protein 1, gamma subunit, putative             | 0,5351 | 9,549E-06  |
| TcCLB.511819.50  | hypothetical protein, conserved                          | 0,535  | 1,726E-10  |
| TcCLB.508501.260 | hypothetical protein, conserved                          | 0,5348 | 6,021E-06  |
| TcCLB.511661.40  | signal peptidase type I, putative                        | 0,5348 | 0,001133   |
| TcCLB.505047.19  | trans-sialidase (pseudogene), putative                   | 0,5348 | 0,1679     |
| TcCLB.508999.40  | hypothetical protein, conserved                          | 0,5345 | 7,818E-06  |
| TcCLB.476125.9   | dispersed gene family protein 1 (DGF-1), putative        | 0,5344 | 0,02276    |
| TcCLB.508411.30  | hypothetical protein, conserved                          | 0,5343 | 1,563E-08  |
| TcCLB.511367.360 | elongation factor 1-alpha, putative                      | 0,5341 | 1,461E-16  |
| TcCLB.503405.10  | glutamine synthetase, putative                           | 0,5339 | 1,463E-09  |
| TcCLB.508547.40  | hypothetical protein, conserved                          | 0,5339 | 0,0002204  |
| TcCLB.507093.250 | RNA-binding protein, putative                            | 0,5336 | 3,329E-11  |
| TcCLB.506211.200 | metallo-peptidase, Clan MG, Family M24                   | 0,5336 | 3,882E-11  |
| TcCLB.510255.10  | hypothetical protein, conserved                          | 0,5336 | 0,00007607 |
| TcCLB.504149.40  | tatD related deoxyribonuclease, putative                 | 0,5334 | 4,071E-11  |
| TcCLB.511739.10  | hypothetical protein, conserved                          | 0,5334 | 2,572E-06  |
| TcCLB.509409.10  | protein kinase, putative                                 | 0,5334 | 0,0000208  |
| TcCLB.509391.30  | flagellar calcium-binding protein, putative              | 0,5334 | 0,2665     |
| TcCLB.511141.20  | choline dehydrogenase, putative                          | 0,5332 | 3,434E-12  |
| TcCLB.504055.60  | hypothetical protein, conserved                          | 0,5332 | 0,0003554  |
| TcCLB.503899.20  | 40S ribosomal protein S16, putative                      | 0,5331 | 5,166E-12  |
| TcCLB.503437.21  | N-acetyltransferase complex ARD1 subunit (pseudogene),   | 0,5331 | 0,1398     |
| TcCLB.510301.70  | hypothetical protein, conserved                          | 0,533  | 4,962E-08  |
| TcCLB.511817.30  | hypothetical protein, conserved                          | 0,5329 | 0,0003012  |
| TcCLB.506605.30  | hypothetical protein, conserved                          | 0,5326 | 0,00006009 |
| TcCLB.506147.220 | hypothetical protein, conserved                          | 0,5325 | 8,172E-08  |
| TcCLB.503575.27  | hypothetical protein, conserved                          | 0,5325 | 2,396E-07  |
| TcCLB.511365.80  | mitochondrial carrier protein, putative                  | 0,5325 | 9,603E-06  |
| TcCLB.506779.70  | hypothetical protein, conserved                          | 0,5323 | 0,00004566 |
| TcCLB.508351.20  | hypothetical protein, conserved                          | 0,5321 | 0,003672   |
| TcCLB.506573.30  | tyrosyl or methionyl-tRNA synthetase, putative           | 0,5319 | 0,0001093  |
| TcCLB.506147.30  | synaptojanin (N-terminal domain), putative               | 0,5315 | 1,421E-08  |
| TcCLB.507093.229 | U-rich RNA-binding protein UBP-2                         | 0,5315 | 2,596E-08  |
| TcCLB.508337.10  | hypothetical protein, conserved (fragment)               | 0,5315 | 7,999E-07  |
| TcCLB.507061.40  | hypothetical protein, conserved (pseudogene)             | 0,5314 | 2,924E-07  |
| TcCLB.511763.19  | hypothetical protein, conserved                          | 0,5313 | 0,00011    |
| TcCLB.506957.46  | hypothetical protein, conserved                          | 0,5312 | 0,0001443  |
| TcCLB.506537.260 | protein kinase, putative                                 | 0,5311 | 0,08092    |

|                  |                                                             |        |            |
|------------------|-------------------------------------------------------------|--------|------------|
| TcCLB.508221.64  | syntaxin binding protein (pseudogene), putative             | 0,5311 | 0,08786    |
| TcCLB.506127.170 | eukaryotic translation initiation factor eIF-4E, putative   | 0,5308 | 2,457E-08  |
| TcCLB.505123.10  | hypothetical protein, conserved                             | 0,5308 | 0,007387   |
| TcCLB.503431.109 | nucleoporin interacting component (NUP93), putative         | 0,5304 | 0,02568    |
| TcCLB.511419.40  | phosphoglycerate kinase, putative                           | 0,5303 | 7,1E-08    |
| TcCLB.508503.90  | hypothetical protein, conserved                             | 0,5303 | 0,00001218 |
| TcCLB.508153.330 | vacuolar protein sorting-associated protein 4, putative (VF | 0,5301 | 9,969E-12  |
| TcCLB.511731.80  | hypothetical protein, conserved                             | 0,5301 | 3,909E-06  |
| TcCLB.508501.190 | hypothetical protein, conserved                             | 0,5301 | 0,0004738  |
| TcCLB.510643.50  | retrotransposon hot spot protein (RHS, pseudogene), puta    | 0,5299 | 1,904E-06  |
| TcCLB.509281.30  | hypothetical protein                                        | 0,5299 | 0,0007822  |
| TcCLB.505071.40  | hypothetical protein                                        | 0,5296 | 0,000205   |
| TcCLB.511063.180 | trans-sialidase (pseudogene), putative                      | 0,5296 | 0,03645    |
| TcCLB.506201.170 | flagellar attachment zone protein, putative (FAZ1)          | 0,5294 | 2,673E-09  |
| TcCLB.510149.70  | hypothetical protein, conserved                             | 0,5293 | 1,638E-08  |
| TcCLB.508669.30  | hypothetical protein                                        | 0,5292 | 4,459E-06  |
| TcCLB.508895.30  | Sarcalumenin, putative                                      | 0,5291 | 1,618E-10  |
| TcCLB.507527.10  | hypothetical protein, conserved                             | 0,5291 | 1,709E-06  |
| TcCLB.509767.50  | hypothetical protein, conserved                             | 0,5287 | 7,51E-07   |
| TcCLB.506251.120 | hypothetical protein, conserved                             | 0,5283 | 0,001606   |
| TcCLB.425311.9   | hypothetical protein, conserved (fragment)                  | 0,5282 | 2,161E-06  |
| TcCLB.509023.120 | ubiquitin carboxyl-terminal hydrolase, putative             | 0,5281 | 2,18E-07   |
| TcCLB.506435.150 | hypothetical protein, conserved                             | 0,5281 | 2,378E-07  |
| TcCLB.506155.50  | vacuolar protein sorting-associated protein-like, putative  | 0,5279 | 0,00002367 |
| TcCLB.503971.20  | hypothetical protein, conserved                             | 0,5279 | 0,00005669 |
| TcCLB.509349.20  | retrotransposon hot spot (RHS) protein, putative            | 0,5273 | 3,381E-07  |
| TcCLB.508319.60  | hypothetical protein, conserved                             | 0,5272 | 6,34E-08   |
| TcCLB.508693.150 | hypothetical protein, conserved                             | 0,5272 | 0,00007226 |
| TcCLB.510785.15  | hypothetical protein, conserved                             | 0,527  | 0,01327    |
| TcCLB.511815.160 | hypothetical protein, conserved                             | 0,5268 | 2,191E-09  |
| TcCLB.508911.10  | hypothetical protein, conserved                             | 0,5267 | 4,013E-10  |
| TcCLB.504231.5   | hypothetical protein, conserved (pseudogene)                | 0,5261 | 0,01637    |
| TcCLB.509855.20  | Probable methyltransferase BTM2 homolog                     | 0,5258 | 5,214E-07  |
| TcCLB.508741.350 | hypothetical protein, conserved                             | 0,5258 | 5,24E-07   |
| TcCLB.508459.18  | phosphatidylserine decarboxylase, putative                  | 0,5258 | 0,04916    |
| TcCLB.511707.39  | hypothetical protein, conserved                             | 0,5257 | 9,895E-09  |
| TcCLB.508231.170 | hypothetical protein, conserved                             | 0,5256 | 5,796E-08  |
| TcCLB.508169.9   | elongation factor 2, putative (fragment)                    | 0,5255 | 1,407E-08  |
| TcCLB.510713.70  | retrotransposon hot spot protein (RHS, pseudogene), puta    | 0,5255 | 0,0002278  |
| TcCLB.509551.64  | small nuclear ribonucleoprotein Sm-F, putative              | 0,5255 | 0,009183   |
| TcCLB.508411.90  | tfiih basal transcription factor complex helicase xpb subur | 0,5254 | 4,857E-10  |
| TcCLB.508181.140 | inorganic pyrophosphatase, putative                         | 0,5253 | 0,00003951 |
| TcCLB.508781.60  | hypothetical protein, conserved                             | 0,5253 | 0,00005627 |
| TcCLB.511717.200 | hypothetical protein, conserved                             | 0,5252 | 0,00001325 |
| TcCLB.503823.120 | hypothetical protein, conserved                             | 0,5252 | 0,0002432  |

|                  |                                                                  |        |            |
|------------------|------------------------------------------------------------------|--------|------------|
| TcCLB.506529.590 | hypothetical protein, conserved                                  | 0,5251 | 0,00006754 |
| TcCLB.509921.60  | dispersed gene family protein 1 (DGF-1), putative                | 0,525  | 0,02135    |
| TcCLB.507773.30  | RNA editing complex protein MP46, putative                       | 0,5249 | 0,00006239 |
| TcCLB.511491.110 | rab6 GTPase activating protein, putative                         | 0,5249 | 0,0001205  |
| TcCLB.503749.20  | hypothetical protein                                             | 0,5248 | 3,154E-06  |
| TcCLB.509891.10  | hypothetical protein, conserved                                  | 0,5248 | 0,0003273  |
| TcCLB.508573.39  | dispersed gene family protein 1 (DGF-1), putative                | 0,5247 | 0,002434   |
| TcCLB.509753.290 | hypothetical protein, conserved (pseudogene)                     | 0,5246 | 0,05029    |
| TcCLB.508285.20  | hypothetical protein, conserved (pseudogene)                     | 0,5245 | 0,0006055  |
| TcCLB.506245.110 | dispersed gene family protein 1 (DGF-1, pseudogene), putative    | 0,5245 | 0,1321     |
| TcCLB.508461.370 | hypothetical protein, conserved                                  | 0,5244 | 3,339E-06  |
| TcCLB.511567.20  | retrotransposon hot spot protein (RHS, pseudogene), putative     | 0,5244 | 0,005309   |
| TcCLB.506051.30  | dispersed gene family protein 1 (DGF-1), putative                | 0,5242 | 0,0624     |
| TcCLB.509167.100 | valyl-tRNA synthetase, putative                                  | 0,5241 | 7,99E-14   |
| TcCLB.507803.40  | hypothetical protein                                             | 0,524  | 1,465E-08  |
| TcCLB.506147.130 | hypothetical protein, conserved                                  | 0,5238 | 0,0139     |
| TcCLB.509027.20  | ankyrin repeat protein, putative                                 | 0,5237 | 0,0002568  |
| TcCLB.509303.10  | retrotransposon hot spot protein (RHS, pseudogene), putative     | 0,5236 | 0,002192   |
| TcCLB.504431.64  | high mobility group protein, putative                            | 0,5235 | 2,082E-06  |
| TcCLB.506743.100 | hypothetical protein, conserved                                  | 0,5231 | 0,024      |
| TcCLB.509393.30  | hypothetical protein, conserved                                  | 0,523  | 4,436E-07  |
| TcCLB.503593.10  | eukaryotic translation initiation factor eIF-4E, putative        | 0,523  | 1,326E-06  |
| TcCLB.510101.380 | hypothetical protein, conserved                                  | 0,5229 | 7,939E-06  |
| TcCLB.447705.9   | hypothetical protein, conserved                                  | 0,5229 | 0,0232     |
| TcCLB.506999.140 | hypothetical protein, conserved                                  | 0,5227 | 1,29E-08   |
| TcCLB.507841.34  | exosome-associated protein 4, putative                           | 0,5227 | 0,0003426  |
| TcCLB.508831.100 | hypothetical protein, conserved                                  | 0,5226 | 0,00000342 |
| TcCLB.510901.10  | hypothetical protein, conserved                                  | 0,5225 | 0,00001301 |
| TcCLB.508347.159 | microtubule-associated protein, putative, (fragment) (GB)        | 0,5224 | 0,00004088 |
| TcCLB.504013.90  | hypothetical protein, conserved                                  | 0,5223 | 2,306E-09  |
| TcCLB.510533.130 | hypothetical protein, conserved                                  | 0,5223 | 1,939E-06  |
| TcCLB.507507.10  | hypothetical protein, conserved                                  | 0,5223 | 6,039E-06  |
| TcCLB.511817.50  | hypothetical protein, conserved                                  | 0,5223 | 0,00002013 |
| TcCLB.504081.344 | elongation factor 1-gamma (EF-1-gamma, pseudogene), putative     | 0,5223 | 0,2393     |
| TcCLB.420293.40  | beta galactofuranosyl glycosyltransferase (pseudogene), putative | 0,5222 | 0,002853   |
| TcCLB.511827.120 | retrotransposon hot spot protein (RHS, pseudogene), putative     | 0,5215 | 9,006E-09  |
| TcCLB.504119.10  | eukaryotic translation initiation factor 5, putative             | 0,5214 | 1,432E-09  |
| TcCLB.510435.10  | hypothetical protein, conserved                                  | 0,5214 | 0,0007177  |
| TcCLB.506367.20  | hypothetical protein, conserved                                  | 0,5213 | 1,647E-07  |
| TcCLB.511671.70  | glucosamine 6-phosphate n-acetyltransferase, putative            | 0,5212 | 0,000685   |
| TcCLB.511903.45  | tuzin-like (pseudogene), putative                                | 0,5211 | 0,00004511 |
| TcCLB.511277.600 | UDP-galactopyranose mutase (GLF)                                 | 0,521  | 1,406E-08  |
| TcCLB.510659.230 | hypothetical protein, conserved                                  | 0,521  | 0,0002053  |
| TcCLB.506795.90  | hypothetical protein, conserved                                  | 0,5209 | 4,671E-09  |
| TcCLB.510897.6   | Dynein light chain LC6, flagellar outer arm, putative            | 0,5208 | 0,00004695 |

|                  |                                                          |        |            |
|------------------|----------------------------------------------------------|--------|------------|
| TcCLB.511219.60  | retrotransposon hot spot protein (RHS, pseudogene), puta | 0,5208 | 0,0002086  |
| TcCLB.508969.30  | retrotransposon hot spot protein (RHS, pseudogene), puta | 0,5208 | 0,003751   |
| TcCLB.511889.40  | dispersed gene family protein 1 (DGF-1), putative        | 0,5207 | 0,001127   |
| TcCLB.503657.20  | hypothetical protein, conserved                          | 0,5205 | 0,000156   |
| TcCLB.507031.120 | metallo- peptidase, Clan MG, Family M24                  | 0,5203 | 9,592E-07  |
| TcCLB.508921.10  | hypothetical protein, conserved                          | 0,5203 | 0,0002684  |
| TcCLB.511051.70  | aminopeptidase, putative                                 | 0,5201 | 0,00000182 |
| TcCLB.505365.20  | retrotransposon hot spot protein (RHS, pseudogene), puta | 0,52   | 0,00003879 |
| TcCLB.508905.30  | hypothetical protein, conserved (pseudogene)             | 0,5199 | 0,00001478 |
| TcCLB.507485.90  | Wee1-like protein kinase, putative                       | 0,5198 | 2,066E-07  |
| TcCLB.507033.29  | extracellular receptor, putative (fragment)              | 0,5198 | 0,00001398 |
| TcCLB.508877.30  | retrotransposon hot spot protein (RHS, pseudogene), puta | 0,5197 | 0,02476    |
| TcCLB.479253.9   | hypothetical protein, conserved (fragment)               | 0,5196 | 0,001925   |
| TcCLB.508973.20  | hypothetical protein, conserved                          | 0,5195 | 1,007E-06  |
| TcCLB.511827.115 | hypothetical protein                                     | 0,5195 | 0,002336   |
| TcCLB.468005.9   | pumilio/PUF RNA binding protein 3, putative (PUF3)       | 0,5193 | 6,298E-08  |
| TcCLB.503613.20  | proteasome alpha 7 subunit, putative                     | 0,5192 | 6,973E-06  |
| TcCLB.509051.50  | hypothetical protein, conserved                          | 0,5191 | 4,429E-06  |
| TcCLB.509885.70  | transporter, putative                                    | 0,519  | 3,152E-07  |
| TcCLB.507063.110 | hypothetical protein, conserved                          | 0,5189 | 4,339E-10  |
| TcCLB.503653.9   | hypothetical protein, conserved                          | 0,5189 | 0,0126     |
| TcCLB.507769.40  | GTP-binding protein, putative                            | 0,5188 | 7,312E-07  |
| TcCLB.508331.80  | dispersed gene family protein 1 (DGF-1, pseudogene), put | 0,5188 | 0,01051    |
| TcCLB.506459.290 | elongation factor 1-gamma (EF-1-gamma, pseudogene),      | 0,5187 | 1,944E-08  |
| TcCLB.510665.10  | hypothetical protein, conserved                          | 0,5186 | 4,185E-07  |
| TcCLB.509157.60  | 1-acyl-sn-glycerol-3-phosphate acyltransferase, putative | 0,5186 | 3,445E-06  |
| TcCLB.507391.20  | hypothetical protein, conserved (pseudogene)             | 0,5185 | 6,565E-07  |
| TcCLB.505051.10  | hypothetical protein, conserved                          | 0,5184 | 1,72E-19   |
| TcCLB.507777.30  | retrotransposon hot spot protein (RHS, pseudogene), puta | 0,5184 | 2,477E-06  |
| TcCLB.509055.54  | hypothetical protein, conserved                          | 0,5184 | 0,004915   |
| TcCLB.510657.80  | hypothetical protein, conserved                          | 0,5183 | 4,196E-07  |
| TcCLB.510747.80  | Double RNA binding domain protein 9 (DRBD9)              | 0,5182 | 2,787E-06  |
| TcCLB.511589.50  | cyclophilin-like protein, putative                       | 0,5182 | 0,00002713 |
| TcCLB.506351.30  | hypothetical protein, conserved                          | 0,5181 | 0,00003244 |
| TcCLB.508241.30  | hypothetical protein, conserved                          | 0,518  | 2,276E-07  |
| TcCLB.506431.20  | retrotransposon hot spot protein (RHS, pseudogene), puta | 0,5179 | 0,00002344 |
| TcCLB.510271.20  | dispersed gene family protein 1 (DGF-1, pseudogene), put | 0,5177 | 0,01052    |
| TcCLB.507087.60  | hypothetical protein, conserved                          | 0,5176 | 0,00001281 |
| TcCLB.511747.30  | hypothetical protein, conserved                          | 0,5176 | 0,001348   |
| TcCLB.506239.40  | hypothetical protein, conserved                          | 0,5174 | 0,0006724  |
| TcCLB.503625.20  | hypothetical protein                                     | 0,5174 | 0,008299   |
| TcCLB.508153.620 | hypothetical protein, conserved                          | 0,5169 | 0,00004991 |
| TcCLB.430605.29  | 40S ribosomal protein S3, putative                       | 0,5168 | 1,247E-09  |
| TcCLB.511277.10  | DNA-directed RNA polymerase I subunit RPB5z, putative (  | 0,5167 | 0,0001166  |
| TcCLB.504175.9   | hypothetical protein, conserved                          | 0,5166 | 2,105E-08  |

|                  |                                                                  |        |            |
|------------------|------------------------------------------------------------------|--------|------------|
| TcCLB.507677.90  | hypothetical protein, conserved                                  | 0,5166 | 4,464E-06  |
| TcCLB.506401.50  | malonyl-CoA decarboxylase, mitochondrial precursor, putative     | 0,5165 | 5,239E-08  |
| TcCLB.508175.50  | hypothetical protein, conserved                                  | 0,5164 | 4,044E-08  |
| TcCLB.504109.10  | hypothetical protein, conserved                                  | 0,5164 | 6,068E-08  |
| TcCLB.504427.90  | ribosomal RNA methyltransferase, putative                        | 0,5164 | 0,00002247 |
| TcCLB.509967.30  | aspartyl-tRNA synthetase, putative                               | 0,5163 | 9,961E-06  |
| TcCLB.504065.50  | trans-sialidase (pseudogene), putative                           | 0,5162 | 2,133E-08  |
| TcCLB.509719.26  | hypothetical protein, conserved                                  | 0,5158 | 1,685E-07  |
| TcCLB.505939.20  | oligopeptidase B-like protein, putative                          | 0,5157 | 2,746E-10  |
| TcCLB.507093.140 | hypothetical protein, conserved                                  | 0,5154 | 5,134E-06  |
| TcCLB.507049.140 | hypothetical protein, conserved                                  | 0,5153 | 1,52E-08   |
| TcCLB.507081.60  | helicase-like protein, putative                                  | 0,5152 | 1,207E-09  |
| TcCLB.503563.10  | calcium-translocating P-type ATPase, putative                    | 0,5151 | 0,00003529 |
| TcCLB.509109.80  | hypothetical protein, conserved                                  | 0,515  | 2,884E-12  |
| TcCLB.467287.10  | alpha-tubulin N-acetyltransferase, putative                      | 0,5148 | 0,0001626  |
| TcCLB.506637.80  | hypothetical protein                                             | 0,5147 | 1,541E-06  |
| TcCLB.503917.21  | hypothetical protein, conserved                                  | 0,5146 | 0,00004506 |
| TcCLB.511337.39  | hypothetical protein, conserved                                  | 0,5143 | 0,0009407  |
| TcCLB.510283.110 | hypothetical protein, conserved                                  | 0,514  | 0,001212   |
| TcCLB.503619.25  | hypothetical protein, conserved                                  | 0,514  | 0,003821   |
| TcCLB.508465.30  | hypothetical protein, conserved                                  | 0,5139 | 4,293E-07  |
| TcCLB.503529.30  | hypothetical protein, conserved                                  | 0,5138 | 0,0003118  |
| TcCLB.509671.20  | hypothetical protein, conserved                                  | 0,5137 | 0,00001186 |
| TcCLB.509165.30  | AGP2beta-2, putative                                             | 0,5135 | 3,469E-08  |
| TcCLB.509581.5   | retrotransposon hot spot (RHS) protein, putative (fragment)      | 0,5135 | 0,006177   |
| TcCLB.508397.70  | transporter, putative                                            | 0,5133 | 0,000478   |
| TcCLB.511103.9   | dispersed gene family protein 1 (DGF-1), putative (fragment)     | 0,5132 | 0,2584     |
| TcCLB.503453.10  | hypothetical protein, conserved                                  | 0,5131 | 2,728E-06  |
| TcCLB.506127.20  | Nuclear RNA export factor (MEX67)                                | 0,513  | 9,285E-07  |
| TcCLB.507007.74  | small nuclear ribonucleoprotein Sm-F, putative                   | 0,5127 | 0,01969    |
| TcCLB.510761.10  | mismatch repair protein PMS1, putative                           | 0,5126 | 1,413E-09  |
| TcCLB.509099.140 | hypothetical protein, conserved                                  | 0,5126 | 0,000382   |
| TcCLB.509179.120 | hypothetical protein, conserved                                  | 0,5124 | 0,00326    |
| TcCLB.509733.190 | hypothetical protein, conserved                                  | 0,5123 | 0,0000102  |
| TcCLB.510857.10  | hypothetical protein, conserved                                  | 0,5122 | 3,411E-07  |
| TcCLB.511065.36  | hypothetical protein, conserved                                  | 0,5121 | 1,936E-08  |
| TcCLB.506467.14  | hypothetical protein, conserved                                  | 0,5121 | 0,0009187  |
| TcCLB.510943.80  | ABC transporter, putative                                        | 0,5118 | 1,805E-10  |
| TcCLB.509791.20  | hypothetical protein, conserved                                  | 0,5118 | 1,306E-06  |
| TcCLB.511907.100 | hypothetical protein, conserved                                  | 0,5116 | 0,0000024  |
| TcCLB.504801.10  | beta galactofuranosyl glycosyltransferase (pseudogene), putative | 0,5115 | 0,02145    |
| TcCLB.510889.261 | cruzipain precursor, putative                                    | 0,5112 | 0,0005866  |
| TcCLB.508555.60  | Calpain-like protein 1 (CAP5.5)                                  | 0,5109 | 1,351E-06  |
| TcCLB.508899.140 | hypothetical protein                                             | 0,5108 | 0,00008276 |
| TcCLB.510173.30  | hypothetical protein, conserved                                  | 0,5107 | 0,0009015  |



|                  |                                                          |        |            |
|------------------|----------------------------------------------------------|--------|------------|
| TcCLB.507001.14  | Present in the outer mitochondrial membrane proteome     | 0,5107 | 0,00175    |
| TcCLB.506311.30  | hypothetical protein, conserved                          | 0,5105 | 8,116E-06  |
| TcCLB.511889.11  | trans-sialidase (pseudogene), putative                   | 0,51   | 3,896E-06  |
| TcCLB.503855.50  | hypothetical protein, conserved                          | 0,5097 | 2,331E-10  |
| TcCLB.506673.30  | hypothetical protein, conserved                          | 0,5096 | 0,0004402  |
| TcCLB.507603.30  | PITH domain-containing protein                           | 0,5095 | 0,002321   |
| TcCLB.509959.10  | retrotransposon hot spot protein (RHS, pseudogene), puta | 0,5094 | 0,03302    |
| TcCLB.511859.170 | NADH-cytochrome b5 reductase, putative                   | 0,5091 | 4,435E-06  |
| TcCLB.507801.144 | hypothetical protein, conserved                          | 0,5089 | 0,001863   |
| TcCLB.509915.80  | hypothetical protein, conserved (pseudogene)             | 0,5089 | 0,005486   |
| TcCLB.510543.130 | ATP-dependent DEAD/H RNA helicase (pseudogene), puta     | 0,5089 | 0,1206     |
| TcCLB.503687.49  | hypothetical protein, conserved                          | 0,5088 | 0,00004599 |
| TcCLB.511473.10  | retrotransposon hot spot protein (RHS, pseudogene), puta | 0,5088 | 0,00007008 |
| TcCLB.508899.100 | hypothetical protein, conserved                          | 0,5088 | 0,0005922  |
| TcCLB.505939.89  | 5'-3' exoribonuclease A, putative (fragment) (XRNA)      | 0,5086 | 0,00002088 |
| TcCLB.508851.200 | hypothetical protein, conserved                          | 0,5086 | 0,0002629  |
| TcCLB.506885.360 | hypothetical protein, conserved                          | 0,5082 | 1,986E-06  |
| TcCLB.508413.5   | hypothetical protein, conserved                          | 0,508  | 0,01149    |
| TcCLB.508441.80  | Mitochondrial-processing peptidase subunit alpha (MPPA)  | 0,5079 | 3,796E-10  |
| TcCLB.511003.170 | hypothetical protein, conserved                          | 0,5075 | 0,0002857  |
| TcCLB.511771.60  | hypothetical protein                                     | 0,5075 | 0,2335     |
| TcCLB.506811.90  | hypothetical protein, conserved                          | 0,5073 | 4,45E-07   |
| TcCLB.506123.10  | major vault protein, putative                            | 0,5072 | 0,00001706 |
| TcCLB.506401.210 | hypothetical protein, conserved                          | 0,5072 | 0,00009232 |
| TcCLB.511665.21  | trans-sialidase (pseudogene), putative                   | 0,5071 | 0,0002627  |
| TcCLB.510889.120 | alanine aminotransferase, putative                       | 0,507  | 3,433E-09  |
| TcCLB.509033.40  | hypothetical protein, conserved                          | 0,507  | 4,374E-06  |
| TcCLB.430895.4   | hypothetical protein, conserved                          | 0,5068 | 0,2188     |
| TcCLB.509733.20  | hypothetical protein                                     | 0,5067 | 0,009279   |
| TcCLB.507837.50  | 40S ribosomal protein S11, putative                      | 0,5067 | 0,08013    |
| TcCLB.506737.40  | hypothetical protein, conserved                          | 0,5066 | 1,616E-07  |
| TcCLB.508461.520 | hypothetical protein, conserved                          | 0,5065 | 5,313E-12  |
| TcCLB.508211.70  | hypothetical protein, conserved                          | 0,5065 | 3,444E-06  |
| TcCLB.511761.10  | UDP-sugar pyrophosphorylase (Sloppy)                     | 0,5065 | 0,00001067 |
| TcCLB.507227.9   | hypothetical protein, conserved (fragment)               | 0,5064 | 7,956E-07  |
| TcCLB.508139.230 | retrotransposon hot spot protein (RHS, pseudogene), puta | 0,5062 | 8,102E-06  |
| TcCLB.509901.150 | hypothetical protein, conserved                          | 0,5062 | 0,002126   |
| TcCLB.508625.10  | elongation factor 2, putative                            | 0,506  | 8,449E-08  |
| TcCLB.510187.120 | hypothetical protein, conserved                          | 0,506  | 0,0001013  |
| TcCLB.510689.60  | Double RNA binding domain protein 7 (DRBD7)              | 0,5059 | 5,689E-06  |
| TcCLB.509693.20  | plectin, putative                                        | 0,5058 | 1,072E-08  |
| TcCLB.508695.10  | hypothetical protein, conserved                          | 0,5058 | 0,005551   |
| TcCLB.508805.20  | hypothetical protein, conserved                          | 0,5055 | 7,487E-09  |
| TcCLB.504343.30  | retrotransposon hot spot (RHS) protein, putative         | 0,5054 | 0,0007919  |
| TcCLB.507063.100 | mitochondrial DNA polymerase beta-PAK, putative          | 0,5053 | 9,327E-07  |

|                  |                                                          |        |            |
|------------------|----------------------------------------------------------|--------|------------|
| TcCLB.511621.100 | hypothetical protein, conserved                          | 0,5052 | 0,00001038 |
| TcCLB.511367.370 | elongation factor 1-alpha, putative                      | 0,505  | 5,899E-15  |
| TcCLB.504169.10  | dispersed gene family protein 1 (DGF-1), putative        | 0,5049 | 0,007297   |
| TcCLB.507485.140 | tuzin                                                    | 0,5048 | 8,402E-07  |
| TcCLB.510335.30  | hypothetical protein, conserved (pseudogene)             | 0,5047 | 2,689E-08  |
| TcCLB.508355.290 | hypothetical protein, conserved                          | 0,5047 | 0,0001065  |
| TcCLB.511751.170 | protein kinase, putative                                 | 0,5046 | 3,429E-10  |
| TcCLB.507087.20  | hypothetical protein                                     | 0,5046 | 0,00007196 |
| TcCLB.506295.120 | Trk system potassium uptake protein (HKT1)               | 0,5044 | 0,0001484  |
| TcCLB.510749.60  | hypothetical protein, conserved                          | 0,5037 | 0,0000379  |
| TcCLB.508413.20  | hypothetical protein, conserved                          | 0,5036 | 1,977E-06  |
| TcCLB.507033.20  | histone H3 variant, putative                             | 0,5036 | 0,00005388 |
| TcCLB.506391.50  | polyubiquitin (pseudogene), putative                     | 0,5035 | 0,00003698 |
| TcCLB.509715.70  | folylpolyglutamate synthase, putative (FPGS)             | 0,5035 | 0,0001332  |
| TcCLB.509623.19  | clathrin coat assembly protein ap19, putative (ClaATc)   | 0,5033 | 4,66E-17   |
| TcCLB.511019.84  | GDP-mannose 4,6 dehydratase, putative                    | 0,5033 | 0,00002775 |
| TcCLB.506831.70  | glutamyl-tRNA synthetase, putative                       | 0,5031 | 0,00000306 |
| TcCLB.508519.20  | retrotransposon hot spot protein (RHS, pseudogene), puta | 0,5031 | 0,0000211  |
| TcCLB.410589.10  | AMP deaminase, putative                                  | 0,5029 | 0,002096   |
| TcCLB.504163.40  | fructose-bisphosphate aldolase, glycosomal, putative     | 0,5028 | 0,00002929 |
| TcCLB.508397.40  | succinate dehydrogenase subunit                          | 0,5027 | 0,00006106 |
| TcCLB.503929.30  | hypothetical protein, conserved                          | 0,5026 | 1,832E-07  |
| TcCLB.506211.170 | Multiprotein-bridging factor 1, putative (mbf1)          | 0,5026 | 8,424E-07  |
| TcCLB.503457.4   | hypothetical protein, conserved                          | 0,5024 | 0,01761    |
| TcCLB.510359.170 | AAA ATPase, putative                                     | 0,5023 | 4,366E-11  |
| TcCLB.416503.10  | trans-sialidase (pseudogene), putative                   | 0,5022 | 0,00001179 |
| TcCLB.509601.160 | hypothetical protein, conserved                          | 0,5022 | 0,002229   |
| TcCLB.509353.60  | calmodulin, putative                                     | 0,5021 | 7,987E-09  |
| TcCLB.506355.100 | hexose transporter (pseudogene), putative                | 0,5019 | 0,0005053  |
| TcCLB.503957.120 | retrotransposon hot spot (RHS) protein, putative         | 0,5018 | 3,999E-06  |
| TcCLB.504131.20  | hypothetical protein, conserved                          | 0,5016 | 1,594E-09  |
| TcCLB.506699.40  | katanin-like protein, putative                           | 0,5016 | 0,0007567  |
| TcCLB.506561.14  | hypothetical protein, conserved                          | 0,5015 | 0,001474   |
| TcCLB.507011.60  | structural maintenance of chromosome (SMC) family prot   | 0,5014 | 8,916E-09  |
| TcCLB.504243.40  | hypothetical protein, conserved                          | 0,5012 | 5,905E-08  |
| TcCLB.503539.10  | hypothetical protein, conserved                          | 0,5012 | 0,003432   |
| TcCLB.508799.70  | pumilio-repeat, RNA-binding protein, putative            | 0,5011 | 1,545E-07  |
| TcCLB.511393.10  | nonspecific lipid-transfer protein, putative             | 0,5011 | 3,962E-06  |
| TcCLB.511277.290 | aconitase, putative                                      | 0,5011 | 0,00001369 |
| TcCLB.509661.10  | retrotransposon hot spot protein (RHS, pseudogene), puta | 0,5011 | 0,0003779  |
| TcCLB.503909.44  | hypothetical protein, conserved                          | 0,501  | 0,00008051 |
| TcCLB.504797.130 | hypothetical protein, conserved                          | 0,501  | 0,001184   |
| TcCLB.417203.9   | dispersed gene family protein 1 (DGF-1), putative        | 0,501  | 0,06147    |
| TcCLB.508325.310 | hypothetical protein, conserved                          | 0,5007 | 0,008425   |
| TcCLB.508183.10  | ubiquinone biosynthesis protein COQ7 homolog, putative   | 0,5005 | 0,0003133  |

|                  |                                                          |        |            |
|------------------|----------------------------------------------------------|--------|------------|
| TcCLB.506525.150 | hypothetical protein, conserved                          | 0,5004 | 1,185E-08  |
| TcCLB.510531.50  | hypothetical protein, conserved                          | 0,5002 | 1,698E-06  |
| TcCLB.506937.20  | hypothetical protein, conserved                          | 0,5002 | 0,01569    |
| TcCLB.508755.20  | dispersed gene family protein 1 (DGF-1, pseudogene), put | 0,5002 | 0,05031    |
| TcCLB.508173.110 | cysteine protease, putative                              | 0,5    | 0,00006437 |
| TcCLB.510003.41  | clathrin coat assembly protein ap19, putative            | 0,4999 | 8,939E-17  |
| TcCLB.508321.60  | hypothetical protein, conserved                          | 0,4996 | 5,15E-07   |
| TcCLB.509965.220 | hypothetical protein, conserved                          | 0,4995 | 1,723E-07  |
| TcCLB.506991.10  | hypothetical protein, conserved                          | 0,4994 | 0,00001058 |
| TcCLB.506831.30  | hypothetical protein, conserved                          | 0,4993 | 0,0003021  |
| TcCLB.511925.30  | fucose kinase (pseudogene), putative                     | 0,4992 | 5,477E-07  |
| TcCLB.509767.100 | hypothetical protein, conserved                          | 0,4992 | 0,0005876  |
| TcCLB.509745.20  | glycosyl transferase-like, putative                      | 0,499  | 0,00001979 |
| TcCLB.506753.110 | cytochrome b5-like protein, putative                     | 0,4989 | 0,00007169 |
| TcCLB.503909.68  | hypothetical protein, conserved                          | 0,4989 | 0,0003193  |
| TcCLB.509317.80  | succinate dehydrogenase subunit                          | 0,4988 | 7,181E-06  |
| TcCLB.506247.50  | CCT-theta, putative                                      | 0,4987 | 1,962E-16  |
| TcCLB.503583.60  | hypothetical protein                                     | 0,4987 | 2,732E-07  |
| TcCLB.508781.120 | hypothetical protein, conserved                          | 0,4984 | 0,0002857  |
| TcCLB.503893.100 | hypothetical protein, conserved                          | 0,498  | 0,0135     |
| TcCLB.509805.260 | dispersed gene family protein 1 (DGF-1, pseudogene), put | 0,4979 | 0,001307   |
| TcCLB.511507.50  | mannosyltransferase, putative                            | 0,4978 | 0,00002658 |
| TcCLB.506905.30  | hypothetical protein, conserved                          | 0,4978 | 0,00006384 |
| TcCLB.508015.50  | hypothetical protein, conserved                          | 0,4975 | 0,00006469 |
| TcCLB.510877.10  | antigenic protein, putative                              | 0,4975 | 0,0002625  |
| TcCLB.508389.154 | mucin-associated surface protein (MASP), putative        | 0,4974 | 0,06885    |
| TcCLB.509569.140 | hypothetical protein, conserved                          | 0,4971 | 3,743E-06  |
| TcCLB.506697.80  | Present in the outer mitochondrial membrane proteome 2   | 0,4969 | 0,0002224  |
| TcCLB.506235.10  | translation initiation factor IF-2, putative             | 0,4967 | 7,475E-11  |
| TcCLB.426799.19  | serine/threonine protein kinase, putative                | 0,4967 | 0,005218   |
| TcCLB.511167.90  | 14-3-3 protein 2, putative (14-3-3-II)                   | 0,4964 | 2,659E-07  |
| TcCLB.508741.100 | hypothetical protein, conserved                          | 0,4962 | 6,353E-06  |
| TcCLB.506183.20  | dispersed gene family protein 1 (DGF-1), putative        | 0,496  | 0,009356   |
| TcCLB.510283.140 | UDP-N-acetylglucosamine-dolichyl-phosphate N-acetylglu   | 0,4959 | 1,799E-06  |
| TcCLB.511627.70  | hypothetical protein, conserved                          | 0,4959 | 0,0004486  |
| TcCLB.509207.80  | glycogen synthase kinase-3 alpha, putative               | 0,4958 | 0,0000311  |
| TcCLB.510849.30  | hypothetical protein, conserved (pseudogene)             | 0,4957 | 0,0002085  |
| TcCLB.507031.64  | hypothetical protein, conserved                          | 0,4957 | 0,0003417  |
| TcCLB.508579.4   | hypothetical protein, conserved                          | 0,4957 | 0,00371    |
| TcCLB.509153.130 | hypothetical protein                                     | 0,4955 | 4,568E-07  |
| TcCLB.508469.59  | helicase, putative                                       | 0,4954 | 0,00001114 |
| TcCLB.508737.150 | mitochondrial carrier protein, putative                  | 0,4953 | 8,765E-09  |
| TcCLB.510889.140 | alanine aminotransferase, putative                       | 0,4953 | 5,459E-07  |
| TcCLB.508891.130 | hypothetical protein, conserved                          | 0,4952 | 8,956E-08  |
| TcCLB.479847.20  | retrotransposon hot spot (RHS) protein, putative         | 0,4952 | 0,05132    |

|                  |                                                          |        |            |
|------------------|----------------------------------------------------------|--------|------------|
| TcCLB.510149.140 | Triple RNA binding domain protein 3 (TRRM3)              | 0,4951 | 4,328E-07  |
| TcCLB.511837.129 | RNA-binding protein, putative                            | 0,4951 | 0,00001878 |
| TcCLB.511819.59  | dynein heavy chain, cytosolic, putative                  | 0,4951 | 0,00002302 |
| TcCLB.506257.10  | DNA/RNA non-specific endonuclease protein-like, putative | 0,495  | 0,001067   |
| TcCLB.508577.50  | hypothetical protein                                     | 0,4948 | 0,004043   |
| TcCLB.503973.271 | surface protease GP63 (pseudogene), putative             | 0,4947 | 0,04585    |
| TcCLB.511303.100 | hypothetical protein                                     | 0,4946 | 0,0001007  |
| TcCLB.509809.39  | P-type H -ATPase, putative                               | 0,4945 | 1,74E-10   |
| TcCLB.509331.90  | AMPK subunit beta, putative (AMPKB)                      | 0,4945 | 3,108E-06  |
| TcCLB.510515.130 | S-adenosyl-methyltransferase mraW-like protein, putative | 0,4945 | 4,498E-06  |
| TcCLB.508231.64  | hypothetical protein, conserved                          | 0,4945 | 0,0006399  |
| TcCLB.508971.30  | lysyl-tRNA synthetase, putative                          | 0,4944 | 3,831E-12  |
| TcCLB.506297.150 | 40S ribosomal protein S5, putative                       | 0,4944 | 4,859E-09  |
| TcCLB.510543.80  | hypothetical protein                                     | 0,4943 | 0,04102    |
| TcCLB.509825.40  | hypothetical protein, conserved                          | 0,494  | 1,415E-07  |
| TcCLB.506795.40  | phosphatidylserine synthase, putative                    | 0,494  | 0,00003577 |
| TcCLB.509537.60  | meiosis recombination protein SPO11, putative            | 0,4939 | 2,239E-06  |
| TcCLB.503973.260 | syntaxin binding protein (pseudogene), putative          | 0,4939 | 0,1465     |
| TcCLB.511025.50  | glucosamine-6-phosphate isomerase, putative              | 0,4938 | 1,463E-09  |
| TcCLB.506559.320 | hypothetical protein, conserved                          | 0,4937 | 0,0004178  |
| TcCLB.511317.30  | regulator of nonsense transcripts UPF1, putative         | 0,4936 | 7,917E-11  |
| TcCLB.509023.50  | kinesin, putative                                        | 0,4935 | 2,897E-07  |
| TcCLB.509905.20  | retrotransposon hot spot protein (RHS, pseudogene), puta | 0,4935 | 0,005554   |
| TcCLB.510997.20  | hypothetical protein, conserved                          | 0,4934 | 0,0001856  |
| TcCLB.508241.80  | hypothetical protein, conserved                          | 0,4933 | 0,00008693 |
| TcCLB.503509.10  | hypothetical protein, conserved                          | 0,4932 | 1,396E-11  |
| TcCLB.509245.20  | hypothetical protein, conserved                          | 0,493  | 0,01523    |
| TcCLB.509055.50  | hypothetical protein, conserved                          | 0,4927 | 0,00008245 |
| TcCLB.507053.180 | hypothetical protein, conserved                          | 0,4926 | 2,509E-13  |
| TcCLB.506595.140 | hypothetical protein                                     | 0,4926 | 0,001593   |
| TcCLB.511179.60  | hypothetical protein, conserved                          | 0,4922 | 0,1498     |
| TcCLB.506387.9   | chaperone DNAJ protein, putative                         | 0,492  | 0,01039    |
| TcCLB.509179.180 | zinc-finger protein ZPR1, putative                       | 0,4918 | 5,516E-06  |
| TcCLB.509157.270 | hypothetical protein, conserved                          | 0,4918 | 0,0002524  |
| TcCLB.510533.20  | hypothetical protein, conserved                          | 0,4918 | 0,0004782  |
| TcCLB.491081.10  | retrotransposon hot spot protein (RHS, pseudogene), puta | 0,4916 | 0,005433   |
| TcCLB.510057.10  | hypothetical protein, conserved                          | 0,4913 | 0,03606    |
| TcCLB.510851.50  | hypothetical protein, conserved (pseudogene)             | 0,4911 | 9,464E-06  |
| TcCLB.506733.120 | hypothetical protein, conserved                          | 0,4911 | 0,00003992 |
| TcCLB.509999.20  | hypothetical protein, conserved                          | 0,4909 | 0,0001367  |
| TcCLB.503957.90  | dispersed gene family protein 1 (DGF-1, pseudogene), put | 0,4909 | 0,01872    |
| TcCLB.510165.54  | hypothetical protein, conserved                          | 0,4908 | 0,0002423  |
| TcCLB.508375.30  | aspartate carbamoyltransferase, putative                 | 0,4907 | 5,962E-06  |
| TcCLB.510317.40  | hypothetical protein, conserved                          | 0,4906 | 0,00001274 |
| TcCLB.511751.160 | hypothetical protein, conserved                          | 0,4905 | 0,002374   |

|                  |                                                         |        |            |
|------------------|---------------------------------------------------------|--------|------------|
| TcCLB.503829.40  | hypothetical protein, conserved                         | 0,4904 | 1,143E-07  |
| TcCLB.511907.230 | hypothetical protein, conserved                         | 0,4904 | 8,174E-06  |
| TcCLB.510225.30  | hypothetical protein, conserved                         | 0,4904 | 0,00001248 |
| TcCLB.504021.70  | hypothetical protein, conserved                         | 0,4904 | 0,00005388 |
| TcCLB.507765.60  | 40S ribosomal protein S21, putative                     | 0,4902 | 2,397E-11  |
| TcCLB.509023.110 | ATP-dependent protease ATPase subunit HslU2 (HslU2)     | 0,49   | 3,139E-08  |
| TcCLB.510859.24  | hypothetical protein, conserved                         | 0,4898 | 1,592E-07  |
| TcCLB.510903.60  | prenyltransferase, putative                             | 0,4896 | 0,0001282  |
| TcCLB.506401.180 | hypothetical protein, conserved                         | 0,4893 | 3,141E-09  |
| TcCLB.509793.10  | kinetoplast-associated protein 4 (KAP4)                 | 0,4892 | 0,0005852  |
| TcCLB.510289.99  | hypothetical protein, conserved                         | 0,489  | 0,00126    |
| TcCLB.509149.30  | hypothetical protein, conserved                         | 0,4889 | 1,368E-08  |
| TcCLB.511259.161 | elongation factor 1-gamma (EF-1-gamma, pseudogene),     | 0,4889 | 0,1799     |
| TcCLB.511727.250 | hypothetical protein, conserved                         | 0,4888 | 4,98E-09   |
| TcCLB.508589.30  | retrotransposon hot spot (RHS) protein, putative        | 0,4887 | 1,203E-06  |
| TcCLB.505267.30  | beta galactofuranosyl glycosyltransferase, putative     | 0,4887 | 0,03834    |
| TcCLB.510357.130 | hypothetical protein, conserved                         | 0,4885 | 0,002565   |
| TcCLB.509599.80  | hypothetical protein, conserved                         | 0,4884 | 0,00002631 |
| TcCLB.511471.10  | hypothetical protein, conserved (pseudogene)            | 0,4884 | 0,009855   |
| TcCLB.509979.119 | hypothetical protein, conserved                         | 0,4881 | 0,001308   |
| TcCLB.408437.29  | hypothetical protein (fragment)                         | 0,488  | 0,00000378 |
| TcCLB.509995.20  | hypothetical protein, conserved                         | 0,4878 | 0,00000199 |
| TcCLB.508551.30  | hexose transporter, putative                            | 0,4878 | 0,001031   |
| TcCLB.503881.50  | hypothetical protein, conserved                         | 0,4878 | 0,02292    |
| TcCLB.509611.160 | proteasome regulatory non-ATPase subunit, putative      | 0,4874 | 3,568E-06  |
| TcCLB.511439.50  | zinc transporter, putative                              | 0,4874 | 5,048E-06  |
| TcCLB.506321.350 | hypothetical protein, conserved                         | 0,4874 | 0,0002581  |
| TcCLB.507221.30  | hypothetical protein, conserved                         | 0,4874 | 0,003165   |
| TcCLB.511029.20  | kinetoplast-associated protein 3 (KAP3)                 | 0,4873 | 0,0001882  |
| TcCLB.509057.10  | hypothetical protein, conserved                         | 0,4871 | 0,009185   |
| TcCLB.507787.140 | hypothetical protein, conserved                         | 0,487  | 0,00006973 |
| TcCLB.506919.110 | glycine dehydrogenase [decarboxylating] (pseudogene), p | 0,4869 | 0,1586     |
| TcCLB.507711.30  | hypothetical protein, conserved                         | 0,4867 | 0,0007795  |
| TcCLB.506321.320 | suppressive immunomodulating factor, putative (TSIF)    | 0,4866 | 1,449E-06  |
| TcCLB.511121.20  | hypothetical protein                                    | 0,4866 | 0,07237    |
| TcCLB.511423.140 | hypothetical protein, conserved                         | 0,4865 | 5,823E-07  |
| TcCLB.509491.20  | hypothetical protein, conserved (pseudogene)            | 0,4864 | 0,00001829 |
| TcCLB.507485.80  | hypothetical protein, conserved                         | 0,4864 | 0,003147   |
| TcCLB.510741.20  | hypothetical protein, conserved                         | 0,4862 | 0,0001238  |
| TcCLB.511381.60  | hypothetical protein, conserved                         | 0,4862 | 0,0004723  |
| TcCLB.510697.70  | elongation factor 1-gamma (EF-1-gamma, pseudogene),     | 0,4861 | 0,0003458  |
| TcCLB.508831.60  | Low-affinity phosphate transporter, putative (PHO91)    | 0,4858 | 1,197E-09  |
| TcCLB.508547.20  | pre-rRNA-processing protein tsr1 homolog                | 0,4858 | 1,834E-06  |
| TcCLB.508307.80  | mitochondrial RNA binding complex 1 subunit, putative   | 0,4857 | 2,277E-06  |
| TcCLB.508771.55  | hypothetical protein, conserved (pseudogene)            | 0,4855 | 0,001057   |

|                  |                                                               |        |            |
|------------------|---------------------------------------------------------------|--------|------------|
| TcCLB.506247.360 | hypothetical protein, conserved                               | 0,4852 | 0,0001794  |
| TcCLB.511469.60  | Trk system potassium uptake protein (HKT1)                    | 0,4851 | 0,00004059 |
| TcCLB.508769.10  | hypothetical protein, conserved (pseudogene)                  | 0,4849 | 9,763E-06  |
| TcCLB.506457.110 | hypothetical protein, conserved                               | 0,4849 | 0,00002867 |
| TcCLB.507559.70  | hypothetical protein, conserved                               | 0,4849 | 0,00004589 |
| TcCLB.503843.40  | chaperone DNAJ protein, putative (fragment)                   | 0,4846 | 3,642E-06  |
| TcCLB.506529.230 | hypothetical protein, conserved                               | 0,4846 | 0,0006886  |
| TcCLB.508629.42  | retrotransposon hot spot protein (RHS, pseudogene), puta      | 0,4845 | 1,617E-06  |
| TcCLB.506845.31  | ATP-dependent DEAD/H RNA helicase (pseudogene), puta          | 0,4844 | 0,1911     |
| TcCLB.511827.20  | hypothetical protein, conserved                               | 0,4843 | 1,682E-07  |
| TcCLB.503525.40  | FAD dependent oxidoreductase, putative (POMP20)               | 0,4842 | 1,901E-07  |
| TcCLB.507491.162 | flagellar calcium-binding protein, putative (fragment)        | 0,4842 | 0,00004524 |
| TcCLB.511181.140 | hypothetical protein                                          | 0,4841 | 9,025E-07  |
| TcCLB.506679.40  | mitogen-activated protein kinase kinase 5, putative (MKK)     | 0,484  | 0,00000317 |
| TcCLB.511483.30  | hypothetical protein, conserved                               | 0,4839 | 0,00008835 |
| TcCLB.506843.70  | protein kinase, putative                                      | 0,4839 | 0,2621     |
| TcCLB.506989.100 | Triple RNA binding domain protein 3                           | 0,4838 | 0,00001575 |
| TcCLB.511681.10  | hypothetical protein                                          | 0,4838 | 0,128      |
| TcCLB.510519.30  | mitochondrial structure specific endonuclease I (SSE-1), p    | 0,4837 | 0,00001983 |
| TcCLB.511527.34  | 60S ribosomal protein L8, putative                            | 0,4835 | 1,556E-11  |
| TcCLB.503955.70  | eukaryotic translation initiation factor 2 beta subunit, puta | 0,4834 | 0,00005047 |
| TcCLB.510655.20  | hypothetical protein, conserved                               | 0,4831 | 0,00004582 |
| TcCLB.503591.10  | retrotransposon hot spot protein (RHS, pseudogene), puta      | 0,4831 | 0,005226   |
| TcCLB.511751.166 | hypothetical protein, conserved                               | 0,483  | 0,00002974 |
| TcCLB.507011.230 | hypothetical protein, conserved (pseudogene)                  | 0,4829 | 2,376E-06  |
| TcCLB.510819.60  | ATP-dependent protease ATPase subunit HslU1, putative (       | 0,4827 | 5,9E-09    |
| TcCLB.506925.440 | Nuclear pore complex protein 158 (pseudogene)                 | 0,4826 | 7,245E-11  |
| TcCLB.509459.70  | hypothetical protein, conserved                               | 0,4825 | 0,00000459 |
| TcCLB.508535.20  | nuclear transmembrane protein, putative (NP)                  | 0,4825 | 0,00001793 |
| TcCLB.504797.30  | pseudouridylate synthase-like protein, putative               | 0,4824 | 0,00001529 |
| TcCLB.409117.10  | hypothetical protein, conserved                               | 0,4824 | 0,002534   |
| TcCLB.510861.94  | hypothetical protein, conserved                               | 0,4821 | 1,369E-09  |
| TcCLB.510603.20  | hypothetical protein, conserved                               | 0,4819 | 0,001878   |
| TcCLB.508823.50  | 40S ribosomal protein S14, putative                           | 0,4817 | 4,072E-11  |
| TcCLB.510753.9   | helicase, putative                                            | 0,4817 | 5,888E-08  |
| TcCLB.506885.430 | lipoic acid containing carrier protein, putative (GCVH)       | 0,4817 | 0,007589   |
| TcCLB.506871.40  | hypothetical protein, conserved                               | 0,4816 | 0,00001801 |
| TcCLB.509933.20  | hypothetical protein, conserved                               | 0,4813 | 0,00001183 |
| TcCLB.508479.360 | hypothetical protein, conserved                               | 0,4812 | 0,00001579 |
| TcCLB.507603.10  | hypothetical protein, conserved (pseudogene)                  | 0,4812 | 0,0009571  |
| TcCLB.509259.140 | glycine dehydrogenase [decarboxylating] (pseudogene), p       | 0,4808 | 0,00008482 |
| TcCLB.508779.70  | hypothetical protein, conserved                               | 0,4806 | 8,13E-07   |
| TcCLB.509917.12  | N-acetyltransferase complex ARD1 subunit (pseudogene), p      | 0,4804 | 0,135      |
| TcCLB.510129.11  | surface glycoprotein, putative                                | 0,4803 | 0,00004843 |
| TcCLB.507903.19  | dispersed gene family protein 1 (DGF-1, pseudogene), put      | 0,4803 | 0,04241    |

|                  |                                                          |        |            |
|------------------|----------------------------------------------------------|--------|------------|
| TcCLB.505773.20  | dispersed gene family protein 1 (DGF-1), putative        | 0,4802 | 0,1047     |
| TcCLB.511463.20  | AMPK subunit gamma (AMPKG)                               | 0,48   | 0,0002283  |
| TcCLB.505699.20  | retrotransposon hot spot protein (RHS, pseudogene), puta | 0,48   | 0,004038   |
| TcCLB.416761.10  | surface protease GP63, putative                          | 0,4798 | 0,136      |
| TcCLB.505807.140 | hypothetical protein, conserved                          | 0,4797 | 0,00000165 |
| TcCLB.445011.19  | hypothetical protein, conserved                          | 0,4796 | 0,0003214  |
| TcCLB.506235.20  | guide RNA associated protein 1, putative (GAP1)          | 0,4795 | 2,03E-09   |
| TcCLB.509453.70  | protein transport protein Sec24C, putative               | 0,4795 | 1,399E-08  |
| TcCLB.506145.20  | hypothetical protein, conserved                          | 0,4793 | 2,57E-08   |
| TcCLB.506581.50  | hypothetical protein, conserved                          | 0,4793 | 0,0007767  |
| TcCLB.506437.10  | amastin, putative                                        | 0,4792 | 0,0003474  |
| TcCLB.511419.60  | NADH-ubiquinone oxidoreductase complex I subunit, puta   | 0,4789 | 0,00005681 |
| TcCLB.511285.70  | hypothetical protein, conserved                          | 0,4788 | 2,828E-08  |
| TcCLB.511115.10  | hypothetical protein, conserved                          | 0,4787 | 1,512E-06  |
| TcCLB.511255.430 | trans-sialidase (pseudogene), putative                   | 0,4786 | 0,08786    |
| TcCLB.510625.10  | dispersed gene family protein 1 (DGF-1), putative        | 0,4784 | 0,0973     |
| TcCLB.508449.20  | retrotransposon hot spot protein (RHS, pseudogene), puta | 0,4782 | 0,0003421  |
| TcCLB.506211.190 | hypothetical protein, conserved                          | 0,4781 | 1,617E-07  |
| TcCLB.511279.60  | hypothetical protein, conserved                          | 0,4781 | 5,015E-06  |
| TcCLB.508629.58  | hypothetical protein, conserved (pseudogene)             | 0,4781 | 8,362E-06  |
| TcCLB.508153.480 | hypothetical protein, conserved                          | 0,478  | 1,569E-09  |
| TcCLB.511827.90  | hypothetical protein, conserved                          | 0,4779 | 0,01862    |
| TcCLB.510877.30  | hypothetical protein, conserved                          | 0,4778 | 8,05E-10   |
| TcCLB.510661.110 | Present in the outer mitochondrial membrane proteome 7   | 0,4778 | 1,173E-06  |
| TcCLB.510757.30  | hypothetical protein, conserved                          | 0,4776 | 0,002907   |
| TcCLB.506887.80  | hypothetical protein, conserved                          | 0,4775 | 0,002145   |
| TcCLB.506153.3   | hypothetical protein, conserved                          | 0,4774 | 0,0005168  |
| TcCLB.510363.19  | trans-sialidase (pseudogene), putative                   | 0,4774 | 0,05578    |
| TcCLB.506513.200 | histone H2A, putative                                    | 0,4774 | 0,3818     |
| TcCLB.507993.200 | hypothetical protein, conserved                          | 0,4773 | 1,066E-07  |
| TcCLB.503623.10  | dispersed gene family protein 1 (DGF-1), putative        | 0,4772 | 0,2847     |
| TcCLB.507467.104 | hypothetical protein, conserved                          | 0,4771 | 0,004094   |
| TcCLB.510187.280 | hypothetical protein, conserved                          | 0,4768 | 0,0003136  |
| TcCLB.509969.20  | surface protease GP63 (pseudogene), putative             | 0,4768 | 0,09522    |
| TcCLB.510317.7   | Present in the outer mitochondrial membrane proteome 2   | 0,4767 | 3,462E-06  |
| TcCLB.508589.51  | ATP-dependent DEAD/H RNA helicase (pseudogene), puta     | 0,4767 | 0,06381    |
| TcCLB.503881.39  | ribosomal protein L38, putative                          | 0,4765 | 0,00001939 |
| TcCLB.510239.10  | dispersed gene family protein 1 (DGF-1), putative        | 0,4764 | 0,1995     |
| TcCLB.506789.210 | paraflagellar rod protein, putative                      | 0,4762 | 8,384E-06  |
| TcCLB.503909.100 | mannosyltransferase, putative                            | 0,4762 | 0,00005365 |
| TcCLB.508901.10  | hypothetical protein, conserved                          | 0,4762 | 0,0002634  |
| TcCLB.509751.20  | hypothetical protein, conserved                          | 0,4761 | 8,802E-06  |
| TcCLB.506885.20  | hypothetical protein, conserved                          | 0,476  | 5,779E-07  |
| TcCLB.511491.70  | endosomal integral membrane protein, putative            | 0,476  | 0,00001282 |
| TcCLB.508909.339 | hypothetical protein, conserved                          | 0,4757 | 0,00005693 |

|                  |                                                          |        |            |
|------------------|----------------------------------------------------------|--------|------------|
| TcCLB.509671.60  | hypothetical protein                                     | 0,4756 | 0,002411   |
| TcCLB.511421.90  | hypothetical protein, conserved                          | 0,4755 | 0,0001697  |
| TcCLB.511133.4   | DNA repair and recombination helicase protein PIF6, puta | 0,4755 | 0,0002333  |
| TcCLB.506957.100 | hypothetical protein, conserved                          | 0,4755 | 0,0009976  |
| TcCLB.509427.80  | hypothetical protein                                     | 0,4754 | 0,214      |
| TcCLB.507649.10  | hypothetical protein, conserved                          | 0,4753 | 0,0009857  |
| TcCLB.511725.174 | small nuclear ribonucleoprotein Sm-G, putative           | 0,4752 | 0,0001442  |
| TcCLB.511895.40  | hypothetical protein                                     | 0,4751 | 0,0007507  |
| TcCLB.507019.30  | ribosome biogenesis regulatory protein (RRS1), putative  | 0,4749 | 0,00002381 |
| TcCLB.509459.50  | hypothetical protein, conserved                          | 0,4748 | 0,00003724 |
| TcCLB.506821.20  | ATP-dependent Clp protease subunit, heat shock protein 1 | 0,4747 | 1,367E-08  |
| TcCLB.507911.60  | retrotransposon hot spot protein (RHS, pseudogene), puta | 0,4747 | 0,1377     |
| TcCLB.503811.70  | hypothetical protein, conserved                          | 0,4745 | 0,00000176 |
| TcCLB.510517.90  | hypothetical protein, conserved                          | 0,4745 | 0,0007233  |
| TcCLB.506303.160 | hypothetical protein                                     | 0,4744 | 0,0000278  |
| TcCLB.510259.6   | DNA polymerase delta catalytic subunit, putative (fragme | 0,4743 | 5,171E-06  |
| TcCLB.506529.380 | ser/thr protein phosphatase, putative                    | 0,4742 | 1,605E-10  |
| TcCLB.510421.250 | hypothetical protein, conserved                          | 0,4741 | 7,168E-07  |
| TcCLB.511353.60  | hypothetical protein, conserved                          | 0,474  | 0,0008165  |
| TcCLB.508737.30  | mitochondrial RNA binding protein 1                      | 0,4739 | 1,706E-11  |
| TcCLB.503651.30  | hypothetical protein                                     | 0,4739 | 1,714E-06  |
| TcCLB.509237.60  | UDP-Gal or UDP-GlcNAc-dependent glycosyltransferase, Ꞥ   | 0,4733 | 0,0009752  |
| TcCLB.506503.170 | hypothetical protein, conserved                          | 0,4731 | 0,0182     |
| TcCLB.509391.10  | Flagellar calcium-binding protein 24, putative           | 0,4731 | 0,2793     |
| TcCLB.508839.40  | hypothetical protein, conserved                          | 0,473  | 0,0007291  |
| TcCLB.415187.19  | hypothetical protein, conserved (fragment)               | 0,473  | 0,04911    |
| TcCLB.510077.40  | small GTP-binding protein RAB6, putative                 | 0,4729 | 0,0007781  |
| TcCLB.511013.10  | retrotransposon hot spot protein (RHS, pseudogene), puta | 0,4728 | 0,008631   |
| TcCLB.509617.80  | ABC transporter, putative                                | 0,4725 | 1,438E-06  |
| TcCLB.408437.20  | hypothetical protein, conserved                          | 0,4721 | 0,006827   |
| TcCLB.510759.70  | hypothetical protein, conserved                          | 0,472  | 6,831E-08  |
| TcCLB.507809.74  | signal peptidase type I, putative                        | 0,472  | 0,00009429 |
| TcCLB.503437.10  | retrotransposon hot spot protein (RHS, pseudogene), puta | 0,4719 | 0,002156   |
| TcCLB.510579.110 | hypothetical protein, conserved                          | 0,4716 | 3,258E-08  |
| TcCLB.509153.40  | hypothetical protein, conserved                          | 0,4716 | 2,404E-07  |
| TcCLB.506529.370 | hypothetical protein                                     | 0,4716 | 0,002213   |
| TcCLB.506623.60  | dispersed gene family protein 1 (DGF-1), putative        | 0,4715 | 0,09367    |
| TcCLB.506575.40  | hypothetical protein                                     | 0,4714 | 4,446E-06  |
| TcCLB.507601.110 | prolyl oligopeptidase (pseudogene), putative             | 0,4714 | 4,674E-06  |
| TcCLB.507063.144 | hypothetical protein, conserved                          | 0,4714 | 0,001206   |
| TcCLB.507791.20  | N-acetyltransferase complex ARD1 subunit (pseudogene),   | 0,4714 | 0,1136     |
| TcCLB.506563.190 | calpain-like cysteine peptidase, putative                | 0,4713 | 2,715E-07  |
| TcCLB.509029.40  | hypothetical protein, conserved                          | 0,4713 | 0,00000611 |
| TcCLB.507515.60  | hypothetical protein, conserved                          | 0,4713 | 0,0002915  |
| TcCLB.506953.10  | hypothetical protein, conserved (pseudogene)             | 0,4713 | 0,1161     |



|                  |                                                               |        |            |
|------------------|---------------------------------------------------------------|--------|------------|
| TcCLB.506035.20  | dispersed gene family protein 1 (DGF-1, pseudogene), put      | 0,4711 | 0,00009739 |
| TcCLB.511801.44  | DNA-dependent RNA polymerases, putative                       | 0,4711 | 0,0004204  |
| TcCLB.511817.300 | hypothetical protein, conserved                               | 0,471  | 7,003E-06  |
| TcCLB.506945.300 | V-type ATPase, C subunit, putative                            | 0,4709 | 6,442E-06  |
| TcCLB.507033.10  | hypothetical protein, conserved                               | 0,4707 | 7E-09      |
| TcCLB.503687.10  | regulator of chromosome condensation (RCC1), putative         | 0,4704 | 0,0001475  |
| TcCLB.510741.180 | ATP-dependent RNA helicase, putative                          | 0,4702 | 1,216E-08  |
| TcCLB.510969.40  | hypothetical protein, conserved                               | 0,4702 | 0,00003104 |
| TcCLB.510063.39  | DNA repair protein, putative                                  | 0,4701 | 8,685E-06  |
| TcCLB.506743.30  | 50S ribosomal protein L17, putative                           | 0,4701 | 0,001107   |
| TcCLB.505957.80  | retrotransposon hot spot protein (RHS, pseudogene), puta      | 0,4695 | 0,0003123  |
| TcCLB.511499.69  | hypothetical protein (fragment)                               | 0,4695 | 0,007445   |
| TcCLB.505931.50  | histone H3, putative                                          | 0,4695 | 0,05015    |
| TcCLB.507093.339 | hypothetical protein, conserved                               | 0,4694 | 8,763E-06  |
| TcCLB.503527.29  | hypothetical protein, conserved                               | 0,4693 | 0,00008035 |
| TcCLB.509965.310 | hypothetical protein, conserved (pseudogene)                  | 0,4691 | 0,00001348 |
| TcCLB.511663.40  | trans-sialidase (pseudogene), putative                        | 0,4691 | 0,001937   |
| TcCLB.508153.780 | hypothetical protein                                          | 0,469  | 2,606E-07  |
| TcCLB.410337.10  | trans-sialidase (pseudogene), putative                        | 0,469  | 0,2378     |
| TcCLB.508607.60  | beta galactofuranosyl glycosyltransferase, putative           | 0,4689 | 0,0256     |
| TcCLB.511367.290 | hypothetical protein, conserved                               | 0,4687 | 6,351E-06  |
| TcCLB.510525.10  | protein kinase, putative                                      | 0,4687 | 0,0004041  |
| TcCLB.507057.10  | hypothetical protein, conserved                               | 0,4685 | 0,0002173  |
| TcCLB.503749.30  | hypothetical protein, conserved                               | 0,4683 | 0,00001623 |
| TcCLB.509065.160 | eukaryotic translation initiation factor 3 subunit 7-like pro | 0,4679 | 4,43E-11   |
| TcCLB.511267.24  | hypothetical protein, conserved                               | 0,4679 | 0,0001472  |
| TcCLB.504411.20  | divalent cation tolerance protein, putative                   | 0,4679 | 0,06909    |
| TcCLB.508851.90  | hypothetical protein, conserved                               | 0,4678 | 0,0006914  |
| TcCLB.511115.49  | hypothetical protein, conserved                               | 0,4678 | 0,04284    |
| TcCLB.507933.10  | plectin, putative                                             | 0,4677 | 1,963E-09  |
| TcCLB.510301.60  | hypothetical protein, conserved                               | 0,4676 | 0,00003548 |
| TcCLB.506189.10  | nucleolar protein, putative                                   | 0,4675 | 0,0002366  |
| TcCLB.506127.9   | phosphoglycerate kinase, putative                             | 0,4675 | 0,05532    |
| TcCLB.506479.130 | cytidine triphosphate synthase, putative                      | 0,4671 | 0,00007262 |
| TcCLB.509965.190 | DREV methyltransferase, putative                              | 0,467  | 0,0002254  |
| TcCLB.507513.90  | RNA-editing complex protein MP100, putative                   | 0,4669 | 4,446E-08  |
| TcCLB.510877.150 | hypothetical protein, conserved                               | 0,4667 | 8,565E-07  |
| TcCLB.506357.130 | hypothetical protein, conserved                               | 0,4665 | 3,72E-11   |
| TcCLB.509055.20  | hypothetical protein, conserved                               | 0,4664 | 5,948E-06  |
| TcCLB.507603.230 | hydroxyacylglutathione hydrolase, putative                    | 0,4663 | 0,004528   |
| TcCLB.508443.20  | heat shock protein-like protein, putative                     | 0,4659 | 0,0008236  |
| TcCLB.504045.130 | kinesin, putative (fragment)                                  | 0,4657 | 0,06073    |
| TcCLB.507023.120 | aldehyde dehydrogenase family, putative                       | 0,4656 | 0,0002947  |
| TcCLB.511789.10  | dispersed gene family protein 1 (DGF-1, pseudogene), put      | 0,4656 | 0,2112     |
| TcCLB.510577.40  | hypothetical protein, conserved                               | 0,4655 | 0,0002161  |

|                  |                                                          |        |            |
|------------------|----------------------------------------------------------|--------|------------|
| TcCLB.507427.30  | retrotransposon hot spot protein (RHS, pseudogene), puta | 0,4654 | 0,001795   |
| TcCLB.508821.30  | hypothetical protein                                     | 0,4653 | 3,719E-08  |
| TcCLB.506247.470 | hypothetical protein, conserved                          | 0,4651 | 3,961E-08  |
| TcCLB.505183.14  | hypothetical protein, conserved                          | 0,4651 | 0,0007238  |
| TcCLB.511249.34  | hypothetical protein, conserved                          | 0,4651 | 0,0009315  |
| TcCLB.510001.10  | hypothetical Zinc-finger containing protein              | 0,4651 | 0,002563   |
| TcCLB.507883.100 | malate dehydrogenase, putative                           | 0,465  | 0,00003803 |
| TcCLB.507253.10  | retrotransposon hot spot (RHS) protein, putative         | 0,465  | 0,001163   |
| TcCLB.506959.20  | hypothetical protein, conserved                          | 0,4649 | 1,517E-08  |
| TcCLB.509161.110 | hypothetical protein, conserved                          | 0,4649 | 2,961E-08  |
| TcCLB.507491.151 | flagellar calcium-binding protein, putative              | 0,4648 | 0,0000543  |
| TcCLB.504143.10  | hypothetical protein, conserved                          | 0,4648 | 0,001015   |
| TcCLB.506559.80  | Sir2-related protein 3, putative (SIR2rp3)               | 0,4646 | 0,001586   |
| TcCLB.509941.70  | dispersed gene family protein 1 (DGF-1, pseudogene), put | 0,4645 | 0,02409    |
| TcCLB.506389.39  | elongation factor 1-gamma (EF-1-gamma, pseudogene),      | 0,464  | 6,677E-06  |
| TcCLB.508881.30  | hypothetical protein, conserved                          | 0,4639 | 0,0002482  |
| TcCLB.507475.30  | retrotransposon hot spot protein (RHS, pseudogene), puta | 0,4639 | 0,0005051  |
| TcCLB.511807.80  | RNA capping enzyme, nuclear (Cgm1)                       | 0,4638 | 1,623E-09  |
| TcCLB.508741.320 | casein kinase II, alpha chain, putative                  | 0,4638 | 0,0000177  |
| TcCLB.507019.50  | hypothetical protein, conserved                          | 0,4638 | 0,0004152  |
| TcCLB.510149.90  | Golgi vesicular membrane trafficking protein, putative   | 0,4638 | 0,008665   |
| TcCLB.510241.10  | hypothetical protein, conserved                          | 0,4636 | 3,531E-07  |
| TcCLB.508761.260 | mucin TcMUCII, putative                                  | 0,4636 | 0,009523   |
| TcCLB.506683.19  | GMP synthase (pseudogene), putative                      | 0,4635 | 0,00003599 |
| TcCLB.506435.424 | hypothetical protein, conserved                          | 0,4634 | 0,001986   |
| TcCLB.505073.10  | hypothetical protein                                     | 0,4633 | 3,403E-07  |
| TcCLB.509371.10  | dispersed gene family protein 1 (DGF-1), putative        | 0,4633 | 0,2318     |
| TcCLB.508539.40  | hypothetical protein, conserved                          | 0,4632 | 0,001217   |
| TcCLB.509337.10  | hypothetical protein, conserved                          | 0,463  | 0,0000337  |
| TcCLB.507001.20  | hypothetical protein, conserved                          | 0,463  | 0,003218   |
| TcCLB.506975.9   | REL2, putative                                           | 0,4629 | 0,02119    |
| TcCLB.506945.150 | hypothetical protein                                     | 0,4628 | 0,001663   |
| TcCLB.509153.50  | hypothetical protein, conserved                          | 0,4626 | 0,0001318  |
| TcCLB.510755.98  | kinetoplastid membrane protein KMP-11, putative          | 0,4626 | 0,02317    |
| TcCLB.510181.90  | hypothetical protein, conserved                          | 0,4624 | 0,000132   |
| TcCLB.503909.90  | hypothetical protein                                     | 0,462  | 0,002627   |
| TcCLB.506195.10  | glucose-6-phosphate dehydrogenase (pseudogene), putati   | 0,462  | 0,004133   |
| TcCLB.505983.20  | nucleosome assembly protein-like protein, putative       | 0,4619 | 5,001E-09  |
| TcCLB.509891.70  | hypothetical protein, conserved (pseudogene)             | 0,4618 | 0,00028    |
| TcCLB.506933.30  | hypothetical protein, conserved                          | 0,4617 | 5,707E-06  |
| TcCLB.510105.80  | folylpolyglutamate synthetase (FPGS)                     | 0,4617 | 0,0000938  |
| TcCLB.510045.20  | ABC transporter, putative                                | 0,4615 | 0,004627   |
| TcCLB.510719.310 | hypothetical protein, conserved                          | 0,4614 | 1,633E-06  |
| TcCLB.507001.34  | hypothetical protein, conserved                          | 0,4614 | 0,0003829  |
| TcCLB.506195.190 | intraflagellar transport protein 81, putative (IFT81)    | 0,4613 | 1,606E-08  |

|                  |                                                           |        |            |
|------------------|-----------------------------------------------------------|--------|------------|
| TcCLB.508589.41  | N-acetyltransferase complex ARD1 subunit (pseudogene),    | 0,4612 | 0,203      |
| TcCLB.511725.280 | hypothetical protein, conserved                           | 0,461  | 1,447E-06  |
| TcCLB.511257.40  | hypothetical protein, conserved                           | 0,461  | 0,00004528 |
| TcCLB.503439.61  | retrotransposon hot spot protein (RHS, pseudogene), puta  | 0,461  | 0,0003685  |
| TcCLB.508401.90  | N-acetyltransferase complex ARD1 subunit (pseudogene),    | 0,461  | 0,0301     |
| TcCLB.511017.40  | hd phosphohydrolase family protein                        | 0,4609 | 0,01973    |
| TcCLB.506431.5   | trans-sialidase, putative (pseudogene)                    | 0,4606 | 0,2653     |
| TcCLB.509051.40  | adenosine kinase, putative                                | 0,4605 | 4,082E-08  |
| TcCLB.507093.60  | hypothetical protein, conserved                           | 0,4604 | 1,502E-06  |
| TcCLB.511395.10  | hypothetical protein, conserved                           | 0,4604 | 0,0003743  |
| TcCLB.511807.36  | hypothetical protein                                      | 0,4603 | 0,00004367 |
| TcCLB.508659.30  | hypothetical protein, conserved                           | 0,4601 | 7,566E-06  |
| TcCLB.506155.120 | glycosyl hydrolase, putative                              | 0,4601 | 0,00001144 |
| TcCLB.507601.70  | dihydrolipoamide branched chain transacylase, putative    | 0,46   | 0,00002829 |
| TcCLB.511149.210 | mucin TcMUCII, putative                                   | 0,46   | 0,1495     |
| TcCLB.509027.24  | hypothetical protein, conserved                           | 0,4599 | 0,0005084  |
| TcCLB.508547.180 | hypothetical protein, conserved                           | 0,4598 | 1,422E-06  |
| TcCLB.507583.70  | ribonuclease inhibitor, putative                          | 0,4598 | 0,0001594  |
| TcCLB.506847.30  | retrotransposon hot spot protein (RHS, pseudogene), puta  | 0,4598 | 0,0002915  |
| TcCLB.510863.30  | hypothetical protein, conserved                           | 0,4597 | 0,0002736  |
| TcCLB.511629.30  | hypothetical protein, conserved                           | 0,4596 | 0,0006713  |
| TcCLB.510279.276 | hypothetical protein, conserved (pseudogene)              | 0,4596 | 0,09492    |
| TcCLB.506265.20  | hypothetical protein, conserved                           | 0,4595 | 7,904E-07  |
| TcCLB.511773.35  | hypothetical protein, conserved (pseudogene)              | 0,4591 | 0,008095   |
| TcCLB.504131.90  | hypothetical protein, conserved                           | 0,4588 | 0,00001793 |
| TcCLB.510879.150 | hypothetical protein, conserved                           | 0,4587 | 0,00002507 |
| TcCLB.506533.142 | mucin TcSMUGL, putative                                   | 0,4587 | 0,001075   |
| TcCLB.503991.30  | hypothetical protein, conserved                           | 0,4584 | 9,024E-06  |
| TcCLB.511713.40  | ribosome biogenesis protein TSR3, putative (tsr3)         | 0,4584 | 0,001667   |
| TcCLB.506247.100 | hypothetical protein, conserved                           | 0,458  | 0,004494   |
| TcCLB.507603.170 | hypothetical protein, conserved                           | 0,4576 | 0,00001049 |
| TcCLB.508895.40  | hypothetical protein, conserved                           | 0,4576 | 0,00008015 |
| TcCLB.508971.50  | ubiquitin-protein ligase-like, putative                   | 0,4575 | 1,017E-06  |
| TcCLB.508831.66  | hypothetical protein, conserved                           | 0,4574 | 3,925E-06  |
| TcCLB.511727.129 | ribosomal protein L18, putative                           | 0,4573 | 3,435E-08  |
| TcCLB.511393.20  | rhomboid-like protein, putative                           | 0,4573 | 0,00001217 |
| TcCLB.506321.290 | stress-induced protein sti1, putative                     | 0,4572 | 3,274E-09  |
| TcCLB.508873.430 | trans-sialidase (pseudogene), putative                    | 0,4568 | 0,01137    |
| TcCLB.510311.170 | hypothetical protein, conserved                           | 0,4566 | 0,0002873  |
| TcCLB.506259.30  | retrotransposon hot spot protein (RHS, pseudogene), puta  | 0,4564 | 0,00002775 |
| TcCLB.511863.4   | retrotransposon hot spot (RHS) protein, putative (fragmer | 0,4564 | 0,0003553  |
| TcCLB.508857.30  | trans-sialidase, Group I, putative                        | 0,4563 | 0,0001207  |
| TcCLB.511293.10  | extracellular receptor, putative                          | 0,4562 | 0,001782   |
| TcCLB.511249.60  | protein kinase, putative                                  | 0,4561 | 5,169E-06  |
| TcCLB.511055.40  | glycine dehydrogenase [decarboxylating] (pseudogene), pi  | 0,4561 | 0,002733   |

|                  |                                                        |        |            |
|------------------|--------------------------------------------------------|--------|------------|
| TcCLB.509019.30  | dispersed gene family protein 1 (DGF-1), putative      | 0,4561 | 0,08165    |
| TcCLB.504835.20  | 3-methylcrotonyl-CoA carboxylase, putative             | 0,4559 | 1,202E-06  |
| TcCLB.508299.80  | threonyl-tRNA synthetase, putative                     | 0,4558 | 9,273E-06  |
| TcCLB.509053.170 | DREV methyltransferase, putative                       | 0,4558 | 0,0003685  |
| TcCLB.510053.70  | hypothetical protein, conserved                        | 0,4552 | 6,426E-08  |
| TcCLB.511211.104 | hypothetical protein, conserved                        | 0,4551 | 0,003313   |
| TcCLB.510309.30  | PTP1-interacting protein, 39 kDa, putative             | 0,4551 | 0,003446   |
| TcCLB.511903.90  | hypothetical protein, conserved                        | 0,4549 | 0,00003681 |
| TcCLB.510121.50  | calmodulin, putative                                   | 0,4547 | 0,009733   |
| TcCLB.506797.70  | lysophospholipase, putative                            | 0,4544 | 8,042E-06  |
| TcCLB.508823.40  | hypothetical protein, conserved                        | 0,4544 | 0,001967   |
| TcCLB.508269.76  | N-acetyltransferase complex ARD1 subunit (pseudogene), | 0,4542 | 0,1315     |
| TcCLB.506425.150 | hypothetical protein                                   | 0,4541 | 0,003643   |
| TcCLB.506533.34  | phosphatidylinositol kinase related protein, putative  | 0,454  | 1,193E-08  |
| TcCLB.508303.50  | hypothetical protein, conserved                        | 0,4539 | 0,00115    |
| TcCLB.507559.40  | hypothetical protein, conserved                        | 0,4538 | 0,00002713 |
| TcCLB.511837.60  | hypothetical protein, conserved                        | 0,4534 | 0,0001006  |
| TcCLB.507519.120 | hypothetical protein, conserved                        | 0,4534 | 0,001463   |
| TcCLB.510943.30  | hypothetical protein, conserved                        | 0,4534 | 0,002365   |
| TcCLB.511151.100 | Unconventional myosin                                  | 0,4533 | 2,473E-07  |
| TcCLB.506245.160 | retrotransposon hot spot (RHS) protein, putative       | 0,4533 | 0,06515    |
| TcCLB.507625.130 | hypothetical protein, conserved                        | 0,4532 | 0,0001528  |
| TcCLB.508133.10  | hypothetical protein                                   | 0,4531 | 0,0006617  |
| TcCLB.510421.210 | hypothetical protein, conserved                        | 0,4529 | 1,392E-06  |
| TcCLB.509111.19  | hypothetical protein, conserved                        | 0,4529 | 0,02721    |
| TcCLB.509879.40  | fumarate hydratase, putative                           | 0,4527 | 0,001406   |
| TcCLB.508823.130 | hypothetical protein, conserved                        | 0,4525 | 6,594E-08  |
| TcCLB.509489.20  | hypothetical protein, conserved                        | 0,4523 | 0,00004047 |
| TcCLB.508817.10  | hypothetical protein, conserved                        | 0,4523 | 0,006985   |
| TcCLB.510007.50  | hypothetical protein, conserved                        | 0,4522 | 5,934E-06  |
| TcCLB.508641.290 | hypothetical protein, conserved                        | 0,4522 | 0,0002044  |
| TcCLB.511245.190 | hypothetical protein, conserved                        | 0,4522 | 0,0007536  |
| TcCLB.509497.20  | hypothetical protein, conserved                        | 0,4521 | 0,0006297  |
| TcCLB.506435.60  | hypothetical protein, conserved                        | 0,452  | 0,000171   |
| TcCLB.510287.4   | Mutt-Nudix-related hydrolase, putative (fragment)      | 0,452  | 0,1761     |
| TcCLB.506771.18  | hypothetical protein, conserved                        | 0,4519 | 0,000333   |
| TcCLB.506017.41  | N-acetyltransferase complex ARD1 subunit (pseudogene), | 0,4518 | 0,05109    |
| TcCLB.506457.10  | metallo-peptidase, Clan MG, Family M24 (MetAP2)        | 0,4517 | 3,914E-06  |
| TcCLB.503809.75  | hypothetical protein, conserved                        | 0,4517 | 0,008103   |
| TcCLB.508153.390 | hypothetical protein, conserved                        | 0,4516 | 0,00008277 |
| TcCLB.506193.20  | hypothetical protein, conserved                        | 0,4516 | 0,0001215  |
| TcCLB.511461.50  | nuclear transmembrane protein, putative (NP)           | 0,4516 | 0,0004735  |
| TcCLB.510227.10  | hypothetical protein, conserved                        | 0,4516 | 0,00521    |
| TcCLB.510359.100 | hypothetical protein, conserved                        | 0,4514 | 0,006551   |
| TcCLB.511649.110 | hypothetical protein, conserved                        | 0,4512 | 2,751E-06  |

|                  |                                                              |        |            |
|------------------|--------------------------------------------------------------|--------|------------|
| TcCLB.509023.150 | integral membrane transport protein, putative                | 0,4511 | 0,0008071  |
| TcCLB.507023.140 | hypothetical protein                                         | 0,4511 | 0,001516   |
| TcCLB.510443.9   | valyl-tRNA synthetase, putative                              | 0,451  | 1,529E-07  |
| TcCLB.509551.10  | protein kinase, putative                                     | 0,451  | 0,0002001  |
| TcCLB.504175.40  | dual specificity protein phosphatase, putative               | 0,4509 | 8,601E-07  |
| TcCLB.503487.50  | UDP-Gal or UDP-GlcNAc-dependent glycosyltransferase, $\rho$  | 0,4509 | 0,00008276 |
| TcCLB.508317.10  | cysteine proteinase, putative                                | 0,4507 | 0,00007315 |
| TcCLB.507485.150 | amastin, putative                                            | 0,4503 | 0,00001307 |
| TcCLB.504047.20  | hypothetical protein, conserved                              | 0,4502 | 0,0001666  |
| TcCLB.511421.200 | ARM-like helical domain-containing protein                   | 0,4501 | 0,00001449 |
| TcCLB.507521.70  | cyclophilin, putative                                        | 0,4501 | 0,0008363  |
| TcCLB.508051.30  | protein kinase, putative                                     | 0,4499 | 0,0001898  |
| TcCLB.510173.100 | hypothetical protein, conserved                              | 0,4499 | 0,003141   |
| TcCLB.508531.10  | glycine dehydrogenase (pseudogene), putative                 | 0,4499 | 0,05092    |
| TcCLB.506201.50  | hypothetical protein, conserved                              | 0,4498 | 0,005545   |
| TcCLB.509769.70  | DNA polymerase theta (helicase domain only), putative        | 0,4496 | 1,171E-08  |
| TcCLB.509797.30  | hypothetical protein, conserved                              | 0,4496 | 0,00005644 |
| TcCLB.510183.20  | dipeptidyl-peptidase 8-like serine peptidase                 | 0,4493 | 2,249E-07  |
| TcCLB.505097.20  | hypothetical protein, conserved (pseudogene)                 | 0,4493 | 0,005073   |
| TcCLB.504213.140 | hypothetical protein, conserved                              | 0,4493 | 0,02754    |
| TcCLB.511479.48  | hypothetical protein, conserved (fragment)                   | 0,4493 | 0,07178    |
| TcCLB.511229.9   | replication factor C, subunit 4, putative                    | 0,4491 | 0,01091    |
| TcCLB.506743.150 | proteasome 26S non-ATPase subunit 9, putative                | 0,449  | 0,002032   |
| TcCLB.503809.100 | GUP1, putative                                               | 0,4489 | 0,00000194 |
| TcCLB.511075.20  | notchless homolog, putative                                  | 0,4488 | 1,365E-06  |
| TcCLB.508207.54  | hypothetical protein, conserved                              | 0,4488 | 0,004331   |
| TcCLB.504047.10  | hypothetical protein, conserved                              | 0,4488 | 0,0135     |
| TcCLB.507993.190 | serine/threonine protein phosphatase type 5, putative        | 0,4485 | 7,489E-07  |
| TcCLB.506175.110 | hypothetical protein, conserved                              | 0,4485 | 1,744E-06  |
| TcCLB.504431.30  | Present in the outer mitochondrial membrane proteome $\zeta$ | 0,4484 | 0,00001233 |
| TcCLB.509769.90  | mitochondrial carrier protein, putative                      | 0,4484 | 0,00003474 |
| TcCLB.450489.10  | histone acetyltransferase, putative                          | 0,4484 | 0,0009233  |
| TcCLB.427303.10  | 5'-3' exoribonuclease A, putative (fragment) (XRNA)          | 0,4482 | 4,84E-07   |
| TcCLB.509233.20  | retrotransposon hot spot protein (RHS, pseudogene), puta     | 0,4482 | 0,004569   |
| TcCLB.506163.60  | hypothetical protein                                         | 0,4481 | 6,661E-06  |
| TcCLB.503681.9   | hypothetical protein, conserved                              | 0,4481 | 0,00002293 |
| TcCLB.509715.9   | Ribosomal RNA processing protein 41A (RRP41A)                | 0,4478 | 0,0005205  |
| TcCLB.510187.199 | hypothetical protein, conserved                              | 0,4478 | 0,001119   |
| TcCLB.510439.10  | heat shock protein 70, putative                              | 0,4477 | 0,0005081  |
| TcCLB.506649.30  | hypothetical protein, conserved                              | 0,4476 | 7,818E-07  |
| TcCLB.510735.70  | hypothetical protein, conserved                              | 0,4476 | 0,0003962  |
| TcCLB.511671.90  | hypothetical protein, conserved                              | 0,4475 | 0,0003823  |
| TcCLB.507063.160 | hypothetical protein, conserved                              | 0,4474 | 5,386E-06  |
| TcCLB.510087.20  | hypothetical protein, conserved                              | 0,4474 | 0,000769   |
| TcCLB.434259.19  | hypothetical protein, conserved                              | 0,4474 | 0,002865   |

|                  |                                                          |        |            |
|------------------|----------------------------------------------------------|--------|------------|
| TcCLB.509893.10  | hypothetical protein                                     | 0,4472 | 0,0001517  |
| TcCLB.506887.20  | hypothetical protein, conserved                          | 0,4471 | 0,0003591  |
| TcCLB.503767.5   | potassium voltage-gated channel, putative                | 0,4471 | 0,07657    |
| TcCLB.503823.50  | hypothetical protein, conserved                          | 0,447  | 0,00005103 |
| TcCLB.511369.20  | elongation factor 1-alpha, putative                      | 0,447  | 0,008936   |
| TcCLB.510765.60  | 60S ribosomal protein L5, putative                       | 0,4469 | 7,199E-10  |
| TcCLB.508273.70  | hypothetical protein, conserved                          | 0,4469 | 0,002234   |
| TcCLB.506629.220 | isovaleryl-coA dehydrogenase, putative                   | 0,4468 | 0,00002415 |
| TcCLB.510853.50  | beta galactofuranosyl glycosyltransferase, putative      | 0,4467 | 0,2246     |
| TcCLB.507951.260 | aspartic peptidase, clan AD, family A22B, putative       | 0,4466 | 1,848E-06  |
| TcCLB.508899.90  | hypothetical protein                                     | 0,4465 | 0,0002979  |
| TcCLB.511049.30  | hypothetical protein, conserved                          | 0,4461 | 0,003053   |
| TcCLB.506713.20  | hypothetical protein, conserved                          | 0,446  | 0,00003138 |
| TcCLB.507639.40  | proteasome subunit beta type-5, putative                 | 0,4459 | 2,942E-06  |
| TcCLB.503545.20  | retrotransposon hot spot protein (RHS, pseudogene), puta | 0,4452 | 0,01066    |
| TcCLB.507509.50  | polypeptide deformylase-like protein, putative           | 0,445  | 0,00006579 |
| TcCLB.510039.70  | hypothetical protein, conserved                          | 0,4448 | 0,00153    |
| TcCLB.511071.100 | Glycerophosphoryl diester phosphodiesterase family, puta | 0,4446 | 9,726E-06  |
| TcCLB.506727.80  | hypothetical protein, conserved                          | 0,4446 | 0,0001257  |
| TcCLB.509965.229 | heat shock protein (pseudogene), putative                | 0,4445 | 0,004052   |
| TcCLB.506689.20  | hypothetical protein, conserved (pseudogene)             | 0,4444 | 0,001514   |
| TcCLB.506529.314 | hypothetical protein, conserved                          | 0,444  | 0,01133    |
| TcCLB.506297.220 | hypothetical protein, conserved                          | 0,4435 | 3,23E-08   |
| TcCLB.511825.130 | hypothetical protein                                     | 0,4435 | 0,01441    |
| TcCLB.505939.50  | hypothetical protein                                     | 0,4433 | 0,0004992  |
| TcCLB.510111.11  | trans-sialidase (pseudogene), putative                   | 0,4433 | 0,01885    |
| TcCLB.508727.50  | hypothetical protein, conserved                          | 0,443  | 0,0004885  |
| TcCLB.506315.70  | hypothetical protein, conserved                          | 0,443  | 0,0009199  |
| TcCLB.506661.130 | ion transport protein, putative                          | 0,4429 | 0,0001117  |
| TcCLB.511167.30  | hypothetical protein, conserved                          | 0,4428 | 0,00007882 |
| TcCLB.511685.40  | hypothetical protein                                     | 0,4427 | 0,00009818 |
| TcCLB.506595.104 | ribosomal P protein AGP2beta-1, putative                 | 0,4426 | 0,009096   |
| TcCLB.504215.59  | hypothetical protein, conserved                          | 0,4425 | 0,00004108 |
| TcCLB.511897.19  | zinc-finger multi-pass transmembrane protein, putative   | 0,4424 | 0,0004087  |
| TcCLB.508153.180 | aspartyl aminopeptidase, putative                        | 0,442  | 1,136E-07  |
| TcCLB.504159.80  | histone deacetylase, putative                            | 0,442  | 0,0001475  |
| TcCLB.508307.170 | 60S acidic ribosomal protein, putative                   | 0,4419 | 0,001342   |
| TcCLB.511707.30  | hypothetical protein, conserved                          | 0,4418 | 2,221E-06  |
| TcCLB.503657.50  | hypothetical protein, conserved                          | 0,4418 | 0,0008212  |
| TcCLB.509497.30  | agmatinase, putative                                     | 0,4418 | 0,0009402  |
| TcCLB.509533.5   | retrotransposon hot spot protein (RHS, pseudogene), puta | 0,4416 | 3,028E-06  |
| TcCLB.511317.50  | hypothetical protein, conserved                          | 0,4416 | 0,0001241  |
| TcCLB.507083.40  | hypothetical protein, conserved                          | 0,4416 | 0,009155   |
| TcCLB.509237.80  | hypothetical protein, conserved                          | 0,4412 | 2,504E-06  |
| TcCLB.509063.10  | hypothetical protein, conserved                          | 0,4412 | 0,003858   |

|                  |                                                          |        |            |
|------------------|----------------------------------------------------------|--------|------------|
| TcCLB.507485.100 | hypothetical protein, conserved                          | 0,441  | 0,0001149  |
| TcCLB.508837.110 | hypothetical protein, conserved                          | 0,441  | 0,0003628  |
| TcCLB.509695.130 | dynein arm light chain, putative                         | 0,441  | 0,0005533  |
| TcCLB.510101.320 | hypothetical protein                                     | 0,4409 | 1,607E-06  |
| TcCLB.509069.30  | tubulin binding cofactor A-like protein, putative        | 0,4408 | 0,00652    |
| TcCLB.510347.10  | hypothetical protein                                     | 0,4406 | 8,898E-07  |
| TcCLB.509965.250 | ubiquitin fusion degradation protein 2, putative         | 0,4403 | 1,698E-07  |
| TcCLB.506943.130 | hypothetical protein, conserved                          | 0,4402 | 0,000388   |
| TcCLB.509219.50  | hypothetical protein, conserved (pseudogene)             | 0,4399 | 0,0007981  |
| TcCLB.511865.19  | frataxin-like, mitochondrial precursor, putative         | 0,4395 | 0,00115    |
| TcCLB.506625.150 | hypothetical protein, conserved                          | 0,4395 | 0,002737   |
| TcCLB.506493.100 | hypothetical protein, conserved                          | 0,4393 | 0,0005013  |
| TcCLB.504285.10  | retrotransposon hot spot protein (RHS, pseudogene), puta | 0,4392 | 0,009223   |
| TcCLB.511655.69  | ubiquitin-activating enzyme-like protein                 | 0,4391 | 0,0003761  |
| TcCLB.510717.40  | hypothetical protein, conserved                          | 0,439  | 0,00001689 |
| TcCLB.506357.190 | hypothetical protein, conserved                          | 0,439  | 0,00007792 |
| TcCLB.506363.40  | hypothetical protein, conserved                          | 0,439  | 0,001148   |
| TcCLB.485889.16  | hypothetical protein (fragment)                          | 0,439  | 0,01225    |
| TcCLB.506925.20  | hypothetical protein, conserved                          | 0,4389 | 0,0000108  |
| TcCLB.511055.60  | hypothetical protein, conserved                          | 0,4389 | 0,07446    |
| TcCLB.510149.120 | flagellar radial spoke protein-like, putative            | 0,4386 | 0,000629   |
| TcCLB.511191.10  | tyrosyl-DNA Phosphodiesterase (Tdp1), putative           | 0,4386 | 0,00666    |
| TcCLB.508805.100 | hypothetical protein, conserved                          | 0,4384 | 0,00001132 |
| TcCLB.509733.170 | Valosin-containing protein, putative (VCP)               | 0,4383 | 7,901E-07  |
| TcCLB.510061.40  | retrotransposon hot spot protein (RHS, pseudogene), puta | 0,4383 | 0,0009685  |
| TcCLB.506979.10  | hypothetical protein, conserved                          | 0,4382 | 0,0001671  |
| TcCLB.507591.9   | retrotransposon hot spot protein (RHS, pseudogene), puta | 0,4382 | 0,0002429  |
| TcCLB.433033.10  | retrotransposon hot spot protein (RHS, pseudogene), puta | 0,4382 | 0,0007656  |
| TcCLB.511171.40  | trans-sialidase (pseudogene), putative                   | 0,4381 | 0,0154     |
| TcCLB.506435.280 | hypothetical protein, conserved                          | 0,4379 | 0,00002697 |
| TcCLB.510243.30  | chaperone DNAJ protein, putative                         | 0,4379 | 0,00003433 |
| TcCLB.508045.4   | hypothetical protein, conserved                          | 0,4379 | 0,0005773  |
| TcCLB.510599.50  | hypothetical protein                                     | 0,4378 | 0,00001503 |
| TcCLB.506577.60  | hypothetical protein, conserved                          | 0,4378 | 0,00008102 |
| TcCLB.506167.30  | hypothetical protein, conserved                          | 0,4378 | 0,007428   |
| TcCLB.510659.90  | hypothetical protein, conserved                          | 0,4377 | 0,0008243  |
| TcCLB.510989.40  | hypothetical protein, conserved                          | 0,4376 | 0,0005577  |
| TcCLB.506807.30  | hypothetical protein, conserved                          | 0,4375 | 0,002313   |
| TcCLB.511613.180 | mucin-associated surface protein (MASP), putative        | 0,4375 | 0,1992     |
| TcCLB.511657.79  | hypothetical protein, conserved                          | 0,4374 | 0,05176    |
| TcCLB.510719.180 | hypothetical protein, conserved                          | 0,4371 | 0,00001216 |
| TcCLB.508445.20  | iron superoxide dismutase, putative                      | 0,437  | 7,388E-06  |
| TcCLB.506223.130 | hypothetical protein, conserved                          | 0,4369 | 0,0006648  |
| TcCLB.511181.80  | threonyl-tRNA synthetase, putative                       | 0,4368 | 2,207E-09  |
| TcCLB.503613.60  | acidocalcisomal pyrophosphatase, putative                | 0,4368 | 6,643E-06  |

|                  |                                                          |        |            |
|------------------|----------------------------------------------------------|--------|------------|
| TcCLB.511735.20  | hypothetical protein, conserved                          | 0,4368 | 0,001203   |
| TcCLB.505943.30  | hypothetical protein, conserved                          | 0,4367 | 0,0001037  |
| TcCLB.506789.300 | hypothetical protein, conserved                          | 0,4366 | 0,006918   |
| TcCLB.509499.20  | beta propeller protein, putative                         | 0,4365 | 0,00006942 |
| TcCLB.511817.110 | hypothetical protein, conserved                          | 0,4365 | 0,00008811 |
| TcCLB.510747.140 | hypothetical protein, conserved                          | 0,4365 | 0,001272   |
| TcCLB.508717.30  | phosphoribosylpyrophosphate synthetase, putative         | 0,4364 | 2,857E-06  |
| TcCLB.508109.50  | retrotransposon hot spot protein (RHS, pseudogene), puta | 0,4364 | 0,0109     |
| TcCLB.506945.70  | protein mkt1, putative                                   | 0,4363 | 2,706E-10  |
| TcCLB.511369.10  | elongation factor 1-alpha, putative                      | 0,4362 | 0,03041    |
| TcCLB.509875.60  | hypothetical protein                                     | 0,4362 | 0,2269     |
| TcCLB.509039.30  | hypothetical protein, conserved                          | 0,4361 | 0,00008167 |
| TcCLB.503527.10  | hypothetical protein, conserved                          | 0,4355 | 1,414E-09  |
| TcCLB.509151.50  | hypothetical protein, conserved                          | 0,4355 | 1,751E-07  |
| TcCLB.508559.90  | retrotransposon hot spot (RHS) protein, putative         | 0,4355 | 0,00137    |
| TcCLB.511389.114 | hypothetical protein, conserved                          | 0,4354 | 0,06084    |
| TcCLB.507053.80  | hypothetical protein, conserved                          | 0,4353 | 0,00001498 |
| TcCLB.509269.19  | sphingosine-1-phosphate phosphatase, putative            | 0,4349 | 0,00009429 |
| TcCLB.510407.90  | serine hydroxymethyltransferase, putative                | 0,4348 | 0,0001176  |
| TcCLB.508347.20  | O-6 methyl-guanine alkyl transferase, putative           | 0,4348 | 0,001749   |
| TcCLB.509965.380 | dTDP-glucose 4,6-dehydratase, putative                   | 0,4346 | 0,00001155 |
| TcCLB.508233.4   | protein transport protein Sec23A, putative (fragment)    | 0,4346 | 0,0002186  |
| TcCLB.508677.120 | hypothetical protein, conserved                          | 0,4345 | 0,02269    |
| TcCLB.511907.70  | short chain dehydrogenase/reductase, putative            | 0,4344 | 0,00003789 |
| TcCLB.509023.170 | hypothetical protein, conserved                          | 0,4343 | 0,000227   |
| TcCLB.508723.10  | hypothetical protein, conserved                          | 0,4341 | 0,0005436  |
| TcCLB.506503.140 | extracellular receptor, putative                         | 0,434  | 2,858E-06  |
| TcCLB.507817.30  | hypothetical protein, conserved                          | 0,4337 | 0,00008955 |
| TcCLB.511659.9   | hypothetical protein, conserved (fragment)               | 0,4337 | 0,0003435  |
| TcCLB.510105.50  | fibrillar, putative                                      | 0,4334 | 0,0000432  |
| TcCLB.506567.90  | hypothetical protein, conserved                          | 0,4332 | 0,0005267  |
| TcCLB.508169.80  | hypothetical protein, conserved                          | 0,4332 | 0,00337    |
| TcCLB.506953.49  | glucose-6-phosphate 1-dehydrogenase, putative            | 0,4331 | 0,114      |
| TcCLB.503891.100 | 20S proteasome subunit                                   | 0,433  | 0,0002365  |
| TcCLB.510733.30  | hypothetical protein, conserved                          | 0,433  | 0,02202    |
| TcCLB.511817.319 | hypothetical protein, conserved                          | 0,4328 | 0,003998   |
| TcCLB.503837.40  | hypothetical protein, conserved                          | 0,4327 | 0,03375    |
| TcCLB.511209.30  | hypothetical protein, conserved (pseudogene)             | 0,4325 | 6,523E-06  |
| TcCLB.504147.60  | chaperone DNAJ protein, putative                         | 0,4324 | 1,939E-07  |
| TcCLB.511301.120 | hypothetical protein, conserved                          | 0,4324 | 3,65E-07   |
| TcCLB.511621.180 | hypothetical protein, conserved                          | 0,4324 | 0,0001715  |
| TcCLB.507521.30  | hypothetical protein, conserved                          | 0,4324 | 0,008666   |
| TcCLB.508095.20  | methyltransferase, putative                              | 0,4323 | 2,753E-08  |
| TcCLB.511585.10  | hypothetical protein, conserved                          | 0,4323 | 0,00001401 |
| TcCLB.509829.20  | isovaleryl-coA dehydrogenase, putative                   | 0,4321 | 0,003683   |



|                  |                                                             |        |            |
|------------------|-------------------------------------------------------------|--------|------------|
| TcCLB.507625.99  | gamma-glutamylcysteine synthetase, putative                 | 0,4318 | 0,0001416  |
| TcCLB.510041.30  | hypothetical protein, conserved (fragment)                  | 0,4318 | 0,02711    |
| TcCLB.509967.120 | intraflagellar transport protein 172, putative              | 0,4315 | 2,899E-07  |
| TcCLB.510355.210 | hypothetical protein, conserved                             | 0,4313 | 4,094E-06  |
| TcCLB.507715.100 | hypothetical protein, conserved                             | 0,4312 | 0,00003854 |
| TcCLB.510663.70  | 6-phosphogluconate dehydrogenase, decarboxylating, putative | 0,4312 | 0,001825   |
| TcCLB.506121.9   | dispersed gene family protein 1 (DGF-1), putative           | 0,4312 | 0,1505     |
| TcCLB.506585.80  | hypothetical protein, conserved                             | 0,4309 | 0,002492   |
| TcCLB.506871.140 | cleavage and polyadenylation specificity factor, putative   | 0,4308 | 9,853E-08  |
| TcCLB.506963.40  | hypothetical protein, conserved                             | 0,4307 | 0,00004561 |
| TcCLB.511823.30  | hypothetical protein, conserved                             | 0,4306 | 0,00004569 |
| TcCLB.511801.60  | DEAD-box ATP-dependent RNA helicase, mitochondrial (N)      | 0,4305 | 1,516E-07  |
| TcCLB.509167.160 | hypothetical protein                                        | 0,4305 | 6,293E-06  |
| TcCLB.503609.32  | elongation factor 1-gamma (EF-1-gamma, pseudogene),         | 0,4305 | 0,3623     |
| TcCLB.510187.480 | phosphomannomutase, putative                                | 0,4304 | 0,0000192  |
| TcCLB.506673.40  | hypothetical protein, conserved                             | 0,4303 | 0,00005978 |
| TcCLB.510943.36  | hypothetical protein, conserved                             | 0,4303 | 0,00008975 |
| TcCLB.503431.20  | hypothetical protein, conserved                             | 0,4302 | 0,002536   |
| TcCLB.506605.130 | hypothetical protein, conserved                             | 0,43   | 0,001008   |
| TcCLB.511321.23  | cytidine deaminase-like protein                             | 0,4297 | 0,00128    |
| TcCLB.506247.10  | bloodstream- specific protein 2 precursor (fragment) (PDI)  | 0,4295 | 7,323E-06  |
| TcCLB.506265.120 | hypothetical protein, conserved                             | 0,4295 | 0,0000153  |
| TcCLB.508873.344 | mucin-associated surface protein (MASP, pseudogene), p      | 0,4295 | 0,1508     |
| TcCLB.504055.20  | hypothetical protein, conserved                             | 0,4294 | 0,002154   |
| TcCLB.504163.90  | hypothetical protein, conserved                             | 0,4293 | 0,0001207  |
| TcCLB.508331.41  | tryptophanyl-tRNA synthetase (pseudogene), putative         | 0,4293 | 0,1378     |
| TcCLB.505999.90  | phosphoglycerate kinase, putative                           | 0,429  | 2,374E-06  |
| TcCLB.509353.20  | Present in the outer mitochondrial membrane proteome 4      | 0,4289 | 0,004214   |
| TcCLB.511815.60  | prefoldin, putative                                         | 0,4288 | 0,00001314 |
| TcCLB.503703.100 | hypothetical protein, conserved                             | 0,4288 | 0,0001275  |
| TcCLB.511211.100 | hypothetical protein, conserved                             | 0,4288 | 0,0001325  |
| TcCLB.510579.10  | tyrosine phosphatase-like protein, putative                 | 0,4286 | 0,0001531  |
| TcCLB.510879.30  | hypothetical protein, conserved                             | 0,4282 | 3,594E-06  |
| TcCLB.506359.70  | hypothetical protein, conserved                             | 0,4282 | 0,002445   |
| TcCLB.510105.210 | metallo-peptidase, Clan MA(E) Family M41                    | 0,4279 | 1,387E-06  |
| TcCLB.506753.120 | DnaJ chaperone protein, putative                            | 0,4279 | 0,0001297  |
| TcCLB.414243.29  | inosine-guanine nucleoside hydrolase, putative (fragment)   | 0,4278 | 0,1178     |
| TcCLB.510123.20  | mitogen activated protein kinase, putative                  | 0,4273 | 1,927E-06  |
| TcCLB.505229.10  | Isoprenylcysteine alpha-carbonyl methylesterase, putative   | 0,4273 | 0,00001105 |
| TcCLB.504213.29  | hypothetical protein, conserved                             | 0,4273 | 0,00298    |
| TcCLB.511857.70  | hypothetical protein, conserved                             | 0,427  | 0,0000763  |
| TcCLB.507541.20  | hypothetical protein, conserved                             | 0,427  | 0,0001026  |
| TcCLB.511045.10  | hypothetical protein, conserved                             | 0,4269 | 0,0001207  |
| TcCLB.504143.20  | hypothetical protein, conserved                             | 0,4266 | 0,0009446  |
| TcCLB.509695.70  | hypothetical protein, conserved                             | 0,4265 | 0,00001856 |

|                  |                                                               |        |            |
|------------------|---------------------------------------------------------------|--------|------------|
| TcCLB.509669.140 | hypothetical protein, conserved                               | 0,4265 | 0,003664   |
| TcCLB.510747.150 | hypothetical protein, conserved                               | 0,4262 | 0,0002368  |
| TcCLB.506799.40  | hypothetical protein                                          | 0,4262 | 0,02484    |
| TcCLB.511807.22  | retrotransposon hot spot protein (RHS, pseudogene), puta      | 0,426  | 0,0002333  |
| TcCLB.511545.199 | AMP deaminase, putative                                       | 0,426  | 0,005958   |
| TcCLB.510877.130 | hypothetical protein, conserved                               | 0,4258 | 3,819E-06  |
| TcCLB.504115.30  | beta galactofuranosyl glycosyltransferase, putative           | 0,4257 | 0,0008445  |
| TcCLB.510307.94  | ATP-dependent DEAD/H RNA helicase (pseudogene), puta          | 0,4256 | 0,03595    |
| TcCLB.504835.10  | hypothetical protein, conserved                               | 0,4255 | 0,0004845  |
| TcCLB.506341.10  | N-acetylglucosamine-6-phosphate deacetylase-like protei       | 0,4253 | 0,002167   |
| TcCLB.506825.130 | hypothetical protein, conserved                               | 0,4252 | 0,00002872 |
| TcCLB.510431.70  | hypothetical protein, conserved                               | 0,4252 | 0,001862   |
| TcCLB.510089.180 | hypothetical protein, conserved                               | 0,425  | 0,0004987  |
| TcCLB.506821.170 | aquaporin-like protein, putative                              | 0,4249 | 0,00002159 |
| TcCLB.504425.70  | hypothetical protein, conserved                               | 0,4249 | 0,000206   |
| TcCLB.510311.180 | hypothetical protein, conserved                               | 0,4249 | 0,0009709  |
| TcCLB.509757.30  | stress-inducible protein STI1-like, putative                  | 0,4249 | 0,003968   |
| TcCLB.511181.40  | hypothetical protein                                          | 0,4248 | 0,002806   |
| TcCLB.507641.280 | chaperonin HSP60, mitochondrial precursor (HSP60)             | 0,4246 | 0,00153    |
| TcCLB.511541.40  | hypothetical protein, conserved                               | 0,4245 | 0,00009578 |
| TcCLB.504881.40  | hypothetical protein, conserved                               | 0,4244 | 0,00004085 |
| TcCLB.503781.70  | proteasome subunit beta type-5, putative                      | 0,4244 | 0,000106   |
| TcCLB.508413.68  | kinetoplastid membrane protein KMP-11                         | 0,4242 | 0,001544   |
| TcCLB.510849.20  | trans-sialidase (pseudogene), putative                        | 0,4241 | 0,005714   |
| TcCLB.508501.200 | hypothetical protein, conserved                               | 0,4241 | 0,04649    |
| TcCLB.511823.14  | hypothetical protein, conserved                               | 0,424  | 0,04524    |
| TcCLB.510509.30  | hypothetical protein, conserved                               | 0,4238 | 0,0135     |
| TcCLB.505937.29  | dispersed gene family protein 1 (DGF-1), putative             | 0,4237 | 0,15       |
| TcCLB.511809.60  | hypothetical protein, conserved                               | 0,4236 | 7,947E-11  |
| TcCLB.508939.50  | hypothetical protein, conserved                               | 0,4236 | 0,02327    |
| TcCLB.507783.20  | AGP2beta-2, putative                                          | 0,4234 | 6,964E-06  |
| TcCLB.410199.10  | hypothetical protein                                          | 0,4234 | 0,006205   |
| TcCLB.418221.20  | hypothetical protein, conserved                               | 0,4231 | 0,00004401 |
| TcCLB.453917.9   | hypothetical protein, conserved                               | 0,4231 | 0,007001   |
| TcCLB.507047.50  | hypothetical protein, conserved                               | 0,423  | 0,0003002  |
| TcCLB.506717.30  | dispersed gene family protein 1 (DGF-1, pseudogene), put      | 0,423  | 0,009644   |
| TcCLB.511725.150 | exportin 1, putative (CRM1)                                   | 0,4228 | 1,224E-06  |
| TcCLB.511113.9   | hypothetical protein, conserved (fragment)                    | 0,4228 | 0,00006301 |
| TcCLB.506543.40  | hypothetical protein, conserved                               | 0,4228 | 0,002715   |
| TcCLB.509265.60  | retrotransposon hot spot protein (RHS, pseudogene), puta      | 0,4228 | 0,009595   |
| TcCLB.511181.90  | peroxisome targeting signal 1 receptor, putative (PEX5)       | 0,4224 | 0,00005674 |
| TcCLB.508479.320 | hypothetical protein, conserved                               | 0,4224 | 0,03189    |
| TcCLB.509147.21  | hypothetical protein, conserved (pseudogene)                  | 0,4223 | 0,06176    |
| TcCLB.511301.40  | eukaryotic translation initiation factor 4E (eIF4E) interacti | 0,4222 | 0,0007947  |
| TcCLB.507691.50  | retrotransposon hot spot (RHS) protein, putative              | 0,4221 | 0,0007055  |

|                  |                                                           |        |            |
|------------------|-----------------------------------------------------------|--------|------------|
| TcCLB.510965.29  | hypothetical protein, conserved                           | 0,4218 | 0,002938   |
| TcCLB.510055.150 | hypothetical protein, conserved                           | 0,4217 | 2,554E-07  |
| TcCLB.506191.39  | dispersed gene family protein 1 (DGF-1), putative         | 0,4216 | 0,01264    |
| TcCLB.509733.150 | hypothetical protein, conserved                           | 0,4213 | 9,666E-06  |
| TcCLB.510743.10  | ubiquitin-activating enzyme E1, putative                  | 0,4212 | 0,00001428 |
| TcCLB.507671.20  | hypothetical protein, conserved                           | 0,4212 | 0,009757   |
| TcCLB.509871.10  | retrotransposon hot spot protein (RHS, pseudogene), puta  | 0,4211 | 8,094E-06  |
| TcCLB.510165.20  | DNA repair protein, putative                              | 0,4211 | 0,0001399  |
| TcCLB.479517.50  | surface protease GP63, putative                           | 0,4209 | 0,1231     |
| TcCLB.507717.9   | hypothetical protein, conserved                           | 0,4208 | 0,0058     |
| TcCLB.506419.30  | hypothetical protein, conserved                           | 0,4206 | 0,006858   |
| TcCLB.511621.40  | hypothetical protein, conserved                           | 0,4205 | 0,0003071  |
| TcCLB.507761.10  | dispersed gene family protein 1 (DGF-1, pseudogene), put  | 0,4204 | 0,05524    |
| TcCLB.510643.160 | AGP2beta-2, putative                                      | 0,4203 | 5,629E-06  |
| TcCLB.503489.24  | hypothetical protein, conserved                           | 0,42   | 9,567E-07  |
| TcCLB.506999.120 | hypothetical protein, conserved                           | 0,4198 | 0,0001024  |
| TcCLB.506481.30  | hypothetical protein, conserved                           | 0,4198 | 0,0002863  |
| TcCLB.511295.40  | tRNA pseudouridine synthase A-like protein, putative      | 0,4193 | 0,00003301 |
| TcCLB.506537.120 | hypothetical protein, conserved                           | 0,4192 | 0,0719     |
| TcCLB.506977.80  | hypothetical protein, conserved                           | 0,4191 | 1,968E-07  |
| TcCLB.511481.50  | endonuclease III, putative                                | 0,4191 | 0,001863   |
| TcCLB.510731.104 | hypothetical protein, conserved                           | 0,4191 | 0,006663   |
| TcCLB.506447.10  | hypothetical protein                                      | 0,4191 | 0,009235   |
| TcCLB.506025.30  | hypothetical protein, conserved                           | 0,419  | 0,001999   |
| TcCLB.508409.240 | hypothetical protein, conserved                           | 0,4189 | 0,0001605  |
| TcCLB.413977.10  | guide RNA associated protein, GAP1, putative              | 0,4189 | 0,0002226  |
| TcCLB.504427.100 | hypothetical protein, conserved                           | 0,4187 | 0,01041    |
| TcCLB.507485.120 | tuzin                                                     | 0,4187 | 0,01852    |
| TcCLB.507715.80  | ubiquitin-conjugating enzyme, putative                    | 0,4185 | 0,001043   |
| TcCLB.506945.350 | serine/threonine protein kinase, putative                 | 0,4183 | 6,806E-09  |
| TcCLB.509207.150 | kinesin, putative                                         | 0,4182 | 1,322E-08  |
| TcCLB.506775.60  | hypothetical protein, conserved                           | 0,4182 | 9,823E-06  |
| TcCLB.511165.4   | cytoplasmic translation machinery associated protein, put | 0,4181 | 0,04741    |
| TcCLB.503677.10  | phosphomannose isomerase, putative                        | 0,4179 | 0,0001133  |
| TcCLB.508827.40  | acyl-CoA dehydrogenase, putative                          | 0,4175 | 0,008129   |
| TcCLB.509785.40  | retrotransposon hot spot protein (RHS, pseudogene), puta  | 0,4173 | 0,009231   |
| TcCLB.505939.80  | hypothetical protein, conserved                           | 0,4172 | 0,01222    |
| TcCLB.507765.70  | 40S ribosomal protein S21, putative                       | 0,417  | 2,052E-10  |
| TcCLB.511253.10  | kinesin-like protein, putative                            | 0,417  | 0,01051    |
| TcCLB.507485.130 | amastin, putative                                         | 0,4169 | 0,0001032  |
| TcCLB.507677.100 | hypothetical protein, conserved                           | 0,4169 | 0,001892   |
| TcCLB.511821.170 | hypothetical protein, conserved                           | 0,4169 | 0,00228    |
| TcCLB.511277.420 | hypothetical protein, conserved                           | 0,4168 | 2,997E-06  |
| TcCLB.510877.20  | hypothetical protein, conserved                           | 0,4168 | 7,558E-06  |
| TcCLB.503657.9   | hypothetical protein, conserved                           | 0,4168 | 0,0001318  |

|                  |                                                            |        |            |
|------------------|------------------------------------------------------------|--------|------------|
| TcCLB.511693.20  | hypothetical protein, conserved                            | 0,4168 | 0,008982   |
| TcCLB.506569.10  | cysteine peptidase, Clan CA, family C19, putative          | 0,4166 | 0,00005368 |
| TcCLB.511383.40  | hypothetical protein, conserved                            | 0,4166 | 0,0007024  |
| TcCLB.507771.80  | hypothetical protein, conserved                            | 0,4164 | 0,00003524 |
| TcCLB.511039.6   | hypothetical protein, conserved                            | 0,4164 | 0,004158   |
| TcCLB.506297.270 | 60S ribosomal protein L28, putative                        | 0,4162 | 1,215E-08  |
| TcCLB.510575.230 | hypothetical protein, conserved                            | 0,4161 | 0,000257   |
| TcCLB.505071.90  | protein phosphatase 2A, regulatory subunit B, putative     | 0,416  | 0,00003195 |
| TcCLB.510435.50  | AMP deaminase (pseudogene), putative                       | 0,416  | 0,0007013  |
| TcCLB.504887.10  | dispersed gene family protein 1 (DGF-1), putative          | 0,4159 | 0,006231   |
| TcCLB.504069.53  | proteasome subunit alpha type-5, putative                  | 0,4158 | 1,058E-06  |
| TcCLB.507005.60  | structural maintenance of chromosome (SMC) family prot     | 0,4157 | 7,283E-07  |
| TcCLB.509641.10  | hypothetical protein, conserved                            | 0,4155 | 0,01257    |
| TcCLB.445635.10  | receptor-type adenylate cyclase (pseudogene), putative     | 0,415  | 0,0003772  |
| TcCLB.503473.4   | proteasome 26S non-ATPase subunit 9, putative              | 0,415  | 0,05757    |
| TcCLB.511633.40  | dynein light chain, putative                               | 0,4149 | 0,005502   |
| TcCLB.507265.30  | DNA polymerase delta catalytic subunit, putative           | 0,4147 | 0,007247   |
| TcCLB.510763.30  | hypothetical protein, conserved                            | 0,4146 | 0,0237     |
| TcCLB.507729.10  | dispersed gene family protein 1 (DGF-1), putative          | 0,4144 | 0,2776     |
| TcCLB.506735.80  | hypothetical protein, conserved                            | 0,4143 | 0,00001133 |
| TcCLB.407477.40  | hypothetical protein, conserved                            | 0,4143 | 0,00335    |
| TcCLB.507041.30  | hypothetical protein, conserved                            | 0,4142 | 0,0006654  |
| TcCLB.506869.30  | hypothetical protein, conserved                            | 0,4142 | 0,02616    |
| TcCLB.506725.70  | hypothetical protein, conserved                            | 0,4139 | 0,0003312  |
| TcCLB.403985.10  | retrotransposon hot spot (RHS) protein, putative, (fragme  | 0,4137 | 0,0006962  |
| TcCLB.511261.71  | hypothetical protein, conserved (pseudogene)               | 0,4137 | 0,002916   |
| TcCLB.509171.54  | hypothetical protein, conserved                            | 0,4137 | 0,007961   |
| TcCLB.511661.30  | hypothetical protein, conserved                            | 0,4136 | 3,892E-08  |
| TcCLB.509127.90  | hypothetical protein, conserved                            | 0,4136 | 0,00003232 |
| TcCLB.508569.90  | hypothetical protein, conserved                            | 0,4136 | 0,0004093  |
| TcCLB.506945.310 | hypothetical protein, conserved                            | 0,4136 | 0,0004188  |
| TcCLB.509395.80  | hypothetical protein, conserved                            | 0,4135 | 0,0001442  |
| TcCLB.510761.30  | RNA re-capping enzyme, cytoplasmic, putative (Ce1)         | 0,4134 | 0,00001031 |
| TcCLB.508001.90  | hypothetical protein, conserved (pseudogene)               | 0,4134 | 0,07426    |
| TcCLB.509875.90  | retrotransposon hot spot protein (RHS, pseudogene), puta   | 0,4133 | 0,04876    |
| TcCLB.508837.180 | DNA polymerase I alpha catalytic subunit, putative         | 0,4132 | 4,006E-07  |
| TcCLB.508277.140 | phosphomevalonate kinase protein, putative                 | 0,413  | 9,547E-07  |
| TcCLB.507013.30  | hypothetical protein, conserved                            | 0,4128 | 0,01063    |
| TcCLB.511209.40  | hypothetical protein, conserved                            | 0,4126 | 0,005538   |
| TcCLB.510285.100 | eukaryotic translation initiation factor 4 gamma, putative | 0,4124 | 0,00000759 |
| TcCLB.507099.60  | hypothetical protein, conserved                            | 0,4124 | 0,0001222  |
| TcCLB.504147.50  | amino acid transporter (pseudogene), putative              | 0,4123 | 0,002881   |
| TcCLB.508845.5   | retrotransposon hot spot protein (RHS, pseudogene), puta   | 0,4123 | 0,2649     |
| TcCLB.510155.190 | hypothetical protein, conserved                            | 0,4121 | 0,0001119  |
| TcCLB.509111.28  | fucose kinase, putative                                    | 0,4121 | 0,08167    |

|                  |                                                                |        |            |
|------------------|----------------------------------------------------------------|--------|------------|
| TcCLB.506829.10  | hypothetical protein, conserved                                | 0,4118 | 0,00002105 |
| TcCLB.510307.250 | trans-sialidase (pseudogene), putative                         | 0,4118 | 0,003895   |
| TcCLB.508551.39  | hexose transporter, putative                                   | 0,4118 | 0,0166     |
| TcCLB.508355.190 | choline kinase                                                 | 0,4117 | 0,00001542 |
| TcCLB.508881.90  | hypothetical protein, conserved                                | 0,4117 | 0,0002844  |
| TcCLB.504131.60  | hypothetical protein, conserved                                | 0,4114 | 0,0000782  |
| TcCLB.510279.240 | hypothetical protein                                           | 0,4114 | 0,0726     |
| TcCLB.504883.60  | hypothetical protein, conserved                                | 0,411  | 0,00000109 |
| TcCLB.509429.4   | retrotransposon hot spot (RHS) protein, putative (fragmer      | 0,4109 | 3,276E-06  |
| TcCLB.507491.70  | hypothetical protein, conserved (pseudogene)                   | 0,4109 | 9,189E-06  |
| TcCLB.507021.20  | ESAG8-associated protein, putative (PIE8)                      | 0,4108 | 0,1609     |
| TcCLB.504203.4   | hypothetical protein, conserved                                | 0,4106 | 0,0008535  |
| TcCLB.511627.150 | beta-ketoacyl-ACP reductase                                    | 0,4104 | 0,0005494  |
| TcCLB.509437.160 | trans-sialidase, Group IV, putative                            | 0,4104 | 0,00124    |
| TcCLB.506195.160 | hypothetical protein, conserved                                | 0,4104 | 0,001339   |
| TcCLB.506525.90  | hypothetical protein, conserved                                | 0,4102 | 0,0004467  |
| TcCLB.509461.80  | hypothetical protein, conserved                                | 0,4098 | 0,0001977  |
| TcCLB.511661.120 | protein kinase, putative                                       | 0,4097 | 1,268E-06  |
| TcCLB.508741.200 | hypothetical protein, conserved                                | 0,4096 | 2,659E-06  |
| TcCLB.506191.20  | retrotransposon hot spot protein (RHS, pseudogene), puta       | 0,4096 | 0,004052   |
| TcCLB.507603.150 | dolichyl-P-Man:GDP-Man5GlcNAc2-PP-dolichyl alpha-1,2- $\alpha$ | 0,4094 | 0,0001262  |
| TcCLB.507083.80  | hypothetical protein, conserved                                | 0,4094 | 0,00458    |
| TcCLB.511415.50  | retrotransposon hot spot protein (RHS, pseudogene), puta       | 0,4092 | 0,02372    |
| TcCLB.511827.110 | trans-sialidase, Group II, putative                            | 0,4091 | 0,0002438  |
| TcCLB.511821.120 | hypothetical protein, conserved                                | 0,409  | 0,0001558  |
| TcCLB.504137.60  | beta adaptin, putative                                         | 0,409  | 0,0003721  |
| TcCLB.506797.60  | hypothetical protein, conserved                                | 0,409  | 0,0005461  |
| TcCLB.507211.30  | hypothetical protein, conserved                                | 0,4089 | 0,003172   |
| TcCLB.510155.120 | ubiquitin activating enzyme, putative                          | 0,4087 | 0,00005948 |
| TcCLB.508401.50  | hypothetical protein, conserved (pseudogene)                   | 0,4087 | 0,0001922  |
| TcCLB.511745.40  | hypothetical protein, conserved                                | 0,4087 | 0,0003259  |
| TcCLB.510747.100 | hypothetical protein, conserved                                | 0,4086 | 0,000737   |
| TcCLB.510737.50  | hypothetical protein, conserved                                | 0,4085 | 1,806E-06  |
| TcCLB.507089.50  | ATP-dependent DEAD/H RNA helicase, putative                    | 0,4083 | 0,00009524 |
| TcCLB.504213.10  | hypothetical protein, conserved                                | 0,4082 | 0,009247   |
| TcCLB.503643.10  | KU70 protein, putative                                         | 0,4081 | 0,000281   |
| TcCLB.509215.19  | hypothetical protein, conserved                                | 0,408  | 0,003672   |
| TcCLB.508543.129 | hypothetical protein, conserved                                | 0,4079 | 0,0002191  |
| TcCLB.506265.40  | hypothetical protein, conserved                                | 0,4079 | 0,03193    |
| TcCLB.511587.40  | hypothetical protein, conserved (pseudogene)                   | 0,4078 | 3,924E-06  |
| TcCLB.508325.150 | glycine dehydrogenase (pseudogene), putative                   | 0,4078 | 9,159E-06  |
| TcCLB.508273.10  | AMP deaminase, putative                                        | 0,4078 | 0,00006659 |
| TcCLB.511821.20  | hypothetical protein, conserved                                | 0,4078 | 0,001326   |
| TcCLB.506855.350 | hypothetical protein                                           | 0,4078 | 0,003796   |
| TcCLB.508221.20  | trans-sialidase (pseudogene), putative                         | 0,4078 | 0,05887    |

|                   |                                                              |        |            |
|-------------------|--------------------------------------------------------------|--------|------------|
| TcCLB.511391.24   | dispersed gene family protein 1 (DGF-1, pseudogene), put     | 0,4076 | 0,006233   |
| TcCLB.507951.114  | high mobility group protein, putative                        | 0,4074 | 0,0002574  |
| TcCLB.424123.20   | paraflagellar rod component, putative (PFC16)                | 0,4074 | 0,01486    |
| TcCLB.511867.110  | flap endonuclease-1 (FEN-1), putative                        | 0,4073 | 0,0001408  |
| TcCLB.504051.49   | hypothetical protein, conserved                              | 0,4073 | 0,01046    |
| TcCLB.510761.76   | UDP-glucuronosyl and UDP-glucosyl transferase, putative      | 0,4072 | 0,001521   |
| TcCLB.503685.20   | hypothetical protein, conserved                              | 0,4072 | 0,002686   |
| TcCLB.482425.10   | retrotransposon hot spot (RHS) protein, putative             | 0,4071 | 0,1796     |
| TcCLB.506297.94   | 60S ribosomal protein L24, putative                          | 0,4067 | 0,0003515  |
| TcCLB.508153.1020 | hypothetical protein, conserved                              | 0,4065 | 0,002463   |
| TcCLB.507711.150  | Ubiquitin-like modifier-activating enzyme ATG7, putative     | 0,4064 | 0,0004542  |
| TcCLB.510819.30   | hypothetical protein                                         | 0,4064 | 0,00418    |
| TcCLB.511807.70   | heat shock protein DNAJ, putative                            | 0,4063 | 0,00005779 |
| TcCLB.511867.150  | hypothetical protein, conserved                              | 0,4063 | 0,004026   |
| TcCLB.506797.90   | short chain dehydrogenase/reductase, putative                | 0,4061 | 0,0002152  |
| TcCLB.507603.20   | translation initiation factor EIF-2b alpha subunit, putative | 0,4061 | 0,007629   |
| TcCLB.508711.10   | Tetratricopeptide-like helical domain containing protein (I  | 0,406  | 6,667E-09  |
| TcCLB.404001.20   | hypothetical protein, conserved                              | 0,406  | 0,00001343 |
| TcCLB.507517.10   | hypothetical protein, conserved                              | 0,4058 | 0,00008889 |
| TcCLB.508153.710  | hypothetical protein                                         | 0,4057 | 0,0008229  |
| TcCLB.508211.40   | hypothetical protein, conserved                              | 0,4056 | 0,0000508  |
| TcCLB.507609.80   | hypothetical protein, conserved                              | 0,4055 | 0,02854    |
| TcCLB.506831.66   | hypothetical protein, conserved                              | 0,4054 | 0,02272    |
| TcCLB.507053.10   | 50S ribosomal protein L7Ae, putative                         | 0,4053 | 0,00002405 |
| TcCLB.506925.140  | DNA repair protein, putative                                 | 0,4053 | 0,00003994 |
| TcCLB.506895.30   | hypothetical protein, conserved                              | 0,4053 | 0,004767   |
| TcCLB.510659.250  | phospholipase A1, putative                                   | 0,4052 | 0,0001332  |
| TcCLB.503755.20   | hypothetical protein                                         | 0,405  | 0,0001097  |
| TcCLB.506471.19   | hypothetical protein, conserved                              | 0,405  | 0,02632    |
| TcCLB.511827.80   | hypothetical protein, conserved                              | 0,4046 | 0,001499   |
| TcCLB.422955.10   | hypothetical protein, conserved (pseudogene)                 | 0,4044 | 0,0008873  |
| TcCLB.503903.30   | hypothetical protein                                         | 0,4044 | 0,0009136  |
| TcCLB.510345.20   | hypothetical protein                                         | 0,4043 | 0,01139    |
| TcCLB.511827.40   | hypothetical protein, conserved                              | 0,4042 | 0,0001893  |
| TcCLB.508693.199  | hypothetical protein, conserved                              | 0,4042 | 0,0003745  |
| TcCLB.511321.20   | hypothetical protein, conserved                              | 0,404  | 3,595E-06  |
| TcCLB.509695.90   | intraflagellar transport protein 172, putative (IFT172)      | 0,4038 | 0,00008332 |
| TcCLB.418185.46   | N-acetyltransferase complex ARD1 subunit (pseudogene),       | 0,4037 | 0,1301     |
| TcCLB.510465.10   | dispersed gene family protein 1 (DGF-1), putative            | 0,4037 | 0,335      |
| TcCLB.509455.70   | DNA polymerase delta subunit 2, putative                     | 0,4035 | 0,00009315 |
| TcCLB.507397.9    | dispersed gene family protein 1 (DGF-1), putative            | 0,4035 | 0,5342     |
| TcCLB.507951.70   | hypothetical protein                                         | 0,4034 | 0,007369   |
| TcCLB.503955.40   | trans-sialidase, Group II, putative                          | 0,403  | 0,0000389  |
| TcCLB.507923.40   | hypothetical protein, conserved                              | 0,4028 | 0,00134    |
| TcCLB.506855.280  | DNA repair and recombination helicase protein PIF6, puta     | 0,4027 | 0,00007117 |

|                  |                                                           |        |            |
|------------------|-----------------------------------------------------------|--------|------------|
| TcCLB.506471.110 | retrotransposon hot spot protein (RHS, pseudogene), puta  | 0,4027 | 0,0003384  |
| TcCLB.509175.18  | hypothetical protein, conserved                           | 0,4027 | 0,0122     |
| TcCLB.504839.50  | nucleosome assembly protein-like protein, putative        | 0,4026 | 0,00001842 |
| TcCLB.511045.20  | hypothetical protein, conserved                           | 0,4025 | 0,01123    |
| TcCLB.511923.130 | hypothetical protein, conserved                           | 0,4021 | 0,0003871  |
| TcCLB.510187.60  | glyceraldehyde 3-phosphate dehydrogenase, cytosolic, put  | 0,402  | 0,002259   |
| TcCLB.509669.70  | hypothetical protein, conserved                           | 0,4019 | 5,881E-08  |
| TcCLB.509485.70  | retrotransposon hot spot protein (RHS, pseudogene), puta  | 0,4019 | 0,003162   |
| TcCLB.410961.10  | phosphatidylinositol kinase related protein, putative     | 0,4019 | 0,1205     |
| TcCLB.457101.10  | hypothetical protein, conserved                           | 0,4018 | 0,00002202 |
| TcCLB.506227.30  | hypothetical protein, conserved                           | 0,4017 | 0,0001147  |
| TcCLB.508445.10  | rab11B GTPase, putative                                   | 0,4017 | 0,0003069  |
| TcCLB.508837.100 | hypothetical protein, conserved                           | 0,4016 | 0,009227   |
| TcCLB.503847.20  | myosin heavy chain, putative                              | 0,4012 | 0,00004317 |
| TcCLB.511283.320 | hypothetical protein, conserved                           | 0,4012 | 0,004043   |
| TcCLB.504067.10  | dispersed gene family protein 1 (DGF-1), putative         | 0,4012 | 0,214      |
| TcCLB.509925.70  | dispersed gene family protein 1 (DGF-1), putative         | 0,4011 | 0,02429    |
| TcCLB.510431.245 | hypothetical protein, conserved (pseudogene)              | 0,401  | 0,009725   |
| TcCLB.510661.19  | ubiquitin-activating enzyme E1, putative (fragment)       | 0,4008 | 0,001831   |
| TcCLB.508897.100 | dynein light chain, putative                              | 0,4006 | 0,003203   |
| TcCLB.509643.40  | hypothetical protein, conserved                           | 0,4006 | 0,005157   |
| TcCLB.511727.40  | ubiquitin-conjugating enzyme E2, putative                 | 0,4005 | 7,672E-06  |
| TcCLB.508921.20  | hypothetical protein, conserved                           | 0,4004 | 0,009536   |
| TcCLB.511001.220 | hypothetical protein, conserved                           | 0,4003 | 0,00007006 |
| TcCLB.510087.90  | hypothetical protein, conserved                           | 0,4003 | 0,02313    |
| TcCLB.511557.10  | serine peptidase, clan SC, family S9A-like protein (OPB)  | 0,4    | 5,02E-07   |
| TcCLB.508173.210 | hypothetical protein, conserved                           | 0,4    | 0,00005273 |
| TcCLB.508089.71  | hypothetical protein                                      | 0,3999 | 0,01557    |
| TcCLB.506529.440 | hypothetical protein, conserved                           | 0,3997 | 0,0005172  |
| TcCLB.507873.40  | hypothetical protein, conserved                           | 0,3997 | 0,01159    |
| TcCLB.511301.100 | hypothetical protein, conserved                           | 0,3996 | 0,0005651  |
| TcCLB.511367.190 | hypothetical protein, conserved                           | 0,3995 | 0,0000811  |
| TcCLB.511131.70  | hypothetical protein, conserved                           | 0,3995 | 0,002336   |
| TcCLB.507711.270 | hypothetical protein, conserved                           | 0,3994 | 0,004723   |
| TcCLB.509103.30  | hypothetical protein, conserved                           | 0,3994 | 0,03588    |
| TcCLB.504741.160 | ribosomal protein L11, putative                           | 0,3992 | 0,002786   |
| TcCLB.503527.50  | hypothetical protein, conserved                           | 0,3992 | 0,004532   |
| TcCLB.504149.210 | N-acetyltransferase complex ARD1 subunit (pseudogene),    | 0,399  | 0,06526    |
| TcCLB.508837.34  | dispersed gene family protein 1 (DGF-1), putative (fragmε | 0,3988 | 0,004861   |
| TcCLB.508523.10  | retrotransposon hot spot protein (RHS, pseudogene), puta  | 0,3986 | 0,007058   |
| TcCLB.510305.79  | hypothetical protein, conserved                           | 0,3984 | 8,329E-07  |
| TcCLB.506843.80  | trans-sialidase (pseudogene), putative                    | 0,3983 | 0,03068    |
| TcCLB.408485.20  | retrotransposon hot spot protein (RHS, pseudogene), puta  | 0,3983 | 0,04192    |
| TcCLB.509373.21  | elongation factor 1-gamma (EF-1-gamma, pseudogene),       | 0,3983 | 0,1464     |
| TcCLB.510299.40  | hypothetical protein, conserved                           | 0,3982 | 0,00009878 |

|                  |                                                           |        |            |
|------------------|-----------------------------------------------------------|--------|------------|
| TcCLB.506789.330 | hypothetical protein, conserved                           | 0,3982 | 0,0008516  |
| TcCLB.506857.10  | glycogen synthase kinase-3 alpha, putative                | 0,3982 | 0,0027     |
| TcCLB.506127.40  | hypothetical protein, conserved                           | 0,398  | 0,002858   |
| TcCLB.508897.20  | signal recognition particle protein, putative             | 0,3979 | 0,00000092 |
| TcCLB.507011.170 | hypothetical protein, conserved                           | 0,3978 | 0,0004097  |
| TcCLB.509261.20  | aminopeptidase, putative                                  | 0,3973 | 0,00001643 |
| TcCLB.507213.10  | hypothetical protein, conserved                           | 0,3973 | 0,00001672 |
| TcCLB.511751.60  | hypothetical protein, conserved                           | 0,397  | 0,00003602 |
| TcCLB.509053.130 | DnaJ chaperone protein, putative                          | 0,397  | 0,004563   |
| TcCLB.506419.60  | nucleoporin (NUP54/57), putative                          | 0,3969 | 0,0000794  |
| TcCLB.510153.10  | hypothetical protein, conserved                           | 0,3964 | 0,0002786  |
| TcCLB.508805.30  | choline/ethanolamine kinase (pseudogene), putative        | 0,3964 | 0,0008609  |
| TcCLB.510187.500 | serine/threonine protein phosphatase 2B catalytic subunit | 0,3964 | 0,0008897  |
| TcCLB.506977.90  | proteasome regulatory non-ATP-ase subunit 5, putative (F  | 0,3962 | 7,135E-09  |
| TcCLB.511807.290 | hypothetical protein, conserved                           | 0,3959 | 0,00003543 |
| TcCLB.509809.20  | chaperone DNAJ protein, putative                          | 0,3959 | 0,000945   |
| TcCLB.510253.10  | hypothetical protein, conserved                           | 0,3959 | 0,002763   |
| TcCLB.505997.10  | retrotransposon hot spot (RHS) protein, putative          | 0,3957 | 0,005753   |
| TcCLB.506513.60  | ADP-ribosylation factor, putative (ARL-1)                 | 0,3956 | 0,001879   |
| TcCLB.510765.70  | 60S ribosomal protein L5, putative                        | 0,3955 | 0,0005731  |
| TcCLB.510579.20  | Peptide deformylase 2, putative (PDF2)                    | 0,3954 | 0,0003815  |
| TcCLB.506563.100 | hypothetical protein, conserved                           | 0,3951 | 0,00005558 |
| TcCLB.509453.50  | serine/threonine-protein phosphatase                      | 0,3951 | 0,003582   |
| TcCLB.508231.70  | hypothetical protein, conserved                           | 0,3951 | 0,00521    |
| TcCLB.508461.190 | hypothetical protein, conserved                           | 0,3948 | 0,0000276  |
| TcCLB.506529.546 | hypothetical protein                                      | 0,3948 | 0,2751     |
| TcCLB.506885.440 | hypothetical protein, conserved                           | 0,3947 | 0,0001046  |
| TcCLB.409139.9   | trans-sialidase, putative                                 | 0,3947 | 0,3718     |
| TcCLB.511127.330 | kinetoplastid kinetochore protein 19, putative (kkt19)    | 0,3946 | 0,04179    |
| TcCLB.508239.40  | palmitoyl acyltransferase 8, putative                     | 0,3943 | 0,003657   |
| TcCLB.509065.33  | hypothetical protein, conserved                           | 0,3943 | 0,01207    |
| TcCLB.508355.431 | chaperonin containing t-complex protein, putative (fragm  | 0,3941 | 0,2601     |
| TcCLB.511693.60  | hypothetical protein, conserved                           | 0,394  | 0,02371    |
| TcCLB.508547.201 | ubiquitin-protein ligase, putative (fragment)             | 0,394  | 0,07016    |
| TcCLB.510661.60  | glycerol kinase, glycosomal, putative                     | 0,3938 | 0,0000706  |
| TcCLB.509105.94  | hypothetical protein, conserved                           | 0,3938 | 0,02551    |
| TcCLB.507213.60  | retrotransposon hot spot protein (RHS, pseudogene), puta  | 0,3934 | 0,002402   |
| TcCLB.508181.60  | hypothetical protein, conserved                           | 0,3933 | 6,519E-06  |
| TcCLB.508221.502 | hypothetical protein, conserved (pseudogene)              | 0,3933 | 0,1093     |
| TcCLB.506743.160 | protein kinase, putative                                  | 0,3929 | 0,0001273  |
| TcCLB.506717.60  | retrotransposon hot spot protein (RHS, pseudogene), puta  | 0,3928 | 0,0001412  |
| TcCLB.507907.30  | retrotransposon hot spot (RHS) protein, putative          | 0,3928 | 0,1015     |
| TcCLB.413293.9   | trans-sialidase, putative (fragment)                      | 0,3928 | 0,2055     |
| TcCLB.507499.60  | retrotransposon hot spot protein (RHS, pseudogene), puta  | 0,3926 | 2,814E-06  |
| TcCLB.509729.10  | hypothetical protein, conserved                           | 0,3925 | 0,000128   |



|                  |                                                              |        |            |
|------------------|--------------------------------------------------------------|--------|------------|
| TcCLB.510091.100 | hypothetical protein, conserved                              | 0,3925 | 0,007683   |
| TcCLB.508179.50  | hypothetical protein, conserved                              | 0,3924 | 0,001472   |
| TcCLB.508413.76  | kinetoplastid membrane protein KMP-11                        | 0,3924 | 0,005112   |
| TcCLB.447255.20  | Sir2-related protein 3, putative (SIR2rp3)                   | 0,3923 | 0,004863   |
| TcCLB.508909.300 | hypothetical protein, conserved                              | 0,3922 | 0,000649   |
| TcCLB.506025.40  | hypothetical protein, conserved                              | 0,3919 | 0,00004528 |
| TcCLB.506851.20  | choline dehydrogenase, putative                              | 0,3918 | 0,0000176  |
| TcCLB.506605.180 | hypothetical protein, conserved                              | 0,3918 | 0,0006416  |
| TcCLB.509229.120 | hypothetical protein, conserved                              | 0,3917 | 0,003204   |
| TcCLB.508173.170 | protein kinase, putative                                     | 0,3914 | 0,00002552 |
| TcCLB.506401.304 | mitochondrial carrier protein, putative                      | 0,3914 | 0,0001277  |
| TcCLB.506835.110 | protein mkt1, putative                                       | 0,3912 | 3,365E-06  |
| TcCLB.506573.70  | hypothetical protein, conserved                              | 0,3912 | 0,01105    |
| TcCLB.506457.60  | 2-aminoethylphosphonate:pyruvateaminotransferase- like       | 0,3911 | 0,001634   |
| TcCLB.511239.20  | hypothetical protein, conserved                              | 0,391  | 0,00132    |
| TcCLB.506795.70  | hypothetical protein, conserved                              | 0,391  | 0,02068    |
| TcCLB.509911.110 | hypothetical protein, conserved                              | 0,3909 | 0,004235   |
| TcCLB.507041.40  | hypothetical protein, conserved                              | 0,3907 | 0,00001449 |
| TcCLB.504175.20  | hypothetical protein, conserved                              | 0,3906 | 0,01265    |
| TcCLB.507023.210 | hypothetical protein, conserved                              | 0,3906 | 0,03461    |
| TcCLB.509643.90  | serine peptidase, putative                                   | 0,3905 | 0,0004084  |
| TcCLB.507949.50  | SSU ribosomal protein, mitochondrial, putative (MRPS15)      | 0,3904 | 0,0003181  |
| TcCLB.506999.20  | hypothetical protein, conserved                              | 0,3903 | 0,0000194  |
| TcCLB.506869.50  | calcineurin B subunit, putative (CNB)                        | 0,3902 | 0,01878    |
| TcCLB.506979.30  | hypothetical protein                                         | 0,3902 | 0,2005     |
| TcCLB.511071.10  | hypothetical protein, conserved                              | 0,3901 | 0,0001509  |
| TcCLB.506883.30  | ribosome-interacting GTPase 2, putative                      | 0,3901 | 0,0003019  |
| TcCLB.508973.30  | NUDIX family hydrolase, putative                             | 0,3901 | 0,004158   |
| TcCLB.507875.150 | damage-specific DNA binding protein (pseudogene), putative   | 0,3899 | 0,009616   |
| TcCLB.510571.20  | leucine-rich repeat protein 1 (LRRP1), putative              | 0,3899 | 0,01842    |
| TcCLB.509047.20  | hypothetical protein                                         | 0,3897 | 0,001245   |
| TcCLB.511821.30  | Mu-adaptin 1, putative                                       | 0,3896 | 0,0006178  |
| TcCLB.509393.40  | hypothetical protein                                         | 0,3895 | 0,00002727 |
| TcCLB.511695.10  | hypothetical protein                                         | 0,3895 | 0,1169     |
| TcCLB.503877.19  | hypothetical protein, conserved                              | 0,3894 | 0,03005    |
| TcCLB.504071.90  | glycosyltransferase family 28 protein, putative              | 0,3889 | 0,000249   |
| TcCLB.508501.210 | hypothetical protein, conserved                              | 0,3889 | 0,00228    |
| TcCLB.510903.80  | retrotransposon hot spot protein (RHS, pseudogene), putative | 0,3887 | 4,291E-06  |
| TcCLB.506473.6   | hypothetical protein, conserved                              | 0,3882 | 0,0005835  |
| TcCLB.510953.40  | hypothetical protein, conserved                              | 0,3882 | 0,00213    |
| TcCLB.506303.20  | cell division cycle protein 45 (CDC45), putative             | 0,3881 | 0,001724   |
| TcCLB.506305.5   | hypothetical protein, conserved                              | 0,3881 | 0,009099   |
| TcCLB.506925.420 | hypothetical protein, conserved                              | 0,3879 | 0,007255   |
| TcCLB.508231.190 | ABC transporter, putative                                    | 0,3878 | 0,0002859  |
| TcCLB.510599.14  | acetyl-CoA carboxylase (fragment)                            | 0,3872 | 9,493E-06  |

|                  |                                                                 |        |            |
|------------------|-----------------------------------------------------------------|--------|------------|
| TcCLB.506691.80  | hypothetical protein, conserved                                 | 0,3872 | 0,0002193  |
| TcCLB.506515.10  | FG-GAP repeat protein, putative                                 | 0,3872 | 0,0002859  |
| TcCLB.510947.30  | hypothetical protein, conserved                                 | 0,3872 | 0,01108    |
| TcCLB.510737.110 | replication factor C, subunit 3, putative                       | 0,3871 | 0,00127    |
| TcCLB.508515.40  | protein kinase, putative                                        | 0,3871 | 0,02242    |
| TcCLB.506337.210 | signal recognition particle receptor like protein, putative     | 0,3869 | 0,00009675 |
| TcCLB.509391.20  | flagellar calcium-binding protein, putative                     | 0,3869 | 0,4988     |
| TcCLB.418221.10  | hypothetical protein, conserved                                 | 0,3868 | 0,00001537 |
| TcCLB.508173.180 | nuclear transport factor (MTR2)                                 | 0,3867 | 8,307E-06  |
| TcCLB.505193.10  | serine/threonine protein phosphatase-like protein, putative     | 0,3867 | 0,002106   |
| TcCLB.511487.90  | trans-sialidase, Group V, putative                              | 0,3867 | 0,1716     |
| TcCLB.507513.30  | hypothetical protein, conserved                                 | 0,3866 | 0,05422    |
| TcCLB.506435.20  | hypothetical protein, conserved                                 | 0,3863 | 9,828E-06  |
| TcCLB.510691.10  | 1,2-Dihydroxy-3-keto-5-methylthiopentene dioxygenase, putative  | 0,3863 | 0,001667   |
| TcCLB.509161.135 | hypothetical protein, conserved                                 | 0,3861 | 0,005294   |
| TcCLB.510647.30  | tryptophanyl-tRNA synthetase, putative                          | 0,386  | 0,0001979  |
| TcCLB.508851.100 | cyclophilin-like protein, putative                              | 0,386  | 0,02251    |
| TcCLB.507201.9   | dispersed gene family protein 1 (DGF-1), putative               | 0,3859 | 0,02166    |
| TcCLB.510381.40  | hypothetical protein, conserved                                 | 0,3858 | 0,0002278  |
| TcCLB.510565.125 | hypothetical protein, conserved                                 | 0,3856 | 0,05547    |
| TcCLB.510737.100 | hypothetical protein, conserved                                 | 0,3855 | 0,00003783 |
| TcCLB.504147.90  | hypothetical protein, conserved                                 | 0,3854 | 0,001251   |
| TcCLB.505963.9   | dispersed gene family protein 1 (DGF-1), putative (fragment)    | 0,3854 | 0,08955    |
| TcCLB.511807.3   | N-acetyltransferase complex ARD1 subunit (pseudogene), putative | 0,3848 | 0,0372     |
| TcCLB.510439.50  | hypothetical protein, conserved                                 | 0,3843 | 0,0001727  |
| TcCLB.506321.300 | hypothetical protein, conserved                                 | 0,3843 | 0,0004239  |
| TcCLB.503713.10  | hypothetical protein, conserved                                 | 0,3843 | 0,009555   |
| TcCLB.511171.25  | hypothetical protein, conserved (pseudogene)                    | 0,384  | 0,03768    |
| TcCLB.510187.551 | chaperonin HSP60, mitochondrial precursor, putative (fragment)  | 0,3837 | 0,003874   |
| TcCLB.503831.20  | oxidoreductase, putative                                        | 0,3837 | 0,004329   |
| TcCLB.508173.120 | trans-sialidase, Group I, putative                              | 0,3836 | 3,103E-06  |
| TcCLB.510515.110 | hypothetical protein, conserved                                 | 0,3833 | 0,0001929  |
| TcCLB.511249.50  | hypothetical protein, conserved                                 | 0,3832 | 0,0003865  |
| TcCLB.510121.110 | hypothetical protein, conserved                                 | 0,383  | 0,00003044 |
| TcCLB.511425.40  | hypothetical protein, conserved                                 | 0,383  | 0,001141   |
| TcCLB.507709.80  | hypothetical protein, conserved                                 | 0,383  | 0,002051   |
| TcCLB.508023.150 | trans-sialidase (pseudogene), putative                          | 0,3829 | 0,001063   |
| TcCLB.511589.220 | hypothetical protein, conserved                                 | 0,3829 | 0,007848   |
| TcCLB.507485.34  | DNA-directed RNA polymerase III subunit, putative               | 0,3829 | 0,3858     |
| TcCLB.506943.100 | hypothetical protein, conserved                                 | 0,3828 | 6,624E-06  |
| TcCLB.506885.80  | hypothetical protein                                            | 0,3827 | 0,0002815  |
| TcCLB.508839.20  | hypothetical protein, conserved                                 | 0,3827 | 0,0007995  |
| TcCLB.510655.90  | Importin 1 (IMP1)                                               | 0,3826 | 5,375E-08  |
| TcCLB.509747.110 | hypothetical protein, conserved                                 | 0,3824 | 0,0008775  |
| TcCLB.508871.160 | hypothetical protein                                            | 0,3824 | 0,3911     |

|                  |                                                           |        |            |
|------------------|-----------------------------------------------------------|--------|------------|
| TcCLB.506831.60  | hypothetical protein, conserved                           | 0,3823 | 0,001023   |
| TcCLB.407335.9   | phosphatidylserine decarboxylase, putative                | 0,3823 | 0,05101    |
| TcCLB.509341.20  | hypothetical protein, conserved                           | 0,3822 | 3,076E-06  |
| TcCLB.507997.54  | Alpha/beta hydrolase domain-containing protein            | 0,3822 | 0,0008811  |
| TcCLB.505965.60  | hypothetical protein, conserved                           | 0,382  | 0,01009    |
| TcCLB.507519.190 | protein kinase (pseudogene), putative                     | 0,3819 | 0,1779     |
| TcCLB.507089.200 | chloride channel protein, putative                        | 0,3818 | 0,00001907 |
| TcCLB.511127.320 | kinetoplastid kinetochore protein 10, putative (kkt10)    | 0,3818 | 0,004507   |
| TcCLB.510315.30  | hypothetical protein, conserved                           | 0,3818 | 0,007651   |
| TcCLB.507967.30  | hypothetical protein, conserved (fragment)                | 0,3815 | 0,006475   |
| TcCLB.504015.21  | elongation factor 1-gamma (EF-1-gamma, pseudogene),       | 0,3807 | 0,304      |
| TcCLB.506661.60  | hypothetical protein, conserved                           | 0,3806 | 0,001451   |
| TcCLB.503925.80  | CDP-diacylglycerol--inositol 3-phosphatidyltransferase    | 0,3806 | 0,008292   |
| TcCLB.510661.279 | hypothetical protein, conserved                           | 0,3806 | 0,009719   |
| TcCLB.508805.110 | hypothetical protein                                      | 0,3806 | 0,1651     |
| TcCLB.506413.70  | hypothetical protein, conserved                           | 0,3804 | 0,001142   |
| TcCLB.506009.90  | hypothetical protein, conserved                           | 0,3799 | 0,0001887  |
| TcCLB.507027.70  | hypothetical protein, conserved                           | 0,3798 | 0,0003972  |
| TcCLB.504427.130 | 5'-3' exoribonuclease C, putative (XRNC)                  | 0,3798 | 0,000607   |
| TcCLB.508273.40  | hypothetical protein, conserved                           | 0,3798 | 0,001066   |
| TcCLB.429185.20  | trans-sialidase (pseudogene), putative                    | 0,3798 | 0,282      |
| TcCLB.511429.30  | conserved protein, unknown function                       | 0,3797 | 0,00002859 |
| TcCLB.509599.120 | hypothetical protein, conserved                           | 0,3797 | 0,004022   |
| TcCLB.510031.20  | NADH-ubiquinone oxidoreductase complex I subunit, puta    | 0,3795 | 0,007115   |
| TcCLB.510493.20  | hypothetical protein, conserved                           | 0,3795 | 0,02651    |
| TcCLB.508569.120 | hypothetical protein, conserved                           | 0,3792 | 0,00005    |
| TcCLB.510947.50  | cyclophilin, putative (CYP)                               | 0,3792 | 0,005502   |
| TcCLB.506425.120 | eRF1 methyltransferase catalytic subunit, putative        | 0,3789 | 0,03186    |
| TcCLB.506789.220 | hypothetical protein, conserved                           | 0,3788 | 0,0002295  |
| TcCLB.507609.20  | hypothetical protein, conserved                           | 0,3788 | 0,04623    |
| TcCLB.508529.10  | retrotransposon hot spot (RHS) protein, putative, (fragme | 0,3787 | 0,004159   |
| TcCLB.511211.80  | hypothetical protein, conserved                           | 0,3786 | 0,004585   |
| TcCLB.510667.80  | hypothetical protein, conserved                           | 0,3786 | 0,006667   |
| TcCLB.510533.180 | microtubule-associated protein 1A/1B, light chain 3, puta | 0,3785 | 0,05618    |
| TcCLB.503935.4   | hypothetical protein, conserved (pseudogene)              | 0,3784 | 0,02574    |
| TcCLB.506583.10  | U2 small nuclear ribonucleoprotein 16.5K, putative        | 0,3783 | 0,006768   |
| TcCLB.506247.320 | methyltransferase, putative                               | 0,3781 | 0,0001004  |
| TcCLB.510359.34  | hypothetical protein, conserved                           | 0,378  | 0,01276    |
| TcCLB.511807.10  | hypothetical protein, conserved (pseudogene)              | 0,3777 | 7,288E-06  |
| TcCLB.507167.140 | trans-sialidase (pseudogene), putative                    | 0,3776 | 0,1806     |
| TcCLB.508461.400 | nucleoside diphosphate kinase (NDPK2)                     | 0,3775 | 0,000809   |
| TcCLB.509205.70  | hypothetical protein, conserved                           | 0,3774 | 0,002056   |
| TcCLB.508121.30  | trans-sialidase (pseudogene), putative                    | 0,3774 | 0,01394    |
| TcCLB.508857.110 | hypothetical protein, conserved                           | 0,3774 | 0,01833    |
| TcCLB.510691.30  | hypothetical protein, conserved                           | 0,3773 | 0,0004686  |

|                  |                                                          |        |            |
|------------------|----------------------------------------------------------|--------|------------|
| TcCLB.511239.30  | hypothetical protein, conserved                          | 0,3771 | 0,01565    |
| TcCLB.510611.79  | Present in the outer mitochondrial membrane proteome     | 0,3769 | 0,01175    |
| TcCLB.511593.51  | elongation factor 1-gamma (EF-1-gamma, pseudogene),      | 0,3769 | 0,0733     |
| TcCLB.510655.30  | helicase, putative                                       | 0,3764 | 1,595E-06  |
| TcCLB.506945.270 | cyclin, putative                                         | 0,3763 | 0,0006055  |
| TcCLB.510943.90  | hypothetical protein, conserved                          | 0,3763 | 0,03534    |
| TcCLB.510941.6   | hypothetical protein, conserved                          | 0,376  | 0,0005668  |
| TcCLB.509717.30  | hypothetical protein, conserved                          | 0,376  | 0,0007451  |
| TcCLB.510437.10  | dynein heavy chain, putative                             | 0,376  | 0,004548   |
| TcCLB.508259.20  | dispersed gene family protein 1 (DGF-1, pseudogene), put | 0,376  | 0,2001     |
| TcCLB.508717.36  | selenophosphate synthetase, putative                     | 0,3756 | 0,0002862  |
| TcCLB.507625.70  | hypothetical protein, conserved                          | 0,3753 | 0,0001348  |
| TcCLB.504867.120 | hypothetical protein                                     | 0,3749 | 0,00004237 |
| TcCLB.504147.260 | hypothetical protein, conserved                          | 0,3749 | 0,0005096  |
| TcCLB.503395.20  | hypothetical protein, conserved                          | 0,3749 | 0,0179     |
| TcCLB.511545.60  | hypothetical protein                                     | 0,3749 | 0,06004    |
| TcCLB.508163.105 | elongation factor 1-gamma (EF-1-gamma, pseudogene),      | 0,3748 | 0,361      |
| TcCLB.503839.5   | chloride channel protein, putative                       | 0,3746 | 0,02785    |
| TcCLB.507949.69  | DNA-directed RNA polymerase 2, RPB12 subunit, putative   | 0,3744 | 0,003799   |
| TcCLB.506959.90  | hypothetical protein, conserved                          | 0,374  | 1,509E-06  |
| TcCLB.508307.50  | hypothetical protein, conserved                          | 0,3738 | 0,0002853  |
| TcCLB.508479.120 | pumilio/PUF RNA binding protein 8, putative (PUF8)       | 0,3737 | 5,282E-06  |
| TcCLB.509717.9   | hypothetical protein (pseudogene)                        | 0,3737 | 0,09823    |
| TcCLB.506775.30  | tubulin-tyrosine ligase-like protein, putative           | 0,3736 | 0,00009692 |
| TcCLB.511829.5   | trans-sialidase (pseudogene), putative                   | 0,3736 | 0,009684   |
| TcCLB.509669.75  | hypothetical protein                                     | 0,3736 | 0,01467    |
| TcCLB.511369.5   | elongation factor 1-alpha, putative (fragment)           | 0,3734 | 0,297      |
| TcCLB.506559.220 | hypothetical protein, conserved                          | 0,3733 | 0,0009016  |
| TcCLB.511585.230 | trans-sialidase, Group II, putative                      | 0,3732 | 0,005151   |
| TcCLB.506559.314 | hypothetical protein, conserved                          | 0,3731 | 0,01855    |
| TcCLB.506513.170 | hypothetical protein, conserved (pseudogene)             | 0,373  | 0,0002042  |
| TcCLB.507689.20  | hypothetical protein                                     | 0,3729 | 0,01789    |
| TcCLB.507221.70  | hypothetical protein, conserved                          | 0,3724 | 0,03043    |
| TcCLB.507133.20  | trans-sialidase, putative (fragment)                     | 0,3724 | 0,04278    |
| TcCLB.508741.190 | hypothetical protein, conserved                          | 0,3722 | 0,0004905  |
| TcCLB.508567.49  | hypothetical protein, conserved                          | 0,3722 | 0,03227    |
| TcCLB.507793.50  | hypothetical protein, conserved                          | 0,3721 | 0,06659    |
| TcCLB.510879.140 | hypothetical protein, conserved                          | 0,372  | 0,001145   |
| TcCLB.511221.20  | hypothetical protein                                     | 0,372  | 0,124      |
| TcCLB.506297.160 | 40S ribosomal protein S5, putative                       | 0,3719 | 0,0002028  |
| TcCLB.508649.10  | beta propeller protein, putative                         | 0,3718 | 0,0001904  |
| TcCLB.463451.4   | hypothetical protein, conserved                          | 0,3717 | 0,0457     |
| TcCLB.508381.20  | hypothetical protein, conserved (pseudogene)             | 0,3717 | 0,07238    |
| TcCLB.505971.20  | hypothetical protein                                     | 0,3715 | 0,04923    |
| TcCLB.509683.40  | hypothetical protein, conserved                          | 0,3712 | 0,001076   |

|                   |                                                           |        |            |
|-------------------|-----------------------------------------------------------|--------|------------|
| TcCLB.509427.10   | trans-sialidase, Group II, putative                       | 0,3712 | 0,1867     |
| TcCLB.504009.10   | hypothetical protein, conserved                           | 0,3709 | 0,0006684  |
| TcCLB.511907.50   | lysophospholipase, putative                               | 0,3708 | 0,0001581  |
| TcCLB.509569.120  | RNA-binding protein, putative                             | 0,3708 | 0,0002467  |
| TcCLB.506959.60   | hypothetical protein, conserved                           | 0,3705 | 0,006259   |
| TcCLB.509905.190  | elongation factor 1-gamma (EF-1-gamma, pseudogene),       | 0,3703 | 0,1249     |
| TcCLB.510745.20   | hypothetical protein, conserved                           | 0,3702 | 0,002739   |
| TcCLB.511459.40   | hypothetical protein, conserved                           | 0,3701 | 0,0006886  |
| TcCLB.503735.10   | hypothetical protein, conserved                           | 0,37   | 0,0201     |
| TcCLB.506945.80   | DNA ligase I, putative                                    | 0,3699 | 0,00003548 |
| TcCLB.480653.10   | hypothetical protein, conserved                           | 0,3695 | 0,01864    |
| TcCLB.511735.10   | chaperonin HSP60/CNP60, putative                          | 0,3695 | 0,0314     |
| TcCLB.507993.220  | ARF-like 2-binding protein, putative                      | 0,3695 | 0,06179    |
| TcCLB.508647.40   | replication factor C large subunit, putative              | 0,3693 | 7,087E-07  |
| TcCLB.509885.40   | hypothetical protein, conserved                           | 0,3693 | 0,0005518  |
| TcCLB.511903.190  | STOP axonemal protein, putative                           | 0,3692 | 0,003086   |
| TcCLB.511471.60   | protein kinase, putative                                  | 0,3692 | 0,2245     |
| TcCLB.511731.24   | hypothetical protein                                      | 0,3691 | 0,001044   |
| TcCLB.506961.110  | hypothetical protein, conserved (pseudogene)              | 0,369  | 0,00008615 |
| TcCLB.508415.30   | hypothetical protein                                      | 0,369  | 0,0004199  |
| TcCLB.507993.89   | hypothetical protein, conserved                           | 0,369  | 0,01927    |
| TcCLB.507063.240  | hypothetical protein, conserved (pseudogene)              | 0,3689 | 2,999E-06  |
| TcCLB.508409.110  | hypothetical protein, conserved                           | 0,3689 | 0,0005465  |
| TcCLB.511817.90   | hypothetical protein, conserved                           | 0,3689 | 0,002689   |
| TcCLB.503995.20   | hypothetical protein, conserved                           | 0,3689 | 0,00323    |
| TcCLB.508153.1050 | hypothetical protein, conserved                           | 0,3687 | 8,098E-06  |
| TcCLB.511517.70   | RNA-binding protein, putative                             | 0,3687 | 0,000369   |
| TcCLB.506869.34   | hypothetical protein, conserved                           | 0,3686 | 0,003543   |
| TcCLB.506727.40   | hypothetical protein, conserved                           | 0,3685 | 0,02591    |
| TcCLB.506859.150  | hypothetical protein                                      | 0,3684 | 0,00003069 |
| TcCLB.506567.20   | hypothetical protein                                      | 0,3682 | 0,008078   |
| TcCLB.504867.110  | hypothetical protein, conserved                           | 0,3681 | 0,008241   |
| TcCLB.510143.50   | hypothetical protein, conserved                           | 0,3681 | 0,009568   |
| TcCLB.509445.30   | solanesyl-diphosphate synthase (SPPS)                     | 0,3676 | 5,298E-06  |
| TcCLB.510065.20   | DNA repair protein, putative                              | 0,3674 | 0,00005941 |
| TcCLB.506295.140  | hypothetical protein, conserved                           | 0,3673 | 0,0009298  |
| TcCLB.511445.140  | hypothetical protein                                      | 0,3673 | 0,001715   |
| TcCLB.511825.10   | hypothetical protein, conserved                           | 0,3672 | 0,0005768  |
| TcCLB.506581.10   | dolicholphosphate-mannose synthase, putative (DPMS)       | 0,3672 | 0,02481    |
| TcCLB.508621.30   | choline/carnitine O-acyltransferase (pseudogene), putativ | 0,3671 | 0,00001617 |
| TcCLB.507951.80   | Present in the outer mitochondrial membrane proteome 2    | 0,3671 | 0,0005138  |
| TcCLB.506855.90   | structural maintenance of chromosome protein 4, putativ   | 0,367  | 5,456E-06  |
| TcCLB.406933.10   | retrotransposon hot spot (RHS) protein, putative          | 0,367  | 0,0244     |
| TcCLB.508153.420  | hypothetical protein, conserved                           | 0,3669 | 0,00006822 |
| TcCLB.503939.50   | hypothetical protein, conserved                           | 0,3668 | 0,00004885 |

|                  |                                                          |        |            |
|------------------|----------------------------------------------------------|--------|------------|
| TcCLB.504741.250 | protein kinase, putative                                 | 0,3666 | 0,0001042  |
| TcCLB.506679.130 | hypothetical protein, conserved                          | 0,3666 | 0,001079   |
| TcCLB.509823.10  | hypothetical protein, conserved                          | 0,3666 | 0,01613    |
| TcCLB.511467.10  | hypothetical protein, conserved                          | 0,3664 | 0,001654   |
| TcCLB.505333.30  | hypothetical protein, conserved (pseudogene)             | 0,3664 | 0,17       |
| TcCLB.511367.320 | hypothetical protein, conserved                          | 0,3663 | 0,0005745  |
| TcCLB.509911.70  | mu-adaptin 4, putative                                   | 0,3663 | 0,003399   |
| TcCLB.508199.20  | hypothetical protein, conserved                          | 0,3661 | 0,006896   |
| TcCLB.508973.50  | ATP-dependent DEAD/H RNA helicase, putative              | 0,366  | 0,0001139  |
| TcCLB.503541.10  | hypothetical protein, conserved                          | 0,3659 | 0,007413   |
| TcCLB.510747.40  | surface protease GP63, putative                          | 0,3659 | 0,0382     |
| TcCLB.507275.20  | hypothetical protein, conserved                          | 0,3658 | 0,00001248 |
| TcCLB.511391.180 | Golgi/lysosome glycoprotein 1, putative (GLP1)           | 0,3657 | 0,00002847 |
| TcCLB.508355.170 | hypothetical protein, conserved                          | 0,3657 | 0,0004649  |
| TcCLB.506173.170 | retrotransposon hot spot protein (RHS, pseudogene), puta | 0,3656 | 0,003307   |
| TcCLB.508239.30  | neurobeachin/beige-like protein, putative                | 0,3654 | 7,127E-07  |
| TcCLB.511649.130 | vesicle-associated membrane protein, putative            | 0,3654 | 0,0001954  |
| TcCLB.509769.148 | dynein heavy chain, putative                             | 0,3654 | 0,007811   |
| TcCLB.509717.34  | hypothetical protein, conserved                          | 0,3654 | 0,009884   |
| TcCLB.509775.30  | hypothetical protein, conserved                          | 0,3652 | 0,00002626 |
| TcCLB.507503.11  | protein kinase (pseudogene), putative                    | 0,3652 | 0,00008082 |
| TcCLB.508181.110 | hypothetical protein, conserved                          | 0,3652 | 0,0001732  |
| TcCLB.506619.49  | ras-related protein Rab21, putative                      | 0,3651 | 0,0007535  |
| TcCLB.509419.230 | trans-sialidase (pseudogene), putative                   | 0,3649 | 0,03362    |
| TcCLB.509671.99  | hypothetical protein, conserved                          | 0,3649 | 0,04858    |
| TcCLB.508577.140 | cyclophilin, putative                                    | 0,3648 | 0,0002206  |
| TcCLB.504021.80  | hypothetical protein, conserved                          | 0,3647 | 0,006082   |
| TcCLB.504171.59  | pseudouridine synthase TruD, putative                    | 0,3647 | 0,01512    |
| TcCLB.503431.40  | hypothetical protein, conserved                          | 0,3647 | 0,0155     |
| TcCLB.508139.10  | retrotransposon hot spot (RHS) protein, putative         | 0,3646 | 0,04387    |
| TcCLB.509631.160 | hypothetical protein, conserved                          | 0,3645 | 0,003887   |
| TcCLB.507437.30  | trans-sialidase (pseudogene), putative                   | 0,364  | 0,1303     |
| TcCLB.511281.59  | hypothetical protein, conserved                          | 0,3637 | 0,0008282  |
| TcCLB.509895.80  | ATP-dependent zinc metallopeptidase (pseudogene), puta   | 0,3635 | 0,0001773  |
| TcCLB.507867.50  | hypothetical protein, conserved                          | 0,3635 | 0,01261    |
| TcCLB.506485.20  | hypothetical protein, conserved                          | 0,3634 | 0,002212   |
| TcCLB.510895.9   | hypothetical protein, conserved (fragment)               | 0,3632 | 0,00001095 |
| TcCLB.505009.40  | hypothetical protein, conserved                          | 0,3632 | 0,002165   |
| TcCLB.506729.80  | hypothetical protein, conserved                          | 0,3632 | 0,007457   |
| TcCLB.510943.33  | fatty acyl CoA synthetase, putative                      | 0,3631 | 0,003224   |
| TcCLB.511761.89  | hypothetical protein, conserved (fragment)               | 0,3631 | 0,04687    |
| TcCLB.511231.69  | hypothetical protein, conserved                          | 0,3629 | 0,0004115  |
| TcCLB.507985.20  | retrotransposon hot spot protein (RHS, pseudogene), puta | 0,3628 | 0,0389     |
| TcCLB.415331.10  | trans-sialidase (pseudogene), putative                   | 0,3627 | 0,003251   |
| TcCLB.509203.10  | 2,3-bisphosphoglycerate-independent phosphoglycerate n   | 0,3625 | 0,09133    |

|                  |                                                           |        |            |
|------------------|-----------------------------------------------------------|--------|------------|
| TcCLB.506871.100 | polypeptide deformylase-like protein, putative            | 0,3624 | 0,001678   |
| TcCLB.510577.10  | hypothetical protein, conserved                           | 0,3624 | 0,3094     |
| TcCLB.511535.30  | hypothetical protein, conserved                           | 0,3623 | 0,0001235  |
| TcCLB.510347.60  | protein kinase, putative                                  | 0,3622 | 0,002882   |
| TcCLB.508689.5   | hypothetical protein, conserved (pseudogene)              | 0,3621 | 0,04137    |
| TcCLB.506919.10  | hypothetical protein                                      | 0,362  | 0,1516     |
| TcCLB.506915.10  | hypothetical protein, conserved                           | 0,3619 | 0,00008364 |
| TcCLB.510101.290 | hypothetical protein, conserved                           | 0,3616 | 1,516E-07  |
| TcCLB.510055.60  | hypothetical protein, conserved                           | 0,3616 | 0,00002695 |
| TcCLB.504505.10  | retrotransposon hot spot protein (RHS, pseudogene), puta  | 0,3615 | 0,002412   |
| TcCLB.511277.539 | hypothetical protein, conserved                           | 0,3615 | 0,01953    |
| TcCLB.511231.80  | Nascent polypeptide-associated complex subunit beta, pu   | 0,3614 | 0,02404    |
| TcCLB.511421.210 | hypothetical protein, conserved                           | 0,3612 | 0,00006592 |
| TcCLB.508181.80  | hypothetical protein, conserved                           | 0,3612 | 0,0005094  |
| TcCLB.507499.53  | ATP-dependent DEAD/H RNA helicase (pseudogene), puta      | 0,3612 | 0,06768    |
| TcCLB.511641.5   | fucose kinase, putative                                   | 0,3612 | 0,1183     |
| TcCLB.509627.40  | succinate dehydrogenase subunit (SDH9)                    | 0,3611 | 0,003073   |
| TcCLB.509287.240 | dispersed gene family protein 1 (DGF-1), putative         | 0,3611 | 0,02058    |
| TcCLB.505807.50  | hypothetical protein, conserved                           | 0,361  | 0,01413    |
| TcCLB.509607.30  | splicing factor TSR1, putative                            | 0,3607 | 0,0001743  |
| TcCLB.445849.10  | hypothetical protein, conserved                           | 0,3607 | 0,009174   |
| TcCLB.507521.80  | hypothetical protein, conserved                           | 0,3603 | 0,0004402  |
| TcCLB.510187.80  | endonuclease V, putative                                  | 0,3601 | 0,008948   |
| TcCLB.506739.30  | hypothetical protein                                      | 0,36   | 0,0001735  |
| TcCLB.508141.60  | hypothetical protein, conserved                           | 0,3599 | 0,005749   |
| TcCLB.510955.10  | hypothetical protein, conserved                           | 0,3598 | 0,0001794  |
| TcCLB.506729.50  | hypothetical protein, conserved                           | 0,3595 | 0,00003335 |
| TcCLB.508479.350 | hypothetical protein, conserved                           | 0,3595 | 0,0002317  |
| TcCLB.508071.30  | beta galactofuranosyl glycosyltransferase, putative       | 0,3595 | 0,155      |
| TcCLB.508613.60  | hypothetical protein, conserved                           | 0,3593 | 0,0001799  |
| TcCLB.506817.20  | ABC transporter, putative                                 | 0,3593 | 0,001039   |
| TcCLB.507023.270 | hypothetical protein, conserved                           | 0,3592 | 0,0075     |
| TcCLB.504199.4   | hypothetical protein, conserved                           | 0,3591 | 0,1062     |
| TcCLB.511871.60  | hypothetical protein, conserved (pseudogene)              | 0,3587 | 0,003533   |
| TcCLB.510647.10  | hypothetical protein, conserved                           | 0,3586 | 0,01399    |
| TcCLB.504153.230 | hypothetical protein, conserved                           | 0,3584 | 0,002346   |
| TcCLB.506359.40  | hypothetical protein, conserved                           | 0,3584 | 0,005169   |
| TcCLB.507615.76  | hypothetical protein, conserved                           | 0,3584 | 0,005278   |
| TcCLB.507791.10  | retrotransposon hot spot (RHS) protein, putative (fragmer | 0,3584 | 0,3091     |
| TcCLB.508713.20  | hypothetical protein, conserved                           | 0,3582 | 0,00591    |
| TcCLB.507501.20  | hypothetical protein, conserved                           | 0,3582 | 0,2935     |
| TcCLB.504161.40  | hypothetical protein, conserved                           | 0,3581 | 0,0003675  |
| TcCLB.510355.240 | hypothetical protein, conserved                           | 0,3581 | 0,006532   |
| TcCLB.511521.9   | hypothetical protein, conserved                           | 0,3578 | 0,04016    |
| TcCLB.507257.150 | hypothetical protein, conserved                           | 0,3577 | 0,004523   |

|                  |                                                               |        |            |
|------------------|---------------------------------------------------------------|--------|------------|
| TcCLB.506979.20  | hypothetical protein, conserved                               | 0,3576 | 0,03001    |
| TcCLB.506433.10  | retrotransposon hot spot protein (RHS, pseudogene), puta      | 0,3575 | 0,005177   |
| TcCLB.508153.634 | hypothetical protein, conserved                               | 0,3575 | 0,02903    |
| TcCLB.508183.4   | aspartyl aminopeptidase, putative (fragment)                  | 0,3574 | 0,01624    |
| TcCLB.506775.140 | hypothetical protein, conserved                               | 0,3573 | 0,007792   |
| TcCLB.508355.114 | hypothetical protein, conserved                               | 0,3573 | 0,02776    |
| TcCLB.510181.130 | hypothetical protein                                          | 0,3572 | 0,01575    |
| TcCLB.506071.9   | dispersed gene family protein 1 (DGF-1), putative (fragme     | 0,3572 | 0,1779     |
| TcCLB.510971.30  | trans-sialidase, Group VIII, putative                         | 0,3572 | 0,1903     |
| TcCLB.507641.236 | hypothetical protein, conserved                               | 0,3571 | 0,0003646  |
| TcCLB.506529.220 | hypothetical protein, conserved                               | 0,3571 | 0,003122   |
| TcCLB.506985.10  | hypothetical protein, conserved                               | 0,3571 | 0,01106    |
| TcCLB.509693.30  | hypothetical protein, conserved                               | 0,3571 | 0,01348    |
| TcCLB.508323.50  | hypothetical protein, conserved                               | 0,3567 | 0,015      |
| TcCLB.504427.180 | hypothetical protein                                          | 0,3567 | 0,01769    |
| TcCLB.509379.20  | Tob55, putative                                               | 0,3566 | 0,003913   |
| TcCLB.508737.180 | hypothetical protein, conserved                               | 0,3564 | 0,00001253 |
| TcCLB.504027.20  | hypothetical protein                                          | 0,3563 | 0,001163   |
| TcCLB.508181.40  | choline/ethanolamine phosphotransferase, putative             | 0,3563 | 0,002101   |
| TcCLB.458015.10  | hypothetical protein, conserved                               | 0,3562 | 0,0003069  |
| TcCLB.509795.20  | hypothetical protein, conserved                               | 0,3562 | 0,02283    |
| TcCLB.510603.30  | hypothetical protein, conserved                               | 0,3561 | 0,1998     |
| TcCLB.511421.80  | Midasin, putative (pseudogene)                                | 0,356  | 0,0004009  |
| TcCLB.508207.64  | hypothetical protein, conserved                               | 0,356  | 0,005437   |
| TcCLB.508919.140 | hypothetical protein, conserved                               | 0,3559 | 9,152E-07  |
| TcCLB.511229.80  | eukaryotic translation initiation factor 3 subunit 2, putativ | 0,3559 | 0,0001144  |
| TcCLB.511303.80  | hypothetical protein, conserved                               | 0,3559 | 0,007604   |
| TcCLB.508231.210 | hypothetical protein, conserved                               | 0,3558 | 0,0002937  |
| TcCLB.503703.60  | hypothetical protein                                          | 0,3556 | 0,004313   |
| TcCLB.481435.9   | clathrin heavy chain, putative                                | 0,3554 | 0,001102   |
| TcCLB.506745.10  | hypothetical protein, conserved                               | 0,3553 | 0,01256    |
| TcCLB.507939.70  | hypothetical protein                                          | 0,3553 | 0,1961     |
| TcCLB.509053.120 | hypothetical protein, conserved                               | 0,3552 | 0,003779   |
| TcCLB.508647.120 | hypothetical protein, conserved                               | 0,3551 | 0,00006344 |
| TcCLB.506123.70  | hypothetical protein, conserved                               | 0,3551 | 0,08536    |
| TcCLB.506613.130 | dispersed gene family protein 1 (DGF-1), putative             | 0,3551 | 0,1445     |
| TcCLB.510081.30  | retrotransposon hot spot protein (RHS, pseudogene), puta      | 0,3548 | 0,005349   |
| TcCLB.506227.40  | hypothetical protein, conserved                               | 0,3547 | 0,002101   |
| TcCLB.505009.49  | hypothetical protein, conserved                               | 0,3547 | 0,003087   |
| TcCLB.507035.20  | retrotransposon hot spot protein (RHS, pseudogene), puta      | 0,3546 | 0,002619   |
| TcCLB.508645.70  | nucleoside transporter 1, putative                            | 0,3545 | 0,02091    |
| TcCLB.503923.50  | GPI transamidase subunit 16, putative (fragment) (GPI16)      | 0,3544 | 0,003194   |
| TcCLB.509799.100 | hypothetical protein, conserved                               | 0,3539 | 0,0005774  |
| TcCLB.506729.9   | heat shock 70 kDa protein, putative (fragment)                | 0,3539 | 0,02952    |
| TcCLB.506629.230 | retrotransposon hot spot protein (RHS, pseudogene), puta      | 0,3537 | 0,00166    |



|                  |                                                            |        |            |
|------------------|------------------------------------------------------------|--------|------------|
| TcCLB.511855.20  | ubiquitin-like protein, putative                           | 0,3536 | 0,00001425 |
| TcCLB.507105.70  | ABC transporter, putative                                  | 0,3536 | 0,001023   |
| TcCLB.506369.50  | hypothetical protein, conserved                            | 0,3536 | 0,01095    |
| TcCLB.505171.50  | ras-related GTP-binding protein, putative                  | 0,3536 | 0,02729    |
| TcCLB.506999.80  | hypothetical protein, conserved                            | 0,3535 | 0,01116    |
| TcCLB.506635.44  | hypothetical protein, conserved                            | 0,3535 | 0,02117    |
| TcCLB.508153.900 | hypothetical protein, conserved                            | 0,3534 | 0,0002593  |
| TcCLB.503809.149 | TATA binding protein (TBP)                                 | 0,3533 | 0,002588   |
| TcCLB.508479.210 | hypothetical protein, conserved                            | 0,3531 | 0,002882   |
| TcCLB.503633.30  | surface protease GP63, putative                            | 0,3531 | 0,3077     |
| TcCLB.507939.14  | hypothetical protein, conserved                            | 0,353  | 0,01696    |
| TcCLB.511279.30  | ARF-like 2-binding protein, putative                       | 0,3529 | 0,04387    |
| TcCLB.510719.70  | bromodomain-containing protein 3 (BDF3)                    | 0,3527 | 0,001297   |
| TcCLB.506697.50  | peptidyl-prolyl cis-trans isomerase NIMA-interacting 4, pu | 0,3526 | 0,02602    |
| TcCLB.509799.10  | adaptin complex 4 subunit, putative                        | 0,3521 | 0,0106     |
| TcCLB.508355.120 | hypothetical protein, conserved                            | 0,3518 | 0,0007849  |
| TcCLB.508025.10  | retrotransposon hot spot (RHS) protein, putative (fragmer  | 0,3518 | 0,09733    |
| TcCLB.511301.20  | hypothetical protein, conserved                            | 0,3517 | 0,002666   |
| TcCLB.503575.54  | hypothetical protein, conserved                            | 0,3517 | 0,004708   |
| TcCLB.510091.40  | Mad2-like HORMA domain containing protein (mad2)           | 0,3515 | 0,002197   |
| TcCLB.509611.10  | DNA repair and recombination helicase protein PIF7, puta   | 0,3514 | 0,009768   |
| TcCLB.508419.30  | tryptophanyl-tRNA synthetase (pseudogene), putative        | 0,3514 | 0,01248    |
| TcCLB.508205.20  | nucleolar RNA helicase II, putative                        | 0,3512 | 0,001533   |
| TcCLB.510769.190 | retrotransposon hot spot protein (RHS, pseudogene), puta   | 0,3512 | 0,007903   |
| TcCLB.408345.20  | 2-oxoglutarate dehydrogenase subunit, putative (fragmen    | 0,3511 | 0,02862    |
| TcCLB.509971.80  | hypothetical protein, conserved                            | 0,351  | 0,5093     |
| TcCLB.508169.40  | mitochondrial inner membrane signal peptidase, putative    | 0,3509 | 0,04453    |
| TcCLB.508175.220 | hypothetical protein, conserved                            | 0,3508 | 0,0006667  |
| TcCLB.503703.30  | hypothetical protein, conserved                            | 0,3508 | 0,002771   |
| TcCLB.511531.40  | chaperonin alpha subunit, putative                         | 0,3506 | 7,452E-07  |
| TcCLB.511907.340 | hypothetical protein, conserved                            | 0,3506 | 0,04107    |
| TcCLB.507165.59  | hypothetical protein, conserved                            | 0,3505 | 0,003983   |
| TcCLB.503575.50  | fatty acyl CoA synthetase, putative                        | 0,3504 | 0,002934   |
| TcCLB.505931.40  | histone H3, putative                                       | 0,3501 | 0,02202    |
| TcCLB.507975.40  | dispersed gene family protein 1 (DGF-1), putative          | 0,35   | 0,01683    |
| TcCLB.509693.110 | hypothetical protein, conserved                            | 0,3498 | 0,02094    |
| TcCLB.511131.30  | hypothetical protein, conserved                            | 0,3497 | 0,0008126  |
| TcCLB.398009.10  | retrotransposon hot spot protein (RHS, pseudogene), puta   | 0,3497 | 0,003632   |
| TcCLB.507715.70  | hypothetical protein, conserved                            | 0,3495 | 0,0007007  |
| TcCLB.510431.230 | hypothetical protein, conserved                            | 0,3494 | 0,00184    |
| TcCLB.505807.150 | Leucine-rich repeat, ribonuclease inhibitor subtype domai  | 0,3494 | 0,002883   |
| TcCLB.507027.40  | hypothetical protein, conserved                            | 0,3494 | 0,01991    |
| TcCLB.511871.90  | hypothetical protein, conserved                            | 0,3493 | 0,004244   |
| TcCLB.511277.350 | tubulin-specific chaperone, putative                       | 0,3492 | 0,0001573  |
| TcCLB.507645.20  | hypothetical protein, conserved                            | 0,3492 | 0,001709   |

|                  |                                                             |        |            |
|------------------|-------------------------------------------------------------|--------|------------|
| TcCLB.510241.110 | hypothetical protein, conserved                             | 0,3491 | 0,00004207 |
| TcCLB.508257.150 | small nuclear ribonucleoprotein SmD3, putative              | 0,3489 | 0,004339   |
| TcCLB.509551.50  | hypothetical protein                                        | 0,3487 | 4,964E-06  |
| TcCLB.510659.120 | dolichol kinase, putative                                   | 0,3485 | 0,0002128  |
| TcCLB.511211.90  | surface protease GP63, putative                             | 0,3483 | 0,02189    |
| TcCLB.506051.20  | hypothetical protein                                        | 0,3483 | 0,3207     |
| TcCLB.509551.130 | hypothetical protein, conserved                             | 0,3482 | 0,001165   |
| TcCLB.511735.50  | hypothetical protein, conserved                             | 0,3482 | 0,001431   |
| TcCLB.509997.73  | hypothetical protein, conserved                             | 0,3478 | 0,003883   |
| TcCLB.511689.19  | hypothetical protein, conserved (fragment)                  | 0,3475 | 0,007678   |
| TcCLB.509645.10  | hypothetical protein, conserved                             | 0,3473 | 0,0004788  |
| TcCLB.504057.50  | hypothetical protein, conserved                             | 0,3473 | 0,00106    |
| TcCLB.506401.330 | hypothetical protein, conserved                             | 0,3473 | 0,002215   |
| TcCLB.510115.50  | retrotransposon hot spot protein (RHS, pseudogene), puta    | 0,3473 | 0,004449   |
| TcCLB.504159.10  | hypothetical protein, conserved                             | 0,3472 | 0,002714   |
| TcCLB.507801.150 | hypothetical protein, conserved                             | 0,3472 | 0,05727    |
| TcCLB.507179.14  | hypothetical protein                                        | 0,3472 | 0,1607     |
| TcCLB.504741.200 | hypothetical protein, conserved                             | 0,347  | 0,001679   |
| TcCLB.507063.80  | hypothetical protein, conserved                             | 0,3469 | 0,005896   |
| TcCLB.445011.10  | hypothetical protein, conserved                             | 0,3469 | 0,008045   |
| TcCLB.511509.40  | hypothetical protein, conserved                             | 0,3469 | 0,04586    |
| TcCLB.507811.70  | hypothetical protein, conserved                             | 0,3468 | 0,002298   |
| TcCLB.511691.30  | ubiquitin activating enzyme, putative                       | 0,3467 | 0,006156   |
| TcCLB.510689.20  | quinonoid dihydropteridine reductase, putative              | 0,3466 | 0,002924   |
| TcCLB.511023.19  | Tetratricopeptide-like helical domain containing protein (l | 0,3465 | 0,01068    |
| TcCLB.510911.20  | hypothetical protein, conserved                             | 0,3464 | 0,004792   |
| TcCLB.508681.40  | dispersed gene family protein 1 (DGF-1), putative           | 0,3464 | 0,4147     |
| TcCLB.508323.20  | hypothetical protein, conserved                             | 0,3463 | 0,00004144 |
| TcCLB.506573.40  | hypothetical protein, conserved                             | 0,3463 | 0,0006902  |
| TcCLB.505193.80  | hypothetical protein, conserved                             | 0,3463 | 0,002656   |
| TcCLB.511151.54  | surface protease GP63, putative                             | 0,3463 | 0,006889   |
| TcCLB.506485.50  | hypothetical protein                                        | 0,3462 | 0,004742   |
| TcCLB.509513.5   | hypothetical protein, conserved (pseudogene)                | 0,3462 | 0,01587    |
| TcCLB.509207.120 | hypothetical protein, conserved                             | 0,3461 | 0,00002062 |
| TcCLB.503599.20  | hypothetical protein, conserved                             | 0,346  | 0,03216    |
| TcCLB.510165.50  | hypothetical protein, conserved                             | 0,3459 | 0,02489    |
| TcCLB.511019.80  | retrotransposon hot spot (RHS) protein, putative            | 0,3458 | 0,002491   |
| TcCLB.509753.180 | hypothetical protein, conserved (pseudogene)                | 0,3458 | 0,1923     |
| TcCLB.509027.10  | DNA photolyase, putative                                    | 0,3457 | 0,01355    |
| TcCLB.507993.340 | hypothetical protein                                        | 0,3456 | 0,1415     |
| TcCLB.509599.170 | hypothetical protein, conserved                             | 0,3455 | 0,007564   |
| TcCLB.510661.40  | hypothetical protein, conserved                             | 0,3454 | 0,0002174  |
| TcCLB.506145.24  | hypothetical protein, conserved                             | 0,3454 | 0,004484   |
| TcCLB.506777.40  | hypothetical protein, conserved                             | 0,3453 | 0,0001639  |
| TcCLB.506885.250 | hypothetical protein                                        | 0,3453 | 0,001384   |

|                  |                                                           |        |            |
|------------------|-----------------------------------------------------------|--------|------------|
| TcCLB.507825.30  | Present in the outer mitochondrial membrane proteome 2    | 0,3452 | 0,0001414  |
| TcCLB.510657.110 | hypothetical protein, conserved                           | 0,3452 | 0,0006779  |
| TcCLB.503805.9   | Quinonprotein alcohol dehydrogenase-like protein, putativ | 0,345  | 0,003186   |
| TcCLB.503643.30  | hypothetical protein, conserved                           | 0,3447 | 0,005367   |
| TcCLB.506459.250 | hypothetical protein, conserved                           | 0,3447 | 0,007583   |
| TcCLB.510835.60  | hypothetical protein, conserved                           | 0,3446 | 0,0002361  |
| TcCLB.504411.40  | hypothetical protein, conserved                           | 0,3446 | 0,006167   |
| TcCLB.511719.30  | hypothetical protein, conserved                           | 0,3441 | 0,02054    |
| TcCLB.422207.21  | retrotransposon hot spot protein (RHS, pseudogene), puta  | 0,3439 | 0,2612     |
| TcCLB.507029.60  | hypothetical protein, conserved                           | 0,3437 | 0,004488   |
| TcCLB.506251.110 | hypothetical protein, conserved                           | 0,3437 | 0,007704   |
| TcCLB.506887.90  | hypothetical protein, conserved                           | 0,3436 | 0,0003869  |
| TcCLB.509059.70  | hypothetical protein, conserved                           | 0,3436 | 0,0007773  |
| TcCLB.511041.10  | hypothetical protein, conserved                           | 0,3436 | 0,003366   |
| TcCLB.506017.20  | hypothetical protein, conserved (pseudogene)              | 0,3432 | 0,001103   |
| TcCLB.503613.70  | hypothetical protein, conserved                           | 0,3432 | 0,03111    |
| TcCLB.504351.41  | ATP-dependent DEAD/H RNA helicase (pseudogene), puta      | 0,3431 | 0,2682     |
| TcCLB.511445.130 | Mitochondrial SSU ribosomal protein, putative             | 0,3429 | 0,0004839  |
| TcCLB.507005.4   | acyl transferase-like protein                             | 0,3428 | 0,002159   |
| TcCLB.509229.130 | hypothetical protein, conserved                           | 0,3428 | 0,01344    |
| TcCLB.503793.20  | phosphatidylinositol (3,5) kinase, putative (fragment)    | 0,3428 | 0,1261     |
| TcCLB.507093.300 | hypothetical protein SCD6.10                              | 0,3426 | 0,000906   |
| TcCLB.507505.30  | hypothetical protein                                      | 0,3426 | 0,002273   |
| TcCLB.507785.10  | clathrin heavy chain, putative                            | 0,3425 | 0,00004109 |
| TcCLB.505807.90  | hypothetical protein, conserved                           | 0,3423 | 0,00009816 |
| TcCLB.508547.90  | hypothetical protein, conserved                           | 0,3423 | 0,08531    |
| TcCLB.506063.34  | hypothetical protein, conserved (pseudogene)              | 0,3421 | 0,0002419  |
| TcCLB.509599.70  | hypothetical protein, conserved                           | 0,3421 | 0,006943   |
| TcCLB.506265.90  | hypothetical protein, conserved                           | 0,3421 | 0,01655    |
| TcCLB.508269.73  | ATP-dependent DEAD/H RNA helicase (pseudogene), puta      | 0,3421 | 0,07661    |
| TcCLB.511283.300 | hypothetical protein, conserved                           | 0,342  | 0,0007811  |
| TcCLB.510121.150 | serine/threonine protein kinase, putative                 | 0,3418 | 0,002478   |
| TcCLB.504575.15  | ubiquinol-cytochrome-C-reductase, putative                | 0,3418 | 0,1944     |
| TcCLB.511277.280 | hypothetical protein, conserved                           | 0,3417 | 0,000196   |
| TcCLB.511217.90  | hypothetical protein, conserved                           | 0,3416 | 0,00002688 |
| TcCLB.510751.40  | Importin 1 (fragment) (IMP1)                              | 0,3416 | 0,0003206  |
| TcCLB.509167.190 | protein kinase-like protein, putative                     | 0,3414 | 0,0002247  |
| TcCLB.506859.160 | hypothetical protein, conserved                           | 0,3414 | 0,0003825  |
| TcCLB.510989.60  | hypothetical protein, conserved                           | 0,3414 | 0,0005691  |
| TcCLB.466823.10  | Checkpoint protein HUS1, putative                         | 0,3414 | 0,03511    |
| TcCLB.506349.40  | glycine dehydrogenase [decarboxylating] (pseudogene), p   | 0,3413 | 0,2746     |
| TcCLB.507899.10  | retrotransposon hot spot protein (RHS, pseudogene), puta  | 0,3407 | 0,009955   |
| TcCLB.511733.50  | hypothetical protein, conserved                           | 0,3406 | 0,0002723  |
| TcCLB.507603.50  | Mitochondrial Ribosomal Protein of Small Subunit 29, put  | 0,3406 | 0,002332   |
| TcCLB.506193.70  | glucose-6-phosphate dehydrogenase (pseudogene), putati    | 0,3405 | 0,0039     |

|                  |                                                              |        |           |
|------------------|--------------------------------------------------------------|--------|-----------|
| TcCLB.508541.220 | casein kinase, putative                                      | 0,3405 | 0,0869    |
| TcCLB.509167.30  | hypothetical protein, conserved                              | 0,3403 | 0,01796   |
| TcCLB.506933.80  | RNA polymerase B subunit RPB8, putative                      | 0,3402 | 0,001163  |
| TcCLB.510535.10  | hypothetical protein, conserved                              | 0,3402 | 0,003503  |
| TcCLB.509027.30  | hypothetical protein, conserved                              | 0,3402 | 0,01328   |
| TcCLB.508919.94  | hypothetical protein, conserved                              | 0,3401 | 0,01762   |
| TcCLB.508799.190 | hypothetical protein, conserved                              | 0,3399 | 0,0002352 |
| TcCLB.506999.170 | hypothetical protein                                         | 0,3399 | 0,001265  |
| TcCLB.506933.107 | hypothetical protein, conserved                              | 0,3398 | 0,009642  |
| TcCLB.510837.30  | hypothetical protein, conserved                              | 0,3397 | 0,02624   |
| TcCLB.506977.130 | ras-related protein Rab21, putative (RAB21)                  | 0,3395 | 0,00304   |
| TcCLB.511065.23  | hypothetical protein, conserved                              | 0,3393 | 0,0166    |
| TcCLB.506355.80  | flagellum transition zone component, putative                | 0,3392 | 2,064E-06 |
| TcCLB.505999.170 | hypothetical protein, conserved                              | 0,3389 | 6,385E-06 |
| TcCLB.506239.30  | lectin, putative (AG38)                                      | 0,3388 | 0,0001287 |
| TcCLB.509921.20  | trans-sialidase (pseudogene), putative                       | 0,3387 | 0,04949   |
| TcCLB.510311.80  | hypothetical protein, conserved                              | 0,3386 | 0,002859  |
| TcCLB.510867.9   | dispersed gene family protein 1 (DGF-1), putative            | 0,3384 | 0,09069   |
| TcCLB.510437.30  | hypothetical protein, conserved                              | 0,3384 | 0,1292    |
| TcCLB.510275.10  | hypothetical protein                                         | 0,3383 | 0,03046   |
| TcCLB.511507.60  | hypothetical protein                                         | 0,3383 | 0,03871   |
| TcCLB.507529.45  | hypothetical protein, conserved                              | 0,3381 | 0,03018   |
| TcCLB.510759.180 | hypothetical protein, conserved                              | 0,338  | 0,000484  |
| TcCLB.506679.190 | hypothetical protein, conserved                              | 0,338  | 0,0005575 |
| TcCLB.511421.60  | deoxyhypusine synthase, putative                             | 0,338  | 0,01025   |
| TcCLB.507795.40  | hypothetical protein, conserved                              | 0,338  | 0,1249    |
| TcCLB.506695.49  | hypothetical protein, conserved                              | 0,3379 | 0,0002953 |
| TcCLB.510219.40  | hypothetical protein, conserved                              | 0,3378 | 0,008836  |
| TcCLB.507519.30  | Eukaryotic translation initiation factor 4E type 6, putative | 0,3377 | 0,003234  |
| TcCLB.508375.60  | succinate dehydrogenase subunit                              | 0,3377 | 0,005357  |
| TcCLB.510299.30  | hypothetical protein, conserved                              | 0,3376 | 0,0125    |
| TcCLB.510119.60  | hypothetical protein, conserved                              | 0,3374 | 0,02427   |
| TcCLB.511843.90  | hypothetical protein, conserved (pseudogene)                 | 0,3369 | 0,03346   |
| TcCLB.504033.110 | hypothetical protein, conserved                              | 0,3368 | 0,004944  |
| TcCLB.458759.20  | hypothetical protein, conserved                              | 0,3368 | 0,03941   |
| TcCLB.506179.5   | ferric reductase transmembrane protein, putative (fragme     | 0,3368 | 0,3437    |
| TcCLB.510947.10  | GDP-mannose pyrophosphorylase                                | 0,3363 | 0,0003289 |
| TcCLB.508547.170 | hypothetical protein, conserved                              | 0,3361 | 0,000029  |
| TcCLB.503431.80  | hypothetical protein, conserved                              | 0,336  | 0,005408  |
| TcCLB.507049.170 | Axonemal inner arm dynein light chain, putative              | 0,336  | 0,00563   |
| TcCLB.509023.200 | cdc2-related kinase 12 (CRK12)                               | 0,3358 | 0,0004448 |
| TcCLB.510359.570 | mucin-associated surface protein (MASP), putative            | 0,3358 | 0,06055   |
| TcCLB.504021.60  | hypothetical protein, conserved                              | 0,3357 | 0,00663   |
| TcCLB.510565.160 | hypothetical protein, conserved                              | 0,3357 | 0,02272   |
| TcCLB.511219.10  | dispersed gene family protein 1 (DGF-1), putative            | 0,3357 | 0,4407    |

|                  |                                                          |        |            |
|------------------|----------------------------------------------------------|--------|------------|
| TcCLB.507001.130 | hypothetical protein, conserved                          | 0,3356 | 0,00435    |
| TcCLB.506435.110 | hypothetical protein, conserved                          | 0,3355 | 0,03677    |
| TcCLB.503593.50  | hypothetical protein, conserved                          | 0,3352 | 0,0002149  |
| TcCLB.504125.50  | mitochondrial carrier protein, putative                  | 0,3351 | 0,004431   |
| TcCLB.506251.100 | poly(A)-specific ribonuclease PARN, putative             | 0,3349 | 0,009047   |
| TcCLB.507165.20  | hypothetical protein, conserved                          | 0,3349 | 0,09257    |
| TcCLB.506493.30  | hypothetical protein, conserved                          | 0,3348 | 0,004924   |
| TcCLB.508879.210 | hypothetical protein, conserved                          | 0,3345 | 0,003637   |
| TcCLB.510155.60  | hypothetical protein, conserved                          | 0,3345 | 0,008903   |
| TcCLB.506791.30  | hypothetical protein, conserved                          | 0,3343 | 0,0001086  |
| TcCLB.505647.20  | hypothetical protein, conserved                          | 0,334  | 0,00005112 |
| TcCLB.507483.20  | ef-hand protein 5, putative                              | 0,334  | 0,01723    |
| TcCLB.510283.120 | hypothetical protein, conserved                          | 0,3339 | 0,005092   |
| TcCLB.508775.20  | retrotransposon hot spot protein (RHS, pseudogene), puta | 0,3339 | 0,03358    |
| TcCLB.506305.40  | kinesin, putative                                        | 0,3339 | 0,107      |
| TcCLB.504191.10  | sterol 24-c-methyltransferase, putative                  | 0,3338 | 0,00005691 |
| TcCLB.510307.220 | retrotransposon hot spot (RHS) protein, putative         | 0,3338 | 0,01635    |
| TcCLB.504923.10  | dispersed gene family protein 1 (DGF-1), putative        | 0,3337 | 0,4922     |
| TcCLB.503925.90  | hypothetical protein, conserved                          | 0,3336 | 0,1579     |
| TcCLB.507257.120 | hypothetical protein, conserved                          | 0,3335 | 0,01689    |
| TcCLB.507159.37  | hypothetical protein, conserved                          | 0,3334 | 0,01035    |
| TcCLB.509151.29  | hypothetical protein, conserved (pseudogene)             | 0,3334 | 0,09335    |
| TcCLB.511419.4   | hypothetical protein, conserved (fragment)               | 0,3334 | 0,1311     |
| TcCLB.506559.10  | hypothetical protein                                     | 0,3333 | 0,002029   |
| TcCLB.506999.100 | hypothetical protein, conserved                          | 0,3333 | 0,0154     |
| TcCLB.510593.20  | hypothetical protein, conserved                          | 0,3332 | 0,001153   |
| TcCLB.506303.70  | hypothetical protein, conserved                          | 0,3329 | 0,001195   |
| TcCLB.508461.140 | poly(A)-binding protein, putative                        | 0,3326 | 6,915E-06  |
| TcCLB.510121.190 | hypothetical protein, conserved                          | 0,3326 | 0,02895    |
| TcCLB.510647.60  | intraflagellar transport protein 27 (IFT27)              | 0,3325 | 0,005136   |
| TcCLB.507641.40  | hypothetical protein, conserved                          | 0,3323 | 0,00002197 |
| TcCLB.509715.120 | phosphatidylinositol-4-phosphate 5-kinase, putative      | 0,3323 | 0,002918   |
| TcCLB.509025.29  | DNA photolyase, putative                                 | 0,3323 | 0,026      |
| TcCLB.506537.240 | hypothetical protein, conserved                          | 0,3323 | 0,03946    |
| TcCLB.508645.40  | nucleoside transporter 1, putative                       | 0,3321 | 5,942E-07  |
| TcCLB.510751.10  | poly(A)-specific ribonuclease PARN, putative             | 0,3321 | 0,0009975  |
| TcCLB.506831.5   | hypothetical protein, conserved (fragment)               | 0,3319 | 0,1386     |
| TcCLB.511477.25  | hypothetical protein, conserved (pseudogene)             | 0,3318 | 0,1417     |
| TcCLB.506859.30  | hypothetical protein                                     | 0,3317 | 0,0004255  |
| TcCLB.506245.73  | elongation factor 1-gamma (EF-1-gamma, pseudogene),      | 0,3315 | 0,421      |
| TcCLB.508257.100 | hypothetical protein, conserved                          | 0,3312 | 0,03432    |
| TcCLB.511263.9   | heat shock protein 110, putative (fragment)              | 0,3311 | 0,00006488 |
| TcCLB.511453.10  | dispersed gene family protein 1 (DGF-1), putative        | 0,331  | 0,173      |
| TcCLB.509599.164 | engulfment and cell motility domain 2, putative          | 0,3309 | 0,0009955  |
| TcCLB.508659.40  | protein phosphatase 2C-like (pseudogene), putative       | 0,3309 | 0,04737    |

|                  |                                                             |        |            |
|------------------|-------------------------------------------------------------|--------|------------|
| TcCLB.509859.80  | coronin, putative (CRN12)                                   | 0,3308 | 0,0000321  |
| TcCLB.511215.30  | hypothetical protein                                        | 0,3308 | 0,001808   |
| TcCLB.506775.100 | DNA repair and recombination helicase protein PIF2, puta    | 0,3308 | 0,02806    |
| TcCLB.503953.59  | mitochondrial DNA polymerase beta-PAK, putative             | 0,3305 | 0,01312    |
| TcCLB.510565.70  | protein kinase, putative                                    | 0,3304 | 0,0001514  |
| TcCLB.508475.30  | surface protease GP63, putative                             | 0,3304 | 0,04627    |
| TcCLB.508449.31  | trans-sialidase, putative                                   | 0,3304 | 0,4282     |
| TcCLB.506297.290 | protein transport protein SEC31, putative                   | 0,3303 | 4,481E-06  |
| TcCLB.506581.60  | hypothetical protein, conserved                             | 0,3301 | 0,005167   |
| TcCLB.504575.10  | hypothetical protein, conserved                             | 0,3301 | 0,1478     |
| TcCLB.511907.40  | hypothetical protein, conserved                             | 0,33   | 0,02036    |
| TcCLB.506531.60  | hypothetical protein, conserved                             | 0,3299 | 0,0009664  |
| TcCLB.508269.50  | hypothetical protein, conserved                             | 0,3299 | 0,002053   |
| TcCLB.503987.60  | hypothetical protein, conserved                             | 0,3299 | 0,02608    |
| TcCLB.508471.10  | hypothetical protein, conserved                             | 0,3299 | 0,03462    |
| TcCLB.510743.40  | prenyl protein specific carboxyl methyltransferase, putativ | 0,3297 | 0,007945   |
| TcCLB.506821.110 | hypothetical protein, conserved                             | 0,3297 | 0,02175    |
| TcCLB.511277.4   | 30S ribosomal protein S8, putative (fragment)               | 0,3295 | 0,02148    |
| TcCLB.510307.77  | N-acetyltransferase complex ARD1 subunit (pseudogene),      | 0,3294 | 0,125      |
| TcCLB.509657.20  | dispersed gene family protein 1 (DGF-1), putative           | 0,3291 | 0,09216    |
| TcCLB.510007.30  | RNA-binding protein, putative                               | 0,329  | 0,002503   |
| TcCLB.509695.60  | hypothetical protein, conserved                             | 0,329  | 0,01228    |
| TcCLB.507011.269 | 6-phosphogluconate dehydrogenase, decarboxylating (6PC      | 0,3288 | 0,09768    |
| TcCLB.508265.100 | hypothetical protein, conserved                             | 0,3287 | 0,0007838  |
| TcCLB.510603.160 | hypothetical protein, conserved                             | 0,3287 | 0,01172    |
| TcCLB.508723.59  | hypothetical protein, conserved                             | 0,3284 | 0,008509   |
| TcCLB.507229.20  | dispersed gene family protein 1 (DGF-1, pseudogene), put    | 0,3284 | 0,04693    |
| TcCLB.510729.70  | proteasome alpha 1 subunit, putative                        | 0,3283 | 0,0002598  |
| TcCLB.510779.10  | tryptophanyl-tRNA synthetase (pseudogene), putative         | 0,328  | 0,04428    |
| TcCLB.506801.90  | hypothetical protein, conserved                             | 0,3278 | 0,01042    |
| TcCLB.397937.5   | N-acetylglucosamine-6-phosphate deacetylase-like protei     | 0,3276 | 0,03996    |
| TcCLB.509023.190 | hypothetical protein, conserved                             | 0,3274 | 0,08882    |
| TcCLB.508595.50  | cysteine peptidase, putative                                | 0,3273 | 0,00008576 |
| TcCLB.507771.50  | glycerolphosphate mutase, putative                          | 0,3273 | 0,00249    |
| TcCLB.508401.70  | ATP-dependent DEAD/H RNA helicase (pseudogene), puta        | 0,3273 | 0,09657    |
| TcCLB.503559.109 | electron-transfer-flavoprotein, alpha polypeptide, putative | 0,3272 | 0,001492   |
| TcCLB.507511.10  | cleavage and polyadenylation specificity factor, putative   | 0,3272 | 0,001808   |
| TcCLB.510155.200 | hypothetical protein, conserved                             | 0,3271 | 0,004524   |
| TcCLB.410943.10  | hypothetical protein, conserved                             | 0,3271 | 0,1986     |
| TcCLB.509053.70  | p22 protein precursor, putative                             | 0,3269 | 0,007477   |
| TcCLB.506745.30  | hypothetical protein, conserved                             | 0,3269 | 0,3657     |
| TcCLB.507467.50  | hypothetical protein, conserved                             | 0,3268 | 0,01083    |
| TcCLB.503579.20  | hypothetical protein, conserved                             | 0,3264 | 0,002844   |
| TcCLB.506833.30  | serine/threonine protein phosphatase, putative              | 0,3264 | 0,003616   |
| TcCLB.509631.150 | hypothetical protein, conserved                             | 0,3263 | 0,1743     |

|                  |                                                                 |        |            |
|------------------|-----------------------------------------------------------------|--------|------------|
| TcCLB.506925.470 | heat shock protein DNAJ, putative                               | 0,3262 | 0,0007922  |
| TcCLB.507609.10  | nucleoporin interacting component (NUP93), putative             | 0,3262 | 0,01684    |
| TcCLB.508479.310 | hypothetical protein, conserved                                 | 0,3261 | 0,009147   |
| TcCLB.479721.10  | hypothetical protein, conserved (pseudogene)                    | 0,3261 | 0,4378     |
| TcCLB.509097.28  | hypothetical protein, conserved                                 | 0,3259 | 0,103      |
| TcCLB.416605.20  | mucin TcMUCII (pseudogene), putative                            | 0,3259 | 0,285      |
| TcCLB.507257.30  | hypothetical protein, conserved                                 | 0,3257 | 0,02519    |
| TcCLB.504221.9   | membrane associated protein, putative                           | 0,3255 | 0,002865   |
| TcCLB.506209.70  | dispersed gene family protein 1 (DGF-1), putative               | 0,3255 | 0,1918     |
| TcCLB.510853.96  | trans-sialidase (pseudogene), putative                          | 0,3253 | 0,00381    |
| TcCLB.509755.89  | hypothetical protein                                            | 0,325  | 0,2798     |
| TcCLB.490507.10  | hypothetical protein, conserved                                 | 0,3246 | 0,005245   |
| TcCLB.508873.530 | hypothetical protein, conserved (pseudogene)                    | 0,3244 | 0,106      |
| TcCLB.511737.10  | small glutamine-rich tetratricopeptide repeat protein, putative | 0,3241 | 0,002223   |
| TcCLB.504131.140 | hypothetical protein, conserved                                 | 0,3238 | 0,0000319  |
| TcCLB.507047.130 | hypothetical protein, conserved                                 | 0,3238 | 0,008621   |
| TcCLB.510519.80  | hypothetical protein, conserved                                 | 0,3234 | 0,01923    |
| TcCLB.509953.9   | ubiquitin carboxyl-terminal hydrolase, putative (fragment)      | 0,3233 | 0,04525    |
| TcCLB.506529.150 | hypothetical protein, conserved                                 | 0,323  | 0,0002863  |
| TcCLB.511133.10  | hypothetical protein, conserved                                 | 0,323  | 0,06131    |
| TcCLB.509765.60  | retrotransposon hot spot protein (RHS, pseudogene), putative    | 0,3229 | 0,004152   |
| TcCLB.511589.260 | glycyl-tRNA synthetase, putative                                | 0,3228 | 0,04654    |
| TcCLB.507819.11  | N-acetyltransferase complex ARD1 subunit (pseudogene), putative | 0,3228 | 0,1409     |
| TcCLB.510969.20  | hypothetical protein, conserved                                 | 0,3227 | 0,01081    |
| TcCLB.509505.89  | hypothetical protein, conserved                                 | 0,3227 | 0,01141    |
| TcCLB.509763.20  | hypothetical protein                                            | 0,3226 | 0,04617    |
| TcCLB.503925.20  | hypothetical protein, conserved                                 | 0,3225 | 0,003068   |
| TcCLB.508699.80  | hypothetical protein, conserved                                 | 0,3222 | 0,003051   |
| TcCLB.509059.80  | hypothetical protein, conserved                                 | 0,3221 | 0,0004299  |
| TcCLB.505807.200 | hypothetical protein, conserved                                 | 0,3221 | 0,001967   |
| TcCLB.508707.270 | hypothetical protein, conserved                                 | 0,322  | 0,001266   |
| TcCLB.507211.40  | inosine-5'-monophosphate dehydrogenase, putative                | 0,3219 | 0,00003965 |
| TcCLB.509567.10  | hypothetical protein, conserved                                 | 0,3219 | 0,01236    |
| TcCLB.454787.20  | elongation factor 1-gamma (EF-1-gamma, pseudogene), putative    | 0,3217 | 0,418      |
| TcCLB.511367.170 | vacuolar protein sorting-associated protein 35, putative        | 0,3215 | 0,00006708 |
| TcCLB.506319.10  | hypothetical protein                                            | 0,3213 | 0,00006069 |
| TcCLB.511745.20  | AAA ATPase, putative                                            | 0,3213 | 0,001091   |
| TcCLB.509733.199 | Exradiol ring-cleavage dioxygenase, putative                    | 0,3213 | 0,00296    |
| TcCLB.508851.210 | replication factor C, subunit 4, putative                       | 0,3213 | 0,03919    |
| TcCLB.507395.14  | hypothetical protein, conserved                                 | 0,3212 | 0,01367    |
| TcCLB.508919.40  | hypothetical protein, conserved                                 | 0,3211 | 0,0012     |
| TcCLB.506485.100 | hypothetical protein, conserved                                 | 0,3211 | 0,004702   |
| TcCLB.507691.31  | hypothetical protein                                            | 0,3209 | 0,08058    |
| TcCLB.504881.20  | hypothetical protein, conserved                                 | 0,3208 | 0,00004301 |
| TcCLB.508871.10  | trans-sialidase, Group V, putative                              | 0,3208 | 0,1934     |

|                  |                                                           |        |           |
|------------------|-----------------------------------------------------------|--------|-----------|
| TcCLB.510743.30  | hypothetical protein, conserved                           | 0,3207 | 0,00188   |
| TcCLB.508383.10  | Present in the outer mitochondrial membrane proteome      | 0,3207 | 0,05659   |
| TcCLB.506495.24  | hypothetical protein, conserved                           | 0,3206 | 0,04404   |
| TcCLB.511803.10  | cullin 2, putative                                        | 0,3203 | 0,01483   |
| TcCLB.503847.70  | hypothetical protein, conserved                           | 0,3202 | 0,002195  |
| TcCLB.511021.90  | hypothetical protein                                      | 0,3202 | 0,01157   |
| TcCLB.507645.30  | hypothetical protein, conserved                           | 0,3202 | 0,01327   |
| TcCLB.509777.21  | hypothetical protein                                      | 0,3202 | 0,1158    |
| TcCLB.511469.80  | hypothetical protein, conserved                           | 0,3201 | 0,005232  |
| TcCLB.509693.50  | metallo-peptidase, Clan MG, Family M24 (MetAP2)           | 0,3199 | 0,0007281 |
| TcCLB.506791.79  | hypothetical protein, conserved                           | 0,3199 | 0,02127   |
| TcCLB.511269.70  | cysteine peptidase, Clan CA, family C2, putative          | 0,3197 | 0,0601    |
| TcCLB.506167.9   | hypothetical protein, conserved                           | 0,3196 | 0,0002836 |
| TcCLB.511361.10  | kinesin-like protein (pseudogene), putative               | 0,3196 | 0,004535  |
| TcCLB.504091.10  | hypothetical protein, conserved                           | 0,3195 | 0,002195  |
| TcCLB.511277.630 | serine/threonine protein phosphatase type 5, putative     | 0,3195 | 0,003548  |
| TcCLB.508465.100 | hypothetical protein                                      | 0,3194 | 0,05226   |
| TcCLB.504099.40  | retrotransposon hot spot protein (RHS, pseudogene), puta  | 0,3194 | 0,155     |
| TcCLB.506289.40  | hypothetical protein, conserved                           | 0,3189 | 0,008542  |
| TcCLB.504205.10  | hypothetical protein                                      | 0,3189 | 0,08321   |
| TcCLB.504147.140 | hypothetical protein                                      | 0,3188 | 0,00165   |
| TcCLB.511435.20  | Replication Factor C Subunit 1-related protein            | 0,3188 | 0,006871  |
| TcCLB.507011.260 | hypothetical protein, conserved                           | 0,3187 | 0,004117  |
| TcCLB.503811.50  | hypothetical protein, conserved                           | 0,3186 | 0,004886  |
| TcCLB.506123.24  | dynein light chain, putative                              | 0,3186 | 0,03862   |
| TcCLB.511585.80  | mitochondrial-processing peptidase subunit beta, putative | 0,3183 | 0,001348  |
| TcCLB.506479.20  | hypothetical protein, conserved                           | 0,3182 | 0,01488   |
| TcCLB.506201.60  | hypothetical protein                                      | 0,3182 | 0,05865   |
| TcCLB.506221.40  | mitochondrial carrier protein, putative                   | 0,3181 | 0,01093   |
| TcCLB.507993.130 | 60S ribosomal protein L7, putative                        | 0,318  | 0,0003258 |
| TcCLB.510687.40  | serine/threonine protein phosphatase, putative            | 0,3179 | 0,001087  |
| TcCLB.509645.5   | hypothetical protein, conserved (pseudogene)              | 0,3177 | 0,01022   |
| TcCLB.511881.30  | hypothetical protein, conserved                           | 0,3175 | 0,008002  |
| TcCLB.508771.34  | hypothetical protein, conserved                           | 0,3175 | 0,1265    |
| TcCLB.504253.60  | hypothetical protein, conserved (fragment)                | 0,3174 | 0,2356    |
| TcCLB.511033.29  | hypothetical protein                                      | 0,3172 | 0,05018   |
| TcCLB.507077.9   | hypothetical protein, conserved                           | 0,3167 | 0,01325   |
| TcCLB.504255.10  | hypothetical protein, conserved                           | 0,3165 | 0,03341   |
| TcCLB.509911.130 | hypothetical protein, conserved                           | 0,3164 | 0,0005442 |
| TcCLB.510531.60  | hypothetical protein, conserved                           | 0,3164 | 0,0005846 |
| TcCLB.509539.67  | paraflagellar rod component par4, putative (fragment)     | 0,3164 | 0,1113    |
| TcCLB.511819.10  | hypothetical protein, conserved                           | 0,3163 | 0,003636  |
| TcCLB.509997.86  | serine/threonine protein phosphatase, putative (fragment) | 0,3162 | 0,001894  |
| TcCLB.506885.394 | hypothetical protein, conserved                           | 0,3162 | 0,0242    |
| TcCLB.508577.30  | retrotransposon hot spot protein (RHS, pseudogene), puta  | 0,3161 | 0,004605  |



|                  |                                                            |        |            |
|------------------|------------------------------------------------------------|--------|------------|
| TcCLB.509149.20  | zinc finger protein family member, putative (POMP35)       | 0,3161 | 0,02189    |
| TcCLB.507817.40  | hypothetical protein, conserved                            | 0,316  | 0,04811    |
| TcCLB.511773.50  | protein kinase, putative                                   | 0,3159 | 0,009725   |
| TcCLB.504881.50  | ABC transporter, putative                                  | 0,3159 | 0,08245    |
| TcCLB.510743.120 | hypothetical protein, conserved                            | 0,3158 | 0,002324   |
| TcCLB.509179.130 | hypothetical protein, conserved                            | 0,3158 | 0,0121     |
| TcCLB.510729.220 | hypothetical protein, conserved                            | 0,3157 | 0,00001448 |
| TcCLB.504827.130 | eukaryotic translation initiation factor 4 gamma, putative | 0,3157 | 0,003687   |
| TcCLB.511499.10  | hypothetical protein, conserved                            | 0,3155 | 0,001982   |
| TcCLB.509669.30  | ABC transporter, putative                                  | 0,3155 | 0,002239   |
| TcCLB.511837.20  | hypothetical protein, conserved                            | 0,3155 | 0,02112    |
| TcCLB.509217.140 | hypothetical protein, conserved (pseudogene)               | 0,3154 | 0,05026    |
| TcCLB.510435.20  | hypothetical protein, conserved                            | 0,3152 | 0,01929    |
| TcCLB.509625.20  | hypothetical protein, conserved                            | 0,3152 | 0,1485     |
| TcCLB.507077.40  | hypothetical protein, conserved                            | 0,3151 | 0,01732    |
| TcCLB.510105.70  | hypothetical protein, conserved                            | 0,3151 | 0,02421    |
| TcCLB.509795.80  | hypothetical protein, conserved                            | 0,3149 | 0,001282   |
| TcCLB.510845.10  | retrotransposon hot spot (RHS) protein, putative (fragmer  | 0,3149 | 0,06813    |
| TcCLB.510187.470 | hypothetical protein                                       | 0,3149 | 0,08338    |
| TcCLB.511807.190 | hypothetical protein, conserved                            | 0,3146 | 0,004132   |
| TcCLB.511219.20  | retrotransposon hot spot protein (RHS, pseudogene), puta   | 0,3146 | 0,02451    |
| TcCLB.511635.60  | hypothetical protein, conserved                            | 0,3144 | 0,005625   |
| TcCLB.505183.20  | malic enzyme                                               | 0,3142 | 0,0002579  |
| TcCLB.508815.80  | hypothetical protein, conserved                            | 0,314  | 0,00004521 |
| TcCLB.510441.20  | dispersed gene family protein 1 (DGF-1), putative          | 0,3139 | 0,1587     |
| TcCLB.506545.10  | hypothetical protein                                       | 0,3136 | 0,003318   |
| TcCLB.508911.80  | hypothetical protein, conserved                            | 0,3136 | 0,02442    |
| TcCLB.511809.70  | DNA primase small subunit, putative                        | 0,3136 | 0,04697    |
| TcCLB.511411.16  | hypothetical protein, conserved                            | 0,3135 | 0,002053   |
| TcCLB.510349.50  | CDP-diacylglycerol--inositol 3-phosphatidyltransferase, pu | 0,3133 | 0,05986    |
| TcCLB.511817.250 | hypothetical protein, conserved                            | 0,3131 | 0,001641   |
| TcCLB.507023.20  | hypothetical protein                                       | 0,3131 | 0,03786    |
| TcCLB.508973.80  | hypothetical protein, conserved                            | 0,3129 | 9,637E-06  |
| TcCLB.506301.40  | hypothetical protein, conserved                            | 0,3129 | 0,006104   |
| TcCLB.504109.130 | hypothetical protein, conserved                            | 0,3128 | 0,0002593  |
| TcCLB.510289.80  | hypothetical protein, conserved                            | 0,3127 | 0,0313     |
| TcCLB.506217.20  | beta galactofuranosyl glycosyltransferase (pseudogene), †  | 0,3127 | 0,09154    |
| TcCLB.511051.20  | hypothetical protein, conserved                            | 0,3126 | 0,02553    |
| TcCLB.508817.80  | protein kinase, putative                                   | 0,3125 | 0,01845    |
| TcCLB.511755.28  | hypothetical protein, conserved                            | 0,3125 | 0,1216     |
| TcCLB.482097.10  | hypothetical protein, conserved (fragment)                 | 0,3125 | 0,1976     |
| TcCLB.507641.190 | kinetoplastid kinetochore protein 1, putative (kkt1)       | 0,3124 | 0,002599   |
| TcCLB.510735.60  | hypothetical protein, conserved                            | 0,3124 | 0,04164    |
| TcCLB.506925.130 | eukaryotic initiation factor 5a, putative                  | 0,3122 | 0,02883    |
| TcCLB.506615.111 | elongation factor 1-gamma (EF-1-gamma, pseudogene), †      | 0,3122 | 0,09726    |

|                  |                                                            |        |            |
|------------------|------------------------------------------------------------|--------|------------|
| TcCLB.508153.650 | hypothetical protein, conserved (pseudogene)               | 0,312  | 0,003044   |
| TcCLB.405453.9   | dispersed gene family protein 1 (DGF-1), putative          | 0,312  | 0,1967     |
| TcCLB.506693.4   | elongation initiation factor 2 alpha subunit, putative     | 0,3115 | 0,009055   |
| TcCLB.504575.40  | adrenodoxin precursor, putative                            | 0,3114 | 0,1665     |
| TcCLB.510411.5   | retrotransposon hot spot protein (RHS, pseudogene), puta   | 0,3112 | 0,3781     |
| TcCLB.506691.22  | hypothetical protein, conserved                            | 0,3111 | 0,005004   |
| TcCLB.511465.30  | hypothetical protein, conserved                            | 0,311  | 0,06245    |
| TcCLB.509059.10  | hypothetical protein                                       | 0,311  | 0,1291     |
| TcCLB.440101.20  | activated protein kinase C receptor (pseudogene), putative | 0,311  | 0,1583     |
| TcCLB.508479.20  | hypothetical protein, conserved (pseudogene)               | 0,3107 | 0,1434     |
| TcCLB.506833.40  | hypothetical protein                                       | 0,3106 | 0,009644   |
| TcCLB.509967.80  | hypothetical protein, conserved                            | 0,3106 | 0,03035    |
| TcCLB.507023.230 | splicing factor 3a, putative                               | 0,3105 | 0,003862   |
| TcCLB.509965.120 | hypothetical protein, conserved                            | 0,3104 | 0,005673   |
| TcCLB.507087.50  | hypothetical protein, conserved                            | 0,3104 | 0,02058    |
| TcCLB.511471.20  | trans-sialidase (pseudogene), putative                     | 0,3103 | 0,131      |
| TcCLB.510697.105 | hypothetical protein, conserved (pseudogene)               | 0,3103 | 0,3271     |
| TcCLB.509027.40  | hypothetical protein, conserved                            | 0,3102 | 0,0001296  |
| TcCLB.507105.120 | hypothetical protein, conserved (pseudogene)               | 0,3102 | 0,01083    |
| TcCLB.507047.70  | hypothetical protein, conserved                            | 0,3101 | 0,0835     |
| TcCLB.507003.24  | hypothetical protein, conserved (fragment)                 | 0,3099 | 0,0001412  |
| TcCLB.510547.7   | surface protease GP63 (pseudogene), putative               | 0,3099 | 0,3756     |
| TcCLB.503969.20  | hypothetical protein, conserved                            | 0,3099 | 0,4926     |
| TcCLB.510269.55  | elongation factor 1-gamma (EF-1-gamma, pseudogene),        | 0,3098 | 0,4635     |
| TcCLB.507615.90  | hypothetical protein, conserved                            | 0,3097 | 0,00007559 |
| TcCLB.504449.40  | hypothetical protein                                       | 0,3097 | 0,009485   |
| TcCLB.506357.180 | hypothetical protein                                       | 0,3096 | 0,004088   |
| TcCLB.511415.40  | dispersed gene family protein 1 (DGF-1), putative          | 0,3095 | 0,03247    |
| TcCLB.503493.40  | hypothetical protein, conserved                            | 0,3095 | 0,453      |
| TcCLB.504159.50  | aquaporin-like protein, putative                           | 0,3094 | 0,00153    |
| TcCLB.506885.90  | hypothetical protein, conserved                            | 0,3094 | 0,001708   |
| TcCLB.505071.110 | hypothetical protein, conserved                            | 0,3092 | 0,002346   |
| TcCLB.507975.80  | hypothetical protein, conserved                            | 0,309  | 0,000235   |
| TcCLB.506205.30  | hypothetical protein, conserved                            | 0,309  | 0,0345     |
| TcCLB.510131.90  | hypothetical protein, conserved                            | 0,3087 | 0,004446   |
| TcCLB.508257.160 | hypothetical protein, conserved                            | 0,3087 | 0,005056   |
| TcCLB.511249.110 | kinesin K39 (pseudogene), putative                         | 0,3087 | 0,00831    |
| TcCLB.511171.10  | dispersed gene family protein 1 (DGF-1), putative          | 0,3086 | 0,4575     |
| TcCLB.503671.30  | Protein tilB homolog, putative (LRTP)                      | 0,3085 | 0,02998    |
| TcCLB.511741.60  | hypothetical protein, conserved                            | 0,3084 | 0,006571   |
| TcCLB.506839.70  | NADH dehydrogenase, putative                               | 0,3083 | 0,0003519  |
| TcCLB.509745.70  | hypothetical protein, conserved                            | 0,3083 | 0,003523   |
| TcCLB.508257.120 | hypothetical protein, conserved                            | 0,3083 | 0,01969    |
| TcCLB.507979.20  | hypothetical protein, conserved                            | 0,3083 | 0,02679    |
| TcCLB.508027.70  | ATP-dependent RNA helicase, putative                       | 0,308  | 0,001216   |

|                  |                                                          |        |           |
|------------------|----------------------------------------------------------|--------|-----------|
| TcCLB.510817.30  | hypothetical protein, conserved (pseudogene)             | 0,308  | 0,04687   |
| TcCLB.485889.10  | hypothetical protein, conserved                          | 0,3077 | 0,0006696 |
| TcCLB.511807.140 | hypothetical protein, conserved                          | 0,3077 | 0,002798  |
| TcCLB.507065.150 | mucin TcMUCII, putative                                  | 0,3077 | 0,2333    |
| TcCLB.509599.157 | serine/threonine protein kinase, putative                | 0,3076 | 0,009374  |
| TcCLB.511281.60  | pyruvate kinase 2, putative                              | 0,3075 | 0,01405   |
| TcCLB.509933.10  | hypothetical protein, conserved                          | 0,3074 | 0,09974   |
| TcCLB.511407.30  | hypothetical protein                                     | 0,3073 | 0,0004579 |
| TcCLB.506493.110 | hypothetical protein, conserved                          | 0,3073 | 0,07433   |
| TcCLB.510431.300 | trans-sialidase, Group II, putative                      | 0,3073 | 0,1295    |
| TcCLB.509769.134 | hypothetical protein, conserved                          | 0,3068 | 0,001367  |
| TcCLB.510519.70  | mitochondrial RNA binding complex 1 subunit, putative    | 0,3067 | 0,0091    |
| TcCLB.511391.130 | hypothetical protein, conserved                          | 0,3065 | 0,04824   |
| TcCLB.511235.31  | surface protease GP63, putative                          | 0,3064 | 0,5326    |
| TcCLB.508291.10  | mucin-associated surface protein (MASP, pseudogene), pu  | 0,3061 | 0,2683    |
| TcCLB.511287.110 | hypothetical protein, conserved                          | 0,3059 | 0,0006168 |
| TcCLB.506503.10  | hypothetical protein, conserved                          | 0,3058 | 0,02126   |
| TcCLB.506779.30  | hypothetical protein, conserved (pseudogene)             | 0,3057 | 0,0005354 |
| TcCLB.508551.10  | target of rapamycin (TOR) kinase 1, putative             | 0,3057 | 0,009532  |
| TcCLB.511507.110 | hypothetical protein, conserved (YCF45)                  | 0,3055 | 0,007814  |
| TcCLB.506475.116 | glutaredoxin, putative                                   | 0,3054 | 0,04779   |
| TcCLB.503637.30  | serine peptidase, Clan SC, Family S9B                    | 0,3053 | 0,001734  |
| TcCLB.509827.20  | hypothetical protein, conserved                          | 0,3053 | 0,07312   |
| TcCLB.509261.10  | p-nitrophenylphosphatase, putative                       | 0,3052 | 0,01337   |
| TcCLB.506465.20  | hypothetical protein, conserved                          | 0,3051 | 0,03039   |
| TcCLB.408573.9   | hypothetical protein, conserved                          | 0,3051 | 0,04134   |
| TcCLB.508369.10  | hypothetical protein, conserved                          | 0,3051 | 0,06275   |
| TcCLB.504147.30  | hypothetical protein, conserved                          | 0,305  | 0,005672  |
| TcCLB.508271.20  | hypothetical protein, conserved                          | 0,3049 | 0,01679   |
| TcCLB.508153.790 | hypothetical protein, conserved                          | 0,3049 | 0,04192   |
| TcCLB.509259.21  | elongation factor 1-gamma (EF-1-gamma, pseudogene),      | 0,3049 | 0,4594    |
| TcCLB.508919.70  | protein kinase, putative                                 | 0,3048 | 0,001401  |
| TcCLB.506145.30  | O-6 methyl-guanine alkyl transferase, putative           | 0,3047 | 0,075     |
| TcCLB.510355.97  | retrotransposon hot spot protein (RHS, pseudogene), puta | 0,3047 | 0,481     |
| TcCLB.507895.50  | dispersed gene family protein 1 (DGF-1, pseudogene), put | 0,3042 | 0,4186    |
| TcCLB.509067.30  | mitochondrial RNA binding protein, putative              | 0,3039 | 0,0008509 |
| TcCLB.510349.64  | hypothetical protein, conserved                          | 0,3038 | 0,01928   |
| TcCLB.504179.69  | phosphoprotein lepp12, putative                          | 0,3038 | 0,02563   |
| TcCLB.510659.60  | hypothetical protein, conserved                          | 0,3038 | 0,04203   |
| TcCLB.506743.135 | trans-sialidase (pseudogene), putative                   | 0,3038 | 0,1639    |
| TcCLB.508655.10  | DNA-directed RNA polymerase II subunit 2 (pseudogene),   | 0,3038 | 0,4584    |
| TcCLB.506435.430 | hypothetical protein, conserved                          | 0,3037 | 0,001814  |
| TcCLB.507623.80  | hypothetical protein, conserved                          | 0,3036 | 0,01635   |
| TcCLB.508443.30  | hypothetical protein, conserved                          | 0,3034 | 0,000373  |
| TcCLB.504433.14  | ADP-ribosylation factor-like protein 3A, putative        | 0,3028 | 0,02117   |

|                  |                                                              |        |           |
|------------------|--------------------------------------------------------------|--------|-----------|
| TcCLB.506685.5   | trans-sialidase (pseudogene), putative                       | 0,3028 | 0,04462   |
| TcCLB.511055.20  | retrotransposon hot spot (RHS) protein, putative             | 0,3027 | 0,0003393 |
| TcCLB.506821.190 | hypothetical protein, conserved                              | 0,3027 | 0,005644  |
| TcCLB.508269.70  | hypothetical protein, conserved                              | 0,3027 | 0,1719    |
| TcCLB.510657.50  | hypothetical protein, conserved                              | 0,3025 | 0,03706   |
| TcCLB.511827.70  | hypothetical protein, conserved                              | 0,3024 | 0,01831   |
| TcCLB.506177.110 | hypothetical protein, conserved                              | 0,3024 | 0,08387   |
| TcCLB.508461.160 | hypothetical protein, conserved                              | 0,3023 | 0,00191   |
| TcCLB.510687.110 | hypothetical protein, conserved                              | 0,3021 | 0,009185  |
| TcCLB.506135.70  | hypothetical protein, conserved                              | 0,3021 | 0,02147   |
| TcCLB.504047.30  | kinesin, putative                                            | 0,3019 | 0,0233    |
| TcCLB.509063.30  | chaperonin HSP60/CNP60, putative                             | 0,3018 | 0,01076   |
| TcCLB.507993.390 | pyruvate kinase 2, putative                                  | 0,3018 | 0,01991   |
| TcCLB.505097.35  | retrotransposon hot spot protein (RHS, pseudogene), puta     | 0,3017 | 0,02462   |
| TcCLB.511469.105 | hypothetical protein                                         | 0,3017 | 0,07655   |
| TcCLB.508015.20  | hypothetical protein                                         | 0,3017 | 0,1035    |
| TcCLB.508903.90  | dispersed gene family protein 1 (DGF-1, pseudogene), put     | 0,3015 | 0,0889    |
| TcCLB.511671.60  | surface antigen 2 (CA-2), putative                           | 0,3014 | 0,001974  |
| TcCLB.506803.30  | retrotransposon hot spot protein (RHS, pseudogene), puta     | 0,3014 | 0,2826    |
| TcCLB.511303.90  | hypothetical protein, conserved                              | 0,3013 | 0,003557  |
| TcCLB.504089.79  | retrotransposon hot spot protein (RHS, pseudogene), puta     | 0,3013 | 0,4097    |
| TcCLB.510679.14  | hypothetical protein, conserved                              | 0,3011 | 0,1338    |
| TcCLB.509519.9   | dispersed gene family protein 1 (DGF-1), putative (fragme    | 0,3011 | 0,5142    |
| TcCLB.508837.170 | hypothetical protein, conserved                              | 0,301  | 0,009035  |
| TcCLB.506817.70  | hypothetical protein                                         | 0,301  | 0,1986    |
| TcCLB.507951.100 | hypothetical protein, conserved                              | 0,3009 | 0,004041  |
| TcCLB.509769.33  | palmitoyl acyltransferase 12, putative                       | 0,3009 | 0,01624   |
| TcCLB.510357.110 | hypothetical protein, conserved                              | 0,3009 | 0,0373    |
| TcCLB.507977.9   | hypothetical protein, conserved (pseudogene)                 | 0,3009 | 0,06592   |
| TcCLB.506711.4   | peptide chain release factor 1, putative (fragment)          | 0,3008 | 0,1022    |
| TcCLB.504005.20  | N-Acetyl-D-glucosaminylphosphatidylinositol de-N-acetyl      | 0,3006 | 0,04777   |
| TcCLB.507013.10  | dolichol kinase, putative                                    | 0,3005 | 0,005912  |
| TcCLB.504149.20  | ATP-binding cassette transporter ABCA1, putative (ABCA1      | 0,3005 | 0,0113    |
| TcCLB.506885.489 | dispersed gene family protein 1 (DGF-1), putative            | 0,3005 | 0,1535    |
| TcCLB.506801.110 | hypothetical protein, conserved                              | 0,3003 | 0,02761   |
| TcCLB.509167.130 | hypothetical protein, conserved                              | 0,3002 | 0,001004  |
| TcCLB.507049.70  | hypothetical protein, conserved                              | 0,3    | 0,02679   |
| TcCLB.509163.100 | hypothetical protein, conserved (pseudogene)                 | 0,2998 | 0,03968   |
| TcCLB.511431.30  | conserved protein, unknown function                          | 0,2997 | 0,009624  |
| TcCLB.503397.10  | retrotransposon hot spot protein (RHS, pseudogene), puta     | 0,2994 | 0,00376   |
| TcCLB.507519.60  | Silent information regulator 2 related protein 1, putative ( | 0,2992 | 0,01676   |
| TcCLB.510463.230 | dispersed gene family protein 1 (DGF-1), putative            | 0,2992 | 0,385     |
| TcCLB.511237.100 | hypothetical protein, conserved                              | 0,2991 | 0,006239  |
| TcCLB.509717.60  | metallo-peptidase, Clan MA(E) Family M41                     | 0,299  | 0,001933  |
| TcCLB.506705.40  | hypothetical protein, conserved                              | 0,299  | 0,007705  |

|                  |                                                                |        |            |
|------------------|----------------------------------------------------------------|--------|------------|
| TcCLB.510329.120 | Present in the outer mitochondrial membrane proteome $\bar{z}$ | 0,299  | 0,01027    |
| TcCLB.509065.110 | hypothetical protein, conserved                                | 0,2989 | 0,002063   |
| TcCLB.417091.10  | RNA pseudouridylate synthase, putative                         | 0,2989 | 0,08168    |
| TcCLB.507063.30  | hypothetical protein, conserved                                | 0,2987 | 0,04127    |
| TcCLB.507745.10  | mucin-associated surface protein (MASP, pseudogene), pu        | 0,2987 | 0,2475     |
| TcCLB.507951.179 | hypothetical protein, conserved                                | 0,2986 | 0,008212   |
| TcCLB.506559.400 | hypothetical protein, conserved                                | 0,2986 | 0,01853    |
| TcCLB.507575.10  | dispersed gene family protein 1 (DGF-1), putative              | 0,2986 | 0,2893     |
| TcCLB.509317.109 | hypothetical protein, conserved (fragment)                     | 0,2984 | 0,0102     |
| TcCLB.510649.24  | membrane associated protein, putative (fragment)               | 0,2982 | 0,002183   |
| TcCLB.507213.30  | potassium voltage-gated channel, putative                      | 0,2981 | 0,004203   |
| TcCLB.510101.70  | protein transport protein SEC61 subunit alpha, putative        | 0,298  | 0,0008648  |
| TcCLB.511419.10  | hypothetical protein                                           | 0,298  | 0,07829    |
| TcCLB.508797.29  | hypothetical protein, conserved                                | 0,2978 | 0,0004595  |
| TcCLB.508257.104 | ribosomal protein L14, putative                                | 0,2976 | 0,06856    |
| TcCLB.509161.149 | hypothetical protein, conserved                                | 0,2976 | 0,1289     |
| TcCLB.508297.61  | choline ethanolamine kinase, putative                          | 0,2976 | 0,138      |
| TcCLB.510877.170 | hypothetical protein, conserved                                | 0,2975 | 0,001211   |
| TcCLB.510353.20  | hypothetical protein, conserved                                | 0,2975 | 0,006255   |
| TcCLB.510039.109 | sec1 family transport protein, putative (fragment)             | 0,2975 | 0,08241    |
| TcCLB.506629.70  | cysteine desulfurase, putative                                 | 0,2974 | 0,01032    |
| TcCLB.507943.99  | hypothetical protein, conserved (fragment)                     | 0,2974 | 0,179      |
| TcCLB.507681.70  | hypothetical protein, conserved                                | 0,2973 | 0,00458    |
| TcCLB.509205.20  | hypothetical protein, conserved                                | 0,2973 | 0,04267    |
| TcCLB.504637.21  | trans-sialidase (pseudogene), putative                         | 0,2973 | 0,06415    |
| TcCLB.508543.80  | hypothetical protein, conserved                                | 0,2972 | 0,04433    |
| TcCLB.511361.60  | hypothetical protein                                           | 0,2971 | 0,005444   |
| TcCLB.508871.20  | mucin TcMUCII, putative                                        | 0,2971 | 0,5185     |
| TcCLB.510735.20  | hypothetical protein, conserved                                | 0,297  | 0,01135    |
| TcCLB.506393.143 | ATP-dependent DEAD/H RNA helicase (pseudogene), puta           | 0,297  | 0,2203     |
| TcCLB.510627.200 | trans-sialidase (pseudogene), putative                         | 0,2967 | 0,603      |
| TcCLB.511907.80  | beta-ketoacyl-ACP reductase 2, putative                        | 0,2966 | 0,02735    |
| TcCLB.505163.40  | hypothetical protein, conserved                                | 0,2964 | 0,04361    |
| TcCLB.511025.70  | chaperonin alpha subunit, putative                             | 0,2962 | 0,00003436 |
| TcCLB.509213.40  | hypothetical protein, conserved                                | 0,2961 | 0,0003833  |
| TcCLB.508657.20  | sec1-like protein (pseudogene), putative                       | 0,296  | 0,008734   |
| TcCLB.511529.20  | hypothetical protein, conserved                                | 0,296  | 0,02655    |
| TcCLB.511717.70  | hypothetical protein, conserved                                | 0,2959 | 0,01784    |
| TcCLB.508207.10  | glycine dehydrogenase (pseudogene), putative                   | 0,2959 | 0,01935    |
| TcCLB.511595.10  | trans-sialidase (pseudogene), putative                         | 0,2959 | 0,381      |
| TcCLB.508369.50  | acetyl-CoA carboxylase (fragment)                              | 0,2957 | 0,0004004  |
| TcCLB.506227.90  | hypothetical protein, conserved                                | 0,2957 | 0,01631    |
| TcCLB.504057.45  | hypothetical protein, conserved                                | 0,2956 | 0,006461   |
| TcCLB.509895.100 | hypothetical protein, conserved                                | 0,2956 | 0,02523    |
| TcCLB.506327.20  | hypothetical protein, conserved                                | 0,2956 | 0,03271    |

|                  |                                                          |        |           |
|------------------|----------------------------------------------------------|--------|-----------|
| TcCLB.507969.70  | hypothetical protein, conserved                          | 0,2955 | 0,05786   |
| TcCLB.504155.30  | retrotransposon hot spot protein (RHS, pseudogene), puta | 0,2955 | 0,4045    |
| TcCLB.511385.90  | hypothetical protein, conserved                          | 0,2954 | 0,0009318 |
| TcCLB.508351.10  | fructose-1,6-bisphosphatase, cytosolic, putative         | 0,2954 | 0,01506   |
| TcCLB.509753.126 | hypothetical protein, conserved (pseudogene)             | 0,2951 | 0,3268    |
| TcCLB.509057.20  | importin alpha, putative                                 | 0,2946 | 0,0002878 |
| TcCLB.506725.30  | hypothetical protein, conserved                          | 0,2946 | 0,0002978 |
| TcCLB.506679.180 | hypothetical protein, conserved                          | 0,2945 | 0,00284   |
| TcCLB.511015.10  | mannosyl-oligosaccharide glucosidase, putative           | 0,2945 | 0,04301   |
| TcCLB.510137.40  | retrotransposon hot spot protein (RHS, pseudogene), puta | 0,2944 | 0,005458  |
| TcCLB.503441.10  | retrotransposon hot spot protein (RHS, pseudogene), puta | 0,2944 | 0,006482  |
| TcCLB.509297.20  | hypothetical protein, conserved                          | 0,2942 | 0,007406  |
| TcCLB.509017.9   | hypothetical protein, conserved (fragment)               | 0,2941 | 0,06481   |
| TcCLB.507519.10  | hypothetical protein, conserved (pseudogene)             | 0,294  | 0,01882   |
| TcCLB.508411.70  | hypothetical protein, conserved                          | 0,2939 | 0,02982   |
| TcCLB.510175.60  | dispersed gene family protein 1 (DGF-1), putative        | 0,2939 | 0,05782   |
| TcCLB.507771.99  | hypothetical protein, conserved                          | 0,2939 | 0,1073    |
| TcCLB.506527.10  | hypothetical protein, conserved                          | 0,2937 | 0,0002575 |
| TcCLB.508115.10  | hypothetical protein                                     | 0,2936 | 0,2265    |
| TcCLB.511153.110 | hypothetical protein, conserved                          | 0,2934 | 0,0007568 |
| TcCLB.511627.80  | hypothetical protein, conserved                          | 0,2934 | 0,1278    |
| TcCLB.508215.10  | hypothetical protein, conserved                          | 0,2932 | 0,01635   |
| TcCLB.503973.31  | hypothetical protein, conserved (pseudogene)             | 0,293  | 0,1554    |
| TcCLB.510399.39  | dispersed gene family protein 1 (DGF-1), putative        | 0,293  | 0,2944    |
| TcCLB.436761.10  | hypothetical protein, conserved                          | 0,2929 | 0,07682   |
| TcCLB.420091.10  | dispersed gene family protein 1 (DGF-1), putative        | 0,2929 | 0,2034    |
| TcCLB.507711.320 | DNA mismatch repair protein MSH2, putative (MSH2)        | 0,2928 | 0,00062   |
| TcCLB.509437.40  | heat shock protein DNAJ, putative                        | 0,2928 | 0,0008448 |
| TcCLB.415803.10  | hypothetical protein, conserved                          | 0,2928 | 0,09974   |
| TcCLB.506779.110 | phosphatase, putative                                    | 0,2925 | 0,001151  |
| TcCLB.504179.40  | hypothetical protein, conserved                          | 0,2925 | 0,001345  |
| TcCLB.508541.225 | casein kinase, putative                                  | 0,2925 | 0,01514   |
| TcCLB.510761.80  | surface protease GP63, putative                          | 0,2925 | 0,2444    |
| TcCLB.510289.54  | hypothetical protein, conserved                          | 0,2924 | 0,06146   |
| TcCLB.510731.68  | hypothetical protein, conserved                          | 0,2923 | 0,06891   |
| TcCLB.507793.10  | hypothetical protein, conserved                          | 0,2922 | 0,000411  |
| TcCLB.507765.80  | hypothetical protein, conserved                          | 0,2922 | 0,01096   |
| TcCLB.506699.3   | hypothetical protein, conserved                          | 0,2922 | 0,05183   |
| TcCLB.511739.30  | hypothetical protein, conserved                          | 0,292  | 0,05095   |
| TcCLB.509225.21  | hypothetical protein                                     | 0,292  | 0,2224    |
| TcCLB.506503.120 | hypothetical protein, conserved                          | 0,2919 | 0,0001631 |
| TcCLB.508503.80  | hypothetical protein                                     | 0,2918 | 0,04991   |
| TcCLB.509831.10  | cysteine desulfurase, putative                           | 0,2916 | 0,0114    |
| TcCLB.508163.240 | hypothetical protein                                     | 0,2916 | 0,4795    |
| TcCLB.508085.10  | GMP synthase, putative                                   | 0,2915 | 0,007397  |

|                  |                                                          |        |           |
|------------------|----------------------------------------------------------|--------|-----------|
| TcCLB.509967.10  | hypothetical protein, conserved                          | 0,2915 | 0,02849   |
| TcCLB.509003.10  | hypothetical protein, conserved                          | 0,2914 | 0,0009904 |
| TcCLB.503919.40  | hypothetical protein, conserved                          | 0,2913 | 0,001529  |
| TcCLB.510321.20  | hypothetical protein, conserved                          | 0,2913 | 0,01761   |
| TcCLB.508859.118 | trans-sialidase, putative                                | 0,2913 | 0,09213   |
| TcCLB.506367.130 | hypothetical protein, conserved                          | 0,2912 | 0,004852  |
| TcCLB.510855.4   | hypothetical protein, conserved                          | 0,2912 | 0,01932   |
| TcCLB.509733.185 | hypothetical protein, conserved (pseudogene)             | 0,2909 | 0,01879   |
| TcCLB.506821.200 | hypothetical protein, conserved                          | 0,2907 | 0,01073   |
| TcCLB.509599.50  | hypothetical protein, conserved                          | 0,2906 | 0,004515  |
| TcCLB.511725.230 | protein kinase, putative                                 | 0,2905 | 0,0003396 |
| TcCLB.506493.60  | hypothetical protein, conserved                          | 0,2905 | 0,004276  |
| TcCLB.507509.40  | hypothetical protein, conserved                          | 0,2905 | 0,006716  |
| TcCLB.506719.10  | phosphatidylinositol (3,5) kinase, putative              | 0,2905 | 0,02382   |
| TcCLB.507009.110 | hypothetical protein, conserved                          | 0,2905 | 0,04218   |
| TcCLB.508989.120 | hypothetical protein, conserved                          | 0,2904 | 0,02546   |
| TcCLB.508231.74  | poly(A)-specific ribonuclease PARN, putative             | 0,2904 | 0,06584   |
| TcCLB.508613.30  | peroxisomal membrane protein 4, putative                 | 0,2903 | 0,0404    |
| TcCLB.511231.30  | hypothetical protein, conserved                          | 0,2902 | 0,01126   |
| TcCLB.510029.50  | hypothetical protein, conserved                          | 0,2902 | 0,01205   |
| TcCLB.511589.250 | hypothetical protein, conserved                          | 0,2902 | 0,02745   |
| TcCLB.505171.80  | hypothetical protein, conserved                          | 0,2901 | 0,002962  |
| TcCLB.506339.100 | dispersed gene family protein 1 (DGF-1), putative        | 0,2901 | 0,1588    |
| TcCLB.506435.250 | hypothetical protein, conserved                          | 0,2899 | 0,06153   |
| TcCLB.506287.9   | hypothetical protein, conserved                          | 0,2897 | 0,02258   |
| TcCLB.509003.79  | coatomer beta subunit, putative (fragment)               | 0,2895 | 0,01585   |
| TcCLB.507609.150 | hypothetical protein (pseudogene)                        | 0,2895 | 0,2467    |
| TcCLB.510741.210 | glycerol kinase, glycosomal (pseudogene), putative       | 0,2894 | 0,0101    |
| TcCLB.508659.9   | TPR-repeat-containing chaperone protein DNAJ, putative ( | 0,2893 | 0,02109   |
| TcCLB.509831.20  | vesicular-fusion ATPase-like protein, putative           | 0,2892 | 0,002145  |
| TcCLB.504137.150 | hypothetical protein, conserved                          | 0,289  | 0,002298  |
| TcCLB.511577.90  | pseudouridylate synthase-like protein, putative          | 0,2887 | 0,009183  |
| TcCLB.511571.10  | ATP-dependent DEAD/H RNA helicase, putative              | 0,2885 | 0,1738    |
| TcCLB.508193.15  | trans-sialidase (pseudogene), putative                   | 0,2884 | 0,003218  |
| TcCLB.506211.100 | Sarcalumenin, putative                                   | 0,2884 | 0,007016  |
| TcCLB.510047.10  | hypothetical protein, conserved                          | 0,2883 | 0,005423  |
| TcCLB.508577.40  | dispersed gene family protein 1 (DGF-1), putative        | 0,2882 | 0,08414   |
| TcCLB.511671.130 | hypothetical protein, conserved                          | 0,2881 | 0,004865  |
| TcCLB.508451.10  | trans-sialidase (pseudogene), putative                   | 0,2881 | 0,1143    |
| TcCLB.509721.10  | MRB1 complex subunit MRB3010 (MRB3010)                   | 0,288  | 0,06052   |
| TcCLB.507681.200 | serine carboxypeptidase S28, putative                    | 0,2879 | 0,005156  |
| TcCLB.511459.50  | hypothetical protein, conserved                          | 0,2879 | 0,0646    |
| TcCLB.510431.210 | vesicular protein trafficking mediator, putative         | 0,2878 | 0,01863   |
| TcCLB.508689.20  | hypothetical protein, conserved                          | 0,2876 | 0,004853  |
| TcCLB.508911.20  | hypothetical protein, conserved                          | 0,2876 | 0,0414    |

|                  |                                                          |        |           |
|------------------|----------------------------------------------------------|--------|-----------|
| TcCLB.504035.80  | hypothetical protein, conserved                          | 0,2873 | 0,1443    |
| TcCLB.510967.30  | hypothetical protein                                     | 0,2872 | 0,1593    |
| TcCLB.507795.10  | membrane associated protein, putative                    | 0,2871 | 0,002786  |
| TcCLB.510947.20  | hypothetical protein, conserved                          | 0,2868 | 0,003723  |
| TcCLB.506683.240 | trans-sialidase, Group II, putative                      | 0,2867 | 0,005718  |
| TcCLB.508239.20  | hypothetical protein, conserved                          | 0,2866 | 0,0009807 |
| TcCLB.511055.10  | retrotransposon hot spot protein (RHS, pseudogene), puta | 0,2866 | 0,005433  |
| TcCLB.511529.180 | hypothetical protein, conserved                          | 0,2865 | 0,01194   |
| TcCLB.509779.40  | hypothetical protein, conserved                          | 0,2865 | 0,04891   |
| TcCLB.508175.39  | hypothetical protein, conserved                          | 0,2864 | 0,04038   |
| TcCLB.507007.34  | hypothetical protein, conserved                          | 0,2863 | 0,002868  |
| TcCLB.506221.100 | hypothetical protein, conserved                          | 0,2862 | 0,01229   |
| TcCLB.511303.30  | hypothetical protein, conserved                          | 0,2862 | 0,01522   |
| TcCLB.510449.20  | hypothetical protein, conserved (pseudogene)             | 0,2861 | 0,4805    |
| TcCLB.509877.60  | hypothetical protein, conserved                          | 0,286  | 0,008573  |
| TcCLB.510311.150 | mitochondrial protein 99, putative (MP99)                | 0,286  | 0,01079   |
| TcCLB.508153.880 | hypothetical protein, conserved                          | 0,2859 | 0,003828  |
| TcCLB.510329.380 | hypothetical protein, conserved                          | 0,2859 | 0,03712   |
| TcCLB.510359.320 | DNA-directed RNA polymerase III subunit, putative        | 0,2858 | 0,1735    |
| TcCLB.509177.30  | hypothetical protein, conserved                          | 0,2857 | 0,00314   |
| TcCLB.511081.71  | hypothetical protein, conserved (pseudogene)             | 0,2857 | 0,4179    |
| TcCLB.509561.30  | citrate transporter, putative                            | 0,2855 | 0,02322   |
| TcCLB.510949.10  | dual specificity protein phosphatase, putative           | 0,2854 | 0,01594   |
| TcCLB.420719.9   | Associated kinase of Tb14-3-3, putative (AKB1)           | 0,2853 | 0,03611   |
| TcCLB.507485.50  | hypothetical protein, conserved                          | 0,2852 | 0,005822  |
| TcCLB.506113.80  | hypothetical protein, conserved (pseudogene)             | 0,2851 | 0,01237   |
| TcCLB.508815.140 | protein transport protein SEC13, putative                | 0,285  | 0,01728   |
| TcCLB.506425.169 | Ras-related protein RAB2B, putative (fragment) (RAB2B)   | 0,285  | 0,08897   |
| TcCLB.504033.40  | hypothetical protein                                     | 0,2849 | 0,0018    |
| TcCLB.508349.39  | RNA-binding protein, putative (fragment) (DRBD3)         | 0,2849 | 0,00775   |
| TcCLB.509715.60  | hypothetical protein, conserved                          | 0,2849 | 0,05807   |
| TcCLB.511321.10  | FG-GAP repeat protein, putative                          | 0,2848 | 0,0007678 |
| TcCLB.509769.110 | Elongator-like Protein 3b, putative                      | 0,2848 | 0,001044  |
| TcCLB.511483.40  | prefoldin subunit 2, putative                            | 0,2848 | 0,02297   |
| TcCLB.506733.110 | hypothetical protein, conserved                          | 0,2848 | 0,07824   |
| TcCLB.510053.79  | FG-GAP repeat protein, putative                          | 0,2847 | 0,129     |
| TcCLB.507809.60  | hypothetical protein, conserved                          | 0,2846 | 0,004265  |
| TcCLB.503579.140 | hypothetical protein, conserved                          | 0,2845 | 0,01813   |
| TcCLB.506315.20  | hypothetical protein, conserved                          | 0,2844 | 0,02915   |
| TcCLB.510289.10  | hypothetical protein, conserved                          | 0,2844 | 0,06903   |
| TcCLB.509237.50  | hypothetical protein, conserved                          | 0,2842 | 0,001285  |
| TcCLB.506863.4   | dephospho-CoA kinase, putative                           | 0,2842 | 0,2519    |
| TcCLB.510841.20  | hypothetical protein, conserved                          | 0,2841 | 0,06131   |
| TcCLB.511867.190 | tubulin gamma chain (TUBG)                               | 0,284  | 0,003626  |
| TcCLB.503917.7   | RNA-binding protein, putative                            | 0,284  | 0,01284   |



|                  |                                                              |        |            |
|------------------|--------------------------------------------------------------|--------|------------|
| TcCLB.510381.20  | ABC transporter, putative                                    | 0,284  | 0,02409    |
| TcCLB.511315.20  | hypothetical protein, conserved                              | 0,2839 | 0,01053    |
| TcCLB.504149.130 | hypothetical protein, conserved                              | 0,2834 | 0,0002636  |
| TcCLB.504153.129 | hypothetical protein, conserved                              | 0,2834 | 0,007316   |
| TcCLB.508039.10  | retrotransposon hot spot protein (RHS, pseudogene), puta     | 0,2833 | 0,007892   |
| TcCLB.510565.130 | hypothetical protein                                         | 0,2832 | 0,01346    |
| TcCLB.504147.70  | hypothetical protein, conserved                              | 0,2832 | 0,02728    |
| TcCLB.506961.20  | dispersed gene family protein 1 (DGF-1), putative            | 0,2831 | 0,3075     |
| TcCLB.510719.270 | hypothetical protein, conserved                              | 0,2829 | 0,07498    |
| TcCLB.510175.150 | hypothetical protein, conserved                              | 0,2828 | 0,1729     |
| TcCLB.508479.480 | N-acetyltransferase complex ARD1 subunit (pseudogene),       | 0,2827 | 0,1698     |
| TcCLB.511585.280 | retrotransposon hot spot protein (RHS, pseudogene), puta     | 0,2826 | 0,01959    |
| TcCLB.504427.120 | hypothetical protein, conserved                              | 0,2826 | 0,02324    |
| TcCLB.507155.9   | dispersed gene family protein 1 (DGF-1, pseudogene), put     | 0,2826 | 0,1914     |
| TcCLB.509507.49  | mitotic cyclin, putative                                     | 0,2825 | 0,06383    |
| TcCLB.510575.239 | hypothetical protein, conserved                              | 0,2824 | 0,3636     |
| TcCLB.511423.40  | TFIIH basal transcription factor subunit, putative (TSP1)    | 0,2823 | 0,0274     |
| TcCLB.506863.10  | alanyl-tRNA synthetase, putative                             | 0,2822 | 0,00004744 |
| TcCLB.504149.30  | hypothetical protein, conserved                              | 0,2822 | 0,01855    |
| TcCLB.508139.20  | dispersed gene family protein 1 (DGF-1), putative            | 0,2821 | 0,0487     |
| TcCLB.507993.100 | hypothetical protein, conserved                              | 0,282  | 0,1029     |
| TcCLB.508131.10  | hypothetical protein, conserved (pseudogene)                 | 0,2819 | 0,001554   |
| TcCLB.507105.20  | mitochondrial RNA binding complex 1 subunit, putative        | 0,2819 | 0,03138    |
| TcCLB.511445.90  | hypothetical protein, conserved                              | 0,2818 | 0,001484   |
| TcCLB.511581.20  | fatty acyl CoA syntetase 1                                   | 0,2818 | 0,01465    |
| TcCLB.504021.40  | hypothetical protein, conserved                              | 0,2817 | 0,003881   |
| TcCLB.504167.40  | ubiquitin fusion degradation protein, putative               | 0,2816 | 0,02501    |
| TcCLB.421619.10  | hypothetical protein                                         | 0,2815 | 0,01314    |
| TcCLB.508903.30  | retrotransposon hot spot protein (RHS, pseudogene), puta     | 0,2815 | 0,06638    |
| TcCLB.411337.10  | retrotransposon hot spot protein (RHS, pseudogene), puta     | 0,2812 | 0,1037     |
| TcCLB.506587.60  | target SNARE, putative                                       | 0,2811 | 0,02668    |
| TcCLB.504153.170 | hypothetical protein, conserved                              | 0,281  | 0,000039   |
| TcCLB.506179.10  | ferric reductase transmembrane protein, putative (FR1)       | 0,2809 | 0,00007882 |
| TcCLB.506631.50  | hypothetical protein, conserved (fragment)                   | 0,2809 | 0,5047     |
| TcCLB.510287.30  | proteasome subunit beta type-2, putative                     | 0,2808 | 0,01214    |
| TcCLB.505965.80  | hypothetical protein, conserved                              | 0,2808 | 0,04708    |
| TcCLB.509769.100 | hypothetical protein, conserved                              | 0,2807 | 0,01789    |
| TcCLB.511713.30  | hypothetical protein, conserved                              | 0,2806 | 0,03561    |
| TcCLB.506893.25  | U6 snRNA-associated Sm-like protein LSm6p                    | 0,2806 | 0,3398     |
| TcCLB.508207.150 | Silent information regulator 2 related protein 1, putative ( | 0,2805 | 0,01817    |
| TcCLB.507517.120 | hypothetical protein, conserved                              | 0,2805 | 0,04749    |
| TcCLB.507025.30  | hypothetical protein, conserved                              | 0,2805 | 0,06816    |
| TcCLB.506155.40  | hypothetical protein, conserved                              | 0,2803 | 0,002451   |
| TcCLB.510307.320 | retrotransposon hot spot protein (RHS, pseudogene), puta     | 0,2803 | 0,03543    |
| TcCLB.511837.120 | hypothetical protein, conserved                              | 0,2803 | 0,2308     |

|                  |                                                             |        |            |
|------------------|-------------------------------------------------------------|--------|------------|
| TcCLB.510411.30  | retrotransposon hot spot protein (RHS, pseudogene), puta    | 0,2802 | 0,1509     |
| TcCLB.507643.15  | beta galactofuranosyl glycosyltransferase, putative (fragn  | 0,2802 | 0,2075     |
| TcCLB.510699.100 | hypothetical protein                                        | 0,28   | 0,3951     |
| TcCLB.507711.10  | intraflagellar transport protein 57/55, putative (IFT57/55) | 0,2798 | 0,01106    |
| TcCLB.506211.210 | mitogen-activated protein kinase kinase kinase, putative (  | 0,2796 | 0,003091   |
| TcCLB.511511.10  | endosomal trafficking protein RME-8, putative               | 0,2795 | 0,005932   |
| TcCLB.506405.70  | hypothetical protein, conserved                             | 0,2795 | 0,04812    |
| TcCLB.511215.10  | hypothetical protein, conserved                             | 0,2791 | 0,03023    |
| TcCLB.511211.110 | hypothetical protein, conserved                             | 0,279  | 0,003291   |
| TcCLB.507811.120 | myosin heavy chain MYA2-related, putative                   | 0,279  | 0,008963   |
| TcCLB.508039.90  | phosphoinositide-specific phospholipase C (pseudogene),     | 0,279  | 0,04578    |
| TcCLB.510121.140 | hypothetical protein, conserved                             | 0,2786 | 0,01197    |
| TcCLB.510349.40  | hypothetical protein, conserved                             | 0,2785 | 0,0009036  |
| TcCLB.507547.40  | enoyl-CoA hydratase/Enoyl-CoA isomerase/3-hydroxyacyl-      | 0,2784 | 0,007136   |
| TcCLB.507993.250 | hypothetical protein, conserved                             | 0,2784 | 0,01013    |
| TcCLB.511649.140 | hypothetical protein, conserved                             | 0,2784 | 0,05057    |
| TcCLB.508717.10  | tyrosine specific protein phosphatase, putative             | 0,2783 | 0,004697   |
| TcCLB.509733.95  | hypothetical protein                                        | 0,2782 | 0,009293   |
| TcCLB.511577.80  | hypothetical protein, conserved                             | 0,2781 | 0,009536   |
| TcCLB.507389.60  | chaperone DNAJ protein, putative                            | 0,2781 | 0,1411     |
| TcCLB.509073.110 | hypothetical protein, conserved                             | 0,278  | 0,003323   |
| TcCLB.503581.30  | hypothetical protein, conserved                             | 0,278  | 0,1298     |
| TcCLB.509551.110 | hypothetical protein, conserved                             | 0,2779 | 0,007704   |
| TcCLB.503653.30  | ribosomal RNA processing protein 41B, putative (RRP41B)     | 0,2779 | 0,03112    |
| TcCLB.511189.84  | hypothetical protein, conserved                             | 0,2777 | 0,06777    |
| TcCLB.506895.50  | hypothetical protein, conserved                             | 0,2776 | 0,0317     |
| TcCLB.452039.9   | hypothetical protein, conserved                             | 0,2775 | 0,002333   |
| TcCLB.508737.170 | hypothetical protein, conserved                             | 0,2775 | 0,02673    |
| TcCLB.506943.110 | hypothetical protein                                        | 0,2773 | 0,09361    |
| TcCLB.511233.40  | hypothetical protein, conserved                             | 0,2772 | 0,004251   |
| TcCLB.504231.30  | hypothetical protein, conserved                             | 0,2771 | 0,007658   |
| TcCLB.511139.30  | hypothetical protein, conserved                             | 0,2771 | 0,02111    |
| TcCLB.506775.190 | serine/threonine protein kinase, putative                   | 0,277  | 0,11       |
| TcCLB.508381.40  | retrotransposon hot spot protein (RHS, pseudogene), puta    | 0,2769 | 0,1709     |
| TcCLB.508067.10  | hypothetical protein, conserved                             | 0,2768 | 0,00002568 |
| TcCLB.508241.90  | hypothetical protein, conserved                             | 0,2768 | 0,00191    |
| TcCLB.511649.60  | COP9 signalosome complex subunit 5, putative                | 0,2767 | 0,006968   |
| TcCLB.507507.30  | hypothetical protein, conserved                             | 0,2766 | 0,01855    |
| TcCLB.509591.40  | hypothetical protein, conserved                             | 0,2765 | 0,001056   |
| TcCLB.510537.68  | syntaxin binding protein (pseudogene), putative             | 0,2765 | 0,5505     |
| TcCLB.509541.10  | hypothetical protein, conserved                             | 0,2764 | 0,002797   |
| TcCLB.508153.640 | IAG-nucleoside hydrolase, putative (IAGNH)                  | 0,2763 | 0,0009155  |
| TcCLB.508787.30  | pumilio/PUF RNA binding protein 3, putative (PUF3)          | 0,2763 | 0,006316   |
| TcCLB.506303.140 | hypothetical protein, conserved                             | 0,2761 | 0,008788   |
| TcCLB.509429.140 | kinetoplastid kinetochore protein 6, putative (kkt6)        | 0,2761 | 0,06164    |

|                  |                                                          |        |          |
|------------------|----------------------------------------------------------|--------|----------|
| TcCLB.511751.22  | hypothetical protein, conserved                          | 0,2761 | 0,1369   |
| TcCLB.472777.9   | hypothetical protein, conserved                          | 0,2761 | 0,2937   |
| TcCLB.506503.150 | histone H3 variant, putative                             | 0,276  | 0,01196  |
| TcCLB.508163.40  | mucin TcMUCII (pseudogene), putative                     | 0,2754 | 0,4604   |
| TcCLB.511897.28  | hypothetical protein, conserved                          | 0,2752 | 0,06733  |
| TcCLB.511541.20  | hypothetical protein                                     | 0,2751 | 0,01267  |
| TcCLB.510851.40  | trans-sialidase (pseudogene), putative                   | 0,275  | 0,08046  |
| TcCLB.510101.310 | hypothetical protein                                     | 0,2749 | 0,002881 |
| TcCLB.504125.90  | protein kinase, putative                                 | 0,2749 | 0,005444 |
| TcCLB.506577.30  | hypothetical protein, conserved                          | 0,2749 | 0,01319  |
| TcCLB.510469.30  | trans-sialidase (pseudogene), putative                   | 0,2748 | 0,4554   |
| TcCLB.510241.120 | Peptide deformylase 2, putative (PDF2)                   | 0,2747 | 0,01868  |
| TcCLB.509647.120 | hypothetical protein                                     | 0,2747 | 0,02273  |
| TcCLB.508897.40  | hypothetical protein, conserved                          | 0,2746 | 0,002479 |
| TcCLB.511277.570 | 60S ribosomal protein L7, putative                       | 0,2742 | 0,01563  |
| TcCLB.503919.30  | hypothetical protein, conserved                          | 0,2742 | 0,05765  |
| TcCLB.508137.30  | ubiquitin-conjugating enzyme E2, putative                | 0,2737 | 0,04408  |
| TcCLB.507817.9   | histone H3, putative                                     | 0,2736 | 0,149    |
| TcCLB.508707.224 | tubulin binding cofactor A-like protein, putative        | 0,2735 | 0,09474  |
| TcCLB.509065.140 | hypothetical protein, conserved                          | 0,2733 | 0,08538  |
| TcCLB.509755.60  | hypothetical protein, conserved (pseudogene)             | 0,2732 | 0,3585   |
| TcCLB.506223.80  | Metalloprotease M41 FtsH, putative                       | 0,273  | 0,002023 |
| TcCLB.504045.20  | hypothetical protein, conserved                          | 0,273  | 0,003711 |
| TcCLB.506575.70  | Present in the outer mitochondrial membrane proteome 4   | 0,2728 | 0,006753 |
| TcCLB.507029.20  | DNA-J protein, putative                                  | 0,2728 | 0,02941  |
| TcCLB.511741.40  | RNA-binding protein, putative                            | 0,2727 | 0,01501  |
| TcCLB.511245.100 | hypothetical protein, conserved                          | 0,2727 | 0,0203   |
| TcCLB.510593.40  | kinetoplastid kinetochore protein 8, putative (kkt8)     | 0,2726 | 0,01722  |
| TcCLB.509777.4   | ribosomal protein L2, putative                           | 0,2726 | 0,03452  |
| TcCLB.509825.20  | hypothetical protein, conserved                          | 0,2726 | 0,06143  |
| TcCLB.510687.50  | hypothetical protein, conserved                          | 0,2725 | 0,00692  |
| TcCLB.507669.80  | protein phosphatase, putative                            | 0,2724 | 0,002487 |
| TcCLB.509543.20  | hypothetical protein, conserved                          | 0,2724 | 0,02927  |
| TcCLB.511523.40  | hypothetical protein, conserved                          | 0,2722 | 0,04521  |
| TcCLB.506893.90  | hypothetical protein, conserved                          | 0,2722 | 0,1341   |
| TcCLB.510651.10  | hypothetical protein, conserved                          | 0,2722 | 0,1735   |
| TcCLB.507089.40  | CMP-sialic acid transporter, putative                    | 0,2721 | 0,04943  |
| TcCLB.510687.140 | alkylated DNA repair protein, putative                   | 0,272  | 0,0229   |
| TcCLB.505267.100 | retrotransposon hot spot protein (RHS, pseudogene), puta | 0,2719 | 0,02209  |
| TcCLB.508461.420 | 30S Ribosomal protein S17, putative                      | 0,2718 | 0,01425  |
| TcCLB.508543.100 | hypothetical protein, conserved                          | 0,2717 | 0,001213 |
| TcCLB.511189.80  | small nuclear ribonucleoprotein SmD2, putative           | 0,2717 | 0,01945  |
| TcCLB.511851.10  | dispersed gene family protein 1 (DGF-1), putative        | 0,2717 | 0,09055  |
| TcCLB.506425.10  | serine carboxypeptidase S28, putative                    | 0,2714 | 0,03173  |
| TcCLB.511529.120 | hypothetical protein, conserved                          | 0,2714 | 0,06843  |

|                  |                                                            |        |           |
|------------------|------------------------------------------------------------|--------|-----------|
| TcCLB.509635.9   | hypothetical protein, conserved                            | 0,2713 | 0,04318   |
| TcCLB.504141.31  | hypothetical protein, conserved (pseudogene)               | 0,2712 | 0,1889    |
| TcCLB.507023.50  | hypothetical protein, conserved                            | 0,2707 | 0,02061   |
| TcCLB.508781.80  | hypothetical protein, conserved                            | 0,2706 | 0,01099   |
| TcCLB.509461.20  | hypothetical protein, conserved                            | 0,2704 | 0,04594   |
| TcCLB.508469.50  | hypothetical protein, conserved (pseudogene)               | 0,2702 | 0,02068   |
| TcCLB.511903.220 | hypothetical protein, conserved                            | 0,27   | 0,003243  |
| TcCLB.503727.10  | centrin, putative                                          | 0,2699 | 0,02253   |
| TcCLB.509157.80  | DnaJ homolog, putative                                     | 0,2699 | 0,0551    |
| TcCLB.507641.80  | 5'-3' exoribonuclease D, putative (XRND)                   | 0,2691 | 0,001204  |
| TcCLB.507077.20  | palmitoyl acyltransferase 4, putative                      | 0,2691 | 0,007325  |
| TcCLB.509319.30  | hypothetical protein, conserved                            | 0,269  | 0,01491   |
| TcCLB.508409.100 | hypothetical protein, conserved                            | 0,2688 | 0,00127   |
| TcCLB.506961.10  | retrotransposon hot spot (RHS) protein, putative           | 0,2688 | 0,02582   |
| TcCLB.509693.170 | hypothetical protein, conserved                            | 0,2688 | 0,02874   |
| TcCLB.507057.20  | hypothetical protein, conserved                            | 0,2688 | 0,03186   |
| TcCLB.507543.10  | dispersed gene family protein 1 (DGF-1), putative          | 0,2687 | 0,5182    |
| TcCLB.507513.80  | hypothetical protein, conserved                            | 0,2686 | 0,008537  |
| TcCLB.509585.10  | dynein heavy chain, putative                               | 0,2685 | 0,00898   |
| TcCLB.504153.250 | Present in the outer mitochondrial membrane proteome 1     | 0,2684 | 0,0425    |
| TcCLB.470521.10  | protein kinase, putative (fragment)                        | 0,2684 | 0,1005    |
| TcCLB.509959.198 | ATP-dependent DEAD/H RNA helicase (pseudogene), puta       | 0,2684 | 0,4207    |
| TcCLB.478671.9   | hypothetical protein, conserved                            | 0,2683 | 0,01665   |
| TcCLB.510041.10  | sec1 family transport protein, putative                    | 0,2683 | 0,1421    |
| TcCLB.509029.150 | hypothetical protein, conserved                            | 0,2681 | 0,1121    |
| TcCLB.510183.30  | hypothetical protein, conserved                            | 0,268  | 0,005061  |
| TcCLB.503723.60  | tartrate-resistant acid phosphatase type 5 precursor, puta | 0,2678 | 0,03375   |
| TcCLB.508741.270 | Kinetoplastid RNA editing protein 1, putative (KREPA1)     | 0,2673 | 0,005161  |
| TcCLB.511649.160 | hypothetical protein, conserved                            | 0,2673 | 0,01623   |
| TcCLB.506047.16  | N-acetyltransferase complex ARD1 subunit (pseudogene),     | 0,2672 | 0,2753    |
| TcCLB.506733.80  | hypothetical protein, conserved                            | 0,2671 | 0,02855   |
| TcCLB.511233.30  | hypothetical protein, conserved                            | 0,267  | 0,03234   |
| TcCLB.506925.370 | MP44 (pseudogene), putative                                | 0,2669 | 0,3037    |
| TcCLB.509141.10  | hypothetical protein                                       | 0,2668 | 0,001644  |
| TcCLB.510289.60  | hypothetical protein                                       | 0,2668 | 0,1192    |
| TcCLB.507681.20  | succinyl-CoA ligase [GDP-forming] beta-chain, putative     | 0,2667 | 0,0004001 |
| TcCLB.504203.10  | hypothetical protein, conserved                            | 0,2667 | 0,02147   |
| TcCLB.506727.120 | hypothetical protein, conserved                            | 0,2666 | 0,001287  |
| TcCLB.508505.20  | hypothetical protein, conserved                            | 0,2665 | 0,01852   |
| TcCLB.509601.130 | hypothetical protein, conserved                            | 0,2664 | 0,1133    |
| TcCLB.508817.70  | DNA repair protein RAD50, putative                         | 0,2663 | 0,0001461 |
| TcCLB.508479.274 | hypothetical protein, conserved                            | 0,2663 | 0,003481  |
| TcCLB.507911.50  | hypothetical protein, conserved                            | 0,2663 | 0,08201   |
| TcCLB.503879.50  | hypothetical protein, conserved                            | 0,2662 | 0,02638   |
| TcCLB.506683.250 | retrotransposon hot spot protein (RHS, pseudogene), puta   | 0,2661 | 0,2147    |

|                  |                                                            |        |          |
|------------------|------------------------------------------------------------|--------|----------|
| TcCLB.511337.10  | hypothetical protein, conserved                            | 0,2659 | 0,01698  |
| TcCLB.507673.65  | DNA-directed RNA polymerase subunit, putative              | 0,2659 | 0,5386   |
| TcCLB.506365.20  | retrotransposon hot spot protein (RHS, pseudogene), puta   | 0,2658 | 0,001216 |
| TcCLB.506529.320 | hypothetical protein, conserved                            | 0,2657 | 0,02257  |
| TcCLB.509393.20  | hypothetical protein, conserved                            | 0,2656 | 0,02986  |
| TcCLB.506909.131 | elongation factor 1-gamma (EF-1-gamma, pseudogene),        | 0,2656 | 0,5498   |
| TcCLB.510965.20  | mitochondrial inner membrane signal peptidase, putative    | 0,2653 | 0,138    |
| TcCLB.510525.30  | hypothetical protein, conserved                            | 0,265  | 0,005984 |
| TcCLB.511817.200 | Present in the outer mitochondrial membrane proteome 3     | 0,265  | 0,0134   |
| TcCLB.510181.150 | caltractin, putative                                       | 0,2649 | 0,1004   |
| TcCLB.511767.100 | hypothetical protein, conserved                            | 0,2646 | 0,2771   |
| TcCLB.506779.130 | hypothetical protein                                       | 0,2645 | 0,01393  |
| TcCLB.504241.34  | dispersed gene family protein 1 (DGF-1), putative (fragme  | 0,2645 | 0,2198   |
| TcCLB.511237.80  | hypothetical protein, conserved                            | 0,2643 | 0,009681 |
| TcCLB.509979.230 | hypothetical protein, conserved                            | 0,2643 | 0,05784  |
| TcCLB.510187.160 | developmentally regulated GTP-binding protein, putative    | 0,2642 | 0,001934 |
| TcCLB.506829.100 | fatty acyl CoA syntetase 1, putative                       | 0,2642 | 0,002732 |
| TcCLB.511181.160 | choline/ethanolamine kinase (pseudogene), putative         | 0,2642 | 0,02827  |
| TcCLB.508347.150 | hypothetical protein, conserved                            | 0,2641 | 0,004102 |
| TcCLB.510091.7   | diacylglycerol acyltransferase, putative (fragment)        | 0,2641 | 0,06177  |
| TcCLB.506459.280 | hypothetical protein, conserved                            | 0,264  | 0,03356  |
| TcCLB.503897.170 | citrate transporter, putative                              | 0,2639 | 0,07087  |
| TcCLB.507875.210 | retrotransposon hot spot protein (RHS, pseudogene), puta   | 0,2638 | 0,00698  |
| TcCLB.508355.20  | hypothetical protein, conserved                            | 0,2637 | 0,1236   |
| TcCLB.511885.50  | retrotransposon hot spot protein (RHS, pseudogene), puta   | 0,2636 | 0,03114  |
| TcCLB.509747.70  | actin-like protein, putative                               | 0,2636 | 0,05275  |
| TcCLB.510103.17  | hypothetical protein, conserved                            | 0,2634 | 0,02506  |
| TcCLB.510749.90  | hypothetical protein, conserved                            | 0,2634 | 0,12     |
| TcCLB.511445.40  | hypothetical protein, conserved                            | 0,2633 | 0,01693  |
| TcCLB.510155.50  | hypothetical protein, conserved                            | 0,2633 | 0,04478  |
| TcCLB.504079.6   | selenophosphate synthetase, putative                       | 0,2631 | 0,007187 |
| TcCLB.506265.114 | Enriched in surface-labeled proteome protein 11, putative  | 0,2631 | 0,01302  |
| TcCLB.510101.130 | inositol-1,4,5-trisphosphate (IP3) 5-phosphatase, putative | 0,2629 | 0,003748 |
| TcCLB.506289.50  | hypothetical protein, conserved                            | 0,2628 | 0,005895 |
| TcCLB.505843.24  | succinate dehydrogenase, putative                          | 0,2627 | 0,008156 |
| TcCLB.511351.9   | inosine-5'-monophosphate dehydrogenase, putative           | 0,2626 | 0,0171   |
| TcCLB.505387.9   | dispersed gene family protein 1 (DGF-1), putative (fragme  | 0,2626 | 0,1286   |
| TcCLB.510121.120 | hypothetical protein, conserved                            | 0,2624 | 0,03924  |
| TcCLB.503453.4   | hypothetical protein, conserved                            | 0,2624 | 0,2765   |
| TcCLB.511225.20  | retrotransposon hot spot protein (RHS, pseudogene), puta   | 0,2623 | 0,003783 |
| TcCLB.506745.20  | hypothetical protein, conserved                            | 0,2623 | 0,03439  |
| TcCLB.507883.80  | adenylate kinase, putative                                 | 0,2623 | 0,1128   |
| TcCLB.508169.60  | dolicholphosphate-mannose synthase, putative (DPMS)        | 0,2622 | 0,04361  |
| TcCLB.510445.40  | hypothetical protein                                       | 0,262  | 0,04298  |
| TcCLB.509105.110 | hypothetical protein, conserved                            | 0,2618 | 0,03093  |

|                  |                                                            |        |          |
|------------------|------------------------------------------------------------|--------|----------|
| TcCLB.504827.110 | hypothetical protein, conserved                            | 0,2616 | 0,006733 |
| TcCLB.508013.90  | hypothetical protein                                       | 0,2616 | 0,5012   |
| TcCLB.506559.230 | hypothetical protein, conserved                            | 0,2615 | 0,1445   |
| TcCLB.511861.60  | beta galactofuranosyl glycosyltransferase (pseudogene), f  | 0,2615 | 0,1456   |
| TcCLB.509951.10  | nucleolar protein, putative                                | 0,2614 | 0,1077   |
| TcCLB.506855.60  | hypothetical protein, conserved                            | 0,2613 | 0,0236   |
| TcCLB.504129.40  | hypothetical protein, conserved                            | 0,2613 | 0,05122  |
| TcCLB.413293.20  | hypothetical protein                                       | 0,2613 | 0,4773   |
| TcCLB.508919.30  | hypothetical protein, conserved                            | 0,2612 | 0,07403  |
| TcCLB.506823.65  | trans-sialidase (pseudogene), putative                     | 0,2612 | 0,2478   |
| TcCLB.503401.11  | retrotransposon hot spot (RHS) protein, putative (fragmer  | 0,2609 | 0,516    |
| TcCLB.511111.10  | translation initiation factor IF-2, putative               | 0,2608 | 0,001199 |
| TcCLB.507583.20  | nucleolar protein, putative                                | 0,2608 | 0,04123  |
| TcCLB.506773.30  | hypothetical protein, conserved                            | 0,2606 | 0,001871 |
| TcCLB.507211.10  | choline/carnitine O-acyltransferase, putative              | 0,2606 | 0,01177  |
| TcCLB.504427.270 | hypothetical protein, conserved                            | 0,2604 | 0,03084  |
| TcCLB.507317.20  | hypothetical protein                                       | 0,2602 | 0,04708  |
| TcCLB.508033.20  | hypothetical protein                                       | 0,2602 | 0,5806   |
| TcCLB.510543.140 | retrotransposon hot spot protein (RHS, pseudogene), puta   | 0,2601 | 0,06816  |
| TcCLB.508061.30  | retrotransposon hot spot protein (RHS, pseudogene), puta   | 0,2601 | 0,1057   |
| TcCLB.506337.10  | vacuolar protein sorting-associated protein-like, putative | 0,26   | 0,02309  |
| TcCLB.506271.10  | ATP-dependent DEAD/H RNA helicase (pseudogene), puta       | 0,26   | 0,2302   |
| TcCLB.508221.780 | hypothetical protein                                       | 0,26   | 0,3182   |
| TcCLB.461879.10  | retrotransposon hot spot protein (RHS, pseudogene), puta   | 0,2598 | 0,1476   |
| TcCLB.507859.120 | dispersed gene family protein 1 (DGF-1), putative          | 0,2598 | 0,6056   |
| TcCLB.509055.60  | hypothetical protein, conserved                            | 0,2595 | 0,1554   |
| TcCLB.506493.70  | serine/threonine protein kinase, putative                  | 0,2594 | 0,009634 |
| TcCLB.507143.50  | hypothetical protein, conserved                            | 0,2593 | 0,01623  |
| TcCLB.508209.144 | hypothetical protein, conserved                            | 0,2593 | 0,08273  |
| TcCLB.511809.80  | hypothetical protein, conserved                            | 0,2591 | 0,001692 |
| TcCLB.509037.40  | eukaryotic translation initiation factor 4E, putative      | 0,2591 | 0,003773 |
| TcCLB.510143.80  | RNA-binding protein, putative                              | 0,259  | 0,008334 |
| TcCLB.510659.257 | phospholipase A2-like protein, putative                    | 0,259  | 0,02684  |
| TcCLB.503939.40  | hypothetical protein, conserved                            | 0,2589 | 0,01103  |
| TcCLB.503689.30  | flagellar protofilament ribbon protein, putative           | 0,2589 | 0,01475  |
| TcCLB.510519.140 | hypothetical protein, conserved                            | 0,2588 | 0,13     |
| TcCLB.503541.40  | hypothetical protein, conserved                            | 0,2586 | 0,05085  |
| TcCLB.506833.20  | hypothetical protein, conserved                            | 0,2586 | 0,1257   |
| TcCLB.506855.70  | hypothetical protein, conserved                            | 0,2582 | 0,004465 |
| TcCLB.508461.390 | hypothetical protein, conserved                            | 0,2581 | 0,007037 |
| TcCLB.510879.80  | serine acetyltransferase, putative (SAT)                   | 0,258  | 0,02758  |
| TcCLB.504179.50  | hypothetical protein                                       | 0,2579 | 0,01209  |
| TcCLB.503729.10  | hypothetical protein, conserved                            | 0,2577 | 0,1011   |
| TcCLB.510655.40  | hypothetical protein, conserved                            | 0,2576 | 0,0201   |
| TcCLB.508111.20  | hypothetical protein, conserved                            | 0,2576 | 0,02192  |

|                  |                                                           |        |           |
|------------------|-----------------------------------------------------------|--------|-----------|
| TcCLB.506925.190 | hypothetical protein, conserved                           | 0,2576 | 0,06966   |
| TcCLB.508951.70  | hypothetical protein, conserved                           | 0,2574 | 0,02809   |
| TcCLB.503719.30  | hypothetical protein, conserved                           | 0,2574 | 0,1109    |
| TcCLB.508283.40  | trans-sialidase (pseudogene), putative                    | 0,2574 | 0,1329    |
| TcCLB.503755.54  | hypothetical protein, conserved                           | 0,2573 | 0,01821   |
| TcCLB.510879.110 | ribosomal protein L3, putative                            | 0,2572 | 0,009851  |
| TcCLB.506345.30  | retrotransposon hot spot protein (RHS, pseudogene), puta  | 0,2571 | 0,007573  |
| TcCLB.508741.10  | hypothetical protein                                      | 0,257  | 0,006554  |
| TcCLB.509859.90  | NAD-dependent deacetylase, putative (fragment)            | 0,257  | 0,3645    |
| TcCLB.507153.10  | hypothetical protein, conserved                           | 0,257  | 0,3917    |
| TcCLB.508061.60  | retrotransposon hot spot protein (RHS, pseudogene), puta  | 0,2569 | 0,03527   |
| TcCLB.506989.199 | hypothetical protein, conserved                           | 0,2567 | 0,1772    |
| TcCLB.504741.130 | hypothetical protein, conserved                           | 0,2566 | 0,001569  |
| TcCLB.506327.40  | hypothetical protein, conserved                           | 0,2566 | 0,002655  |
| TcCLB.509177.40  | hypothetical protein, conserved                           | 0,2566 | 0,03464   |
| TcCLB.508441.30  | protein kinase, putative                                  | 0,2564 | 0,1829    |
| TcCLB.510421.290 | Mad2-like HORMA domain containing protein (mad2)          | 0,2563 | 0,02245   |
| TcCLB.510691.20  | hypothetical protein, conserved                           | 0,2562 | 0,007874  |
| TcCLB.508693.180 | ankyrin, putative                                         | 0,2562 | 0,008297  |
| TcCLB.510337.11  | hypothetical protein, conserved (fragment)                | 0,2562 | 0,03587   |
| TcCLB.504161.50  | hypothetical protein, conserved                           | 0,2562 | 0,05189   |
| TcCLB.511865.10  | hypothetical protein, conserved                           | 0,256  | 0,01102   |
| TcCLB.506045.11  | retrotransposon hot spot protein (RHS, pseudogene), puta  | 0,256  | 0,0948    |
| TcCLB.503801.9   | RAD50 DNA repair protein, putative (fragment)             | 0,2559 | 0,00785   |
| TcCLB.509617.10  | paraflagellar rod protein 3, putative (pseudogene) (PAR3) | 0,2559 | 0,03585   |
| TcCLB.509965.170 | hypothetical protein, conserved                           | 0,2556 | 0,01597   |
| TcCLB.510975.10  | hypothetical protein, conserved (pseudogene)              | 0,2556 | 0,1922    |
| TcCLB.508355.200 | vacuolar protein sorting protein 16, putative             | 0,2555 | 0,002005  |
| TcCLB.509039.10  | hypothetical protein, conserved                           | 0,2555 | 0,002475  |
| TcCLB.508221.880 | hypothetical protein                                      | 0,2555 | 0,636     |
| TcCLB.510247.10  | R27-2 protein, putative                                   | 0,2554 | 0,05097   |
| TcCLB.511613.40  | mucin-associated surface protein (MASP), putative         | 0,2553 | 0,3504    |
| TcCLB.510425.10  | hypothetical protein, conserved                           | 0,2552 | 0,1356    |
| TcCLB.503805.10  | hypothetical protein, conserved                           | 0,2551 | 0,06159   |
| TcCLB.508641.170 | protein kinase, putative                                  | 0,2551 | 0,1029    |
| TcCLB.510629.430 | prefoldin subunit, putative                               | 0,2551 | 0,1182    |
| TcCLB.506437.40  | tuzin                                                     | 0,255  | 0,004438  |
| TcCLB.508897.80  | hypothetical protein, conserved                           | 0,255  | 0,00742   |
| TcCLB.506777.120 | protein kinase, putative                                  | 0,2549 | 0,0474    |
| TcCLB.506559.364 | hypothetical protein, conserved                           | 0,2548 | 0,0005941 |
| TcCLB.506855.140 | synaptobrevin, putative                                   | 0,2548 | 0,02322   |
| TcCLB.511261.150 | hypothetical protein, conserved                           | 0,2548 | 0,08834   |
| TcCLB.507891.20  | flagellar calcium-binding-like protein, putative          | 0,2547 | 0,05858   |
| TcCLB.510767.30  | hypothetical protein                                      | 0,2547 | 0,1285    |
| TcCLB.506389.20  | trans-sialidase (pseudogene), putative                    | 0,2547 | 0,1656    |

|                  |                                                              |        |          |
|------------------|--------------------------------------------------------------|--------|----------|
| TcCLB.507665.30  | ferric reductase transmembrane protein, putative (FR1)       | 0,2546 | 0,004297 |
| TcCLB.510007.60  | hypothetical protein, conserved                              | 0,2546 | 0,004596 |
| TcCLB.503987.4   | Ras-related protein RAB2B, putative (fragment) (RAB2B)       | 0,2546 | 0,09573  |
| TcCLB.510431.280 | RNA editing complex protein MP46, putative                   | 0,2545 | 0,0495   |
| TcCLB.504625.30  | hypothetical protein                                         | 0,2544 | 0,007489 |
| TcCLB.511825.20  | hypothetical protein, conserved                              | 0,2544 | 0,0526   |
| TcCLB.511377.25  | elongation factor 1-gamma (EF-1-gamma, pseudogene),          | 0,2543 | 0,5348   |
| TcCLB.507873.20  | cell differentiation protein, putative                       | 0,2542 | 0,0559   |
| TcCLB.509539.50  | small GTP-binding protein, putative                          | 0,2541 | 0,007246 |
| TcCLB.506635.40  | hypothetical protein, conserved                              | 0,2541 | 0,02575  |
| TcCLB.506933.24  | hypothetical protein, conserved                              | 0,2541 | 0,03855  |
| TcCLB.506457.70  | hypothetical protein, conserved                              | 0,2541 | 0,1112   |
| TcCLB.503799.10  | DNA repair protein RAD50, putative                           | 0,254  | 0,002351 |
| TcCLB.508241.110 | hypothetical protein, conserved                              | 0,254  | 0,01689  |
| TcCLB.505987.10  | hypothetical protein, conserved (pseudogene)                 | 0,254  | 0,09631  |
| TcCLB.510903.20  | hypothetical protein, conserved                              | 0,254  | 0,191    |
| TcCLB.507583.40  | hypothetical protein, conserved                              | 0,2539 | 0,008181 |
| TcCLB.503909.60  | hypothetical protein, conserved                              | 0,2539 | 0,04262  |
| TcCLB.506247.90  | hypothetical protein                                         | 0,2539 | 0,0582   |
| TcCLB.510657.90  | hypothetical protein, conserved                              | 0,2534 | 0,1028   |
| TcCLB.503431.100 | chromatin assembly factor 1 subunit B, putative              | 0,2527 | 0,0123   |
| TcCLB.506479.30  | hypothetical protein, conserved                              | 0,2527 | 0,04453  |
| TcCLB.509155.30  | hypothetical protein, conserved                              | 0,2525 | 0,01177  |
| TcCLB.506821.180 | aquaporin-like protein, putative                             | 0,2525 | 0,07613  |
| TcCLB.507623.40  | hypothetical protein, conserved                              | 0,2524 | 0,06397  |
| TcCLB.510167.20  | hypothetical protein, conserved                              | 0,2523 | 0,1386   |
| TcCLB.503815.20  | lysyl-tRNA synthetase, putative                              | 0,2521 | 0,03976  |
| TcCLB.507003.50  | hypothetical protein, conserved                              | 0,2521 | 0,1096   |
| TcCLB.508549.10  | legume-like lectin, putative                                 | 0,2518 | 0,02658  |
| TcCLB.509063.20  | hypothetical protein, conserved                              | 0,2518 | 0,04725  |
| TcCLB.509029.50  | hypothetical protein, conserved                              | 0,2514 | 0,08941  |
| TcCLB.511339.20  | C-5 sterol desaturase, putative                              | 0,2513 | 0,04665  |
| TcCLB.507875.60  | beta galactofuranosyl glycosyltransferase, putative          | 0,2512 | 0,1261   |
| TcCLB.504055.50  | hypothetical protein, conserved                              | 0,2511 | 0,01292  |
| TcCLB.510311.20  | hypothetical protein, conserved                              | 0,251  | 0,02792  |
| TcCLB.511185.10  | hypothetical protein                                         | 0,251  | 0,08845  |
| TcCLB.508323.9   | farnesyl pyrophosphate synthase, putative                    | 0,2509 | 0,02282  |
| TcCLB.509105.4   | Generative cell specific 1 protein, putative (GCS1)          | 0,2509 | 0,1233   |
| TcCLB.508207.180 | Eukaryotic translation initiation factor 4E type 6, putative | 0,2507 | 0,01799  |
| TcCLB.504075.10  | RNA polymerase I, putative                                   | 0,2506 | 0,06229  |
| TcCLB.506989.40  | Golgi vesicular membrane trafficking protein, putative       | 0,2506 | 0,1671   |
| TcCLB.503723.40  | hypothetical protein, conserved                              | 0,2503 | 0,02867  |
| TcCLB.511165.109 | hypothetical protein, conserved                              | 0,2503 | 0,08708  |
| TcCLB.507047.140 | hypothetical protein, conserved                              | 0,2502 | 0,03551  |
| TcCLB.506331.64  | hypothetical protein                                         | 0,2501 | 0,3244   |



|                  |                                                   |        |            |
|------------------|---------------------------------------------------|--------|------------|
| TcCLB.503919.4   | hypothetical protein, conserved                   | 0,2499 | 0,3186     |
| TcCLB.511533.10  | hypothetical protein, conserved                   | 0,2496 | 0,03944    |
| TcCLB.504741.180 | hypothetical protein, conserved                   | 0,2495 | 0,06144    |
| TcCLB.503987.20  | hypothetical protein, conserved                   | 0,2495 | 0,08021    |
| TcCLB.510789.20  | mucin TcMUC (pseudogene), putative                | 0,2495 | 0,2232     |
| TcCLB.510035.10  | trans-sialidase (pseudogene), putative            | 0,2494 | 0,007431   |
| TcCLB.510763.109 | rRNA processing protein, putative                 | 0,2494 | 0,06564    |
| TcCLB.507895.160 | hypothetical protein, conserved                   | 0,2493 | 0,07825    |
| TcCLB.509719.60  | hypothetical protein                              | 0,2491 | 0,1746     |
| TcCLB.505183.84  | hypothetical protein, conserved                   | 0,2489 | 0,04339    |
| TcCLB.511655.50  | hypothetical protein, conserved (pseudogene)      | 0,2489 | 0,05396    |
| TcCLB.508045.40  | hypothetical protein, conserved                   | 0,2488 | 0,01297    |
| TcCLB.506693.50  | ribonuclease inhibitor-like protein, putative     | 0,2487 | 0,06577    |
| TcCLB.506943.114 | U6 snRNA-associated Sm-like protein LSm5p         | 0,2486 | 0,1446     |
| TcCLB.445869.10  | hypothetical protein, conserved                   | 0,2485 | 0,02853    |
| TcCLB.504045.70  | hypothetical protein, conserved                   | 0,2485 | 0,1126     |
| TcCLB.506963.30  | hypothetical protein, conserved                   | 0,2485 | 0,1184     |
| TcCLB.440363.10  | hypothetical protein, conserved                   | 0,2485 | 0,1344     |
| TcCLB.511583.10  | hypothetical protein, conserved                   | 0,2483 | 0,07033    |
| TcCLB.506519.80  | hypothetical protein, conserved                   | 0,2483 | 0,07073    |
| TcCLB.503929.50  | hypothetical protein, conserved                   | 0,2483 | 0,08448    |
| TcCLB.507807.40  | hypothetical protein, conserved                   | 0,2482 | 0,02536    |
| TcCLB.506321.359 | MRB1-associated protein, putative                 | 0,2481 | 0,1516     |
| TcCLB.504333.20  | trans-sialidase (pseudogene), putative            | 0,248  | 0,02524    |
| TcCLB.508799.10  | hypothetical protein, conserved                   | 0,248  | 0,06372    |
| TcCLB.511725.250 | chaperonin containing t-complex protein, putative | 0,2479 | 0,00008171 |
| TcCLB.510655.60  | hypothetical protein, conserved                   | 0,2479 | 0,08733    |
| TcCLB.507787.80  | hypothetical protein, conserved                   | 0,2479 | 0,1769     |
| TcCLB.508163.181 | hypothetical protein, conserved (pseudogene)      | 0,2479 | 0,4655     |
| TcCLB.508459.9   | hypothetical protein, conserved                   | 0,2478 | 0,09098    |
| TcCLB.508893.10  | hypothetical protein, conserved                   | 0,2477 | 0,02981    |
| TcCLB.506495.6   | hypothetical protein, conserved                   | 0,2476 | 0,1037     |
| TcCLB.503899.10  | heat shock 70 kDa protein, putative               | 0,2475 | 0,026      |
| TcCLB.511577.150 | hypothetical protein, conserved                   | 0,2475 | 0,03416    |
| TcCLB.510187.380 | hypothetical protein, conserved                   | 0,2474 | 0,03419    |
| TcCLB.504827.159 | hypothetical protein, conserved                   | 0,2471 | 0,1192     |
| TcCLB.510911.40  | hypothetical protein, conserved                   | 0,2471 | 0,1569     |
| TcCLB.509507.20  | hypothetical protein, conserved                   | 0,2467 | 0,00824    |
| TcCLB.511367.280 | hypothetical protein, conserved                   | 0,2467 | 0,02443    |
| TcCLB.507927.80  | hypothetical protein                              | 0,2466 | 0,06807    |
| TcCLB.506363.20  | hypothetical protein, conserved                   | 0,2466 | 0,1052     |
| TcCLB.506711.30  | cyclin, putative                                  | 0,2466 | 0,1086     |
| TcCLB.508231.174 | hypothetical protein, conserved                   | 0,2466 | 0,1469     |
| TcCLB.511021.60  | hypothetical protein, conserved                   | 0,2465 | 0,03766    |
| TcCLB.510533.50  | hypothetical protein, conserved                   | 0,2465 | 0,1185     |

|                  |                                                              |        |           |
|------------------|--------------------------------------------------------------|--------|-----------|
| TcCLB.510101.110 | hypothetical protein, conserved                              | 0,2464 | 0,006654  |
| TcCLB.506155.80  | hypothetical protein, conserved                              | 0,2464 | 0,01803   |
| TcCLB.511237.40  | CDP-DAG synthase, putative (CDS)                             | 0,2461 | 0,02551   |
| TcCLB.511725.120 | kinetoplast polyadenylation/uridylation factor 2, putative   | 0,246  | 0,02087   |
| TcCLB.509641.50  | hypothetical protein, conserved                              | 0,2459 | 0,02658   |
| TcCLB.504125.120 | hypothetical protein, conserved                              | 0,2459 | 0,1208    |
| TcCLB.510073.50  | elongation factor 1-gamma (EF-1-gamma), putative             | 0,2458 | 0,04025   |
| TcCLB.507669.180 | hypothetical protein, conserved                              | 0,2457 | 0,01372   |
| TcCLB.506793.10  | hypothetical protein, conserved (pseudogene)                 | 0,2457 | 0,04334   |
| TcCLB.507991.80  | hypothetical protein, conserved                              | 0,2455 | 0,01053   |
| TcCLB.510799.70  | hypothetical protein, conserved                              | 0,2452 | 0,03197   |
| TcCLB.506713.14  | hypothetical protein, conserved                              | 0,2452 | 0,1743    |
| TcCLB.510737.10  | 6-phosphogluconate dehydrogenase, decarboxylating, putative  | 0,2452 | 0,183     |
| TcCLB.506915.20  | hypothetical protein                                         | 0,2451 | 0,02161   |
| TcCLB.506435.440 | hypothetical protein, conserved                              | 0,245  | 0,01718   |
| TcCLB.511867.180 | hypothetical protein, conserved                              | 0,245  | 0,06771   |
| TcCLB.506529.250 | hypothetical protein, conserved                              | 0,2448 | 0,004118  |
| TcCLB.506445.30  | cation transporter, putative                                 | 0,2448 | 0,01853   |
| TcCLB.511711.60  | hypothetical protein                                         | 0,2448 | 0,2216    |
| TcCLB.510879.120 | ribosomal protein L3, putative                               | 0,2446 | 0,0005787 |
| TcCLB.507817.70  | hypothetical protein, conserved                              | 0,2445 | 0,0639    |
| TcCLB.510731.59  | dual specificity protein phosphatase, putative               | 0,2444 | 0,06555   |
| TcCLB.508711.40  | mitochondrial RNA binding protein, putative                  | 0,2442 | 0,01149   |
| TcCLB.508325.180 | retrotransposon hot spot protein (RHS, pseudogene), putative | 0,2442 | 0,0182    |
| TcCLB.506773.150 | hypothetical protein                                         | 0,2442 | 0,031     |
| TcCLB.503651.40  | hypothetical protein                                         | 0,244  | 0,04594   |
| TcCLB.511481.10  | hypothetical protein, conserved                              | 0,2439 | 0,108     |
| TcCLB.508387.40  | hypothetical protein, conserved                              | 0,2439 | 0,1524    |
| TcCLB.503895.10  | hypothetical protein, conserved                              | 0,2438 | 0,02374   |
| TcCLB.511589.60  | hypothetical protein, conserved                              | 0,2437 | 0,1911    |
| TcCLB.506525.104 | AP-4 complex subunit sigma-1, putative                       | 0,2436 | 0,1657    |
| TcCLB.509767.220 | hypothetical protein, conserved                              | 0,2435 | 0,008415  |
| TcCLB.503955.10  | mitochondrial DNA polymerase beta-PAK, putative              | 0,2435 | 0,07076   |
| TcCLB.507897.2   | hypothetical protein, conserved                              | 0,2432 | 0,09362   |
| TcCLB.507811.107 | hypothetical protein, conserved                              | 0,2432 | 0,1292    |
| TcCLB.503423.5   | retrotransposon hot spot (RHS) protein, putative (fragment)  | 0,2429 | 0,5094    |
| TcCLB.511621.240 | hypothetical protein, conserved                              | 0,2427 | 0,006643  |
| TcCLB.511877.15  | elongation factor 1-gamma (EF-1-gamma, pseudogene), putative | 0,2427 | 0,1829    |
| TcCLB.510243.50  | adenylate kinase, putative                                   | 0,2426 | 0,02399   |
| TcCLB.507143.10  | hypothetical protein, conserved                              | 0,2425 | 0,004167  |
| TcCLB.504159.109 | hypothetical protein, conserved                              | 0,2424 | 0,1526    |
| TcCLB.506637.110 | hypothetical protein, conserved                              | 0,2423 | 0,003563  |
| TcCLB.509791.140 | hypothetical protein, conserved                              | 0,2423 | 0,07286   |
| TcCLB.510963.80  | hypothetical protein, conserved                              | 0,2423 | 0,2234    |
| TcCLB.508873.50  | hypothetical protein                                         | 0,2423 | 0,6316    |

|                  |                                                           |        |          |
|------------------|-----------------------------------------------------------|--------|----------|
| TcCLB.511817.230 | hypothetical protein, conserved                           | 0,2422 | 0,004965 |
| TcCLB.511807.6   | ATP-dependent DEAD/H RNA helicase (pseudogene), puta      | 0,2422 | 0,04117  |
| TcCLB.503789.34  | hypothetical protein, conserved                           | 0,2421 | 0,0515   |
| TcCLB.506389.70  | translation-associated element 2, putative                | 0,2419 | 0,01299  |
| TcCLB.508209.80  | hypothetical protein, conserved                           | 0,2419 | 0,04437  |
| TcCLB.503521.80  | hypothetical protein, conserved                           | 0,2419 | 0,07945  |
| TcCLB.508547.70  | Present in the outer mitochondrial membrane proteome      | 0,2418 | 0,04832  |
| TcCLB.508239.10  | origin recognition complex subunit 1 (ORC1), putative     | 0,2418 | 0,05807  |
| TcCLB.507603.130 | hypothetical protein, conserved                           | 0,2417 | 0,06676  |
| TcCLB.506265.140 | hypothetical protein, conserved                           | 0,2416 | 0,07057  |
| TcCLB.402863.9   | dynein heavy chain, putative (fragment)                   | 0,2415 | 0,01879  |
| TcCLB.508255.20  | hypothetical protein, conserved (pseudogene)              | 0,2415 | 0,1196   |
| TcCLB.511507.10  | hypothetical protein, conserved                           | 0,2415 | 0,2362   |
| TcCLB.506457.99  | hypothetical protein, conserved                           | 0,2414 | 0,01959  |
| TcCLB.506123.50  | hypothetical protein, conserved                           | 0,2414 | 0,0887   |
| TcCLB.504071.60  | hypothetical protein, conserved                           | 0,241  | 0,04638  |
| TcCLB.506885.170 | hypothetical protein, conserved                           | 0,2409 | 0,07388  |
| TcCLB.510431.190 | hypothetical protein                                      | 0,2407 | 0,002201 |
| TcCLB.506221.120 | hypothetical protein, conserved                           | 0,2407 | 0,1107   |
| TcCLB.511651.19  | delta-adaptin, putative                                   | 0,2407 | 0,2397   |
| TcCLB.510741.220 | hypothetical protein, conserved                           | 0,2404 | 0,01796  |
| TcCLB.509927.10  | trans-sialidase, putative (fragment)                      | 0,2403 | 0,1118   |
| TcCLB.503945.30  | hypothetical protein, conserved                           | 0,2403 | 0,1284   |
| TcCLB.506243.77  | retrotransposon hot spot protein (RHS, pseudogene), puta  | 0,2403 | 0,3175   |
| TcCLB.510089.200 | hypothetical protein, conserved                           | 0,2402 | 0,01243  |
| TcCLB.506979.50  | hypothetical protein, conserved                           | 0,2402 | 0,0166   |
| TcCLB.506925.450 | hypothetical protein, conserved                           | 0,2402 | 0,01836  |
| TcCLB.509571.4   | PAB1-binding protein , putative                           | 0,2397 | 0,004278 |
| TcCLB.503835.20  | hypothetical protein, conserved                           | 0,2397 | 0,07267  |
| TcCLB.510149.60  | hypothetical protein, conserved                           | 0,2396 | 0,1043   |
| TcCLB.509155.10  | hypothetical protein, conserved                           | 0,2395 | 0,002322 |
| TcCLB.508879.60  | hypothetical protein, conserved                           | 0,2395 | 0,004633 |
| TcCLB.503957.20  | retrotransposon hot spot (RHS) protein, putative          | 0,2393 | 0,04968  |
| TcCLB.511847.60  | mitochondrial DNA polymerase I protein B, putative (POLI  | 0,2392 | 0,01021  |
| TcCLB.509213.20  | hypothetical protein, conserved                           | 0,2392 | 0,07748  |
| TcCLB.509509.69  | hypothetical protein, conserved                           | 0,2392 | 0,1086   |
| TcCLB.510745.49  | hypothetical protein, conserved (fragment)                | 0,2392 | 0,2324   |
| TcCLB.505967.19  | dispersed gene family protein 1 (DGF-1), putative (fragme | 0,2389 | 0,3694   |
| TcCLB.506349.53  | retrotransposon hot spot protein (RHS, pseudogene), puta  | 0,2388 | 0,007022 |
| TcCLB.508397.10  | V-type proton ATPase subunit D, putative (VAd)            | 0,2382 | 0,03071  |
| TcCLB.509353.50  | hypothetical protein, conserved                           | 0,2382 | 0,03902  |
| TcCLB.511647.44  | hypothetical protein, conserved                           | 0,2381 | 0,1623   |
| TcCLB.511367.20  | hypothetical protein                                      | 0,2381 | 0,5884   |
| TcCLB.511257.60  | surface protease GP63, putative                           | 0,2379 | 0,1023   |
| TcCLB.466965.10  | trans-sialidase (pseudogene), putative                    | 0,2378 | 0,1184   |

|                  |                                                           |        |           |
|------------------|-----------------------------------------------------------|--------|-----------|
| TcCLB.508575.20  | hypothetical protein                                      | 0,2378 | 0,5118    |
| TcCLB.509807.11  | hypothetical protein, conserved (pseudogene)              | 0,2377 | 0,1135    |
| TcCLB.506227.170 | hypothetical protein, conserved                           | 0,2376 | 0,1809    |
| TcCLB.510431.270 | hypothetical protein, conserved                           | 0,2374 | 0,02173   |
| TcCLB.508487.11  | retrotransposon hot spot protein (RHS, pseudogene), puta  | 0,2374 | 0,1279    |
| TcCLB.503421.14  | ATP-dependent DEAD/H RNA helicase (pseudogene), puta      | 0,2373 | 0,42      |
| TcCLB.507519.160 | hypothetical protein, conserved                           | 0,2372 | 0,08451   |
| TcCLB.511577.40  | 35 kDa cyclophilin, putative (CYP35)                      | 0,2372 | 0,1537    |
| TcCLB.509965.110 | importin alpha, putative                                  | 0,2371 | 0,00652   |
| TcCLB.508039.30  | retrotransposon hot spot (RHS) protein, putative          | 0,2371 | 0,02031   |
| TcCLB.511811.20  | hypothetical protein, conserved                           | 0,2371 | 0,06597   |
| TcCLB.511577.86  | N-acetyltransferase, putative                             | 0,2369 | 0,02478   |
| TcCLB.506579.40  | hypothetical protein, conserved                           | 0,2368 | 0,002171  |
| TcCLB.510719.240 | hypothetical protein, conserved                           | 0,2368 | 0,1161    |
| TcCLB.507643.90  | beta galactofuranosyl glycosyltransferase (pseudogene), f | 0,2367 | 0,05442   |
| TcCLB.508739.70  | protein kinase, putative                                  | 0,2365 | 0,0005153 |
| TcCLB.509647.70  | guanylate kinase, putative                                | 0,2365 | 0,02163   |
| TcCLB.506829.30  | hypothetical protein, conserved                           | 0,2365 | 0,1178    |
| TcCLB.506335.55  | elongation factor 1-gamma (EF-1-gamma, pseudogene), l     | 0,2365 | 0,3313    |
| TcCLB.509611.120 | hypothetical protein, conserved                           | 0,2362 | 0,1062    |
| TcCLB.508951.40  | acyl-CoA dehydrogenase, putative                          | 0,2362 | 0,1176    |
| TcCLB.510963.10  | DNA damage repair protein, putative                       | 0,2361 | 0,01637   |
| TcCLB.506871.130 | hypothetical protein, conserved                           | 0,236  | 0,03836   |
| TcCLB.511737.60  | hypothetical protein, conserved                           | 0,2359 | 0,07486   |
| TcCLB.505999.30  | anti-silencing protein ASF 1, putative                    | 0,2359 | 0,1676    |
| TcCLB.503953.40  | hypothetical protein, conserved                           | 0,2359 | 0,1706    |
| TcCLB.510821.50  | replication Factor A 28 kDa subunit, putative             | 0,2358 | 0,01135   |
| TcCLB.506401.310 | hypothetical protein, conserved                           | 0,2354 | 0,09394   |
| TcCLB.510571.10  | hypothetical protein, conserved                           | 0,2351 | 0,1906    |
| TcCLB.509289.20  | tuzin, putative                                           | 0,235  | 0,0004691 |
| TcCLB.504427.30  | hypothetical protein, conserved                           | 0,235  | 0,03051   |
| TcCLB.508909.100 | hypothetical protein, conserved                           | 0,2348 | 0,02721   |
| TcCLB.504741.40  | hypothetical protein, conserved                           | 0,2345 | 0,08857   |
| TcCLB.510665.70  | acyl transferase-like protein, putative                   | 0,2345 | 0,2433    |
| TcCLB.510735.9   | hypothetical protein, conserved                           | 0,2343 | 0,02124   |
| TcCLB.510895.20  | hypothetical protein, conserved                           | 0,2342 | 0,05615   |
| TcCLB.508501.300 | hypothetical protein, conserved                           | 0,2342 | 0,07369   |
| TcCLB.509753.202 | hypothetical protein                                      | 0,2342 | 0,6298    |
| TcCLB.398235.20  | ubiquitin fusion degradation protein, putative            | 0,234  | 0,4991    |
| TcCLB.504097.20  | hypothetical protein, conserved                           | 0,2339 | 0,0721    |
| TcCLB.511807.270 | hypothetical protein, conserved                           | 0,2338 | 0,0118    |
| TcCLB.511751.50  | protein kinase, putative                                  | 0,2338 | 0,03583   |
| TcCLB.511725.210 | hypothetical protein, conserved                           | 0,2338 | 0,06894   |
| TcCLB.504057.70  | hypothetical protein, conserved                           | 0,2338 | 0,07612   |
| TcCLB.510099.131 | hypothetical protein, conserved (fragment)                | 0,2337 | 0,02908   |

|                  |                                                           |        |          |
|------------------|-----------------------------------------------------------|--------|----------|
| TcCLB.507883.60  | hypothetical protein, conserved                           | 0,2337 | 0,04458  |
| TcCLB.508001.30  | hypothetical protein, conserved (pseudogene)              | 0,2337 | 0,1403   |
| TcCLB.506683.10  | hypothetical protein, conserved (pseudogene)              | 0,2337 | 0,6319   |
| TcCLB.510901.210 | hypothetical protein, conserved                           | 0,2336 | 0,01949  |
| TcCLB.507615.80  | hypothetical protein, conserved                           | 0,2335 | 0,008079 |
| TcCLB.511291.110 | hypothetical protein, conserved                           | 0,2335 | 0,04943  |
| TcCLB.507497.20  | retrotransposon hot spot protein (RHS, pseudogene), puta  | 0,2335 | 0,3238   |
| TcCLB.508257.140 | Aquaporin 2                                               | 0,2334 | 0,0222   |
| TcCLB.508189.11  | retrotransposon hot spot protein (RHS, pseudogene), puta  | 0,2333 | 0,4905   |
| TcCLB.509831.33  | hypothetical protein, conserved                           | 0,2331 | 0,003808 |
| TcCLB.509805.40  | Multisite-specific tRNA:(cytosine-C(5))-methyltransferase | 0,2331 | 0,03819  |
| TcCLB.503597.5   | hypothetical protein (fragment)                           | 0,2331 | 0,08789  |
| TcCLB.509671.172 | hypothetical protein, conserved                           | 0,2331 | 0,1717   |
| TcCLB.509875.110 | hypothetical protein                                      | 0,2331 | 0,5925   |
| TcCLB.504151.69  | hypothetical protein, conserved                           | 0,2325 | 0,02848  |
| TcCLB.506025.10  | hypothetical protein, conserved                           | 0,2325 | 0,0609   |
| TcCLB.508271.4   | hypothetical protein, conserved                           | 0,2325 | 0,19     |
| TcCLB.511467.70  | hypothetical protein, conserved                           | 0,2325 | 0,2518   |
| TcCLB.509971.60  | surface protease GP63, putative                           | 0,2324 | 0,5265   |
| TcCLB.511821.100 | hypothetical protein, conserved                           | 0,2323 | 0,02045  |
| TcCLB.508539.71  | elongation factor 1-gamma (EF-1-gamma, pseudogene),       | 0,2322 | 0,3665   |
| TcCLB.506067.179 | elongation factor 1-gamma (EF-1-gamma, pseudogene),       | 0,2322 | 0,636    |
| TcCLB.511151.11  | hypothetical protein (fragment)                           | 0,2321 | 0,007557 |
| TcCLB.508645.10  | SNF2 family protein                                       | 0,2321 | 0,01644  |
| TcCLB.507757.26  | hypothetical protein                                      | 0,2321 | 0,5732   |
| TcCLB.510055.50  | hypothetical protein, conserved                           | 0,232  | 0,01095  |
| TcCLB.510005.20  | trans-sialidase, Group II, putative                       | 0,2318 | 0,1476   |
| TcCLB.504149.190 | hypothetical protein, conserved (pseudogene)              | 0,2317 | 0,004851 |
| TcCLB.510039.80  | hypothetical protein, conserved                           | 0,2317 | 0,1136   |
| TcCLB.508153.560 | hypothetical protein, conserved                           | 0,2317 | 0,1449   |
| TcCLB.510089.190 | hypothetical protein, conserved                           | 0,2316 | 0,0431   |
| TcCLB.422921.20  | 50S ribosomal protein L17, putative                       | 0,2316 | 0,2596   |
| TcCLB.510303.190 | cell cycle associated protein MOB1, putative              | 0,2315 | 0,04227  |
| TcCLB.507711.160 | hypothetical protein, conserved                           | 0,2314 | 0,003237 |
| TcCLB.511647.40  | hypothetical protein, conserved                           | 0,2314 | 0,04387  |
| TcCLB.506553.10  | hypothetical protein, conserved                           | 0,2314 | 0,19     |
| TcCLB.505071.104 | hypothetical protein, conserved                           | 0,2313 | 0,2462   |
| TcCLB.508479.5   | glycine dehydrogenase (pseudogene), putative              | 0,2312 | 0,3817   |
| TcCLB.508647.210 | dynein arm light chain, putative                          | 0,2309 | 0,003472 |
| TcCLB.508479.170 | hypothetical protein, conserved                           | 0,2309 | 0,04241  |
| TcCLB.509319.50  | hypothetical protein, conserved                           | 0,2305 | 0,002237 |
| TcCLB.509979.10  | hypothetical protein, conserved                           | 0,2305 | 0,004139 |
| TcCLB.505193.60  | hypothetical protein, conserved                           | 0,2305 | 0,09005  |
| TcCLB.506195.140 | hypothetical protein, conserved                           | 0,2304 | 0,02721  |
| TcCLB.509671.40  | hypothetical protein, conserved                           | 0,2303 | 0,09249  |

|                  |                                                                          |        |           |
|------------------|--------------------------------------------------------------------------|--------|-----------|
| TcCLB.507547.59  | hypothetical protein, conserved                                          | 0,2301 | 0,2256    |
| TcCLB.505163.80  | oligosaccharyl transferase subunit, putative                             | 0,2298 | 0,0003353 |
| TcCLB.511303.24  | hypothetical protein, conserved                                          | 0,2298 | 0,07823   |
| TcCLB.503785.30  | hypothetical protein, conserved                                          | 0,2298 | 0,1741    |
| TcCLB.443971.10  | hypothetical protein, conserved (fragment)                               | 0,2298 | 0,571     |
| TcCLB.509029.70  | leucine-rich repeat protein, putative                                    | 0,2297 | 0,1294    |
| TcCLB.509715.140 | hypothetical protein, conserved                                          | 0,2295 | 0,1402    |
| TcCLB.507993.260 | hypothetical protein, conserved                                          | 0,2294 | 0,04939   |
| TcCLB.507711.330 | serine peptidase, putative                                               | 0,2292 | 0,0453    |
| TcCLB.508355.160 | hypothetical protein, conserved                                          | 0,2289 | 0,01635   |
| TcCLB.508027.90  | hypothetical protein, conserved                                          | 0,2289 | 0,02426   |
| TcCLB.504625.50  | dual specificity protein phosphatase or MAP kinase phosphatase, putative | 0,2289 | 0,05097   |
| TcCLB.510967.20  | hypothetical protein, conserved                                          | 0,2285 | 0,1319    |
| TcCLB.509317.40  | ribosomal protein L11, putative                                          | 0,2282 | 0,1401    |
| TcCLB.510959.15  | elongation factor 1-gamma (EF-1-gamma, pseudogene), putative             | 0,2281 | 0,6175    |
| TcCLB.510149.30  | hypothetical protein, conserved                                          | 0,228  | 0,0191    |
| TcCLB.511647.42  | hypothetical protein, conserved                                          | 0,228  | 0,2199    |
| TcCLB.510421.300 | hypothetical protein, conserved                                          | 0,2279 | 0,1349    |
| TcCLB.506201.70  | serine/threonine-protein phosphatase PP1 alpha                           | 0,2279 | 0,2207    |
| TcCLB.509875.165 | trans-sialidase (pseudogene), putative                                   | 0,2279 | 0,2465    |
| TcCLB.508279.10  | trans-sialidase (pseudogene), putative                                   | 0,2279 | 0,2874    |
| TcCLB.508741.240 | hypothetical protein, conserved                                          | 0,2278 | 0,02647   |
| TcCLB.507925.20  | hypothetical protein, conserved                                          | 0,2278 | 0,03179   |
| TcCLB.508461.240 | chaperone protein DNAJ, putative                                         | 0,2278 | 0,05687   |
| TcCLB.506579.129 | hypothetical protein, conserved (fragment)                               | 0,2277 | 0,1319    |
| TcCLB.505023.10  | trans-sialidase (pseudogene), putative                                   | 0,2277 | 0,248     |
| TcCLB.503467.30  | oligosaccharyl transferase subunit, putative                             | 0,2276 | 0,03209   |
| TcCLB.511135.30  | hypothetical protein, conserved                                          | 0,2276 | 0,05733   |
| TcCLB.508119.100 | hypothetical protein, conserved                                          | 0,2275 | 0,02685   |
| TcCLB.509055.69  | hypothetical protein, conserved (fragment)                               | 0,2275 | 0,278     |
| TcCLB.508999.20  | Protein transport protein yif1, putative                                 | 0,2271 | 0,1458    |
| TcCLB.507045.10  | retrotransposon hot spot protein (RHS, pseudogene), putative             | 0,2268 | 0,1179    |
| TcCLB.508413.50  | RNA-binding protein, putative                                            | 0,2267 | 0,01625   |
| TcCLB.508397.30  | SPFH domain / Band 7 family protein, putative                            | 0,2265 | 0,06899   |
| TcCLB.511283.160 | hypothetical protein, conserved                                          | 0,2264 | 0,01317   |
| TcCLB.511523.60  | hypothetical protein, conserved                                          | 0,2263 | 0,01773   |
| TcCLB.503823.169 | kinetoplastid kinetochore protein 2, putative (fragment) (l)             | 0,2263 | 0,07068   |
| TcCLB.507159.14  | hypothetical protein, conserved                                          | 0,2262 | 0,2037    |
| TcCLB.506975.97  | hypothetical protein, conserved (fragment)                               | 0,2262 | 0,4472    |
| TcCLB.511417.94  | hypothetical protein, conserved                                          | 0,2261 | 0,1542    |
| TcCLB.504221.20  | 26S proteasome regulatory non-ATPase subunit, putative                   | 0,2259 | 0,04854   |
| TcCLB.511199.20  | hypothetical protein, conserved                                          | 0,2259 | 0,05765   |
| TcCLB.510121.130 | serine/threonine protein kinase, putative                                | 0,2259 | 0,2291    |
| TcCLB.503805.30  | hypothetical protein, conserved                                          | 0,2257 | 0,1148    |
| TcCLB.508717.56  | hypothetical protein, conserved                                          | 0,2255 | 0,07322   |

|                  |                                                              |        |          |
|------------------|--------------------------------------------------------------|--------|----------|
| TcCLB.509575.10  | retrotransposon hot spot (RHS) protein, putative             | 0,2255 | 0,08561  |
| TcCLB.511825.190 | hypothetical protein, conserved                              | 0,2252 | 0,008988 |
| TcCLB.507925.50  | hypothetical protein, conserved                              | 0,2251 | 0,007635 |
| TcCLB.508169.120 | hypothetical protein, conserved                              | 0,2251 | 0,09032  |
| TcCLB.508827.30  | eukaryotic translation initiation factor, putative           | 0,225  | 0,007455 |
| TcCLB.511589.40  | hypothetical protein, conserved                              | 0,225  | 0,1378   |
| TcCLB.511533.19  | dynein light intermediate chain, putative                    | 0,225  | 0,1857   |
| TcCLB.508409.9   | 26S proteasome regulatory non-ATPase subunit, putative       | 0,2249 | 0,04221  |
| TcCLB.509231.30  | hypothetical protein                                         | 0,2249 | 0,2068   |
| TcCLB.503999.100 | phospholipid-transporting ATPase 1-like protein, putative    | 0,2249 | 0,2372   |
| TcCLB.510187.110 | Mitochondrial ribosomal protein S18, putative (MRPS18)       | 0,2248 | 0,01794  |
| TcCLB.509715.80  | hypothetical protein, conserved                              | 0,2248 | 0,02864  |
| TcCLB.510667.30  | hypothetical protein, conserved                              | 0,2248 | 0,04614  |
| TcCLB.510431.330 | hypothetical protein, conserved                              | 0,2248 | 0,1514   |
| TcCLB.506529.640 | hypothetical protein, conserved                              | 0,2247 | 0,01155  |
| TcCLB.510749.30  | Sorting nexin-4 (ATG24)                                      | 0,2247 | 0,01634  |
| TcCLB.511715.30  | hypothetical protein, conserved                              | 0,2247 | 0,2294   |
| TcCLB.473619.9   | dispersed gene family protein 1 (DGF-1), putative (fragment) | 0,2247 | 0,6597   |
| TcCLB.510187.410 | hypothetical protein, conserved                              | 0,2246 | 0,04017  |
| TcCLB.509265.50  | hypothetical protein, conserved (pseudogene)                 | 0,2246 | 0,09816  |
| TcCLB.509979.281 | elongation factor 1-gamma (EF-1-gamma, pseudogene),          | 0,2244 | 0,2896   |
| TcCLB.511109.60  | hypothetical protein, conserved                              | 0,2243 | 0,0128   |
| TcCLB.510317.14  | hypothetical protein, conserved                              | 0,2243 | 0,08055  |
| TcCLB.506941.270 | DNA-J protein, putative                                      | 0,2241 | 0,06796  |
| TcCLB.506469.139 | hypothetical protein, conserved                              | 0,2241 | 0,2683   |
| TcCLB.511215.50  | hypothetical protein, conserved                              | 0,2239 | 0,0217   |
| TcCLB.506885.320 | hypothetical protein, conserved                              | 0,2239 | 0,02632  |
| TcCLB.510729.299 | protein kinase, putative                                     | 0,2239 | 0,2089   |
| TcCLB.507949.40  | hypothetical protein, conserved                              | 0,2238 | 0,02968  |
| TcCLB.511517.110 | hypothetical protein, conserved                              | 0,2238 | 0,04249  |
| TcCLB.507603.160 | hypothetical protein, conserved                              | 0,2237 | 0,1674   |
| TcCLB.511653.10  | delta-adaptin, putative                                      | 0,2235 | 0,01864  |
| TcCLB.454403.30  | retrotransposon hot spot protein (RHS, pseudogene), puta     | 0,2234 | 0,1272   |
| TcCLB.506437.20  | tuzin, putative                                              | 0,2231 | 0,002779 |
| TcCLB.511859.50  | hypothetical protein, conserved                              | 0,2231 | 0,08019  |
| TcCLB.503995.30  | hypothetical protein                                         | 0,223  | 0,1612   |
| TcCLB.506629.60  | vesicular-fusion ATPase-like protein, putative               | 0,2229 | 0,06298  |
| TcCLB.511693.110 | hypothetical protein, conserved                              | 0,2228 | 0,1706   |
| TcCLB.506789.140 | MORN repeat-containing protein                               | 0,2227 | 0,1208   |
| TcCLB.508727.18  | centrin, putative                                            | 0,2227 | 0,1298   |
| TcCLB.506065.10  | retrotransposon hot spot protein (RHS, pseudogene), puta     | 0,2227 | 0,3758   |
| TcCLB.510519.110 | hypothetical protein                                         | 0,2225 | 0,1916   |
| TcCLB.509875.200 | copper homeostasis protein, putative                         | 0,2223 | 0,05456  |
| TcCLB.503617.20  | kinetoplast DNA-associated protein, putative                 | 0,2222 | 0,007431 |
| TcCLB.510661.129 | hypothetical protein, conserved                              | 0,2222 | 0,06504  |

|                  |                                                          |        |          |
|------------------|----------------------------------------------------------|--------|----------|
| TcCLB.504041.4   | RNA polymerase I                                         | 0,222  | 0,207    |
| TcCLB.508851.70  | hypothetical protein                                     | 0,2219 | 0,07566  |
| TcCLB.506343.10  | serine/threonine protein kinase, putative                | 0,2216 | 0,1601   |
| TcCLB.508089.40  | hypothetical protein, conserved                          | 0,2213 | 0,1286   |
| TcCLB.506577.90  | retrotransposon hot spot protein (RHS, pseudogene), puta | 0,2212 | 0,04961  |
| TcCLB.508741.210 | hypothetical protein                                     | 0,2211 | 0,004063 |
| TcCLB.511585.130 | ubiquitin activating enzyme, putative                    | 0,221  | 0,04321  |
| TcCLB.509571.10  | hypothetical protein, conserved                          | 0,221  | 0,1564   |
| TcCLB.506303.90  | hypothetical protein, conserved                          | 0,2209 | 0,04589  |
| TcCLB.511817.70  | hypothetical protein, conserved                          | 0,2208 | 0,1202   |
| TcCLB.510767.50  | hypothetical protein, conserved                          | 0,2208 | 0,1286   |
| TcCLB.506777.100 | hypothetical protein, conserved                          | 0,2208 | 0,1313   |
| TcCLB.503893.170 | hypothetical protein, conserved                          | 0,2207 | 0,05153  |
| TcCLB.506177.130 | hypothetical protein, conserved                          | 0,2207 | 0,2479   |
| TcCLB.504033.180 | hypothetical protein, conserved                          | 0,2205 | 0,003311 |
| TcCLB.503885.50  | hypothetical protein, conserved                          | 0,2205 | 0,07074  |
| TcCLB.503395.30  | hypothetical protein, conserved                          | 0,2203 | 0,04871  |
| TcCLB.506933.98  | dual specificity protein phosphatase, putative           | 0,2203 | 0,0578   |
| TcCLB.504123.50  | hypothetical protein, conserved (pseudogene)             | 0,2202 | 0,01103  |
| TcCLB.510579.90  | hypothetical protein, conserved                          | 0,2202 | 0,04267  |
| TcCLB.506961.40  | retrotransposon hot spot protein (RHS, pseudogene), puta | 0,2201 | 0,02586  |
| TcCLB.506435.40  | hypothetical protein, conserved                          | 0,2201 | 0,1891   |
| TcCLB.509815.10  | retrotransposon hot spot (RHS) protein, putative         | 0,22   | 0,178    |
| TcCLB.511021.80  | hypothetical protein, conserved                          | 0,2199 | 0,03583  |
| TcCLB.508645.20  | hypothetical protein                                     | 0,2199 | 0,05069  |
| TcCLB.511211.60  | protein phosphatase 4 catalytic subunit, putative        | 0,2198 | 0,03589  |
| TcCLB.509785.70  | retrotransposon hot spot (RHS) protein, putative         | 0,2196 | 0,1265   |
| TcCLB.503893.40  | hypothetical protein, conserved                          | 0,2195 | 0,09438  |
| TcCLB.506321.270 | hypothetical protein, conserved                          | 0,2195 | 0,1554   |
| TcCLB.510001.31  | hypothetical protein, conserved                          | 0,2195 | 0,1591   |
| TcCLB.509023.140 | hypothetical protein, conserved                          | 0,2194 | 0,141    |
| TcCLB.508973.90  | Present in the outer mitochondrial membrane proteome     | 0,2193 | 0,0318   |
| TcCLB.421321.9   | exportin-T, putative (fragment)                          | 0,2193 | 0,06858  |
| TcCLB.509999.90  | carnitine/choline acetyltransferase, putative            | 0,2192 | 0,009155 |
| TcCLB.510329.240 | hypothetical protein, conserved                          | 0,2192 | 0,1268   |
| TcCLB.509395.50  | hypothetical protein, conserved                          | 0,2191 | 0,01378  |
| TcCLB.509951.49  | DNA-directed RNA polymerase II subunit 2, putative       | 0,2191 | 0,06783  |
| TcCLB.506679.200 | hypothetical protein, conserved                          | 0,2191 | 0,07044  |
| TcCLB.511351.20  | hypothetical protein, conserved                          | 0,2191 | 0,08479  |
| TcCLB.505999.120 | hypothetical protein                                     | 0,2191 | 0,1185   |
| TcCLB.510603.10  | hypothetical protein, conserved                          | 0,2191 | 0,2378   |
| TcCLB.511809.110 | hypothetical protein, conserved                          | 0,2189 | 0,02535  |
| TcCLB.507257.20  | hypothetical protein, conserved                          | 0,2189 | 0,05373  |
| TcCLB.508533.10  | hypothetical protein, conserved                          | 0,2188 | 0,0832   |
| TcCLB.509539.59  | hypothetical protein, conserved                          | 0,2188 | 0,2871   |



|                  |                                                           |        |          |
|------------------|-----------------------------------------------------------|--------|----------|
| TcCLB.506367.10  | isovaleryl-coA dehydrogenase, putative (fragment)         | 0,2184 | 0,2828   |
| TcCLB.506859.49  | hypothetical protein, conserved                           | 0,2183 | 0,03131  |
| TcCLB.509735.150 | retrotransposon hot spot protein (RHS, pseudogene), puta  | 0,2182 | 0,02913  |
| TcCLB.510689.89  | hypothetical protein, conserved                           | 0,2182 | 0,461    |
| TcCLB.510359.20  | paraflagellar rod component, putative                     | 0,2182 | 0,4845   |
| TcCLB.509103.20  | tubulin-tyrosine ligase, putative                         | 0,2181 | 0,08678  |
| TcCLB.505941.30  | hypothetical protein, conserved                           | 0,218  | 0,0313   |
| TcCLB.509711.20  | retrotransposon hot spot protein (RHS, pseudogene), puta  | 0,218  | 0,5029   |
| TcCLB.506885.180 | hypothetical protein, conserved                           | 0,2178 | 0,07921  |
| TcCLB.420495.10  | hypothetical protein, conserved (pseudogene)              | 0,2178 | 0,1661   |
| TcCLB.506245.76  | trans-sialidase (pseudogene), putative                    | 0,2177 | 0,3925   |
| TcCLB.507951.280 | ABC transporter, putative                                 | 0,2176 | 0,03204  |
| TcCLB.508409.280 | hypothetical protein, conserved                           | 0,2175 | 0,112    |
| TcCLB.506625.220 | hypothetical protein, conserved                           | 0,2174 | 0,04883  |
| TcCLB.507993.369 | sjogren s syndrome nuclear autoantigen 1, putative        | 0,2172 | 0,1212   |
| TcCLB.511353.4   | choline/carnitine O-acyltransferase, putative             | 0,2171 | 0,08551  |
| TcCLB.507089.140 | hypothetical protein, conserved                           | 0,217  | 0,04814  |
| TcCLB.508961.20  | hypothetical protein, conserved                           | 0,217  | 0,141    |
| TcCLB.511481.30  | hypothetical protein, conserved                           | 0,2168 | 0,1674   |
| TcCLB.511487.19  | trans-sialidase (pseudogene), putative                    | 0,2166 | 0,0441   |
| TcCLB.506577.40  | hypothetical protein, conserved                           | 0,2166 | 0,08612  |
| TcCLB.511727.90  | vacuolar proton-ATPase-like protein, putative             | 0,2164 | 0,006229 |
| TcCLB.511507.90  | hypothetical protein, conserved                           | 0,2164 | 0,09515  |
| TcCLB.509267.60  | NADH-ubiquinone oxidoreductase complex I subunit, puta    | 0,2164 | 0,1294   |
| TcCLB.509717.70  | transportin2-like protein, putative                       | 0,2163 | 0,0202   |
| TcCLB.511287.124 | peroxin 13, putative (PEX13)                              | 0,2163 | 0,09279  |
| TcCLB.506369.70  | histone H1, putative                                      | 0,2162 | 0,001526 |
| TcCLB.507801.60  | hypothetical protein, conserved                           | 0,2162 | 0,03732  |
| TcCLB.508059.20  | hypothetical protein, conserved                           | 0,2162 | 0,1011   |
| TcCLB.506885.10  | alpha-1,2-mannosyltransferase, putative                   | 0,2161 | 0,04332  |
| TcCLB.507941.30  | PrimPol-like protein 1, putative (ppl1)                   | 0,216  | 0,08834  |
| TcCLB.503939.84  | hypothetical protein, conserved                           | 0,216  | 0,171    |
| TcCLB.511815.24  | hypothetical protein, conserved                           | 0,2159 | 0,03795  |
| TcCLB.508779.50  | hypothetical protein, conserved                           | 0,2158 | 0,02985  |
| TcCLB.504105.80  | hypothetical protein, conserved                           | 0,2157 | 0,01123  |
| TcCLB.510297.90  | hypothetical protein, conserved                           | 0,2156 | 0,01179  |
| TcCLB.511509.30  | protein kinase, putative                                  | 0,2155 | 0,09429  |
| TcCLB.509153.139 | hypothetical protein, conserved                           | 0,2154 | 0,04567  |
| TcCLB.508527.39  | retrotransposon hot spot (RHS) protein, putative, (fragme | 0,2153 | 0,08     |
| TcCLB.503515.14  | ubiquitin-conjugating enzyme E2, putative                 | 0,2153 | 0,1329   |
| TcCLB.510341.10  | hypothetical protein                                      | 0,2153 | 0,2885   |
| TcCLB.510155.70  | heat shock protein 70 (hsp70), putative                   | 0,2152 | 0,01213  |
| TcCLB.507209.10  | small nuclear ribonucleoprotein protein, putative         | 0,2151 | 0,07849  |
| TcCLB.508273.50  | hypothetical protein, conserved                           | 0,215  | 0,09286  |
| TcCLB.508775.40  | trans-sialidase (pseudogene), putative                    | 0,2149 | 0,3278   |

|                   |                                                          |        |         |
|-------------------|----------------------------------------------------------|--------|---------|
| TcCLB.506503.30   | hypothetical protein, conserved                          | 0,2147 | 0,03745 |
| TcCLB.511143.19   | hypothetical protein, conserved                          | 0,2147 | 0,2336  |
| TcCLB.504173.30   | hypothetical protein, conserved                          | 0,2147 | 0,3117  |
| TcCLB.510055.80   | hypothetical protein                                     | 0,2146 | 0,09106 |
| TcCLB.507823.20   | hypothetical protein                                     | 0,2146 | 0,09112 |
| TcCLB.507787.100  | gamma-glutamylcysteine synthetase, putative              | 0,2144 | 0,09772 |
| TcCLB.511277.400  | UDP-galactose transporter                                | 0,2143 | 0,07388 |
| TcCLB.509967.40   | hypothetical protein, conserved                          | 0,2142 | 0,06921 |
| TcCLB.504229.44   | hypothetical protein, conserved (pseudogene)             | 0,2142 | 0,1541  |
| TcCLB.507093.75   | B9 domain-containing protein 2 (b9d2)                    | 0,214  | 0,1651  |
| TcCLB.510285.40   | hypothetical protein, conserved                          | 0,2139 | 0,1893  |
| TcCLB.506659.10   | immunodominant antigen, putative                         | 0,2138 | 0,01707 |
| TcCLB.511211.170  | heat shock protein 70 (hsp70), putative                  | 0,2137 | 0,01188 |
| TcCLB.506577.170  | hypothetical protein, conserved                          | 0,2137 | 0,0958  |
| TcCLB.508741.360  | hypothetical protein, conserved                          | 0,2136 | 0,09429 |
| TcCLB.507823.30   | hypothetical protein, conserved                          | 0,2135 | 0,06304 |
| TcCLB.509017.30   | vacuolar ATP synthase subunit d                          | 0,2135 | 0,07223 |
| TcCLB.506219.30   | exosome component CSL4, putative (CSL4)                  | 0,2135 | 0,1069  |
| TcCLB.503899.50   | RNA-editing complex protein MP100, putative              | 0,2134 | 0,01698 |
| TcCLB.506941.238  | hypothetical protein, conserved                          | 0,2134 | 0,09969 |
| TcCLB.511383.60   | hypothetical protein, conserved                          | 0,2134 | 0,1808  |
| TcCLB.508013.60   | hypothetical protein                                     | 0,2134 | 0,5855  |
| TcCLB.506247.350  | hypothetical protein, conserved                          | 0,2133 | 0,08046 |
| TcCLB.506247.280  | hypothetical protein, conserved                          | 0,2133 | 0,08342 |
| TcCLB.507531.19   | phosphatidylinositol 4-kinase alpha, putative            | 0,2131 | 0,04403 |
| TcCLB.511839.25   | elongation factor 1-gamma (EF-1-gamma, pseudogene),      | 0,2131 | 0,6064  |
| TcCLB.506175.20   | hypothetical protein, conserved                          | 0,213  | 0,02106 |
| TcCLB.509233.200  | hypothetical protein, conserved                          | 0,213  | 0,02724 |
| TcCLB.506919.70   | hypothetical protein, conserved (pseudogene)             | 0,213  | 0,4339  |
| TcCLB.507011.90   | hypothetical protein, conserved                          | 0,2129 | 0,03156 |
| TcCLB.506605.160  | histone acetyltransferase, putative                      | 0,2129 | 0,06441 |
| TcCLB.504057.150  | hypothetical protein, conserved                          | 0,2127 | 0,09632 |
| TcCLB.507277.20   | hypothetical protein, conserved                          | 0,2127 | 0,2856  |
| TcCLB.503453.20   | hypothetical protein, conserved                          | 0,2125 | 0,02307 |
| TcCLB.507013.20   | hypothetical protein, conserved                          | 0,2125 | 0,1054  |
| TcCLB.510879.170  | hypothetical protein, conserved                          | 0,2125 | 0,1607  |
| TcCLB.504491.10   | hypothetical protein                                     | 0,2125 | 0,3417  |
| TcCLB.508153.1000 | hypothetical protein, conserved                          | 0,2124 | 0,1349  |
| TcCLB.506989.80   | hypothetical protein, conserved                          | 0,2124 | 0,1692  |
| TcCLB.508851.110  | hypothetical protein, conserved                          | 0,2123 | 0,279   |
| TcCLB.510759.134  | chaperone DNAJ protein, putative                         | 0,2121 | 0,06552 |
| TcCLB.509777.64   | ADG1-like protein, putative                              | 0,2121 | 0,1554  |
| TcCLB.511589.160  | replication factor C, subunit 4, putative                | 0,2119 | 0,07426 |
| TcCLB.504115.90   | retrotransposon hot spot protein (RHS, pseudogene), puta | 0,2119 | 0,1659  |
| TcCLB.510279.70   | hypothetical protein                                     | 0,2119 | 0,5914  |

|                  |                                                          |        |          |
|------------------|----------------------------------------------------------|--------|----------|
| TcCLB.506871.110 | hypothetical protein, conserved                          | 0,2117 | 0,04888  |
| TcCLB.506563.50  | calpain-like cysteine peptidase (pseudogene), putative   | 0,2117 | 0,07228  |
| TcCLB.509911.10  | hypothetical protein, conserved                          | 0,2115 | 0,02209  |
| TcCLB.507795.100 | mitochondrial ribosomal protein L3, putative             | 0,2115 | 0,03419  |
| TcCLB.511423.130 | hypothetical protein, conserved (pseudogene)             | 0,2115 | 0,1154   |
| TcCLB.511599.61  | hypothetical protein, conserved (pseudogene)             | 0,2115 | 0,2366   |
| TcCLB.511859.80  | hypothetical protein                                     | 0,2112 | 0,1149   |
| TcCLB.510445.20  | chromosomal passenger protein, putative (CPC1)           | 0,2111 | 0,08677  |
| TcCLB.504029.80  | serine/threonine protein phosphatase, putative           | 0,211  | 0,06873  |
| TcCLB.509979.140 | hypothetical protein, conserved                          | 0,2109 | 0,08101  |
| TcCLB.506693.40  | hypothetical protein, conserved                          | 0,2108 | 0,2889   |
| TcCLB.510899.50  | palmitoyl acyltransferase 4, putative                    | 0,2107 | 0,07192  |
| TcCLB.510033.22  | surface protease GP63 (pseudogene), putative             | 0,2102 | 0,1305   |
| TcCLB.507093.30  | hypothetical protein, conserved                          | 0,2101 | 0,04555  |
| TcCLB.511043.30  | DnaJ chaperone protein, putative (TcJ6)                  | 0,21   | 0,0427   |
| TcCLB.505037.20  | ribosomal RNA processing protein 41B, putative (RRP41B)  | 0,21   | 0,0573   |
| TcCLB.503643.39  | hypothetical protein, conserved                          | 0,2099 | 0,1856   |
| TcCLB.506469.20  | hypothetical protein                                     | 0,2097 | 0,05132  |
| TcCLB.509097.36  | surface protease GP63 (pseudogene), putative             | 0,2097 | 0,7519   |
| TcCLB.504935.20  | hypothetical protein, conserved                          | 0,2096 | 0,1064   |
| TcCLB.509997.40  | hypothetical protein, conserved                          | 0,2096 | 0,1182   |
| TcCLB.509499.38  | hypothetical protein, conserved                          | 0,2095 | 0,05245  |
| TcCLB.506201.20  | 60S ribosomal protein L13a, putative                     | 0,2094 | 0,01796  |
| TcCLB.508411.60  | hypothetical protein, conserved                          | 0,2094 | 0,09209  |
| TcCLB.509471.40  | hypothetical protein, conserved                          | 0,2094 | 0,1028   |
| TcCLB.509179.50  | hypothetical protein                                     | 0,2094 | 0,1333   |
| TcCLB.504741.110 | hypothetical protein, conserved                          | 0,2094 | 0,219    |
| TcCLB.509109.180 | hypothetical protein, conserved                          | 0,2093 | 0,09404  |
| TcCLB.508479.90  | hypothetical protein, conserved (pseudogene)             | 0,2091 | 0,07103  |
| TcCLB.410049.20  | hypothetical protein, conserved                          | 0,2091 | 0,2773   |
| TcCLB.508247.60  | hypothetical protein, conserved (pseudogene)             | 0,2091 | 0,4859   |
| TcCLB.509259.129 | hypothetical protein, conserved (pseudogene)             | 0,209  | 0,3406   |
| TcCLB.510689.10  | coatamer alpha subunit (pseudogene), putative            | 0,2088 | 0,0157   |
| TcCLB.470687.9   | hypothetical protein, conserved                          | 0,2088 | 0,1861   |
| TcCLB.511675.6   | hypothetical protein, conserved (pseudogene)             | 0,2087 | 0,6456   |
| TcCLB.508799.170 | 3-methylcrotonoyl-CoA carboxylase beta subunit, putative | 0,2086 | 0,01485  |
| TcCLB.509733.110 | hypothetical protein, conserved                          | 0,2086 | 0,02037  |
| TcCLB.509287.250 | retrotransposon hot spot protein (RHS, pseudogene), puta | 0,2086 | 0,1091   |
| TcCLB.510689.70  | hypothetical protein, conserved                          | 0,2086 | 0,2842   |
| TcCLB.507317.50  | hypothetical protein, conserved                          | 0,2084 | 0,05458  |
| TcCLB.506621.70  | hypothetical protein, conserved                          | 0,2084 | 0,09739  |
| TcCLB.506337.70  | 2-oxoglutarate dehydrogenase E1 component, putative      | 0,2083 | 0,003312 |
| TcCLB.506517.50  | hypothetical protein, conserved                          | 0,2083 | 0,08674  |
| TcCLB.508547.140 | hypothetical protein, conserved                          | 0,2081 | 0,0954   |
| TcCLB.511303.20  | hypothetical protein                                     | 0,208  | 0,08252  |

|                  |                                                           |        |          |
|------------------|-----------------------------------------------------------|--------|----------|
| TcCLB.508869.10  | hypothetical protein                                      | 0,208  | 0,5919   |
| TcCLB.506625.100 | hypothetical protein, conserved                           | 0,2079 | 0,02534  |
| TcCLB.511391.100 | hypothetical protein, conserved                           | 0,2079 | 0,1542   |
| TcCLB.509211.20  | hypothetical protein, conserved                           | 0,2078 | 0,008841 |
| TcCLB.506289.60  | hypothetical protein, conserved                           | 0,2078 | 0,1565   |
| TcCLB.509871.39  | hypothetical protein, conserved (pseudogene)              | 0,2076 | 0,04222  |
| TcCLB.503409.20  | hypothetical protein, conserved                           | 0,2075 | 0,1443   |
| TcCLB.510145.10  | hypothetical protein, conserved                           | 0,2075 | 0,1999   |
| TcCLB.511717.170 | Metalloprotease M41 FtsH, putative                        | 0,2074 | 0,05602  |
| TcCLB.511153.100 | RNA-binding protein, putative                             | 0,2074 | 0,06159  |
| TcCLB.508323.80  | aquaporin, putative                                       | 0,2073 | 0,1749   |
| TcCLB.511727.100 | hypothetical protein, conserved                           | 0,2072 | 0,0433   |
| TcCLB.511211.160 | heat shock protein 70 (hsp70), putative                   | 0,2068 | 0,01562  |
| TcCLB.510943.184 | tyrosine phosphatase, putative                            | 0,2068 | 0,09686  |
| TcCLB.503955.60  | hypothetical protein, conserved                           | 0,2067 | 0,1087   |
| TcCLB.507765.20  | PUF nine target 1                                         | 0,2065 | 0,02798  |
| TcCLB.504081.250 | 90 kDa surface protein, putative                          | 0,2065 | 0,4635   |
| TcCLB.506181.97  | hypothetical protein, conserved                           | 0,2064 | 0,1735   |
| TcCLB.509735.120 | retrotransposon hot spot (RHS) protein, putative          | 0,2063 | 0,03459  |
| TcCLB.508645.30  | dynein light chain, putative                              | 0,2059 | 0,08708  |
| TcCLB.511577.4   | CLC-type chloride channel, putative (fragment)            | 0,2059 | 0,3832   |
| TcCLB.504217.19  | mitochondrial carrier protein, putative                   | 0,2057 | 0,1343   |
| TcCLB.503839.10  | hypothetical protein, conserved                           | 0,2056 | 0,08255  |
| TcCLB.504259.19  | hypothetical protein, conserved                           | 0,2056 | 0,1088   |
| TcCLB.507275.10  | protein kinase, putative                                  | 0,2056 | 0,1864   |
| TcCLB.506351.20  | hypothetical protein, conserved                           | 0,2056 | 0,2527   |
| TcCLB.507875.130 | trans-sialidase (pseudogene), putative                    | 0,2056 | 0,3728   |
| TcCLB.506999.130 | hypothetical protein, conserved                           | 0,2053 | 0,02567  |
| TcCLB.399373.9   | retrotransposon hot spot (RHS) protein, putative (fragmer | 0,2053 | 0,05745  |
| TcCLB.508199.90  | hypothetical protein, conserved                           | 0,2051 | 0,1221   |
| TcCLB.510523.10  | hypothetical protein, conserved (pseudogene)              | 0,205  | 0,1044   |
| TcCLB.509005.40  | hypothetical protein, conserved                           | 0,2048 | 0,05693  |
| TcCLB.511923.110 | aspartate carbamoyltransferase, putative                  | 0,2048 | 0,08532  |
| TcCLB.503779.30  | hypothetical protein, conserved                           | 0,2048 | 0,1835   |
| TcCLB.510401.10  | dispersed gene family protein 1 (DGF-1), putative         | 0,2047 | 0,7407   |
| TcCLB.511621.190 | dual specificity protein phosphatase, putative            | 0,2046 | 0,1885   |
| TcCLB.507831.50  | hypothetical protein, conserved                           | 0,2045 | 0,01487  |
| TcCLB.510659.28  | hypothetical protein, conserved                           | 0,2045 | 0,1343   |
| TcCLB.504115.100 | dispersed gene family protein 1 (DGF-1), putative         | 0,2044 | 0,2193   |
| TcCLB.510729.240 | hypothetical protein, conserved                           | 0,2043 | 0,1309   |
| TcCLB.511277.330 | uracil-DNA glycosylase                                    | 0,2042 | 0,0383   |
| TcCLB.511837.50  | DNA repair protein, putative                              | 0,2042 | 0,1102   |
| TcCLB.511275.20  | hypothetical protein, conserved                           | 0,2041 | 0,05764  |
| TcCLB.510283.130 | hypothetical protein, conserved                           | 0,2041 | 0,1657   |
| TcCLB.508113.7   | trans-sialidase (pseudogene), putative                    | 0,2041 | 0,2736   |

|                  |                                                            |        |         |
|------------------|------------------------------------------------------------|--------|---------|
| TcCLB.508815.30  | DNA repair protein, putative                               | 0,204  | 0,02561 |
| TcCLB.506203.50  | DnaJ chaperone protein, putative                           | 0,2039 | 0,0788  |
| TcCLB.511519.9   | small glutamine-rich tetratricopeptide repeat protein, put | 0,2039 | 0,1552  |
| TcCLB.506181.30  | hypothetical protein, conserved                            | 0,2039 | 0,2771  |
| TcCLB.509199.40  | hypothetical protein, conserved                            | 0,2037 | 0,1715  |
| TcCLB.507049.63  | hypothetical protein, conserved                            | 0,2037 | 0,3138  |
| TcCLB.508045.10  | hypothetical protein, conserved                            | 0,2036 | 0,04221 |
| TcCLB.511903.250 | hypothetical protein, conserved                            | 0,2036 | 0,1263  |
| TcCLB.483009.9   | exonuclease, putative                                      | 0,2035 | 0,08731 |
| TcCLB.511911.98  | hypothetical protein, conserved                            | 0,2035 | 0,09664 |
| TcCLB.506471.90  | dispersed gene family protein 1 (DGF-1, pseudogene), put   | 0,2033 | 0,2195  |
| TcCLB.509121.20  | dispersed gene family protein 1 (DGF-1, pseudogene), put   | 0,2032 | 0,167   |
| TcCLB.505365.80  | retrotransposon hot spot protein (RHS, pseudogene), puta   | 0,2032 | 0,2973  |
| TcCLB.510155.140 | Meckel syndrome type 6 protein, putative (mks6)            | 0,2031 | 0,01134 |
| TcCLB.511307.6   | hypothetical protein, conserved                            | 0,2031 | 0,1774  |
| TcCLB.503847.90  | ABC1 protein, putative                                     | 0,203  | 0,06247 |
| TcCLB.509287.50  | glucose-6-phosphate 1-dehydrogenase, putative              | 0,2029 | 0,0613  |
| TcCLB.509171.29  | RNA pseudouridylate synthase, putative                     | 0,2029 | 0,06342 |
| TcCLB.511515.9   | E3 ubiquitin-protein ligase, putative (fragment)           | 0,2029 | 0,1687  |
| TcCLB.509967.160 | epsilon tubulin, putative                                  | 0,2027 | 0,06459 |
| TcCLB.507933.20  | hypothetical protein, conserved                            | 0,2026 | 0,162   |
| TcCLB.511587.33  | hypothetical protein                                       | 0,2026 | 0,3504  |
| TcCLB.511237.20  | hypothetical protein, conserved                            | 0,2025 | 0,08448 |
| TcCLB.511727.150 | hypothetical protein, conserved                            | 0,2023 | 0,02165 |
| TcCLB.503667.31  | retrotransposon hot spot protein (RHS, pseudogene), puta   | 0,2023 | 0,4575  |
| TcCLB.510841.30  | hypothetical protein                                       | 0,2022 | 0,4001  |
| TcCLB.508379.29  | hypothetical protein, conserved                            | 0,2021 | 0,3247  |
| TcCLB.506481.10  | tRNA pseudouridine synthase A-like protein (pseudogene)    | 0,202  | 0,1401  |
| TcCLB.506513.90  | hypothetical protein, conserved                            | 0,202  | 0,1483  |
| TcCLB.508633.100 | retrotransposon hot spot (RHS) protein, putative           | 0,202  | 0,1489  |
| TcCLB.506339.81  | elongation factor 1-gamma (EF-1-gamma, pseudogene),        | 0,2019 | 0,5118  |
| TcCLB.508857.120 | hypothetical protein, conserved                            | 0,2017 | 0,1304  |
| TcCLB.506435.290 | hypothetical protein, conserved                            | 0,2017 | 0,1823  |
| TcCLB.508777.190 | hypothetical protein, conserved                            | 0,2017 | 0,2096  |
| TcCLB.506625.249 | RNA pseudouridylate synthase protein, putative             | 0,2016 | 0,05456 |
| TcCLB.504185.20  | hypothetical protein, conserved                            | 0,2015 | 0,1004  |
| TcCLB.509419.245 | hypothetical protein, conserved (pseudogene)               | 0,2015 | 0,3814  |
| TcCLB.507849.40  | hypothetical protein, conserved                            | 0,2014 | 0,0196  |
| TcCLB.509119.30  | hypothetical protein, conserved                            | 0,2014 | 0,08423 |
| TcCLB.511577.160 | hypothetical protein, conserved                            | 0,2013 | 0,1173  |
| TcCLB.504137.120 | hypothetical protein, conserved                            | 0,2012 | 0,1125  |
| TcCLB.511903.180 | hypothetical protein, conserved                            | 0,2012 | 0,131   |
| TcCLB.511217.20  | Present in the outer mitochondrial membrane proteome 4     | 0,2011 | 0,09159 |
| TcCLB.506401.350 | hypothetical protein, conserved                            | 0,2011 | 0,1106  |
| TcCLB.503829.10  | hypothetical protein, conserved                            | 0,2008 | 0,1343  |

|                  |                                                           |        |         |
|------------------|-----------------------------------------------------------|--------|---------|
| TcCLB.505009.20  | divalent cation tolerance protein, putative               | 0,2008 | 0,5002  |
| TcCLB.510669.9   | hypothetical protein, conserved                           | 0,2007 | 0,1686  |
| TcCLB.508777.180 | prefoldin subunit 2, putative                             | 0,2006 | 0,09622 |
| TcCLB.511747.14  | hypothetical protein, conserved                           | 0,2006 | 0,1989  |
| TcCLB.479883.10  | hypothetical protein, conserved                           | 0,2004 | 0,165   |
| TcCLB.506355.10  | glucose transporter                                       | 0,2003 | 0,2117  |
| TcCLB.507007.20  | hypothetical protein, conserved                           | 0,2002 | 0,05033 |
| TcCLB.508501.310 | hypothetical protein, conserved                           | 0,2002 | 0,1162  |
| TcCLB.508023.20  | trans-sialidase (pseudogene), putative                    | 0,2001 | 0,3397  |
| TcCLB.504057.145 | cytochrome b5-like Heme/Steroid binding domain contain    | 0,2    | 0,1094  |
| TcCLB.509607.10  | ubiquitin-conjugating enzyme E2, putative                 | 0,1999 | 0,0729  |
| TcCLB.508457.40  | hypothetical protein                                      | 0,1999 | 0,1786  |
| TcCLB.509105.130 | ATP-binding cassette sub-family F member 1, putative (Al  | 0,1997 | 0,01386 |
| TcCLB.509579.40  | hypothetical protein, conserved (pseudogene)              | 0,1997 | 0,2628  |
| TcCLB.508879.170 | mitochondrial RNA binding complex 1 subunit, putative     | 0,1996 | 0,05944 |
| TcCLB.506147.110 | hypothetical protein, conserved                           | 0,1996 | 0,1057  |
| TcCLB.508601.20  | hypothetical protein, conserved                           | 0,1996 | 0,1087  |
| TcCLB.507993.270 | hypothetical protein, conserved                           | 0,1996 | 0,1159  |
| TcCLB.506789.260 | hypothetical protein, conserved                           | 0,1996 | 0,2651  |
| TcCLB.442495.19  | KU70 protein, putative (fragment)                         | 0,1994 | 0,3038  |
| TcCLB.506181.80  | hypothetical protein, conserved                           | 0,1993 | 0,2294  |
| TcCLB.510661.200 | hypothetical protein, conserved                           | 0,1991 | 0,08834 |
| TcCLB.506859.110 | 3'a2rel-related protein, putative                         | 0,1991 | 0,2837  |
| TcCLB.511365.94  | anaphase promoting complex, subunit 10-like protein       | 0,1989 | 0,1672  |
| TcCLB.506171.60  | trans-sialidase, Group II, putative                       | 0,1989 | 0,5035  |
| TcCLB.506531.30  | hypothetical protein, conserved                           | 0,1985 | 0,1233  |
| TcCLB.510517.80  | hypothetical protein, conserved                           | 0,1985 | 0,2973  |
| TcCLB.509551.95  | anaphase promoting complex subunit protein, putative      | 0,1985 | 0,4312  |
| TcCLB.511545.170 | hypothetical protein, conserved                           | 0,1984 | 0,1582  |
| TcCLB.511797.130 | mucin TcMUCII (pseudogene), putative                      | 0,1982 | 0,3675  |
| TcCLB.508873.260 | hypothetical protein                                      | 0,1982 | 0,6844  |
| TcCLB.503513.10  | casein kinase II, alpha chain, putative                   | 0,1981 | 0,1248  |
| TcCLB.508521.112 | beta galactofuranosyl glycosyltransferase (pseudogene), f | 0,1979 | 0,4449  |
| TcCLB.508385.10  | hypothetical protein, conserved                           | 0,1978 | 0,03772 |
| TcCLB.509153.60  | lipin, putative                                           | 0,1977 | 0,02294 |
| TcCLB.510329.80  | hypothetical protein, conserved                           | 0,1975 | 0,03131 |
| TcCLB.511693.100 | long-chain-fatty-acid-CoA ligase, putative                | 0,1974 | 0,02156 |
| TcCLB.506839.20  | hypothetical protein                                      | 0,1974 | 0,04198 |
| TcCLB.508355.270 | hypothetical protein                                      | 0,1974 | 0,08375 |
| TcCLB.506685.50  | myosin heavy chain, putative (fragment)                   | 0,1974 | 0,1912  |
| TcCLB.510579.40  | hypothetical protein, conserved                           | 0,1972 | 0,1614  |
| TcCLB.511771.156 | retrotransposon hot spot protein (RHS, pseudogene), puta  | 0,1972 | 0,1655  |
| TcCLB.511281.56  | sjogren s syndrome nuclear autoantigen 1, putative        | 0,1969 | 0,2035  |
| TcCLB.510719.170 | hypothetical protein, conserved                           | 0,1969 | 0,2088  |
| TcCLB.509641.30  | Ubiquitin-like modifier-activating enzyme ATG7, putative  | 0,1967 | 0,06483 |

|                  |                                                              |        |          |
|------------------|--------------------------------------------------------------|--------|----------|
| TcCLB.509607.60  | hypothetical protein                                         | 0,1966 | 0,04916  |
| TcCLB.507257.170 | hypothetical protein, conserved                              | 0,1966 | 0,1378   |
| TcCLB.511801.10  | hypothetical protein, conserved                              | 0,1965 | 0,02568  |
| TcCLB.509099.70  | endo/exonuclease Mre11, putative                             | 0,1964 | 0,03244  |
| TcCLB.507681.50  | hypothetical protein, conserved                              | 0,1963 | 0,03037  |
| TcCLB.508647.170 | DNA polymerase theta (polymerase domain only), putativ       | 0,1962 | 0,06272  |
| TcCLB.509693.100 | 2-aminoethylphosphonate:pyruvateaminotransferase- like       | 0,1961 | 0,1462   |
| TcCLB.506543.50  | hypothetical protein, conserved                              | 0,1959 | 0,5186   |
| TcCLB.506247.240 | hypothetical protein, conserved                              | 0,1958 | 0,1161   |
| TcCLB.507715.20  | hypothetical protein, conserved                              | 0,1956 | 0,08729  |
| TcCLB.506201.150 | hypothetical protein, conserved                              | 0,1952 | 0,3456   |
| TcCLB.504103.80  | hypothetical protein, conserved                              | 0,1951 | 0,09913  |
| TcCLB.507853.20  | dynein beta chain, flagellar outer arm (pseudogene), puta    | 0,1951 | 0,2058   |
| TcCLB.506637.120 | hypothetical protein, conserved                              | 0,195  | 0,04317  |
| TcCLB.510575.120 | hypothetical protein, conserved                              | 0,195  | 0,1866   |
| TcCLB.506367.174 | hypothetical protein, conserved                              | 0,195  | 0,2803   |
| TcCLB.506713.40  | N-acetyltransferase complex ARD1 subunit, putative           | 0,1949 | 0,295    |
| TcCLB.510315.40  | Putative intraflagellar transport protein C3 (fragment) (PII | 0,1948 | 0,07074  |
| TcCLB.509507.10  | hypothetical protein, conserved                              | 0,1943 | 0,04253  |
| TcCLB.506587.30  | hypothetical protein, conserved                              | 0,1943 | 0,06463  |
| TcCLB.508933.10  | dihydrolipoamide dehydrogenase, putative                     | 0,1942 | 0,1118   |
| TcCLB.505807.120 | lysyl-tRNA synthetase, putative                              | 0,1942 | 0,146    |
| TcCLB.503537.9   | retrotransposon hot spot protein (RHS, pseudogene), puta     | 0,1939 | 0,05267  |
| TcCLB.508641.190 | hypothetical protein, conserved                              | 0,1938 | 0,2281   |
| TcCLB.504173.40  | hypothetical protein                                         | 0,1937 | 0,2529   |
| TcCLB.504579.20  | trans-sialidase (pseudogene), putative                       | 0,1936 | 0,1075   |
| TcCLB.511903.260 | hypothetical protein, conserved                              | 0,1933 | 0,1432   |
| TcCLB.511585.60  | hypothetical protein, conserved                              | 0,1932 | 0,1525   |
| TcCLB.511217.140 | coatmer delta subunit, putative                              | 0,193  | 0,0191   |
| TcCLB.506201.84  | hypothetical protein, conserved                              | 0,193  | 0,217    |
| TcCLB.503459.20  | hypothetical protein, conserved                              | 0,1928 | 0,1116   |
| TcCLB.508169.129 | Mutt-Nudix-related hydrolase 5, putative (Nudix5)            | 0,1928 | 0,2274   |
| TcCLB.507775.50  | proteasome alpha 7 subunit, putative                         | 0,1927 | 0,1249   |
| TcCLB.508645.59  | dynein light chain, putative                                 | 0,1926 | 0,06485  |
| TcCLB.508909.70  | hypothetical protein, conserved                              | 0,1926 | 0,2467   |
| TcCLB.511543.30  | amino acid transporter, putative                             | 0,1925 | 0,3927   |
| TcCLB.508241.120 | rrp44p homologue, putative                                   | 0,1922 | 0,009627 |
| TcCLB.508873.410 | hypothetical protein, conserved                              | 0,1921 | 0,3245   |
| TcCLB.509023.130 | DNA replication licensing factor MCM4, putative (MCM4)       | 0,1918 | 0,08219  |
| TcCLB.509499.29  | hypothetical protein, conserved                              | 0,1918 | 0,2497   |
| TcCLB.510099.20  | hypothetical protein, conserved                              | 0,1917 | 0,1118   |
| TcCLB.510181.110 | hypothetical protein, conserved                              | 0,1917 | 0,1394   |
| TcCLB.511807.110 | GMP synthase [glutamine-hydrolysing] (Gmps)                  | 0,1916 | 0,0143   |
| TcCLB.511507.30  | cyclosome subunit, putative                                  | 0,1916 | 0,05877  |
| TcCLB.508873.425 | elongation factor 1-gamma (EF-1-gamma, pseudogene),          | 0,1915 | 0,1934   |

|                  |                                                          |        |         |
|------------------|----------------------------------------------------------|--------|---------|
| TcCLB.511577.10  | hypothetical protein, conserved                          | 0,1913 | 0,3486  |
| TcCLB.506241.40  | hypothetical protein, conserved                          | 0,1912 | 0,107   |
| TcCLB.508461.110 | hypothetical protein, conserved                          | 0,1911 | 0,1033  |
| TcCLB.506323.40  | trans-sialidase (pseudogene), putative                   | 0,1911 | 0,1554  |
| TcCLB.511371.10  | retrotransposon hot spot (RHS) protein, putative         | 0,1909 | 0,1227  |
| TcCLB.507881.20  | retrotransposon hot spot (RHS) protein, putative         | 0,1908 | 0,05074 |
| TcCLB.508693.160 | hypothetical protein, conserved                          | 0,1908 | 0,08811 |
| TcCLB.509775.49  | ribosomal protein L2, putative                           | 0,1907 | 0,384   |
| TcCLB.510731.130 | hypothetical protein, conserved                          | 0,1906 | 0,4282  |
| TcCLB.508599.10  | hypothetical protein, conserved (pseudogene)             | 0,1906 | 0,6517  |
| TcCLB.504137.20  | hypothetical protein, conserved                          | 0,1905 | 0,07642 |
| TcCLB.503833.69  | ribosome biogenesis protein, putative (fragment)         | 0,1905 | 0,1935  |
| TcCLB.511585.150 | Meckel syndrome type 6 protein, putative (mks6)          | 0,1904 | 0,04089 |
| TcCLB.510121.60  | hypothetical protein, conserved                          | 0,1904 | 0,1384  |
| TcCLB.511127.340 | tyrosine phosphatase, putative                           | 0,1903 | 0,06664 |
| TcCLB.503499.10  | hypothetical protein, conserved                          | 0,1902 | 0,05148 |
| TcCLB.509601.40  | hypothetical protein, conserved                          | 0,1902 | 0,06568 |
| TcCLB.503935.10  | dolichyl-lipid chaperone, putative (rft1)                | 0,1902 | 0,1379  |
| TcCLB.449247.20  | hypothetical protein, conserved                          | 0,1902 | 0,3098  |
| TcCLB.511621.140 | hypothetical protein, conserved                          | 0,1901 | 0,1353  |
| TcCLB.506227.80  | mitochondrial DNA polymerase I protein B, putative (POLI | 0,19   | 0,03167 |
| TcCLB.509085.120 | retrotransposon hot spot (RHS) protein, putative         | 0,19   | 0,2393  |
| TcCLB.509265.36  | ATP-dependent DEAD/H RNA helicase (pseudogene), puta     | 0,1899 | 0,5082  |
| TcCLB.510933.180 | syntaxin binding protein (pseudogene), putative          | 0,1899 | 0,6224  |
| TcCLB.507047.120 | myo-inositol-1(or 4)-monophosphatase 1, putative         | 0,1898 | 0,1819  |
| TcCLB.507941.50  | hypothetical protein, conserved                          | 0,1897 | 0,07114 |
| TcCLB.509429.100 | PITH domain-containing protein                           | 0,1896 | 0,1244  |
| TcCLB.507875.50  | hypothetical protein                                     | 0,1896 | 0,3683  |
| TcCLB.503431.90  | hypothetical protein, conserved                          | 0,1895 | 0,1269  |
| TcCLB.508951.50  | calmodulin, putative                                     | 0,1895 | 0,3139  |
| TcCLB.424771.10  | retrotransposon hot spot (RHS) protein, putative         | 0,1894 | 0,4826  |
| TcCLB.510729.230 | hypothetical protein, conserved                          | 0,1893 | 0,05828 |
| TcCLB.506989.160 | PTS2 receptor, putative (PEX7)                           | 0,1893 | 0,08808 |
| TcCLB.510657.160 | Double RNA binding domain protein 9 (DRBD9)              | 0,1891 | 0,1642  |
| TcCLB.503703.70  | Mitochondrial SSU ribosomal protein, putative            | 0,189  | 0,04757 |
| TcCLB.511353.50  | hypothetical protein, conserved                          | 0,189  | 0,2097  |
| TcCLB.506557.24  | hypothetical protein, conserved                          | 0,189  | 0,2938  |
| TcCLB.506825.90  | hypothetical protein, conserved                          | 0,1888 | 0,03444 |
| TcCLB.507851.70  | hypothetical protein                                     | 0,1888 | 0,09223 |
| TcCLB.503903.10  | hypothetical protein                                     | 0,1888 | 0,2234  |
| TcCLB.510317.30  | polynucleotide adenylyltransferase, putative (PAP)       | 0,1888 | 0,2801  |
| TcCLB.511881.20  | serine/threonine-protein phosphatase                     | 0,1887 | 0,1306  |
| TcCLB.503703.50  | copper-transporting ATPase-like protein, putative        | 0,1886 | 0,03653 |
| TcCLB.510359.10  | hypothetical protein, conserved                          | 0,1886 | 0,3111  |
| TcCLB.504045.114 | hypothetical protein, conserved                          | 0,1886 | 0,3169  |



|                  |                                                              |        |         |
|------------------|--------------------------------------------------------------|--------|---------|
| TcCLB.511677.10  | dispersed gene family protein 1 (DGF-1), putative            | 0,1884 | 0,2192  |
| TcCLB.510575.20  | hypothetical protein, conserved                              | 0,1884 | 0,2464  |
| TcCLB.511153.120 | pantothenate kinase subunit, putative                        | 0,1883 | 0,09855 |
| TcCLB.509395.70  | hypothetical protein, conserved                              | 0,1883 | 0,1246  |
| TcCLB.504797.50  | hypothetical protein, conserved                              | 0,1882 | 0,08528 |
| TcCLB.507979.40  | hypothetical protein, conserved                              | 0,1882 | 0,3728  |
| TcCLB.511511.80  | tubulin-tyrosine ligase-like protein, putative               | 0,1881 | 0,1023  |
| TcCLB.425597.10  | trans-sialidase (pseudogene), putative                       | 0,1881 | 0,5398  |
| TcCLB.503903.20  | hypothetical protein, conserved                              | 0,188  | 0,1772  |
| TcCLB.507257.90  | hypothetical protein, conserved                              | 0,1879 | 0,1875  |
| TcCLB.510153.5   | hypothetical protein, conserved                              | 0,1876 | 0,4766  |
| TcCLB.511495.20  | hypothetical protein, conserved                              | 0,1875 | 0,1302  |
| TcCLB.508273.130 | hypothetical protein                                         | 0,1875 | 0,5484  |
| TcCLB.503515.20  | Kinetoplastid RNA editing protein 1, putative (KREPA1)       | 0,1874 | 0,04022 |
| TcCLB.450019.9   | dispersed gene family protein 1 (DGF-1), putative (fragm     | 0,1874 | 0,2759  |
| TcCLB.507519.180 | hypothetical protein, conserved                              | 0,1873 | 0,1399  |
| TcCLB.508675.20  | DNA excision repair protein, putative                        | 0,1871 | 0,04914 |
| TcCLB.507005.30  | hypothetical protein, conserved                              | 0,187  | 0,1158  |
| TcCLB.507509.89  | cleavage and polyadenylation specificity factor-like protein | 0,1869 | 0,07521 |
| TcCLB.508029.20  | ubiquitin-protein ligase, putative                           | 0,1869 | 0,2054  |
| TcCLB.508641.330 | pre-mRNA splicing factor, putative                           | 0,1868 | 0,33    |
| TcCLB.509211.30  | serine/threonine protein phosphatase, putative               | 0,1866 | 0,1924  |
| TcCLB.506349.10  | protein kinase, putative                                     | 0,1866 | 0,6153  |
| TcCLB.510353.10  | major vault protein, putative                                | 0,1865 | 0,01959 |
| TcCLB.510657.140 | hypothetical protein, conserved                              | 0,1865 | 0,1508  |
| TcCLB.511445.100 | hypothetical protein, conserved                              | 0,1863 | 0,07068 |
| TcCLB.510181.30  | ATP-dependent DEAD/H RNA helicase, putative                  | 0,1863 | 0,1404  |
| TcCLB.506693.10  | hypothetical protein                                         | 0,1863 | 0,1696  |
| TcCLB.509965.300 | hypothetical protein, conserved                              | 0,1862 | 0,3138  |
| TcCLB.503487.20  | hypothetical protein                                         | 0,1861 | 0,08807 |
| TcCLB.507467.30  | hypothetical protein, conserved                              | 0,1861 | 0,269   |
| TcCLB.506755.20  | paraflagellar rod component, putative                        | 0,1858 | 0,1076  |
| TcCLB.510719.200 | telomerase reverse transcriptase, putative (TERT)            | 0,1857 | 0,1308  |
| TcCLB.503667.20  | hypothetical protein                                         | 0,1857 | 0,5965  |
| TcCLB.510645.49  | ribosomal protein L3 mitochondrial, putative                 | 0,1856 | 0,2847  |
| TcCLB.503485.20  | hypothetical protein, conserved (pseudogene)                 | 0,1855 | 0,2955  |
| TcCLB.509207.100 | hypothetical protein, conserved                              | 0,1853 | 0,09908 |
| TcCLB.506887.110 | hypothetical protein, conserved (pseudogene)                 | 0,1853 | 0,2197  |
| TcCLB.511439.60  | hypothetical protein, conserved                              | 0,1853 | 0,2263  |
| TcCLB.510769.120 | calcium motive p-type ATPase, putative                       | 0,1852 | 0,04428 |
| TcCLB.510613.10  | hypothetical protein, conserved                              | 0,1852 | 0,157   |
| TcCLB.510735.40  | hypothetical protein, conserved                              | 0,1851 | 0,06486 |
| TcCLB.507047.134 | hypothetical protein, conserved                              | 0,185  | 0,4373  |
| TcCLB.511817.310 | hypothetical protein, conserved                              | 0,1849 | 0,02954 |
| TcCLB.408437.10  | hypothetical protein, conserved                              | 0,1849 | 0,09701 |

|                  |                                                              |        |         |
|------------------|--------------------------------------------------------------|--------|---------|
| TcCLB.511821.140 | hypothetical protein, conserved                              | 0,1849 | 0,1263  |
| TcCLB.507851.20  | hypothetical protein, conserved                              | 0,1849 | 0,151   |
| TcCLB.504105.210 | Translation factor GUF1, mitochondrial, putative (GUF1)      | 0,1846 | 0,05063 |
| TcCLB.510359.420 | mucin-associated surface protein (MASP, pseudogene), p       | 0,1845 | 0,3223  |
| TcCLB.510461.25  | elongation factor 1-gamma (EF-1-gamma, pseudogene),          | 0,1845 | 0,7002  |
| TcCLB.508153.980 | hypothetical protein, conserved                              | 0,1843 | 0,0385  |
| TcCLB.509331.134 | trypanothione synthetase, putative                           | 0,1843 | 0,2278  |
| TcCLB.507007.60  | hypothetical protein, conserved                              | 0,1843 | 0,2295  |
| TcCLB.509937.30  | phosphatidylserine synthase, putative                        | 0,1842 | 0,1758  |
| TcCLB.511245.70  | hypothetical protein, conserved                              | 0,184  | 0,09723 |
| TcCLB.506629.10  | intraflagellar transport protein 88, putative (fragment) (IF | 0,1839 | 0,2284  |
| TcCLB.505183.140 | protein kinase, putative                                     | 0,1838 | 0,07153 |
| TcCLB.506529.260 | chaperone DNAJ protein, putative                             | 0,1838 | 0,08288 |
| TcCLB.508827.120 | hypothetical protein, conserved                              | 0,1838 | 0,1652  |
| TcCLB.510101.340 | hypothetical protein, conserved                              | 0,1837 | 0,01635 |
| TcCLB.511733.100 | hypothetical protein, conserved                              | 0,1836 | 0,09069 |
| TcCLB.508641.80  | hypothetical protein, conserved                              | 0,1836 | 0,1586  |
| TcCLB.510429.24  | hypothetical protein, conserved                              | 0,1836 | 0,3279  |
| TcCLB.509207.110 | hypothetical protein, conserved                              | 0,1835 | 0,1858  |
| TcCLB.508543.170 | hypothetical protein, conserved                              | 0,1834 | 0,04831 |
| TcCLB.509573.30  | flagellar protofilament ribbon protein, putative             | 0,1833 | 0,05022 |
| TcCLB.508827.20  | hypothetical protein, conserved                              | 0,1833 | 0,1893  |
| TcCLB.510663.10  | hypothetical protein, conserved                              | 0,183  | 0,3238  |
| TcCLB.506337.120 | hypothetical protein, conserved                              | 0,1829 | 0,2418  |
| TcCLB.509151.120 | hypothetical protein, conserved                              | 0,1826 | 0,1311  |
| TcCLB.506931.40  | hypothetical protein, conserved                              | 0,1825 | 0,08019 |
| TcCLB.508541.210 | hypothetical protein, conserved                              | 0,1825 | 0,09567 |
| TcCLB.511575.100 | protein transport protein SEC23, putative                    | 0,1824 | 0,03392 |
| TcCLB.453445.10  | hypothetical protein, conserved                              | 0,1824 | 0,04718 |
| TcCLB.511505.10  | RNA pseudouridylate synthase, putative                       | 0,1823 | 0,09323 |
| TcCLB.509799.90  | hypothetical protein, conserved                              | 0,1822 | 0,2081  |
| TcCLB.507003.70  | hypothetical protein, conserved                              | 0,1822 | 0,2618  |
| TcCLB.504081.26  | hypothetical protein                                         | 0,1822 | 0,4669  |
| TcCLB.508139.150 | hypothetical protein, conserved                              | 0,1821 | 0,4249  |
| TcCLB.510297.60  | zinc transporter, putative                                   | 0,1819 | 0,1521  |
| TcCLB.510507.60  | inositol 1,4,5-trisphosphate receptor, putative (fragment)   | 0,1818 | 0,05703 |
| TcCLB.510095.40  | retrotransposon hot spot protein (RHS, pseudogene), puta     | 0,1817 | 0,2243  |
| TcCLB.506653.50  | elongation factor 1-gamma (EF-1-gamma, pseudogene),          | 0,1817 | 0,5883  |
| TcCLB.507711.260 | hypothetical protein, conserved                              | 0,1816 | 0,0662  |
| TcCLB.511249.90  | hypothetical protein, conserved                              | 0,1816 | 0,09284 |
| TcCLB.511727.199 | CYC2-like cyclin 6, putative (CYC6)                          | 0,1815 | 0,1454  |
| TcCLB.511621.259 | hypothetical protein, conserved                              | 0,1815 | 0,3332  |
| TcCLB.506525.80  | N-myristoyl transferase, putative                            | 0,1813 | 0,1767  |
| TcCLB.507009.100 | cyclophilin, putative                                        | 0,1813 | 0,2185  |
| TcCLB.506831.50  | hypothetical protein, conserved                              | 0,1812 | 0,08623 |

|                  |                                                              |        |         |
|------------------|--------------------------------------------------------------|--------|---------|
| TcCLB.507641.260 | chaperonin HSP60, mitochondrial precursor (pseudogene)       | 0,1811 | 0,2311  |
| TcCLB.511711.90  | cop-coated vesicle membrane protein p24 precursor, puta      | 0,181  | 0,05828 |
| TcCLB.508503.40  | hypothetical protein, conserved                              | 0,181  | 0,08924 |
| TcCLB.511925.40  | hypothetical protein, conserved                              | 0,1809 | 0,3787  |
| TcCLB.506563.130 | calpain-like cysteine peptidase (pseudogene), putative       | 0,1807 | 0,1329  |
| TcCLB.507395.10  | dihydroceramide synthase, putative (DHCS)                    | 0,1806 | 0,113   |
| TcCLB.504185.9   | hypothetical protein, conserved                              | 0,1806 | 0,4598  |
| TcCLB.504689.60  | dispersed gene family protein 1 (DGF-1), putative            | 0,1806 | 0,4695  |
| TcCLB.506513.80  | hypothetical protein, conserved                              | 0,1805 | 0,1575  |
| TcCLB.507857.60  | Dynein intermediate chain 1, axonemal (DNAI1)                | 0,1805 | 0,1963  |
| TcCLB.511507.39  | intraflagellar transport (IFT) protein, putative (IFT20)     | 0,1805 | 0,2236  |
| TcCLB.509127.40  | hypothetical protein, conserved                              | 0,1804 | 0,148   |
| TcCLB.506649.100 | tRNA nucleotidyltransferase, putative                        | 0,1803 | 0,08577 |
| TcCLB.510259.40  | hypothetical protein, conserved                              | 0,1802 | 0,4051  |
| TcCLB.507519.130 | Mini-chromosome maintenance complex-binding protein          | 0,1801 | 0,1015  |
| TcCLB.506845.60  | retrotransposon hot spot (RHS) protein, putative             | 0,1799 | 0,5191  |
| TcCLB.508389.10  | hypothetical protein, conserved                              | 0,1798 | 0,06524 |
| TcCLB.506895.10  | hypothetical protein, conserved                              | 0,1798 | 0,2073  |
| TcCLB.507767.10  | succinyl-CoA ligase [GDP-forming] beta-chain, putative       | 0,1797 | 0,02152 |
| TcCLB.511425.19  | hypothetical protein, conserved (pseudogene)                 | 0,1797 | 0,2072  |
| TcCLB.508415.10  | hypothetical protein, conserved (pseudogene)                 | 0,1797 | 0,3176  |
| TcCLB.510073.10  | cysteine peptidase (N-terminal), putative                    | 0,1796 | 0,3884  |
| TcCLB.506821.90  | hypothetical protein, conserved                              | 0,1795 | 0,1238  |
| TcCLB.506195.100 | malate dehydrogenase (pseudogene), putative                  | 0,1794 | 0,1972  |
| TcCLB.511767.60  | trans-sialidase (pseudogene), putative                       | 0,1793 | 0,1155  |
| TcCLB.508413.60  | hypothetical protein, conserved                              | 0,1793 | 0,1816  |
| TcCLB.511693.50  | hypothetical protein, conserved                              | 0,1792 | 0,08133 |
| TcCLB.503495.5   | hypothetical protein                                         | 0,1792 | 0,4398  |
| TcCLB.506401.80  | hypothetical protein, conserved                              | 0,1791 | 0,03634 |
| TcCLB.511727.70  | hypothetical protein, conserved                              | 0,179  | 0,06894 |
| TcCLB.509053.20  | hypothetical protein, conserved                              | 0,179  | 0,1036  |
| TcCLB.508357.23  | hypothetical protein, conserved                              | 0,1789 | 0,2346  |
| TcCLB.511737.6   | hypothetical protein, conserved                              | 0,1789 | 0,2828  |
| TcCLB.511041.50  | flagellum transition zone component, putative                | 0,1788 | 0,01872 |
| TcCLB.506529.310 | hypothetical protein, conserved                              | 0,1788 | 0,1166  |
| TcCLB.509831.50  | intraflagellar transport protein 88, putative (fragment) (IF | 0,1788 | 0,1883  |
| TcCLB.506705.20  | adenosine kinase, putative                                   | 0,1788 | 0,353   |
| TcCLB.508405.110 | hypothetical protein, conserved                              | 0,1787 | 0,1686  |
| TcCLB.509379.10  | dihydrolipoamide dehydrogenase, putative (GCVL-1)            | 0,1787 | 0,1756  |
| TcCLB.510167.29  | exosome complex exonuclease, putative                        | 0,1787 | 0,2044  |
| TcCLB.508641.180 | RNA-binding protein 38, putative (RBP38)                     | 0,1786 | 0,0835  |
| TcCLB.506629.120 | hypothetical protein, conserved                              | 0,1786 | 0,1284  |
| TcCLB.509169.39  | protein kinase, putative                                     | 0,1786 | 0,3759  |
| TcCLB.506435.50  | hypothetical protein, conserved                              | 0,1785 | 0,2518  |
| TcCLB.508995.20  | Tubulin/FtsZ family, putative                                | 0,1781 | 0,07659 |

|                  |                                                          |        |         |
|------------------|----------------------------------------------------------|--------|---------|
| TcCLB.511249.40  | hypothetical protein, conserved                          | 0,178  | 0,169   |
| TcCLB.507735.60  | hypothetical protein, conserved                          | 0,1779 | 0,09862 |
| TcCLB.506713.70  | retrotransposon hot spot protein (RHS, pseudogene), puta | 0,1779 | 0,1826  |
| TcCLB.505555.20  | hypothetical protein, conserved                          | 0,1779 | 0,2473  |
| TcCLB.506367.80  | hypothetical protein                                     | 0,1778 | 0,4059  |
| TcCLB.505037.140 | retrotransposon hot spot protein (RHS, pseudogene), puta | 0,1777 | 0,2456  |
| TcCLB.510299.79  | protein phosphatase 2C, putative                         | 0,1776 | 0,146   |
| TcCLB.508153.860 | hypothetical protein, conserved                          | 0,1775 | 0,05411 |
| TcCLB.506517.130 | hypothetical protein, conserved                          | 0,1773 | 0,09148 |
| TcCLB.508515.80  | hypothetical protein, conserved                          | 0,1773 | 0,1588  |
| TcCLB.511045.29  | hypothetical protein, conserved                          | 0,1772 | 0,1015  |
| TcCLB.508679.7   | hypothetical protein, conserved (pseudogene)             | 0,1772 | 0,5635  |
| TcCLB.504883.40  | hypothetical protein, conserved                          | 0,1771 | 0,07628 |
| TcCLB.504867.114 | tyrosine phosphatase, putative                           | 0,1771 | 0,1915  |
| TcCLB.510143.90  | hypothetical protein, conserved                          | 0,1771 | 0,2025  |
| TcCLB.509569.160 | hypothetical protein, conserved                          | 0,177  | 0,1401  |
| TcCLB.511719.20  | hypothetical protein, conserved                          | 0,1769 | 0,2381  |
| TcCLB.511869.9   | dynein heavy chain, putative (fragment)                  | 0,1768 | 0,1425  |
| TcCLB.510145.50  | hypothetical protein, conserved                          | 0,1766 | 0,05292 |
| TcCLB.509891.50  | hypothetical protein, conserved                          | 0,1766 | 0,3006  |
| TcCLB.510359.250 | hypothetical protein, conserved                          | 0,1766 | 0,493   |
| TcCLB.506737.60  | hypothetical protein, conserved                          | 0,1765 | 0,3957  |
| TcCLB.506717.200 | hypothetical protein, conserved                          | 0,1765 | 0,4159  |
| TcCLB.508461.530 | hypothetical protein, conserved                          | 0,1764 | 0,09632 |
| TcCLB.507653.110 | trans-sialidase (pseudogene), putative                   | 0,1764 | 0,173   |
| TcCLB.506777.110 | hypothetical protein, conserved                          | 0,1763 | 0,1639  |
| TcCLB.505997.40  | hypothetical protein, conserved (pseudogene)             | 0,1763 | 0,1695  |
| TcCLB.511705.20  | putative prolyl carboxypeptidase, putative               | 0,1763 | 0,3298  |
| TcCLB.509247.10  | hypothetical protein, conserved                          | 0,1762 | 0,1991  |
| TcCLB.508543.70  | hypothetical protein, conserved                          | 0,1762 | 0,2236  |
| TcCLB.507047.100 | hypothetical protein, conserved                          | 0,1759 | 0,09095 |
| TcCLB.506449.30  | retrotransposon hot spot protein (RHS, pseudogene), puta | 0,1758 | 0,4831  |
| TcCLB.511899.30  | hypothetical protein, conserved                          | 0,1756 | 0,09424 |
| TcCLB.511859.30  | hypothetical protein, conserved                          | 0,1756 | 0,1979  |
| TcCLB.506491.20  | myosin heavy chain, putative                             | 0,1755 | 0,04489 |
| TcCLB.509747.10  | hypothetical protein, conserved                          | 0,1754 | 0,306   |
| TcCLB.507539.20  | hypothetical protein, conserved                          | 0,1754 | 0,4653  |
| TcCLB.507521.50  | proteasome beta 6 subunit, putative                      | 0,175  | 0,1178  |
| TcCLB.507099.50  | programmed cell death 6 protein-like, putative           | 0,1749 | 0,127   |
| TcCLB.510289.40  | GPI inositol deacylase precursor, putative               | 0,1749 | 0,1495  |
| TcCLB.509233.239 | hypothetical protein, conserved                          | 0,1747 | 0,3762  |
| TcCLB.509595.50  | DIS3-like exonuclease, putative                          | 0,1746 | 0,08115 |
| TcCLB.506705.10  | hypothetical protein                                     | 0,1746 | 0,1511  |
| TcCLB.506989.50  | hypothetical protein, conserved                          | 0,1746 | 0,1759  |
| TcCLB.504057.140 | ADP/ATP mitochondrial carrier protein, putative          | 0,1745 | 0,0726  |

|                  |                                                          |        |         |
|------------------|----------------------------------------------------------|--------|---------|
| TcCLB.504147.40  | Mitochondrial N(5)-glutamine methyltransferase MTQ1, p   | 0,1745 | 0,07692 |
| TcCLB.510009.10  | hypothetical protein, conserved                          | 0,1742 | 0,4857  |
| TcCLB.508139.135 | retrotransposon hot spot protein (RHS, pseudogene), puta | 0,174  | 0,2158  |
| TcCLB.506629.190 | hypothetical protein, conserved                          | 0,1739 | 0,1149  |
| TcCLB.510861.40  | hypothetical protein, conserved                          | 0,1738 | 0,1777  |
| TcCLB.506343.20  | dispersed gene family protein 1 (DGF-1, pseudogene), put | 0,1738 | 0,4922  |
| TcCLB.503879.30  | hypothetical protein, conserved                          | 0,1737 | 0,122   |
| TcCLB.509019.10  | trans-sialidase (pseudogene), putative                   | 0,1737 | 0,1355  |
| TcCLB.508169.50  | hypothetical protein, conserved                          | 0,1735 | 0,1373  |
| TcCLB.508059.30  | hypothetical protein, conserved                          | 0,1734 | 0,1411  |
| TcCLB.511317.40  | hypothetical protein, conserved                          | 0,1734 | 0,1483  |
| TcCLB.507837.60  | Suppressor of G2 allele of SKP1, putative                | 0,1734 | 0,1819  |
| TcCLB.509053.110 | ubiquitin fusion degradation protein 2, putative         | 0,1733 | 0,02374 |
| TcCLB.508667.49  | small nuclear ribonucleoprotein SmD2, putative           | 0,1733 | 0,1871  |
| TcCLB.507907.50  | hypothetical protein, conserved                          | 0,1732 | 0,01959 |
| TcCLB.506537.130 | protein kinase, putative                                 | 0,1732 | 0,4899  |
| TcCLB.509429.110 | proteasome beta-1 subunit, putative                      | 0,1731 | 0,07526 |
| TcCLB.504037.20  | hypothetical protein, conserved                          | 0,1731 | 0,09721 |
| TcCLB.414145.9   | hypothetical protein, conserved (fragment)               | 0,1731 | 0,2476  |
| TcCLB.508609.20  | hypothetical protein                                     | 0,1731 | 0,2856  |
| TcCLB.442287.10  | serine/threonine protein phosphatase (pseudogene), puta  | 0,173  | 0,08872 |
| TcCLB.511861.90  | retrotransposon hot spot (RHS) protein, putative         | 0,1729 | 0,2026  |
| TcCLB.504003.40  | hypothetical protein, conserved                          | 0,1728 | 0,08445 |
| TcCLB.504033.120 | hypothetical protein, conserved                          | 0,1728 | 0,09152 |
| TcCLB.503887.30  | hypothetical protein, conserved                          | 0,1727 | 0,1074  |
| TcCLB.503943.20  | hypothetical protein, conserved                          | 0,1726 | 0,04973 |
| TcCLB.506977.120 | hypothetical protein, conserved                          | 0,1726 | 0,1289  |
| TcCLB.507747.260 | hypothetical protein, conserved                          | 0,1726 | 0,143   |
| TcCLB.511751.200 | epsilon-adaptin, putative                                | 0,1725 | 0,07526 |
| TcCLB.509853.10  | mannosyl-oligosaccharide 1,2-alpha-mannosidase IB, put   | 0,1722 | 0,1225  |
| TcCLB.507991.30  | hypothetical protein, conserved                          | 0,1722 | 0,1939  |
| TcCLB.509213.110 | hypothetical protein, conserved                          | 0,1721 | 0,06155 |
| TcCLB.511911.120 | DNA polymerase eta, putative                             | 0,1719 | 0,1358  |
| TcCLB.507711.180 | hypothetical protein, conserved                          | 0,1719 | 0,1678  |
| TcCLB.503487.60  | hypothetical protein, conserved                          | 0,1719 | 0,2314  |
| TcCLB.508175.160 | deoxyuridine triphosphatase, putative                    | 0,1718 | 0,1792  |
| TcCLB.504635.20  | hypothetical protein, conserved                          | 0,1718 | 0,2236  |
| TcCLB.509663.25  | hypothetical protein, conserved (pseudogene)             | 0,1717 | 0,4375  |
| TcCLB.507773.50  | hypothetical protein, conserved                          | 0,1716 | 0,09978 |
| TcCLB.511857.50  | actin-like protein, putative                             | 0,1714 | 0,1392  |
| TcCLB.510187.260 | hypothetical protein, conserved                          | 0,1714 | 0,161   |
| TcCLB.507587.50  | hypothetical protein                                     | 0,1712 | 0,7084  |
| TcCLB.508879.10  | hypothetical protein, conserved                          | 0,1711 | 0,1544  |
| TcCLB.508837.80  | Flagellar Member 3 (FLAM3)                               | 0,171  | 0,09797 |
| TcCLB.507811.90  | hypothetical protein, conserved                          | 0,171  | 0,1237  |

|                  |                                                        |        |         |
|------------------|--------------------------------------------------------|--------|---------|
| TcCLB.510359.190 | hypothetical protein, conserved                        | 0,171  | 0,3027  |
| TcCLB.511825.250 | hypothetical protein, conserved                        | 0,1709 | 0,2817  |
| TcCLB.504013.11  | ribosomal protein L13, putative (fragment)             | 0,1708 | 0,0196  |
| TcCLB.511773.30  | hypothetical protein                                   | 0,1708 | 0,3839  |
| TcCLB.507663.40  | hypothetical protein, conserved                        | 0,1708 | 0,4116  |
| TcCLB.508951.60  | hypothetical protein, conserved                        | 0,1707 | 0,175   |
| TcCLB.508541.30  | hypothetical protein                                   | 0,1705 | 0,736   |
| TcCLB.509149.70  | hypothetical protein, conserved                        | 0,1703 | 0,1148  |
| TcCLB.506863.50  | ribosomal RNA processing protein 45, putative (RRP45)  | 0,1703 | 0,2887  |
| TcCLB.506275.70  | hypothetical protein, conserved                        | 0,1701 | 0,1731  |
| TcCLB.506321.310 | phosphoribosylpyrophosphate synthetase, putative       | 0,17   | 0,04344 |
| TcCLB.469435.4   | ribosomal protein L14, putative                        | 0,1699 | 0,3484  |
| TcCLB.507997.89  | hypothetical protein, conserved                        | 0,1699 | 0,439   |
| TcCLB.508857.90  | hypothetical protein, conserved                        | 0,1696 | 0,1207  |
| TcCLB.511517.140 | hypothetical protein                                   | 0,1696 | 0,1989  |
| TcCLB.510797.30  | hypothetical protein, conserved                        | 0,1696 | 0,2077  |
| TcCLB.510777.10  | hypothetical protein, conserved                        | 0,1696 | 0,269   |
| TcCLB.420495.19  | hypothetical protein, conserved (pseudogene)           | 0,1696 | 0,4894  |
| TcCLB.508891.40  | hypothetical protein, conserved                        | 0,1695 | 0,1366  |
| TcCLB.511847.89  | hypothetical protein, conserved                        | 0,1695 | 0,4007  |
| TcCLB.510089.219 | diacylglycerol acyltransferase, putative               | 0,1693 | 0,2533  |
| TcCLB.510101.440 | hypothetical protein, conserved                        | 0,1692 | 0,1916  |
| TcCLB.509643.80  | DNA mismatch repair protein MSH2, putative (MSH2)      | 0,1689 | 0,05852 |
| TcCLB.510325.45  | hypothetical protein                                   | 0,1689 | 0,1487  |
| TcCLB.508515.50  | glycogenin glucosyltransferase, putative               | 0,1689 | 0,3722  |
| TcCLB.508027.94  | hypothetical protein, conserved                        | 0,1688 | 0,1947  |
| TcCLB.509099.170 | hypothetical protein, conserved                        | 0,1687 | 0,3395  |
| TcCLB.506321.230 | hypothetical protein                                   | 0,1687 | 0,5327  |
| TcCLB.506357.110 | hypothetical protein, conserved                        | 0,1683 | 0,1517  |
| TcCLB.506625.84  | hypothetical protein, conserved                        | 0,168  | 0,267   |
| TcCLB.508641.210 | hypothetical protein, conserved                        | 0,1679 | 0,288   |
| TcCLB.508879.20  | hypothetical protein                                   | 0,1677 | 0,3573  |
| TcCLB.510311.130 | DNA repair helicase, putative                          | 0,1676 | 0,109   |
| TcCLB.506633.100 | hypothetical protein, conserved                        | 0,1676 | 0,2572  |
| TcCLB.510517.20  | hypothetical protein, conserved                        | 0,1675 | 0,3154  |
| TcCLB.508879.100 | hypothetical protein, conserved                        | 0,1674 | 0,05622 |
| TcCLB.504193.41  | N-acetyltransferase complex ARD1 subunit (pseudogene), | 0,1674 | 0,3436  |
| TcCLB.504163.20  | hypothetical protein, conserved                        | 0,1672 | 0,1403  |
| TcCLB.508355.310 | hypothetical protein, conserved                        | 0,1671 | 0,1033  |
| TcCLB.509745.60  | telomerase reverse transcriptase, putative (TERT)      | 0,1666 | 0,1437  |
| TcCLB.511279.20  | hypothetical protein, conserved                        | 0,1665 | 0,1604  |
| TcCLB.509537.80  | hypothetical protein, conserved                        | 0,1664 | 0,0345  |
| TcCLB.511391.140 | alpha-adaptin-like, putative                           | 0,1664 | 0,1148  |
| TcCLB.508579.40  | hypothetical protein, conserved                        | 0,1662 | 0,266   |
| TcCLB.504505.20  | retrotransposon hot spot (RHS) protein, putative       | 0,1661 | 0,3391  |

|                  |                                                           |        |         |
|------------------|-----------------------------------------------------------|--------|---------|
| TcCLB.506507.30  | beta galactofuranosyl glycosyltransferase, putative       | 0,166  | 0,2683  |
| TcCLB.503815.29  | hypothetical protein, conserved                           | 0,1659 | 0,4593  |
| TcCLB.506829.5   | hypothetical protein, conserved                           | 0,1658 | 0,3348  |
| TcCLB.510217.10  | hypothetical protein                                      | 0,1658 | 0,8085  |
| TcCLB.508231.230 | protein transport protein Sec23A, putative                | 0,1657 | 0,2295  |
| TcCLB.511511.139 | zinc finger protein, putative                             | 0,1654 | 0,1236  |
| TcCLB.511229.100 | hypothetical protein, conserved                           | 0,1652 | 0,0922  |
| TcCLB.506147.180 | DNA polymerase epsilon catalytic subunit, putative        | 0,1652 | 0,1069  |
| TcCLB.510039.50  | hypothetical protein, conserved                           | 0,1652 | 0,175   |
| TcCLB.510101.150 | adaptin-related protein-like, putative                    | 0,1651 | 0,09019 |
| TcCLB.506627.50  | mitochondrial exoribonuclease DSS-1, putative             | 0,1651 | 0,1021  |
| TcCLB.504105.100 | hypothetical protein                                      | 0,1651 | 0,1465  |
| TcCLB.511621.70  | ribosomal protein L11, putative                           | 0,1651 | 0,1727  |
| TcCLB.511585.50  | hypothetical protein, conserved                           | 0,1651 | 0,2012  |
| TcCLB.507053.110 | hypothetical protein, conserved                           | 0,165  | 0,1057  |
| TcCLB.505997.190 | retrotransposon hot spot protein (RHS, pseudogene), puta  | 0,1649 | 0,206   |
| TcCLB.510219.10  | hypothetical protein, conserved                           | 0,1648 | 0,2597  |
| TcCLB.504157.120 | hypothetical protein, conserved                           | 0,1648 | 0,3818  |
| TcCLB.506925.390 | MP44, putative                                            | 0,1647 | 0,1893  |
| TcCLB.511171.60  | surface protease GP63 (pseudogene), putative              | 0,1647 | 0,7288  |
| TcCLB.504479.20  | retrotransposon hot spot protein (RHS, pseudogene), puta  | 0,1646 | 0,3318  |
| TcCLB.507297.20  | cysteinyl-tRNA synthetase, putative                       | 0,1645 | 0,04198 |
| TcCLB.509029.120 | ATP-dependent DNA helicase, putative                      | 0,1644 | 0,1786  |
| TcCLB.511537.60  | hypothetical protein, conserved                           | 0,1643 | 0,1232  |
| TcCLB.511847.70  | hypothetical protein, conserved                           | 0,1643 | 0,1938  |
| TcCLB.504241.90  | dispersed gene family protein 1 (DGF-1), putative         | 0,1643 | 0,7247  |
| TcCLB.503541.20  | hypothetical protein, conserved                           | 0,1642 | 0,2522  |
| TcCLB.506187.20  | trans-sialidase, Group V, putative                        | 0,1642 | 0,3117  |
| TcCLB.507801.50  | tubulin-tyrosine ligase, putative                         | 0,1641 | 0,1494  |
| TcCLB.511807.210 | hypothetical protein, conserved (pseudogene)              | 0,164  | 0,06733 |
| TcCLB.504213.130 | hypothetical protein, conserved                           | 0,1639 | 0,2879  |
| TcCLB.510951.19  | hypothetical protein, conserved                           | 0,1637 | 0,3163  |
| TcCLB.510427.5   | hypothetical protein, conserved                           | 0,1637 | 0,4082  |
| TcCLB.507083.100 | hypothetical protein, conserved                           | 0,1636 | 0,04999 |
| TcCLB.507991.60  | mismatch repair protein MLH1, putative                    | 0,1636 | 0,2196  |
| TcCLB.510943.120 | hypothetical protein, conserved                           | 0,1634 | 0,09739 |
| TcCLB.511017.20  | 2,3-bisphosphoglycerate-independent phosphoglycerate n    | 0,1634 | 0,1218  |
| TcCLB.510687.10  | dynein heavy chain (pseudogene), putative                 | 0,1633 | 0,0273  |
| TcCLB.510769.30  | hypothetical protein, conserved                           | 0,1633 | 0,1155  |
| TcCLB.506203.100 | hypothetical protein                                      | 0,1632 | 0,1345  |
| TcCLB.508629.26  | retrotransposon hot spot protein (RHS, pseudogene), puta  | 0,1632 | 0,3021  |
| TcCLB.506195.70  | PrimPol-like protein 2, putative (ppl2)                   | 0,1629 | 0,136   |
| TcCLB.511291.30  | lipoic acid synthetase, mitochondrial precursor, putative | 0,1629 | 0,1827  |
| TcCLB.503757.49  | hypothetical protein, conserved (fragment)                | 0,1629 | 0,6316  |
| TcCLB.506743.90  | hypothetical protein, conserved                           | 0,1628 | 0,4615  |

|                  |                                                          |        |         |
|------------------|----------------------------------------------------------|--------|---------|
| TcCLB.503599.40  | hypothetical protein, conserved                          | 0,1627 | 0,1478  |
| TcCLB.507049.20  | hypothetical protein                                     | 0,1627 | 0,2856  |
| TcCLB.510043.59  | hypothetical protein, conserved (fragment)               | 0,1626 | 0,1571  |
| TcCLB.506181.40  | hypothetical protein, conserved                          | 0,1622 | 0,1397  |
| TcCLB.508873.170 | retrotransposon hot spot protein (RHS, pseudogene), puta | 0,1622 | 0,6238  |
| TcCLB.507841.40  | hypothetical protein, conserved                          | 0,1621 | 0,1934  |
| TcCLB.510885.40  | WD repeat and HMG-box DNA-binding protein, putative      | 0,162  | 0,05705 |
| TcCLB.509073.50  | hypothetical protein, conserved                          | 0,162  | 0,1963  |
| TcCLB.509959.160 | hypothetical protein, conserved (pseudogene)             | 0,162  | 0,2898  |
| TcCLB.506249.60  | 40S ribosomal protein S8, putative                       | 0,1619 | 0,1095  |
| TcCLB.509179.40  | hypothetical protein, conserved                          | 0,1619 | 0,263   |
| TcCLB.511355.40  | GUP1, putative                                           | 0,1618 | 0,1935  |
| TcCLB.510663.80  | hypothetical protein, conserved                          | 0,1618 | 0,2249  |
| TcCLB.507611.40  | protein kinase, putative                                 | 0,1618 | 0,6996  |
| TcCLB.509609.19  | DNA repair and recombination helicase protein PIF7, puta | 0,1617 | 0,3457  |
| TcCLB.504427.190 | hypothetical protein, conserved                          | 0,1616 | 0,2376  |
| TcCLB.510759.110 | hypothetical protein, conserved                          | 0,1615 | 0,1258  |
| TcCLB.509033.100 | hypothetical protein, conserved                          | 0,1615 | 0,1891  |
| TcCLB.506485.60  | hypothetical protein, conserved                          | 0,1614 | 0,1943  |
| TcCLB.509243.30  | hypothetical protein, conserved                          | 0,1612 | 0,342   |
| TcCLB.509617.20  | paraflagellar rod protein 3, putative (PAR3)             | 0,161  | 0,192   |
| TcCLB.507547.80  | protein kinase, putative                                 | 0,161  | 0,3568  |
| TcCLB.503733.40  | hypothetical protein, conserved                          | 0,161  | 0,364   |
| TcCLB.507641.140 | ATP-dependent DEAD/H RNA helicase, putative              | 0,1609 | 0,04585 |
| TcCLB.503637.20  | hypothetical protein, conserved                          | 0,1608 | 0,1259  |
| TcCLB.504103.100 | ABC1 protein, putative                                   | 0,1607 | 0,1916  |
| TcCLB.508641.120 | hypothetical protein, conserved                          | 0,1607 | 0,2202  |
| TcCLB.506983.60  | DNA excision repair protein, putative                    | 0,1606 | 0,05606 |
| TcCLB.509857.40  | hypothetical protein, conserved                          | 0,1606 | 0,09032 |
| TcCLB.510533.160 | hypothetical protein, conserved                          | 0,1605 | 0,2078  |
| TcCLB.507515.50  | hypothetical protein                                     | 0,1604 | 0,1995  |
| TcCLB.503847.30  | hypothetical protein, conserved                          | 0,1604 | 0,2128  |
| TcCLB.508143.65  | elongation factor 1-gamma (EF-1-gamma, pseudogene),      | 0,1604 | 0,6715  |
| TcCLB.506989.250 | hypothetical protein, conserved                          | 0,16   | 0,1221  |
| TcCLB.503719.10  | hypothetical protein                                     | 0,1599 | 0,1207  |
| TcCLB.508479.390 | RNA triphosphatase, putative                             | 0,1599 | 0,2651  |
| TcCLB.509123.20  | hypothetical protein                                     | 0,1599 | 0,7525  |
| TcCLB.505183.50  | hypothetical protein, conserved                          | 0,1598 | 0,1155  |
| TcCLB.506301.50  | succinyl-coA:3-ketoacid-coenzyme A transferase, mitocho  | 0,1598 | 0,1897  |
| TcCLB.503897.10  | hypothetical protein                                     | 0,1597 | 0,1068  |
| TcCLB.507533.10  | phosphatidylinositol 4-kinase alpha, putative            | 0,1597 | 0,1366  |
| TcCLB.503909.50  | hypothetical protein, conserved (YCF45)                  | 0,1596 | 0,1516  |
| TcCLB.507711.130 | hypothetical protein, conserved                          | 0,1593 | 0,3023  |
| TcCLB.510741.70  | protein kinase, putative                                 | 0,1593 | 0,3808  |
| TcCLB.511065.10  | STOP axonemal protein, putative                          | 0,1591 | 0,1695  |



|                   |                                                              |        |         |
|-------------------|--------------------------------------------------------------|--------|---------|
| TcCLB.506527.4    | hypothetical protein, conserved (fragment)                   | 0,1589 | 0,1192  |
| TcCLB.508209.39   | hypothetical protein, conserved                              | 0,1589 | 0,1681  |
| TcCLB.506941.210  | hypothetical protein, conserved                              | 0,1589 | 0,2044  |
| TcCLB.508153.1100 | mitochondrial protein 99, putative (MP99)                    | 0,1588 | 0,1569  |
| TcCLB.504111.30   | hypothetical protein, conserved                              | 0,1588 | 0,2125  |
| TcCLB.510355.250  | hypothetical protein, conserved                              | 0,1587 | 0,1203  |
| TcCLB.510423.70   | hypothetical protein, conserved                              | 0,1587 | 0,4149  |
| TcCLB.511515.20   | AAA ATPase (pseudogene), putative                            | 0,1586 | 0,1254  |
| TcCLB.511693.120  | hypothetical protein                                         | 0,1586 | 0,1417  |
| TcCLB.507681.60   | hypothetical protein, conserved                              | 0,1586 | 0,3621  |
| TcCLB.506743.4    | eukaryotic translation initiation factor 1A, putative (fragm | 0,1585 | 0,2312  |
| TcCLB.508881.40   | hypothetical protein, conserved                              | 0,1584 | 0,1519  |
| TcCLB.506855.110  | hypothetical protein, conserved                              | 0,1584 | 0,1582  |
| TcCLB.511867.40   | hypothetical protein, conserved                              | 0,1583 | 0,2852  |
| TcCLB.507001.60   | hypothetical protein, conserved                              | 0,1582 | 0,08577 |
| TcCLB.508973.110  | hypothetical protein, conserved                              | 0,1581 | 0,1912  |
| TcCLB.511899.20   | hypothetical protein, conserved                              | 0,158  | 0,2015  |
| TcCLB.504147.210  | hypothetical protein, conserved                              | 0,1578 | 0,3092  |
| TcCLB.508979.80   | hypothetical protein, conserved                              | 0,1577 | 0,275   |
| TcCLB.510283.80   | hypothetical protein, conserved                              | 0,1576 | 0,2774  |
| TcCLB.504017.40   | aminomethyltransferase, mitochondrial, putative (GCV)        | 0,1576 | 0,296   |
| TcCLB.508209.70   | hypothetical protein, conserved                              | 0,1575 | 0,2665  |
| TcCLB.506405.110  | ribosomal protein L13, putative                              | 0,1575 | 0,3756  |
| TcCLB.508799.130  | hypothetical protein, conserved                              | 0,1574 | 0,08804 |
| TcCLB.506537.10   | retrotransposon hot spot protein (RHS, pseudogene), puta     | 0,1574 | 0,1758  |
| TcCLB.511183.116  | trans-sialidase (pseudogene), putative                       | 0,1573 | 0,6178  |
| TcCLB.511907.210  | hypothetical protein, conserved                              | 0,157  | 0,2365  |
| TcCLB.511585.269  | retrotransposon hot spot protein (RHS, pseudogene), puta     | 0,157  | 0,3604  |
| TcCLB.509233.80   | heat shock protein DNAJ, putative                            | 0,1569 | 0,1579  |
| TcCLB.511621.160  | hypothetical protein, conserved                              | 0,1569 | 0,1903  |
| TcCLB.511301.140  | potassium voltage-gated channel                              | 0,1569 | 0,2291  |
| TcCLB.509591.30   | ras-family member, GTP-binding protein, putative             | 0,1568 | 0,1378  |
| TcCLB.509965.200  | hypothetical protein, conserved                              | 0,1568 | 0,281   |
| TcCLB.511217.39   | hypothetical protein, conserved                              | 0,1568 | 0,3427  |
| TcCLB.511417.20   | retrotransposon hot spot protein (RHS, pseudogene), puta     | 0,1568 | 0,548   |
| TcCLB.506147.184  | hypothetical protein, conserved                              | 0,1567 | 0,3301  |
| TcCLB.508687.25   | hypothetical protein                                         | 0,1567 | 0,5084  |
| TcCLB.506239.20   | hypothetical protein, conserved                              | 0,1566 | 0,2226  |
| TcCLB.428403.5    | hypothetical protein, conserved                              | 0,1565 | 0,2759  |
| TcCLB.490165.19   | hypothetical protein, conserved                              | 0,1564 | 0,4766  |
| TcCLB.510399.10   | dispersed gene family protein 1 (DGF-1), putative            | 0,1564 | 0,7486  |
| TcCLB.503847.60   | hypothetical protein, conserved                              | 0,1563 | 0,112   |
| TcCLB.511545.110  | hypothetical protein                                         | 0,1563 | 0,3624  |
| TcCLB.503829.89   | spliceosomal U5 snRNP-specific protein, putative             | 0,1561 | 0,3803  |
| TcCLB.504247.10   | hypothetical protein, conserved                              | 0,156  | 0,2606  |

|                  |                                                          |        |         |
|------------------|----------------------------------------------------------|--------|---------|
| TcCLB.506825.20  | hypothetical protein, conserved                          | 0,1559 | 0,06296 |
| TcCLB.509991.110 | transcription elongation factor 1 homolog (ELOF1)        | 0,1558 | 0,2604  |
| TcCLB.508443.50  | hypothetical protein, conserved                          | 0,1558 | 0,2653  |
| TcCLB.503521.39  | mitochondrial carrier protein, putative                  | 0,1558 | 0,2825  |
| TcCLB.507787.150 | hypothetical protein, conserved                          | 0,1557 | 0,1589  |
| TcCLB.507005.50  | hypothetical protein                                     | 0,1556 | 0,1448  |
| TcCLB.511429.20  | cyclophilin 15, putative                                 | 0,1556 | 0,2194  |
| TcCLB.510741.60  | hypothetical protein, conserved                          | 0,1556 | 0,23    |
| TcCLB.503841.20  | AMPK subunit gamma (AMPKG)                               | 0,1555 | 0,1973  |
| TcCLB.509259.45  | hypothetical protein                                     | 0,1554 | 0,475   |
| TcCLB.504163.10  | hypothetical protein, conserved                          | 0,1553 | 0,09069 |
| TcCLB.510687.149 | coatomer alpha subunit, putative                         | 0,1553 | 0,1512  |
| TcCLB.508899.54  | hypothetical protein, conserved                          | 0,1552 | 0,2779  |
| TcCLB.510099.30  | hypothetical protein, conserved                          | 0,1551 | 0,1912  |
| TcCLB.510761.70  | ubiquitin hydrolase, putative                            | 0,1549 | 0,136   |
| TcCLB.508207.60  | hypothetical protein, conserved                          | 0,1549 | 0,2538  |
| TcCLB.504069.60  | GPI transamidase component GAA1, putative                | 0,1549 | 0,2711  |
| TcCLB.508357.9   | hypothetical protein, conserved (fragment)               | 0,1546 | 0,1235  |
| TcCLB.504741.210 | hypothetical protein, conserved                          | 0,1546 | 0,1834  |
| TcCLB.511671.50  | hypothetical protein, conserved                          | 0,1541 | 0,04711 |
| TcCLB.511001.180 | hypothetical protein, conserved                          | 0,1541 | 0,1303  |
| TcCLB.508045.14  | hypothetical protein, conserved                          | 0,1541 | 0,1787  |
| TcCLB.508849.20  | retrotransposon hot spot protein (RHS, pseudogene), puta | 0,1541 | 0,1853  |
| TcCLB.508153.120 | ubiquitin hydrolase, putative                            | 0,154  | 0,152   |
| TcCLB.507063.40  | hypothetical protein, conserved                          | 0,1539 | 0,2596  |
| TcCLB.509011.40  | calreticulin, putative                                   | 0,1538 | 0,02273 |
| TcCLB.508355.50  | hypothetical protein, conserved                          | 0,1537 | 0,3241  |
| TcCLB.511185.150 | hypothetical protein, conserved (pseudogene)             | 0,1536 | 0,316   |
| TcCLB.507049.5   | kynurenine aminotransferase (pseudogene), putative       | 0,1533 | 0,2572  |
| TcCLB.507711.220 | hypothetical protein, conserved                          | 0,1532 | 0,4352  |
| TcCLB.508409.230 | UBX domain-containing protein                            | 0,153  | 0,1311  |
| TcCLB.503869.60  | coatomer beta subunit (pseudogene), putative             | 0,1529 | 0,1043  |
| TcCLB.507713.20  | hypothetical protein, conserved                          | 0,1529 | 0,2159  |
| TcCLB.506925.290 | hypothetical protein                                     | 0,1528 | 0,1386  |
| TcCLB.506835.140 | hypothetical protein, conserved                          | 0,1526 | 0,1064  |
| TcCLB.506925.50  | hypothetical protein, conserved                          | 0,1526 | 0,1493  |
| TcCLB.510381.5   | SNF2 DNA repair protein (pseudogene), putative           | 0,1526 | 0,316   |
| TcCLB.503821.10  | DNA-directed RNA polymerase I subunit, putative          | 0,1526 | 0,3823  |
| TcCLB.506287.120 | hypothetical protein                                     | 0,1523 | 0,2175  |
| TcCLB.510659.110 | hypothetical protein, conserved                          | 0,1522 | 0,2118  |
| TcCLB.506017.31  | ATP-dependent DEAD/H RNA helicase (pseudogene), puta     | 0,1522 | 0,5904  |
| TcCLB.511117.60  | mucin-associated surface protein (MASP, pseudogene), pi  | 0,1521 | 0,6313  |
| TcCLB.511003.40  | hypothetical protein, conserved                          | 0,1519 | 0,135   |
| TcCLB.507073.49  | hypothetical protein, conserved                          | 0,1518 | 0,228   |
| TcCLB.506147.160 | hypothetical protein, conserved                          | 0,1518 | 0,2767  |

|                  |                                                             |        |         |
|------------------|-------------------------------------------------------------|--------|---------|
| TcCLB.503791.49  | vacuolar protein sorting-associated protein, putative (frag | 0,1516 | 0,298   |
| TcCLB.509733.50  | hypothetical protein, conserved                             | 0,1515 | 0,2214  |
| TcCLB.503975.20  | hypothetical protein                                        | 0,1515 | 0,3076  |
| TcCLB.508409.220 | hypothetical protein, conserved                             | 0,1514 | 0,2166  |
| TcCLB.507491.50  | hypothetical protein, conserved                             | 0,1511 | 0,2342  |
| TcCLB.506529.620 | hypothetical protein                                        | 0,1511 | 0,2898  |
| TcCLB.507079.10  | hypothetical protein, conserved                             | 0,1508 | 0,2294  |
| TcCLB.504257.30  | S-adenosylmethionine decarboxylase proenzyme, putative      | 0,1506 | 0,151   |
| TcCLB.508461.90  | hypothetical protein, conserved                             | 0,1505 | 0,1889  |
| TcCLB.506529.190 | hypothetical protein, conserved                             | 0,1504 | 0,2157  |
| TcCLB.508965.94  | hypothetical protein, conserved                             | 0,1504 | 0,2258  |
| TcCLB.506435.450 | hypothetical protein, conserved                             | 0,1503 | 0,1553  |
| TcCLB.509455.130 | cAMP response protein, putative (CARP4)                     | 0,1501 | 0,1557  |
| TcCLB.504171.20  | hypothetical protein, conserved                             | 0,1501 | 0,3288  |
| TcCLB.511529.140 | hypothetical protein, conserved                             | 0,1499 | 0,1018  |
| TcCLB.503897.110 | plectin-like protein, putative                              | 0,1499 | 0,2568  |
| TcCLB.506095.9   | dispersed gene family protein 1 (DGF-1), putative (fragme   | 0,1499 | 0,356   |
| TcCLB.510635.40  | hypothetical protein, conserved                             | 0,1498 | 0,2569  |
| TcCLB.509779.50  | hypothetical protein, conserved                             | 0,1498 | 0,2583  |
| TcCLB.508325.130 | protein kinase, putative                                    | 0,1497 | 0,226   |
| TcCLB.506475.50  | Replication Factor C Subunit 1-related protein              | 0,1497 | 0,228   |
| TcCLB.507591.20  | beta galactofuranosyl glycosyltransferase (pseudogene), f   | 0,1497 | 0,4854  |
| TcCLB.508175.90  | hypothetical protein                                        | 0,1496 | 0,07941 |
| TcCLB.420369.40  | hypothetical protein, conserved                             | 0,1496 | 0,3094  |
| TcCLB.510165.40  | hypothetical protein, conserved                             | 0,1495 | 0,1577  |
| TcCLB.507093.310 | hypothetical protein, conserved                             | 0,1495 | 0,2224  |
| TcCLB.505931.30  | trans-sialidase, Group I, putative                          | 0,1495 | 0,4006  |
| TcCLB.460125.10  | hypothetical protein, conserved (fragment)                  | 0,1494 | 0,4676  |
| TcCLB.511481.40  | N-Acetyl-D-glucosaminylphosphatidylinositol de-N-acetyl     | 0,1492 | 0,3368  |
| TcCLB.511309.20  | hydrolase-like protein, putative                            | 0,1492 | 0,3475  |
| TcCLB.510039.100 | hypothetical protein, conserved                             | 0,1491 | 0,3633  |
| TcCLB.509085.60  | dispersed gene family protein 1 (DGF-1), putative           | 0,1491 | 0,4843  |
| TcCLB.507541.30  | casein kinase, putative                                     | 0,149  | 0,08093 |
| TcCLB.503781.20  | phosphatidylinositol N-acetylglucosaminyltransferase sub    | 0,1489 | 0,2797  |
| TcCLB.510241.100 | hypothetical protein, conserved                             | 0,1489 | 0,2937  |
| TcCLB.508109.20  | mucin TcMUCII, putative                                     | 0,1489 | 0,6181  |
| TcCLB.503629.10  | hypothetical protein, conserved                             | 0,1484 | 0,1879  |
| TcCLB.508479.150 | serine/threonine protein kinase, putative                   | 0,1483 | 0,102   |
| TcCLB.507041.20  | hypothetical protein, conserved                             | 0,1483 | 0,1947  |
| TcCLB.507521.40  | hypothetical protein, conserved                             | 0,1483 | 0,2934  |
| TcCLB.511269.20  | Multisite-specific tRNA:(cytosine-C(5))-methyltransferase   | 0,1482 | 0,1289  |
| TcCLB.509791.180 | hypothetical protein, conserved                             | 0,1481 | 0,303   |
| TcCLB.504425.50  | hypothetical protein, conserved                             | 0,1481 | 0,4846  |
| TcCLB.508799.250 | hypothetical protein, conserved                             | 0,148  | 0,1179  |
| TcCLB.504017.79  | glycyl-tRNA synthetase, putative                            | 0,1477 | 0,2112  |

|                  |                                                          |        |         |
|------------------|----------------------------------------------------------|--------|---------|
| TcCLB.509645.19  | hypothetical protein, conserved                          | 0,1477 | 0,2268  |
| TcCLB.506661.100 | hypothetical protein, conserved                          | 0,1477 | 0,5159  |
| TcCLB.503999.90  | RNA-binding protein 34, putative (RBP34)                 | 0,1475 | 0,2946  |
| TcCLB.511893.20  | hypothetical protein, conserved                          | 0,1475 | 0,7664  |
| TcCLB.509911.90  | peptidase, putative                                      | 0,1474 | 0,0587  |
| TcCLB.506531.20  | hypothetical protein, conserved                          | 0,1474 | 0,1544  |
| TcCLB.506581.4   | hypothetical protein, conserved                          | 0,1473 | 0,5891  |
| TcCLB.508891.120 | periodic tryptophan protein 2 (pseudogene), putative     | 0,1472 | 0,163   |
| TcCLB.506833.9   | hypothetical protein, conserved                          | 0,1471 | 0,2219  |
| TcCLB.506821.30  | glycosylphosphatidylinositol-specific phospholipase C    | 0,1471 | 0,2289  |
| TcCLB.508479.260 | hypothetical protein, conserved                          | 0,147  | 0,2075  |
| TcCLB.503479.10  | hypothetical protein, conserved                          | 0,147  | 0,2683  |
| TcCLB.472777.20  | hypothetical protein, conserved                          | 0,1469 | 0,1922  |
| TcCLB.506627.80  | hypothetical protein, conserved                          | 0,1469 | 0,1938  |
| TcCLB.503953.20  | hypothetical protein, conserved                          | 0,1469 | 0,4196  |
| TcCLB.510323.70  | hypothetical protein, conserved                          | 0,1468 | 0,1544  |
| TcCLB.506529.14  | hypothetical protein, conserved                          | 0,1468 | 0,3391  |
| TcCLB.504229.70  | retrotransposon hot spot (RHS) protein, putative         | 0,1467 | 0,2712  |
| TcCLB.506243.94  | retrotransposon hot spot protein (RHS, pseudogene), puta | 0,1467 | 0,3087  |
| TcCLB.506665.20  | hypothetical protein                                     | 0,1466 | 0,5619  |
| TcCLB.508489.40  | hypothetical protein, conserved                          | 0,1465 | 0,2602  |
| TcCLB.511315.56  | hypothetical protein, conserved                          | 0,1465 | 0,6195  |
| TcCLB.506969.10  | mucin-associated surface protein (MASP, pseudogene), p   | 0,1464 | 0,4192  |
| TcCLB.510175.170 | glycine dehydrogenase [decarboxylating] (pseudogene), p  | 0,1463 | 0,4014  |
| TcCLB.506557.20  | hypothetical protein, conserved                          | 0,1462 | 0,1728  |
| TcCLB.511003.140 | vacuolar transport protein 4A, putative                  | 0,1462 | 0,2437  |
| TcCLB.508153.820 | inorganic pyrophosphatase, putative                      | 0,1462 | 0,3041  |
| TcCLB.509235.10  | UDP-Gal or UDP-GlcNAc-dependent glycosyltransferase, p   | 0,1462 | 0,5053  |
| TcCLB.511779.31  | hypothetical protein                                     | 0,1462 | 0,7205  |
| TcCLB.506459.190 | hypothetical protein                                     | 0,1461 | 0,6146  |
| TcCLB.504033.170 | tyrosine phosphatase, putative                           | 0,146  | 0,2802  |
| TcCLB.510627.70  | hypothetical protein, conserved (pseudogene)             | 0,146  | 0,7426  |
| TcCLB.507689.25  | hypothetical protein, conserved                          | 0,1458 | 0,6512  |
| TcCLB.511537.21  | hypothetical protein, conserved                          | 0,1457 | 0,3728  |
| TcCLB.506479.80  | hypothetical protein, conserved                          | 0,1456 | 0,242   |
| TcCLB.510333.10  | hypothetical protein, conserved                          | 0,1455 | 0,1331  |
| TcCLB.510237.95  | hypothetical protein, conserved (pseudogene)             | 0,1455 | 0,6908  |
| TcCLB.503537.18  | retrotransposon hot spot protein (RHS, pseudogene), puta | 0,1454 | 0,5712  |
| TcCLB.506155.70  | SWI/SNF-related helicase, putative                       | 0,1452 | 0,07986 |
| TcCLB.509167.40  | amino acid permease, putative                            | 0,1452 | 0,2371  |
| TcCLB.511633.30  | hypothetical protein, conserved                          | 0,1452 | 0,2762  |
| TcCLB.510901.100 | DNA topoisomerase III, putative                          | 0,1451 | 0,1199  |
| TcCLB.508699.100 | surface protease GP63, putative                          | 0,1451 | 0,3903  |
| TcCLB.508541.120 | trans-sialidase (pseudogene), putative                   | 0,1449 | 0,7427  |
| TcCLB.509797.20  | hypothetical protein, conserved                          | 0,1447 | 0,2504  |

|                  |                                                          |        |         |
|------------------|----------------------------------------------------------|--------|---------|
| TcCLB.507911.30  | dispersed gene family protein 1 (DGF-1), putative        | 0,1446 | 0,4498  |
| TcCLB.508741.415 | hypothetical protein, conserved (pseudogene)             | 0,1445 | 0,3971  |
| TcCLB.459619.10  | hypothetical protein, conserved (pseudogene)             | 0,1445 | 0,6244  |
| TcCLB.506871.20  | hypothetical protein, conserved                          | 0,1444 | 0,1319  |
| TcCLB.510101.250 | hypothetical protein, conserved                          | 0,1444 | 0,2134  |
| TcCLB.509721.50  | hypothetical protein                                     | 0,1442 | 0,3179  |
| TcCLB.509683.130 | aminopeptidase, putative                                 | 0,1441 | 0,2547  |
| TcCLB.509179.200 | hypothetical protein, conserved                          | 0,1441 | 0,5135  |
| TcCLB.506737.30  | hypothetical protein, conserved                          | 0,1439 | 0,2331  |
| TcCLB.507681.80  | hypothetical protein                                     | 0,1438 | 0,1537  |
| TcCLB.503929.20  | ribosomal protein L13, putative                          | 0,1438 | 0,4121  |
| TcCLB.511663.50  | dispersed gene family protein 1 (DGF-1), putative        | 0,1438 | 0,7305  |
| TcCLB.510759.4   | hypothetical protein, conserved                          | 0,1437 | 0,296   |
| TcCLB.503465.40  | hypothetical protein                                     | 0,1437 | 0,3083  |
| TcCLB.506053.60  | hypothetical protein (fragment)                          | 0,1435 | 0,3125  |
| TcCLB.504035.130 | hypothetical protein, conserved                          | 0,1432 | 0,2743  |
| TcCLB.508569.10  | hypothetical protein, conserved                          | 0,1432 | 0,6819  |
| TcCLB.457251.19  | hypothetical protein, conserved (fragment)               | 0,143  | 0,4347  |
| TcCLB.509205.110 | elongation factor G2-like protein, putative              | 0,143  | 0,6709  |
| TcCLB.508285.5   | trans-sialidase (pseudogene), putative                   | 0,1428 | 0,5612  |
| TcCLB.506757.10  | phospholipid:diacylglycerol acyltransferase, putative    | 0,1427 | 0,1019  |
| TcCLB.508469.10  | hypothetical protein, conserved                          | 0,1427 | 0,4832  |
| TcCLB.504867.30  | hypothetical protein, conserved                          | 0,1427 | 0,5365  |
| TcCLB.511229.110 | glycyl-tRNA synthetase, putative                         | 0,1426 | 0,1041  |
| TcCLB.509943.11  | cAMP specific phosphodiesterase, putative                | 0,1426 | 0,6433  |
| TcCLB.503733.10  | hypothetical protein, conserved                          | 0,1425 | 0,3471  |
| TcCLB.503399.10  | hypothetical protein, conserved                          | 0,1424 | 0,3308  |
| TcCLB.511575.50  | hypothetical protein, conserved                          | 0,1422 | 0,07862 |
| TcCLB.510769.150 | hypothetical protein, conserved                          | 0,1422 | 0,1673  |
| TcCLB.506885.60  | hypothetical protein, conserved                          | 0,1422 | 0,1764  |
| TcCLB.509225.30  | trans-sialidase (pseudogene), putative                   | 0,1421 | 0,2692  |
| TcCLB.511627.60  | vesicle-associated membrane protein                      | 0,1419 | 0,2232  |
| TcCLB.510791.30  | mucin-associated surface protein (MASP, pseudogene), pu  | 0,1418 | 0,2159  |
| TcCLB.510439.61  | heat shock 70 kDa protein, putative (fragment)           | 0,1415 | 0,1562  |
| TcCLB.508387.90  | paraflagellar rod protein, putative                      | 0,1414 | 0,1493  |
| TcCLB.511805.29  | 2,3-bisphosphoglycerate-independent phosphoglycerate r   | 0,1414 | 0,517   |
| TcCLB.506457.130 | hypothetical protein, conserved                          | 0,1412 | 0,1948  |
| TcCLB.506561.20  | retrotransposon hot spot protein (RHS, pseudogene), puta | 0,1412 | 0,3532  |
| TcCLB.506529.460 | hypothetical protein, conserved                          | 0,1411 | 0,1867  |
| TcCLB.507225.10  | retrotransposon hot spot (RHS) protein, putative         | 0,1408 | 0,2124  |
| TcCLB.508355.300 | hypothetical protein, conserved                          | 0,1408 | 0,2841  |
| TcCLB.510311.30  | hypothetical protein, conserved                          | 0,1407 | 0,1895  |
| TcCLB.510595.20  | hypothetical protein, conserved                          | 0,1407 | 0,3241  |
| TcCLB.508297.30  | hypothetical protein, conserved                          | 0,1406 | 0,2525  |
| TcCLB.506821.10  | hypothetical protein                                     | 0,1405 | 0,2713  |

|                  |                                                              |        |         |
|------------------|--------------------------------------------------------------|--------|---------|
| TcCLB.506835.20  | hypothetical protein                                         | 0,1403 | 0,1564  |
| TcCLB.509069.40  | hypothetical protein                                         | 0,1402 | 0,2128  |
| TcCLB.506537.230 | hypothetical protein, conserved                              | 0,1402 | 0,5457  |
| TcCLB.510661.270 | replication factor C, subunit 3, putative                    | 0,14   | 0,2929  |
| TcCLB.511469.10  | hypothetical protein, conserved                              | 0,14   | 0,4513  |
| TcCLB.509611.110 | RNA-editing complex protein, putative                        | 0,1399 | 0,2656  |
| TcCLB.509493.120 | hypothetical protein                                         | 0,1397 | 0,4893  |
| TcCLB.476725.9   | dispersed gene family protein 1 (DGF-1), putative (fragment) | 0,1397 | 0,5825  |
| TcCLB.508799.104 | hypothetical protein, conserved                              | 0,1396 | 0,3852  |
| TcCLB.504033.220 | palmitoyl acyltransferase 1, putative                        | 0,1395 | 0,146   |
| TcCLB.506885.110 | hypothetical protein, conserved                              | 0,1393 | 0,09593 |
| TcCLB.511813.30  | proteasome regulatory ATPase subunit 5, putative             | 0,1393 | 0,2572  |
| TcCLB.509289.5   | tuzin (fragment)                                             | 0,1392 | 0,04354 |
| TcCLB.510431.170 | hypothetical protein, conserved                              | 0,1392 | 0,1991  |
| TcCLB.510163.20  | elongation factor 1-gamma (EF-1-gamma), putative             | 0,1392 | 0,249   |
| TcCLB.507049.100 | mitochondrial RNA binding protein, putative                  | 0,139  | 0,2484  |
| TcCLB.508267.10  | hypothetical protein, conserved                              | 0,1389 | 0,1348  |
| TcCLB.506927.30  | hypothetical protein, conserved (fragment)                   | 0,1389 | 0,3889  |
| TcCLB.504425.110 | permease-like protein, putative                              | 0,1387 | 0,3931  |
| TcCLB.504071.100 | hypothetical protein, conserved                              | 0,1386 | 0,1416  |
| TcCLB.510029.10  | hypothetical protein, conserved (pseudogene)                 | 0,1386 | 0,4145  |
| TcCLB.503527.60  | hypothetical protein, conserved                              | 0,1384 | 0,3004  |
| TcCLB.507991.10  | hypothetical protein, conserved                              | 0,1384 | 0,3829  |
| TcCLB.511837.70  | mitogen activated protein kinase, putative                   | 0,1383 | 0,1293  |
| TcCLB.510797.4   | phosphatidylinositol (3,5) kinase, putative (fragment)       | 0,1383 | 0,3957  |
| TcCLB.506801.30  | hypothetical protein                                         | 0,1383 | 0,4031  |
| TcCLB.508153.340 | ATP-dependent 6-phosphofructokinase, glycosomal (PFK)        | 0,1382 | 0,2849  |
| TcCLB.508899.10  | proteasome regulatory non-ATP-ase subunit 9, putative (f     | 0,1382 | 0,3     |
| TcCLB.510283.160 | hypothetical protein, conserved                              | 0,138  | 0,3292  |
| TcCLB.510299.60  | hypothetical protein, conserved                              | 0,1379 | 0,4068  |
| TcCLB.444777.29  | intraflagellar transport protein 88, putative (fragment) (IF | 0,1378 | 0,2692  |
| TcCLB.509935.20  | hypothetical protein, conserved                              | 0,1377 | 0,1844  |
| TcCLB.507603.54  | hypothetical protein, conserved                              | 0,1374 | 0,4371  |
| TcCLB.506819.20  | hypothetical protein                                         | 0,1371 | 0,4737  |
| TcCLB.503627.20  | protein kinase, putative                                     | 0,1368 | 0,1246  |
| TcCLB.506999.30  | hypothetical protein, conserved                              | 0,1368 | 0,1462  |
| TcCLB.511283.220 | hypothetical protein, conserved                              | 0,1368 | 0,1645  |
| TcCLB.507019.60  | hypothetical protein, conserved                              | 0,1367 | 0,1741  |
| TcCLB.507663.80  | hypothetical protein, conserved                              | 0,1367 | 0,2249  |
| TcCLB.506525.162 | hypothetical protein, conserved                              | 0,1367 | 0,4513  |
| TcCLB.510345.30  | hypothetical protein                                         | 0,1367 | 0,4734  |
| TcCLB.508317.70  | hypothetical protein                                         | 0,1366 | 0,1271  |
| TcCLB.507691.61  | trans-sialidase (pseudogene), putative                       | 0,1366 | 0,4353  |
| TcCLB.509127.70  | hypothetical protein, conserved                              | 0,1365 | 0,2259  |
| TcCLB.506211.30  | intraflagellar transport protein 80, putative (IFT80)        | 0,1365 | 0,2613  |

|                  |                                                          |        |         |
|------------------|----------------------------------------------------------|--------|---------|
| TcCLB.508879.50  | hypothetical protein                                     | 0,1365 | 0,2664  |
| TcCLB.508961.30  | trafficking protein particle complex subunit 3, putative | 0,1365 | 0,4833  |
| TcCLB.506797.120 | hypothetical protein, conserved                          | 0,1364 | 0,1862  |
| TcCLB.506241.50  | hypothetical protein, conserved                          | 0,1364 | 0,2459  |
| TcCLB.511351.41  | choline/carnitine O-acyltransferase, putative            | 0,1364 | 0,5292  |
| TcCLB.504105.120 | hypothetical protein, conserved                          | 0,136  | 0,08653 |
| TcCLB.504741.50  | hypothetical protein, conserved                          | 0,1359 | 0,3038  |
| TcCLB.511739.20  | hypothetical protein, conserved                          | 0,1358 | 0,2162  |
| TcCLB.505333.20  | ATP-dependent DEAD/H RNA helicase (pseudogene), puta     | 0,1358 | 0,7065  |
| TcCLB.511727.50  | hypothetical protein, conserved                          | 0,1357 | 0,1107  |
| TcCLB.511507.70  | calpain-like cysteine peptidase, putative                | 0,1357 | 0,3519  |
| TcCLB.508479.213 | hypothetical protein, conserved                          | 0,1354 | 0,4836  |
| TcCLB.509875.140 | retrotransposon hot spot protein (RHS, pseudogene), puta | 0,1354 | 0,6653  |
| TcCLB.508913.25  | trans-sialidase, Group I, putative                       | 0,1354 | 0,7259  |
| TcCLB.508681.20  | hypothetical protein                                     | 0,1354 | 0,7576  |
| TcCLB.509207.20  | histone H2A, putative                                    | 0,1354 | 0,7697  |
| TcCLB.505231.10  | dynein heavy chain, putative                             | 0,1353 | 0,208   |
| TcCLB.510791.60  | mucin-associated surface protein (MASP, pseudogene), pi  | 0,1352 | 0,4598  |
| TcCLB.511717.20  | hypothetical protein, conserved                          | 0,1351 | 0,1922  |
| TcCLB.509461.30  | hypothetical protein, conserved                          | 0,1351 | 0,2291  |
| TcCLB.508307.110 | hypothetical protein, conserved                          | 0,135  | 0,07506 |
| TcCLB.511633.60  | structural maintenance of chromosome (SMC), putative     | 0,135  | 0,09422 |
| TcCLB.506887.69  | dual specificity protein phosphatase, putative           | 0,135  | 0,2889  |
| TcCLB.507927.50  | metallo-beta-lactamase superfamily, putative             | 0,135  | 0,3743  |
| TcCLB.507031.80  | hypothetical protein, conserved                          | 0,1349 | 0,09871 |
| TcCLB.508643.9   | pre-mRNA-splicing factor ATP-dependent RNA helicase, p   | 0,1349 | 0,247   |
| TcCLB.506457.40  | hypoxanthine-guanine phosphoribosyltransferase, putative | 0,1349 | 0,2497  |
| TcCLB.504045.120 | hypothetical protein, conserved                          | 0,1348 | 0,24    |
| TcCLB.509767.210 | vesicle transport v-SNARE 11, putative                   | 0,1348 | 0,304   |
| TcCLB.507937.14  | mucin TcMUCII (pseudogene), putative                     | 0,1346 | 0,7261  |
| TcCLB.503525.4   | hypothetical protein, conserved                          | 0,1345 | 0,1963  |
| TcCLB.507857.30  | hypothetical protein, conserved                          | 0,1345 | 0,1994  |
| TcCLB.506201.30  | serine/threonine-protein phosphatase PP1 beta            | 0,1345 | 0,2237  |
| TcCLB.510509.20  | hypothetical protein, conserved                          | 0,1345 | 0,2336  |
| TcCLB.507017.60  | hypothetical protein, conserved                          | 0,1344 | 0,2664  |
| TcCLB.506217.10  | hypothetical protein                                     | 0,1342 | 0,6013  |
| TcCLB.511487.51  | hypothetical protein                                     | 0,1342 | 0,6904  |
| TcCLB.504427.50  | AMPK subunit beta, putative (AMPKB)                      | 0,1341 | 0,2838  |
| TcCLB.505075.30  | hypothetical protein, conserved                          | 0,1341 | 0,3744  |
| TcCLB.507017.30  | hypothetical protein, conserved                          | 0,134  | 0,3919  |
| TcCLB.510889.110 | primase 2, putative                                      | 0,1339 | 0,2481  |
| TcCLB.504081.342 | hypothetical protein (pseudogene)                        | 0,1339 | 0,7517  |
| TcCLB.508207.210 | hypothetical protein, conserved                          | 0,1338 | 0,3584  |
| TcCLB.511571.49  | nucleoside phosphatase, putative                         | 0,1337 | 0,09215 |
| TcCLB.507519.170 | hypothetical protein, conserved                          | 0,1337 | 0,2568  |

|                  |                                                             |        |        |
|------------------|-------------------------------------------------------------|--------|--------|
| TcCLB.506531.40  | hypothetical protein, conserved                             | 0,1337 | 0,3196 |
| TcCLB.510597.20  | hypothetical protein, conserved                             | 0,1336 | 0,3569 |
| TcCLB.508989.70  | hypothetical protein, conserved                             | 0,1334 | 0,2262 |
| TcCLB.511817.60  | hypothetical protein, conserved                             | 0,1334 | 0,3504 |
| TcCLB.503595.19  | ATP-dependent DEAD/H RNA helicase, putative (fragment       | 0,1333 | 0,3226 |
| TcCLB.507257.140 | hypothetical protein, conserved                             | 0,1331 | 0,3458 |
| TcCLB.508881.10  | hypothetical protein, conserved                             | 0,1331 | 0,438  |
| TcCLB.503653.20  | hypothetical protein, conserved                             | 0,1331 | 0,5058 |
| TcCLB.503593.70  | eukaryotic peptide chain release factor subunit 1, putative | 0,1329 | 0,2527 |
| TcCLB.511737.80  | hypothetical protein                                        | 0,1329 | 0,3552 |
| TcCLB.507059.60  | orotidine-5-phosphate decarboxylase/orotate phosphoribc     | 0,1328 | 0,2543 |
| TcCLB.509695.120 | epsilon tubulin, putative                                   | 0,1328 | 0,2993 |
| TcCLB.422921.10  | hypothetical protein, conserved                             | 0,1328 | 0,4341 |
| TcCLB.504261.30  | trans-sialidase (pseudogene), putative                      | 0,1328 | 0,7109 |
| TcCLB.506529.535 | hypothetical protein, conserved                             | 0,1326 | 0,7863 |
| TcCLB.506871.80  | RNA polymerase-like protein, putative                       | 0,1325 | 0,4011 |
| TcCLB.509723.10  | protein kinase, putative                                    | 0,1324 | 0,5732 |
| TcCLB.511881.40  | protein transport protein Sec24C, putative                  | 0,1321 | 0,2464 |
| TcCLB.506485.70  | hypothetical protein, conserved                             | 0,1319 | 0,2557 |
| TcCLB.507511.30  | RNA guanylyltransferase, putative                           | 0,1319 | 0,2697 |
| TcCLB.503915.9   | hypothetical protein, conserved (fragment)                  | 0,1319 | 0,2753 |
| TcCLB.508641.230 | hypothetical protein, conserved                             | 0,1318 | 0,2061 |
| TcCLB.507505.20  | DnaJ chaperone protein (pseudogene), putative               | 0,1318 | 0,2895 |
| TcCLB.507805.20  | hypothetical protein                                        | 0,1318 | 0,35   |
| TcCLB.504147.180 | hypothetical protein, conserved                             | 0,1318 | 0,4267 |
| TcCLB.511577.130 | poly(A) export protein, putative                            | 0,1317 | 0,3367 |
| TcCLB.506297.10  | hypothetical protein                                        | 0,1316 | 0,1827 |
| TcCLB.509895.110 | hypothetical protein, conserved                             | 0,1316 | 0,6294 |
| TcCLB.506159.30  | dispersed gene family protein 1 (DGF-1), putative           | 0,1316 | 0,6299 |
| TcCLB.509237.140 | calpain-like cysteine peptidase, putative                   | 0,1315 | 0,3258 |
| TcCLB.509401.30  | cysteine peptidase, putative                                | 0,1314 | 0,0777 |
| TcCLB.508349.20  | tRNA nucleotidyltransferase, putative                       | 0,1314 | 0,2181 |
| TcCLB.508625.30  | ARP2/3 complex subunit, putative                            | 0,1314 | 0,5048 |
| TcCLB.511233.70  | hypothetical protein, conserved                             | 0,1312 | 0,1385 |
| TcCLB.510265.20  | 26S protease regulatory subunit, putative                   | 0,1312 | 0,1611 |
| TcCLB.508347.120 | hypothetical protein, conserved                             | 0,1312 | 0,2015 |
| TcCLB.510121.90  | hypothetical protein, conserved                             | 0,1312 | 0,2153 |
| TcCLB.503983.10  | hypothetical protein, conserved                             | 0,1311 | 0,4914 |
| TcCLB.506925.170 | hypothetical protein, conserved                             | 0,1311 | 0,7632 |
| TcCLB.511585.320 | retrotransposon hot spot (RHS) protein, putative            | 0,1309 | 0,2483 |
| TcCLB.503793.10  | 2-oxoglutarate dehydrogenase subunit, putative              | 0,1307 | 0,3836 |
| TcCLB.507093.160 | hypothetical protein, conserved                             | 0,1306 | 0,2713 |
| TcCLB.506857.30  | hypothetical protein, conserved                             | 0,1306 | 0,374  |
| TcCLB.507677.70  | hypothetical protein, conserved                             | 0,1303 | 0,3061 |
| TcCLB.506697.40  | helicase, putative                                          | 0,1302 | 0,1777 |



|                  |                                                              |        |         |
|------------------|--------------------------------------------------------------|--------|---------|
| TcCLB.508141.40  | ATP-dependent RNA helicase, putative                         | 0,1301 | 0,07543 |
| TcCLB.509213.80  | hypothetical protein, conserved                              | 0,1301 | 0,3741  |
| TcCLB.508719.60  | kinetoplast DNA-associated protein, putative                 | 0,1301 | 0,4718  |
| TcCLB.503781.30  | hypothetical protein, conserved                              | 0,1301 | 0,5933  |
| TcCLB.511423.90  | zeta tubulin, putative                                       | 0,13   | 0,2711  |
| TcCLB.508409.30  | DNA-directed RNA polymerase II subunit 3, putative (RPB1)    | 0,1298 | 0,188   |
| TcCLB.510877.140 | hypothetical protein, conserved                              | 0,1298 | 0,3298  |
| TcCLB.511003.120 | hypothetical protein, conserved                              | 0,1298 | 0,4168  |
| TcCLB.510377.210 | trans-sialidase (pseudogene), putative                       | 0,1298 | 0,7082  |
| TcCLB.506661.90  | hypothetical protein, conserved                              | 0,1297 | 0,24    |
| TcCLB.507603.190 | hypothetical protein, conserved                              | 0,1297 | 0,2687  |
| TcCLB.507841.14  | retrotransposon hot spot (RHS) protein, putative (fragmer)   | 0,1295 | 0,354   |
| TcCLB.503697.50  | hypothetical protein, conserved                              | 0,1294 | 0,1469  |
| TcCLB.441923.10  | UDP-Gal or UDP-GlcNAc-dependent glycosyltransferase, $\beta$ | 0,1294 | 0,444   |
| TcCLB.511903.290 | hypothetical protein, conserved                              | 0,1292 | 0,1238  |
| TcCLB.479961.20  | retrotransposon hot spot protein (RHS, pseudogene), puta     | 0,129  | 0,457   |
| TcCLB.503797.20  | centrin (pseudogene), putative                               | 0,1287 | 0,4943  |
| TcCLB.511229.70  | hypothetical protein, conserved                              | 0,1286 | 0,4037  |
| TcCLB.511635.80  | hypothetical protein, conserved                              | 0,1284 | 0,4008  |
| TcCLB.511643.4   | hypothetical protein, conserved                              | 0,1284 | 0,637   |
| TcCLB.509985.50  | PrimPol-like protein 1, putative (ppl1)                      | 0,1283 | 0,2311  |
| TcCLB.507623.90  | hypothetical protein, conserved                              | 0,1282 | 0,2173  |
| TcCLB.509979.60  | sec1 family transport protein, putative                      | 0,128  | 0,3081  |
| TcCLB.503495.10  | dispersed gene family protein 1 (DGF-1), putative            | 0,128  | 0,5344  |
| TcCLB.509259.130 | protein kinase, putative                                     | 0,128  | 0,7698  |
| TcCLB.508257.250 | hypothetical protein, conserved                              | 0,1279 | 0,06353 |
| TcCLB.511867.209 | dynein heavy chain, putative (fragment)                      | 0,1279 | 0,2598  |
| TcCLB.508741.250 | hypothetical protein                                         | 0,1278 | 0,1914  |
| TcCLB.510579.14  | hypothetical protein, conserved                              | 0,1277 | 0,2684  |
| TcCLB.507723.110 | acetyltransferase, putative                                  | 0,1277 | 0,3258  |
| TcCLB.506619.10  | sedoheptulose-1,7-bisphosphatase, putative                   | 0,1277 | 0,3495  |
| TcCLB.511001.110 | hypothetical protein, conserved                              | 0,1277 | 0,3944  |
| TcCLB.508209.90  | 10 kDa heat shock protein, putative                          | 0,1277 | 0,776   |
| TcCLB.510297.70  | hypothetical protein                                         | 0,1276 | 0,3235  |
| TcCLB.503801.79  | hypothetical protein, conserved                              | 0,1276 | 0,4394  |
| TcCLB.510517.100 | hypothetical protein, conserved                              | 0,1275 | 0,363   |
| TcCLB.508199.80  | EF hand, putative                                            | 0,1274 | 0,2527  |
| TcCLB.475705.9   | hypothetical protein, conserved                              | 0,1274 | 0,4013  |
| TcCLB.469435.10  | hypothetical protein, conserved                              | 0,1274 | 0,4114  |
| TcCLB.507519.40  | hypothetical protein                                         | 0,1273 | 0,2291  |
| TcCLB.508205.10  | hypothetical protein, conserved                              | 0,1273 | 0,3826  |
| TcCLB.504797.120 | hypothetical protein, conserved                              | 0,1273 | 0,4238  |
| TcCLB.509917.6   | ATP-dependent DEAD/H RNA helicase (pseudogene), puta         | 0,1273 | 0,53    |
| TcCLB.510595.58  | hypothetical protein, conserved                              | 0,1273 | 0,6192  |
| TcCLB.507723.160 | hypothetical protein, conserved                              | 0,1272 | 0,1975  |

|                  |                                                          |        |        |
|------------------|----------------------------------------------------------|--------|--------|
| TcCLB.507795.90  | hypothetical protein, conserved                          | 0,1272 | 0,4462 |
| TcCLB.509109.190 | hypothetical protein, conserved                          | 0,1271 | 0,4301 |
| TcCLB.509503.9   | dispersed gene family protein 1 (DGF-1), putative (fragm | 0,1271 | 0,6893 |
| TcCLB.506247.70  | nuclear pore complex protein (NUP155), putative          | 0,127  | 0,1037 |
| TcCLB.508965.100 | hypothetical protein, conserved                          | 0,127  | 0,1984 |
| TcCLB.506213.100 | hypothetical protein, conserved                          | 0,1268 | 0,3234 |
| TcCLB.506925.260 | protein kinase, putative                                 | 0,1268 | 0,3248 |
| TcCLB.508989.30  | RNA-binding protein, putative                            | 0,1267 | 0,2397 |
| TcCLB.511421.20  | Non cytoplasmic domain containing protein, conserved     | 0,1266 | 0,2759 |
| TcCLB.509233.40  | hypothetical protein, conserved                          | 0,1266 | 0,3891 |
| TcCLB.506227.180 | ras-related protein RAB5B, putative (RAB5B)              | 0,1265 | 0,2117 |
| TcCLB.507951.270 | LETM1 and EF-hand domain-containing protein 1, putative  | 0,1265 | 0,234  |
| TcCLB.508407.10  | membrane associated protein, putative                    | 0,1265 | 0,3593 |
| TcCLB.510329.340 | hypothetical protein, conserved                          | 0,1264 | 0,3127 |
| TcCLB.509037.30  | hypothetical protein, conserved                          | 0,1263 | 0,3471 |
| TcCLB.508421.40  | hypothetical protein, conserved (pseudogene)             | 0,1263 | 0,7401 |
| TcCLB.506577.110 | hypothetical protein, conserved                          | 0,1262 | 0,4996 |
| TcCLB.507867.70  | prefoldin subunit, putative                              | 0,1261 | 0,4618 |
| TcCLB.508349.10  | hypothetical protein, conserved                          | 0,126  | 0,3683 |
| TcCLB.511871.4   | dynein heavy chain, putative                             | 0,1258 | 0,4673 |
| TcCLB.503999.70  | ras-family member, GTP-binding protein, putative         | 0,1257 | 0,221  |
| TcCLB.503425.10  | hypothetical protein, conserved                          | 0,1254 | 0,3111 |
| TcCLB.503421.20  | hypothetical protein, conserved (pseudogene)             | 0,1254 | 0,4565 |
| TcCLB.510221.30  | hypothetical protein, conserved                          | 0,1253 | 0,1377 |
| TcCLB.510101.200 | zinc finger ccch and cchc domain-containing protein      | 0,1253 | 0,2309 |
| TcCLB.510969.4   | hypothetical protein                                     | 0,1253 | 0,6309 |
| TcCLB.509769.130 | DNA polymerase zeta catalytic subunit, putative          | 0,125  | 0,1109 |
| TcCLB.508257.80  | hypothetical protein, conserved                          | 0,125  | 0,1523 |
| TcCLB.506241.150 | hypothetical protein                                     | 0,125  | 0,3    |
| TcCLB.511265.10  | dispersed gene family protein 1 (DGF-1, pseudogene), put | 0,125  | 0,4615 |
| TcCLB.509805.130 | prolyl-tRNA synthetase, putative                         | 0,1249 | 0,1363 |
| TcCLB.510303.230 | hypothetical protein, conserved                          | 0,1247 | 0,213  |
| TcCLB.508741.300 | proteasome regulatory non-ATPase subunit 6, putative     | 0,1246 | 0,2157 |
| TcCLB.503885.60  | hypothetical protein, conserved                          | 0,1246 | 0,2993 |
| TcCLB.511389.90  | hypothetical protein, conserved                          | 0,1246 | 0,3839 |
| TcCLB.509151.80  | hypothetical protein, conserved                          | 0,1246 | 0,3939 |
| TcCLB.419417.19  | hypothetical protein, conserved                          | 0,1245 | 0,5881 |
| TcCLB.506175.80  | hypothetical protein, conserved                          | 0,1243 | 0,5007 |
| TcCLB.508547.110 | ATP-dependent DEAD/H RNA helicase, putative              | 0,1242 | 0,19   |
| TcCLB.509369.40  | dispersed gene family protein 1 (DGF-1, pseudogene), put | 0,1242 | 0,6572 |
| TcCLB.510861.80  | hypothetical protein                                     | 0,1241 | 0,3226 |
| TcCLB.509999.110 | serine/threonine-protein kinase, putative                | 0,1241 | 0,3332 |
| TcCLB.506445.80  | hypothetical protein, conserved                          | 0,1241 | 0,3418 |
| TcCLB.509695.10  | aspartyl-tRNA synthetase, putative                       | 0,124  | 0,2876 |
| TcCLB.506925.500 | hypothetical protein, conserved                          | 0,1239 | 0,2335 |

|                  |                                                          |        |        |
|------------------|----------------------------------------------------------|--------|--------|
| TcCLB.508625.100 | hypothetical protein, conserved (pseudogene)             | 0,1238 | 0,2889 |
| TcCLB.511633.20  | hypothetical protein, conserved                          | 0,1238 | 0,3121 |
| TcCLB.504899.30  | hypothetical protein                                     | 0,1238 | 0,4519 |
| TcCLB.506015.50  | hypothetical protein (pseudogene)                        | 0,1238 | 0,7129 |
| TcCLB.509795.89  | phosphoprotein lepp12, putative                          | 0,1236 | 0,361  |
| TcCLB.506829.20  | hypothetical protein, conserved                          | 0,1235 | 0,2349 |
| TcCLB.505807.190 | polynucleotide kinase 3'-phosphatase, putative           | 0,1235 | 0,3753 |
| TcCLB.507515.20  | hypothetical protein, conserved                          | 0,1234 | 0,1517 |
| TcCLB.507087.40  | kinesin, putative                                        | 0,1234 | 0,1936 |
| TcCLB.511727.280 | hypothetical protein, conserved                          | 0,1233 | 0,1642 |
| TcCLB.480975.10  | hypothetical protein, conserved                          | 0,1233 | 0,3529 |
| TcCLB.511145.80  | RNA polymerase II, putative                              | 0,1233 | 0,408  |
| TcCLB.510431.200 | LisH domain-containing protein FOPNL, putative (fopnl)   | 0,1232 | 0,3596 |
| TcCLB.511049.20  | hypothetical protein, conserved                          | 0,1232 | 0,372  |
| TcCLB.508543.120 | hypothetical protein, conserved                          | 0,1232 | 0,499  |
| TcCLB.505193.40  | SUMO1/Ulp2, putative                                     | 0,1231 | 0,2306 |
| TcCLB.504147.340 | hypothetical protein, conserved                          | 0,123  | 0,1597 |
| TcCLB.506559.270 | sarcoplasmic reticulum glycoprotein, putative            | 0,1229 | 0,1492 |
| TcCLB.506945.120 | chromosomal passenger protein, putative (CPC1)           | 0,1228 | 0,3074 |
| TcCLB.509253.10  | hypothetical protein, conserved                          | 0,1228 | 0,3404 |
| TcCLB.508831.90  | hypothetical protein, conserved                          | 0,1228 | 0,489  |
| TcCLB.509163.50  | hypothetical protein                                     | 0,1228 | 0,6693 |
| TcCLB.503865.60  | hypothetical protein, conserved                          | 0,1227 | 0,2861 |
| TcCLB.510221.10  | RNA pseudouridylate synthase, putative                   | 0,1227 | 0,2997 |
| TcCLB.474341.9   | dynein heavy chain, putative                             | 0,1226 | 0,2845 |
| TcCLB.507681.250 | hypothetical protein, conserved                          | 0,1225 | 0,3504 |
| TcCLB.503433.20  | hypothetical protein, conserved                          | 0,1224 | 0,3522 |
| TcCLB.510717.30  | 2-oxoglutarate dehydrogenase E1 component, putative      | 0,1223 | 0,1684 |
| TcCLB.511803.70  | hypothetical protein, conserved                          | 0,1223 | 0,3859 |
| TcCLB.511001.100 | SNF-7-like protein, putative                             | 0,1221 | 0,3176 |
| TcCLB.509047.70  | hypothetical protein, conserved                          | 0,122  | 0,432  |
| TcCLB.509011.70  | adrenodoxin precursor, putative                          | 0,122  | 0,4869 |
| TcCLB.511255.625 | surface protease GP63 (pseudogene), putative             | 0,122  | 0,8261 |
| TcCLB.511863.20  | hypothetical protein, conserved                          | 0,1219 | 0,3145 |
| TcCLB.508257.200 | hypothetical protein, conserved                          | 0,1218 | 0,2017 |
| TcCLB.506811.70  | hypothetical protein                                     | 0,1216 | 0,2323 |
| TcCLB.510879.200 | hypothetical protein, conserved                          | 0,1216 | 0,4204 |
| TcCLB.508689.40  | hypothetical protein, conserved                          | 0,1215 | 0,1953 |
| TcCLB.506155.110 | hypothetical protein, conserved                          | 0,1213 | 0,3119 |
| TcCLB.509877.20  | hypothetical protein, conserved                          | 0,1212 | 0,2928 |
| TcCLB.507857.40  | ATP-dependent DEAD/H RNA helicase, putative              | 0,121  | 0,1993 |
| TcCLB.504121.10  | KU70 protein, putative                                   | 0,1208 | 0,4145 |
| TcCLB.506919.130 | retrotransposon hot spot protein (RHS, pseudogene), puta | 0,1208 | 0,7208 |
| TcCLB.506493.40  | hypothetical protein, conserved                          | 0,1207 | 0,2963 |
| TcCLB.507843.10  | retrotransposon hot spot (RHS) protein, putative         | 0,1207 | 0,4274 |

|                  |                                                               |        |        |
|------------------|---------------------------------------------------------------|--------|--------|
| TcCLB.511537.50  | chaperone DNAJ protein, putative                              | 0,1206 | 0,2734 |
| TcCLB.466529.9   | hypothetical protein, conserved                               | 0,1206 | 0,4771 |
| TcCLB.507119.20  | hypothetical protein, conserved (pseudogene)                  | 0,1205 | 0,2483 |
| TcCLB.505123.4   | ATP-dependent RNA helicase, putative (fragment)               | 0,1205 | 0,2721 |
| TcCLB.511071.45  | tuzin-like (pseudogene), putative                             | 0,1205 | 0,2979 |
| TcCLB.507739.70  | hypothetical protein, conserved                               | 0,1204 | 0,2783 |
| TcCLB.511589.20  | hypothetical protein                                          | 0,1204 | 0,3883 |
| TcCLB.510357.150 | hypothetical protein, conserved                               | 0,1203 | 0,3925 |
| TcCLB.506369.9   | hypothetical protein, conserved                               | 0,1202 | 0,5482 |
| TcCLB.504089.50  | flagellar radial spoke component, putative                    | 0,12   | 0,2881 |
| TcCLB.511367.354 | U1 small nuclear ribonucleoprotein C, putative                | 0,1198 | 0,4179 |
| TcCLB.506885.124 | Enriched in surface-labeled proteome protein 19 (SLS3)        | 0,1197 | 0,295  |
| TcCLB.508987.39  | hypothetical protein, conserved                               | 0,1197 | 0,3196 |
| TcCLB.507895.80  | hypothetical protein, conserved                               | 0,1195 | 0,3053 |
| TcCLB.506337.220 | hypothetical protein                                          | 0,1195 | 0,4492 |
| TcCLB.508857.80  | hypothetical protein, conserved                               | 0,1194 | 0,4937 |
| TcCLB.509571.60  | hypothetical protein, conserved                               | 0,1192 | 0,3411 |
| TcCLB.507601.20  | hypothetical protein, conserved                               | 0,1192 | 0,5593 |
| TcCLB.507677.110 | hypothetical protein                                          | 0,1191 | 0,2569 |
| TcCLB.508205.39  | dynein light chain, putative                                  | 0,1191 | 0,3406 |
| TcCLB.507603.100 | hypothetical protein, conserved                               | 0,119  | 0,381  |
| TcCLB.509717.100 | membrane-bound acid phosphatase 2, putative                   | 0,1188 | 0,2467 |
| TcCLB.508479.240 | hypothetical protein, conserved                               | 0,1188 | 0,2854 |
| TcCLB.511353.40  | eukaryotic translation initiation factor 4E (eIF4E) interacti | 0,1188 | 0,3438 |
| TcCLB.510767.69  | hypothetical protein, conserved                               | 0,1186 | 0,53   |
| TcCLB.460061.10  | hypothetical protein (fragment)                               | 0,1186 | 0,5979 |
| TcCLB.437575.18  | transporter, putative                                         | 0,1185 | 0,5475 |
| TcCLB.511727.310 | Leucine-rich repeat-containing protein ODA7 (ODA7)            | 0,1184 | 0,2966 |
| TcCLB.508949.40  | hypothetical protein, conserved                               | 0,1184 | 0,4133 |
| TcCLB.504149.150 | hypothetical protein, conserved                               | 0,1182 | 0,1691 |
| TcCLB.508889.19  | hypothetical protein                                          | 0,1181 | 0,3889 |
| TcCLB.505975.41  | retrotransposon hot spot protein (RHS, pseudogene), puta      | 0,118  | 0,3219 |
| TcCLB.510181.40  | hypothetical protein, conserved                               | 0,118  | 0,5736 |
| TcCLB.509199.10  | Elongation factor G 2, mitochondrial, putative (EF-G2)        | 0,1179 | 0,2645 |
| TcCLB.506113.10  | retrotransposon hot spot protein (RHS, pseudogene), puta      | 0,1179 | 0,3597 |
| TcCLB.511419.80  | phosphatidylinositol-4-phosphate 5-kinase related             | 0,1179 | 0,4302 |
| TcCLB.506743.190 | hypothetical protein, conserved                               | 0,1179 | 0,4524 |
| TcCLB.509667.31  | hypothetical protein, conserved (pseudogene)                  | 0,1179 | 0,5999 |
| TcCLB.509849.20  | hypothetical protein, conserved                               | 0,1177 | 0,2684 |
| TcCLB.506925.280 | hypothetical protein, conserved                               | 0,1177 | 0,3791 |
| TcCLB.506893.70  | hypothetical protein, conserved                               | 0,1176 | 0,3995 |
| TcCLB.511217.70  | hypothetical protein, conserved                               | 0,1175 | 0,2059 |
| TcCLB.508817.40  | hypothetical protein, conserved                               | 0,1175 | 0,2512 |
| TcCLB.506529.330 | hypothetical protein, conserved                               | 0,1175 | 0,4674 |
| TcCLB.505065.30  | carnitine O-palmitoyltransferase (pseudogene), putative       | 0,1175 | 0,7366 |

|                  |                                                      |        |        |
|------------------|------------------------------------------------------|--------|--------|
| TcCLB.511741.50  | C-1-tetrahydrofolate synthase, cytoplasmic, putative | 0,1173 | 0,4283 |
| TcCLB.510797.10  | 2-oxoglutarate dehydrogenase subunit, putative       | 0,1172 | 0,4082 |
| TcCLB.510091.130 | hypothetical protein, conserved                      | 0,117  | 0,2494 |
| TcCLB.508317.60  | hypothetical protein, conserved                      | 0,117  | 0,4657 |
| TcCLB.508479.450 | hypothetical protein, conserved (pseudogene)         | 0,1169 | 0,4858 |
| TcCLB.504867.50  | hypothetical protein, conserved                      | 0,1168 | 0,2659 |
| TcCLB.507009.130 | hypothetical protein, conserved                      | 0,1167 | 0,2813 |
| TcCLB.507723.140 | hypothetical protein, conserved                      | 0,1167 | 0,4152 |
| TcCLB.511217.150 | hypothetical protein, conserved                      | 0,1166 | 0,4341 |
| TcCLB.510123.60  | hypothetical protein, conserved                      | 0,1164 | 0,3552 |
| TcCLB.508347.100 | hypothetical protein, conserved                      | 0,1163 | 0,2685 |
| TcCLB.509877.10  | hypothetical protein, conserved                      | 0,1163 | 0,4032 |
| TcCLB.503399.29  | hydrolase-like protein                               | 0,1163 | 0,5748 |
| TcCLB.504159.30  | hypothetical protein, conserved                      | 0,1162 | 0,3831 |
| TcCLB.509979.40  | hypothetical protein, conserved                      | 0,1161 | 0,4123 |
| TcCLB.507837.40  | hypothetical protein, conserved                      | 0,1161 | 0,4499 |
| TcCLB.509069.14  | hypothetical protein, conserved                      | 0,116  | 0,3716 |
| TcCLB.510659.100 | hypothetical protein, conserved                      | 0,1159 | 0,4796 |
| TcCLB.510311.60  | hypothetical protein, conserved                      | 0,1156 | 0,1905 |
| TcCLB.505989.78  | hypothetical protein, conserved                      | 0,1156 | 0,4338 |
| TcCLB.508173.230 | hypothetical protein, conserved                      | 0,1155 | 0,2954 |
| TcCLB.508667.30  | hypothetical protein, conserved                      | 0,1154 | 0,3701 |
| TcCLB.506825.180 | protein kinase, putative                             | 0,1153 | 0,1793 |
| TcCLB.507601.90  | hypothetical protein, conserved                      | 0,1153 | 0,3175 |
| TcCLB.510579.60  | heat shock protein, putative                         | 0,1153 | 0,3472 |
| TcCLB.507579.30  | surface protease GP63 (pseudogene), putative         | 0,1153 | 0,7197 |
| TcCLB.506111.20  | dispersed gene family protein 1 (DGF-1), putative    | 0,1152 | 0,5295 |
| TcCLB.507257.180 | hypothetical protein                                 | 0,115  | 0,2625 |
| TcCLB.511409.50  | hypothetical protein, conserved                      | 0,1149 | 0,3543 |
| TcCLB.506265.45  | chaperone DNAJ protein, putative                     | 0,1148 | 0,4865 |
| TcCLB.508117.30  | elongation factor 1-gamma (EF-1-gamma, pseudogene),  | 0,1146 | 0,632  |
| TcCLB.506241.70  | calcium motive p-type ATPase, putative               | 0,1143 | 0,2143 |
| TcCLB.508113.14  | mucin TcMUC (pseudogene), putative                   | 0,1143 | 0,5903 |
| TcCLB.503455.30  | hypothetical protein, conserved                      | 0,1142 | 0,3157 |
| TcCLB.507045.5   | trans-sialidase (pseudogene), putative               | 0,1141 | 0,7841 |
| TcCLB.506595.120 | trans-sialidase (pseudogene), putative               | 0,1139 | 0,3994 |
| TcCLB.506067.189 | trans-sialidase (pseudogene), putative               | 0,1139 | 0,7127 |
| TcCLB.508139.120 | hypothetical protein                                 | 0,1139 | 0,7339 |
| TcCLB.510609.90  | hypothetical protein, conserved                      | 0,1138 | 0,2625 |
| TcCLB.507611.320 | hypothetical protein, conserved                      | 0,1138 | 0,4321 |
| TcCLB.506215.10  | hypothetical protein                                 | 0,1137 | 0,6505 |
| TcCLB.509167.60  | hypothetical protein, conserved                      | 0,1135 | 0,2581 |
| TcCLB.511449.40  | mucin TcMUCII (pseudogene), putative                 | 0,1135 | 0,7225 |
| TcCLB.511277.480 | hypothetical protein, conserved                      | 0,1132 | 0,3146 |
| TcCLB.506203.20  | dynein light chain, putative                         | 0,1132 | 0,3607 |

|                  |                                                            |        |        |
|------------------|------------------------------------------------------------|--------|--------|
| TcCLB.508357.30  | hypothetical protein, conserved                            | 0,1131 | 0,4241 |
| TcCLB.506175.60  | GTPase activator protein, putative                         | 0,1129 | 0,312  |
| TcCLB.506811.140 | hypothetical protein, conserved                            | 0,1129 | 0,3315 |
| TcCLB.507277.10  | hypothetical protein, conserved                            | 0,1129 | 0,3931 |
| TcCLB.507881.30  | glycine dehydrogenase [decarboxylating] (pseudogene), p    | 0,1126 | 0,6853 |
| TcCLB.508887.30  | hypothetical protein                                       | 0,1126 | 0,699  |
| TcCLB.503617.15  | U6 snRNA-associated Sm-like protein LSm3p                  | 0,1119 | 0,6484 |
| TcCLB.509161.60  | hypothetical protein, conserved                            | 0,1118 | 0,2736 |
| TcCLB.510099.100 | hypothetical protein, conserved                            | 0,1117 | 0,2761 |
| TcCLB.508013.120 | elongation factor 1-alpha (ef-1-alpha), putative           | 0,1116 | 0,756  |
| TcCLB.510877.60  | ruvB-like DNA helicase, putative (RUVBL)                   | 0,1114 | 0,1879 |
| TcCLB.510073.80  | hypothetical protein, conserved                            | 0,1114 | 0,255  |
| TcCLB.504507.10  | hypothetical protein, conserved                            | 0,1114 | 0,4267 |
| TcCLB.507519.90  | hypothetical protein, conserved                            | 0,1113 | 0,4363 |
| TcCLB.511313.20  | hypothetical protein, conserved                            | 0,1112 | 0,4029 |
| TcCLB.506211.50  | membrane protein, putative                                 | 0,1112 | 0,449  |
| TcCLB.506999.40  | metacaspase 5, putative                                    | 0,111  | 0,2557 |
| TcCLB.506627.110 | hypothetical protein, conserved                            | 0,111  | 0,27   |
| TcCLB.505989.70  | surface protease GP63, putative                            | 0,111  | 0,4091 |
| TcCLB.504171.30  | hypothetical protein, conserved                            | 0,1109 | 0,2693 |
| TcCLB.504251.20  | hypothetical protein, conserved                            | 0,1106 | 0,4817 |
| TcCLB.507513.100 | hypothetical protein, conserved                            | 0,1105 | 0,3194 |
| TcCLB.511321.40  | hypothetical protein, conserved                            | 0,1105 | 0,3389 |
| TcCLB.504109.40  | hypothetical protein, conserved                            | 0,1105 | 0,3961 |
| TcCLB.511295.70  | hypothetical protein, conserved (fragment)                 | 0,1105 | 0,7616 |
| TcCLB.511577.70  | hypothetical protein, conserved                            | 0,1104 | 0,3903 |
| TcCLB.509213.100 | 3-ketoacyl-CoA reductase, putative                         | 0,1102 | 0,2804 |
| TcCLB.511587.75  | hypothetical protein                                       | 0,1102 | 0,7516 |
| TcCLB.508127.9   | hypothetical protein, conserved                            | 0,1101 | 0,3196 |
| TcCLB.511751.180 | pseudouridine synthase A-like protein, putative            | 0,11   | 0,3799 |
| TcCLB.503789.10  | hypothetical protein                                       | 0,11   | 0,5381 |
| TcCLB.503927.9   | dynein light intermediate chain, putative                  | 0,1098 | 0,3299 |
| TcCLB.506941.9   | endosomal trafficking protein RME-8, putative              | 0,1098 | 0,3596 |
| TcCLB.506223.120 | phosphatidylinositol 3-related kinase, putative            | 0,1097 | 0,2122 |
| TcCLB.504431.90  | U2 small nuclear ribonucleoprotein B, putative             | 0,1097 | 0,5396 |
| TcCLB.508237.18  | SNF2 DNA repair protein, putative                          | 0,1096 | 0,3816 |
| TcCLB.506739.10  | Eukaryotic translation initiation factor 4 gamma type 1, p | 0,1096 | 0,4223 |
| TcCLB.510491.20  | dynein light chain, putative                               | 0,1096 | 0,5185 |
| TcCLB.510877.120 | NADPH-dependent FMN/FAD containing oxidoreductase, p       | 0,1095 | 0,3088 |
| TcCLB.511801.70  | hypothetical protein, conserved                            | 0,1094 | 0,3823 |
| TcCLB.510733.60  | DNA polymerase epsilon catalytic subunit, putative         | 0,1093 | 0,2492 |
| TcCLB.509805.100 | hypothetical protein, conserved                            | 0,1093 | 0,3054 |
| TcCLB.506529.610 | hypothetical protein                                       | 0,1092 | 0,6625 |
| TcCLB.511481.20  | hypothetical protein, conserved                            | 0,1091 | 0,5459 |
| TcCLB.510575.150 | hypothetical protein, conserved                            | 0,1089 | 0,2945 |

|                  |                                                          |        |        |
|------------------|----------------------------------------------------------|--------|--------|
| TcCLB.507611.110 | retrotransposon hot spot (RHS) protein, putative         | 0,1089 | 0,4114 |
| TcCLB.506401.190 | hypothetical protein, conserved                          | 0,1089 | 0,4536 |
| TcCLB.508355.40  | choline/carnitine O-acetyltransferase, putative          | 0,1089 | 0,5371 |
| TcCLB.511439.80  | hypothetical protein, conserved                          | 0,1087 | 0,24   |
| TcCLB.506203.25  | hypothetical protein                                     | 0,1087 | 0,3359 |
| TcCLB.509899.110 | orotidine-5-phosphate decarboxylase/orotate phosphoribc  | 0,1086 | 0,322  |
| TcCLB.504149.201 | ATP-dependent DEAD/H RNA helicase (pseudogene), puta     | 0,1086 | 0,6424 |
| TcCLB.506629.150 | hypothetical protein, conserved                          | 0,1083 | 0,3801 |
| TcCLB.507519.100 | hypothetical protein, conserved                          | 0,1083 | 0,6013 |
| TcCLB.506479.67  | hypothetical protein, conserved                          | 0,1082 | 0,3304 |
| TcCLB.506777.70  | cdc2-related kinase 8, putative (CRK8)                   | 0,1081 | 0,3221 |
| TcCLB.503887.10  | hypothetical protein, conserved                          | 0,1079 | 0,5118 |
| TcCLB.508465.130 | hypothetical protein, conserved                          | 0,1078 | 0,354  |
| TcCLB.511395.50  | hypothetical protein, conserved                          | 0,1076 | 0,3933 |
| TcCLB.506773.170 | hypothetical protein, conserved                          | 0,1074 | 0,3823 |
| TcCLB.511291.100 | Vesicle-trafficking protein SEC22, putative (SEC22)      | 0,1074 | 0,4188 |
| TcCLB.508181.20  | 6-phosphofructo-2-kinase 1                               | 0,1071 | 0,2827 |
| TcCLB.505965.30  | prenyltransferase, putative                              | 0,1071 | 0,4468 |
| TcCLB.507031.130 | hypothetical protein, conserved                          | 0,1069 | 0,3421 |
| TcCLB.508501.220 | hypothetical protein, conserved                          | 0,1069 | 0,3489 |
| TcCLB.506367.100 | hypothetical protein, conserved                          | 0,1069 | 0,4727 |
| TcCLB.506513.50  | protein kinase, putative                                 | 0,1068 | 0,4082 |
| TcCLB.506503.4   | transporter, putative                                    | 0,1068 | 0,4418 |
| TcCLB.506145.40  | hypothetical protein, conserved                          | 0,1066 | 0,2444 |
| TcCLB.507165.30  | hypothetical protein, conserved                          | 0,1065 | 0,4327 |
| TcCLB.504109.90  | cysteine peptidase, Clan CA, family C12, putative        | 0,1064 | 0,4746 |
| TcCLB.509127.104 | ARP2/3 complex subunit, putative                         | 0,1064 | 0,6075 |
| TcCLB.506319.5   | hypothetical protein, conserved (fragment)               | 0,1064 | 0,6959 |
| TcCLB.509995.29  | hypothetical protein, conserved                          | 0,1063 | 0,5298 |
| TcCLB.509911.80  | hypothetical protein, conserved                          | 0,1062 | 0,4387 |
| TcCLB.506507.40  | trans-sialidase (pseudogene), putative                   | 0,106  | 0,4179 |
| TcCLB.503669.20  | hypothetical protein, conserved                          | 0,1057 | 0,465  |
| TcCLB.511529.30  | hypothetical protein, conserved                          | 0,1057 | 0,4739 |
| TcCLB.510913.10  | dispersed gene family protein 1 (DGF-1), putative (fragm | 0,1057 | 0,5833 |
| TcCLB.510421.240 | diacylglycerol acyltransferase, putative                 | 0,1056 | 0,507  |
| TcCLB.510329.300 | hypothetical protein, conserved                          | 0,1056 | 0,5082 |
| TcCLB.507057.50  | hypothetical protein, conserved                          | 0,1055 | 0,3968 |
| TcCLB.509631.100 | hypothetical protein, conserved (pseudogene)             | 0,1054 | 0,8155 |
| TcCLB.510535.70  | hypothetical protein, conserved                          | 0,1053 | 0,3876 |
| TcCLB.507023.170 | hypothetical protein, conserved                          | 0,1053 | 0,3909 |
| TcCLB.511127.410 | hypothetical protein, conserved                          | 0,1052 | 0,2664 |
| TcCLB.506223.90  | hypothetical protein, conserved                          | 0,1052 | 0,4037 |
| TcCLB.507675.30  | hypothetical protein, conserved                          | 0,1051 | 0,571  |
| TcCLB.508257.210 | hypothetical protein, conserved                          | 0,105  | 0,398  |
| TcCLB.506729.90  | hypothetical protein, conserved                          | 0,1049 | 0,3841 |

|                  |                                                          |        |        |
|------------------|----------------------------------------------------------|--------|--------|
| TcCLB.508515.110 | hypothetical protein, conserved                          | 0,1048 | 0,3075 |
| TcCLB.506241.19  | dispersed gene family protein 1 (DGF-1), putative        | 0,1048 | 0,5955 |
| TcCLB.439301.9   | hypothetical protein, conserved                          | 0,1047 | 0,3227 |
| TcCLB.507089.154 | hypothetical protein, conserved                          | 0,1046 | 0,2224 |
| TcCLB.510121.80  | hypothetical protein, conserved                          | 0,1045 | 0,2994 |
| TcCLB.509103.10  | hypothetical protein, conserved                          | 0,1044 | 0,4143 |
| TcCLB.508461.350 | hypothetical protein, conserved                          | 0,1043 | 0,3382 |
| TcCLB.507053.120 | hypothetical protein, conserved                          | 0,1043 | 0,426  |
| TcCLB.509335.20  | retrotransposon hot spot protein (RHS, pseudogene), puta | 0,1043 | 0,5777 |
| TcCLB.506401.100 | DNA polymerase sigma, putative                           | 0,1042 | 0,2214 |
| TcCLB.506959.74  | hypothetical protein, conserved                          | 0,1042 | 0,3443 |
| TcCLB.511349.61  | retrotransposon hot spot protein (RHS, pseudogene), puta | 0,1041 | 0,8268 |
| TcCLB.436535.10  | hypothetical protein, conserved                          | 0,104  | 0,5559 |
| TcCLB.511843.35  | hypothetical protein                                     | 0,104  | 0,6974 |
| TcCLB.510315.4   | hypothetical protein, conserved (fragment)               | 0,1035 | 0,53   |
| TcCLB.511323.20  | hypothetical protein, conserved                          | 0,1035 | 0,5563 |
| TcCLB.507305.20  | casein kinase, putative                                  | 0,1034 | 0,2657 |
| TcCLB.508699.110 | elongation factor G2-like protein, putative              | 0,1034 | 0,5456 |
| TcCLB.510265.80  | hypothetical protein, conserved                          | 0,1033 | 0,3608 |
| TcCLB.506393.166 | ATP-dependent DEAD/H RNA helicase (pseudogene), puta     | 0,1033 | 0,749  |
| TcCLB.504255.50  | hypothetical protein, conserved                          | 0,1032 | 0,4168 |
| TcCLB.511871.130 | retrotransposon hot spot (RHS) protein, putative         | 0,1032 | 0,4433 |
| TcCLB.507081.120 | hypothetical protein, conserved                          | 0,1031 | 0,4513 |
| TcCLB.507649.50  | hypothetical protein, conserved                          | 0,1029 | 0,2559 |
| TcCLB.503713.20  | hypothetical protein, conserved                          | 0,1028 | 0,539  |
| TcCLB.510783.30  | dispersed gene family protein 1 (DGF-1, pseudogene), put | 0,1028 | 0,7527 |
| TcCLB.509537.70  | hypothetical protein, conserved                          | 0,1027 | 0,4151 |
| TcCLB.509109.40  | hypothetical protein, conserved                          | 0,1027 | 0,4607 |
| TcCLB.511867.90  | hypothetical protein, conserved                          | 0,1027 | 0,472  |
| TcCLB.508779.9   | hypothetical protein, conserved (fragment)               | 0,1023 | 0,4663 |
| TcCLB.437349.10  | hypothetical protein, conserved                          | 0,1021 | 0,5413 |
| TcCLB.511189.100 | hypothetical protein, conserved                          | 0,102  | 0,4373 |
| TcCLB.506679.80  | SNF1-related protein kinases, putative                   | 0,1019 | 0,3397 |
| TcCLB.511903.270 | hypothetical protein, conserved                          | 0,1019 | 0,6204 |
| TcCLB.508409.130 | protein transport protein Sec24A, putative               | 0,1018 | 0,202  |
| TcCLB.503791.10  | TPR-repeat-containing chaperone protein DNAJ, putative ( | 0,1018 | 0,4446 |
| TcCLB.477935.9   | calpain-like cysteine peptidase (pseudogene), putative   | 0,1018 | 0,5215 |
| TcCLB.508247.140 | hypothetical protein                                     | 0,1018 | 0,7167 |
| TcCLB.507601.80  | hypothetical protein, conserved                          | 0,1017 | 0,5232 |
| TcCLB.507715.40  | GTP-binding elongation factor Tu family, putative        | 0,1016 | 0,2518 |
| TcCLB.511817.220 | kinesin, putative                                        | 0,1016 | 0,3354 |
| TcCLB.510595.49  | hypothetical protein, conserved                          | 0,1015 | 0,4083 |
| TcCLB.511735.30  | hypothetical protein, conserved                          | 0,1015 | 0,5945 |
| TcCLB.510747.34  | hypothetical protein, conserved                          | 0,1014 | 0,4995 |
| TcCLB.507019.120 | hypothetical protein, conserved                          | 0,1013 | 0,5166 |



|                  |                                                       |         |        |
|------------------|-------------------------------------------------------|---------|--------|
| TcCLB.508707.70  | hypothetical protein, conserved                       | 0,1012  | 0,2127 |
| TcCLB.504343.10  | trans-sialidase, Group II, putative                   | 0,1012  | 0,5443 |
| TcCLB.510119.30  | hypothetical protein, conserved                       | 0,1011  | 0,5009 |
| TcCLB.510283.90  | hypothetical protein, conserved                       | 0,101   | 0,3874 |
| TcCLB.507991.70  | hypothetical protein, conserved                       | 0,1009  | 0,4547 |
| TcCLB.510181.140 | hypothetical protein, conserved                       | 0,1008  | 0,5051 |
| TcCLB.506883.69  | hypothetical protein, conserved                       | 0,1008  | 0,637  |
| TcCLB.511321.60  | hypothetical protein, conserved                       | 0,1008  | 0,6923 |
| TcCLB.510231.20  | hypothetical protein                                  | 0,1007  | 0,3935 |
| TcCLB.508409.40  | Putative intraflagellar transport protein B2 (PIFTB2) | 0,1004  | 0,3522 |
| TcCLB.509951.20  | hypothetical protein, conserved                       | 0,1004  | 0,6882 |
| TcCLB.506627.90  | hypothetical protein                                  | 0,1003  | 0,2528 |
| TcCLB.509229.140 | hypothetical protein, conserved                       | 0,1003  | 0,3201 |
| TcCLB.508623.10  | trans-sialidase (pseudogene), putative                | 0,1003  | 0,3396 |
| TcCLB.506701.29  | hypothetical protein, conserved                       | 0,1003  | 0,557  |
| TcCLB.503717.130 | trans-sialidase (pseudogene), putative                | 0,1003  | 0,7404 |
| TcCLB.503943.14  | hypothetical protein, conserved                       | 0,1002  | 0,4549 |
| TcCLB.511727.160 | hypothetical protein, conserved                       | 0,1001  | 0,232  |
| TcCLB.511909.70  | hypothetical protein, conserved                       | 0,1001  | 0,5594 |
| TcCLB.511733.40  | FUN14 family, putative (POMP32)                       | 0,1001  | 0,5876 |
| TcCLB.511673.9   | hypothetical protein, conserved                       | 0,09985 | 0,6422 |
| TcCLB.510291.30  | protein phosphatase 2C-like, putative                 | 0,09982 | 0,4898 |
| TcCLB.511109.30  | dynein intermediate chain, putative                   | 0,09969 | 0,4574 |
| TcCLB.510975.40  | hypothetical protein, conserved                       | 0,09954 | 0,2598 |
| TcCLB.511001.160 | hypothetical protein, conserved                       | 0,09953 | 0,3313 |
| TcCLB.511589.150 | hypothetical protein, conserved                       | 0,09953 | 0,5882 |
| TcCLB.509837.20  | hypothetical protein, conserved                       | 0,09948 | 0,2602 |
| TcCLB.509167.10  | hypothetical protein, conserved                       | 0,09932 | 0,3927 |
| TcCLB.511277.180 | hypothetical protein, conserved                       | 0,09931 | 0,3518 |
| TcCLB.510613.20  | kinesin, putative                                     | 0,09924 | 0,4262 |
| TcCLB.510517.60  | hypothetical protein, conserved                       | 0,09921 | 0,4856 |
| TcCLB.509179.160 | hypothetical protein, conserved                       | 0,09913 | 0,4226 |
| TcCLB.511525.29  | hypothetical protein, conserved                       | 0,0991  | 0,321  |
| TcCLB.506277.10  | mucin-associated surface protein (MASP), putative     | 0,09909 | 0,6935 |
| TcCLB.509243.50  | sigma-adaptin 3, putative                             | 0,09889 | 0,5364 |
| TcCLB.507491.90  | protein kinase, putative                              | 0,09885 | 0,4922 |
| TcCLB.509911.60  | hypothetical protein                                  | 0,09879 | 0,3343 |
| TcCLB.511925.60  | hypothetical protein, conserved                       | 0,09872 | 0,4891 |
| TcCLB.504149.55  | acyl-CoA thioesterase, putative                       | 0,09869 | 0,2807 |
| TcCLB.511711.80  | Ras-related protein RAB2B, putative (RAB2B)           | 0,09863 | 0,4328 |
| TcCLB.506677.30  | hypothetical protein, conserved                       | 0,09861 | 0,3948 |
| TcCLB.510661.160 | hypothetical protein, conserved                       | 0,09855 | 0,4883 |
| TcCLB.509641.60  | hypothetical protein, conserved                       | 0,09848 | 0,5536 |
| TcCLB.511321.26  | vesicle transport v-SNARE protein, putative           | 0,09845 | 0,528  |
| TcCLB.508445.40  | hypothetical protein, conserved                       | 0,09837 | 0,5214 |

|                  |                                                          |         |        |
|------------------|----------------------------------------------------------|---------|--------|
| TcCLB.508815.90  | hypothetical protein, conserved                          | 0,09829 | 0,4509 |
| TcCLB.506925.330 | hypothetical protein, conserved                          | 0,09816 | 0,2512 |
| TcCLB.507381.31  | retrotransposon hot spot protein (RHS, pseudogene), puta | 0,0981  | 0,4383 |
| TcCLB.511283.294 | b9 domain-containing protein 1 (b9d1)                    | 0,09806 | 0,3349 |
| TcCLB.504149.117 | hypothetical protein, conserved                          | 0,098   | 0,38   |
| TcCLB.510859.40  | hypothetical protein, conserved                          | 0,09797 | 0,5104 |
| TcCLB.510835.30  | hypothetical protein, conserved                          | 0,09785 | 0,5023 |
| TcCLB.506825.120 | hypothetical protein, conserved                          | 0,0977  | 0,2631 |
| TcCLB.510659.44  | cysteine desulfurase, putative                           | 0,09763 | 0,3921 |
| TcCLB.511725.110 | hypothetical protein, conserved                          | 0,09746 | 0,5747 |
| TcCLB.509165.49  | damage-specific DNA binding protein, putative            | 0,09731 | 0,4682 |
| TcCLB.511587.100 | retrotransposon hot spot (RHS) protein, putative         | 0,09713 | 0,373  |
| TcCLB.510155.115 | hypothetical protein, conserved                          | 0,0969  | 0,4017 |
| TcCLB.511661.100 | protein kinase, putative                                 | 0,09676 | 0,2771 |
| TcCLB.506789.170 | ATPase, putative                                         | 0,09674 | 0,4423 |
| TcCLB.508441.50  | hypothetical protein, conserved                          | 0,09668 | 0,6122 |
| TcCLB.510659.219 | hypothetical protein, conserved                          | 0,09663 | 0,4966 |
| TcCLB.508717.20  | NADH dehydrogenase, putative                             | 0,09661 | 0,3895 |
| TcCLB.503689.10  | small GTP-binding protein Rab7, putative                 | 0,09657 | 0,4321 |
| TcCLB.511685.50  | hypothetical protein, conserved                          | 0,09634 | 0,5518 |
| TcCLB.507559.90  | hypothetical protein                                     | 0,09628 | 0,2664 |
| TcCLB.506649.80  | RNA-binding protein, putative (DRBD3)                    | 0,09622 | 0,2129 |
| TcCLB.440099.10  | hypothetical protein                                     | 0,09622 | 0,5216 |
| TcCLB.481729.20  | hypothetical protein, conserved                          | 0,09615 | 0,7086 |
| TcCLB.510351.130 | hypothetical protein, conserved                          | 0,09603 | 0,5067 |
| TcCLB.510187.430 | DNA mismatch repair protein MSH6, putative (MSH6)        | 0,09595 | 0,2356 |
| TcCLB.508963.10  | Flagellar Member 3 (pseudogene)                          | 0,09594 | 0,3204 |
| TcCLB.503685.30  | carnitine/choline acetyltransferase, putative            | 0,09594 | 0,5177 |
| TcCLB.504013.30  | hypothetical protein, conserved                          | 0,09578 | 0,5823 |
| TcCLB.508851.50  | hypothetical protein, conserved                          | 0,09573 | 0,4914 |
| TcCLB.507951.250 | tRNA isopentenyltransferase, putative                    | 0,09571 | 0,4631 |
| TcCLB.508193.20  | retrotransposon hot spot protein (RHS, pseudogene), puta | 0,09565 | 0,3059 |
| TcCLB.506821.140 | histone deacetylase, putative                            | 0,0956  | 0,4432 |
| TcCLB.510681.20  | myosin heavy chain kinase A, putative                    | 0,09547 | 0,4843 |
| TcCLB.503401.20  | hypothetical protein, conserved                          | 0,09542 | 0,5961 |
| TcCLB.508515.170 | retrotransposon hot spot protein (RHS, pseudogene), puta | 0,09541 | 0,4681 |
| TcCLB.511025.10  | dynein light intermediate chain, putative                | 0,0953  | 0,4    |
| TcCLB.504741.220 | hypothetical protein, conserved                          | 0,09516 | 0,4868 |
| TcCLB.508379.20  | hypothetical protein, conserved                          | 0,09511 | 0,671  |
| TcCLB.503811.80  | hypothetical protein, conserved                          | 0,0951  | 0,4626 |
| TcCLB.504717.20  | hypothetical protein, conserved                          | 0,09501 | 0,2856 |
| TcCLB.506517.100 | hypothetical protein, conserved                          | 0,09479 | 0,362  |
| TcCLB.509149.50  | hypothetical protein, conserved                          | 0,09472 | 0,3272 |
| TcCLB.506147.150 | hypothetical protein, conserved                          | 0,09466 | 0,3993 |
| TcCLB.504085.50  | ATP-dependent DEAD/H RNA helicase, putative              | 0,09458 | 0,4029 |

|                  |                                                            |         |        |
|------------------|------------------------------------------------------------|---------|--------|
| TcCLB.509145.10  | hypothetical protein, conserved                            | 0,09448 | 0,4398 |
| TcCLB.509563.30  | hypothetical protein, conserved                            | 0,09438 | 0,3902 |
| TcCLB.511511.150 | sphingosine 1-phosphate lyase, putative (SPL)              | 0,09433 | 0,4966 |
| TcCLB.404843.20  | hypothetical protein, conserved                            | 0,09426 | 0,4516 |
| TcCLB.506339.25  | hypothetical protein, conserved (pseudogene)               | 0,09424 | 0,6352 |
| TcCLB.508153.90  | hypothetical protein                                       | 0,09421 | 0,5062 |
| TcCLB.508289.41  | syntaxin binding protein (pseudogene), putative            | 0,09419 | 0,7478 |
| TcCLB.511269.10  | hypothetical protein, conserved                            | 0,09418 | 0,3889 |
| TcCLB.507467.100 | hypothetical protein                                       | 0,09418 | 0,3935 |
| TcCLB.508355.350 | hypothetical protein, conserved                            | 0,09403 | 0,4495 |
| TcCLB.510173.40  | MRB1 complex subunit MRB3010 (MRB3010)                     | 0,09402 | 0,3722 |
| TcCLB.511255.618 | syntaxin binding protein (pseudogene), putative            | 0,09401 | 0,846  |
| TcCLB.506539.10  | trans-sialidase (pseudogene), putative                     | 0,094   | 0,7255 |
| TcCLB.509827.4   | retrotransposon hot spot (RHS) protein, putative           | 0,09388 | 0,6248 |
| TcCLB.507819.20  | retrotransposon hot spot protein (RHS, pseudogene), puta   | 0,09377 | 0,5029 |
| TcCLB.434931.10  | paraxonemal rod protein PAR2, putative                     | 0,09372 | 0,4493 |
| TcCLB.510719.110 | actin-like protein, putative                               | 0,09367 | 0,5009 |
| TcCLB.508153.370 | hypothetical protein, conserved                            | 0,09364 | 0,3712 |
| TcCLB.506405.60  | hypothetical protein, conserved                            | 0,09353 | 0,5478 |
| TcCLB.506331.30  | hypothetical protein                                       | 0,09352 | 0,7974 |
| TcCLB.507047.20  | dispersed gene family protein 1 (DGF-1, pseudogene), put   | 0,0935  | 0,6026 |
| TcCLB.508541.240 | casein kinase, putative                                    | 0,09341 | 0,7739 |
| TcCLB.504109.140 | DNA-directed RNA polymerase I subunit, putative            | 0,09324 | 0,5069 |
| TcCLB.511217.160 | hypothetical protein, conserved                            | 0,0932  | 0,417  |
| TcCLB.433273.10  | dynein heavy chain, putative (fragment)                    | 0,09315 | 0,474  |
| TcCLB.508931.50  | hypothetical protein                                       | 0,09308 | 0,4601 |
| TcCLB.510713.20  | dispersed gene family protein 1 (DGF-1), putative          | 0,09308 | 0,6109 |
| TcCLB.510329.210 | SNF1-related protein kinase catalytic subunit alpha, putat | 0,09304 | 0,3364 |
| TcCLB.511585.220 | calcium/potassium channel (CAKC), putative                 | 0,09299 | 0,3353 |
| TcCLB.503451.9   | hypothetical protein, conserved (fragment)                 | 0,09291 | 0,2986 |
| TcCLB.508027.50  | hypothetical protein, conserved                            | 0,0929  | 0,5209 |
| TcCLB.509287.140 | dispersed gene family protein 1 (DGF-1), putative          | 0,09262 | 0,6517 |
| TcCLB.503521.60  | hypothetical protein, conserved                            | 0,09257 | 0,6327 |
| TcCLB.510889.240 | hypothetical protein, conserved                            | 0,09252 | 0,5611 |
| TcCLB.511071.30  | hypothetical protein, conserved                            | 0,09239 | 0,5733 |
| TcCLB.511109.20  | hypothetical protein, conserved                            | 0,09231 | 0,6242 |
| TcCLB.509857.10  | hypothetical protein, conserved                            | 0,09225 | 0,4534 |
| TcCLB.510007.10  | hypothetical protein, conserved                            | 0,09221 | 0,5924 |
| TcCLB.509631.140 | flagellar attachment zone protein, putative (FAZ1)         | 0,0922  | 0,3098 |
| TcCLB.506227.50  | hypothetical protein, conserved                            | 0,09217 | 0,5159 |
| TcCLB.508515.60  | hypothetical protein, conserved                            | 0,09217 | 0,5421 |
| TcCLB.503847.40  | hypothetical protein, conserved                            | 0,09216 | 0,4635 |
| TcCLB.416883.18  | proteasome alpha 2 subunit, putative                       | 0,0919  | 0,4666 |
| TcCLB.509967.7   | hypothetical protein, conserved                            | 0,09174 | 0,6852 |
| TcCLB.510533.210 | hypothetical protein, conserved (pseudogene)               | 0,09173 | 0,5124 |

|                   |                                                           |         |        |
|-------------------|-----------------------------------------------------------|---------|--------|
| TcCLB.424383.9    | trans-sialidase (pseudogene), putative                    | 0,09168 | 0,7107 |
| TcCLB.506885.350  | proteasome alpha 1 subunit, putative                      | 0,09157 | 0,4058 |
| TcCLB.419417.4    | ADP-ribosylation factor, putative (fragment)              | 0,09157 | 0,4489 |
| TcCLB.511823.50   | palmitoyl acyltransferase 11, putative                    | 0,09147 | 0,4647 |
| TcCLB.506289.70   | hypothetical protein, conserved                           | 0,09127 | 0,3503 |
| TcCLB.510421.150  | protein kinase, putative                                  | 0,09125 | 0,2967 |
| TcCLB.510329.350  | hypothetical protein, conserved                           | 0,09111 | 0,4431 |
| TcCLB.510145.59   | exonuclease, putative                                     | 0,09095 | 0,4849 |
| TcCLB.508815.4    | RNA polymerase I, putative                                | 0,09095 | 0,7207 |
| TcCLB.511501.50   | GTPase activating protein, putative                       | 0,09061 | 0,4313 |
| TcCLB.506717.219  | GMP synthase (pseudogene), putative                       | 0,09059 | 0,516  |
| TcCLB.511277.580  | RNA-binding protein 29, putative (RBP29)                  | 0,09053 | 0,3358 |
| TcCLB.506181.130  | hypothetical protein                                      | 0,09052 | 0,571  |
| TcCLB.503987.70   | ribosome biogenesis protein TSR3, putative (tsr3)         | 0,09038 | 0,5955 |
| TcCLB.452699.5    | trans-sialidase (pseudogene), putative                    | 0,09027 | 0,8279 |
| TcCLB.506885.70   | polyadenylate-binding protein 1, putative                 | 0,0902  | 0,4522 |
| TcCLB.511277.410  | hypothetical protein, conserved                           | 0,09003 | 0,4228 |
| TcCLB.509049.51   | hypothetical protein, conserved                           | 0,08991 | 0,571  |
| TcCLB.506211.10   | lipoic acid synthetase, mitochondrial precursor, putative | 0,08982 | 0,5033 |
| TcCLB.508601.90   | Small Surface Antigen (LDK)                               | 0,08966 | 0,4438 |
| TcCLB.504241.57   | retrotransposon hot spot protein (RHS, pseudogene), puta  | 0,08965 | 0,7989 |
| TcCLB.511735.70   | hypothetical protein, conserved                           | 0,08961 | 0,4891 |
| TcCLB.508153.1060 | hypothetical protein, conserved                           | 0,08961 | 0,669  |
| TcCLB.511535.39   | hypothetical protein, conserved                           | 0,08951 | 0,6952 |
| TcCLB.507599.10   | Ribosome biogenesis protein Tsr3, putative (fragment)     | 0,08948 | 0,728  |
| TcCLB.511409.60   | hypothetical protein, conserved                           | 0,08946 | 0,5457 |
| TcCLB.511751.150  | hypothetical protein, conserved                           | 0,08938 | 0,5667 |
| TcCLB.510941.10   | hypothetical protein, conserved                           | 0,08937 | 0,4657 |
| TcCLB.504099.30   | hypothetical protein, conserved (pseudogene)              | 0,08936 | 0,6229 |
| TcCLB.508179.30   | hypothetical protein, conserved                           | 0,08914 | 0,5265 |
| TcCLB.504131.40   | hypothetical protein, conserved                           | 0,08892 | 0,4266 |
| TcCLB.506963.90   | calmodulin, putative                                      | 0,08892 | 0,4602 |
| TcCLB.506857.80   | kinesin, putative                                         | 0,08882 | 0,3983 |
| TcCLB.506839.60   | tyrosine specific protein phosphatase, putative           | 0,08875 | 0,4168 |
| TcCLB.503929.5    | hypothetical protein, conserved                           | 0,08859 | 0,6577 |
| TcCLB.503667.10   | trans-sialidase, putative                                 | 0,08852 | 0,7031 |
| TcCLB.506443.50   | hypothetical protein, conserved                           | 0,08826 | 0,4534 |
| TcCLB.510719.220  | hypothetical protein                                      | 0,08826 | 0,5494 |
| TcCLB.509099.110  | hypothetical protein, conserved                           | 0,08808 | 0,7059 |
| TcCLB.511235.10   | hypothetical protein, conserved (pseudogene)              | 0,08795 | 0,7852 |
| TcCLB.507735.20   | hypothetical protein, conserved                           | 0,08791 | 0,3457 |
| TcCLB.506401.230  | hypothetical protein, conserved                           | 0,08782 | 0,3839 |
| TcCLB.415187.10   | hypothetical protein, conserved                           | 0,08781 | 0,7371 |
| TcCLB.506287.180  | hypothetical protein, conserved                           | 0,08766 | 0,488  |
| TcCLB.509803.40   | 5-oxoprolinase, putative                                  | 0,08764 | 0,5082 |

|                  |                                                             |         |        |
|------------------|-------------------------------------------------------------|---------|--------|
| TcCLB.511725.270 | hypothetical protein, conserved                             | 0,0876  | 0,3345 |
| TcCLB.507953.110 | retrotransposon hot spot protein (RHS, pseudogene), puta    | 0,0876  | 0,8383 |
| TcCLB.508781.90  | hypothetical protein, conserved                             | 0,08737 | 0,6048 |
| TcCLB.503635.80  | hypothetical protein, conserved                             | 0,0873  | 0,4837 |
| TcCLB.509595.44  | hypothetical protein, conserved                             | 0,08706 | 0,6165 |
| TcCLB.509647.50  | hypothetical protein, conserved                             | 0,087   | 0,2975 |
| TcCLB.506529.90  | puromycin-sensitive aminopeptidase-like protein, putative   | 0,087   | 0,5294 |
| TcCLB.509067.60  | Tetratricopeptide-like helical domain containing protein (I | 0,08691 | 0,189  |
| TcCLB.510235.6   | hypothetical protein                                        | 0,08685 | 0,753  |
| TcCLB.503889.20  | mucin TcMUC (pseudogene), putative                          | 0,0867  | 0,5636 |
| TcCLB.511587.10  | hypothetical protein                                        | 0,08669 | 0,7989 |
| TcCLB.511901.10  | Trypanosome basal body component protein (TBBC)             | 0,08658 | 0,5943 |
| TcCLB.509053.90  | hypothetical protein, conserved                             | 0,0865  | 0,5412 |
| TcCLB.506363.50  | hypothetical protein, conserved                             | 0,08645 | 0,3509 |
| TcCLB.510053.50  | vesicle transport v-SNARE protein, putative                 | 0,08642 | 0,6505 |
| TcCLB.505987.30  | hypothetical protein, conserved                             | 0,08621 | 0,4735 |
| TcCLB.509757.20  | leucine carboxyl methyltransferase, putative                | 0,08609 | 0,5215 |
| TcCLB.510663.64  | mitochondrial carrier protein, putative                     | 0,08597 | 0,6119 |
| TcCLB.506829.60  | hypothetical protein, conserved                             | 0,08593 | 0,5228 |
| TcCLB.506989.240 | hypothetical protein, conserved (pseudogene)                | 0,08591 | 0,3215 |
| TcCLB.511503.9   | hypothetical protein, conserved (pseudogene)                | 0,08584 | 0,5691 |
| TcCLB.511907.270 | ubiquitin-conjugating enzyme E2, putative                   | 0,08574 | 0,4429 |
| TcCLB.511349.110 | retrotransposon hot spot protein (RHS, pseudogene), puta    | 0,08571 | 0,7458 |
| TcCLB.508139.110 | hypothetical protein                                        | 0,08566 | 0,7892 |
| TcCLB.509925.50  | retrotransposon hot spot protein (RHS, pseudogene), puta    | 0,08564 | 0,6516 |
| TcCLB.503757.30  | hypothetical protein, conserved                             | 0,08546 | 0,6097 |
| TcCLB.510575.170 | hypothetical protein, conserved                             | 0,08536 | 0,5011 |
| TcCLB.510253.20  | hypothetical protein, conserved                             | 0,08535 | 0,3517 |
| TcCLB.507519.80  | eukaryotic peptide chain release factor subunit 1, putative | 0,08535 | 0,4952 |
| TcCLB.432787.10  | mitochondrial RNA binding complex 1 subunit, putative (f    | 0,08523 | 0,5906 |
| TcCLB.506709.20  | hypothetical protein, conserved                             | 0,08494 | 0,3975 |
| TcCLB.508207.194 | hypothetical protein, conserved                             | 0,08467 | 0,4384 |
| TcCLB.506817.40  | hypothetical protein, conserved                             | 0,08466 | 0,4236 |
| TcCLB.509857.20  | hypothetical protein, conserved                             | 0,08453 | 0,5129 |
| TcCLB.508265.80  | hypothetical protein                                        | 0,08442 | 0,5066 |
| TcCLB.505937.70  | trans-sialidase (pseudogene), putative                      | 0,08416 | 0,701  |
| TcCLB.510359.150 | ATP-dependent helicase, putative                            | 0,08415 | 0,4025 |
| TcCLB.508593.80  | hypothetical protein, conserved                             | 0,08406 | 0,4423 |
| TcCLB.510755.70  | hypothetical protein, conserved                             | 0,08391 | 0,5295 |
| TcCLB.507821.130 | trans-sialidase, Group II, putative                         | 0,08379 | 0,7177 |
| TcCLB.511473.6   | ATP-dependent DEAD/H RNA helicase (pseudogene), puta        | 0,08378 | 0,7873 |
| TcCLB.511859.70  | hypothetical protein, conserved                             | 0,08369 | 0,5684 |
| TcCLB.511517.150 | hypothetical protein, conserved                             | 0,08366 | 0,6125 |
| TcCLB.508693.20  | DNA topoisomerase IB, large subunit                         | 0,08365 | 0,4762 |
| TcCLB.504769.140 | trans-sialidase, Group VIII, putative                       | 0,08349 | 0,7809 |

|                  |                                                          |         |        |
|------------------|----------------------------------------------------------|---------|--------|
| TcCLB.507611.389 | hypothetical protein, conserved                          | 0,08341 | 0,704  |
| TcCLB.506147.210 | hypothetical protein, conserved                          | 0,08339 | 0,5871 |
| TcCLB.509049.40  | hypothetical protein, conserved                          | 0,08333 | 0,5572 |
| TcCLB.504867.60  | hypothetical protein, conserved                          | 0,08329 | 0,4655 |
| TcCLB.509033.109 | hypothetical protein, conserved                          | 0,08328 | 0,6791 |
| TcCLB.504153.110 | hypothetical protein, conserved                          | 0,08324 | 0,4727 |
| TcCLB.507775.40  | hypothetical protein, conserved                          | 0,08323 | 0,6093 |
| TcCLB.510483.320 | retrotransposon hot spot protein (RHS, pseudogene), puta | 0,08322 | 0,642  |
| TcCLB.508269.60  | exosome-associated protein 4, putative (EAP4)            | 0,08308 | 0,6554 |
| TcCLB.504103.30  | myosin heavy chain, putative                             | 0,08297 | 0,4916 |
| TcCLB.511217.120 | peptidyl-prolyl cis-trans isomerase, putative            | 0,08297 | 0,5716 |
| TcCLB.506303.150 | hypothetical protein, conserved                          | 0,0825  | 0,4761 |
| TcCLB.510773.60  | hypothetical protein                                     | 0,08246 | 0,7706 |
| TcCLB.503899.100 | hypothetical protein                                     | 0,08238 | 0,5106 |
| TcCLB.509597.10  | hypothetical protein, conserved                          | 0,08218 | 0,4374 |
| TcCLB.509213.150 | hypothetical protein, conserved                          | 0,08207 | 0,5439 |
| TcCLB.503453.90  | hypothetical protein, conserved                          | 0,08192 | 0,4707 |
| TcCLB.506195.60  | hypothetical protein, conserved                          | 0,08192 | 0,5424 |
| TcCLB.508153.960 | hypothetical protein, conserved                          | 0,08186 | 0,5064 |
| TcCLB.506775.130 | hypothetical protein, conserved                          | 0,08185 | 0,4721 |
| TcCLB.503945.10  | eukaryotic translation initiation factor 1A, putative    | 0,08182 | 0,5443 |
| TcCLB.510647.40  | syntaxin, putative                                       | 0,08176 | 0,504  |
| TcCLB.510243.110 | hypothetical protein, conserved                          | 0,08175 | 0,5563 |
| TcCLB.508347.90  | hypothetical protein, conserved                          | 0,08172 | 0,4034 |
| TcCLB.511867.100 | hypothetical protein, conserved                          | 0,08162 | 0,5032 |
| TcCLB.511867.170 | hypothetical protein, conserved                          | 0,08152 | 0,4427 |
| TcCLB.508775.70  | dispersed gene family protein 1 (DGF-1), putative        | 0,08142 | 0,8368 |
| TcCLB.510181.120 | hypothetical protein, conserved                          | 0,08133 | 0,5201 |
| TcCLB.508451.5   | mucin-associated surface protein (MASP, pseudogene), pi  | 0,08133 | 0,6712 |
| TcCLB.503983.29  | hypothetical protein, conserved                          | 0,08125 | 0,6621 |
| TcCLB.511391.220 | hypothetical protein, conserved                          | 0,08124 | 0,2474 |
| TcCLB.508277.230 | nucleolar RNA binding protein, putative                  | 0,08122 | 0,4372 |
| TcCLB.508915.9   | hypothetical protein, conserved                          | 0,081   | 0,5622 |
| TcCLB.509913.30  | hypothetical protein, conserved                          | 0,08098 | 0,3988 |
| TcCLB.503521.20  | hypothetical protein, conserved                          | 0,08095 | 0,4835 |
| TcCLB.510311.160 | hypothetical protein, conserved                          | 0,08081 | 0,542  |
| TcCLB.509683.70  | dynein light chain Tctex-type, putative                  | 0,08069 | 0,5395 |
| TcCLB.508405.50  | hypothetical protein, conserved                          | 0,08056 | 0,5801 |
| TcCLB.511183.130 | hypothetical protein, conserved (pseudogene)             | 0,08048 | 0,8401 |
| TcCLB.506415.30  | hypothetical protein, conserved                          | 0,08042 | 0,6156 |
| TcCLB.511293.20  | hypothetical protein, conserved                          | 0,08034 | 0,379  |
| TcCLB.510249.14  | hypothetical protein, conserved                          | 0,08031 | 0,8886 |
| TcCLB.507755.10  | hypothetical protein                                     | 0,07976 | 0,5344 |
| TcCLB.509769.4   | Meckel syndrome type 1 protein, putative (fragment) (mk  | 0,07963 | 0,5147 |
| TcCLB.510305.40  | hypothetical protein, conserved                          | 0,07957 | 0,5106 |

|                  |                                                           |         |        |
|------------------|-----------------------------------------------------------|---------|--------|
| TcCLB.510691.70  | hypothetical protein, conserved                           | 0,07938 | 0,6547 |
| TcCLB.509541.4   | paraflagellar rod component par4, putative                | 0,07937 | 0,6611 |
| TcCLB.506871.150 | hypothetical protein, conserved                           | 0,07935 | 0,4762 |
| TcCLB.508153.610 | Putative intraflagellar transport protein C3 (PIFTC3)     | 0,07922 | 0,5069 |
| TcCLB.506743.10  | hypothetical protein                                      | 0,07918 | 0,6799 |
| TcCLB.510901.40  | hypothetical protein, conserved                           | 0,07912 | 0,66   |
| TcCLB.507621.10  | retrotransposon hot spot protein (RHS, pseudogene), puta  | 0,07907 | 0,7878 |
| TcCLB.507093.120 | hypothetical protein, conserved                           | 0,07899 | 0,5806 |
| TcCLB.506313.10  | retrotransposon hot spot (RHS) protein, putative (fragmer | 0,07897 | 0,4889 |
| TcCLB.509471.20  | Present in the outer mitochondrial membrane proteome      | 0,07896 | 0,3665 |
| TcCLB.509597.4   | hypothetical protein, conserved                           | 0,07896 | 0,5058 |
| TcCLB.506885.400 | 40 kDa cyclophilin, putative (CYP40)                      | 0,07894 | 0,5123 |
| TcCLB.510291.7   | TPR-repeat-containing chaperone protein DNAJ, putative (  | 0,07892 | 0,5592 |
| TcCLB.511121.11  | retrotransposon hot spot (RHS) protein, putative (fragmer | 0,07891 | 0,619  |
| TcCLB.508153.350 | hypothetical protein, conserved                           | 0,07888 | 0,6153 |
| TcCLB.509573.40  | hypothetical protein, conserved                           | 0,07883 | 0,7429 |
| TcCLB.507035.75  | retrotransposon hot spot protein (RHS, pseudogene), puta  | 0,07866 | 0,5649 |
| TcCLB.505965.86  | tRNA pseudouridine synthase (pseudogene), putative        | 0,07865 | 0,496  |
| TcCLB.506913.20  | protein kinase, putative (fragment)                       | 0,07856 | 0,7351 |
| TcCLB.503435.14  | hypothetical protein                                      | 0,07854 | 0,5148 |
| TcCLB.504001.3   | flagellar radial spoke component, putative (fragment)     | 0,07849 | 0,6483 |
| TcCLB.504203.60  | TPR-repeat-containing chaperone protein DNAJ, putative (  | 0,07811 | 0,5032 |
| TcCLB.508197.20  | ADP-ribosylation factor, putative                         | 0,07801 | 0,654  |
| TcCLB.509829.9   | retrotransposon hot spot (RHS) protein, putative (fragmer | 0,07794 | 0,7128 |
| TcCLB.511245.50  | hypothetical protein, conserved                           | 0,07788 | 0,4035 |
| TcCLB.510599.40  | hypothetical protein, conserved                           | 0,07786 | 0,4486 |
| TcCLB.506975.34  | aminoacylase, putative                                    | 0,07773 | 0,7237 |
| TcCLB.510963.5   | hypothetical protein, conserved (fragment)                | 0,07771 | 0,699  |
| TcCLB.511807.50  | hypothetical protein, conserved                           | 0,07764 | 0,3476 |
| TcCLB.509769.36  | palmitoyl acyltransferase 12, putative                    | 0,07746 | 0,5369 |
| TcCLB.506739.180 | hypothetical protein, conserved                           | 0,07736 | 0,423  |
| TcCLB.504167.14  | hypothetical protein                                      | 0,07716 | 0,5997 |
| TcCLB.511859.161 | hypothetical protein                                      | 0,07712 | 0,6799 |
| TcCLB.508373.29  | orotidine-5-phosphate decarboxylase/orotate phosphoribc   | 0,07691 | 0,5686 |
| TcCLB.506851.10  | NIMA-related kinase, putative                             | 0,07679 | 0,3788 |
| TcCLB.506959.30  | ATP-dependent DEAD/H RNA helicase, putative               | 0,07677 | 0,4309 |
| TcCLB.510533.10  | Cytoplasmic dynein 1 heavy chain (DYNC1H1), putative      | 0,07671 | 0,4652 |
| TcCLB.506577.20  | hypothetical protein                                      | 0,07665 | 0,4741 |
| TcCLB.506287.100 | hypothetical protein, conserved                           | 0,07662 | 0,5485 |
| TcCLB.506133.75  | mucin TcMUCII (pseudogene), putative                      | 0,0766  | 0,7739 |
| TcCLB.504253.20  | hypothetical protein, conserved                           | 0,07648 | 0,539  |
| TcCLB.506629.80  | vesicular transport protein (CDC48 homologue), putative   | 0,07638 | 0,3209 |
| TcCLB.507883.10  | glucose-6-phosphate 1-dehydrogenase (pseudogene), puti    | 0,07627 | 0,7017 |
| TcCLB.507035.30  | dispersed gene family protein 1 (DGF-1), putative         | 0,07624 | 0,6303 |
| TcCLB.506961.90  | retrotransposon hot spot (RHS) protein, putative          | 0,07615 | 0,517  |

|                  |                                                           |         |        |
|------------------|-----------------------------------------------------------|---------|--------|
| TcCLB.511193.9   | dispersed gene family protein 1 (DGF-1, pseudogene), put  | 0,07605 | 0,7147 |
| TcCLB.503823.100 | hypothetical protein, conserved                           | 0,07604 | 0,5734 |
| TcCLB.511705.5   | trans-sialidase (pseudogene), putative                    | 0,07599 | 0,8544 |
| TcCLB.509721.30  | intraflagellar transport protein 122B, putative (IFT122B) | 0,07593 | 0,4245 |
| TcCLB.506727.4   | hypothetical protein, conserved                           | 0,0759  | 0,7421 |
| TcCLB.508355.330 | hypothetical protein, conserved                           | 0,07585 | 0,4054 |
| TcCLB.511361.30  | hypothetical protein, conserved                           | 0,07585 | 0,6414 |
| TcCLB.510055.30  | hypothetical protein, conserved                           | 0,07585 | 0,7841 |
| TcCLB.505155.10  | retrotransposon hot spot protein (RHS, pseudogene), puta  | 0,07573 | 0,6479 |
| TcCLB.509827.10  | hypothetical protein, conserved                           | 0,0757  | 0,5295 |
| TcCLB.509109.90  | hypothetical protein, conserved                           | 0,07561 | 0,6756 |
| TcCLB.509601.30  | hypothetical protein                                      | 0,07555 | 0,5138 |
| TcCLB.510387.15  | syntaxin binding protein (pseudogene), putative           | 0,07551 | 0,8293 |
| TcCLB.506203.10  | nucleoside transporter 1, putative                        | 0,07549 | 0,5694 |
| TcCLB.510799.30  | hypothetical protein, conserved                           | 0,07545 | 0,5281 |
| TcCLB.506963.60  | hypothetical protein, conserved (pseudogene)              | 0,07541 | 0,6296 |
| TcCLB.511013.3   | ATP-dependent DEAD/H RNA helicase (pseudogene), puta      | 0,07541 | 0,85   |
| TcCLB.510689.40  | phosphatidylinositol 3-kinase (tor2), putative (TOR2)     | 0,07535 | 0,4086 |
| TcCLB.511287.90  | ribosome biogenesis protein, putative                     | 0,07533 | 0,4668 |
| TcCLB.510339.14  | hypothetical protein, conserved                           | 0,07532 | 0,539  |
| TcCLB.504427.40  | hypothetical protein, conserved                           | 0,0752  | 0,6689 |
| TcCLB.508231.30  | target of rapamycin (TOR) kinase 1, putative (TOR1)       | 0,07515 | 0,2794 |
| TcCLB.511263.20  | hypothetical protein, conserved                           | 0,07509 | 0,3927 |
| TcCLB.504055.130 | trans-sialidase (pseudogene), putative                    | 0,07508 | 0,6446 |
| TcCLB.508895.70  | membrane protein, putative                                | 0,07497 | 0,6458 |
| TcCLB.508409.260 | hypothetical protein, conserved                           | 0,07489 | 0,4334 |
| TcCLB.510089.64  | hypothetical protein, conserved                           | 0,07489 | 0,6026 |
| TcCLB.510661.190 | protein kinase, putative                                  | 0,07481 | 0,7681 |
| TcCLB.511871.80  | frataxin-like, mitochondrial precursor, putative          | 0,0747  | 0,6968 |
| TcCLB.511881.14  | RNA polymerase subunit RPB10, putative (RPB10)            | 0,07469 | 0,6683 |
| TcCLB.505965.70  | helicase (pseudogene), putative                           | 0,07466 | 0,495  |
| TcCLB.506885.330 | hypothetical protein, conserved                           | 0,07463 | 0,4659 |
| TcCLB.508185.19  | ubiquitin hydrolase, putative (fragment)                  | 0,07463 | 0,8085 |
| TcCLB.511367.230 | NADPH:adrenodoxin oxidoreductase, mitochondrial, putati   | 0,07461 | 0,478  |
| TcCLB.506607.10  | hypothetical protein, conserved                           | 0,07457 | 0,6415 |
| TcCLB.510323.90  | hypothetical protein, conserved                           | 0,07448 | 0,5176 |
| TcCLB.503901.9   | hypothetical protein, conserved (pseudogene)              | 0,07442 | 0,6182 |
| TcCLB.507507.49  | hypothetical protein, conserved                           | 0,07436 | 0,7831 |
| TcCLB.506743.170 | hypothetical protein, conserved                           | 0,07426 | 0,5747 |
| TcCLB.509127.110 | hypothetical protein, conserved                           | 0,07424 | 0,5538 |
| TcCLB.510533.190 | hypothetical protein, conserved                           | 0,0741  | 0,6234 |
| TcCLB.507235.10  | dispersed gene family protein 1 (DGF-1), putative         | 0,07409 | 0,8425 |
| TcCLB.510303.119 | hypothetical protein, conserved                           | 0,07408 | 0,5965 |
| TcCLB.510165.110 | retrotransposon hot spot (RHS) protein, putative          | 0,07406 | 0,6921 |
| TcCLB.511537.16  | hypothetical protein, conserved                           | 0,07402 | 0,5573 |



|                  |                                                          |         |        |
|------------------|----------------------------------------------------------|---------|--------|
| TcCLB.510359.69  | mitochondrial carrier protein, putative                  | 0,074   | 0,5855 |
| TcCLB.509471.50  | hypothetical protein, conserved                          | 0,07389 | 0,5086 |
| TcCLB.442297.10  | ARP2/3 complex 16kDa subunit, putative                   | 0,07385 | 0,669  |
| TcCLB.511385.120 | hypothetical protein, conserved                          | 0,07384 | 0,7712 |
| TcCLB.508773.9   | dispersed gene family protein 1 (DGF-1), putative        | 0,07383 | 0,8822 |
| TcCLB.507025.10  | hypothetical protein, conserved                          | 0,07369 | 0,4635 |
| TcCLB.511229.60  | hypothetical protein, conserved                          | 0,07363 | 0,7714 |
| TcCLB.509643.110 | hypothetical protein, conserved                          | 0,0736  | 0,5509 |
| TcCLB.507011.190 | hypothetical protein, conserved                          | 0,07349 | 0,699  |
| TcCLB.509733.160 | amino acid transporter, putative                         | 0,07348 | 0,6098 |
| TcCLB.511013.6   | N-acetyltransferase complex ARD1 subunit (pseudogene),   | 0,07321 | 0,8672 |
| TcCLB.508991.10  | retrotransposon hot spot protein (RHS, pseudogene), puta | 0,07317 | 0,5859 |
| TcCLB.505987.60  | hypothetical protein                                     | 0,07309 | 0,3807 |
| TcCLB.509031.10  | surface protease GP63 (pseudogene), putative             | 0,07308 | 0,7076 |
| TcCLB.507723.60  | hypothetical protein                                     | 0,073   | 0,6523 |
| TcCLB.511151.50  | phosphoadenosine phosphosulfate reductase-like protein,  | 0,07279 | 0,5108 |
| TcCLB.507007.30  | hypothetical protein                                     | 0,07267 | 0,6255 |
| TcCLB.511319.10  | hypothetical protein, conserved                          | 0,07266 | 0,4571 |
| TcCLB.508193.30  | dispersed gene family protein 1 (DGF-1, pseudogene), put | 0,07261 | 0,7712 |
| TcCLB.507105.10  | beta prime cop protein, putative                         | 0,07258 | 0,4081 |
| TcCLB.509885.30  | SPFH domain / Band 7 family protein, putative            | 0,07256 | 0,5729 |
| TcCLB.506821.80  | hypothetical protein, conserved                          | 0,07251 | 0,7128 |
| TcCLB.509799.70  | hypothetical protein, conserved                          | 0,07246 | 0,5145 |
| TcCLB.507511.20  | hypothetical protein, conserved                          | 0,0724  | 0,5048 |
| TcCLB.510945.20  | hypothetical protein, conserved                          | 0,07235 | 0,5563 |
| TcCLB.511417.60  | hypothetical protein, conserved                          | 0,07206 | 0,5851 |
| TcCLB.504215.50  | hypothetical protein, conserved                          | 0,07203 | 0,4741 |
| TcCLB.507851.10  | hypothetical protein, conserved                          | 0,07201 | 0,5037 |
| TcCLB.509207.160 | proteasome regulatory ATPase subunit 1, putative         | 0,07198 | 0,4208 |
| TcCLB.508831.20  | oligomeric golgi complex component 8, putative           | 0,07189 | 0,5658 |
| TcCLB.508257.204 | hypothetical protein, conserved                          | 0,07173 | 0,5518 |
| TcCLB.504137.110 | hypothetical protein, conserved                          | 0,07169 | 0,481  |
| TcCLB.507039.30  | retrotransposon hot spot protein (RHS, pseudogene), puta | 0,07141 | 0,5464 |
| TcCLB.511421.180 | hypothetical protein, conserved                          | 0,07122 | 0,6319 |
| TcCLB.510089.130 | protein kinase, putative                                 | 0,0711  | 0,4798 |
| TcCLB.503689.20  | hypothetical protein, conserved                          | 0,07101 | 0,7702 |
| TcCLB.507711.170 | hypothetical protein, conserved                          | 0,07089 | 0,5784 |
| TcCLB.508153.250 | hypothetical protein                                     | 0,07075 | 0,6878 |
| TcCLB.504179.80  | hypothetical protein, conserved                          | 0,07074 | 0,5363 |
| TcCLB.506777.60  | NGG1 interacting factor 3, putative                      | 0,07071 | 0,654  |
| TcCLB.510889.30  | kinase, putative                                         | 0,07055 | 0,5662 |
| TcCLB.481729.10  | hypothetical protein, conserved                          | 0,07053 | 0,6228 |
| TcCLB.508153.80  | DNA replication complex GINS protein SLD5, putative      | 0,07034 | 0,6509 |
| TcCLB.506907.14  | hypothetical protein, conserved                          | 0,07018 | 0,5854 |
| TcCLB.509455.90  | Putative intraflagellar transport protein A1 (PIFTA1)    | 0,06994 | 0,4914 |

|                  |                                                           |         |        |
|------------------|-----------------------------------------------------------|---------|--------|
| TcCLB.506811.150 | hypothetical protein, conserved                           | 0,06989 | 0,5591 |
| TcCLB.506223.84  | hypothetical protein, conserved                           | 0,06983 | 0,6194 |
| TcCLB.507521.115 | hypothetical protein, conserved                           | 0,06972 | 0,7059 |
| TcCLB.511169.10  | hypothetical protein, conserved                           | 0,06937 | 0,6716 |
| TcCLB.507895.140 | hypothetical protein                                      | 0,0693  | 0,5226 |
| TcCLB.508723.100 | rab-like GTPase activating protein, putative              | 0,06927 | 0,5656 |
| TcCLB.509049.20  | hypothetical protein, conserved                           | 0,06927 | 0,5846 |
| TcCLB.504035.90  | translation initiation factor IF-2, putative              | 0,0692  | 0,5136 |
| TcCLB.509979.30  | hypothetical protein, conserved                           | 0,06911 | 0,57   |
| TcCLB.504247.34  | Transcription elongation factor 1 domain-containing prote | 0,06897 | 0,6405 |
| TcCLB.507641.120 | ATP-dependent DEAD/H RNA helicase, putative               | 0,06896 | 0,4902 |
| TcCLB.510307.352 | retrotransposon hot spot protein (RHS, pseudogene), puta  | 0,06893 | 0,689  |
| TcCLB.511911.21  | hypothetical protein, conserved                           | 0,06893 | 0,8309 |
| TcCLB.507527.4   | dolichyl-P-Man:GDP-Man5GlcNAc2-PP-dolichyl alpha-1,2-     | 0,06892 | 0,7209 |
| TcCLB.505163.30  | hypothetical protein, conserved                           | 0,06868 | 0,545  |
| TcCLB.507507.40  | ubiquitin hydrolase, putative                             | 0,06868 | 0,6919 |
| TcCLB.510155.130 | hypothetical protein, conserved                           | 0,06861 | 0,436  |
| TcCLB.511671.140 | hypothetical protein                                      | 0,06856 | 0,5963 |
| TcCLB.510421.260 | diacylglycerol acyltransferase, putative                  | 0,06852 | 0,6251 |
| TcCLB.506021.10  | retrotransposon hot spot protein (RHS, pseudogene), puta  | 0,06845 | 0,5954 |
| TcCLB.506247.200 | adaptin complex 1 subunit, putative                       | 0,06844 | 0,4309 |
| TcCLB.407477.30  | diphthine synthase, putative                              | 0,06843 | 0,6338 |
| TcCLB.425851.9   | hypothetical protein, conserved                           | 0,06826 | 0,7208 |
| TcCLB.509945.24  | hypothetical protein, conserved                           | 0,06824 | 0,6707 |
| TcCLB.508175.290 | hypothetical protein, conserved                           | 0,06793 | 0,5476 |
| TcCLB.506811.10  | kinesin, putative                                         | 0,0678  | 0,5691 |
| TcCLB.503543.10  | presenilin-like aspartic peptidase, putative              | 0,06777 | 0,5649 |
| TcCLB.506695.20  | hypothetical protein, conserved                           | 0,0675  | 0,6612 |
| TcCLB.509765.20  | retrotransposon hot spot protein (RHS, pseudogene), puta  | 0,06739 | 0,784  |
| TcCLB.511665.100 | retrotransposon hot spot protein (RHS, pseudogene), puta  | 0,06735 | 0,711  |
| TcCLB.509253.50  | recombination initiation protein NBS1, putative           | 0,06702 | 0,4977 |
| TcCLB.507709.20  | hypothetical protein                                      | 0,06695 | 0,5396 |
| TcCLB.511907.330 | retrotransposon hot spot (RHS) protein, putative          | 0,0668  | 0,5832 |
| TcCLB.506225.20  | trans-sialidase (pseudogene), putative                    | 0,06654 | 0,7793 |
| TcCLB.506635.20  | ATP-dependent RNA helicase, putative                      | 0,06646 | 0,4887 |
| TcCLB.511467.50  | hypothetical protein, conserved                           | 0,06635 | 0,6946 |
| TcCLB.506671.41  | elongation factor 1-gamma (EF-1-gamma, pseudogene),       | 0,06633 | 0,9074 |
| TcCLB.507483.39  | calmodulin (CALA2)                                        | 0,06626 | 0,7668 |
| TcCLB.509171.40  | hypothetical protein, conserved                           | 0,06609 | 0,5328 |
| TcCLB.511045.50  | hypothetical protein, conserved                           | 0,06607 | 0,7084 |
| TcCLB.508261.25  | trans-sialidase (pseudogene), putative                    | 0,06606 | 0,6159 |
| TcCLB.507459.10  | hypothetical protein, conserved (pseudogene)              | 0,06604 | 0,8326 |
| TcCLB.511745.30  | E3 ubiquitin-protein ligase, putative                     | 0,06602 | 0,5012 |
| TcCLB.509965.134 | hypothetical protein, conserved                           | 0,06602 | 0,7661 |
| TcCLB.508961.79  | 69 kDa paraflagellar rod protein, putative                | 0,06592 | 0,5584 |

|                  |                                                           |         |        |
|------------------|-----------------------------------------------------------|---------|--------|
| TcCLB.503697.130 | hypothetical protein, conserved                           | 0,0659  | 0,5082 |
| TcCLB.508153.400 | serine/threonine-protein kinase, putative                 | 0,06587 | 0,5257 |
| TcCLB.509117.19  | hypothetical protein, conserved                           | 0,06584 | 0,6296 |
| TcCLB.509791.189 | flagellum targeting protein kharon1, putative (fragment)  | 0,06581 | 0,6484 |
| TcCLB.508641.40  | retrotransposon hot spot protein (RHS, pseudogene), puta  | 0,0658  | 0,7969 |
| TcCLB.509791.90  | hypothetical protein, conserved                           | 0,06565 | 0,657  |
| TcCLB.507773.20  | hypothetical protein                                      | 0,06553 | 0,6846 |
| TcCLB.509211.10  | hypothetical protein, conserved                           | 0,06551 | 0,5902 |
| TcCLB.510275.90  | hypothetical protein                                      | 0,06537 | 0,7768 |
| TcCLB.511907.320 | hypothetical protein, conserved                           | 0,06532 | 0,5682 |
| TcCLB.511167.119 | hypothetical protein, conserved (fragment)                | 0,06526 | 0,5348 |
| TcCLB.509067.50  | hypothetical protein, conserved                           | 0,06519 | 0,4921 |
| TcCLB.503879.119 | protein transport protein Sec24C, putative                | 0,06514 | 0,5876 |
| TcCLB.508207.160 | hypothetical protein, conserved                           | 0,0651  | 0,6553 |
| TcCLB.506925.180 | protein kinase, putative                                  | 0,06507 | 0,5782 |
| TcCLB.506869.60  | protein kinase, putative                                  | 0,06504 | 0,5717 |
| TcCLB.510655.130 | hypothetical protein, conserved                           | 0,06494 | 0,7641 |
| TcCLB.506667.170 | hypothetical protein                                      | 0,06491 | 0,867  |
| TcCLB.506113.40  | hypothetical protein, conserved (pseudogene)              | 0,06481 | 0,6408 |
| TcCLB.506825.60  | hypothetical protein, conserved                           | 0,06479 | 0,5047 |
| TcCLB.506393.120 | hypothetical protein, conserved (pseudogene)              | 0,06479 | 0,5922 |
| TcCLB.510531.40  | hypothetical protein, conserved                           | 0,06471 | 0,5358 |
| TcCLB.511911.140 | hypothetical protein, conserved                           | 0,0647  | 0,6872 |
| TcCLB.507893.9   | dispersed gene family protein 1 (DGF-1), putative (fragme | 0,06466 | 0,7827 |
| TcCLB.511513.30  | hypothetical protein, conserved                           | 0,06465 | 0,4793 |
| TcCLB.511523.50  | hypothetical protein, conserved                           | 0,06451 | 0,637  |
| TcCLB.507063.260 | hypothetical protein                                      | 0,06443 | 0,8281 |
| TcCLB.511657.60  | hypothetical protein, conserved                           | 0,06435 | 0,4873 |
| TcCLB.506355.130 | hypothetical protein, conserved                           | 0,06434 | 0,6032 |
| TcCLB.504103.40  | hypothetical protein, conserved                           | 0,06417 | 0,6299 |
| TcCLB.511469.50  | hypothetical protein, conserved                           | 0,06407 | 0,6797 |
| TcCLB.508539.50  | hypothetical protein, conserved                           | 0,06402 | 0,5857 |
| TcCLB.508355.110 | hypothetical protein                                      | 0,06388 | 0,6091 |
| TcCLB.508181.124 | hypothetical protein, conserved                           | 0,06369 | 0,5979 |
| TcCLB.510325.10  | ubiquitin hydrolase, putative                             | 0,06368 | 0,5973 |
| TcCLB.507089.170 | hypothetical protein, conserved                           | 0,06363 | 0,6235 |
| TcCLB.509897.260 | hypothetical protein                                      | 0,0636  | 0,7967 |
| TcCLB.511903.50  | amastin, putative                                         | 0,06348 | 0,6886 |
| TcCLB.506363.159 | separase, putative                                        | 0,06346 | 0,8582 |
| TcCLB.504057.30  | hypothetical protein, conserved                           | 0,06333 | 0,4625 |
| TcCLB.511911.110 | RNA helicase, putative                                    | 0,06329 | 0,6041 |
| TcCLB.506967.65  | mucin TcMUCII (pseudogene), putative                      | 0,06305 | 0,8715 |
| TcCLB.508221.990 | surface protease GP63 (pseudogene), putative              | 0,06298 | 0,8562 |
| TcCLB.511751.120 | aldehyde dehydrogenase family, putative                   | 0,06295 | 0,6676 |
| TcCLB.505987.41  | hypothetical protein, conserved                           | 0,06285 | 0,7259 |

|                  |                                                          |         |        |
|------------------|----------------------------------------------------------|---------|--------|
| TcCLB.504047.60  | protein kinase, putative                                 | 0,06267 | 0,5351 |
| TcCLB.509805.60  | Ras-related protein Rab5A, putative (RAB5A)              | 0,06238 | 0,5174 |
| TcCLB.511731.10  | UV excision repair RAD23-like protein, putative          | 0,06226 | 0,5351 |
| TcCLB.506201.90  | hypothetical protein, conserved                          | 0,06223 | 0,6272 |
| TcCLB.503815.4   | hypothetical protein, conserved                          | 0,06201 | 0,7854 |
| TcCLB.508831.150 | hypothetical protein, conserved                          | 0,06195 | 0,5095 |
| TcCLB.506773.180 | regulator of chromatin condensation, putative            | 0,06192 | 0,6011 |
| TcCLB.511409.10  | PAB1-binding protein , putative                          | 0,06185 | 0,4152 |
| TcCLB.507203.5   | trans-sialidase (pseudogene), putative                   | 0,06181 | 0,6553 |
| TcCLB.506989.60  | phosphate transporter, putative                          | 0,06173 | 0,6588 |
| TcCLB.511355.7   | TFIID-like protein, putative (fragment)                  | 0,06167 | 0,6709 |
| TcCLB.508177.10  | hypothetical protein, conserved                          | 0,06164 | 0,6932 |
| TcCLB.503897.90  | hypothetical protein, conserved                          | 0,06156 | 0,5612 |
| TcCLB.503697.60  | nuclear cap binding complex subunit CBP110, putative (CB | 0,0615  | 0,532  |
| TcCLB.508987.9   | hypothetical protein, conserved                          | 0,06131 | 0,5352 |
| TcCLB.510719.150 | hypothetical protein, conserved                          | 0,06118 | 0,4911 |
| TcCLB.507843.20  | trans-sialidase, putative (pseudogene)                   | 0,06107 | 0,8838 |
| TcCLB.511635.30  | ARP2/3 complex 16kDa subunit, putative                   | 0,061   | 0,7084 |
| TcCLB.510773.100 | Flagellar Member 4 (FLAM4)                               | 0,06094 | 0,581  |
| TcCLB.511479.10  | trans-sialidase (pseudogene), putative                   | 0,06094 | 0,9219 |
| TcCLB.504069.10  | proteasome alpha 2 subunit, putative                     | 0,06093 | 0,6384 |
| TcCLB.508177.81  | surface protease GP63 (pseudogene), putative             | 0,0605  | 0,7169 |
| TcCLB.510275.130 | dispersed gene family protein 1 (DGF-1), putative        | 0,0603  | 0,8094 |
| TcCLB.507601.140 | ATP-dependent RNA helicase, putative                     | 0,06019 | 0,5907 |
| TcCLB.510535.109 | trans-sialidase, putative                                | 0,05993 | 0,7555 |
| TcCLB.511729.20  | hypothetical protein                                     | 0,05954 | 0,6125 |
| TcCLB.509059.40  | hypothetical protein, conserved                          | 0,05942 | 0,5703 |
| TcCLB.508239.49  | dynein regulatory complex subunit, putative              | 0,05942 | 0,7208 |
| TcCLB.508283.25  | hypothetical protein, conserved (pseudogene)             | 0,0594  | 0,8252 |
| TcCLB.509167.120 | S-adenosylmethionine decarboxylase proenzyme, putative   | 0,05933 | 0,572  |
| TcCLB.509179.110 | hypothetical protein, conserved                          | 0,0593  | 0,6274 |
| TcCLB.424123.10  | hypothetical protein, conserved (pseudogene)             | 0,05926 | 0,641  |
| TcCLB.509911.30  | hypothetical protein                                     | 0,05922 | 0,6844 |
| TcCLB.506469.120 | hypothetical protein, conserved                          | 0,05918 | 0,6543 |
| TcCLB.510791.11  | hypothetical protein                                     | 0,05914 | 0,7931 |
| TcCLB.511289.30  | metallo-peptidase, Clan MG, Family M24                   | 0,05909 | 0,4914 |
| TcCLB.510659.194 | hypothetical protein, conserved                          | 0,05906 | 0,6501 |
| TcCLB.507513.130 | hypothetical protein, conserved (pseudogene)             | 0,05894 | 0,5039 |
| TcCLB.503823.60  | hypothetical protein, conserved                          | 0,05894 | 0,636  |
| TcCLB.487739.20  | choline/ethanolamine kinase (pseudogene), putative       | 0,05893 | 0,7349 |
| TcCLB.507023.180 | protein kinase, putative                                 | 0,05889 | 0,6166 |
| TcCLB.511585.210 | hypothetical protein, conserved                          | 0,05889 | 0,6757 |
| TcCLB.507509.60  | hypothetical protein, conserved                          | 0,05852 | 0,6182 |
| TcCLB.505807.29  | hypothetical protein, conserved                          | 0,0585  | 0,8165 |
| TcCLB.506825.50  | hypothetical protein, conserved                          | 0,05848 | 0,5422 |

|                  |                                                           |         |        |
|------------------|-----------------------------------------------------------|---------|--------|
| TcCLB.511277.320 | hypothetical protein, conserved                           | 0,05825 | 0,5399 |
| TcCLB.511893.30  | hypothetical protein, conserved (pseudogene)              | 0,05819 | 0,734  |
| TcCLB.503891.70  | ribonuclease HII, putative                                | 0,05818 | 0,6515 |
| TcCLB.507941.80  | hypothetical protein, conserved                           | 0,058   | 0,7209 |
| TcCLB.503801.50  | hypothetical protein, conserved                           | 0,05784 | 0,632  |
| TcCLB.506933.46  | hypothetical protein, conserved                           | 0,05775 | 0,7313 |
| TcCLB.508347.50  | hypothetical protein, conserved                           | 0,05759 | 0,7496 |
| TcCLB.506999.70  | chaperone DNAJ protein, putative                          | 0,05758 | 0,6    |
| TcCLB.507093.200 | hypothetical protein, conserved                           | 0,05747 | 0,5675 |
| TcCLB.507993.70  | hypothetical protein, conserved                           | 0,05745 | 0,5924 |
| TcCLB.507649.60  | hypothetical protein, conserved                           | 0,05741 | 0,6636 |
| TcCLB.507669.130 | hypothetical protein, conserved                           | 0,05732 | 0,6921 |
| TcCLB.508141.20  | hypothetical protein, conserved                           | 0,05708 | 0,6195 |
| TcCLB.511249.30  | hypothetical protein, conserved                           | 0,05706 | 0,5691 |
| TcCLB.507159.90  | DNA-directed RNA polymerase III subunit, putative         | 0,05698 | 0,6665 |
| TcCLB.507001.70  | syntaxin, putative                                        | 0,05688 | 0,6743 |
| TcCLB.509579.34  | ATP-dependent DEAD/H RNA helicase (pseudogene), puta      | 0,05683 | 0,8658 |
| TcCLB.506347.10  | dynein heavy chain (pseudogene), putative                 | 0,05678 | 0,4974 |
| TcCLB.506941.80  | tubulin-tyrosine ligase-like protein, putative            | 0,05666 | 0,6597 |
| TcCLB.511269.60  | Vacuolar protein sorting-associated protein 16 homolog, ꝑ | 0,05665 | 0,7104 |
| TcCLB.508265.40  | hypothetical protein, conserved                           | 0,0565  | 0,6111 |
| TcCLB.503627.9   | hypothetical protein, conserved (fragment)                | 0,0565  | 0,6518 |
| TcCLB.504109.80  | Intraflagellar transport protein 144, putative (PIFTF6)   | 0,05649 | 0,6099 |
| TcCLB.511827.60  | CCR4 associated factor, putative                          | 0,05648 | 0,5541 |
| TcCLB.509777.80  | hypothetical protein, conserved                           | 0,05635 | 0,6868 |
| TcCLB.510755.110 | hypothetical protein, conserved                           | 0,05633 | 0,7374 |
| TcCLB.509381.29  | hypothetical protein, conserved                           | 0,05624 | 0,618  |
| TcCLB.507519.50  | hypothetical protein, conserved                           | 0,05622 | 0,7209 |
| TcCLB.509799.20  | hypothetical protein, conserved                           | 0,05595 | 0,637  |
| TcCLB.508207.70  | Adenine phosphoribosyltransferase, putative               | 0,05595 | 0,6728 |
| TcCLB.506635.104 | hypothetical protein                                      | 0,05595 | 0,7681 |
| TcCLB.503939.80  | prolyl-tRNA synthetase, putative                          | 0,05589 | 0,5069 |
| TcCLB.507623.60  | hypothetical protein, conserved                           | 0,05585 | 0,5575 |
| TcCLB.510431.220 | ribosome assembly protein RRB1, putative                  | 0,05578 | 0,7259 |
| TcCLB.503865.40  | hypothetical protein, conserved                           | 0,05576 | 0,7119 |
| TcCLB.504243.20  | hypothetical protein, conserved                           | 0,05576 | 0,7349 |
| TcCLB.511907.89  | hypothetical protein, conserved                           | 0,05571 | 0,8005 |
| TcCLB.503587.47  | hypothetical protein                                      | 0,05571 | 0,8714 |
| TcCLB.506933.43  | hypothetical protein, conserved                           | 0,05565 | 0,6641 |
| TcCLB.507099.80  | ABC transporter, putative                                 | 0,05552 | 0,5694 |
| TcCLB.511907.30  | hypothetical protein, conserved                           | 0,05547 | 0,5887 |
| TcCLB.503885.20  | hypothetical protein, conserved                           | 0,05546 | 0,575  |
| TcCLB.509965.90  | hypothetical protein, conserved                           | 0,05534 | 0,5705 |
| TcCLB.508637.66  | hypothetical protein, conserved                           | 0,05534 | 0,675  |
| TcCLB.506223.50  | hypothetical protein, conserved                           | 0,05528 | 0,6859 |

|                  |                                                          |         |        |
|------------------|----------------------------------------------------------|---------|--------|
| TcCLB.511803.80  | hypothetical protein, conserved (fragment)               | 0,05512 | 0,8817 |
| TcCLB.506337.20  | hypothetical protein, conserved                          | 0,05494 | 0,6563 |
| TcCLB.508387.100 | ubiquitin-conjugating enzyme E2, putative                | 0,05478 | 0,6904 |
| TcCLB.508637.79  | DNA polymerase eta, putative                             | 0,05476 | 0,6575 |
| TcCLB.511459.20  | hypothetical protein, conserved                          | 0,05464 | 0,6427 |
| TcCLB.506287.90  | hypothetical protein, conserved                          | 0,05463 | 0,6689 |
| TcCLB.508307.60  | hypothetical protein, conserved                          | 0,0546  | 0,5915 |
| TcCLB.511363.4   | hypothetical protein, conserved                          | 0,05453 | 0,7404 |
| TcCLB.509799.110 | hypothetical protein, conserved                          | 0,0545  | 0,7789 |
| TcCLB.511511.170 | ADP-ribosylation factor-like protein, putative           | 0,05424 | 0,7034 |
| TcCLB.511817.190 | hypothetical protein, conserved                          | 0,05417 | 0,6736 |
| TcCLB.509965.340 | hypothetical protein, conserved                          | 0,05408 | 0,629  |
| TcCLB.509643.30  | hypothetical protein, conserved                          | 0,05399 | 0,6246 |
| TcCLB.509109.100 | hypothetical protein, conserved                          | 0,05394 | 0,7946 |
| TcCLB.511725.240 | hypothetical protein, conserved                          | 0,05389 | 0,5551 |
| TcCLB.507611.180 | hypothetical protein                                     | 0,05383 | 0,8669 |
| TcCLB.507491.119 | hypothetical protein, conserved                          | 0,05381 | 0,6091 |
| TcCLB.503613.79  | hypothetical protein                                     | 0,05378 | 0,7288 |
| TcCLB.506249.40  | hypothetical protein, conserved                          | 0,05372 | 0,6563 |
| TcCLB.509493.60  | hypothetical protein                                     | 0,05369 | 0,8226 |
| TcCLB.506739.40  | hypothetical protein, conserved                          | 0,05366 | 0,6833 |
| TcCLB.510709.41  | hypothetical protein, conserved                          | 0,05344 | 0,9051 |
| TcCLB.507911.33  | retrotransposon hot spot protein (RHS, pseudogene), puta | 0,05341 | 0,8736 |
| TcCLB.506203.110 | hypothetical protein, conserved                          | 0,05339 | 0,6543 |
| TcCLB.506625.120 | hypothetical protein, conserved                          | 0,05325 | 0,615  |
| TcCLB.511245.200 | hypothetical protein, conserved                          | 0,0532  | 0,5606 |
| TcCLB.506227.200 | hypothetical protein                                     | 0,05309 | 0,6768 |
| TcCLB.506469.110 | hypothetical protein                                     | 0,05283 | 0,7385 |
| TcCLB.509429.290 | hydroxyacylglutathione hydrolase, putative               | 0,05274 | 0,7501 |
| TcCLB.510939.9   | hypothetical protein, conserved                          | 0,05271 | 0,8094 |
| TcCLB.509413.10  | hypothetical protein, conserved                          | 0,05252 | 0,6081 |
| TcCLB.506529.140 | hypothetical protein, conserved                          | 0,05246 | 0,7177 |
| TcCLB.510759.50  | hypothetical protein                                     | 0,05233 | 0,6728 |
| TcCLB.507641.240 | hypothetical protein                                     | 0,05222 | 0,8622 |
| TcCLB.511027.10  | chloride channel protein, putative                       | 0,05217 | 0,6734 |
| TcCLB.503755.50  | hypothetical protein, conserved                          | 0,05216 | 0,6765 |
| TcCLB.508819.20  | hypothetical protein, conserved                          | 0,05215 | 0,6699 |
| TcCLB.510265.30  | hypothetical protein, conserved                          | 0,05211 | 0,5107 |
| TcCLB.510515.70  | hypothetical protein, conserved                          | 0,0521  | 0,8175 |
| TcCLB.508089.60  | hypothetical protein, conserved                          | 0,05204 | 0,7183 |
| TcCLB.511153.124 | hypothetical protein, conserved                          | 0,05202 | 0,7753 |
| TcCLB.511071.40  | amastin, putative                                        | 0,05193 | 0,7408 |
| TcCLB.503419.54  | hypothetical protein, conserved                          | 0,05192 | 0,7568 |
| TcCLB.511589.190 | hypothetical protein, conserved                          | 0,0519  | 0,7381 |
| TcCLB.510039.36  | hypothetical protein                                     | 0,05186 | 0,8203 |

|                  |                                                          |         |        |
|------------------|----------------------------------------------------------|---------|--------|
| TcCLB.511039.39  | hypothetical protein, conserved                          | 0,05185 | 0,7234 |
| TcCLB.510735.90  | hypothetical protein, conserved                          | 0,0518  | 0,7466 |
| TcCLB.506695.10  | actin-like protein, putative                             | 0,0517  | 0,7424 |
| TcCLB.508443.40  | hypothetical protein                                     | 0,05152 | 0,7366 |
| TcCLB.508691.20  | hypothetical protein, conserved                          | 0,05136 | 0,7082 |
| TcCLB.507979.50  | hypothetical protein, conserved                          | 0,05132 | 0,637  |
| TcCLB.508325.30  | dispersed gene family protein 1 (DGF-1), putative        | 0,05126 | 0,7577 |
| TcCLB.507517.110 | hypothetical protein, conserved                          | 0,05118 | 0,7253 |
| TcCLB.511545.30  | hypothetical protein, conserved                          | 0,05103 | 0,6851 |
| TcCLB.507629.20  | hypothetical protein, conserved                          | 0,051   | 0,5698 |
| TcCLB.508819.10  | hypothetical protein, conserved                          | 0,05083 | 0,7494 |
| TcCLB.511287.150 | fibrillarin, putative                                    | 0,05077 | 0,7034 |
| TcCLB.511101.19  | retrotransposon hot spot (RHS) protein, putative         | 0,05055 | 0,7605 |
| TcCLB.508177.60  | hypothetical protein, conserved                          | 0,05053 | 0,7009 |
| TcCLB.504137.160 | hypothetical protein, conserved                          | 0,05053 | 0,7896 |
| TcCLB.509505.20  | hypothetical protein, conserved                          | 0,05052 | 0,7121 |
| TcCLB.420293.31  | hypothetical protein                                     | 0,05038 | 0,871  |
| TcCLB.510729.90  | hypothetical protein, conserved                          | 0,05036 | 0,7056 |
| TcCLB.508541.140 | surface protease GP63 (pseudogene), putative             | 0,05027 | 0,8461 |
| TcCLB.442427.10  | trans-sialidase (pseudogene), putative                   | 0,05017 | 0,8045 |
| TcCLB.503479.49  | U6 snRNA-associated Sm-like protein LSm7p                | 0,05016 | 0,7461 |
| TcCLB.511463.10  | rRNA dimethyltransferase, putative                       | 0,05012 | 0,7103 |
| TcCLB.506779.170 | haloacid dehalogenase hydrolase, putative                | 0,05009 | 0,7084 |
| TcCLB.508601.110 | hypothetical protein, conserved                          | 0,04992 | 0,6041 |
| TcCLB.510725.30  | hypothetical protein, conserved                          | 0,0499  | 0,7485 |
| TcCLB.508743.5   | hypothetical protein, conserved (pseudogene)             | 0,04985 | 0,8749 |
| TcCLB.506505.40  | protein kinase, putative                                 | 0,04977 | 0,632  |
| TcCLB.505051.20  | Checkpoint protein HUS1, putative (hus1)                 | 0,04955 | 0,6809 |
| TcCLB.505941.10  | surface protease GP63, putative                          | 0,04949 | 0,7661 |
| TcCLB.507515.130 | hypothetical protein, conserved                          | 0,04943 | 0,7478 |
| TcCLB.507223.20  | hypothetical protein, conserved                          | 0,04937 | 0,8582 |
| TcCLB.467795.19  | hypothetical protein, conserved                          | 0,04916 | 0,7626 |
| TcCLB.511215.40  | hypothetical protein, conserved                          | 0,04913 | 0,6294 |
| TcCLB.508041.20  | hypothetical protein, conserved                          | 0,04904 | 0,6714 |
| TcCLB.504077.40  | translation elongation factor EF-2, putative             | 0,04904 | 0,6871 |
| TcCLB.511801.4   | hypothetical protein, conserved                          | 0,04895 | 0,7038 |
| TcCLB.508953.40  | hypothetical protein, conserved                          | 0,04874 | 0,7339 |
| TcCLB.508175.189 | hypothetical protein, conserved                          | 0,04874 | 0,7371 |
| TcCLB.511365.70  | proteasome regulatory non-ATP-ase subunit 9, putative (F | 0,0487  | 0,6636 |
| TcCLB.511493.5   | hypothetical protein, conserved                          | 0,0487  | 0,857  |
| TcCLB.509081.10  | elongation factor 1-gamma (EF-1-gamma), putative         | 0,0486  | 0,8192 |
| TcCLB.509733.90  | hypothetical protein, conserved                          | 0,04855 | 0,6416 |
| TcCLB.508277.130 | hypothetical protein, conserved                          | 0,04847 | 0,778  |
| TcCLB.511283.109 | AP-4 complex subunit sigma-1, putative                   | 0,04836 | 0,7548 |
| TcCLB.511301.110 | inosine-5'-monophosphate dehydrogenase, putative         | 0,04829 | 0,5225 |

|                  |                                                           |         |        |
|------------------|-----------------------------------------------------------|---------|--------|
| TcCLB.511355.30  | phosphatidic acid phosphatase protein, putative           | 0,04792 | 0,6996 |
| TcCLB.508693.10  | cleavage and polyadenylation specificity factor, putative | 0,04782 | 0,5957 |
| TcCLB.511209.50  | hypothetical protein, conserved                           | 0,04774 | 0,7223 |
| TcCLB.508323.30  | hypothetical protein, conserved                           | 0,04763 | 0,7275 |
| TcCLB.503909.110 | intraflagellar transport (IFT) protein, putative (IFT20)  | 0,04749 | 0,7599 |
| TcCLB.507681.40  | hypothetical protein                                      | 0,04748 | 0,7264 |
| TcCLB.503673.27  | 8-oxoguanine DNA glycosylase (pseudogene), putative       | 0,04746 | 0,8399 |
| TcCLB.506419.10  | ribosomal protein L7/L12, putative                        | 0,04731 | 0,7625 |
| TcCLB.508629.68  | N-acetyltransferase complex ARD1 subunit (pseudogene),    | 0,04731 | 0,867  |
| TcCLB.504147.320 | hypothetical protein, conserved                           | 0,04722 | 0,5993 |
| TcCLB.506679.220 | nucleoplasmin-like protein (NLP), putative                | 0,04722 | 0,6175 |
| TcCLB.506559.260 | ATP-dependent RNA helicase, putative                      | 0,04721 | 0,6008 |
| TcCLB.506175.50  | hypothetical protein, conserved                           | 0,04721 | 0,6588 |
| TcCLB.509217.143 | ATP-dependent DEAD/H RNA helicase (pseudogene), puta      | 0,04714 | 0,8864 |
| TcCLB.507641.30  | hypothetical protein, conserved                           | 0,04705 | 0,6442 |
| TcCLB.506485.90  | hypothetical protein, conserved                           | 0,04691 | 0,6883 |
| TcCLB.508741.380 | hypothetical protein, conserved                           | 0,04689 | 0,5692 |
| TcCLB.511617.9   | NUP-1 protein (pseudogene), putative                      | 0,04684 | 0,5172 |
| TcCLB.506247.180 | hypothetical protein, conserved                           | 0,04683 | 0,6322 |
| TcCLB.506233.20  | retrotransposon hot spot protein (RHS, pseudogene), puta  | 0,04681 | 0,8658 |
| TcCLB.511865.90  | dynein heavy chain, putative                              | 0,04633 | 0,7264 |
| TcCLB.508199.60  | hypothetical protein, conserved                           | 0,04633 | 0,8188 |
| TcCLB.510685.20  | hypothetical protein                                      | 0,04627 | 0,7585 |
| TcCLB.504047.50  | hypothetical protein, conserved                           | 0,04625 | 0,6679 |
| TcCLB.507817.60  | Present in the outer mitochondrial membrane proteome 3    | 0,0461  | 0,6294 |
| TcCLB.507515.40  | hypothetical protein, conserved                           | 0,0461  | 0,7761 |
| TcCLB.508707.340 | serine/threonine protein phosphatase, putative (fragment  | 0,04602 | 0,8282 |
| TcCLB.507491.130 | hypothetical protein, conserved                           | 0,046   | 0,7283 |
| TcCLB.510431.180 | Present in the outer mitochondrial membrane proteome 1    | 0,04599 | 0,6986 |
| TcCLB.508881.80  | DNA ligase, putative                                      | 0,04589 | 0,8163 |
| TcCLB.506477.30  | tubulin-tyrosine ligase, putative                         | 0,04582 | 0,7061 |
| TcCLB.511001.230 | hypothetical protein, conserved                           | 0,04574 | 0,7209 |
| TcCLB.509455.20  | hypothetical protein, conserved                           | 0,0457  | 0,7074 |
| TcCLB.509119.10  | oligomeric golgi complex component 8, putative            | 0,04568 | 0,7277 |
| TcCLB.508409.270 | RNA-binding protein, putative                             | 0,04553 | 0,7065 |
| TcCLB.509647.150 | calcium-transporting ATPase, putative                     | 0,04552 | 0,5887 |
| TcCLB.506779.60  | DNA-directed RNA polymerase II, subunit 9, putative       | 0,04507 | 0,7582 |
| TcCLB.511439.70  | hypothetical protein, conserved                           | 0,04496 | 0,7084 |
| TcCLB.508859.109 | exosome complex exonuclease, putative                     | 0,04491 | 0,8078 |
| TcCLB.506025.70  | dolichyl-lipid chaperone, putative (rft1)                 | 0,04466 | 0,7841 |
| TcCLB.509157.110 | hypothetical protein, conserved                           | 0,04466 | 0,8048 |
| TcCLB.508995.30  | tubulin-tyrosine ligase, putative                         | 0,04465 | 0,7327 |
| TcCLB.508525.30  | hypothetical protein, conserved                           | 0,04446 | 0,7066 |
| TcCLB.504109.30  | hypothetical protein, conserved                           | 0,04443 | 0,6781 |
| TcCLB.510933.140 | trans-sialidase (pseudogene), putative                    | 0,04435 | 0,9053 |



|                  |                                                             |         |        |
|------------------|-------------------------------------------------------------|---------|--------|
| TcCLB.511543.50  | hypothetical protein, conserved                             | 0,04432 | 0,7867 |
| TcCLB.503577.20  | U2 splicing auxiliary factor, putative (u2af26)             | 0,04427 | 0,616  |
| TcCLB.508059.10  | hypothetical protein, conserved                             | 0,0442  | 0,8039 |
| TcCLB.511575.110 | hypothetical protein, conserved                             | 0,04419 | 0,7068 |
| TcCLB.509459.40  | hypothetical protein, conserved                             | 0,04416 | 0,7092 |
| TcCLB.507801.114 | aldo-keto reductase (pseudogene), putative                  | 0,04412 | 0,7865 |
| TcCLB.506847.4   | hypothetical protein, conserved                             | 0,0439  | 0,8421 |
| TcCLB.506893.50  | hypothetical protein, conserved                             | 0,04387 | 0,8395 |
| TcCLB.511433.20  | hypothetical protein, conserved                             | 0,04381 | 0,8591 |
| TcCLB.510943.190 | myosin heavy chain MYA2-related, putative                   | 0,04374 | 0,6958 |
| TcCLB.506637.20  | hypothetical protein, conserved                             | 0,04374 | 0,7561 |
| TcCLB.509715.26  | hypothetical protein, conserved                             | 0,04374 | 0,7752 |
| TcCLB.508121.15  | hypothetical protein, conserved (pseudogene)                | 0,04373 | 0,8246 |
| TcCLB.508153.800 | hypothetical protein                                        | 0,04371 | 0,7652 |
| TcCLB.508919.90  | hypothetical protein, conserved                             | 0,0437  | 0,7786 |
| TcCLB.509915.10  | trans-sialidase (pseudogene), putative                      | 0,04355 | 0,8639 |
| TcCLB.508631.40  | hypothetical protein, conserved (pseudogene)                | 0,0434  | 0,7261 |
| TcCLB.504167.20  | mucin TcMUCl, putative                                      | 0,0434  | 0,7977 |
| TcCLB.506567.134 | hypothetical protein, conserved                             | 0,04336 | 0,7353 |
| TcCLB.509979.110 | hypothetical protein, conserved                             | 0,04336 | 0,8095 |
| TcCLB.507669.84  | ATP-dependent DEAD/H RNA helicase, putative                 | 0,04328 | 0,6726 |
| TcCLB.511719.10  | phosphatidylinositol 3-related kinase, putative             | 0,04314 | 0,6551 |
| TcCLB.510215.10  | NADH-dependent fumarate reductase, putative                 | 0,04313 | 0,7865 |
| TcCLB.510629.101 | hypothetical protein, conserved (pseudogene)                | 0,0431  | 0,941  |
| TcCLB.510741.50  | hypothetical protein, conserved                             | 0,04303 | 0,7139 |
| TcCLB.509065.130 | hypothetical protein, conserved                             | 0,043   | 0,7501 |
| TcCLB.509601.5   | mannosyl-oligosaccharide 1,2-alpha-mannosidase IB, putative | 0,04282 | 0,8674 |
| TcCLB.507821.101 | hypothetical protein, conserved (pseudogene)                | 0,04272 | 0,8415 |
| TcCLB.507053.60  | hypothetical protein, conserved                             | 0,0427  | 0,6873 |
| TcCLB.510089.160 | hypothetical protein, conserved (pseudogene)                | 0,04265 | 0,6459 |
| TcCLB.504047.34  | acylphosphatase, putative                                   | 0,04245 | 0,8201 |
| TcCLB.506407.30  | hypothetical protein, conserved                             | 0,04231 | 0,736  |
| TcCLB.511211.20  | Coatmer subunit gamma (COPG)                                | 0,04229 | 0,6561 |
| TcCLB.506983.10  | hypothetical protein, conserved                             | 0,04228 | 0,7962 |
| TcCLB.503993.30  | surface protease GP63, putative                             | 0,04228 | 0,8221 |
| TcCLB.504055.81  | ubiquitin-protein ligase, putative                          | 0,04223 | 0,7559 |
| TcCLB.511491.60  | kinesin, putative                                           | 0,04221 | 0,6691 |
| TcCLB.509507.40  | hypothetical protein, conserved                             | 0,04212 | 0,7665 |
| TcCLB.503635.89  | hypothetical protein, conserved                             | 0,0421  | 0,7884 |
| TcCLB.508347.80  | Present in the outer mitochondrial membrane proteome 2      | 0,04206 | 0,6612 |
| TcCLB.510687.80  | hypothetical protein, conserved                             | 0,04203 | 0,765  |
| TcCLB.510089.70  | hypothetical protein                                        | 0,04199 | 0,8394 |
| TcCLB.506649.110 | hypothetical protein, conserved                             | 0,04193 | 0,8027 |
| TcCLB.506473.14  | Protein transport protein yif1, putative                    | 0,04189 | 0,763  |
| TcCLB.508153.160 | hypothetical protein, conserved                             | 0,04185 | 0,799  |

|                  |                                                             |         |        |
|------------------|-------------------------------------------------------------|---------|--------|
| TcCLB.506989.309 | hypothetical protein, conserved                             | 0,0417  | 0,7116 |
| TcCLB.506729.30  | hypothetical protein, conserved                             | 0,04169 | 0,8176 |
| TcCLB.504153.300 | GTPase protein, putative                                    | 0,04165 | 0,7104 |
| TcCLB.405737.14  | hypothetical protein                                        | 0,04159 | 0,7876 |
| TcCLB.511855.60  | hypothetical protein, conserved                             | 0,04152 | 0,7653 |
| TcCLB.503525.50  | RNA helicase, putative                                      | 0,04137 | 0,799  |
| TcCLB.503855.80  | hypothetical protein, conserved                             | 0,04125 | 0,7394 |
| TcCLB.507667.11  | hypothetical protein, conserved (fragment)                  | 0,04119 | 0,781  |
| TcCLB.511771.199 | hypothetical protein                                        | 0,04114 | 0,9225 |
| TcCLB.507625.160 | hypothetical protein, conserved                             | 0,04113 | 0,8281 |
| TcCLB.506583.50  | hypothetical protein, conserved                             | 0,0411  | 0,7755 |
| TcCLB.510203.19  | surface protease GP63 (pseudogene), putative                | 0,04106 | 0,9229 |
| TcCLB.504131.110 | hypothetical protein, conserved                             | 0,04094 | 0,7987 |
| TcCLB.506155.10  | hypothetical protein, conserved                             | 0,04093 | 0,768  |
| TcCLB.509751.10  | hypothetical protein, conserved                             | 0,04089 | 0,7983 |
| TcCLB.510307.19  | mucin-associated surface protein (MASP, pseudogene), pu     | 0,04075 | 0,8603 |
| TcCLB.503823.150 | hypothetical protein, conserved                             | 0,04068 | 0,7638 |
| TcCLB.510769.40  | hypothetical protein, conserved                             | 0,04063 | 0,7643 |
| TcCLB.511119.10  | dispersed gene family protein 1 (DGF-1), putative (fragmε   | 0,04054 | 0,885  |
| TcCLB.503703.10  | hypothetical protein, conserved                             | 0,0405  | 0,773  |
| TcCLB.506173.10  | hypothetical protein, conserved                             | 0,04049 | 0,8117 |
| TcCLB.510747.114 | hypothetical protein, conserved                             | 0,04047 | 0,8703 |
| TcCLB.509023.40  | hypothetical protein, conserved                             | 0,04043 | 0,7627 |
| TcCLB.510339.7   | hypothetical protein, conserved (fragment)                  | 0,04041 | 0,7686 |
| TcCLB.511907.60  | hypothetical protein, conserved                             | 0,0404  | 0,7806 |
| TcCLB.506925.160 | hypothetical protein, conserved                             | 0,04033 | 0,784  |
| TcCLB.506821.50  | hypothetical protein                                        | 0,04028 | 0,8318 |
| TcCLB.509825.7   | hypothetical protein, conserved                             | 0,0402  | 0,9288 |
| TcCLB.505999.110 | NADH-ubiquinone oxidoreductase complex I subunit, putat     | 0,04005 | 0,7702 |
| TcCLB.510667.60  | peptidyl-prolyl cis-trans isomerase (cyclophilin), putative | 0,03989 | 0,7884 |
| TcCLB.510531.90  | hypothetical protein, conserved (pseudogene)                | 0,0398  | 0,7682 |
| TcCLB.507491.10  | hypothetical protein, conserved                             | 0,03977 | 0,7493 |
| TcCLB.509017.20  | hypothetical protein, conserved                             | 0,03972 | 0,7565 |
| TcCLB.506699.10  | hypothetical protein, conserved                             | 0,03971 | 0,8121 |
| TcCLB.507089.280 | chaperone DnaJ protein (pseudogene), putative               | 0,03971 | 0,8552 |
| TcCLB.511561.20  | dispersed gene family protein 1 (DGF-1), putative           | 0,03967 | 0,8337 |
| TcCLB.511529.259 | hypothetical protein, conserved                             | 0,03965 | 0,8817 |
| TcCLB.508303.40  | hypothetical protein, conserved                             | 0,03961 | 0,7944 |
| TcCLB.508817.140 | hypothetical protein, conserved                             | 0,03948 | 0,6995 |
| TcCLB.506221.129 | hypothetical protein, conserved (fragment)                  | 0,03939 | 0,798  |
| TcCLB.511867.50  | proteasome alpha 7 subunit, putative                        | 0,03935 | 0,7475 |
| TcCLB.507811.20  | delta-adaptin, putative                                     | 0,03934 | 0,7468 |
| TcCLB.507925.30  | hypothetical protein, conserved                             | 0,03931 | 0,8582 |
| TcCLB.507389.79  | hypothetical protein, conserved                             | 0,03928 | 0,8231 |
| TcCLB.506815.40  | mitochondrial RNA binding complex 1 subunit, putative       | 0,03924 | 0,8185 |

|                  |                                                              |         |        |
|------------------|--------------------------------------------------------------|---------|--------|
| TcCLB.509005.10  | axoneme central apparatus protein (fragment) (PF16)          | 0,03924 | 0,846  |
| TcCLB.508277.80  | hypothetical protein, conserved                              | 0,03916 | 0,7963 |
| TcCLB.509965.360 | hypothetical protein, conserved                              | 0,03908 | 0,8108 |
| TcCLB.503583.100 | hypothetical protein, conserved                              | 0,03905 | 0,8203 |
| TcCLB.507673.10  | serine/threonine-protein phosphatase PP1, putative           | 0,03905 | 0,8233 |
| TcCLB.508601.100 | hypothetical protein, conserved                              | 0,03888 | 0,6971 |
| TcCLB.510667.4   | hypothetical protein, conserved (fragment)                   | 0,03886 | 0,7833 |
| TcCLB.461927.9   | adenosine monophosphate deaminase, putative                  | 0,03883 | 0,7983 |
| TcCLB.506953.45  | ascorbate-dependent peroxidase (pseudogene), putative        | 0,03877 | 0,8506 |
| TcCLB.503825.19  | protein kinase, putative                                     | 0,03867 | 0,8798 |
| TcCLB.422189.10  | nucleoside phosphatase, putative                             | 0,03866 | 0,7836 |
| TcCLB.507771.60  | hypothetical protein, conserved                              | 0,03854 | 0,7054 |
| TcCLB.503833.50  | hypothetical protein, conserved                              | 0,03841 | 0,6722 |
| TcCLB.508153.500 | helicase, putative                                           | 0,0384  | 0,6636 |
| TcCLB.511843.60  | retrotransposon hot spot protein (RHS, pseudogene), puta     | 0,03824 | 0,8523 |
| TcCLB.508707.100 | hypothetical protein, conserved                              | 0,03822 | 0,7139 |
| TcCLB.510737.90  | hypothetical protein, conserved                              | 0,0379  | 0,8276 |
| TcCLB.511815.4   | proteasome regulatory ATPase subunit 5, putative (fragm      | 0,03789 | 0,7725 |
| TcCLB.511033.20  | hypothetical protein                                         | 0,03777 | 0,7528 |
| TcCLB.506695.4   | Putative intraflagellar transport protein C3 (fragment) (PII | 0,03765 | 0,811  |
| TcCLB.506127.140 | hypothetical protein                                         | 0,03747 | 0,7112 |
| TcCLB.510533.40  | Mu-adaptin 1, putative                                       | 0,03746 | 0,7329 |
| TcCLB.511107.10  | hypothetical protein, conserved (pseudogene)                 | 0,03745 | 0,7561 |
| TcCLB.506989.70  | flagellar radial spoke protein-like, putative                | 0,0373  | 0,799  |
| TcCLB.511179.114 | hypothetical protein, conserved                              | 0,03723 | 0,8322 |
| TcCLB.469785.30  | hypothetical protein                                         | 0,03714 | 0,8022 |
| TcCLB.511787.30  | hypothetical protein, conserved (pseudogene)                 | 0,03711 | 0,8715 |
| TcCLB.504047.70  | hypothetical protein, conserved                              | 0,03704 | 0,7374 |
| TcCLB.510325.50  | DNA replication complex GINS protein SLD5, putative          | 0,03704 | 0,8419 |
| TcCLB.510105.36  | hypothetical protein, conserved                              | 0,03694 | 0,7983 |
| TcCLB.504203.20  | sec1-like protein, putative                                  | 0,03691 | 0,7161 |
| TcCLB.510873.20  | surface protease GP63, putative                              | 0,0369  | 0,7969 |
| TcCLB.506227.210 | hypothetical protein, conserved                              | 0,0369  | 0,8121 |
| TcCLB.506459.160 | mucin TcMUCII (pseudogene), putative                         | 0,03683 | 0,9216 |
| TcCLB.508837.130 | hypothetical protein, conserved                              | 0,03679 | 0,7714 |
| TcCLB.506725.40  | hypothetical protein, conserved                              | 0,03679 | 0,809  |
| TcCLB.509319.20  | hypothetical protein, conserved                              | 0,03678 | 0,8706 |
| TcCLB.507085.30  | trans-sialidase, Group I, putative                           | 0,03671 | 0,7576 |
| TcCLB.508153.310 | protein kinase, putative                                     | 0,03659 | 0,7665 |
| TcCLB.506477.14  | hypothetical protein, conserved                              | 0,03653 | 0,7999 |
| TcCLB.506529.224 | hypothetical protein, conserved                              | 0,03644 | 0,826  |
| TcCLB.511855.70  | protein kinase, putative                                     | 0,03622 | 0,7685 |
| TcCLB.506559.430 | TPR-repeat protein, putative                                 | 0,03619 | 0,697  |
| TcCLB.507023.289 | hypothetical protein, conserved (fragment)                   | 0,03609 | 0,85   |
| TcCLB.504017.30  | hypothetical protein, conserved                              | 0,03601 | 0,7569 |

|                  |                                                          |         |        |
|------------------|----------------------------------------------------------|---------|--------|
| TcCLB.507949.60  | hypothetical protein, conserved                          | 0,0359  | 0,7841 |
| TcCLB.510155.150 | hypothetical protein, conserved                          | 0,03576 | 0,7684 |
| TcCLB.511127.200 | kinesin, putative                                        | 0,03572 | 0,7759 |
| TcCLB.508629.74  | retrotransposon hot spot protein (RHS, pseudogene), puta | 0,03566 | 0,8013 |
| TcCLB.506885.200 | hypothetical protein, conserved                          | 0,03556 | 0,6973 |
| TcCLB.507669.90  | hypothetical protein, conserved                          | 0,03545 | 0,7615 |
| TcCLB.510663.50  | hypothetical protein, conserved                          | 0,03544 | 0,7514 |
| TcCLB.504717.30  | hypothetical protein, conserved                          | 0,03542 | 0,7951 |
| TcCLB.506201.110 | hypothetical protein, conserved                          | 0,03517 | 0,7984 |
| TcCLB.510963.70  | ARP2/3 complex subunit, putative                         | 0,03516 | 0,8255 |
| TcCLB.510667.20  | hypothetical protein, conserved                          | 0,03516 | 0,8613 |
| TcCLB.510143.60  | hypothetical protein, conserved                          | 0,03492 | 0,8085 |
| TcCLB.510565.120 | hypothetical protein, conserved                          | 0,03487 | 0,8129 |
| TcCLB.503723.10  | hypothetical protein, conserved                          | 0,03478 | 0,8332 |
| TcCLB.503449.20  | copper homeostasis protein, putative                     | 0,03465 | 0,8127 |
| TcCLB.508029.40  | hypothetical protein                                     | 0,03458 | 0,8531 |
| TcCLB.507017.120 | ubiquitin hydrolase, putative                            | 0,03446 | 0,715  |
| TcCLB.506753.180 | hypothetical protein, conserved                          | 0,03429 | 0,8591 |
| TcCLB.509893.20  | hypothetical protein, conserved                          | 0,03426 | 0,7288 |
| TcCLB.507511.71  | hypothetical protein (pseudogene)                        | 0,03426 | 0,9022 |
| TcCLB.510903.10  | tRNA pseudouridine synthase, putative                    | 0,0342  | 0,8226 |
| TcCLB.508625.90  | DNA damage repair protein, putative                      | 0,03418 | 0,7569 |
| TcCLB.508415.59  | hypothetical protein, conserved                          | 0,03416 | 0,8848 |
| TcCLB.509767.160 | hypothetical protein, conserved                          | 0,03405 | 0,863  |
| TcCLB.510741.110 | hypothetical protein, conserved                          | 0,03403 | 0,8    |
| TcCLB.508277.290 | hypothetical protein, conserved                          | 0,03386 | 0,6802 |
| TcCLB.507809.80  | hypothetical protein, conserved                          | 0,03375 | 0,6721 |
| TcCLB.506123.60  | hypothetical protein, conserved                          | 0,03374 | 0,8053 |
| TcCLB.509657.61  | elongation factor 1-gamma (EF-1-gamma, pseudogene),      | 0,0337  | 0,924  |
| TcCLB.504241.85  | hypothetical protein, conserved (pseudogene)             | 0,03368 | 0,8778 |
| TcCLB.504193.51  | ATP-dependent DEAD/H RNA helicase (pseudogene), puta     | 0,03358 | 0,8261 |
| TcCLB.508075.60  | hypothetical protein, conserved                          | 0,03349 | 0,7948 |
| TcCLB.511025.20  | hypothetical protein, conserved                          | 0,03346 | 0,7876 |
| TcCLB.506581.69  | Mutt-Nudix-related hydrolase 5, putative                 | 0,03341 | 0,8496 |
| TcCLB.510657.120 | hypothetical protein, conserved                          | 0,03338 | 0,8802 |
| TcCLB.511017.30  | cyclin dependent kinase-binding protein, putative        | 0,03335 | 0,7481 |
| TcCLB.506855.209 | U6 snRNA-associated Sm-like protein LSm7p                | 0,03332 | 0,8261 |
| TcCLB.506925.480 | ribokinase, putative                                     | 0,03331 | 0,8186 |
| TcCLB.505267.110 | dispersed gene family protein 1 (DGF-1), putative        | 0,03314 | 0,8821 |
| TcCLB.506405.80  | hypothetical protein, conserved                          | 0,03303 | 0,8228 |
| TcCLB.507981.51  | trans-sialidase (pseudogene), putative                   | 0,03303 | 0,9225 |
| TcCLB.511445.20  | radial spoke protein 3, putative (RSP3)                  | 0,0329  | 0,7936 |
| TcCLB.503835.30  | hypothetical protein, conserved                          | 0,0329  | 0,8005 |
| TcCLB.506435.120 | ATP-dependent RNA helicase, putative                     | 0,03276 | 0,7377 |
| TcCLB.510303.50  | deoxyribose-phosphate aldolase, putative                 | 0,03269 | 0,7963 |

|                  |                                                            |         |        |
|------------------|------------------------------------------------------------|---------|--------|
| TcCLB.504045.50  | hypothetical protein                                       | 0,03268 | 0,7966 |
| TcCLB.508357.100 | hypothetical protein, conserved                            | 0,03266 | 0,7259 |
| TcCLB.504153.10  | hypothetical protein, conserved                            | 0,03265 | 0,8708 |
| TcCLB.508543.160 | hypothetical protein, conserved                            | 0,03243 | 0,7703 |
| TcCLB.507049.150 | hypothetical protein, conserved                            | 0,03238 | 0,8188 |
| TcCLB.510087.40  | hypothetical protein                                       | 0,03235 | 0,931  |
| TcCLB.511255.700 | trans-sialidase, Group V, putative                         | 0,03233 | 0,9087 |
| TcCLB.511283.240 | hypothetical protein, conserved                            | 0,0323  | 0,6869 |
| TcCLB.461165.10  | hypothetical protein, conserved                            | 0,03229 | 0,8379 |
| TcCLB.504017.50  | hypothetical protein, conserved                            | 0,03227 | 0,8642 |
| TcCLB.506859.20  | proteasome regulatory ATPase subunit 5, putative           | 0,03219 | 0,7765 |
| TcCLB.506743.220 | hypothetical protein, conserved                            | 0,03214 | 0,8831 |
| TcCLB.510101.260 | hypothetical protein, conserved                            | 0,03203 | 0,7601 |
| TcCLB.507509.20  | hypothetical protein, conserved                            | 0,03203 | 0,7891 |
| TcCLB.508719.80  | hypothetical protein, conserved                            | 0,03196 | 0,8324 |
| TcCLB.508465.10  | aminotransferase, putative                                 | 0,03193 | 0,8264 |
| TcCLB.503459.10  | hypothetical protein, conserved                            | 0,03184 | 0,8275 |
| TcCLB.506775.40  | hypothetical protein, conserved                            | 0,03181 | 0,7826 |
| TcCLB.506825.230 | hypothetical protein, conserved                            | 0,03175 | 0,7219 |
| TcCLB.506733.10  | hypothetical protein, conserved                            | 0,03174 | 0,8316 |
| TcCLB.506697.10  | hypothetical protein, conserved                            | 0,03168 | 0,7722 |
| TcCLB.506211.230 | hypothetical protein, conserved                            | 0,03156 | 0,8055 |
| TcCLB.511753.70  | hypothetical protein, conserved                            | 0,03152 | 0,7717 |
| TcCLB.509985.40  | hypothetical protein, conserved                            | 0,03144 | 0,8193 |
| TcCLB.508221.697 | trans-sialidase (pseudogene), putative                     | 0,03143 | 0,9015 |
| TcCLB.510533.110 | hypothetical protein, conserved                            | 0,03136 | 0,799  |
| TcCLB.504147.130 | hypothetical protein, conserved                            | 0,03122 | 0,8085 |
| TcCLB.508881.20  | hypothetical protein, conserved                            | 0,03096 | 0,8168 |
| TcCLB.507209.50  | hypothetical protein, conserved                            | 0,03089 | 0,8133 |
| TcCLB.506629.210 | hypothetical protein, conserved                            | 0,03085 | 0,8208 |
| TcCLB.506869.70  | mitochondrial structure specific endonuclease I (SSE-1), p | 0,03081 | 0,8189 |
| TcCLB.507541.40  | casein kinase, putative                                    | 0,03069 | 0,6997 |
| TcCLB.509059.20  | hypothetical protein, conserved                            | 0,03069 | 0,7881 |
| TcCLB.511543.60  | glutathione peroxidase, putative                           | 0,03053 | 0,8473 |
| TcCLB.508189.31  | hypothetical protein, conserved (pseudogene)               | 0,03039 | 0,9242 |
| TcCLB.506937.40  | dynein heavy chain, putative                               | 0,03037 | 0,8036 |
| TcCLB.504041.29  | DNA repair protein, putative                               | 0,0303  | 0,8377 |
| TcCLB.508131.19  | hypothetical protein, conserved (fragment)                 | 0,03023 | 0,836  |
| TcCLB.507275.30  | hypothetical protein, conserved                            | 0,03021 | 0,8265 |
| TcCLB.503959.30  | hypothetical protein, conserved                            | 0,03016 | 0,7684 |
| TcCLB.509205.10  | guanine-nucleotide-exchange-factor, putative               | 0,03002 | 0,8484 |
| TcCLB.511317.70  | RNA-binding protein, putative (RBP30)                      | 0,02977 | 0,8195 |
| TcCLB.510687.90  | hypothetical protein, conserved                            | 0,02971 | 0,8259 |
| TcCLB.505183.90  | hypothetical protein, conserved                            | 0,02965 | 0,8889 |
| TcCLB.507739.80  | hypothetical protein, conserved                            | 0,02961 | 0,7987 |

|                  |                                                             |         |        |
|------------------|-------------------------------------------------------------|---------|--------|
| TcCLB.503473.10  | protein kinase, putative                                    | 0,0296  | 0,8156 |
| TcCLB.507669.70  | Dynein intermediate chain 1, axonemal (DNAI1)               | 0,02953 | 0,827  |
| TcCLB.508181.130 | peter pan protein, putative                                 | 0,02951 | 0,8168 |
| TcCLB.510423.60  | hypothetical protein, conserved                             | 0,0295  | 0,7951 |
| TcCLB.509699.85  | surface protease GP63 (pseudogene), putative                | 0,02949 | 0,9254 |
| TcCLB.511239.70  | hypothetical protein, conserved                             | 0,02929 | 0,8118 |
| TcCLB.506819.49  | hypothetical protein, conserved                             | 0,02929 | 0,8672 |
| TcCLB.507801.90  | beta-ketoacyl-ACP reductase                                 | 0,02921 | 0,8494 |
| TcCLB.509999.40  | COPII coat assembly protein sec16, putative (sec16)         | 0,02905 | 0,7268 |
| TcCLB.510003.30  | phosphatidylinositol 4-kinase alpha, putative               | 0,02899 | 0,7705 |
| TcCLB.509455.120 | Peptide chain release factor 1, mitochondrial, putative (RI | 0,02892 | 0,8176 |
| TcCLB.508823.60  | hypothetical protein, conserved                             | 0,02888 | 0,85   |
| TcCLB.507911.15  | retrotransposon hot spot protein (RHS, pseudogene), puta    | 0,02878 | 0,9073 |
| TcCLB.511491.90  | hypothetical protein                                        | 0,0287  | 0,8521 |
| TcCLB.507641.150 | hypothetical protein, conserved                             | 0,02864 | 0,7675 |
| TcCLB.511385.110 | hypothetical protein                                        | 0,02856 | 0,8664 |
| TcCLB.507515.30  | hypothetical protein, conserved                             | 0,0285  | 0,8831 |
| TcCLB.511439.120 | aminopeptidase, putative                                    | 0,02845 | 0,7779 |
| TcCLB.506809.5   | retrotransposon hot spot (RHS) protein, putative            | 0,02838 | 0,9334 |
| TcCLB.510437.45  | hypothetical protein                                        | 0,02822 | 0,8686 |
| TcCLB.507669.104 | transcription elongation factor, putative                   | 0,02817 | 0,8289 |
| TcCLB.506357.90  | DNA-directed RNA polymerase II/III subunit, putative        | 0,02813 | 0,8417 |
| TcCLB.504193.30  | retrotransposon hot spot protein (RHS, pseudogene), puta    | 0,02804 | 0,8189 |
| TcCLB.510629.450 | hypothetical protein, conserved                             | 0,02795 | 0,8466 |
| TcCLB.510513.20  | hypothetical protein, conserved                             | 0,02784 | 0,8263 |
| TcCLB.504037.40  | hypothetical protein, conserved                             | 0,02781 | 0,8901 |
| TcCLB.509683.20  | hypothetical protein, conserved                             | 0,0277  | 0,808  |
| TcCLB.509105.80  | hypothetical protein, conserved                             | 0,02745 | 0,8543 |
| TcCLB.508409.190 | hypothetical protein, conserved                             | 0,02745 | 0,8919 |
| TcCLB.507081.30  | translation elongation factor EF-2, putative                | 0,02734 | 0,8039 |
| TcCLB.506215.19  | intraflagellar transport protein 140, putative (IFT140)     | 0,02728 | 0,7504 |
| TcCLB.510043.40  | hypothetical protein, conserved                             | 0,02719 | 0,8275 |
| TcCLB.503971.59  | hypothetical protein, conserved (fragment)                  | 0,02719 | 0,8604 |
| TcCLB.509157.230 | hypothetical protein, conserved                             | 0,02714 | 0,8031 |
| TcCLB.510601.10  | hypothetical protein, conserved                             | 0,02713 | 0,9033 |
| TcCLB.511417.129 | hypothetical protein, conserved                             | 0,0271  | 0,9368 |
| TcCLB.511907.250 | hypothetical protein                                        | 0,02699 | 0,7936 |
| TcCLB.508781.40  | hypothetical protein, conserved                             | 0,02688 | 0,8292 |
| TcCLB.510551.15  | hypothetical protein                                        | 0,02675 | 0,9298 |
| TcCLB.504147.10  | hypothetical protein, conserved                             | 0,02671 | 0,8038 |
| TcCLB.509757.10  | hypothetical protein, conserved                             | 0,02662 | 0,8425 |
| TcCLB.506145.50  | hypothetical protein, conserved                             | 0,02653 | 0,9106 |
| TcCLB.511255.160 | trans-sialidase (pseudogene), putative                      | 0,02646 | 0,9452 |
| TcCLB.510579.30  | hypothetical protein, conserved                             | 0,02644 | 0,7841 |
| TcCLB.504003.80  | hypothetical protein, conserved                             | 0,02643 | 0,9155 |

|                  |                                                          |         |        |
|------------------|----------------------------------------------------------|---------|--------|
| TcCLB.503809.50  | hypothetical protein, conserved                          | 0,02621 | 0,8813 |
| TcCLB.508879.180 | hypothetical protein, conserved                          | 0,02616 | 0,8769 |
| TcCLB.508637.70  | RNA helicase, putative                                   | 0,02604 | 0,8156 |
| TcCLB.508999.10  | DnaJ chaperone protein, putative                         | 0,02556 | 0,8211 |
| TcCLB.510747.26  | hypothetical protein, conserved                          | 0,02544 | 0,914  |
| TcCLB.509317.50  | Asparagine-linked glycosylation protein 12 (ALG12)       | 0,02535 | 0,8454 |
| TcCLB.508729.9   | hypothetical protein, conserved                          | 0,02511 | 0,9058 |
| TcCLB.507017.100 | hypothetical protein, conserved                          | 0,02501 | 0,8961 |
| TcCLB.506217.30  | hypothetical protein                                     | 0,02501 | 0,9299 |
| TcCLB.508731.50  | dynein light chain Tctex-type, putative                  | 0,02495 | 0,8798 |
| TcCLB.508917.30  | kinesin, putative                                        | 0,02479 | 0,8254 |
| TcCLB.508771.60  | retrotransposon hot spot protein (RHS, pseudogene), puta | 0,02478 | 0,8562 |
| TcCLB.509797.50  | hypothetical protein, conserved                          | 0,02473 | 0,8732 |
| TcCLB.503971.40  | translation initiation factor 2 subunit, putative        | 0,02466 | 0,8732 |
| TcCLB.511761.40  | hypothetical protein, conserved                          | 0,02466 | 0,934  |
| TcCLB.511293.30  | DNA-directed RNA polymerases I and III subunit RPAC1, p  | 0,02447 | 0,862  |
| TcCLB.509775.9   | protein kinase, putative (fragment)                      | 0,02438 | 0,896  |
| TcCLB.506925.210 | hypothetical protein, conserved                          | 0,02426 | 0,9066 |
| TcCLB.507011.50  | Pre-rRNA-processing protein PNO1, putative (PNO1)        | 0,02425 | 0,8612 |
| TcCLB.506483.69  | mitogen activated protein kinase 4, putative (MPK4)      | 0,02406 | 0,8787 |
| TcCLB.506805.20  | hypothetical protein                                     | 0,02399 | 0,9447 |
| TcCLB.503955.100 | protein kinase, putative                                 | 0,02391 | 0,8401 |
| TcCLB.504643.30  | ubiquitin-conjugating enzyme E2, putative                | 0,02381 | 0,8222 |
| TcCLB.510719.130 | hypothetical protein, conserved                          | 0,02377 | 0,8587 |
| TcCLB.504251.30  | hypothetical protein, conserved                          | 0,02376 | 0,8461 |
| TcCLB.506999.110 | hypothetical protein, conserved                          | 0,02366 | 0,8261 |
| TcCLB.507989.40  | ATP-dependent DEAD/H DNA helicase recQ, putative         | 0,02358 | 0,8114 |
| TcCLB.510731.50  | small nuclear RNA gene activation protein (SNAP) 50, put | 0,02357 | 0,8316 |
| TcCLB.503869.50  | exosome-associated protein 1, putative (EAP1)            | 0,02355 | 0,8514 |
| TcCLB.507797.18  | serine/threonine protein kinase, putative                | 0,02353 | 0,8879 |
| TcCLB.510687.70  | hypothetical protein, conserved                          | 0,02346 | 0,8927 |
| TcCLB.509747.50  | hypothetical protein, conserved                          | 0,02319 | 0,8481 |
| TcCLB.509805.50  | hypothetical protein, conserved                          | 0,02319 | 0,8862 |
| TcCLB.511211.230 | hypothetical protein, conserved                          | 0,02318 | 0,8425 |
| TcCLB.506227.120 | hypothetical protein, conserved                          | 0,02317 | 0,8602 |
| TcCLB.508909.250 | hypothetical protein, conserved                          | 0,02315 | 0,8601 |
| TcCLB.509111.10  | hypothetical protein, conserved                          | 0,02291 | 0,862  |
| TcCLB.509895.50  | hypothetical protein, conserved                          | 0,02274 | 0,8277 |
| TcCLB.509789.50  | rab-like GTPase activating protein, putative             | 0,02273 | 0,8617 |
| TcCLB.503955.30  | hypothetical protein, conserved                          | 0,02258 | 0,8679 |
| TcCLB.503421.7   | N-acetyltransferase complex ARD1 subunit (pseudogene),   | 0,02251 | 0,9436 |
| TcCLB.507729.41  | elongation factor 1-gamma (EF-1-gamma, pseudogene),      | 0,02236 | 0,9575 |
| TcCLB.508117.10  | surface protease GP63 (pseudogene), putative             | 0,02225 | 0,9182 |
| TcCLB.509707.20  | hypothetical protein, conserved                          | 0,02222 | 0,812  |
| TcCLB.504105.70  | hypothetical protein, conserved                          | 0,02214 | 0,8682 |

|                  |                                                          |         |        |
|------------------|----------------------------------------------------------|---------|--------|
| TcCLB.504431.109 | cytochrome b5, putative                                  | 0,02207 | 0,8906 |
| TcCLB.510311.70  | 26S protease regulatory subunit, putative                | 0,02199 | 0,8375 |
| TcCLB.510289.20  | hypothetical protein, conserved                          | 0,02191 | 0,844  |
| TcCLB.510013.270 | trans-sialidase (pseudogene), putative                   | 0,02185 | 0,9211 |
| TcCLB.506247.400 | hypothetical protein, conserved                          | 0,02172 | 0,889  |
| TcCLB.506401.300 | hypothetical protein, conserved                          | 0,02163 | 0,8717 |
| TcCLB.506401.130 | hypothetical protein, conserved                          | 0,02157 | 0,8742 |
| TcCLB.504703.10  | glycosyl hydrolase (pseudogene), putative                | 0,0215  | 0,8378 |
| TcCLB.506195.280 | hypothetical protein, conserved                          | 0,02141 | 0,8237 |
| TcCLB.509733.134 | hypothetical protein, conserved                          | 0,02138 | 0,914  |
| TcCLB.509575.30  | hypothetical protein, conserved                          | 0,0213  | 0,8727 |
| TcCLB.504153.280 | hypothetical protein, conserved                          | 0,02106 | 0,8952 |
| TcCLB.508909.240 | hypothetical protein, conserved                          | 0,021   | 0,8672 |
| TcCLB.506357.29  | dynein light chain Tctex-type, putative                  | 0,02086 | 0,9088 |
| TcCLB.510943.23  | hypothetical protein, conserved                          | 0,0208  | 0,8819 |
| TcCLB.507801.140 | TPR-repeat protein, putative                             | 0,02074 | 0,8709 |
| TcCLB.506327.10  | proteasome subunit alpha type-1, putative (fragment) (PS | 0,02059 | 0,8937 |
| TcCLB.506543.20  | hypothetical protein, conserved                          | 0,02053 | 0,8399 |
| TcCLB.509965.10  | hypothetical protein, conserved (pseudogene)             | 0,02048 | 0,8885 |
| TcCLB.506373.30  | retrotransposon hot spot protein (RHS, pseudogene), puta | 0,02035 | 0,901  |
| TcCLB.508899.40  | hypothetical protein, conserved                          | 0,02015 | 0,8476 |
| TcCLB.510741.124 | hypothetical protein, conserved                          | 0,02015 | 0,8899 |
| TcCLB.510769.140 | hypothetical protein, conserved                          | 0,01997 | 0,8908 |
| TcCLB.510121.40  | hypothetical protein                                     | 0,01995 | 0,8979 |
| TcCLB.509897.250 | retrotransposon hot spot protein (RHS, pseudogene), puta | 0,01971 | 0,9011 |
| TcCLB.509115.41  | elongation factor 1-gamma (EF-1-gamma, pseudogene),      | 0,01959 | 0,9298 |
| TcCLB.509161.10  | ubiquitin-conjugating enzyme E2, putative                | 0,01927 | 0,8804 |
| TcCLB.506163.80  | katanin, putative                                        | 0,01924 | 0,8913 |
| TcCLB.506525.20  | protein transport protein SEC13, putative                | 0,0192  | 0,8938 |
| TcCLB.503593.30  | hypothetical protein, conserved                          | 0,0189  | 0,8802 |
| TcCLB.509007.90  | hypothetical protein                                     | 0,01888 | 0,9069 |
| TcCLB.508827.100 | splicing factor 3B subunit 1, putative                   | 0,01884 | 0,8381 |
| TcCLB.511277.590 | hypothetical protein, conserved                          | 0,01879 | 0,8602 |
| TcCLB.510143.40  | UBX domain-containing protein                            | 0,01875 | 0,8639 |
| TcCLB.511421.100 | Enkuring domain-containig protein                        | 0,01856 | 0,8598 |
| TcCLB.506359.50  | hypothetical protein, conserved                          | 0,01829 | 0,9169 |
| TcCLB.509151.110 | hypothetical protein, conserved                          | 0,01824 | 0,8597 |
| TcCLB.506797.10  | hypothetical protein, conserved                          | 0,01766 | 0,8796 |
| TcCLB.510187.510 | hypothetical protein, conserved                          | 0,01754 | 0,9042 |
| TcCLB.410797.10  | surface protease GP63, putative                          | 0,01751 | 0,9053 |
| TcCLB.507603.180 | ubiquitin hydrolase, putative                            | 0,01749 | 0,8687 |
| TcCLB.507047.60  | hypothetical protein, conserved                          | 0,01748 | 0,9106 |
| TcCLB.509497.9   | hypothetical protein, conserved                          | 0,01739 | 0,916  |
| TcCLB.507083.90  | hypothetical protein, conserved                          | 0,01733 | 0,9142 |
| TcCLB.508201.20  | surface protease GP63 (pseudogene), putative             | 0,01731 | 0,9542 |



|                  |                                                      |         |        |
|------------------|------------------------------------------------------|---------|--------|
| TcCLB.510763.40  | hypothetical protein, conserved                      | 0,01729 | 0,9216 |
| TcCLB.503723.70  | protein farnesyltransferase, putative                | 0,01726 | 0,8923 |
| TcCLB.504797.60  | hypothetical protein, conserved                      | 0,01725 | 0,8847 |
| TcCLB.508411.40  | hypothetical protein, conserved                      | 0,01717 | 0,8998 |
| TcCLB.507039.41  | hypothetical protein, conserved                      | 0,01717 | 0,9282 |
| TcCLB.504147.200 | Regulatory particle triple-A ATPase subunit 6 (RPT6) | 0,01705 | 0,89   |
| TcCLB.511815.80  | 3'a2rel-related protein, putative                    | 0,01705 | 0,916  |
| TcCLB.503985.10  | trans-sialidase (pseudogene), putative               | 0,01694 | 0,945  |
| TcCLB.508647.20  | hypothetical protein                                 | 0,0169  | 0,8729 |
| TcCLB.508461.146 | hypothetical protein, conserved                      | 0,01675 | 0,8967 |
| TcCLB.412509.10  | retrotransposon hot spot (RHS) protein, putative     | 0,01656 | 0,9449 |
| TcCLB.511383.70  | hypothetical protein, conserved                      | 0,01653 | 0,9212 |
| TcCLB.510835.24  | mitochondrial carrier protein, putative              | 0,01649 | 0,9173 |
| TcCLB.506595.70  | trans-sialidase (pseudogene), putative               | 0,01639 | 0,926  |
| TcCLB.504427.140 | hypothetical protein, conserved                      | 0,01633 | 0,9053 |
| TcCLB.508469.4   | hypothetical protein, conserved (fragment)           | 0,0163  | 0,9073 |
| TcCLB.508461.450 | hypothetical protein, conserved                      | 0,0162  | 0,8962 |
| TcCLB.510759.160 | metacaspase 5, putative                              | 0,01618 | 0,8813 |
| TcCLB.506195.270 | hypothetical protein, conserved                      | 0,01617 | 0,8884 |
| TcCLB.511297.20  | anaphase promoting complex subunit 10, putative      | 0,01612 | 0,9277 |
| TcCLB.509777.90  | hypothetical protein, conserved                      | 0,01604 | 0,8947 |
| TcCLB.506811.80  | hypothetical protein, conserved                      | 0,01599 | 0,9087 |
| TcCLB.509671.180 | hypothetical protein, conserved                      | 0,01597 | 0,9216 |
| TcCLB.511725.180 | dynein, putative                                     | 0,01595 | 0,9029 |
| TcCLB.510349.70  | hypothetical protein, conserved                      | 0,0159  | 0,9234 |
| TcCLB.508541.100 | surface protease GP63, putative                      | 0,0158  | 0,964  |
| TcCLB.511751.110 | hypothetical protein, conserved                      | 0,01568 | 0,902  |
| TcCLB.506611.55  | elongation factor 1-gamma (EF-1-gamma, pseudogene),  | 0,01559 | 0,9749 |
| TcCLB.510303.30  | hypothetical protein, conserved                      | 0,01558 | 0,8803 |
| TcCLB.510759.170 | hypothetical protein, conserved                      | 0,01545 | 0,8831 |
| TcCLB.510203.49  | hypothetical protein, conserved (pseudogene)         | 0,01532 | 0,9366 |
| TcCLB.509875.220 | hypothetical protein, conserved                      | 0,0153  | 0,8974 |
| TcCLB.511467.4   | hypothetical protein, conserved                      | 0,0152  | 0,914  |
| TcCLB.508965.90  | hypothetical protein, conserved                      | 0,01494 | 0,8838 |
| TcCLB.510513.60  | hypothetical protein, conserved                      | 0,01489 | 0,9264 |
| TcCLB.506513.100 | hypothetical protein, conserved                      | 0,01485 | 0,8907 |
| TcCLB.511367.90  | hypothetical protein, conserved                      | 0,01483 | 0,8885 |
| TcCLB.508141.30  | hypothetical protein, conserved                      | 0,01475 | 0,9022 |
| TcCLB.508479.300 | hypothetical protein, conserved                      | 0,01474 | 0,9141 |
| TcCLB.460747.30  | hypothetical protein, conserved                      | 0,01474 | 0,9454 |
| TcCLB.507723.70  | hypothetical protein, conserved (pseudogene)         | 0,01467 | 0,889  |
| TcCLB.510187.390 | Protein kinase domain, putative                      | 0,01457 | 0,8997 |
| TcCLB.509717.140 | hypothetical protein, conserved (pseudogene)         | 0,01449 | 0,9524 |
| TcCLB.506367.140 | hypothetical protein, conserved                      | 0,01444 | 0,9087 |
| TcCLB.509127.80  | hypothetical protein, conserved                      | 0,01442 | 0,9379 |

|                  |                                                              |         |        |
|------------------|--------------------------------------------------------------|---------|--------|
| TcCLB.508061.50  | dispersed gene family protein 1 (DGF-1), putative            | 0,01437 | 0,9195 |
| TcCLB.508815.110 | serine/threonine protein phosphatase catalytic subunit, pi   | 0,01436 | 0,8884 |
| TcCLB.510901.30  | hypothetical protein, conserved                              | 0,01432 | 0,9191 |
| TcCLB.509669.90  | hypothetical protein, conserved                              | 0,01429 | 0,9153 |
| TcCLB.510359.230 | hypothetical protein, conserved                              | 0,01404 | 0,9003 |
| TcCLB.509161.40  | centrin, putative                                            | 0,01397 | 0,9288 |
| TcCLB.510165.10  | heat shock protein DNAJ, putative                            | 0,01394 | 0,916  |
| TcCLB.511001.170 | hypothetical protein, conserved                              | 0,01388 | 0,8906 |
| TcCLB.507023.220 | hypothetical protein, conserved                              | 0,01386 | 0,8984 |
| TcCLB.507811.60  | vesicle-associated membrane protein, putative                | 0,01378 | 0,9159 |
| TcCLB.508299.30  | hypothetical protein                                         | 0,01374 | 0,8879 |
| TcCLB.503919.10  | spliced leader RNA PSE-promoter transcription factor, put    | 0,01373 | 0,9134 |
| TcCLB.509171.100 | hypothetical protein, conserved                              | 0,01358 | 0,9098 |
| TcCLB.503979.10  | ethanolamine phosphotransferase, putative (fragment)         | 0,01358 | 0,9118 |
| TcCLB.506127.80  | molybdopterin synthase sulphurylase-like protein, putative   | 0,0135  | 0,9147 |
| TcCLB.509265.23  | N-acetyltransferase complex ARD1 subunit (pseudogene),       | 0,01337 | 0,9636 |
| TcCLB.507083.109 | hypothetical protein, conserved (fragment)                   | 0,01325 | 0,902  |
| TcCLB.509429.270 | proteasome regulatory ATPase subunit 3, putative             | 0,01324 | 0,889  |
| TcCLB.510773.9   | hypothetical protein, conserved (fragment)                   | 0,01322 | 0,9457 |
| TcCLB.508397.60  | methyltransferase, putative                                  | 0,01321 | 0,9397 |
| TcCLB.509965.130 | hypothetical protein, conserved                              | 0,01318 | 0,9458 |
| TcCLB.409101.9   | hypothetical protein, conserved (fragment)                   | 0,01312 | 0,9496 |
| TcCLB.508355.10  | hypothetical protein, conserved                              | 0,01304 | 0,9298 |
| TcCLB.506221.60  | hypothetical protein, conserved (pseudogene)                 | 0,01301 | 0,9032 |
| TcCLB.506871.90  | hypothetical protein, conserved                              | 0,01295 | 0,8979 |
| TcCLB.508741.90  | hypothetical protein                                         | 0,01293 | 0,9202 |
| TcCLB.504103.109 | hypothetical protein, conserved                              | 0,01288 | 0,9364 |
| TcCLB.506557.30  | hypothetical protein, conserved                              | 0,01282 | 0,9139 |
| TcCLB.507851.30  | hypothetical protein, conserved                              | 0,01281 | 0,9023 |
| TcCLB.507839.35  | trans-sialidase, putative                                    | 0,01274 | 0,9608 |
| TcCLB.511895.50  | hypothetical protein, conserved                              | 0,01273 | 0,909  |
| TcCLB.508329.9   | potassium voltage-gated channel, putative                    | 0,01268 | 0,9737 |
| TcCLB.506587.80  | hypothetical protein, conserved                              | 0,01267 | 0,9218 |
| TcCLB.504147.330 | hypothetical protein, conserved                              | 0,01265 | 0,8764 |
| TcCLB.506177.10  | hypothetical protein, conserved                              | 0,01264 | 0,9245 |
| TcCLB.510879.90  | hypothetical protein, conserved                              | 0,01239 | 0,941  |
| TcCLB.510763.90  | hypothetical protein, conserved                              | 0,01233 | 0,9424 |
| TcCLB.506705.30  | hypothetical protein, conserved                              | 0,0123  | 0,9434 |
| TcCLB.411059.18  | clathrin heavy chain, putative                               | 0,01222 | 0,9407 |
| TcCLB.507711.235 | deoxyribodipyrimidine photo-lyase, putative                  | 0,01215 | 0,9339 |
| TcCLB.506211.20  | hypothetical protein, conserved                              | 0,01212 | 0,9319 |
| TcCLB.510509.9   | inositol 1,4,5-trisphosphate receptor, putative (fragment)   | 0,01203 | 0,9298 |
| TcCLB.510901.200 | differentiation inhibitory kinase, putative (ZFK)            | 0,01198 | 0,9087 |
| TcCLB.463269.10  | eukaryotic translation initiation factor 1A, putative (fragm | 0,01193 | 0,9693 |
| TcCLB.505941.40  | hypothetical protein, conserved                              | 0,01184 | 0,9394 |

|                   |                                                              |          |        |
|-------------------|--------------------------------------------------------------|----------|--------|
| TcCLB.507923.20   | U3 small nuclear ribonucleoprotein (snRNP), putative         | 0,0118   | 0,9033 |
| TcCLB.507229.25   | trans-sialidase (pseudogene), putative                       | 0,01174  | 0,9383 |
| TcCLB.506667.110  | trans-sialidase (pseudogene), putative                       | 0,01173  | 0,9645 |
| TcCLB.508043.40   | kinesin, putative                                            | 0,01163  | 0,9106 |
| TcCLB.506585.90   | RNA processing endonuclease 1, putative                      | 0,01147  | 0,9337 |
| TcCLB.434931.20   | hypothetical protein, conserved                              | 0,01144  | 0,9407 |
| TcCLB.506275.90   | hypothetical protein, conserved                              | 0,0113   | 0,9364 |
| TcCLB.507359.30   | hypothetical protein, conserved (pseudogene)                 | 0,0112   | 0,9846 |
| TcCLB.511181.70   | hypothetical protein, conserved                              | 0,01113  | 0,9468 |
| TcCLB.507787.30   | hypothetical protein, conserved                              | 0,01113  | 0,9555 |
| TcCLB.479379.9    | dynein heavy chain, putative                                 | 0,01093  | 0,9212 |
| TcCLB.508641.220  | UDP-Gal or UDP-GlcNAc-dependent glycosyltransferase, p       | 0,01093  | 0,9469 |
| TcCLB.511145.30   | hypothetical protein, conserved                              | 0,01079  | 0,9298 |
| TcCLB.508741.260  | hypothetical protein, conserved                              | 0,01062  | 0,9311 |
| TcCLB.509135.9    | hypothetical protein (fragment)                              | 0,01061  | 0,9564 |
| TcCLB.508141.70   | Kinesin-13 4, putative (KIN13-4)                             | 0,01047  | 0,9462 |
| TcCLB.511521.20   | hypothetical protein, conserved                              | 0,01042  | 0,943  |
| TcCLB.509795.30   | hypothetical protein, conserved                              | 0,01038  | 0,9327 |
| TcCLB.510989.50   | hypothetical protein, conserved                              | 0,01021  | 0,9091 |
| TcCLB.508027.30   | hypothetical protein, conserved                              | 0,01017  | 0,949  |
| TcCLB.510187.448  | hypothetical protein, conserved                              | 0,01016  | 0,9169 |
| TcCLB.506649.10   | hypothetical protein                                         | 0,01006  | 0,9468 |
| TcCLB.508385.60   | hypothetical protein, conserved                              | 0,009891 | 0,9491 |
| TcCLB.510607.29   | dispersed gene family protein 1 (DGF-1), putative (fragme    | 0,009885 | 0,9675 |
| TcCLB.509693.130  | hypothetical protein                                         | 0,009875 | 0,9447 |
| TcCLB.505997.174  | dispersed gene family protein 1 (DGF-1), putative            | 0,009789 | 0,9628 |
| TcCLB.511123.20   | retrotransposon hot spot protein (RHS, pseudogene), puta     | 0,009625 | 0,9542 |
| TcCLB.506539.21   | hypothetical protein, conserved (pseudogene)                 | 0,009497 | 0,9731 |
| TcCLB.507795.60   | tryptophanyl-tRNA synthetase (pseudogene), putative          | 0,00947  | 0,9436 |
| TcCLB.508153.1110 | arginine N-methyltransferase, putative                       | 0,009304 | 0,9452 |
| TcCLB.506591.69   | hypothetical protein, conserved                              | 0,009205 | 0,9391 |
| TcCLB.503611.10   | nucleoplasmin-like protein (NLP), putative                   | 0,009075 | 0,9442 |
| TcCLB.509961.20   | dispersed gene family protein 1 (DGF-1), putative            | 0,009073 | 0,9813 |
| TcCLB.508461.234  | hypothetical protein, conserved                              | 0,009006 | 0,9576 |
| TcCLB.506195.220  | hypothetical protein, conserved                              | 0,008986 | 0,9558 |
| TcCLB.506735.70   | hypothetical protein, conserved                              | 0,008909 | 0,929  |
| TcCLB.508897.70   | ADP-ribosylation factor family, putative                     | 0,008785 | 0,9543 |
| TcCLB.511003.221  | cleavage and polyadenylation specificity factor, putative (i | 0,00852  | 0,942  |
| TcCLB.507611.380  | hypothetical protein                                         | 0,008493 | 0,9508 |
| TcCLB.511653.50   | hypothetical protein, conserved                              | 0,008454 | 0,9537 |
| TcCLB.506573.10   | hypothetical protein, conserved                              | 0,008414 | 0,9421 |
| TcCLB.508307.130  | hypothetical protein, conserved                              | 0,008345 | 0,9459 |
| TcCLB.509569.170  | hypothetical protein                                         | 0,008254 | 0,9363 |
| TcCLB.504109.180  | hypothetical protein, conserved                              | 0,007955 | 0,9696 |
| TcCLB.507875.180  | AGP2beta-2, putative                                         | 0,007834 | 0,9436 |

|                  |                                                          |          |        |
|------------------|----------------------------------------------------------|----------|--------|
| TcCLB.507437.21  | elongation factor 1-gamma (EF-1-gamma, pseudogene),      | 0,007807 | 0,9864 |
| TcCLB.506567.77  | hypothetical protein, conserved (pseudogene)             | 0,007728 | 0,9744 |
| TcCLB.507007.80  | hypothetical protein                                     | 0,007641 | 0,9384 |
| TcCLB.506167.40  | proteasome subunit alpha type-1, putative (PSA1)         | 0,007638 | 0,9576 |
| TcCLB.504003.14  | hypothetical protein, conserved                          | 0,007635 | 0,9585 |
| TcCLB.509601.44  | hypothetical protein, conserved                          | 0,007616 | 0,9399 |
| TcCLB.506503.56  | hypothetical protein, conserved                          | 0,007601 | 0,9561 |
| TcCLB.510595.10  | hypothetical protein                                     | 0,007561 | 0,9523 |
| TcCLB.463673.9   | hypothetical protein, conserved                          | 0,007549 | 0,9625 |
| TcCLB.504153.190 | mitochondrial edited mRNA stability factor 1 subunit     | 0,007467 | 0,944  |
| TcCLB.510175.200 | retrotransposon hot spot protein (RHS, pseudogene), puta | 0,0074   | 0,9743 |
| TcCLB.508369.40  | serine/threonine-protein kinase A (pseudogene), putative | 0,007393 | 0,9537 |
| TcCLB.505101.50  | GMP synthetase (pseudogene), putative                    | 0,007305 | 0,9741 |
| TcCLB.507801.179 | vesicle-associated membrane protein                      | 0,007283 | 0,9544 |
| TcCLB.504153.90  | Cytoplasmic dynein 2 heavy chain (DYNC2H1), putative     | 0,007244 | 0,9256 |
| TcCLB.510755.120 | RNA-binding protein, putative                            | 0,0072   | 0,9502 |
| TcCLB.507777.10  | hypothetical protein, conserved                          | 0,007184 | 0,9645 |
| TcCLB.510363.290 | hypothetical protein                                     | 0,007066 | 0,9945 |
| TcCLB.508145.10  | RNA-binding protein, putative                            | 0,007057 | 0,988  |
| TcCLB.511439.100 | p-nitrophenylphosphatase, putative                       | 0,007024 | 0,9667 |
| TcCLB.510353.30  | paraflagellar rod component par4, putative               | 0,006999 | 0,9544 |
| TcCLB.508461.430 | proteasome beta 2 subunit, putative                      | 0,006982 | 0,9447 |
| TcCLB.511297.10  | hypothetical protein, conserved                          | 0,006953 | 0,9403 |
| TcCLB.511323.30  | hypothetical protein, conserved                          | 0,006953 | 0,9615 |
| TcCLB.506777.90  | hypothetical protein, conserved                          | 0,006901 | 0,9571 |
| TcCLB.510607.80  | dispersed gene family protein 1 (DGF-1), putative        | 0,006747 | 0,9794 |
| TcCLB.506453.20  | mucin TcMUC (pseudogene), putative                       | 0,006673 | 0,9763 |
| TcCLB.510189.51  | elongation factor 1-gamma (EF-1-gamma, pseudogene),      | 0,006499 | 0,9896 |
| TcCLB.510625.140 | elongation factor 1-gamma (EF-1-gamma), putative         | 0,006348 | 0,9644 |
| TcCLB.503423.10  | glycine dehydrogenase [decarboxylating] (pseudogene), p  | 0,006293 | 0,9737 |
| TcCLB.508501.270 | hypothetical protein, conserved                          | 0,00629  | 0,96   |
| TcCLB.507093.72  | hypothetical protein, conserved                          | 0,006151 | 0,954  |
| TcCLB.510603.150 | hypothetical protein, conserved                          | 0,006131 | 0,9696 |
| TcCLB.503719.39  | hypothetical protein, conserved                          | 0,005994 | 0,9716 |
| TcCLB.418221.4   | hypothetical protein, conserved (fragment)               | 0,005819 | 0,97   |
| TcCLB.505977.13  | protein kinase, putative (fragment)                      | 0,005803 | 0,9645 |
| TcCLB.508881.150 | hypothetical protein, conserved                          | 0,005612 | 0,9664 |
| TcCLB.509637.9   | hypothetical protein, conserved                          | 0,00542  | 0,9743 |
| TcCLB.511545.50  | hypothetical protein, conserved                          | 0,005321 | 0,9635 |
| TcCLB.507993.380 | hypothetical protein, conserved                          | 0,005235 | 0,9718 |
| TcCLB.506627.70  | hypothetical protein                                     | 0,005098 | 0,971  |
| TcCLB.508721.4   | hypothetical protein, conserved                          | 0,005031 | 0,9784 |
| TcCLB.509767.180 | exosome component CSL4, putative (CSL4)                  | 0,00497  | 0,982  |
| TcCLB.509985.60  | hypothetical protein, conserved                          | 0,004825 | 0,9636 |
| TcCLB.506505.50  | hypothetical protein, conserved                          | 0,00477  | 0,9644 |

|                  |                                                         |           |        |
|------------------|---------------------------------------------------------|-----------|--------|
| TcCLB.509837.30  | hypothetical protein                                    | 0,004694  | 0,978  |
| TcCLB.510099.40  | hypothetical protein, conserved                         | 0,004609  | 0,9734 |
| TcCLB.507727.19  | hypothetical protein                                    | 0,004427  | 0,9876 |
| TcCLB.504105.240 | hypothetical protein, conserved                         | 0,004372  | 0,9668 |
| TcCLB.504097.10  | RNA editing complex protein MP61, putative              | 0,004303  | 0,9732 |
| TcCLB.510715.120 | mucin TcMUCII, putative                                 | 0,004294  | 0,9884 |
| TcCLB.507305.11  | casein kinase (pseudogene), putative                    | 0,004201  | 0,9611 |
| TcCLB.509231.5   | hypothetical protein, conserved (fragment)              | 0,004146  | 0,9938 |
| TcCLB.510663.57  | transport protein particle (TRAPP) subunit, putative    | 0,004052  | 0,9794 |
| TcCLB.509539.40  | hypothetical protein, conserved                         | 0,004029  | 0,9868 |
| TcCLB.511467.20  | hypothetical protein, conserved                         | 0,004     | 0,9581 |
| TcCLB.504105.60  | hypothetical protein, conserved                         | 0,003961  | 0,9752 |
| TcCLB.504089.40  | long-chain-fatty-acid-CoA ligase, putative              | 0,003955  | 0,9718 |
| TcCLB.508355.370 | hypothetical protein, conserved                         | 0,003955  | 0,9795 |
| TcCLB.508641.100 | hypothetical protein, conserved                         | 0,003895  | 0,9754 |
| TcCLB.507053.209 | Cytoplasmic dynein 2 heavy chain (DYNC2H1), putative    | 0,003814  | 0,9717 |
| TcCLB.511715.50  | hypothetical protein, conserved (pseudogene)            | 0,003737  | 0,9819 |
| TcCLB.509885.64  | hypothetical protein, conserved                         | 0,003685  | 0,9876 |
| TcCLB.509803.10  | hypothetical protein                                    | 0,003684  | 0,9867 |
| TcCLB.511431.90  | conserved protein, unknown function                     | 0,003658  | 0,9913 |
| TcCLB.511283.20  | protein transport protein SEC13, putative               | 0,003478  | 0,9819 |
| TcCLB.508867.9   | kinesin, putative (fragment)                            | 0,003455  | 0,9896 |
| TcCLB.511143.30  | hypothetical protein, conserved                         | 0,00324   | 0,9826 |
| TcCLB.510603.110 | hypothetical protein, conserved                         | 0,003147  | 0,988  |
| TcCLB.509769.10  | hypothetical protein, conserved                         | 0,00299   | 0,9894 |
| TcCLB.507093.170 | hypothetical protein, conserved                         | 0,002923  | 0,9747 |
| TcCLB.507057.40  | hypothetical protein, conserved                         | 0,002764  | 0,9883 |
| TcCLB.508747.10  | hypothetical protein                                    | 0,002376  | 0,9972 |
| TcCLB.440099.19  | hypothetical protein, conserved                         | 0,002315  | 0,9889 |
| TcCLB.506925.410 | ATPase, putative                                        | 0,002274  | 0,9877 |
| TcCLB.508325.320 | protein kinase, putative                                | 0,002017  | 0,9931 |
| TcCLB.510121.100 | hypothetical protein                                    | 0,001893  | 0,9938 |
| TcCLB.504769.60  | hypothetical protein, conserved                         | 0,001846  | 0,9925 |
| TcCLB.505183.10  | hypothetical protein, conserved                         | 0,001804  | 0,9896 |
| TcCLB.506155.90  | hypothetical protein, conserved (pseudogene)            | 0,001693  | 0,9872 |
| TcCLB.506765.43  | hypothetical protein                                    | 0,001641  | 0,9942 |
| TcCLB.503809.20  | peroxin 12, putative (PEX12)                            | 0,001513  | 0,9924 |
| TcCLB.507963.90  | hypothetical protein, conserved                         | 0,001463  | 0,9943 |
| TcCLB.507081.70  | hypothetical protein, conserved                         | 0,001419  | 0,9913 |
| TcCLB.508625.40  | hypothetical protein, conserved                         | 0,001338  | 0,9947 |
| TcCLB.511517.90  | hypothetical protein, conserved                         | 0,001315  | 0,9926 |
| TcCLB.509539.44  | hypothetical protein, conserved                         | 0,001177  | 0,9968 |
| TcCLB.506559.540 | hypothetical protein, conserved                         | 0,001042  | 0,9951 |
| TcCLB.508489.20  | hypothetical protein, conserved                         | 0,0009611 | 0,995  |
| TcCLB.509203.79  | guanine-nucleotide-exchange-factor, putative (fragment) | 0,0009089 | 0,9963 |

|                  |                                                          |             |        |
|------------------|----------------------------------------------------------|-------------|--------|
| TcCLB.506701.10  | dihydrolipoamide dehydrogenase, putative (GCVL-1)        | 0,000906    | 0,9967 |
| TcCLB.511301.170 | retrotransposon hot spot (RHS) protein, putative         | 0,0008683   | 0,9956 |
| TcCLB.508693.190 | hypothetical protein, conserved                          | 0,0008563   | 0,9943 |
| TcCLB.506241.200 | hypothetical protein, conserved                          | 0,0008091   | 0,9945 |
| TcCLB.507001.30  | ankyrin repeat protein, putative                         | 0,000793    | 0,997  |
| TcCLB.508111.40  | hypothetical protein, conserved                          | 0,0007824   | 0,995  |
| TcCLB.503897.50  | hypothetical protein, conserved                          | 0,0006871   | 0,9961 |
| TcCLB.511423.70  | glycerol-3-phosphate dehydrogenase (FAD-dependent), pu   | 0,0006447   | 0,9967 |
| TcCLB.508179.40  | hypothetical protein, conserved                          | 0,0005822   | 0,9966 |
| TcCLB.506503.110 | DNA-directed RNA polymerases I and III subunit RPAC1, p  | 0,0004871   | 0,9973 |
| TcCLB.508257.90  | hypothetical protein, conserved                          | 0,000363    | 0,9977 |
| TcCLB.506275.40  | hypothetical protein, conserved                          | 0,0003497   | 0,9977 |
| TcCLB.508851.79  | hypothetical protein, conserved                          | 0,00034     | 0,9982 |
| TcCLB.506723.30  | hypothetical protein                                     | 0,000336    | 0,9989 |
| TcCLB.511725.160 | hypothetical protein, conserved                          | 0,0003285   | 0,9973 |
| TcCLB.506867.40  | surface protease GP63, putative                          | 0,0001145   | 0,9993 |
| TcCLB.510661.100 | hypothetical protein                                     | 0,0001061   | 0,9993 |
| TcCLB.511317.20  | hypothetical protein, conserved                          | 0,00003341  | 0,9997 |
| TcCLB.503651.10  | hypothetical protein, conserved                          | -0,00008295 | 0,9994 |
| TcCLB.509287.5   | hypothetical protein, conserved (pseudogene)             | -0,0001935  | 0,9993 |
| TcCLB.509671.84  | hypothetical protein, conserved                          | -0,0002906  | 0,9984 |
| TcCLB.506343.51  | retrotransposon hot spot protein (RHS, pseudogene), puta | -0,0003047  | 0,999  |
| TcCLB.509719.9   | N-acetyltransferase complex ARD1 subunit, putative (frag | -0,0003199  | 0,999  |
| TcCLB.508405.90  | soluble N-ethylmaleimide sensitive factor (NSF) attachm  | -0,0003654  | 0,9982 |
| TcCLB.507047.160 | hypothetical protein, conserved                          | -0,00042    | 0,9985 |
| TcCLB.510187.394 | hypothetical protein, conserved                          | -0,0004897  | 0,9973 |
| TcCLB.511903.60  | hypothetical protein, conserved                          | -0,000529   | 0,9977 |
| TcCLB.510137.10  | trans-sialidase (pseudogene), putative                   | -0,0005756  | 0,998  |
| TcCLB.508277.350 | cation transporter, putative                             | -0,0006266  | 0,9951 |
| TcCLB.509229.20  | hypothetical protein, conserved                          | -0,0006726  | 0,9951 |
| TcCLB.507509.30  | RNA polymerase-like protein, putative                    | -0,0007335  | 0,9968 |
| TcCLB.507481.20  | retrotransposon hot spot protein (RHS, pseudogene), puta | -0,0007716  | 0,997  |
| TcCLB.511215.14  | hypothetical protein, conserved                          | -0,0008527  | 0,9955 |
| TcCLB.510303.100 | hypothetical protein, conserved                          | -0,0009058  | 0,9947 |
| TcCLB.503999.50  | ubiquitin-conjugating enzyme, putative                   | -0,001025   | 0,9942 |
| TcCLB.506727.30  | hypothetical protein, conserved                          | -0,00106    | 0,995  |
| TcCLB.511239.10  | hypothetical protein, conserved                          | -0,001146   | 0,9945 |
| TcCLB.509793.30  | kinetoplast DNA-associated protein, putative             | -0,001169   | 0,9945 |
| TcCLB.509427.60  | trans-sialidase (pseudogene), putative                   | -0,001192   | 0,9963 |
| TcCLB.503479.70  | bilobe protein, conserved                                | -0,001212   | 0,9899 |
| TcCLB.430605.10  | hypothetical protein, conserved                          | -0,001227   | 0,9914 |
| TcCLB.503819.10  | hypothetical protein, conserved                          | -0,00127    | 0,9938 |
| TcCLB.511621.244 | hypothetical protein, conserved                          | -0,001365   | 0,995  |
| TcCLB.508919.60  | ADP-ribosylation factor, putative (ARL-1)                | -0,001551   | 0,993  |
| TcCLB.506559.490 | hypothetical protein, conserved                          | -0,001585   | 0,9945 |

|                  |                                                                |           |        |
|------------------|----------------------------------------------------------------|-----------|--------|
| TcCLB.511537.40  | protein phosphatase 2A catalytic subunit, putative             | -0,001749 | 0,9891 |
| TcCLB.505989.100 | hypothetical protein, conserved                                | -0,001759 | 0,9912 |
| TcCLB.507007.9   | hypothetical protein, conserved (pseudogene)                   | -0,001817 | 0,9888 |
| TcCLB.509791.160 | hypothetical protein, conserved                                | -0,001824 | 0,9864 |
| TcCLB.503973.250 | mucin TcMUCII (pseudogene), putative                           | -0,001945 | 0,995  |
| TcCLB.434945.4   | ADP-ribosylation factor, putative                              | -0,002005 | 0,9885 |
| TcCLB.508547.130 | NUDIX family hydrolase, putative                               | -0,002085 | 0,9896 |
| TcCLB.510105.180 | hypothetical protein, conserved                                | -0,002096 | 0,9868 |
| TcCLB.504035.140 | mismatch repair protein MLH1, putative                         | -0,00213  | 0,9881 |
| TcCLB.508355.320 | arginyl-tRNA synthetase, putative                              | -0,002156 | 0,9851 |
| TcCLB.506479.74  | Quinonprotein alcohol dehydrogenase-like protein, putative     | -0,002174 | 0,9868 |
| TcCLB.506475.130 | hypothetical protein, conserved                                | -0,002183 | 0,9851 |
| TcCLB.507089.180 | hypothetical protein, conserved                                | -0,002226 | 0,986  |
| TcCLB.503639.30  | hypothetical protein, conserved                                | -0,002293 | 0,9884 |
| TcCLB.511589.230 | eukaryotic translation initiation factor 3 subunit 2, putative | -0,002318 | 0,9837 |
| TcCLB.508859.100 | hypothetical protein, conserved                                | -0,002407 | 0,9894 |
| TcCLB.509647.40  | hypothetical protein, conserved                                | -0,002485 | 0,987  |
| TcCLB.509609.10  | hypothetical protein, conserved                                | -0,002505 | 0,9883 |
| TcCLB.506195.50  | hypothetical protein, conserved                                | -0,002527 | 0,9891 |
| TcCLB.511273.10  | dispersed gene family protein 1 (DGF-1, pseudogene), putative  | -0,002693 | 0,995  |
| TcCLB.508999.269 | hypothetical protein, conserved (fragment)                     | -0,002698 | 0,988  |
| TcCLB.506973.14  | mucin TcMUCII (pseudogene), putative                           | -0,002764 | 0,9914 |
| TcCLB.509987.10  | hypothetical protein, conserved                                | -0,003474 | 0,9837 |
| TcCLB.509749.39  | short-chain dehydrogenase, putative                            | -0,003494 | 0,993  |
| TcCLB.509205.30  | eukaryotic translation initiation factor, putative             | -0,003579 | 0,9782 |
| TcCLB.508055.25  | hypothetical protein                                           | -0,003601 | 0,9932 |
| TcCLB.511821.70  | hypothetical protein, conserved                                | -0,003649 | 0,9807 |
| TcCLB.508461.19  | hypothetical protein, conserved                                | -0,003678 | 0,9823 |
| TcCLB.503689.40  | hypothetical protein, conserved                                | -0,003715 | 0,9721 |
| TcCLB.511293.40  | U3 snoRNA-associated protein UTP11, putative                   | -0,003759 | 0,9785 |
| TcCLB.508699.10  | DNA topoisomerase II, putative                                 | -0,003773 | 0,969  |
| TcCLB.506679.30  | hypothetical protein, conserved                                | -0,003787 | 0,9696 |
| TcCLB.506683.190 | trans-sialidase, Group II, putative                            | -0,003791 | 0,9836 |
| TcCLB.506605.10  | hypothetical protein, conserved                                | -0,003794 | 0,9849 |
| TcCLB.503505.14  | PTP1-interacting protein, 39 kDa, putative                     | -0,003806 | 0,9831 |
| TcCLB.510131.10  | hypothetical protein, conserved                                | -0,003876 | 0,9743 |
| TcCLB.510265.14  | hypothetical protein, conserved                                | -0,003905 | 0,9823 |
| TcCLB.510741.40  | hypothetical protein, conserved                                | -0,00401  | 0,9686 |
| TcCLB.507671.39  | serine/threonine-protein phosphatase PP1                       | -0,004045 | 0,9851 |
| TcCLB.509561.120 | deaminase, putative                                            | -0,004375 | 0,9818 |
| TcCLB.503823.10  | phosphoglycerate mutase family member 5, putative              | -0,004473 | 0,9825 |
| TcCLB.507951.140 | U2 small nuclear ribonucleoprotein B, putative                 | -0,004491 | 0,9861 |
| TcCLB.508833.10  | hypothetical protein                                           | -0,004492 | 0,9835 |
| TcCLB.507747.230 | acid phosphatase type 5, putative                              | -0,00461  | 0,9752 |
| TcCLB.511633.10  | hypothetical protein, conserved                                | -0,00463  | 0,9932 |

|                  |                                                          |           |        |
|------------------|----------------------------------------------------------|-----------|--------|
| TcCLB.509213.10  | hypothetical protein, conserved                          | -0,004698 | 0,9781 |
| TcCLB.509385.19  | retrotransposon hot spot protein (RHS, pseudogene), puta | -0,004818 | 0,9879 |
| TcCLB.510187.240 | hypothetical protein, conserved                          | -0,005055 | 0,9586 |
| TcCLB.510087.10  | hypothetical protein, conserved                          | -0,005109 | 0,9753 |
| TcCLB.507943.80  | hypothetical protein, conserved (pseudogene)             | -0,005193 | 0,9723 |
| TcCLB.511509.21  | hypothetical protein, conserved                          | -0,005419 | 0,9646 |
| TcCLB.508207.80  | Mini-chromosome maintenance complex-binding protein      | -0,005522 | 0,9676 |
| TcCLB.507005.70  | Pre-rRNA-processing protein PNO1, putative (PNO1)        | -0,005735 | 0,9687 |
| TcCLB.509669.110 | GTPase activator protein, putative                       | -0,005739 | 0,9645 |
| TcCLB.508409.320 | hypothetical protein, conserved                          | -0,006065 | 0,9532 |
| TcCLB.510149.100 | hypothetical protein, conserved                          | -0,006069 | 0,9681 |
| TcCLB.509625.10  | ATP-dependent RNA helicase, putative (fragment)          | -0,006142 | 0,9593 |
| TcCLB.510885.30  | hypothetical protein                                     | -0,006164 | 0,958  |
| TcCLB.511003.50  | hypothetical protein, conserved                          | -0,006196 | 0,9547 |
| TcCLB.503847.99  | hypothetical protein, conserved (pseudogene)             | -0,006487 | 0,9736 |
| TcCLB.507491.140 | hypothetical protein, conserved                          | -0,006491 | 0,9629 |
| TcCLB.510517.110 | hypothetical protein                                     | -0,006533 | 0,9763 |
| TcCLB.510315.10  | IAG-nucleoside hydrolase, putative (IAGNH)               | -0,006545 | 0,9562 |
| TcCLB.503953.50  | hypothetical protein, conserved                          | -0,006569 | 0,9562 |
| TcCLB.508543.60  | hypothetical protein, conserved                          | -0,006682 | 0,9605 |
| TcCLB.508403.20  | hypothetical protein, conserved (pseudogene)             | -0,006695 | 0,9571 |
| TcCLB.507031.20  | hypothetical protein, conserved                          | -0,006728 | 0,956  |
| TcCLB.440099.28  | protein kinase, putative                                 | -0,006831 | 0,9702 |
| TcCLB.508587.50  | hypothetical protein                                     | -0,006864 | 0,984  |
| TcCLB.504253.40  | hypothetical protein, conserved                          | -0,007127 | 0,9568 |
| TcCLB.508277.30  | hypothetical protein, conserved                          | -0,007163 | 0,95   |
| TcCLB.509461.90  | inositol 1,4,5-trisphosphate receptor, putative (IP3R)   | -0,007214 | 0,9299 |
| TcCLB.508553.20  | hypothetical protein                                     | -0,007219 | 0,9856 |
| TcCLB.508199.50  | palmitoyl acyltransferase 1, putative                    | -0,00735  | 0,9436 |
| TcCLB.506821.100 | mitochondrial RNA binding complex 1 subunit, putative (R | -0,007363 | 0,9506 |
| TcCLB.510665.40  | DNA-repair protein, putative                             | -0,007403 | 0,943  |
| TcCLB.507023.30  | pseudouridine synthase A-like protein, putative          | -0,007431 | 0,9506 |
| TcCLB.504021.50  | hypothetical protein                                     | -0,00754  | 0,9488 |
| TcCLB.510525.20  | hypothetical protein, conserved                          | -0,00754  | 0,9603 |
| TcCLB.510491.80  | hypothetical protein, conserved                          | -0,007643 | 0,9524 |
| TcCLB.503869.9   | axoneme central apparatus protein, putative              | -0,007694 | 0,9615 |
| TcCLB.511127.70  | hypothetical protein, conserved                          | -0,007791 | 0,948  |
| TcCLB.471901.5   | GDP-mannose 4,6 dehydratase, putative (fragment)         | -0,007837 | 0,9868 |
| TcCLB.507625.80  | hypothetical protein, conserved                          | -0,007839 | 0,9547 |
| TcCLB.506265.100 | ATP-dependent RNA helicase, putative                     | -0,0079   | 0,938  |
| TcCLB.506203.129 | DNA-directed RNA polymerase, mitochondrial (fragment)    | -0,007924 | 0,9408 |
| TcCLB.508461.290 | 4E-interacting protein, putative                         | -0,007967 | 0,9492 |
| TcCLB.511507.24  | hypothetical protein, conserved                          | -0,008081 | 0,9709 |
| TcCLB.510101.20  | phosphatidylinositol-4-phosphate 5-kinase, putative      | -0,008387 | 0,9495 |
| TcCLB.506733.30  | hypothetical protein, conserved                          | -0,008415 | 0,934  |



|                  |                                                           |           |        |
|------------------|-----------------------------------------------------------|-----------|--------|
| TcCLB.507829.19  | Vacuolar protein sorting-associated protein 16 homolog, p | -0,008419 | 0,9699 |
| TcCLB.510101.230 | ATPase (pseudogene), putative                             | -0,008482 | 0,9298 |
| TcCLB.509573.50  | hypothetical protein, conserved                           | -0,008602 | 0,9289 |
| TcCLB.510115.70  | trans-sialidase, putative                                 | -0,008719 | 0,9773 |
| TcCLB.506419.20  | tousled-like kinase II, putative                          | -0,008723 | 0,9492 |
| TcCLB.507159.65  | DNA-directed RNA polymerase subunit, putative             | -0,008787 | 0,9513 |
| TcCLB.506203.30  | SWI/SNF-related matrix-associated actin-dependent regu    | -0,008824 | 0,9375 |
| TcCLB.508073.20  | hypothetical protein                                      | -0,008894 | 0,9539 |
| TcCLB.509349.30  | hypothetical protein                                      | -0,008962 | 0,9746 |
| TcCLB.508775.30  | dispersed gene family protein 1 (DGF-1), putative         | -0,009008 | 0,9764 |
| TcCLB.507583.10  | hypothetical protein, conserved                           | -0,009058 | 0,9737 |
| TcCLB.507037.50  | exonuclease, putative                                     | -0,009087 | 0,9602 |
| TcCLB.508409.250 | hypothetical protein, conserved                           | -0,009142 | 0,9529 |
| TcCLB.507983.10  | dispersed gene family protein 1 (DGF-1), putative (fragm  | -0,009155 | 0,9807 |
| TcCLB.511887.40  | hypothetical protein, conserved                           | -0,009191 | 0,9692 |
| TcCLB.506637.40  | hypothetical protein, conserved                           | -0,009192 | 0,9561 |
| TcCLB.506469.70  | hypothetical protein                                      | -0,009264 | 0,9679 |
| TcCLB.504205.20  | trans-sialidase (pseudogene), putative                    | -0,009268 | 0,9693 |
| TcCLB.511491.120 | hypothetical protein, conserved                           | -0,009335 | 0,9298 |
| TcCLB.509871.31  | ATP-dependent DEAD/H RNA helicase (pseudogene), puta      | -0,009355 | 0,9764 |
| TcCLB.507787.130 | hypothetical protein, conserved                           | -0,009357 | 0,9402 |
| TcCLB.507509.10  | hypothetical protein, conserved (pseudogene)              | -0,009379 | 0,9576 |
| TcCLB.508851.19  | retrotransposon hot spot (RHS) protein, putative          | -0,00938  | 0,9402 |
| TcCLB.509429.220 | dolichyl-P-Man:GDP-Man5GlcNAc2-PP-dolichyl alpha-1,2-1    | -0,009468 | 0,938  |
| TcCLB.509471.10  | hypothetical protein, conserved                           | -0,009616 | 0,9457 |
| TcCLB.511899.50  | Trypanosome basal body component protein (fragment) (     | -0,009787 | 0,9316 |
| TcCLB.510861.50  | hypothetical protein, conserved                           | -0,009892 | 0,9714 |
| TcCLB.503677.29  | hypothetical protein, conserved                           | -0,01008  | 0,9402 |
| TcCLB.509695.80  | hypothetical protein, conserved                           | -0,0101   | 0,9339 |
| TcCLB.511577.30  | hypothetical protein, conserved                           | -0,01014  | 0,9356 |
| TcCLB.510421.170 | hypothetical protein, conserved                           | -0,01016  | 0,9066 |
| TcCLB.505481.10  | hypothetical protein                                      | -0,01022  | 0,9727 |
| TcCLB.508273.60  | hypothetical protein, conserved                           | -0,01035  | 0,9255 |
| TcCLB.511585.125 | hypothetical protein, conserved                           | -0,01044  | 0,9362 |
| TcCLB.510431.260 | hypothetical protein, conserved                           | -0,01044  | 0,9424 |
| TcCLB.510329.140 | hypothetical protein, conserved                           | -0,01049  | 0,9015 |
| TcCLB.503833.30  | peroxin 13, putative (PEX13)                              | -0,01052  | 0,9367 |
| TcCLB.510289.44  | hypothetical protein, conserved                           | -0,01053  | 0,9537 |
| TcCLB.509047.110 | rac serine-threonine kinase, putative                     | -0,01062  | 0,924  |
| TcCLB.510889.80  | protein phosphatase with EF-Hand domains (PPEF)           | -0,01074  | 0,9055 |
| TcCLB.507019.45  | hypothetical protein                                      | -0,01078  | 0,9412 |
| TcCLB.511633.70  | protein kinase, putative                                  | -0,01085  | 0,9214 |
| TcCLB.511283.60  | hypothetical protein, conserved                           | -0,0109   | 0,9288 |
| TcCLB.506413.10  | CDP-DAG synthase, putative (fragment) (CDS)               | -0,01092  | 0,9531 |
| TcCLB.503929.60  | hypothetical protein, conserved                           | -0,01093  | 0,945  |

|                  |                                                          |          |        |
|------------------|----------------------------------------------------------|----------|--------|
| TcCLB.509877.70  | hypothetical protein, conserved                          | -0,01098 | 0,9333 |
| TcCLB.506721.20  | radial spoke protein 3, putative (RSP3)                  | -0,01103 | 0,9216 |
| TcCLB.507673.40  | hypothetical protein, conserved                          | -0,01105 | 0,9148 |
| TcCLB.507739.20  | metallo-peptidase, Clan MA(E) Family M41                 | -0,01105 | 0,921  |
| TcCLB.509029.30  | hypothetical protein, conserved                          | -0,01105 | 0,9486 |
| TcCLB.508579.20  | hypothetical protein, conserved                          | -0,0111  | 0,9642 |
| TcCLB.503493.30  | hypothetical protein, conserved                          | -0,01117 | 0,941  |
| TcCLB.509551.100 | hypothetical protein, conserved                          | -0,01135 | 0,9337 |
| TcCLB.506855.260 | thymidine kinase, putative                               | -0,01135 | 0,9494 |
| TcCLB.510753.20  | hypothetical protein, conserved                          | -0,01158 | 0,9407 |
| TcCLB.509639.20  | hypothetical protein, conserved                          | -0,01158 | 0,9422 |
| TcCLB.511509.5   | hypothetical protein, conserved                          | -0,0116  | 0,9321 |
| TcCLB.504013.50  | selenocysteine-tRNA-specific elongation factor, putative | -0,01162 | 0,925  |
| TcCLB.507771.90  | hypothetical protein, conserved                          | -0,01167 | 0,9006 |
| TcCLB.510243.100 | chloride channel protein, putative                       | -0,01178 | 0,9188 |
| TcCLB.511657.70  | hypothetical protein, conserved                          | -0,01179 | 0,9261 |
| TcCLB.504029.21  | lipase, putative (fragment)                              | -0,01195 | 0,9148 |
| TcCLB.507669.190 | hypothetical protein, conserved                          | -0,01201 | 0,9377 |
| TcCLB.509437.30  | hypothetical protein, conserved                          | -0,01203 | 0,8995 |
| TcCLB.509551.40  | hypothetical protein, conserved                          | -0,01203 | 0,942  |
| TcCLB.448567.9   | dynein heavy chain, putative                             | -0,01205 | 0,9446 |
| TcCLB.511021.20  | hypothetical protein                                     | -0,01207 | 0,9497 |
| TcCLB.503813.20  | hypothetical protein, conserved                          | -0,01211 | 0,924  |
| TcCLB.508479.224 | hypothetical protein, conserved                          | -0,01225 | 0,9506 |
| TcCLB.506753.164 | hypothetical protein, conserved                          | -0,01227 | 0,9548 |
| TcCLB.511621.250 | hypothetical protein, conserved                          | -0,01229 | 0,9255 |
| TcCLB.507951.154 | cytochrome b5, putative                                  | -0,01232 | 0,9353 |
| TcCLB.510657.30  | Sorting nexin-4 (ATG24)                                  | -0,01236 | 0,9046 |
| TcCLB.511907.240 | protein kinase, putative                                 | -0,01237 | 0,9159 |
| TcCLB.506407.40  | hypothetical protein, conserved                          | -0,01241 | 0,9148 |
| TcCLB.509877.80  | ATPase domain protein, putative                          | -0,01255 | 0,941  |
| TcCLB.507159.44  | DNA-directed RNA polymerase III subunit, putative        | -0,01261 | 0,9252 |
| TcCLB.506241.190 | hypothetical protein, conserved                          | -0,01261 | 0,938  |
| TcCLB.509941.85  | trans-sialidase (pseudogene), putative                   | -0,01264 | 0,9356 |
| TcCLB.507357.130 | mucin TcMUCII, putative                                  | -0,01265 | 0,9757 |
| TcCLB.507601.50  | hypothetical protein                                     | -0,01274 | 0,9288 |
| TcCLB.511577.83  | thioredoxin, putative                                    | -0,01283 | 0,9481 |
| TcCLB.503893.160 | hypothetical protein, conserved                          | -0,01288 | 0,9215 |
| TcCLB.504741.120 | hypothetical protein, conserved                          | -0,01309 | 0,9251 |
| TcCLB.509789.30  | rab-like GTPase activating protein, putative             | -0,01331 | 0,9264 |
| TcCLB.506777.24  | hypothetical protein, conserved                          | -0,01332 | 0,9334 |
| TcCLB.504153.220 | DNA recombination and repair protein RAD51, putative     | -0,01335 | 0,9144 |
| TcCLB.504157.20  | beta-ketoacyl synthase family protein, putative          | -0,01335 | 0,9319 |
| TcCLB.503575.40  | hypothetical protein, conserved                          | -0,01335 | 0,9428 |
| TcCLB.511505.20  | hypothetical protein, conserved                          | -0,01344 | 0,9191 |

|                  |                                                          |          |        |
|------------------|----------------------------------------------------------|----------|--------|
| TcCLB.511215.119 | 69 kDa paraflagellar rod protein, putative               | -0,01378 | 0,9021 |
| TcCLB.510725.90  | hypothetical protein, conserved                          | -0,01379 | 0,9367 |
| TcCLB.511129.47  | hypothetical protein, conserved (pseudogene)             | -0,01388 | 0,9429 |
| TcCLB.507927.30  | hypothetical protein, conserved                          | -0,01389 | 0,9339 |
| TcCLB.509965.70  | hypothetical protein, conserved                          | -0,01392 | 0,9122 |
| TcCLB.505071.70  | hypothetical protein, conserved                          | -0,01397 | 0,9301 |
| TcCLB.504215.10  | hypothetical protein, conserved                          | -0,01398 | 0,9112 |
| TcCLB.508641.250 | hypothetical protein                                     | -0,01408 | 0,896  |
| TcCLB.507979.10  | hypothetical protein, conserved                          | -0,01436 | 0,9296 |
| TcCLB.506367.40  | hypothetical protein, conserved                          | -0,01446 | 0,899  |
| TcCLB.506247.300 | hypothetical protein, conserved                          | -0,01447 | 0,9244 |
| TcCLB.507015.50  | retrotransposon hot spot protein (RHS, pseudogene), puta | -0,01469 | 0,9165 |
| TcCLB.510757.20  | hypothetical protein, conserved                          | -0,01478 | 0,9179 |
| TcCLB.511393.40  | hypothetical protein, conserved                          | -0,01482 | 0,9151 |
| TcCLB.506199.30  | hypothetical protein, conserved                          | -0,01482 | 0,9252 |
| TcCLB.510817.60  | hypothetical protein, conserved                          | -0,01487 | 0,8778 |
| TcCLB.510123.30  | DNA repair protein, putative                             | -0,01488 | 0,9171 |
| TcCLB.510099.70  | hypothetical protein, conserved                          | -0,0149  | 0,8928 |
| TcCLB.511753.130 | U3 small nuclear ribonucleoprotein (snRNP), putative     | -0,01514 | 0,8703 |
| TcCLB.511303.40  | carnitine O-acetyltransferase, putative                  | -0,01516 | 0,905  |
| TcCLB.507625.180 | kinesin, putative                                        | -0,01535 | 0,8978 |
| TcCLB.508457.10  | Kinesin-13 6, putative (KIN13-6)                         | -0,01548 | 0,9098 |
| TcCLB.508325.300 | hypothetical protein, conserved                          | -0,01561 | 0,9424 |
| TcCLB.510729.160 | hypothetical protein, conserved                          | -0,01566 | 0,8984 |
| TcCLB.503647.20  | hypothetical protein, conserved                          | -0,01566 | 0,9362 |
| TcCLB.510483.30  | trans-sialidase (pseudogene), putative                   | -0,01566 | 0,9526 |
| TcCLB.510285.120 | hypothetical protein, conserved                          | -0,0158  | 0,884  |
| TcCLB.508209.130 | hypothetical protein, conserved                          | -0,01588 | 0,9077 |
| TcCLB.510241.124 | hypothetical protein, conserved                          | -0,01597 | 0,8783 |
| TcCLB.507849.80  | hypothetical protein, conserved                          | -0,01632 | 0,9298 |
| TcCLB.510101.350 | hypothetical protein, conserved                          | -0,01638 | 0,8627 |
| TcCLB.509777.30  | trans-sialidase, Group II, putative                      | -0,01643 | 0,8938 |
| TcCLB.510729.50  | hypothetical protein, conserved                          | -0,01647 | 0,9204 |
| TcCLB.510645.9   | serine/threonine protein kinase, putative                | -0,01652 | 0,8972 |
| TcCLB.507093.40  | hypothetical protein, conserved                          | -0,01661 | 0,8593 |
| TcCLB.510943.70  | hypothetical protein, conserved                          | -0,01669 | 0,9147 |
| TcCLB.508637.69  | hypothetical protein, conserved                          | -0,01682 | 0,9142 |
| TcCLB.509203.14  | hypothetical protein                                     | -0,01683 | 0,9375 |
| TcCLB.506175.10  | hypothetical protein, conserved                          | -0,01708 | 0,9012 |
| TcCLB.511725.190 | vacuolar sorting protein, putative                       | -0,01714 | 0,916  |
| TcCLB.507711.210 | hypothetical protein, conserved                          | -0,01715 | 0,8675 |
| TcCLB.510877.40  | hypothetical protein, conserved                          | -0,01722 | 0,8621 |
| TcCLB.506793.20  | hypothetical protein, conserved                          | -0,01733 | 0,8884 |
| TcCLB.503771.40  | syntaxin binding protein (pseudogene), putative          | -0,01734 | 0,9647 |
| TcCLB.506265.10  | hypothetical protein, conserved                          | -0,01747 | 0,9165 |

|                  |                                                          |          |        |
|------------------|----------------------------------------------------------|----------|--------|
| TcCLB.509875.190 | clathrin coat assembly protein, putative                 | -0,01751 | 0,89   |
| TcCLB.509429.50  | retrotransposon hot spot protein (RHS, pseudogene), puta | -0,01757 | 0,8714 |
| TcCLB.511907.190 | hypothetical protein                                     | -0,01764 | 0,8801 |
| TcCLB.504081.141 | syntaxin binding protein (pseudogene), putative          | -0,01765 | 0,9633 |
| TcCLB.503925.100 | hypothetical protein, conserved                          | -0,01776 | 0,9099 |
| TcCLB.506657.10  | hypothetical protein, conserved                          | -0,01795 | 0,9371 |
| TcCLB.506715.59  | Monooxygenase, putative                                  | -0,01801 | 0,9459 |
| TcCLB.508521.18  | trans-sialidase, putative (pseudogene)                   | -0,01805 | 0,9603 |
| TcCLB.507023.60  | hypothetical protein, conserved                          | -0,01814 | 0,8953 |
| TcCLB.510535.90  | hypothetical protein, conserved                          | -0,01823 | 0,9459 |
| TcCLB.506577.47  | hypothetical protein, conserved                          | -0,01831 | 0,8824 |
| TcCLB.509395.120 | histone deacetylase, putative                            | -0,01837 | 0,8778 |
| TcCLB.505997.200 | hypothetical protein, conserved                          | -0,01839 | 0,9092 |
| TcCLB.511751.30  | queuine tRNA-ribosyltransferase, putative                | -0,01846 | 0,8686 |
| TcCLB.510661.240 | hypothetical protein, conserved                          | -0,01854 | 0,8605 |
| TcCLB.510825.20  | hypothetical protein, conserved                          | -0,01857 | 0,9305 |
| TcCLB.510965.10  | hypothetical protein, conserved                          | -0,01869 | 0,8962 |
| TcCLB.509443.10  | hypothetical protein                                     | -0,01889 | 0,9254 |
| TcCLB.509289.10  | amastin, putative                                        | -0,01894 | 0,8903 |
| TcCLB.506961.160 | retrotransposon hot spot (RHS) protein, putative         | -0,01908 | 0,8806 |
| TcCLB.503805.6   | hypothetical protein, conserved                          | -0,01917 | 0,9083 |
| TcCLB.507129.19  | hypothetical protein, conserved                          | -0,01924 | 0,8811 |
| TcCLB.511367.100 | hypothetical protein, conserved                          | -0,01938 | 0,8979 |
| TcCLB.507839.18  | hypothetical protein, conserved                          | -0,01955 | 0,8893 |
| TcCLB.510655.80  | hypothetical protein, conserved                          | -0,01955 | 0,9261 |
| TcCLB.505037.50  | small GTP-binding protein RAB6, putative                 | -0,01962 | 0,863  |
| TcCLB.510573.19  | hypothetical protein, conserved                          | -0,01962 | 0,9051 |
| TcCLB.511875.5   | elongation factor 1-gamma (EF-1-gamma, pseudogene),      | -0,01962 | 0,9561 |
| TcCLB.509805.200 | acetyltransferase, putative                              | -0,01996 | 0,8633 |
| TcCLB.510303.310 | arginine N-methyltransferase, type III, putative (PRMT7) | -0,02013 | 0,8446 |
| TcCLB.510745.10  | hypothetical protein, conserved                          | -0,0203  | 0,8764 |
| TcCLB.509567.50  | hypothetical protein, conserved                          | -0,02048 | 0,8813 |
| TcCLB.510901.190 | hypothetical protein, conserved                          | -0,02065 | 0,8703 |
| TcCLB.508119.190 | hypothetical protein, conserved                          | -0,02069 | 0,8341 |
| TcCLB.503865.70  | hypothetical protein, conserved                          | -0,02085 | 0,8434 |
| TcCLB.510617.10  | hypothetical protein, conserved                          | -0,02088 | 0,9044 |
| TcCLB.510519.90  | hypothetical protein, conserved                          | -0,02089 | 0,9278 |
| TcCLB.510329.230 | hypothetical protein, conserved                          | -0,0209  | 0,877  |
| TcCLB.510359.140 | hypothetical protein, conserved                          | -0,02091 | 0,9191 |
| TcCLB.506303.60  | protein kinase, putative                                 | -0,02109 | 0,8967 |
| TcCLB.511725.90  | hypothetical protein, conserved                          | -0,02111 | 0,8795 |
| TcCLB.506671.30  | mucin-associated surface protein (MASP, pseudogene), pi  | -0,02111 | 0,9187 |
| TcCLB.509747.90  | hypothetical protein, conserved                          | -0,02115 | 0,8913 |
| TcCLB.510187.74  | short-chain dehydrogenase, putative                      | -0,0212  | 0,8817 |
| TcCLB.508909.60  | hypothetical protein, conserved                          | -0,02138 | 0,8872 |

|                  |                                                           |          |        |
|------------------|-----------------------------------------------------------|----------|--------|
| TcCLB.508153.840 | hypothetical protein, conserved                           | -0,02147 | 0,8683 |
| TcCLB.407335.18  | hypothetical protein, conserved                           | -0,02149 | 0,8984 |
| TcCLB.506925.510 | ribosome production factor 1, putative                    | -0,02162 | 0,8386 |
| TcCLB.509777.110 | hypothetical protein, conserved                           | -0,02164 | 0,9026 |
| TcCLB.511239.80  | hypothetical protein, conserved                           | -0,02197 | 0,8675 |
| TcCLB.503651.49  | hypothetical protein, conserved (pseudogene)              | -0,02198 | 0,887  |
| TcCLB.508951.80  | hypothetical protein, conserved                           | -0,02209 | 0,8536 |
| TcCLB.506479.50  | rRNA biogenesis protein, putative                         | -0,0221  | 0,8466 |
| TcCLB.503599.50  | hypothetical protein, conserved                           | -0,02217 | 0,8988 |
| TcCLB.510765.20  | hypothetical protein, conserved                           | -0,02218 | 0,9144 |
| TcCLB.509817.50  | trans-sialidase, Group I, putative                        | -0,02219 | 0,9331 |
| TcCLB.506857.50  | hypothetical protein, conserved                           | -0,02234 | 0,8377 |
| TcCLB.506591.50  | hypothetical protein, conserved (pseudogene)              | -0,02241 | 0,8025 |
| TcCLB.510087.100 | GINS complex subunit Psf3, putative                       | -0,02248 | 0,9236 |
| TcCLB.508727.54  | hypothetical protein, conserved                           | -0,02249 | 0,8741 |
| TcCLB.509061.20  | hypothetical protein, conserved                           | -0,02253 | 0,8767 |
| TcCLB.503849.80  | NADH-dependent fumarate reductase, putative               | -0,02259 | 0,9191 |
| TcCLB.511743.20  | hypothetical protein, conserved                           | -0,02264 | 0,859  |
| TcCLB.509695.210 | serine carboxypeptidase (CBP1), putative                  | -0,02264 | 0,8717 |
| TcCLB.511313.40  | ATP-dependent RNA helicase, putative                      | -0,02295 | 0,8222 |
| TcCLB.509267.6   | trans-sialidase (pseudogene), putative                    | -0,02298 | 0,9187 |
| TcCLB.509973.40  | hypothetical protein                                      | -0,02303 | 0,9491 |
| TcCLB.506723.41  | beta galactofuranosyl glycosyltransferase (pseudogene), p | -0,0231  | 0,8838 |
| TcCLB.503911.20  | pre-mRNA splicing factor ATP-dependent RNA helicase, p    | -0,02319 | 0,8627 |
| TcCLB.503913.10  | hypothetical protein, conserved                           | -0,0232  | 0,8658 |
| TcCLB.506227.160 | MOZ/SAS family acetyltransferase, putative                | -0,02323 | 0,8666 |
| TcCLB.506925.540 | hypothetical protein, conserved                           | -0,02334 | 0,8401 |
| TcCLB.507021.80  | hypothetical protein, conserved                           | -0,02336 | 0,8682 |
| TcCLB.440343.9   | dispersed gene family protein 1 (DGF-1), putative (fragme | -0,02338 | 0,959  |
| TcCLB.503589.10  | GDP-mannose pyrophosphorylase                             | -0,02344 | 0,8655 |
| TcCLB.509991.100 | Transcription elongation factor 1 domain-containing prote | -0,02358 | 0,8663 |
| TcCLB.507831.80  | hypothetical protein, conserved                           | -0,02367 | 0,8593 |
| TcCLB.504045.100 | hypothetical protein, conserved                           | -0,0237  | 0,8591 |
| TcCLB.506929.40  | target SNARE, putative                                    | -0,02378 | 0,8582 |
| TcCLB.507021.50  | kinesin, putative                                         | -0,02379 | 0,8078 |
| TcCLB.505807.100 | hypothetical protein, conserved                           | -0,0238  | 0,8655 |
| TcCLB.506883.60  | hypothetical protein, conserved                           | -0,02383 | 0,8591 |
| TcCLB.503589.19  | hypothetical protein, conserved                           | -0,02389 | 0,9147 |
| TcCLB.506985.20  | hypothetical protein, conserved                           | -0,02431 | 0,8767 |
| TcCLB.506203.70  | pre-mRNA-splicing factor ATP-dependent RNA helicase, p    | -0,02445 | 0,8085 |
| TcCLB.510659.50  | RNA polymerase-associated protein LEO1, putative          | -0,02457 | 0,7916 |
| TcCLB.507993.110 | hypothetical protein, conserved                           | -0,02464 | 0,8738 |
| TcCLB.510291.20  | hypothetical protein, conserved                           | -0,02473 | 0,8622 |
| TcCLB.401041.10  | retrotransposon hot spot protein (RHS, pseudogene), puta  | -0,02477 | 0,8347 |
| TcCLB.507603.120 | hypothetical protein, conserved                           | -0,02478 | 0,8162 |

|                  |                                                            |          |        |
|------------------|------------------------------------------------------------|----------|--------|
| TcCLB.506187.40  | trans-sialidase (pseudogene), putative                     | -0,02478 | 0,9194 |
| TcCLB.511865.40  | hypothetical protein, conserved                            | -0,02487 | 0,8269 |
| TcCLB.511277.50  | hypothetical protein, conserved                            | -0,02505 | 0,8153 |
| TcCLB.511367.129 | hypothetical protein, conserved                            | -0,02515 | 0,8648 |
| TcCLB.511245.60  | hypothetical protein, conserved                            | -0,02522 | 0,924  |
| TcCLB.506101.20  | trans-sialidase (pseudogene), putative                     | -0,0253  | 0,9121 |
| TcCLB.508237.9   | protein kinase, putative                                   | -0,02535 | 0,8864 |
| TcCLB.509805.180 | ttaggg binding factor, putative                            | -0,02565 | 0,836  |
| TcCLB.509997.60  | hypothetical protein, conserved                            | -0,02581 | 0,7841 |
| TcCLB.510725.50  | hypothetical protein, conserved                            | -0,02581 | 0,8106 |
| TcCLB.504021.30  | hypothetical protein, conserved                            | -0,02595 | 0,8    |
| TcCLB.508547.80  | hypothetical protein, conserved                            | -0,02595 | 0,8203 |
| TcCLB.504817.20  | hypothetical protein, conserved                            | -0,02604 | 0,8426 |
| TcCLB.508065.60  | hypothetical protein, conserved                            | -0,02625 | 0,8376 |
| TcCLB.508199.10  | ADP-ribosylation factor, putative                          | -0,0263  | 0,8587 |
| TcCLB.504935.10  | eukaryotic translation initiation factor 4E, putative      | -0,02632 | 0,8686 |
| TcCLB.509231.39  | hypothetical protein, conserved                            | -0,02648 | 0,8997 |
| TcCLB.507721.10  | hypothetical protein, conserved                            | -0,02651 | 0,8648 |
| TcCLB.507087.10  | hydrolase-like protein (pseudogene), putative              | -0,02653 | 0,889  |
| TcCLB.511771.171 | hypothetical protein                                       | -0,02658 | 0,928  |
| TcCLB.509171.70  | hypothetical protein, conserved                            | -0,02662 | 0,8594 |
| TcCLB.509485.20  | retrotransposon hot spot protein (RHS, pseudogene), puta   | -0,02667 | 0,8913 |
| TcCLB.506811.180 | protein kinase, putative                                   | -0,02671 | 0,8995 |
| TcCLB.506465.50  | serine/threonine protein phosphatase-like protein, putativ | -0,02671 | 0,904  |
| TcCLB.511751.250 | hypothetical protein, conserved                            | -0,02687 | 0,8617 |
| TcCLB.507663.20  | hypothetical protein, conserved                            | -0,02693 | 0,8414 |
| TcCLB.511385.14  | hypothetical protein, conserved (fragment)                 | -0,0271  | 0,828  |
| TcCLB.504741.10  | hypothetical protein, conserved                            | -0,02718 | 0,8913 |
| TcCLB.507711.250 | hypothetical protein, conserved                            | -0,0272  | 0,8125 |
| TcCLB.506211.250 | fibrillar, putative                                        | -0,02721 | 0,8383 |
| TcCLB.509287.20  | protein kinase, putative                                   | -0,02726 | 0,8418 |
| TcCLB.511277.220 | hypothetical protein, conserved                            | -0,02732 | 0,8622 |
| TcCLB.413293.30  | retrotransposon hot spot protein (RHS, pseudogene), puta   | -0,02739 | 0,8569 |
| TcCLB.506009.70  | hypothetical protein                                       | -0,02741 | 0,8514 |
| TcCLB.508647.140 | DNA replication licensing factor MCM5, putative            | -0,02744 | 0,8097 |
| TcCLB.511415.11  | retrotransposon hot spot (RHS) protein, putative (fragmer  | -0,02746 | 0,8665 |
| TcCLB.506815.30  | beta prime cop protein, putative                           | -0,02747 | 0,8    |
| TcCLB.506811.210 | cell division cycle protein 45 (CDC45), putative           | -0,02753 | 0,832  |
| TcCLB.509429.30  | retrotransposon hot spot protein (RHS, pseudogene), puta   | -0,02773 | 0,8099 |
| TcCLB.509259.126 | hypothetical protein                                       | -0,02782 | 0,896  |
| TcCLB.507625.84  | hypothetical protein, conserved                            | -0,02783 | 0,8732 |
| TcCLB.510623.10  | mucin TcMUCII, putative                                    | -0,02786 | 0,9542 |
| TcCLB.511433.10  | hypothetical protein, conserved                            | -0,02788 | 0,8669 |
| TcCLB.506567.140 | hypothetical protein, conserved                            | -0,02789 | 0,8973 |
| TcCLB.510763.100 | trypanin-like protein, putative                            | -0,02791 | 0,8028 |

|                  |                                                            |          |        |
|------------------|------------------------------------------------------------|----------|--------|
| TcCLB.509647.90  | chloride channel protein, putative                         | -0,028   | 0,8179 |
| TcCLB.509055.40  | hypothetical protein, conserved                            | -0,02803 | 0,8181 |
| TcCLB.510329.320 | hypothetical protein, conserved                            | -0,02805 | 0,8648 |
| TcCLB.508173.54  | hypothetical protein, conserved                            | -0,02807 | 0,7944 |
| TcCLB.510603.40  | hypothetical protein, conserved                            | -0,02814 | 0,7966 |
| TcCLB.509959.236 | N-acetyltransferase complex ARD1 subunit (pseudogene),     | -0,02815 | 0,9571 |
| TcCLB.506519.90  | hypothetical protein, conserved                            | -0,02826 | 0,8587 |
| TcCLB.461165.4   | hypothetical protein, conserved (fragment)                 | -0,02827 | 0,914  |
| TcCLB.508207.5   | retrotransposon hot spot protein (RHS, pseudogene), puta   | -0,02832 | 0,8105 |
| TcCLB.508719.70  | flagellum targeting protein kharon1, putative (KH1)        | -0,02834 | 0,822  |
| TcCLB.507821.140 | trans-sialidase (pseudogene), putative                     | -0,02842 | 0,9099 |
| TcCLB.506855.360 | hypothetical protein, conserved                            | -0,02843 | 0,7807 |
| TcCLB.508771.30  | hypothetical protein, conserved                            | -0,02849 | 0,8511 |
| TcCLB.510155.210 | calcium/potassium channel (CAKC), putative                 | -0,02857 | 0,8272 |
| TcCLB.506739.120 | hypothetical protein, conserved                            | -0,02867 | 0,8241 |
| TcCLB.508941.10  | retrotransposon hot spot protein (RHS, pseudogene), puta   | -0,02905 | 0,9447 |
| TcCLB.511529.240 | hypothetical protein, conserved                            | -0,02906 | 0,7796 |
| TcCLB.510545.73  | syntaxin binding protein (pseudogene), putative            | -0,02918 | 0,9207 |
| TcCLB.509745.40  | hypothetical protein, conserved                            | -0,02923 | 0,8261 |
| TcCLB.507837.30  | hypothetical protein, conserved                            | -0,02926 | 0,7946 |
| TcCLB.509859.30  | hypothetical protein, conserved                            | -0,02933 | 0,8143 |
| TcCLB.510425.28  | hypothetical protein, conserved                            | -0,02933 | 0,9128 |
| TcCLB.503939.90  | hypothetical protein, conserved                            | -0,02943 | 0,7678 |
| TcCLB.511879.9   | hypothetical protein, conserved                            | -0,02943 | 0,7791 |
| TcCLB.509231.26  | hypothetical protein, conserved                            | -0,02957 | 0,8263 |
| TcCLB.503909.84  | calpain-like cysteine peptidase, putative                  | -0,02961 | 0,8241 |
| TcCLB.508479.490 | hypothetical protein                                       | -0,02976 | 0,8921 |
| TcCLB.506913.10  | hypothetical protein, conserved                            | -0,02984 | 0,8685 |
| TcCLB.506849.20  | dynein heavy chain (pseudogene), putative                  | -0,02989 | 0,8479 |
| TcCLB.510603.119 | hypothetical protein, conserved                            | -0,03    | 0,885  |
| TcCLB.508865.10  | glutathione synthetase, putative                           | -0,03002 | 0,8246 |
| TcCLB.508741.310 | hypothetical protein                                       | -0,03016 | 0,8378 |
| TcCLB.508951.90  | hypothetical protein, conserved                            | -0,03023 | 0,8514 |
| TcCLB.510659.104 | poly(ADP-ribose) glycohydrolase, putative                  | -0,03026 | 0,827  |
| TcCLB.506357.69  | hypothetical protein, conserved                            | -0,03049 | 0,9091 |
| TcCLB.510255.20  | hypothetical protein, conserved                            | -0,03051 | 0,8442 |
| TcCLB.509999.80  | hypothetical protein, conserved                            | -0,03052 | 0,7691 |
| TcCLB.510091.70  | U6 snRNA-associated Sm-like protein LSm8, putative         | -0,03064 | 0,8657 |
| TcCLB.510063.10  | sigma-adaptin 3, putative                                  | -0,0307  | 0,8523 |
| TcCLB.510089.120 | hypothetical protein, conserved                            | -0,03088 | 0,8383 |
| TcCLB.506659.30  | glutathione synthetase, putative                           | -0,03095 | 0,821  |
| TcCLB.506337.30  | class-E vacuolar protein-sorting protein 24 (Vps24p), puta | -0,03115 | 0,8094 |
| TcCLB.510429.30  | hypothetical protein, conserved                            | -0,03122 | 0,8195 |
| TcCLB.507093.184 | hypothetical protein, conserved                            | -0,03126 | 0,8023 |
| TcCLB.503733.30  | hypothetical protein, conserved                            | -0,03136 | 0,8045 |

|                  |                                                          |          |        |
|------------------|----------------------------------------------------------|----------|--------|
| TcCLB.507709.130 | hypothetical protein, conserved                          | -0,0315  | 0,8424 |
| TcCLB.503887.60  | glycerolphosphate mutase, putative                       | -0,03152 | 0,8149 |
| TcCLB.506493.50  | serine/threonine protein kinase, putative                | -0,03163 | 0,8809 |
| TcCLB.506465.30  | hypothetical protein, conserved                          | -0,03166 | 0,8037 |
| TcCLB.506953.20  | hypothetical protein, conserved                          | -0,03166 | 0,88   |
| TcCLB.509611.100 | lipoate-protein ligase, putative                         | -0,03169 | 0,8383 |
| TcCLB.508137.20  | hypothetical protein, conserved                          | -0,0317  | 0,7525 |
| TcCLB.507807.10  | hypothetical protein, conserved                          | -0,03175 | 0,7339 |
| TcCLB.506983.30  | hypothetical protein, conserved                          | -0,03189 | 0,7746 |
| TcCLB.506563.20  | exosome-associated protein 1, putative (EAP1)            | -0,03198 | 0,8514 |
| TcCLB.507001.120 | hypothetical protein, conserved                          | -0,03199 | 0,8405 |
| TcCLB.503953.14  | hypothetical protein, conserved                          | -0,03207 | 0,8347 |
| TcCLB.507801.40  | hypothetical protein, conserved                          | -0,0321  | 0,8827 |
| TcCLB.511751.114 | hypothetical protein, conserved                          | -0,03222 | 0,8736 |
| TcCLB.509583.19  | dynein heavy chain, putative (fragment)                  | -0,03229 | 0,8507 |
| TcCLB.510743.60  | phospholipase A1, putative                               | -0,03232 | 0,8272 |
| TcCLB.504057.40  | NAD dependent epimerase/dehydratase family, putative (   | -0,03242 | 0,7556 |
| TcCLB.511407.60  | small GTP-binding protein Rab11, putative (Rab11)        | -0,03251 | 0,8005 |
| TcCLB.510899.30  | hypothetical protein, conserved                          | -0,03252 | 0,8223 |
| TcCLB.511115.40  | transcription elongation factor s-II, putative           | -0,03256 | 0,7695 |
| TcCLB.503439.40  | trans-sialidase (pseudogene), putative                   | -0,03259 | 0,8276 |
| TcCLB.505807.160 | hypothetical protein, conserved                          | -0,03274 | 0,8475 |
| TcCLB.506051.10  | retrotransposon hot spot protein (RHS, pseudogene), puta | -0,03284 | 0,8383 |
| TcCLB.503917.35  | B9 domain-containing protein 2 (b9d2)                    | -0,03284 | 0,8654 |
| TcCLB.511595.50  | mucin-associated surface protein (MASP, pseudogene), pi  | -0,03284 | 0,8827 |
| TcCLB.511003.100 | hypothetical protein, conserved                          | -0,03287 | 0,7773 |
| TcCLB.503981.80  | hypothetical protein, conserved                          | -0,03317 | 0,7063 |
| TcCLB.508405.80  | cysteine peptidase, Clan CD, family C50, putative        | -0,03318 | 0,7765 |
| TcCLB.508817.150 | hypothetical protein, conserved                          | -0,03326 | 0,7841 |
| TcCLB.506629.140 | hypothetical protein, conserved                          | -0,03344 | 0,7854 |
| TcCLB.511619.10  | hypothetical protein, conserved                          | -0,03346 | 0,8316 |
| TcCLB.508467.19  | hypothetical protein, conserved (fragment)               | -0,03355 | 0,8817 |
| TcCLB.511269.30  | hypothetical protein, conserved                          | -0,03379 | 0,8365 |
| TcCLB.508831.70  | U5 snRNP-specific 40 kDa protein, putative               | -0,03413 | 0,801  |
| TcCLB.510225.50  | hypothetical protein, conserved                          | -0,03419 | 0,8241 |
| TcCLB.503977.79  | elongation factor 1-gamma (EF-1-gamma), putative         | -0,0343  | 0,9452 |
| TcCLB.508205.48  | hypothetical protein, conserved                          | -0,03438 | 0,8806 |
| TcCLB.510951.10  | hypothetical protein, conserved                          | -0,03438 | 0,8906 |
| TcCLB.503973.20  | trans-sialidase (pseudogene), putative                   | -0,03444 | 0,8798 |
| TcCLB.511483.50  | hypothetical protein, conserved                          | -0,03455 | 0,857  |
| TcCLB.511669.20  | hypothetical protein                                     | -0,03464 | 0,9087 |
| TcCLB.510945.10  | ubiquitin carboxyl-terminal hydrolase, putative          | -0,03466 | 0,8024 |
| TcCLB.511717.80  | DNA repair and recombination helicase protein PIF4, puta | -0,0347  | 0,8416 |
| TcCLB.511903.30  | ubiquitin-conjugating enzyme E2, putative                | -0,03476 | 0,7648 |
| TcCLB.503579.150 | RNA editing 3' terminal uridylyl transferase 2, putative | -0,03499 | 0,8085 |



|                  |                                                          |          |        |
|------------------|----------------------------------------------------------|----------|--------|
| TcCLB.504117.9   | hypothetical protein, conserved                          | -0,03502 | 0,7613 |
| TcCLB.508827.139 | Coatomer subunit gamma (fragment) (COPG)                 | -0,03506 | 0,7193 |
| TcCLB.511585.190 | eukaryotic initiation factor 4a, putative                | -0,03516 | 0,6833 |
| TcCLB.508813.50  | oxidoreductase-like protein, putative                    | -0,03528 | 0,7424 |
| TcCLB.506513.14  | hypothetical protein, conserved                          | -0,0355  | 0,8594 |
| TcCLB.506591.90  | hypothetical protein, conserved                          | -0,03555 | 0,948  |
| TcCLB.398751.10  | hypothetical protein, conserved                          | -0,03569 | 0,9245 |
| TcCLB.510155.30  | hypothetical protein, conserved                          | -0,0357  | 0,7178 |
| TcCLB.511277.510 | hypothetical protein, conserved                          | -0,03572 | 0,7223 |
| TcCLB.506107.20  | dihydrouridine synthase (Dus), putative                  | -0,03592 | 0,8617 |
| TcCLB.511249.100 | hypothetical protein, conserved                          | -0,036   | 0,6938 |
| TcCLB.508693.170 | hypothetical protein, conserved                          | -0,03605 | 0,8083 |
| TcCLB.506885.260 | hypothetical protein, conserved                          | -0,03607 | 0,7059 |
| TcCLB.511287.170 | hypothetical protein, conserved                          | -0,03613 | 0,7697 |
| TcCLB.508153.830 | peter pan protein, putative                              | -0,0362  | 0,806  |
| TcCLB.510187.10  | hypothetical protein, conserved                          | -0,03622 | 0,896  |
| TcCLB.510073.90  | hypothetical protein, conserved                          | -0,03624 | 0,7821 |
| TcCLB.511807.260 | hypothetical protein, conserved                          | -0,03642 | 0,6617 |
| TcCLB.509567.40  | nuclear transport factor 2, putative                     | -0,0365  | 0,7989 |
| TcCLB.506959.50  | hypothetical protein, conserved                          | -0,03665 | 0,768  |
| TcCLB.511021.10  | protein phosphatase 2A catalytic subunit, putative       | -0,03667 | 0,8108 |
| TcCLB.503663.10  | septum formation inhibitor, Maf-like protein, putative   | -0,03674 | 0,84   |
| TcCLB.508819.50  | katanin, putative (fragment)                             | -0,03753 | 0,8241 |
| TcCLB.510257.10  | hypothetical protein, conserved                          | -0,03765 | 0,6457 |
| TcCLB.508173.260 | hypothetical protein, conserved                          | -0,03775 | 0,7814 |
| TcCLB.509671.30  | hypothetical protein, conserved                          | -0,03776 | 0,7888 |
| TcCLB.507787.10  | kinesin-like protein (pseudogene), putative              | -0,03795 | 0,7963 |
| TcCLB.509053.60  | hypothetical protein, conserved                          | -0,03823 | 0,8473 |
| TcCLB.508409.50  | hypothetical protein, conserved                          | -0,03824 | 0,7549 |
| TcCLB.510857.20  | hypothetical protein, conserved                          | -0,03843 | 0,8208 |
| TcCLB.509629.20  | DnaJ chaperone protein, putative                         | -0,03847 | 0,8426 |
| TcCLB.506857.70  | hypothetical protein, conserved                          | -0,03851 | 0,7528 |
| TcCLB.509967.100 | hypothetical protein, conserved (pseudogene)             | -0,03856 | 0,8256 |
| TcCLB.506945.200 | mago nashi-like protein, putative                        | -0,03859 | 0,7092 |
| TcCLB.469785.5   | hypothetical protein, conserved (fragment)               | -0,03889 | 0,8481 |
| TcCLB.510969.30  | hypothetical protein, conserved                          | -0,03916 | 0,853  |
| TcCLB.506493.9   | hypothetical protein, conserved                          | -0,03937 | 0,7899 |
| TcCLB.511483.10  | hypothetical protein                                     | -0,03938 | 0,7661 |
| TcCLB.464807.20  | hypothetical protein, conserved (fragment)               | -0,03958 | 0,7533 |
| TcCLB.508965.60  | rac serine-threonine kinase, putative                    | -0,03964 | 0,7173 |
| TcCLB.509217.150 | retrotransposon hot spot protein (RHS, pseudogene), puta | -0,03966 | 0,8316 |
| TcCLB.506679.260 | hypothetical protein, conserved                          | -0,03974 | 0,7168 |
| TcCLB.508169.30  | hypothetical protein, conserved                          | -0,03999 | 0,7911 |
| TcCLB.510081.11  | hypothetical protein, conserved (pseudogene)             | -0,04001 | 0,7483 |
| TcCLB.508891.10  | dolichyl-P-Man:GDP-ManGlcNAc2-PP-dolichyl beta-1,4-m     | -0,04007 | 0,8197 |

|                  |                                                                     |          |        |
|------------------|---------------------------------------------------------------------|----------|--------|
| TcCLB.506967.13  | hypothetical protein, conserved                                     | -0,0401  | 0,8514 |
| TcCLB.506631.40  | hypothetical protein, conserved                                     | -0,04017 | 0,7205 |
| TcCLB.510063.20  | ATP-dependent DEAD/H DNA helicase recQ, putative                    | -0,0402  | 0,8624 |
| TcCLB.510329.60  | RAB GDP dissociation inhibitor alpha, putative                      | -0,04028 | 0,6863 |
| TcCLB.509633.10  | hypothetical protein, conserved                                     | -0,0405  | 0,8246 |
| TcCLB.511019.120 | hypothetical protein, conserved                                     | -0,04053 | 0,7065 |
| TcCLB.504057.178 | hypothetical protein, conserved                                     | -0,0406  | 0,7627 |
| TcCLB.511511.60  | phospholipid-translocating P-type ATPase (flippase), putative       | -0,04066 | 0,7969 |
| TcCLB.510311.40  | hypothetical protein, conserved                                     | -0,0408  | 0,6526 |
| TcCLB.508817.5   | dynein heavy chain, putative                                        | -0,04088 | 0,8128 |
| TcCLB.506675.99  | trans-sialidase (pseudogene), putative                              | -0,0409  | 0,9068 |
| TcCLB.511815.70  | hypothetical protein, conserved                                     | -0,04116 | 0,8426 |
| TcCLB.508173.200 | hypothetical protein, conserved                                     | -0,04128 | 0,6035 |
| TcCLB.508529.30  | retrotransposon hot spot protein (RHS, pseudogene), putative        | -0,0414  | 0,7107 |
| TcCLB.510197.47  | mucin TcMUCII (pseudogene), putative                                | -0,04142 | 0,8743 |
| TcCLB.507773.40  | hypothetical protein, conserved                                     | -0,04145 | 0,7273 |
| TcCLB.511927.20  | hypothetical protein, conserved                                     | -0,04145 | 0,8083 |
| TcCLB.511467.13  | hypothetical protein, conserved                                     | -0,04155 | 0,8261 |
| TcCLB.511817.130 | hypothetical protein, conserved                                     | -0,04157 | 0,806  |
| TcCLB.503687.20  | glyceraldehyde-3-phosphate dehydrogenase, putative                  | -0,04159 | 0,7424 |
| TcCLB.507771.9   | kinesin, putative (fragment)                                        | -0,0416  | 0,862  |
| TcCLB.511321.70  | hypothetical protein, conserved                                     | -0,04161 | 0,721  |
| TcCLB.511573.58  | Nucleolar protein 56, putative (fragment) (NOP56)                   | -0,04174 | 0,7049 |
| TcCLB.507093.270 | guanine nucleotide releasing protein, putative                      | -0,04177 | 0,7652 |
| TcCLB.511003.190 | hypothetical protein, conserved                                     | -0,04188 | 0,8019 |
| TcCLB.510083.30  | retrotransposon hot spot protein (RHS, pseudogene), putative        | -0,0419  | 0,6739 |
| TcCLB.509029.160 | hypothetical protein, conserved                                     | -0,0419  | 0,7212 |
| TcCLB.508541.10  | elongation factor 1-gamma (EF-1-gamma, pseudogene), putative        | -0,04193 | 0,8916 |
| TcCLB.511897.10  | TFIIH basal transcription factor complex helicase subunit, putative | -0,042   | 0,7135 |
| TcCLB.510187.540 | amino acid permease, putative                                       | -0,04207 | 0,7431 |
| TcCLB.510303.270 | hypothetical protein, conserved                                     | -0,04216 | 0,5933 |
| TcCLB.508479.220 | hypothetical protein, conserved                                     | -0,04238 | 0,7881 |
| TcCLB.510691.4   | hypothetical protein, conserved                                     | -0,04249 | 0,8735 |
| TcCLB.509565.9   | hypothetical protein (fragment)                                     | -0,0425  | 0,6452 |
| TcCLB.506961.97  | N-acetyltransferase complex ARD1 subunit (pseudogene), putative     | -0,04268 | 0,8963 |
| TcCLB.508879.80  | hypothetical protein, conserved                                     | -0,04272 | 0,7494 |
| TcCLB.507063.250 | hypothetical protein                                                | -0,04277 | 0,8339 |
| TcCLB.507969.50  | actin 2, putative                                                   | -0,04281 | 0,7963 |
| TcCLB.510595.40  | hypothetical protein, conserved                                     | -0,04296 | 0,7686 |
| TcCLB.506847.70  | hypothetical protein, conserved                                     | -0,04319 | 0,7966 |
| TcCLB.510997.30  | hypothetical protein, conserved                                     | -0,0432  | 0,6839 |
| TcCLB.509259.111 | N-acetyltransferase complex ARD1 subunit (pseudogene), putative     | -0,04321 | 0,8934 |
| TcCLB.508385.40  | dual specificity protein phosphatase, putative                      | -0,04331 | 0,7761 |
| TcCLB.509747.60  | hypothetical protein, conserved                                     | -0,04334 | 0,697  |
| TcCLB.508231.50  | legume-like lectin, putative                                        | -0,04343 | 0,763  |

|                  |                                                               |          |        |
|------------------|---------------------------------------------------------------|----------|--------|
| TcCLB.506327.60  | hypothetical protein, conserved                               | -0,04346 | 0,7935 |
| TcCLB.509707.29  | phosphatidylinositol-4-phosphate 5-kinase-like protein        | -0,0435  | 0,825  |
| TcCLB.509999.60  | lipase domain protein, putative                               | -0,04352 | 0,6413 |
| TcCLB.506383.10  | mannosyl-oligosaccharide 1,2-alpha-mannosidase IB, putative   | -0,04367 | 0,7593 |
| TcCLB.507513.20  | hypothetical protein, conserved                               | -0,04371 | 0,7115 |
| TcCLB.510659.36  | hypothetical protein, conserved                               | -0,04375 | 0,7348 |
| TcCLB.510517.30  | hypothetical protein, conserved                               | -0,0439  | 0,6826 |
| TcCLB.509693.120 | hypothetical protein, conserved                               | -0,04397 | 0,6831 |
| TcCLB.504151.50  | hypothetical protein, conserved                               | -0,04407 | 0,8059 |
| TcCLB.511339.10  | UDP-Gal or UDP-GlcNAc-dependent glycosyltransferase, putative | -0,04407 | 0,889  |
| TcCLB.510053.20  | hypothetical protein, conserved                               | -0,0441  | 0,7106 |
| TcCLB.509443.48  | hypothetical protein, conserved                               | -0,04411 | 0,828  |
| TcCLB.508881.130 | hypothetical protein, conserved                               | -0,04421 | 0,7675 |
| TcCLB.509169.10  | hypothetical protein, conserved                               | -0,04426 | 0,718  |
| TcCLB.510767.40  | hypothetical protein, conserved                               | -0,04429 | 0,7595 |
| TcCLB.509733.120 | hypothetical protein, conserved                               | -0,0443  | 0,6546 |
| TcCLB.511217.80  | hypothetical protein, conserved                               | -0,04432 | 0,8572 |
| TcCLB.510719.230 | hypothetical protein, conserved                               | -0,04489 | 0,689  |
| TcCLB.506627.10  | AMP deaminase 2, putative                                     | -0,04507 | 0,7051 |
| TcCLB.507017.170 | hypothetical protein, conserved                               | -0,04522 | 0,8188 |
| TcCLB.506175.70  | hypothetical protein, conserved                               | -0,04523 | 0,7061 |
| TcCLB.506165.16  | protein kinase, putative                                      | -0,04524 | 0,867  |
| TcCLB.507849.60  | hypothetical protein, conserved                               | -0,04537 | 0,6678 |
| TcCLB.508951.10  | hypothetical protein, conserved                               | -0,04537 | 0,7105 |
| TcCLB.506247.270 | ATPase, putative                                              | -0,04539 | 0,635  |
| TcCLB.511925.50  | hypothetical protein, conserved                               | -0,04539 | 0,7255 |
| TcCLB.510655.70  | hypothetical protein, conserved                               | -0,04547 | 0,7749 |
| TcCLB.503779.40  | protein-l-isoaspartate o-methyltransferase, putative          | -0,04555 | 0,7071 |
| TcCLB.503809.10  | hypothetical protein, conserved                               | -0,04562 | 0,657  |
| TcCLB.511589.29  | hypothetical protein, conserved                               | -0,04576 | 0,7584 |
| TcCLB.407477.69  | hypothetical protein, conserved (fragment)                    | -0,0458  | 0,7549 |
| TcCLB.508871.30  | surface protease GP63 (pseudogene), putative                  | -0,04582 | 0,8704 |
| TcCLB.506941.139 | zinc finger protein, putative                                 | -0,0461  | 0,6773 |
| TcCLB.508895.50  | RNA-binding protein, putative                                 | -0,04621 | 0,6813 |
| TcCLB.508355.210 | hypothetical protein, conserved                               | -0,04623 | 0,763  |
| TcCLB.507663.9   | hypothetical protein, conserved                               | -0,04625 | 0,8223 |
| TcCLB.511071.160 | hypothetical protein, conserved                               | -0,04628 | 0,7584 |
| TcCLB.508479.200 | palmitoyl acyltransferase 10, putative                        | -0,04633 | 0,6791 |
| TcCLB.506265.150 | hypothetical protein, conserved                               | -0,04641 | 0,8022 |
| TcCLB.510407.40  | hypothetical protein, conserved                               | -0,04643 | 0,7327 |
| TcCLB.506855.160 | hypothetical protein, conserved                               | -0,04648 | 0,6111 |
| TcCLB.508577.80  | hypothetical protein, conserved                               | -0,04649 | 0,792  |
| TcCLB.508149.40  | hypothetical protein, conserved (pseudogene)                  | -0,04649 | 0,8675 |
| TcCLB.508755.11  | trans-sialidase (pseudogene), putative                        | -0,04651 | 0,8281 |
| TcCLB.509229.90  | hypothetical protein, conserved                               | -0,04656 | 0,6758 |

|                  |                                                              |          |        |
|------------------|--------------------------------------------------------------|----------|--------|
| TcCLB.510877.110 | hypothetical protein, conserved                              | -0,04681 | 0,5669 |
| TcCLB.510579.50  | hypothetical protein, conserved                              | -0,0469  | 0,7074 |
| TcCLB.508823.110 | hypothetical protein, conserved                              | -0,04696 | 0,5939 |
| TcCLB.436497.10  | hypothetical protein                                         | -0,0472  | 0,7494 |
| TcCLB.506147.70  | hypothetical protein, conserved                              | -0,04743 | 0,7399 |
| TcCLB.511903.10  | hypothetical protein                                         | -0,04745 | 0,8424 |
| TcCLB.511285.90  | 19S proteasome non-atpase subunit 8 (Rpn8)                   | -0,04747 | 0,6716 |
| TcCLB.507787.40  | hypothetical protein, conserved                              | -0,04765 | 0,7737 |
| TcCLB.511589.100 | hypothetical protein, conserved                              | -0,04768 | 0,822  |
| TcCLB.506929.20  | hypothetical protein, conserved                              | -0,04776 | 0,6805 |
| TcCLB.509179.90  | hypothetical protein, conserved                              | -0,04777 | 0,8549 |
| TcCLB.509819.30  | septum formation inhibitor, Maf-like protein, putative       | -0,04781 | 0,7534 |
| TcCLB.503395.10  | hypothetical protein, conserved                              | -0,04794 | 0,8158 |
| TcCLB.503973.350 | hypothetical protein                                         | -0,04794 | 0,905  |
| TcCLB.503797.4   | hypothetical protein, conserved                              | -0,04797 | 0,6825 |
| TcCLB.509671.150 | hypothetical protein, conserved                              | -0,04813 | 0,749  |
| TcCLB.508413.10  | hypothetical protein, conserved                              | -0,04837 | 0,6836 |
| TcCLB.510997.50  | ATP-dependent DEAD/H RNA helicase (pseudogene), puta         | -0,04838 | 0,7155 |
| TcCLB.510647.20  | hypothetical protein, conserved                              | -0,0484  | 0,6677 |
| TcCLB.508405.60  | hypothetical protein, conserved                              | -0,04852 | 0,6904 |
| TcCLB.510329.110 | hypothetical protein                                         | -0,04866 | 0,6475 |
| TcCLB.505999.189 | hypothetical protein, conserved (pseudogene)                 | -0,04885 | 0,8039 |
| TcCLB.508699.20  | Translation initiation factor eIF-2B subunit epsilon, putati | -0,04889 | 0,6114 |
| TcCLB.511459.70  | hypothetical protein, conserved                              | -0,04893 | 0,8802 |
| TcCLB.506945.220 | serine/arginine-rich protein specific kinase SRPK, putative  | -0,04896 | 0,5438 |
| TcCLB.506649.64  | hypothetical protein, conserved                              | -0,04901 | 0,8261 |
| TcCLB.509563.60  | hypothetical protein                                         | -0,04926 | 0,8033 |
| TcCLB.506367.70  | hypothetical protein, conserved                              | -0,04938 | 0,7209 |
| TcCLB.511813.10  | hypothetical protein, conserved                              | -0,04946 | 0,6927 |
| TcCLB.504033.190 | EF hand, putative                                            | -0,04959 | 0,7025 |
| TcCLB.509569.40  | hypothetical protein, conserved                              | -0,04975 | 0,6126 |
| TcCLB.506211.60  | RNA-binding protein, putative                                | -0,04979 | 0,6828 |
| TcCLB.509791.60  | hypothetical protein, conserved                              | -0,0498  | 0,6526 |
| TcCLB.511585.200 | hypothetical protein, conserved                              | -0,04986 | 0,6895 |
| TcCLB.510547.46  | hypothetical protein, conserved (pseudogene)                 | -0,04995 | 0,922  |
| TcCLB.509573.20  | hypothetical protein, conserved                              | -0,04997 | 0,8124 |
| TcCLB.506559.517 | hypothetical protein, conserved                              | -0,05007 | 0,6437 |
| TcCLB.511467.16  | hypothetical protein, conserved                              | -0,0502  | 0,6906 |
| TcCLB.508601.130 | Elongation factor G 2, mitochondrial, putative (EF-G2)       | -0,05055 | 0,6182 |
| TcCLB.511647.50  | hypothetical protein, conserved                              | -0,05057 | 0,7197 |
| TcCLB.508851.140 | hypothetical protein, conserved                              | -0,05062 | 0,723  |
| TcCLB.507773.10  | trans-sialidase, Group IV, putative                          | -0,05075 | 0,7275 |
| TcCLB.505071.140 | protein kinase, putative                                     | -0,05076 | 0,6965 |
| TcCLB.507011.30  | hypothetical protein, conserved                              | -0,05087 | 0,673  |
| TcCLB.509749.20  | hypothetical protein, conserved                              | -0,05092 | 0,8176 |

|                  |                                                           |          |        |
|------------------|-----------------------------------------------------------|----------|--------|
| TcCLB.417797.9   | hypothetical protein, conserved                           | -0,05099 | 0,7266 |
| TcCLB.510945.60  | hypothetical protein, conserved                           | -0,051   | 0,5843 |
| TcCLB.508505.30  | hypothetical protein, conserved                           | -0,05115 | 0,6678 |
| TcCLB.509023.90  | hypothetical protein, conserved                           | -0,05132 | 0,7972 |
| TcCLB.504157.110 | dynein intermediate chain, putative                       | -0,05136 | 0,7455 |
| TcCLB.511491.20  | hypothetical protein, conserved                           | -0,05137 | 0,5348 |
| TcCLB.507669.239 | hypothetical protein, conserved                           | -0,05149 | 0,6819 |
| TcCLB.510421.270 | hypothetical protein, conserved                           | -0,05158 | 0,7939 |
| TcCLB.507997.60  | hypothetical protein, conserved                           | -0,05168 | 0,6398 |
| TcCLB.511733.60  | hypothetical protein, conserved                           | -0,05173 | 0,7101 |
| TcCLB.509999.50  | lipase domain protein, putative                           | -0,05195 | 0,5939 |
| TcCLB.509161.50  | hypothetical protein, conserved                           | -0,05198 | 0,6772 |
| TcCLB.427789.10  | hypothetical protein, conserved                           | -0,05204 | 0,7987 |
| TcCLB.508781.30  | hypothetical protein, conserved                           | -0,05207 | 0,6715 |
| TcCLB.511803.30  | hypothetical protein, conserved                           | -0,05208 | 0,709  |
| TcCLB.506479.110 | hypothetical protein                                      | -0,05211 | 0,6377 |
| TcCLB.506673.60  | AP-3 complex subunit beta, putative (AP3B)                | -0,05215 | 0,6474 |
| TcCLB.506477.20  | vesicular-fusion protein nsf, putative                    | -0,05217 | 0,657  |
| TcCLB.472253.10  | vacuolar protein sorting complex subunit (pseudogene), pu | -0,05221 | 0,7667 |
| TcCLB.510741.90  | hypothetical protein, conserved                           | -0,05237 | 0,7522 |
| TcCLB.510001.50  | hypothetical protein, conserved                           | -0,05266 | 0,767  |
| TcCLB.510733.54  | hypothetical protein, conserved                           | -0,05271 | 0,7461 |
| TcCLB.506735.50  | hypothetical protein, conserved                           | -0,05273 | 0,6048 |
| TcCLB.503673.18  | hypothetical protein, conserved                           | -0,05285 | 0,7353 |
| TcCLB.507041.80  | hypothetical protein                                      | -0,05286 | 0,7973 |
| TcCLB.511423.100 | kinetoplast ribosomal PPR-repeat containing protein 3, pu | -0,05289 | 0,6389 |
| TcCLB.509563.10  | hypothetical protein, conserved                           | -0,05294 | 0,6596 |
| TcCLB.508075.20  | DNA repair protein, putative                              | -0,05294 | 0,6857 |
| TcCLB.511283.260 | hypothetical protein, conserved                           | -0,05296 | 0,5517 |
| TcCLB.510105.150 | hypothetical protein, conserved                           | -0,05297 | 0,7697 |
| TcCLB.508409.150 | hypothetical protein, conserved                           | -0,05298 | 0,5855 |
| TcCLB.511075.50  | hypothetical protein                                      | -0,05301 | 0,7167 |
| TcCLB.511577.19  | hypothetical protein, conserved                           | -0,05318 | 0,784  |
| TcCLB.507723.150 | hypothetical protein, conserved                           | -0,05331 | 0,6867 |
| TcCLB.505363.10  | trans-sialidase, Group II, putative                       | -0,05333 | 0,8456 |
| TcCLB.507795.80  | hypothetical protein, conserved                           | -0,05338 | 0,6512 |
| TcCLB.510597.40  | nucleoporin (NUP54/57), putative                          | -0,0534  | 0,7821 |
| TcCLB.508699.40  | eukaryotic translation initiation factor, putative        | -0,05356 | 0,6488 |
| TcCLB.509601.20  | hypothetical protein, conserved                           | -0,05361 | 0,7427 |
| TcCLB.511741.20  | hypothetical protein, conserved                           | -0,05362 | 0,6827 |
| TcCLB.506893.60  | hypothetical protein, conserved                           | -0,05368 | 0,7747 |
| TcCLB.507031.60  | nuclear cap binding complex subunit CBP30, putative (CBF  | -0,05376 | 0,696  |
| TcCLB.506335.69  | mucin-associated surface protein (MASP, pseudogene), pu   | -0,05377 | 0,8627 |
| TcCLB.511517.30  | hypothetical protein, conserved                           | -0,0538  | 0,6618 |
| TcCLB.506961.104 | ATP-dependent DEAD/H RNA helicase (pseudogene), puta      | -0,05393 | 0,8033 |

|                  |                                                            |          |        |
|------------------|------------------------------------------------------------|----------|--------|
| TcCLB.506873.10  | hypothetical protein, conserved                            | -0,054   | 0,5921 |
| TcCLB.507197.20  | oxidoreductase-like protein, putative                      | -0,05422 | 0,6192 |
| TcCLB.508251.10  | hypothetical protein                                       | -0,05427 | 0,8997 |
| TcCLB.504079.20  | hypothetical protein, conserved                            | -0,0543  | 0,7937 |
| TcCLB.506975.60  | hypothetical protein, conserved                            | -0,05432 | 0,6013 |
| TcCLB.503925.30  | protein kinase, putative                                   | -0,05438 | 0,6884 |
| TcCLB.506255.30  | hypothetical protein, conserved                            | -0,05438 | 0,8166 |
| TcCLB.511717.209 | phosphatidylinositol 3-related kinase, putative (fragment) | -0,05439 | 0,8617 |
| TcCLB.508839.60  | ADP-ribosylation factor, putative                          | -0,05455 | 0,7266 |
| TcCLB.506195.180 | hypothetical protein, conserved                            | -0,05473 | 0,7365 |
| TcCLB.508023.60  | trans-sialidase (pseudogene), putative                     | -0,05491 | 0,7197 |
| TcCLB.408345.10  | hypothetical protein, conserved                            | -0,05509 | 0,8156 |
| TcCLB.506411.20  | hypothetical protein, conserved                            | -0,05531 | 0,6685 |
| TcCLB.511751.70  | hypothetical protein, conserved                            | -0,05535 | 0,5042 |
| TcCLB.507951.15  | hypothetical protein, conserved (fragment)                 | -0,05544 | 0,5833 |
| TcCLB.506425.90  | hypothetical protein, conserved                            | -0,05553 | 0,6726 |
| TcCLB.511557.64  | hypothetical protein                                       | -0,05563 | 0,6916 |
| TcCLB.511261.130 | hypothetical protein, conserved                            | -0,0558  | 0,7558 |
| TcCLB.511043.20  | small G-protein, putative                                  | -0,05592 | 0,5604 |
| TcCLB.511239.40  | hypothetical protein, conserved                            | -0,05599 | 0,6311 |
| TcCLB.506755.150 | hypothetical protein, conserved                            | -0,05601 | 0,6886 |
| TcCLB.507677.129 | hypothetical protein, conserved                            | -0,05617 | 0,5847 |
| TcCLB.506363.120 | hypothetical protein, conserved                            | -0,05617 | 0,7013 |
| TcCLB.506247.30  | RNA editing complex protein MP63, putative                 | -0,05619 | 0,4837 |
| TcCLB.509595.70  | Trichohyalin, putative                                     | -0,05624 | 0,6098 |
| TcCLB.510265.70  | hypothetical protein, conserved                            | -0,05633 | 0,5245 |
| TcCLB.509641.40  | hypothetical protein, conserved                            | -0,05638 | 0,5327 |
| TcCLB.509065.70  | glyceraldehyde 3-phosphate dehydrogenase, putative         | -0,05638 | 0,6146 |
| TcCLB.510519.130 | hypothetical protein, conserved                            | -0,05638 | 0,6866 |
| TcCLB.511303.140 | hypothetical protein, conserved                            | -0,05641 | 0,6239 |
| TcCLB.511313.30  | formin, putative                                           | -0,05651 | 0,7801 |
| TcCLB.509809.30  | hypothetical protein, conserved                            | -0,05652 | 0,5272 |
| TcCLB.510099.110 | hypothetical protein, conserved                            | -0,05657 | 0,5782 |
| TcCLB.511741.30  | replication factor C, subunit 2, putative                  | -0,05672 | 0,6193 |
| TcCLB.508165.330 | trans-sialidase (pseudogene), putative                     | -0,05673 | 0,8202 |
| TcCLB.508573.120 | dispersed gene family protein 1 (DGF-1), putative          | -0,05679 | 0,8466 |
| TcCLB.510149.20  | hypothetical protein, conserved                            | -0,05688 | 0,6531 |
| TcCLB.511037.30  | hypothetical protein, conserved                            | -0,0569  | 0,5473 |
| TcCLB.510101.450 | hypothetical protein, conserved                            | -0,05691 | 0,5556 |
| TcCLB.511585.70  | heat shock protein 70 (hsp70), putative                    | -0,05695 | 0,5787 |
| TcCLB.508055.30  | trans-sialidase, Group II, putative                        | -0,05696 | 0,806  |
| TcCLB.506559.559 | antigenic protein, putative                                | -0,05701 | 0,5931 |
| TcCLB.507001.40  | hypothetical protein, conserved                            | -0,05701 | 0,5979 |
| TcCLB.510185.10  | sterol 24-c-methyltransferase, putative                    | -0,05705 | 0,6714 |
| TcCLB.408573.5   | hypothetical protein                                       | -0,05705 | 0,8978 |

|                  |                                                             |          |        |
|------------------|-------------------------------------------------------------|----------|--------|
| TcCLB.508553.10  | dispersed gene family protein 1 (DGF-1, pseudogene), put    | -0,05709 | 0,797  |
| TcCLB.439125.10  | Peptide chain release factor 1, mitochondrial, putative (RI | -0,05738 | 0,7078 |
| TcCLB.454403.10  | trans-sialidase (pseudogene), putative                      | -0,0574  | 0,6166 |
| TcCLB.511289.119 | C-terminal motor kinesin, putative (fragment)               | -0,05771 | 0,6797 |
| TcCLB.506335.110 | trans-sialidase (pseudogene), putative                      | -0,05774 | 0,8055 |
| TcCLB.508637.110 | nucleotide-binding protein, putative                        | -0,05775 | 0,6986 |
| TcCLB.510075.30  | hypothetical protein, conserved                             | -0,05776 | 0,5776 |
| TcCLB.507025.20  | hypothetical protein, conserved                             | -0,0578  | 0,6858 |
| TcCLB.506201.140 | hypothetical protein, conserved                             | -0,05796 | 0,5426 |
| TcCLB.506941.50  | hypothetical protein, conserved                             | -0,05798 | 0,6296 |
| TcCLB.509859.60  | hypothetical protein, conserved                             | -0,0581  | 0,5924 |
| TcCLB.506925.80  | hypothetical protein, conserved                             | -0,05824 | 0,5991 |
| TcCLB.506007.40  | protein kinase, putative                                    | -0,05841 | 0,6245 |
| TcCLB.506871.160 | RNA guanylyltransferase, putative                           | -0,05843 | 0,5782 |
| TcCLB.508857.40  | UDP-glucuronosyl and UDP-glucosyl transferase, putative     | -0,05851 | 0,7113 |
| TcCLB.504867.80  | DNA primase large subunit, putative (pril)                  | -0,05869 | 0,6575 |
| TcCLB.510629.440 | hypothetical protein, conserved                             | -0,05872 | 0,4998 |
| TcCLB.510963.60  | hypothetical protein, conserved                             | -0,05873 | 0,6605 |
| TcCLB.510487.37  | trans-sialidase (pseudogene), putative                      | -0,05889 | 0,8261 |
| TcCLB.510579.119 | hypothetical protein, conserved                             | -0,05912 | 0,6588 |
| TcCLB.508891.20  | hypothetical protein, conserved                             | -0,05921 | 0,5963 |
| TcCLB.506435.30  | mitochondrial DNA polymerase I protein A, putative          | -0,05945 | 0,5674 |
| TcCLB.511019.108 | hypothetical protein, conserved                             | -0,05947 | 0,6904 |
| TcCLB.506943.90  | hypothetical protein, conserved                             | -0,0595  | 0,7361 |
| TcCLB.506885.270 | tubulin tyrosine ligase, putative                           | -0,05951 | 0,6011 |
| TcCLB.503891.40  | hypothetical protein, conserved                             | -0,05954 | 0,6075 |
| TcCLB.506223.70  | hypothetical protein                                        | -0,05961 | 0,7741 |
| TcCLB.509695.30  | hypothetical protein, conserved                             | -0,05965 | 0,7212 |
| TcCLB.506559.360 | hypothetical protein, conserved                             | -0,05973 | 0,5715 |
| TcCLB.509985.30  | hypothetical protein, conserved                             | -0,05992 | 0,6824 |
| TcCLB.507031.170 | protein kinase (pseudogene), putative                       | -0,06    | 0,5951 |
| TcCLB.511473.9   | N-acetyltransferase complex ARD1 subunit (pseudogene),      | -0,06007 | 0,8083 |
| TcCLB.511271.10  | dispersed gene family protein 1 (DGF-1, pseudogene), put    | -0,06008 | 0,7902 |
| TcCLB.508159.26  | hypothetical protein, conserved (pseudogene)                | -0,06009 | 0,8037 |
| TcCLB.508641.90  | hypothetical protein, conserved                             | -0,06017 | 0,5645 |
| TcCLB.508153.440 | polynucleotide adenylyltransferase, putative (PAP)          | -0,06017 | 0,6609 |
| TcCLB.507483.4   | polyubiquitin (pseudogene), putative                        | -0,06027 | 0,7977 |
| TcCLB.507641.170 | hypothetical protein, conserved                             | -0,06029 | 0,5773 |
| TcCLB.508153.220 | hypothetical protein, conserved                             | -0,06052 | 0,6389 |
| TcCLB.508681.31  | hypothetical protein                                        | -0,06055 | 0,8613 |
| TcCLB.509153.30  | hypothetical protein, conserved                             | -0,06057 | 0,4704 |
| TcCLB.508831.40  | hypothetical protein, conserved                             | -0,0606  | 0,7685 |
| TcCLB.506625.210 | hypothetical protein, conserved                             | -0,06063 | 0,645  |
| TcCLB.504827.90  | hypothetical protein, conserved                             | -0,06075 | 0,6783 |
| TcCLB.510359.540 | hypothetical protein                                        | -0,06085 | 0,8984 |

|                  |                                                         |          |        |
|------------------|---------------------------------------------------------|----------|--------|
| TcCLB.506265.170 | hypothetical protein, conserved                         | -0,06094 | 0,6584 |
| TcCLB.510279.263 | trans-sialidase (pseudogene), putative                  | -0,06094 | 0,8542 |
| TcCLB.511283.200 | hypothetical protein, conserved                         | -0,06098 | 0,5097 |
| TcCLB.509065.180 | protein kinase-like protein, putative                   | -0,061   | 0,5762 |
| TcCLB.509073.30  | ubiquitin hydrolase, putative                           | -0,06108 | 0,5448 |
| TcCLB.508445.80  | hypothetical protein, conserved                         | -0,06122 | 0,6046 |
| TcCLB.509063.2   | hypothetical protein, conserved (fragment)              | -0,06124 | 0,8638 |
| TcCLB.503987.30  | Enriched in surface-labeled proteome protein 16 (ESP16) | -0,06128 | 0,5961 |
| TcCLB.510155.180 | eukaryotic initiation factor 4a, putative               | -0,0614  | 0,5372 |
| TcCLB.503841.60  | hypothetical protein, conserved                         | -0,06154 | 0,6518 |
| TcCLB.511803.50  | hypothetical protein, conserved                         | -0,06175 | 0,6938 |
| TcCLB.509047.100 | hypothetical protein, conserved                         | -0,06181 | 0,6699 |
| TcCLB.508965.50  | hypothetical protein, conserved                         | -0,06209 | 0,6086 |
| TcCLB.506359.99  | hypothetical protein                                    | -0,06216 | 0,7387 |
| TcCLB.507305.30  | casein kinase, putative                                 | -0,06217 | 0,7748 |
| TcCLB.510729.180 | hypothetical protein                                    | -0,06228 | 0,5879 |
| TcCLB.503691.9   | hypothetical protein, conserved (fragment)              | -0,06228 | 0,7226 |
| TcCLB.511715.80  | hypothetical protein, conserved                         | -0,06234 | 0,6133 |
| TcCLB.509991.20  | conserved protein, unknown function                     | -0,06263 | 0,5426 |
| TcCLB.508233.40  | hypothetical protein                                    | -0,06266 | 0,6432 |
| TcCLB.509885.60  | methyltransferase, putative                             | -0,06267 | 0,7071 |
| TcCLB.511141.30  | protein kinase, putative                                | -0,06269 | 0,7602 |
| TcCLB.503557.10  | hypothetical protein, conserved                         | -0,06271 | 0,697  |
| TcCLB.511749.9   | hypothetical protein, conserved (fragment)              | -0,06272 | 0,5047 |
| TcCLB.510257.70  | hypothetical protein, conserved                         | -0,06273 | 0,5397 |
| TcCLB.506355.150 | hypothetical protein, conserved                         | -0,06273 | 0,6872 |
| TcCLB.508181.149 | hypothetical protein, conserved                         | -0,0629  | 0,7939 |
| TcCLB.511309.80  | trans-sialidase (pseudogene), putative                  | -0,06301 | 0,7009 |
| TcCLB.503593.20  | hypothetical protein, conserved                         | -0,06306 | 0,5882 |
| TcCLB.507039.20  | GDP-mannose 4,6 dehydratase (pseudogene), putative      | -0,06326 | 0,6867 |
| TcCLB.511263.50  | hypothetical protein, conserved                         | -0,06328 | 0,785  |
| TcCLB.506637.90  | hypothetical protein, conserved                         | -0,06331 | 0,519  |
| TcCLB.506649.4   | hypothetical protein, conserved                         | -0,06335 | 0,7264 |
| TcCLB.506529.480 | hypothetical protein, conserved                         | -0,06352 | 0,6077 |
| TcCLB.511729.30  | hypothetical protein, conserved                         | -0,06357 | 0,616  |
| TcCLB.509223.80  | trans-sialidase (pseudogene), putative                  | -0,06358 | 0,7074 |
| TcCLB.504247.20  | ATP-dependent RNA helicase, putative                    | -0,06362 | 0,5154 |
| TcCLB.511755.24  | hypothetical protein, conserved (pseudogene)            | -0,06364 | 0,7018 |
| TcCLB.509965.400 | hypothetical protein, conserved                         | -0,06372 | 0,5514 |
| TcCLB.504213.20  | hypothetical protein, conserved                         | -0,06376 | 0,516  |
| TcCLB.511621.130 | hypothetical protein, conserved                         | -0,0638  | 0,5664 |
| TcCLB.510229.20  | 8-oxoguanine DNA glycosylase, putative                  | -0,06382 | 0,6683 |
| TcCLB.508721.20  | hypothetical protein, conserved                         | -0,06388 | 0,6315 |
| TcCLB.506575.54  | hypothetical protein, conserved                         | -0,06392 | 0,7487 |
| TcCLB.505101.30  | hypothetical protein, conserved                         | -0,06403 | 0,8781 |



|                  |                                                           |          |        |
|------------------|-----------------------------------------------------------|----------|--------|
| TcCLB.511825.90  | hypothetical protein, conserved                           | -0,06416 | 0,7333 |
| TcCLB.510143.30  | hypothetical protein, conserved                           | -0,06435 | 0,5855 |
| TcCLB.506833.60  | UV excision repair RAD23-like protein, putative           | -0,06445 | 0,495  |
| TcCLB.510131.60  | hypothetical protein                                      | -0,06447 | 0,6477 |
| TcCLB.504043.10  | hypothetical protein, conserved                           | -0,06454 | 0,5227 |
| TcCLB.511517.10  | hypothetical protein, conserved                           | -0,0646  | 0,6734 |
| TcCLB.506839.34  | oxidoreductase, putative                                  | -0,06472 | 0,7709 |
| TcCLB.506629.240 | retrotransposon hot spot (RHS) protein, putative (fragmer | -0,06484 | 0,878  |
| TcCLB.511859.20  | hypothetical protein, conserved                           | -0,06489 | 0,6223 |
| TcCLB.508851.170 | DNA topoisomerase III, putative                           | -0,06494 | 0,5669 |
| TcCLB.508647.190 | hypothetical protein, conserved                           | -0,06498 | 0,5889 |
| TcCLB.509971.70  | hypothetical protein                                      | -0,06505 | 0,8203 |
| TcCLB.511277.39  | hypothetical protein, conserved                           | -0,06511 | 0,7815 |
| TcCLB.510201.45  | hypothetical protein, conserved (pseudogene)              | -0,06512 | 0,7506 |
| TcCLB.506853.30  | arginine N-methyltransferase, type II, putative (PRMT5)   | -0,06519 | 0,6009 |
| TcCLB.510957.9   | calpain-like cysteine peptidase, putative                 | -0,06522 | 0,4272 |
| TcCLB.510149.110 | phosphate transporter, putative                           | -0,06529 | 0,5833 |
| TcCLB.506587.100 | surface protease GP63, putative                           | -0,06533 | 0,5945 |
| TcCLB.508503.70  | hypothetical protein, conserved                           | -0,06556 | 0,571  |
| TcCLB.503641.10  | hypothetical protein, conserved                           | -0,06556 | 0,5805 |
| TcCLB.506885.364 | hypothetical protein, conserved                           | -0,06563 | 0,6893 |
| TcCLB.506963.80  | hypothetical protein, conserved                           | -0,06566 | 0,4973 |
| TcCLB.506559.370 | hypothetical protein, conserved                           | -0,06579 | 0,5691 |
| TcCLB.428999.10  | hypothetical protein                                      | -0,0658  | 0,6623 |
| TcCLB.504557.60  | hypothetical protein, conserved                           | -0,06583 | 0,702  |
| TcCLB.507835.80  | trans-sialidase, putative                                 | -0,06583 | 0,8304 |
| TcCLB.510627.215 | hypothetical protein, conserved (pseudogene)              | -0,06584 | 0,9185 |
| TcCLB.509161.70  | Mg transporter, putative                                  | -0,06591 | 0,5775 |
| TcCLB.506495.30  | retrotransposon hot spot protein (RHS, pseudogene), puta  | -0,06594 | 0,7356 |
| TcCLB.507011.250 | hypothetical protein, conserved                           | -0,06606 | 0,4365 |
| TcCLB.506127.70  | hypothetical protein                                      | -0,06612 | 0,5692 |
| TcCLB.509901.140 | COP9 signalosome complex subunit 5, putative              | -0,06633 | 0,6079 |
| TcCLB.507611.114 | retrotransposon hot spot protein (RHS, pseudogene), puta  | -0,06639 | 0,7611 |
| TcCLB.506667.5   | surface protease GP63 (pseudogene), putative              | -0,06645 | 0,8823 |
| TcCLB.506793.100 | hypothetical protein, conserved                           | -0,06651 | 0,5614 |
| TcCLB.509033.50  | hypothetical protein, conserved                           | -0,06652 | 0,4967 |
| TcCLB.511411.30  | arginine permease (AAAP411)                               | -0,06662 | 0,8618 |
| TcCLB.509569.80  | hypothetical protein                                      | -0,06669 | 0,6345 |
| TcCLB.506559.380 | centrin, putative                                         | -0,06679 | 0,5913 |
| TcCLB.511499.30  | RNA decapping enzyme, putative (Dcp2)                     | -0,06687 | 0,7015 |
| TcCLB.506745.4   | hypothetical protein, conserved (fragment)                | -0,06693 | 0,8473 |
| TcCLB.511821.130 | hypothetical protein                                      | -0,06707 | 0,5421 |
| TcCLB.508119.11  | surface protease GP63 (pseudogene), putative              | -0,06717 | 0,7377 |
| TcCLB.509967.150 | hypothetical protein, conserved                           | -0,0673  | 0,5919 |
| TcCLB.505071.119 | hypothetical protein, conserved                           | -0,06736 | 0,626  |

|                  |                                                              |          |        |
|------------------|--------------------------------------------------------------|----------|--------|
| TcCLB.507001.10  | hypothetical protein, conserved                              | -0,06744 | 0,5048 |
| TcCLB.509551.90  | hypothetical protein, conserved                              | -0,06746 | 0,6308 |
| TcCLB.509745.10  | hypothetical protein, conserved                              | -0,06758 | 0,4922 |
| TcCLB.506797.100 | beta-ketoacyl-ACP reductase 2, putative                      | -0,06758 | 0,5844 |
| TcCLB.506509.30  | hypothetical protein, conserved                              | -0,06778 | 0,5507 |
| TcCLB.510879.70  | selenocysteine-tRNA-specific elongation factor, putative     | -0,0679  | 0,5531 |
| TcCLB.504045.90  | hypothetical protein, conserved (pseudogene)                 | -0,06822 | 0,6369 |
| TcCLB.510531.30  | hypothetical protein, conserved                              | -0,06827 | 0,515  |
| TcCLB.511717.140 | hypothetical protein, conserved                              | -0,0683  | 0,6588 |
| TcCLB.507061.30  | iron superoxide dismutase, putative                          | -0,06833 | 0,7009 |
| TcCLB.424123.30  | hypothetical protein, conserved                              | -0,06843 | 0,6397 |
| TcCLB.511233.50  | hypothetical protein, conserved                              | -0,06876 | 0,5892 |
| TcCLB.505193.74  | hypothetical protein, conserved                              | -0,06879 | 0,5715 |
| TcCLB.506167.50  | clathrin heavy chain, putative                               | -0,06885 | 0,3979 |
| TcCLB.506575.50  | hypothetical protein, conserved                              | -0,06887 | 0,4683 |
| TcCLB.511217.110 | hypothetical protein, conserved                              | -0,06891 | 0,5295 |
| TcCLB.511809.50  | hypothetical protein, conserved                              | -0,06892 | 0,6149 |
| TcCLB.507989.10  | hypothetical protein, conserved                              | -0,06898 | 0,5829 |
| TcCLB.506519.70  | hypothetical protein                                         | -0,06899 | 0,6818 |
| TcCLB.511291.10  | intraflagellar transport protein 80, putative (fragment) (IF | -0,06915 | 0,6342 |
| TcCLB.509921.40  | retrotransposon hot spot protein (RHS, pseudogene), puta     | -0,06928 | 0,6224 |
| TcCLB.509801.30  | citrate synthase, putative                                   | -0,06928 | 0,8106 |
| TcCLB.508515.10  | hypothetical protein, conserved                              | -0,06929 | 0,692  |
| TcCLB.509417.30  | retrotransposon hot spot protein (RHS, pseudogene), puta     | -0,06933 | 0,799  |
| TcCLB.510657.220 | hypothetical protein, conserved                              | -0,06942 | 0,6648 |
| TcCLB.507601.30  | hypothetical protein, conserved                              | -0,06956 | 0,6937 |
| TcCLB.504059.24  | hypothetical protein, conserved                              | -0,0696  | 0,7071 |
| TcCLB.509721.79  | hypothetical protein, conserved (fragment)                   | -0,06972 | 0,5369 |
| TcCLB.511365.10  | hypothetical protein, conserved                              | -0,06974 | 0,5828 |
| TcCLB.510523.20  | hypothetical protein, conserved                              | -0,06981 | 0,6231 |
| TcCLB.507927.4   | rac serine-threonine kinase, putative                        | -0,06981 | 0,6447 |
| TcCLB.510081.21  | ATP-dependent DEAD/H RNA helicase (pseudogene), puta         | -0,06983 | 0,7655 |
| TcCLB.510897.99  | hypothetical protein, conserved (fragment)                   | -0,06985 | 0,7383 |
| TcCLB.503651.20  | hypothetical protein                                         | -0,06992 | 0,6269 |
| TcCLB.511001.50  | hypothetical protein, conserved                              | -0,06994 | 0,5924 |
| TcCLB.503423.30  | hypothetical protein, conserved                              | -0,07014 | 0,7987 |
| TcCLB.508293.111 | elongation factor 1-gamma (EF-1-gamma, pseudogene),          | -0,07015 | 0,8754 |
| TcCLB.510989.69  | hypothetical protein, conserved                              | -0,07019 | 0,732  |
| TcCLB.510687.100 | Unc104-like kinesin, putative                                | -0,07037 | 0,4784 |
| TcCLB.510557.73  | mucin-associated surface protein (MASP, pseudogene), pi      | -0,07043 | 0,8276 |
| TcCLB.506861.20  | hypothetical protein, conserved                              | -0,07056 | 0,5511 |
| TcCLB.506945.250 | hypothetical protein, conserved                              | -0,07066 | 0,4574 |
| TcCLB.506363.30  | hypothetical protein, conserved                              | -0,07068 | 0,4928 |
| TcCLB.509999.70  | hypothetical protein, conserved                              | -0,0707  | 0,5359 |
| TcCLB.507021.100 | hypothetical protein, conserved                              | -0,07073 | 0,5224 |

|                  |                                                             |          |        |
|------------------|-------------------------------------------------------------|----------|--------|
| TcCLB.504247.30  | transcription elongation factor 1 homolog (ELOF1)           | -0,07081 | 0,6779 |
| TcCLB.506211.70  | RNA-binding protein, putative                               | -0,07083 | 0,5248 |
| TcCLB.506537.50  | retrotransposon hot spot (RHS) protein, putative            | -0,07083 | 0,8094 |
| TcCLB.460197.10  | cysteine peptidase (pseudogene), putative                   | -0,07084 | 0,7804 |
| TcCLB.509669.80  | hypothetical protein, conserved                             | -0,07099 | 0,7208 |
| TcCLB.508525.40  | hypothetical protein, conserved                             | -0,071   | 0,5543 |
| TcCLB.510329.30  | hypothetical protein, conserved                             | -0,07108 | 0,5235 |
| TcCLB.507389.70  | peptidase, putative                                         | -0,0711  | 0,3905 |
| TcCLB.506489.50  | serine/threonine protein kinase, putative                   | -0,07111 | 0,6384 |
| TcCLB.509877.89  | hypothetical protein, conserved                             | -0,07121 | 0,686  |
| TcCLB.510741.30  | hypothetical protein, conserved                             | -0,07136 | 0,4899 |
| TcCLB.511365.100 | hypothetical protein, conserved                             | -0,07137 | 0,6636 |
| TcCLB.510029.60  | Vesicle-trafficking protein SEC22, putative (SEC22)         | -0,07143 | 0,5971 |
| TcCLB.506195.80  | adenylate kinase, putative                                  | -0,07149 | 0,6321 |
| TcCLB.510295.15  | hypothetical protein, conserved                             | -0,07157 | 0,6082 |
| TcCLB.511143.12  | hypothetical protein, conserved                             | -0,07162 | 0,5243 |
| TcCLB.511071.150 | hypothetical protein, conserved                             | -0,0717  | 0,6182 |
| TcCLB.507053.150 | hypothetical protein, conserved                             | -0,07171 | 0,5158 |
| TcCLB.508899.70  | hypothetical protein, conserved                             | -0,07182 | 0,595  |
| TcCLB.507971.29  | hypothetical protein, conserved                             | -0,07187 | 0,6844 |
| TcCLB.509835.20  | guanine nucleotide exchange factor subunit GCD2             | -0,07201 | 0,6013 |
| TcCLB.510861.150 | hypothetical protein                                        | -0,07211 | 0,4062 |
| TcCLB.506879.100 | hypothetical protein, conserved                             | -0,07213 | 0,7082 |
| TcCLB.506941.194 | hypothetical protein, conserved                             | -0,07217 | 0,4142 |
| TcCLB.508693.70  | hypothetical protein, conserved                             | -0,07244 | 0,5866 |
| TcCLB.507081.139 | hypothetical protein, conserved (fragment)                  | -0,07267 | 0,5068 |
| TcCLB.506289.74  | chaperone DNAJ protein, putative                            | -0,07282 | 0,5744 |
| TcCLB.508909.270 | hypothetical protein, conserved                             | -0,07283 | 0,4825 |
| TcCLB.504157.80  | hypothetical protein, conserved                             | -0,0729  | 0,4712 |
| TcCLB.507093.190 | hypothetical protein, conserved                             | -0,07295 | 0,6451 |
| TcCLB.509979.130 | hypothetical protein, conserved                             | -0,07308 | 0,4078 |
| TcCLB.506989.270 | hypothetical protein, conserved                             | -0,07312 | 0,8769 |
| TcCLB.510027.20  | transporter, putative                                       | -0,07335 | 0,5964 |
| TcCLB.503877.10  | hypothetical protein, conserved                             | -0,07385 | 0,642  |
| TcCLB.510173.60  | intraflagellar transport protein 122B, putative (IFT122B)   | -0,07387 | 0,4349 |
| TcCLB.506591.130 | hypothetical protein, conserved                             | -0,07389 | 0,5636 |
| TcCLB.504625.80  | hypothetical protein, conserved                             | -0,0739  | 0,5544 |
| TcCLB.506363.150 | soluble N-ethylmaleimide sensitive factor (NSF) attachment  | -0,07393 | 0,6202 |
| TcCLB.509777.130 | inositol phosphosphingolipid phospholipase C-Like, putative | -0,07396 | 0,5014 |
| TcCLB.508119.90  | surface protease GP63 (pseudogene), putative                | -0,07398 | 0,4969 |
| TcCLB.508299.89  | hypothetical protein, conserved                             | -0,07408 | 0,6685 |
| TcCLB.503721.30  | hypothetical protein, conserved                             | -0,0741  | 0,459  |
| TcCLB.506755.250 | mitochondrial import inner membrane translocase subunit     | -0,0741  | 0,5034 |
| TcCLB.506529.500 | hypothetical protein, conserved                             | -0,07415 | 0,5588 |
| TcCLB.504131.170 | ubiquitin carboxyl-terminal hydrolase, putative             | -0,07416 | 0,4999 |

|                  |                                                          |          |        |
|------------------|----------------------------------------------------------|----------|--------|
| TcCLB.509179.80  | hypothetical protein, conserved                          | -0,0742  | 0,6994 |
| TcCLB.468803.10  | surface protease GP63, putative                          | -0,07423 | 0,8042 |
| TcCLB.511407.10  | nuclear transport factor 2, putative                     | -0,07429 | 0,5135 |
| TcCLB.510691.80  | hypothetical protein, conserved                          | -0,07434 | 0,6466 |
| TcCLB.509579.32  | N-acetyltransferase complex ARD1 subunit (pseudogene),   | -0,07446 | 0,8117 |
| TcCLB.509033.44  | hypothetical protein, conserved                          | -0,07446 | 0,8231 |
| TcCLB.507011.210 | hypothetical protein, conserved                          | -0,07468 | 0,5145 |
| TcCLB.511911.81  | hypothetical protein, conserved (pseudogene)             | -0,0747  | 0,7233 |
| TcCLB.511511.30  | hypothetical protein, conserved                          | -0,07474 | 0,5021 |
| TcCLB.503839.19  | hypothetical protein, conserved                          | -0,07476 | 0,5592 |
| TcCLB.509105.60  | adenosine deaminase-like protein, putative (ADAT1h)      | -0,0748  | 0,5756 |
| TcCLB.503809.40  | protein kinase, putative                                 | -0,0748  | 0,6596 |
| TcCLB.509601.80  | hypothetical protein, conserved                          | -0,07485 | 0,5339 |
| TcCLB.511071.130 | Trypanosome basal body component protein (TBBC)          | -0,07487 | 0,416  |
| TcCLB.507021.10  | hypothetical protein, conserved                          | -0,07499 | 0,5703 |
| TcCLB.510285.130 | hypothetical protein, conserved                          | -0,07507 | 0,6146 |
| TcCLB.507019.90  | hypothetical protein, conserved                          | -0,07514 | 0,6836 |
| TcCLB.511921.10  | hypothetical protein, conserved (pseudogene)             | -0,07532 | 0,7432 |
| TcCLB.508219.30  | surface protease GP63 (pseudogene), putative             | -0,07533 | 0,875  |
| TcCLB.504185.40  | hypothetical protein, conserved                          | -0,07552 | 0,5374 |
| TcCLB.511349.80  | retrotransposon hot spot protein (RHS, pseudogene), puta | -0,07558 | 0,8707 |
| TcCLB.511753.110 | hypothetical protein, conserved                          | -0,07563 | 0,3744 |
| TcCLB.506625.50  | hypothetical protein                                     | -0,07564 | 0,8083 |
| TcCLB.509231.20  | protein kinase, putative                                 | -0,07573 | 0,5326 |
| TcCLB.506841.12  | hypothetical protein, conserved                          | -0,07577 | 0,5999 |
| TcCLB.508461.142 | hypothetical protein                                     | -0,07582 | 0,52   |
| TcCLB.511189.60  | hypothetical protein, conserved                          | -0,07584 | 0,528  |
| TcCLB.511269.4   | Ras-related protein Rab5A, putative (RAB5A)              | -0,07587 | 0,5018 |
| TcCLB.506247.40  | hypothetical protein, conserved                          | -0,07601 | 0,555  |
| TcCLB.503893.60  | hypothetical protein, conserved                          | -0,07613 | 0,5283 |
| TcCLB.509911.4   | hypothetical protein, conserved                          | -0,07614 | 0,6636 |
| TcCLB.508277.390 | hypothetical protein, conserved                          | -0,07615 | 0,4086 |
| TcCLB.509825.30  | hypothetical protein, conserved                          | -0,07617 | 0,5476 |
| TcCLB.509941.100 | 2,4-dienoyl-coa reductase fadh1, putative                | -0,07627 | 0,4441 |
| TcCLB.504069.100 | RNA polymerase II, putative                              | -0,07627 | 0,5607 |
| TcCLB.510337.50  | hypothetical protein, conserved (pseudogene)             | -0,07633 | 0,6701 |
| TcCLB.507735.30  | hypothetical protein, conserved                          | -0,07634 | 0,591  |
| TcCLB.507063.140 | hypothetical protein, conserved                          | -0,07635 | 0,6719 |
| TcCLB.510421.70  | hypothetical protein, conserved                          | -0,0764  | 0,5703 |
| TcCLB.508909.210 | hypothetical protein, conserved                          | -0,07652 | 0,4339 |
| TcCLB.511019.47  | N-acetyltransferase complex ARD1 subunit (pseudogene),   | -0,07673 | 0,7457 |
| TcCLB.507631.10  | hypothetical protein, conserved                          | -0,07676 | 0,738  |
| TcCLB.504149.140 | hypothetical protein, conserved                          | -0,07693 | 0,4295 |
| TcCLB.510661.230 | hypothetical protein, conserved                          | -0,07696 | 0,4283 |
| TcCLB.507841.30  | hypothetical protein, conserved                          | -0,07703 | 0,7037 |

|                  |                                                              |          |        |
|------------------|--------------------------------------------------------------|----------|--------|
| TcCLB.508479.83  | N-acetyltransferase complex ARD1 subunit (pseudogene),       | -0,07706 | 0,8039 |
| TcCLB.507941.10  | hypothetical protein, conserved                              | -0,07716 | 0,4292 |
| TcCLB.506733.90  | hypothetical protein, conserved                              | -0,07723 | 0,4684 |
| TcCLB.508153.810 | hypothetical protein, conserved                              | -0,07737 | 0,6188 |
| TcCLB.507709.140 | hypothetical protein, conserved                              | -0,0774  | 0,5702 |
| TcCLB.509695.220 | serine carboxypeptidase (CBP1), putative                     | -0,07743 | 0,5842 |
| TcCLB.510635.30  | dispersed gene family protein 1 (DGF-1, pseudogene), put     | -0,07746 | 0,8085 |
| TcCLB.510323.50  | hypothetical protein, conserved                              | -0,07749 | 0,6263 |
| TcCLB.509649.30  | 19S proteasome non-atpase subunit 8 (Rpn8)                   | -0,07769 | 0,4612 |
| TcCLB.510943.100 | acetyltransferase, putative                                  | -0,07773 | 0,6204 |
| TcCLB.508779.40  | hypothetical protein, conserved                              | -0,07777 | 0,5763 |
| TcCLB.508823.152 | hypothetical protein (fragment)                              | -0,07787 | 0,5404 |
| TcCLB.511277.115 | hypothetical protein, conserved                              | -0,07804 | 0,378  |
| TcCLB.511809.40  | hypothetical protein, conserved                              | -0,07817 | 0,5201 |
| TcCLB.511499.20  | hypothetical protein, conserved                              | -0,0782  | 0,5531 |
| TcCLB.503895.19  | hypothetical protein                                         | -0,07822 | 0,3985 |
| TcCLB.506727.90  | enoyl-CoA hydratase/isomerase family protein, putative       | -0,07824 | 0,5238 |
| TcCLB.474887.9   | pseudouridine synthase TruD, putative (fragment)             | -0,07829 | 0,5747 |
| TcCLB.507011.40  | hypothetical protein, conserved                              | -0,07842 | 0,5048 |
| TcCLB.507831.100 | hypothetical protein, conserved                              | -0,07844 | 0,5295 |
| TcCLB.511523.4   | hypothetical protein, conserved                              | -0,07852 | 0,534  |
| TcCLB.507623.120 | hypothetical protein, conserved                              | -0,07852 | 0,6087 |
| TcCLB.511285.4   | intraflagellar transport protein 140, putative (fragment) (I | -0,07859 | 0,52   |
| TcCLB.507517.90  | nucleotide-binding protein, putative                         | -0,07893 | 0,5338 |
| TcCLB.510661.244 | hypothetical protein, conserved                              | -0,07899 | 0,5968 |
| TcCLB.511367.210 | ubiquitin-conjugating enzyme variant Kua homologue, put      | -0,07906 | 0,6559 |
| TcCLB.510121.9   | hypothetical protein, conserved                              | -0,07907 | 0,6872 |
| TcCLB.507023.260 | hypothetical protein, conserved                              | -0,0791  | 0,5082 |
| TcCLB.508881.60  | hypothetical protein, conserved                              | -0,07915 | 0,5478 |
| TcCLB.508205.4   | hypothetical protein, conserved                              | -0,07935 | 0,6644 |
| TcCLB.454391.10  | trans-sialidase (pseudogene), putative                       | -0,07942 | 0,5035 |
| TcCLB.508641.140 | hypothetical protein, conserved                              | -0,07963 | 0,6156 |
| TcCLB.508999.190 | calpain-like cysteine peptidase, putative                    | -0,07964 | 0,351  |
| TcCLB.506671.61  | hypothetical protein, conserved (pseudogene)                 | -0,07976 | 0,7209 |
| TcCLB.507029.41  | hypothetical protein                                         | -0,0798  | 0,7509 |
| TcCLB.508209.30  | hypothetical protein, conserved                              | -0,0799  | 0,381  |
| TcCLB.507673.30  | hypothetical protein, conserved                              | -0,07992 | 0,5383 |
| TcCLB.505183.120 | aldo/keto reductase, putative                                | -0,08001 | 0,5683 |
| TcCLB.510687.94  | Unc104-like kinesin, putative                                | -0,08013 | 0,5419 |
| TcCLB.504153.70  | hypothetical protein, conserved                              | -0,08014 | 0,4485 |
| TcCLB.506929.60  | ATP-dependent DEAD/H RNA helicase (pseudogene), puta         | -0,0802  | 0,6114 |
| TcCLB.509109.110 | hypothetical protein, conserved                              | -0,08021 | 0,6538 |
| TcCLB.510531.100 | hypothetical protein, conserved                              | -0,08024 | 0,3818 |
| TcCLB.508307.125 | hypothetical protein, conserved                              | -0,08024 | 0,5452 |
| TcCLB.506627.100 | hypothetical protein, conserved                              | -0,08039 | 0,5916 |

|                  |                                                          |          |        |
|------------------|----------------------------------------------------------|----------|--------|
| TcCLB.511585.180 | hypothetical protein, conserved                          | -0,08049 | 0,6596 |
| TcCLB.506753.170 | ubiquinone biosynthesis protein-like protein, putative   | -0,08053 | 0,4937 |
| TcCLB.506679.60  | hypothetical protein, conserved                          | -0,08063 | 0,5069 |
| TcCLB.509251.98  | hypothetical protein, conserved (pseudogene)             | -0,08078 | 0,806  |
| TcCLB.433717.10  | dispersed gene family protein 1 (DGF-1, pseudogene), put | -0,08088 | 0,7794 |
| TcCLB.510731.110 | hypothetical protein, conserved                          | -0,08095 | 0,5908 |
| TcCLB.507825.20  | RNA helicase, putative                                   | -0,08117 | 0,3146 |
| TcCLB.508597.9   | retrotransposon hot spot (RHS) protein, putative         | -0,08128 | 0,6255 |
| TcCLB.508411.20  | hypothetical protein, conserved                          | -0,08133 | 0,5595 |
| TcCLB.508465.149 | hypothetical protein, conserved (fragment)               | -0,08135 | 0,6032 |
| TcCLB.509805.240 | hypothetical protein, conserved (pseudogene)             | -0,08144 | 0,5669 |
| TcCLB.508461.100 | Bardet-Biedl syndrome 1 protein homolog (BBS1-like prot  | -0,08146 | 0,5231 |
| TcCLB.511255.320 | surface protease GP63, putative                          | -0,08146 | 0,9033 |
| TcCLB.509979.365 | surface protease GP63 (pseudogene), putative             | -0,08147 | 0,8226 |
| TcCLB.511445.70  | hypothetical protein, conserved                          | -0,08152 | 0,4511 |
| TcCLB.508153.380 | RNA polymerase-associated protein CTR9, putative         | -0,08159 | 0,3817 |
| TcCLB.510515.120 | hypothetical protein, conserved                          | -0,08173 | 0,7522 |
| TcCLB.510527.9   | kinesin, putative                                        | -0,08178 | 0,5777 |
| TcCLB.509017.24  | hypothetical protein, conserved                          | -0,08184 | 0,4991 |
| TcCLB.506681.24  | hypothetical protein, conserved                          | -0,08193 | 0,4781 |
| TcCLB.509733.70  | hypothetical protein, conserved                          | -0,08198 | 0,4703 |
| TcCLB.509669.120 | hypothetical protein, conserved (pseudogene)             | -0,08205 | 0,5029 |
| TcCLB.508479.86  | ATP-dependent DEAD/H RNA helicase (pseudogene), puta     | -0,08212 | 0,746  |
| TcCLB.508409.180 | hypothetical protein, conserved                          | -0,08213 | 0,3863 |
| TcCLB.503919.50  | hypothetical protein, conserved                          | -0,08222 | 0,4556 |
| TcCLB.511321.30  | hypothetical protein, conserved                          | -0,08289 | 0,6827 |
| TcCLB.510943.60  | U2 splicing auxiliary factor, putative (u2af26)          | -0,08296 | 0,3681 |
| TcCLB.506733.70  | glycosyl transferase-like protein, putative              | -0,08322 | 0,5734 |
| TcCLB.511047.50  | proteasome regulatory ATPase subunit 2, putative         | -0,08331 | 0,4066 |
| TcCLB.508727.40  | hypothetical protein, conserved                          | -0,08338 | 0,543  |
| TcCLB.508647.220 | mitochondrial RNA binding protein 1                      | -0,08341 | 0,306  |
| TcCLB.507737.10  | hypothetical protein, conserved                          | -0,08343 | 0,7288 |
| TcCLB.508461.210 | hypothetical protein, conserved                          | -0,08355 | 0,4449 |
| TcCLB.511543.40  | hypothetical protein, conserved                          | -0,08358 | 0,4619 |
| TcCLB.510303.290 | acyl-CoA dehydrogenase, putative                         | -0,08365 | 0,5397 |
| TcCLB.441061.9   | dynein heavy chain, putative (fragment)                  | -0,0839  | 0,5572 |
| TcCLB.510421.10  | surface protease GP63 (pseudogene), putative             | -0,08391 | 0,7799 |
| TcCLB.506367.180 | vesicular transport protein (CDC48 homologue), putative  | -0,08397 | 0,4302 |
| TcCLB.508323.84  | peptidyl-prolyl cis-trans isomerase, putative            | -0,084   | 0,6588 |
| TcCLB.509453.40  | RNA polymerase subunit RPB10, putative (RPB10)           | -0,08412 | 0,6868 |
| TcCLB.421959.10  | eukaryotic translation initiation factor 4E, putative    | -0,08424 | 0,4556 |
| TcCLB.511855.30  | hypothetical protein, conserved                          | -0,08439 | 0,7042 |
| TcCLB.503555.20  | hypothetical protein, conserved                          | -0,08443 | 0,5371 |
| TcCLB.503973.181 | surface protease GP63 (pseudogene), putative             | -0,08458 | 0,8512 |
| TcCLB.510237.21  | hypothetical protein, conserved (pseudogene)             | -0,08467 | 0,7549 |

|                  |                                                          |          |        |
|------------------|----------------------------------------------------------|----------|--------|
| TcCLB.510363.196 | syntaxin binding protein (pseudogene), putative          | -0,08481 | 0,8685 |
| TcCLB.510181.60  | chromatin assembly factor 1 subunit B, putative          | -0,08499 | 0,4131 |
| TcCLB.508839.80  | hypothetical protein, conserved                          | -0,08513 | 0,4306 |
| TcCLB.506201.130 | hypothetical protein, conserved                          | -0,08515 | 0,4666 |
| TcCLB.506425.140 | hypothetical protein, conserved                          | -0,08525 | 0,4761 |
| TcCLB.511771.185 | hypothetical protein                                     | -0,08531 | 0,7257 |
| TcCLB.510037.20  | surface protease GP63 (pseudogene), putative             | -0,08534 | 0,7798 |
| TcCLB.509419.100 | mucin-associated surface protein (MASP, pseudogene), pi  | -0,08537 | 0,8764 |
| TcCLB.504099.70  | retrotransposon hot spot protein (RHS, pseudogene), puta | -0,08538 | 0,7641 |
| TcCLB.506265.30  | mitochondrial DNA polymerase I protein A, putative       | -0,08539 | 0,4234 |
| TcCLB.511421.120 | E3 ubiquitin-protein ligase KCMF1, putative              | -0,08544 | 0,3902 |
| TcCLB.508549.30  | target of rapamycin (TOR) kinase 1, putative             | -0,08554 | 0,5011 |
| TcCLB.511469.24  | ADP-ribosylation factor-like 2, arl2, putative (ARL2)    | -0,08557 | 0,7208 |
| TcCLB.469785.10  | hypothetical protein, conserved                          | -0,08568 | 0,4394 |
| TcCLB.510487.44  | elongation factor 1-gamma (EF-1-gamma, pseudogene),      | -0,08569 | 0,8601 |
| TcCLB.506945.280 | hypothetical protein, conserved                          | -0,0858  | 0,2921 |
| TcCLB.510143.129 | hypothetical protein, conserved                          | -0,08585 | 0,6182 |
| TcCLB.511129.54  | hypothetical protein, conserved (pseudogene)             | -0,08586 | 0,6506 |
| TcCLB.508707.190 | hypothetical protein, conserved                          | -0,08587 | 0,3632 |
| TcCLB.509647.26  | hypothetical protein, conserved                          | -0,08587 | 0,5258 |
| TcCLB.510445.61  | hypothetical protein, conserved (fragment)               | -0,08592 | 0,6233 |
| TcCLB.509563.40  | hypothetical protein, conserved                          | -0,08594 | 0,5331 |
| TcCLB.510075.40  | hypothetical protein, conserved                          | -0,08594 | 0,5351 |
| TcCLB.503855.10  | hypothetical protein, conserved                          | -0,08597 | 0,6027 |
| TcCLB.508475.20  | hypothetical protein                                     | -0,08608 | 0,4131 |
| TcCLB.503955.89  | hypothetical protein, conserved                          | -0,08611 | 0,491  |
| TcCLB.509643.100 | hypothetical protein, conserved                          | -0,08611 | 0,5895 |
| TcCLB.503557.20  | ankyrin repeat protein, putative                         | -0,08635 | 0,6563 |
| TcCLB.510367.10  | dispersed gene family protein 1 (DGF-1), putative        | -0,08648 | 0,697  |
| TcCLB.503841.30  | rRNA dimethyltransferase, putative                       | -0,0865  | 0,6112 |
| TcCLB.504827.70  | hypothetical protein, conserved                          | -0,08662 | 0,5456 |
| TcCLB.506963.110 | NUDIX hydrolase 3, putative (Nudix3)                     | -0,08663 | 0,6297 |
| TcCLB.507883.70  | PrimPol-like protein 2, putative (ppl2)                  | -0,0867  | 0,3938 |
| TcCLB.510955.40  | axoneme central apparatus protein (PF16)                 | -0,0867  | 0,4997 |
| TcCLB.510901.80  | hypothetical protein, conserved                          | -0,08673 | 0,3999 |
| TcCLB.510421.314 | U6 snRNA-associated Sm-like protein LSm8p                | -0,08685 | 0,6302 |
| TcCLB.506513.30  | hypothetical protein, conserved                          | -0,08688 | 0,6246 |
| TcCLB.506887.60  | small nuclear RNA gene activation protein (SNAP) 50, put | -0,0869  | 0,3663 |
| TcCLB.509767.130 | hypothetical protein, conserved                          | -0,0871  | 0,6855 |
| TcCLB.504029.101 | hypothetical protein, conserved                          | -0,08726 | 0,5315 |
| TcCLB.503925.110 | hypothetical protein, conserved                          | -0,08729 | 0,5943 |
| TcCLB.510359.290 | hypothetical protein, conserved                          | -0,08729 | 0,711  |
| TcCLB.508881.110 | GTP-binding protein, putative                            | -0,08732 | 0,4688 |
| TcCLB.506357.60  | hypothetical protein, conserved                          | -0,08741 | 0,3082 |
| TcCLB.507747.220 | protein farnesyltransferase, putative                    | -0,08748 | 0,4371 |

|                  |                                                          |          |        |
|------------------|----------------------------------------------------------|----------|--------|
| TcCLB.511727.300 | GDP-L-fucose synthetase, putative                        | -0,08761 | 0,3983 |
| TcCLB.503827.50  | trans-sialidase (pseudogene), putative                   | -0,08768 | 0,819  |
| TcCLB.509103.39  | dynein heavy chain, putative                             | -0,08775 | 0,4588 |
| TcCLB.511727.120 | ethanolamine-phosphate cytidyltransferase (ECT)          | -0,08802 | 0,2954 |
| TcCLB.507611.398 | RNA editing complex protein MP63, putative (fragment)    | -0,08803 | 0,3702 |
| TcCLB.509643.60  | hypothetical protein, conserved                          | -0,08818 | 0,5238 |
| TcCLB.507167.190 | trans-sialidase (pseudogene), putative                   | -0,08824 | 0,6752 |
| TcCLB.509695.110 | hypothetical protein, conserved                          | -0,08842 | 0,4548 |
| TcCLB.511367.80  | hypothetical protein, conserved                          | -0,08846 | 0,5232 |
| TcCLB.509937.150 | serine hydroxymethyltransferase, putative                | -0,08852 | 0,5955 |
| TcCLB.509633.40  | hypothetical protein, conserved                          | -0,08855 | 0,5634 |
| TcCLB.506933.70  | hypothetical protein, conserved                          | -0,0887  | 0,4172 |
| TcCLB.508803.5   | retrotransposon hot spot protein (RHS, pseudogene), puta | -0,08871 | 0,85   |
| TcCLB.506743.140 | hypothetical protein, conserved                          | -0,08879 | 0,4693 |
| TcCLB.510889.10  | hypothetical protein, conserved                          | -0,08889 | 0,5908 |
| TcCLB.509683.24  | DNA-directed RNA polymerase I subunit, putative          | -0,08901 | 0,5636 |
| TcCLB.508409.329 | hypothetical protein, conserved                          | -0,0892  | 0,5151 |
| TcCLB.511131.98  | hypothetical protein, conserved                          | -0,08928 | 0,5807 |
| TcCLB.511857.20  | hypothetical protein, conserved                          | -0,08949 | 0,4576 |
| TcCLB.510971.69  | hypothetical protein, conserved (fragment)               | -0,08958 | 0,3998 |
| TcCLB.507663.50  | ATP-dependent RNA helicase, putative                     | -0,0897  | 0,2856 |
| TcCLB.510439.20  | hypothetical protein, conserved                          | -0,08975 | 0,6619 |
| TcCLB.507641.160 | hypothetical protein, conserved                          | -0,08984 | 0,256  |
| TcCLB.510771.9   | hypothetical protein, conserved (fragment)               | -0,08988 | 0,3519 |
| TcCLB.505051.30  | tryptophanyl-tRNA synthetase, putative (fragment)        | -0,08992 | 0,8429 |
| TcCLB.508251.21  | hypothetical protein, conserved (pseudogene)             | -0,09001 | 0,7285 |
| TcCLB.509365.50  | hypothetical protein, conserved                          | -0,09002 | 0,8004 |
| TcCLB.507991.126 | hypothetical protein, conserved                          | -0,0901  | 0,6588 |
| TcCLB.506257.50  | surface protease GP63, putative                          | -0,09014 | 0,6993 |
| TcCLB.506919.60  | hypothetical protein                                     | -0,09014 | 0,7937 |
| TcCLB.506509.50  | hypothetical protein, conserved                          | -0,09017 | 0,3879 |
| TcCLB.506237.10  | mismatch repair protein MSH5, putative                   | -0,09018 | 0,478  |
| TcCLB.511871.34  | protein transport protein Sec61 gamma subunit, putative  | -0,09025 | 0,5397 |
| TcCLB.506755.30  | hypothetical protein, conserved                          | -0,09026 | 0,4357 |
| TcCLB.510259.18  | GlcNAc-PI synthesis protein (GPI3)                       | -0,09055 | 0,5575 |
| TcCLB.511807.250 | hypothetical protein, conserved                          | -0,09081 | 0,4369 |
| TcCLB.510491.30  | hypothetical protein, conserved (pseudogene)             | -0,09084 | 0,5306 |
| TcCLB.511003.210 | hypothetical protein, conserved                          | -0,09085 | 0,5259 |
| TcCLB.510887.64  | hypothetical protein, conserved                          | -0,09094 | 0,6112 |
| TcCLB.438147.9   | hypothetical protein, conserved (fragment)               | -0,09098 | 0,5358 |
| TcCLB.506715.10  | protein kinase, putative                                 | -0,091   | 0,3699 |
| TcCLB.503891.90  | hypothetical protein                                     | -0,09101 | 0,5593 |
| TcCLB.508153.950 | 6-phosphofructo-2-kinase 1                               | -0,09129 | 0,271  |
| TcCLB.511465.20  | hypothetical protein, conserved                          | -0,0913  | 0,37   |
| TcCLB.503969.10  | tubulin delta chain (TUBD1)                              | -0,09135 | 0,5402 |



|                  |                                                          |          |        |
|------------------|----------------------------------------------------------|----------|--------|
| TcCLB.508461.174 | hypothetical protein, conserved                          | -0,09154 | 0,6774 |
| TcCLB.506303.100 | hypothetical protein, conserved                          | -0,09155 | 0,5396 |
| TcCLB.506435.170 | hypothetical protein, conserved                          | -0,09162 | 0,6242 |
| TcCLB.503803.10  | rRNA biogenesis protein, putative                        | -0,09164 | 0,4291 |
| TcCLB.508355.100 | diacylglycerol acyltransferase, putative                 | -0,09166 | 0,3151 |
| TcCLB.506351.40  | ribonuclease H1, putative                                | -0,09168 | 0,5512 |
| TcCLB.510743.50  | phospholipase A2-like protein, putative                  | -0,09171 | 0,4948 |
| TcCLB.508479.465 | ATP-dependent DEAD/H RNA helicase (pseudogene), puta     | -0,09173 | 0,7489 |
| TcCLB.407477.44  | hypothetical protein, conserved                          | -0,09174 | 0,6714 |
| TcCLB.509229.10  | hypothetical protein, conserved                          | -0,0918  | 0,433  |
| TcCLB.507143.30  | hypothetical protein                                     | -0,09182 | 0,2567 |
| TcCLB.509753.140 | mucin-associated surface protein (MASP), putative        | -0,09188 | 0,7697 |
| TcCLB.504183.10  | retrotransposon hot spot protein (RHS, pseudogene), puta | -0,09191 | 0,6387 |
| TcCLB.509203.70  | DNA topoisomerase II, putative                           | -0,09197 | 0,3464 |
| TcCLB.511311.60  | hypothetical protein, conserved                          | -0,09198 | 0,5688 |
| TcCLB.506195.150 | hypothetical protein, conserved                          | -0,09203 | 0,3324 |
| TcCLB.427247.4   | hypothetical protein, conserved (fragment)               | -0,09216 | 0,5072 |
| TcCLB.506635.30  | hypothetical protein, conserved                          | -0,09223 | 0,453  |
| TcCLB.507997.40  | hypothetical protein, conserved                          | -0,09226 | 0,4685 |
| TcCLB.506437.30  | amastin, putative                                        | -0,09233 | 0,4535 |
| TcCLB.507541.10  | hypothetical protein, conserved                          | -0,09235 | 0,5999 |
| TcCLB.510901.50  | C-terminal motor kinesin, putative                       | -0,09236 | 0,3568 |
| TcCLB.508909.140 | hypothetical protein, conserved                          | -0,09238 | 0,4899 |
| TcCLB.506657.30  | hypothetical protein, conserved                          | -0,09239 | 0,3202 |
| TcCLB.509429.150 | hypothetical protein, conserved                          | -0,09243 | 0,4657 |
| TcCLB.503477.30  | hypothetical protein, conserved                          | -0,09274 | 0,5787 |
| TcCLB.509605.10  | malonyl-CoA decarboxylase, mitochondrial precursor, puta | -0,09284 | 0,5488 |
| TcCLB.511911.159 | histone deacetylase 1, putative                          | -0,09287 | 0,587  |
| TcCLB.508641.300 | hypothetical protein                                     | -0,09288 | 0,4145 |
| TcCLB.511733.90  | hypothetical protein, conserved                          | -0,09301 | 0,5326 |
| TcCLB.416891.9   | protein kinase, putative                                 | -0,09303 | 0,5476 |
| TcCLB.508465.120 | syntaxin, putative                                       | -0,09307 | 0,4378 |
| TcCLB.511165.20  | hypothetical protein                                     | -0,09313 | 0,3991 |
| TcCLB.506945.30  | CAS/CSE/importin domain protein, putative                | -0,09318 | 0,3262 |
| TcCLB.506411.39  | CDP-DAG synthase, putative (fragment) (CDS)              | -0,09339 | 0,7167 |
| TcCLB.511609.10  | retrotransposon hot spot protein (RHS, pseudogene), puta | -0,0934  | 0,7348 |
| TcCLB.506945.100 | hypothetical protein, conserved                          | -0,09352 | 0,346  |
| TcCLB.504071.80  | nuclear cap binding protein, putative                    | -0,09358 | 0,604  |
| TcCLB.508917.40  | hypothetical protein, conserved                          | -0,09368 | 0,406  |
| TcCLB.441967.9   | hypothetical protein, conserved                          | -0,09368 | 0,504  |
| TcCLB.509695.40  | hypothetical protein, conserved                          | -0,0938  | 0,41   |
| TcCLB.510329.360 | hypothetical protein, conserved                          | -0,09399 | 0,5523 |
| TcCLB.509151.40  | inorganic polyphosphate/ATP-NAD kinase, putative         | -0,09402 | 0,2368 |
| TcCLB.504157.50  | DnaJ chaperone protein, putative                         | -0,09404 | 0,4491 |
| TcCLB.511627.120 | aldo/keto reductase, putative                            | -0,09416 | 0,4712 |

|                  |                                                            |          |        |
|------------------|------------------------------------------------------------|----------|--------|
| TcCLB.509163.110 | retrotransposon hot spot (RHS) protein, putative           | -0,09435 | 0,6397 |
| TcCLB.504033.100 | hypothetical protein, conserved                            | -0,09437 | 0,3775 |
| TcCLB.506247.450 | hypothetical protein, conserved                            | -0,09437 | 0,3943 |
| TcCLB.508183.20  | hypothetical protein, conserved                            | -0,09447 | 0,4513 |
| TcCLB.506337.140 | hypothetical protein, conserved                            | -0,09452 | 0,4248 |
| TcCLB.403875.19  | hypothetical protein, conserved (fragment)                 | -0,09459 | 0,7217 |
| TcCLB.509571.50  | hypothetical protein, conserved                            | -0,09461 | 0,39   |
| TcCLB.508461.149 | hypothetical protein, conserved                            | -0,0947  | 0,337  |
| TcCLB.511737.30  | hypothetical protein, conserved                            | -0,0947  | 0,4194 |
| TcCLB.507011.120 | acyl transferase-like protein, putative                    | -0,09515 | 0,4199 |
| TcCLB.507641.60  | aldehyde dehydrogenase, putative                           | -0,09518 | 0,3274 |
| TcCLB.506355.60  | small G-protein, putative                                  | -0,0952  | 0,3039 |
| TcCLB.511287.4   | hypothetical protein                                       | -0,09529 | 0,3848 |
| TcCLB.508355.130 | hypothetical protein, conserved                            | -0,09533 | 0,3582 |
| TcCLB.508347.30  | hypothetical protein, conserved                            | -0,09551 | 0,3456 |
| TcCLB.506807.10  | tubulin delta chain (TUBD1)                                | -0,09557 | 0,5274 |
| TcCLB.508479.190 | peroxisome assembly protein, putative                      | -0,09558 | 0,3871 |
| TcCLB.503579.100 | nucleotide-binding protein, putative                       | -0,09566 | 0,4644 |
| TcCLB.507093.260 | multidrug resistance protein, mitochondrial, putative (AB) | -0,09574 | 0,1971 |
| TcCLB.508815.120 | hypothetical protein, conserved                            | -0,09574 | 0,4492 |
| TcCLB.509049.10  | hypothetical protein, conserved                            | -0,09579 | 0,5467 |
| TcCLB.507467.94  | hypothetical protein, conserved                            | -0,0958  | 0,6216 |
| TcCLB.509791.10  | hypothetical protein, conserved                            | -0,09581 | 0,6634 |
| TcCLB.508047.30  | trans-sialidase (pseudogene), putative                     | -0,09591 | 0,7485 |
| TcCLB.506273.10  | trans-sialidase (pseudogene), putative                     | -0,09595 | 0,572  |
| TcCLB.510339.70  | hypothetical protein, conserved                            | -0,09604 | 0,4182 |
| TcCLB.509385.11  | retrotransposon hot spot protein (RHS, pseudogene), puta   | -0,09617 | 0,6998 |
| TcCLB.511855.80  | hypothetical protein, conserved                            | -0,09633 | 0,3912 |
| TcCLB.508827.60  | hypothetical protein, conserved                            | -0,09636 | 0,3889 |
| TcCLB.511521.30  | superoxide dismutase, putative                             | -0,09646 | 0,3931 |
| TcCLB.474339.9   | hypothetical protein, conserved                            | -0,09648 | 0,4378 |
| TcCLB.507023.80  | hypothetical protein, conserved                            | -0,09657 | 0,5534 |
| TcCLB.503939.30  | ttaggg binding factor, putative                            | -0,09664 | 0,4115 |
| TcCLB.507819.40  | retrotransposon hot spot protein (RHS, pseudogene), puta   | -0,09697 | 0,5944 |
| TcCLB.506789.150 | hypothetical protein                                       | -0,09699 | 0,4341 |
| TcCLB.483623.10  | hypothetical protein, conserved                            | -0,09704 | 0,5782 |
| TcCLB.506263.30  | D-isomer specific 2-hydroxyacid dehydrogenase-protein, p   | -0,09707 | 0,6563 |
| TcCLB.509393.50  | hypothetical protein, conserved                            | -0,0971  | 0,3562 |
| TcCLB.511751.130 | small GTP-binding protein Rab28, putative                  | -0,09754 | 0,4672 |
| TcCLB.503879.100 | hypothetical protein, conserved                            | -0,0976  | 0,1962 |
| TcCLB.509937.170 | hypothetical protein                                       | -0,09767 | 0,4817 |
| TcCLB.507711.230 | hypothetical protein, conserved                            | -0,09769 | 0,3527 |
| TcCLB.503913.49  | hypothetical protein, conserved (fragment)                 | -0,09775 | 0,7653 |
| TcCLB.506793.60  | hypothetical protein, conserved                            | -0,09779 | 0,4488 |
| TcCLB.511425.10  | serine/threonine protein phosphatase 2A regulatory subu    | -0,09789 | 0,5758 |

|                  |                                                          |          |        |
|------------------|----------------------------------------------------------|----------|--------|
| TcCLB.471901.20  | SNARE protein, putative                                  | -0,0981  | 0,4331 |
| TcCLB.507209.20  | hypothetical protein, conserved                          | -0,09813 | 0,4905 |
| TcCLB.506287.140 | prefoldin, putative                                      | -0,09829 | 0,4555 |
| TcCLB.506181.150 | hypothetical protein (fragment)                          | -0,0983  | 0,2857 |
| TcCLB.506989.210 | U-box domain protein, putative                           | -0,09835 | 0,2526 |
| TcCLB.511231.60  | hypothetical protein, conserved                          | -0,09859 | 0,4692 |
| TcCLB.509065.124 | U6 snRNA-associated Sm-like protein LSm5p                | -0,09859 | 0,5975 |
| TcCLB.503939.130 | hypothetical protein, conserved                          | -0,09863 | 0,3389 |
| TcCLB.509053.150 | hypothetical protein, conserved                          | -0,09863 | 0,5561 |
| TcCLB.508613.10  | hypothetical protein, conserved                          | -0,09867 | 0,4637 |
| TcCLB.509985.78  | hypothetical protein, conserved                          | -0,09875 | 0,5287 |
| TcCLB.506221.30  | protein phosphatase 2C, putative                         | -0,09878 | 0,3677 |
| TcCLB.503581.10  | hypothetical protein, conserved                          | -0,09883 | 0,3132 |
| TcCLB.506355.170 | hypothetical protein, conserved                          | -0,09907 | 0,5281 |
| TcCLB.504019.9   | hypothetical protein, conserved                          | -0,0991  | 0,5614 |
| TcCLB.510877.50  | AP-3 complex subunit mu, putative (AP3M)                 | -0,09911 | 0,3343 |
| TcCLB.508707.330 | chaperone DNAJ protein, putative                         | -0,09911 | 0,4288 |
| TcCLB.506567.10  | hypothetical protein, conserved                          | -0,09911 | 0,4581 |
| TcCLB.442629.9   | hypothetical protein, conserved                          | -0,09911 | 0,5138 |
| TcCLB.508917.4   | hypothetical protein, conserved                          | -0,09912 | 0,4399 |
| TcCLB.503881.4   | hypothetical protein, conserved                          | -0,09913 | 0,7461 |
| TcCLB.503635.10  | protein kinase, putative                                 | -0,09917 | 0,4061 |
| TcCLB.509045.10  | hypothetical protein, conserved                          | -0,09917 | 0,5336 |
| TcCLB.503587.64  | retrotransposon hot spot protein (RHS, pseudogene), puta | -0,09921 | 0,7554 |
| TcCLB.506915.30  | hypothetical protein                                     | -0,0993  | 0,3082 |
| TcCLB.507083.60  | COP9 signalosome complex subunit 5, putative             | -0,09942 | 0,5819 |
| TcCLB.508129.9   | adenosine monophosphate deaminase, putative (fragmer     | -0,09947 | 0,4179 |
| TcCLB.506615.120 | trans-sialidase (pseudogene), putative                   | -0,09952 | 0,5759 |
| TcCLB.506577.130 | protein phosphatase 2A regulatory subunit, putative      | -0,09956 | 0,432  |
| TcCLB.503555.40  | ATP-dependent RNA helicase, putative                     | -0,09967 | 0,3027 |
| TcCLB.506265.50  | hypothetical protein, conserved                          | -0,09967 | 0,4449 |
| TcCLB.508323.120 | hypothetical protein, conserved                          | -0,0997  | 0,516  |
| TcCLB.506855.150 | hypothetical protein, conserved                          | -0,09995 | 0,3633 |
| TcCLB.511621.150 | hypothetical protein, conserved                          | -0,1002  | 0,3761 |
| TcCLB.506795.20  | hypothetical protein, conserved                          | -0,1002  | 0,5069 |
| TcCLB.511423.149 | conserved protein, unknown function                      | -0,1002  | 0,5261 |
| TcCLB.503697.90  | Translation factor GUF1, mitochondrial, putative (GUF1)  | -0,1003  | 0,2867 |
| TcCLB.507989.20  | sigma-adaptin 3, putative                                | -0,1003  | 0,5093 |
| TcCLB.506605.214 | hypothetical protein, conserved                          | -0,1003  | 0,5943 |
| TcCLB.510613.30  | hypothetical protein                                     | -0,1004  | 0,3937 |
| TcCLB.506413.50  | hypothetical protein, conserved                          | -0,1005  | 0,4495 |
| TcCLB.503425.29  | DNA replication licensing factor MCM8, putative          | -0,1005  | 0,4862 |
| TcCLB.511245.20  | hypothetical protein, conserved                          | -0,1005  | 0,5273 |
| TcCLB.509941.140 | hypothetical protein, conserved                          | -0,1007  | 0,533  |
| TcCLB.506529.340 | Protein kinase domain, putative                          | -0,1008  | 0,5359 |

|                  |                                                             |         |        |
|------------------|-------------------------------------------------------------|---------|--------|
| TcCLB.508325.110 | hypothetical protein, conserved                             | -0,1008 | 0,6425 |
| TcCLB.504085.60  | CMP-sialic acid transporter, putative                       | -0,1009 | 0,4981 |
| TcCLB.511919.30  | hypothetical protein, conserved (pseudogene)                | -0,1009 | 0,6857 |
| TcCLB.509269.4   | Tb-291 membrane associated protein, putative                | -0,101  | 0,4099 |
| TcCLB.510187.180 | hypothetical protein, conserved                             | -0,1013 | 0,1963 |
| TcCLB.511301.30  | hypothetical protein, conserved                             | -0,1013 | 0,5462 |
| TcCLB.510349.90  | Lys-63-specific deubiquitinase BRCC36, putative             | -0,1014 | 0,4192 |
| TcCLB.509603.10  | vacuolar protein sorting 18, putative                       | -0,1016 | 0,5109 |
| TcCLB.510535.80  | hypothetical protein, conserved                             | -0,1016 | 0,5903 |
| TcCLB.506001.120 | hypothetical protein, conserved (pseudogene)                | -0,1016 | 0,7445 |
| TcCLB.508577.160 | proteasome beta 6 subunit, putative                         | -0,1017 | 0,2788 |
| TcCLB.506295.110 | hypothetical protein, conserved                             | -0,1017 | 0,5234 |
| TcCLB.506567.74  | hypothetical protein, conserved                             | -0,1017 | 0,5649 |
| TcCLB.506727.150 | hypothetical protein, conserved                             | -0,1018 | 0,512  |
| TcCLB.506589.80  | surface protease GP63 (pseudogene), putative                | -0,1018 | 0,7939 |
| TcCLB.506679.160 | intraflagellar transport protein 122, putative (IFT122)     | -0,1019 | 0,2616 |
| TcCLB.509979.379 | hypothetical protein, conserved                             | -0,1019 | 0,434  |
| TcCLB.508153.750 | hypothetical protein, conserved                             | -0,102  | 0,4181 |
| TcCLB.507017.4   | hypothetical protein, conserved                             | -0,102  | 0,663  |
| TcCLB.508277.50  | presenilin-like aspartic peptidase, putative                | -0,1021 | 0,3223 |
| TcCLB.508777.160 | hypothetical protein, conserved                             | -0,1022 | 0,339  |
| TcCLB.511367.74  | hypothetical protein, conserved                             | -0,1023 | 0,5048 |
| TcCLB.507801.210 | retrotransposon hot spot protein (RHS, pseudogene), puta    | -0,1023 | 0,5725 |
| TcCLB.509795.10  | hypothetical protein, conserved                             | -0,1024 | 0,3621 |
| TcCLB.506885.120 | protein kinase, putative                                    | -0,1026 | 0,4577 |
| TcCLB.506135.110 | mitochondrial RNA binding complex 1 subunit, putative       | -0,1027 | 0,4293 |
| TcCLB.511519.18  | hypothetical protein, conserved                             | -0,1027 | 0,564  |
| TcCLB.507969.54  | hypothetical protein, conserved                             | -0,1028 | 0,4116 |
| TcCLB.510253.29  | hypothetical protein, conserved (fragment)                  | -0,1028 | 0,6462 |
| TcCLB.510307.191 | protein kinase (pseudogene), putative                       | -0,1029 | 0,3134 |
| TcCLB.506661.80  | hypothetical protein, conserved                             | -0,103  | 0,4093 |
| TcCLB.506953.40  | hypothetical protein, conserved                             | -0,1032 | 0,3936 |
| TcCLB.509059.60  | hypothetical protein, conserved                             | -0,1033 | 0,6722 |
| TcCLB.507647.20  | hypothetical protein, conserved (pseudogene)                | -0,1034 | 0,2534 |
| TcCLB.511283.170 | hypothetical protein, conserved                             | -0,1036 | 0,1687 |
| TcCLB.508213.20  | hypothetical protein, conserved                             | -0,1036 | 0,5607 |
| TcCLB.508899.120 | hypothetical protein, conserved                             | -0,1037 | 0,6471 |
| TcCLB.507739.90  | hypothetical protein, conserved                             | -0,104  | 0,4592 |
| TcCLB.510435.5   | hypothetical protein, conserved (pseudogene)                | -0,1042 | 0,5451 |
| TcCLB.508493.70  | hypothetical protein                                        | -0,1042 | 0,7385 |
| TcCLB.505165.10  | RNA-binding protein, putative                               | -0,1042 | 0,7937 |
| TcCLB.511693.90  | electron-transfer-flavoprotein, alpha polypeptide, putative | -0,1043 | 0,2756 |
| TcCLB.506871.120 | hypothetical protein, conserved                             | -0,1043 | 0,3681 |
| TcCLB.509047.60  | hypothetical protein, conserved                             | -0,1044 | 0,374  |
| TcCLB.511527.60  | hypothetical protein, conserved                             | -0,1044 | 0,4021 |

|                  |                                                           |         |        |
|------------------|-----------------------------------------------------------|---------|--------|
| TcCLB.510101.59  | palmitoyl acyltransferase 7, putative                     | -0,1045 | 0,315  |
| TcCLB.506529.170 | hypothetical protein, conserved                           | -0,1045 | 0,4545 |
| TcCLB.509259.123 | hypothetical protein (pseudogene)                         | -0,1046 | 0,5274 |
| TcCLB.504827.80  | hypothetical protein, conserved                           | -0,1046 | 0,5702 |
| TcCLB.509469.10  | dispersed gene family protein 1 (DGF-1, pseudogene), put  | -0,1046 | 0,701  |
| TcCLB.509791.40  | hypothetical protein, conserved                           | -0,1047 | 0,2534 |
| TcCLB.511419.20  | hypothetical protein, conserved                           | -0,1047 | 0,3302 |
| TcCLB.504173.50  | dihydrouridine synthase (Dus), putative                   | -0,1047 | 0,495  |
| TcCLB.503899.60  | hypothetical protein, conserved                           | -0,105  | 0,4485 |
| TcCLB.511345.10  | retrotransposon hot spot (RHS) protein, putative          | -0,1051 | 0,5308 |
| TcCLB.506179.30  | hypothetical protein, conserved                           | -0,1052 | 0,4344 |
| TcCLB.509039.40  | hypothetical protein                                      | -0,1052 | 0,4595 |
| TcCLB.511253.20  | kinesin-like protein, putative                            | -0,1052 | 0,5575 |
| TcCLB.509509.60  | small GTP-binding protein, putative                       | -0,1053 | 0,3402 |
| TcCLB.506221.50  | coatamer subunit epsilon (COPE)                           | -0,1053 | 0,3946 |
| TcCLB.506625.200 | ribosomal RNA processing protein 40, putative (RRP40)     | -0,1053 | 0,4804 |
| TcCLB.506529.660 | hypothetical protein, conserved                           | -0,1054 | 0,5146 |
| TcCLB.507631.15  | hypothetical protein, conserved (pseudogene)              | -0,1054 | 0,6202 |
| TcCLB.507993.80  | glycogen synthase kinase 3, putative                      | -0,1056 | 0,5269 |
| TcCLB.511753.80  | GTPase activating protein, putative                       | -0,1057 | 0,4017 |
| TcCLB.507895.150 | hypothetical protein, conserved                           | -0,1058 | 0,4857 |
| TcCLB.511367.138 | chaperone DNAJ protein, putative                          | -0,1059 | 0,358  |
| TcCLB.510761.4   | hypothetical protein, conserved                           | -0,1059 | 0,3738 |
| TcCLB.506673.10  | hypothetical protein, conserved                           | -0,106  | 0,4683 |
| TcCLB.505073.20  | hypothetical protein                                      | -0,1061 | 0,2741 |
| TcCLB.505943.50  | hypothetical protein, conserved                           | -0,1061 | 0,374  |
| TcCLB.508829.9   | dynein heavy chain, putative (fragment)                   | -0,1062 | 0,4029 |
| TcCLB.508765.40  | hypothetical protein                                      | -0,1062 | 0,418  |
| TcCLB.510755.138 | serine/threonine protein phosphatase, putative            | -0,1064 | 0,4092 |
| TcCLB.509599.110 | hypothetical protein, conserved                           | -0,1065 | 0,4215 |
| TcCLB.503923.20  | hypothetical protein, conserved                           | -0,1065 | 0,516  |
| TcCLB.506865.30  | hypothetical protein, conserved                           | -0,1066 | 0,3566 |
| TcCLB.504085.20  | exosome-associated protein 2, putative (EAP2)             | -0,1066 | 0,3918 |
| TcCLB.506733.100 | hypothetical protein, conserved                           | -0,1067 | 0,297  |
| TcCLB.503593.40  | hypothetical protein                                      | -0,1067 | 0,3382 |
| TcCLB.504639.40  | trans-sialidase, putative                                 | -0,1067 | 0,6781 |
| TcCLB.511631.9   | hypothetical protein, conserved (fragment)                | -0,107  | 0,5756 |
| TcCLB.510187.400 | serine/threonine protein phosphatase, putative            | -0,1073 | 0,2809 |
| TcCLB.509719.20  | ATP-dependent DEAD/H RNA helicase, putative               | -0,1075 | 0,3022 |
| TcCLB.511585.30  | hypothetical protein, conserved                           | -0,1077 | 0,3058 |
| TcCLB.508177.20  | carbohydrate kinase, thermoresistant glucokinase, putativ | -0,1078 | 0,6655 |
| TcCLB.506227.220 | hypothetical protein, conserved                           | -0,1079 | 0,3001 |
| TcCLB.504827.40  | AP-3 complex subunit beta, putative (AP3B)                | -0,1079 | 0,3179 |
| TcCLB.504011.40  | XPA-interacting protein, putative                         | -0,1079 | 0,3382 |
| TcCLB.506517.110 | hypothetical protein, conserved                           | -0,108  | 0,5866 |

|                  |                                                          |         |        |
|------------------|----------------------------------------------------------|---------|--------|
| TcCLB.506265.200 | hypothetical protein, conserved                          | -0,1081 | 0,519  |
| TcCLB.506267.101 | surface protease GP63 (pseudogene), putative             | -0,1081 | 0,7224 |
| TcCLB.508209.140 | protein disulfide isomerase, putative                    | -0,1082 | 0,1893 |
| TcCLB.510229.10  | hypothetical protein, conserved                          | -0,1082 | 0,2758 |
| TcCLB.511583.20  | hypothetical protein, conserved                          | -0,1082 | 0,4045 |
| TcCLB.506841.4   | hypothetical protein, conserved                          | -0,1082 | 0,5961 |
| TcCLB.506151.30  | small GTP-binding protein Rab11, putative (TcRab11)      | -0,1084 | 0,3431 |
| TcCLB.504533.20  | retrotransposon hot spot protein (RHS, pseudogene), puta | -0,1084 | 0,4566 |
| TcCLB.508263.10  | hypothetical protein                                     | -0,1085 | 0,3516 |
| TcCLB.506895.60  | hypothetical protein, conserved (pseudogene)             | -0,1086 | 0,4134 |
| TcCLB.503805.20  | hypothetical protein, conserved                          | -0,1086 | 0,4267 |
| TcCLB.507711.120 | hypothetical protein, conserved                          | -0,1087 | 0,4868 |
| TcCLB.511277.520 | protein kinase (pseudogene), putative                    | -0,1087 | 0,513  |
| TcCLB.508909.40  | hypothetical protein, conserved                          | -0,1088 | 0,3465 |
| TcCLB.511421.24  | kelch domain-containing protein                          | -0,1088 | 0,3884 |
| TcCLB.419703.20  | ubiquitin carboxyl-terminal hydrolase, putative          | -0,1088 | 0,4    |
| TcCLB.509429.80  | hypothetical protein, conserved                          | -0,1089 | 0,3988 |
| TcCLB.506225.30  | hypothetical protein, conserved (pseudogene)             | -0,1089 | 0,6809 |
| TcCLB.508897.90  | hypothetical protein, conserved                          | -0,109  | 0,3407 |
| TcCLB.510719.90  | hypothetical protein, conserved                          | -0,109  | 0,4795 |
| TcCLB.508573.90  | retrotransposon hot spot protein (RHS, pseudogene), puta | -0,109  | 0,5528 |
| TcCLB.510143.10  | hypothetical protein, conserved                          | -0,1091 | 0,4689 |
| TcCLB.509065.100 | hypothetical protein, conserved                          | -0,1091 | 0,4849 |
| TcCLB.508899.80  | hypothetical protein, conserved                          | -0,1092 | 0,2837 |
| TcCLB.510257.24  | hypothetical protein, conserved                          | -0,1092 | 0,4761 |
| TcCLB.506679.170 | hypothetical protein, conserved                          | -0,1093 | 0,1953 |
| TcCLB.506637.70  | hypothetical protein, conserved                          | -0,1094 | 0,3034 |
| TcCLB.511593.40  | trans-sialidase (pseudogene), putative                   | -0,1094 | 0,3729 |
| TcCLB.503897.40  | hypothetical protein, conserved                          | -0,1095 | 0,2559 |
| TcCLB.506227.230 | N-acetyltransferase complex ARD1 subunit, putative       | -0,1095 | 0,4151 |
| TcCLB.509623.10  | hypothetical protein, conserved                          | -0,1096 | 0,3622 |
| TcCLB.511527.82  | hypothetical protein, conserved                          | -0,1096 | 0,5818 |
| TcCLB.509791.170 | small GTPase, putative                                   | -0,1097 | 0,3613 |
| TcCLB.511651.10  | ATP-dependent DEAD/H RNA helicase, putative              | -0,1097 | 0,4681 |
| TcCLB.503455.20  | hypothetical protein, conserved                          | -0,1099 | 0,3993 |
| TcCLB.510255.29  | hypothetical protein, conserved (fragment)               | -0,1099 | 0,4865 |
| TcCLB.506579.30  | myo-inositol-1 phosphatase, putative                     | -0,11   | 0,2284 |
| TcCLB.509767.40  | hypothetical protein, conserved                          | -0,11   | 0,3483 |
| TcCLB.510687.20  | hypothetical protein, conserved                          | -0,11   | 0,4666 |
| TcCLB.511389.20  | hypothetical protein, conserved                          | -0,1101 | 0,3237 |
| TcCLB.413605.10  | kinesin, putative                                        | -0,1102 | 0,3117 |
| TcCLB.506513.70  | hypothetical protein                                     | -0,1102 | 0,3683 |
| TcCLB.510009.19  | hypothetical protein, conserved (fragment)               | -0,1103 | 0,605  |
| TcCLB.511725.100 | phosphatidylinositol-4-phosphate 5-kinase, putative      | -0,1104 | 0,267  |
| TcCLB.511753.150 | hypothetical protein, conserved                          | -0,1104 | 0,4614 |

|                  |                                                        |         |        |
|------------------|--------------------------------------------------------|---------|--------|
| TcCLB.504109.170 | hypothetical protein, conserved                        | -0,1105 | 0,2375 |
| TcCLB.511815.90  | hypothetical protein                                   | -0,1105 | 0,3903 |
| TcCLB.508143.30  | hypothetical protein, conserved (pseudogene)           | -0,1105 | 0,4331 |
| TcCLB.511491.150 | hypothetical protein, conserved                        | -0,1106 | 0,3692 |
| TcCLB.506127.130 | hypothetical protein, conserved                        | -0,1106 | 0,4187 |
| TcCLB.508905.20  | hypothetical protein, conserved (pseudogene)           | -0,1106 | 0,6013 |
| TcCLB.506901.85  | mucin-associated surface protein (MASP, pseudogene), p | -0,1106 | 0,8221 |
| TcCLB.506947.100 | hypothetical protein, conserved                        | -0,1107 | 0,393  |
| TcCLB.511299.60  | hypothetical protein, conserved                        | -0,1107 | 0,4673 |
| TcCLB.507053.140 | hypothetical protein, conserved                        | -0,1109 | 0,4422 |
| TcCLB.511245.210 | hypothetical protein, conserved                        | -0,111  | 0,3302 |
| TcCLB.511173.420 | mucin TcMUCII, putative                                | -0,111  | 0,746  |
| TcCLB.510759.80  | hypothetical protein, conserved                        | -0,1111 | 0,2149 |
| TcCLB.506671.50  | trans-sialidase (pseudogene), putative                 | -0,1111 | 0,657  |
| TcCLB.511501.10  | hypothetical protein, conserved                        | -0,1112 | 0,1607 |
| TcCLB.509671.130 | trypanin-like protein (pseudogene), putative           | -0,1113 | 0,352  |
| TcCLB.506975.66  | hypothetical protein, conserved                        | -0,1116 | 0,2787 |
| TcCLB.509017.40  | hypothetical protein, conserved                        | -0,1116 | 0,3276 |
| TcCLB.508825.20  | hypothetical protein                                   | -0,1116 | 0,4704 |
| TcCLB.506041.60  | hypothetical protein, conserved                        | -0,1117 | 0,2539 |
| TcCLB.510265.90  | hypothetical protein, conserved                        | -0,1117 | 0,3696 |
| TcCLB.511379.9   | hypothetical protein, conserved (fragment)             | -0,1117 | 0,3981 |
| TcCLB.506797.80  | hypothetical protein, conserved                        | -0,1117 | 0,4263 |
| TcCLB.503939.10  | acetyltransferase, putative                            | -0,1118 | 0,3822 |
| TcCLB.507997.70  | hypothetical protein, conserved                        | -0,1119 | 0,342  |
| TcCLB.504203.50  | hypothetical protein, conserved                        | -0,112  | 0,4248 |
| TcCLB.508585.10  | hypothetical protein, conserved                        | -0,1123 | 0,3951 |
| TcCLB.505183.110 | hypothetical protein                                   | -0,1123 | 0,6227 |
| TcCLB.506529.425 | hypothetical protein                                   | -0,1123 | 0,7433 |
| TcCLB.507649.20  | hypothetical protein, conserved                        | -0,1124 | 0,1972 |
| TcCLB.506479.60  | kinesin heavy chain, putative                          | -0,1124 | 0,3355 |
| TcCLB.432867.10  | hypothetical protein, conserved (fragment)             | -0,1124 | 0,4063 |
| TcCLB.510319.9   | hypothetical protein, conserved                        | -0,1124 | 0,4134 |
| TcCLB.506247.440 | hypothetical protein, conserved                        | -0,1125 | 0,5437 |
| TcCLB.508707.320 | hypothetical protein, conserved                        | -0,1126 | 0,3041 |
| TcCLB.511743.30  | hypothetical protein, conserved                        | -0,1126 | 0,3198 |
| TcCLB.508741.280 | ubiquitin-conjugating enzyme E2, putative              | -0,1126 | 0,4095 |
| TcCLB.506587.90  | surface protease GP63, putative                        | -0,1126 | 0,4443 |
| TcCLB.511367.159 | hypothetical protein, conserved (pseudogene)           | -0,1126 | 0,4994 |
| TcCLB.509985.69  | hypothetical protein, conserved                        | -0,1126 | 0,5734 |
| TcCLB.506959.140 | hypothetical protein, conserved                        | -0,1127 | 0,4678 |
| TcCLB.506739.90  | ATP-dependent RNA helicase, putative                   | -0,1128 | 0,2142 |
| TcCLB.507867.90  | hypothetical protein, conserved                        | -0,1128 | 0,4273 |
| TcCLB.506735.20  | hypothetical protein, conserved                        | -0,1129 | 0,3597 |
| TcCLB.511409.20  | hypothetical protein, conserved                        | -0,1129 | 0,527  |

|                  |                                                          |         |        |
|------------------|----------------------------------------------------------|---------|--------|
| TcCLB.504147.190 | hypothetical protein, conserved                          | -0,113  | 0,248  |
| TcCLB.506529.180 | hypothetical protein, conserved                          | -0,113  | 0,5774 |
| TcCLB.510719.300 | metallo-peptidase, Clan MC, Family M14, putative         | -0,1131 | 0,2367 |
| TcCLB.509345.11  | retrotransposon hot spot protein (RHS, pseudogene), puta | -0,1132 | 0,3058 |
| TcCLB.506201.4   | hypothetical protein, conserved                          | -0,1133 | 0,4796 |
| TcCLB.506459.140 | hypothetical protein                                     | -0,1133 | 0,7558 |
| TcCLB.510729.115 | hypothetical protein                                     | -0,1134 | 0,3251 |
| TcCLB.508465.140 | hypothetical protein, conserved                          | -0,1135 | 0,2223 |
| TcCLB.510349.80  | protein kinase, putative                                 | -0,1135 | 0,2383 |
| TcCLB.507529.40  | hypothetical protein, conserved                          | -0,1135 | 0,3109 |
| TcCLB.507031.150 | hypothetical protein, conserved                          | -0,1136 | 0,1986 |
| TcCLB.511283.210 | hypothetical protein, conserved                          | -0,1136 | 0,2362 |
| TcCLB.506529.400 | hypothetical protein, conserved                          | -0,1136 | 0,4446 |
| TcCLB.509719.30  | hypothetical protein, conserved                          | -0,1137 | 0,3895 |
| TcCLB.503733.50  | hypothetical protein, conserved (pseudogene)             | -0,1137 | 0,4472 |
| TcCLB.506625.90  | hypothetical protein, conserved                          | -0,1137 | 0,4693 |
| TcCLB.507041.50  | hypothetical protein, conserved                          | -0,1137 | 0,5185 |
| TcCLB.510159.19  | hypothetical protein, conserved (fragment)               | -0,1137 | 0,5785 |
| TcCLB.510141.4   | hypothetical protein, conserved (fragment)               | -0,1139 | 0,432  |
| TcCLB.507027.80  | hypothetical protein, conserved                          | -0,114  | 0,2754 |
| TcCLB.508837.74  | small GTP-binding protein Rab18, putative                | -0,114  | 0,3334 |
| TcCLB.503865.30  | hypothetical protein, conserved                          | -0,114  | 0,3356 |
| TcCLB.509789.40  | hypothetical protein, conserved                          | -0,114  | 0,3814 |
| TcCLB.511625.30  | hypothetical protein, conserved                          | -0,114  | 0,389  |
| TcCLB.507091.20  | hypothetical protein, conserved                          | -0,1141 | 0,3209 |
| TcCLB.510661.150 | hypothetical protein, conserved                          | -0,1141 | 0,3861 |
| TcCLB.511589.209 | hypothetical protein, conserved                          | -0,1141 | 0,6016 |
| TcCLB.505183.5   | hypothetical protein, conserved (fragment)               | -0,1142 | 0,4195 |
| TcCLB.507713.10  | hypothetical protein, conserved                          | -0,1142 | 0,5951 |
| TcCLB.511657.10  | protein kinase, putative                                 | -0,1145 | 0,5682 |
| TcCLB.507007.40  | hypothetical protein, conserved                          | -0,1148 | 0,3935 |
| TcCLB.507641.290 | chaperonin HSP60, mitochondrial precursor (HSP60)        | -0,1148 | 0,7903 |
| TcCLB.504213.110 | Putrescine-cadaverine transporter (POT1.1)               | -0,1149 | 0,1848 |
| TcCLB.503981.70  | hypothetical protein, conserved                          | -0,1149 | 0,3349 |
| TcCLB.508119.180 | hypothetical protein, conserved                          | -0,1149 | 0,48   |
| TcCLB.447801.10  | hypothetical protein, conserved (fragment)               | -0,1149 | 0,5008 |
| TcCLB.460747.20  | hypothetical protein, conserved                          | -0,1151 | 0,2934 |
| TcCLB.508879.220 | hypothetical protein, conserved                          | -0,1151 | 0,3047 |
| TcCLB.508413.40  | serine/threonine protein phosphatase, putative           | -0,1153 | 0,3025 |
| TcCLB.510077.20  | trans-sialidase (pseudogene), putative                   | -0,1153 | 0,3097 |
| TcCLB.506525.10  | nuclear segregation protein, putative                    | -0,1154 | 0,1075 |
| TcCLB.507017.110 | hypothetical protein, conserved                          | -0,1154 | 0,3024 |
| TcCLB.507031.10  | hypothetical protein, conserved                          | -0,1154 | 0,362  |
| TcCLB.510741.100 | hypothetical protein, conserved                          | -0,1154 | 0,4025 |
| TcCLB.503959.20  | hypothetical protein, conserved                          | -0,1157 | 0,2801 |



|                  |                                                          |         |        |
|------------------|----------------------------------------------------------|---------|--------|
| TcCLB.503923.30  | hypothetical protein, conserved                          | -0,1158 | 0,3715 |
| TcCLB.510535.40  | hypothetical protein, conserved                          | -0,1158 | 0,4091 |
| TcCLB.511223.10  | hypothetical protein                                     | -0,1158 | 0,7216 |
| TcCLB.511911.102 | hypothetical protein, conserved                          | -0,116  | 0,4051 |
| TcCLB.511529.110 | hypothetical protein, conserved                          | -0,116  | 0,4689 |
| TcCLB.511361.20  | hypothetical protein, conserved                          | -0,116  | 0,5337 |
| TcCLB.504255.30  | hypothetical protein, conserved                          | -0,116  | 0,5391 |
| TcCLB.504109.195 | N-acetyltransferase complex ARD1 subunit (pseudogene),   | -0,1161 | 0,7283 |
| TcCLB.504029.50  | hypothetical protein, conserved                          | -0,1162 | 0,3512 |
| TcCLB.507257.130 | hypothetical protein, conserved                          | -0,1163 | 0,4689 |
| TcCLB.509603.19  | malonyl-CoA decarboxylase, mitochondrial precursor, puta | -0,1163 | 0,5933 |
| TcCLB.473755.9   | hypothetical protein, conserved                          | -0,1164 | 0,3576 |
| TcCLB.507521.90  | hypothetical protein, conserved                          | -0,1165 | 0,4917 |
| TcCLB.507025.40  | hypothetical protein                                     | -0,1166 | 0,3909 |
| TcCLB.509031.6   | hypothetical protein, conserved                          | -0,1166 | 0,5058 |
| TcCLB.508153.260 | hypothetical protein, conserved                          | -0,1166 | 0,5168 |
| TcCLB.503879.60  | hypothetical protein, conserved                          | -0,1169 | 0,3749 |
| TcCLB.507897.30  | serine/threonine-protein kinase a, putative              | -0,1169 | 0,3999 |
| TcCLB.510359.90  | hypothetical protein, conserved                          | -0,1169 | 0,4489 |
| TcCLB.511049.10  | hypothetical protein, conserved (pseudogene)             | -0,1169 | 0,478  |
| TcCLB.508593.90  | hypothetical protein, conserved                          | -0,1172 | 0,4078 |
| TcCLB.505183.80  | signal recognition particle, putative                    | -0,1174 | 0,199  |
| TcCLB.506855.320 | hypothetical protein, conserved                          | -0,1174 | 0,4383 |
| TcCLB.503897.30  | hypothetical protein, conserved                          | -0,1175 | 0,3641 |
| TcCLB.503909.76  | ferric reductase transmembrane protein, putative         | -0,1176 | 0,6693 |
| TcCLB.510421.190 | hypothetical protein, conserved                          | -0,1177 | 0,3696 |
| TcCLB.509201.20  | hypothetical protein, conserved                          | -0,1177 | 0,7016 |
| TcCLB.506679.50  | pre-mRNA splicing factor ATP-dependent RNA helicase, p   | -0,1178 | 0,1839 |
| TcCLB.508059.40  | syntaxin, putative                                       | -0,118  | 0,4813 |
| TcCLB.504075.3   | calmodulin, putative                                     | -0,1181 | 0,7022 |
| TcCLB.507669.230 | hypothetical protein, conserved                          | -0,1182 | 0,2103 |
| TcCLB.506883.130 | hypothetical protein, conserved (pseudogene)             | -0,1182 | 0,7066 |
| TcCLB.504129.30  | hypothetical protein, conserved                          | -0,1183 | 0,3057 |
| TcCLB.506513.24  | hypothetical protein, conserved                          | -0,1185 | 0,3923 |
| TcCLB.509455.40  | hypothetical protein, conserved                          | -0,1186 | 0,3197 |
| TcCLB.511293.90  | hypothetical protein, conserved                          | -0,1186 | 0,3457 |
| TcCLB.506871.50  | ubiquitin hydrolase, putative                            | -0,1186 | 0,4239 |
| TcCLB.508445.60  | hypothetical protein, conserved                          | -0,1188 | 0,3437 |
| TcCLB.511693.130 | hypothetical protein                                     | -0,1189 | 0,3219 |
| TcCLB.507639.100 | phosphatidylinositol N-acetylglucosaminyltransferase sub | -0,1189 | 0,4685 |
| TcCLB.509267.10  | hypothetical protein, conserved                          | -0,119  | 0,214  |
| TcCLB.508919.50  | hypothetical protein                                     | -0,119  | 0,3372 |
| TcCLB.509195.70  | mucin-associated surface protein (MASP), putative        | -0,119  | 0,5119 |
| TcCLB.511603.369 | surface protease GP63 (pseudogene), putative             | -0,1191 | 0,7944 |
| TcCLB.507513.40  | hypothetical protein, conserved                          | -0,1192 | 0,4225 |

|                  |                                                          |         |        |
|------------------|----------------------------------------------------------|---------|--------|
| TcCLB.506863.60  | hypothetical protein, conserved                          | -0,1193 | 0,3358 |
| TcCLB.510963.39  | hypothetical protein, conserved                          | -0,1195 | 0,4413 |
| TcCLB.511255.410 | surface protease GP63 (pseudogene), putative             | -0,1195 | 0,7399 |
| TcCLB.511071.120 | hypothetical protein, conserved                          | -0,1197 | 0,2321 |
| TcCLB.506625.190 | hypothetical protein, conserved                          | -0,1197 | 0,5243 |
| TcCLB.508083.5   | elongation factor 1-gamma (EF-1-gamma, pseudogene),      | -0,1197 | 0,7237 |
| TcCLB.509267.70  | hypothetical protein                                     | -0,1198 | 0,2086 |
| TcCLB.511109.100 | DNA replication licensing factor MCM3, putative          | -0,1199 | 0,474  |
| TcCLB.511367.110 | hypothetical protein, conserved                          | -0,12   | 0,3966 |
| TcCLB.503669.30  | hypothetical protein, conserved                          | -0,1201 | 0,4032 |
| TcCLB.506909.160 | trans-sialidase, Group V, putative                       | -0,1202 | 0,5428 |
| TcCLB.503697.9   | proteasome regulatory non-ATPase subunit 11, putative (f | -0,1203 | 0,2916 |
| TcCLB.511857.30  | glycosyl transferase-like protein, putative              | -0,1204 | 0,4468 |
| TcCLB.507641.300 | chaperonin HSP60, mitochondrial precursor (HSP60)        | -0,1204 | 0,8413 |
| TcCLB.508059.24  | hypothetical protein, conserved                          | -0,1205 | 0,3221 |
| TcCLB.506039.30  | dispersed gene family protein 1 (DGF-1), putative        | -0,1205 | 0,7049 |
| TcCLB.503983.20  | dihydroxyacetone kinase 1-like, putative                 | -0,1206 | 0,2879 |
| TcCLB.506739.130 | protein phosphatase 1 catalitic subunit, putative        | -0,1207 | 0,3169 |
| TcCLB.510555.41  | hypothetical protein, conserved (pseudogene)             | -0,1207 | 0,7317 |
| TcCLB.506853.60  | hypothetical protein, conserved                          | -0,1208 | 0,4166 |
| TcCLB.510155.94  | hypothetical protein, conserved                          | -0,1209 | 0,2936 |
| TcCLB.508355.104 | hypothetical protein, conserved                          | -0,121  | 0,5332 |
| TcCLB.510947.44  | hypothetical protein, conserved                          | -0,1211 | 0,4087 |
| TcCLB.510513.70  | hypothetical protein, conserved                          | -0,1213 | 0,2923 |
| TcCLB.509269.10  | hypothetical protein, conserved                          | -0,1214 | 0,3519 |
| TcCLB.511291.129 | hypothetical protein, conserved                          | -0,1215 | 0,5348 |
| TcCLB.511127.20  | calcium binding protein EF hand, putative                | -0,1216 | 0,1941 |
| TcCLB.509451.70  | hypothetical protein, conserved                          | -0,1216 | 0,2033 |
| TcCLB.508961.40  | hypothetical protein, conserved                          | -0,1216 | 0,2654 |
| TcCLB.511421.30  | hypothetical protein, conserved                          | -0,1216 | 0,3647 |
| TcCLB.506751.20  | mucin-associated surface protein (MASP, pseudogene), pi  | -0,1216 | 0,7305 |
| TcCLB.510359.200 | hypothetical protein, conserved                          | -0,1221 | 0,2002 |
| TcCLB.510491.40  | hypothetical protein, conserved                          | -0,1221 | 0,4236 |
| TcCLB.510729.40  | hypothetical protein, conserved                          | -0,1221 | 0,4346 |
| TcCLB.510187.140 | hypothetical protein, conserved                          | -0,1222 | 0,1675 |
| TcCLB.506337.130 | hypothetical protein, conserved                          | -0,1223 | 0,3883 |
| TcCLB.506367.60  | vacuolar protein sorting protein 16, putative            | -0,1224 | 0,2112 |
| TcCLB.503851.10  | Elongator-like Protein 3a, putative                      | -0,1224 | 0,396  |
| TcCLB.511445.80  | hypothetical protein, conserved                          | -0,1225 | 0,3314 |
| TcCLB.510431.20  | hypothetical protein, conserved                          | -0,1226 | 0,4131 |
| TcCLB.503911.30  | hypothetical protein, conserved                          | -0,1227 | 0,2642 |
| TcCLB.503805.40  | hypothetical protein                                     | -0,1227 | 0,2908 |
| TcCLB.510275.180 | elongation factor 1-gamma (EF-1-gamma), putative         | -0,1228 | 0,8151 |
| TcCLB.508739.80  | hypothetical protein, conserved                          | -0,123  | 0,1835 |
| TcCLB.506933.50  | hypothetical protein, conserved                          | -0,123  | 0,2804 |

|                  |                                                          |         |        |
|------------------|----------------------------------------------------------|---------|--------|
| TcCLB.507057.30  | arginine N-methyltransferase, type I (PRMT6)             | -0,1231 | 0,4432 |
| TcCLB.508647.230 | synaptojanin (pseudogene), putative                      | -0,1232 | 0,1486 |
| TcCLB.506251.40  | hypothetical protein                                     | -0,1232 | 0,2056 |
| TcCLB.506789.290 | hypothetical protein, conserved                          | -0,1232 | 0,2143 |
| TcCLB.507641.230 | hypothetical protein, conserved                          | -0,1234 | 0,256  |
| TcCLB.511649.30  | hypothetical protein, conserved                          | -0,1234 | 0,312  |
| TcCLB.505941.20  | surface protease GP63 (pseudogene), putative             | -0,1236 | 0,562  |
| TcCLB.506247.20  | hypothetical protein                                     | -0,1237 | 0,2712 |
| TcCLB.509399.180 | hypothetical protein, conserved                          | -0,1237 | 0,5091 |
| TcCLB.506241.124 | ankyrin repeat protein, putative                         | -0,1239 | 0,182  |
| TcCLB.506467.10  | hypothetical protein, conserved                          | -0,1239 | 0,3182 |
| TcCLB.507019.140 | CDC16, putative                                          | -0,1239 | 0,3387 |
| TcCLB.509619.20  | hypothetical protein, conserved (pseudogene)             | -0,1239 | 0,4873 |
| TcCLB.507801.70  | protein kinase, putative                                 | -0,1239 | 0,4911 |
| TcCLB.507737.30  | hypothetical protein, conserved                          | -0,124  | 0,3363 |
| TcCLB.506211.180 | mitogen-activated protein kinase 9, putative (MPK9)      | -0,1241 | 0,2522 |
| TcCLB.509633.30  | hypothetical protein, conserved                          | -0,1243 | 0,2953 |
| TcCLB.506363.80  | aminoacylase, putative                                   | -0,1243 | 0,746  |
| TcCLB.504245.9   | hypothetical protein, conserved                          | -0,1244 | 0,3513 |
| TcCLB.510381.70  | hypothetical protein, conserved                          | -0,1244 | 0,5406 |
| TcCLB.504769.5   | hypothetical protein                                     | -0,1245 | 0,4064 |
| TcCLB.504131.30  | ubiquitin-activating enzyme, putative                    | -0,1247 | 0,2869 |
| TcCLB.503863.9   | hypothetical protein, conserved                          | -0,1247 | 0,3756 |
| TcCLB.508197.30  | hypothetical protein, conserved                          | -0,1248 | 0,173  |
| TcCLB.510351.140 | hypothetical protein, conserved                          | -0,1248 | 0,4797 |
| TcCLB.503931.14  | hypothetical protein, conserved                          | -0,125  | 0,3238 |
| TcCLB.510105.120 | protein kinase, putative                                 | -0,125  | 0,3416 |
| TcCLB.508879.160 | hypothetical protein, conserved                          | -0,1252 | 0,1905 |
| TcCLB.510543.30  | trans-sialidase (pseudogene), putative                   | -0,1255 | 0,6772 |
| TcCLB.509937.90  | hypothetical protein, conserved                          | -0,1257 | 0,342  |
| TcCLB.508737.200 | hypothetical protein, conserved                          | -0,1261 | 0,1556 |
| TcCLB.507011.70  | hypothetical protein                                     | -0,1261 | 0,3576 |
| TcCLB.508277.60  | hypothetical protein, conserved                          | -0,1262 | 0,1308 |
| TcCLB.511421.40  | transmembrane protein, putative                          | -0,1262 | 0,3472 |
| TcCLB.503987.10  | cop-coated vesicle membrane protein p24 precursor, puta  | -0,1263 | 0,244  |
| TcCLB.507711.60  | hypothetical protein, conserved                          | -0,1263 | 0,3142 |
| TcCLB.503535.9   | hypothetical protein, conserved                          | -0,1264 | 0,1636 |
| TcCLB.509217.70  | hypothetical protein, conserved (pseudogene)             | -0,1265 | 0,4354 |
| TcCLB.507711.340 | hypothetical protein, conserved                          | -0,1266 | 0,4167 |
| TcCLB.508139.80  | trans-sialidase (pseudogene), putative                   | -0,1266 | 0,4367 |
| TcCLB.503957.30  | retrotransposon hot spot (RHS) protein, putative         | -0,1267 | 0,3803 |
| TcCLB.507811.50  | hypothetical protein, conserved                          | -0,1268 | 0,2935 |
| TcCLB.507643.30  | retrotransposon hot spot protein (RHS, pseudogene), puta | -0,1269 | 0,275  |
| TcCLB.508739.40  | hypothetical protein, conserved                          | -0,127  | 0,216  |
| TcCLB.506405.4   | hypothetical protein, conserved (fragment)               | -0,127  | 0,272  |

|                   |                                                   |         |        |
|-------------------|---------------------------------------------------|---------|--------|
| TcCLB.506733.50   | actin-like protein, putative                      | -0,127  | 0,2805 |
| TcCLB.510963.30   | mRNA capping methyltransferase, putative          | -0,127  | 0,3748 |
| TcCLB.511099.20   | trans-sialidase (pseudogene), putative            | -0,127  | 0,7768 |
| TcCLB.506337.190  | hypothetical protein, conserved                   | -0,1271 | 0,2961 |
| TcCLB.504167.30   | protein kinase, putative                          | -0,1273 | 0,3615 |
| TcCLB.504103.50   | hypothetical protein, conserved                   | -0,1274 | 0,2934 |
| TcCLB.508479.230  | peroxin-2, putative                               | -0,1275 | 0,3774 |
| TcCLB.506451.13   | hypothetical protein (pseudogene)                 | -0,1275 | 0,5332 |
| TcCLB.509099.160  | hypothetical protein, conserved                   | -0,1276 | 0,1695 |
| TcCLB.506275.60   | zinc carboxypeptidase, putative                   | -0,1276 | 0,2479 |
| TcCLB.419833.10   | vacuolar protein sorting 18, putative             | -0,1276 | 0,4066 |
| TcCLB.506401.370  | hypothetical protein, conserved                   | -0,1278 | 0,3472 |
| TcCLB.509979.20   | hypothetical protein, conserved                   | -0,1279 | 0,2339 |
| TcCLB.509859.20   | hypothetical protein, conserved                   | -0,128  | 0,2765 |
| TcCLB.507083.70   | Iron-sulfur assembly protein 1, putative (Isa1)   | -0,128  | 0,2949 |
| TcCLB.510901.140  | hypothetical protein, conserved                   | -0,128  | 0,3544 |
| TcCLB.507159.41   | hypothetical protein, conserved                   | -0,1281 | 0,5341 |
| TcCLB.506425.20   | hypothetical protein                              | -0,1284 | 0,3572 |
| TcCLB.511183.565  | surface protease GP63 (pseudogene), putative      | -0,1284 | 0,784  |
| TcCLB.511731.89   | hypothetical protein, conserved                   | -0,1285 | 0,3845 |
| TcCLB.511753.140  | vacuolar assembly protein vps41, putative         | -0,1285 | 0,4295 |
| TcCLB.508015.10   | hypothetical protein                              | -0,1285 | 0,5129 |
| TcCLB.508321.30   | hypothetical protein, conserved                   | -0,1285 | 0,5417 |
| TcCLB.508737.160  | hypothetical protein, conserved                   | -0,1288 | 0,204  |
| TcCLB.506615.75   | surface protease GP63 (pseudogene), putative      | -0,1288 | 0,2635 |
| TcCLB.510889.340  | hypothetical protein, conserved                   | -0,129  | 0,5228 |
| TcCLB.509247.20   | ras-related protein Rab21, putative (RAB21)       | -0,1291 | 0,3407 |
| TcCLB.505073.30   | mu-adaptin 4, putative                            | -0,1292 | 0,3749 |
| TcCLB.509481.10   | trans-sialidase, putative                         | -0,1292 | 0,7354 |
| TcCLB.508153.1090 | hypothetical protein, conserved                   | -0,1293 | 0,2441 |
| TcCLB.509243.40   | hypothetical protein, conserved (pseudogene)      | -0,1293 | 0,3035 |
| TcCLB.507709.40   | hypothetical protein, conserved                   | -0,1293 | 0,338  |
| TcCLB.509573.60   | hypothetical protein, conserved                   | -0,1294 | 0,4494 |
| TcCLB.508857.100  | hypothetical protein, conserved                   | -0,1295 | 0,2361 |
| TcCLB.510901.130  | hypothetical protein, conserved                   | -0,1295 | 0,3271 |
| TcCLB.508153.30   | Protein tilB homolog, putative (LRTP)             | -0,1295 | 0,3382 |
| TcCLB.511507.20   | hypothetical protein, conserved                   | -0,1297 | 0,2992 |
| TcCLB.506693.7    | hypothetical protein, conserved                   | -0,13   | 0,4891 |
| TcCLB.510413.10   | hypothetical protein, conserved (pseudogene)      | -0,13   | 0,5358 |
| TcCLB.509073.20   | hypothetical protein, conserved                   | -0,1301 | 0,1175 |
| TcCLB.425785.9    | hypothetical protein, conserved                   | -0,1302 | 0,4194 |
| TcCLB.506855.340  | U4/U6 small nuclear ribonuclear protein, putative | -0,1304 | 0,2831 |
| TcCLB.508075.50   | hypothetical protein, conserved                   | -0,1305 | 0,2398 |
| TcCLB.509527.90   | trans-sialidase (pseudogene), putative            | -0,1306 | 0,2346 |
| TcCLB.482319.19   | hypothetical protein, conserved                   | -0,1306 | 0,3994 |

|                  |                                                          |         |         |
|------------------|----------------------------------------------------------|---------|---------|
| TcCLB.509207.130 | peptidyl-prolyl cis-trans isomerase (PAR45)              | -0,1307 | 0,2034  |
| TcCLB.506577.160 | hypothetical protein, conserved                          | -0,1307 | 0,336   |
| TcCLB.503689.34  | hypothetical protein, conserved                          | -0,1307 | 0,5635  |
| TcCLB.508135.10  | hypothetical protein, conserved                          | -0,1308 | 0,3195  |
| TcCLB.508547.190 | hypothetical protein, conserved                          | -0,1309 | 0,2935  |
| TcCLB.506127.90  | hypothetical protein, conserved                          | -0,1311 | 0,08165 |
| TcCLB.506537.110 | hypothetical protein, conserved                          | -0,1314 | 0,4485  |
| TcCLB.511021.51  | hypothetical protein, conserved                          | -0,1315 | 0,4238  |
| TcCLB.510553.25  | elongation factor 1-gamma (EF-1-gamma, pseudogene),      | -0,1315 | 0,7796  |
| TcCLB.510129.20  | surface glycoprotein, putative                           | -0,1317 | 0,247   |
| TcCLB.509179.30  | hypothetical protein, conserved                          | -0,1317 | 0,2954  |
| TcCLB.511391.210 | mitochondrial calcium uptake 1, putative                 | -0,1319 | 0,1826  |
| TcCLB.510769.80  | ankyrin repeat protein, putative                         | -0,132  | 0,195   |
| TcCLB.510287.40  | hypothetical protein                                     | -0,132  | 0,3187  |
| TcCLB.506147.170 | hypothetical protein, conserved                          | -0,1322 | 0,1498  |
| TcCLB.509507.30  | hypothetical protein, conserved                          | -0,1322 | 0,201   |
| TcCLB.509151.20  | hypothetical protein                                     | -0,1322 | 0,2884  |
| TcCLB.507041.100 | ATP-dependent protease binding subunit (pseudogene), p   | -0,1322 | 0,3034  |
| TcCLB.508289.80  | trans-sialidase (pseudogene), putative                   | -0,1322 | 0,6942  |
| TcCLB.508821.10  | katanin, putative                                        | -0,1323 | 0,4166  |
| TcCLB.508859.50  | hypothetical protein, conserved                          | -0,1325 | 0,3787  |
| TcCLB.511283.10  | nuclear segregation protein, putative                    | -0,1326 | 0,143   |
| TcCLB.503891.120 | dynein light chain, putative                             | -0,1326 | 0,3698  |
| TcCLB.508263.30  | kinesin, putative                                        | -0,1327 | 0,2547  |
| TcCLB.507709.44  | hypothetical protein, conserved                          | -0,1327 | 0,2612  |
| TcCLB.507837.10  | Peptidase C50 separase, putative                         | -0,1328 | 0,3202  |
| TcCLB.506177.20  | lectin, putative                                         | -0,1329 | 0,2452  |
| TcCLB.509767.44  | hypothetical protein, conserved                          | -0,1329 | 0,2771  |
| TcCLB.503917.14  | hypothetical protein, conserved                          | -0,1334 | 0,2926  |
| TcCLB.504129.50  | hypothetical protein, conserved (pseudogene)             | -0,1334 | 0,5077  |
| TcCLB.511849.15  | mucin-associated surface protein (MASP, pseudogene), p   | -0,1335 | 0,22    |
| TcCLB.504153.320 | Golgi reassembly stacking protein (GRASP homologue), p   | -0,1335 | 0,3487  |
| TcCLB.509297.30  | ADP-ribosylation factor, putative                        | -0,1336 | 0,7397  |
| TcCLB.508153.690 | hypothetical protein                                     | -0,1336 | 0,7936  |
| TcCLB.509429.120 | Mitochondrial Ribosomal Protein of Small Subunit 29, put | -0,1337 | 0,2781  |
| TcCLB.505807.270 | ubiquitin hydrolase, putative                            | -0,1337 | 0,3282  |
| TcCLB.511315.9   | ATP-dependent RNA helicase, putative                     | -0,1339 | 0,433   |
| TcCLB.506605.174 | hypothetical protein, conserved                          | -0,134  | 0,4365  |
| TcCLB.508707.80  | RNA-binding protein, putative                            | -0,1341 | 0,2764  |
| TcCLB.508723.30  | bilobe protein, conserved                                | -0,1342 | 0,3173  |
| TcCLB.511315.30  | hypothetical protein, conserved                          | -0,1342 | 0,4234  |
| TcCLB.510701.50  | mucin TcMUC (pseudogene), putative                       | -0,1342 | 0,7261  |
| TcCLB.507981.61  | hypothetical protein                                     | -0,1343 | 0,689   |
| TcCLB.510301.40  | hypothetical protein, conserved                          | -0,1344 | 0,2825  |
| TcCLB.506957.110 | SNF-7-like protein, putative                             | -0,1346 | 0,2646  |

|                   |                                                           |         |        |
|-------------------|-----------------------------------------------------------|---------|--------|
| TcCLB.507053.30   | hypothetical protein, conserved                           | -0,1347 | 0,166  |
| TcCLB.506993.31   | mucin-associated surface protein (MASP, pseudogene), pi   | -0,1347 | 0,7608 |
| TcCLB.509437.80   | hypothetical protein, conserved                           | -0,1348 | 0,3013 |
| TcCLB.509215.20   | hypothetical protein, conserved                           | -0,1348 | 0,457  |
| TcCLB.511671.100  | hypothetical protein, conserved                           | -0,1349 | 0,4394 |
| TcCLB.506941.90   | ATP-dependent DEAD/H DNA helicase recQ family, putati     | -0,135  | 0,1448 |
| TcCLB.507611.330  | hypothetical protein, conserved                           | -0,135  | 0,3446 |
| TcCLB.508625.150  | L-ribulokinase, putative                                  | -0,135  | 0,4044 |
| TcCLB.507549.40   | trans-sialidase (pseudogene), putative                    | -0,1351 | 0,4657 |
| TcCLB.511461.4    | hypothetical protein, conserved (fragment)                | -0,1352 | 0,458  |
| TcCLB.511001.210  | hypothetical protein, conserved                           | -0,1354 | 0,2936 |
| TcCLB.506567.120  | mitochondrial RNA binding protein, putative               | -0,1354 | 0,3574 |
| TcCLB.508231.204  | hypothetical protein, conserved                           | -0,1355 | 0,3694 |
| TcCLB.511109.70   | hypothetical protein, conserved                           | -0,1356 | 0,1671 |
| TcCLB.508895.10   | C-terminal motor kinesin, putative                        | -0,1356 | 0,4151 |
| TcCLB.511867.60   | hypothetical protein, conserved                           | -0,1357 | 0,342  |
| TcCLB.504105.170  | hypothetical protein, conserved                           | -0,1358 | 0,1077 |
| TcCLB.509669.60   | hypothetical protein, conserved                           | -0,1358 | 0,3584 |
| TcCLB.511521.24   | hypothetical protein, conserved                           | -0,1358 | 0,581  |
| TcCLB.507193.10   | dispersed gene family protein 1 (DGF-1), putative         | -0,1358 | 0,5939 |
| TcCLB.511389.50   | hypothetical protein, conserved                           | -0,1359 | 0,1398 |
| TcCLB.508355.180  | hypothetical protein, conserved                           | -0,1361 | 0,2958 |
| TcCLB.506213.70   | hypothetical protein, conserved                           | -0,1362 | 0,2738 |
| TcCLB.503823.80   | hypothetical protein, conserved                           | -0,1362 | 0,4205 |
| TcCLB.507103.20   | hypothetical protein                                      | -0,1363 | 0,1049 |
| TcCLB.510351.40   | ATP-dependent RNA helicase, putative                      | -0,1363 | 0,17   |
| TcCLB.504111.10   | hypothetical protein, conserved                           | -0,1363 | 0,1756 |
| TcCLB.507517.70   | hypothetical protein, conserved                           | -0,1363 | 0,2869 |
| TcCLB.511589.120  | DNA topoisomerase III, putative                           | -0,1363 | 0,2962 |
| TcCLB.510903.70   | hypothetical protein, conserved                           | -0,1364 | 0,2299 |
| TcCLB.508119.110  | kynureninase, putative                                    | -0,1364 | 0,394  |
| TcCLB.511277.340  | paralyzed flagella protein 20 (PF20)                      | -0,1365 | 0,1806 |
| TcCLB.511907.280  | hypothetical protein, conserved                           | -0,1365 | 0,2119 |
| TcCLB.508119.160  | hypothetical protein, conserved                           | -0,1365 | 0,2304 |
| TcCLB.508995.40   | vesicular-fusion protein nsf, putative                    | -0,1366 | 0,288  |
| TcCLB.508959.20   | hypothetical protein, conserved                           | -0,1367 | 0,2856 |
| TcCLB.509437.125  | trans-sialidase (pseudogene), putative                    | -0,1367 | 0,6149 |
| TcCLB.506627.40   | hypothetical protein, conserved                           | -0,1368 | 0,285  |
| TcCLB.506773.110  | hypothetical protein, conserved                           | -0,1369 | 0,1978 |
| TcCLB.508461.143  | hypothetical protein, conserved                           | -0,1369 | 0,4348 |
| TcCLB.511287.70   | hypothetical protein, conserved                           | -0,137  | 0,4489 |
| TcCLB.509621.10   | hypothetical protein, conserved                           | -0,1371 | 0,2245 |
| TcCLB.506367.120  | hypothetical protein, conserved                           | -0,1372 | 0,1184 |
| TcCLB.508153.1030 | hypothetical protein, conserved                           | -0,1372 | 0,1383 |
| TcCLB.508593.150  | puromycin-sensitive aminopeptidase-like protein, putative | -0,1373 | 0,176  |

|                  |                                                              |         |         |
|------------------|--------------------------------------------------------------|---------|---------|
| TcCLB.511657.20  | protein kinase, putative                                     | -0,1374 | 0,2496  |
| TcCLB.508815.60  | hypothetical protein, conserved                              | -0,1374 | 0,3332  |
| TcCLB.503889.5   | hypothetical protein                                         | -0,1376 | 0,5028  |
| TcCLB.511755.60  | ATP-dependent RNA helicase, putative                         | -0,1378 | 0,09438 |
| TcCLB.507467.90  | diacylglycerol acyltransferase, putative                     | -0,1378 | 0,2     |
| TcCLB.503791.20  | hypothetical protein, conserved                              | -0,1378 | 0,5136  |
| TcCLB.508919.150 | retrotransposon hot spot protein (RHS, pseudogene), puta     | -0,1379 | 0,4558  |
| TcCLB.503819.30  | eukaryotic translation initiation factor 2 subunit, putative | -0,138  | 0,1143  |
| TcCLB.511585.310 | trans-sialidase (pseudogene), putative                       | -0,138  | 0,4103  |
| TcCLB.504157.70  | hypothetical protein, conserved                              | -0,1381 | 0,1416  |
| TcCLB.508153.970 | AGC/RSK family serine/threonine kinase, putative             | -0,1382 | 0,3682  |
| TcCLB.509201.10  | hypothetical protein, conserved                              | -0,1384 | 0,1807  |
| TcCLB.507019.130 | hypothetical protein                                         | -0,1385 | 0,4089  |
| TcCLB.506941.60  | phospholipid-translocating P-type ATPase (flippase), puta    | -0,1387 | 0,3097  |
| TcCLB.507093.210 | myosin heavy chain, putative                                 | -0,1388 | 0,09634 |
| TcCLB.511627.100 | TPR-repeat protein, putative                                 | -0,1388 | 0,2597  |
| TcCLB.510101.210 | hypothetical protein, conserved                              | -0,139  | 0,1855  |
| TcCLB.511287.160 | hypothetical protein, conserved                              | -0,139  | 0,2     |
| TcCLB.508527.20  | retrotransposon hot spot protein (RHS, pseudogene), puta     | -0,1391 | 0,1185  |
| TcCLB.511871.20  | hypothetical protein, conserved                              | -0,1396 | 0,2479  |
| TcCLB.508889.10  | hypothetical protein, conserved                              | -0,1397 | 0,1975  |
| TcCLB.506175.5   | hypothetical protein, conserved                              | -0,1398 | 0,4107  |
| TcCLB.508909.160 | hypothetical protein, conserved                              | -0,1398 | 0,4568  |
| TcCLB.508809.30  | ABC transporter family-like protein                          | -0,1399 | 0,1922  |
| TcCLB.510295.40  | Protein C21orf2 homolog, putative                            | -0,1399 | 0,2179  |
| TcCLB.504215.40  | actin-related protein 2/3 complex subunit 1, putative (ARI   | -0,14   | 0,2701  |
| TcCLB.507063.130 | protein kinase, putative                                     | -0,1401 | 0,127   |
| TcCLB.510219.20  | hypothetical protein, conserved                              | -0,1401 | 0,3935  |
| TcCLB.508909.50  | hypothetical protein, conserved                              | -0,1401 | 0,4269  |
| TcCLB.511903.140 | tubulin folding cofactor D (pseudogene), putative            | -0,1403 | 0,107   |
| TcCLB.510769.70  | hypothetical protein                                         | -0,1403 | 0,2497  |
| TcCLB.509915.35  | hypothetical protein, conserved (pseudogene)                 | -0,1403 | 0,4641  |
| TcCLB.510257.40  | hypothetical protein, conserved                              | -0,1405 | 0,2966  |
| TcCLB.503467.9   | NADH-dependent fumarate reductase, putative (fragment        | -0,1405 | 0,468   |
| TcCLB.506563.30  | coatamer beta subunit, putative                              | -0,1406 | 0,04761 |
| TcCLB.510221.39  | adenosine monophosphate deaminase, putative (fragmer         | -0,1406 | 0,252   |
| TcCLB.504625.60  | hydrogenase, putative                                        | -0,1407 | 0,2408  |
| TcCLB.506399.60  | hypothetical protein, conserved                              | -0,1408 | 0,2687  |
| TcCLB.506443.20  | hypothetical protein, conserved                              | -0,1408 | 0,3478  |
| TcCLB.506247.150 | hypothetical protein, conserved                              | -0,1408 | 0,3587  |
| TcCLB.508325.90  | hypothetical protein                                         | -0,1408 | 0,5423  |
| TcCLB.509561.110 | hypothetical protein, conserved                              | -0,1409 | 0,1826  |
| TcCLB.506739.80  | mitochondrial carrier protein, putative                      | -0,141  | 0,2157  |
| TcCLB.506739.209 | hypothetical protein, conserved                              | -0,141  | 0,318   |
| TcCLB.508625.20  | hypothetical protein, conserved                              | -0,141  | 0,4236  |

|                  |                                                           |         |         |
|------------------|-----------------------------------------------------------|---------|---------|
| TcCLB.505943.40  | hypothetical protein, conserved                           | -0,1411 | 0,1152  |
| TcCLB.504109.110 | cleavage and polyadenylation specificity factor, putative | -0,1411 | 0,2166  |
| TcCLB.509399.190 | pumilio/PUF RNA binding protein 4, putative (PUF4)        | -0,1411 | 0,4052  |
| TcCLB.506311.20  | palmitoyl acyltransferase 2, putative                     | -0,1412 | 0,2925  |
| TcCLB.509505.10  | protein disulfide isomerase, putative                     | -0,1413 | 0,3011  |
| TcCLB.510525.50  | hypothetical protein, conserved                           | -0,1417 | 0,1649  |
| TcCLB.506559.434 | hypothetical protein, conserved                           | -0,1417 | 0,2119  |
| TcCLB.508995.69  | pseudouridine synthase TruD, putative (fragment)          | -0,1417 | 0,2185  |
| TcCLB.506401.140 | hypothetical protein, conserved                           | -0,142  | 0,4972  |
| TcCLB.511585.160 | hypothetical protein, conserved                           | -0,1421 | 0,1962  |
| TcCLB.506925.90  | hypothetical protein, conserved                           | -0,1422 | 0,1499  |
| TcCLB.504157.90  | hypothetical protein, conserved                           | -0,1422 | 0,2619  |
| TcCLB.434259.10  | RNA polymerase-associated protein CTR9, putative          | -0,1422 | 0,3042  |
| TcCLB.510351.100 | hypothetical protein, conserved                           | -0,1422 | 0,3273  |
| TcCLB.509053.10  | ubiquitin-protein ligase, putative                        | -0,1423 | 0,2543  |
| TcCLB.506713.30  | ATP-dependent DEAD/H RNA helicase, putative               | -0,1424 | 0,1875  |
| TcCLB.511277.359 | phosphatidic acid phosphatase, putative                   | -0,1424 | 0,2486  |
| TcCLB.506743.210 | tubulin tyrosine ligase, putative                         | -0,1425 | 0,3705  |
| TcCLB.505683.10  | sterol 24-c-methyltransferase, putative                   | -0,1426 | 0,2414  |
| TcCLB.510943.110 | hypothetical protein, conserved                           | -0,1427 | 0,1823  |
| TcCLB.506407.70  | hypothetical protein, conserved                           | -0,1428 | 0,2763  |
| TcCLB.504867.40  | acetyltransferase, putative                               | -0,1428 | 0,2871  |
| TcCLB.507881.60  | protein kinase, putative                                  | -0,1428 | 0,4838  |
| TcCLB.506255.10  | hypothetical protein, conserved (pseudogene)              | -0,1429 | 0,4831  |
| TcCLB.398235.10  | protein kinase, putative (fragment)                       | -0,143  | 0,4939  |
| TcCLB.511109.120 | beta-ketoacyl synthase family protein, putative           | -0,1432 | 0,3277  |
| TcCLB.507787.90  | chaperone DNAJ protein, putative                          | -0,1434 | 0,09037 |
| TcCLB.510579.100 | hypothetical protein, conserved                           | -0,1434 | 0,2611  |
| TcCLB.506945.170 | thiosulfate sulfurtransferase, mitochondrial, putative    | -0,1436 | 0,2969  |
| TcCLB.503463.10  | protein kinase C substrate protein, heavy chain, putative | -0,1439 | 0,2842  |
| TcCLB.511283.184 | hypothetical protein, conserved                           | -0,144  | 0,3388  |
| TcCLB.507993.150 | hypothetical protein, conserved                           | -0,1441 | 0,1399  |
| TcCLB.506255.20  | hypothetical protein, conserved                           | -0,1441 | 0,4089  |
| TcCLB.506883.20  | hypothetical protein, conserved                           | -0,1442 | 0,2078  |
| TcCLB.511245.160 | fatty acid elongase, putative                             | -0,1445 | 0,5908  |
| TcCLB.510535.20  | hypothetical protein, conserved                           | -0,1446 | 0,1552  |
| TcCLB.511529.100 | hypothetical protein, conserved                           | -0,1446 | 0,2732  |
| TcCLB.511857.59  | katanin, putative                                         | -0,1446 | 0,2839  |
| TcCLB.510983.10  | hypothetical protein                                      | -0,1446 | 0,5187  |
| TcCLB.511075.60  | protein kinase, putative                                  | -0,1447 | 0,3268  |
| TcCLB.511745.60  | hypothetical protein                                      | -0,1447 | 0,5821  |
| TcCLB.508897.10  | GDP-mannose 4,6 dehydratase, putative                     | -0,1449 | 0,2841  |
| TcCLB.509069.20  | ATP binding protein-like protein, putative                | -0,145  | 0,2726  |
| TcCLB.511761.30  | hypothetical protein, conserved                           | -0,145  | 0,2875  |
| TcCLB.508275.9   | dynein heavy chain, putative (fragment)                   | -0,1451 | 0,2727  |



|                  |                                                          |         |         |
|------------------|----------------------------------------------------------|---------|---------|
| TcCLB.504111.49  | hypothetical protein, conserved                          | -0,1455 | 0,1639  |
| TcCLB.507911.36  | ATP-dependent DEAD/H RNA helicase (pseudogene), puta     | -0,1455 | 0,6597  |
| TcCLB.506615.21  | surface protease GP63 (pseudogene), putative             | -0,1455 | 0,6936  |
| TcCLB.507645.70  | Meckel syndrome type 1 protein, putative (fragment) (mk  | -0,1459 | 0,1628  |
| TcCLB.511435.49  | phosphatidylinositol 3-kinase, putative                  | -0,1459 | 0,5693  |
| TcCLB.507357.135 | hypothetical protein                                     | -0,1459 | 0,7323  |
| TcCLB.503583.70  | hypothetical protein, conserved                          | -0,146  | 0,2868  |
| TcCLB.511445.160 | copper-transporting ATPase-like protein, putative        | -0,1461 | 0,05711 |
| TcCLB.504533.10  | dispersed gene family protein 1 (DGF-1), putative        | -0,1461 | 0,4988  |
| TcCLB.510693.274 | mucin TcMUCII (pseudogene), putative                     | -0,1462 | 0,5295  |
| TcCLB.511671.30  | beta galactofuranosyl glycosyltransferase, putative      | -0,1463 | 0,6279  |
| TcCLB.506733.40  | katanin-like protein, putative                           | -0,1464 | 0,2956  |
| TcCLB.511859.40  | hypothetical protein, conserved                          | -0,1464 | 0,4188  |
| TcCLB.508605.10  | retrotransposon hot spot protein (RHS, pseudogene), puta | -0,1464 | 0,4854  |
| TcCLB.506925.30  | hypothetical protein, conserved                          | -0,1465 | 0,05063 |
| TcCLB.510431.100 | hypothetical protein, conserved                          | -0,1465 | 0,2025  |
| TcCLB.511867.120 | hypothetical protein, conserved                          | -0,1466 | 0,2398  |
| TcCLB.503801.70  | hypothetical protein                                     | -0,1467 | 0,2161  |
| TcCLB.509171.20  | hypothetical protein, conserved                          | -0,1468 | 0,1918  |
| TcCLB.462617.10  | dynein heavy chain (pseudogene), putative                | -0,1469 | 0,1366  |
| TcCLB.508641.260 | DNA-directed RNA polymerase, mitochondrial (MTRNAP)      | -0,147  | 0,0666  |
| TcCLB.511815.180 | hypothetical protein, conserved                          | -0,147  | 0,2779  |
| TcCLB.407477.20  | hypothetical protein, conserved                          | -0,147  | 0,3547  |
| TcCLB.511067.10  | tubulin folding cofactor D, putative                     | -0,1471 | 0,08791 |
| TcCLB.510671.31  | hypothetical protein, conserved                          | -0,1471 | 0,1922  |
| TcCLB.511255.516 | syntaxin binding protein (pseudogene), putative          | -0,1471 | 0,6837  |
| TcCLB.506275.9   | RNA polymerase-associated protein CDC73, putative        | -0,1473 | 0,326   |
| TcCLB.510719.250 | RNA polymerase-associated protein CDC73, putative        | -0,1474 | 0,1875  |
| TcCLB.508431.5   | hypothetical protein                                     | -0,1474 | 0,6724  |
| TcCLB.508083.20  | hypothetical protein, conserved                          | -0,1475 | 0,3165  |
| TcCLB.507519.70  | hypothetical protein, conserved                          | -0,1478 | 0,2302  |
| TcCLB.510089.90  | hypothetical protein, conserved                          | -0,1478 | 0,2586  |
| TcCLB.507945.30  | pseudouridine synthase TruD, putative (fragment)         | -0,1479 | 0,1634  |
| TcCLB.504071.70  | hypothetical protein, conserved                          | -0,148  | 0,06653 |
| TcCLB.507049.119 | hypothetical protein, conserved                          | -0,148  | 0,1432  |
| TcCLB.504253.30  | hypothetical protein, conserved                          | -0,1481 | 0,1971  |
| TcCLB.509915.55  | trans-sialidase (pseudogene), putative                   | -0,1481 | 0,5877  |
| TcCLB.507035.130 | hypothetical protein, conserved                          | -0,1483 | 0,1263  |
| TcCLB.507389.50  | hypothetical protein, conserved                          | -0,1483 | 0,2195  |
| TcCLB.508731.30  | calmodulin, putative                                     | -0,1483 | 0,2619  |
| TcCLB.504769.10  | hypothetical protein                                     | -0,1483 | 0,3576  |
| TcCLB.509537.90  | hypothetical protein, conserved                          | -0,1485 | 0,0915  |
| TcCLB.507735.69  | hypothetical protein, conserved                          | -0,1486 | 0,3196  |
| TcCLB.507197.10  | surface protease GP63, putative                          | -0,1487 | 0,1073  |
| TcCLB.511863.30  | hypothetical protein, conserved                          | -0,1487 | 0,2121  |

|                  |                                                          |         |        |
|------------------|----------------------------------------------------------|---------|--------|
| TcCLB.509173.9   | hypothetical protein, conserved                          | -0,1487 | 0,2977 |
| TcCLB.506855.130 | hypothetical protein, conserved                          | -0,1487 | 0,3219 |
| TcCLB.429185.31  | trans-sialidase (pseudogene), putative                   | -0,149  | 0,6747 |
| TcCLB.506435.190 | hypothetical protein, conserved                          | -0,1491 | 0,3176 |
| TcCLB.506525.50  | hypothetical protein, conserved                          | -0,1492 | 0,2198 |
| TcCLB.511661.70  | hypothetical protein, conserved                          | -0,1492 | 0,2611 |
| TcCLB.510537.40  | trans-sialidase (pseudogene), putative                   | -0,1494 | 0,7715 |
| TcCLB.510355.104 | ATP-dependent DEAD/H RNA helicase (pseudogene), puta     | -0,1495 | 0,5998 |
| TcCLB.509243.20  | hypothetical protein, conserved                          | -0,1496 | 0,537  |
| TcCLB.508501.90  | hypothetical protein                                     | -0,1496 | 0,637  |
| TcCLB.507795.50  | syntaxin, putative                                       | -0,1498 | 0,2572 |
| TcCLB.508231.180 | hypothetical protein, conserved                          | -0,1499 | 0,2082 |
| TcCLB.506295.30  | hypothetical protein, conserved                          | -0,15   | 0,3022 |
| TcCLB.508577.60  | hypothetical protein, conserved                          | -0,1501 | 0,1001 |
| TcCLB.506801.120 | protein kinase, putative                                 | -0,1502 | 0,2507 |
| TcCLB.510531.109 | dynein heavy chain, cytosolic, putative (fragment)       | -0,1502 | 0,3839 |
| TcCLB.509733.130 | hypothetical protein, conserved                          | -0,1505 | 0,1756 |
| TcCLB.511355.20  | hypothetical protein, conserved                          | -0,1505 | 0,2197 |
| TcCLB.510287.60  | ribonuclease HII, putative                               | -0,1505 | 0,2382 |
| TcCLB.503681.29  | 30S ribosomal protein S8, putative                       | -0,1507 | 0,7194 |
| TcCLB.504009.4   | hypothetical protein, conserved                          | -0,151  | 0,368  |
| TcCLB.468041.10  | hypothetical protein                                     | -0,151  | 0,4025 |
| TcCLB.511711.30  | eRF1 methyltransferase catalytic subunit, putative       | -0,1512 | 0,2696 |
| TcCLB.506679.210 | RNA editing complex protein MP61, putative               | -0,1513 | 0,1876 |
| TcCLB.507037.20  | RNA-binding protein, putative                            | -0,1513 | 0,2126 |
| TcCLB.504217.10  | coatomer subunit epsilon (COPE)                          | -0,1513 | 0,2474 |
| TcCLB.509179.170 | hypothetical protein                                     | -0,1513 | 0,2784 |
| TcCLB.511277.84  | dynein light chain Tctex-type, putative                  | -0,1515 | 0,3694 |
| TcCLB.507011.160 | hypothetical protein, conserved                          | -0,1517 | 0,1967 |
| TcCLB.510565.50  | hypothetical protein, conserved                          | -0,1518 | 0,2203 |
| TcCLB.506933.10  | hypothetical protein, conserved                          | -0,1519 | 0,2467 |
| TcCLB.510437.50  | hypothetical protein, conserved                          | -0,152  | 0,1945 |
| TcCLB.507153.55  | hypothetical protein, conserved (pseudogene)             | -0,152  | 0,3339 |
| TcCLB.509777.40  | beta galactofuranosyl glycosyltransferase, putative      | -0,152  | 0,4262 |
| TcCLB.511733.20  | hypothetical protein, conserved                          | -0,1522 | 0,1531 |
| TcCLB.509717.80  | glyceraldehyde 3-phosphate dehydrogenase, cytosolic, put | -0,1523 | 0,1865 |
| TcCLB.508469.20  | hypothetical protein, conserved                          | -0,1524 | 0,2697 |
| TcCLB.507081.90  | hypothetical protein, conserved                          | -0,1526 | 0,1623 |
| TcCLB.510421.310 | hypothetical protein, conserved                          | -0,1526 | 0,2836 |
| TcCLB.504069.40  | hypothetical protein, conserved                          | -0,1528 | 0,168  |
| TcCLB.509627.30  | proteasome regulatory non-ATPase subunit 11, putative (I | -0,1529 | 0,1137 |
| TcCLB.508175.230 | hypothetical protein, conserved                          | -0,1529 | 0,1528 |
| TcCLB.511261.10  | hypothetical protein, conserved                          | -0,153  | 0,074  |
| TcCLB.510303.204 | hypothetical protein, conserved                          | -0,153  | 0,1249 |
| TcCLB.504425.80  | hypothetical protein, conserved                          | -0,1531 | 0,2546 |

|                  |                                                          |         |         |
|------------------|----------------------------------------------------------|---------|---------|
| TcCLB.508563.30  | retrotransposon hot spot protein (RHS, pseudogene), puta | -0,1532 | 0,7069  |
| TcCLB.507629.10  | hypothetical protein, conserved                          | -0,1534 | 0,06438 |
| TcCLB.510187.234 | tyrosine specific protein phosphatase, putative          | -0,1534 | 0,1935  |
| TcCLB.504157.30  | hypothetical protein, conserved                          | -0,1534 | 0,3296  |
| TcCLB.508221.941 | surface protease GP63 (pseudogene), putative             | -0,1534 | 0,6466  |
| TcCLB.509569.180 | hypothetical protein, conserved                          | -0,1535 | 0,2307  |
| TcCLB.506251.20  | hypothetical protein, conserved                          | -0,1535 | 0,329   |
| TcCLB.510119.70  | protein kinase, putative                                 | -0,1536 | 0,3607  |
| TcCLB.508541.230 | casein kinase, putative                                  | -0,1536 | 0,5284  |
| TcCLB.506165.10  | hypothetical protein, conserved                          | -0,1537 | 0,1697  |
| TcCLB.504827.150 | hypothetical protein, conserved                          | -0,1537 | 0,3301  |
| TcCLB.510101.160 | hypothetical protein, conserved                          | -0,1538 | 0,2536  |
| TcCLB.507639.90  | hypothetical protein, conserved                          | -0,1538 | 0,4799  |
| TcCLB.511525.11  | hypothetical protein, conserved (fragment)               | -0,1538 | 0,5667  |
| TcCLB.508441.10  | NUP-1 protein, putative                                  | -0,1539 | 0,01591 |
| TcCLB.509779.30  | hypothetical protein, conserved                          | -0,1539 | 0,1827  |
| TcCLB.509563.20  | hypothetical protein, conserved                          | -0,1539 | 0,2229  |
| TcCLB.507681.130 | hypothetical protein, conserved                          | -0,1541 | 0,08464 |
| TcCLB.508547.60  | hypothetical protein, conserved                          | -0,1541 | 0,2356  |
| TcCLB.506575.30  | hypothetical protein, conserved (pseudogene)             | -0,1542 | 0,1203  |
| TcCLB.504741.70  | hypothetical protein, conserved                          | -0,1542 | 0,2027  |
| TcCLB.508277.90  | hypothetical protein, conserved                          | -0,1542 | 0,315   |
| TcCLB.506801.70  | hypothetical protein                                     | -0,1543 | 0,1705  |
| TcCLB.506885.390 | AMP deaminase, putative                                  | -0,1543 | 0,1939  |
| TcCLB.508961.4   | ADP-ribosylation factor, putative                        | -0,1543 | 0,3433  |
| TcCLB.503641.19  | peroxin 12, putative (PEX12)                             | -0,1543 | 0,4151  |
| TcCLB.509595.40  | hypothetical protein, conserved                          | -0,1544 | 0,1495  |
| TcCLB.510057.30  | hypothetical protein, conserved                          | -0,1544 | 0,2273  |
| TcCLB.511755.80  | formin, putative                                         | -0,1544 | 0,362   |
| TcCLB.506481.39  | hypothetical protein, conserved                          | -0,1545 | 0,07534 |
| TcCLB.506443.110 | retrotransposon hot spot protein (RHS, pseudogene), puta | -0,1545 | 0,2333  |
| TcCLB.457339.10  | U6 snRNA-associated Sm-like protein LSm4, putative       | -0,1545 | 0,392   |
| TcCLB.503861.110 | retrotransposon hot spot protein (RHS, pseudogene), puta | -0,1546 | 0,2311  |
| TcCLB.509099.100 | hypothetical protein, conserved                          | -0,1548 | 0,2588  |
| TcCLB.506011.20  | hypothetical protein, conserved (pseudogene)             | -0,1548 | 0,4078  |
| TcCLB.505425.9   | dispersed gene family protein 1 (DGF-1, pseudogene), put | -0,1548 | 0,7675  |
| TcCLB.510225.10  | histone H1, putative                                     | -0,1549 | 0,0591  |
| TcCLB.510175.160 | protein kinase, putative                                 | -0,1549 | 0,3937  |
| TcCLB.511541.9   | hypothetical protein, conserved (fragment)               | -0,155  | 0,1509  |
| TcCLB.506479.90  | hypothetical protein, conserved                          | -0,1552 | 0,1946  |
| TcCLB.511589.80  | hypothetical protein, conserved                          | -0,1554 | 0,228   |
| TcCLB.503425.5   | mitochondrial carrier protein, putative                  | -0,1554 | 0,5173  |
| TcCLB.504827.140 | hypothetical protein, conserved                          | -0,1555 | 0,1985  |
| TcCLB.506627.60  | ADP-ribosylation factor, putative                        | -0,1555 | 0,239   |
| TcCLB.506067.80  | mucin TcMUCII, putative                                  | -0,1555 | 0,7224  |

|                  |                                                          |         |         |
|------------------|----------------------------------------------------------|---------|---------|
| TcCLB.509213.30  | hypothetical protein, conserved                          | -0,1556 | 0,2753  |
| TcCLB.510575.10  | hypothetical protein                                     | -0,1557 | 0,249   |
| TcCLB.510361.90  | surface protease GP63, putative                          | -0,1557 | 0,6109  |
| TcCLB.511517.164 | hypothetical protein, conserved                          | -0,1558 | 0,2306  |
| TcCLB.509643.50  | hypothetical protein, conserved                          | -0,1559 | 0,1753  |
| TcCLB.508133.19  | hypothetical protein, conserved                          | -0,1561 | 0,2767  |
| TcCLB.510131.99  | hypothetical protein, conserved                          | -0,1562 | 0,2681  |
| TcCLB.509669.50  | hypothetical protein, conserved                          | -0,1563 | 0,08619 |
| TcCLB.419469.14  | kinesin, putative                                        | -0,1564 | 0,5561  |
| TcCLB.506691.30  | hypothetical protein, conserved                          | -0,1565 | 0,04716 |
| TcCLB.510143.70  | hypothetical protein, conserved                          | -0,1565 | 0,06054 |
| TcCLB.404843.10  | hypothetical protein, conserved                          | -0,1565 | 0,2073  |
| TcCLB.437999.9   | hypothetical protein, conserved (fragment)               | -0,1565 | 0,2572  |
| TcCLB.506405.20  | hypothetical protein, conserved                          | -0,1565 | 0,381   |
| TcCLB.510745.40  | protein kinase, putative                                 | -0,1566 | 0,1529  |
| TcCLB.511507.100 | hypothetical protein, conserved                          | -0,1567 | 0,296   |
| TcCLB.509439.10  | retrotransposon hot spot protein (RHS, pseudogene), puta | -0,1568 | 0,4975  |
| TcCLB.506885.413 | glyceraldehyde-3-phosphate dehydrogenase, putative       | -0,1569 | 0,1651  |
| TcCLB.506359.90  | hypothetical protein, conserved                          | -0,1569 | 0,1754  |
| TcCLB.507019.100 | nuclear movement protein, putative                       | -0,1569 | 0,1811  |
| TcCLB.508721.10  | small GTPase, putative                                   | -0,1569 | 0,2059  |
| TcCLB.508839.30  | trafficking protein particle complex subunit 3, putative | -0,1569 | 0,4789  |
| TcCLB.507093.150 | hypothetical protein, conserved (pseudogene)             | -0,157  | 0,09695 |
| TcCLB.505037.60  | NIMA/Nek Serine/threonine-protein kinase family, putati  | -0,157  | 0,176   |
| TcCLB.510329.370 | hypothetical protein, conserved                          | -0,157  | 0,2732  |
| TcCLB.508479.80  | retrotransposon hot spot (RHS) protein, putative         | -0,157  | 0,2927  |
| TcCLB.435519.19  | hypothetical protein, conserved (fragment)               | -0,157  | 0,4678  |
| TcCLB.511491.140 | hypothetical protein, conserved                          | -0,1571 | 0,1254  |
| TcCLB.506753.30  | hypothetical protein                                     | -0,1571 | 0,2845  |
| TcCLB.504949.39  | DNA repair protein Rad9, putative (fragment) (Rad9)      | -0,1572 | 0,2071  |
| TcCLB.509253.20  | tubulin tyrosine ligase, putative                        | -0,1576 | 0,2474  |
| TcCLB.478071.10  | trans-sialidase (pseudogene), putative                   | -0,1576 | 0,3043  |
| TcCLB.509805.110 | hypothetical protein, conserved                          | -0,1577 | 0,0994  |
| TcCLB.510317.20  | hypothetical protein, conserved                          | -0,1578 | 0,1095  |
| TcCLB.505683.5   | hypothetical protein                                     | -0,1578 | 0,1706  |
| TcCLB.508207.74  | Adenine phosphoribosyltransferase, putative              | -0,1578 | 0,2459  |
| TcCLB.503851.32  | trans-sialidase (pseudogene), putative                   | -0,1578 | 0,4411  |
| TcCLB.510519.149 | hypothetical protein, conserved                          | -0,1579 | 0,1126  |
| TcCLB.508719.20  | hypothetical protein, conserved                          | -0,158  | 0,3557  |
| TcCLB.430281.20  | hypothetical protein (fragment)                          | -0,158  | 0,6908  |
| TcCLB.506999.160 | hypothetical protein                                     | -0,1581 | 0,4211  |
| TcCLB.506559.100 | multidrug resistance-associated protein, putative        | -0,1582 | 0,113   |
| TcCLB.509611.89  | hypothetical protein, conserved                          | -0,159  | 0,4319  |
| TcCLB.509589.50  | hypothetical protein, conserved                          | -0,1591 | 0,1092  |
| TcCLB.511903.280 | hypothetical protein, conserved                          | -0,1591 | 0,225   |

|                  |                                                          |         |         |
|------------------|----------------------------------------------------------|---------|---------|
| TcCLB.507623.20  | hypothetical protein, conserved                          | -0,1592 | 0,1213  |
| TcCLB.506009.50  | hypothetical protein, conserved                          | -0,1595 | 0,1198  |
| TcCLB.509001.10  | hypothetical protein, conserved                          | -0,1595 | 0,1745  |
| TcCLB.509901.110 | hypothetical protein, conserved                          | -0,1595 | 0,2659  |
| TcCLB.507541.50  | casein kinase, putative (fragment)                       | -0,1597 | 0,1012  |
| TcCLB.510285.90  | hypothetical protein, conserved                          | -0,1597 | 0,1684  |
| TcCLB.508441.40  | hypothetical protein, conserved                          | -0,1599 | 0,139   |
| TcCLB.511707.20  | hypothetical protein                                     | -0,1599 | 0,2664  |
| TcCLB.506335.15  | hypothetical protein                                     | -0,1601 | 0,5828  |
| TcCLB.503899.80  | hypothetical protein, conserved                          | -0,1602 | 0,172   |
| TcCLB.504215.20  | dolichyl-P-Man:GDP-ManGlcNAc2-PP-dolichyl beta-1,4-m     | -0,1602 | 0,2051  |
| TcCLB.511267.20  | hypothetical protein, conserved                          | -0,1602 | 0,3902  |
| TcCLB.503751.30  | hypothetical protein, conserved (pseudogene)             | -0,1603 | 0,1594  |
| TcCLB.503747.20  | hypothetical protein                                     | -0,1604 | 0,4236  |
| TcCLB.508799.140 | transcription modulator/accessory protein, putative      | -0,1605 | 0,09739 |
| TcCLB.511109.90  | DnaJ chaperone protein, putative                         | -0,1607 | 0,2352  |
| TcCLB.507787.70  | hypothetical protein, conserved                          | -0,1607 | 0,2796  |
| TcCLB.511189.90  | hypothetical protein, conserved                          | -0,161  | 0,09512 |
| TcCLB.510031.40  | hypothetical protein                                     | -0,161  | 0,2855  |
| TcCLB.508467.10  | hypothetical protein, conserved                          | -0,1612 | 0,4357  |
| TcCLB.504175.30  | hypothetical protein, conserved                          | -0,1613 | 0,2432  |
| TcCLB.510089.80  | protein kinase, putative                                 | -0,1615 | 0,1649  |
| TcCLB.506369.30  | hypothetical protein, conserved                          | -0,1615 | 0,2879  |
| TcCLB.509345.20  | trans-sialidase (pseudogene), putative                   | -0,1616 | 0,5189  |
| TcCLB.508153.410 | hypothetical protein, conserved                          | -0,1617 | 0,1569  |
| TcCLB.506739.190 | serine/threonine protein kinase, putative                | -0,1619 | 0,1598  |
| TcCLB.506201.100 | hypothetical protein, conserved                          | -0,1621 | 0,1705  |
| TcCLB.507093.50  | hypothetical protein, conserved                          | -0,1624 | 0,06137 |
| TcCLB.511111.40  | hypothetical protein, conserved                          | -0,1625 | 0,2144  |
| TcCLB.504137.90  | hypothetical protein, conserved                          | -0,1626 | 0,1333  |
| TcCLB.511153.64  | histone H2B variant, putative                            | -0,1627 | 0,1035  |
| TcCLB.510181.50  | nucleoporin interacting component (NUP93), putative      | -0,163  | 0,1758  |
| TcCLB.509817.40  | trans-sialidase (pseudogene), putative                   | -0,163  | 0,3292  |
| TcCLB.508707.300 | hypothetical protein, conserved                          | -0,1631 | 0,04987 |
| TcCLB.508175.70  | lanosterol synthase, putative                            | -0,1631 | 0,1132  |
| TcCLB.511109.40  | hypothetical protein, conserved                          | -0,1631 | 0,14    |
| TcCLB.510251.10  | amino acid permease-like protein, putative               | -0,1632 | 0,1074  |
| TcCLB.506007.10  | MP24, putative                                           | -0,1632 | 0,3451  |
| TcCLB.508163.390 | hypothetical protein, conserved                          | -0,1632 | 0,4767  |
| TcCLB.506035.10  | retrotransposon hot spot protein (RHS, pseudogene), puta | -0,1633 | 0,1699  |
| TcCLB.507515.110 | hypothetical protein, conserved                          | -0,1633 | 0,1759  |
| TcCLB.422031.10  | solanesyl-diphosphate synthase, putative                 | -0,1633 | 0,2048  |
| TcCLB.511517.99  | hypothetical protein, conserved                          | -0,1633 | 0,2839  |
| TcCLB.510659.10  | hypothetical protein, conserved                          | -0,1634 | 0,1169  |
| TcCLB.508817.90  | hypothetical protein, conserved (pseudogene)             | -0,1635 | 0,1799  |

|                  |                                                              |         |         |
|------------------|--------------------------------------------------------------|---------|---------|
| TcCLB.511087.4   | mucin TcMUCII (pseudogene), putative                         | -0,1635 | 0,6106  |
| TcCLB.507633.120 | mucin TcMUCII, putative                                      | -0,1635 | 0,681   |
| TcCLB.509793.69  | hypothetical protein, conserved                              | -0,1636 | 0,08401 |
| TcCLB.506945.260 | hypothetical protein, conserved                              | -0,1637 | 0,05465 |
| TcCLB.508965.39  | hypothetical protein, conserved                              | -0,1637 | 0,1     |
| TcCLB.510339.54  | hypothetical protein, conserved                              | -0,1638 | 0,1085  |
| TcCLB.509243.60  | ATP-dependent DEAD/H DNA helicase recQ, putative             | -0,1638 | 0,4983  |
| TcCLB.508879.150 | hypothetical protein, conserved                              | -0,1639 | 0,2758  |
| TcCLB.510513.30  | Probable methyltransferase BTM2 homolog                      | -0,164  | 0,251   |
| TcCLB.507209.30  | hypothetical protein, conserved                              | -0,1642 | 0,07743 |
| TcCLB.506801.129 | hypothetical protein (fragment)                              | -0,1642 | 0,1229  |
| TcCLB.509715.20  | clathrin coat assembly protein, putative                     | -0,1642 | 0,2101  |
| TcCLB.506605.90  | hypothetical protein, conserved                              | -0,1642 | 0,2316  |
| TcCLB.511389.100 | hypothetical protein, conserved                              | -0,1642 | 0,2381  |
| TcCLB.508577.120 | hypothetical protein, conserved                              | -0,1643 | 0,2574  |
| TcCLB.503823.90  | hypothetical protein, conserved                              | -0,1645 | 0,1196  |
| TcCLB.508707.220 | hypothetical protein                                         | -0,1645 | 0,1876  |
| TcCLB.507099.130 | hypothetical protein, conserved                              | -0,1645 | 0,213   |
| TcCLB.510065.50  | hypothetical protein, conserved                              | -0,1645 | 0,275   |
| TcCLB.506883.100 | GTP-binding protein, putative                                | -0,1646 | 0,1085  |
| TcCLB.507669.110 | hypothetical protein, conserved                              | -0,1649 | 0,0656  |
| TcCLB.509429.90  | translation initiation factor EIF-2b alpha subunit, putative | -0,1649 | 0,2232  |
| TcCLB.507611.230 | trans-sialidase (pseudogene), putative                       | -0,165  | 0,3094  |
| TcCLB.507711.349 | hypothetical protein, conserved                              | -0,165  | 0,397   |
| TcCLB.511001.90  | hypothetical protein, conserved                              | -0,1652 | 0,02258 |
| TcCLB.506989.120 | hypothetical protein, conserved                              | -0,1652 | 0,2101  |
| TcCLB.506779.10  | dynein regulatory complex subunit, putative                  | -0,1652 | 0,2574  |
| TcCLB.508233.10  | hypothetical protein, conserved                              | -0,1654 | 0,2518  |
| TcCLB.505989.74  | peroxisome biogenesis factor 1, putative                     | -0,1655 | 0,09325 |
| TcCLB.506695.40  | hypothetical protein, conserved                              | -0,1655 | 0,2562  |
| TcCLB.510155.40  | DNA-damage inducible protein DDI1-like protein, putative     | -0,1656 | 0,08771 |
| TcCLB.507037.10  | proteasome regulatory non-ATPase subunit 7 (pseudogen)       | -0,1656 | 0,1318  |
| TcCLB.511281.53  | hypothetical protein                                         | -0,1656 | 0,6326  |
| TcCLB.509237.20  | hypothetical protein, conserved                              | -0,1658 | 0,05608 |
| TcCLB.504119.4   | DNA-directed RNA polymerase III subunit C1, putative (fra    | -0,1658 | 0,4283  |
| TcCLB.508505.10  | hypothetical protein, conserved                              | -0,1659 | 0,1291  |
| TcCLB.508465.20  | hypothetical protein, conserved                              | -0,1659 | 0,1727  |
| TcCLB.510667.50  | hypothetical protein, conserved                              | -0,1659 | 0,1883  |
| TcCLB.511711.10  | hypothetical protein, conserved                              | -0,166  | 0,17    |
| TcCLB.511421.230 | Cell cycle checkpoint protein RAD1-like, putative            | -0,1661 | 0,1415  |
| TcCLB.510329.310 | hypothetical protein, conserved                              | -0,1661 | 0,1616  |
| TcCLB.506355.160 | hypothetical protein, conserved                              | -0,1661 | 0,1859  |
| TcCLB.506211.220 | Associated kinase of Tb14-3-3, putative (AKB1)               | -0,1662 | 0,0602  |
| TcCLB.510443.40  | hypothetical protein, conserved                              | -0,1663 | 0,1303  |
| TcCLB.511925.10  | hypothetical protein, conserved                              | -0,1664 | 0,1536  |

|                  |                                                          |         |         |
|------------------|----------------------------------------------------------|---------|---------|
| TcCLB.508661.30  | DnaJ chaperone protein, putative                         | -0,1666 | 0,06847 |
| TcCLB.507011.80  | zinc finger protein, putative                            | -0,1667 | 0,1696  |
| TcCLB.506405.30  | actin-like protein, putative                             | -0,1667 | 0,2203  |
| TcCLB.510483.90  | trans-sialidase (pseudogene), putative                   | -0,1667 | 0,5516  |
| TcCLB.509735.30  | retrotransposon hot spot protein (RHS, pseudogene), puta | -0,1668 | 0,1319  |
| TcCLB.507129.10  | actin 2, putative                                        | -0,1668 | 0,3239  |
| TcCLB.510297.100 | ADP-ribosylation factor-like protein, putative           | -0,1671 | 0,1504  |
| TcCLB.504867.10  | hypothetical protein, conserved                          | -0,1671 | 0,2011  |
| TcCLB.506811.30  | hypothetical protein, conserved                          | -0,1672 | 0,1185  |
| TcCLB.511393.60  | protein kinase, putative                                 | -0,1673 | 0,06974 |
| TcCLB.511589.170 | oxidoreductase, putative                                 | -0,1673 | 0,2715  |
| TcCLB.507009.120 | DNA repair protein RAD2, putative                        | -0,1674 | 0,1454  |
| TcCLB.505169.10  | polyubiquitin (pseudogene), putative                     | -0,1674 | 0,2673  |
| TcCLB.509471.95  | histone H3, putative                                     | -0,1675 | 0,2336  |
| TcCLB.510407.100 | hypothetical protein, conserved                          | -0,1676 | 0,1486  |
| TcCLB.503487.10  | DNA-directed RNA polymerase, mitochondrial (fragment)    | -0,1676 | 0,3216  |
| TcCLB.510325.60  | hypothetical protein, conserved                          | -0,1677 | 0,1424  |
| TcCLB.508277.310 | hypothetical protein                                     | -0,1677 | 0,2393  |
| TcCLB.508891.4   | hypothetical protein, conserved                          | -0,1677 | 0,2551  |
| TcCLB.506925.350 | hypothetical protein, conserved                          | -0,1678 | 0,07211 |
| TcCLB.511621.110 | hypothetical protein                                     | -0,1678 | 0,1309  |
| TcCLB.508559.40  | retrotransposon hot spot protein (RHS, pseudogene), puta | -0,1678 | 0,2647  |
| TcCLB.511075.24  | zinc-finger multi-pass transmembrane protein, putative   | -0,1679 | 0,1499  |
| TcCLB.507913.10  | hypothetical protein, conserved                          | -0,168  | 0,4273  |
| TcCLB.506795.50  | poly(A) polymerase, putative                             | -0,1681 | 0,07771 |
| TcCLB.511733.120 | hypothetical protein, conserved                          | -0,1681 | 0,08846 |
| TcCLB.510601.30  | hypothetical protein, conserved                          | -0,1681 | 0,1383  |
| TcCLB.508257.170 | dynein heavy chain, putative                             | -0,1681 | 0,1809  |
| TcCLB.503809.24  | hypothetical protein, conserved                          | -0,1681 | 0,318   |
| TcCLB.509065.60  | glyceraldehyde 3-phosphate dehydrogenase, putative       | -0,1682 | 0,04902 |
| TcCLB.510515.100 | coronin, putative (CRN12)                                | -0,1682 | 0,07755 |
| TcCLB.506041.40  | hypothetical protein, conserved                          | -0,1682 | 0,1341  |
| TcCLB.508139.170 | retrotransposon hot spot protein (RHS, pseudogene), puta | -0,1687 | 0,1525  |
| TcCLB.508385.30  | CYC2-like cyclin, putative                               | -0,1688 | 0,06751 |
| TcCLB.509911.124 | hypothetical protein, conserved                          | -0,1688 | 0,2292  |
| TcCLB.506295.80  | ADP-ribosylation factor-like 2, arl2, putative (ARL2)    | -0,1688 | 0,5066  |
| TcCLB.511261.60  | hypothetical protein, conserved                          | -0,1689 | 0,06251 |
| TcCLB.507603.60  | hypothetical protein, conserved                          | -0,1689 | 0,1707  |
| TcCLB.506025.20  | hypothetical protein, conserved                          | -0,1689 | 0,1788  |
| TcCLB.505807.254 | hypothetical protein                                     | -0,169  | 0,3539  |
| TcCLB.506133.10  | syntaxin binding protein (pseudogene), putative          | -0,169  | 0,6552  |
| TcCLB.506859.90  | prefoldin, putative                                      | -0,1691 | 0,1377  |
| TcCLB.510283.40  | phosphoglycerate mutase family member 5, putative        | -0,1691 | 0,306   |
| TcCLB.508541.200 | hypothetical protein, conserved                          | -0,1693 | 0,2902  |
| TcCLB.506193.5   | glucose-6-phosphate 1-dehydrogenase (pseudogene), puti   | -0,1693 | 0,4571  |

|                  |                                                              |         |         |
|------------------|--------------------------------------------------------------|---------|---------|
| TcCLB.511285.10  | hypothetical protein                                         | -0,1694 | 0,06696 |
| TcCLB.511319.20  | hypothetical protein, conserved                              | -0,1694 | 0,06754 |
| TcCLB.509599.90  | hypothetical protein, conserved                              | -0,1694 | 0,1223  |
| TcCLB.507623.110 | surface protease GP63, putative                              | -0,1694 | 0,1276  |
| TcCLB.511287.10  | hypothetical protein, conserved                              | -0,1694 | 0,1909  |
| TcCLB.510943.170 | hypothetical protein, conserved                              | -0,1696 | 0,1448  |
| TcCLB.412435.10  | hypothetical protein, conserved                              | -0,1697 | 0,2441  |
| TcCLB.509967.60  | hypothetical protein, conserved                              | -0,1697 | 0,2487  |
| TcCLB.511903.134 | hypothetical protein, conserved                              | -0,1697 | 0,2874  |
| TcCLB.506359.10  | hypothetical protein, conserved                              | -0,1697 | 0,3027  |
| TcCLB.507005.40  | zinc finger protein, putative                                | -0,1698 | 0,219   |
| TcCLB.504049.30  | trans-sialidase (pseudogene), putative                       | -0,1699 | 0,5647  |
| TcCLB.506227.250 | hypothetical protein, conserved                              | -0,17   | 0,1203  |
| TcCLB.508027.80  | hypothetical protein, conserved                              | -0,1701 | 0,08873 |
| TcCLB.506463.10  | Lys-63-specific deubiquitinase BRCC36, putative              | -0,1701 | 0,1975  |
| TcCLB.507649.100 | hypothetical protein, conserved                              | -0,1702 | 0,08369 |
| TcCLB.508397.20  | hypothetical protein, conserved                              | -0,1702 | 0,2877  |
| TcCLB.506835.40  | hypothetical protein, conserved                              | -0,1703 | 0,1479  |
| TcCLB.510657.10  | Flagellar Member 5 (fragment) (FLAM5)                        | -0,1703 | 0,2455  |
| TcCLB.511511.20  | tRNA modification enzyme, putative                           | -0,1703 | 0,3129  |
| TcCLB.509979.100 | hypothetical protein, conserved                              | -0,1704 | 0,2723  |
| TcCLB.506177.50  | hypothetical protein, conserved                              | -0,1705 | 0,04618 |
| TcCLB.503939.100 | hypothetical protein, conserved                              | -0,1706 | 0,06117 |
| TcCLB.508153.550 | hypothetical protein, conserved                              | -0,1706 | 0,1074  |
| TcCLB.507897.4   | inositol polyphosphate 1-phosphatase, putative               | -0,1706 | 0,1517  |
| TcCLB.503697.110 | hypothetical protein, conserved                              | -0,1707 | 0,1747  |
| TcCLB.504899.20  | retrotransposon hot spot protein (RHS, pseudogene), puta     | -0,1707 | 0,193   |
| TcCLB.506127.110 | eukaryotic peptide chain release factor subunit 1, putative  | -0,1708 | 0,07751 |
| TcCLB.507547.70  | hypothetical protein, conserved                              | -0,1709 | 0,08229 |
| TcCLB.503823.110 | hypothetical protein, conserved                              | -0,1709 | 0,2304  |
| TcCLB.509195.10  | hypothetical protein                                         | -0,1709 | 0,6293  |
| TcCLB.508723.24  | hypothetical protein, conserved                              | -0,171  | 0,1673  |
| TcCLB.510173.80  | hypothetical protein                                         | -0,1712 | 0,2335  |
| TcCLB.507093.63  | RNA-binding protein, putative                                | -0,1713 | 0,1925  |
| TcCLB.509537.20  | hypothetical protein, conserved                              | -0,1715 | 0,1338  |
| TcCLB.503885.90  | hypothetical protein, conserved                              | -0,1716 | 0,101   |
| TcCLB.508895.89  | intraflagellar transport protein 80, putative (fragment) (IF | -0,1717 | 0,1887  |
| TcCLB.506227.140 | hypothetical protein, conserved                              | -0,1717 | 0,2681  |
| TcCLB.511075.30  | TFIIH basal transcription factor complex helicase subunit,   | -0,1718 | 0,02402 |
| TcCLB.508899.30  | hypothetical protein, conserved                              | -0,1718 | 0,2099  |
| TcCLB.504009.40  | Axonemal inner arm dynein light chain, putative              | -0,1719 | 0,1885  |
| TcCLB.509837.40  | histone H1, putative                                         | -0,1721 | 0,3359  |
| TcCLB.511109.110 | hypothetical protein, conserved                              | -0,1721 | 0,3516  |
| TcCLB.509053.50  | hypothetical protein, conserved                              | -0,1722 | 0,4436  |
| TcCLB.508387.70  | hypothetical protein, conserved                              | -0,1723 | 0,03468 |



|                  |                                                             |         |         |
|------------------|-------------------------------------------------------------|---------|---------|
| TcCLB.511275.40  | hypothetical protein, conserved                             | -0,1724 | 0,2656  |
| TcCLB.507681.240 | hypothetical protein, conserved                             | -0,1725 | 0,1007  |
| TcCLB.511851.20  | retrotransposon hot spot protein (RHS, pseudogene), puta    | -0,1726 | 0,3491  |
| TcCLB.511587.111 | N-acetyltransferase complex ARD1 subunit (pseudogene),      | -0,1726 | 0,5064  |
| TcCLB.510073.70  | CCR4-NOT transcription complex subunit 2, putative          | -0,1727 | 0,08047 |
| TcCLB.510007.20  | hypothetical protein, conserved                             | -0,1727 | 0,1403  |
| TcCLB.506891.30  | leucine-rich repeat-containing protein                      | -0,1727 | 0,2572  |
| TcCLB.510817.10  | protein kinase, putative                                    | -0,1727 | 0,5232  |
| TcCLB.508873.40  | mucin TcMUCII (pseudogene), putative                        | -0,1727 | 0,5458  |
| TcCLB.507257.70  | protein farnesyltransferase alpha subunit, putative         | -0,1728 | 0,09225 |
| TcCLB.511071.20  | hypothetical protein, conserved                             | -0,1729 | 0,254   |
| TcCLB.507681.90  | hypothetical protein, conserved                             | -0,173  | 0,1043  |
| TcCLB.508973.60  | hypothetical protein, conserved                             | -0,1731 | 0,1254  |
| TcCLB.511717.180 | hypothetical protein, conserved                             | -0,1731 | 0,1487  |
| TcCLB.504643.49  | hypothetical protein, conserved (fragment)                  | -0,1733 | 0,05709 |
| TcCLB.511001.80  | hypothetical protein, conserved                             | -0,1733 | 0,08211 |
| TcCLB.508737.140 | hypothetical protein, conserved                             | -0,1733 | 0,08901 |
| TcCLB.510665.20  | hypothetical protein, conserved                             | -0,1734 | 0,1055  |
| TcCLB.507709.30  | hypothetical protein, conserved                             | -0,1734 | 0,2743  |
| TcCLB.506475.120 | conserved protein, unknown function                         | -0,1735 | 0,1211  |
| TcCLB.511203.20  | surface protease GP63, putative                             | -0,1735 | 0,3164  |
| TcCLB.511261.90  | hypothetical protein, conserved                             | -0,1737 | 0,1443  |
| TcCLB.503717.90  | surface protease GP63, putative                             | -0,1737 | 0,6675  |
| TcCLB.511755.50  | hypothetical protein, conserved                             | -0,1738 | 0,1422  |
| TcCLB.508001.60  | trans-sialidase (pseudogene), putative                      | -0,1738 | 0,4472  |
| TcCLB.506629.110 | hypothetical protein, conserved                             | -0,1739 | 0,1337  |
| TcCLB.510901.150 | proteasome regulatory non-ATPase subunit 2, putative        | -0,174  | 0,03755 |
| TcCLB.503643.6   | hypothetical protein, conserved                             | -0,174  | 0,1411  |
| TcCLB.511589.74  | hypothetical protein                                        | -0,174  | 0,1597  |
| TcCLB.507009.80  | hypothetical protein, conserved                             | -0,174  | 0,259   |
| TcCLB.505555.30  | hypothetical protein, conserved                             | -0,1741 | 0,03485 |
| TcCLB.511423.80  | Transmembrane protein 231, putative                         | -0,1741 | 0,0851  |
| TcCLB.478711.10  | trans-sialidase (pseudogene), putative                      | -0,1741 | 0,1564  |
| TcCLB.509381.10  | mitochondrial import receptor subunit, putative             | -0,1742 | 0,09733 |
| TcCLB.503655.40  | surface protease GP63 (pseudogene), putative                | -0,1742 | 0,4546  |
| TcCLB.504089.54  | protein kinase, putative                                    | -0,1743 | 0,0864  |
| TcCLB.507809.170 | protein kinase, putative                                    | -0,1743 | 0,5143  |
| TcCLB.504157.100 | hypothetical protein, conserved                             | -0,1745 | 0,1231  |
| TcCLB.508163.81  | hypothetical protein, conserved (pseudogene)                | -0,1745 | 0,6655  |
| TcCLB.508153.150 | hypothetical protein, conserved                             | -0,1746 | 0,1313  |
| TcCLB.508209.120 | 10 kDa heat shock protein, putative                         | -0,1747 | 0,5816  |
| TcCLB.511487.71  | hypothetical protein                                        | -0,1748 | 0,1734  |
| TcCLB.506479.10  | hypothetical protein, conserved                             | -0,1748 | 0,2107  |
| TcCLB.504827.170 | kinetoplastid kinetochore protein 2, putative (fragment) (l | -0,1749 | 0,2137  |
| TcCLB.425597.5   | hypothetical protein, conserved (pseudogene)                | -0,1749 | 0,4055  |

|                  |                                                           |         |         |
|------------------|-----------------------------------------------------------|---------|---------|
| TcCLB.510387.30  | surface protease GP63 (pseudogene), putative              | -0,175  | 0,6258  |
| TcCLB.510621.60  | mucin-associated surface protein (MASP), putative         | -0,1751 | 0,6025  |
| TcCLB.508465.70  | hypothetical protein, conserved                           | -0,1752 | 0,1452  |
| TcCLB.510421.29  | CAAX prenyl protease 2, putative                          | -0,1752 | 0,2236  |
| TcCLB.507063.180 | hypothetical protein, conserved                           | -0,1752 | 0,2825  |
| TcCLB.510431.290 | hypothetical protein                                      | -0,1752 | 0,3516  |
| TcCLB.506865.20  | hypothetical protein                                      | -0,1753 | 0,1521  |
| TcCLB.506973.30  | mucin-associated surface protein (MASP), putative         | -0,1753 | 0,4884  |
| TcCLB.503835.5   | rac serine threonine protein kinase, putative             | -0,1754 | 0,5187  |
| TcCLB.510737.79  | 60S ribosomal subunit protein L31, putative               | -0,1754 | 0,6013  |
| TcCLB.506503.100 | U3 snoRNA-associated protein UTP11, putative              | -0,1755 | 0,1915  |
| TcCLB.509693.190 | ABC transporter, putative                                 | -0,1755 | 0,1987  |
| TcCLB.508643.30  | DnaJ chaperone protein, putative                          | -0,1755 | 0,2653  |
| TcCLB.506445.100 | E2-like ubiquitin-conjugation enzyme, putative (UFC1)     | -0,1757 | 0,03874 |
| TcCLB.507053.70  | geranylgeranyl transferase type II beta subunit, putative | -0,1759 | 0,1202  |
| TcCLB.508207.170 | hypothetical protein                                      | -0,1761 | 0,09666 |
| TcCLB.508207.260 | hypothetical protein, conserved                           | -0,1761 | 0,1806  |
| TcCLB.508693.40  | hypothetical protein, conserved                           | -0,1762 | 0,0614  |
| TcCLB.508779.30  | synaptobrevin, putative                                   | -0,1763 | 0,09706 |
| TcCLB.511213.50  | mucin TcMUCII, putative                                   | -0,1765 | 0,3516  |
| TcCLB.509533.10  | trans-sialidase, Group II, putative                       | -0,1766 | 0,3172  |
| TcCLB.509959.40  | beta galactofuranosyl glycosyltransferase, putative       | -0,1766 | 0,6818  |
| TcCLB.508173.47  | autophagy-related protein 8 (ATG8)                        | -0,1769 | 0,1382  |
| TcCLB.505807.40  | hypothetical protein, conserved                           | -0,177  | 0,03778 |
| TcCLB.507623.125 | hypothetical protein, conserved                           | -0,177  | 0,4988  |
| TcCLB.506985.40  | Polyamine transporter 1, putative (POT1.1)                | -0,1771 | 0,1067  |
| TcCLB.506047.13  | ATP-dependent DEAD/H RNA helicase (pseudogene), puta      | -0,1772 | 0,6163  |
| TcCLB.507711.280 | hypothetical protein, conserved                           | -0,1773 | 0,2038  |
| TcCLB.507625.150 | hypothetical protein, conserved                           | -0,1773 | 0,2347  |
| TcCLB.511383.89  | Flagellar Member 3 (FLAM3)                                | -0,1774 | 0,2121  |
| TcCLB.506925.60  | hypothetical protein, conserved                           | -0,1774 | 0,2154  |
| TcCLB.511237.120 | hypothetical protein                                      | -0,1775 | 0,432   |
| TcCLB.508141.80  | hypothetical protein, conserved                           | -0,1776 | 0,05809 |
| TcCLB.510643.121 | trans-sialidase (pseudogene), putative                    | -0,1776 | 0,3422  |
| TcCLB.505655.20  | hypothetical protein                                      | -0,1776 | 0,5747  |
| TcCLB.506755.160 | AAA ATPase, putative                                      | -0,1777 | 0,01698 |
| TcCLB.508461.230 | kinetoplastid kinetochore protein 3, putative (kkt3)      | -0,1778 | 0,1252  |
| TcCLB.508231.200 | 40S ribosomal protein S8, putative                        | -0,1779 | 0,1157  |
| TcCLB.510031.30  | hypothetical protein                                      | -0,1781 | 0,1308  |
| TcCLB.509379.29  | hypothetical protein, conserved                           | -0,1781 | 0,3472  |
| TcCLB.509693.150 | hypothetical protein, conserved                           | -0,1782 | 0,1127  |
| TcCLB.510309.60  | hypothetical protein, conserved                           | -0,1783 | 0,1201  |
| TcCLB.507063.150 | hypothetical protein, conserved                           | -0,1783 | 0,1619  |
| TcCLB.447255.29  | multidrug resistance-associated protein, putative         | -0,1783 | 0,3447  |
| TcCLB.510659.74  | hypothetical protein, conserved                           | -0,1783 | 0,4233  |

|                  |                                                          |         |         |
|------------------|----------------------------------------------------------|---------|---------|
| TcCLB.503513.40  | proteasome regulatory non-ATPase subunit 6, putative     | -0,1785 | 0,1459  |
| TcCLB.511927.30  | hypothetical protein, conserved                          | -0,1785 | 0,3914  |
| TcCLB.504097.4   | nucleoplasmin-like protein (NLP), putative               | -0,1786 | 0,1405  |
| TcCLB.506573.60  | hypothetical protein, conserved                          | -0,1786 | 0,1467  |
| TcCLB.410923.30  | hypothetical protein                                     | -0,1786 | 0,4568  |
| TcCLB.510709.31  | syntaxin binding protein (pseudogene), putative          | -0,1786 | 0,7284  |
| TcCLB.510733.40  | hypothetical protein, conserved                          | -0,1787 | 0,1132  |
| TcCLB.505007.10  | RNA-binding protein, putative                            | -0,1787 | 0,2179  |
| TcCLB.503735.30  | hypothetical protein, conserved                          | -0,1788 | 0,1252  |
| TcCLB.509287.10  | hypothetical protein, conserved                          | -0,1788 | 0,2521  |
| TcCLB.504057.80  | Present in the outer mitochondrial membrane proteome 2   | -0,1789 | 0,06247 |
| TcCLB.506855.290 | hypothetical protein, conserved                          | -0,1789 | 0,1962  |
| TcCLB.507519.140 | Adenine phosphoribosyltransferase, putative              | -0,179  | 0,1265  |
| TcCLB.508207.250 | mitotic cyclin, putative                                 | -0,1791 | 0,205   |
| TcCLB.511753.100 | ABC transporter, putative                                | -0,1792 | 0,143   |
| TcCLB.510141.20  | hypothetical protein, conserved                          | -0,1793 | 0,1639  |
| TcCLB.506755.120 | hypothetical protein, conserved                          | -0,1795 | 0,0384  |
| TcCLB.509489.29  | proteasome regulatory non-ATP-ase subunit, putative (fra | -0,1795 | 0,2108  |
| TcCLB.408799.10  | hypothetical protein, conserved                          | -0,1796 | 0,2607  |
| TcCLB.504105.30  | DNA-directed RNA polymerase III subunit C1, putative (RP | -0,1797 | 0,00703 |
| TcCLB.506665.10  | hypothetical protein                                     | -0,1797 | 0,6868  |
| TcCLB.507669.100 | transcription elongation factor, putative                | -0,1798 | 0,09938 |
| TcCLB.507053.100 | ubiquitin hydrolase, putative                            | -0,1799 | 0,04279 |
| TcCLB.511421.150 | leucine-rich repeat-containing protein                   | -0,1799 | 0,04332 |
| TcCLB.508179.10  | DnaJ chaperone protein, putative                         | -0,1799 | 0,2948  |
| TcCLB.511173.110 | mucin TcMUCII, putative                                  | -0,1799 | 0,5365  |
| TcCLB.511709.10  | hypothetical protein, conserved                          | -0,18   | 0,1644  |
| TcCLB.508153.40  | hypothetical protein, conserved                          | -0,18   | 0,228   |
| TcCLB.508317.20  | hypothetical protein, conserved                          | -0,1801 | 0,2073  |
| TcCLB.510421.140 | hypothetical protein, conserved                          | -0,1801 | 0,2117  |
| TcCLB.509161.130 | ATP-dependent DEAD/H RNA helicase, putative              | -0,1802 | 0,03466 |
| TcCLB.507093.240 | hypothetical protein, conserved                          | -0,1802 | 0,04922 |
| TcCLB.506211.240 | hypothetical protein, conserved                          | -0,1803 | 0,0516  |
| TcCLB.507993.140 | RNA-binding protein 29, putative (RBP29)                 | -0,1803 | 0,08169 |
| TcCLB.510609.100 | hypothetical protein, conserved                          | -0,1803 | 0,1802  |
| TcCLB.503703.80  | hypothetical protein, conserved                          | -0,1806 | 0,1945  |
| TcCLB.508943.10  | hypothetical protein, conserved                          | -0,1807 | 0,2019  |
| TcCLB.507559.60  | hypothetical protein, conserved                          | -0,1808 | 0,0838  |
| TcCLB.511727.60  | hypothetical protein, conserved                          | -0,1809 | 0,03538 |
| TcCLB.510941.20  | hypothetical protein, conserved                          | -0,1809 | 0,2124  |
| TcCLB.506009.20  | hypothetical protein, conserved                          | -0,181  | 0,04042 |
| TcCLB.506943.120 | hypothetical protein, conserved                          | -0,1815 | 0,1923  |
| TcCLB.508605.40  | retrotransposon hot spot protein (RHS, pseudogene), puta | -0,1815 | 0,3083  |
| TcCLB.510091.60  | hypothetical protein, conserved                          | -0,1816 | 0,105   |
| TcCLB.401661.10  | trans-sialidase (pseudogene), putative                   | -0,1816 | 0,1175  |

|                  |                                                          |         |         |
|------------------|----------------------------------------------------------|---------|---------|
| TcCLB.510575.140 | hypothetical protein, conserved                          | -0,1817 | 0,1828  |
| TcCLB.507259.4   | hypothetical protein, conserved                          | -0,1817 | 0,2323  |
| TcCLB.508029.30  | ATP dependent DEAD-box helicase, putative (RH)           | -0,1818 | 0,03991 |
| TcCLB.511625.10  | transcription initiation protein, putative               | -0,1819 | 0,06921 |
| TcCLB.510763.70  | hypothetical protein, conserved                          | -0,1819 | 0,1313  |
| TcCLB.447483.4   | Meckel syndrome type 1 protein, putative (fragment) (mk) | -0,182  | 0,3693  |
| TcCLB.504057.60  | hypothetical protein, conserved                          | -0,1821 | 0,05986 |
| TcCLB.510645.20  | nuclear transcription factor, putative                   | -0,1821 | 0,09345 |
| TcCLB.506743.20  | hypothetical protein, conserved                          | -0,1821 | 0,3086  |
| TcCLB.510387.70  | hypothetical protein, conserved (pseudogene)             | -0,1821 | 0,3615  |
| TcCLB.507801.19  | dynein heavy chain, putative                             | -0,1822 | 0,1351  |
| TcCLB.508207.20  | protein kinase, putative                                 | -0,1823 | 0,3433  |
| TcCLB.511185.60  | trans-sialidase (pseudogene), putative                   | -0,1823 | 0,471   |
| TcCLB.511875.50  | syntaxin binding protein (pseudogene), putative          | -0,1824 | 0,1571  |
| TcCLB.509453.90  | hypothetical protein, conserved                          | -0,1826 | 0,05051 |
| TcCLB.509429.180 | hypothetical protein, conserved                          | -0,1826 | 0,06494 |
| TcCLB.507049.10  | hypothetical protein, conserved                          | -0,1826 | 0,1507  |
| TcCLB.506607.19  | phosphoribosylpyrophosphate synthetase, putative         | -0,1826 | 0,186   |
| TcCLB.511019.74  | retrotransposon hot spot (RHS) protein, putative         | -0,1827 | 0,09873 |
| TcCLB.508357.26  | hypothetical protein, conserved                          | -0,1829 | 0,1631  |
| TcCLB.506811.220 | hypothetical protein, conserved                          | -0,183  | 0,04045 |
| TcCLB.508911.60  | hypothetical protein, conserved                          | -0,1831 | 0,05443 |
| TcCLB.511545.150 | hypothetical protein, conserved                          | -0,1831 | 0,1038  |
| TcCLB.511517.44  | chaperone DNAJ protein, putative                         | -0,1834 | 0,09834 |
| TcCLB.507013.24  | poly(ADP-ribose) glycohydrolase, putative                | -0,1834 | 0,1454  |
| TcCLB.509937.50  | hypothetical protein, conserved                          | -0,1836 | 0,07438 |
| TcCLB.509967.90  | hypothetical protein, conserved                          | -0,1837 | 0,1651  |
| TcCLB.509099.130 | hypothetical protein, conserved                          | -0,1839 | 0,05776 |
| TcCLB.503423.20  | protein kinase, putative                                 | -0,184  | 0,6726  |
| TcCLB.509955.50  | hypothetical protein, conserved                          | -0,184  | 0,6901  |
| TcCLB.510255.4   | hypothetical protein, conserved                          | -0,1842 | 0,5151  |
| TcCLB.509161.80  | hypothetical protein, conserved                          | -0,1843 | 0,1394  |
| TcCLB.511257.20  | hypothetical protein, conserved                          | -0,1845 | 0,09683 |
| TcCLB.511183.49  | mucin TcMUCII (pseudogene), putative                     | -0,1847 | 0,699   |
| TcCLB.511277.450 | GPI-anchor transamidase subunit 8, putative (GPI8)       | -0,1849 | 0,1338  |
| TcCLB.506275.80  | hypothetical protein, conserved                          | -0,185  | 0,1899  |
| TcCLB.503539.20  | Putative intraflagellar transport protein A1 (PIFTA1)    | -0,1851 | 0,06818 |
| TcCLB.511131.20  | hypothetical protein, conserved                          | -0,1851 | 0,09638 |
| TcCLB.511517.50  | hypothetical protein, conserved                          | -0,1852 | 0,1283  |
| TcCLB.511003.70  | hypothetical protein, conserved                          | -0,1855 | 0,2382  |
| TcCLB.504069.110 | hypothetical protein, conserved                          | -0,1855 | 0,2607  |
| TcCLB.511497.10  | hypothetical protein, conserved                          | -0,1855 | 0,3185  |
| TcCLB.508307.90  | hypothetical protein, conserved                          | -0,1856 | 0,0558  |
| TcCLB.506637.60  | hypothetical protein, conserved                          | -0,1856 | 0,1694  |
| TcCLB.508699.90  | surface protease GP63, putative                          | -0,1856 | 0,2585  |

|                  |                                                         |         |         |
|------------------|---------------------------------------------------------|---------|---------|
| TcCLB.503903.70  | hypothetical protein, conserved                         | -0,1858 | 0,1953  |
| TcCLB.510889.170 | hypothetical protein, conserved                         | -0,1859 | 0,02399 |
| TcCLB.506247.130 | hypothetical protein, conserved                         | -0,1859 | 0,03918 |
| TcCLB.509977.61  | surface protease GP63 (pseudogene), putative            | -0,1859 | 0,2897  |
| TcCLB.503581.39  | coatomer delta subunit, putative                        | -0,1861 | 0,1343  |
| TcCLB.510091.20  | hypothetical protein, conserved                         | -0,1861 | 0,2869  |
| TcCLB.506665.30  | trans-sialidase, putative (fragment)                    | -0,1861 | 0,5213  |
| TcCLB.506727.140 | hypothetical protein, conserved                         | -0,1862 | 0,1714  |
| TcCLB.506637.100 | tyrosine phosphatase isoform, putative                  | -0,1863 | 0,144   |
| TcCLB.507793.60  | hypothetical protein, conserved                         | -0,1863 | 0,3861  |
| TcCLB.510123.24  | hypothetical protein, conserved                         | -0,1865 | 0,1217  |
| TcCLB.509885.20  | hypothetical protein, conserved                         | -0,1865 | 0,2078  |
| TcCLB.511295.30  | hypothetical protein, conserved                         | -0,187  | 0,03414 |
| TcCLB.511255.420 | mucin-associated surface protein (MASP, pseudogene), pi | -0,1872 | 0,4938  |
| TcCLB.511395.60  | serine/threonine protein kinase, putative               | -0,1873 | 0,04131 |
| TcCLB.506755.230 | hypothetical protein, conserved                         | -0,1873 | 0,1751  |
| TcCLB.510421.200 | hypothetical protein, conserved                         | -0,1875 | 0,1125  |
| TcCLB.503735.40  | hypothetical protein                                    | -0,1875 | 0,1379  |
| TcCLB.498829.21  | hypothetical protein                                    | -0,1875 | 0,6826  |
| TcCLB.504797.144 | hypothetical protein, conserved                         | -0,1876 | 0,07685 |
| TcCLB.503823.140 | hypothetical protein, conserved                         | -0,1876 | 0,1625  |
| TcCLB.510967.16  | hypothetical protein, conserved                         | -0,1877 | 0,1192  |
| TcCLB.506287.130 | hypothetical protein, conserved                         | -0,1878 | 0,1175  |
| TcCLB.506257.60  | XPA-interacting protein, putative                       | -0,1878 | 0,1323  |
| TcCLB.510197.5   | hypothetical protein, conserved (pseudogene)            | -0,1878 | 0,4437  |
| TcCLB.508163.340 | trans-sialidase (pseudogene), putative                  | -0,1878 | 0,6361  |
| TcCLB.429257.10  | hypothetical protein, conserved                         | -0,1881 | 0,3936  |
| TcCLB.509773.20  | protein kinase, putative                                | -0,1881 | 0,5058  |
| TcCLB.511731.50  | ATP-dependent RNA helicase, putative                    | -0,1882 | 0,1301  |
| TcCLB.510743.110 | hypothetical protein, conserved                         | -0,1884 | 0,1283  |
| TcCLB.506895.80  | trans-sialidase, putative                               | -0,1884 | 0,2273  |
| TcCLB.504191.19  | sterol 24-c-methyltransferase, putative                 | -0,1884 | 0,3629  |
| TcCLB.508071.80  | trans-sialidase (pseudogene), putative                  | -0,1886 | 0,09955 |
| TcCLB.511201.19  | hypothetical protein (fragment)                         | -0,1886 | 0,1345  |
| TcCLB.506177.120 | hypothetical protein                                    | -0,1886 | 0,1699  |
| TcCLB.509319.60  | endo/exonuclease Mre11, putative                        | -0,1887 | 0,03068 |
| TcCLB.511871.100 | hypothetical protein, conserved                         | -0,1887 | 0,08067 |
| TcCLB.507857.80  | hypothetical protein, conserved (pseudogene)            | -0,1888 | 0,08063 |
| TcCLB.511825.66  | hypothetical protein, conserved                         | -0,1888 | 0,2871  |
| TcCLB.510187.360 | hypothetical protein, conserved                         | -0,189  | 0,05736 |
| TcCLB.511421.155 | hypothetical protein, conserved                         | -0,189  | 0,1305  |
| TcCLB.509157.100 | hypothetical protein                                    | -0,189  | 0,2289  |
| TcCLB.511367.10  | hypothetical protein                                    | -0,189  | 0,6701  |
| TcCLB.508461.340 | hypothetical protein, conserved                         | -0,1891 | 0,02169 |
| TcCLB.505765.10  | hypothetical protein, conserved (pseudogene)            | -0,1891 | 0,2437  |

|                  |                                                          |         |         |
|------------------|----------------------------------------------------------|---------|---------|
| TcCLB.507739.30  | hypothetical protein, conserved                          | -0,1893 | 0,064   |
| TcCLB.507991.50  | kinesin, putative                                        | -0,1895 | 0,03695 |
| TcCLB.503837.30  | hypothetical protein, conserved                          | -0,1895 | 0,2086  |
| TcCLB.503845.20  | dispersed gene family protein 1 (DGF-1, pseudogene), put | -0,1895 | 0,4057  |
| TcCLB.508949.50  | protein kinase, putative                                 | -0,1896 | 0,1452  |
| TcCLB.508689.10  | hypothetical protein, conserved                          | -0,1896 | 0,1508  |
| TcCLB.511323.60  | hypothetical protein, conserved                          | -0,1897 | 0,08119 |
| TcCLB.506793.90  | hypothetical protein, conserved                          | -0,1897 | 0,1048  |
| TcCLB.506855.330 | hypothetical protein, conserved                          | -0,1899 | 0,06894 |
| TcCLB.508533.50  | hypothetical protein, conserved                          | -0,19   | 0,01016 |
| TcCLB.507675.39  | hypothetical protein, conserved                          | -0,19   | 0,1144  |
| TcCLB.510001.40  | hypothetical protein, conserved                          | -0,19   | 0,1151  |
| TcCLB.508347.24  | hypothetical protein, conserved                          | -0,1901 | 0,2099  |
| TcCLB.508221.650 | trans-sialidase, Group V, putative                       | -0,1901 | 0,4615  |
| TcCLB.450061.10  | hypothetical protein, conserved                          | -0,1902 | 0,08136 |
| TcCLB.509455.50  | hypothetical protein, conserved                          | -0,1902 | 0,1163  |
| TcCLB.506357.160 | hypothetical protein, conserved                          | -0,1903 | 0,2515  |
| TcCLB.511493.10  | quiescin sulfhydryl oxidase, putative (QSOX)             | -0,1904 | 0,128   |
| TcCLB.508637.114 | histone deacetylase 1, putative                          | -0,1904 | 0,2612  |
| TcCLB.506131.151 | elongation factor 1-gamma (EF-1-gamma, pseudogene),      | -0,1905 | 0,6996  |
| TcCLB.511435.30  | MORN repeat-containing protein                           | -0,1906 | 0,05228 |
| TcCLB.509363.31  | hypothetical protein                                     | -0,1906 | 0,5747  |
| TcCLB.511901.20  | hypothetical protein, conserved                          | -0,1907 | 0,03848 |
| TcCLB.511179.130 | hypothetical protein, conserved                          | -0,1907 | 0,08402 |
| TcCLB.509669.40  | Zn-finger protein, putative                              | -0,1909 | 0,01231 |
| TcCLB.511715.90  | hypothetical protein, conserved                          | -0,1909 | 0,1002  |
| TcCLB.509805.30  | hypothetical protein, conserved                          | -0,1909 | 0,208   |
| TcCLB.511165.70  | proteasome alpha 7 subunit, putative                     | -0,191  | 0,08757 |
| TcCLB.507899.5   | trans-sialidase (pseudogene), putative                   | -0,191  | 0,1072  |
| TcCLB.506525.130 | mitochondrial carrier protein, putative                  | -0,191  | 0,1283  |
| TcCLB.506885.354 | hypothetical protein, conserved                          | -0,1911 | 0,3414  |
| TcCLB.508277.70  | hypothetical protein, conserved                          | -0,1912 | 0,1204  |
| TcCLB.504035.60  | hypothetical protein, conserved                          | -0,1912 | 0,2012  |
| TcCLB.510043.50  | hypothetical protein, conserved                          | -0,1913 | 0,0171  |
| TcCLB.507093.280 | hypothetical protein                                     | -0,1913 | 0,0202  |
| TcCLB.506529.280 | hypothetical protein, conserved                          | -0,1914 | 0,1318  |
| TcCLB.507691.40  | trans-sialidase (pseudogene), putative                   | -0,1915 | 0,1432  |
| TcCLB.510321.10  | RNA polymerase-associated protein CTR9, putative         | -0,1915 | 0,1879  |
| TcCLB.511891.10  | trans-sialidase, Group II, putative                      | -0,1916 | 0,1741  |
| TcCLB.506947.90  | adenylate kinase, putative                               | -0,1917 | 0,1347  |
| TcCLB.510065.60  | hypothetical protein, conserved                          | -0,1919 | 0,2174  |
| TcCLB.508209.110 | hypothetical protein, conserved                          | -0,192  | 0,02368 |
| TcCLB.506519.110 | hypothetical protein, conserved                          | -0,1921 | 0,08145 |
| TcCLB.509007.20  | hypothetical protein, conserved                          | -0,1922 | 0,06641 |
| TcCLB.511715.70  | hypothetical protein, conserved                          | -0,1922 | 0,1064  |

|                  |                                                           |         |         |
|------------------|-----------------------------------------------------------|---------|---------|
| TcCLB.506363.130 | hypothetical protein, conserved                           | -0,1923 | 0,1368  |
| TcCLB.504149.50  | hypothetical protein, conserved                           | -0,1924 | 0,0313  |
| TcCLB.506715.20  | Lys-63-specific deubiquitinase BRCC36, putative           | -0,1924 | 0,252   |
| TcCLB.511751.220 | hypothetical protein, conserved                           | -0,1926 | 0,06259 |
| TcCLB.509633.20  | hypothetical protein, conserved                           | -0,1926 | 0,06796 |
| TcCLB.507963.50  | nuclear cap binding complex subunit CBP30, putative (CBF  | -0,1926 | 0,1095  |
| TcCLB.510329.170 | hypothetical protein, conserved                           | -0,1929 | 0,03881 |
| TcCLB.503999.40  | hypothetical protein, conserved                           | -0,1929 | 0,05445 |
| TcCLB.509119.39  | dynein heavy chain, putative                              | -0,1929 | 0,313   |
| TcCLB.510989.20  | hypothetical protein, conserved                           | -0,193  | 0,09695 |
| TcCLB.508045.20  | hypothetical protein, conserved                           | -0,1933 | 0,08576 |
| TcCLB.509551.140 | hypothetical protein, conserved                           | -0,1934 | 0,05267 |
| TcCLB.506743.120 | Elongator-like Protein 3a, putative                       | -0,1934 | 0,07912 |
| TcCLB.511643.61  | elongation factor 1-gamma (EF-1-gamma, pseudogene),       | -0,1934 | 0,2294  |
| TcCLB.508543.10  | DNA polymerase sigma, putative                            | -0,1936 | 0,02428 |
| TcCLB.504427.280 | hypothetical protein, conserved                           | -0,1936 | 0,08473 |
| TcCLB.510729.119 | hypothetical protein, conserved                           | -0,1936 | 0,1999  |
| TcCLB.506679.10  | hypothetical protein, conserved                           | -0,1936 | 0,2912  |
| TcCLB.509003.50  | hypothetical protein, conserved                           | -0,1936 | 0,295   |
| TcCLB.508989.80  | hypothetical protein                                      | -0,1937 | 0,03101 |
| TcCLB.506319.70  | hypothetical protein                                      | -0,1939 | 0,6211  |
| TcCLB.507927.40  | hypothetical protein, conserved                           | -0,1941 | 0,02907 |
| TcCLB.511153.144 | hypothetical protein, conserved                           | -0,1941 | 0,3988  |
| TcCLB.507969.20  | hypothetical protein, conserved                           | -0,1943 | 0,1625  |
| TcCLB.506181.120 | hypothetical protein, conserved                           | -0,1943 | 0,3086  |
| TcCLB.503435.30  | hypothetical protein, conserved                           | -0,1945 | 0,03525 |
| TcCLB.506525.120 | hypothetical protein, conserved                           | -0,1945 | 0,3556  |
| TcCLB.504129.20  | hypothetical protein, conserved                           | -0,1946 | 0,01969 |
| TcCLB.506435.390 | metallo-peptidase, Clan MA(E) Family M41                  | -0,1946 | 0,05015 |
| TcCLB.508917.20  | hypothetical protein, conserved                           | -0,1946 | 0,1085  |
| TcCLB.509023.209 | hypothetical protein, conserved                           | -0,1949 | 0,06824 |
| TcCLB.511277.20  | DNA-directed RNA polymerase II/III subunit, putative      | -0,195  | 0,1263  |
| TcCLB.511491.100 | phosphatase 2C, putative                                  | -0,1952 | 0,07916 |
| TcCLB.511231.14  | hypothetical protein (fragment)                           | -0,1952 | 0,0826  |
| TcCLB.506479.100 | hypothetical protein, conserved                           | -0,1952 | 0,1411  |
| TcCLB.503687.58  | AMP deaminase, putative                                   | -0,1953 | 0,2636  |
| TcCLB.507023.130 | hypothetical protein, conserved                           | -0,1955 | 0,1001  |
| TcCLB.506145.10  | hypothetical protein, conserved                           | -0,1959 | 0,01222 |
| TcCLB.505097.49  | expression site-associated gene (ESAG-like) protein, puta | -0,196  | 0,5616  |
| TcCLB.507521.120 | hypothetical protein, conserved                           | -0,1961 | 0,228   |
| TcCLB.510099.90  | tyrosine phosphatase isoform, putative                    | -0,1962 | 0,07177 |
| TcCLB.506435.140 | hypothetical protein, conserved                           | -0,1963 | 0,08167 |
| TcCLB.506555.9   | hypothetical protein, conserved (fragment)                | -0,1963 | 0,1427  |
| TcCLB.510409.60  | hypothetical protein, conserved                           | -0,1967 | 0,06915 |
| TcCLB.509693.194 | hypothetical protein, conserved                           | -0,1967 | 0,432   |

|                  |                                                           |         |         |
|------------------|-----------------------------------------------------------|---------|---------|
| TcCLB.504057.110 | ribosomal RNA processing protein 6, putative (RRP6)       | -0,1968 | 0,0317  |
| TcCLB.508695.30  | hypothetical protein (fragment)                           | -0,1972 | 0,148   |
| TcCLB.504643.40  | U6 snRNA-associated Sm-like protein LSm4, putative        | -0,1972 | 0,1933  |
| TcCLB.511423.60  | ribosomal RNA-processing protein 8, putative (RRP8)       | -0,1973 | 0,0869  |
| TcCLB.506251.10  | hypothetical protein, conserved                           | -0,1973 | 0,1312  |
| TcCLB.508671.10  | serine carboxypeptidase (CBP1), putative                  | -0,1973 | 0,1603  |
| TcCLB.510297.110 | cAMP binding protein, putative                            | -0,1974 | 0,01817 |
| TcCLB.505939.60  | ribonuclease H1, putative                                 | -0,1975 | 0,1628  |
| TcCLB.508265.4   | synaptojanin (N-terminal domain), putative (fragment)     | -0,1975 | 0,2373  |
| TcCLB.508647.50  | hypothetical protein, conserved (pseudogene)              | -0,1976 | 0,02374 |
| TcCLB.507963.10  | hypothetical protein, conserved                           | -0,1976 | 0,2277  |
| TcCLB.504187.10  | retrotransposon hot spot protein (RHS, pseudogene), puta  | -0,1976 | 0,5338  |
| TcCLB.507433.9   | ATP-dependent DEAD/H DNA helicase recQ, putative (frag    | -0,1977 | 0,0291  |
| TcCLB.506871.10  | hypothetical protein, conserved                           | -0,1977 | 0,09503 |
| TcCLB.508707.160 | hypothetical protein, conserved                           | -0,1977 | 0,135   |
| TcCLB.506265.110 | hypothetical protein, conserved                           | -0,1978 | 0,1319  |
| TcCLB.511529.190 | hypothetical protein, conserved                           | -0,1979 | 0,2428  |
| TcCLB.504089.14  | hypothetical protein, conserved                           | -0,198  | 0,03463 |
| TcCLB.507949.154 | TFIIH basal transcription factor subunit, putative (TSP1) | -0,198  | 0,1218  |
| TcCLB.504021.140 | hypothetical protein, conserved                           | -0,1981 | 0,04939 |
| TcCLB.504009.30  | hypothetical protein, conserved                           | -0,1981 | 0,07952 |
| TcCLB.503563.20  | ADG2, putative                                            | -0,1982 | 0,09897 |
| TcCLB.507099.20  | hypothetical protein, conserved                           | -0,1983 | 0,04533 |
| TcCLB.507963.60  | hypothetical protein, conserved                           | -0,1983 | 0,2929  |
| TcCLB.506881.10  | hypothetical protein, conserved (pseudogene)              | -0,1983 | 0,4817  |
| TcCLB.488767.20  | retrotransposon hot spot protein (RHS, pseudogene), puta  | -0,1984 | 0,1939  |
| TcCLB.506577.140 | hypothetical protein, conserved                           | -0,1984 | 0,2282  |
| TcCLB.507685.10  | hypothetical protein, conserved                           | -0,1985 | 0,1559  |
| TcCLB.509741.50  | kinesin-like protein (pseudogene), putative               | -0,1985 | 0,2997  |
| TcCLB.509637.18  | hypothetical protein, conserved                           | -0,1986 | 0,1749  |
| TcCLB.507811.44  | phosphoglycerate mutase protein, putative                 | -0,1986 | 0,2118  |
| TcCLB.510053.30  | hypothetical protein, conserved                           | -0,1987 | 0,09789 |
| TcCLB.508857.60  | hypothetical protein, conserved                           | -0,1987 | 0,1483  |
| TcCLB.507049.179 | hypothetical protein, conserved                           | -0,1989 | 0,08787 |
| TcCLB.503565.20  | hypothetical protein, conserved                           | -0,1989 | 0,1058  |
| TcCLB.506891.10  | Metal-binding domain-containing protein                   | -0,1989 | 0,1382  |
| TcCLB.508207.200 | small GTP-binding protein, putative                       | -0,1991 | 0,06465 |
| TcCLB.510643.20  | retrotransposon hot spot protein (RHS, pseudogene), puta  | -0,1991 | 0,1818  |
| TcCLB.506247.250 | hypothetical protein, conserved                           | -0,1993 | 0,00836 |
| TcCLB.509937.10  | poly(A) polymerase, putative                              | -0,1995 | 0,1023  |
| TcCLB.508325.20  | retrotransposon hot spot protein (RHS, pseudogene), puta  | -0,1997 | 0,2941  |
| TcCLB.506855.240 | bilobe protein, conserved (pseudogene)                    | -0,1998 | 0,01002 |
| TcCLB.506139.10  | mucin-associated surface protein (MASP), putative         | -0,1998 | 0,6373  |
| TcCLB.510729.10  | AMP deaminase, putative                                   | -0,1999 | 0,07252 |
| TcCLB.508629.63  | ATP-dependent DEAD/H RNA helicase (pseudogene), puta      | -0,2    | 0,4512  |



|                  |                                                          |         |         |
|------------------|----------------------------------------------------------|---------|---------|
| TcCLB.506275.30  | hypothetical protein, conserved                          | -0,2002 | 0,2078  |
| TcCLB.511435.10  | WD40 repeat-containing protein                           | -0,2003 | 0,04654 |
| TcCLB.506605.40  | hypothetical protein, conserved                          | -0,2004 | 0,1056  |
| TcCLB.509715.104 | protein kinase, putative                                 | -0,2006 | 0,05974 |
| TcCLB.506647.20  | hypothetical protein, conserved                          | -0,2007 | 0,05865 |
| TcCLB.506519.100 | hypothetical protein, conserved                          | -0,2007 | 0,2162  |
| TcCLB.511283.50  | hypothetical protein, conserved                          | -0,2008 | 0,2702  |
| TcCLB.506435.130 | hypothetical protein, conserved                          | -0,2009 | 0,08654 |
| TcCLB.504057.11  | phospholipid-translocating ATPase, putative              | -0,2011 | 0,03177 |
| TcCLB.507677.10  | hypothetical protein, conserved                          | -0,2012 | 0,0625  |
| TcCLB.506529.30  | hypothetical protein, conserved                          | -0,2012 | 0,2566  |
| TcCLB.509105.20  | palmitoyl acyltransferase 2, putative                    | -0,2013 | 0,1401  |
| TcCLB.506113.50  | ATP-dependent DEAD/H RNA helicase (pseudogene), puta     | -0,2014 | 0,4156  |
| TcCLB.508235.10  | hypothetical protein, conserved (pseudogene)             | -0,2015 | 0,1178  |
| TcCLB.509965.150 | hypothetical protein, conserved                          | -0,2016 | 0,1253  |
| TcCLB.508777.70  | hypothetical protein, conserved                          | -0,202  | 0,1015  |
| TcCLB.510835.20  | hypothetical protein, conserved                          | -0,2021 | 0,08877 |
| TcCLB.511033.10  | hypothetical protein, conserved                          | -0,2022 | 0,0923  |
| TcCLB.507233.60  | retrotransposon hot spot protein (RHS, pseudogene), puta | -0,2022 | 0,108   |
| TcCLB.510777.29  | eukaryotic translation initiation factor 4E, putative    | -0,2022 | 0,2871  |
| TcCLB.463155.40  | glycine dehydrogenase [decarboxylating] (pseudogene), pi | -0,2023 | 0,1349  |
| TcCLB.504127.10  | surface protease GP63 (pseudogene), putative             | -0,2023 | 0,4374  |
| TcCLB.412943.9   | hypothetical protein, conserved                          | -0,2024 | 0,1995  |
| TcCLB.511109.50  | hypothetical protein, conserved (pseudogene)             | -0,2026 | 0,1651  |
| TcCLB.503487.40  | hypothetical protein, conserved                          | -0,2027 | 0,03811 |
| TcCLB.453995.10  | retrotransposon hot spot protein (RHS, pseudogene), puta | -0,2027 | 0,1262  |
| TcCLB.508465.50  | hypothetical protein, conserved                          | -0,2028 | 0,1043  |
| TcCLB.508425.31  | hypothetical protein, conserved (pseudogene)             | -0,2028 | 0,1279  |
| TcCLB.504081.310 | syntaxin binding protein (pseudogene), putative          | -0,2029 | 0,5561  |
| TcCLB.511661.10  | hypothetical protein, conserved                          | -0,2031 | 0,02596 |
| TcCLB.510879.210 | hypothetical protein, conserved                          | -0,2031 | 0,1381  |
| TcCLB.510055.100 | hypothetical protein, conserved                          | -0,2033 | 0,0422  |
| TcCLB.504017.60  | hypothetical protein, conserved                          | -0,2033 | 0,1269  |
| TcCLB.507723.20  | hypothetical protein                                     | -0,2033 | 0,4684  |
| TcCLB.510377.300 | trans-sialidase (pseudogene), putative                   | -0,2034 | 0,4634  |
| TcCLB.505807.260 | hypothetical protein, conserved                          | -0,2037 | 0,1001  |
| TcCLB.504131.80  | hypothetical protein, conserved                          | -0,2038 | 0,1322  |
| TcCLB.504247.70  | AATF protein, putative (pseudogene)                      | -0,2038 | 0,1482  |
| TcCLB.507163.80  | hypothetical protein, conserved                          | -0,2038 | 0,2049  |
| TcCLB.508719.9   | hypothetical protein, conserved                          | -0,2039 | 0,0154  |
| TcCLB.506883.40  | Lsm12 protein, putative                                  | -0,204  | 0,06881 |
| TcCLB.506301.20  | Golgi reassembly stacking protein (GRASP homologue), pi  | -0,204  | 0,1002  |
| TcCLB.511153.60  | palmitoyl acyltransferase 9, putative                    | -0,204  | 0,1228  |
| TcCLB.505955.30  | surface protease GP63 (pseudogene), putative             | -0,2041 | 0,3183  |
| TcCLB.510285.30  | hypothetical protein, conserved                          | -0,2044 | 0,06378 |

|                  |                                                          |         |          |
|------------------|----------------------------------------------------------|---------|----------|
| TcCLB.511855.40  | hypothetical protein, conserved                          | -0,2044 | 0,1041   |
| TcCLB.510719.290 | Golgi SNAP receptor complex member 1, putative           | -0,2044 | 0,1339   |
| TcCLB.506923.10  | trans-sialidase (pseudogene), putative                   | -0,2044 | 0,3364   |
| TcCLB.506729.70  | hypothetical protein, conserved                          | -0,2045 | 0,09652  |
| TcCLB.506435.220 | hypothetical protein, conserved                          | -0,2045 | 0,1852   |
| TcCLB.507925.69  | hypothetical protein, conserved                          | -0,2045 | 0,193    |
| TcCLB.508193.45  | trans-sialidase (pseudogene), putative                   | -0,2045 | 0,2419   |
| TcCLB.511283.230 | hypothetical protein, conserved                          | -0,2046 | 0,01507  |
| TcCLB.510433.10  | hypothetical protein                                     | -0,2047 | 0,05865  |
| TcCLB.503519.30  | mucin-associated surface protein (MASP), putative        | -0,2047 | 0,3462   |
| TcCLB.510749.50  | Flagellar Member 5 (FLAM5)                               | -0,2048 | 0,07965  |
| TcCLB.508999.49  | hypothetical protein                                     | -0,2048 | 0,5806   |
| TcCLB.508977.111 | elongation factor 1-gamma (EF-1-gamma, pseudogene),      | -0,2049 | 0,4066   |
| TcCLB.508693.30  | hypothetical protein, conserved                          | -0,205  | 0,0384   |
| TcCLB.509203.30  | hd phosphohydrolase family protein                       | -0,2053 | 0,2518   |
| TcCLB.507239.10  | hypothetical protein, conserved                          | -0,2053 | 0,2842   |
| TcCLB.508153.850 | hypothetical protein, conserved                          | -0,2054 | 0,03873  |
| TcCLB.508387.130 | ATPase, putative                                         | -0,2055 | 0,07351  |
| TcCLB.504625.10  | trans-splicing factor, putative                          | -0,2056 | 0,08637  |
| TcCLB.511183.170 | trans-sialidase (pseudogene), putative                   | -0,2056 | 0,4571   |
| TcCLB.511517.80  | replication factor C, subunit 2, putative                | -0,2058 | 0,07782  |
| TcCLB.510243.70  | hypothetical protein, conserved                          | -0,206  | 0,02239  |
| TcCLB.511423.110 | hypothetical protein, conserved                          | -0,206  | 0,08197  |
| TcCLB.416143.10  | Lys-63-specific deubiquitinase BRCC36, putative          | -0,2062 | 0,03542  |
| TcCLB.508951.4   | protein kinase, putative (fragment)                      | -0,2062 | 0,4038   |
| TcCLB.503811.20  | U3 small nucleolar ribonucleoprotein protein MPP10, puta | -0,2063 | 0,03547  |
| TcCLB.510747.120 | hypothetical protein, conserved                          | -0,2063 | 0,05832  |
| TcCLB.506517.140 | hypothetical protein, conserved                          | -0,2063 | 0,06816  |
| TcCLB.401473.9   | DNA-directed rna polymerase I largest subunit, putative  | -0,2064 | 0,1762   |
| TcCLB.506559.280 | hypothetical protein, conserved                          | -0,2066 | 0,02204  |
| TcCLB.506989.180 | U3 small nucleolar ribonucleoprotein protein MPP10, puta | -0,2067 | 0,03894  |
| TcCLB.508579.10  | hypothetical protein, conserved                          | -0,2069 | 0,1737   |
| TcCLB.506511.10  | hypothetical protein, conserved                          | -0,2069 | 0,2514   |
| TcCLB.503821.19  | hypothetical protein, conserved                          | -0,207  | 0,1263   |
| TcCLB.508995.50  | hypothetical protein, conserved                          | -0,2071 | 0,1242   |
| TcCLB.511001.70  | phosphatidylinositol-4-phosphate 5-kinase-like, putative | -0,2072 | 0,02272  |
| TcCLB.506579.10  | ABC transporter, putative                                | -0,2072 | 0,02609  |
| TcCLB.508153.940 | hypothetical protein, conserved (pseudogene)             | -0,2073 | 0,009475 |
| TcCLB.511585.170 | protein kinase, putative                                 | -0,2074 | 0,02112  |
| TcCLB.509229.40  | hypothetical protein, conserved                          | -0,2074 | 0,03192  |
| TcCLB.509733.80  | hypothetical protein, conserved                          | -0,2074 | 0,1001   |
| TcCLB.510901.90  | ATPase protein, putative                                 | -0,2074 | 0,1244   |
| TcCLB.504073.20  | hypothetical protein, conserved                          | -0,2076 | 0,05645  |
| TcCLB.508529.40  | trans-sialidase (pseudogene), putative                   | -0,2076 | 0,1052   |
| TcCLB.506123.20  | hypothetical protein, conserved                          | -0,2076 | 0,138    |

|                  |                                                          |         |          |
|------------------|----------------------------------------------------------|---------|----------|
| TcCLB.511397.10  | mucin-associated surface protein (MASP, pseudogene), pu  | -0,2076 | 0,5274   |
| TcCLB.504625.70  | kinetoplast DNA-associated protein, putative             | -0,2077 | 0,03089  |
| TcCLB.506855.100 | hypothetical protein, conserved                          | -0,2077 | 0,1241   |
| TcCLB.508153.910 | hypothetical protein, conserved                          | -0,2077 | 0,1343   |
| TcCLB.509567.34  | hypothetical protein, conserved                          | -0,2078 | 0,08413  |
| TcCLB.503779.80  | hypothetical protein, conserved (pseudogene)             | -0,208  | 0,04482  |
| TcCLB.509433.30  | hypothetical protein                                     | -0,208  | 0,3031   |
| TcCLB.509179.140 | myo-inositol-1(or 4)-monophosphatase 1, putative         | -0,2081 | 0,2254   |
| TcCLB.506947.20  | hypothetical protein, conserved                          | -0,2082 | 0,04334  |
| TcCLB.510877.70  | ATP-dependent RNA and DNA helicase, mitochondrial, pu    | -0,2083 | 0,04367  |
| TcCLB.506407.110 | hypothetical protein, conserved                          | -0,2083 | 0,2035   |
| TcCLB.508277.150 | proliferative cell nuclear antigen (PCNA), putative      | -0,2084 | 0,008141 |
| TcCLB.507023.160 | hypothetical protein, conserved                          | -0,2085 | 0,007245 |
| TcCLB.504109.20  | hypothetical protein, conserved                          | -0,2085 | 0,02932  |
| TcCLB.511903.160 | phosphatidylinositol 3-kinase vps34-like                 | -0,2086 | 0,01386  |
| TcCLB.503723.90  | glyceraldehyde 3-phosphate dehydrogenase, C-terminal d   | -0,2086 | 0,4282   |
| TcCLB.511179.120 | hypothetical protein, conserved                          | -0,2087 | 0,142    |
| TcCLB.406377.10  | hypothetical protein, conserved (pseudogene)             | -0,2087 | 0,3126   |
| TcCLB.510659.70  | protein kinase-like protein, putative                    | -0,2088 | 0,05603  |
| TcCLB.511667.10  | hypothetical protein, conserved                          | -0,2089 | 0,5005   |
| TcCLB.510943.150 | glycerol-3-phosphate acyltransferase, putative           | -0,209  | 0,1057   |
| TcCLB.503917.28  | hypothetical protein, conserved                          | -0,2091 | 0,0311   |
| TcCLB.509965.60  | RNA decapping enzyme, putative (Dcp2)                    | -0,2091 | 0,1598   |
| TcCLB.506667.20  | hypothetical protein                                     | -0,2092 | 0,6168   |
| TcCLB.510945.40  | hypothetical protein, conserved                          | -0,2093 | 0,04054  |
| TcCLB.510351.110 | hypothetical protein                                     | -0,2093 | 0,05582  |
| TcCLB.508303.44  | hypothetical protein, conserved                          | -0,2093 | 0,1726   |
| TcCLB.510187.130 | Bardet-Biedl syndrome 4 protein, putative (BBS4)         | -0,2094 | 0,05236  |
| TcCLB.511137.20  | hypothetical protein, conserved                          | -0,2094 | 0,1271   |
| TcCLB.503399.20  | hydrolase, alpha/beta fold family, putative              | -0,2095 | 0,165    |
| TcCLB.510761.22  | hypothetical protein, conserved                          | -0,2097 | 0,04105  |
| TcCLB.510655.110 | poly(A)-specific ribonuclease PARN, putative             | -0,21   | 0,04671  |
| TcCLB.510911.30  | Ras-related protein Rab4, putative (RAB4)                | -0,2101 | 0,04049  |
| TcCLB.506287.80  | hypothetical protein, conserved                          | -0,2102 | 0,0784   |
| TcCLB.508675.40  | hypothetical protein, conserved                          | -0,2103 | 0,06561  |
| TcCLB.507041.132 | hypothetical protein (fragment)                          | -0,2103 | 0,3147   |
| TcCLB.511407.20  | hypothetical protein, conserved                          | -0,2105 | 0,09734  |
| TcCLB.511285.30  | hypothetical protein, conserved                          | -0,2105 | 0,1127   |
| TcCLB.508057.41  | trans-sialidase (pseudogene), putative                   | -0,2105 | 0,4765   |
| TcCLB.507661.10  | retrotransposon hot spot protein (RHS, pseudogene), puta | -0,2105 | 0,6739   |
| TcCLB.511169.29  | tubulin-tyrsoine ligase-like protein, putative           | -0,2106 | 0,01525  |
| TcCLB.511751.144 | hypothetical protein, conserved                          | -0,2106 | 0,03415  |
| TcCLB.508173.84  | hypothetical protein, conserved                          | -0,2106 | 0,06288  |
| TcCLB.511211.10  | hypothetical protein, conserved                          | -0,2108 | 0,1204   |
| TcCLB.504449.30  | hypothetical protein, conserved                          | -0,2109 | 0,008533 |

|                  |                                                        |         |           |
|------------------|--------------------------------------------------------|---------|-----------|
| TcCLB.508153.240 | hypothetical protein, conserved                        | -0,2109 | 0,05837   |
| TcCLB.511261.80  | hypothetical protein, conserved                        | -0,211  | 0,03015   |
| TcCLB.511003.90  | hypothetical protein, conserved                        | -0,2111 | 0,04973   |
| TcCLB.509797.69  | hypothetical protein, conserved (fragment)             | -0,2111 | 0,05914   |
| TcCLB.510431.240 | hypothetical protein, conserved                        | -0,2111 | 0,06494   |
| TcCLB.506703.30  | mucin TcMUCII (pseudogene), putative                   | -0,2111 | 0,5821    |
| TcCLB.509941.120 | protein kinase, putative                               | -0,2112 | 0,05874   |
| TcCLB.511309.14  | hypothetical protein, conserved                        | -0,2113 | 0,3329    |
| TcCLB.511821.50  | hypothetical protein, conserved                        | -0,2115 | 0,1094    |
| TcCLB.509227.20  | mucin-associated surface protein (MASP, pseudogene), p | -0,2117 | 0,02463   |
| TcCLB.507809.130 | hypothetical protein, conserved                        | -0,2118 | 0,01538   |
| TcCLB.506593.10  | hypothetical protein, conserved                        | -0,212  | 0,2117    |
| TcCLB.508979.15  | mucin-associated surface protein (MASP, pseudogene), p | -0,2122 | 0,6948    |
| TcCLB.506625.140 | hypothetical protein, conserved                        | -0,2124 | 0,08179   |
| TcCLB.511215.70  | kinesin, putative                                      | -0,2124 | 0,08593   |
| TcCLB.509353.40  | PTP1-interacting protein, 39 kDa, putative             | -0,2125 | 0,03638   |
| TcCLB.510983.19  | retrotransposon hot spot (RHS) protein, putative       | -0,2125 | 0,1397    |
| TcCLB.505925.10  | trans-sialidase, putative (fragment)                   | -0,2125 | 0,2833    |
| TcCLB.503949.40  | UDP-Gal or UDP-GlcNAc-dependent glycosyltransferase, p | -0,2129 | 0,1364    |
| TcCLB.510729.130 | DNA replication licensing factor MCM9, putative        | -0,213  | 0,04263   |
| TcCLB.503789.70  | hypothetical protein, conserved                        | -0,2131 | 0,02818   |
| TcCLB.510077.30  | Mitogen-activated kinase kinase kinase, putative       | -0,2131 | 0,2404    |
| TcCLB.507049.110 | hypothetical protein, conserved                        | -0,2132 | 0,2319    |
| TcCLB.504881.30  | hypothetical protein, conserved                        | -0,2133 | 0,0007415 |
| TcCLB.510329.190 | hypothetical protein, conserved                        | -0,2134 | 0,02147   |
| TcCLB.507029.10  | hypothetical protein, conserved                        | -0,2134 | 0,07802   |
| TcCLB.508303.30  | hypothetical protein, conserved                        | -0,2135 | 0,1607    |
| TcCLB.506459.30  | trans-sialidase (pseudogene), putative                 | -0,2137 | 0,1711    |
| TcCLB.511367.40  | hypothetical protein                                   | -0,2137 | 0,4975    |
| TcCLB.503891.30  | phosphatidylinositol-4-phosphate 5-kinase, putative    | -0,2138 | 0,1146    |
| TcCLB.508323.40  | hypothetical protein, conserved                        | -0,2138 | 0,1778    |
| TcCLB.506181.110 | hypothetical protein, conserved                        | -0,2141 | 0,279     |
| TcCLB.507641.70  | hypothetical protein, conserved                        | -0,2143 | 0,0567    |
| TcCLB.506559.460 | hypothetical protein                                   | -0,2144 | 0,07265   |
| TcCLB.504643.20  | hypothetical protein, conserved                        | -0,2144 | 0,1211    |
| TcCLB.506297.30  | hypothetical protein, conserved                        | -0,2145 | 0,004966  |
| TcCLB.511217.190 | hypothetical protein, conserved                        | -0,2146 | 0,3925    |
| TcCLB.511127.400 | serine/threonine protein phosphatase, putative         | -0,2147 | 0,04986   |
| TcCLB.511727.110 | hypothetical protein, conserved                        | -0,2147 | 0,05264   |
| TcCLB.510889.270 | hypothetical protein, conserved                        | -0,2148 | 0,09692   |
| TcCLB.509067.14  | hypothetical protein, conserved                        | -0,2148 | 0,1993    |
| TcCLB.508593.69  | hypothetical protein, conserved                        | -0,2148 | 0,2705    |
| TcCLB.510045.30  | protein kinase, putative                               | -0,2149 | 0,09762   |
| TcCLB.507063.60  | hypothetical protein, conserved                        | -0,2149 | 0,6021    |
| TcCLB.506957.70  | hypothetical protein, conserved                        | -0,215  | 0,0478    |

|                  |                                                          |         |          |
|------------------|----------------------------------------------------------|---------|----------|
| TcCLB.510363.250 | trans-sialidase, Group V, putative                       | -0,215  | 0,5386   |
| TcCLB.507521.140 | hypothetical protein, conserved                          | -0,2152 | 0,01112  |
| TcCLB.506515.20  | O-sialoglycoprotein endopeptidase, putative              | -0,2152 | 0,06299  |
| TcCLB.507099.140 | endomembrane protein, putative                           | -0,2153 | 0,007988 |
| TcCLB.511517.130 | hypothetical protein, conserved                          | -0,2153 | 0,07042  |
| TcCLB.510699.27  | elongation factor 1-gamma (EF-1-gamma, pseudogene),      | -0,2153 | 0,6425   |
| TcCLB.511725.200 | hypothetical protein, conserved                          | -0,2156 | 0,03353  |
| TcCLB.503799.4   | protein kinase, putative (fragment)                      | -0,216  | 0,1957   |
| TcCLB.506857.90  | proteasome regulatory ATPase subunit 1, putative         | -0,2161 | 0,01241  |
| TcCLB.510943.140 | DNA primase large subunit, putative (pril)               | -0,2161 | 0,02624  |
| TcCLB.506537.71  | hypothetical protein, conserved (pseudogene)             | -0,2164 | 0,06807  |
| TcCLB.511287.140 | hypothetical protein, conserved                          | -0,2165 | 0,02033  |
| TcCLB.508213.49  | hypothetical protein, conserved                          | -0,2165 | 0,1975   |
| TcCLB.510953.30  | hypothetical protein, conserved                          | -0,2166 | 0,05527  |
| TcCLB.509453.4   | hypothetical protein, conserved                          | -0,2167 | 0,1168   |
| TcCLB.511575.60  | isocitrate dehydrogenase [NADP], mitochondrial precursor | -0,2168 | 0,1353   |
| TcCLB.510823.50  | hypothetical protein, conserved                          | -0,2169 | 0,03242  |
| TcCLB.510105.33  | RNA-binding protein, putative                            | -0,2169 | 0,361    |
| TcCLB.509791.110 | hypothetical protein, conserved                          | -0,217  | 0,04393  |
| TcCLB.511731.40  | hypothetical protein, conserved                          | -0,217  | 0,04538  |
| TcCLB.510075.60  | hypothetical protein                                     | -0,2171 | 0,201    |
| TcCLB.503851.24  | protein tyrosine phosphatase PRL                         | -0,2171 | 0,262    |
| TcCLB.511127.380 | hypothetical protein, conserved                          | -0,2172 | 0,005688 |
| TcCLB.511395.90  | serine/threonine protein kinase, putative                | -0,2172 | 0,03482  |
| TcCLB.506945.180 | hypothetical protein, conserved                          | -0,2173 | 0,00879  |
| TcCLB.504243.30  | hypothetical protein, conserved                          | -0,2173 | 0,01743  |
| TcCLB.511289.50  | mitogen-activated protein kinase 9, putative (MPK9)      | -0,2173 | 0,05527  |
| TcCLB.508893.20  | hypothetical protein, conserved                          | -0,2176 | 0,0104   |
| TcCLB.506629.170 | hypothetical protein                                     | -0,2176 | 0,3265   |
| TcCLB.511613.50  | mucin TcMUCII, putative                                  | -0,2176 | 0,4824   |
| TcCLB.511825.110 | hypothetical protein                                     | -0,2176 | 0,5734   |
| TcCLB.506853.20  | hypothetical protein, conserved                          | -0,2177 | 0,02339  |
| TcCLB.506713.10  | hypothetical protein, conserved                          | -0,2178 | 0,1123   |
| TcCLB.506245.80  | hypothetical protein, conserved (pseudogene)             | -0,2178 | 0,357    |
| TcCLB.506737.140 | syntaxin binding protein 1, putative                     | -0,218  | 0,00701  |
| TcCLB.399033.10  | hypothetical protein                                     | -0,218  | 0,24     |
| TcCLB.507625.190 | hypothetical protein, conserved                          | -0,2184 | 0,0549   |
| TcCLB.507769.50  | ATP-dependent DEAD/H RNA helicase (pseudogene), puta     | -0,2184 | 0,2248   |
| TcCLB.506797.110 | hypothetical protein, conserved                          | -0,2184 | 0,2249   |
| TcCLB.507509.70  | hypothetical protein, conserved                          | -0,2185 | 0,05811  |
| TcCLB.507615.60  | hypothetical protein, conserved                          | -0,2185 | 0,1177   |
| TcCLB.508641.310 | hypothetical protein, conserved                          | -0,2187 | 0,01925  |
| TcCLB.508405.30  | Suppressor of G2 allele of SKP1, putative                | -0,2188 | 0,09632  |
| TcCLB.505983.30  | hypothetical protein, conserved                          | -0,219  | 0,01032  |
| TcCLB.511727.240 | hypothetical protein                                     | -0,219  | 0,03613  |

|                  |                                                             |         |          |
|------------------|-------------------------------------------------------------|---------|----------|
| TcCLB.510257.120 | hypothetical protein, conserved                             | -0,2192 | 0,05175  |
| TcCLB.506513.120 | hypothetical protein, conserved                             | -0,2193 | 0,02895  |
| TcCLB.507019.110 | hypothetical protein                                        | -0,2193 | 0,1775   |
| TcCLB.507395.30  | hypothetical protein                                        | -0,2193 | 0,2567   |
| TcCLB.508693.90  | peroxisome biogenesis factor 1, putative                    | -0,2195 | 0,01036  |
| TcCLB.509757.40  | hypothetical protein, conserved                             | -0,2196 | 0,2019   |
| TcCLB.506945.359 | damage-specific DNA binding protein, putative               | -0,2198 | 0,04105  |
| TcCLB.508851.154 | hypothetical protein, conserved                             | -0,2201 | 0,3443   |
| TcCLB.511217.180 | hypothetical protein, conserved                             | -0,2202 | 0,03242  |
| TcCLB.508465.80  | hypothetical protein, conserved                             | -0,2202 | 0,1639   |
| TcCLB.506661.110 | hypothetical protein, conserved                             | -0,2205 | 0,008167 |
| TcCLB.508781.70  | palmitoyl acyltransferase 3, putative                       | -0,2205 | 0,04441  |
| TcCLB.511735.60  | superoxide dismutase, putative                              | -0,2205 | 0,06754  |
| TcCLB.506925.40  | RNA polymerase I second largest subunit, putative           | -0,2206 | 0,003252 |
| TcCLB.510889.205 | hypothetical protein, conserved                             | -0,2206 | 0,0678   |
| TcCLB.505183.124 | hypothetical protein, conserved                             | -0,2206 | 0,09107  |
| TcCLB.510297.20  | hypothetical protein, conserved                             | -0,2207 | 0,02893  |
| TcCLB.507913.39  | glutaminyl-tRNA synthetase, putative                        | -0,2208 | 0,1404   |
| TcCLB.504741.190 | hypothetical protein, conserved                             | -0,2211 | 0,1755   |
| TcCLB.509993.51  | mucin-associated surface protein (MASP, pseudogene), pu     | -0,2211 | 0,4973   |
| TcCLB.504155.200 | syntaxin binding protein (pseudogene), putative             | -0,2211 | 0,6662   |
| TcCLB.511649.169 | ATP-dependent DEAD/H RNA helicase, putative                 | -0,2212 | 0,04307  |
| TcCLB.506053.35  | hypothetical protein, conserved (pseudogene)                | -0,2212 | 0,1227   |
| TcCLB.507017.159 | hypothetical protein, conserved                             | -0,2213 | 0,1427   |
| TcCLB.507027.30  | hypothetical protein, conserved (pseudogene)                | -0,2214 | 0,009003 |
| TcCLB.507103.29  | hypothetical protein, conserved (fragment)                  | -0,2215 | 0,128    |
| TcCLB.506459.195 | hypothetical protein, conserved                             | -0,2216 | 0,5104   |
| TcCLB.508989.90  | Eukaryotic translation initiation factor 4 gamma type 5, pu | -0,2217 | 0,008115 |
| TcCLB.504703.20  | hypothetical protein, conserved                             | -0,2217 | 0,02366  |
| TcCLB.509647.140 | hypothetical protein, conserved                             | -0,2218 | 0,02354  |
| TcCLB.510089.39  | CAAX amino terminal protease, putative                      | -0,2218 | 0,1754   |
| TcCLB.511577.110 | exopolyphosphatase                                          | -0,2218 | 0,1872   |
| TcCLB.503959.60  | hypothetical protein, conserved                             | -0,2219 | 0,02545  |
| TcCLB.506341.30  | beta galactofuranosyl glycosyltransferase, putative         | -0,222  | 0,04198  |
| TcCLB.510653.10  | hypothetical protein, conserved                             | -0,222  | 0,1889   |
| TcCLB.506297.300 | eukaryotic release factor 3, putative                       | -0,2223 | 0,005144 |
| TcCLB.509721.20  | hypothetical protein, conserved                             | -0,2225 | 0,07003  |
| TcCLB.508625.60  | hypothetical protein, conserved                             | -0,2225 | 0,113    |
| TcCLB.506795.100 | hypothetical protein                                        | -0,2225 | 0,4365   |
| TcCLB.511301.130 | protein kinase, putative                                    | -0,2226 | 0,1085   |
| TcCLB.504741.30  | protein phosphatase 2C, putative                            | -0,2226 | 0,1098   |
| TcCLB.510487.30  | hypothetical protein, conserved (pseudogene)                | -0,2227 | 0,1923   |
| TcCLB.506529.200 | hypothetical protein, conserved                             | -0,2229 | 0,03543  |
| TcCLB.510575.180 | adenylate kinase, putative                                  | -0,2229 | 0,08207  |
| TcCLB.510311.50  | hypothetical protein, conserved                             | -0,2231 | 0,004323 |

|                  |                                                          |         |          |
|------------------|----------------------------------------------------------|---------|----------|
| TcCLB.506175.40  | hypothetical protein, conserved                          | -0,2232 | 0,02891  |
| TcCLB.510749.40  | ubiquitin hydrolase, putative                            | -0,2232 | 0,3523   |
| TcCLB.504005.29  | hypothetical protein, conserved                          | -0,2233 | 0,1651   |
| TcCLB.506957.130 | hypothetical protein, conserved                          | -0,2234 | 0,04947  |
| TcCLB.507083.30  | apurinic/aprimidinic endonuclease, putative              | -0,2234 | 0,06827  |
| TcCLB.511629.20  | hypothetical protein, conserved                          | -0,2236 | 0,09429  |
| TcCLB.507941.40  | hypothetical protein, conserved                          | -0,2237 | 0,04959  |
| TcCLB.506009.100 | ADP-ribosylation factor-like protein, putative           | -0,2239 | 0,1015   |
| TcCLB.506955.261 | hypothetical protein, conserved (pseudogene)             | -0,2239 | 0,4187   |
| TcCLB.510901.260 | tRNA pseudouridine synthase (pseudogene), putative       | -0,224  | 0,09213  |
| TcCLB.510199.20  | elongation factor 1-gamma (EF-1-gamma, pseudogene),      | -0,224  | 0,5483   |
| TcCLB.510329.100 | leucine-rich repeat protein, putative                    | -0,2242 | 0,04058  |
| TcCLB.508909.150 | hypothetical protein, conserved                          | -0,2242 | 0,2658   |
| TcCLB.508675.60  | hypothetical protein, conserved                          | -0,2243 | 0,03516  |
| TcCLB.506297.340 | hypothetical protein, conserved                          | -0,2243 | 0,0448   |
| TcCLB.506335.80  | hypothetical protein                                     | -0,2243 | 0,6038   |
| TcCLB.509007.10  | hypothetical protein, conserved                          | -0,2246 | 0,03635  |
| TcCLB.508789.204 | mucin-associated surface protein (MASP, pseudogene), pi  | -0,2247 | 0,5082   |
| TcCLB.506195.90  | adenylate kinase 2                                       | -0,2248 | 0,03458  |
| TcCLB.508153.70  | hypothetical protein, conserved                          | -0,2249 | 0,08451  |
| TcCLB.506221.90  | hypothetical protein, conserved                          | -0,225  | 0,0181   |
| TcCLB.508317.40  | hypothetical protein, conserved                          | -0,225  | 0,2236   |
| TcCLB.511233.100 | NUDIX hydrolase 3, putative (Nudix3)                     | -0,2255 | 0,1359   |
| TcCLB.507949.260 | Cell cycle checkpoint protein RAD1-like, putative        | -0,2255 | 0,1807   |
| TcCLB.507007.90  | hypothetical protein, conserved                          | -0,2256 | 0,1272   |
| TcCLB.511563.30  | retrotransposon hot spot protein (RHS, pseudogene), puta | -0,2256 | 0,5775   |
| TcCLB.508475.40  | hypothetical protein                                     | -0,2259 | 0,2291   |
| TcCLB.511127.260 | DNA photolyase, putative                                 | -0,2264 | 0,01905  |
| TcCLB.507925.10  | hypothetical protein, conserved (pseudogene)             | -0,2264 | 0,3718   |
| TcCLB.506263.49  | hypothetical protein, conserved (fragment)               | -0,2265 | 0,1361   |
| TcCLB.503583.90  | hydrogenase, putative                                    | -0,2266 | 0,04815  |
| TcCLB.504125.80  | hypothetical protein, conserved                          | -0,2269 | 0,01878  |
| TcCLB.510103.10  | hypothetical protein                                     | -0,227  | 0,1569   |
| TcCLB.510517.70  | hypothetical protein, conserved                          | -0,2271 | 0,008287 |
| TcCLB.509561.80  | plectin-like protein, putative                           | -0,2272 | 0,06031  |
| TcCLB.506825.80  | hypothetical protein, conserved                          | -0,2273 | 0,006433 |
| TcCLB.510315.20  | mitochondrial carrier protein, putative                  | -0,2273 | 0,06332  |
| TcCLB.508963.20  | small GTP-binding protein Rab18, putative                | -0,2273 | 0,06726  |
| TcCLB.509643.20  | hypothetical protein, conserved                          | -0,2275 | 0,03362  |
| TcCLB.508815.50  | hypothetical protein, conserved                          | -0,2277 | 0,06865  |
| TcCLB.506435.10  | hypothetical protein, conserved                          | -0,2277 | 0,1448   |
| TcCLB.506649.60  | hypothetical protein, conserved                          | -0,228  | 0,0212   |
| TcCLB.503727.20  | hypothetical protein, conserved                          | -0,2281 | 0,01864  |
| TcCLB.405165.10  | hypothetical protein, conserved                          | -0,2281 | 0,1299   |
| TcCLB.506303.130 | hypothetical protein, conserved                          | -0,2282 | 0,0242   |

|                  |                                                             |         |          |
|------------------|-------------------------------------------------------------|---------|----------|
| TcCLB.510187.490 | hypothetical protein, conserved                             | -0,2282 | 0,1203   |
| TcCLB.506009.109 | hypothetical protein, conserved                             | -0,2284 | 0,1753   |
| TcCLB.508307.160 | hypothetical protein, conserved                             | -0,2286 | 0,01576  |
| TcCLB.509767.200 | hypothetical protein, conserved                             | -0,2286 | 0,05832  |
| TcCLB.506753.200 | hypothetical protein, conserved                             | -0,2287 | 0,02994  |
| TcCLB.506559.500 | hypothetical protein, conserved                             | -0,2287 | 0,03125  |
| TcCLB.508737.20  | hypothetical protein                                        | -0,229  | 0,1324   |
| TcCLB.508647.90  | hypothetical protein, conserved                             | -0,2291 | 0,1135   |
| TcCLB.511019.26  | trans-sialidase (pseudogene), putative                      | -0,2292 | 0,1027   |
| TcCLB.511859.180 | proteasome regulatory ATPase subunit 2, putative            | -0,2293 | 0,009392 |
| TcCLB.511283.194 | hypothetical protein, conserved                             | -0,2293 | 0,04991  |
| TcCLB.452895.10  | hypothetical protein, conserved                             | -0,2293 | 0,1335   |
| TcCLB.507949.110 | zeta tubulin, putative                                      | -0,2294 | 0,03525  |
| TcCLB.509797.9   | hypothetical protein, conserved (pseudogene)                | -0,2295 | 0,05319  |
| TcCLB.505999.130 | phosphatidylinositol-4-phosphate 5-kinase related           | -0,2296 | 0,1001   |
| TcCLB.506633.30  | hypothetical protein, conserved                             | -0,2297 | 0,04369  |
| TcCLB.509543.40  | hypothetical protein, conserved                             | -0,2297 | 0,04486  |
| TcCLB.511643.20  | dihydroorotate dehydrogenase, putative (DHODH)              | -0,2297 | 0,0546   |
| TcCLB.506821.120 | hypothetical protein, conserved                             | -0,2297 | 0,0923   |
| TcCLB.506253.30  | hypothetical protein                                        | -0,2297 | 0,4321   |
| TcCLB.504101.40  | trans-sialidase (pseudogene), putative                      | -0,2299 | 0,04088  |
| TcCLB.506581.40  | hypothetical protein, conserved                             | -0,23   | 0,03406  |
| TcCLB.508723.70  | hypothetical protein, conserved                             | -0,2301 | 0,004881 |
| TcCLB.503473.20  | hypothetical protein, conserved                             | -0,2301 | 0,07658  |
| TcCLB.511559.40  | hypothetical protein, conserved                             | -0,2302 | 0,03624  |
| TcCLB.503723.50  | hypothetical protein, conserved                             | -0,2304 | 0,0166   |
| TcCLB.506933.89  | calmodulin, putative                                        | -0,2305 | 0,08695  |
| TcCLB.511647.30  | meiotic recombination protein SPO11, putative               | -0,2305 | 0,2528   |
| TcCLB.506737.100 | hypothetical protein, conserved                             | -0,2306 | 0,06555  |
| TcCLB.509791.50  | bilobe protein, conserved                                   | -0,2307 | 0,04887  |
| TcCLB.509937.190 | hypothetical protein, conserved                             | -0,2308 | 0,02368  |
| TcCLB.511517.20  | hypothetical protein, conserved                             | -0,2308 | 0,04387  |
| TcCLB.510819.10  | Eukaryotic translation initiation factor 4 gamma type 1, pu | -0,2309 | 0,04418  |
| TcCLB.511299.79  | oxidoreductase, putative (fragment)                         | -0,2309 | 0,09923  |
| TcCLB.506295.50  | hypothetical protein, conserved                             | -0,2309 | 0,2107   |
| TcCLB.507877.5   | elongation factor 1-gamma (EF-1-gamma, pseudogene),         | -0,2309 | 0,5494   |
| TcCLB.507945.10  | ATP-dependent RNA helicase, putative                        | -0,2312 | 0,02006  |
| TcCLB.508181.50  | hypothetical protein, conserved                             | -0,2312 | 0,08916  |
| TcCLB.506927.10  | hypothetical protein, conserved (pseudogene)                | -0,2312 | 0,2161   |
| TcCLB.506303.10  | hypothetical protein, conserved                             | -0,2313 | 0,006661 |
| TcCLB.507467.20  | hypothetical protein, conserved                             | -0,2313 | 0,04796  |
| TcCLB.506207.10  | hypothetical protein, conserved                             | -0,2313 | 0,1213   |
| TcCLB.507729.30  | trans-sialidase (pseudogene), putative                      | -0,2314 | 0,2262   |
| TcCLB.509669.100 | hypothetical protein, conserved                             | -0,2315 | 0,06688  |
| TcCLB.508625.70  | mRNA capping methyltransferase, putative                    | -0,2315 | 0,1214   |



|                  |                                                          |         |          |
|------------------|----------------------------------------------------------|---------|----------|
| TcCLB.509247.30  | hypothetical protein, conserved                          | -0,2316 | 0,00513  |
| TcCLB.508707.234 | hypothetical protein, conserved                          | -0,2317 | 0,09715  |
| TcCLB.511381.19  | hypothetical protein, conserved (fragment)               | -0,2319 | 0,03087  |
| TcCLB.430281.10  | retrotransposon hot spot protein (RHS, pseudogene), puta | -0,2321 | 0,3657   |
| TcCLB.503697.100 | hypothetical protein, conserved                          | -0,2322 | 0,009833 |
| TcCLB.509579.30  | retrotransposon hot spot protein (RHS, pseudogene), puta | -0,2322 | 0,07712  |
| TcCLB.508709.10  | hypothetical protein, conserved                          | -0,2322 | 0,1286   |
| TcCLB.506935.10  | hypothetical protein, conserved                          | -0,2325 | 0,02064  |
| TcCLB.510329.280 | protein farnesyltransferase alpha subunit, putative      | -0,2326 | 0,01417  |
| TcCLB.509561.39  | hypothetical protein, conserved                          | -0,2326 | 0,0555   |
| TcCLB.508461.270 | rab7 GTP binding protein, putative                       | -0,2327 | 0,006778 |
| TcCLB.508737.194 | ARP2/3 complex subunit, putative                         | -0,2327 | 0,1069   |
| TcCLB.508173.90  | hypothetical protein, conserved                          | -0,2327 | 0,1203   |
| TcCLB.503803.20  | hypothetical protein, conserved                          | -0,2327 | 0,1292   |
| TcCLB.506605.80  | hypothetical protein, conserved                          | -0,2329 | 0,054    |
| TcCLB.510517.50  | hypothetical protein, conserved                          | -0,2331 | 0,01668  |
| TcCLB.509875.250 | hypothetical protein, conserved                          | -0,2333 | 0,08551  |
| TcCLB.511199.9   | ATP-dependent RNA helicase FAL1, putative (fragment)     | -0,2334 | 0,1363   |
| TcCLB.506727.20  | hypothetical protein, conserved                          | -0,2335 | 0,02534  |
| TcCLB.416041.14  | trans-sialidase, putative (fragment)                     | -0,2335 | 0,03614  |
| TcCLB.507967.4   | hypothetical protein, conserved                          | -0,2335 | 0,171    |
| TcCLB.507001.4   | hypothetical protein, conserved                          | -0,2336 | 0,3227   |
| TcCLB.506691.60  | hypothetical protein, conserved                          | -0,2337 | 0,1075   |
| TcCLB.511903.70  | hypothetical protein, conserved                          | -0,2337 | 0,1231   |
| TcCLB.506559.510 | hypothetical protein, conserved                          | -0,2337 | 0,1321   |
| TcCLB.503513.20  | hypothetical protein                                     | -0,2338 | 0,08998  |
| TcCLB.506979.59  | hypothetical protein, conserved                          | -0,2339 | 0,1215   |
| TcCLB.510575.30  | hypothetical protein, conserved                          | -0,234  | 0,03577  |
| TcCLB.506737.50  | hypothetical protein, conserved                          | -0,2342 | 0,08705  |
| TcCLB.506767.310 | trans-sialidase (pseudogene), putative                   | -0,2342 | 0,259    |
| TcCLB.507099.40  | hypothetical protein, conserved                          | -0,2343 | 0,001025 |
| TcCLB.509567.4   | hypothetical protein, conserved                          | -0,2343 | 0,06613  |
| TcCLB.422867.20  | retrotransposon hot spot protein (RHS, pseudogene), puta | -0,2343 | 0,06933  |
| TcCLB.506195.250 | hypothetical protein, conserved                          | -0,2344 | 0,02926  |
| TcCLB.469785.20  | hypothetical protein, conserved                          | -0,2345 | 0,1442   |
| TcCLB.506559.484 | hypothetical protein, conserved                          | -0,2345 | 0,1461   |
| TcCLB.511577.180 | retrotransposon hot spot (RHS) protein, putative         | -0,2346 | 0,06234  |
| TcCLB.506863.70  | hypothetical protein, conserved                          | -0,2347 | 0,01516  |
| TcCLB.508213.30  | hypothetical protein                                     | -0,2347 | 0,08402  |
| TcCLB.507601.120 | hypothetical protein, conserved                          | -0,235  | 0,1152   |
| TcCLB.506201.154 | hypothetical protein, conserved                          | -0,235  | 0,1236   |
| TcCLB.511927.10  | hypothetical protein, conserved                          | -0,235  | 0,2263   |
| TcCLB.452283.4   | hypothetical protein, conserved                          | -0,2351 | 0,4276   |
| TcCLB.506661.70  | hypothetical protein, conserved                          | -0,2352 | 0,09456  |
| TcCLB.511229.120 | hypothetical protein                                     | -0,2352 | 0,1069   |

|                  |                                                              |         |          |
|------------------|--------------------------------------------------------------|---------|----------|
| TcCLB.511145.49  | GPI transamidase component GAA1, putative                    | -0,2353 | 0,02973  |
| TcCLB.503675.20  | Charged multivesicular body protein 3, putative              | -0,2354 | 0,08656  |
| TcCLB.504171.10  | hypothetical protein, conserved                              | -0,2354 | 0,08854  |
| TcCLB.508387.160 | MORN repeat-containing protein                               | -0,2355 | 0,1057   |
| TcCLB.504081.500 | mucin TcMUCII, putative                                      | -0,2355 | 0,6106   |
| TcCLB.506857.40  | hypothetical protein, conserved                              | -0,2357 | 0,1023   |
| TcCLB.508461.120 | hypothetical protein, conserved                              | -0,2359 | 0,005242 |
| TcCLB.507213.20  | protein kinase, putative                                     | -0,2359 | 0,04696  |
| TcCLB.510259.30  | hypothetical protein, conserved                              | -0,2359 | 0,1203   |
| TcCLB.507715.90  | hypothetical protein, conserved                              | -0,2361 | 0,008981 |
| TcCLB.509157.260 | hypothetical protein                                         | -0,2361 | 0,0713   |
| TcCLB.507765.120 | hypothetical protein, conserved                              | -0,2364 | 0,009113 |
| TcCLB.511303.130 | hypothetical protein                                         | -0,2365 | 0,03747  |
| TcCLB.509011.100 | myosin heavy chain kinase A, putative                        | -0,2366 | 0,0328   |
| TcCLB.506855.170 | hypothetical protein, conserved                              | -0,2366 | 0,1589   |
| TcCLB.507017.130 | hypothetical protein                                         | -0,2366 | 0,1945   |
| TcCLB.508153.590 | hypothetical protein, conserved                              | -0,2367 | 0,06846  |
| TcCLB.511543.20  | As/Sb Reductase, putative (ACR2)                             | -0,2368 | 0,1925   |
| TcCLB.509521.84  | retrotransposon hot spot protein (RHS, pseudogene), puta     | -0,2368 | 0,3889   |
| TcCLB.506467.20  | hypothetical protein, conserved                              | -0,2369 | 0,02099  |
| TcCLB.510329.260 | hypothetical protein, conserved                              | -0,237  | 0,001943 |
| TcCLB.510403.89  | synaptojanin (N-terminal domain), putative                   | -0,237  | 0,0427   |
| TcCLB.510381.60  | proliferator-activated receptor-interacting protein (PRIP) i | -0,2372 | 0,09069  |
| TcCLB.510121.170 | cysteine peptidase, Clan CA, family C2, putative             | -0,2374 | 0,001098 |
| TcCLB.484299.4   | ATP-dependent DEAD/H RNA helicase, putative                  | -0,2374 | 0,3182   |
| TcCLB.511127.110 | ATP-dependent protease ATPase subunit HslU2 (HslU2)          | -0,2375 | 0,003408 |
| TcCLB.510565.179 | hypothetical protein, conserved                              | -0,2376 | 0,006663 |
| TcCLB.511911.150 | nucleotide-binding protein, putative                         | -0,2378 | 0,1224   |
| TcCLB.511729.70  | cationic amino acid transporter, putative                    | -0,2378 | 0,1556   |
| TcCLB.506443.130 | trans-sialidase (pseudogene), putative                       | -0,238  | 0,03102  |
| TcCLB.508957.14  | hypothetical protein, conserved (fragment)                   | -0,2381 | 0,0764   |
| TcCLB.508119.40  | hypothetical protein                                         | -0,2381 | 0,4641   |
| TcCLB.503841.40  | actin, putative                                              | -0,2382 | 0,06094  |
| TcCLB.508693.84  | hypothetical protein, conserved                              | -0,2383 | 0,07751  |
| TcCLB.507993.30  | hypothetical protein, conserved                              | -0,2385 | 0,02589  |
| TcCLB.503803.4   | serine/threonine protein phosphatase 2A regulatory subu      | -0,2385 | 0,1829   |
| TcCLB.511711.50  | hypothetical protein, conserved                              | -0,2386 | 0,05148  |
| TcCLB.510657.20  | ubiquitin hydrolase, putative                                | -0,2388 | 0,09854  |
| TcCLB.508405.119 | hypothetical protein, conserved                              | -0,2388 | 0,3474   |
| TcCLB.503785.10  | hypothetical protein, conserved (pseudogene)                 | -0,2389 | 0,03745  |
| TcCLB.511585.140 | hypothetical protein, conserved                              | -0,2391 | 0,006214 |
| TcCLB.511003.10  | phospholipid-translocating ATPase, putative                  | -0,2392 | 0,01705  |
| TcCLB.509799.40  | hypothetical protein, conserved                              | -0,2393 | 0,03113  |
| TcCLB.509767.30  | hypothetical protein                                         | -0,2393 | 0,03647  |
| TcCLB.508943.20  | protein kinase, putative                                     | -0,2394 | 0,1027   |

|                  |                                                          |         |          |
|------------------|----------------------------------------------------------|---------|----------|
| TcCLB.510545.60  | hypothetical protein, conserved (pseudogene)             | -0,2394 | 0,5458   |
| TcCLB.511717.100 | hypothetical protein, conserved                          | -0,2395 | 0,02857  |
| TcCLB.508153.670 | hypothetical protein, conserved                          | -0,2395 | 0,2456   |
| TcCLB.511529.90  | enolase, putative                                        | -0,2396 | 0,08168  |
| TcCLB.509003.20  | calpain-like cysteine peptidase, putative                | -0,2396 | 0,1137   |
| TcCLB.506409.230 | hypothetical protein, conserved                          | -0,2397 | 0,04687  |
| TcCLB.506559.250 | hypothetical protein, conserved                          | -0,2397 | 0,04871  |
| TcCLB.503929.70  | hypothetical protein, conserved                          | -0,2397 | 0,07211  |
| TcCLB.508543.110 | hypothetical protein, conserved                          | -0,2398 | 0,03648  |
| TcCLB.510181.69  | hypothetical protein, conserved                          | -0,2399 | 0,04974  |
| TcCLB.508387.10  | hypothetical protein, conserved                          | -0,2399 | 0,2012   |
| TcCLB.507023.200 | queuine tRNA-ribosyltransferase, putative                | -0,24   | 0,03043  |
| TcCLB.511299.70  | mitogen-activated protein kinase, putative               | -0,2401 | 0,02783  |
| TcCLB.511865.70  | hypothetical protein, conserved                          | -0,2401 | 0,05505  |
| TcCLB.506509.20  | hypothetical protein, conserved                          | -0,2401 | 0,1121   |
| TcCLB.506457.120 | hypothetical protein, conserved                          | -0,2402 | 0,03256  |
| TcCLB.503619.29  | hypothetical protein, conserved                          | -0,2402 | 0,1815   |
| TcCLB.511099.140 | mucin-associated surface protein (MASP), putative        | -0,2402 | 0,6801   |
| TcCLB.509879.10  | hypothetical protein, conserved                          | -0,2403 | 0,1274   |
| TcCLB.506929.10  | surface protease GP63, putative                          | -0,2404 | 0,02638  |
| TcCLB.508145.49  | hypothetical protein, conserved                          | -0,2405 | 0,01973  |
| TcCLB.507623.30  | hypothetical protein, conserved                          | -0,2407 | 0,01117  |
| TcCLB.503583.40  | trans-splicing factor, putative                          | -0,2407 | 0,03598  |
| TcCLB.505071.100 | phosphatidylglycerolphosphate synthase, mitochondrial, p | -0,2408 | 0,02001  |
| TcCLB.504827.100 | hypothetical protein, conserved                          | -0,2408 | 0,05271  |
| TcCLB.511851.44  | mucin-associated surface protein (MASP, pseudogene), pi  | -0,2409 | 0,007771 |
| TcCLB.504179.60  | hypothetical protein, conserved                          | -0,241  | 0,01869  |
| TcCLB.511923.71  | hypothetical protein, conserved (pseudogene)             | -0,241  | 0,358    |
| TcCLB.508741.290 | ribosomal RNA methyltransferase, putative                | -0,2411 | 0,0114   |
| TcCLB.508241.40  | hypothetical protein                                     | -0,2411 | 0,01247  |
| TcCLB.511367.50  | hypothetical protein, conserved                          | -0,2414 | 0,02406  |
| TcCLB.506563.220 | calpain-like cysteine peptidase, putative                | -0,2415 | 0,006262 |
| TcCLB.508837.160 | hypothetical protein, conserved                          | -0,2415 | 0,02614  |
| TcCLB.511903.20  | hypothetical protein, conserved                          | -0,2415 | 0,1521   |
| TcCLB.510659.170 | denn domain-containing protein                           | -0,2416 | 0,05266  |
| TcCLB.506173.20  | hypothetical protein                                     | -0,2416 | 0,1048   |
| TcCLB.508933.5   | serine/threonine protein phosphatase PP1 (fragment)      | -0,2417 | 0,206    |
| TcCLB.511529.9   | hypothetical protein, conserved                          | -0,242  | 0,01521  |
| TcCLB.511153.130 | DNA-direcetd RNA polymerase II, subunit 9, putative      | -0,2421 | 0,1118   |
| TcCLB.504057.21  | hypothetical protein, conserved                          | -0,2422 | 0,0477   |
| TcCLB.511277.554 | hypothetical protein, conserved                          | -0,2422 | 0,07226  |
| TcCLB.510657.70  | hypothetical protein, conserved (pseudogene)             | -0,2423 | 0,1349   |
| TcCLB.506509.60  | hypothetical protein, conserved                          | -0,2423 | 0,1392   |
| TcCLB.506097.9   | dynein heavy chain, putative (fragment)                  | -0,2424 | 0,06886  |
| TcCLB.508647.250 | phosphotransferase, putative                             | -0,2426 | 0,005217 |

|                  |                                                            |         |          |
|------------------|------------------------------------------------------------|---------|----------|
| TcCLB.510187.220 | hypothetical protein, conserved                            | -0,2427 | 0,0704   |
| TcCLB.506127.100 | hypothetical protein, conserved                            | -0,2427 | 0,08761  |
| TcCLB.506803.14  | hypothetical protein                                       | -0,2427 | 0,1134   |
| TcCLB.505999.60  | hypothetical protein                                       | -0,2427 | 0,1768   |
| TcCLB.508539.10  | hypothetical protein, conserved                            | -0,2428 | 0,3552   |
| TcCLB.508725.4   | hypothetical protein, conserved                            | -0,2429 | 0,06564  |
| TcCLB.508977.31  | elongation factor 1-gamma (EF-1-gamma, pseudogene),        | -0,2431 | 0,3761   |
| TcCLB.508045.60  | hypothetical protein, conserved                            | -0,2433 | 0,006578 |
| TcCLB.509561.9   | hypothetical protein, conserved                            | -0,2433 | 0,1297   |
| TcCLB.508879.190 | hypothetical protein, conserved                            | -0,2434 | 0,03012  |
| TcCLB.510265.40  | hypothetical protein, conserved                            | -0,2435 | 0,004179 |
| TcCLB.509611.70  | hypothetical protein, conserved                            | -0,2435 | 0,1046   |
| TcCLB.511555.90  | acyl-CoA binding protein, putative                         | -0,2436 | 0,02006  |
| TcCLB.507733.10  | trans-sialidase (pseudogene), putative                     | -0,2436 | 0,2498   |
| TcCLB.504741.100 | hypothetical protein, conserved                            | -0,2437 | 0,008375 |
| TcCLB.509399.70  | hypothetical protein, conserved                            | -0,2437 | 0,02441  |
| TcCLB.511907.300 | DNA repair and transcription factor protein, putative      | -0,2438 | 0,04424  |
| TcCLB.509455.60  | hypothetical protein, conserved                            | -0,2438 | 0,04509  |
| TcCLB.508839.89  | DNA-directed rna polymerase I largest subunit, putative (f | -0,244  | 0,03941  |
| TcCLB.507499.90  | trans-sialidase (pseudogene), putative                     | -0,244  | 0,06459  |
| TcCLB.509967.3   | hypothetical protein, conserved (pseudogene)               | -0,244  | 0,2381   |
| TcCLB.507641.100 | hypothetical protein, conserved                            | -0,2441 | 0,01237  |
| TcCLB.507089.190 | hypothetical protein, conserved                            | -0,2441 | 0,01736  |
| TcCLB.506337.180 | hypothetical protein, conserved                            | -0,2442 | 0,01268  |
| TcCLB.507073.10  | hypothetical protein, conserved                            | -0,2442 | 0,01858  |
| TcCLB.506727.70  | hypothetical protein, conserved                            | -0,2443 | 0,02742  |
| TcCLB.509455.30  | hypothetical protein, conserved                            | -0,2445 | 0,07515  |
| TcCLB.508479.280 | hypothetical protein, conserved                            | -0,2446 | 0,05497  |
| TcCLB.511401.111 | elongation factor 1-gamma (EF-1-gamma, pseudogene),        | -0,2446 | 0,1676   |
| TcCLB.506793.70  | hypothetical protein, conserved                            | -0,2448 | 0,008181 |
| TcCLB.507753.6   | hypothetical protein, conserved (pseudogene)               | -0,2448 | 0,2417   |
| TcCLB.511801.14  | protein kinase, putative (LDK)                             | -0,2449 | 0,02366  |
| TcCLB.504045.10  | hypothetical protein, conserved                            | -0,245  | 0,01244  |
| TcCLB.508909.330 | protein kinase, putative                                   | -0,245  | 0,01394  |
| TcCLB.508675.50  | hypothetical protein, conserved                            | -0,2451 | 0,01098  |
| TcCLB.505997.21  | N-acetyltransferase complex ARD1 subunit (pseudogene),     | -0,2451 | 0,5317   |
| TcCLB.510609.130 | hypothetical protein, conserved                            | -0,2453 | 0,02769  |
| TcCLB.508545.9   | hypothetical protein, conserved                            | -0,2453 | 0,1951   |
| TcCLB.510543.200 | trans-sialidase (pseudogene), putative                     | -0,2453 | 0,3779   |
| TcCLB.508579.30  | kinesin, putative                                          | -0,2455 | 0,05175  |
| TcCLB.507005.80  | hypothetical protein, conserved                            | -0,2455 | 0,1247   |
| TcCLB.505807.230 | hypothetical protein                                       | -0,2456 | 0,1614   |
| TcCLB.507805.30  | hypothetical protein, conserved (pseudogene)               | -0,2457 | 0,2444   |
| TcCLB.506227.20  | hypothetical protein, conserved                            | -0,2458 | 0,1438   |
| TcCLB.511859.10  | AMP deaminase, putative                                    | -0,2458 | 0,2712   |

|                  |                                                           |         |          |
|------------------|-----------------------------------------------------------|---------|----------|
| TcCLB.510327.10  | hypothetical protein                                      | -0,2461 | 0,3929   |
| TcCLB.506419.40  | hypothetical protein, conserved                           | -0,2462 | 0,005359 |
| TcCLB.503789.60  | hypothetical protein, conserved                           | -0,2464 | 0,04462  |
| TcCLB.510247.20  | casein kinase I, putative                                 | -0,2465 | 0,3319   |
| TcCLB.509999.30  | hypothetical protein, conserved                           | -0,2466 | 0,06271  |
| TcCLB.510669.30  | hypothetical protein, conserved                           | -0,2467 | 0,01467  |
| TcCLB.503407.20  | SUMO1/Ulp2, putative                                      | -0,2467 | 0,0213   |
| TcCLB.506839.14  | hypothetical protein, conserved                           | -0,2467 | 0,03216  |
| TcCLB.507881.90  | trans-sialidase (pseudogene), putative                    | -0,2467 | 0,09573  |
| TcCLB.419703.10  | hypothetical protein                                      | -0,2468 | 0,2336   |
| TcCLB.503885.40  | hypothetical protein, conserved                           | -0,2471 | 0,05689  |
| TcCLB.509591.60  | phospholipid-transporting ATPase 1-like protein, putative | -0,2473 | 0,5503   |
| TcCLB.506195.25  | hypothetical protein, conserved                           | -0,2474 | 0,3405   |
| TcCLB.508181.30  | hypothetical protein, conserved                           | -0,2475 | 0,001296 |
| TcCLB.511239.150 | histone acetyltransferase, putative                       | -0,2479 | 0,03351  |
| TcCLB.503813.30  | hypothetical protein, conserved                           | -0,248  | 0,06513  |
| TcCLB.508109.14  | mucin TcMUCII, putative                                   | -0,248  | 0,4552   |
| TcCLB.503809.130 | hypothetical protein, conserved                           | -0,2481 | 0,03181  |
| TcCLB.511031.30  | hypothetical protein, conserved                           | -0,2482 | 0,05131  |
| TcCLB.506201.160 | hypothetical protein, conserved                           | -0,2482 | 0,234    |
| TcCLB.509007.40  | hypothetical protein, conserved                           | -0,2482 | 0,6938   |
| TcCLB.506221.80  | NAD synthase, putative                                    | -0,2483 | 0,08509  |
| TcCLB.506459.215 | hypothetical protein, conserved (pseudogene)              | -0,2484 | 0,4709   |
| TcCLB.508879.30  | dynein heavy chain, putative                              | -0,2486 | 0,001585 |
| TcCLB.509205.40  | hypothetical protein, conserved                           | -0,2486 | 0,05914  |
| TcCLB.510835.50  | hypothetical protein, conserved                           | -0,2488 | 0,06745  |
| TcCLB.509831.5   | vesicular transport protein (CDC48 homologue), putative ( | -0,2489 | 0,09353  |
| TcCLB.509747.30  | hypothetical protein, conserved                           | -0,249  | 0,004136 |
| TcCLB.504147.224 | RNA-editing-associated protein 1, putative (REAP-1)       | -0,249  | 0,03642  |
| TcCLB.506791.10  | CYC2-like cyclin 4, putative (CYC4)                       | -0,2491 | 0,01671  |
| TcCLB.495369.10  | hypothetical protein, conserved (fragment)                | -0,2491 | 0,08568  |
| TcCLB.506677.4   | hypothetical protein, conserved                           | -0,2492 | 0,4675   |
| TcCLB.510181.80  | hypothetical protein, conserved                           | -0,2493 | 0,02797  |
| TcCLB.507017.150 | AUT2/APG4/ATG4 cysteine peptidase, putative               | -0,2493 | 0,04619  |
| TcCLB.511239.159 | inosine-guanine nucleoside hydrolase, putative            | -0,2493 | 0,4172   |
| TcCLB.509429.240 | hypothetical protein, conserved                           | -0,2494 | 0,017    |
| TcCLB.506705.60  | hypothetical protein, conserved                           | -0,2496 | 0,0107   |
| TcCLB.510565.170 | hypothetical protein, conserved                           | -0,2498 | 0,4483   |
| TcCLB.507883.90  | adenylate kinase, putative                                | -0,2501 | 0,08215  |
| TcCLB.507517.100 | pseudouridylate synthase I, putative                      | -0,2502 | 0,04806  |
| TcCLB.511921.130 | hypothetical protein, conserved (pseudogene)              | -0,2503 | 0,3088   |
| TcCLB.510519.20  | hypothetical protein, conserved                           | -0,2504 | 0,04779  |
| TcCLB.507975.50  | trans-sialidase (pseudogene), putative                    | -0,2505 | 0,001596 |
| TcCLB.504217.4   | hypothetical protein, conserved (fragment)                | -0,2506 | 0,1374   |
| TcCLB.506195.240 | hypothetical protein, conserved                           | -0,2507 | 0,01058  |

|                  |                                                        |         |           |
|------------------|--------------------------------------------------------|---------|-----------|
| TcCLB.511875.64  | hypothetical protein, conserved (pseudogene)           | -0,2507 | 0,1553    |
| TcCLB.506559.20  | hypothetical protein, conserved                        | -0,2508 | 0,00695   |
| TcCLB.510287.10  | dynein light chain, putative                           | -0,2508 | 0,05937   |
| TcCLB.509807.20  | hypothetical protein, conserved                        | -0,2509 | 0,02292   |
| TcCLB.508445.90  | hypothetical protein, conserved                        | -0,2509 | 0,02459   |
| TcCLB.510729.20  | hypothetical protein, conserved                        | -0,251  | 0,02956   |
| TcCLB.508307.140 | hypothetical protein, conserved                        | -0,251  | 0,03321   |
| TcCLB.509065.30  | hypothetical protein, conserved                        | -0,2511 | 0,0155    |
| TcCLB.506739.60  | hypothetical protein, conserved                        | -0,2513 | 0,01857   |
| TcCLB.508647.260 | hypothetical protein, conserved                        | -0,2513 | 0,04196   |
| TcCLB.510431.340 | hypothetical protein, conserved                        | -0,2513 | 0,1073    |
| TcCLB.511603.40  | hypothetical protein                                   | -0,2513 | 0,496     |
| TcCLB.508445.70  | hypothetical protein, conserved                        | -0,2514 | 0,01624   |
| TcCLB.508461.200 | hypothetical protein, conserved                        | -0,2514 | 0,03196   |
| TcCLB.506321.260 | hypothetical protein, conserved                        | -0,2514 | 0,1008    |
| TcCLB.506425.70  | hypothetical protein, conserved                        | -0,2516 | 0,01007   |
| TcCLB.507017.80  | hypothetical protein                                   | -0,2516 | 0,09159   |
| TcCLB.507689.10  | dihydrouridine synthase (Dus, pseudogene), putative    | -0,2516 | 0,2068    |
| TcCLB.510999.30  | hypothetical protein, conserved                        | -0,2517 | 0,02976   |
| TcCLB.509215.16  | GlcNAc-PI synthesis protein (GPI3)                     | -0,2517 | 0,07879   |
| TcCLB.510279.130 | mucin TcMUCII, putative                                | -0,2517 | 0,5743    |
| TcCLB.511481.60  | RNA helicase, putative                                 | -0,2519 | 0,0009456 |
| TcCLB.510525.120 | hypothetical protein, conserved                        | -0,252  | 0,04583   |
| TcCLB.511285.40  | hypothetical protein, conserved                        | -0,252  | 0,08099   |
| TcCLB.506247.140 | hypothetical protein, conserved                        | -0,2521 | 0,01101   |
| TcCLB.507669.120 | ATPase domain protein, putative                        | -0,2521 | 0,03028   |
| TcCLB.508415.20  | hypothetical protein, conserved                        | -0,2522 | 0,01668   |
| TcCLB.508277.210 | hypothetical protein, conserved                        | -0,2522 | 0,02282   |
| TcCLB.508607.10  | retrotransposon hot spot (RHS) protein, putative       | -0,2522 | 0,4418    |
| TcCLB.511307.10  | kinesin, putative                                      | -0,2523 | 0,02559   |
| TcCLB.504777.40  | mucin TcMUCII, putative                                | -0,2523 | 0,1815    |
| TcCLB.507163.20  | hypothetical protein                                   | -0,2523 | 0,4418    |
| TcCLB.507715.30  | transcription elongation factor-like protein, putative | -0,2524 | 0,01159   |
| TcCLB.508461.540 | hypothetical protein, conserved                        | -0,2524 | 0,03579   |
| TcCLB.507049.66  | hypothetical protein                                   | -0,2524 | 0,1359    |
| TcCLB.426897.4   | hypothetical protein, conserved (fragment)             | -0,2524 | 0,2091    |
| TcCLB.509267.100 | methionyl-tRNA formyltransferase, putative             | -0,2527 | 0,04941   |
| TcCLB.504507.20  | DNA replication licensing factor MCM8, putative        | -0,2527 | 0,1875    |
| TcCLB.510231.29  | multidrug resistance-associated protein, putative      | -0,2529 | 0,01495   |
| TcCLB.510879.130 | hypothetical protein, conserved                        | -0,2529 | 0,04721   |
| TcCLB.510895.29  | hypothetical protein, conserved                        | -0,2531 | 0,1741    |
| TcCLB.507031.110 | hypothetical protein, conserved                        | -0,2533 | 0,009071  |
| TcCLB.504179.9   | pre-mRNA splicing factor ATP-dependent RNA helicase, p | -0,2533 | 0,1145    |
| TcCLB.507747.195 | glyceraldehyde-3-phosphate dehydrogenase (pseudogene)  | -0,2533 | 0,2362    |
| TcCLB.508151.10  | mucin TcMUCII, putative                                | -0,2533 | 0,3766    |

|                  |                                                          |         |           |
|------------------|----------------------------------------------------------|---------|-----------|
| TcCLB.504787.47  | elongation factor 1-gamma (EF-1-gamma, pseudogene),      | -0,2535 | 0,5974    |
| TcCLB.509487.20  | hypothetical protein, conserved                          | -0,2536 | 0,03216   |
| TcCLB.506445.10  | actin-like protein, putative                             | -0,2536 | 0,07144   |
| TcCLB.434945.10  | hypothetical protein, conserved                          | -0,2536 | 0,3227    |
| TcCLB.508325.101 | hypothetical protein, conserved                          | -0,2536 | 0,4287    |
| TcCLB.506443.80  | synaptojanin (N-terminal domain), putative               | -0,254  | 0,007351  |
| TcCLB.506517.158 | hypothetical protein, conserved                          | -0,254  | 0,05641   |
| TcCLB.507539.49  | hypothetical protein, conserved                          | -0,254  | 0,2267    |
| TcCLB.511529.250 | hypothetical protein                                     | -0,2541 | 0,02304   |
| TcCLB.503897.60  | hypothetical protein, conserved                          | -0,2541 | 0,03693   |
| TcCLB.511545.140 | hypothetical protein, conserved                          | -0,2542 | 0,03291   |
| TcCLB.507059.30  | retrotransposon hot spot protein (RHS, pseudogene), puta | -0,2542 | 0,06441   |
| TcCLB.507739.120 | amastin, putative                                        | -0,2543 | 0,3568    |
| TcCLB.511755.90  | hypothetical protein, conserved                          | -0,2544 | 0,0164    |
| TcCLB.506203.90  | hypothetical protein, conserved                          | -0,2545 | 0,009908  |
| TcCLB.506703.100 | mucin TcMUCII (pseudogene), putative                     | -0,2545 | 0,6162    |
| TcCLB.511837.10  | vesicle-associated membrane protein, putative            | -0,2546 | 0,02875   |
| TcCLB.509001.20  | hypothetical protein, conserved                          | -0,2549 | 0,007015  |
| TcCLB.510421.90  | protein kinase, putative                                 | -0,2549 | 0,01649   |
| TcCLB.504019.3   | hypothetical protein (fragment)                          | -0,255  | 0,1305    |
| TcCLB.507007.45  | anaphase promoting complex subunit protein, putative     | -0,2551 | 0,3563    |
| TcCLB.444777.20  | hypothetical protein, conserved                          | -0,2552 | 0,01943   |
| TcCLB.506559.240 | hypothetical protein, conserved                          | -0,2553 | 0,00612   |
| TcCLB.509789.59  | hypothetical protein, conserved                          | -0,2554 | 0,0046    |
| TcCLB.508831.140 | surface antigen 2 (CA-2), putative                       | -0,2554 | 0,02167   |
| TcCLB.510091.90  | hypothetical protein, conserved                          | -0,2555 | 0,005455  |
| TcCLB.503449.30  | clathrin coat assembly protein, putative                 | -0,2555 | 0,01327   |
| TcCLB.507681.180 | hypothetical protein, conserved                          | -0,2555 | 0,06323   |
| TcCLB.508163.310 | mucin TcMUCII, putative                                  | -0,2555 | 0,1809    |
| TcCLB.504033.210 | hypothetical protein, conserved                          | -0,2557 | 0,2033    |
| TcCLB.510303.180 | hypothetical protein, conserved                          | -0,2558 | 0,0003165 |
| TcCLB.511511.50  | hypothetical protein, conserved                          | -0,2558 | 0,02356   |
| TcCLB.507159.20  | hypothetical protein, conserved                          | -0,2558 | 0,04054   |
| TcCLB.503953.30  | protein kinase, putative                                 | -0,2559 | 0,02683   |
| TcCLB.511877.30  | surface protease GP63 (pseudogene), putative             | -0,2561 | 0,2356    |
| TcCLB.508277.180 | mismatch repair protein MSH3, putative                   | -0,2566 | 0,001932  |
| TcCLB.511851.30  | trans-sialidase (pseudogene), putative                   | -0,2566 | 0,04122   |
| TcCLB.508417.20  | hypothetical protein                                     | -0,2568 | 0,4332    |
| TcCLB.503409.10  | hypothetical protein, conserved                          | -0,2569 | 0,09547   |
| TcCLB.511217.100 | hypothetical protein, conserved                          | -0,257  | 0,01198   |
| TcCLB.507515.140 | oxysterol-binding protein, putative                      | -0,2571 | 0,01952   |
| TcCLB.508075.7   | hypothetical protein, conserved                          | -0,2571 | 0,1148    |
| TcCLB.509647.100 | hypothetical protein, conserved                          | -0,2572 | 0,04569   |
| TcCLB.506315.100 | protein phosphatase 2C, putative                         | -0,2573 | 0,01254   |
| TcCLB.507053.190 | hypothetical protein, conserved                          | -0,2574 | 0,02335   |

|                  |                                                           |         |           |
|------------------|-----------------------------------------------------------|---------|-----------|
| TcCLB.508303.20  | hypothetical protein                                      | -0,2575 | 0,05532   |
| TcCLB.506131.161 | trans-sialidase (pseudogene), putative                    | -0,2576 | 0,3833    |
| TcCLB.511531.9   | chaperone DNAJ protein, putative                          | -0,2579 | 0,07111   |
| TcCLB.511393.79  | hypothetical protein, conserved                           | -0,2582 | 0,02738   |
| TcCLB.511183.300 | trans-sialidase (pseudogene), putative                    | -0,2584 | 0,5265    |
| TcCLB.511321.50  | hypothetical protein, conserved                           | -0,2585 | 0,0073    |
| TcCLB.506473.20  | DnaJ chaperone protein, putative                          | -0,2585 | 0,009534  |
| TcCLB.509011.90  | lipase, putative                                          | -0,2585 | 0,09276   |
| TcCLB.507625.120 | hypothetical protein, conserved                           | -0,2585 | 0,1392    |
| TcCLB.506859.130 | hypothetical protein, conserved                           | -0,2588 | 0,2625    |
| TcCLB.508707.10  | amino acid transporter, putative                          | -0,259  | 0,2281    |
| TcCLB.509315.20  | trans-sialidase (pseudogene), putative                    | -0,2591 | 0,4394    |
| TcCLB.509407.10  | hypothetical protein                                      | -0,2593 | 0,2072    |
| TcCLB.508307.120 | hypothetical protein, conserved                           | -0,2595 | 0,002452  |
| TcCLB.510737.40  | transport protein particle (TRAPP) subunit, putative      | -0,2595 | 0,05061   |
| TcCLB.504109.174 | hypothetical protein, conserved                           | -0,2596 | 0,04654   |
| TcCLB.508715.10  | oxidoreductase, putative (fragment)                       | -0,2596 | 0,1031    |
| TcCLB.510967.13  | hypothetical protein, conserved                           | -0,2596 | 0,1829    |
| TcCLB.506511.50  | hypothetical protein, conserved                           | -0,2597 | 0,0006376 |
| TcCLB.511545.70  | kinteoplast poly(A) polymerase complex 1 subunit, putativ | -0,2597 | 0,00209   |
| TcCLB.511491.9   | hypothetical protein, conserved                           | -0,2597 | 0,1345    |
| TcCLB.506959.110 | hypothetical protein, conserved                           | -0,2599 | 0,01484   |
| TcCLB.509693.160 | hypothetical protein, conserved                           | -0,26   | 0,02669   |
| TcCLB.511115.20  | GTP-binding elongation factor Tu family, putative         | -0,2602 | 0,002609  |
| TcCLB.509985.20  | hypothetical protein, conserved                           | -0,2603 | 0,02132   |
| TcCLB.503869.30  | hypothetical protein, conserved                           | -0,2604 | 0,00526   |
| TcCLB.508817.110 | hypothetical protein, conserved                           | -0,2605 | 0,05637   |
| TcCLB.506435.100 | hypothetical protein, conserved                           | -0,2605 | 0,1344    |
| TcCLB.511171.50  | mucin-associated surface protein (MASP, pseudogene), pi   | -0,2605 | 0,3697    |
| TcCLB.510889.20  | hypothetical protein, conserved                           | -0,2606 | 0,0397    |
| TcCLB.509591.10  | ubiquitin-conjugating enzyme, putative                    | -0,2606 | 0,08484   |
| TcCLB.504001.6   | protein kinase, putative                                  | -0,2607 | 0,01694   |
| TcCLB.511017.69  | histone acetyltransferase, putative (fragment)            | -0,2607 | 0,2564    |
| TcCLB.504071.50  | spliceosome-associated protein, putative                  | -0,2608 | 0,007458  |
| TcCLB.509805.120 | hypothetical protein, conserved                           | -0,2609 | 0,08807   |
| TcCLB.507007.37  | hypothetical protein, conserved                           | -0,261  | 0,5039    |
| TcCLB.509161.20  | hypothetical protein, conserved                           | -0,2611 | 0,06802   |
| TcCLB.507923.30  | vacuolar assembly protein vps41, putative                 | -0,2612 | 0,005156  |
| TcCLB.511045.40  | subtilisin peptidase                                      | -0,2612 | 0,007686  |
| TcCLB.508899.130 | hypothetical protein, conserved                           | -0,2612 | 0,1069    |
| TcCLB.504149.70  | hypothetical protein, conserved                           | -0,2613 | 0,03258   |
| TcCLB.508325.80  | trans-sialidase (pseudogene), putative                    | -0,2614 | 0,01157   |
| TcCLB.506163.10  | surface protease GP63, putative                           | -0,2614 | 0,02398   |
| TcCLB.503759.59  | hypothetical protein, conserved                           | -0,2614 | 0,04297   |
| TcCLB.509551.80  | hypothetical protein, conserved                           | -0,2614 | 0,06248   |



|                  |                                                            |         |          |
|------------------|------------------------------------------------------------|---------|----------|
| TcCLB.507089.80  | exosome-associated protein 2, putative (EAP2)              | -0,2615 | 0,05294  |
| TcCLB.506531.9   | hypothetical protein (fragment)                            | -0,2615 | 0,07183  |
| TcCLB.503823.70  | hypothetical protein, conserved                            | -0,2615 | 0,1452   |
| TcCLB.507071.277 | syntaxin binding protein (pseudogene), putative            | -0,2615 | 0,4708   |
| TcCLB.506565.8   | RNA-binding protein, putative                              | -0,2616 | 0,004703 |
| TcCLB.509805.70  | hypothetical protein, conserved                            | -0,2616 | 0,004839 |
| TcCLB.508207.135 | hypothetical protein, conserved                            | -0,2617 | 0,02269  |
| TcCLB.509495.30  | trans-sialidase, Group I, putative                         | -0,2617 | 0,03713  |
| TcCLB.504741.60  | transcription initiation protein, putative                 | -0,2618 | 0,005135 |
| TcCLB.511711.20  | hypothetical protein, conserved                            | -0,262  | 0,0323   |
| TcCLB.503853.10  | hypothetical protein, conserved                            | -0,2621 | 0,01471  |
| TcCLB.443683.9   | DNA-directed rna polymerase I largest subunit, putative (I | -0,2621 | 0,06458  |
| TcCLB.510351.90  | dihydrolipoamide branched chain transacylase, putative     | -0,2623 | 0,003497 |
| TcCLB.510123.70  | vesicle-associated membrane protein, putative              | -0,2623 | 0,01301  |
| TcCLB.508647.80  | hypothetical protein, conserved                            | -0,2623 | 0,01446  |
| TcCLB.509899.20  | retrotransposon hot spot protein (RHS, pseudogene), puta   | -0,2623 | 0,05693  |
| TcCLB.509569.60  | hypothetical protein, conserved                            | -0,2624 | 0,04303  |
| TcCLB.510525.40  | hypothetical protein, conserved                            | -0,2626 | 0,09456  |
| TcCLB.509287.30  | hypothetical protein, conserved                            | -0,2627 | 0,003126 |
| TcCLB.510397.30  | retrotransposon hot spot protein (RHS, pseudogene), puta   | -0,2627 | 0,3752   |
| TcCLB.509753.50  | retrotransposon hot spot protein (RHS, pseudogene), puta   | -0,2628 | 0,4274   |
| TcCLB.511589.240 | hypothetical protein, conserved                            | -0,2629 | 0,02366  |
| TcCLB.508815.179 | dynein heavy chain, putative (fragment)                    | -0,263  | 0,0247   |
| TcCLB.507603.240 | hypothetical protein, conserved                            | -0,2631 | 0,0188   |
| TcCLB.506175.120 | hypothetical protein, conserved                            | -0,2631 | 0,4691   |
| TcCLB.511661.20  | hypothetical protein, conserved                            | -0,2633 | 0,01157  |
| TcCLB.506947.60  | hypothetical protein, conserved                            | -0,2633 | 0,04522  |
| TcCLB.506945.10  | hypothetical protein, conserved                            | -0,2634 | 0,1284   |
| TcCLB.511275.30  | actin-related protein 2/3 complex subunit 1, putative (ARI | -0,2635 | 0,03744  |
| TcCLB.509011.30  | hypothetical protein                                       | -0,2635 | 0,0598   |
| TcCLB.504059.11  | hypothetical protein, conserved (fragment)                 | -0,2635 | 0,07776  |
| TcCLB.507889.10  | transaldolase, putative                                    | -0,2636 | 0,024    |
| TcCLB.511315.44  | hypothetical protein, conserved (pseudogene)               | -0,2638 | 0,1795   |
| TcCLB.510841.10  | Kinesin-13 4b, putative (fragment) (KIN13-4b)              | -0,2638 | 0,2087   |
| TcCLB.506587.50  | hypothetical protein, conserved                            | -0,264  | 0,01151  |
| TcCLB.508257.260 | AP-1 adapter complex gamma subunit, putative               | -0,2642 | 0,002779 |
| TcCLB.508257.110 | hypothetical protein, conserved                            | -0,2642 | 0,007704 |
| TcCLB.510635.60  | hypothetical protein, conserved                            | -0,2642 | 0,04013  |
| TcCLB.508831.4   | dynein heavy chain, putative                               | -0,2643 | 0,02403  |
| TcCLB.511001.60  | protein kinase, putative                                   | -0,2646 | 0,04276  |
| TcCLB.506195.130 | hypothetical protein, conserved                            | -0,2646 | 0,07059  |
| TcCLB.510747.130 | hypothetical protein, conserved                            | -0,2647 | 0,004457 |
| TcCLB.509619.10  | Zn-finger protein, putative                                | -0,265  | 0,01506  |
| TcCLB.509941.30  | retrotransposon hot spot protein (RHS, pseudogene), puta   | -0,265  | 0,04157  |
| TcCLB.508355.70  | diacylglycerol acyltransferase, putative                   | -0,2651 | 0,006887 |

|                  |                                                         |         |           |
|------------------|---------------------------------------------------------|---------|-----------|
| TcCLB.506275.50  | Golgi SNAP receptor complex member 1, putative          | -0,2651 | 0,05293   |
| TcCLB.511019.99  | glutathione peroxidase, putative                        | -0,2651 | 0,1057    |
| TcCLB.510241.90  | hypothetical protein, conserved                         | -0,2654 | 0,003858  |
| TcCLB.509719.56  | hypothetical protein, conserved                         | -0,2658 | 0,003649  |
| TcCLB.508303.4   | ubiquitin-protein ligase, putative                      | -0,2658 | 0,03709   |
| TcCLB.506871.70  | hypothetical protein, conserved                         | -0,2659 | 0,03095   |
| TcCLB.506201.10  | hypothetical protein, conserved                         | -0,266  | 0,04764   |
| TcCLB.511523.20  | hypothetical protein, conserved                         | -0,266  | 0,05029   |
| TcCLB.506673.50  | apurinic/aprimidinic endonuclease, putative             | -0,2662 | 0,1286    |
| TcCLB.511285.20  | hypothetical protein, conserved                         | -0,2664 | 0,00181   |
| TcCLB.511071.80  | hypothetical protein, conserved                         | -0,2664 | 0,09711   |
| TcCLB.508461.250 | ATP-dependent RNA helicase, putative                    | -0,2666 | 0,001784  |
| TcCLB.511031.49  | hypothetical protein, conserved                         | -0,2666 | 0,03138   |
| TcCLB.505939.10  | hypothetical protein                                    | -0,2666 | 0,4409    |
| TcCLB.508879.90  | hypothetical protein, conserved                         | -0,2667 | 0,07653   |
| TcCLB.506855.270 | hypothetical protein, conserved                         | -0,267  | 0,1024    |
| TcCLB.509509.30  | 6-phosphofructo-2-kinase/fructose-2,6-biphosphatase, pu | -0,2671 | 0,01825   |
| TcCLB.504055.10  | hypothetical protein, conserved                         | -0,2671 | 0,06909   |
| TcCLB.510261.21  | hypothetical protein                                    | -0,2671 | 0,6439    |
| TcCLB.510529.20  | hypothetical protein, conserved                         | -0,2672 | 0,01277   |
| TcCLB.507963.70  | hypothetical protein, conserved                         | -0,2675 | 0,005388  |
| TcCLB.511723.10  | surface protease GP63, putative                         | -0,2675 | 0,08453   |
| TcCLB.510371.5   | elongation factor 1-gamma (EF-1-gamma, pseudogene),     | -0,2676 | 0,4953    |
| TcCLB.509161.34  | hypothetical protein, conserved                         | -0,2677 | 0,02857   |
| TcCLB.506943.30  | hypothetical protein, conserved                         | -0,2679 | 0,004882  |
| TcCLB.510601.20  | hypothetical protein, conserved                         | -0,2679 | 0,02249   |
| TcCLB.505555.10  | lysosomal/endosomal membrane protein p67 (pseudoger     | -0,2681 | 0,003184  |
| TcCLB.506567.130 | hypothetical protein, conserved                         | -0,2682 | 0,09879   |
| TcCLB.506587.10  | hypothetical protein, conserved                         | -0,2683 | 0,07209   |
| TcCLB.508731.40  | hypothetical protein, conserved                         | -0,2684 | 0,01637   |
| TcCLB.504741.230 | hypothetical protein, conserved                         | -0,2685 | 0,007668  |
| TcCLB.507837.100 | hypothetical protein, conserved                         | -0,2686 | 0,004748  |
| TcCLB.507037.60  | hypothetical protein, conserved                         | -0,2687 | 0,002585  |
| TcCLB.506493.20  | hypothetical protein                                    | -0,2689 | 0,2733    |
| TcCLB.507209.60  | hypothetical protein, conserved                         | -0,269  | 0,00531   |
| TcCLB.510819.40  | hypothetical protein, conserved                         | -0,269  | 0,07026   |
| TcCLB.508569.130 | 6-phosphofructo-2-kinase/fructose-2,6-biphosphatase, pu | -0,2691 | 0,0008399 |
| TcCLB.503781.50  | hypothetical protein, conserved                         | -0,2691 | 0,01699   |
| TcCLB.510901.120 | protein kinase, putative                                | -0,2692 | 0,002505  |
| TcCLB.507757.40  | hypothetical protein                                    | -0,2695 | 0,006214  |
| TcCLB.510293.50  | DnaJ chaperone protein, putative                        | -0,2696 | 0,01088   |
| TcCLB.507915.19  | mismatch repair protein MSH3, putative                  | -0,2696 | 0,1596    |
| TcCLB.507797.9   | nuclear transcription factor, putative                  | -0,2697 | 0,1479    |
| TcCLB.504655.30  | protein kinase, putative                                | -0,2698 | 0,007587  |
| TcCLB.508815.170 | protein kinase, putative                                | -0,27   | 0,0001866 |

|                  |                                                              |         |           |
|------------------|--------------------------------------------------------------|---------|-----------|
| TcCLB.511301.60  | hypothetical protein, conserved                              | -0,27   | 0,02462   |
| TcCLB.508397.64  | hypothetical protein, conserved                              | -0,27   | 0,1004    |
| TcCLB.510227.20  | hypothetical protein                                         | -0,2701 | 0,01812   |
| TcCLB.511587.39  | ATP-dependent DEAD/H RNA helicase (pseudogene), puta         | -0,2701 | 0,1762    |
| TcCLB.409407.10  | trans-sialidase (pseudogene), putative                       | -0,2702 | 0,3024    |
| TcCLB.506871.180 | G5-interacting protein, putative (G5-IP)                     | -0,2703 | 0,002634  |
| TcCLB.506857.60  | peptidyl-prolyl cis-trans isomerase, putative (PAR45)        | -0,2703 | 0,004513  |
| TcCLB.510257.60  | 3-ketoacyl-CoA reductase, putative                           | -0,2709 | 0,01196   |
| TcCLB.509595.30  | hypothetical protein, conserved                              | -0,2709 | 0,01782   |
| TcCLB.506869.54  | hypothetical protein, conserved                              | -0,271  | 0,04652   |
| TcCLB.506537.100 | trans-sialidase (pseudogene), putative                       | -0,2712 | 0,02026   |
| TcCLB.510163.10  | hypothetical protein, conserved                              | -0,2712 | 0,02132   |
| TcCLB.503685.10  | serine/threonine-protein kinase, putative                    | -0,2713 | 0,04025   |
| TcCLB.510437.70  | hypothetical protein, conserved                              | -0,2713 | 0,05827   |
| TcCLB.508257.230 | target of rapamycin kinase (TOR) kinase 3, putative          | -0,2714 | 0,0002021 |
| TcCLB.503899.139 | hypothetical protein, conserved                              | -0,2715 | 0,001196  |
| TcCLB.511071.181 | hypothetical protein, conserved                              | -0,2715 | 0,008003  |
| TcCLB.506127.120 | hypothetical protein, conserved                              | -0,2716 | 0,01853   |
| TcCLB.506425.100 | hypothetical protein, conserved                              | -0,2717 | 0,01417   |
| TcCLB.506319.30  | hypothetical protein, conserved                              | -0,2719 | 0,03862   |
| TcCLB.506775.22  | hypothetical protein, conserved                              | -0,272  | 0,0181    |
| TcCLB.505997.60  | retrotransposon hot spot (RHS) protein, putative             | -0,2721 | 0,09234   |
| TcCLB.511867.160 | hypothetical protein, conserved                              | -0,2721 | 0,09356   |
| TcCLB.511155.4   | hypothetical protein, conserved                              | -0,2724 | 0,03593   |
| TcCLB.509217.146 | N-acetyltransferase complex ARD1 subunit (pseudogene),       | -0,2724 | 0,5125    |
| TcCLB.506925.520 | hypothetical protein, conserved                              | -0,2728 | 0,01478   |
| TcCLB.507929.30  | hypothetical protein, conserved                              | -0,2728 | 0,08781   |
| TcCLB.508929.10  | UDP-Gal or UDP-GlcNAc-dependent glycosyltransferase, $\beta$ | -0,273  | 0,168     |
| TcCLB.416511.9   | mismatch repair protein MSH3, putative                       | -0,2731 | 0,0342    |
| TcCLB.510145.30  | hypothetical protein, conserved                              | -0,2732 | 0,02284   |
| TcCLB.508919.180 | trans-sialidase (pseudogene), putative                       | -0,2734 | 0,003388  |
| TcCLB.506629.180 | hypothetical protein, conserved                              | -0,2734 | 0,09601   |
| TcCLB.506537.30  | hypothetical protein, conserved (pseudogene)                 | -0,2735 | 0,01363   |
| TcCLB.506563.160 | hypothetical protein, conserved                              | -0,2736 | 0,006622  |
| TcCLB.503897.70  | hypothetical protein, conserved                              | -0,2737 | 0,0352    |
| TcCLB.506399.30  | hypothetical protein, conserved                              | -0,2737 | 0,07107   |
| TcCLB.508919.100 | hypothetical protein, conserved                              | -0,2738 | 0,01083   |
| TcCLB.503973.140 | hypothetical protein, conserved (pseudogene)                 | -0,2739 | 0,4081    |
| TcCLB.508577.150 | hypothetical protein, conserved                              | -0,274  | 0,1521    |
| TcCLB.509833.10  | hypothetical protein, conserved                              | -0,2741 | 0,07945   |
| TcCLB.506179.59  | ATP-dependent RNA helicase, putative (fragment)              | -0,2741 | 0,1267    |
| TcCLB.510901.250 | hypothetical protein, conserved                              | -0,2743 | 0,01436   |
| TcCLB.506195.40  | hypothetical protein, conserved                              | -0,2743 | 0,0589    |
| TcCLB.506441.10  | hypothetical protein, conserved                              | -0,2744 | 0,001635  |
| TcCLB.506425.110 | hypothetical protein, conserved                              | -0,2744 | 0,03761   |

|                  |                                                         |         |          |
|------------------|---------------------------------------------------------|---------|----------|
| TcCLB.507447.19  | microtubule-associated protein, putative (fragment)     | -0,2744 | 0,516    |
| TcCLB.508033.69  | mucin-associated surface protein (MASP, pseudogene), pi | -0,2745 | 0,2274   |
| TcCLB.399389.10  | hypothetical protein, conserved                         | -0,2747 | 0,001571 |
| TcCLB.510999.19  | hypothetical protein, conserved                         | -0,2748 | 0,05585  |
| TcCLB.510307.210 | trans-sialidase, Group II, putative                     | -0,2748 | 0,2345   |
| TcCLB.510743.20  | hypothetical protein, conserved                         | -0,275  | 0,06158  |
| TcCLB.511667.90  | hypothetical protein, conserved (pseudogene)            | -0,275  | 0,1068   |
| TcCLB.510207.21  | mucin-associated surface protein (MASP, pseudogene), pi | -0,2751 | 0,3142   |
| TcCLB.507765.110 | hypothetical protein, conserved                         | -0,2752 | 0,006351 |
| TcCLB.506905.20  | hypothetical protein, conserved                         | -0,2752 | 0,01344  |
| TcCLB.504163.70  | hypothetical protein, conserved                         | -0,2752 | 0,02255  |
| TcCLB.508175.114 | hypothetical protein, conserved                         | -0,2754 | 0,005372 |
| TcCLB.504229.37  | hypothetical protein                                    | -0,2755 | 0,3347   |
| TcCLB.509733.30  | hypothetical protein, conserved                         | -0,2758 | 0,007742 |
| TcCLB.508873.280 | mucin-associated surface protein (MASP, pseudogene), pi | -0,276  | 0,1885   |
| TcCLB.509575.20  | hypothetical protein, conserved                         | -0,2761 | 0,04827  |
| TcCLB.511277.92  | hypothetical protein, conserved                         | -0,2762 | 0,01053  |
| TcCLB.511481.55  | RNA-binding protein, putative                           | -0,2762 | 0,08647  |
| TcCLB.509259.100 | ATP-dependent DEAD/H RNA helicase (pseudogene), puta    | -0,2762 | 0,3368   |
| TcCLB.506993.40  | mucin TcMUCII, putative                                 | -0,2764 | 0,542    |
| TcCLB.427789.30  | NAD synthase, putative                                  | -0,2767 | 0,04013  |
| TcCLB.507601.60  | hypothetical protein, conserved                         | -0,2768 | 0,0498   |
| TcCLB.509233.220 | hypothetical protein, conserved                         | -0,2769 | 0,004898 |
| TcCLB.508153.570 | protein kinase, putative                                | -0,277  | 0,01999  |
| TcCLB.503515.7   | ribosomal RNA methyltransferase, putative (fragment)    | -0,2771 | 0,1006   |
| TcCLB.510371.30  | hypothetical protein, conserved (pseudogene)            | -0,2773 | 0,5244   |
| TcCLB.507559.50  | kinesin, putative                                       | -0,2774 | 0,01575  |
| TcCLB.507099.100 | hypothetical protein, conserved                         | -0,2774 | 0,03703  |
| TcCLB.510955.20  | hypothetical protein, conserved                         | -0,2775 | 0,003596 |
| TcCLB.511531.44  | hypothetical protein                                    | -0,2775 | 0,04183  |
| TcCLB.508671.20  | serine carboxypeptidase (CBP1), putative                | -0,2779 | 0,03269  |
| TcCLB.511145.24  | hypothetical protein, conserved                         | -0,2779 | 0,1975   |
| TcCLB.510877.90  | hypothetical protein, conserved                         | -0,278  | 0,007735 |
| TcCLB.504079.10  | branch point binding protein, putative                  | -0,278  | 0,02238  |
| TcCLB.508827.130 | hypothetical protein, conserved                         | -0,2782 | 0,01248  |
| TcCLB.511389.80  | protein kinase, putative                                | -0,2782 | 0,01461  |
| TcCLB.511245.90  | hypothetical protein, conserved                         | -0,2783 | 0,02582  |
| TcCLB.506249.10  | hypothetical protein, conserved                         | -0,2783 | 0,08009  |
| TcCLB.504017.70  | hypothetical protein                                    | -0,2784 | 0,02065  |
| TcCLB.506983.20  | hypothetical protein, conserved                         | -0,2785 | 0,004618 |
| TcCLB.506943.50  | glyceraldehyde 3-phosphate dehydrogenase, putative      | -0,2785 | 0,01924  |
| TcCLB.506593.40  | hypothetical protein, conserved                         | -0,2786 | 0,01484  |
| TcCLB.504045.30  | hypothetical protein                                    | -0,2787 | 0,04817  |
| TcCLB.509073.80  | hypothetical protein, conserved                         | -0,2788 | 0,02141  |
| TcCLB.510303.280 | hypothetical protein                                    | -0,2789 | 0,01455  |

|                  |                                                        |         |           |
|------------------|--------------------------------------------------------|---------|-----------|
| TcCLB.508793.14  | dynein regulatory complex subunit, putative (fragment) | -0,2791 | 0,005599  |
| TcCLB.503881.10  | kynureninase, putative                                 | -0,2792 | 0,0656    |
| TcCLB.508469.30  | hypothetical protein, conserved                        | -0,2793 | 0,05942   |
| TcCLB.507623.101 | surface protease GP63 (pseudogene), putative           | -0,2794 | 0,04651   |
| TcCLB.504039.99  | mucin TcMUCII (pseudogene), putative                   | -0,2794 | 0,3905    |
| TcCLB.511857.80  | AMP deaminase, putative                                | -0,2795 | 0,01096   |
| TcCLB.509911.40  | hypothetical protein, conserved                        | -0,2795 | 0,08803   |
| TcCLB.416619.10  | trans-sialidase, putative (fragment)                   | -0,2795 | 0,5281    |
| TcCLB.506949.20  | hypothetical protein, conserved                        | -0,2796 | 0,0004422 |
| TcCLB.510187.330 | hypothetical protein, conserved                        | -0,2797 | 0,002971  |
| TcCLB.506793.80  | ATP-dependent RNA helicase, putative                   | -0,2797 | 0,01291   |
| TcCLB.509455.110 | hypothetical protein, conserved                        | -0,2797 | 0,06145   |
| TcCLB.509163.54  | zinc finger protein, putative                          | -0,2797 | 0,6098    |
| TcCLB.506977.139 | hypothetical protein, conserved                        | -0,2799 | 0,01225   |
| TcCLB.507949.29  | conserved protein, unknown function                    | -0,2799 | 0,04552   |
| TcCLB.507629.30  | hypothetical protein, conserved                        | -0,2801 | 0,03036   |
| TcCLB.510303.260 | hypothetical protein, conserved                        | -0,2802 | 0,03101   |
| TcCLB.511229.20  | oxidoreductase, putative                               | -0,2802 | 0,06881   |
| TcCLB.511215.100 | hypothetical protein                                   | -0,2803 | 0,1219    |
| TcCLB.509233.120 | hypothetical protein, conserved                        | -0,2804 | 0,0006156 |
| TcCLB.506405.90  | hypothetical protein, conserved                        | -0,2804 | 0,03333   |
| TcCLB.410275.18  | trans-sialidase (pseudogene), putative                 | -0,2804 | 0,5671    |
| TcCLB.507011.200 | dihydroxyacetone kinase 1-like, putative               | -0,2805 | 0,01127   |
| TcCLB.511257.70  | surface protease GP63, putative                        | -0,2806 | 0,02212   |
| TcCLB.509163.60  | hypothetical protein, conserved                        | -0,2806 | 0,02487   |
| TcCLB.509733.10  | hypothetical protein, conserved                        | -0,2807 | 0,01711   |
| TcCLB.511003.80  | hypothetical protein, conserved                        | -0,2808 | 0,004605  |
| TcCLB.508727.24  | hypothetical protein                                   | -0,281  | 0,002169  |
| TcCLB.511627.140 | hypothetical protein, conserved                        | -0,2811 | 0,0365    |
| TcCLB.507825.49  | hypothetical protein, conserved (fragment)             | -0,2811 | 0,09437   |
| TcCLB.507241.20  | hypothetical protein, conserved                        | -0,2812 | 0,005941  |
| TcCLB.510303.60  | hypothetical protein, conserved                        | -0,2812 | 0,02844   |
| TcCLB.507207.10  | hypothetical protein, conserved                        | -0,2813 | 0,00695   |
| TcCLB.511211.240 | hypothetical protein, conserved                        | -0,2813 | 0,04434   |
| TcCLB.506739.20  | hypothetical protein, conserved                        | -0,2814 | 0,004068  |
| TcCLB.508719.50  | hypothetical protein, conserved                        | -0,2814 | 0,06154   |
| TcCLB.511683.20  | hypothetical protein, conserved                        | -0,2817 | 0,0232    |
| TcCLB.508181.10  | hypothetical protein, conserved                        | -0,2818 | 0,03035   |
| TcCLB.511717.110 | hypothetical protein, conserved                        | -0,2819 | 0,01786   |
| TcCLB.506223.30  | hypothetical protein, conserved                        | -0,2819 | 0,02229   |
| TcCLB.510611.30  | kinesin, putative                                      | -0,282  | 0,001226  |
| TcCLB.506327.70  | engulfment and cell motility domain 2, putative        | -0,282  | 0,00458   |
| TcCLB.511287.80  | hypothetical protein, conserved                        | -0,2821 | 0,05024   |
| TcCLB.509897.51  | hypothetical protein, conserved (pseudogene)           | -0,2821 | 0,0532    |
| TcCLB.507053.200 | hypothetical protein, conserved                        | -0,2822 | 0,0161    |

|                  |                                                             |         |           |
|------------------|-------------------------------------------------------------|---------|-----------|
| TcCLB.507857.10  | transcription elongation factor, putative                   | -0,2823 | 0,0108    |
| TcCLB.507993.10  | hypothetical protein, conserved                             | -0,2824 | 0,009797  |
| TcCLB.508257.240 | hypothetical protein, conserved                             | -0,2826 | 0,02838   |
| TcCLB.509073.100 | hypothetical protein, conserved                             | -0,2828 | 0,1109    |
| TcCLB.508559.80  | trans-sialidase (pseudogene), putative                      | -0,2828 | 0,1151    |
| TcCLB.510343.10  | hypothetical protein, conserved                             | -0,2828 | 0,1297    |
| TcCLB.511353.20  | hypothetical protein, conserved                             | -0,2829 | 0,008525  |
| TcCLB.508277.120 | ribosomal protein S6, putative                              | -0,2829 | 0,0454    |
| TcCLB.506399.20  | hypothetical protein, conserved                             | -0,283  | 0,02964   |
| TcCLB.511725.10  | proteasome regulatory non-ATPase subunit, putative          | -0,2831 | 0,01531   |
| TcCLB.511837.100 | amino acid permease-like protein, putative                  | -0,2832 | 0,01328   |
| TcCLB.508921.40  | hypothetical protein, conserved                             | -0,2833 | 0,1349    |
| TcCLB.506247.160 | hypothetical protein, conserved                             | -0,2835 | 0,00162   |
| TcCLB.508347.10  | hypothetical protein, conserved                             | -0,2835 | 0,00459   |
| TcCLB.507949.80  | kinetoplast ribosomal PPR-repeat containing protein 3, pu   | -0,2835 | 0,009139  |
| TcCLB.508235.40  | protein kinase, putative (fragment)                         | -0,2835 | 0,09917   |
| TcCLB.506587.20  | hypothetical protein                                        | -0,2836 | 0,01086   |
| TcCLB.503899.40  | hypothetical protein, conserved                             | -0,2838 | 0,003973  |
| TcCLB.508461.280 | protein kinase A catalytic subunit isoform 2, putative      | -0,2838 | 0,03253   |
| TcCLB.503893.10  | copper-transporting ATPase-like protein, putative           | -0,2838 | 0,1668    |
| TcCLB.508231.150 | hypothetical protein                                        | -0,2839 | 0,003637  |
| TcCLB.509127.20  | hypothetical protein, conserved                             | -0,2839 | 0,03583   |
| TcCLB.503619.20  | hypothetical protein, conserved                             | -0,284  | 0,01312   |
| TcCLB.506177.70  | hypothetical protein                                        | -0,284  | 0,08757   |
| TcCLB.507049.160 | hypothetical protein, conserved                             | -0,2841 | 0,02822   |
| TcCLB.510603.100 | hypothetical protein, conserved                             | -0,2841 | 0,08612   |
| TcCLB.508269.80  | retrotransposon hot spot protein (RHS, pseudogene), puta    | -0,2841 | 0,2036    |
| TcCLB.508209.60  | spliced leader RNA PSE-promoter transcription factor, put   | -0,2843 | 0,004684  |
| TcCLB.508817.180 | DIS3-like exonuclease, putative (pseudogene)                | -0,2845 | 0,002328  |
| TcCLB.511229.90  | hypothetical protein, conserved                             | -0,2845 | 0,009872  |
| TcCLB.508765.30  | glycosylphosphatidylinositol-specific phospholipase C, puti | -0,2845 | 0,0338    |
| TcCLB.507625.90  | hypothetical protein, conserved                             | -0,2846 | 0,04933   |
| TcCLB.510429.50  | Lsm12 protein, putative                                     | -0,2848 | 0,01586   |
| TcCLB.506943.60  | glyceraldehyde 3-phosphate dehydrogenase, putative          | -0,2849 | 0,1155    |
| TcCLB.508583.10  | hypothetical protein, conserved                             | -0,285  | 0,06055   |
| TcCLB.503547.20  | dispersed gene family protein 1 (DGF-1, pseudogene), put    | -0,285  | 0,4282    |
| TcCLB.511179.140 | hypothetical protein, conserved                             | -0,2853 | 0,001243  |
| TcCLB.404073.20  | actin, putative (fragment)                                  | -0,2854 | 0,1344    |
| TcCLB.509937.110 | hypothetical protein, conserved                             | -0,2855 | 0,0179    |
| TcCLB.506355.110 | hypothetical protein, conserved                             | -0,2856 | 0,001366  |
| TcCLB.511127.30  | hypothetical protein, conserved                             | -0,2856 | 0,02209   |
| TcCLB.508949.10  | hypothetical protein, conserved                             | -0,2856 | 0,03204   |
| TcCLB.507017.50  | polynucleotide kinase 3'-phosphatase, putative              | -0,2858 | 0,01423   |
| TcCLB.509611.140 | hypothetical protein, conserved                             | -0,2858 | 0,01484   |
| TcCLB.506213.40  | hypothetical protein, conserved                             | -0,2861 | 0,0002927 |

|                  |                                                         |         |           |
|------------------|---------------------------------------------------------|---------|-----------|
| TcCLB.508837.140 | U1 small nuclear ribonucleoprotein, putative            | -0,2861 | 0,0476    |
| TcCLB.504125.10  | SWI/SNF-related matrix-associated actin-dependent regu  | -0,2862 | 0,003465  |
| TcCLB.508209.159 | hypothetical protein, conserved                         | -0,2865 | 0,03178   |
| TcCLB.506947.80  | arginine N-methyltransferase, type I (PRMT6)            | -0,2867 | 0,06754   |
| TcCLB.508495.110 | hypothetical protein                                    | -0,2867 | 0,4691    |
| TcCLB.507089.100 | hypothetical protein, conserved                         | -0,2868 | 0,01417   |
| TcCLB.504835.29  | hypothetical protein, conserved                         | -0,2869 | 0,002215  |
| TcCLB.508821.60  | hypothetical protein, conserved                         | -0,2869 | 0,2816    |
| TcCLB.504131.10  | hypothetical protein, conserved (pseudogene)            | -0,287  | 0,006461  |
| TcCLB.511875.40  | surface protease GP63 (pseudogene), putative            | -0,287  | 0,04619   |
| TcCLB.508707.60  | hypothetical protein, conserved                         | -0,2872 | 0,0009761 |
| TcCLB.503593.60  | hypothetical protein, conserved                         | -0,2872 | 0,01232   |
| TcCLB.503679.20  | hypothetical protein, conserved                         | -0,2873 | 0,01231   |
| TcCLB.511385.80  | kinesin-like protein, putative                          | -0,2873 | 0,01877   |
| TcCLB.506213.110 | hypothetical protein                                    | -0,2874 | 0,001664  |
| TcCLB.504839.36  | hypothetical protein, conserved                         | -0,2874 | 0,05442   |
| TcCLB.507491.59  | ubiquitin fold modifier protein, putative (UFM1)        | -0,2875 | 0,129     |
| TcCLB.506181.140 | hypothetical protein                                    | -0,2876 | 0,008037  |
| TcCLB.405179.10  | dynein heavy chain, putative (fragment)                 | -0,2876 | 0,03874   |
| TcCLB.511381.40  | DNA-directed rna polymerase I largest subunit, putative | -0,2878 | 0,0002005 |
| TcCLB.510659.279 | nucleic acid binding protein, putative                  | -0,2879 | 0,06055   |
| TcCLB.503833.10  | hypothetical protein, conserved                         | -0,2881 | 0,002348  |
| TcCLB.506755.80  | hypothetical protein                                    | -0,2881 | 0,01284   |
| TcCLB.509803.50  | hypothetical protein, conserved                         | -0,2882 | 0,005242  |
| TcCLB.507527.20  | hypothetical protein, conserved                         | -0,2883 | 0,0021    |
| TcCLB.509505.40  | hypothetical protein, conserved                         | -0,2883 | 0,01343   |
| TcCLB.509719.80  | hypothetical protein, conserved                         | -0,2883 | 0,02      |
| TcCLB.508445.50  | hypothetical protein, conserved                         | -0,2884 | 0,07937   |
| TcCLB.503459.29  | hypothetical protein, conserved                         | -0,2886 | 0,02887   |
| TcCLB.510967.10  | GPI inositol deacylase precursor, putative              | -0,2886 | 0,06175   |
| TcCLB.508539.95  | surface protease GP63 (pseudogene), putative            | -0,2886 | 0,4404    |
| TcCLB.508169.100 | hypothetical protein, conserved                         | -0,2887 | 0,01311   |
| TcCLB.507677.30  | hypothetical protein, conserved                         | -0,2889 | 0,007076  |
| TcCLB.507023.250 | hypothetical protein, conserved                         | -0,2889 | 0,01998   |
| TcCLB.503555.10  | DNA replication licensing factor MCM8, putative         | -0,2889 | 0,02472   |
| TcCLB.510701.31  | hypothetical protein                                    | -0,2889 | 0,5704    |
| TcCLB.507867.80  | hypothetical protein, conserved                         | -0,289  | 0,0004937 |
| TcCLB.507641.239 | hypothetical protein, conserved                         | -0,2893 | 0,002612  |
| TcCLB.510699.34  | trans-sialidase (pseudogene), putative                  | -0,2894 | 0,2336    |
| TcCLB.507709.70  | hypothetical protein, conserved                         | -0,2895 | 0,006252  |
| TcCLB.507993.5   | GPI-anchor transamidase subunit 8 (GPI8, pseudogene), p | -0,2897 | 0,1891    |
| TcCLB.508637.30  | hypothetical protein, conserved (pseudogene)            | -0,2898 | 0,2194    |
| TcCLB.510889.251 | Present in the outer mitochondrial membrane proteome 1  | -0,29   | 0,07161   |
| TcCLB.508825.30  | surface protease GP63 (pseudogene), putative            | -0,2901 | 0,02104   |
| TcCLB.504027.10  | hypothetical protein, conserved                         | -0,2901 | 0,03556   |

|                  |                                                         |         |            |
|------------------|---------------------------------------------------------|---------|------------|
| TcCLB.509581.20  | beta galactofuranosyl glycosyltransferase, putative     | -0,2903 | 0,0395     |
| TcCLB.510187.190 | vacuolar protein sorting-associated protein, putative   | -0,2904 | 0,0003633  |
| TcCLB.507093.66  | hypothetical protein, conserved                         | -0,2904 | 0,01602    |
| TcCLB.403789.9   | DNA-directed rna polymerase I largest subunit, putative | -0,2904 | 0,09178    |
| TcCLB.511301.160 | trans-sialidase, Group II, putative                     | -0,2906 | 0,03188    |
| TcCLB.510197.95  | hypothetical protein, conserved (pseudogene)            | -0,2906 | 0,1491     |
| TcCLB.511713.20  | hypothetical protein, conserved                         | -0,2908 | 0,007626   |
| TcCLB.510067.9   | hypothetical protein, conserved                         | -0,2908 | 0,01222    |
| TcCLB.508891.80  | hypothetical protein, conserved (pseudogene)            | -0,2909 | 0,02567    |
| TcCLB.509017.50  | hypothetical protein, conserved                         | -0,291  | 0,0002305  |
| TcCLB.510491.50  | hypothetical protein, conserved                         | -0,291  | 0,1546     |
| TcCLB.511753.30  | kinesin, putative                                       | -0,2912 | 0,001138   |
| TcCLB.509171.80  | hypothetical protein, conserved                         | -0,2912 | 0,00701    |
| TcCLB.506929.50  | hypothetical protein, conserved                         | -0,2912 | 0,00858    |
| TcCLB.430737.20  | hypothetical protein, conserved (fragment)              | -0,2912 | 0,07107    |
| TcCLB.511523.90  | hypothetical protein, conserved                         | -0,2913 | 0,00191    |
| TcCLB.508153.890 | hypothetical protein, conserved                         | -0,2914 | 0,00006872 |
| TcCLB.504033.140 | hypothetical protein, conserved (pseudogene)            | -0,2914 | 0,002632   |
| TcCLB.511201.58  | hypothetical protein                                    | -0,2914 | 0,01006    |
| TcCLB.503955.110 | protein kinase, putative                                | -0,2914 | 0,01356    |
| TcCLB.508409.170 | hypothetical protein, conserved                         | -0,2916 | 0,02024    |
| TcCLB.511907.220 | hypothetical protein, conserved                         | -0,2917 | 0,01608    |
| TcCLB.504587.10  | surface protease GP63 (pseudogene), putative            | -0,2919 | 0,3051     |
| TcCLB.510885.60  | hypothetical protein, conserved                         | -0,2922 | 0,002109   |
| TcCLB.511245.79  | hypothetical protein, conserved                         | -0,2922 | 0,0187     |
| TcCLB.503579.50  | hypothetical protein, conserved                         | -0,2923 | 0,001175   |
| TcCLB.511257.100 | surface protease GP63, putative                         | -0,2924 | 0,006835   |
| TcCLB.509993.31  | mucin-associated surface protein (MASP, pseudogene), pi | -0,2924 | 0,2584     |
| TcCLB.506789.230 | hypothetical protein, conserved                         | -0,2925 | 0,00003251 |
| TcCLB.506625.160 | hypothetical protein, conserved                         | -0,2925 | 0,00009022 |
| TcCLB.507685.20  | trans-sialidase (pseudogene), putative                  | -0,2926 | 0,2178     |
| TcCLB.508647.30  | hypothetical protein, conserved                         | -0,2928 | 0,01151    |
| TcCLB.510493.10  | hypothetical protein, conserved                         | -0,2928 | 0,09126    |
| TcCLB.508153.450 | hypothetical protein, conserved                         | -0,2929 | 0,004094   |
| TcCLB.511737.20  | hypothetical protein, conserved                         | -0,293  | 0,00154    |
| TcCLB.511153.140 | proteasome beta 3 subunit, putative                     | -0,293  | 0,02862    |
| TcCLB.511529.230 | hypothetical protein, conserved                         | -0,2931 | 0,039      |
| TcCLB.506925.70  | epsin, putative                                         | -0,2932 | 0,0004384  |
| TcCLB.510187.310 | hypothetical protein, conserved                         | -0,2934 | 0,001582   |
| TcCLB.509455.9   | hypothetical protein, conserved                         | -0,2934 | 0,005276   |
| TcCLB.506585.60  | hypothetical protein, conserved                         | -0,2934 | 0,02183    |
| TcCLB.510105.30  | clathrin coat assembly protein, putative                | -0,2935 | 0,01896    |
| TcCLB.503653.50  | histone deacetylase, putative                           | -0,2937 | 0,005911   |
| TcCLB.411427.40  | hypothetical protein, conserved                         | -0,2937 | 0,1168     |
| TcCLB.503777.10  | suppressive immunomodulating factor, putative (TSIF)    | -0,2938 | 0,002837   |



|                  |                                                         |         |            |
|------------------|---------------------------------------------------------|---------|------------|
| TcCLB.511361.70  | hypothetical protein, conserved                         | -0,2939 | 0,005137   |
| TcCLB.509715.23  | RNA-binding protein, putative                           | -0,294  | 0,1778     |
| TcCLB.511875.25  | elongation factor 1-gamma (EF-1-gamma, pseudogene),     | -0,294  | 0,3927     |
| TcCLB.509179.210 | hypothetical protein, conserved                         | -0,2946 | 0,01074    |
| TcCLB.506489.10  | hypothetical protein, conserved                         | -0,2947 | 0,0001772  |
| TcCLB.510027.10  | GDP-mannose 4,6 dehydratase, putative                   | -0,2948 | 0,009183   |
| TcCLB.508879.70  | hypothetical protein, conserved                         | -0,295  | 0,02872    |
| TcCLB.511627.90  | hypothetical protein, conserved                         | -0,295  | 0,05583    |
| TcCLB.508271.50  | hypothetical protein                                    | -0,2953 | 0,002348   |
| TcCLB.509105.150 | heat shock protein 85, putative                         | -0,2953 | 0,01064    |
| TcCLB.506297.140 | hypothetical protein, conserved                         | -0,2954 | 0,01602    |
| TcCLB.509751.4   | hypothetical protein, conserved (fragment)              | -0,2955 | 0,1769     |
| TcCLB.506559.4   | hypothetical protein, conserved (fragment)              | -0,2956 | 0,02028    |
| TcCLB.506213.10  | hypothetical protein, conserved                         | -0,2956 | 0,02031    |
| TcCLB.511907.140 | hypothetical protein                                    | -0,2957 | 0,09619    |
| TcCLB.507519.167 | hypothetical protein                                    | -0,2957 | 0,1341     |
| TcCLB.506945.330 | hypothetical protein, conserved                         | -0,2958 | 0,00008496 |
| TcCLB.506925.340 | hypothetical protein, conserved                         | -0,2959 | 0,02597    |
| TcCLB.507049.130 | hypothetical protein, conserved (pseudogene)            | -0,2959 | 0,1384     |
| TcCLB.511623.20  | hypothetical protein, conserved                         | -0,296  | 0,05648    |
| TcCLB.511717.190 | hypothetical protein, conserved                         | -0,2961 | 0,02751    |
| TcCLB.506821.160 | hypothetical protein, conserved                         | -0,2962 | 0,008325   |
| TcCLB.507993.33  | hypothetical protein, conserved                         | -0,2963 | 0,04393    |
| TcCLB.506265.209 | hypothetical protein, conserved (fragment)              | -0,2964 | 0,3349     |
| TcCLB.508851.31  | N-acetyltransferase complex ARD1 subunit (pseudogene),  | -0,2967 | 0,2127     |
| TcCLB.506695.30  | protein kinase, putative                                | -0,2969 | 0,01735    |
| TcCLB.508741.370 | hypothetical protein, conserved                         | -0,2971 | 0,00007255 |
| TcCLB.461515.10  | mucin TcMUCl, putative (fragment)                       | -0,2972 | 0,02054    |
| TcCLB.508257.40  | hypothetical protein, conserved                         | -0,2973 | 0,005159   |
| TcCLB.507823.10  | hypothetical protein, conserved                         | -0,2974 | 0,01081    |
| TcCLB.508881.100 | hypothetical protein, conserved                         | -0,2975 | 0,001052   |
| TcCLB.507633.110 | mucin-associated surface protein (MASP, pseudogene), pi | -0,2976 | 0,2629     |
| TcCLB.503779.100 | hypothetical protein, conserved                         | -0,2977 | 0,01488    |
| TcCLB.508207.270 | hypothetical protein, conserved                         | -0,2979 | 0,001128   |
| TcCLB.505007.39  | hypothetical protein, conserved                         | -0,298  | 0,05138    |
| TcCLB.506357.150 | hypothetical protein, conserved                         | -0,2981 | 0,002938   |
| TcCLB.419469.30  | hypothetical protein, conserved                         | -0,2982 | 0,009721   |
| TcCLB.510105.160 | hypothetical protein                                    | -0,2982 | 0,04114    |
| TcCLB.503479.20  | hypothetical protein, conserved (pseudogene)            | -0,2985 | 0,09121    |
| TcCLB.509965.160 | hypothetical protein, conserved                         | -0,2986 | 0,04267    |
| TcCLB.503419.40  | hypothetical protein, conserved                         | -0,2987 | 0,01909    |
| TcCLB.511717.10  | hypothetical protein, conserved (pseudogene)            | -0,2987 | 0,1744     |
| TcCLB.508479.270 | hypothetical protein, conserved                         | -0,2988 | 0,000466   |
| TcCLB.506753.60  | GDP-mannose transporter, putative                       | -0,2988 | 0,04197    |
| TcCLB.510561.35  | hypothetical protein                                    | -0,2988 | 0,5011     |

|                  |                                                         |         |            |
|------------------|---------------------------------------------------------|---------|------------|
| TcCLB.504253.50  | hypothetical protein, conserved                         | -0,2989 | 0,02247    |
| TcCLB.508181.120 | hypothetical protein, conserved                         | -0,299  | 0,002352   |
| TcCLB.503929.40  | hypothetical protein, conserved                         | -0,2992 | 0,04464    |
| TcCLB.506709.10  | hypothetical protein, conserved                         | -0,2994 | 0,00314    |
| TcCLB.509047.30  | hypothetical protein, conserved                         | -0,2995 | 0,06263    |
| TcCLB.508351.50  | rho-like GTP binding protein, putative                  | -0,2998 | 0,005756   |
| TcCLB.508389.20  | hypothetical protein                                    | -0,2999 | 0,00247    |
| TcCLB.439653.10  | NADH-dependent fumarate reductase, putative             | -0,2999 | 0,2404     |
| TcCLB.506163.30  | hypothetical protein, conserved                         | -0,3    | 0,01222    |
| TcCLB.416891.19  | hypothetical protein                                    | -0,3    | 0,1445     |
| TcCLB.506181.20  | hypothetical protein, conserved                         | -0,3001 | 0,003909   |
| TcCLB.510295.10  | Enriched in surface-labeled proteome protein 18 (ESP18) | -0,3001 | 0,005139   |
| TcCLB.510821.40  | hypothetical protein, conserved                         | -0,3001 | 0,00749    |
| TcCLB.506567.34  | hypothetical protein, conserved                         | -0,3003 | 0,00286    |
| TcCLB.503835.10  | hypothetical protein, conserved                         | -0,3005 | 0,05139    |
| TcCLB.510381.50  | hypothetical protein, conserved                         | -0,3006 | 0,06532    |
| TcCLB.511721.10  | hypothetical protein, conserved                         | -0,3007 | 0,005436   |
| TcCLB.509443.60  | hypothetical protein, conserved                         | -0,3007 | 0,1142     |
| TcCLB.509643.130 | heat shock protein 85, putative                         | -0,3008 | 0,009834   |
| TcCLB.507429.60  | hypothetical protein                                    | -0,3008 | 0,1557     |
| TcCLB.508461.320 | PRP8 protein homologue, putative                        | -0,301  | 0,00000919 |
| TcCLB.509451.24  | hypothetical protein, conserved (fragment)              | -0,301  | 0,005418   |
| TcCLB.508233.19  | hypothetical protein, conserved                         | -0,301  | 0,07599    |
| TcCLB.506605.50  | hypothetical protein, conserved                         | -0,3011 | 0,001865   |
| TcCLB.509777.100 | ubiquitin-activating enzyme, putative                   | -0,3014 | 0,00272    |
| TcCLB.508909.90  | Protein kinase domain, putative                         | -0,3015 | 0,0005615  |
| TcCLB.510431.160 | nucleolar GTP-binding protein 1, putative               | -0,3016 | 0,02791    |
| TcCLB.506181.90  | F-actin capping protein, putative                       | -0,3017 | 0,005527   |
| TcCLB.511211.49  | hypothetical protein, conserved                         | -0,3017 | 0,01161    |
| TcCLB.506177.60  | hypothetical protein                                    | -0,3018 | 0,01157    |
| TcCLB.508461.589 | hypothetical protein, conserved (fragment)              | -0,3018 | 0,1138     |
| TcCLB.506925.200 | hypothetical protein, conserved                         | -0,302  | 0,002131   |
| TcCLB.504227.10  | hypothetical protein, conserved                         | -0,3021 | 0,02023    |
| TcCLB.509055.30  | hypothetical protein, conserved                         | -0,3022 | 0,006846   |
| TcCLB.506507.20  | hypothetical protein, conserved                         | -0,3022 | 0,04388    |
| TcCLB.510357.160 | hypothetical protein, conserved (fragment)              | -0,3022 | 0,1533     |
| TcCLB.506529.40  | hypothetical protein, conserved                         | -0,3023 | 0,04979    |
| TcCLB.508409.80  | hypothetical protein, conserved                         | -0,3024 | 0,0000621  |
| TcCLB.507887.30  | hypothetical protein, conserved                         | -0,3024 | 0,03786    |
| TcCLB.506965.110 | hypothetical protein                                    | -0,3024 | 0,4694     |
| TcCLB.509099.5   | NUP-1 protein, putative (fragment)                      | -0,3025 | 0,02018    |
| TcCLB.510767.60  | hypothetical protein, conserved                         | -0,3025 | 0,02882    |
| TcCLB.507085.130 | hypothetical protein                                    | -0,3025 | 0,415      |
| TcCLB.506835.50  | hypothetical protein                                    | -0,3026 | 0,0005615  |
| TcCLB.508533.40  | ecotin, putative                                        | -0,3027 | 0,02115    |

|                  |                                                           |         |           |
|------------------|-----------------------------------------------------------|---------|-----------|
| TcCLB.507941.100 | hypothetical protein, conserved                           | -0,3028 | 0,00634   |
| TcCLB.412093.10  | antigenic protein (pseudogene), putative                  | -0,3028 | 0,1398    |
| TcCLB.507041.55  | mucin-associated surface protein (MASP, pseudogene), p    | -0,3029 | 0,2637    |
| TcCLB.511281.10  | hypothetical protein, conserved                           | -0,303  | 0,03146   |
| TcCLB.506127.160 | hypothetical protein, conserved                           | -0,3031 | 0,006634  |
| TcCLB.504009.60  | hypothetical protein, conserved                           | -0,3034 | 0,002567  |
| TcCLB.506925.10  | hypothetical protein                                      | -0,3035 | 0,1755    |
| TcCLB.506647.10  | hypothetical protein, conserved                           | -0,3037 | 0,003204  |
| TcCLB.507885.10  | RNA-binding protein, putative                             | -0,3037 | 0,04518   |
| TcCLB.506295.90  | coatomer subunit zeta, putative                           | -0,3038 | 0,04174   |
| TcCLB.508971.10  | UDP-Gal or UDP-GlcNAc-dependent glycosyltransferase, p    | -0,3039 | 0,05411   |
| TcCLB.507991.20  | protein kinase, putative                                  | -0,304  | 0,01692   |
| TcCLB.511167.40  | hypothetical protein, conserved                           | -0,3041 | 0,03394   |
| TcCLB.507071.294 | surface protease GP63 (pseudogene), putative              | -0,3041 | 0,5999    |
| TcCLB.506679.240 | hypothetical protein, conserved                           | -0,3042 | 0,01016   |
| TcCLB.508505.40  | hypothetical protein, conserved                           | -0,3043 | 0,01737   |
| TcCLB.506951.70  | surface protease GP63 (pseudogene), putative              | -0,3044 | 0,2412    |
| TcCLB.510297.80  | DNA repair and transcription factor protein, putative     | -0,3045 | 0,01537   |
| TcCLB.506753.40  | hypothetical protein, conserved                           | -0,3046 | 0,03586   |
| TcCLB.503543.4   | hypothetical protein, conserved (fragment)                | -0,3046 | 0,09704   |
| TcCLB.503851.40  | hypothetical protein, conserved                           | -0,3047 | 0,005834  |
| TcCLB.511625.4   | hypothetical protein, conserved                           | -0,3047 | 0,0911    |
| TcCLB.503923.10  | hypothetical protein, conserved                           | -0,3049 | 0,00563   |
| TcCLB.510421.100 | hypothetical protein, conserved                           | -0,3051 | 0,006164  |
| TcCLB.509099.120 | hypothetical protein, conserved                           | -0,3052 | 0,02331   |
| TcCLB.506011.30  | hypothetical protein, conserved                           | -0,3052 | 0,09769   |
| TcCLB.511211.210 | hypothetical protein, conserved                           | -0,3052 | 0,1135    |
| TcCLB.506691.90  | serine/threonine protein kinase, putative                 | -0,3052 | 0,3853    |
| TcCLB.507857.4   | transcription elongation factor, putative                 | -0,3054 | 0,01204   |
| TcCLB.510903.30  | helicase-like protein, putative                           | -0,3055 | 0,006819  |
| TcCLB.508545.30  | hypothetical protein, conserved                           | -0,3056 | 0,1039    |
| TcCLB.506835.80  | CAS/CSE/importin domain protein, putative                 | -0,3057 | 0,0005635 |
| TcCLB.508997.20  | phosphatidylinositol 3-kinase, putative                   | -0,3057 | 0,001732  |
| TcCLB.508919.80  | hypothetical protein, conserved                           | -0,3057 | 0,01695   |
| TcCLB.511231.40  | hypothetical protein, conserved                           | -0,306  | 0,09362   |
| TcCLB.509729.20  | hypothetical protein, conserved                           | -0,3062 | 0,005175  |
| TcCLB.507017.104 | hypothetical protein                                      | -0,3063 | 0,03422   |
| TcCLB.511111.50  | ubiquitin-conjugating enzyme, putative                    | -0,3063 | 0,3737    |
| TcCLB.508501.10  | hypothetical protein                                      | -0,3064 | 0,2318    |
| TcCLB.511807.33  | expression site-associated gene (ESAG-like) protein, puta | -0,3065 | 0,003973  |
| TcCLB.506221.20  | hypothetical protein, conserved                           | -0,3066 | 0,0332    |
| TcCLB.506247.460 | hypothetical protein, conserved                           | -0,3067 | 0,008182  |
| TcCLB.506679.20  | hypothetical protein, conserved                           | -0,3067 | 0,1953    |
| TcCLB.508699.50  | hypothetical protein, conserved                           | -0,3069 | 0,004067  |
| TcCLB.507317.30  | hypothetical protein, conserved                           | -0,3071 | 0,03534   |

|                  |                                                                    |         |           |
|------------------|--------------------------------------------------------------------|---------|-----------|
| TcCLB.504243.49  | hypothetical protein, conserved (fragment)                         | -0,3072 | 0,01182   |
| TcCLB.511761.70  | hypothetical protein, conserved                                    | -0,3072 | 0,01182   |
| TcCLB.511237.90  | hypothetical protein, conserved                                    | -0,3072 | 0,1386    |
| TcCLB.503463.20  | hypothetical protein, conserved                                    | -0,3074 | 0,007399  |
| TcCLB.510329.250 | hypothetical protein, conserved                                    | -0,3074 | 0,03747   |
| TcCLB.510651.20  | hypothetical protein, conserved                                    | -0,3074 | 0,03846   |
| TcCLB.503893.120 | calcium uniporter protein, mitochondrial, putative                 | -0,3075 | 0,01551   |
| TcCLB.511527.20  | TFIIH basal transcription factor complex helicase XPB subunit      | -0,3076 | 0,002467  |
| TcCLB.511279.50  | hypothetical protein, conserved                                    | -0,3076 | 0,02788   |
| TcCLB.508163.371 | hypothetical protein, conserved (pseudogene)                       | -0,3076 | 0,2058    |
| TcCLB.511263.30  | hypothetical protein, conserved                                    | -0,3077 | 0,0004454 |
| TcCLB.503583.30  | hypothetical protein, conserved                                    | -0,3077 | 0,02318   |
| TcCLB.507901.30  | retrotransposon hot spot protein (RHS, pseudogene), putative       | -0,3079 | 0,0149    |
| TcCLB.508543.140 | electron transfer flavoprotein-ubiquinone oxidoreductase, putative | -0,3079 | 0,1448    |
| TcCLB.509671.160 | DNA polymerase epsilon subunit B, putative                         | -0,308  | 0,008966  |
| TcCLB.402647.9   | hypothetical protein, conserved                                    | -0,308  | 0,01934   |
| TcCLB.503891.110 | dolicholphosphate-mannose synthase, putative                       | -0,308  | 0,02064   |
| TcCLB.511625.40  | protein phosphatase 2C, putative                                   | -0,308  | 0,03778   |
| TcCLB.508269.40  | hypothetical protein, conserved                                    | -0,3081 | 0,1032    |
| TcCLB.506855.370 | hypothetical protein, conserved                                    | -0,3082 | 0,00539   |
| TcCLB.509065.90  | hypothetical protein, conserved                                    | -0,3083 | 0,0008372 |
| TcCLB.508347.130 | deoxyhypusine hydroxylase, putative                                | -0,3083 | 0,03602   |
| TcCLB.507641.210 | T-lymphocyte triggering factor, putative                           | -0,3084 | 0,0003807 |
| TcCLB.506289.160 | hypothetical protein                                               | -0,3084 | 0,09528   |
| TcCLB.508163.380 | trans-sialidase (pseudogene), putative                             | -0,3086 | 0,3648    |
| TcCLB.511255.529 | surface protease GP63 (pseudogene), putative                       | -0,3087 | 0,2259    |
| TcCLB.509085.90  | retrotransposon hot spot protein (RHS, pseudogene), putative       | -0,3089 | 0,1434    |
| TcCLB.509939.10  | hypothetical protein, conserved                                    | -0,3092 | 0,0008606 |
| TcCLB.509611.40  | hypothetical protein, conserved                                    | -0,3093 | 0,2212    |
| TcCLB.508593.40  | hypothetical protein, conserved                                    | -0,3095 | 0,01583   |
| TcCLB.506865.60  | hypothetical protein, conserved                                    | -0,3096 | 0,0002922 |
| TcCLB.507639.110 | hypothetical protein, conserved                                    | -0,3096 | 0,006658  |
| TcCLB.458153.10  | serine/threonine protein phosphatase, putative (fragment)          | -0,3096 | 0,05362   |
| TcCLB.507809.110 | hypothetical protein, conserved                                    | -0,3098 | 0,005033  |
| TcCLB.510291.40  | serine/threonine protein kinase, putative                          | -0,3098 | 0,08428   |
| TcCLB.506795.60  | hypothetical protein, conserved                                    | -0,3099 | 0,0008704 |
| TcCLB.511665.60  | trans-sialidase (pseudogene), putative                             | -0,3099 | 0,002199  |
| TcCLB.506763.4   | surface protease GP63 (pseudogene), putative                       | -0,3099 | 0,2054    |
| TcCLB.511555.60  | ubiquitin ligase, putative                                         | -0,3101 | 9,293E-07 |
| TcCLB.511041.20  | hypothetical protein, conserved                                    | -0,3101 | 0,0001474 |
| TcCLB.511353.69  | oxidoreductase-protein, putative                                   | -0,3101 | 0,1168    |
| TcCLB.508433.210 | mucin TcMUCII (pseudogene), putative                               | -0,3101 | 0,387     |
| TcCLB.508627.21  | retrotransposon hot spot protein (RHS, pseudogene), putative       | -0,3102 | 0,2152    |
| TcCLB.503579.130 | hypothetical protein, conserved                                    | -0,3103 | 0,01247   |
| TcCLB.508661.50  | ribonuclease H, putative                                           | -0,3104 | 0,03053   |

|                   |                                                         |         |            |
|-------------------|---------------------------------------------------------|---------|------------|
| TcCLB.506637.50   | hypothetical protein, conserved                         | -0,3104 | 0,03078    |
| TcCLB.507647.39   | hypothetical protein, conserved                         | -0,3105 | 0,1003     |
| TcCLB.411915.10   | glycine dehydrogenase [decarboxylating] (pseudogene), p | -0,3105 | 0,258      |
| TcCLB.510409.50   | hypothetical protein, conserved                         | -0,3106 | 0,02998    |
| TcCLB.507669.50   | hypothetical protein, conserved                         | -0,3107 | 0,00002234 |
| TcCLB.508175.30   | hypothetical protein, conserved                         | -0,3107 | 0,04364    |
| TcCLB.506993.140  | hypothetical protein                                    | -0,3107 | 0,3959     |
| TcCLB.503675.40   | hypothetical protein, conserved                         | -0,3108 | 0,006701   |
| TcCLB.509617.30   | mismatch repair protein MSH5, putative                  | -0,3108 | 0,02016    |
| TcCLB.506243.135  | hypothetical protein, conserved (pseudogene)            | -0,3108 | 0,1872     |
| TcCLB.506399.10   | sigma-adaptin 3, putative                               | -0,3109 | 0,3428     |
| TcCLB.511611.5    | mucin TcMUCII (pseudogene), putative                    | -0,311  | 0,5498     |
| TcCLB.507067.30   | mucin-associated surface protein (MASP, pseudogene), p  | -0,3112 | 0,1193     |
| TcCLB.508173.80   | hypothetical protein, conserved                         | -0,3118 | 0,0004084  |
| TcCLB.505009.10   | hypothetical protein, conserved                         | -0,3118 | 0,01574    |
| TcCLB.503989.60   | protein phosphatase 2C, putative (fragment)             | -0,3118 | 0,02912    |
| TcCLB.508491.9    | hypothetical protein, conserved                         | -0,3118 | 0,1002     |
| TcCLB.511283.180  | hypothetical protein, conserved                         | -0,3119 | 0,0002851  |
| TcCLB.504149.90   | hypothetical protein, conserved                         | -0,3119 | 0,0003425  |
| TcCLB.509491.10   | hypothetical protein, conserved                         | -0,3119 | 0,01831    |
| TcCLB.511277.250  | hypothetical protein, conserved                         | -0,3121 | 0,0003745  |
| TcCLB.504173.60   | hypothetical protein, conserved                         | -0,3121 | 0,001766   |
| TcCLB.503775.10   | surface protease GP63 (pseudogene), putative            | -0,3126 | 0,194      |
| TcCLB.510525.60   | hypothetical protein, conserved                         | -0,3128 | 0,01516    |
| TcCLB.510121.30   | actin-like protein, putative                            | -0,3128 | 0,0373     |
| TcCLB.506355.120  | hypothetical protein, conserved                         | -0,3131 | 0,0003182  |
| TcCLB.508625.80   | hypothetical protein, conserved                         | -0,3132 | 0,006246   |
| TcCLB.507611.300  | U1A small nuclear ribonucleoprotein, putative           | -0,3132 | 0,06406    |
| TcCLB.506475.80   | WD40 repeat-containing protein                          | -0,3133 | 0,0001296  |
| TcCLB.509453.10   | hypothetical protein, conserved                         | -0,3134 | 0,003267   |
| TcCLB.507949.120  | Transmembrane protein 231, putative                     | -0,3134 | 0,005137   |
| TcCLB.506213.30   | hypothetical protein, conserved                         | -0,3137 | 0,0455     |
| TcCLB.507941.14   | hypothetical protein, conserved                         | -0,3137 | 0,1752     |
| TcCLB.503855.30   | adenylosuccinate lyase, putative (ADSL)                 | -0,314  | 0,0003016  |
| TcCLB.508221.1050 | trans-sialidase, putative                               | -0,3141 | 0,2778     |
| TcCLB.511711.100  | hypothetical protein, conserved                         | -0,3142 | 0,00475    |
| TcCLB.507501.5    | trans-sialidase, putative (fragment)                    | -0,3143 | 0,5324     |
| TcCLB.507647.30   | hypothetical protein, conserved                         | -0,3144 | 0,09145    |
| TcCLB.504053.10   | hypothetical protein, conserved (pseudogene)            | -0,3146 | 0,0002076  |
| TcCLB.507357.110  | hypothetical protein, conserved (pseudogene)            | -0,3146 | 0,4359     |
| TcCLB.504057.104  | phosphatidylinositol phosphate kinase alpha (PIPKA)     | -0,3147 | 0,00616    |
| TcCLB.508177.64   | hypothetical protein, conserved                         | -0,3147 | 0,01054    |
| TcCLB.506605.220  | hypothetical protein, conserved                         | -0,3149 | 0,005778   |
| TcCLB.510889.130  | hypothetical protein                                    | -0,3149 | 0,09089    |
| TcCLB.506367.160  | hypothetical protein, conserved                         | -0,3151 | 0,005041   |

|                  |                                                          |         |            |
|------------------|----------------------------------------------------------|---------|------------|
| TcCLB.510565.110 | hypothetical protein                                     | -0,3154 | 0,07567    |
| TcCLB.509161.30  | OSM3-like kinesin, putative                              | -0,3155 | 0,000146   |
| TcCLB.510729.60  | hypothetical protein, conserved                          | -0,3155 | 0,05107    |
| TcCLB.510187.520 | hypothetical protein, conserved                          | -0,3156 | 0,009233   |
| TcCLB.509399.20  | metacaspase, putative                                    | -0,3159 | 0,04836    |
| TcCLB.508919.20  | hypothetical protein, conserved                          | -0,316  | 0,0004354  |
| TcCLB.508797.10  | tubulin-tyrosine ligase-like protein, putative           | -0,316  | 0,0006591  |
| TcCLB.506941.250 | hypothetical protein, conserved                          | -0,3161 | 0,003479   |
| TcCLB.506725.10  | hypothetical protein, conserved                          | -0,3161 | 0,01081    |
| TcCLB.508125.22  | mucin TcMUCII (pseudogene), putative                     | -0,3161 | 0,3098     |
| TcCLB.508221.460 | mucin-associated surface protein (MASP, pseudogene), pu  | -0,3162 | 0,3057     |
| TcCLB.508643.40  | hypothetical protein, conserved                          | -0,3163 | 0,00005857 |
| TcCLB.508051.20  | hypothetical protein, conserved                          | -0,3163 | 0,002587   |
| TcCLB.508507.30  | calcium uniporter protein, mitochondrial, putative       | -0,3163 | 0,02994    |
| TcCLB.508257.244 | hypothetical protein, conserved                          | -0,3164 | 0,06353    |
| TcCLB.507993.210 | hypothetical protein, conserved                          | -0,3166 | 0,001943   |
| TcCLB.508461.300 | hypothetical protein, conserved                          | -0,3167 | 0,001974   |
| TcCLB.510763.80  | DNA polymerase epsilon subunit B, putative               | -0,3167 | 0,01275    |
| TcCLB.503945.40  | 6-phosphogluconolactonase, putative                      | -0,3167 | 0,04428    |
| TcCLB.510565.141 | hypothetical protein, conserved                          | -0,3168 | 0,06316    |
| TcCLB.508943.30  | RNA-binding protein, putative                            | -0,317  | 0,01126    |
| TcCLB.509977.15  | surface protease GP63 (pseudogene), putative             | -0,317  | 0,1909     |
| TcCLB.509065.150 | hypothetical protein, conserved                          | -0,3171 | 0,01253    |
| TcCLB.504167.7   | hypothetical protein, conserved                          | -0,3172 | 0,07593    |
| TcCLB.419417.10  | hypothetical protein, conserved                          | -0,3172 | 0,1903     |
| TcCLB.508493.110 | mucin-associated surface protein (MASP), putative        | -0,3173 | 0,1037     |
| TcCLB.506635.120 | kinesin, putative                                        | -0,3174 | 0,001447   |
| TcCLB.510661.220 | hypothetical protein, conserved                          | -0,3174 | 0,008872   |
| TcCLB.511557.70  | hypothetical protein, conserved                          | -0,3175 | 0,0002051  |
| TcCLB.509961.30  | hypothetical protein, conserved                          | -0,3175 | 0,00317    |
| TcCLB.506475.14  | phosphatidylinositol 3-kinase, putative                  | -0,3175 | 0,007231   |
| TcCLB.509287.150 | retrotransposon hot spot protein (RHS, pseudogene), puta | -0,3178 | 0,004748   |
| TcCLB.509105.140 | heat shock protein 85, putative                          | -0,3178 | 0,0056     |
| TcCLB.509047.50  | metallo-beta-lactamase superfamily, putative             | -0,3178 | 0,03729    |
| TcCLB.510963.20  | hypothetical protein, conserved                          | -0,3182 | 0,002749   |
| TcCLB.508439.30  | hypothetical protein, conserved                          | -0,3183 | 0,003814   |
| TcCLB.511803.20  | A/G-specific adenine glycosylase, putative               | -0,3184 | 0,004819   |
| TcCLB.511667.140 | trans-sialidase (pseudogene), putative                   | -0,3185 | 0,01251    |
| TcCLB.506315.40  | hypothetical protein, conserved                          | -0,3187 | 0,0006827  |
| TcCLB.506755.70  | hypothetical protein, conserved                          | -0,3187 | 0,0102     |
| TcCLB.510729.150 | tubulin tyrosine ligase, putative                        | -0,3188 | 0,0005292  |
| TcCLB.511287.20  | hypothetical protein, conserved                          | -0,3188 | 0,001936   |
| TcCLB.510101.460 | hypothetical protein, conserved                          | -0,3189 | 0,004617   |
| TcCLB.507515.100 | hypothetical protein, conserved                          | -0,3189 | 0,09617    |
| TcCLB.507093.130 | hypothetical protein, conserved                          | -0,3192 | 0,0008898  |

|                  |                                                          |         |            |
|------------------|----------------------------------------------------------|---------|------------|
| TcCLB.508343.10  | trans-sialidase, putative                                | -0,3193 | 0,6293     |
| TcCLB.510293.79  | GPI transamidase component Tta2, putative (fragment) (   | -0,3197 | 0,01393    |
| TcCLB.503521.10  | hypothetical protein                                     | -0,3198 | 0,001756   |
| TcCLB.510533.60  | hypothetical protein, conserved                          | -0,3198 | 0,01926    |
| TcCLB.508999.127 | mucin-associated surface protein (MASP, pseudogene), pi  | -0,3198 | 0,314      |
| TcCLB.506287.150 | GTP-binding protein, putative                            | -0,3199 | 0,001467   |
| TcCLB.511523.10  | GTPase activating protein of Rab-like GTPase, putative   | -0,3199 | 0,01182    |
| TcCLB.508213.40  | hypothetical protein, conserved                          | -0,3199 | 0,03709    |
| TcCLB.508405.100 | hypothetical protein, conserved                          | -0,32   | 0,03216    |
| TcCLB.504105.10  | hypothetical protein, conserved                          | -0,3201 | 0,01027    |
| TcCLB.509965.240 | hypothetical protein, conserved                          | -0,3201 | 0,01029    |
| TcCLB.509871.21  | N-acetyltransferase complex ARD1 subunit (pseudogene),   | -0,3202 | 0,5295     |
| TcCLB.506333.19  | kinesin, putative (fragment)                             | -0,3203 | 0,0002769  |
| TcCLB.507993.300 | hypothetical protein, conserved                          | -0,3203 | 0,0261     |
| TcCLB.506159.10  | retrotransposon hot spot protein (RHS, pseudogene), puta | -0,3204 | 0,02906    |
| TcCLB.510523.29  | hypothetical protein, conserved (fragment)               | -0,3205 | 0,05827    |
| TcCLB.506529.490 | hypothetical protein, conserved                          | -0,3207 | 0,007343   |
| TcCLB.503781.10  | hypothetical protein, conserved                          | -0,3208 | 0,0001259  |
| TcCLB.506249.50  | hypothetical protein, conserved                          | -0,3209 | 0,05185    |
| TcCLB.508659.50  | serine/threonine protein kinase, putative                | -0,3209 | 0,05206    |
| TcCLB.509005.30  | hypothetical protein, conserved                          | -0,321  | 0,007531   |
| TcCLB.508489.30  | hypothetical protein, conserved                          | -0,3212 | 0,009646   |
| TcCLB.506633.20  | hypothetical protein, conserved                          | -0,3215 | 0,002522   |
| TcCLB.506765.10  | retrotransposon hot spot protein (RHS, pseudogene), puta | -0,3216 | 0,1648     |
| TcCLB.511183.570 | syntaxin binding protein (pseudogene), putative          | -0,3216 | 0,3333     |
| TcCLB.511019.54  | ATP-dependent DEAD/H RNA helicase (pseudogene), puta     | -0,3217 | 0,2847     |
| TcCLB.507053.130 | hypothetical protein, conserved                          | -0,322  | 0,003345   |
| TcCLB.503679.30  | hypothetical protein, conserved                          | -0,322  | 0,01317    |
| TcCLB.507639.70  | hypothetical protein, conserved                          | -0,3222 | 0,03286    |
| TcCLB.511143.39  | hypothetical protein, conserved                          | -0,3223 | 0,04992    |
| TcCLB.510091.14  | hypothetical protein, conserved                          | -0,3223 | 0,06661    |
| TcCLB.508707.227 | ATP binding protein-like protein, putative               | -0,3224 | 0,02848    |
| TcCLB.507945.20  | hypothetical protein, conserved                          | -0,3225 | 0,0171     |
| TcCLB.509971.90  | trans-sialidase, putative (fragment)                     | -0,3225 | 0,3319     |
| TcCLB.504125.60  | Kinesin-13 3, putative (KIN13-3)                         | -0,3227 | 0,00001668 |
| TcCLB.503727.29  | hypothetical protein                                     | -0,3227 | 0,003712   |
| TcCLB.510731.100 | hypothetical protein, conserved                          | -0,3227 | 0,01635    |
| TcCLB.511019.60  | hypothetical protein, conserved (pseudogene)             | -0,3228 | 0,0083     |
| TcCLB.507011.110 | hypothetical protein                                     | -0,3228 | 0,01418    |
| TcCLB.509319.10  | hypothetical protein, conserved                          | -0,3232 | 0,008985   |
| TcCLB.508347.110 | hypothetical protein, conserved                          | -0,3232 | 0,02862    |
| TcCLB.504397.20  | surface protease GP63, putative                          | -0,3232 | 0,1436     |
| TcCLB.506211.114 | C-terminal motor kinesin, putative                       | -0,3234 | 0,0000184  |
| TcCLB.506793.30  | kinesin, putative                                        | -0,3234 | 0,0002519  |
| TcCLB.508647.100 | hypothetical protein, conserved                          | -0,3238 | 0,0003168  |

|                  |                                                          |         |           |
|------------------|----------------------------------------------------------|---------|-----------|
| TcCLB.508163.120 | mucin-associated surface protein (MASP, pseudogene), p   | -0,3238 | 0,08969   |
| TcCLB.506925.220 | hypothetical protein, conserved                          | -0,3241 | 0,008792  |
| TcCLB.509671.164 | hypothetical protein, conserved                          | -0,3243 | 0,01591   |
| TcCLB.503747.30  | hypothetical protein                                     | -0,3243 | 0,02671   |
| TcCLB.505999.24  | hypothetical protein, conserved                          | -0,3243 | 0,03724   |
| TcCLB.503911.10  | hypothetical protein                                     | -0,3243 | 0,2643    |
| TcCLB.510295.50  | protein kinase, putative                                 | -0,3244 | 0,007163  |
| TcCLB.506753.210 | hypothetical protein, conserved                          | -0,3248 | 0,0203    |
| TcCLB.504119.20  | hypothetical protein, conserved                          | -0,3251 | 0,001893  |
| TcCLB.511273.59  | 5-oxoprolinase, putative                                 | -0,3251 | 0,00248   |
| TcCLB.509287.80  | trans-sialidase, Group VII, putative                     | -0,3251 | 0,003126  |
| TcCLB.506879.109 | protein kinase, putative                                 | -0,3251 | 0,04683   |
| TcCLB.511671.120 | U5 snRNP-specific 40 kDa protein, putative               | -0,3252 | 0,008655  |
| TcCLB.432067.20  | hypothetical protein, conserved (pseudogene)             | -0,3252 | 0,1794    |
| TcCLB.509875.180 | hypothetical protein                                     | -0,3253 | 0,05456   |
| TcCLB.511861.7   | elongation factor 1-gamma (EF-1-gamma), putative         | -0,3253 | 0,3279    |
| TcCLB.511633.50  | hypothetical protein, conserved                          | -0,3254 | 0,0003951 |
| TcCLB.511887.30  | trans-sialidase (pseudogene), putative                   | -0,3257 | 0,04628   |
| TcCLB.509979.187 | surface protease GP63 (pseudogene), putative             | -0,3257 | 0,2624    |
| TcCLB.505965.20  | hypothetical protein, conserved                          | -0,3259 | 0,008761  |
| TcCLB.507957.140 | trans-sialidase (pseudogene), putative                   | -0,3259 | 0,04225   |
| TcCLB.506213.20  | hypothetical protein, conserved                          | -0,3261 | 0,02696   |
| TcCLB.506211.80  | hypothetical protein, conserved                          | -0,3262 | 0,007184  |
| TcCLB.506941.100 | hypothetical protein, conserved                          | -0,3263 | 0,000247  |
| TcCLB.511361.80  | hypothetical protein, conserved                          | -0,3267 | 0,01564   |
| TcCLB.507993.120 | synaptotagmin, putative                                  | -0,3267 | 0,03813   |
| TcCLB.506783.30  | elongation factor 1-gamma (EF-1-gamma), putative         | -0,3268 | 0,2365    |
| TcCLB.509753.10  | hypothetical protein, conserved (pseudogene)             | -0,3269 | 0,3414    |
| TcCLB.511145.89  | hypothetical protein, conserved                          | -0,327  | 0,03699   |
| TcCLB.506733.60  | N(2), N(2)-dimethylguanosine tRNA methyltransferase, p   | -0,3273 | 0,001993  |
| TcCLB.511903.230 | hypothetical protein, conserved                          | -0,3277 | 0,006972  |
| TcCLB.508693.60  | hypothetical protein, conserved                          | -0,3277 | 0,01358   |
| TcCLB.510719.120 | hypothetical protein, conserved                          | -0,328  | 0,0005653 |
| TcCLB.507785.20  | proteasome subunit alpha type-1, putative (fragment) (PS | -0,3282 | 0,3814    |
| TcCLB.503419.60  | Enriched in surface-labeled proteome protein 15 (ESP15)  | -0,3283 | 0,001338  |
| TcCLB.510825.10  | hypothetical protein, conserved                          | -0,3284 | 0,008564  |
| TcCLB.503573.9   | ATP-binding cassette transporter ABCA1, putative (ABCA1  | -0,3285 | 0,03589   |
| TcCLB.503981.20  | hypothetical protein, conserved                          | -0,3286 | 0,02492   |
| TcCLB.511451.110 | hypothetical protein, conserved (pseudogene)             | -0,3286 | 0,3363    |
| TcCLB.508479.380 | hypothetical protein, conserved                          | -0,3287 | 0,001709  |
| TcCLB.511587.120 | Octanoyltransferase, putative                            | -0,3287 | 0,1867    |
| TcCLB.510089.170 | casein kinase I, putative                                | -0,329  | 0,02632   |
| TcCLB.510533.220 | hypothetical protein, conserved                          | -0,3291 | 0,001431  |
| TcCLB.504229.100 | trans-sialidase (pseudogene), putative                   | -0,3291 | 0,06124   |
| TcCLB.506733.20  | AMP deaminase, putative                                  | -0,3293 | 0,0002368 |



|                  |                                                          |         |           |
|------------------|----------------------------------------------------------|---------|-----------|
| TcCLB.507093.90  | hypothetical protein, conserved                          | -0,3294 | 0,00211   |
| TcCLB.511173.440 | trans-sialidase, Group V, putative                       | -0,3294 | 0,1298    |
| TcCLB.506239.60  | hypothetical protein, conserved                          | -0,3295 | 0,02658   |
| TcCLB.506563.90  | calpain-like cysteine peptidase (pseudogene), putative   | -0,3295 | 0,03449   |
| TcCLB.511367.30  | hypothetical protein                                     | -0,3295 | 0,2897    |
| TcCLB.503813.10  | hypothetical protein, conserved                          | -0,3298 | 0,000972  |
| TcCLB.416883.9   | hypothetical protein, conserved (fragment)               | -0,3298 | 0,01417   |
| TcCLB.506747.30  | ubiquitin hydrolase, putative                            | -0,3299 | 0,0002028 |
| TcCLB.506859.100 | hypothetical protein, conserved                          | -0,3299 | 0,1076    |
| TcCLB.509967.180 | hypothetical protein, conserved                          | -0,3301 | 0,003972  |
| TcCLB.506253.11  | hypothetical protein, conserved (pseudogene)             | -0,3301 | 0,1256    |
| TcCLB.506789.270 | hypothetical protein, conserved                          | -0,3302 | 0,0001702 |
| TcCLB.504149.220 | retrotransposon hot spot protein (RHS, pseudogene), puta | -0,3302 | 0,005584  |
| TcCLB.507839.9   | Myotubularin-related protein, putative (fragment)        | -0,3304 | 0,03947   |
| TcCLB.510025.80  | hypothetical protein, conserved (pseudogene)             | -0,3304 | 0,06407   |
| TcCLB.506315.90  | serine/threonine protein kinase, putative                | -0,3305 | 0,0007321 |
| TcCLB.511903.240 | hypothetical protein, conserved                          | -0,3305 | 0,0009035 |
| TcCLB.511583.30  | hypothetical protein, conserved                          | -0,3306 | 0,01039   |
| TcCLB.510283.60  | hypothetical protein, conserved                          | -0,3306 | 0,03227   |
| TcCLB.503581.20  | PPlase, putative                                         | -0,3307 | 0,04093   |
| TcCLB.506885.380 | hypothetical protein, conserved                          | -0,3308 | 0,004933  |
| TcCLB.505183.160 | hypothetical protein, conserved                          | -0,3308 | 0,006374  |
| TcCLB.509617.89  | Zn-finger protein, putative (fragment)                   | -0,3308 | 0,006415  |
| TcCLB.510743.90  | hypothetical protein, conserved                          | -0,3311 | 0,009402  |
| TcCLB.511423.170 | chaperone DNAJ protein, putative                         | -0,3311 | 0,0217    |
| TcCLB.508819.30  | hypothetical protein, conserved                          | -0,3313 | 0,003696  |
| TcCLB.508873.514 | mucin TcMUC (pseudogene), putative                       | -0,3314 | 0,2775    |
| TcCLB.509799.130 | hypothetical protein, conserved                          | -0,3315 | 0,0003168 |
| TcCLB.506855.300 | hypothetical protein, conserved                          | -0,3315 | 0,001423  |
| TcCLB.510317.34  | unspecified product                                      | -0,3315 | 0,1652    |
| TcCLB.503973.64  | hypothetical protein, conserved (pseudogene)             | -0,3316 | 0,3649    |
| TcCLB.504045.80  | hypothetical protein, conserved                          | -0,3317 | 0,014     |
| TcCLB.509617.70  | subtilisin-like serine peptidase, putative               | -0,3318 | 0,0004826 |
| TcCLB.510421.264 | hypothetical protein, conserved                          | -0,3318 | 0,07338   |
| TcCLB.510755.40  | hypothetical protein, conserved                          | -0,3321 | 0,0251    |
| TcCLB.511923.40  | hypothetical protein, conserved (pseudogene)             | -0,3321 | 0,1086    |
| TcCLB.506799.10  | fatty acid transporter protein-like, putative            | -0,3323 | 0,000438  |
| TcCLB.506575.20  | hypothetical protein, conserved                          | -0,3323 | 0,1594    |
| TcCLB.510379.20  | hypothetical protein (fragment)                          | -0,3323 | 0,2787    |
| TcCLB.507991.110 | hypothetical protein, conserved                          | -0,3324 | 0,001891  |
| TcCLB.510617.19  | hypothetical protein, conserved                          | -0,3327 | 0,01583   |
| TcCLB.510723.20  | hypothetical protein                                     | -0,3328 | 0,0007389 |
| TcCLB.506435.370 | surface protease GP63, putative                          | -0,3329 | 0,01928   |
| TcCLB.509399.9   | helicase, putative                                       | -0,333  | 0,001059  |
| TcCLB.508257.50  | actin-like protein, putative                             | -0,333  | 0,01962   |

|                  |                                                         |         |           |
|------------------|---------------------------------------------------------|---------|-----------|
| TcCLB.509073.90  | hypothetical protein, conserved                         | -0,3331 | 0,001492  |
| TcCLB.503919.20  | hypothetical protein, conserved                         | -0,3331 | 0,05809   |
| TcCLB.503583.20  | hypothetical protein, conserved                         | -0,3332 | 0,01453   |
| TcCLB.506811.110 | hypothetical protein, conserved                         | -0,3334 | 0,0002541 |
| TcCLB.507793.40  | hypothetical protein, conserved                         | -0,3337 | 0,02302   |
| TcCLB.503879.10  | DNA polymerase delta subunit 2, putative                | -0,3339 | 0,003321  |
| TcCLB.509775.40  | iron superoxide dismutase, putative                     | -0,3339 | 0,03397   |
| TcCLB.509671.168 | hypothetical protein, conserved                         | -0,3339 | 0,06001   |
| TcCLB.503879.20  | hypothetical protein, conserved                         | -0,334  | 0,002492  |
| TcCLB.509937.140 | hypothetical protein, conserved                         | -0,3341 | 0,003702  |
| TcCLB.510657.100 | hypothetical protein, conserved                         | -0,3342 | 0,0002883 |
| TcCLB.504741.124 | hypothetical protein, conserved                         | -0,3344 | 0,1231    |
| TcCLB.505193.50  | hypothetical protein                                    | -0,3344 | 0,1547    |
| TcCLB.508963.40  | trans-sialidase (pseudogene), putative                  | -0,3345 | 0,008759  |
| TcCLB.510817.21  | hypothetical protein                                    | -0,3346 | 0,07994   |
| TcCLB.449759.9   | hypothetical protein, conserved                         | -0,3347 | 0,02204   |
| TcCLB.511545.100 | hypothetical protein, conserved                         | -0,3349 | 0,0001544 |
| TcCLB.504011.60  | hypothetical protein, conserved                         | -0,3349 | 0,004172  |
| TcCLB.507951.290 | hypothetical protein, conserved                         | -0,335  | 0,04862   |
| TcCLB.506885.300 | hypothetical protein, conserved                         | -0,3352 | 0,02818   |
| TcCLB.508479.160 | hypothetical protein, conserved                         | -0,3353 | 0,0001134 |
| TcCLB.511881.10  | GCN5-like protein, putative                             | -0,3353 | 0,1166    |
| TcCLB.511031.40  | hypothetical protein, conserved                         | -0,3354 | 0,01222   |
| TcCLB.511461.10  | hypothetical protein, conserved                         | -0,3354 | 0,01372   |
| TcCLB.503897.80  | deaminase, putative                                     | -0,3354 | 0,02699   |
| TcCLB.508207.31  | hypothetical protein                                    | -0,3358 | 0,02436   |
| TcCLB.509453.30  | GCN5-like protein, putative                             | -0,3359 | 0,04922   |
| TcCLB.508625.50  | 6-phosphofructo-2-kinase/fructose-2,6-bisphosphatas, pu | -0,336  | 0,007822  |
| TcCLB.509143.10  | hypothetical protein, conserved                         | -0,3362 | 0,00026   |
| TcCLB.510629.80  | trans-sialidase (pseudogene), putative                  | -0,3363 | 0,458     |
| TcCLB.506265.70  | hypothetical protein, conserved                         | -0,3365 | 0,001486  |
| TcCLB.511287.180 | Associated kinase of Tb14-3-3, putative (AKB1)          | -0,3369 | 0,06902   |
| TcCLB.511383.20  | kinesin, putative                                       | -0,337  | 0,0009761 |
| TcCLB.448387.9   | hypothetical protein, conserved                         | -0,337  | 0,006254  |
| TcCLB.503723.80  | hypothetical protein, conserved                         | -0,3371 | 0,00458   |
| TcCLB.509655.20  | hypothetical protein, conserved (pseudogene)            | -0,3371 | 0,1441    |
| TcCLB.508793.30  | palmitoyl acyltransferase 8, putative                   | -0,3372 | 0,02848   |
| TcCLB.506811.100 | hypothetical protein, conserved                         | -0,3373 | 0,006772  |
| TcCLB.506483.60  | hypothetical protein, conserved                         | -0,3373 | 0,01002   |
| TcCLB.510623.80  | trans-sialidase (pseudogene), putative                  | -0,3375 | 0,1881    |
| TcCLB.508257.60  | hypothetical protein, conserved                         | -0,3376 | 0,01908   |
| TcCLB.505807.130 | hypothetical protein, conserved                         | -0,3377 | 0,1361    |
| TcCLB.508939.40  | hypothetical protein                                    | -0,3377 | 0,3437    |
| TcCLB.510359.60  | hypothetical protein, conserved                         | -0,3379 | 0,009138  |
| TcCLB.509007.70  | hypothetical protein, conserved                         | -0,3382 | 0,0007622 |

|                  |                                                          |         |            |
|------------------|----------------------------------------------------------|---------|------------|
| TcCLB.508307.44  | hypothetical protein, conserved                          | -0,3382 | 0,0007725  |
| TcCLB.506991.19  | hypothetical protein, conserved                          | -0,3383 | 0,03809    |
| TcCLB.508495.210 | mucin-associated surface protein (MASP, pseudogene), pu  | -0,3384 | 0,2619     |
| TcCLB.509737.19  | retrotransposon hot spot protein (RHS, pseudogene), puta | -0,3386 | 0,1416     |
| TcCLB.506413.89  | trans-sialidase, putative                                | -0,3389 | 0,0004565  |
| TcCLB.511725.140 | mitochondrial carrier protein, putative                  | -0,3389 | 0,002169   |
| TcCLB.507993.160 | UDP-galactopyranose mutase (GLF)                         | -0,339  | 0,001154   |
| TcCLB.510241.40  | hypothetical protein, conserved                          | -0,339  | 0,005294   |
| TcCLB.511511.100 | hypothetical protein, conserved                          | -0,3393 | 0,00002341 |
| TcCLB.506341.20  | hypothetical protein, conserved                          | -0,3394 | 0,0247     |
| TcCLB.506123.30  | protein kinase, putative                                 | -0,3396 | 0,00004272 |
| TcCLB.511151.30  | hypothetical protein, conserved                          | -0,3397 | 0,02575    |
| TcCLB.504115.50  | retrotransposon hot spot protein (RHS, pseudogene), puta | -0,3397 | 0,04525    |
| TcCLB.507467.119 | hypothetical protein, conserved                          | -0,3398 | 0,01828    |
| TcCLB.503971.5   | hypothetical protein, conserved                          | -0,3398 | 0,2841     |
| TcCLB.511173.241 | mucin TcMUCII (pseudogene), putative                     | -0,3398 | 0,2887     |
| TcCLB.511131.50  | U4/U6 small nuclear ribonuclear protein, putative        | -0,3399 | 0,0007451  |
| TcCLB.506337.40  | glycosyl transferase-like protein, putative              | -0,34   | 0,01265    |
| TcCLB.507709.110 | hypothetical protein, conserved                          | -0,34   | 0,06577    |
| TcCLB.507357.50  | hypothetical protein                                     | -0,3401 | 0,2853     |
| TcCLB.511283.190 | U2 small nuclear ribonucleoprotein 40K, putative         | -0,3404 | 0,0007975  |
| TcCLB.511683.30  | hypothetical protein, conserved                          | -0,3405 | 0,0005535  |
| TcCLB.510165.90  | trans-sialidase (pseudogene), putative                   | -0,3406 | 0,06992    |
| TcCLB.508295.40  | mucin-associated surface protein (MASP), putative        | -0,3411 | 0,4005     |
| TcCLB.506317.30  | hypothetical protein, conserved (pseudogene)             | -0,3414 | 0,001631   |
| TcCLB.508357.20  | hypothetical protein, conserved                          | -0,3414 | 0,05596    |
| TcCLB.511217.50  | hypothetical protein, conserved                          | -0,3415 | 0,00001623 |
| TcCLB.510609.120 | hypothetical protein, conserved                          | -0,3417 | 0,0005745  |
| TcCLB.510059.10  | dispersed gene family protein 1 (DGF-1), putative        | -0,3418 | 0,3582     |
| TcCLB.503663.4   | hypothetical protein, conserved (fragment)               | -0,3419 | 0,02738    |
| TcCLB.509297.10  | hypothetical protein, conserved                          | -0,342  | 0,01853    |
| TcCLB.503879.90  | hypothetical protein, conserved                          | -0,3421 | 0,0006992  |
| TcCLB.506559.310 | hypothetical protein, conserved                          | -0,3422 | 0,0004151  |
| TcCLB.511733.110 | GTPase activating protein of Rab-like GTPase, putative   | -0,3422 | 0,002437   |
| TcCLB.506361.44  | mucin TcMUC (pseudogene), putative                       | -0,3423 | 0,1349     |
| TcCLB.504153.290 | hypothetical protein, conserved                          | -0,3424 | 0,00172    |
| TcCLB.509893.29  | hypothetical protein, conserved                          | -0,3424 | 0,0209     |
| TcCLB.507099.110 | hypothetical protein, conserved                          | -0,3425 | 0,002823   |
| TcCLB.506565.4   | RNA-binding protein, putative                            | -0,3425 | 0,1956     |
| TcCLB.506583.4   | serine/threonine protein kinase, putative                | -0,3428 | 0,02083    |
| TcCLB.506715.50  | SNARE domain-containing protein, putative (SNARE2.2)     | -0,343  | 0,001539   |
| TcCLB.503885.80  | hypothetical protein, conserved                          | -0,343  | 0,003341   |
| TcCLB.509073.60  | hypothetical protein, conserved                          | -0,343  | 0,006046   |
| TcCLB.509157.250 | hypothetical protein, conserved                          | -0,3432 | 0,0003319  |
| TcCLB.508235.20  | mucin TcMUCIII, putative                                 | -0,3432 | 0,05394    |

|                  |                                                          |         |            |
|------------------|----------------------------------------------------------|---------|------------|
| TcCLB.506605.170 | inosine-guanine nucleoside hydrolase, putative (IG-NH)   | -0,3433 | 0,002582   |
| TcCLB.508051.40  | hypothetical protein, conserved                          | -0,3433 | 0,01267    |
| TcCLB.510647.69  | hypothetical protein, conserved                          | -0,3434 | 0,1509     |
| TcCLB.511761.80  | hypothetical protein                                     | -0,3437 | 0,001032   |
| TcCLB.506451.35  | hypothetical protein                                     | -0,3437 | 0,1611     |
| TcCLB.508875.10  | hypothetical protein (fragment)                          | -0,3437 | 0,2763     |
| TcCLB.508969.40  | dispersed gene family protein 1 (DGF-1), putative        | -0,3439 | 0,3119     |
| TcCLB.506249.20  | protein transport protein Sec23A, putative               | -0,344  | 0,00007948 |
| TcCLB.511367.220 | hypothetical protein, conserved                          | -0,3441 | 0,002094   |
| TcCLB.508919.110 | hypothetical protein, conserved                          | -0,3441 | 0,03006    |
| TcCLB.509847.10  | retrotransposon hot spot protein (RHS, pseudogene), puta | -0,3444 | 0,1174     |
| TcCLB.510187.340 | hypothetical protein, conserved                          | -0,3445 | 0,0006516  |
| TcCLB.509085.20  | retrotransposon hot spot protein (RHS, pseudogene), puta | -0,3447 | 0,377      |
| TcCLB.507001.50  | hypothetical protein, conserved                          | -0,3448 | 0,0002118  |
| TcCLB.511735.34  | hypothetical protein, conserved                          | -0,3449 | 0,01886    |
| TcCLB.509599.20  | hypothetical protein, conserved (fragment)               | -0,3451 | 0,00889    |
| TcCLB.507515.120 | sphingosine kinase A, B, putative                        | -0,3453 | 0,0008444  |
| TcCLB.508153.510 | serine/threonine-protein kinase Nek, putative            | -0,3453 | 0,001433   |
| TcCLB.507041.76  | hypothetical protein, conserved (pseudogene)             | -0,3453 | 0,02442    |
| TcCLB.508891.90  | hypothetical protein, conserved                          | -0,3454 | 0,000593   |
| TcCLB.509805.80  | hypothetical protein, conserved                          | -0,3456 | 0,003168   |
| TcCLB.507241.39  | ABC transporter, putative                                | -0,3458 | 0,0003336  |
| TcCLB.508711.49  | hypothetical protein, conserved                          | -0,3465 | 0,00007344 |
| TcCLB.510031.60  | methionyl-tRNA formyltransferase, putative               | -0,3465 | 0,001326   |
| TcCLB.511021.99  | hypothetical protein, conserved                          | -0,3465 | 0,03254    |
| TcCLB.509895.70  | hypothetical protein, conserved                          | -0,3465 | 0,1438     |
| TcCLB.511283.90  | N-myristoyl transferase, putative                        | -0,3469 | 0,00268    |
| TcCLB.510423.40  | hypothetical protein, conserved                          | -0,347  | 0,00003903 |
| TcCLB.503987.50  | hypothetical protein, conserved                          | -0,347  | 0,003361   |
| TcCLB.506925.490 | hypothetical protein, conserved                          | -0,347  | 0,00991    |
| TcCLB.508707.120 | hypothetical protein, conserved                          | -0,3471 | 0,0002478  |
| TcCLB.504149.80  | hypothetical protein, conserved                          | -0,3471 | 0,0003963  |
| TcCLB.506177.90  | hypothetical protein, conserved                          | -0,3473 | 0,06417    |
| TcCLB.510975.30  | hypothetical protein, conserved                          | -0,3474 | 0,0008713  |
| TcCLB.508951.29  | actin-like protein, putative                             | -0,3474 | 0,004121   |
| TcCLB.427789.39  | hypothetical protein, conserved                          | -0,3474 | 0,02012    |
| TcCLB.510499.20  | hypothetical protein                                     | -0,3477 | 0,2781     |
| TcCLB.503893.150 | hypothetical protein, conserved                          | -0,3479 | 0,009479   |
| TcCLB.509157.50  | hypothetical protein                                     | -0,348  | 0,0001353  |
| TcCLB.503789.40  | signal recognition particle (pseudogene), putative       | -0,3482 | 0,00009775 |
| TcCLB.506773.100 | protein kinase, putative                                 | -0,3482 | 0,0001206  |
| TcCLB.506865.10  | ARP2/3 complex subunit, putative                         | -0,3483 | 0,005103   |
| TcCLB.511321.4   | O-sialoglycoprotein endopeptidase, putative              | -0,3483 | 0,1252     |
| TcCLB.508265.110 | hypothetical protein, conserved                          | -0,3484 | 0,0005105  |
| TcCLB.510323.10  | protein kinase, putative                                 | -0,3484 | 0,002602   |

|                  |                                                        |         |            |
|------------------|--------------------------------------------------------|---------|------------|
| TcCLB.506869.4   | hypothetical protein, conserved                        | -0,3485 | 0,002119   |
| TcCLB.509979.330 | surface protease GP63 (pseudogene), putative           | -0,3489 | 0,04783    |
| TcCLB.510119.50  | hypothetical protein, conserved                        | -0,349  | 0,001767   |
| TcCLB.506267.75  | hypothetical protein, conserved (pseudogene)           | -0,3492 | 0,1167     |
| TcCLB.509053.40  | hypothetical protein, conserved                        | -0,3494 | 0,0005869  |
| TcCLB.510781.30  | tryptophanyl-tRNA synthetase (pseudogene), putative    | -0,3497 | 0,3853     |
| TcCLB.510761.60  | casein kinase II, putative                             | -0,3499 | 0,0007607  |
| TcCLB.510061.60  | dispersed gene family protein 1 (DGF-1), putative      | -0,3499 | 0,4843     |
| TcCLB.510741.140 | hypothetical protein, conserved                        | -0,3501 | 0,0009717  |
| TcCLB.506821.130 | hypothetical protein, conserved                        | -0,3502 | 0,00007248 |
| TcCLB.509099.30  | paraflagellar rod protein 5, putative (PFR5)           | -0,3502 | 0,003772   |
| TcCLB.507687.60  | trans-sialidase (pseudogene), putative                 | -0,3504 | 0,1862     |
| TcCLB.506833.50  | hypothetical protein, conserved                        | -0,3505 | 0,00007521 |
| TcCLB.506779.120 | hypothetical protein, conserved                        | -0,3505 | 0,0002511  |
| TcCLB.508153.360 | hypothetical protein, conserved                        | -0,3505 | 0,01696    |
| TcCLB.506775.110 | hypothetical protein, conserved                        | -0,3508 | 0,0004987  |
| TcCLB.506919.20  | trans-sialidase (pseudogene), putative                 | -0,3513 | 0,4062     |
| TcCLB.508717.50  | hypothetical protein, conserved                        | -0,3514 | 0,002926   |
| TcCLB.504643.10  | kinesin (pseudogene), putative                         | -0,3515 | 0,0001189  |
| TcCLB.507993.320 | RNA-binding protein 27, putative (RBP27)               | -0,3515 | 0,001755   |
| TcCLB.511079.71  | mucin TcMUC (pseudogene), putative                     | -0,3517 | 0,2166     |
| TcCLB.506951.103 | hypothetical protein                                   | -0,3517 | 0,3865     |
| TcCLB.508805.10  | pre-mRNA splicing factor ATP-dependent RNA helicase (p | -0,3519 | 0,00451    |
| TcCLB.508387.30  | hypothetical protein, conserved                        | -0,3522 | 0,001091   |
| TcCLB.503779.60  | hypothetical protein, conserved                        | -0,3522 | 0,001602   |
| TcCLB.506575.60  | diacylglycerol kinase, putative                        | -0,3522 | 0,001911   |
| TcCLB.509743.40  | trans-sialidase, putative                              | -0,3522 | 0,3652     |
| TcCLB.508441.60  | hypothetical protein, conserved                        | -0,3524 | 0,00135    |
| TcCLB.511491.40  | hypothetical protein, conserved                        | -0,3525 | 0,00001724 |
| TcCLB.506679.90  | RNA editing complex protein MP67, putative             | -0,3526 | 0,0001919  |
| TcCLB.504625.40  | hypothetical protein, conserved                        | -0,3527 | 0,0007511  |
| TcCLB.511919.20  | trans-sialidase, Group V, putative                     | -0,3527 | 0,02865    |
| TcCLB.508525.20  | hypothetical protein, conserved                        | -0,3528 | 0,00001125 |
| TcCLB.506459.100 | surface protease GP63 (pseudogene), putative           | -0,3528 | 0,2854     |
| TcCLB.510075.50  | hypothetical protein, conserved                        | -0,3529 | 0,00006226 |
| TcCLB.505807.240 | hypothetical protein, conserved                        | -0,353  | 0,004628   |
| TcCLB.507049.30  | hypothetical protein, conserved                        | -0,353  | 0,007905   |
| TcCLB.508913.39  | O-sialoglycoprotein endopeptidase, putative            | -0,353  | 0,04184    |
| TcCLB.504187.21  | trans-sialidase (pseudogene), putative                 | -0,353  | 0,07476    |
| TcCLB.509195.40  | mucin TcMUCII, putative                                | -0,3532 | 0,1498     |
| TcCLB.507681.120 | hypothetical protein, conserved (pseudogene)           | -0,3533 | 0,00622    |
| TcCLB.504985.10  | hypothetical protein                                   | -0,3533 | 0,237      |
| TcCLB.509683.60  | hypothetical protein, conserved                        | -0,3537 | 0,002313   |
| TcCLB.507491.110 | hypothetical protein                                   | -0,3539 | 0,000134   |
| TcCLB.506947.30  | hypothetical protein, conserved                        | -0,3539 | 0,0158     |

|                  |                                                        |         |            |
|------------------|--------------------------------------------------------|---------|------------|
| TcCLB.507795.20  | hypothetical protein, conserved                        | -0,3543 | 0,003501   |
| TcCLB.507257.10  | hypothetical protein, conserved                        | -0,3543 | 0,01111    |
| TcCLB.507031.100 | hypothetical protein, conserved                        | -0,3545 | 0,02615    |
| TcCLB.503419.20  | adenosine deaminase-like protein, putative (ADAT1h)    | -0,3546 | 0,001819   |
| TcCLB.509937.80  | hypothetical protein, conserved                        | -0,3546 | 0,002315   |
| TcCLB.467465.10  | surface protease GP63, putative                        | -0,3548 | 0,3954     |
| TcCLB.507017.90  | hypothetical protein, conserved                        | -0,3551 | 0,006729   |
| TcCLB.511417.120 | DNA repair protein BRCA2 (pseudogene), putative        | -0,3554 | 0,0005656  |
| TcCLB.504153.210 | hypothetical protein                                   | -0,3554 | 0,02358    |
| TcCLB.401569.10  | trans-sialidase, putative                              | -0,3554 | 0,133      |
| TcCLB.508795.19  | protein kinase, putative (fragment)                    | -0,3555 | 0,0003226  |
| TcCLB.509561.50  | hypothetical protein, conserved                        | -0,3557 | 0,003484   |
| TcCLB.509573.10  | small GTP-binding protein Rab7, putative               | -0,3557 | 0,00485    |
| TcCLB.504179.20  | hypothetical protein, conserved                        | -0,3557 | 0,009149   |
| TcCLB.506697.70  | hypothetical protein, conserved                        | -0,3559 | 0,0007321  |
| TcCLB.503981.9   | hypothetical protein, conserved (pseudogene)           | -0,3562 | 0,0138     |
| TcCLB.508999.230 | calpain-like cysteine peptidase (pseudogene), putative | -0,3564 | 0,0002369  |
| TcCLB.506867.30  | hypothetical protein, conserved                        | -0,3564 | 0,01942    |
| TcCLB.506297.280 | hypothetical protein, conserved                        | -0,3565 | 0,002231   |
| TcCLB.506931.64  | RNA processing endonuclease 1, putative                | -0,3565 | 0,004513   |
| TcCLB.432067.10  | ATP-dependent RNA helicase, putative                   | -0,3565 | 0,03583    |
| TcCLB.511277.130 | hypothetical protein, conserved                        | -0,3566 | 6,553E-06  |
| TcCLB.427247.10  | serine/threonine protein kinase, putative              | -0,3566 | 0,1881     |
| TcCLB.507041.90  | hypothetical protein                                   | -0,3567 | 0,02337    |
| TcCLB.508119.140 | retrotransposon hot spot (RHS) protein, putative       | -0,3568 | 0,0161     |
| TcCLB.511001.130 | hypothetical protein, conserved                        | -0,357  | 8,029E-07  |
| TcCLB.504883.10  | protein kinase, putative                               | -0,3573 | 0,00003102 |
| TcCLB.508233.25  | hypothetical protein                                   | -0,3573 | 0,007304   |
| TcCLB.510111.30  | hypothetical protein, conserved (pseudogene)           | -0,3573 | 0,009071   |
| TcCLB.507801.100 | hypothetical protein, conserved                        | -0,3574 | 0,0003962  |
| TcCLB.508817.160 | Trichohyalin, putative                                 | -0,3574 | 0,001138   |
| TcCLB.511873.5   | hypothetical protein                                   | -0,3575 | 0,03267    |
| TcCLB.400945.10  | trans-sialidase (pseudogene), putative                 | -0,3576 | 0,2455     |
| TcCLB.506295.60  | hypothetical protein, conserved                        | -0,3578 | 0,03743    |
| TcCLB.506591.10  | hypothetical protein, conserved                        | -0,3578 | 0,07122    |
| TcCLB.506457.90  | hypothetical protein                                   | -0,358  | 0,01467    |
| TcCLB.510429.59  | hypothetical protein, conserved                        | -0,358  | 0,0719     |
| TcCLB.508389.70  | trans-sialidase (pseudogene), putative                 | -0,3581 | 0,155      |
| TcCLB.509979.249 | syntaxin binding protein 1 (pseudogene), putative      | -0,3584 | 0,0178     |
| TcCLB.504431.80  | hypothetical protein                                   | -0,3585 | 0,001343   |
| TcCLB.505999.180 | Non cytoplasmic domain containing protein, conserved   | -0,3586 | 0,002378   |
| TcCLB.510241.30  | hypothetical protein, conserved                        | -0,3588 | 0,003768   |
| TcCLB.510899.10  | surface protease GP63, putative                        | -0,3589 | 0,0009315  |
| TcCLB.508051.10  | hypothetical protein, conserved                        | -0,3589 | 0,001164   |
| TcCLB.508739.90  | hypothetical protein, conserved                        | -0,3589 | 0,05186    |

|                  |                                                          |         |            |
|------------------|----------------------------------------------------------|---------|------------|
| TcCLB.504827.21  | hypothetical protein, conserved (fragment)               | -0,3591 | 0,00008223 |
| TcCLB.507521.60  | hypothetical protein, conserved                          | -0,3593 | 0,02441    |
| TcCLB.503821.5   | hypothetical protein, conserved                          | -0,3593 | 0,07982    |
| TcCLB.503999.110 | hypothetical protein, conserved (fragment)               | -0,3593 | 0,08021    |
| TcCLB.510665.4   | hypothetical protein, conserved (fragment)               | -0,3594 | 0,002119   |
| TcCLB.508217.9   | dynein heavy chain, putative                             | -0,3595 | 0,006953   |
| TcCLB.508723.20  | hypothetical protein, conserved                          | -0,3596 | 0,001501   |
| TcCLB.507099.90  | hypothetical protein, conserved                          | -0,3599 | 0,00003699 |
| TcCLB.510173.110 | hypothetical protein, conserved                          | -0,3599 | 0,001183   |
| TcCLB.506613.141 | hypothetical protein, conserved (pseudogene)             | -0,36   | 0,03803    |
| TcCLB.510821.10  | hypothetical protein, conserved                          | -0,3602 | 0,001085   |
| TcCLB.507825.40  | hypothetical protein, conserved                          | -0,3603 | 0,001514   |
| TcCLB.509979.70  | hypothetical protein, conserved                          | -0,3605 | 0,01772    |
| TcCLB.506309.80  | mucin TcMUCII, putative                                  | -0,3606 | 0,4485     |
| TcCLB.503893.181 | hypothetical protein, conserved (fragment)               | -0,3608 | 0,1769     |
| TcCLB.509259.30  | mucin-associated surface protein (MASP, pseudogene), p   | -0,361  | 0,08724    |
| TcCLB.508543.150 | hypothetical protein, conserved                          | -0,3612 | 0,00007297 |
| TcCLB.507527.30  | DNA replication licensing factor MCM6, putative          | -0,3612 | 0,0006768  |
| TcCLB.511027.29  | hypothetical protein, conserved (pseudogene)             | -0,3612 | 0,006394   |
| TcCLB.504867.90  | glycerol-3-phosphate acyltransferase, putative           | -0,3614 | 0,002259   |
| TcCLB.506625.110 | DNA topoisomerase type IB small subunit, putative        | -0,3614 | 0,004512   |
| TcCLB.506351.90  | surface protease GP63, putative                          | -0,3614 | 0,01318    |
| TcCLB.504557.50  | dispersed gene family protein 1 (DGF-1), putative        | -0,3614 | 0,2134     |
| TcCLB.509569.50  | guanine nucleotide exchange factor subunit GCD7          | -0,3617 | 0,00008953 |
| TcCLB.511283.40  | syntaxin 5, putative                                     | -0,3617 | 0,0007996  |
| TcCLB.511491.50  | KU80 protein, putative                                   | -0,3618 | 0,000589   |
| TcCLB.506543.70  | hypothetical protein, conserved                          | -0,3619 | 0,01784    |
| TcCLB.511283.310 | hypothetical protein, conserved                          | -0,362  | 0,00008066 |
| TcCLB.510031.9   | U5 snrnp-specific protein, putative                      | -0,3621 | 0,001296   |
| TcCLB.508635.10  | hypothetical protein                                     | -0,3622 | 0,08882    |
| TcCLB.508409.90  | hypothetical protein, conserved                          | -0,3624 | 1,822E-06  |
| TcCLB.506183.15  | trans-sialidase (pseudogene), putative                   | -0,3625 | 0,2001     |
| TcCLB.510719.50  | hypothetical protein, conserved                          | -0,3627 | 0,06028    |
| TcCLB.506999.150 | vesicle-associated membrane protein, putative            | -0,3628 | 0,0001004  |
| TcCLB.507089.120 | hypothetical protein, conserved                          | -0,3629 | 0,0368     |
| TcCLB.511629.10  | hypothetical protein, conserved                          | -0,363  | 0,0002219  |
| TcCLB.509647.110 | hypothetical protein, conserved                          | -0,3631 | 0,00006763 |
| TcCLB.506511.60  | flavoprotein monooxygenase, putative                     | -0,3632 | 0,0000167  |
| TcCLB.508277.330 | actin-like protein, putative                             | -0,3633 | 0,0001881  |
| TcCLB.510797.20  | hypothetical protein, conserved                          | -0,3637 | 0,01116    |
| TcCLB.508977.65  | elongation factor 1-gamma (EF-1-gamma, pseudogene),      | -0,3637 | 0,1958     |
| TcCLB.508181.70  | hypothetical protein, conserved                          | -0,3638 | 0,00003234 |
| TcCLB.504105.230 | nuclear cap binding complex subunit CBP110, putative (CB | -0,3642 | 0,0002968  |
| TcCLB.507757.60  | dihydrolipoamide dehydrogenase, putative                 | -0,3642 | 0,004735   |
| TcCLB.503465.30  | Iron-sulfur assembly protein 2, putative (Isa2)          | -0,3642 | 0,05934    |

|                  |                                                        |         |            |
|------------------|--------------------------------------------------------|---------|------------|
| TcCLB.506295.40  | hypothetical protein, conserved                        | -0,3644 | 0,01134    |
| TcCLB.510719.80  | hypothetical protein, conserved                        | -0,3645 | 5,394E-08  |
| TcCLB.511107.20  | hypothetical protein, conserved (pseudogene)           | -0,3646 | 0,001074   |
| TcCLB.508153.20  | vacuolar protein sorting-associated protein, putative  | -0,3647 | 7,079E-06  |
| TcCLB.508783.10  | hypothetical protein, conserved (pseudogene)           | -0,3647 | 0,0004449  |
| TcCLB.506783.10  | hypothetical protein, conserved (pseudogene)           | -0,3647 | 0,1357     |
| TcCLB.509231.50  | hypothetical protein, conserved                        | -0,3648 | 0,006968   |
| TcCLB.508461.130 | elongation factor 1-alpha (ef-1-alpha), putative       | -0,3649 | 7,005E-06  |
| TcCLB.506477.4   | hypothetical protein, conserved                        | -0,3649 | 0,03486    |
| TcCLB.511735.40  | hypothetical protein, conserved                        | -0,3652 | 0,03488    |
| TcCLB.511449.30  | mucin-associated surface protein (MASP), putative      | -0,3652 | 0,136      |
| TcCLB.510823.109 | hypothetical protein, conserved                        | -0,3656 | 0,01228    |
| TcCLB.510603.90  | mitochondrial carrier protein, putative                | -0,3657 | 0,01412    |
| TcCLB.509967.50  | hypothetical protein, conserved                        | -0,3659 | 0,007531   |
| TcCLB.509781.10  | hypothetical protein, conserved                        | -0,366  | 0,008495   |
| TcCLB.504557.40  | hypothetical protein                                   | -0,3663 | 0,2481     |
| TcCLB.508965.70  | hypothetical protein, conserved                        | -0,3663 | 0,3979     |
| TcCLB.506525.45  | hypothetical protein, conserved (pseudogene)           | -0,3667 | 0,06551    |
| TcCLB.504113.30  | hypothetical protein, conserved                        | -0,3668 | 0,01696    |
| TcCLB.503749.10  | hypothetical protein, conserved                        | -0,3671 | 0,000896   |
| TcCLB.511857.40  | N(2), N(2)-dimethylguanosine tRNA methyltransferase, p | -0,3674 | 0,0003666  |
| TcCLB.507639.60  | hypothetical protein, conserved                        | -0,3674 | 0,000449   |
| TcCLB.508637.100 | hypothetical protein, conserved                        | -0,3674 | 0,01179    |
| TcCLB.509665.16  | elongation factor 1-gamma (EF-1-gamma, pseudogene),    | -0,3675 | 0,3528     |
| TcCLB.504159.100 | hypothetical protein, conserved                        | -0,3677 | 0,02475    |
| TcCLB.507105.30  | hypothetical protein, conserved                        | -0,368  | 0,0001603  |
| TcCLB.510305.20  | hypothetical protein, conserved                        | -0,3682 | 0,002711   |
| TcCLB.511139.10  | hypothetical protein, conserved (pseudogene)           | -0,3682 | 0,003809   |
| TcCLB.510719.280 | hypothetical protein, conserved                        | -0,3683 | 0,0006393  |
| TcCLB.435519.10  | DNA replication licensing factor MCM6, putative        | -0,3683 | 0,03915    |
| TcCLB.509109.170 | tubulin tyrosine ligase (pseudogene), putative         | -0,3684 | 0,003261   |
| TcCLB.509665.10  | hypothetical protein                                   | -0,3684 | 0,3758     |
| TcCLB.504131.70  | hypothetical protein, conserved                        | -0,3685 | 8,619E-06  |
| TcCLB.510409.30  | hypothetical protein, conserved                        | -0,3686 | 0,001614   |
| TcCLB.508663.10  | mucin TcMUC (pseudogene), putative                     | -0,3686 | 0,001909   |
| TcCLB.508153.470 | hypothetical protein, conserved                        | -0,3687 | 0,000871   |
| TcCLB.507883.50  | hypothetical protein, conserved                        | -0,3687 | 0,003447   |
| TcCLB.510715.11  | hypothetical protein                                   | -0,3688 | 0,03857    |
| TcCLB.509233.210 | hypothetical protein, conserved                        | -0,3689 | 0,0002295  |
| TcCLB.507669.210 | hypothetical protein, conserved                        | -0,3689 | 0,003297   |
| TcCLB.508633.120 | trans-sialidase (pseudogene), putative                 | -0,369  | 0,05602    |
| TcCLB.504867.99  | hypothetical protein, conserved                        | -0,3691 | 0,0001111  |
| TcCLB.511625.60  | hypothetical protein, conserved                        | -0,3691 | 0,01365    |
| TcCLB.506925.270 | hypothetical protein, conserved                        | -0,3695 | 0,00003735 |
| TcCLB.511849.50  | surface protease GP63 (pseudogene), putative           | -0,3695 | 0,01116    |



|                  |                                                         |         |            |
|------------------|---------------------------------------------------------|---------|------------|
| TcCLB.507491.100 | hypothetical protein, conserved                         | -0,3697 | 0,0003046  |
| TcCLB.506407.20  | hypothetical protein, conserved                         | -0,3697 | 0,01089    |
| TcCLB.503665.40  | surface protease GP63 (pseudogene), putative            | -0,3697 | 0,03997    |
| TcCLB.510289.90  | hypothetical protein, conserved                         | -0,3697 | 0,08601    |
| TcCLB.506567.100 | hypothetical protein, conserved                         | -0,3699 | 0,0002393  |
| TcCLB.510241.70  | heat shock protein, putative                            | -0,3699 | 0,001436   |
| TcCLB.510175.125 | hypothetical protein                                    | -0,37   | 0,05335    |
| TcCLB.508277.20  | protein kinase, putative                                | -0,3701 | 0,0001818  |
| TcCLB.505935.10  | hypothetical protein, conserved (pseudogene)            | -0,3702 | 0,121      |
| TcCLB.410049.10  | hypothetical protein, conserved                         | -0,3703 | 0,3927     |
| TcCLB.509569.90  | ARP2/3 complex subunit, putative                        | -0,3704 | 0,00408    |
| TcCLB.510329.40  | hypothetical protein, conserved                         | -0,3705 | 0,00004874 |
| TcCLB.508355.140 | hypothetical protein, conserved                         | -0,3705 | 0,002382   |
| TcCLB.509051.30  | dTDP-glucose 4,6-dehydratase, putative                  | -0,3708 | 0,001101   |
| TcCLB.511239.120 | hypothetical protein, conserved                         | -0,3708 | 0,05268    |
| TcCLB.511291.70  | hypothetical protein, conserved                         | -0,3709 | 0,000289   |
| TcCLB.510303.90  | hypothetical protein, conserved                         | -0,3709 | 0,002072   |
| TcCLB.507023.240 | hypothetical protein, conserved                         | -0,3709 | 0,002086   |
| TcCLB.504073.10  | endonuclease/exonuclease/phosphatase, putative          | -0,371  | 0,0001013  |
| TcCLB.508799.40  | hypothetical protein, conserved                         | -0,3712 | 0,0000722  |
| TcCLB.510655.159 | hypothetical protein, conserved                         | -0,3712 | 0,04992    |
| TcCLB.511363.10  | hypothetical protein, conserved                         | -0,3713 | 0,00003639 |
| TcCLB.507521.20  | kinesin, putative                                       | -0,3713 | 0,01339    |
| TcCLB.506949.10  | DNA-directed rna polymerase I largest subunit, putative | -0,3713 | 0,07114    |
| TcCLB.510823.20  | conserved protein, unknown function                     | -0,3715 | 0,000218   |
| TcCLB.504827.50  | apurinic/aprimidinic endonuclease, putative             | -0,3715 | 0,007842   |
| TcCLB.508207.50  | hypothetical protein                                    | -0,3717 | 0,01759    |
| TcCLB.509643.139 | Heat shock protein 83, putative                         | -0,3718 | 0,001593   |
| TcCLB.508273.91  | hypothetical protein, conserved                         | -0,3719 | 0,1072     |
| TcCLB.506443.10  | hypothetical protein                                    | -0,372  | 0,001149   |
| TcCLB.508851.40  | Octanoyltransferase, putative                           | -0,372  | 0,06973    |
| TcCLB.511421.224 | hypothetical protein, conserved (pseudogene)            | -0,3721 | 0,0001306  |
| TcCLB.506177.80  | hypothetical protein, conserved                         | -0,3721 | 0,03737    |
| TcCLB.508187.20  | hypothetical protein (pseudogene)                       | -0,3721 | 0,05125    |
| TcCLB.507601.10  | phosphoprotein phosphatase, putative                    | -0,3722 | 3,385E-06  |
| TcCLB.506287.20  | hypothetical protein, conserved                         | -0,3723 | 0,01715    |
| TcCLB.508699.60  | hypothetical protein, conserved                         | -0,3726 | 0,001584   |
| TcCLB.503531.30  | COP9 signalosome complex subunit 5, putative (pseudoge  | -0,3727 | 0,001371   |
| TcCLB.508909.170 | hypothetical protein, conserved                         | -0,3729 | 0,0001317  |
| TcCLB.510745.30  | hypothetical protein, conserved                         | -0,3729 | 0,0675     |
| TcCLB.506133.179 | hypothetical protein                                    | -0,3729 | 0,1591     |
| TcCLB.509967.70  | katanin, putative                                       | -0,3733 | 0,1292     |
| TcCLB.507771.20  | hypothetical protein, conserved                         | -0,3734 | 0,0007342  |
| TcCLB.511311.70  | hypothetical protein, conserved                         | -0,3736 | 0,0002804  |
| TcCLB.504769.100 | trans-sialidase, Group II, putative                     | -0,3736 | 0,03707    |

|                  |                                                          |         |            |
|------------------|----------------------------------------------------------|---------|------------|
| TcCLB.506569.60  | retrotransposon hot spot protein (RHS, pseudogene), puta | -0,3738 | 0,05099    |
| TcCLB.509205.100 | surface protease GP63, putative                          | -0,3739 | 0,02086    |
| TcCLB.506891.20  | wd40 repeat domain-containing protein                    | -0,3742 | 0,002066   |
| TcCLB.506585.50  | hypothetical protein, conserved                          | -0,3743 | 0,0007756  |
| TcCLB.503675.10  | glycosyl transferase-like protein, putative              | -0,3743 | 0,02014    |
| TcCLB.506175.90  | hypothetical protein, conserved                          | -0,3744 | 0,0001973  |
| TcCLB.503695.10  | retrotransposon hot spot protein (RHS, pseudogene), puta | -0,3748 | 0,1438     |
| TcCLB.510889.310 | hypothetical protein, conserved                          | -0,375  | 0,0001738  |
| TcCLB.511211.140 | hypothetical protein, conserved                          | -0,375  | 0,0005108  |
| TcCLB.511301.10  | oxidoreductase-like protein, putative                    | -0,3753 | 0,02952    |
| TcCLB.507089.90  | hypothetical protein, conserved                          | -0,3756 | 0,00007006 |
| TcCLB.511751.14  | hypothetical protein, conserved (fragment)               | -0,3756 | 0,01007    |
| TcCLB.509395.59  | hypothetical protein, conserved                          | -0,3756 | 0,03103    |
| TcCLB.509805.170 | hypothetical protein, conserved                          | -0,3758 | 5,812E-06  |
| TcCLB.510747.170 | hypothetical protein, conserved                          | -0,3762 | 0,02664    |
| TcCLB.510491.10  | hypothetical protein, conserved                          | -0,3763 | 0,04013    |
| TcCLB.503981.50  | hypothetical protein, conserved                          | -0,3765 | 0,003742   |
| TcCLB.509157.40  | hypothetical protein, conserved                          | -0,3765 | 0,006801   |
| TcCLB.511837.40  | hypothetical protein, conserved                          | -0,3765 | 0,01336    |
| TcCLB.508389.160 | trans-sialidase (pseudogene), putative                   | -0,3765 | 0,09159    |
| TcCLB.503671.39  | dynamamin-1-like protein (fragment)                      | -0,3769 | 0,0005367  |
| TcCLB.508355.124 | hypothetical protein, conserved                          | -0,3769 | 0,01333    |
| TcCLB.503391.10  | ATP-dependent DEAD/H DNA helicase recQ, putative         | -0,3769 | 0,2086     |
| TcCLB.509105.100 | Enriched in surface-labeled proteome protein 15 (ESP15)  | -0,3771 | 0,001169   |
| TcCLB.511289.110 | hypothetical protein, conserved                          | -0,3771 | 0,001561   |
| TcCLB.509765.95  | mucin-associated surface protein (MASP, pseudogene), pi  | -0,3771 | 0,02432    |
| TcCLB.508173.70  | hypothetical protein, conserved                          | -0,3772 | 0,00003768 |
| TcCLB.507257.160 | hypothetical protein, conserved                          | -0,3774 | 0,003466   |
| TcCLB.511245.170 | hypothetical protein, conserved                          | -0,3777 | 0,00005438 |
| TcCLB.508329.19  | trans-sialidase (pseudogene), putative                   | -0,3778 | 0,21       |
| TcCLB.509319.70  | hypothetical protein, conserved                          | -0,378  | 0,006484   |
| TcCLB.506007.30  | Protein C21orf2 homolog, putative                        | -0,3781 | 0,001517   |
| TcCLB.511367.350 | hypothetical protein, conserved                          | -0,3782 | 0,0005787  |
| TcCLB.506777.10  | ATP-dependent DEAD/H RNA helicase, putative              | -0,3782 | 0,001546   |
| TcCLB.511365.4   | hypothetical protein, conserved (fragment)               | -0,3782 | 0,03011    |
| TcCLB.511623.10  | hypothetical protein, conserved                          | -0,3789 | 0,00004123 |
| TcCLB.503713.50  | trans-sialidase, putative (fragment)                     | -0,3789 | 0,3478     |
| TcCLB.507063.270 | histone deacetylase, putative                            | -0,3794 | 0,0005263  |
| TcCLB.510289.50  | hypothetical protein, conserved                          | -0,3795 | 0,0005632  |
| TcCLB.510295.20  | MP24, putative                                           | -0,3796 | 0,02351    |
| TcCLB.504769.41  | surface protease GP63 (pseudogene), putative             | -0,3796 | 0,05245    |
| TcCLB.510699.50  | mucin TcMUCII, putative                                  | -0,3797 | 0,03139    |
| TcCLB.504081.9   | trans-sialidase (pseudogene), putative                   | -0,3801 | 0,29       |
| TcCLB.504081.260 | surface protease GP63, putative                          | -0,3803 | 0,3571     |
| TcCLB.507023.90  | hypothetical protein, conserved                          | -0,3804 | 0,0001568  |

|                  |                                                               |         |            |
|------------------|---------------------------------------------------------------|---------|------------|
| TcCLB.511517.170 | hypothetical protein, conserved                               | -0,3804 | 0,0003807  |
| TcCLB.506605.194 | hypothetical protein, conserved                               | -0,3805 | 0,001226   |
| TcCLB.503613.50  | PA domain containing protein, putative (ESP7)                 | -0,3806 | 0,0006325  |
| TcCLB.507007.50  | hypothetical protein, conserved                               | -0,3806 | 0,0007892  |
| TcCLB.511711.70  | hypothetical protein, conserved                               | -0,3806 | 0,002032   |
| TcCLB.503885.30  | hypothetical protein, conserved (pseudogene)                  | -0,3811 | 0,004154   |
| TcCLB.508727.60  | hypothetical protein, conserved                               | -0,3813 | 0,0005653  |
| TcCLB.508277.160 | glutaminyl-tRNA synthetase, putative                          | -0,3815 | 9,296E-08  |
| TcCLB.511909.20  | expression site-associated gene (ESAG-like) protein, putative | -0,3817 | 0,002929   |
| TcCLB.503861.30  | trans-sialidase (pseudogene), putative                        | -0,3817 | 0,007576   |
| TcCLB.507049.80  | hypothetical protein, conserved                               | -0,3819 | 0,005971   |
| TcCLB.508717.40  | branch point binding protein, putative                        | -0,382  | 0,001209   |
| TcCLB.509443.30  | AUT2/APG4/ATG4 cysteine peptidase, putative                   | -0,382  | 0,007949   |
| TcCLB.506989.260 | hypothetical protein, conserved (pseudogene)                  | -0,3821 | 0,005238   |
| TcCLB.508277.250 | hypothetical protein, conserved                               | -0,3822 | 0,00002708 |
| TcCLB.508725.10  | CCR4-NOT transcription complex subunit 10, putative           | -0,3822 | 0,00007297 |
| TcCLB.510799.80  | hypothetical protein, conserved                               | -0,3822 | 0,0002269  |
| TcCLB.508693.100 | surface protease GP63, putative                               | -0,3824 | 0,002239   |
| TcCLB.503777.19  | phosphoribosylpyrophosphate synthetase, putative              | -0,3824 | 0,003081   |
| TcCLB.503925.70  | hypothetical protein, conserved                               | -0,3825 | 6,044E-07  |
| TcCLB.509897.132 | hypothetical protein, conserved (pseudogene)                  | -0,3826 | 0,00003526 |
| TcCLB.509157.120 | hypothetical protein, conserved                               | -0,3827 | 0,02726    |
| TcCLB.504427.260 | kinesin, putative                                             | -0,383  | 2,705E-06  |
| TcCLB.506587.40  | ATP-dependent RNA helicase FAL1, putative                     | -0,3832 | 0,00003982 |
| TcCLB.505229.20  | conserved protein, unknown function                           | -0,3833 | 6,071E-06  |
| TcCLB.506251.30  | hypothetical protein, conserved                               | -0,3833 | 0,00001584 |
| TcCLB.405737.4   | RNA polymerase-associated protein CDC73, putative (fragment)  | -0,3833 | 0,2998     |
| TcCLB.509901.90  | hypothetical protein, conserved (pseudogene)                  | -0,3834 | 0,0000137  |
| TcCLB.510101.490 | anion-transporting ATPase-like, putative                      | -0,3834 | 0,0000229  |
| TcCLB.511189.50  | hypothetical protein, conserved (pseudogene)                  | -0,3835 | 0,0003516  |
| TcCLB.507091.40  | dihydroorotate dehydrogenase, putative (DHODH)                | -0,3835 | 0,01406    |
| TcCLB.508211.19  | hypothetical protein, conserved                               | -0,3836 | 0,01705    |
| TcCLB.509073.119 | proteasome regulatory non-ATP-ase subunit 7, putative         | -0,3838 | 0,001005   |
| TcCLB.507597.10  | hypothetical protein                                          | -0,3838 | 0,1382     |
| TcCLB.510217.70  | trans-sialidase (pseudogene), putative                        | -0,3839 | 0,2433     |
| TcCLB.463359.9   | vacuolar assembly protein vps41, putative                     | -0,3843 | 0,008557   |
| TcCLB.506813.170 | hypothetical protein, conserved (pseudogene)                  | -0,3845 | 0,05595    |
| TcCLB.504741.149 | hypothetical protein                                          | -0,3845 | 0,1397     |
| TcCLB.402857.20  | hypothetical protein                                          | -0,3847 | 8,853E-07  |
| TcCLB.510173.120 | hypothetical protein, conserved                               | -0,3848 | 0,01524    |
| TcCLB.508355.340 | hypothetical protein, conserved                               | -0,3851 | 0,00705    |
| TcCLB.506553.40  | ATP-dependent RNA helicase (pseudogene), putative             | -0,3852 | 0,0007551  |
| TcCLB.511203.5   | hypothetical protein, conserved                               | -0,3853 | 0,1357     |
| TcCLB.509719.50  | protein kinase, putative                                      | -0,3854 | 0,0007771  |
| TcCLB.506979.5   | hypothetical protein, conserved (pseudogene)                  | -0,3854 | 0,1129     |

|                  |                                                        |         |            |
|------------------|--------------------------------------------------------|---------|------------|
| TcCLB.505843.30  | DNA repair protein Rad9, putative (Rad9)               | -0,3855 | 0,0000716  |
| TcCLB.507105.80  | dispersed gene family protein 1 (DGF-1), putative      | -0,3856 | 0,168      |
| TcCLB.511463.4   | actin, putative                                        | -0,3858 | 0,07313    |
| TcCLB.508647.160 | hypothetical protein, conserved                        | -0,3859 | 0,00003879 |
| TcCLB.510289.30  | phosphatidylinositol-4-phosphate 5-kinase, putative    | -0,3862 | 0,002715   |
| TcCLB.511801.30  | hypothetical protein, conserved                        | -0,3863 | 0,0006687  |
| TcCLB.510953.10  | surface protease GP63 (pseudogene), putative           | -0,3864 | 0,132      |
| TcCLB.510303.250 | hypothetical protein, conserved                        | -0,3866 | 3,617E-06  |
| TcCLB.506579.70  | hypothetical protein, conserved                        | -0,3868 | 7,195E-08  |
| TcCLB.510889.4   | hypothetical protein, conserved                        | -0,3868 | 0,1566     |
| TcCLB.505183.100 | hypothetical protein, conserved                        | -0,387  | 0,001214   |
| TcCLB.510493.4   | hypothetical protein, conserved (fragment)             | -0,387  | 0,09213    |
| TcCLB.509591.50  | RNA-binding protein 34, putative (RBP34)               | -0,3871 | 0,0006201  |
| TcCLB.503897.140 | hypothetical protein, conserved                        | -0,3872 | 0,001136   |
| TcCLB.507949.130 | glycerol-3-phosphate dehydrogenase (FAD-dependent), pu | -0,3877 | 0,007799   |
| TcCLB.506579.110 | hypothetical protein, conserved                        | -0,3881 | 4,599E-08  |
| TcCLB.511249.80  | hypothetical protein, conserved                        | -0,3882 | 0,00002161 |
| TcCLB.506147.200 | hypothetical protein, conserved                        | -0,3883 | 0,0002104  |
| TcCLB.509127.30  | hypothetical protein, conserved                        | -0,3883 | 0,03035    |
| TcCLB.506855.200 | hypothetical protein                                   | -0,3884 | 0,06389    |
| TcCLB.511621.80  | hypothetical protein                                   | -0,3886 | 0,03555    |
| TcCLB.511239.60  | hypothetical protein, conserved                        | -0,3887 | 4,075E-06  |
| TcCLB.508711.20  | hypothetical protein, conserved                        | -0,3887 | 0,00003358 |
| TcCLB.506733.140 | hypothetical protein, conserved                        | -0,3888 | 0,0003358  |
| TcCLB.507163.90  | hypothetical protein, conserved                        | -0,3888 | 0,04416    |
| TcCLB.506207.30  | hypothetical protein, conserved                        | -0,389  | 0,003813   |
| TcCLB.505999.70  | hypothetical protein, conserved                        | -0,3891 | 0,0007197  |
| TcCLB.508929.20  | UDP-Gal or UDP-GlcNAc-dependent glycosyltransferase, p | -0,3891 | 0,03111    |
| TcCLB.511903.200 | hypothetical protein, conserved                        | -0,3893 | 0,0006498  |
| TcCLB.511075.40  | cullin, putative                                       | -0,3896 | 0,00003555 |
| TcCLB.504737.10  | trans-sialidase (pseudogene), putative                 | -0,3896 | 0,1786     |
| TcCLB.508539.60  | mucin-associated surface protein (MASP), putative      | -0,3897 | 0,139      |
| TcCLB.510769.110 | hypothetical protein, conserved                        | -0,3898 | 0,003076   |
| TcCLB.509205.90  | surface protease GP63 (pseudogene), putative           | -0,3899 | 0,01789    |
| TcCLB.507511.40  | G5-interacting protein, putative (G5-IP)               | -0,3901 | 0,00004359 |
| TcCLB.511867.70  | hypothetical protein                                   | -0,3901 | 0,0007487  |
| TcCLB.506113.55  | N-acetyltransferase complex ARD1 subunit (pseudogene), | -0,3902 | 0,1096     |
| TcCLB.511741.10  | hypothetical protein, conserved                        | -0,3906 | 0,009741   |
| TcCLB.505555.50  | hypothetical protein                                   | -0,3914 | 2,141E-07  |
| TcCLB.506833.70  | cationic amino acid transporter, putative              | -0,3914 | 0,0003845  |
| TcCLB.506265.80  | hypothetical protein, conserved                        | -0,3914 | 0,01191    |
| TcCLB.506175.30  | hypothetical protein, conserved                        | -0,3917 | 0,03096    |
| TcCLB.505071.30  | serine/threonine protein kinase, putative              | -0,3919 | 0,0001278  |
| TcCLB.506435.300 | ubiquitin-protein ligase, putative                     | -0,3921 | 0,003682   |
| TcCLB.510329.160 | hypothetical protein, conserved                        | -0,3924 | 3,051E-06  |

|                  |                                                            |         |            |
|------------------|------------------------------------------------------------|---------|------------|
| TcCLB.511391.80  | hypothetical protein                                       | -0,3928 | 0,1071     |
| TcCLB.508173.219 | hypothetical protein, conserved                            | -0,393  | 1,214E-06  |
| TcCLB.509217.30  | retrotransposon hot spot protein (RHS, pseudogene), puta   | -0,393  | 0,05644    |
| TcCLB.476733.29  | serine-threonine dehydratase, putative                     | -0,393  | 0,09954    |
| TcCLB.511039.20  | hypothetical protein, conserved                            | -0,3932 | 0,0005482  |
| TcCLB.511277.100 | hypothetical protein, conserved                            | -0,3932 | 0,004836   |
| TcCLB.510575.50  | hypothetical protein, conserved                            | -0,3934 | 0,04674    |
| TcCLB.511539.18  | hypothetical protein, conserved                            | -0,3935 | 0,00104    |
| TcCLB.511469.30  | coatomer subunit zeta, putative                            | -0,3941 | 0,004852   |
| TcCLB.506375.70  | hypothetical protein, conserved                            | -0,3941 | 0,008588   |
| TcCLB.422041.9   | pre-mRNA splicing factor ATP-dependent RNA helicase, p     | -0,3941 | 0,01104    |
| TcCLB.511277.310 | hypothetical protein, conserved                            | -0,3944 | 0,00002689 |
| TcCLB.506941.260 | hypothetical protein, conserved                            | -0,3944 | 0,0004957  |
| TcCLB.510879.190 | hypothetical protein, conserved                            | -0,3944 | 0,002277   |
| TcCLB.509319.109 | paraflagellar rod protein, putative (fragment)             | -0,3944 | 0,05497    |
| TcCLB.506957.80  | hypothetical protein, conserved                            | -0,3946 | 4,271E-06  |
| TcCLB.508231.220 | hypothetical protein, conserved                            | -0,3946 | 0,04819    |
| TcCLB.506151.20  | hypothetical protein, conserved                            | -0,3948 | 1,887E-07  |
| TcCLB.503635.50  | hypothetical protein, conserved                            | -0,3949 | 0,0006727  |
| TcCLB.508177.100 | ubiquitin activating enzyme, putative                      | -0,3949 | 0,003667   |
| TcCLB.507445.30  | trans-sialidase (pseudogene), putative                     | -0,3949 | 0,01457    |
| TcCLB.405165.19  | hypothetical protein, conserved (fragment)                 | -0,3951 | 0,0005653  |
| TcCLB.508727.9   | CCR4-NOT transcription complex subunit 10, putative        | -0,3952 | 0,00002481 |
| TcCLB.509965.350 | ubiquitin-protein ligase, putative                         | -0,3955 | 5,854E-07  |
| TcCLB.504411.10  | hypothetical protein, conserved                            | -0,3955 | 0,0004095  |
| TcCLB.508571.10  | hypothetical protein                                       | -0,3955 | 0,007447   |
| TcCLB.510307.230 | trans-sialidase, Group II, putative                        | -0,3955 | 0,08399    |
| TcCLB.511127.100 | catalytic subunit of the vacuolar transporter chaperone 4, | -0,3956 | 1,416E-06  |
| TcCLB.504109.100 | hypothetical protein, conserved                            | -0,3956 | 9,515E-06  |
| TcCLB.511277.620 | hypothetical protein, conserved                            | -0,3956 | 0,0000856  |
| TcCLB.509607.20  | hypothetical protein, conserved                            | -0,3958 | 0,2813     |
| TcCLB.506855.10  | palmitoyl acyltransferase 3, putative                      | -0,3959 | 0,00122    |
| TcCLB.510799.18  | hypothetical protein, conserved                            | -0,3959 | 0,001752   |
| TcCLB.509085.40  | retrotransposon hot spot protein (RHS, pseudogene), puta   | -0,396  | 0,1656     |
| TcCLB.511245.230 | hypothetical protein, conserved                            | -0,3961 | 0,0004801  |
| TcCLB.510389.10  | hypothetical protein, conserved (pseudogene)               | -0,3961 | 0,03169    |
| TcCLB.506247.60  | hypothetical protein, conserved                            | -0,3965 | 0,00003034 |
| TcCLB.507257.50  | hypothetical protein, conserved                            | -0,3966 | 1,199E-07  |
| TcCLB.510387.60  | trans-sialidase (pseudogene), putative                     | -0,3966 | 0,03149    |
| TcCLB.506495.10  | hypothetical protein, conserved                            | -0,3968 | 0,007286   |
| TcCLB.507165.40  | hypothetical protein, conserved                            | -0,3969 | 0,009102   |
| TcCLB.509369.50  | surface protease GP63, putative                            | -0,3974 | 0,2722     |
| TcCLB.506195.309 | hypothetical protein, conserved                            | -0,3976 | 0,0002714  |
| TcCLB.509877.30  | guanine nucleotide-binding beta subunit-like protein       | -0,3977 | 0,00001342 |
| TcCLB.503885.10  | hypothetical protein, conserved                            | -0,3977 | 0,001676   |

|                  |                                                           |         |            |
|------------------|-----------------------------------------------------------|---------|------------|
| TcCLB.510241.20  | hypothetical protein, conserved                           | -0,3979 | 0,00004349 |
| TcCLB.511511.90  | ATP-dependent DEAD/H DNA helicase recQ family, putati     | -0,398  | 0,0001415  |
| TcCLB.469785.40  | RNA-binding protein, putative                             | -0,398  | 0,01318    |
| TcCLB.511757.20  | hypothetical protein, conserved                           | -0,3981 | 0,01024    |
| TcCLB.509429.230 | hypothetical protein, conserved                           | -0,3983 | 0,004123   |
| TcCLB.510621.49  | mucin-associated surface protein (MASP), putative         | -0,3983 | 0,2094     |
| TcCLB.507099.10  | hypothetical protein, conserved                           | -0,3987 | 5,039E-06  |
| TcCLB.508817.170 | hypothetical protein, conserved                           | -0,3987 | 0,009071   |
| TcCLB.506493.90  | cysteine peptidase, Clan CA, family C2, putative          | -0,3989 | 6,205E-06  |
| TcCLB.508555.70  | calpain-like cysteine peptidase, putative                 | -0,399  | 0,003738   |
| TcCLB.503953.10  | hypothetical protein, conserved                           | -0,3993 | 6,422E-06  |
| TcCLB.511001.140 | hypothetical protein, conserved                           | -0,3993 | 0,0001889  |
| TcCLB.509125.10  | mannosyltransferase-like protein, putative                | -0,3996 | 0,00006262 |
| TcCLB.506135.90  | hypothetical protein, conserved                           | -0,3996 | 0,0007388  |
| TcCLB.508857.150 | hypothetical protein, conserved                           | -0,3996 | 0,001403   |
| TcCLB.504229.30  | protein kinase, putative                                  | -0,3999 | 0,0000633  |
| TcCLB.508307.190 | hypothetical protein, conserved                           | -0,4    | 0,00428    |
| TcCLB.507611.340 | hypothetical protein, conserved                           | -0,4002 | 0,00007434 |
| TcCLB.508943.40  | hypothetical protein, conserved                           | -0,4002 | 0,0167     |
| TcCLB.506207.20  | hypothetical protein, conserved                           | -0,4003 | 7,502E-07  |
| TcCLB.506173.219 | trans-sialidase (pseudogene), putative                    | -0,4003 | 0,1843     |
| TcCLB.509665.40  | hypothetical protein                                      | -0,4003 | 0,2871     |
| TcCLB.508927.30  | hypothetical protein, conserved                           | -0,4004 | 0,00141    |
| TcCLB.511755.40  | hypothetical protein, conserved                           | -0,4004 | 0,002077   |
| TcCLB.506755.74  | mitochondrial carrier protein, putative                   | -0,4005 | 0,002094   |
| TcCLB.511429.10  | transmembrane protein, conserved (fragment)               | -0,4007 | 3,521E-06  |
| TcCLB.508727.44  | hypothetical protein, conserved                           | -0,4009 | 0,00002655 |
| TcCLB.503579.80  | hypothetical protein, conserved                           | -0,4009 | 0,00004573 |
| TcCLB.509157.240 | hypothetical protein, conserved                           | -0,4015 | 0,009688   |
| TcCLB.510243.128 | hypothetical protein, conserved                           | -0,4015 | 0,03112    |
| TcCLB.506401.220 | electron transfer flavoprotein-ubiquinone oxidoreductase, | -0,4016 | 0,0003167  |
| TcCLB.511213.81  | retrotransposon hot spot protein (RHS, pseudogene), puta  | -0,4016 | 0,02163    |
| TcCLB.510239.30  | hypothetical protein, conserved (pseudogene)              | -0,4019 | 0,1        |
| TcCLB.506947.70  | hypothetical protein, conserved                           | -0,402  | 0,01712    |
| TcCLB.510933.160 | mucin-associated surface protein (MASP, pseudogene), pu   | -0,4022 | 0,0889     |
| TcCLB.511737.40  | hypothetical protein, conserved                           | -0,4023 | 0,0002912  |
| TcCLB.508463.10  | hypothetical protein, conserved                           | -0,4023 | 0,03429    |
| TcCLB.511737.3   | superoxide dismutase, putative                            | -0,4024 | 0,02331    |
| TcCLB.503809.30  | RNA-binding protein, putative                             | -0,4026 | 0,003266   |
| TcCLB.511757.10  | hypothetical protein, conserved                           | -0,4028 | 0,00001169 |
| TcCLB.511301.180 | trans-sialidase (pseudogene), putative                    | -0,4028 | 0,0004953  |
| TcCLB.510879.40  | Carboxypeptidase Nna1-like protein, putative              | -0,4031 | 7,642E-06  |
| TcCLB.509611.130 | hypothetical protein, conserved                           | -0,4031 | 0,01666    |
| TcCLB.509657.11  | hypothetical protein, conserved (pseudogene)              | -0,4032 | 0,06494    |
| TcCLB.507641.220 | hypothetical protein                                      | -0,4034 | 0,0003458  |

|                  |                                                          |         |            |
|------------------|----------------------------------------------------------|---------|------------|
| TcCLB.503653.104 | hypothetical protein, conserved                          | -0,4037 | 0,2217     |
| TcCLB.511261.100 | chaperone DNAJ protein, putative                         | -0,4038 | 0,0001337  |
| TcCLB.506425.60  | hypothetical protein, conserved                          | -0,4038 | 0,0004602  |
| TcCLB.506717.4   | hypothetical protein, conserved (fragment)               | -0,4039 | 0,08794    |
| TcCLB.510535.60  | CCR4 associated factor, putative                         | -0,4042 | 0,00002622 |
| TcCLB.510877.100 | hypothetical protein, conserved                          | -0,4044 | 0,0001114  |
| TcCLB.508461.344 | hypothetical protein, conserved                          | -0,4045 | 0,0054     |
| TcCLB.506819.10  | hypothetical protein, conserved                          | -0,4045 | 0,02592    |
| TcCLB.506369.40  | hypothetical protein, conserved                          | -0,4046 | 6,286E-06  |
| TcCLB.509627.20  | hypothetical protein, conserved                          | -0,4048 | 0,0001198  |
| TcCLB.504137.40  | hypothetical protein, conserved                          | -0,4048 | 0,0002572  |
| TcCLB.506247.80  | DNA-binding protein, putative                            | -0,4048 | 0,0003     |
| TcCLB.504639.50  | retrotransposon hot spot protein (RHS, pseudogene), puta | -0,4048 | 0,000562   |
| TcCLB.510329.50  | hypothetical protein                                     | -0,4049 | 1,446E-06  |
| TcCLB.503559.100 | long-chain-fatty-acid-CoA ligase, putative               | -0,4049 | 0,00005162 |
| TcCLB.508761.130 | hypothetical protein                                     | -0,4049 | 0,4486     |
| TcCLB.507257.100 | hypothetical protein, conserved                          | -0,405  | 0,0004454  |
| TcCLB.507611.290 | acetyltransferase, putative                              | -0,4051 | 0,003292   |
| TcCLB.510611.40  | hypothetical protein, conserved                          | -0,4052 | 0,0001124  |
| TcCLB.504431.10  | hypothetical protein, conserved                          | -0,4052 | 0,0001165  |
| TcCLB.503781.40  | hypothetical protein, conserved                          | -0,4053 | 0,006863   |
| TcCLB.508403.10  | hypothetical protein, conserved                          | -0,4055 | 0,00009483 |
| TcCLB.503651.4   | hypothetical protein, conserved (fragment)               | -0,4057 | 0,0003167  |
| TcCLB.509957.30  | retrotransposon hot spot protein (RHS, pseudogene), puta | -0,4057 | 0,02893    |
| TcCLB.503489.30  | hypothetical protein, conserved                          | -0,4058 | 0,001632   |
| TcCLB.508737.40  | hypothetical protein                                     | -0,4067 | 0,000487   |
| TcCLB.511041.30  | hypothetical protein, conserved                          | -0,4069 | 5,704E-07  |
| TcCLB.509253.40  | hypothetical protein, conserved                          | -0,4071 | 0,001264   |
| TcCLB.508535.40  | hypothetical protein, conserved                          | -0,4074 | 0,03182    |
| TcCLB.509875.230 | hypothetical protein, conserved                          | -0,4076 | 0,0005866  |
| TcCLB.511509.50  | hypothetical protein, conserved                          | -0,4077 | 0,00001306 |
| TcCLB.510971.60  | protein kinase, putative                                 | -0,4077 | 0,0003991  |
| TcCLB.507035.120 | hypothetical protein, conserved                          | -0,4077 | 0,001658   |
| TcCLB.507811.30  | ATP-dependent DEAD/H RNA helicase, putative              | -0,4078 | 0,00007533 |
| TcCLB.509203.20  | cyclin dependent kinase-binding protein, putative        | -0,4079 | 0,00002875 |
| TcCLB.504689.10  | hypothetical protein                                     | -0,4083 | 0,2017     |
| TcCLB.503817.10  | trans-sialidase (pseudogene), putative                   | -0,4084 | 0,1377     |
| TcCLB.509051.60  | ubiquitin-protein ligase, putative (fragment)            | -0,4085 | 0,0525     |
| TcCLB.509715.130 | hypothetical protein, conserved                          | -0,4086 | 0,000775   |
| TcCLB.504131.150 | SNF2 family protein                                      | -0,4086 | 0,002402   |
| TcCLB.430727.9   | inositol phosphatidylinositol phosphatase, putative      | -0,4088 | 0,005274   |
| TcCLB.510043.20  | hypothetical protein, conserved (pseudogene)             | -0,4091 | 2,218E-07  |
| TcCLB.503453.50  | hypothetical protein, conserved                          | -0,4091 | 0,001154   |
| TcCLB.504109.120 | hypothetical protein, conserved                          | -0,4092 | 0,0007536  |
| TcCLB.510429.40  | Present in the outer mitochondrial membrane proteome     | -0,4092 | 0,001047   |

|                  |                                                                |         |            |
|------------------|----------------------------------------------------------------|---------|------------|
| TcCLB.511873.30  | trans-sialidase (pseudogene), putative                         | -0,4092 | 0,005984   |
| TcCLB.506835.150 | zinc-binding protein (Yippee), putative                        | -0,4092 | 0,007163   |
| TcCLB.508157.10  | serine-alanine-and proline-rich protein (pseudogene), putative | -0,4092 | 0,09215    |
| TcCLB.506725.80  | hypothetical protein, conserved                                | -0,4093 | 0,0001207  |
| TcCLB.505965.92  | hypothetical protein, conserved (pseudogene)                   | -0,4094 | 0,01766    |
| TcCLB.507021.90  | hypothetical protein, conserved                                | -0,4095 | 0,0002497  |
| TcCLB.508163.90  | trans-sialidase (pseudogene), putative                         | -0,4095 | 0,1478     |
| TcCLB.507793.20  | cysteine synthase, putative                                    | -0,4099 | 0,0004198  |
| TcCLB.506465.10  | hypothetical protein, conserved                                | -0,4104 | 0,0001454  |
| TcCLB.508323.110 | hypothetical protein, conserved                                | -0,4105 | 0,00235    |
| TcCLB.507035.70  | hypothetical protein                                           | -0,4106 | 0,01795    |
| TcCLB.511183.315 | hypothetical protein, conserved (pseudogene)                   | -0,4106 | 0,2636     |
| TcCLB.507627.9   | kinesin, putative                                              | -0,4109 | 4,041E-06  |
| TcCLB.509741.30  | hypothetical protein, conserved                                | -0,4109 | 0,0002204  |
| TcCLB.511109.80  | hypothetical protein, conserved                                | -0,4109 | 0,005827   |
| TcCLB.508257.190 | hypothetical protein, conserved                                | -0,4112 | 0,002372   |
| TcCLB.510515.50  | hypothetical protein, conserved                                | -0,4113 | 0,002337   |
| TcCLB.508375.70  | hypothetical protein, conserved                                | -0,4114 | 0,002588   |
| TcCLB.507815.20  | trans-sialidase (pseudogene), putative                         | -0,4114 | 0,01591    |
| TcCLB.506737.151 | surface protease GP63 (pseudogene), putative                   | -0,4115 | 0,0006684  |
| TcCLB.509007.80  | hypothetical protein, conserved                                | -0,4117 | 0,0003041  |
| TcCLB.503939.120 | hypothetical protein, conserved                                | -0,4122 | 0,00001982 |
| TcCLB.510599.30  | hypothetical protein, conserved                                | -0,4123 | 2,359E-06  |
| TcCLB.507031.70  | hypothetical protein, conserved                                | -0,4124 | 0,0006724  |
| TcCLB.506679.120 | hypothetical protein                                           | -0,4124 | 0,002321   |
| TcCLB.511559.30  | ras-related GTP-binding protein, putative                      | -0,4126 | 0,0008165  |
| TcCLB.506445.40  | ubiquitin hydrolase (pseudogene), putative                     | -0,4127 | 9,539E-06  |
| TcCLB.511277.380 | hypothetical protein, conserved                                | -0,4127 | 0,03793    |
| TcCLB.506303.120 | hypothetical protein, conserved                                | -0,4128 | 0,00001118 |
| TcCLB.506213.90  | hypothetical protein, conserved                                | -0,4129 | 0,00008586 |
| TcCLB.509171.60  | hypothetical protein, conserved                                | -0,4131 | 0,0002033  |
| TcCLB.507517.30  | hypothetical protein, conserved                                | -0,4131 | 0,002356   |
| TcCLB.507737.20  | hypothetical protein, conserved                                | -0,4131 | 0,002501   |
| TcCLB.507669.170 | WD40/YVTN repeat-like-containing protein                       | -0,4133 | 5,797E-07  |
| TcCLB.506661.150 | hypothetical protein, conserved                                | -0,4137 | 0,008055   |
| TcCLB.506813.10  | hypothetical protein                                           | -0,4139 | 0,01207    |
| TcCLB.508707.110 | hypothetical protein, conserved                                | -0,4139 | 0,01228    |
| TcCLB.507821.40  | trans-sialidase (pseudogene), putative                         | -0,414  | 0,0102     |
| TcCLB.508255.10  | trans-sialidase (pseudogene), putative                         | -0,4142 | 0,01317    |
| TcCLB.506205.10  | hypothetical protein, conserved                                | -0,4146 | 0,00002846 |
| TcCLB.510437.60  | hypothetical protein, conserved                                | -0,4149 | 0,003966   |
| TcCLB.509901.170 | apurinic/aprimidinic endonuclease (TCAP)                       | -0,4151 | 0,00006913 |
| TcCLB.506315.60  | hypothetical protein, conserved                                | -0,4153 | 0,0006515  |
| TcCLB.508409.338 | DNA repair protein, putative                                   | -0,4154 | 0,001218   |
| TcCLB.509669.10  | hypothetical protein, conserved                                | -0,4156 | 0,01641    |



|                  |                                                       |         |            |
|------------------|-------------------------------------------------------|---------|------------|
| TcCLB.503779.70  | hypothetical protein, conserved                       | -0,4157 | 0,02385    |
| TcCLB.510609.60  | hypothetical protein, conserved                       | -0,4158 | 1,017E-06  |
| TcCLB.503697.20  | hypothetical protein, conserved                       | -0,4159 | 0,00007422 |
| TcCLB.511747.20  | hypothetical protein, conserved                       | -0,4159 | 0,00034    |
| TcCLB.508813.30  | surface protease GP63 (pseudogene), putative          | -0,4159 | 0,083      |
| TcCLB.508741.180 | hypothetical protein, conserved                       | -0,416  | 0,0005906  |
| TcCLB.510531.20  | hypothetical protein, conserved                       | -0,416  | 0,001693   |
| TcCLB.511921.167 | hypothetical protein, conserved (pseudogene)          | -0,4161 | 0,2022     |
| TcCLB.511065.50  | phosphatidylinositol 3-kinase, putative               | -0,4162 | 0,004215   |
| TcCLB.467795.9   | diphthamide synthesis protein, putative               | -0,4165 | 0,00009042 |
| TcCLB.506009.80  | DNA repair and transcription factor protein, putative | -0,4166 | 0,0006247  |
| TcCLB.511367.310 | hypothetical protein, conserved                       | -0,4167 | 0,001028   |
| TcCLB.508593.30  | hypothetical protein, conserved                       | -0,4168 | 0,0001111  |
| TcCLB.508647.130 | hypothetical protein, conserved                       | -0,4168 | 0,0002174  |
| TcCLB.508047.80  | mucin TcMUCII (pseudogene), putative                  | -0,4173 | 0,1739     |
| TcCLB.510243.54  | hypothetical protein, conserved                       | -0,4174 | 0,0002486  |
| TcCLB.503679.40  | actin-related protein 2, putative                     | -0,4177 | 0,08578    |
| TcCLB.508723.90  | hypothetical protein, conserved                       | -0,4178 | 0,0001985  |
| TcCLB.509287.170 | trans-sialidase (pseudogene), putative                | -0,4178 | 0,001411   |
| TcCLB.511183.391 | surface protease GP63 (pseudogene), putative          | -0,4179 | 0,0668     |
| TcCLB.509461.50  | hypothetical protein, conserved                       | -0,418  | 0,0001105  |
| TcCLB.511287.34  | hypothetical protein, conserved                       | -0,418  | 0,0002764  |
| TcCLB.507821.20  | hypothetical protein                                  | -0,4181 | 0,134      |
| TcCLB.504159.60  | hypothetical protein, conserved                       | -0,4182 | 0,0003067  |
| TcCLB.508325.25  | trans-sialidase (pseudogene), putative                | -0,4185 | 0,01274    |
| TcCLB.507991.90  | hypothetical protein                                  | -0,4187 | 0,00006994 |
| TcCLB.511365.50  | hypothetical protein, conserved (pseudogene)          | -0,4187 | 0,0001846  |
| TcCLB.510351.60  | hypothetical protein, conserved                       | -0,4188 | 0,003266   |
| TcCLB.510823.60  | hypothetical protein, conserved                       | -0,4189 | 0,00000624 |
| TcCLB.506925.150 | protein phosphatase, putative                         | -0,419  | 0,00025    |
| TcCLB.506835.131 | hypothetical protein, conserved                       | -0,4193 | 0,02718    |
| TcCLB.509793.20  | hypothetical protein, conserved                       | -0,4194 | 0,0007679  |
| TcCLB.507583.60  | hypothetical protein, conserved                       | -0,4196 | 0,2398     |
| TcCLB.507837.90  | cell division cycle protein, putative                 | -0,4198 | 0,001147   |
| TcCLB.509937.160 | hypothetical protein, conserved                       | -0,4199 | 9,372E-06  |
| TcCLB.511643.80  | hypothetical protein, conserved (pseudogene)          | -0,4201 | 0,00000996 |
| TcCLB.508737.110 | hypothetical protein, conserved                       | -0,4201 | 0,00004953 |
| TcCLB.509899.10  | trans-sialidase (pseudogene), putative                | -0,4202 | 0,001466   |
| TcCLB.511569.30  | trans-sialidase (pseudogene), putative                | -0,4206 | 0,02799    |
| TcCLB.507251.30  | hypothetical protein, conserved                       | -0,4207 | 0,00006716 |
| TcCLB.504137.70  | hypothetical protein, conserved                       | -0,4207 | 0,0004606  |
| TcCLB.507009.90  | iron-sulfur cluster assembly protein, putative        | -0,4209 | 0,0003247  |
| TcCLB.506737.20  | protein kinase, putative                              | -0,421  | 0,00004264 |
| TcCLB.506895.20  | hypothetical protein, conserved                       | -0,4212 | 5,289E-06  |
| TcCLB.511287.100 | hypothetical protein, conserved                       | -0,4212 | 0,0000622  |

|                  |                                                           |         |            |
|------------------|-----------------------------------------------------------|---------|------------|
| TcCLB.509671.90  | COP-coated vesicle membrane protein gp25L precursor, p    | -0,4212 | 0,0001054  |
| TcCLB.511627.110 | heat shock protein DNAJ, putative                         | -0,4213 | 2,216E-11  |
| TcCLB.507807.20  | hypothetical protein, conserved                           | -0,4213 | 0,01027    |
| TcCLB.511821.80  | hypothetical protein, conserved                           | -0,4214 | 0,0001313  |
| TcCLB.504881.10  | hypothetical protein, conserved                           | -0,4216 | 0,0000803  |
| TcCLB.508389.174 | hypothetical protein, conserved (pseudogene)              | -0,4218 | 0,04173    |
| TcCLB.508607.70  | trans-sialidase (pseudogene), putative                    | -0,4221 | 0,001744   |
| TcCLB.509791.70  | hypothetical protein, conserved                           | -0,4222 | 0,003326   |
| TcCLB.507771.120 | trans-sialidase (pseudogene), putative                    | -0,4222 | 0,008825   |
| TcCLB.509617.50  | hypothetical protein, conserved                           | -0,4223 | 0,00006528 |
| TcCLB.507601.130 | hypothetical protein, conserved                           | -0,4226 | 3,154E-06  |
| TcCLB.506923.30  | hypothetical protein (pseudogene)                         | -0,4227 | 0,08955    |
| TcCLB.507005.20  | hypothetical protein, conserved                           | -0,4229 | 0,0007696  |
| TcCLB.506817.79  | kinteoplast poly(A) polymerase complex 1 subunit, putativ | -0,4229 | 0,008872   |
| TcCLB.509145.19  | hypothetical protein, conserved                           | -0,423  | 0,005241   |
| TcCLB.510747.18  | hypothetical protein, conserved                           | -0,4232 | 0,001284   |
| TcCLB.508637.130 | hypothetical protein, conserved                           | -0,4232 | 0,0915     |
| TcCLB.509729.29  | neurobeachin/beige protein, putative (fragment)           | -0,4233 | 0,0001006  |
| TcCLB.503805.3   | kinesin heavy chain, putative                             | -0,4234 | 0,01132    |
| TcCLB.509665.13  | trans-sialidase (pseudogene), putative                    | -0,4237 | 0,05099    |
| TcCLB.504159.90  | hypothetical protein, conserved                           | -0,4238 | 0,00000174 |
| TcCLB.508777.100 | cyclin 1 (CYC1)                                           | -0,424  | 0,0009675  |
| TcCLB.508163.50  | mucin-associated surface protein (MASP), putative         | -0,4241 | 0,05448    |
| TcCLB.510597.30  | hypothetical protein, conserved                           | -0,4243 | 1,417E-06  |
| TcCLB.505957.140 | trans-sialidase (pseudogene), putative                    | -0,4244 | 0,02961    |
| TcCLB.511745.50  | hypothetical protein, conserved                           | -0,4245 | 0,02791    |
| TcCLB.510679.90  | expression site-associated gene (ESAG-like, pseudogene),  | -0,4245 | 0,1375     |
| TcCLB.504155.280 | trans-sialidase (pseudogene), putative                    | -0,4246 | 0,02098    |
| TcCLB.507099.70  | hypothetical protein, conserved                           | -0,4248 | 6,609E-07  |
| TcCLB.509793.60  | hypothetical protein, conserved                           | -0,4248 | 0,00009337 |
| TcCLB.507165.10  | hypothetical protein, conserved                           | -0,4249 | 0,00134    |
| TcCLB.511259.149 | mucin-associated surface protein (MASP, pseudogene), p    | -0,4249 | 0,1905     |
| TcCLB.508325.60  | retrotransposon hot spot (RHS) protein, putative          | -0,4251 | 0,001433   |
| TcCLB.503985.20  | retrotransposon hot spot protein (RHS, pseudogene), puta  | -0,4252 | 0,0264     |
| TcCLB.508175.340 | hypothetical protein, conserved                           | -0,4255 | 1,226E-07  |
| TcCLB.506529.160 | hypothetical protein, conserved                           | -0,4255 | 0,0001439  |
| TcCLB.506709.30  | hypothetical protein, conserved                           | -0,4255 | 0,0001896  |
| TcCLB.510973.20  | hypothetical protein, conserved                           | -0,4256 | 0,00001613 |
| TcCLB.503525.20  | hypothetical protein, conserved                           | -0,4257 | 1,733E-06  |
| TcCLB.511423.50  | conserved protein, unknown function                       | -0,4259 | 8,567E-06  |
| TcCLB.510759.60  | vesicle-associated membrane protein, putative             | -0,4259 | 0,003508   |
| TcCLB.507049.41  | hypothetical protein, conserved                           | -0,4259 | 0,01433    |
| TcCLB.506303.30  | hypothetical protein, conserved                           | -0,4261 | 0,001553   |
| TcCLB.509973.25  | mucin TcMUC (pseudogene), putative                        | -0,4261 | 0,06235    |
| TcCLB.511183.480 | hypothetical protein, conserved (pseudogene)              | -0,4261 | 0,215      |

|                  |                                                           |         |            |
|------------------|-----------------------------------------------------------|---------|------------|
| TcCLB.509943.30  | ribosomal protein S6, putative                            | -0,4262 | 0,002591   |
| TcCLB.506709.50  | hypothetical protein, conserved                           | -0,4263 | 0,01949    |
| TcCLB.508173.240 | hypothetical protein, conserved                           | -0,4266 | 0,00144    |
| TcCLB.506289.200 | hypothetical protein                                      | -0,4267 | 0,1569     |
| TcCLB.508601.60  | hypothetical protein, conserved                           | -0,4268 | 0,0002317  |
| TcCLB.504093.10  | hypothetical protein, conserved (pseudogene)              | -0,427  | 2,531E-06  |
| TcCLB.510243.20  | hypothetical protein, conserved                           | -0,4273 | 0,0001718  |
| TcCLB.508595.30  | hypothetical protein (pseudogene)                         | -0,4273 | 0,003264   |
| TcCLB.510755.147 | hypothetical protein, conserved                           | -0,4274 | 0,003526   |
| TcCLB.509669.20  | subtilisin-like serine peptidase, putative                | -0,4279 | 2,434E-07  |
| TcCLB.505297.80  | trans-sialidase (pseudogene), putative                    | -0,428  | 0,007444   |
| TcCLB.508445.30  | protein kinase, putative                                  | -0,4283 | 0,0004313  |
| TcCLB.509945.20  | hypothetical protein, conserved                           | -0,4283 | 0,001291   |
| TcCLB.511283.80  | hypothetical protein, conserved                           | -0,4284 | 1,421E-07  |
| TcCLB.506863.80  | serine/threonine protein phosphatase, putative            | -0,4284 | 0,000105   |
| TcCLB.506975.49  | f-actin capping protein beta subunit, putative            | -0,4284 | 0,002051   |
| TcCLB.509069.49  | DNA replication licensing factor MCM7, putative (fragmer  | -0,4284 | 0,004425   |
| TcCLB.410199.30  | trans-sialidase, Group VI, putative                       | -0,4284 | 0,007638   |
| TcCLB.508509.30  | surface protease GP63 (pseudogene), putative              | -0,4285 | 0,1618     |
| TcCLB.509099.59  | hypothetical protein, conserved                           | -0,4286 | 0,0004153  |
| TcCLB.510275.405 | hypothetical protein                                      | -0,4286 | 0,1377     |
| TcCLB.511721.20  | hypothetical protein, conserved                           | -0,4286 | 0,1862     |
| TcCLB.508417.10  | hypothetical protein, conserved                           | -0,4289 | 3,192E-06  |
| TcCLB.503901.18  | hypothetical protein, conserved (fragment)                | -0,4291 | 0,00009829 |
| TcCLB.511407.40  | hypothetical protein, conserved                           | -0,4292 | 0,0001654  |
| TcCLB.504103.70  | hypothetical protein, conserved                           | -0,4293 | 0,0006779  |
| TcCLB.511821.60  | protein kinase, putative                                  | -0,4294 | 0,00003535 |
| TcCLB.511717.40  | hypothetical protein, conserved                           | -0,4294 | 0,005472   |
| TcCLB.510279.180 | mucin TcMUCII (pseudogene), putative                      | -0,4296 | 0,2901     |
| TcCLB.511491.30  | hypothetical protein, conserved                           | -0,4297 | 0,0001894  |
| TcCLB.510223.9   | hypothetical protein, conserved                           | -0,4297 | 0,2118     |
| TcCLB.506133.68  | mucin TcMUCII (pseudogene), putative                      | -0,4298 | 0,2591     |
| TcCLB.511211.150 | spindle pole body component alp6, putative                | -0,4299 | 0,00003599 |
| TcCLB.511305.20  | hypothetical protein, conserved                           | -0,4302 | 2,648E-07  |
| TcCLB.478283.10  | hypothetical protein, conserved (pseudogene)              | -0,4305 | 0,00557    |
| TcCLB.507941.20  | hypothetical protein, conserved                           | -0,4306 | 6,801E-08  |
| TcCLB.504411.30  | serine/threonine protein kinase, putative                 | -0,4306 | 0,00705    |
| TcCLB.504689.30  | trans-sialidase (pseudogene), putative                    | -0,4306 | 0,03355    |
| TcCLB.510889.352 | retrotransposon hot spot (RHS) protein, putative (fragmer | -0,4306 | 0,1365     |
| TcCLB.509267.50  | U5 small nuclear ribonucleoprotein component, putative    | -0,4309 | 2,824E-07  |
| TcCLB.506579.60  | hypothetical protein, conserved                           | -0,4309 | 0,0004199  |
| TcCLB.505009.30  | serine/threonine protein kinase, putative                 | -0,4311 | 0,0104     |
| TcCLB.510611.50  | hypothetical protein, conserved                           | -0,4313 | 0,0002331  |
| TcCLB.508521.11  | trans-sialidase (pseudogene), putative                    | -0,4313 | 0,01233    |
| TcCLB.508815.100 | hypothetical protein, conserved                           | -0,4314 | 0,0000116  |

|                  |                                                        |         |            |
|------------------|--------------------------------------------------------|---------|------------|
| TcCLB.509537.10  | pre-mRNA splicing factor ATP-dependent RNA helicase, p | -0,4316 | 0,0002522  |
| TcCLB.511915.20  | trans-sialidase (pseudogene), putative                 | -0,4317 | 0,007049   |
| TcCLB.509965.280 | hypothetical protein, conserved                        | -0,4318 | 0,001257   |
| TcCLB.510661.120 | hypothetical protein, conserved                        | -0,4319 | 0,0003279  |
| TcCLB.504171.50  | hypothetical protein, conserved                        | -0,432  | 1,071E-08  |
| TcCLB.509169.20  | hypothetical protein, conserved                        | -0,4321 | 0,00001951 |
| TcCLB.505949.50  | mucin-associated surface protein (MASP, pseudogene), p | -0,4321 | 0,3674     |
| TcCLB.507093.10  | hypothetical protein, conserved                        | -0,4322 | 2,731E-06  |
| TcCLB.511737.90  | hypothetical protein, conserved                        | -0,4323 | 0,0009486  |
| TcCLB.506739.70  | hypothetical protein, conserved                        | -0,4324 | 0,00005972 |
| TcCLB.510101.480 | hypothetical protein, conserved                        | -0,4328 | 0,0007033  |
| TcCLB.509989.10  | phosphatidylinositol 3-kinase, putative                | -0,433  | 0,005769   |
| TcCLB.507517.20  | DNA polymerase sigma-like protein, putative            | -0,4334 | 0,00048    |
| TcCLB.511067.14  | hypothetical protein, conserved                        | -0,4334 | 0,005065   |
| TcCLB.511131.60  | hypothetical protein, conserved                        | -0,4336 | 0,0008974  |
| TcCLB.506885.290 | DNA replication licensing factor MCM9, putative        | -0,4337 | 0,0000232  |
| TcCLB.509671.50  | hypothetical protein, conserved                        | -0,4337 | 0,003097   |
| TcCLB.503561.20  | hypothetical protein, conserved                        | -0,4345 | 0,0006046  |
| TcCLB.511517.95  | hypothetical protein, conserved                        | -0,4347 | 0,0376     |
| TcCLB.511151.20  | hypothetical protein, conserved                        | -0,4352 | 7,788E-07  |
| TcCLB.504883.30  | hypothetical protein, conserved                        | -0,4353 | 6,393E-07  |
| TcCLB.511055.50  | protein kinase, putative                               | -0,4353 | 0,0499     |
| TcCLB.507093.180 | transcription factor IIIb, putative                    | -0,4354 | 0,0000378  |
| TcCLB.508857.140 | hypothetical protein, conserved                        | -0,4354 | 0,00009506 |
| TcCLB.508479.290 | vacuolar sorting protein, putative                     | -0,4357 | 0,00792    |
| TcCLB.508413.30  | hypothetical protein, conserved                        | -0,4358 | 1,204E-06  |
| TcCLB.508707.170 | outer dynein arm docking complex, putative (DC2)       | -0,4358 | 0,00003221 |
| TcCLB.511001.200 | hypothetical protein, conserved                        | -0,4358 | 0,0004139  |
| TcCLB.510655.100 | hypothetical protein                                   | -0,4361 | 0,0005459  |
| TcCLB.504035.100 | hypothetical protein, conserved                        | -0,4363 | 4,306E-06  |
| TcCLB.508661.60  | GPI transamidase component Tta2, putative (TTA2)       | -0,4363 | 0,00002578 |
| TcCLB.511787.20  | trans-sialidase (pseudogene), putative                 | -0,4367 | 0,05109    |
| TcCLB.508507.9   | hypothetical protein, conserved                        | -0,4371 | 0,006205   |
| TcCLB.508739.50  | hypothetical protein                                   | -0,4372 | 0,001636   |
| TcCLB.508023.100 | trans-sialidase, Group IV, putative                    | -0,4372 | 0,02074    |
| TcCLB.509899.70  | hypothetical protein, conserved (pseudogene)           | -0,4374 | 3,859E-06  |
| TcCLB.503557.49  | hypothetical protein, conserved (fragment)             | -0,4374 | 0,03272    |
| TcCLB.506943.150 | hypothetical protein, conserved (pseudogene)           | -0,4375 | 0,0000108  |
| TcCLB.506753.80  | hypothetical protein, conserved                        | -0,4376 | 0,00003484 |
| TcCLB.511261.40  | hypothetical protein                                   | -0,4376 | 0,0001131  |
| TcCLB.506883.34  | hypothetical protein, conserved                        | -0,4376 | 0,0002807  |
| TcCLB.508075.30  | hypothetical protein, conserved (pseudogene)           | -0,4376 | 0,001236   |
| TcCLB.509059.89  | vacuolar assembly protein vps41, putative (fragment)   | -0,4376 | 0,0422     |
| TcCLB.507663.70  | hypothetical protein, conserved                        | -0,4377 | 0,001668   |
| TcCLB.506181.10  | hypothetical protein, conserved                        | -0,4378 | 0,0009609  |

|                  |                                                        |         |            |
|------------------|--------------------------------------------------------|---------|------------|
| TcCLB.511445.120 | hypothetical protein, conserved                        | -0,4379 | 0,00008638 |
| TcCLB.504105.200 | hypothetical protein, conserved                        | -0,438  | 4,488E-08  |
| TcCLB.509801.10  | hypothetical protein, conserved                        | -0,438  | 0,00009297 |
| TcCLB.509965.210 | hypothetical protein, conserved                        | -0,4383 | 0,08267    |
| TcCLB.509005.50  | hypothetical protein, conserved                        | -0,4384 | 5,045E-07  |
| TcCLB.506863.40  | hypothetical protein, conserved                        | -0,4384 | 0,01417    |
| TcCLB.511277.460 | hypothetical protein, conserved                        | -0,4385 | 0,0002193  |
| TcCLB.508645.50  | hypothetical protein, conserved                        | -0,4386 | 0,00001966 |
| TcCLB.511277.300 | hypothetical protein                                   | -0,4387 | 2,164E-07  |
| TcCLB.511153.150 | hypothetical protein                                   | -0,4387 | 0,002844   |
| TcCLB.506579.90  | hypothetical protein                                   | -0,4388 | 8,606E-06  |
| TcCLB.504123.10  | hypothetical protein, conserved                        | -0,4388 | 0,0001471  |
| TcCLB.506577.70  | hypothetical protein, conserved                        | -0,4388 | 0,0003507  |
| TcCLB.506883.90  | hypothetical protein, conserved                        | -0,4389 | 0,0003382  |
| TcCLB.504203.29  | tRNA-dihydrouridine synthase 2, putative               | -0,4391 | 0,006944   |
| TcCLB.506173.80  | hypothetical protein                                   | -0,4391 | 0,2481     |
| TcCLB.504021.100 | hypothetical protein, conserved                        | -0,4392 | 0,00006046 |
| TcCLB.508201.40  | mucin TcMUCII, putative                                | -0,4392 | 0,03821    |
| TcCLB.510201.70  | hypothetical protein                                   | -0,4392 | 0,1159     |
| TcCLB.510737.119 | hypothetical protein, conserved                        | -0,4394 | 0,0001828  |
| TcCLB.511803.60  | hypothetical protein, conserved                        | -0,4394 | 0,002939   |
| TcCLB.506411.25  | hypothetical protein, conserved (pseudogene)           | -0,4398 | 0,00857    |
| TcCLB.507753.3   | hypothetical protein, conserved (pseudogene)           | -0,44   | 0,04489    |
| TcCLB.511587.36  | N-acetyltransferase complex ARD1 subunit (pseudogene), | -0,44   | 0,09075    |
| TcCLB.511751.163 | hypothetical protein, conserved                        | -0,4401 | 0,0001121  |
| TcCLB.511907.290 | hypothetical protein, conserved                        | -0,4402 | 0,00001875 |
| TcCLB.506405.140 | hypothetical protein, conserved                        | -0,4403 | 0,00008208 |
| TcCLB.510819.70  | hypothetical protein, conserved                        | -0,4403 | 0,0003947  |
| TcCLB.510421.330 | hypothetical protein, conserved (fragment)             | -0,4406 | 1,595E-07  |
| TcCLB.507915.5   | glutaminyl-tRNA synthetase, putative                   | -0,4406 | 0,1851     |
| TcCLB.508479.140 | hypothetical protein, conserved                        | -0,4407 | 0,001156   |
| TcCLB.509167.170 | hypothetical protein, conserved                        | -0,4409 | 0,001308   |
| TcCLB.506905.40  | ABC transporter, putative                              | -0,441  | 0,002402   |
| TcCLB.508723.40  | hypothetical protein, conserved                        | -0,4414 | 6,029E-07  |
| TcCLB.510303.170 | hypothetical protein, conserved                        | -0,4416 | 2,676E-09  |
| TcCLB.506559.530 | protein phosphatase 2C, putative                       | -0,4416 | 0,00006421 |
| TcCLB.506839.30  | hypothetical protein, conserved                        | -0,4418 | 0,0008481  |
| TcCLB.508307.40  | hypothetical protein, conserved                        | -0,4418 | 0,001597   |
| TcCLB.510821.20  | hypothetical protein, conserved                        | -0,4419 | 5,841E-08  |
| TcCLB.508437.5   | mucin-like glycoprotein (pseudogene), putative         | -0,4421 | 0,21       |
| TcCLB.511431.20  | hypothetical protein, conserved                        | -0,4422 | 3,462E-10  |
| TcCLB.506955.198 | hypothetical protein                                   | -0,4424 | 0,03448    |
| TcCLB.511801.40  | hypothetical protein, conserved                        | -0,4425 | 0,000563   |
| TcCLB.510819.110 | ATP-dependent RNA helicase, putative                   | -0,4426 | 2,091E-07  |
| TcCLB.507729.20  | hypothetical protein, conserved (pseudogene)           | -0,4426 | 0,02727    |

|                  |                                                           |         |            |
|------------------|-----------------------------------------------------------|---------|------------|
| TcCLB.508613.50  | hypothetical protein, conserved                           | -0,4429 | 3,072E-08  |
| TcCLB.508153.600 | actin-like protein, putative                              | -0,4429 | 0,0003939  |
| TcCLB.504133.45  | hypothetical protein, conserved                           | -0,4429 | 0,03845    |
| TcCLB.507895.69  | hypothetical protein, conserved                           | -0,4432 | 0,02572    |
| TcCLB.511029.10  | enolase, putative                                         | -0,4437 | 0,00004749 |
| TcCLB.505999.40  | DNA repair protein BRCA2, putative                        | -0,4438 | 0,0003944  |
| TcCLB.508153.870 | hypothetical protein, conserved                           | -0,4445 | 2,274E-06  |
| TcCLB.506503.90  | kinesin, putative                                         | -0,445  | 0,007704   |
| TcCLB.508533.30  | metalloprotease, putative                                 | -0,4451 | 9,43E-08   |
| TcCLB.504013.70  | metallo-peptidase, Clan MC, Family M14                    | -0,4455 | 0,00001494 |
| TcCLB.506297.20  | hypothetical protein                                      | -0,4456 | 6,506E-08  |
| TcCLB.508707.210 | DNA replication licensing factor MCM7, putative           | -0,4456 | 0,00001133 |
| TcCLB.510597.9   | tousled-like kinase II, putative                          | -0,4457 | 0,0007156  |
| TcCLB.508707.180 | ubiquitin hydrolase, putative                             | -0,4458 | 2,374E-07  |
| TcCLB.510021.150 | hypothetical protein, conserved (pseudogene)              | -0,4459 | 0,03215    |
| TcCLB.506543.100 | hypothetical protein, conserved                           | -0,4462 | 0,0009976  |
| TcCLB.504155.250 | trans-sialidase (pseudogene), putative                    | -0,4462 | 0,2049     |
| TcCLB.509399.110 | hypothetical protein, conserved                           | -0,4463 | 9,831E-06  |
| TcCLB.511635.50  | hypothetical protein, conserved                           | -0,4467 | 0,001895   |
| TcCLB.508741.30  | hypothetical protein, conserved                           | -0,4468 | 0,00006169 |
| TcCLB.506223.100 | hypothetical protein, conserved                           | -0,4471 | 0,00007082 |
| TcCLB.506511.80  | hypothetical protein, conserved                           | -0,4472 | 2,953E-06  |
| TcCLB.507801.80  | hypothetical protein, conserved                           | -0,4473 | 0,003634   |
| TcCLB.507089.230 | hypothetical protein, conserved                           | -0,4474 | 1,433E-06  |
| TcCLB.510123.40  | hypothetical protein, conserved                           | -0,4475 | 0,01637    |
| TcCLB.505999.160 | leucine-rich repeat-containing protein                    | -0,4476 | 0,0001029  |
| TcCLB.511413.11  | hypothetical protein, conserved (pseudogene)              | -0,4476 | 0,0004473  |
| TcCLB.509599.40  | hypothetical protein, conserved                           | -0,4477 | 0,001052   |
| TcCLB.506941.20  | tRNA modification enzyme, putative                        | -0,4478 | 0,001      |
| TcCLB.511291.80  | hypothetical protein, conserved                           | -0,448  | 0,008302   |
| TcCLB.506789.200 | ubiquitin-conjugating enzyme E2, putative                 | -0,4481 | 1,583E-06  |
| TcCLB.506943.20  | hypothetical protein, conserved                           | -0,4482 | 0,00007513 |
| TcCLB.503773.20  | hypothetical protein, conserved                           | -0,4484 | 0,01398    |
| TcCLB.510939.20  | hypothetical protein, conserved                           | -0,4484 | 0,01441    |
| TcCLB.505365.50  | beta galactofuranosyl glycosyltransferase (pseudogene), f | -0,4484 | 0,01768    |
| TcCLB.504121.20  | hypothetical protein, conserved                           | -0,4486 | 0,0002464  |
| TcCLB.506469.60  | hypothetical protein                                      | -0,4491 | 0,01711    |
| TcCLB.506163.20  | surface protease GP63, putative                           | -0,4491 | 0,025      |
| TcCLB.510421.50  | hypothetical protein, conserved                           | -0,4493 | 0,00004382 |
| TcCLB.509267.20  | hypothetical protein                                      | -0,4494 | 0,0003355  |
| TcCLB.510743.130 | denn domain-containing protein (pseudogene)               | -0,4494 | 0,007214   |
| TcCLB.510053.40  | hypothetical protein, conserved                           | -0,4494 | 0,01141    |
| TcCLB.506477.40  | Tubulin/FtsZ family, putative                             | -0,4497 | 0,00000188 |
| TcCLB.508899.20  | hypothetical protein, conserved                           | -0,4498 | 1,675E-06  |
| TcCLB.504769.190 | trans-sialidase (pseudogene), putative                    | -0,4498 | 0,01912    |

|                  |                                                            |         |            |
|------------------|------------------------------------------------------------|---------|------------|
| TcCLB.507381.20  | trans-sialidase (pseudogene), putative                     | -0,45   | 0,002442   |
| TcCLB.504059.20  | endomembrane protein, putative                             | -0,4502 | 3,899E-07  |
| TcCLB.508177.30  | hypothetical protein, conserved                            | -0,4502 | 1,917E-06  |
| TcCLB.508121.120 | mucin TcMUCII, putative                                    | -0,4503 | 0,1361     |
| TcCLB.508889.4   | 5-oxoprolinase, putative                                   | -0,4506 | 0,04518    |
| TcCLB.506473.10  | Pre-mRNA-splicing factor 38, putative                      | -0,4507 | 0,002974   |
| TcCLB.509991.29  | cyclophilin 15, putative                                   | -0,4508 | 0,00001956 |
| TcCLB.509539.20  | receptor-type adenylate cyclase, putative                  | -0,4508 | 0,000365   |
| TcCLB.511063.30  | trans-sialidase (pseudogene), putative                     | -0,4508 | 0,05105    |
| TcCLB.510285.140 | hypothetical protein, conserved (fragment)                 | -0,451  | 0,1945     |
| TcCLB.511751.40  | DNA-J protein, putative                                    | -0,4511 | 0,001291   |
| TcCLB.503965.10  | hypothetical protein, conserved                            | -0,4512 | 0,0005268  |
| TcCLB.510693.60  | retrotransposon hot spot protein (RHS, pseudogene), puta   | -0,4513 | 0,1756     |
| TcCLB.511511.120 | hypothetical protein, conserved                            | -0,4521 | 0,00003017 |
| TcCLB.503583.10  | metallo-peptidase, Clan MC, Family M14, putative           | -0,4521 | 0,00009302 |
| TcCLB.506399.40  | hypothetical protein, conserved                            | -0,4521 | 0,02022    |
| TcCLB.510323.80  | hypothetical protein, conserved                            | -0,4523 | 1,618E-06  |
| TcCLB.504113.10  | protein kinase, putative                                   | -0,4523 | 0,000388   |
| TcCLB.504839.60  | hypothetical protein, conserved                            | -0,4524 | 0,00001398 |
| TcCLB.508159.50  | mucin-associated surface protein (MASP, pseudogene), pi    | -0,4524 | 0,03584    |
| TcCLB.509317.29  | hypothetical protein                                       | -0,4526 | 0,02044    |
| TcCLB.506947.50  | hypothetical protein, conserved                            | -0,4527 | 0,0001632  |
| TcCLB.503917.50  | hypothetical protein, conserved                            | -0,4528 | 0,0003956  |
| TcCLB.510329.220 | hypothetical protein, conserved                            | -0,4533 | 6,649E-06  |
| TcCLB.509073.40  | outer dynein arm docking complex protein (DC2)             | -0,4533 | 0,00001412 |
| TcCLB.509063.4   | hypothetical protein, conserved                            | -0,4533 | 0,008872   |
| TcCLB.511491.170 | quiescin sulfhydryl oxidase, putative (QSOX)               | -0,4534 | 2,615E-06  |
| TcCLB.462761.4   | hypothetical protein, conserved                            | -0,4534 | 0,005511   |
| TcCLB.506211.120 | hypothetical protein, conserved                            | -0,4538 | 0,00003043 |
| TcCLB.511731.30  | serine/threonine protein phosphatase, putative             | -0,4539 | 0,00001747 |
| TcCLB.505931.10  | surface protease GP63, putative                            | -0,4541 | 0,0004335  |
| TcCLB.506717.130 | trans-sialidase (pseudogene), putative                     | -0,4545 | 0,00008641 |
| TcCLB.503893.50  | hypothetical protein, conserved                            | -0,4547 | 0,00011    |
| TcCLB.510749.74  | hypothetical protein, conserved                            | -0,4548 | 0,00002625 |
| TcCLB.509213.60  | hypothetical protein, conserved                            | -0,4548 | 0,004651   |
| TcCLB.404001.4   | metalloprotease, putative (fragment)                       | -0,4549 | 9,708E-08  |
| TcCLB.511367.260 | Peptidase C19, ubiquitin carboxyl-terminal hydrolase, puta | -0,4549 | 1,901E-07  |
| TcCLB.510989.10  | fatty acid elongase, putative                              | -0,4549 | 0,0003305  |
| TcCLB.506435.230 | hypothetical protein, conserved (pseudogene)               | -0,455  | 0,0006165  |
| TcCLB.511067.4   | phosphatidylinositol 3-kinase, putative                    | -0,4551 | 0,0009643  |
| TcCLB.509499.4   | hypothetical protein, conserved                            | -0,4552 | 0,001866   |
| TcCLB.509443.39  | hypothetical protein, conserved                            | -0,4554 | 0,00181    |
| TcCLB.510765.50  | hypothetical protein, conserved                            | -0,4555 | 0,0004668  |
| TcCLB.508737.50  | hypothetical protein, conserved                            | -0,4555 | 0,003578   |
| TcCLB.511137.10  | hypothetical protein, conserved                            | -0,4556 | 0,00204    |

|                  |                                                           |         |            |
|------------------|-----------------------------------------------------------|---------|------------|
| TcCLB.507515.70  | hypothetical protein, conserved                           | -0,4557 | 2,633E-07  |
| TcCLB.509965.319 | hypothetical protein, conserved                           | -0,4557 | 3,942E-06  |
| TcCLB.506563.60  | hypothetical protein, conserved                           | -0,4558 | 0,0002763  |
| TcCLB.506455.10  | retrotransposon hot spot protein (RHS, pseudogene), puta  | -0,4558 | 0,01352    |
| TcCLB.511709.19  | phosphatidylinositol 3-kinase catalytic subunit, putative | -0,4559 | 0,002703   |
| TcCLB.506363.60  | f-actin capping protein beta subunit, putative            | -0,4561 | 0,0004281  |
| TcCLB.509127.59  | hypothetical protein, conserved                           | -0,4561 | 0,04596    |
| TcCLB.510731.40  | katanin, putative                                         | -0,4562 | 0,0003135  |
| TcCLB.510187.270 | transmembrane emp24 domain-containing protein             | -0,4564 | 0,0002843  |
| TcCLB.507395.20  | hypothetical protein, conserved                           | -0,4565 | 0,001281   |
| TcCLB.510689.50  | cell differentiation protein, putative                    | -0,4566 | 0,00002313 |
| TcCLB.506445.110 | nucleobase transporter, putative                          | -0,4567 | 3,512E-08  |
| TcCLB.511273.50  | hypothetical protein, conserved                           | -0,4567 | 0,00009471 |
| TcCLB.508789.130 | surface protease GP63 (pseudogene), putative              | -0,4567 | 0,1374     |
| TcCLB.507257.110 | hypothetical protein, conserved                           | -0,4568 | 0,0007679  |
| TcCLB.507031.50  | hypothetical protein, conserved                           | -0,4568 | 0,009206   |
| TcCLB.509163.105 | ATP-dependent DEAD/H RNA helicase (pseudogene), puta      | -0,4569 | 0,2658     |
| TcCLB.506529.290 | hypothetical protein, conserved                           | -0,457  | 0,0001472  |
| TcCLB.508209.20  | hypothetical protein, conserved                           | -0,457  | 0,002557   |
| TcCLB.506559.440 | hypothetical protein, conserved                           | -0,4571 | 5,363E-10  |
| TcCLB.509849.40  | mannosyl-oligosaccharide 1,2-alpha-mannosidase IB, puta   | -0,4571 | 0,004863   |
| TcCLB.508153.110 | hypothetical protein                                      | -0,4576 | 0,002587   |
| TcCLB.508277.200 | hypothetical protein, conserved                           | -0,4577 | 0,0001402  |
| TcCLB.506541.10  | hypothetical protein, conserved (pseudogene)              | -0,4578 | 0,1327     |
| TcCLB.510285.80  | hypothetical protein, conserved                           | -0,4582 | 0,002179   |
| TcCLB.508207.279 | hypothetical protein, conserved                           | -0,4584 | 0,0008738  |
| TcCLB.506135.20  | hypothetical protein, conserved                           | -0,4585 | 4,379E-08  |
| TcCLB.506985.60  | inositol polyphosphate kinase-like protein, putative      | -0,4586 | 0,0001596  |
| TcCLB.508999.30  | Pre-mRNA-splicing factor 38, putative                     | -0,4587 | 0,01289    |
| TcCLB.511841.10  | trans-sialidase (pseudogene), putative                    | -0,4589 | 0,1988     |
| TcCLB.510667.10  | hypothetical protein, conserved                           | -0,459  | 0,0007848  |
| TcCLB.508825.10  | surface protease GP63, putative                           | -0,4593 | 0,0009758  |
| TcCLB.507731.60  | trans-sialidase, putative                                 | -0,4594 | 0,1188     |
| TcCLB.511633.79  | microtubule-associated protein, putative                  | -0,4595 | 0,0006379  |
| TcCLB.510723.10  | hypothetical protein, conserved                           | -0,4595 | 0,02084    |
| TcCLB.505009.4   | hypothetical protein, conserved                           | -0,4596 | 0,0524     |
| TcCLB.511729.9   | calmodulin, putative                                      | -0,4597 | 0,01211    |
| TcCLB.509205.50  | hypothetical protein, conserved                           | -0,4599 | 0,00003869 |
| TcCLB.507949.20  | RWD domain-containing protein                             | -0,46   | 0,0002666  |
| TcCLB.508153.720 | hypothetical protein, conserved                           | -0,4602 | 0,006082   |
| TcCLB.503909.40  | hypothetical protein                                      | -0,4604 | 0,009391   |
| TcCLB.506885.370 | hypothetical protein, conserved                           | -0,4608 | 0,003122   |
| TcCLB.511753.40  | hypothetical protein, conserved                           | -0,4609 | 0,007813   |
| TcCLB.510503.50  | trans-sialidase, Group V, putative                        | -0,4612 | 0,01182    |
| TcCLB.506205.40  | protein kinase, putative                                  | -0,4613 | 0,00003837 |



|                  |                                                        |         |            |
|------------------|--------------------------------------------------------|---------|------------|
| TcCLB.503477.20  | transaldolase, putative                                | -0,4615 | 0,00002157 |
| TcCLB.505939.40  | hypothetical protein, conserved                        | -0,4615 | 0,0001898  |
| TcCLB.508323.190 | serine/threonine protein phosphatase, putative         | -0,4615 | 0,0004551  |
| TcCLB.439307.19  | hypothetical protein, conserved                        | -0,4619 | 0,09386    |
| TcCLB.506247.170 | ATPase, putative                                       | -0,462  | 5,949E-07  |
| TcCLB.506351.60  | hypothetical protein, conserved                        | -0,4623 | 0,00004945 |
| TcCLB.510879.100 | hypothetical protein                                   | -0,4623 | 0,0001035  |
| TcCLB.506799.120 | hypothetical protein                                   | -0,4623 | 0,02635    |
| TcCLB.508873.439 | mucin TcMUCII (pseudogene), putative                   | -0,4623 | 0,2445     |
| TcCLB.510533.150 | hypothetical protein                                   | -0,4624 | 5,23E-07   |
| TcCLB.503453.80  | hypothetical protein, conserved                        | -0,4624 | 0,0001195  |
| TcCLB.427091.10  | solanesyl-diphosphate synthase, putative               | -0,4624 | 0,00055    |
| TcCLB.510693.314 | mucin TcMUCII (pseudogene), putative                   | -0,4625 | 0,01673    |
| TcCLB.508367.50  | hypothetical protein, conserved (pseudogene)           | -0,4625 | 0,03902    |
| TcCLB.506609.15  | hypothetical protein (pseudogene)                      | -0,4626 | 0,1037     |
| TcCLB.506749.10  | flagellar calcium-binding-like protein, putative       | -0,4633 | 3,474E-08  |
| TcCLB.511767.10  | trans-sialidase, putative                              | -0,4633 | 0,07588    |
| TcCLB.508859.20  | hypothetical protein, conserved                        | -0,4636 | 0,0001491  |
| TcCLB.507677.120 | hypothetical protein, conserved                        | -0,4637 | 1,017E-06  |
| TcCLB.507011.100 | hypothetical protein, conserved                        | -0,4637 | 0,00002422 |
| TcCLB.511127.369 | hypothetical protein, conserved                        | -0,4638 | 0,00003362 |
| TcCLB.508525.10  | hypothetical protein, conserved                        | -0,4638 | 0,0005909  |
| TcCLB.509203.60  | histone acetyltransferase, putative                    | -0,4639 | 0,0002534  |
| TcCLB.506797.50  | hypothetical protein, conserved                        | -0,464  | 1,235E-06  |
| TcCLB.504035.110 | hypothetical protein                                   | -0,464  | 0,0001262  |
| TcCLB.509905.10  | trans-sialidase (pseudogene), putative                 | -0,4641 | 0,00001477 |
| TcCLB.506297.240 | pretranslocation protein, alpha subunit, putative      | -0,4642 | 7,146E-09  |
| TcCLB.503787.65  | hypothetical protein (pseudogene)                      | -0,4642 | 0,1772     |
| TcCLB.506859.120 | hypothetical protein                                   | -0,4645 | 0,00002859 |
| TcCLB.505949.110 | hypothetical protein, conserved (pseudogene)           | -0,4645 | 0,2416     |
| TcCLB.509819.49  | Myotubularin-related protein, putative (fragment)      | -0,4646 | 0,000647   |
| TcCLB.503489.10  | metallo-peptidase, Clan MC, Family M14, putative       | -0,4647 | 3,486E-07  |
| TcCLB.506831.79  | pre-mRNA splicing factor ATP-dependent RNA helicase, p | -0,4647 | 0,02622    |
| TcCLB.506573.34  | hypothetical protein, conserved                        | -0,4647 | 0,05908    |
| TcCLB.510283.50  | hypothetical protein, conserved                        | -0,4652 | 0,003221   |
| TcCLB.507621.5   | trans-sialidase (pseudogene), putative                 | -0,4654 | 0,08539    |
| TcCLB.508805.90  | hypothetical protein, conserved                        | -0,4657 | 0,06538    |
| TcCLB.510497.190 | hypothetical protein                                   | -0,4657 | 0,2414     |
| TcCLB.511589.140 | phosphoenolpyruvate mutase, putative                   | -0,4658 | 3,995E-06  |
| TcCLB.508351.30  | hypothetical protein, conserved                        | -0,4658 | 0,00000653 |
| TcCLB.509215.13  | hypothetical protein, conserved                        | -0,4661 | 0,03378    |
| TcCLB.506825.70  | serine-threonine dehydratase, putative                 | -0,4662 | 0,009606   |
| TcCLB.510191.31  | trans-sialidase (pseudogene), putative                 | -0,4663 | 0,2048     |
| TcCLB.507389.10  | hypothetical protein, conserved                        | -0,4665 | 0,0002751  |
| TcCLB.506459.235 | hypothetical protein, conserved                        | -0,4665 | 0,01053    |

|                  |                                                             |         |            |
|------------------|-------------------------------------------------------------|---------|------------|
| TcCLB.508739.30  | hypothetical protein                                        | -0,4666 | 0,000619   |
| TcCLB.509065.79  | hypothetical protein, conserved                             | -0,4667 | 0,00001207 |
| TcCLB.504249.15  | surface protease GP63 (pseudogene), putative                | -0,4668 | 0,06658    |
| TcCLB.506623.30  | hypothetical protein                                        | -0,4669 | 0,101      |
| TcCLB.511255.110 | trans-sialidase (pseudogene), putative                      | -0,467  | 0,1183     |
| TcCLB.503765.10  | trans-sialidase (pseudogene), putative                      | -0,4673 | 0,005538   |
| TcCLB.506513.180 | hypothetical protein, conserved                             | -0,4676 | 0,00001479 |
| TcCLB.508187.10  | vacuolar protein sorting-associated protein, putative (frag | -0,4678 | 0,0000276  |
| TcCLB.508707.130 | hypothetical protein, conserved                             | -0,4679 | 0,00002079 |
| TcCLB.505037.157 | trans-sialidase (pseudogene), putative                      | -0,4679 | 0,0004803  |
| TcCLB.504881.14  | hypothetical protein, conserved                             | -0,468  | 0,015      |
| TcCLB.506111.10  | retrotransposon hot spot protein (RHS, pseudogene), puta    | -0,4681 | 0,0001259  |
| TcCLB.506151.10  | hypothetical protein, conserved                             | -0,4683 | 0,00001436 |
| TcCLB.508165.380 | hypothetical protein                                        | -0,4683 | 0,2336     |
| TcCLB.506257.70  | hypothetical protein, conserved                             | -0,4684 | 0,00004577 |
| TcCLB.506767.170 | trans-sialidase (pseudogene), putative                      | -0,4685 | 0,03464    |
| TcCLB.510973.50  | hypothetical protein, conserved                             | -0,4688 | 0,00007119 |
| TcCLB.507641.14  | neurobeachin/beige protein, putative                        | -0,469  | 2,688E-07  |
| TcCLB.503809.90  | glycerol uptake protein, putative                           | -0,469  | 0,00001777 |
| TcCLB.503897.100 | hypothetical protein, conserved                             | -0,4693 | 1,506E-06  |
| TcCLB.503959.50  | hypothetical protein, conserved                             | -0,4693 | 0,0001268  |
| TcCLB.506817.60  | hypothetical protein, conserved                             | -0,4693 | 0,0001695  |
| TcCLB.508939.10  | trans-sialidase (pseudogene), putative                      | -0,4693 | 0,005131   |
| TcCLB.504123.20  | hypothetical protein, conserved                             | -0,4694 | 0,00001937 |
| TcCLB.430605.20  | PTP1-interacting protein, 39 kDa, putative                  | -0,4697 | 3,097E-07  |
| TcCLB.506113.83  | ATP-dependent DEAD/H RNA helicase (pseudogene), puta        | -0,4698 | 0,01393    |
| TcCLB.506203.40  | hypothetical protein, conserved                             | -0,4702 | 2,397E-08  |
| TcCLB.510643.180 | trans-sialidase (pseudogene), putative                      | -0,4702 | 0,0003879  |
| TcCLB.504625.90  | hypothetical protein, conserved                             | -0,4707 | 0,0002054  |
| TcCLB.509747.100 | hypothetical protein, conserved                             | -0,4708 | 1,655E-08  |
| TcCLB.508397.50  | hypothetical protein, conserved                             | -0,4713 | 0,0000211  |
| TcCLB.506327.80  | serine/threonine protein kinase, putative                   | -0,4713 | 0,0002736  |
| TcCLB.507629.39  | hypothetical protein, conserved (fragment)                  | -0,4714 | 1,1E-09    |
| TcCLB.509315.10  | hypothetical protein, conserved (pseudogene)                | -0,4714 | 0,0834     |
| TcCLB.508707.90  | proteasome regulatory non-ATPase subunit 7, putative        | -0,4715 | 7,094E-08  |
| TcCLB.503913.29  | hypothetical protein, conserved                             | -0,4715 | 0,01226    |
| TcCLB.508827.44  | hypothetical protein, conserved                             | -0,4717 | 0,0001099  |
| TcCLB.503829.50  | hypothetical protein, conserved                             | -0,4717 | 0,0003078  |
| TcCLB.509991.70  | hypothetical protein, conserved (pseudogene)                | -0,472  | 0,00005464 |
| TcCLB.506425.160 | hypothetical protein, conserved                             | -0,472  | 0,0001249  |
| TcCLB.437575.9   | GDP-mannose 4,6 dehydratase, putative                       | -0,472  | 0,06862    |
| TcCLB.509167.70  | hypothetical protein, conserved                             | -0,4721 | 0,0001794  |
| TcCLB.504105.190 | hypothetical protein, conserved                             | -0,4723 | 0,00002852 |
| TcCLB.504741.170 | dual specificity protein phosphatase, putative              | -0,4723 | 0,001747   |
| TcCLB.505943.20  | oxidoreductase, putative                                    | -0,4725 | 0,0008162  |

|                  |                                                          |         |            |
|------------------|----------------------------------------------------------|---------|------------|
| TcCLB.508199.30  | hypothetical protein, conserved                          | -0,4726 | 0,00009305 |
| TcCLB.510515.80  | hypothetical protein, conserved                          | -0,4727 | 3,862E-07  |
| TcCLB.503775.30  | syntaxin binding protein (pseudogene), putative          | -0,4727 | 0,002428   |
| TcCLB.511181.30  | Iron-sulfur assembly protein 2, putative (Isa2)          | -0,4728 | 0,008607   |
| TcCLB.510141.10  | thymine-7-hydroxylase, putative                          | -0,4728 | 0,05334    |
| TcCLB.504213.60  | hypothetical protein, conserved                          | -0,4729 | 1,509E-06  |
| TcCLB.508089.30  | hypothetical protein, conserved                          | -0,4729 | 3,693E-06  |
| TcCLB.511165.60  | DNA repair protein, putative                             | -0,473  | 0,0001565  |
| TcCLB.511421.217 | hypothetical protein, conserved                          | -0,4731 | 0,0002929  |
| TcCLB.506425.30  | hypothetical protein, conserved                          | -0,4734 | 5,546E-07  |
| TcCLB.511449.70  | trans-sialidase, Group V, putative                       | -0,4735 | 0,07672    |
| TcCLB.504117.20  | sedoheptulose-1,7-bisphosphatase, putative               | -0,4737 | 0,001463   |
| TcCLB.506955.90  | trans-sialidase (pseudogene), putative                   | -0,4739 | 0,07351    |
| TcCLB.510461.20  | trans-sialidase (pseudogene), putative                   | -0,4739 | 0,2292     |
| TcCLB.511217.30  | diacylglycerol kinase, putative                          | -0,4741 | 5,142E-06  |
| TcCLB.510759.200 | hypothetical protein, conserved                          | -0,4741 | 0,00001352 |
| TcCLB.511715.20  | protein kinase, putative                                 | -0,4746 | 0,00001373 |
| TcCLB.511559.70  | phospholipid transporting ATPase-like protein (pseudogen | -0,4747 | 6,253E-06  |
| TcCLB.507445.20  | trans-sialidase (pseudogene), putative                   | -0,4748 | 0,00006646 |
| TcCLB.506735.60  | hypothetical protein, conserved                          | -0,4749 | 0,004041   |
| TcCLB.508837.154 | hypothetical protein, conserved                          | -0,475  | 0,000945   |
| TcCLB.506869.20  | hypothetical protein, conserved                          | -0,4752 | 0,000121   |
| TcCLB.511277.483 | hypothetical protein, conserved                          | -0,4752 | 0,0007438  |
| TcCLB.505943.10  | hypothetical protein, conserved                          | -0,4756 | 0,004142   |
| TcCLB.506205.49  | hypothetical protein, conserved                          | -0,4756 | 0,1465     |
| TcCLB.510307.245 | elongation factor 1-gamma (EF-1-gamma, pseudogene),      | -0,4756 | 0,1594     |
| TcCLB.509789.10  | hypothetical protein, conserved                          | -0,4757 | 3,605E-07  |
| TcCLB.511127.190 | hypothetical protein, conserved                          | -0,4757 | 8,406E-06  |
| TcCLB.508787.10  | hypothetical protein, conserved                          | -0,4757 | 0,0001526  |
| TcCLB.511511.70  | hypothetical protein, conserved                          | -0,4758 | 1,102E-08  |
| TcCLB.511885.35  | trans-sialidase (pseudogene), putative                   | -0,4759 | 0,01644    |
| TcCLB.510825.30  | phospholipase B-like, putative (p67)                     | -0,476  | 3,274E-10  |
| TcCLB.506955.115 | surface protease GP63 (pseudogene), putative             | -0,476  | 0,1724     |
| TcCLB.507257.40  | hypothetical protein, conserved                          | -0,4762 | 0,009354   |
| TcCLB.410589.19  | hypothetical protein, conserved                          | -0,4765 | 0,004304   |
| TcCLB.503797.7   | hypothetical protein, conserved (pseudogene)             | -0,4768 | 0,0000228  |
| TcCLB.506213.120 | ATP-dependent RNA helicase, putative                     | -0,4768 | 0,0000759  |
| TcCLB.510661.260 | hypothetical protein, conserved                          | -0,4769 | 6,424E-08  |
| TcCLB.506471.50  | trans-sialidase (pseudogene), putative                   | -0,477  | 0,0000127  |
| TcCLB.508613.100 | surface protease GP63 (pseudogene), putative             | -0,477  | 0,03258    |
| TcCLB.506625.180 | hypothetical protein, conserved                          | -0,4772 | 2,772E-06  |
| TcCLB.511725.134 | mitochondrial carrier protein, putative                  | -0,4774 | 3,216E-06  |
| TcCLB.508429.10  | hypothetical protein                                     | -0,4774 | 0,09526    |
| TcCLB.508405.10  | cell division cycle protein, putative                    | -0,4776 | 6,258E-06  |
| TcCLB.507825.10  | hypothetical protein, conserved                          | -0,4776 | 0,001158   |

|                  |                                                        |         |            |
|------------------|--------------------------------------------------------|---------|------------|
| TcCLB.509875.25  | trans-sialidase (pseudogene), putative                 | -0,4776 | 0,1301     |
| TcCLB.509939.19  | hypothetical protein, conserved                        | -0,4781 | 4,093E-08  |
| TcCLB.506825.100 | hypothetical protein, conserved                        | -0,4781 | 0,00008769 |
| TcCLB.511127.40  | hypothetical protein                                   | -0,4781 | 0,0003927  |
| TcCLB.508153.140 | protein kinase, putative                               | -0,4781 | 0,00334    |
| TcCLB.506591.81  | hypothetical protein, conserved (pseudogene)           | -0,4783 | 0,0002514  |
| TcCLB.510609.65  | U6 snRNA-associated Sm-like protein LSm3p              | -0,4783 | 0,04317    |
| TcCLB.510161.10  | hypothetical protein, conserved                        | -0,4784 | 0,0001142  |
| TcCLB.506409.10  | hypothetical protein                                   | -0,4785 | 0,1592     |
| TcCLB.509161.90  | hypothetical protein, conserved                        | -0,4787 | 0,0006065  |
| TcCLB.510863.9   | hypothetical protein                                   | -0,4789 | 0,005858   |
| TcCLB.508873.150 | mucin TcMUCII, putative                                | -0,4794 | 0,2632     |
| TcCLB.504147.150 | ATP-dependent DEAD/H RNA helicase, putative            | -0,4796 | 3,085E-10  |
| TcCLB.510431.320 | hypothetical protein, conserved                        | -0,4799 | 1,556E-06  |
| TcCLB.507733.40  | hypothetical protein, conserved (pseudogene)           | -0,4803 | 0,09695    |
| TcCLB.504207.10  | hypothetical protein, conserved                        | -0,4804 | 0,00008237 |
| TcCLB.506739.160 | hypothetical protein, conserved                        | -0,4809 | 4,693E-06  |
| TcCLB.509537.50  | Flagellar Member 1 (FLAM1)                             | -0,4813 | 1,856E-07  |
| TcCLB.509179.220 | hypothetical protein, conserved                        | -0,4817 | 0,0003459  |
| TcCLB.505555.40  | hypothetical protein, conserved                        | -0,4818 | 1,291E-06  |
| TcCLB.506321.40  | mucin TcMUCII, putative                                | -0,4822 | 0,0001042  |
| TcCLB.510091.30  | hypothetical protein, conserved                        | -0,4825 | 0,00002292 |
| TcCLB.507103.10  | DnaJ chaperone protein, putative                       | -0,4826 | 0,00003919 |
| TcCLB.510887.14  | chaperone DNAJ protein, putative                       | -0,4827 | 5,882E-06  |
| TcCLB.510765.30  | COP-coated vesicle membrane protein gp25L precursor, p | -0,4827 | 0,00001442 |
| TcCLB.506223.20  | hypothetical protein, conserved                        | -0,4828 | 0,0001387  |
| TcCLB.509963.10  | hypothetical protein, conserved (fragment)             | -0,4829 | 0,001827   |
| TcCLB.508921.30  | Kinesin-13 4, putative (KIN13-4)                       | -0,4831 | 0,002245   |
| TcCLB.505075.10  | hypothetical protein, conserved                        | -0,4833 | 0,0001196  |
| TcCLB.506499.215 | elongation factor 1-gamma (EF-1-gamma, pseudogene),    | -0,4834 | 0,1808     |
| TcCLB.506559.180 | hypothetical protein, conserved                        | -0,4838 | 2,317E-06  |
| TcCLB.508175.180 | hypothetical protein, conserved                        | -0,4839 | 1,06E-07   |
| TcCLB.511715.40  | hypothetical protein, conserved                        | -0,4839 | 0,005131   |
| TcCLB.511181.10  | hypothetical protein, conserved                        | -0,4844 | 3,226E-06  |
| TcCLB.503739.20  | trans-sialidase (pseudogene), putative                 | -0,4846 | 0,0005596  |
| TcCLB.506905.59  | SNF2 DNA repair protein, putative (fragment)           | -0,4847 | 3,644E-07  |
| TcCLB.508899.110 | actin-related protein 2, putative                      | -0,4848 | 0,00002131 |
| TcCLB.506883.50  | Present in the outer mitochondrial membrane proteome 5 | -0,4849 | 1,911E-06  |
| TcCLB.506579.20  | hypothetical protein, conserved                        | -0,4851 | 0,00003599 |
| TcCLB.507675.20  | hypothetical protein, conserved                        | -0,4852 | 2,055E-07  |
| TcCLB.510575.40  | hypothetical protein, conserved                        | -0,4853 | 0,00007185 |
| TcCLB.508181.90  | hypothetical protein, conserved (pseudogene)           | -0,4856 | 7,181E-07  |
| TcCLB.504021.120 | hypothetical protein, conserved                        | -0,4856 | 3,641E-06  |
| TcCLB.508177.50  | hypothetical protein                                   | -0,4858 | 0,0004151  |
| TcCLB.508331.50  | hypothetical protein, conserved                        | -0,4859 | 0,00001777 |

|                  |                                                          |         |            |
|------------------|----------------------------------------------------------|---------|------------|
| TcCLB.507711.80  | hypothetical protein, conserved                          | -0,4859 | 0,00007513 |
| TcCLB.511851.61  | mucin-associated surface protein (MASP, pseudogene), pi  | -0,4862 | 0,1464     |
| TcCLB.506267.48  | hypothetical protein                                     | -0,4863 | 0,01868    |
| TcCLB.510695.10  | surface protease GP63 (pseudogene), putative             | -0,4864 | 0,008711   |
| TcCLB.509901.100 | hypothetical protein, conserved                          | -0,4866 | 3,36E-10   |
| TcCLB.506841.8   | hypothetical protein, conserved                          | -0,4866 | 2,965E-08  |
| TcCLB.511895.60  | hypothetical protein, conserved                          | -0,4866 | 0,0001423  |
| TcCLB.511287.64  | hypothetical protein, conserved                          | -0,4868 | 0,001218   |
| TcCLB.507951.90  | hypothetical protein, conserved                          | -0,4869 | 0,0000458  |
| TcCLB.503703.20  | hypothetical protein, conserved                          | -0,4873 | 0,0000194  |
| TcCLB.506865.40  | guanine nucleotide exchange factor subunit GCD7          | -0,4874 | 9,398E-07  |
| TcCLB.510029.30  | hypothetical protein, conserved                          | -0,4878 | 0,0000024  |
| TcCLB.510257.90  | autophagocytosis associated protein, putative            | -0,488  | 0,0008528  |
| TcCLB.507887.20  | ubiquitin hydrolase, putative                            | -0,4881 | 5,979E-10  |
| TcCLB.510607.51  | retrotransposon hot spot protein (RHS, pseudogene), puta | -0,4883 | 0,1159     |
| TcCLB.506619.90  | ABC transporter family-like protein                      | -0,4887 | 0,0001098  |
| TcCLB.509005.70  | hypothetical protein, conserved                          | -0,4888 | 0,00002997 |
| TcCLB.507089.70  | RNA-binding protein, putative                            | -0,4893 | 0,0005033  |
| TcCLB.504147.110 | asparaginase, putative                                   | -0,4893 | 0,002158   |
| TcCLB.511215.110 | hypothetical protein, conserved                          | -0,4895 | 1,005E-06  |
| TcCLB.508207.190 | hypothetical protein, conserved                          | -0,4897 | 5,541E-06  |
| TcCLB.504179.30  | hypothetical protein, conserved                          | -0,4898 | 0,0001333  |
| TcCLB.509769.30  | hypothetical protein, conserved                          | -0,4902 | 0,008626   |
| TcCLB.511625.120 | hypothetical protein                                     | -0,4905 | 0,171      |
| TcCLB.503789.30  | hypothetical protein, conserved                          | -0,4907 | 0,001525   |
| TcCLB.509033.70  | hypothetical protein, conserved                          | -0,4908 | 0,0001517  |
| TcCLB.503999.80  | hypothetical protein, conserved                          | -0,4909 | 3,921E-10  |
| TcCLB.508411.80  | hypothetical protein, conserved                          | -0,4909 | 0,0000193  |
| TcCLB.506367.89  | hypothetical protein, conserved                          | -0,491  | 0,0007031  |
| TcCLB.503763.50  | trans-sialidase (pseudogene), putative                   | -0,4911 | 0,00008689 |
| TcCLB.511717.160 | hypothetical protein                                     | -0,4911 | 0,0002023  |
| TcCLB.511577.50  | endo-beta-N-acetylglucosaminidase, putative              | -0,4914 | 0,00002613 |
| TcCLB.503885.70  | hypothetical protein, conserved                          | -0,4914 | 0,0009107  |
| TcCLB.506297.40  | hypothetical protein, conserved                          | -0,4915 | 3,051E-13  |
| TcCLB.508479.174 | hypothetical protein, conserved                          | -0,4915 | 5,112E-06  |
| TcCLB.508771.40  | hypothetical protein, conserved                          | -0,4921 | 0,000818   |
| TcCLB.509445.20  | hypothetical protein, conserved                          | -0,4922 | 4,653E-08  |
| TcCLB.510901.170 | hypothetical protein, conserved                          | -0,4925 | 6,491E-08  |
| TcCLB.509399.60  | hypothetical protein, conserved                          | -0,4925 | 1,392E-07  |
| TcCLB.507951.130 | hypothetical protein                                     | -0,4925 | 0,00003352 |
| TcCLB.506753.70  | hypothetical protein, conserved                          | -0,4925 | 0,0001067  |
| TcCLB.507895.31  | retrotransposon hot spot protein (RHS, pseudogene), puta | -0,4926 | 0,02699    |
| TcCLB.507809.50  | hypothetical protein, conserved                          | -0,4932 | 0,0008344  |
| TcCLB.503565.29  | hypothetical protein, conserved                          | -0,4933 | 6,057E-07  |
| TcCLB.504883.70  | hypothetical protein, conserved (pseudogene)             | -0,4934 | 1,197E-12  |

|                  |                                                         |         |            |
|------------------|---------------------------------------------------------|---------|------------|
| TcCLB.510853.30  | trans-sialidase (pseudogene), putative                  | -0,4934 | 0,001734   |
| TcCLB.509569.110 | carrier protein, putative                               | -0,4935 | 0,00001812 |
| TcCLB.511717.120 | hypothetical protein, conserved                         | -0,4937 | 0,00000629 |
| TcCLB.507357.20  | hypothetical protein                                    | -0,4938 | 0,1055     |
| TcCLB.506867.10  | endonuclease G, putative                                | -0,494  | 0,0006626  |
| TcCLB.507163.60  | hypothetical protein                                    | -0,4941 | 0,05815    |
| TcCLB.509229.70  | hypothetical protein, conserved                         | -0,4949 | 4,373E-06  |
| TcCLB.506459.299 | mucin-associated surface protein (MASP, pseudogene), pu | -0,4958 | 7,967E-08  |
| TcCLB.506055.14  | trans-sialidase (pseudogene), putative                  | -0,4959 | 0,01589    |
| TcCLB.510105.9   | ATP-dependent DEAD/H RNA helicase, putative             | -0,4961 | 0,00001391 |
| TcCLB.509247.60  | hypothetical protein, conserved (pseudogene)            | -0,4961 | 0,00005584 |
| TcCLB.505075.20  | hypothetical protein                                    | -0,4962 | 0,002315   |
| TcCLB.433733.10  | trans-sialidase, putative                               | -0,4963 | 0,001448   |
| TcCLB.508515.100 | hypothetical protein, conserved                         | -0,4964 | 0,002861   |
| TcCLB.509795.70  | hypothetical protein, conserved                         | -0,4965 | 4,736E-07  |
| TcCLB.508539.169 | trans-sialidase (pseudogene), putative                  | -0,4966 | 0,0322     |
| TcCLB.503731.9   | hypothetical protein (fragment)                         | -0,4966 | 0,03439    |
| TcCLB.503897.150 | hypothetical protein, conserved                         | -0,4967 | 0,00001199 |
| TcCLB.503465.10  | hypothetical protein, conserved                         | -0,4968 | 9,754E-07  |
| TcCLB.508723.120 | hypothetical protein, conserved                         | -0,4968 | 0,0003185  |
| TcCLB.511755.100 | hypothetical protein, conserved                         | -0,4968 | 0,02436    |
| TcCLB.510657.210 | hypothetical protein                                    | -0,4971 | 0,0009756  |
| TcCLB.504051.40  | hypothetical protein, conserved                         | -0,4973 | 4,831E-07  |
| TcCLB.510819.100 | mitochondrial carrier protein, putative                 | -0,4974 | 0,00002332 |
| TcCLB.507641.90  | hypothetical protein, conserved                         | -0,4974 | 0,0001099  |
| TcCLB.510915.21  | surface protease GP63 (pseudogene), putative            | -0,4974 | 0,01321    |
| TcCLB.510187.210 | hypothetical protein, conserved                         | -0,4977 | 6,49E-11   |
| TcCLB.506375.20  | hypothetical protein, conserved (pseudogene)            | -0,4979 | 7,802E-07  |
| TcCLB.511151.70  | hypothetical protein, conserved                         | -0,4981 | 2,079E-08  |
| TcCLB.509683.30  | hypothetical protein, conserved                         | -0,4981 | 3,325E-07  |
| TcCLB.509561.60  | hypothetical protein, conserved                         | -0,4981 | 0,0003829  |
| TcCLB.510889.160 | cell division control protein (pseudogene), putative    | -0,4982 | 6,198E-06  |
| TcCLB.503541.5   | cAMP-specific phosphodiesterase, putative               | -0,4982 | 0,08163    |
| TcCLB.503823.20  | hypothetical protein, conserved                         | -0,4983 | 0,0004443  |
| TcCLB.506135.50  | hypothetical protein, conserved                         | -0,4984 | 5,662E-06  |
| TcCLB.504033.53  | UDP-Gal or UDP-GlcNAc-dependent glycosyltransferase (γ  | -0,4984 | 0,247      |
| TcCLB.510429.10  | hypothetical protein, conserved                         | -0,4989 | 0,002073   |
| TcCLB.510519.120 | hypothetical protein, conserved                         | -0,4991 | 1,112E-06  |
| TcCLB.510533.90  | hypothetical protein, conserved                         | -0,4991 | 0,0000106  |
| TcCLB.506763.121 | elongation factor 1-gamma (EF-1-gamma, pseudogene),     | -0,4991 | 0,2449     |
| TcCLB.510099.50  | hypothetical protein, conserved                         | -0,4994 | 0,00001246 |
| TcCLB.507485.70  | hypothetical protein, conserved                         | -0,4996 | 0,00009599 |
| TcCLB.503981.90  | SWI/SNF-related matrix-associated actin-dependent regu  | -0,4998 | 0,04318    |
| TcCLB.508525.60  | hypothetical protein, conserved                         | -0,4999 | 6,56E-08   |
| TcCLB.507471.41  | trans-sialidase (pseudogene), putative                  | -0,4999 | 0,002165   |

|                  |                                                               |         |            |
|------------------|---------------------------------------------------------------|---------|------------|
| TcCLB.510283.100 | hypothetical protein, conserved                               | -0,4999 | 0,005609   |
| TcCLB.507809.90  | hypothetical protein, conserved                               | -0,5    | 1,157E-07  |
| TcCLB.510823.90  | hypothetical protein                                          | -0,5008 | 9,084E-08  |
| TcCLB.503433.10  | hypothetical protein, conserved                               | -0,5008 | 0,0005534  |
| TcCLB.506941.120 | hypothetical protein, conserved                               | -0,5009 | 0,00001189 |
| TcCLB.511455.10  | surface protease GP63 (pseudogene), putative                  | -0,501  | 0,004946   |
| TcCLB.421621.11  | hypothetical protein, conserved (pseudogene)                  | -0,501  | 0,2732     |
| TcCLB.507001.100 | transporter, putative                                         | -0,5013 | 0,001033   |
| TcCLB.510361.50  | mucin-associated surface protein (MASP, pseudogene), putative | -0,5013 | 0,02857    |
| TcCLB.457339.19  | hypothetical protein, conserved                               | -0,5018 | 0,001411   |
| TcCLB.511245.40  | hypothetical protein                                          | -0,5021 | 0,00002991 |
| TcCLB.414517.9   | hypothetical protein, conserved                               | -0,5021 | 0,002271   |
| TcCLB.508461.560 | hypothetical protein, conserved                               | -0,5023 | 9,533E-06  |
| TcCLB.504081.23  | hypothetical protein, conserved                               | -0,5026 | 0,3296     |
| TcCLB.506777.30  | hypothetical protein, conserved                               | -0,5029 | 3,115E-09  |
| TcCLB.503913.20  | actin-related protein 3, putative                             | -0,5032 | 0,00000871 |
| TcCLB.506009.60  | hypothetical protein                                          | -0,5033 | 0,0001021  |
| TcCLB.509897.190 | hypothetical protein, conserved (pseudogene)                  | -0,5036 | 8,157E-08  |
| TcCLB.508221.310 | trans-sialidase (pseudogene), putative                        | -0,5037 | 0,09158    |
| TcCLB.509399.80  | hypothetical protein, conserved                               | -0,504  | 2,237E-07  |
| TcCLB.506297.210 | hypothetical protein, conserved                               | -0,5041 | 1,052E-08  |
| TcCLB.506345.70  | retrotransposon hot spot protein (RHS, pseudogene), putative  | -0,5043 | 0,0004185  |
| TcCLB.503493.20  | hypothetical protein, conserved                               | -0,5043 | 0,0006295  |
| TcCLB.510375.20  | trans-sialidase (pseudogene), putative                        | -0,5044 | 0,1733     |
| TcCLB.511381.50  | hypothetical protein, conserved                               | -0,5048 | 8,215E-07  |
| TcCLB.507031.40  | hypothetical protein, conserved                               | -0,5048 | 9,578E-07  |
| TcCLB.505025.144 | hypothetical protein, conserved                               | -0,5051 | 0,26       |
| TcCLB.511559.20  | hypothetical protein, conserved                               | -0,5053 | 8,392E-10  |
| TcCLB.507021.60  | p1/s1 nuclease, putative                                      | -0,5054 | 3,404E-06  |
| TcCLB.507763.20  | hypothetical protein                                          | -0,5054 | 0,0007124  |
| TcCLB.503671.20  | hypothetical protein, conserved                               | -0,5055 | 0,0001285  |
| TcCLB.511215.20  | hypothetical protein                                          | -0,5056 | 1,282E-11  |
| TcCLB.503611.30  | hypothetical protein, conserved                               | -0,5056 | 1,788E-06  |
| TcCLB.503811.40  | PTS2 receptor, putative (PEX7)                                | -0,5056 | 0,0001258  |
| TcCLB.506679.110 | dynein heavy chain, putative                                  | -0,5057 | 3,317E-07  |
| TcCLB.509637.27  | hypothetical protein, conserved                               | -0,5057 | 0,0001634  |
| TcCLB.508259.11  | hypothetical protein, conserved (pseudogene)                  | -0,5058 | 0,02446    |
| TcCLB.508479.10  | protein kinase, putative                                      | -0,5058 | 0,04991    |
| TcCLB.510749.4   | ubiquitin-protein ligase, putative                            | -0,5059 | 0,2838     |
| TcCLB.511217.209 | hypothetical protein, conserved (fragment)                    | -0,506  | 0,0008153  |
| TcCLB.506783.20  | trans-sialidase (pseudogene), putative                        | -0,5061 | 0,0043     |
| TcCLB.507087.30  | cysteine peptidase, Clan CA, family C19, putative             | -0,5062 | 1,004E-08  |
| TcCLB.404975.30  | trans-sialidase (pseudogene), putative                        | -0,5063 | 0,02143    |
| TcCLB.510727.9   | hypothetical protein, conserved (fragment)                    | -0,5065 | 0,001037   |
| TcCLB.509693.70  | hypoxanthine-guanine phosphoribosyltransferase, putative      | -0,5066 | 0,0001274  |

|                  |                                                                        |         |            |
|------------------|------------------------------------------------------------------------|---------|------------|
| TcCLB.511287.60  | hypothetical protein, conserved                                        | -0,5067 | 3,368E-11  |
| TcCLB.510435.40  | GPI transamidase component Tta1, putative (TTA1)                       | -0,5067 | 0,0001414  |
| TcCLB.510667.70  | iron-sulfur cluster assembly protein, putative                         | -0,5068 | 5,128E-06  |
| TcCLB.509767.215 | vesicle transport v-SNARE 11, putative                                 | -0,5069 | 0,0004672  |
| TcCLB.509993.15  | mucin-associated surface protein (MASP, pseudogene), pi                | -0,5069 | 0,00313    |
| TcCLB.508221.350 | hypothetical protein                                                   | -0,5069 | 0,03778    |
| TcCLB.506755.40  | hypothetical protein, conserved                                        | -0,507  | 0,0002318  |
| TcCLB.510481.90  | hypothetical protein, conserved                                        | -0,507  | 0,05851    |
| TcCLB.510557.30  | hypothetical protein                                                   | -0,5073 | 0,1879     |
| TcCLB.510405.9   | hypothetical protein, conserved (fragment)                             | -0,5074 | 2,829E-08  |
| TcCLB.511245.110 | hypothetical protein, conserved                                        | -0,5077 | 4,349E-07  |
| TcCLB.511165.40  | acidocalcisomal pyrophosphatase, putative                              | -0,5078 | 4,782E-08  |
| TcCLB.510543.70  | trans-sialidase, Group II, putative                                    | -0,5079 | 0,04022    |
| TcCLB.507047.90  | hypothetical protein                                                   | -0,508  | 0,00004052 |
| TcCLB.506729.20  | hypothetical protein, conserved                                        | -0,5082 | 0,0004718  |
| TcCLB.506699.34  | ATP-dependent 6-phosphofructokinase, glycosomal (pseudogene), putative | -0,5083 | 1,087E-06  |
| TcCLB.510625.210 | trans-sialidase (pseudogene), putative                                 | -0,5083 | 0,1261     |
| TcCLB.509437.109 | trans-sialidase (pseudogene), putative                                 | -0,5085 | 0,003759   |
| TcCLB.507049.199 | pumilio protein, putative                                              | -0,5087 | 0,0318     |
| TcCLB.508009.10  | surface protease GP63 (pseudogene), putative                           | -0,5087 | 0,03273    |
| TcCLB.503913.4   | nucleolar RNA binding protein (pseudogene), putative                   | -0,5091 | 0,000135   |
| TcCLB.506573.91  | coatomer delta subunit, putative                                       | -0,5094 | 0,07095    |
| TcCLB.509943.20  | cAMP specific phosphodiesterase, putative                              | -0,5098 | 0,000506   |
| TcCLB.508347.140 | hypothetical protein, conserved                                        | -0,5099 | 2,365E-06  |
| TcCLB.509373.30  | mucin-associated surface protein (MASP, pseudogene), pi                | -0,5099 | 0,04152    |
| TcCLB.511173.89  | mucin TcMUCII (pseudogene), putative                                   | -0,51   | 0,009962   |
| TcCLB.503785.20  | hypothetical protein, conserved                                        | -0,5101 | 0,0001178  |
| TcCLB.508723.80  | disgorgin, putative                                                    | -0,5102 | 0,00005292 |
| TcCLB.508163.170 | trans-sialidase (pseudogene), putative                                 | -0,5104 | 0,1213     |
| TcCLB.511211.235 | hypothetical protein, conserved                                        | -0,5105 | 0,0002331  |
| TcCLB.510713.101 | surface protease GP63 (pseudogene), putative                           | -0,5105 | 0,2204     |
| TcCLB.504081.295 | surface protease GP63 (pseudogene), putative                           | -0,5107 | 0,1608     |
| TcCLB.506579.119 | hypothetical protein, conserved                                        | -0,511  | 0,004026   |
| TcCLB.506133.30  | surface protease GP63 (pseudogene), putative                           | -0,511  | 0,2331     |
| TcCLB.508523.21  | trans-sialidase (pseudogene), putative                                 | -0,5112 | 0,001491   |
| TcCLB.510575.210 | hypothetical protein, conserved                                        | -0,5113 | 1,752E-06  |
| TcCLB.510483.290 | hypothetical protein                                                   | -0,5113 | 0,1386     |
| TcCLB.504105.40  | hypothetical protein, conserved                                        | -0,5115 | 6,297E-09  |
| TcCLB.506649.40  | rho-like GTP binding protein, putative                                 | -0,5115 | 0,00004406 |
| TcCLB.511143.6   | protein kinase, putative (fragment)                                    | -0,5116 | 0,01191    |
| TcCLB.506317.20  | hypothetical protein, conserved                                        | -0,5118 | 3,123E-09  |
| TcCLB.507963.40  | hypothetical protein, conserved                                        | -0,5118 | 0,00007012 |
| TcCLB.507709.100 | protein phosphatase 2A regulatory subunit, putative                    | -0,5122 | 0,00002402 |
| TcCLB.510007.40  | hypothetical protein, conserved                                        | -0,5125 | 0,00001701 |
| TcCLB.506135.100 | hypothetical protein, conserved                                        | -0,5125 | 0,0007426  |



|                  |                                                          |         |            |
|------------------|----------------------------------------------------------|---------|------------|
| TcCLB.509015.10  | copper-transporting ATPase, putative                     | -0,5125 | 0,02651    |
| TcCLB.509099.150 | cdc2-related kinase 9 (CRK9)                             | -0,5126 | 3,02E-07   |
| TcCLB.507993.180 | hypothetical protein, conserved                          | -0,5127 | 3,02E-07   |
| TcCLB.506439.18  | hypothetical protein, conserved                          | -0,5127 | 4,744E-06  |
| TcCLB.504029.40  | COPII coat assembly protein sec16, putative (sec16)      | -0,5128 | 0,00001956 |
| TcCLB.510351.70  | hypothetical protein, conserved                          | -0,5128 | 0,0001314  |
| TcCLB.510757.9   | hypothetical protein, conserved (fragment)               | -0,5131 | 2,137E-06  |
| TcCLB.510263.30  | surface protease GP63, putative                          | -0,5132 | 0,0007307  |
| TcCLB.511529.170 | enoyl-CoA hydratase/isomerase family protein, putative   | -0,5132 | 0,002676   |
| TcCLB.503753.20  | hypothetical protein, conserved                          | -0,5134 | 0,0001587  |
| TcCLB.506941.229 | pre-mRNA cleavage complex II Clp1 protein, putative      | -0,5138 | 4,496E-07  |
| TcCLB.506697.30  | serine/threonine-protein kinase Nek, putative            | -0,5139 | 4,313E-07  |
| TcCLB.506265.60  | hypothetical protein, conserved                          | -0,514  | 2,486E-10  |
| TcCLB.506661.120 | hypothetical protein                                     | -0,514  | 0,00002202 |
| TcCLB.473313.10  | mucin-associated surface protein (MASP), putative (fragm | -0,5141 | 0,008304   |
| TcCLB.506451.16  | hypothetical protein, conserved (pseudogene)             | -0,5141 | 0,08033    |
| TcCLB.504125.30  | ubiquitin carboxyl-terminal hydrolase, putative          | -0,5143 | 4,47E-10   |
| TcCLB.511445.30  | hypothetical protein, conserved                          | -0,5143 | 2,741E-07  |
| TcCLB.506977.110 | hypothetical protein, conserved (pseudogene)             | -0,5143 | 2,954E-06  |
| TcCLB.506503.40  | hypothetical protein, conserved                          | -0,5143 | 0,00008669 |
| TcCLB.511873.41  | hypothetical protein, conserved (pseudogene)             | -0,5148 | 0,08769    |
| TcCLB.504125.64  | hypothetical protein                                     | -0,5149 | 4,087E-08  |
| TcCLB.511491.80  | mitogen-activated protein kinase, putative               | -0,5149 | 6,385E-07  |
| TcCLB.506305.20  | hypothetical protein, conserved                          | -0,5149 | 2,665E-06  |
| TcCLB.509599.180 | hypothetical protein, conserved                          | -0,5152 | 0,00002144 |
| TcCLB.504161.30  | hypothetical protein, conserved                          | -0,5152 | 0,00006765 |
| TcCLB.439803.9   | trans-sialidase (pseudogene), putative                   | -0,5152 | 0,002272   |
| TcCLB.506835.99  | hypothetical protein, conserved                          | -0,5153 | 8,651E-13  |
| TcCLB.508261.150 | trans-sialidase (pseudogene), putative                   | -0,5153 | 0,01967    |
| TcCLB.510709.50  | mucin TcMUCII (pseudogene), putative                     | -0,5154 | 0,4069     |
| TcCLB.511407.50  | hypothetical protein, conserved                          | -0,5157 | 4,724E-08  |
| TcCLB.507927.10  | hypothetical protein, conserved                          | -0,5157 | 0,0001893  |
| TcCLB.511797.167 | mucin-associated surface protein (MASP), putative        | -0,5157 | 0,1182     |
| TcCLB.503529.10  | hypothetical protein, conserved (fragment)               | -0,516  | 0,1746     |
| TcCLB.511277.610 | surface protease GP63, putative                          | -0,5161 | 0,0001879  |
| TcCLB.505071.60  | protein kinase, putative                                 | -0,5162 | 2,198E-09  |
| TcCLB.508495.130 | hypothetical protein                                     | -0,5164 | 0,1432     |
| TcCLB.509901.130 | Iron-sulfur assembly protein 1, putative (Isa1)          | -0,5165 | 1,529E-06  |
| TcCLB.510445.30  | hypothetical protein, conserved                          | -0,5166 | 1,181E-06  |
| TcCLB.508277.260 | actin-related protein 3, putative                        | -0,5167 | 1,743E-08  |
| TcCLB.508887.10  | hypothetical protein, conserved (pseudogene)             | -0,5167 | 0,1995     |
| TcCLB.510043.29  | hypothetical protein, conserved                          | -0,5168 | 0,002346   |
| TcCLB.509229.30  | hypothetical protein, conserved                          | -0,5169 | 0,004722   |
| TcCLB.504039.50  | retrotransposon hot spot protein (RHS, pseudogene), puta | -0,5169 | 0,007044   |
| TcCLB.503713.40  | hypothetical protein                                     | -0,517  | 0,01496    |

|                  |                                                         |         |            |
|------------------|---------------------------------------------------------|---------|------------|
| TcCLB.504081.470 | mucin TcMUCII, putative                                 | -0,517  | 0,22       |
| TcCLB.506943.69  | hypothetical protein, conserved                         | -0,5171 | 2,289E-06  |
| TcCLB.511277.614 | hypothetical protein                                    | -0,5171 | 0,02582    |
| TcCLB.511255.370 | mucin TcMUCII, putative                                 | -0,5171 | 0,1579     |
| TcCLB.506559.205 | hypothetical protein                                    | -0,5173 | 0,0001163  |
| TcCLB.510361.10  | trans-sialidase, Group V, putative                      | -0,5174 | 0,0637     |
| TcCLB.508593.120 | hypothetical protein, conserved                         | -0,5175 | 0,0001117  |
| TcCLB.509073.10  | hypothetical protein, conserved                         | -0,5176 | 4,157E-07  |
| TcCLB.511167.10  | NADH-cytochrome b5 reductase, putative                  | -0,5176 | 0,0000633  |
| TcCLB.506941.30  | hypothetical protein, conserved                         | -0,5178 | 2,031E-10  |
| TcCLB.507937.6   | trans-sialidase (pseudogene), putative                  | -0,518  | 0,2335     |
| TcCLB.508811.55  | hypothetical protein                                    | -0,5189 | 2,152E-10  |
| TcCLB.509399.130 | hypothetical protein, conserved                         | -0,5189 | 5,619E-06  |
| TcCLB.503989.50  | hypothetical protein, conserved                         | -0,5191 | 8,345E-10  |
| TcCLB.507739.110 | myosin IB heavy chain, putative                         | -0,5193 | 7,318E-12  |
| TcCLB.503525.30  | hypothetical protein, conserved                         | -0,5194 | 1,077E-08  |
| TcCLB.506709.40  | hypothetical protein, conserved                         | -0,5194 | 0,0001144  |
| TcCLB.503753.10  | hypothetical protein, conserved                         | -0,5195 | 0,00006213 |
| TcCLB.504057.130 | hypothetical protein, conserved                         | -0,5197 | 1,085E-10  |
| TcCLB.507711.70  | hypothetical protein, conserved                         | -0,5199 | 0,00005239 |
| TcCLB.503867.20  | trans-sialidase (pseudogene), putative                  | -0,52   | 0,04138    |
| TcCLB.506513.40  | hypothetical protein, conserved                         | -0,5202 | 0,00003226 |
| TcCLB.510359.430 | trans-sialidase (pseudogene), putative                  | -0,5203 | 2,69E-07   |
| TcCLB.504199.20  | hypothetical protein, conserved                         | -0,5203 | 2,544E-06  |
| TcCLB.507743.9   | tyrosine protein kinase, putative                       | -0,5204 | 1,894E-06  |
| TcCLB.511345.30  | trans-sialidase (pseudogene), putative                  | -0,5206 | 0,0008825  |
| TcCLB.511285.120 | ATP-dependent RNA helicase, putative                    | -0,5209 | 0,00006364 |
| TcCLB.508261.166 | hypothetical protein, conserved (pseudogene)            | -0,5209 | 0,02621    |
| TcCLB.511449.95  | hypothetical protein, conserved (pseudogene)            | -0,5211 | 0,2932     |
| TcCLB.507623.50  | oxidoreductase, putative                                | -0,5212 | 0,00002078 |
| TcCLB.511751.240 | hypothetical protein, conserved (pseudogene)            | -0,5217 | 6,494E-07  |
| TcCLB.507023.190 | DNA-J protein, putative                                 | -0,5217 | 0,0001121  |
| TcCLB.508307.100 | hypothetical protein, conserved                         | -0,5218 | 0,000873   |
| TcCLB.511451.100 | trans-sialidase (pseudogene), putative                  | -0,5218 | 0,01571    |
| TcCLB.508153.520 | hypothetical protein, conserved (pseudogene)            | -0,522  | 2,697E-09  |
| TcCLB.505919.11  | mucin-associated surface protein (MASP, pseudogene), pi | -0,522  | 1,51E-07   |
| TcCLB.506743.130 | protein tyrosine phosphatase-like protein, putative     | -0,5222 | 0,01234    |
| TcCLB.506357.80  | hypothetical protein, conserved                         | -0,5223 | 1,36E-09   |
| TcCLB.511153.90  | phopshatase, putative                                   | -0,5224 | 1,756E-07  |
| TcCLB.472777.30  | protein disulfide isomerase, putative                   | -0,5225 | 0,0009307  |
| TcCLB.510887.70  | hypothetical protein, conserved                         | -0,5226 | 3,682E-06  |
| TcCLB.504057.120 | lipophosphoglycan biosynthetic protein 2, putative      | -0,5228 | 0,0000529  |
| TcCLB.508939.60  | hypothetical protein                                    | -0,5229 | 0,0008393  |
| TcCLB.510161.20  | hypothetical protein, conserved                         | -0,5231 | 4,004E-11  |
| TcCLB.510625.225 | hypothetical protein, conserved (pseudogene)            | -0,5232 | 0,05578    |

|                  |                                                          |         |            |
|------------------|----------------------------------------------------------|---------|------------|
| TcCLB.507801.130 | heat shock protein DnaJ (pseudogene), putative           | -0,5236 | 4,324E-13  |
| TcCLB.510667.40  | DNA repair protein RAD2, putative                        | -0,5236 | 7,057E-07  |
| TcCLB.510901.110 | hypothetical protein, conserved                          | -0,5236 | 0,0002736  |
| TcCLB.510031.70  | heat shock protein Hsp20, putative                       | -0,5237 | 0,0001259  |
| TcCLB.508221.329 | mucin-associated surface protein (MASP, pseudogene), pu  | -0,5238 | 0,3785     |
| TcCLB.509897.95  | hypothetical protein, conserved (pseudogene)             | -0,5239 | 0,00002696 |
| TcCLB.503453.60  | GTP-ase activating protein, putative                     | -0,5239 | 0,00008751 |
| TcCLB.509879.30  | hypothetical protein, conserved                          | -0,5242 | 0,00000575 |
| TcCLB.506931.30  | hypothetical protein, conserved                          | -0,5244 | 0,002791   |
| TcCLB.506681.60  | hypothetical protein, conserved                          | -0,5246 | 3,354E-08  |
| TcCLB.507831.40  | hypothetical protein, conserved                          | -0,5246 | 8,858E-06  |
| TcCLB.511555.40  | CPSF 30 kDa subunit, putative (CPSF30)                   | -0,5248 | 6,956E-07  |
| TcCLB.510657.170 | cytochrome P450 reductase, putative                      | -0,5248 | 0,000438   |
| TcCLB.505171.70  | ATP-dependent DEAD/H RNA helicase, putative              | -0,5249 | 3,162E-09  |
| TcCLB.506945.105 | zinc-binding protein (Yippee), putative                  | -0,5249 | 0,0001599  |
| TcCLB.411383.10  | surface protease GP63 (pseudogene), putative             | -0,5249 | 0,2803     |
| TcCLB.509233.70  | Spastin, putative                                        | -0,525  | 1,971E-09  |
| TcCLB.510171.10  | trans-sialidase, putative (fragment)                     | -0,5252 | 0,0001199  |
| TcCLB.511173.250 | mucin-associated surface protein (MASP, pseudogene), pu  | -0,5253 | 0,01766    |
| TcCLB.508665.30  | hypothetical protein, conserved                          | -0,5257 | 9,81E-08   |
| TcCLB.508547.100 | hypothetical protein, conserved                          | -0,5257 | 3,415E-06  |
| TcCLB.511025.100 | chaperone DNAJ protein, putative                         | -0,5261 | 5,943E-08  |
| TcCLB.510885.90  | hypothetical protein, conserved                          | -0,5263 | 0,001014   |
| TcCLB.426761.10  | retrotransposon hot spot protein (RHS, pseudogene), puta | -0,5266 | 0,1825     |
| TcCLB.503559.90  | hypothetical protein, conserved                          | -0,5267 | 6,476E-07  |
| TcCLB.510787.10  | trans-sialidase, Group I, putative                       | -0,527  | 0,0000663  |
| TcCLB.506525.70  | hypothetical protein, conserved                          | -0,5274 | 1,014E-09  |
| TcCLB.510655.140 | hypothetical protein, conserved                          | -0,5274 | 0,00001996 |
| TcCLB.511179.160 | ubiquitin-protein ligase, putative                       | -0,5275 | 0,0004896  |
| TcCLB.508423.20  | hypothetical protein, conserved (pseudogene)             | -0,5276 | 4,499E-10  |
| TcCLB.509099.20  | hypothetical protein, conserved                          | -0,5276 | 1,875E-08  |
| TcCLB.506517.14  | protein kinase, putative                                 | -0,5276 | 0,01103    |
| TcCLB.510533.230 | palmitoyl acyltransferase 11, putative                   | -0,528  | 0,00001669 |
| TcCLB.507809.100 | hypothetical protein, conserved                          | -0,5282 | 1,035E-12  |
| TcCLB.510491.70  | hypothetical protein                                     | -0,5282 | 0,0007742  |
| TcCLB.504213.70  | hypothetical protein, conserved                          | -0,5283 | 2,042E-07  |
| TcCLB.509991.40  | transmembrane protein, conserved (pseudogene)            | -0,5287 | 1,542E-13  |
| TcCLB.507317.60  | protein kinase-like protein, putative                    | -0,5287 | 0,0003099  |
| TcCLB.506753.220 | hypothetical protein, conserved                          | -0,5288 | 0,005955   |
| TcCLB.504149.124 | conserved protein, unknown function                      | -0,5289 | 5,798E-09  |
| TcCLB.507611.210 | hypothetical protein                                     | -0,529  | 0,1729     |
| TcCLB.505193.20  | hypothetical protein, conserved                          | -0,5291 | 4,832E-06  |
| TcCLB.506577.5   | hypothetical protein                                     | -0,5292 | 5,098E-06  |
| TcCLB.507927.70  | hypothetical protein, conserved                          | -0,5292 | 0,0001789  |
| TcCLB.507037.89  | hypothetical protein, conserved                          | -0,5293 | 0,002957   |

|                  |                                                         |         |            |
|------------------|---------------------------------------------------------|---------|------------|
| TcCLB.511731.5   | cationic amino acid transporter (pseudogene), putative  | -0,5293 | 0,02645    |
| TcCLB.510489.44  | mucin TcMUCII (pseudogene), putative                    | -0,5293 | 0,09193    |
| TcCLB.506177.150 | hypothetical protein, conserved                         | -0,5295 | 3,764E-08  |
| TcCLB.509617.60  | thioredoxin, putative                                   | -0,5296 | 0,0001275  |
| TcCLB.506457.149 | hypothetical protein, conserved (fragment)              | -0,5296 | 0,0003832  |
| TcCLB.511285.50  | hypothetical protein, conserved                         | -0,5297 | 8,002E-12  |
| TcCLB.506681.30  | hypothetical protein, conserved                         | -0,5299 | 0,00008429 |
| TcCLB.506289.80  | small GTP-binding protein Rab32, putative               | -0,53   | 2,867E-07  |
| TcCLB.506559.454 | GTP-binding protein, putative                           | -0,53   | 4,455E-07  |
| TcCLB.509217.60  | trans-sialidase (pseudogene), putative                  | -0,5301 | 0,04333    |
| TcCLB.407477.60  | hypothetical protein, conserved                         | -0,5302 | 0,00001233 |
| TcCLB.503841.50  | hypothetical protein, conserved                         | -0,5302 | 0,0000448  |
| TcCLB.506173.100 | mucin-associated surface protein (MASP, pseudogene), pu | -0,5302 | 0,04488    |
| TcCLB.503761.50  | hypothetical protein                                    | -0,5303 | 0,07941    |
| TcCLB.509975.15  | surface protease GP63 (pseudogene), putative            | -0,5304 | 0,1178     |
| TcCLB.507907.20  | trans-sialidase, Group II, putative                     | -0,5308 | 0,002374   |
| TcCLB.508207.45  | hypothetical protein, conserved                         | -0,5309 | 1,631E-06  |
| TcCLB.508355.280 | hypothetical protein, conserved                         | -0,5312 | 3,082E-09  |
| TcCLB.510861.70  | hypothetical protein, conserved                         | -0,5312 | 2,512E-07  |
| TcCLB.508277.269 | hypothetical protein, conserved (pseudogene)            | -0,5313 | 4,693E-06  |
| TcCLB.399373.20  | dispersed gene family protein 1 (DGF-1), putative       | -0,5316 | 0,02248    |
| TcCLB.506279.100 | hypothetical protein                                    | -0,5317 | 0,003423   |
| TcCLB.504071.20  | hypothetical protein, conserved                         | -0,5319 | 4,656E-08  |
| TcCLB.506435.90  | hypothetical protein, conserved                         | -0,5319 | 1,571E-06  |
| TcCLB.507089.220 | hypothetical protein, conserved                         | -0,532  | 2,018E-06  |
| TcCLB.506509.40  | hypothetical protein, conserved                         | -0,5322 | 0,00009773 |
| TcCLB.504153.360 | succinyl-coA:3-ketoacid-coenzyme A transferase, mitocho | -0,5327 | 5,489E-14  |
| TcCLB.509963.60  | hypothetical protein, conserved                         | -0,5329 | 0,0002839  |
| TcCLB.510289.70  | hypothetical protein, conserved                         | -0,5332 | 0,00004484 |
| TcCLB.503971.50  | hypothetical protein, conserved                         | -0,5334 | 0,007129   |
| TcCLB.503457.10  | hypothetical protein                                    | -0,5336 | 0,0003186  |
| TcCLB.511255.640 | mucin TcMUCII, putative                                 | -0,5336 | 0,1044     |
| TcCLB.509999.120 | RNA-binding protein, putative                           | -0,5339 | 0,0138     |
| TcCLB.511875.123 | hypothetical protein, conserved (pseudogene)            | -0,5339 | 0,2313     |
| TcCLB.508355.380 | cysteine peptidase, Clan CA, family C19, putative       | -0,534  | 0,002382   |
| TcCLB.508207.130 | hypothetical protein, conserved                         | -0,5342 | 0,0003775  |
| TcCLB.510175.90  | retrotransposon hot spot (RHS) protein, putative        | -0,5346 | 0,0001033  |
| TcCLB.503555.50  | hypothetical protein, conserved                         | -0,5346 | 0,0004553  |
| TcCLB.507625.186 | hypothetical protein, conserved                         | -0,5348 | 0,0004506  |
| TcCLB.509979.261 | surface protease GP63 (pseudogene), putative            | -0,5349 | 0,01127    |
| TcCLB.503789.20  | hypothetical protein, conserved                         | -0,535  | 1,934E-09  |
| TcCLB.510267.10  | hypothetical protein, conserved                         | -0,535  | 7,818E-06  |
| TcCLB.503611.50  | hypothetical protein, conserved                         | -0,535  | 0,0003467  |
| TcCLB.511215.60  | hypothetical protein, conserved                         | -0,5351 | 0,000082   |
| TcCLB.508707.194 | hypothetical protein, conserved                         | -0,5353 | 1,838E-09  |

|                  |                                                              |         |            |
|------------------|--------------------------------------------------------------|---------|------------|
| TcCLB.510693.310 | syntaxin binding protein (pseudogene), putative              | -0,5353 | 0,1126     |
| TcCLB.511727.234 | hypothetical protein, conserved                              | -0,5355 | 9,123E-07  |
| TcCLB.508221.120 | hypothetical protein                                         | -0,5355 | 0,07648    |
| TcCLB.416605.10  | mucin-associated surface protein (MASP), putative            | -0,5358 | 0,08166    |
| TcCLB.504089.30  | hypothetical protein, conserved                              | -0,5359 | 2,783E-09  |
| TcCLB.508461.284 | mitochondrial carrier protein, putative                      | -0,5359 | 4,325E-06  |
| TcCLB.508357.40  | cysteine peptidase, Clan CA, family C19, putative            | -0,5361 | 0,0002224  |
| TcCLB.511157.9   | neurobeachin/beige protein, putative (fragment)              | -0,5365 | 1,664E-08  |
| TcCLB.510495.11  | surface protease GP63 (pseudogene), putative                 | -0,5365 | 0,02329    |
| TcCLB.507949.10  | chaperone DNAJ protein, putative                             | -0,5367 | 0,0001284  |
| TcCLB.510351.50  | hypothetical protein, conserved                              | -0,5376 | 2,283E-08  |
| TcCLB.509615.60  | hypothetical protein                                         | -0,5377 | 0,1844     |
| TcCLB.490165.9   | DNA repair protein, putative                                 | -0,5378 | 0,01535    |
| TcCLB.511239.130 | hypothetical protein, conserved                              | -0,5379 | 0,0005912  |
| TcCLB.510189.60  | trans-sialidase (pseudogene), putative                       | -0,538  | 0,03312    |
| TcCLB.503619.10  | meiotic recombination protein SPO11, putative                | -0,5381 | 0,0006739  |
| TcCLB.507467.40  | choline/carnitine O-acetyltransferase (pseudogene), putative | -0,5383 | 0,002197   |
| TcCLB.504587.40  | mucin TcMUCII, putative                                      | -0,5383 | 0,06748    |
| TcCLB.509993.5   | hypothetical protein, conserved (pseudogene)                 | -0,5386 | 0,0003053  |
| TcCLB.504131.120 | hypothetical protein, conserved                              | -0,5387 | 9,59E-07   |
| TcCLB.511753.90  | hypothetical protein, conserved                              | -0,5387 | 0,00006234 |
| TcCLB.508959.10  | hypothetical protein, conserved                              | -0,5388 | 0,005231   |
| TcCLB.505931.20  | surface protease GP63, putative                              | -0,539  | 0,007183   |
| TcCLB.508211.10  | oxysterol-binding protein, putative                          | -0,5391 | 0,00002249 |
| TcCLB.506767.280 | retrotransposon hot spot protein (RHS, pseudogene), putative | -0,5391 | 0,1882     |
| TcCLB.503571.19  | hypothetical protein, conserved                              | -0,5393 | 3,546E-08  |
| TcCLB.506471.40  | beta galactofuranosyl glycosyltransferase, putative          | -0,5394 | 0,02044    |
| TcCLB.507483.80  | hypothetical protein, conserved                              | -0,5397 | 2,493E-06  |
| TcCLB.507011.140 | DNA-repair protein, putative                                 | -0,5399 | 3,02E-08   |
| TcCLB.506837.10  | mucin TcMUCI, putative                                       | -0,5399 | 0,0002384  |
| TcCLB.510225.40  | hypothetical protein, conserved                              | -0,5403 | 1,342E-08  |
| TcCLB.506253.21  | hypothetical protein, conserved                              | -0,5403 | 0,1461     |
| TcCLB.506625.130 | hypothetical protein, conserved                              | -0,5406 | 0,004629   |
| TcCLB.506297.110 | ATPase, putative                                             | -0,541  | 6,191E-13  |
| TcCLB.506113.90  | retrotransposon hot spot protein (RHS, pseudogene), putative | -0,541  | 2,104E-07  |
| TcCLB.507837.80  | TBC1 domain family member 20/GTPase, putative                | -0,5413 | 0,00008337 |
| TcCLB.509429.124 | hypothetical protein, conserved                              | -0,5413 | 0,001047   |
| TcCLB.508895.60  | RNA-binding protein, putative                                | -0,5414 | 2,718E-07  |
| TcCLB.507041.85  | hypothetical protein, conserved (pseudogene)                 | -0,5414 | 0,0002034  |
| TcCLB.511621.20  | hypothetical protein, conserved                              | -0,5416 | 2,519E-06  |
| TcCLB.506619.30  | Flagellar Member 8 (FLAM8)                                   | -0,5418 | 0,1499     |
| TcCLB.510823.100 | hypothetical protein, conserved                              | -0,542  | 1,096E-07  |
| TcCLB.508777.80  | hypothetical protein, conserved                              | -0,542  | 4,197E-07  |
| TcCLB.511603.160 | mucin-associated surface protein (MASP), putative            | -0,5423 | 0,06508    |
| TcCLB.508979.40  | hypothetical protein                                         | -0,5424 | 0,2315     |

|                  |                                                             |         |            |
|------------------|-------------------------------------------------------------|---------|------------|
| TcCLB.505999.150 | wd40 repeat domain-containing protein                       | -0,5427 | 9,413E-07  |
| TcCLB.507681.220 | pre-mRNA splicing factor ATP-dependent RNA helicase, p      | -0,543  | 1,388E-10  |
| TcCLB.508835.30  | trans-sialidase (pseudogene), putative                      | -0,5431 | 0,001075   |
| TcCLB.511421.160 | hypothetical protein, conserved                             | -0,5435 | 0,00006973 |
| TcCLB.506955.161 | elongation factor 1-gamma (EF-1-gamma, pseudogene),         | -0,5436 | 0,0542     |
| TcCLB.509683.50  | calmodulin, putative                                        | -0,5437 | 0,0003302  |
| TcCLB.508181.4   | AGC/RSK family serine/threonine kinase, putative (fragm     | -0,544  | 0,03587    |
| TcCLB.508779.20  | hypothetical protein, conserved                             | -0,5442 | 2,536E-08  |
| TcCLB.509543.10  | hypothetical protein                                        | -0,5443 | 0,01942    |
| TcCLB.508859.70  | hypothetical protein, conserved                             | -0,5445 | 6,872E-06  |
| TcCLB.509007.60  | rac serine-threonine kinase, putative                       | -0,5448 | 1,268E-07  |
| TcCLB.508815.40  | hypothetical protein, conserved                             | -0,545  | 0,00005094 |
| TcCLB.508277.340 | Eukaryotic translation initiation factor 4 gamma type 2, pi | -0,5453 | 4,129E-12  |
| TcCLB.511847.20  | hypothetical protein, conserved                             | -0,5454 | 1,884E-07  |
| TcCLB.511371.5   | trans-sialidase (pseudogene), putative                      | -0,5455 | 0,001859   |
| TcCLB.506955.79  | surface protease GP63 (pseudogene), putative                | -0,5456 | 0,1407     |
| TcCLB.511389.70  | hypothetical protein, conserved                             | -0,5457 | 2,933E-08  |
| TcCLB.506247.430 | hypothetical protein, conserved                             | -0,5458 | 6,022E-07  |
| TcCLB.509399.170 | elongation factor 1-gamma (EF-1-gamma), putative            | -0,5459 | 2,588E-06  |
| TcCLB.507775.30  | hypothetical protein, conserved                             | -0,5459 | 0,00001348 |
| TcCLB.510725.60  | hypothetical protein, conserved                             | -0,5462 | 0,0009931  |
| TcCLB.509249.20  | trans-sialidase (pseudogene), putative                      | -0,5462 | 0,00152    |
| TcCLB.508153.200 | kinesin, putative                                           | -0,5464 | 8,298E-08  |
| TcCLB.511071.70  | ubiquitin-conjugating enzyme E2, putative                   | -0,5464 | 2,993E-07  |
| TcCLB.506015.40  | mucin TcMUC1, putative                                      | -0,5465 | 0,05123    |
| TcCLB.511237.70  | hypothetical protein, conserved                             | -0,5467 | 0,00000894 |
| TcCLB.508765.50  | mucin TcMUC1 (pseudogene), putative                         | -0,5467 | 0,00264    |
| TcCLB.420293.20  | trans-sialidase, Group II, putative                         | -0,5467 | 0,007266   |
| TcCLB.507771.110 | hypothetical protein, conserved                             | -0,5472 | 0,00000117 |
| TcCLB.510753.30  | hypothetical protein, conserved                             | -0,5472 | 6,191E-06  |
| TcCLB.508667.9   | hypothetical protein, conserved                             | -0,5472 | 0,01227    |
| TcCLB.511603.130 | hypothetical protein, conserved                             | -0,5472 | 0,209      |
| TcCLB.506729.40  | hypothetical protein, conserved                             | -0,5476 | 6,889E-07  |
| TcCLB.511229.39  | hypothetical protein, conserved                             | -0,548  | 0,0006515  |
| TcCLB.510885.140 | hypothetical protein                                        | -0,5482 | 4,955E-06  |
| TcCLB.507809.14  | protein kinase, putative                                    | -0,5482 | 6,856E-06  |
| TcCLB.504669.50  | mucin TcMUC1, putative                                      | -0,5482 | 0,0225     |
| TcCLB.511727.30  | hypothetical protein, conserved                             | -0,5486 | 9,889E-10  |
| TcCLB.507649.5   | hypothetical protein, conserved                             | -0,5486 | 0,0323     |
| TcCLB.504013.20  | hypothetical protein                                        | -0,5487 | 0,00006131 |
| TcCLB.507765.90  | hypothetical protein, conserved                             | -0,5489 | 1,566E-08  |
| TcCLB.507073.30  | hypothetical protein, conserved                             | -0,549  | 2,454E-12  |
| TcCLB.506355.70  | hypothetical protein, conserved                             | -0,5493 | 6,28E-11   |
| TcCLB.507277.30  | hypothetical protein, conserved                             | -0,5495 | 2,293E-06  |
| TcCLB.508707.290 | hypothetical protein                                        | -0,5495 | 0,0001196  |

|                  |                                                             |         |            |
|------------------|-------------------------------------------------------------|---------|------------|
| TcCLB.505943.95  | trans-sialidase (pseudogene), putative                      | -0,5496 | 0,00009662 |
| TcCLB.506435.470 | hypothetical protein, conserved                             | -0,5496 | 0,001014   |
| TcCLB.503887.70  | phosphoglycerate mutase, putative (iPGAM)                   | -0,5497 | 0,0007742  |
| TcCLB.506413.40  | hypothetical protein, conserved                             | -0,5498 | 0,0002847  |
| TcCLB.507993.280 | hypothetical protein, conserved                             | -0,5499 | 2,883E-11  |
| TcCLB.509267.90  | ATP-dependent RNA helicase, putative                        | -0,5507 | 0,00002377 |
| TcCLB.508665.40  | hypothetical protein, conserved                             | -0,5507 | 0,000732   |
| TcCLB.508167.10  | mucin-associated surface protein (MASP, pseudogene), pu     | -0,5509 | 0,01287    |
| TcCLB.510359.450 | hypothetical protein                                        | -0,5509 | 0,1234     |
| TcCLB.508799.100 | hypothetical protein, conserved                             | -0,551  | 5,971E-07  |
| TcCLB.506265.160 | hypothetical protein, conserved                             | -0,5512 | 0,0001764  |
| TcCLB.509881.9   | dispersed gene family protein 1 (DGF-1), putative (fragme   | -0,5512 | 0,3228     |
| TcCLB.511079.25  | mucin-associated surface protein (MASP, pseudogene), pu     | -0,5513 | 0,1018     |
| TcCLB.506445.20  | Eukaryotic translation initiation factor 4 gamma type 2, pu | -0,5517 | 9,193E-10  |
| TcCLB.508879.130 | telomerase component (pseudogene), putative                 | -0,5526 | 5,014E-18  |
| TcCLB.510283.150 | hypothetical protein, conserved                             | -0,5526 | 0,00133    |
| TcCLB.507949.190 | trans-sialidase (pseudogene), putative                      | -0,5528 | 0,00005027 |
| TcCLB.506315.30  | protein phosphatase 1 catalitic subunit, putative           | -0,5529 | 2,586E-07  |
| TcCLB.506941.70  | hypothetical protein, conserved                             | -0,5531 | 9,385E-10  |
| TcCLB.509039.49  | hypothetical protein, conserved                             | -0,5533 | 0,00258    |
| TcCLB.507071.89  | mucin TcMUCII (pseudogene), putative                        | -0,5534 | 0,09269    |
| TcCLB.504021.130 | hypothetical protein, conserved                             | -0,5537 | 0,00002796 |
| TcCLB.510897.3   | A/G-specific adenine glycosylase (pseudogene), putative     | -0,5538 | 0,03376    |
| TcCLB.510483.270 | hypothetical protein                                        | -0,5538 | 0,1206     |
| TcCLB.508933.20  | dihydrolipoamide dehydrogenase, putative                    | -0,554  | 9,549E-06  |
| TcCLB.509419.140 | mucin-associated surface protein (MASP), putative           | -0,554  | 0,03231    |
| TcCLB.508465.60  | hypothetical protein, conserved                             | -0,5543 | 4,259E-08  |
| TcCLB.506289.20  | hypothetical protein, conserved                             | -0,5544 | 9,268E-07  |
| TcCLB.509429.70  | hypothetical protein                                        | -0,5545 | 8,338E-09  |
| TcCLB.506955.50  | trans-sialidase (pseudogene), putative                      | -0,5545 | 0,003484   |
| TcCLB.506519.120 | hypothetical protein, conserved                             | -0,5546 | 7,262E-07  |
| TcCLB.508521.90  | trans-sialidase (pseudogene), putative                      | -0,5547 | 0,0003289  |
| TcCLB.507077.30  | hypothetical protein, conserved                             | -0,5547 | 0,0008629  |
| TcCLB.504085.40  | hypothetical protein, conserved                             | -0,5549 | 2,037E-06  |
| TcCLB.506811.40  | hypothetical protein, conserved                             | -0,5551 | 2,288E-08  |
| TcCLB.507019.10  | protein kinase, putative                                    | -0,5553 | 3,506E-07  |
| TcCLB.506445.121 | heat shock protein DNAJ, putative (fragment)                | -0,5557 | 0,001778   |
| TcCLB.509571.30  | hypothetical protein, conserved                             | -0,5556 | 9,798E-11  |
| TcCLB.506949.30  | hypothetical protein, conserved                             | -0,5561 | 0,02356    |
| TcCLB.510513.40  | hypothetical protein, conserved                             | -0,5564 | 9,348E-06  |
| TcCLB.510713.120 | surface protease GP63, putative                             | -0,5564 | 0,1775     |
| TcCLB.503489.20  | hypothetical protein, conserved                             | -0,5565 | 9,313E-06  |
| TcCLB.508431.80  | trans-sialidase (pseudogene), putative                      | -0,5565 | 0,01422    |
| TcCLB.503735.49  | hypothetical protein, conserved                             | -0,5567 | 0,0003489  |
| TcCLB.508233.30  | mucin TcSMUGS, putative                                     | -0,5569 | 0,00006028 |

|                  |                                                         |         |            |
|------------------|---------------------------------------------------------|---------|------------|
| TcCLB.503973.300 | surface protease GP63 (pseudogene), putative            | -0,557  | 0,1148     |
| TcCLB.510275.150 | hypothetical protein, conserved (pseudogene)            | -0,5571 | 0,01768    |
| TcCLB.511559.34  | hypothetical protein, conserved                         | -0,5572 | 0,0002287  |
| TcCLB.507823.39  | hypothetical protein, conserved                         | -0,5578 | 0,0005653  |
| TcCLB.510327.5   | surface protease GP63 (pseudogene), putative            | -0,5579 | 0,05318    |
| TcCLB.511407.70  | hypothetical protein, conserved                         | -0,558  | 3,021E-09  |
| TcCLB.507237.250 | mucin-associated surface protein (MASP, pseudogene), pu | -0,558  | 0,007265   |
| TcCLB.507089.60  | hypothetical protein, conserved                         | -0,5581 | 4,097E-08  |
| TcCLB.508645.4   | hypothetical protein, conserved                         | -0,5581 | 0,003983   |
| TcCLB.503633.40  | trans-sialidase (pseudogene), putative                  | -0,5581 | 0,006661   |
| TcCLB.506583.20  | hypothetical protein, conserved                         | -0,5584 | 0,0007997  |
| TcCLB.508751.20  | trans-sialidase (pseudogene), putative                  | -0,5586 | 0,04818    |
| TcCLB.506797.40  | hypothetical protein, conserved                         | -0,5587 | 0,007974   |
| TcCLB.511257.80  | hypothetical protein                                    | -0,5589 | 0,0006145  |
| TcCLB.508111.10  | trans-sialidase (pseudogene), putative                  | -0,5592 | 0,007417   |
| TcCLB.511597.25  | hypothetical protein                                    | -0,5592 | 0,1942     |
| TcCLB.507011.20  | hypothetical protein, conserved                         | -0,5594 | 1,019E-06  |
| TcCLB.508873.240 | mucin TcMUCII, putative                                 | -0,5594 | 0,03845    |
| TcCLB.503973.340 | trans-sialidase (pseudogene), putative                  | -0,5596 | 0,1069     |
| TcCLB.508175.280 | hypothetical protein, conserved                         | -0,5601 | 2,02E-10   |
| TcCLB.511817.134 | hypothetical protein, conserved                         | -0,5601 | 8,15E-08   |
| TcCLB.508879.200 | hypothetical protein, conserved                         | -0,5604 | 7,881E-06  |
| TcCLB.504085.30  | RNA-binding protein, putative                           | -0,5605 | 4,903E-07  |
| TcCLB.509785.90  | trans-sialidase (pseudogene), putative                  | -0,5606 | 0,005554   |
| TcCLB.509801.20  | hypothetical protein, conserved                         | -0,5607 | 2,17E-07   |
| TcCLB.411427.49  | hypothetical protein, conserved (fragment)              | -0,5608 | 0,003339   |
| TcCLB.508461.460 | hypothetical protein, conserved                         | -0,5609 | 1,901E-07  |
| TcCLB.508707.64  | exonuclease, putative                                   | -0,5609 | 0,0006302  |
| TcCLB.508265.60  | hypothetical protein, conserved (pseudogene)            | -0,561  | 3,654E-09  |
| TcCLB.506791.20  | hypothetical protein, conserved                         | -0,561  | 4,224E-08  |
| TcCLB.508911.30  | hypothetical protein, conserved (pseudogene)            | -0,561  | 3,154E-07  |
| TcCLB.510441.41  | trans-sialidase (pseudogene), putative                  | -0,5611 | 1,811E-06  |
| TcCLB.510073.30  | pumilio/PUF RNA binding protein 4, putative (PUF4)      | -0,5611 | 0,301      |
| TcCLB.509767.110 | hypothetical protein, conserved                         | -0,5613 | 8,84E-07   |
| TcCLB.509267.80  | hypothetical protein                                    | -0,5616 | 0,00001456 |
| TcCLB.507681.189 | hypothetical protein, conserved                         | -0,5617 | 0,00005709 |
| TcCLB.507793.30  | hypothetical protein, conserved                         | -0,5624 | 9,225E-06  |
| TcCLB.504137.130 | hypothetical protein, conserved                         | -0,5626 | 2,438E-08  |
| TcCLB.510275.120 | hypothetical protein                                    | -0,5626 | 0,1623     |
| TcCLB.509461.40  | hypothetical protein, conserved                         | -0,5631 | 0,00001633 |
| TcCLB.511867.200 | hypothetical protein, conserved                         | -0,5633 | 2,678E-07  |
| TcCLB.508707.20  | As/Sb Reductase, putative (ACR2)                        | -0,5633 | 0,0001732  |
| TcCLB.503833.60  | hypothetical protein, conserved                         | -0,5634 | 0,00000044 |
| TcCLB.507763.30  | anion-transporting ATPase-like, putative                | -0,5635 | 2,557E-09  |
| TcCLB.506513.20  | hypothetical protein, conserved                         | -0,5636 | 0,00008635 |



|                  |                                                          |         |            |
|------------------|----------------------------------------------------------|---------|------------|
| TcCLB.509691.10  | hypothetical protein, conserved                          | -0,564  | 0,001157   |
| TcCLB.504057.65  | hypothetical protein, conserved                          | -0,5641 | 0,00001051 |
| TcCLB.504179.90  | hypothetical protein, conserved                          | -0,5644 | 6,941E-08  |
| TcCLB.511717.50  | hypothetical protein, conserved                          | -0,5647 | 9,538E-07  |
| TcCLB.508781.129 | arginine N-methyltransferase, type II, putative          | -0,5652 | 0,0002877  |
| TcCLB.504029.70  | hypothetical protein, conserved                          | -0,5654 | 0,00002435 |
| TcCLB.509985.10  | hypothetical protein, conserved (pseudogene)             | -0,5656 | 4,365E-07  |
| TcCLB.506227.240 | hypothetical protein, conserved                          | -0,5657 | 1,19E-11   |
| TcCLB.510287.20  | dolicholphosphate-mannose synthase, putative             | -0,5657 | 0,00002494 |
| TcCLB.508667.20  | hypothetical protein                                     | -0,5657 | 0,00002689 |
| TcCLB.506755.200 | hypothetical protein, conserved                          | -0,5659 | 0,00003159 |
| TcCLB.509575.50  | Casein kinase II subunit beta, putative                  | -0,5659 | 0,00004879 |
| TcCLB.506977.40  | hypothetical protein, conserved                          | -0,5662 | 2,543E-06  |
| TcCLB.510533.80  | hypothetical protein, conserved                          | -0,5662 | 0,00004193 |
| TcCLB.506355.35  | trans-sialidase (pseudogene), putative                   | -0,5668 | 0,00003225 |
| TcCLB.506801.100 | hypothetical protein, conserved                          | -0,5671 | 5,549E-07  |
| TcCLB.510175.10  | retrotransposon hot spot protein (RHS, pseudogene), puta | -0,5672 | 0,004161   |
| TcCLB.506599.130 | mucin TcMUCII (pseudogene), putative                     | -0,5675 | 0,01234    |
| TcCLB.504151.30  | hypothetical protein, conserved                          | -0,5676 | 1,219E-06  |
| TcCLB.507677.50  | hypothetical protein, conserved                          | -0,5677 | 9,991E-07  |
| TcCLB.503541.30  | hypothetical protein, conserved                          | -0,5677 | 0,001967   |
| TcCLB.510513.50  | hypothetical protein, conserved                          | -0,5683 | 5,267E-06  |
| TcCLB.510827.10  | hypothetical protein, conserved                          | -0,5688 | 0,0003203  |
| TcCLB.510055.160 | protein kinase, putative                                 | -0,5688 | 0,003577   |
| TcCLB.508099.30  | hypothetical protein                                     | -0,5689 | 0,1172     |
| TcCLB.511871.110 | hypothetical protein, conserved                          | -0,5692 | 6,815E-07  |
| TcCLB.509537.30  | hypothetical protein, conserved                          | -0,5692 | 1,225E-06  |
| TcCLB.511603.420 | syntaxin binding protein (pseudogene), putative          | -0,5692 | 0,1116     |
| TcCLB.511283.30  | hypothetical protein, conserved                          | -0,5695 | 1,67E-10   |
| TcCLB.511277.120 | hypothetical protein, conserved                          | -0,5695 | 3,6E-10    |
| TcCLB.510885.120 | hypothetical protein, conserved                          | -0,5695 | 3,262E-09  |
| TcCLB.508207.140 | hypothetical protein, conserved                          | -0,5697 | 2,051E-06  |
| TcCLB.510175.140 | hypothetical protein, conserved (pseudogene)             | -0,5699 | 0,00003837 |
| TcCLB.510899.40  | hypothetical protein, conserved                          | -0,5699 | 0,0003944  |
| TcCLB.506945.90  | hypothetical protein, conserved                          | -0,5702 | 0,004143   |
| TcCLB.507467.70  | diacylglycerol acyltransferase, putative                 | -0,5703 | 5,623E-09  |
| TcCLB.510565.100 | hypothetical protein, conserved                          | -0,5703 | 8,035E-06  |
| TcCLB.509217.180 | trans-sialidase (pseudogene), putative                   | -0,5703 | 0,1822     |
| TcCLB.511159.20  | origin recognition complex subunit 1 (ORC1), putative    | -0,5705 | 0,000382   |
| TcCLB.504117.50  | hypothetical protein, conserved (pseudogene)             | -0,5708 | 0,04351    |
| TcCLB.511753.20  | class I nuclease-like protein, putative                  | -0,5709 | 0,00006973 |
| TcCLB.436761.20  | hypothetical protein, conserved (fragment)               | -0,571  | 0,07257    |
| TcCLB.510823.10  | hypothetical protein, conserved                          | -0,5711 | 3,642E-10  |
| TcCLB.510553.11  | hypothetical protein, conserved (pseudogene)             | -0,5711 | 0,03257    |
| TcCLB.506885.4   | hypothetical protein, conserved (fragment)               | -0,5718 | 1,404E-07  |

|                  |                                                             |         |            |
|------------------|-------------------------------------------------------------|---------|------------|
| TcCLB.510055.130 | hypothetical protein, conserved (pseudogene)                | -0,5718 | 3,671E-07  |
| TcCLB.507483.50  | calmodulin (CALA2)                                          | -0,5718 | 0,0003684  |
| TcCLB.506135.30  | hypothetical protein, conserved                             | -0,5719 | 0,00000393 |
| TcCLB.510519.50  | hypothetical protein, conserved                             | -0,5719 | 8,143E-06  |
| TcCLB.508855.10  | trans-sialidase, putative                                   | -0,572  | 0,00005812 |
| TcCLB.503715.40  | protein kinase, putative                                    | -0,5721 | 0,005836   |
| TcCLB.510515.40  | hypothetical protein, conserved                             | -0,5725 | 0,008835   |
| TcCLB.509485.30  | hypothetical protein, conserved (pseudogene)                | -0,5728 | 0,09791    |
| TcCLB.509437.50  | AAA ATPase, putative                                        | -0,5729 | 2,968E-09  |
| TcCLB.508593.44  | serine peptidase, Clan SC, Family S9D                       | -0,5733 | 1,672E-08  |
| TcCLB.511293.50  | kinesin, putative                                           | -0,5733 | 4,644E-07  |
| TcCLB.503819.20  | DNA-directed RNA polymerase III subunit, putative           | -0,5733 | 0,0003299  |
| TcCLB.507447.10  | hypothetical protein, conserved                             | -0,5734 | 1,349E-06  |
| TcCLB.511859.60  | subtilisin peptidase                                        | -0,5735 | 0,00000135 |
| TcCLB.504769.150 | hypothetical protein                                        | -0,5735 | 0,1746     |
| TcCLB.506491.10  | casein kinase I, putative                                   | -0,5736 | 0,01013    |
| TcCLB.511291.20  | hypothetical protein, conserved                             | -0,5739 | 3,664E-06  |
| TcCLB.507005.10  | hypothetical protein                                        | -0,5741 | 0,004656   |
| TcCLB.508175.350 | zinc finger protein family member, putative (POMP35)        | -0,5742 | 1,694E-08  |
| TcCLB.506479.39  | serine/threonine protein phosphatase 2A regulatory subunit  | -0,5748 | 5,85E-07   |
| TcCLB.503653.90  | hypothetical protein, conserved                             | -0,5749 | 9,697E-07  |
| TcCLB.507237.220 | mucin-associated surface protein (MASP), putative           | -0,5749 | 0,1881     |
| TcCLB.510955.4   | lipase-like protein, putative                               | -0,5751 | 3,096E-08  |
| TcCLB.508707.149 | hypothetical protein, conserved                             | -0,5751 | 0,00003173 |
| TcCLB.441729.9   | hypothetical protein (fragment)                             | -0,5755 | 0,006461   |
| TcCLB.510973.9   | hypothetical protein, conserved                             | -0,5757 | 0,000001   |
| TcCLB.509663.5   | dehydrogenase (pseudogene), putative                        | -0,5759 | 0,01831    |
| TcCLB.506661.50  | hypothetical protein, conserved                             | -0,576  | 6,841E-10  |
| TcCLB.503801.60  | hypothetical protein                                        | -0,5761 | 0,0000166  |
| TcCLB.510655.10  | hypothetical protein, conserved                             | -0,5761 | 0,00002825 |
| TcCLB.511875.110 | trans-sialidase (pseudogene), putative                      | -0,5763 | 0,001062   |
| TcCLB.506297.320 | hypothetical protein                                        | -0,5764 | 4,376E-08  |
| TcCLB.507775.10  | hypothetical protein, conserved                             | -0,5764 | 2,999E-06  |
| TcCLB.509897.230 | trans-sialidase (pseudogene), putative                      | -0,5765 | 0,00002738 |
| TcCLB.508231.130 | Cell division control protein 48, putative                  | -0,5767 | 0,001661   |
| TcCLB.506407.50  | hypothetical protein, conserved                             | -0,5768 | 6,28E-07   |
| TcCLB.506495.40  | hypothetical protein                                        | -0,577  | 5,964E-08  |
| TcCLB.506229.30  | hypothetical protein                                        | -0,5771 | 2,179E-07  |
| TcCLB.504151.20  | hypothetical protein, conserved                             | -0,5772 | 0,00000805 |
| TcCLB.509321.10  | hypothetical protein, conserved                             | -0,5773 | 8,109E-11  |
| TcCLB.506223.10  | hypothetical protein, conserved                             | -0,5773 | 0,00003657 |
| TcCLB.503973.190 | mucin-associated surface protein (MASP), putative           | -0,5773 | 0,09444    |
| TcCLB.508347.40  | hypothetical protein, conserved                             | -0,5788 | 1,191E-14  |
| TcCLB.509935.10  | hypothetical protein                                        | -0,5788 | 0,006009   |
| TcCLB.510513.10  | mannosyl-oligosaccharide 1,2-alpha-mannosidase IB, putative | -0,5789 | 5,703E-08  |

|                  |                                                          |         |            |
|------------------|----------------------------------------------------------|---------|------------|
| TcCLB.510725.70  | hypothetical protein, conserved                          | -0,579  | 1,901E-08  |
| TcCLB.509669.170 | hypothetical protein, conserved                          | -0,5793 | 8,54E-11   |
| TcCLB.507145.60  | trans-sialidase, Group V, putative                       | -0,5793 | 0,03437    |
| TcCLB.509683.80  | adenylosuccinate synthetase, putative                    | -0,5794 | 7,246E-06  |
| TcCLB.511501.30  | ABC transporter, putative                                | -0,5794 | 0,00003282 |
| TcCLB.503839.30  | hypothetical protein, conserved                          | -0,5796 | 1,333E-10  |
| TcCLB.503683.30  | RNA-binding protein, putative                            | -0,5797 | 0,0006639  |
| TcCLB.511189.54  | hypothetical protein                                     | -0,5798 | 2,734E-06  |
| TcCLB.510275.160 | trans-sialidase (pseudogene), putative                   | -0,5798 | 0,02811    |
| TcCLB.509567.30  | serine/threonine-protein kinase, putative                | -0,5803 | 1,742E-11  |
| TcCLB.506887.40  | hypothetical protein, conserved                          | -0,5804 | 4,92E-08   |
| TcCLB.506113.86  | N-acetyltransferase complex ARD1 subunit (pseudogene),   | -0,5804 | 0,02229    |
| TcCLB.506945.340 | hypothetical protein, conserved                          | -0,5807 | 6,172E-10  |
| TcCLB.507053.90  | conserved protein, unknown function                      | -0,5807 | 9,101E-08  |
| TcCLB.508215.6   | hypothetical protein, conserved                          | -0,5808 | 4,795E-08  |
| TcCLB.508771.20  | cysteine peptidase, Clan CA, family C51, putative        | -0,5811 | 6,245E-09  |
| TcCLB.509925.5   | trans-sialidase (pseudogene), putative                   | -0,5818 | 0,007262   |
| TcCLB.504777.30  | surface protease GP63 (pseudogene), putative             | -0,582  | 0,003621   |
| TcCLB.508913.10  | trans-sialidase (pseudogene), putative                   | -0,5822 | 6,909E-06  |
| TcCLB.511793.30  | mucin-associated surface protein (MASP), putative        | -0,5822 | 0,2841     |
| TcCLB.506815.50  | hypothetical protein, conserved                          | -0,5824 | 1,243E-07  |
| TcCLB.508227.10  | hypothetical protein                                     | -0,5826 | 0,2688     |
| TcCLB.509911.120 | hypothetical protein                                     | -0,5828 | 5,26E-13   |
| TcCLB.503781.60  | tRNA pseudouridine synthase A, putative                  | -0,5828 | 5,363E-08  |
| TcCLB.508153.630 | mitochondrial carrier protein, putative                  | -0,5828 | 0,00005778 |
| TcCLB.418185.70  | trans-sialidase, Group II, putative                      | -0,5832 | 0,003194   |
| TcCLB.510911.58  | retrotransposon hot spot protein (RHS, pseudogene), puta | -0,5832 | 0,06494    |
| TcCLB.511853.21  | mucin-associated surface protein (MASP, pseudogene), pi  | -0,5841 | 0,01149    |
| TcCLB.506133.207 | mucin-associated surface protein (MASP, pseudogene), pi  | -0,5846 | 0,08175    |
| TcCLB.504085.10  | hypothetical protein, conserved                          | -0,5847 | 1,046E-07  |
| TcCLB.506699.9   | hypothetical protein, conserved                          | -0,5847 | 0,00005781 |
| TcCLB.506757.20  | hypothetical protein, conserved                          | -0,5848 | 4,813E-06  |
| TcCLB.507055.20  | hypothetical protein, conserved (fragment)               | -0,5849 | 0,0001805  |
| TcCLB.511577.104 | hypothetical protein, conserved                          | -0,585  | 0,0002099  |
| TcCLB.506435.70  | hypothetical protein, conserved (pseudogene)             | -0,5856 | 1,274E-12  |
| TcCLB.503867.10  | hypothetical protein, conserved                          | -0,5857 | 3,975E-06  |
| TcCLB.507085.120 | hypothetical protein                                     | -0,586  | 0,1355     |
| TcCLB.505997.31  | ATP-dependent DEAD/H RNA helicase (pseudogene), puta     | -0,5862 | 0,01523    |
| TcCLB.509695.50  | katanin, putative                                        | -0,5865 | 0,003874   |
| TcCLB.504133.30  | tyrosine protein kinase, putative                        | -0,5866 | 4,776E-11  |
| TcCLB.511627.159 | hypothetical protein, conserved (fragment)               | -0,5866 | 0,0001897  |
| TcCLB.510553.20  | trans-sialidase (pseudogene), putative                   | -0,5867 | 0,01247    |
| TcCLB.510259.12  | hypothetical protein, conserved                          | -0,5869 | 0,001686   |
| TcCLB.511361.40  | actin-related protein 2, putative                        | -0,587  | 2,112E-06  |
| TcCLB.503869.20  | hypothetical protein, conserved                          | -0,5874 | 0,00003639 |

|                  |                                                     |         |            |
|------------------|-----------------------------------------------------|---------|------------|
| TcCLB.509569.150 | hypothetical protein, conserved                     | -0,5874 | 0,0007207  |
| TcCLB.511585.100 | hypothetical protein, conserved                     | -0,5875 | 0,0002986  |
| TcCLB.511517.160 | hypothetical protein, conserved                     | -0,5877 | 7,1E-10    |
| TcCLB.509417.9   | trans-sialidase, putative                           | -0,588  | 0,0000869  |
| TcCLB.420989.10  | protein phosphatase 2C, putative                    | -0,5882 | 0,007325   |
| TcCLB.511557.20  | hypothetical protein, conserved                     | -0,5883 | 0,00001072 |
| TcCLB.506659.39  | protein phosphatase 2C, putative                    | -0,5883 | 0,005614   |
| TcCLB.507035.110 | cAMP response protein 1, putative (CARP1)           | -0,5884 | 1,091E-07  |
| TcCLB.507681.259 | Flagellar Member 1 (fragment) (FLAM1)               | -0,5884 | 1,653E-06  |
| TcCLB.503755.30  | DNA polymerase kappa, putative                      | -0,5884 | 0,003531   |
| TcCLB.503583.50  | hypothetical protein, conserved                     | -0,5885 | 4,268E-06  |
| TcCLB.510403.71  | trans-sialidase (pseudogene), putative              | -0,5888 | 6,177E-10  |
| TcCLB.506829.71  | hypothetical protein, conserved (pseudogene)        | -0,5893 | 0,001663   |
| TcCLB.509669.14  | thioredoxin, putative                               | -0,5899 | 0,00002144 |
| TcCLB.504105.160 | splicing factor ptsr1 interacting protein, putative | -0,5902 | 1,491E-10  |
| TcCLB.505807.54  | hypothetical protein, conserved                     | -0,5902 | 4,023E-06  |
| TcCLB.506957.120 | hypothetical protein, conserved                     | -0,5904 | 1,671E-13  |
| TcCLB.510101.280 | kinesin, putative                                   | -0,5911 | 6,313E-17  |
| TcCLB.511613.120 | mucin TcMUCII, putative                             | -0,5911 | 0,1076     |
| TcCLB.511163.30  | NGG1 interacting factor 3, putative                 | -0,5912 | 0,0001931  |
| TcCLB.511063.61  | hypothetical protein, conserved (pseudogene)        | -0,5914 | 0,08566    |
| TcCLB.508543.40  | hypothetical protein, conserved                     | -0,5915 | 0,0006471  |
| TcCLB.506483.10  | Triglyceride lipase, putative                       | -0,5919 | 5,295E-06  |
| TcCLB.503721.20  | hypothetical protein, conserved                     | -0,5924 | 7,092E-07  |
| TcCLB.508385.50  | hypothetical protein, conserved                     | -0,5925 | 1,065E-06  |
| TcCLB.507669.14  | hypothetical protein, conserved                     | -0,5926 | 8,633E-09  |
| TcCLB.506673.69  | hypothetical protein, conserved                     | -0,5926 | 0,0001803  |
| TcCLB.510623.45  | surface protease GP63 (pseudogene), putative        | -0,5927 | 0,01924    |
| TcCLB.507757.70  | dihydrolipoamide dehydrogenase, putative            | -0,5931 | 0,00004568 |
| TcCLB.510483.234 | mucin TcMUC (pseudogene), putative                  | -0,5931 | 0,0508     |
| TcCLB.503787.30  | hypothetical protein                                | -0,5932 | 0,02499    |
| TcCLB.507087.14  | hypothetical protein, conserved                     | -0,5934 | 0,002375   |
| TcCLB.507029.50  | hypothetical protein, conserved                     | -0,5934 | 0,008263   |
| TcCLB.510013.180 | hypothetical protein                                | -0,5935 | 0,1174     |
| TcCLB.510329.200 | UDP-GlcNAc:PI a1-6 GlcNAc-transferase, putative     | -0,5939 | 5,825E-13  |
| TcCLB.503887.50  | hypothetical protein, conserved                     | -0,5942 | 2,091E-07  |
| TcCLB.506475.113 | hypothetical protein, conserved                     | -0,5945 | 8,609E-08  |
| TcCLB.508647.10  | hypothetical protein, conserved                     | -0,5948 | 1,691E-08  |
| TcCLB.509823.4   | hypothetical protein, conserved                     | -0,5951 | 9,872E-06  |
| TcCLB.505987.70  | phosphatidylinositol 4-kinase, putative             | -0,5952 | 1,445E-06  |
| TcCLB.510773.70  | dynein heavy chain, putative                        | -0,5953 | 6,889E-08  |
| TcCLB.506327.50  | hypothetical protein, conserved                     | -0,5956 | 8,669E-09  |
| TcCLB.506133.120 | syntaxin binding protein (pseudogene), putative     | -0,5956 | 0,08545    |
| TcCLB.508799.50  | hypothetical protein                                | -0,5959 | 2,951E-07  |
| TcCLB.506559.148 | hypothetical protein, conserved                     | -0,5959 | 3,896E-06  |

|                  |                                                          |         |            |
|------------------|----------------------------------------------------------|---------|------------|
| TcCLB.511731.20  | hypothetical protein, conserved                          | -0,5963 | 1,07E-10   |
| TcCLB.510779.20  | hypothetical protein (fragment)                          | -0,5967 | 0,001217   |
| TcCLB.507747.240 | hypothetical protein, conserved                          | -0,597  | 7,932E-10  |
| TcCLB.510361.209 | mucin-associated surface protein (MASP, pseudogene), pu  | -0,5972 | 0,05857    |
| TcCLB.507943.50  | hypothetical protein, conserved                          | -0,598  | 0,00005875 |
| TcCLB.510607.75  | hypothetical protein, conserved (pseudogene)             | -0,598  | 0,002689   |
| TcCLB.507089.130 | hypothetical protein, conserved                          | -0,5985 | 5,212E-08  |
| TcCLB.509799.120 | hypothetical protein, conserved                          | -0,5986 | 0,00000213 |
| TcCLB.510213.20  | hypothetical protein                                     | -0,5986 | 0,149      |
| TcCLB.508637.19  | hypothetical protein, conserved                          | -0,5987 | 0,2378     |
| TcCLB.508443.10  | hypothetical protein, conserved                          | -0,5989 | 0,00000345 |
| TcCLB.507237.60  | surface protease GP63 (pseudogene), putative             | -0,5989 | 0,003905   |
| TcCLB.510635.50  | zinc-binding phosphatase, putative                       | -0,599  | 4,097E-09  |
| TcCLB.511417.40  | DNA-directed RNA polymerase III, putative                | -0,6    | 5,465E-09  |
| TcCLB.511545.190 | GPI transamidase component Tta1, putative (TTA1)         | -0,6001 | 0,00002669 |
| TcCLB.507831.110 | pumilio/PUF RNA binding protein 2, putative (PUF2)       | -0,6002 | 0,2135     |
| TcCLB.508699.30  | hypothetical protein, conserved                          | -0,6004 | 0,00008015 |
| TcCLB.511585.40  | DNA-damage inducible protein DDI1-like protein, putative | -0,6008 | 1,321E-08  |
| TcCLB.504397.9   | surface protease GP63, putative (fragment)               | -0,6008 | 0,009588   |
| TcCLB.511777.10  | trans-sialidase, putative (fragment)                     | -0,6011 | 0,09336    |
| TcCLB.510663.40  | hypothetical protein, conserved                          | -0,6012 | 3,833E-09  |
| TcCLB.510421.280 | hypothetical protein, conserved                          | -0,6012 | 4,516E-09  |
| TcCLB.506567.50  | hypothetical protein, conserved                          | -0,6012 | 7,622E-07  |
| TcCLB.506241.80  | hypothetical protein, conserved                          | -0,6014 | 0,00002274 |
| TcCLB.506315.80  | hypothetical protein, conserved                          | -0,6016 | 1,784E-07  |
| TcCLB.503957.25  | trans-sialidase (pseudogene), putative                   | -0,6017 | 0,007033   |
| TcCLB.507941.110 | hypothetical protein, conserved                          | -0,602  | 7,254E-08  |
| TcCLB.507709.10  | hypothetical protein, conserved                          | -0,6021 | 0,00009461 |
| TcCLB.509161.100 | hypothetical protein, conserved                          | -0,6026 | 4,297E-08  |
| TcCLB.510593.30  | hypothetical protein, conserved                          | -0,6026 | 1,277E-07  |
| TcCLB.510031.50  | ATP-dependent RNA helicase, putative                     | -0,6028 | 1,517E-07  |
| TcCLB.509979.290 | trans-sialidase (pseudogene), putative                   | -0,6028 | 0,0002746  |
| TcCLB.509521.70  | hypothetical protein                                     | -0,6028 | 0,1585     |
| TcCLB.508775.35  | retrotransposon hot spot protein (RHS, pseudogene), puta | -0,6032 | 0,05118    |
| TcCLB.509217.170 | hypothetical protein                                     | -0,6035 | 0,02969    |
| TcCLB.510187.230 | formin, putative                                         | -0,6036 | 1,877E-09  |
| TcCLB.508873.454 | mucin TcMUC (pseudogene), putative                       | -0,6036 | 0,103      |
| TcCLB.506811.50  | hypothetical protein, conserved                          | -0,6037 | 0,03707    |
| TcCLB.506589.100 | hypothetical protein                                     | -0,6038 | 0,09025    |
| TcCLB.506789.249 | bilobe protein, conserved                                | -0,604  | 3,566E-12  |
| TcCLB.508387.110 | hypothetical protein, conserved                          | -0,6043 | 2,171E-08  |
| TcCLB.504741.90  | hypothetical protein, conserved                          | -0,6043 | 0,00005939 |
| TcCLB.511501.40  | hypothetical protein, conserved                          | -0,605  | 0,00004273 |
| TcCLB.509559.40  | trans-sialidase (pseudogene), putative                   | -0,6053 | 0,0001437  |
| TcCLB.507681.30  | hypothetical protein, conserved                          | -0,6056 | 2,227E-11  |

|                  |                                                           |         |            |
|------------------|-----------------------------------------------------------|---------|------------|
| TcCLB.484949.9   | AGC/RSK family serine/threonine kinase, putative (fragm   | -0,6056 | 0,002823   |
| TcCLB.505977.40  | inositol/phosphatidylinositol phosphatase (pseudogene), p | -0,606  | 7,744E-16  |
| TcCLB.508777.60  | hypothetical protein, conserved                           | -0,6063 | 8,834E-06  |
| TcCLB.509885.50  | hypothetical protein, conserved                           | -0,6064 | 1,418E-07  |
| TcCLB.507641.200 | hypothetical protein, conserved                           | -0,6065 | 0,00009337 |
| TcCLB.509053.100 | protein kinase, putative                                  | -0,6067 | 8,794E-10  |
| TcCLB.508831.30  | hypothetical protein, conserved                           | -0,6069 | 0,00001238 |
| TcCLB.503757.40  | Casein kinase II subunit beta, putative                   | -0,6076 | 2,766E-07  |
| TcCLB.510463.180 | trans-sialidase (pseudogene), putative                    | -0,608  | 0,0405     |
| TcCLB.505943.79  | retrotransposon hot spot protein (RHS, pseudogene), puta  | -0,6087 | 0,1523     |
| TcCLB.511727.230 | Repressor of differentiation kinase 1, putative (RDK1.2)  | -0,6089 | 4,853E-11  |
| TcCLB.509647.60  | hypothetical protein, conserved                           | -0,6092 | 4,123E-12  |
| TcCLB.507711.140 | hypothetical protein, conserved                           | -0,6093 | 0,00006541 |
| TcCLB.506339.60  | trans-sialidase (pseudogene), putative                    | -0,6093 | 0,006226   |
| TcCLB.506537.210 | trans-sialidase (pseudogene), putative                    | -0,6096 | 0,00001145 |
| TcCLB.509103.4   | protein kinase, putative                                  | -0,6106 | 0,01949    |
| TcCLB.503579.110 | pseudouridylate synthase I, putative                      | -0,6109 | 1,118E-06  |
| TcCLB.505163.10  | hypothetical protein, conserved                           | -0,6111 | 0,001755   |
| TcCLB.511921.71  | hypothetical protein, conserved (pseudogene)              | -0,6112 | 0,008156   |
| TcCLB.508233.60  | heat shock protein 100 (clp protein), putative            | -0,6115 | 0,001122   |
| TcCLB.509151.90  | hypothetical protein, conserved                           | -0,612  | 1,028E-08  |
| TcCLB.508409.20  | hypothetical protein, conserved                           | -0,6124 | 2,486E-08  |
| TcCLB.506525.40  | syntaxin 5, putative                                      | -0,6126 | 1,863E-09  |
| TcCLB.506269.50  | mucin-associated surface protein (MASP, pseudogene), p    | -0,6128 | 0,02892    |
| TcCLB.510175.110 | trans-sialidase (pseudogene), putative                    | -0,6131 | 0,0002155  |
| TcCLB.509213.130 | autophagocytosis associated protein, putative             | -0,6132 | 1,587E-06  |
| TcCLB.508637.160 | dual specificity protein phosphatase, putative            | -0,6134 | 2,588E-06  |
| TcCLB.504155.20  | trans-sialidase, Group V, putative                        | -0,6134 | 0,004763   |
| TcCLB.508375.5   | elongation factor 1-gamma (EF-1-gamma, pseudogene), p     | -0,6137 | 0,001809   |
| TcCLB.509353.10  | E1-like ubiquitin-activating enzyme, putative (UBA5)      | -0,6141 | 0,001064   |
| TcCLB.503693.29  | hypothetical protein                                      | -0,6142 | 2,456E-08  |
| TcCLB.509097.10  | hypothetical protein                                      | -0,6142 | 0,2068     |
| TcCLB.506957.140 | phosphatidylinositol-4-phosphate 5-kinase-like, putative  | -0,6145 | 1,917E-11  |
| TcCLB.508277.10  | condensin subunit 1, putative                             | -0,615  | 8,242E-12  |
| TcCLB.508213.9   | regulator of chromosome condensation, putative            | -0,615  | 8,581E-12  |
| TcCLB.504035.149 | kinesin, putative                                         | -0,615  | 1,326E-08  |
| TcCLB.509777.60  | ADG2, putative                                            | -0,6152 | 4,372E-08  |
| TcCLB.421621.35  | surface protease GP63 (pseudogene), putative              | -0,6153 | 0,1654     |
| TcCLB.508909.80  | hypothetical protein                                      | -0,6154 | 5,927E-06  |
| TcCLB.506763.270 | hypothetical protein, conserved (pseudogene)              | -0,6155 | 0,005732   |
| TcCLB.421555.9   | mucin-associated surface protein (MASP), putative         | -0,6157 | 0,0003684  |
| TcCLB.509945.10  | ERAD-associated E3 ubiquitin-protein ligase HRD1, putati  | -0,6158 | 1,852E-12  |
| TcCLB.504005.10  | endonuclease III, putative                                | -0,6159 | 0,00001412 |
| TcCLB.510351.80  | hypothetical protein, conserved                           | -0,6159 | 0,00001765 |
| TcCLB.511215.90  | hypothetical protein, conserved                           | -0,6162 | 0,01849    |

|                  |                                                           |         |            |
|------------------|-----------------------------------------------------------|---------|------------|
| TcCLB.503981.60  | hypothetical protein, conserved                           | -0,6165 | 1,125E-09  |
| TcCLB.511689.10  | hypothetical protein                                      | -0,6166 | 0,00003356 |
| TcCLB.511929.40  | trans-sialidase (pseudogene), putative                    | -0,6168 | 0,01471    |
| TcCLB.511847.10  | calpain-like cysteine peptidase, putative                 | -0,6173 | 5,773E-10  |
| TcCLB.504123.40  | hypothetical protein, conserved                           | -0,6174 | 3,032E-06  |
| TcCLB.508955.10  | syntaxin, putative                                        | -0,6174 | 0,00005261 |
| TcCLB.507047.170 | hypothetical protein, conserved                           | -0,6177 | 0,001018   |
| TcCLB.508359.70  | hypothetical protein                                      | -0,6177 | 0,05642    |
| TcCLB.506139.140 | trans-sialidase (pseudogene), putative                    | -0,6178 | 0,02389    |
| TcCLB.511043.10  | hypothetical protein, conserved                           | -0,618  | 5,329E-15  |
| TcCLB.414243.20  | hypothetical protein, conserved                           | -0,618  | 5,995E-07  |
| TcCLB.510739.10  | hypothetical protein, conserved                           | -0,6181 | 0,00000924 |
| TcCLB.508175.250 | hypothetical protein, conserved                           | -0,6182 | 6,478E-14  |
| TcCLB.504051.9   | hypothetical protein, conserved                           | -0,6183 | 6,509E-07  |
| TcCLB.511717.174 | hypothetical protein, conserved                           | -0,6186 | 5,033E-09  |
| TcCLB.510697.55  | mucin TcMUCII (pseudogene), putative                      | -0,6187 | 0,02961    |
| TcCLB.511281.20  | transporter, putative                                     | -0,6188 | 3,349E-09  |
| TcCLB.509167.80  | hypothetical protein, conserved                           | -0,619  | 2,483E-11  |
| TcCLB.506945.140 | hypothetical protein, conserved (pseudogene)              | -0,619  | 8,745E-09  |
| TcCLB.508717.53  | hypothetical protein, conserved                           | -0,6191 | 3,333E-12  |
| TcCLB.506579.100 | hypothetical protein, conserved                           | -0,6191 | 9,379E-08  |
| TcCLB.511543.10  | hypothetical protein, conserved                           | -0,6191 | 0,00000256 |
| TcCLB.506655.7   | phospholipid-transporting ATPase, putative (fragment)     | -0,6192 | 5,837E-06  |
| TcCLB.504249.65  | mucin TcMUCII, putative                                   | -0,6192 | 0,007905   |
| TcCLB.490989.10  | trans-sialidase, putative                                 | -0,6195 | 0,008561   |
| TcCLB.505941.49  | hypothetical protein, conserved                           | -0,6197 | 6,409E-06  |
| TcCLB.506993.130 | mucin-associated surface protein (MASP, pseudogene), pu   | -0,6197 | 0,0002581  |
| TcCLB.506763.210 | hypothetical protein                                      | -0,6199 | 0,02646    |
| TcCLB.511445.110 | hypothetical protein, conserved                           | -0,62   | 0,00002165 |
| TcCLB.507057.60  | hypothetical protein, conserved                           | -0,62   | 0,0000368  |
| TcCLB.511245.240 | serine/threonine protein kinase, putative                 | -0,62   | 0,0004569  |
| TcCLB.507771.114 | hypothetical protein, conserved                           | -0,62   | 0,0009236  |
| TcCLB.506405.40  | hypothetical protein, conserved                           | -0,6203 | 1,108E-07  |
| TcCLB.510089.50  | hypothetical protein, conserved                           | -0,6204 | 3,544E-10  |
| TcCLB.508319.79  | hypothetical protein, conserved                           | -0,6205 | 0,04869    |
| TcCLB.508559.20  | trans-sialidase (pseudogene), putative                    | -0,6208 | 3,857E-08  |
| TcCLB.511277.140 | serine/threonine protein kinase, putative                 | -0,6208 | 1,214E-07  |
| TcCLB.504157.40  | DNA replication licensing factor MCM3, putative           | -0,6208 | 6,262E-07  |
| TcCLB.507489.9   | dispersed gene family protein 1 (DGF-1), putative (fragme | -0,621  | 0,1777     |
| TcCLB.404001.10  | hypothetical protein, conserved                           | -0,6213 | 3,884E-11  |
| TcCLB.479481.5   | elongation factor 1-gamma (EF-1-gamma, pseudogene),       | -0,6213 | 0,08008    |
| TcCLB.508433.80  | hypothetical protein                                      | -0,6214 | 0,1503     |
| TcCLB.506269.70  | mucin TcMUCII, putative                                   | -0,6215 | 0,02718    |
| TcCLB.509669.150 | hypothetical protein, conserved                           | -0,6217 | 3,546E-08  |
| TcCLB.510403.30  | trans-sialidase, Group II, putative                       | -0,6219 | 0,02676    |

|                   |                                                            |         |            |
|-------------------|------------------------------------------------------------|---------|------------|
| TcCLB.509907.60   | trans-sialidase (pseudogene), putative                     | -0,622  | 0,005717   |
| TcCLB.479517.30   | hypothetical protein                                       | -0,6222 | 0,2083     |
| TcCLB.504247.79   | transmembrane protein, conserved (fragment)                | -0,6223 | 1,531E-06  |
| TcCLB.509551.120  | hypothetical protein                                       | -0,6228 | 0,0004007  |
| TcCLB.511299.10   | Triglyceride lipase, putative (fragment)                   | -0,623  | 0,004323   |
| TcCLB.507747.210  | hypothetical protein, conserved                            | -0,6232 | 5,523E-08  |
| TcCLB.507683.30   | hypothetical protein, conserved                            | -0,6239 | 2,668E-12  |
| TcCLB.510441.10   | hypothetical protein                                       | -0,624  | 0,006724   |
| TcCLB.504153.100  | Tubulin cofactor C domain-containing protein 1, putative ( | -0,6241 | 1,768E-10  |
| TcCLB.508233.70   | ATP-dependent protease binding subunit (pseudogene), p     | -0,6247 | 0,0001153  |
| TcCLB.507357.35   | hypothetical protein                                       | -0,6247 | 0,0807     |
| TcCLB.506965.60   | elongation factor 1-gamma (EF-1-gamma, pseudogene),        | -0,6252 | 0,1952     |
| TcCLB.506349.83   | retrotransposon hot spot protein (RHS, pseudogene), puta   | -0,6253 | 0,0001042  |
| TcCLB.503995.10   | Present in the outer mitochondrial membrane proteome 1     | -0,6254 | 0,00001589 |
| TcCLB.509627.10   | bilobe protein, conserved                                  | -0,6258 | 1,155E-14  |
| TcCLB.508987.30   | serine/threonine-protein kinase, putative                  | -0,6258 | 2,523E-13  |
| TcCLB.503881.30   | retrotransposon hot spot (RHS) protein, putative           | -0,6258 | 0,0004042  |
| TcCLB.504109.60   | hypothetical protein, conserved                            | -0,626  | 2,311E-12  |
| TcCLB.506525.30   | hypothetical protein, conserved                            | -0,6261 | 1,1E-10    |
| TcCLB.508277.300  | hypothetical protein, conserved                            | -0,6261 | 3,754E-07  |
| TcCLB.507615.70   | deoxyhypusine hydroxylase, putative                        | -0,6265 | 0,0000242  |
| TcCLB.506931.60   | hypothetical protein                                       | -0,6266 | 1,432E-06  |
| TcCLB.506155.30   | kinesin-like protein, putative                             | -0,6267 | 1,29E-09   |
| TcCLB.507307.30   | peptidylprolyl isomerase (pseudogene), putative            | -0,6268 | 0,1042     |
| TcCLB.508153.1010 | hypothetical protein, conserved                            | -0,6271 | 1,687E-10  |
| TcCLB.507677.20   | hypothetical protein, conserved                            | -0,6272 | 1,007E-06  |
| TcCLB.510465.60   | hypothetical protein, conserved (pseudogene)               | -0,6273 | 0,003314   |
| TcCLB.511127.220  | cdc2-related kinase 12 (CRK12)                             | -0,628  | 3,088E-11  |
| TcCLB.421621.20   | syntaxin binding protein (pseudogene), putative            | -0,6283 | 0,01766    |
| TcCLB.507723.120  | U1A small nuclear ribonucleoprotein, putative              | -0,6284 | 0,0002699  |
| TcCLB.508601.70   | hypothetical protein, conserved                            | -0,6286 | 6,22E-07   |
| TcCLB.506993.190  | hypothetical protein                                       | -0,6287 | 0,1334     |
| TcCLB.509161.120  | hypothetical protein, conserved                            | -0,6288 | 1,68E-09   |
| TcCLB.508953.28   | hypothetical protein, conserved                            | -0,6293 | 0,00001755 |
| TcCLB.507765.100  | hypothetical protein, conserved                            | -0,6296 | 3,902E-07  |
| TcCLB.511797.260  | mucin-associated surface protein (MASP, pseudogene), pi    | -0,6298 | 0,06508    |
| TcCLB.507241.10   | protein phosphatase 2A regulatory subunit, putative        | -0,6299 | 2,358E-11  |
| TcCLB.508989.100  | hypothetical protein, conserved                            | -0,6302 | 5,947E-08  |
| TcCLB.507787.120  | hypothetical protein, conserved                            | -0,6305 | 0,00003142 |
| TcCLB.507025.50   | RNA-binding protein, putative                              | -0,6308 | 0,0007016  |
| TcCLB.511557.40   | hypothetical protein, conserved                            | -0,6309 | 3,782E-08  |
| TcCLB.506179.40   | hypothetical protein, conserved                            | -0,6309 | 1,968E-07  |
| TcCLB.504147.170  | gamma-tubulin complex subunit, putative                    | -0,6311 | 3,913E-16  |
| TcCLB.511529.40   | hypothetical protein, conserved                            | -0,6311 | 9,621E-08  |
| TcCLB.510475.51   | mucin-associated surface protein (MASP, pseudogene), pi    | -0,6313 | 0,1328     |



|                  |                                                         |         |            |
|------------------|---------------------------------------------------------|---------|------------|
| TcCLB.510885.130 | hypothetical protein, conserved                         | -0,6318 | 4,142E-08  |
| TcCLB.504215.30  | hypothetical protein, conserved                         | -0,6319 | 3,358E-08  |
| TcCLB.509071.10  | hypothetical protein, conserved (pseudogene)            | -0,6321 | 0,001306   |
| TcCLB.507941.130 | hypothetical protein, conserved                         | -0,6322 | 3,97E-07   |
| TcCLB.506779.150 | histone H2B variant, putative                           | -0,6323 | 1,587E-09  |
| TcCLB.503823.30  | hypothetical protein, conserved                         | -0,6323 | 3,137E-08  |
| TcCLB.510713.11  | hypothetical protein, conserved (pseudogene)            | -0,6324 | 0,003265   |
| TcCLB.510329.90  | C-8 sterol isomerase, putative                          | -0,6326 | 7,317E-08  |
| TcCLB.503417.33  | hypothetical protein                                    | -0,6326 | 0,1133     |
| TcCLB.509571.40  | hypothetical protein, conserved                         | -0,6328 | 1,7E-12    |
| TcCLB.507001.140 | hypothetical protein, conserved                         | -0,6328 | 8,667E-08  |
| TcCLB.510463.211 | trans-sialidase (pseudogene), putative                  | -0,6329 | 0,03812    |
| TcCLB.507881.110 | trans-sialidase (pseudogene), putative                  | -0,6331 | 4,082E-08  |
| TcCLB.511127.270 | ankyrin repeat protein, putative                        | -0,6331 | 8,951E-07  |
| TcCLB.508153.190 | kinesin, putative                                       | -0,6335 | 7,985E-12  |
| TcCLB.507765.140 | hypothetical protein, conserved                         | -0,6339 | 1,73E-12   |
| TcCLB.511603.141 | syntaxin binding protein (pseudogene), putative         | -0,6339 | 0,07771    |
| TcCLB.510885.50  | hypothetical protein, conserved                         | -0,6341 | 6,454E-06  |
| TcCLB.510659.4   | hypothetical protein, conserved                         | -0,6342 | 4,719E-06  |
| TcCLB.507547.9   | mucin TcMUCL, putative                                  | -0,6346 | 6,579E-06  |
| TcCLB.511003.130 | hypothetical protein, conserved                         | -0,635  | 0,00001967 |
| TcCLB.509735.140 | trans-sialidase (pseudogene), putative                  | -0,6352 | 1,888E-06  |
| TcCLB.508907.10  | hypothetical protein, conserved                         | -0,6352 | 5,098E-06  |
| TcCLB.508355.230 | hypothetical protein                                    | -0,6354 | 0,0001489  |
| TcCLB.508407.4   | hypothetical protein, conserved                         | -0,6355 | 0,01167    |
| TcCLB.510885.160 | hypothetical protein, conserved                         | -0,6356 | 4,603E-16  |
| TcCLB.510293.70  | ribonuclease H, putative                                | -0,6357 | 0,00006494 |
| TcCLB.508859.10  | hypothetical protein, conserved                         | -0,6359 | 7,561E-07  |
| TcCLB.511423.160 | RWD domain-containing protein                           | -0,6359 | 5,908E-06  |
| TcCLB.507895.10  | trans-sialidase (pseudogene), putative                  | -0,636  | 0,1417     |
| TcCLB.510223.5   | guanine nucleotide exchange factor subunit GCD2         | -0,6366 | 0,03896    |
| TcCLB.508707.140 | phosphatidate cytidyltransferase-like protein, putative | -0,6371 | 5,725E-08  |
| TcCLB.509429.190 | hypothetical protein, conserved                         | -0,6375 | 4,67E-14   |
| TcCLB.508075.14  | hypothetical protein, conserved                         | -0,6379 | 6,286E-08  |
| TcCLB.511529.150 | hypothetical protein, conserved                         | -0,6382 | 1,733E-10  |
| TcCLB.508985.10  | mucin-associated surface protein (MASP, pseudogene), pu | -0,6382 | 0,000433   |
| TcCLB.511283.130 | MEKK-related kinase 1, putative (MRK1)                  | -0,6386 | 3,906E-11  |
| TcCLB.503455.10  | chaperone DNAJ protein, putative                        | -0,6387 | 4,093E-07  |
| TcCLB.508695.20  | phosphatidylinositol 4-kinase, putative                 | -0,6389 | 2,827E-10  |
| TcCLB.511637.9   | zinc carboxypeptidase, putative                         | -0,639  | 2,142E-12  |
| TcCLB.509007.14  | hypothetical protein, conserved                         | -0,6392 | 1,31E-08   |
| TcCLB.510131.20  | hypothetical protein, conserved                         | -0,6395 | 0,00007864 |
| TcCLB.505555.61  | cytoplasmic l-asparaginase i-like protein, putative     | -0,6396 | 0,0002665  |
| TcCLB.511827.125 | trans-sialidase (pseudogene), putative                  | -0,6397 | 0,0009959  |
| TcCLB.510593.10  | hypothetical protein, conserved                         | -0,6397 | 0,001778   |

|                  |                                                         |         |            |
|------------------|---------------------------------------------------------|---------|------------|
| TcCLB.507027.59  | pre-mRNA cleavage complex II Clp1 protein, putative     | -0,6401 | 2,091E-08  |
| TcCLB.507093.330 | hypothetical protein, conserved                         | -0,6401 | 0,0000126  |
| TcCLB.511173.190 | trans-sialidase (pseudogene), putative                  | -0,6401 | 0,01074    |
| TcCLB.511355.50  | glycerol uptake protein, putative                       | -0,6402 | 4,351E-09  |
| TcCLB.506691.50  | hypothetical protein, conserved                         | -0,6402 | 1,101E-08  |
| TcCLB.507803.49  | histone deacetylase, putative                           | -0,6402 | 0,0007141  |
| TcCLB.509795.50  | hypothetical protein, conserved                         | -0,6407 | 5,849E-14  |
| TcCLB.507939.30  | hypothetical protein, conserved                         | -0,6411 | 1,555E-08  |
| TcCLB.511281.30  | RNA-binding protein 27, putative (RBP27)                | -0,6415 | 3,258E-09  |
| TcCLB.509991.90  | RNA-editing nuclease 1 (KREN1)                          | -0,6416 | 1,627E-09  |
| TcCLB.511711.110 | TLR4 regulator and MIR-interacting MSAP, putative (ESP1 | -0,6416 | 2,392E-08  |
| TcCLB.510889.190 | hypothetical protein, conserved                         | -0,6417 | 4,094E-09  |
| TcCLB.510115.10  | trans-sialidase (pseudogene), putative                  | -0,6417 | 0,00002102 |
| TcCLB.503449.40  | hypothetical protein, conserved                         | -0,6422 | 2,591E-06  |
| TcCLB.504431.40  | hypothetical protein, conserved                         | -0,6423 | 6,17E-09   |
| TcCLB.511277.560 | synaptotagmin, putative                                 | -0,6425 | 2,583E-07  |
| TcCLB.506211.259 | hypothetical protein, conserved                         | -0,6427 | 5,056E-06  |
| TcCLB.505063.30  | mucin-associated surface protein (MASP, pseudogene), pi | -0,6428 | 2,417E-07  |
| TcCLB.506955.226 | elongation factor 1-gamma (EF-1-gamma, pseudogene),     | -0,6428 | 0,1508     |
| TcCLB.504069.4   | hypothetical protein, conserved (fragment)              | -0,643  | 2,246E-07  |
| TcCLB.508221.130 | mucin TcMUCII (pseudogene), putative                    | -0,643  | 0,05648    |
| TcCLB.504147.310 | hypothetical protein, conserved                         | -0,6431 | 7,38E-12   |
| TcCLB.510407.70  | hypothetical protein                                    | -0,6434 | 4,212E-10  |
| TcCLB.508221.920 | mucin-associated surface protein (MASP, pseudogene), pi | -0,6434 | 0,0005788  |
| TcCLB.503637.10  | hypothetical protein, conserved                         | -0,6435 | 1,807E-06  |
| TcCLB.511411.8   | hypothetical protein, conserved (fragment)              | -0,6435 | 0,0001759  |
| TcCLB.508293.27  | mucin-associated surface protein (MASP, pseudogene), pi | -0,6438 | 0,08708    |
| TcCLB.504207.29  | hypothetical protein, conserved                         | -0,644  | 2,578E-07  |
| TcCLB.509999.10  | hypothetical protein, conserved                         | -0,644  | 3,926E-06  |
| TcCLB.506605.139 | hypothetical protein, conserved                         | -0,644  | 8,634E-06  |
| TcCLB.506131.50  | hypothetical protein                                    | -0,6444 | 0,2073     |
| TcCLB.506727.110 | hypothetical protein, conserved                         | -0,6445 | 1,202E-09  |
| TcCLB.511339.30  | UDP-Gal or UDP-GlcNAc-dependent glycosyltransferase, p  | -0,6445 | 0,001287   |
| TcCLB.510131.50  | DNA polymerase kappa, putative                          | -0,6448 | 1,863E-07  |
| TcCLB.472833.10  | hypothetical protein, conserved                         | -0,6451 | 0,06201    |
| TcCLB.508601.40  | hypothetical protein, conserved                         | -0,6452 | 1,456E-06  |
| TcCLB.508231.60  | ubiquitin-protein ligase, putative                      | -0,6454 | 3,237E-21  |
| TcCLB.507967.10  | hypothetical protein                                    | -0,6454 | 1,014E-09  |
| TcCLB.510105.140 | hypothetical protein, conserved (pseudogene)            | -0,6459 | 4,724E-09  |
| TcCLB.504787.40  | trans-sialidase, Group V, putative                      | -0,6459 | 0,03724    |
| TcCLB.506725.50  | hypothetical protein, conserved                         | -0,6461 | 2,563E-08  |
| TcCLB.508989.20  | carrier protein, putative                               | -0,6461 | 4,778E-08  |
| TcCLB.504093.4   | hypothetical protein, conserved                         | -0,6461 | 0,00007783 |
| TcCLB.511837.138 | RNA-binding protein, putative                           | -0,6466 | 3,214E-13  |
| TcCLB.508979.90  | hypothetical protein                                    | -0,6466 | 2,575E-06  |

|                  |                                                                                    |         |            |
|------------------|------------------------------------------------------------------------------------|---------|------------|
| TcCLB.511015.30  | Trichohyalin, putative (fragment)                                                  | -0,6469 | 2,397E-13  |
| TcCLB.508613.20  | hypothetical protein, conserved                                                    | -0,6469 | 1,913E-07  |
| TcCLB.510125.10  | pumilio/PUF RNA binding protein 6, putative (PUF6)                                 | -0,6472 | 4,557E-10  |
| TcCLB.504625.20  | hypothetical protein, conserved                                                    | -0,6472 | 5,624E-08  |
| TcCLB.506251.50  | Cell division control protein 48, putative                                         | -0,6472 | 2,324E-06  |
| TcCLB.511213.30  | surface protease GP63 (pseudogene), putative                                       | -0,6472 | 0,0002627  |
| TcCLB.503797.10  | hypothetical protein, conserved                                                    | -0,6475 | 0,00008113 |
| TcCLB.506559.524 | protein phosphatase 2C, putative                                                   | -0,6476 | 2,882E-08  |
| TcCLB.511383.10  | hypothetical protein, conserved                                                    | -0,6476 | 0,0001473  |
| TcCLB.508871.51  | serine-alanine-and proline-rich protein (pseudogene), putative                     | -0,6478 | 0,0004585  |
| TcCLB.508533.20  | hypothetical protein, conserved                                                    | -0,6479 | 2,348E-08  |
| TcCLB.510993.19  | hypothetical protein                                                               | -0,648  | 0,0004359  |
| TcCLB.506363.140 | hypothetical protein, conserved                                                    | -0,6481 | 3,661E-06  |
| TcCLB.507077.60  | surface protease GP63, putative                                                    | -0,6482 | 5,831E-07  |
| TcCLB.503395.59  | hypothetical protein, conserved (fragment)                                         | -0,6482 | 0,002288   |
| TcCLB.507389.20  | hypothetical protein, conserved                                                    | -0,6485 | 0,00004623 |
| TcCLB.510187.404 | dolichyl-P-Man:GDP-Man5GlcNAc2-PP-dolichyl alpha-1,3-glucosyltransferase, putative | -0,6486 | 3,696E-08  |
| TcCLB.508777.10  | hypothetical protein, conserved                                                    | -0,6488 | 1,047E-11  |
| TcCLB.506755.130 | hypothetical protein, conserved                                                    | -0,649  | 0,0000511  |
| TcCLB.511167.110 | hypothetical protein, conserved                                                    | -0,6493 | 6,366E-10  |
| TcCLB.427743.9   | translation initiation factor eIF2B delta subunit, putative (fragment)             | -0,6494 | 0,0001759  |
| TcCLB.508777.20  | hypothetical protein, conserved                                                    | -0,6496 | 8,034E-06  |
| TcCLB.510955.60  | hypothetical protein, conserved                                                    | -0,6497 | 3,335E-09  |
| TcCLB.506447.19  | hypothetical protein, conserved                                                    | -0,6497 | 6,161E-09  |
| TcCLB.508933.50  | hypothetical protein, conserved                                                    | -0,6499 | 1,238E-07  |
| TcCLB.509965.260 | protein kinase, putative                                                           | -0,6501 | 4,929E-11  |
| TcCLB.511727.260 | cyclin 9, putative (CYC9)                                                          | -0,6506 | 6,934E-06  |
| TcCLB.510823.80  | cytoplasmic l-asparaginase i-like protein, putative                                | -0,6509 | 4,722E-06  |
| TcCLB.508887.5   | trans-sialidase, putative                                                          | -0,651  | 0,1488     |
| TcCLB.504069.140 | trans-sialidase (pseudogene), putative                                             | -0,6511 | 0,00001239 |
| TcCLB.506289.240 | hypothetical protein                                                               | -0,6511 | 0,03441    |
| TcCLB.507547.50  | hypothetical protein, conserved                                                    | -0,6512 | 2,203E-10  |
| TcCLB.503417.40  | hypothetical protein                                                               | -0,6512 | 0,08241    |
| TcCLB.510731.30  | hypothetical protein, conserved                                                    | -0,6514 | 3,773E-11  |
| TcCLB.511801.20  | hypothetical protein, conserved                                                    | -0,6515 | 6,081E-08  |
| TcCLB.503829.70  | hypothetical protein, conserved                                                    | -0,6516 | 2,353E-12  |
| TcCLB.508731.9   | hypothetical protein, conserved (fragment)                                         | -0,6516 | 6,758E-09  |
| TcCLB.508061.130 | trans-sialidase (pseudogene), putative                                             | -0,6519 | 1,047E-12  |
| TcCLB.449247.4   | serine/threonine protein phosphatase, putative (fragment)                          | -0,6522 | 1,217E-08  |
| TcCLB.511151.39  | hypothetical protein, conserved                                                    | -0,6523 | 7,411E-08  |
| TcCLB.506955.130 | trans-sialidase (pseudogene), putative                                             | -0,6525 | 0,00216    |
| TcCLB.506751.148 | mucin TcMUCII (pseudogene), putative                                               | -0,6528 | 0,1158     |
| TcCLB.508315.5   | mucin TcMUCII, putative (fragment)                                                 | -0,6529 | 0,1012     |
| TcCLB.511537.24  | hypothetical protein, conserved                                                    | -0,6532 | 1,145E-09  |
| TcCLB.506673.20  | hypothetical protein, conserved                                                    | -0,6535 | 0,0002367  |

|                  |                                                               |         |            |
|------------------|---------------------------------------------------------------|---------|------------|
| TcCLB.510057.20  | hypothetical protein, conserved                               | -0,6538 | 0,000197   |
| TcCLB.509399.160 | CCR4-NOT transcription complex subunit 2, putative            | -0,6541 | 2,412E-11  |
| TcCLB.510407.80  | hypothetical protein, conserved                               | -0,6542 | 9,865E-14  |
| TcCLB.510021.185 | hypothetical protein                                          | -0,6545 | 0,05106    |
| TcCLB.398345.10  | hypothetical protein, conserved                               | -0,655  | 8,284E-10  |
| TcCLB.506813.190 | trans-sialidase, Group VI, putative                           | -0,6553 | 0,002303   |
| TcCLB.506617.70  | variant-surface-glycoprotein phospholipase C (GPI-PLC)        | -0,6554 | 7,329E-06  |
| TcCLB.510443.30  | hypothetical protein, conserved                               | -0,6558 | 1,78E-10   |
| TcCLB.511655.60  | hypothetical protein, conserved                               | -0,656  | 0,0001028  |
| TcCLB.511867.30  | hypothetical protein, conserved                               | -0,6563 | 1,196E-06  |
| TcCLB.511127.250 | hypothetical protein, conserved                               | -0,6564 | 8,156E-08  |
| TcCLB.503471.19  | expression site-associated gene (ESAG-like) protein, putative | -0,6567 | 0,00001092 |
| TcCLB.510889.300 | hypothetical protein                                          | -0,657  | 1,181E-06  |
| TcCLB.510679.60  | lipase, putative                                              | -0,657  | 0,0008823  |
| TcCLB.511839.10  | mucin TcMUCII, putative                                       | -0,6573 | 0,0295     |
| TcCLB.510377.475 | hypothetical protein, conserved (pseudogene)                  | -0,6573 | 0,1969     |
| TcCLB.510431.310 | hypothetical protein, conserved                               | -0,6574 | 0,0008291  |
| TcCLB.511521.27  | hypothetical protein, conserved                               | -0,6575 | 8,921E-07  |
| TcCLB.509437.106 | trans-sialidase (pseudogene), putative                        | -0,6578 | 0,03034    |
| TcCLB.482369.20  | hypothetical protein, conserved                               | -0,6581 | 9,317E-16  |
| TcCLB.511409.40  | hypothetical protein, conserved                               | -0,6584 | 9,728E-11  |
| TcCLB.510385.5   | hypothetical protein, conserved (pseudogene)                  | -0,6588 | 0,00111    |
| TcCLB.508863.20  | hypothetical protein, conserved                               | -0,6593 | 0,00000136 |
| TcCLB.508257.130 | hypothetical protein, conserved                               | -0,6594 | 5,303E-08  |
| TcCLB.510969.10  | hypothetical protein, conserved                               | -0,6596 | 8,43E-08   |
| TcCLB.511383.30  | U1 small nuclear ribonucleoprotein, putative                  | -0,6598 | 2,363E-07  |
| TcCLB.511409.70  | hypothetical protein, conserved                               | -0,66   | 1,008E-09  |
| TcCLB.509699.210 | mucin-associated surface protein (MASP), putative             | -0,66   | 0,004214   |
| TcCLB.482369.10  | protein phosphatase 2A regulatory subunit, putative           | -0,6601 | 1,548E-12  |
| TcCLB.508387.150 | hypothetical protein                                          | -0,6605 | 1,339E-08  |
| TcCLB.503999.20  | Kinesin-13 5, putative (KIN13-5)                              | -0,6607 | 1,225E-14  |
| TcCLB.506829.50  | hypothetical protein, conserved                               | -0,6613 | 1,999E-08  |
| TcCLB.510609.110 | ATP-dependent RNA helicase, putative                          | -0,6613 | 8,733E-08  |
| TcCLB.507949.140 | ribosomal RNA-processing protein 8, putative (RRP8)           | -0,6623 | 1,558E-10  |
| TcCLB.511625.140 | mucin-associated surface protein (MASP, pseudogene), putative | -0,6623 | 0,00001785 |
| TcCLB.509791.150 | choline/ethanolamine phosphotransferase, putative (CEPT)      | -0,6626 | 3,233E-13  |
| TcCLB.511127.210 | hypothetical protein, conserved                               | -0,6628 | 0,00001767 |
| TcCLB.509733.180 | adenylate kinase, putative                                    | -0,6628 | 0,00007076 |
| TcCLB.510431.140 | dual-specificity protein kinase, putative                     | -0,6631 | 6,625E-15  |
| TcCLB.510955.50  | hypothetical protein, conserved                               | -0,6631 | 0,00002797 |
| TcCLB.509779.60  | dual-specificity protein phosphatase, putative                | -0,6636 | 0,05555    |
| TcCLB.510667.14  | membrane transporter protein, putative                        | -0,6638 | 6,485E-10  |
| TcCLB.510955.30  | hypothetical protein, conserved                               | -0,6639 | 5,492E-11  |
| TcCLB.510889.150 | hypothetical protein, conserved                               | -0,664  | 0,00002046 |
| TcCLB.507669.139 | hypothetical protein, conserved                               | -0,6641 | 6,278E-07  |

|                  |                                                            |         |            |
|------------------|------------------------------------------------------------|---------|------------|
| TcCLB.511331.10  | calpain cysteine peptidase, putative (fragment)            | -0,6642 | 0,03996    |
| TcCLB.508313.60  | hypothetical protein                                       | -0,6642 | 0,2102     |
| TcCLB.511435.40  | hypothetical protein, conserved                            | -0,6644 | 3,438E-13  |
| TcCLB.509647.160 | SKP1-like protein                                          | -0,6644 | 2,523E-08  |
| TcCLB.504103.10  | hypothetical protein, conserved                            | -0,6645 | 9,998E-06  |
| TcCLB.510147.9   | hypothetical protein, conserved                            | -0,6645 | 0,0001244  |
| TcCLB.511127.280 | hypothetical protein, conserved                            | -0,6657 | 0,00000305 |
| TcCLB.506525.140 | MEKK-related kinase 1, putative (MRK1)                     | -0,666  | 9,627E-14  |
| TcCLB.509755.80  | mucin-associated surface protein (MASP, pseudogene), pi    | -0,6663 | 0,1252     |
| TcCLB.503967.4   | hypothetical protein, conserved                            | -0,6664 | 0,001429   |
| TcCLB.511727.210 | Repressor of differentiation kinase 1, putative (RDK1.1)   | -0,6666 | 1,31E-16   |
| TcCLB.503827.80  | syntaxin binding protein (pseudogene), putative            | -0,6671 | 0,004052   |
| TcCLB.503829.30  | hypothetical protein, conserved                            | -0,6675 | 1,709E-06  |
| TcCLB.511127.390 | hypothetical protein, conserved                            | -0,6676 | 1,259E-21  |
| TcCLB.507883.25  | hypothetical protein, conserved                            | -0,6676 | 0,006894   |
| TcCLB.507757.50  | serine/threonine-protein phosphatase PP1, putative         | -0,6679 | 3,002E-13  |
| TcCLB.511307.20  | Peptidase C19, ubiquitin carboxyl-terminal hydrolase, puta | -0,6679 | 2,26E-09   |
| TcCLB.511153.80  | hypothetical protein                                       | -0,6679 | 5,991E-07  |
| TcCLB.477983.10  | calpain cysteine peptidase, putative                       | -0,668  | 0,07708    |
| TcCLB.506871.30  | ADP-ribosylation factor GTPase activating protein 1, putat | -0,6681 | 3,442E-09  |
| TcCLB.508061.10  | hypothetical protein                                       | -0,6683 | 1,356E-07  |
| TcCLB.506341.40  | hypothetical protein                                       | -0,6684 | 0,02885    |
| TcCLB.508777.170 | hypothetical protein, conserved                            | -0,6689 | 5,516E-09  |
| TcCLB.506977.10  | dual specificity protein phosphatase, putative             | -0,6689 | 1,694E-06  |
| TcCLB.508893.40  | hypothetical protein, conserved (fragment)                 | -0,6689 | 0,006198   |
| TcCLB.508215.9   | protein kinase C substrate protein, heavy chain, putative  | -0,6693 | 1,173E-13  |
| TcCLB.503579.30  | DNA polymerase sigma-like protein, putative                | -0,6694 | 2,235E-09  |
| TcCLB.508507.20  | hypothetical protein, conserved                            | -0,6698 | 1,521E-10  |
| TcCLB.508221.870 | trans-sialidase, Group V, putative                         | -0,6699 | 0,001749   |
| TcCLB.509319.100 | hypothetical protein, conserved                            | -0,67   | 1,305E-09  |
| TcCLB.511313.10  | hypothetical protein, conserved                            | -0,6705 | 0,00005443 |
| TcCLB.509735.60  | trans-sialidase (pseudogene), putative                     | -0,6708 | 0,00004728 |
| TcCLB.511575.70  | kinetoplastid kinetochore protein 4, putative              | -0,6709 | 7,412E-10  |
| TcCLB.511099.160 | mucin TcMUCII, putative                                    | -0,6714 | 0,02459    |
| TcCLB.504151.39  | hypothetical protein, conserved                            | -0,6716 | 3,205E-11  |
| TcCLB.510747.60  | cytochrome P450 reductase, putative                        | -0,6716 | 8,489E-08  |
| TcCLB.508221.320 | mucin-associated surface protein (MASP, pseudogene), pi    | -0,6719 | 0,04645    |
| TcCLB.511557.29  | hypothetical protein                                       | -0,6724 | 5,697E-08  |
| TcCLB.508865.4   | protein phosphatase 2C, putative                           | -0,6725 | 5,149E-11  |
| TcCLB.506343.41  | trans-sialidase (pseudogene), putative                     | -0,6727 | 0,003978   |
| TcCLB.511083.35  | mucin TcMUCII (pseudogene), putative                       | -0,6734 | 0,01892    |
| TcCLB.511277.30  | hypothetical protein, conserved (pseudogene)               | -0,6741 | 3,107E-14  |
| TcCLB.503791.40  | dihydrouridine synthase, putative                          | -0,6742 | 0,0000138  |
| TcCLB.510303.40  | hypothetical protein                                       | -0,6746 | 3,847E-09  |
| TcCLB.510763.60  | hypothetical protein, conserved                            | -0,6749 | 1,552E-06  |

|                  |                                                             |         |            |
|------------------|-------------------------------------------------------------|---------|------------|
| TcCLB.510279.220 | mucin TcMUC (pseudogene), putative                          | -0,6755 | 0,06804    |
| TcCLB.508277.360 | ubiquitin hydrolase, putative                               | -0,6758 | 1,247E-15  |
| TcCLB.506681.70  | serine-threonine dehydratase, putative                      | -0,676  | 1,259E-06  |
| TcCLB.507611.190 | retrotransposon hot spot protein (RHS, pseudogene), puta    | -0,6761 | 0,001712   |
| TcCLB.506401.24  | hypothetical protein, conserved                             | -0,6765 | 5,313E-11  |
| TcCLB.507357.140 | hypothetical protein                                        | -0,6766 | 0,06001    |
| TcCLB.508247.19  | syntaxin binding protein 1 (pseudogene), putative           | -0,6767 | 0,02349    |
| TcCLB.510953.49  | lipase-like protein, putative                               | -0,677  | 4,688E-07  |
| TcCLB.509165.10  | trans-sialidase (pseudogene), putative                      | -0,6771 | 1,793E-07  |
| TcCLB.511389.10  | hypothetical protein, conserved                             | -0,6773 | 3,19E-07   |
| TcCLB.509545.25  | elongation factor 1-gamma (EF-1-gamma, pseudogene),         | -0,6774 | 0,1961     |
| TcCLB.506565.29  | hypothetical protein, conserved                             | -0,6775 | 0,00000338 |
| TcCLB.506425.80  | phosphatidylinositol kinase, putative                       | -0,6776 | 8,825E-10  |
| TcCLB.511401.24  | hypothetical protein, conserved (pseudogene)                | -0,6777 | 4,657E-06  |
| TcCLB.506791.60  | hypothetical protein, conserved                             | -0,6778 | 1,095E-13  |
| TcCLB.510657.130 | hypothetical protein, conserved                             | -0,6778 | 6,334E-08  |
| TcCLB.507517.130 | RNA editing 3' terminal uridylyl transferase 2, putative (R | -0,6782 | 7,492E-07  |
| TcCLB.506917.27  | hypothetical protein, conserved (pseudogene)                | -0,6784 | 0,0003739  |
| TcCLB.504249.100 | trans-sialidase (pseudogene), putative                      | -0,6787 | 0,00008737 |
| TcCLB.506247.260 | mitochondrial carrier protein, putative                     | -0,6789 | 0,00003442 |
| TcCLB.506811.200 | hypothetical protein, conserved                             | -0,679  | 1,244E-07  |
| TcCLB.509157.210 | hypothetical protein, conserved                             | -0,679  | 0,00007388 |
| TcCLB.511611.11  | hypothetical protein                                        | -0,679  | 0,004093   |
| TcCLB.509561.100 | hypothetical protein, conserved                             | -0,6794 | 2,685E-13  |
| TcCLB.506435.180 | hypothetical protein, conserved                             | -0,6795 | 2,183E-06  |
| TcCLB.506279.220 | mucin-associated surface protein (MASP, pseudogene), pi     | -0,6797 | 0,0003305  |
| TcCLB.511291.50  | hypothetical protein, conserved                             | -0,68   | 0,00001825 |
| TcCLB.508405.20  | TBC1 domain family member 20/GTPase, putative               | -0,6803 | 1,807E-06  |
| TcCLB.506297.170 | hypothetical protein, conserved                             | -0,6804 | 9,161E-06  |
| TcCLB.507765.130 | hypothetical protein, conserved                             | -0,6805 | 8,678E-25  |
| TcCLB.509589.30  | Kinesin-13 5, putative (KIN13-5)                            | -0,6805 | 1,134E-16  |
| TcCLB.508777.90  | ATP-dependent DNA helicase, putative                        | -0,6805 | 3,539E-09  |
| TcCLB.511717.60  | hypothetical protein, conserved                             | -0,6809 | 3,092E-08  |
| TcCLB.506681.20  | hypothetical protein, conserved                             | -0,6811 | 2,549E-17  |
| TcCLB.508235.30  | mucin TcMUCI, putative                                      | -0,6812 | 1,144E-06  |
| TcCLB.506155.130 | hypothetical protein, conserved                             | -0,6813 | 0,002649   |
| TcCLB.507209.40  | cdc2-related kinase 9 (CRK9)                                | -0,6814 | 7,793E-17  |
| TcCLB.506367.50  | hypothetical protein, conserved                             | -0,6815 | 0,00001086 |
| TcCLB.508261.140 | elongation factor 1-gamma (EF-1-gamma), putative            | -0,6815 | 0,06744    |
| TcCLB.503561.10  | hypothetical protein, conserved                             | -0,6818 | 2,752E-06  |
| TcCLB.410199.40  | hypothetical protein                                        | -0,682  | 0,00508    |
| TcCLB.510889.100 | hypothetical protein, conserved                             | -0,6821 | 3,244E-10  |
| TcCLB.511603.356 | syntaxin binding protein (pseudogene), putative             | -0,6824 | 0,0745     |
| TcCLB.510237.60  | mucin TcMUCII, putative                                     | -0,6827 | 0,01765    |
| TcCLB.509595.60  | hypothetical protein, conserved                             | -0,6828 | 3,668E-08  |

|                  |                                                          |         |            |
|------------------|----------------------------------------------------------|---------|------------|
| TcCLB.506443.30  | hypothetical protein, conserved                          | -0,6831 | 2,252E-11  |
| TcCLB.506211.107 | hypothetical protein, conserved                          | -0,6833 | 0,00006238 |
| TcCLB.509641.20  | hypothetical protein, conserved                          | -0,6837 | 5,287E-06  |
| TcCLB.504131.130 | hypothetical protein, conserved                          | -0,6838 | 1,217E-11  |
| TcCLB.511127.160 | integral membrane transport protein, putative            | -0,6839 | 0,0207     |
| TcCLB.506287.170 | hypothetical protein, conserved                          | -0,684  | 1,6E-15    |
| TcCLB.506951.10  | retrotransposon hot spot protein (RHS, pseudogene), puta | -0,684  | 0,004513   |
| TcCLB.511039.3   | choline/ethanolamine phosphotransferase, putative (CEP1  | -0,6841 | 0,001978   |
| TcCLB.410199.4   | kinase, putative (fragment)                              | -0,6843 | 0,00001326 |
| TcCLB.506753.50  | hypothetical protein, conserved                          | -0,6846 | 6,116E-10  |
| TcCLB.508521.70  | mucin-associated surface protein (MASP, pseudogene), pu  | -0,685  | 0,0003992  |
| TcCLB.506413.60  | hypothetical protein, conserved                          | -0,6858 | 0,0005418  |
| TcCLB.511107.30  | hypothetical protein, conserved                          | -0,686  | 1,665E-13  |
| TcCLB.506247.330 | 2,3-bisphosphoglycerate-independent phosphoglycerate n   | -0,686  | 1,351E-08  |
| TcCLB.510979.30  | mucin TcMUCII (pseudogene), putative                     | -0,6863 | 0,0007057  |
| TcCLB.446067.9   | hypothetical protein, conserved (fragment)               | -0,6864 | 1,599E-09  |
| TcCLB.508795.10  | SNF2/RAD54 related DNA helicase (pseudogene), putative   | -0,6865 | 1,014E-06  |
| TcCLB.508873.130 | hypothetical protein                                     | -0,6865 | 0,07273    |
| TcCLB.505171.109 | Present in the outer mitochondrial membrane proteome 1   | -0,6867 | 0,003365   |
| TcCLB.508593.50  | hypothetical protein, conserved                          | -0,6869 | 5,872E-13  |
| TcCLB.412419.10  | mucin-associated surface protein (MASP, pseudogene), pu  | -0,6874 | 0,01622    |
| TcCLB.507805.9   | histone deacetylase 4, putative                          | -0,6876 | 0,000329   |
| TcCLB.509553.40  | ribonuclease mar1, putative                              | -0,6878 | 8,231E-07  |
| TcCLB.507723.41  | trans-sialidase (pseudogene), putative                   | -0,6878 | 0,0009522  |
| TcCLB.506195.260 | hypothetical protein                                     | -0,6891 | 4,18E-11   |
| TcCLB.507427.10  | trans-sialidase, Group I, putative                       | -0,6892 | 4,096E-09  |
| TcCLB.509973.80  | hypothetical protein                                     | -0,6892 | 0,0007617  |
| TcCLB.508307.20  | hypothetical protein, conserved                          | -0,6893 | 4,817E-09  |
| TcCLB.507895.100 | hypothetical protein, conserved (pseudogene)             | -0,6896 | 1,762E-08  |
| TcCLB.508291.71  | hypothetical protein                                     | -0,6896 | 0,001697   |
| TcCLB.506835.60  | calmodulin, putative                                     | -0,6904 | 0,0002805  |
| TcCLB.507641.180 | endochitinase, putative                                  | -0,6907 | 6,675E-06  |
| TcCLB.511367.180 | hypothetical protein                                     | -0,691  | 1,68E-16   |
| TcCLB.507633.90  | hypothetical protein                                     | -0,691  | 0,01962    |
| TcCLB.511127.180 | hypothetical protein, conserved                          | -0,6911 | 3,167E-13  |
| TcCLB.506231.40  | retrotransposon hot spot protein (RHS, pseudogene), puta | -0,6911 | 6,346E-07  |
| TcCLB.507765.50  | hypothetical protein, conserved                          | -0,6912 | 2,633E-10  |
| TcCLB.507609.70  | hypothetical protein, conserved                          | -0,6912 | 0,0004161  |
| TcCLB.511765.10  | trans-sialidase (pseudogene), putative                   | -0,6912 | 0,004824   |
| TcCLB.509647.190 | hypothetical protein, conserved                          | -0,6916 | 1,246E-13  |
| TcCLB.508817.30  | hypothetical protein                                     | -0,6917 | 2,685E-10  |
| TcCLB.508771.50  | hypothetical protein, conserved                          | -0,692  | 1,493E-11  |
| TcCLB.509065.40  | hypothetical protein, conserved                          | -0,6928 | 2,555E-09  |
| TcCLB.505363.15  | elongation factor 1-gamma (EF-1-gamma, pseudogene),      | -0,6929 | 0,003055   |
| TcCLB.510725.80  | hypothetical protein                                     | -0,6934 | 4,261E-09  |

|                  |                                                           |         |            |
|------------------|-----------------------------------------------------------|---------|------------|
| TcCLB.506475.40  | MORN repeat-containing protein                            | -0,6938 | 1,135E-16  |
| TcCLB.504125.70  | hypothetical protein, conserved                           | -0,6941 | 2,898E-07  |
| TcCLB.506393.189 | retrotransposon hot spot (RHS) protein, putative (fragmer | -0,6943 | 0,0001986  |
| TcCLB.511523.80  | hypothetical protein, conserved                           | -0,6944 | 2,819E-12  |
| TcCLB.509649.59  | hypothetical protein, conserved                           | -0,6947 | 5,831E-11  |
| TcCLB.508005.20  | trans-sialidase (pseudogene), putative                    | -0,6948 | 0,05871    |
| TcCLB.510557.40  | hypothetical protein                                      | -0,6951 | 0,00003238 |
| TcCLB.507757.21  | hypothetical protein, conserved                           | -0,6954 | 0,00006553 |
| TcCLB.506625.35  | trans-sialidase (pseudogene), putative                    | -0,6954 | 0,01144    |
| TcCLB.508731.60  | adenylosuccinate synthetase, putative                     | -0,6956 | 7,259E-10  |
| TcCLB.510693.260 | trans-sialidase (pseudogene), putative                    | -0,6956 | 0,01329    |
| TcCLB.506737.107 | mucin-associated surface protein (MASP, pseudogene), pi   | -0,696  | 2,482E-06  |
| TcCLB.507087.70  | hypothetical protein, conserved                           | -0,6969 | 2,542E-14  |
| TcCLB.511183.381 | syntaxin binding protein 1, (pseudogene), putative        | -0,6975 | 0,006781   |
| TcCLB.506721.10  | hypothetical protein, conserved (fragment)                | -0,6981 | 0,0004397  |
| TcCLB.506885.30  | hypothetical protein, conserved                           | -0,6987 | 2,813E-08  |
| TcCLB.509453.20  | hypothetical protein, conserved                           | -0,6988 | 0,0001048  |
| TcCLB.510769.202 | trans-sialidase (pseudogene), putative                    | -0,6991 | 0,01585    |
| TcCLB.510239.40  | mucin-associated surface protein (MASP, pseudogene), pi   | -0,6993 | 0,002382   |
| TcCLB.507065.89  | mucin TcMUC (pseudogene), putative                        | -0,6993 | 0,007863   |
| TcCLB.503559.80  | hypothetical protein                                      | -0,6994 | 5,706E-11  |
| TcCLB.509773.9   | protein kinase, putative                                  | -0,6997 | 1,115E-07  |
| TcCLB.509577.9   | hypothetical protein, conserved (fragment)                | -0,7    | 2,475E-07  |
| TcCLB.511467.30  | hypothetical protein, conserved                           | -0,7002 | 1,644E-07  |
| TcCLB.420369.20  | trans-sialidase (pseudogene), putative                    | -0,7002 | 0,0001026  |
| TcCLB.506227.130 | calpain-like cysteine peptidase, putative                 | -0,7011 | 1,413E-15  |
| TcCLB.507615.120 | hypothetical protein, conserved                           | -0,7015 | 1,311E-07  |
| TcCLB.505983.40  | hypothetical protein, conserved                           | -0,7019 | 5,498E-22  |
| TcCLB.509835.10  | hypothetical protein, conserved                           | -0,7019 | 0,009291   |
| TcCLB.504109.50  | hypothetical protein, conserved                           | -0,7021 | 6,431E-10  |
| TcCLB.508365.171 | elongation factor 1-gamma (EF-1-gamma, pseudogene),       | -0,7022 | 0,03202    |
| TcCLB.511653.60  | hypothetical protein, conserved                           | -0,7025 | 7,26E-08   |
| TcCLB.509753.90  | trans-sialidase (pseudogene), putative                    | -0,7025 | 4,284E-06  |
| TcCLB.510143.110 | hypothetical protein, conserved                           | -0,7026 | 8,833E-11  |
| TcCLB.506605.190 | hypothetical protein, conserved                           | -0,7027 | 2,343E-10  |
| TcCLB.511159.14  | hypothetical protein, conserved                           | -0,7028 | 1,777E-14  |
| TcCLB.506755.210 | hypothetical protein, conserved                           | -0,7032 | 6,588E-08  |
| TcCLB.506725.60  | hypothetical protein, conserved                           | -0,7032 | 0,00001789 |
| TcCLB.506781.10  | mucin TcMUCII, putative                                   | -0,7034 | 0,04234    |
| TcCLB.510689.80  | hypothetical protein, conserved                           | -0,7035 | 3,482E-07  |
| TcCLB.511607.60  | trans-sialidase (pseudogene), putative                    | -0,7037 | 0,00001719 |
| TcCLB.504011.30  | surface protease GP63 (pseudogene), putative              | -0,7039 | 0,01591    |
| TcCLB.511277.200 | RNA-binding protein, putative                             | -0,7039 | 0,1203     |
| TcCLB.506757.70  | retrotransposon hot spot protein (RHS, pseudogene), puta  | -0,704  | 0,01       |
| TcCLB.511337.30  | UDP-Gal or UDP-GlcNAc-dependent glycosyltransferase, p    | -0,7043 | 0,005929   |



|                  |                                                               |         |            |
|------------------|---------------------------------------------------------------|---------|------------|
| TcCLB.507485.45  | hypothetical protein, conserved                               | -0,7049 | 0,00002586 |
| TcCLB.506605.70  | hypothetical protein, conserved                               | -0,7051 | 2,418E-14  |
| TcCLB.509693.40  | hypothetical protein, conserved                               | -0,7055 | 4,718E-06  |
| TcCLB.506297.180 | beta-adaptin 1, putative                                      | -0,7056 | 7,102E-16  |
| TcCLB.508739.11  | trans-sialidase (pseudogene), putative                        | -0,7056 | 0,0004577  |
| TcCLB.511861.14  | trans-sialidase (pseudogene), putative                        | -0,7058 | 1,065E-06  |
| TcCLB.508247.30  | hypothetical protein, conserved                               | -0,706  | 0,05942    |
| TcCLB.507025.60  | RNA-binding protein, putative                                 | -0,7073 | 0,01735    |
| TcCLB.508543.180 | hypothetical protein, conserved                               | -0,7075 | 5,828E-14  |
| TcCLB.506475.30  | hypothetical protein, conserved                               | -0,7078 | 1,136E-15  |
| TcCLB.511159.7   | neurobeachin/beige protein, putative                          | -0,7082 | 1,987E-11  |
| TcCLB.510269.73  | hypothetical protein, conserved (pseudogene)                  | -0,7082 | 0,00006033 |
| TcCLB.506757.100 | retrotransposon hot spot protein (RHS, pseudogene), puta      | -0,7084 | 0,00008885 |
| TcCLB.504247.40  | RNA-editing nuclease 1 (KREN1)                                | -0,7085 | 1,712E-09  |
| TcCLB.506629.160 | hypothetical protein, conserved                               | -0,7086 | 0,00001092 |
| TcCLB.510359.680 | mucin-associated surface protein (MASP, pseudogene), pi       | -0,7091 | 0,03872    |
| TcCLB.508277.100 | cAMP specific phosphodiesterase, putative                     | -0,7095 | 9,194E-07  |
| TcCLB.503775.41  | hypothetical protein, conserved (pseudogene)                  | -0,7108 | 0,01862    |
| TcCLB.507061.10  | hypothetical protein                                          | -0,7112 | 2,803E-06  |
| TcCLB.503677.4   | hypothetical protein, conserved                               | -0,7113 | 0,0328     |
| TcCLB.508677.30  | trans-sialidase (pseudogene), putative                        | -0,7117 | 6,864E-06  |
| TcCLB.510231.10  | eukaryotic translation initiation factor 2-alpha kinase, puti | -0,7118 | 9,94E-08   |
| TcCLB.508247.100 | hypothetical protein (pseudogene)                             | -0,7118 | 0,002825   |
| TcCLB.506959.100 | GTP-ase activating protein, putative                          | -0,7123 | 8,148E-10  |
| TcCLB.506057.40  | trans-sialidase (pseudogene), putative                        | -0,7131 | 6,775E-08  |
| TcCLB.506135.80  | hypothetical protein, conserved                               | -0,7142 | 4,441E-06  |
| TcCLB.510359.580 | mucin TcMUCII, putative                                       | -0,7146 | 0,07002    |
| TcCLB.511337.20  | UDP-Gal or UDP-GlcNAc-dependent glycosyltransferase, p        | -0,7147 | 0,02211    |
| TcCLB.511779.10  | trans-sialidase, putative                                     | -0,7152 | 0,08697    |
| TcCLB.510025.250 | trans-sialidase (pseudogene), putative                        | -0,7153 | 0,00007647 |
| TcCLB.506667.140 | hypothetical protein                                          | -0,7153 | 0,04239    |
| TcCLB.506265.190 | hypothetical protein, conserved                               | -0,7155 | 1,122E-10  |
| TcCLB.508289.94  | hypothetical protein, conserved (pseudogene)                  | -0,7156 | 0,08369    |
| TcCLB.507949.150 | conserved protein, unknown function                           | -0,7159 | 2,962E-15  |
| TcCLB.511417.50  | hypothetical protein                                          | -0,7168 | 2,032E-06  |
| TcCLB.503809.68  | glycerol uptake protein (pseudogene), putative                | -0,717  | 0,001055   |
| TcCLB.507547.18  | mucin TcMUCI, putative                                        | -0,7172 | 0,05399    |
| TcCLB.508209.50  | hypothetical protein, conserved                               | -0,7173 | 4,413E-06  |
| TcCLB.506825.160 | hypothetical protein, conserved                               | -0,7175 | 1,15E-07   |
| TcCLB.509451.50  | hypothetical protein, conserved                               | -0,7181 | 1,049E-15  |
| TcCLB.506267.39  | mucin-associated surface protein (MASP, pseudogene), pi       | -0,7181 | 0,0000199  |
| TcCLB.505999.140 | Metal-binding domain-containing protein                       | -0,7183 | 6,815E-11  |
| TcCLB.510197.10  | trans-sialidase (pseudogene), putative                        | -0,7185 | 9,218E-10  |
| TcCLB.503635.20  | hypothetical protein, conserved                               | -0,7192 | 1,862E-11  |
| TcCLB.504153.150 | Unc104-like kinesin, putative                                 | -0,7193 | 4,207E-18  |

|                  |                                                            |         |            |
|------------------|------------------------------------------------------------|---------|------------|
| TcCLB.504199.30  | kinesin-like protein, putative                             | -0,7193 | 2,34E-12   |
| TcCLB.511027.20  | hypothetical protein, conserved                            | -0,7193 | 4,853E-11  |
| TcCLB.507765.10  | hypothetical protein, conserved                            | -0,7193 | 0,00004    |
| TcCLB.508175.260 | inorganic polyphosphate/ATP-NAD kinase, putative           | -0,7196 | 1,38E-17   |
| TcCLB.506755.170 | hypothetical protein, conserved                            | -0,7201 | 1,729E-16  |
| TcCLB.510013.59  | trans-sialidase (pseudogene), putative                     | -0,721  | 0,03349    |
| TcCLB.506297.70  | hypothetical protein, conserved                            | -0,7211 | 6,051E-18  |
| TcCLB.506107.10  | hypothetical protein, conserved                            | -0,7211 | 1,401E-12  |
| TcCLB.509631.45  | hypothetical protein, conserved (pseudogene)               | -0,7211 | 0,0009227  |
| TcCLB.508707.30  | hypothetical protein, conserved                            | -0,7212 | 2,726E-18  |
| TcCLB.511797.215 | hypothetical protein, conserved (pseudogene)               | -0,7212 | 0,0003042  |
| TcCLB.503643.20  | cyclic nucleotide-binding domain containing protein, putat | -0,7213 | 1,745E-14  |
| TcCLB.508633.10  | trans-sialidase (pseudogene), putative                     | -0,7214 | 0,01246    |
| TcCLB.506407.90  | hypothetical protein, conserved                            | -0,7216 | 4,631E-25  |
| TcCLB.511257.30  | ras-related protein rab, putative                          | -0,7218 | 8,242E-08  |
| TcCLB.503693.20  | hypothetical protein, conserved                            | -0,7219 | 6,243E-07  |
| TcCLB.508205.30  | protein kinase, putative                                   | -0,722  | 2,48E-14   |
| TcCLB.504213.90  | inositol polyphosphate kinase-like protein, putative       | -0,7221 | 0,006615   |
| TcCLB.508175.170 | hypothetical protein, conserved                            | -0,7222 | 1,924E-15  |
| TcCLB.504105.140 | enolase                                                    | -0,7226 | 5,102E-12  |
| TcCLB.511755.10  | hypothetical protein, conserved                            | -0,7227 | 1,316E-06  |
| TcCLB.425839.10  | kinesin, putative                                          | -0,7232 | 2,989E-06  |
| TcCLB.508799.180 | hypothetical protein, conserved                            | -0,7233 | 5,767E-16  |
| TcCLB.504105.87  | hypothetical protein, conserved                            | -0,7236 | 9,58E-08   |
| TcCLB.508175.200 | hypothetical protein, conserved                            | -0,7239 | 4,588E-08  |
| TcCLB.508427.30  | surface protease GP63 (pseudogene), putative               | -0,7239 | 0,01127    |
| TcCLB.507357.10  | surface protease GP63, putative                            | -0,7245 | 0,01417    |
| TcCLB.510889.320 | hypothetical protein, conserved                            | -0,7249 | 2,28E-15   |
| TcCLB.506831.20  | amino acid permease, putative                              | -0,7251 | 6,78E-07   |
| TcCLB.504839.70  | hypothetical protein, conserved                            | -0,7255 | 9,941E-20  |
| TcCLB.507023.124 | hypothetical protein, conserved                            | -0,7258 | 0,0001012  |
| TcCLB.509753.220 | mucin TcMUCII, putative                                    | -0,7262 | 0,0414     |
| TcCLB.509767.140 | hypothetical protein                                       | -0,7263 | 2,679E-12  |
| TcCLB.510149.40  | hypothetical protein, conserved                            | -0,7265 | 9,757E-11  |
| TcCLB.511795.10  | hypothetical protein, conserved (pseudogene)               | -0,7268 | 0,003563   |
| TcCLB.503759.30  | trans-sialidase, putative                                  | -0,7268 | 0,01429    |
| TcCLB.507649.40  | hypothetical protein, conserved                            | -0,727  | 1,431E-08  |
| TcCLB.507665.10  | hypothetical protein, conserved                            | -0,7275 | 2,192E-09  |
| TcCLB.503997.10  | hypothetical protein, conserved                            | -0,7277 | 1,714E-07  |
| TcCLB.508989.60  | hypothetical protein, conserved                            | -0,7277 | 0,00003566 |
| TcCLB.508957.30  | hypothetical protein, conserved                            | -0,7278 | 5,222E-17  |
| TcCLB.509509.40  | hypothetical protein, conserved                            | -0,7279 | 0,00006449 |
| TcCLB.504197.15  | surface protease GP63 (pseudogene), putative               | -0,7279 | 0,01524    |
| TcCLB.510149.9   | hypothetical protein, conserved (fragment)                 | -0,7282 | 7,186E-09  |
| TcCLB.508523.80  | cAMP response protein 1 (CARP1)                            | -0,7286 | 6,139E-10  |

|                  |                                                          |         |            |
|------------------|----------------------------------------------------------|---------|------------|
| TcCLB.503833.20  | hypothetical protein, conserved                          | -0,7292 | 2,434E-16  |
| TcCLB.504787.70  | mucin-associated surface protein (MASP), putative        | -0,7292 | 0,0006739  |
| TcCLB.503693.11  | hypothetical protein, conserved (fragment)               | -0,7296 | 0,0003777  |
| TcCLB.508221.860 | mucin-associated surface protein (MASP, pseudogene), pu  | -0,7297 | 0,006889   |
| TcCLB.506247.380 | hypothetical protein, conserved                          | -0,7299 | 8,203E-11  |
| TcCLB.506737.135 | hypothetical protein, conserved (pseudogene)             | -0,7301 | 1,664E-09  |
| TcCLB.511167.70  | DNA repair and recombination helicase protein PIF2, puta | -0,7302 | 3,833E-06  |
| TcCLB.511173.40  | mucin TcMUCII (pseudogene), putative                     | -0,7303 | 0,02416    |
| TcCLB.510187.300 | hypothetical protein, conserved                          | -0,7308 | 4,441E-11  |
| TcCLB.506959.80  | hypothetical protein, conserved                          | -0,7313 | 8,927E-10  |
| TcCLB.505025.147 | hypothetical protein                                     | -0,7321 | 0,001769   |
| TcCLB.510747.110 | hypothetical protein, conserved                          | -0,7326 | 2,211E-08  |
| TcCLB.508039.50  | dispersed gene family protein 1 (DGF-1, pseudogene), put | -0,7326 | 0,00002069 |
| TcCLB.509121.10  | retrotransposon hot spot protein (RHS, pseudogene), puta | -0,7326 | 0,0003972  |
| TcCLB.511153.50  | haloacid dehalogenase hydrolase, putative                | -0,7332 | 6,19E-10   |
| TcCLB.509527.154 | mucin-associated surface protein (MASP, pseudogene), pu  | -0,7335 | 0,003385   |
| TcCLB.511189.20  | hypothetical protein, conserved                          | -0,7337 | 4,019E-11  |
| TcCLB.506825.40  | hypothetical protein, conserved                          | -0,7338 | 1,859E-06  |
| TcCLB.508221.400 | trans-sialidase, Group V, putative                       | -0,7344 | 0,01786    |
| TcCLB.511031.20  | hypothetical protein, conserved                          | -0,7353 | 1,573E-10  |
| TcCLB.511131.89  | hypothetical protein, conserved                          | -0,7353 | 0,00000168 |
| TcCLB.511865.30  | hypothetical protein, conserved                          | -0,7355 | 4,724E-08  |
| TcCLB.508153.364 | hypothetical protein, conserved                          | -0,7355 | 4,672E-07  |
| TcCLB.507771.40  | phosphoglycerate mutase, putative (iPGAM)                | -0,7357 | 3,329E-09  |
| TcCLB.511415.21  | trans-sialidase (pseudogene), putative                   | -0,7358 | 0,000331   |
| TcCLB.507939.40  | hypothetical protein, conserved                          | -0,7359 | 2,321E-07  |
| TcCLB.510361.260 | mucin-associated surface protein (MASP), putative        | -0,7365 | 0,03582    |
| TcCLB.506699.6   | hypothetical protein, conserved                          | -0,7367 | 0,00005802 |
| TcCLB.511771.40  | trans-sialidase (pseudogene), putative                   | -0,737  | 0,04652    |
| TcCLB.506329.59  | mucin-associated surface protein (MASP, pseudogene), pu  | -0,7376 | 0,0007716  |
| TcCLB.511217.170 | hypothetical protein, conserved                          | -0,7379 | 7,793E-10  |
| TcCLB.510891.40  | trans-sialidase (pseudogene), putative                   | -0,7379 | 4,857E-09  |
| TcCLB.509251.30  | trans-sialidase (pseudogene), putative                   | -0,7379 | 0,00004243 |
| TcCLB.508307.10  | hypothetical protein, conserved                          | -0,738  | 0,004164   |
| TcCLB.511483.60  | hypothetical protein, conserved                          | -0,7382 | 0,00126    |
| TcCLB.510327.20  | surface protease GP63 (pseudogene), putative             | -0,7385 | 0,000532   |
| TcCLB.506635.100 | ATP dependent DEAD-box helicase, putative (RH)           | -0,7389 | 4,418E-12  |
| TcCLB.510323.120 | kinesin, putative                                        | -0,7397 | 2,012E-10  |
| TcCLB.507443.53  | hypothetical protein                                     | -0,7397 | 0,001639   |
| TcCLB.510419.30  | hypothetical protein                                     | -0,7398 | 0,1345     |
| TcCLB.508949.30  | hypothetical protein, conserved                          | -0,74   | 1,976E-14  |
| TcCLB.511075.54  | hypothetical protein, conserved                          | -0,74   | 1,866E-09  |
| TcCLB.508207.220 | hypothetical protein, conserved                          | -0,7401 | 0,00004292 |
| TcCLB.510351.150 | phosphoprotein phosphatase, putative                     | -0,7403 | 3,487E-07  |
| TcCLB.510297.50  | hypothetical protein, conserved                          | -0,7408 | 1,451E-12  |

|                  |                                                            |         |            |
|------------------|------------------------------------------------------------|---------|------------|
| TcCLB.503685.5   | RNA-binding protein, putative (fragment)                   | -0,741  | 0,0223     |
| TcCLB.508641.320 | formin-like protein                                        | -0,7412 | 5,261E-17  |
| TcCLB.508837.70  | trans-sialidase, Group II, putative                        | -0,7413 | 3,923E-10  |
| TcCLB.510359.50  | hypothetical protein, conserved                            | -0,7413 | 0,00009896 |
| TcCLB.509549.15  | mucin TcMUCII (pseudogene), putative                       | -0,7417 | 0,02998    |
| TcCLB.506993.20  | mucin TcMUCI, putative                                     | -0,7417 | 0,05827    |
| TcCLB.503947.11  | surface protease GP63, putative (fragment)                 | -0,7418 | 0,01915    |
| TcCLB.509233.230 | hypothetical protein, conserved                            | -0,7419 | 3,514E-15  |
| TcCLB.506767.183 | mucin-associated surface protein (MASP, pseudogene), pi    | -0,7419 | 0,00008012 |
| TcCLB.511719.41  | hypothetical protein, conserved (fragment)                 | -0,7422 | 2,731E-10  |
| TcCLB.506717.20  | receptor-type adenylate cyclase, putative                  | -0,7423 | 3,026E-16  |
| TcCLB.508741.390 | hypothetical protein, conserved                            | -0,7423 | 2,611E-15  |
| TcCLB.505073.14  | hypothetical protein, conserved                            | -0,7426 | 2,657E-07  |
| TcCLB.506973.61  | hypothetical protein, conserved (pseudogene)               | -0,7429 | 0,0001388  |
| TcCLB.508347.60  | hypothetical protein, conserved                            | -0,7432 | 1,897E-07  |
| TcCLB.508735.10  | trans-sialidase (pseudogene), putative                     | -0,7434 | 6,834E-09  |
| TcCLB.506329.35  | hypothetical protein, conserved (pseudogene)               | -0,7438 | 0,1156     |
| TcCLB.510409.10  | protein kinase, putative                                   | -0,7443 | 0,0004511  |
| TcCLB.506319.50  | hypothetical protein, conserved                            | -0,7445 | 1,392E-13  |
| TcCLB.509819.10  | hypothetical protein, conserved                            | -0,7445 | 2,272E-12  |
| TcCLB.511167.50  | hypothetical protein, conserved                            | -0,7446 | 1,152E-12  |
| TcCLB.511911.71  | hypothetical protein, conserved                            | -0,7446 | 0,01911    |
| TcCLB.506469.50  | hypothetical protein, conserved                            | -0,7451 | 5,359E-06  |
| TcCLB.450155.9   | hypothetical protein, conserved                            | -0,746  | 1,238E-07  |
| TcCLB.510653.19  | hypothetical protein, conserved (fragment)                 | -0,7463 | 4,068E-11  |
| TcCLB.504427.10  | trypanothione synthetase, putative                         | -0,7465 | 5,595E-07  |
| TcCLB.511189.10  | hypothetical protein, conserved (pseudogene)               | -0,7467 | 7,294E-07  |
| TcCLB.503925.119 | protein kinase, putative                                   | -0,7469 | 4,132E-09  |
| TcCLB.509399.90  | hypothetical protein                                       | -0,7469 | 2,898E-08  |
| TcCLB.511735.88  | hypothetical protein, conserved (fragment)                 | -0,747  | 0,0003792  |
| TcCLB.504157.60  | hypothetical protein, conserved                            | -0,7472 | 3,36E-08   |
| TcCLB.506297.200 | inositol-1,4,5-trisphosphate (IP3) 5-phosphatase, putative | -0,7474 | 9,237E-17  |
| TcCLB.511127.350 | hypothetical protein, conserved                            | -0,7474 | 1,987E-14  |
| TcCLB.511733.30  | hypothetical protein, conserved                            | -0,748  | 1,564E-08  |
| TcCLB.509755.10  | trans-sialidase, Group V, putative                         | -0,748  | 0,001194   |
| TcCLB.507081.80  | hypothetical protein, conserved                            | -0,7481 | 1,145E-16  |
| TcCLB.506187.80  | trans-sialidase (pseudogene), putative                     | -0,7481 | 0,06601    |
| TcCLB.510737.60  | hypothetical protein, conserved                            | -0,7487 | 2,464E-11  |
| TcCLB.506457.80  | hypothetical protein, conserved                            | -0,7493 | 6,542E-13  |
| TcCLB.511375.30  | hypothetical protein (fragment)                            | -0,7494 | 0,026      |
| TcCLB.504233.10  | surface protease GP63, putative                            | -0,7495 | 0,00005939 |
| TcCLB.511173.340 | mucin TcMUCII (pseudogene), putative                       | -0,7497 | 0,0005603  |
| TcCLB.508265.70  | hypothetical protein, conserved                            | -0,7498 | 0,00000049 |
| TcCLB.508243.81  | syntaxin binding protein (pseudogene), putative            | -0,7504 | 0,002537   |
| TcCLB.448329.10  | trans-sialidase, putative                                  | -0,7504 | 0,06469    |

|                  |                                                            |         |            |
|------------------|------------------------------------------------------------|---------|------------|
| TcCLB.506321.340 | hypothetical protein, conserved                            | -0,7505 | 2,592E-10  |
| TcCLB.506203.80  | formin-like protein                                        | -0,7508 | 1,74E-11   |
| TcCLB.507959.224 | surface protease GP63 (pseudogene), putative               | -0,7508 | 0,02251    |
| TcCLB.509941.110 | condensin subunit 1, putative                              | -0,7518 | 1,089E-20  |
| TcCLB.509799.80  | hypothetical protein, conserved                            | -0,7518 | 5,217E-14  |
| TcCLB.505955.4   | mucin TcMUCII, putative (fragment)                         | -0,7521 | 0,001936   |
| TcCLB.509065.20  | mitogen-activated protein kinase 5, putative               | -0,7523 | 1,521E-06  |
| TcCLB.508409.300 | hypothetical protein, conserved                            | -0,7524 | 1,976E-09  |
| TcCLB.506241.60  | kinesin, putative                                          | -0,7525 | 1,843E-16  |
| TcCLB.510503.130 | mucin TcMUCII, putative                                    | -0,7533 | 0,04567    |
| TcCLB.511181.110 | hypothetical protein, conserved                            | -0,7546 | 8,597E-17  |
| TcCLB.507765.40  | hypothetical protein, conserved                            | -0,7551 | 3,295E-12  |
| TcCLB.509647.170 | hypothetical protein, conserved                            | -0,7552 | 6,559E-17  |
| TcCLB.506565.12  | RNA-binding protein, putative                              | -0,7552 | 1,387E-11  |
| TcCLB.507757.10  | hypothetical protein                                       | -0,7552 | 2,519E-09  |
| TcCLB.508799.110 | protein kinase, putative                                   | -0,7552 | 1,354E-07  |
| TcCLB.503897.130 | hypothetical protein, conserved                            | -0,7557 | 3,557E-10  |
| TcCLB.511527.9   | hypothetical protein, conserved                            | -0,7557 | 3,512E-08  |
| TcCLB.442495.10  | cyclic nucleotide-binding domain containing protein, putat | -0,7566 | 2,899E-09  |
| TcCLB.504057.160 | hypothetical protein, conserved                            | -0,757  | 1,963E-09  |
| TcCLB.504087.10  | hypothetical protein, conserved                            | -0,757  | 0,0005807  |
| TcCLB.507011.180 | hypothetical protein, conserved                            | -0,7571 | 2,04E-14   |
| TcCLB.508585.20  | hypothetical protein, conserved                            | -0,7572 | 1,473E-09  |
| TcCLB.511401.95  | hypothetical protein (pseudogene)                          | -0,7575 | 0,00003332 |
| TcCLB.511099.220 | mucin-associated surface protein (MASP), putative          | -0,7576 | 0,03665    |
| TcCLB.503755.10  | DNA polymerase kappa, putative                             | -0,7577 | 1,409E-14  |
| TcCLB.508175.300 | hypothetical protein, conserved                            | -0,7577 | 5,727E-12  |
| TcCLB.508081.40  | hypothetical protein                                       | -0,7578 | 0,07385    |
| TcCLB.508251.31  | mucin-associated surface protein (MASP, pseudogene), pi    | -0,7579 | 0,0005247  |
| TcCLB.503865.80  | phosphatidylinositol 4-kinase, putative                    | -0,7584 | 5,13E-10   |
| TcCLB.511737.50  | hypothetical protein, conserved                            | -0,7585 | 3,146E-09  |
| TcCLB.511127.360 | hypothetical protein, conserved                            | -0,7591 | 1,726E-10  |
| TcCLB.509569.10  | hypothetical protein, conserved                            | -0,7591 | 3,259E-08  |
| TcCLB.508523.35  | hypothetical protein, conserved (pseudogene)               | -0,7592 | 3,394E-12  |
| TcCLB.511043.45  | trans-sialidase (pseudogene), putative                     | -0,7593 | 1,536E-11  |
| TcCLB.508737.130 | hypothetical protein, conserved                            | -0,7594 | 1,177E-08  |
| TcCLB.506801.50  | surface protease GP63 (pseudogene), putative               | -0,7595 | 1,25E-07   |
| TcCLB.506753.100 | hypothetical protein, conserved                            | -0,7604 | 2,181E-06  |
| TcCLB.508211.50  | hypothetical protein, conserved                            | -0,7611 | 6,813E-08  |
| TcCLB.508301.10  | hypothetical protein, conserved                            | -0,7611 | 7,436E-08  |
| TcCLB.511607.30  | mucin TcMUCII, putative                                    | -0,7611 | 0,05874    |
| TcCLB.508293.160 | trans-sialidase (pseudogene), putative                     | -0,7612 | 0,1068     |
| TcCLB.511323.10  | trans-sialidase, Group I, putative                         | -0,762  | 2,503E-11  |
| TcCLB.509863.10  | UDP-Gal or UDP-GlcNAc-dependent glycosyltransferase, p     | -0,7624 | 9,612E-08  |
| TcCLB.511871.170 | trans-sialidase (pseudogene), putative                     | -0,7624 | 0,00007891 |

|                  |                                                          |         |            |
|------------------|----------------------------------------------------------|---------|------------|
| TcCLB.511173.270 | mucin-associated surface protein (MASP), putative        | -0,7628 | 8,378E-06  |
| TcCLB.510877.80  | phospholipid-transporting ATPase-like protein, putative  | -0,7629 | 8,073E-21  |
| TcCLB.510431.130 | hypothetical protein, conserved                          | -0,7629 | 5,334E-10  |
| TcCLB.504021.149 | hypothetical protein, conserved (fragment)               | -0,7629 | 4,518E-09  |
| TcCLB.511357.5   | glycerol uptake protein, putative (fragment)             | -0,7632 | 3,316E-07  |
| TcCLB.507031.179 | hypothetical protein, conserved                          | -0,7636 | 3,078E-10  |
| TcCLB.504449.14  | hypothetical protein, conserved (fragment)               | -0,7643 | 8,726E-25  |
| TcCLB.507091.150 | hypothetical protein, conserved (pseudogene)             | -0,7643 | 1,713E-08  |
| TcCLB.504051.30  | hypothetical protein, conserved                          | -0,7651 | 3,503E-15  |
| TcCLB.503959.40  | hypothetical protein                                     | -0,7654 | 3,152E-12  |
| TcCLB.508127.5   | hypothetical protein, conserved                          | -0,7654 | 0,00001153 |
| TcCLB.508207.230 | 6-phosphofructo-2-kinase/fructose-2,6-biphosphatase, pu  | -0,7661 | 1,846E-15  |
| TcCLB.507511.91  | mucin TcMUCIII, putative                                 | -0,7666 | 5,681E-11  |
| TcCLB.511761.20  | hypothetical protein, conserved                          | -0,7667 | 5,571E-08  |
| TcCLB.507611.70  | trans-sialidase (pseudogene), putative                   | -0,7668 | 8,854E-06  |
| TcCLB.509105.120 | protein kinase, putative                                 | -0,7671 | 4,589E-11  |
| TcCLB.507143.40  | hypothetical protein, conserved                          | -0,7677 | 1,427E-21  |
| TcCLB.511527.50  | AUT2/APG4/ATG4 cysteine peptidase, putative              | -0,7679 | 4,011E-15  |
| TcCLB.510367.20  | retrotransposon hot spot protein (RHS, pseudogene), puta | -0,7679 | 0,0000235  |
| TcCLB.504113.41  | hypothetical protein, conserved (fragment)               | -0,7681 | 0,0001466  |
| TcCLB.510765.10  | hypothetical protein, conserved                          | -0,7682 | 1,39E-10   |
| TcCLB.503973.57  | mucin TcMUCII (pseudogene), putative                     | -0,7682 | 0,0107     |
| TcCLB.508411.50  | hypothetical protein, conserved                          | -0,7683 | 1,969E-16  |
| TcCLB.511127.300 | hypothetical protein, conserved                          | -0,7692 | 0,007244   |
| TcCLB.506321.60  | surface protease GP63 (pseudogene), putative             | -0,7695 | 0,003402   |
| TcCLB.508775.60  | hypothetical protein, conserved (pseudogene)             | -0,7705 | 0,0004829  |
| TcCLB.511287.130 | hypothetical protein, conserved                          | -0,771  | 1,638E-16  |
| TcCLB.507847.20  | mucin-associated surface protein (MASP, pseudogene), pu  | -0,7711 | 2,167E-10  |
| TcCLB.506321.330 | hypothetical protein, conserved                          | -0,7716 | 8,512E-16  |
| TcCLB.509259.10  | trans-sialidase (pseudogene), putative                   | -0,7718 | 0,0005008  |
| TcCLB.511255.210 | mucin TcMUCII, putative                                  | -0,7718 | 0,1585     |
| TcCLB.507763.10  | hypothetical protein, conserved                          | -0,772  | 2,594E-10  |
| TcCLB.509345.30  | trans-sialidase (pseudogene), putative                   | -0,7721 | 5E-11      |
| TcCLB.506467.4   | hypothetical protein, conserved                          | -0,7723 | 3,975E-07  |
| TcCLB.508175.80  | protein kinase, putative                                 | -0,7727 | 5,144E-22  |
| TcCLB.506137.27  | mucin-associated surface protein (MASP, pseudogene), pu  | -0,7727 | 0,003423   |
| TcCLB.506317.10  | hypothetical protein, conserved                          | -0,7733 | 1,238E-12  |
| TcCLB.511279.40  | hypothetical protein, conserved                          | -0,7741 | 7,488E-07  |
| TcCLB.511261.120 | pumilio/PUF RNA binding protein 2, putative (PUF2)       | -0,7741 | 0,00001937 |
| TcCLB.506401.290 | hypothetical protein, conserved                          | -0,7753 | 4,095E-06  |
| TcCLB.506873.20  | hypothetical protein, conserved                          | -0,7755 | 1,821E-10  |
| TcCLB.508777.120 | hypothetical protein, conserved                          | -0,7756 | 5,299E-11  |
| TcCLB.506287.200 | DNA ligase, putative                                     | -0,7758 | 2,186E-06  |
| TcCLB.508305.30  | hypothetical protein                                     | -0,7765 | 0,09052    |
| TcCLB.504025.19  | hypothetical protein, conserved (fragment)               | -0,7767 | 5,16E-07   |

|                  |                                                                   |         |           |
|------------------|-------------------------------------------------------------------|---------|-----------|
| TcCLB.508495.30  | hypothetical protein                                              | -0,7772 | 0,01085   |
| TcCLB.506789.190 | hypothetical protein, conserved                                   | -0,7774 | 9,439E-14 |
| TcCLB.511127.429 | hypothetical protein, conserved                                   | -0,7775 | 3,035E-08 |
| TcCLB.510297.30  | TPR-repeat-containing chaperone protein DNAJ, putative            | -0,7778 | 8,158E-18 |
| TcCLB.504181.40  | cdc2-related kinase 1, putative (TzCRK1)                          | -0,7778 | 7,273E-12 |
| TcCLB.506131.199 | mucin TcMUCII, putative                                           | -0,778  | 0,03461   |
| TcCLB.507637.45  | mucin-associated surface protein (MASP, pseudogene), putative     | -0,7782 | 0,02973   |
| TcCLB.506591.120 | receptor-type adenylate cyclase (pseudogene), putative            | -0,7786 | 1,892E-15 |
| TcCLB.506887.50  | katanin, putative                                                 | -0,7787 | 1,227E-11 |
| TcCLB.505997.210 | DNA-directed RNA polymerase III subunit, putative                 | -0,779  | 7,655E-07 |
| TcCLB.503559.70  | cystinosin, putative                                              | -0,7793 | 1,031E-07 |
| TcCLB.507711.240 | hypothetical protein, conserved                                   | -0,7797 | 7,102E-15 |
| TcCLB.481211.20  | hypothetical protein                                              | -0,78   | 1,417E-06 |
| TcCLB.507035.80  | trans-sialidase (pseudogene), putative                            | -0,7802 | 1,238E-11 |
| TcCLB.508199.70  | hypothetical protein                                              | -0,7804 | 6,471E-15 |
| TcCLB.507787.110 | hypothetical protein, conserved                                   | -0,7804 | 2,795E-08 |
| TcCLB.506775.160 | hypothetical protein, conserved                                   | -0,7808 | 8,246E-15 |
| TcCLB.506559.129 | eukaryotic translation initiation factor 2-alpha kinase, putative | -0,781  | 3,431E-15 |
| TcCLB.508293.44  | mucin-associated surface protein (MASP, pseudogene), putative     | -0,7812 | 0,09077   |
| TcCLB.460111.10  | trans-sialidase, putative (fragment)                              | -0,7816 | 0,08446   |
| TcCLB.511021.40  | hypothetical protein, conserved                                   | -0,782  | 5,528E-13 |
| TcCLB.503697.140 | hypothetical protein                                              | -0,782  | 1,18E-09  |
| TcCLB.507677.4   | hypothetical protein, conserved                                   | -0,7821 | 2,992E-07 |
| TcCLB.508495.150 | mucin-associated surface protein (MASP, pseudogene), putative     | -0,7822 | 0,0001747 |
| TcCLB.511431.50  | hypothetical protein, conserved                                   | -0,7825 | 1,378E-15 |
| TcCLB.503957.60  | trans-sialidase (pseudogene), putative                            | -0,7827 | 1,303E-11 |
| TcCLB.506297.120 | hypothetical protein, conserved                                   | -0,7833 | 1,857E-14 |
| TcCLB.510551.50  | trans-sialidase, putative                                         | -0,7836 | 0,04694   |
| TcCLB.509429.250 | ubiquitin hydrolase, putative                                     | -0,7842 | 1,105E-19 |
| TcCLB.506753.160 | hypothetical protein, conserved                                   | -0,7847 | 1,407E-07 |
| TcCLB.506401.280 | hypothetical protein, conserved                                   | -0,7848 | 5,446E-14 |
| TcCLB.509897.155 | trans-sialidase (pseudogene), putative                            | -0,7849 | 4,331E-08 |
| TcCLB.508273.80  | syntaxin binding protein, putative                                | -0,7853 | 0,0002467 |
| TcCLB.503809.158 | Triglyceride lipase, putative (fragment)                          | -0,7856 | 0,0001669 |
| TcCLB.509819.40  | hypothetical protein, conserved                                   | -0,7858 | 1,193E-17 |
| TcCLB.511169.20  | hypothetical protein, conserved                                   | -0,7863 | 1,026E-11 |
| TcCLB.506579.50  | hypothetical protein, conserved                                   | -0,7864 | 2,077E-16 |
| TcCLB.510555.21  | hypothetical protein                                              | -0,7866 | 0,006698  |
| TcCLB.504115.110 | trans-sialidase (pseudogene), putative                            | -0,7867 | 1,417E-07 |
| TcCLB.509741.34  | hypothetical protein, conserved                                   | -0,7872 | 2,051E-07 |
| TcCLB.469113.10  | trans-sialidase (pseudogene), putative                            | -0,7878 | 3,741E-06 |
| TcCLB.506857.120 | hypothetical protein, conserved                                   | -0,7881 | 0,04308   |
| TcCLB.508439.10  | hypothetical protein, conserved                                   | -0,7886 | 1,515E-06 |
| TcCLB.506603.46  | hypothetical protein, conserved (pseudogene)                      | -0,789  | 0,02618   |
| TcCLB.504153.270 | hypothetical protein, conserved                                   | -0,7891 | 2,018E-21 |

|                  |                                                          |         |            |
|------------------|----------------------------------------------------------|---------|------------|
| TcCLB.510201.15  | mucin TcMUCII (pseudogene), putative                     | -0,7895 | 0,0003067  |
| TcCLB.507471.20  | mucin-associated surface protein (MASP, pseudogene), pi  | -0,7896 | 0,0001458  |
| TcCLB.504411.5   | hypothetical protein, conserved (fragment)               | -0,7899 | 0,08359    |
| TcCLB.509815.20  | trans-sialidase (pseudogene), putative                   | -0,79   | 2,914E-11  |
| TcCLB.506269.79  | mucin-associated surface protein (MASP, pseudogene), pi  | -0,7904 | 0,0004875  |
| TcCLB.507623.140 | endonuclease G, putative                                 | -0,7909 | 3,651E-09  |
| TcCLB.510481.20  | dispersed gene family protein 1 (DGF-1, pseudogene), put | -0,7911 | 0,01784    |
| TcCLB.511805.20  | Trichohyalin, putative                                   | -0,7914 | 1,279E-07  |
| TcCLB.509429.10  | trans-sialidase (pseudogene), putative                   | -0,7916 | 6,181E-09  |
| TcCLB.504147.280 | trypanothione synthetase-like protein, putative          | -0,7917 | 7,016E-23  |
| TcCLB.506599.315 | hypothetical protein, conserved (pseudogene)             | -0,7918 | 0,001014   |
| TcCLB.510289.3   | hypothetical protein, conserved                          | -0,7919 | 7,269E-06  |
| TcCLB.510489.10  | hypothetical protein                                     | -0,7921 | 0,001491   |
| TcCLB.508165.120 | mucin-associated surface protein (MASP), putative        | -0,7925 | 0,0004509  |
| TcCLB.506181.70  | hypothetical protein, conserved                          | -0,7929 | 2,512E-13  |
| TcCLB.511507.80  | ferric reductase transmembrane protein, putative         | -0,7932 | 0,0001308  |
| TcCLB.510819.90  | hypothetical protein, conserved                          | -0,7939 | 3,926E-10  |
| TcCLB.507521.100 | hypothetical protein, conserved                          | -0,7942 | 2,332E-09  |
| TcCLB.506331.139 | mucin-associated surface protein (MASP, pseudogene), pi  | -0,7943 | 4,964E-07  |
| TcCLB.506409.220 | hypothetical protein                                     | -0,7944 | 1,824E-10  |
| TcCLB.511403.15  | mucin TcMUC (pseudogene), putative                       | -0,795  | 0,1302     |
| TcCLB.509047.119 | hypothetical protein, conserved (fragment)               | -0,7951 | 0,00001733 |
| TcCLB.511211.40  | molybdenum cofactor biosynthesis protein, putative       | -0,7954 | 1,038E-14  |
| TcCLB.506717.25  | trans-sialidase (pseudogene), putative                   | -0,7954 | 4,208E-08  |
| TcCLB.510697.25  | surface protease GP63 (pseudogene), putative             | -0,7954 | 0,001106   |
| TcCLB.510885.100 | hypothetical protein, conserved                          | -0,7955 | 1,984E-12  |
| TcCLB.511255.270 | trans-sialidase (pseudogene), putative                   | -0,7961 | 0,003214   |
| TcCLB.506865.70  | hypothetical protein, conserved                          | -0,7965 | 2,009E-15  |
| TcCLB.504787.54  | mucin-associated surface protein (MASP, pseudogene), pi  | -0,7966 | 7,586E-06  |
| TcCLB.505843.40  | E1-like ubiquitin-activating enzyme, putative (UBA5)     | -0,7978 | 6,929E-21  |
| TcCLB.509647.80  | hypothetical protein, conserved                          | -0,7981 | 1,624E-13  |
| TcCLB.504091.5   | hypothetical protein, conserved (fragment)               | -0,7986 | 0,0166     |
| TcCLB.508595.35  | hypothetical protein (pseudogene)                        | -0,7989 | 0,003203   |
| TcCLB.506247.120 | hypothetical protein, conserved                          | -0,7996 | 2,2E-19    |
| TcCLB.508871.170 | trans-sialidase, Group V, putative                       | -0,7996 | 0,00001157 |
| TcCLB.510269.50  | mucin-associated surface protein (MASP), putative        | -0,8    | 0,0000941  |
| TcCLB.508777.140 | palmitoyl acyltransferase 5, putative                    | -0,8002 | 2,505E-17  |
| TcCLB.509699.35  | hypothetical protein, conserved (pseudogene)             | -0,8002 | 0,0001405  |
| TcCLB.504243.10  | RNA-binding protein, putative                            | -0,8005 | 4,394E-16  |
| TcCLB.469735.9   | hypothetical protein, conserved                          | -0,8005 | 8,38E-11   |
| TcCLB.506741.135 | mucin TcMUCII (pseudogene), putative                     | -0,8005 | 0,009502   |
| TcCLB.508299.50  | hypothetical protein, conserved                          | -0,8006 | 1,579E-29  |
| TcCLB.506469.130 | SNARE domain-containing protein, putative                | -0,8009 | 1,576E-10  |
| TcCLB.508527.30  | trans-sialidase (pseudogene), putative                   | -0,801  | 8,115E-11  |
| TcCLB.509877.50  | glycosomal membrane protein, putative                    | -0,8013 | 6,977E-10  |



|                  |                                                         |         |            |
|------------------|---------------------------------------------------------|---------|------------|
| TcCLB.413893.10  | trans-sialidase (pseudogene), putative                  | -0,8013 | 0,006146   |
| TcCLB.510643.40  | trans-sialidase, Group VIII, putative                   | -0,802  | 0,00003602 |
| TcCLB.510833.40  | trans-sialidase (pseudogene), putative                  | -0,8021 | 0,00003839 |
| TcCLB.506291.20  | hypothetical protein                                    | -0,8026 | 0,04776    |
| TcCLB.508461.150 | hypothetical protein, conserved                         | -0,8028 | 2,677E-11  |
| TcCLB.508245.50  | hypothetical protein                                    | -0,8031 | 0,00002357 |
| TcCLB.507689.5   | hypothetical protein, conserved (fragment)              | -0,8033 | 0,00005056 |
| TcCLB.510371.40  | hypothetical protein                                    | -0,8033 | 0,0125     |
| TcCLB.510755.19  | hypothetical protein, conserved                         | -0,8047 | 7,152E-12  |
| TcCLB.511183.90  | mucin TcMUCII, putative                                 | -0,8051 | 0,007136   |
| TcCLB.508175.270 | hypothetical protein                                    | -0,8057 | 2,747E-09  |
| TcCLB.511409.30  | hypothetical protein, conserved                         | -0,8058 | 2,938E-17  |
| TcCLB.509707.25  | hypothetical protein, conserved                         | -0,8058 | 4,347E-07  |
| TcCLB.510657.200 | surface protease GP63, putative                         | -0,8067 | 3,902E-09  |
| TcCLB.508827.110 | leucine-rich repeat protein (LRRP), putative            | -0,807  | 2,34E-09   |
| TcCLB.509965.40  | ubiquitin hydrolase, putative                           | -0,8071 | 5,695E-16  |
| TcCLB.511167.20  | hypothetical protein, conserved                         | -0,8078 | 1,098E-14  |
| TcCLB.508081.60  | hypothetical protein                                    | -0,8078 | 0,004656   |
| TcCLB.413133.10  | mucin TcMUCII (pseudogene), putative                    | -0,8079 | 0,000514   |
| TcCLB.510303.160 | hypothetical protein, conserved                         | -0,8083 | 2,287E-17  |
| TcCLB.504069.34  | hypothetical protein, conserved                         | -0,8087 | 2,251E-06  |
| TcCLB.506667.130 | surface protease GP63 (pseudogene), putative            | -0,8089 | 0,02667    |
| TcCLB.511259.230 | trans-sialidase (pseudogene), putative                  | -0,8091 | 0,001275   |
| TcCLB.510221.20  | hypothetical protein, conserved                         | -0,8092 | 1,168E-12  |
| TcCLB.511165.10  | ATP-dependent DEAD/H RNA helicase, putative             | -0,8095 | 5,55E-12   |
| TcCLB.508175.210 | hypothetical protein, conserved                         | -0,8095 | 2,632E-06  |
| TcCLB.504099.50  | trans-sialidase, Group II, putative                     | -0,8097 | 3,949E-08  |
| TcCLB.511233.90  | hypothetical protein, conserved                         | -0,8098 | 4,387E-06  |
| TcCLB.510055.10  | trans-sialidase, putative                               | -0,8099 | 2,072E-08  |
| TcCLB.503775.50  | mucin TcMUCII (pseudogene), putative                    | -0,8106 | 0,00879    |
| TcCLB.511205.10  | surface protease GP63 (pseudogene), putative            | -0,8108 | 3,888E-10  |
| TcCLB.503553.10  | trans-sialidase (pseudogene), putative                  | -0,812  | 0,009475   |
| TcCLB.506883.80  | tRNA (guanine-N(7)-)-methyltransferase, putative        | -0,8121 | 4,003E-12  |
| TcCLB.431849.10  | hypothetical protein, conserved                         | -0,8125 | 0,00002578 |
| TcCLB.508139.155 | protein kinase (pseudogene), putative                   | -0,8131 | 2,204E-07  |
| TcCLB.510887.30  | hypothetical protein, conserved                         | -0,8139 | 7,233E-09  |
| TcCLB.506681.50  | hypothetical protein, conserved                         | -0,8142 | 3,193E-21  |
| TcCLB.506755.100 | hypothetical protein, conserved                         | -0,8142 | 7,916E-11  |
| TcCLB.511071.90  | hypothetical protein                                    | -0,8144 | 0,00006091 |
| TcCLB.511149.190 | mucin-associated surface protein (MASP, pseudogene), pi | -0,8151 | 0,00003127 |
| TcCLB.508175.20  | hypothetical protein, conserved                         | -0,8154 | 1,054E-26  |
| TcCLB.509065.170 | hypothetical protein, conserved                         | -0,8154 | 3,378E-17  |
| TcCLB.506755.180 | hypothetical protein, conserved                         | -0,8155 | 3,121E-08  |
| TcCLB.507085.110 | hypothetical protein                                    | -0,8157 | 0,0001496  |
| TcCLB.506509.10  | hypothetical protein, conserved                         | -0,8159 | 4,381E-12  |

|                  |                                                               |         |            |
|------------------|---------------------------------------------------------------|---------|------------|
| TcCLB.511649.39  | hypothetical protein, conserved                               | -0,816  | 5,795E-08  |
| TcCLB.505297.50  | trans-sialidase (pseudogene), putative                        | -0,8163 | 5,505E-19  |
| TcCLB.508593.100 | hypothetical protein, conserved                               | -0,8171 | 0,0001825  |
| TcCLB.510431.120 | hypothetical protein, conserved                               | -0,8173 | 2,37E-14   |
| TcCLB.508835.10  | hypothetical protein, conserved (pseudogene)                  | -0,8177 | 3,996E-07  |
| TcCLB.506131.114 | mucin TcMUC (pseudogene), putative                            | -0,8183 | 0,01006    |
| TcCLB.508277.190 | ERAD-associated E3 ubiquitin-protein ligase HRD1, putative    | -0,8184 | 2,908E-20  |
| TcCLB.509671.110 | hypothetical protein, conserved                               | -0,8186 | 5,478E-11  |
| TcCLB.511259.80  | mucin TcMUCII, putative                                       | -0,8188 | 0,002266   |
| TcCLB.506759.31  | surface protease GP63 (pseudogene), putative                  | -0,8189 | 0,0006381  |
| TcCLB.508495.20  | trans-sialidase (pseudogene), putative                        | -0,8192 | 4,193E-13  |
| TcCLB.508461.330 | hypothetical protein                                          | -0,8193 | 3,763E-13  |
| TcCLB.506247.74  | hypothetical protein, conserved                               | -0,8193 | 1,573E-06  |
| TcCLB.508727.30  | hypothetical protein, conserved                               | -0,8195 | 3,133E-08  |
| TcCLB.506459.230 | trans-sialidase, Group V, putative                            | -0,8199 | 9,005E-08  |
| TcCLB.508737.154 | hypothetical protein, conserved                               | -0,82   | 7,749E-06  |
| TcCLB.511621.170 | hypothetical protein, conserved                               | -0,8203 | 1,042E-06  |
| TcCLB.510339.40  | hypothetical protein, conserved                               | -0,821  | 2,363E-13  |
| TcCLB.506951.30  | trans-sialidase (pseudogene), putative                        | -0,8214 | 0,00005075 |
| TcCLB.510013.190 | hypothetical protein                                          | -0,8214 | 0,01893    |
| TcCLB.510709.70  | trans-sialidase, Group V, putative                            | -0,8214 | 0,07178    |
| TcCLB.509195.80  | trans-sialidase (pseudogene), putative                        | -0,822  | 2,602E-07  |
| TcCLB.511857.10  | hypothetical protein, conserved                               | -0,8221 | 5,022E-11  |
| TcCLB.506627.130 | dispersed gene family protein 1 (DGF-1, pseudogene), putative | -0,8222 | 0,01229    |
| TcCLB.504085.70  | Zinc finger protein, C3H1 type-like (ZC3H46)                  | -0,8222 | 0,06655    |
| TcCLB.511203.10  | surface protease GP63, putative                               | -0,8229 | 0,0001698  |
| TcCLB.507511.81  | mucin TcMUCII, putative                                       | -0,8234 | 1,898E-11  |
| TcCLB.506241.10  | retrotransposon hot spot protein (RHS, pseudogene), putative  | -0,8235 | 1,076E-06  |
| TcCLB.510901.160 | hypothetical protein, conserved                               | -0,8244 | 1,768E-09  |
| TcCLB.511797.210 | trans-sialidase (pseudogene), putative                        | -0,8252 | 0,00003513 |
| TcCLB.510693.220 | mucin TcMUCII, putative                                       | -0,8252 | 0,006183   |
| TcCLB.505037.70  | trans-sialidase (pseudogene), putative                        | -0,8255 | 2,181E-07  |
| TcCLB.506305.10  | hypothetical protein, conserved                               | -0,8257 | 2,806E-26  |
| TcCLB.506965.120 | hypothetical protein                                          | -0,8261 | 0,02704    |
| TcCLB.511495.11  | hypothetical protein, conserved (fragment)                    | -0,8266 | 0,00000466 |
| TcCLB.510107.30  | mucin-associated surface protein (MASP), putative             | -0,8269 | 0,0002805  |
| TcCLB.508761.150 | mucin-associated surface protein (MASP, pseudogene), putative | -0,8276 | 0,01001    |
| TcCLB.510483.200 | hypothetical protein                                          | -0,828  | 0,01448    |
| TcCLB.511861.111 | elongation factor 1-gamma (EF-1-gamma), putative              | -0,828  | 0,05145    |
| TcCLB.511181.60  | hypothetical protein, conserved                               | -0,8281 | 4,979E-13  |
| TcCLB.508443.60  | hypothetical protein, conserved                               | -0,8281 | 4,848E-09  |
| TcCLB.503533.30  | trans-sialidase, Group V, putative                            | -0,8283 | 0,07019    |
| TcCLB.506577.10  | hypothetical protein, conserved                               | -0,8289 | 2,776E-08  |
| TcCLB.511517.156 | hypothetical protein, conserved                               | -0,8293 | 1,153E-11  |
| TcCLB.510305.50  | hypothetical protein, conserved                               | -0,8304 | 1,266E-21  |

|                  |                                                          |         |            |
|------------------|----------------------------------------------------------|---------|------------|
| TcCLB.510483.210 | trans-sialidase (pseudogene), putative                   | -0,8308 | 1,451E-12  |
| TcCLB.508209.150 | hypothetical protein, conserved                          | -0,8314 | 1,2E-20    |
| TcCLB.509167.200 | hypothetical protein, conserved                          | -0,832  | 7,93E-17   |
| TcCLB.506753.90  | hypothetical protein, conserved                          | -0,8321 | 8,881E-26  |
| TcCLB.508761.200 | trans-sialidase (pseudogene), putative                   | -0,8329 | 0,0004199  |
| TcCLB.506739.140 | hypothetical protein, conserved                          | -0,8339 | 0,00004343 |
| TcCLB.506345.40  | trans-sialidase, Group II, putative                      | -0,8341 | 9,868E-13  |
| TcCLB.510421.180 | casein kinase I, putative                                | -0,8342 | 1,261E-11  |
| TcCLB.508363.10  | hypothetical protein                                     | -0,8345 | 0,01595    |
| TcCLB.509369.20  | retrotransposon hot spot protein (RHS, pseudogene), puta | -0,8351 | 0,007516   |
| TcCLB.506559.330 | clathrin coat assembly protein AP17, putative            | -0,8357 | 2,187E-10  |
| TcCLB.511401.80  | hypothetical protein, conserved (pseudogene)             | -0,8359 | 1,777E-10  |
| TcCLB.506469.90  | hypothetical protein, conserved                          | -0,8359 | 3,644E-06  |
| TcCLB.503771.74  | mucin TcMUCII (pseudogene), putative                     | -0,8359 | 0,02061    |
| TcCLB.506267.19  | hypothetical protein                                     | -0,8366 | 0,0006452  |
| TcCLB.509429.200 | hypothetical protein, conserved                          | -0,8368 | 1,008E-13  |
| TcCLB.510519.100 | hypothetical protein, conserved                          | -0,8374 | 9,592E-10  |
| TcCLB.509695.190 | cdc2-related kinase 1, putative (CRK1)                   | -0,8378 | 4,324E-15  |
| TcCLB.511921.100 | trans-sialidase (pseudogene), putative                   | -0,838  | 9,449E-06  |
| TcCLB.509663.10  | myosin heavy chain, putative                             | -0,8384 | 4,106E-22  |
| TcCLB.508479.50  | trans-sialidase (pseudogene), putative                   | -0,8397 | 3,858E-11  |
| TcCLB.510607.70  | trans-sialidase (pseudogene), putative                   | -0,8401 | 0,00003368 |
| TcCLB.508869.59  | mucin-associated surface protein (MASP), putative        | -0,8406 | 0,06006    |
| TcCLB.506435.210 | hypothetical protein, conserved                          | -0,841  | 3,35E-15   |
| TcCLB.508691.10  | hypothetical protein, conserved                          | -0,8412 | 1,707E-08  |
| TcCLB.506945.50  | hypothetical protein, conserved                          | -0,8414 | 1,724E-15  |
| TcCLB.510901.180 | hypothetical protein, conserved                          | -0,8415 | 1,557E-12  |
| TcCLB.506955.240 | trans-sialidase, Group V, putative                       | -0,8415 | 8,379E-07  |
| TcCLB.504147.250 | hypothetical protein, conserved                          | -0,8416 | 6,867E-29  |
| TcCLB.506529.70  | hypothetical protein, conserved                          | -0,8418 | 1,863E-14  |
| TcCLB.506459.200 | hypothetical protein                                     | -0,8418 | 0,0297     |
| TcCLB.511183.270 | mucin TcMUCII (pseudogene), putative                     | -0,8419 | 0,02122    |
| TcCLB.506775.70  | hypothetical protein, conserved                          | -0,8424 | 4,703E-16  |
| TcCLB.510131.70  | DNA polymerase kappa, putative                           | -0,8432 | 1,376E-08  |
| TcCLB.508175.264 | hypothetical protein, conserved (pseudogene)             | -0,8439 | 3,684E-10  |
| TcCLB.506579.80  | hypothetical protein, conserved                          | -0,844  | 1,455E-15  |
| TcCLB.508355.360 | hypothetical protein, conserved                          | -0,8441 | 1,281E-08  |
| TcCLB.510693.251 | mucin TcMUC (pseudogene), putative                       | -0,8441 | 0,002594   |
| TcCLB.506145.80  | surface protease GP63, putative                          | -0,845  | 7,365E-19  |
| TcCLB.508161.30  | mucin-associated surface protein (MASP), putative        | -0,8456 | 0,00003243 |
| TcCLB.508221.30  | mucin-associated surface protein (MASP), putative        | -0,8459 | 0,02629    |
| TcCLB.503659.20  | mucin TcMUCII (pseudogene), putative                     | -0,8463 | 0,000171   |
| TcCLB.507143.70  | hypothetical protein, conserved                          | -0,8466 | 4,715E-22  |
| TcCLB.506743.60  | hypothetical protein, conserved                          | -0,8468 | 2,799E-19  |
| TcCLB.507991.120 | translation initiation factor IF-2, putative             | -0,8468 | 2,443E-12  |

|                  |                                                           |         |            |
|------------------|-----------------------------------------------------------|---------|------------|
| TcCLB.508435.60  | mucin TcMUCII, putative                                   | -0,8471 | 0,03054    |
| TcCLB.506129.50  | trans-sialidase, Group IV, putative                       | -0,8476 | 1,103E-18  |
| TcCLB.511923.120 | dihydroorotate dehydrogenase, putative (DHODH)            | -0,8477 | 7,188E-10  |
| TcCLB.506459.120 | mucin TcMUCII, putative                                   | -0,8477 | 0,01315    |
| TcCLB.506737.121 | mucin-associated surface protein (MASP, pseudogene), pu   | -0,8479 | 3,263E-15  |
| TcCLB.511765.55  | trans-sialidase (pseudogene), putative                    | -0,8483 | 0,007629   |
| TcCLB.506473.4   | hypothetical protein, conserved (pseudogene)              | -0,849  | 0,02741    |
| TcCLB.507711.290 | hypothetical protein, conserved                           | -0,8491 | 9,302E-13  |
| TcCLB.506501.27  | syntaxin binding protein (pseudogene), putative           | -0,8491 | 0,03391    |
| TcCLB.504239.401 | hypothetical protein, conserved (pseudogene)              | -0,8493 | 0,03824    |
| TcCLB.504741.80  | hypothetical protein, conserved                           | -0,8502 | 3,85E-11   |
| TcCLB.403153.10  | receptor-type adenylate cyclase (pseudogene), putative    | -0,8504 | 1,533E-06  |
| TcCLB.511675.30  | retrotransposon hot spot protein (RHS, pseudogene), puta  | -0,8504 | 0,01759    |
| TcCLB.508831.180 | beta galactofuranosyl glycosyltransferase (pseudogene), f | -0,851  | 0,01056    |
| TcCLB.511259.70  | mucin-associated surface protein (MASP, pseudogene), pu   | -0,8514 | 0,0002812  |
| TcCLB.511625.130 | trans-sialidase, Group V, putative                        | -0,8515 | 0,00004716 |
| TcCLB.508175.133 | hypothetical protein, conserved (pseudogene)              | -0,8518 | 2,419E-24  |
| TcCLB.509419.58  | mucin TcMUCII (pseudogene), putative                      | -0,8525 | 0,05148    |
| TcCLB.504045.5   | hypothetical protein, conserved (fragment)                | -0,8526 | 0,0001548  |
| TcCLB.506567.80  | hypothetical protein                                      | -0,8527 | 1,878E-13  |
| TcCLB.504313.10  | trans-sialidase, Group IV, putative                       | -0,8528 | 0,008116   |
| TcCLB.511787.10  | mucin-associated surface protein (MASP), putative         | -0,8529 | 0,04933    |
| TcCLB.511591.10  | mucin-associated surface protein (MASP), putative         | -0,853  | 0,03239    |
| TcCLB.506995.60  | surface protease GP63, putative                           | -0,8531 | 0,002233   |
| TcCLB.508813.40  | surface protease GP63, putative                           | -0,8532 | 6,784E-10  |
| TcCLB.506513.150 | hypothetical protein, conserved                           | -0,8534 | 1,169E-12  |
| TcCLB.509601.110 | hypothetical protein, conserved                           | -0,8537 | 3,21E-15   |
| TcCLB.511281.50  | surface protease GP63, putative                           | -0,8539 | 1,118E-08  |
| TcCLB.511555.20  | hypothetical protein, conserved                           | -0,8543 | 1,124E-20  |
| TcCLB.509735.100 | trans-sialidase (pseudogene), putative                    | -0,8544 | 2,568E-08  |
| TcCLB.410199.7   | hypothetical protein                                      | -0,8545 | 0,001238   |
| TcCLB.506139.4   | mucin TcMUCII, putative                                   | -0,8548 | 0,05858    |
| TcCLB.507847.10  | mucin TcMUCII (pseudogene), putative                      | -0,8549 | 9,061E-07  |
| TcCLB.510243.60  | hypothetical protein                                      | -0,8564 | 1,274E-18  |
| TcCLB.510199.10  | GP85-like protein, putative                               | -0,857  | 0,01158    |
| TcCLB.508573.80  | trans-sialidase (pseudogene), putative                    | -0,8571 | 7,95E-09   |
| TcCLB.508521.81  | elongation factor 1-gamma (EF-1-gamma), putative          | -0,8572 | 0,0006012  |
| TcCLB.506599.40  | hypothetical protein                                      | -0,8574 | 0,02452    |
| TcCLB.508525.5   | cAMP response protein 1, putative (pseudogene)            | -0,8576 | 8,344E-06  |
| TcCLB.511255.190 | trans-sialidase, Group V, putative                        | -0,8576 | 0,000324   |
| TcCLB.506939.209 | mucin TcMUCII (pseudogene), putative                      | -0,8576 | 0,0003366  |
| TcCLB.508229.20  | hypothetical protein                                      | -0,8577 | 0,0103     |
| TcCLB.508629.100 | trans-sialidase (pseudogene), putative                    | -0,8581 | 5,928E-15  |
| TcCLB.507801.230 | trans-sialidase (pseudogene), putative                    | -0,8582 | 1,912E-07  |
| TcCLB.506637.30  | hypothetical protein, conserved                           | -0,8583 | 6,032E-25  |

|                  |                                                          |         |            |
|------------------|----------------------------------------------------------|---------|------------|
| TcCLB.506769.90  | surface protease GP63, putative                          | -0,8584 | 0,004403   |
| TcCLB.508221.360 | mucin-associated surface protein (MASP, pseudogene), pi  | -0,8591 | 0,02777    |
| TcCLB.506999.10  | hypothetical protein, conserved                          | -0,8592 | 2,563E-12  |
| TcCLB.510481.30  | hypothetical protein, conserved                          | -0,8594 | 0,06393    |
| TcCLB.508577.110 | hypothetical protein, conserved                          | -0,8599 | 2,092E-12  |
| TcCLB.508375.50  | dihydroorotate dehydrogenase (fumarate), putative (DHOI  | -0,8607 | 1,058E-14  |
| TcCLB.510305.60  | hypothetical protein, conserved                          | -0,8611 | 3,625E-30  |
| TcCLB.509053.80  | hypothetical protein, conserved                          | -0,8612 | 3,281E-11  |
| TcCLB.506067.34  | mucin-associated surface protein (MASP, pseudogene), pi  | -0,8616 | 0,00001672 |
| TcCLB.504081.270 | mucin TcMUCII, putative                                  | -0,8617 | 0,01083    |
| TcCLB.510401.31  | retrotransposon hot spot protein (RHS, pseudogene), puta | -0,8623 | 0,03801    |
| TcCLB.505007.30  | hypothetical protein, conserved                          | -0,8626 | 3,385E-12  |
| TcCLB.503993.20  | hypothetical protein                                     | -0,8626 | 0,00603    |
| TcCLB.506245.210 | mucin TcMUCII, putative                                  | -0,8628 | 0,0011     |
| TcCLB.504431.100 | guanine deaminase, putative                              | -0,8637 | 5,67E-13   |
| TcCLB.508057.20  | mucin-associated surface protein (MASP, pseudogene), pi  | -0,8638 | 5,486E-08  |
| TcCLB.506297.130 | zinc finger ccch and cchc domain-containing protein      | -0,8639 | 8,706E-28  |
| TcCLB.506859.4   | N-acetyltransferase, putative (fragment)                 | -0,8644 | 0,00006147 |
| TcCLB.510687.130 | hypothetical protein, conserved                          | -0,8651 | 7,866E-12  |
| TcCLB.508909.260 | hypothetical protein, conserved                          | -0,8651 | 9,464E-06  |
| TcCLB.506195.200 | hypothetical protein, conserved                          | -0,8655 | 2,771E-24  |
| TcCLB.504033.200 | hypothetical protein                                     | -0,8657 | 9,329E-14  |
| TcCLB.509237.40  | hypothetical protein, conserved                          | -0,8658 | 1,033E-10  |
| TcCLB.509085.110 | trans-sialidase (pseudogene), putative                   | -0,8661 | 6,809E-06  |
| TcCLB.509643.10  | hypothetical protein, conserved                          | -0,8661 | 0,00002991 |
| TcCLB.508365.220 | hypothetical protein, conserved (pseudogene)             | -0,8667 | 0,002833   |
| TcCLB.508261.80  | trans-sialidase (pseudogene), putative                   | -0,8668 | 0,0000258  |
| TcCLB.507041.65  | hypothetical protein, conserved (pseudogene)             | -0,8668 | 0,0009395  |
| TcCLB.511499.50  | ubiquitin hydrolase, putative                            | -0,8669 | 8,492E-21  |
| TcCLB.458369.10  | trans-sialidase (pseudogene), putative                   | -0,8672 | 0,0009401  |
| TcCLB.511277.440 | tubulin tyrosine ligase protein, putative                | -0,8679 | 3,1E-13    |
| TcCLB.504083.20  | retrotransposon hot spot protein (RHS, pseudogene), puta | -0,8683 | 0,04164    |
| TcCLB.508293.120 | hypothetical protein                                     | -0,8689 | 0,005899   |
| TcCLB.507875.200 | trans-sialidase (pseudogene), putative                   | -0,8693 | 8,472E-07  |
| TcCLB.410923.20  | retrotransposon hot spot (RHS) protein, putative         | -0,8695 | 2,22E-13   |
| TcCLB.509429.170 | hypothetical protein, conserved                          | -0,8695 | 1,79E-12   |
| TcCLB.509163.6   | hypothetical protein                                     | -0,8699 | 0,04018    |
| TcCLB.510257.50  | hypothetical protein, conserved                          | -0,87   | 5,506E-11  |
| TcCLB.503579.40  | hypothetical protein, conserved                          | -0,8701 | 3,191E-13  |
| TcCLB.511149.60  | mucin-associated surface protein (MASP), putative        | -0,8702 | 0,03069    |
| TcCLB.510879.229 | protein kinase, putative                                 | -0,8704 | 6,209E-07  |
| TcCLB.511867.80  | Vacuolar iron transporter 1, putative (VIT1)             | -0,8706 | 8,689E-15  |
| TcCLB.507941.70  | hypothetical protein, conserved                          | -0,8708 | 2,163E-21  |
| TcCLB.506249.30  | hypothetical protein, conserved                          | -0,8708 | 1,453E-06  |
| TcCLB.509429.260 | hypothetical protein, conserved                          | -0,8709 | 7,408E-18  |

|                  |                                                               |         |            |
|------------------|---------------------------------------------------------------|---------|------------|
| TcCLB.508261.120 | hypothetical protein                                          | -0,8713 | 0,0007535  |
| TcCLB.511675.10  | trans-sialidase (pseudogene), putative                        | -0,8716 | 1,322E-14  |
| TcCLB.508317.80  | mannosyl-oligosaccharide 1,2-alpha-mannosidase IB, putative   | -0,8718 | 3,01E-20   |
| TcCLB.508297.14  | trans-sialidase (pseudogene), putative                        | -0,8719 | 6,173E-14  |
| TcCLB.503563.29  | hypothetical protein                                          | -0,8722 | 0,00002056 |
| TcCLB.506451.50  | trans-sialidase (pseudogene), putative                        | -0,8725 | 0,000653   |
| TcCLB.508621.51  | peptidylprolyl isomerase-like protein (pseudogene), putative  | -0,8727 | 0,03645    |
| TcCLB.509133.10  | trans-sialidase (pseudogene), putative                        | -0,8736 | 6,741E-06  |
| TcCLB.510901.220 | hypothetical protein, conserved                               | -0,8738 | 4,035E-18  |
| TcCLB.506319.20  | hypothetical protein, conserved                               | -0,8742 | 1,934E-17  |
| TcCLB.508173.129 | hypothetical protein, conserved                               | -0,8743 | 8,641E-21  |
| TcCLB.504021.20  | hypothetical protein, conserved                               | -0,8754 | 0,002352   |
| TcCLB.506445.70  | hypothetical protein, conserved                               | -0,8757 | 1,62E-12   |
| TcCLB.505965.10  | surface protease GP63, putative                               | -0,8757 | 0,004118   |
| TcCLB.504113.20  | MYH7B protein, putative                                       | -0,8759 | 5,892E-11  |
| TcCLB.504797.80  | endo-beta-N-acetylglucosaminidase, putative                   | -0,876  | 1,961E-26  |
| TcCLB.510463.221 | hypothetical protein, conserved (pseudogene)                  | -0,8761 | 0,0544     |
| TcCLB.503475.10  | dispersed gene family protein 1 (DGF-1, pseudogene), putative | -0,8767 | 0,2154     |
| TcCLB.508317.120 | mannosyl-oligosaccharide 1,2-alpha-mannosidase IB, putative   | -0,8769 | 2,564E-21  |
| TcCLB.507765.30  | hypothetical protein, conserved                               | -0,8769 | 1,471E-16  |
| TcCLB.511875.29  | mucin-associated surface protein (MASP, pseudogene), putative | -0,8774 | 3,217E-06  |
| TcCLB.503809.60  | glycerol uptake protein (pseudogene), putative                | -0,8775 | 1,456E-08  |
| TcCLB.506247.110 | hypothetical protein, conserved                               | -0,8777 | 3,895E-13  |
| TcCLB.505997.160 | retrotransposon hot spot protein (RHS, pseudogene), putative  | -0,878  | 1,536E-11  |
| TcCLB.508277.380 | hypothetical protein, conserved                               | -0,8781 | 9,218E-34  |
| TcCLB.511283.280 | Serine/threonine-protein kinase Nek1-related, putative        | -0,8781 | 4,182E-20  |
| TcCLB.510279.100 | hypothetical protein                                          | -0,8788 | 0,006878   |
| TcCLB.509717.40  | hypothetical protein, conserved                               | -0,8792 | 2,006E-21  |
| TcCLB.510303.80  | kinesin, putative                                             | -0,8794 | 1,023E-17  |
| TcCLB.507677.60  | hypothetical protein                                          | -0,8801 | 9,093E-24  |
| TcCLB.510159.10  | hypothetical protein, conserved                               | -0,8806 | 2,286E-12  |
| TcCLB.464807.10  | serine/threonine protein kinase, putative                     | -0,8814 | 1,373E-11  |
| TcCLB.503891.60  | hypothetical protein, conserved                               | -0,8825 | 3,403E-16  |
| TcCLB.507957.100 | mucin-associated surface protein (MASP, pseudogene), putative | -0,8829 | 0,0001149  |
| TcCLB.476733.10  | hypothetical protein, conserved                               | -0,883  | 4,724E-23  |
| TcCLB.509487.4   | DNA-directed RNA polymerase III, putative                     | -0,883  | 1,738E-06  |
| TcCLB.506899.30  | mucin-associated surface protein (MASP, pseudogene), putative | -0,8836 | 0,01705    |
| TcCLB.506755.220 | hypothetical protein, conserved                               | -0,884  | 6,841E-19  |
| TcCLB.422843.10  | trans-sialidase (pseudogene), putative                        | -0,884  | 1,367E-12  |
| TcCLB.506515.29  | trans-sialidase, putative                                     | -0,884  | 0,00002254 |
| TcCLB.511547.14  | mucin-associated surface protein (MASP), putative             | -0,8845 | 0,007394   |
| TcCLB.465323.10  | hypothetical protein (fragment)                               | -0,8846 | 0,008488   |
| TcCLB.510429.20  | tRNA (guanine-N(7)-)-methyltransferase, putative              | -0,8847 | 7,139E-10  |
| TcCLB.510819.20  | hypothetical protein, conserved                               | -0,8852 | 4,187E-10  |
| TcCLB.504005.50  | hypothetical protein, conserved                               | -0,8854 | 4,615E-16  |

|                  |                                                            |         |            |
|------------------|------------------------------------------------------------|---------|------------|
| TcCLB.508761.9   | mucin-associated surface protein (MASP, pseudogene), pu    | -0,886  | 0,0008035  |
| TcCLB.511677.20  | trans-sialidase, putative                                  | -0,8864 | 0,009606   |
| TcCLB.511861.130 | trans-sialidase (pseudogene), putative                     | -0,8867 | 2,938E-12  |
| TcCLB.508387.50  | bilobe protein, conserved                                  | -0,8873 | 1,91E-20   |
| TcCLB.507061.49  | hypothetical protein                                       | -0,8879 | 5,849E-13  |
| TcCLB.508187.30  | surface protease GP63, putative (fragment)                 | -0,8879 | 0,0008829  |
| TcCLB.508989.110 | hypothetical protein, conserved                            | -0,8882 | 2,203E-20  |
| TcCLB.509099.40  | hypothetical protein, conserved                            | -0,8882 | 8,109E-12  |
| TcCLB.504105.260 | bilobe protein, conserved                                  | -0,8894 | 0,0005528  |
| TcCLB.508799.30  | hypothetical protein, conserved                            | -0,8896 | 8,818E-19  |
| TcCLB.509695.230 | serine carboxypeptidase (CBP1), putative (fragment)        | -0,8897 | 3,604E-09  |
| TcCLB.509213.70  | ribulose-5-phosphate 3-epimerase, putative                 | -0,8899 | 3,773E-15  |
| TcCLB.431849.20  | hypothetical protein, conserved (fragment)                 | -0,8899 | 8,098E-06  |
| TcCLB.510885.80  | hypothetical protein, conserved                            | -0,8901 | 1,807E-15  |
| TcCLB.504027.4   | kinesin, putative (fragment)                               | -0,8902 | 6,137E-10  |
| TcCLB.506485.109 | cyclic nucleotide-binding domain containing protein, putat | -0,8905 | 8,991E-19  |
| TcCLB.506807.39  | hypothetical protein, conserved (fragment)                 | -0,8907 | 1,067E-09  |
| TcCLB.506357.20  | hypothetical protein, conserved                            | -0,8908 | 2,238E-21  |
| TcCLB.503875.40  | hypothetical protein                                       | -0,8916 | 0,001875   |
| TcCLB.506753.190 | hypothetical protein, conserved                            | -0,892  | 1,591E-15  |
| TcCLB.511559.10  | Present in the outer mitochondrial membrane proteome 1     | -0,892  | 0,02807    |
| TcCLB.506357.10  | hypothetical protein, conserved                            | -0,8924 | 2,625E-10  |
| TcCLB.508961.70  | hypothetical protein, conserved                            | -0,8926 | 1,909E-15  |
| TcCLB.511183.371 | hypothetical protein, conserved (pseudogene)               | -0,8935 | 0,008182   |
| TcCLB.506173.179 | trans-sialidase (pseudogene), putative                     | -0,8939 | 0,00001168 |
| TcCLB.506951.50  | mucin TcMUCII (pseudogene), putative                       | -0,8945 | 3,154E-09  |
| TcCLB.506963.100 | hypothetical protein, conserved                            | -0,8948 | 1,937E-07  |
| TcCLB.508221.150 | mucin-associated surface protein (MASP), putative          | -0,895  | 0,005614   |
| TcCLB.503871.10  | trans-sialidase (pseudogene), putative                     | -0,8954 | 0,0000302  |
| TcCLB.510029.90  | hypothetical protein, conserved                            | -0,8957 | 1,721E-17  |
| TcCLB.507095.20  | hypothetical protein                                       | -0,8967 | 0,003003   |
| TcCLB.510885.10  | hypothetical protein, conserved                            | -0,8973 | 2,031E-17  |
| TcCLB.510543.210 | retrotransposon hot spot protein (RHS, pseudogene), puta   | -0,8974 | 9,274E-06  |
| TcCLB.507093.20  | hypothetical protein, conserved                            | -0,8976 | 1,049E-11  |
| TcCLB.508165.34  | mucin TcMUC (pseudogene), putative                         | -0,8982 | 0,004489   |
| TcCLB.505997.100 | retrotransposon hot spot protein (RHS, pseudogene), puta   | -0,8984 | 2,004E-11  |
| TcCLB.510165.60  | expression site-associated gene (ESAG-like) protein, putat | -0,899  | 0,00000246 |
| TcCLB.506735.40  | hypothetical protein                                       | -0,8991 | 5,715E-15  |
| TcCLB.511025.60  | hypothetical protein                                       | -0,8993 | 4,172E-12  |
| TcCLB.503417.20  | hypothetical protein                                       | -0,8994 | 0,004158   |
| TcCLB.510533.70  | protein kinase, putative                                   | -0,9003 | 6,289E-15  |
| TcCLB.511237.130 | trans-sialidase, putative (fragment)                       | -0,9008 | 5,185E-06  |
| TcCLB.510143.120 | hypothetical protein, conserved                            | -0,9012 | 1,465E-10  |
| TcCLB.511037.40  | hypothetical protein, conserved                            | -0,9013 | 0,0002968  |
| TcCLB.506057.81  | mucin-associated surface protein (MASP, pseudogene), pu    | -0,9018 | 1,765E-14  |

|                  |                                                                   |         |            |
|------------------|-------------------------------------------------------------------|---------|------------|
| TcCLB.506173.270 | mucin TcMUCII, putative                                           | -0,902  | 0,008595   |
| TcCLB.509179.231 | trans-sialidase (pseudogene), putative                            | -0,9022 | 0,00006493 |
| TcCLB.509957.10  | hypothetical protein                                              | -0,903  | 0,00003915 |
| TcCLB.511491.130 | dolichyl pyrophosphate phosphatase, putative                      | -0,9039 | 2,571E-11  |
| TcCLB.510817.40  | hypothetical protein, conserved                                   | -0,9051 | 0,00002364 |
| TcCLB.507943.70  | hypothetical protein, conserved                                   | -0,9058 | 1,884E-14  |
| TcCLB.509695.140 | hypothetical protein, conserved                                   | -0,9074 | 4,086E-19  |
| TcCLB.510173.50  | hypothetical protein, conserved                                   | -0,9078 | 4,761E-08  |
| TcCLB.503639.20  | hypothetical protein, conserved                                   | -0,908  | 1,189E-07  |
| TcCLB.508313.140 | mucin-associated surface protein (MASP), putative                 | -0,9081 | 0,03559    |
| TcCLB.511127.290 | hypothetical protein, conserved                                   | -0,9088 | 1,345E-21  |
| TcCLB.503775.60  | hypothetical protein                                              | -0,9088 | 2,291E-06  |
| TcCLB.509487.10  | hypothetical protein                                              | -0,9098 | 5,15E-13   |
| TcCLB.508741.110 | hypothetical protein, conserved                                   | -0,91   | 3,363E-15  |
| TcCLB.510699.11  | surface protease GP63 (pseudogene), putative                      | -0,9106 | 0,01036    |
| TcCLB.507625.110 | chaperone DNAJ protein, putative                                  | -0,9116 | 1,915E-20  |
| TcCLB.511537.30  | hypothetical protein, conserved                                   | -0,9117 | 8,718E-25  |
| TcCLB.430061.9   | hypothetical protein, conserved                                   | -0,9121 | 0,00002157 |
| TcCLB.510279.30  | hypothetical protein                                              | -0,9122 | 0,0217     |
| TcCLB.507905.30  | trans-sialidase (pseudogene), putative                            | -0,9132 | 7,316E-27  |
| TcCLB.511517.37  | reticulon domain protein, putative                                | -0,914  | 2,396E-13  |
| TcCLB.508883.10  | mucin-associated surface protein (MASP, pseudogene), pi           | -0,915  | 0,05897    |
| TcCLB.506165.4   | hypothetical protein, conserved                                   | -0,9156 | 9,223E-15  |
| TcCLB.508207.40  | hypothetical protein, conserved                                   | -0,9157 | 1,799E-09  |
| TcCLB.506247.420 | hypothetical protein, conserved                                   | -0,9163 | 3,409E-08  |
| TcCLB.506741.30  | mucin-associated surface protein (MASP, pseudogene), pi           | -0,9164 | 0,06319    |
| TcCLB.511277.190 | ras-related GTP-binding protein, putative                         | -0,9173 | 3,168E-18  |
| TcCLB.504005.40  | hypothetical protein, conserved                                   | -0,9187 | 7,157E-13  |
| TcCLB.508493.20  | mucin-associated surface protein (MASP, pseudogene), pi           | -0,919  | 1,232E-08  |
| TcCLB.503673.9   | eukaryotic translation initiation factor 2-alpha kinase, putative | -0,9194 | 9,857E-10  |
| TcCLB.511149.80  | hypothetical protein                                              | -0,9196 | 0,0007458  |
| TcCLB.459389.10  | hypothetical protein, conserved (fragment)                        | -0,9197 | 1,23E-13   |
| TcCLB.510183.40  | hypothetical protein, conserved                                   | -0,9201 | 5,956E-09  |
| TcCLB.506501.401 | hypothetical protein, conserved (pseudogene)                      | -0,921  | 0,1159     |
| TcCLB.509167.90  | hypothetical protein, conserved                                   | -0,9219 | 2,523E-15  |
| TcCLB.507713.30  | heat shock protein 85, putative                                   | -0,9219 | 0,0007787  |
| TcCLB.511165.30  | hypothetical protein, conserved                                   | -0,9225 | 4,886E-09  |
| TcCLB.506885.450 | Kinesin-13 6, putative (KIN13-6)                                  | -0,9232 | 1,604E-17  |
| TcCLB.508539.150 | surface protease GP63 (pseudogene), putative                      | -0,9234 | 0,00009808 |
| TcCLB.510601.40  | tubulin tyrosine ligase (pseudogene), putative                    | -0,9235 | 2,988E-13  |
| TcCLB.506245.70  | mucin-associated surface protein (MASP, pseudogene), pi           | -0,9235 | 0,0000494  |
| TcCLB.511183.550 | mucin TcMUCII, putative                                           | -0,9239 | 0,01961    |
| TcCLB.509399.140 | hypothetical protein, conserved                                   | -0,9246 | 4,07E-14   |
| TcCLB.507993.350 | surface protease GP63, putative                                   | -0,9249 | 1,184E-06  |
| TcCLB.506569.45  | protein kinase (pseudogene), putative                             | -0,9253 | 8,069E-07  |



|                  |                                                          |         |            |
|------------------|----------------------------------------------------------|---------|------------|
| TcCLB.511127.230 | hypothetical protein, conserved                          | -0,9255 | 8,638E-13  |
| TcCLB.503887.20  | hypothetical protein                                     | -0,9267 | 3,619E-12  |
| TcCLB.506563.4   | hypothetical protein, conserved                          | -0,9268 | 7,506E-08  |
| TcCLB.507995.10  | trans-sialidase (pseudogene), putative                   | -0,9271 | 9,581E-14  |
| TcCLB.510769.130 | kinesin, putative                                        | -0,9272 | 1,948E-22  |
| TcCLB.508873.210 | mucin-associated surface protein (MASP), putative        | -0,9277 | 0,0003484  |
| TcCLB.507163.40  | mucin-associated surface protein (MASP), putative        | -0,9278 | 0,000237   |
| TcCLB.510205.50  | mucin-associated surface protein (MASP), putative        | -0,9278 | 0,008228   |
| TcCLB.503993.10  | trans-sialidase, Group I, putative                       | -0,9288 | 6,49E-14   |
| TcCLB.511851.5   | trans-sialidase, putative                                | -0,9288 | 0,002288   |
| TcCLB.509429.130 | hypothetical protein, conserved                          | -0,929  | 7,343E-15  |
| TcCLB.511667.80  | trans-sialidase (pseudogene), putative                   | -0,9292 | 1,213E-11  |
| TcCLB.506465.40  | protein kinase-like protein, putative                    | -0,9297 | 5,609E-13  |
| TcCLB.504023.10  | hypothetical protein, conserved                          | -0,9299 | 1,149E-12  |
| TcCLB.507993.310 | transporter, putative                                    | -0,9302 | 3,043E-10  |
| TcCLB.508047.60  | trans-sialidase, Group V, putative                       | -0,9302 | 6,855E-08  |
| TcCLB.510281.5   | mucin TcMUCII (pseudogene), putative                     | -0,9306 | 0,0367     |
| TcCLB.511161.10  | hypothetical protein, conserved (pseudogene)             | -0,9308 | 0,00000379 |
| TcCLB.506741.70  | surface protease GP63 (pseudogene), putative             | -0,9308 | 0,02654    |
| TcCLB.506285.110 | mucin-associated surface protein (MASP, pseudogene), pu  | -0,9314 | 0,002233   |
| TcCLB.506941.150 | sphingosine 1-phosphate lyase, putative (SPL)            | -0,9316 | 9,092E-13  |
| TcCLB.509895.60  | hypothetical protein, conserved                          | -0,9317 | 3,96E-07   |
| TcCLB.508225.20  | retrotransposon hot spot protein (RHS, pseudogene), puta | -0,9317 | 0,00001718 |
| TcCLB.510189.30  | surface protease GP63 (pseudogene), putative             | -0,9323 | 0,000914   |
| TcCLB.508905.10  | hypothetical protein, conserved (pseudogene)             | -0,9324 | 2,34E-11   |
| TcCLB.510211.10  | trans-sialidase (pseudogene), putative                   | -0,9326 | 0,08916    |
| TcCLB.510621.55  | mucin TcMUCII (pseudogene), putative                     | -0,9335 | 0,008535   |
| TcCLB.511269.40  | cAMP phosphodiesterase A, putative (PDEA)                | -0,9341 | 2,46E-10   |
| TcCLB.511859.100 | trans-sialidase (pseudogene), putative                   | -0,9347 | 1,722E-17  |
| TcCLB.511127.120 | cysteine peptidase, Clan CA, family C19, putative        | -0,9348 | 2,894E-12  |
| TcCLB.510029.80  | hypothetical protein, conserved                          | -0,935  | 1,408E-22  |
| TcCLB.509805.20  | cAMP phosphodiesterase A, putative (PDEA)                | -0,9351 | 3,225E-13  |
| TcCLB.508325.250 | trans-sialidase (pseudogene), putative                   | -0,936  | 8,686E-11  |
| TcCLB.509525.190 | hypothetical protein                                     | -0,9362 | 0,05421    |
| TcCLB.506285.40  | mucin-associated surface protein (MASP, pseudogene), pu  | -0,9363 | 1,272E-06  |
| TcCLB.508593.60  | hypothetical protein, conserved                          | -0,9366 | 1,634E-13  |
| TcCLB.509525.330 | hypothetical protein                                     | -0,937  | 0,007134   |
| TcCLB.511183.60  | trans-sialidase, Group V, putative                       | -0,9383 | 1,211E-06  |
| TcCLB.504115.5   | trans-sialidase (pseudogene), putative                   | -0,9386 | 3,587E-11  |
| TcCLB.504239.120 | trans-sialidase (pseudogene), putative                   | -0,939  | 0,005656   |
| TcCLB.508385.20  | hypothetical protein, conserved                          | -0,9391 | 6,321E-24  |
| TcCLB.506001.30  | hypothetical protein                                     | -0,9391 | 0,01288    |
| TcCLB.510175.30  | trans-sialidase (pseudogene), putative                   | -0,9395 | 5,117E-10  |
| TcCLB.506993.110 | mucin TcMUCII, putative                                  | -0,9402 | 0,0001012  |
| TcCLB.504057.170 | protein kinase, putative                                 | -0,941  | 5,239E-24  |

|                  |                                                            |         |            |
|------------------|------------------------------------------------------------|---------|------------|
| TcCLB.506009.10  | hypothetical protein, conserved                            | -0,9413 | 0,002726   |
| TcCLB.508389.130 | mucin-associated surface protein (MASP), putative          | -0,9413 | 0,06201    |
| TcCLB.509925.20  | mucin TcMUCII, putative                                    | -0,9423 | 6,273E-12  |
| TcCLB.509179.60  | hypothetical protein, conserved                            | -0,9428 | 4,073E-15  |
| TcCLB.509847.50  | trans-sialidase (pseudogene), putative                     | -0,9432 | 0,0001798  |
| TcCLB.509543.30  | hypothetical protein                                       | -0,9437 | 2,603E-16  |
| TcCLB.510303.70  | hypothetical protein, conserved                            | -0,9445 | 2,843E-29  |
| TcCLB.401961.10  | trans-sialidase, putative (fragment)                       | -0,9446 | 0,04932    |
| TcCLB.511127.240 | hypothetical protein, conserved                            | -0,9448 | 5,221E-06  |
| TcCLB.508885.30  | hypothetical protein                                       | -0,9452 | 0,03789    |
| TcCLB.511557.60  | hypothetical protein, conserved                            | -0,9455 | 8,979E-11  |
| TcCLB.507867.31  | mucin TcMUCII (pseudogene), putative                       | -0,9464 | 7,03E-12   |
| TcCLB.425969.5   | hypothetical protein                                       | -0,9465 | 1,406E-14  |
| TcCLB.506057.61  | elongation factor 1-gamma (EF-1-gamma, pseudogene),        | -0,9468 | 0,00006005 |
| TcCLB.511373.10  | mucin-associated surface protein (MASP, pseudogene), pu    | -0,9478 | 0,03193    |
| TcCLB.508879.4   | protein kinase C substrate protein, heavy chain, putative  | -0,9479 | 1,451E-15  |
| TcCLB.504737.20  | mucin-associated surface protein (MASP, pseudogene), pu    | -0,9482 | 0,00051    |
| TcCLB.506251.130 | ubiquitin-protein ligase (pseudogene), putative            | -0,9485 | 1,666E-20  |
| TcCLB.506967.27  | syntaxin binding protein (pseudogene), putative            | -0,9491 | 0,02403    |
| TcCLB.508243.36  | hypothetical protein                                       | -0,9495 | 0,1018     |
| TcCLB.509167.180 | kinesin, putative                                          | -0,9497 | 2,799E-19  |
| TcCLB.506597.36  | hypothetical protein, conserved (pseudogene)               | -0,9506 | 0,04229    |
| TcCLB.510545.40  | mucin TcMUCII, putative                                    | -0,9519 | 0,0001852  |
| TcCLB.510207.35  | mucin TcMUCII (pseudogene), putative                       | -0,9521 | 0,0001063  |
| TcCLB.510807.30  | hypothetical protein                                       | -0,9523 | 0,00001829 |
| TcCLB.503845.60  | trans-sialidase (pseudogene), putative                     | -0,9526 | 2,768E-19  |
| TcCLB.509291.10  | hypothetical protein                                       | -0,9527 | 0,001629   |
| TcCLB.506511.70  | hypothetical protein, conserved                            | -0,9528 | 5,127E-21  |
| TcCLB.509005.20  | hypothetical protein, conserved                            | -0,9528 | 1,532E-18  |
| TcCLB.503989.20  | hypothetical protein, conserved                            | -0,9536 | 6,856E-18  |
| TcCLB.510237.40  | mucin-associated surface protein (MASP, pseudogene), pu    | -0,9542 | 5,788E-06  |
| TcCLB.510583.140 | trans-sialidase (pseudogene), putative                     | -0,9542 | 0,0001275  |
| TcCLB.509085.136 | trans-sialidase (pseudogene), putative                     | -0,9542 | 0,001758   |
| TcCLB.504005.3   | RNA helicase, putative                                     | -0,9543 | 2,357E-20  |
| TcCLB.509493.100 | mucin-associated surface protein (MASP, pseudogene), pu    | -0,9546 | 1,875E-14  |
| TcCLB.506501.141 | syntaxin binding protein (pseudogene), putative            | -0,9547 | 0,007255   |
| TcCLB.508897.110 | macrophage infectivity potentiator, precursor, putative (N | -0,9549 | 8,952E-24  |
| TcCLB.507389.30  | hypothetical protein                                       | -0,9553 | 7,462E-23  |
| TcCLB.511555.50  | hypothetical protein, conserved                            | -0,9561 | 4,105E-15  |
| TcCLB.507959.270 | mucin TcMUCII, putative                                    | -0,9566 | 0,0009203  |
| TcCLB.447847.19  | retrotransposon hot spot protein (RHS, pseudogene), puta   | -0,9571 | 8,055E-11  |
| TcCLB.511593.30  | mucin-associated surface protein (MASP), putative          | -0,9579 | 3,536E-08  |
| TcCLB.506961.35  | trans-sialidase (pseudogene), putative                     | -0,9583 | 3,084E-09  |
| TcCLB.506655.20  | polyubiquitin (pseudogene), putative                       | -0,9583 | 0,001334   |
| TcCLB.508277.280 | hypothetical protein                                       | -0,9594 | 1,291E-13  |

|                  |                                                              |         |            |
|------------------|--------------------------------------------------------------|---------|------------|
| TcCLB.503783.50  | surface protease GP63 (pseudogene), putative                 | -0,9595 | 0,0007188  |
| TcCLB.511593.65  | hypothetical protein                                         | -0,9601 | 0,00129    |
| TcCLB.507939.50  | hypothetical protein, conserved                              | -0,9603 | 4,542E-22  |
| TcCLB.506039.10  | retrotransposon hot spot protein (RHS, pseudogene), puta     | -0,9603 | 1,499E-07  |
| TcCLB.510591.30  | retrotransposon hot spot protein (RHS, pseudogene), puta     | -0,9603 | 7,568E-07  |
| TcCLB.504031.20  | surface protease GP63 (pseudogene), putative                 | -0,9604 | 0,0001076  |
| TcCLB.508777.50  | hypothetical protein                                         | -0,9621 | 6,181E-19  |
| TcCLB.511077.130 | mucin TcMUCII, putative                                      | -0,9623 | 0,004277   |
| TcCLB.504013.110 | serine/threonine-protein phosphatase 2A, catalytic subuni    | -0,9627 | 1,675E-15  |
| TcCLB.508799.20  | chromatin binding protein, putative                          | -0,965  | 4,133E-21  |
| TcCLB.511873.20  | hypothetical protein                                         | -0,9664 | 0,0001309  |
| TcCLB.509683.110 | nucleobase transporter, putative                             | -0,9674 | 4,616E-13  |
| TcCLB.506943.10  | mitogen-activated protein kinase 5, putative                 | -0,9679 | 2,523E-08  |
| TcCLB.510329.130 | UDP-glucose:glycoprotein glucosyltransferase (tcgt1)         | -0,968  | 9,394E-20  |
| TcCLB.511255.604 | mucin TcMUCII, putative                                      | -0,968  | 0,0005563  |
| TcCLB.506973.25  | hypothetical protein                                         | -0,9687 | 0,00007315 |
| TcCLB.510611.70  | hypothetical protein, conserved                              | -0,9694 | 4,645E-21  |
| TcCLB.508161.40  | mucin TcMUCII (pseudogene), putative                         | -0,9697 | 0,0008741  |
| TcCLB.506331.20  | retrotransposon hot spot protein (RHS, pseudogene), puta     | -0,9704 | 5,852E-08  |
| TcCLB.508931.30  | UDP-Gal or UDP-GlcNAc-dependent glycosyltransferase, $\beta$ | -0,9708 | 5,956E-10  |
| TcCLB.507951.30  | receptor-type adenylate cyclase (pseudogene), putative       | -0,9709 | 4,553E-27  |
| TcCLB.506269.90  | mucin TcMUCII, putative                                      | -0,9721 | 8,659E-10  |
| TcCLB.507555.70  | trans-sialidase (pseudogene), putative                       | -0,9724 | 6,003E-11  |
| TcCLB.508873.300 | hypothetical protein                                         | -0,9757 | 0,008367   |
| TcCLB.506767.389 | surface protease GP63 (pseudogene), putative                 | -0,976  | 0,00313    |
| TcCLB.507639.50  | tRNA pseudouridine synthase A, putative                      | -0,9762 | 1,385E-18  |
| TcCLB.508277.320 | hypothetical protein, conserved                              | -0,9762 | 4,69E-15   |
| TcCLB.506321.160 | syntaxin binding protein (pseudogene), putative              | -0,9764 | 3,187E-08  |
| TcCLB.509693.90  | serine/threonine protein kinase, putative                    | -0,9767 | 3,2E-23    |
| TcCLB.510371.35  | hypothetical protein, conserved (pseudogene)                 | -0,9767 | 0,01068    |
| TcCLB.506139.60  | trans-sialidase (pseudogene), putative                       | -0,9771 | 1,495E-08  |
| TcCLB.507771.30  | hypothetical protein, conserved                              | -0,9772 | 2,841E-17  |
| TcCLB.509073.70  | phosphatidate cytidyltransferase-like protein, putative      | -0,9773 | 5,749E-20  |
| TcCLB.508047.20  | mucin-associated surface protein (MASP), putative            | -0,9776 | 0,00002695 |
| TcCLB.504039.25  | syntaxin binding protein (pseudogene), putative              | -0,9776 | 0,007765   |
| TcCLB.508227.51  | surface protease GP63 (pseudogene), putative                 | -0,9777 | 0,009587   |
| TcCLB.510361.110 | mucin-associated surface protein (MASP), putative            | -0,9788 | 0,00005108 |
| TcCLB.509779.20  | hypothetical protein, conserved                              | -0,9789 | 2,961E-11  |
| TcCLB.508165.115 | mucin TcMUCII (pseudogene), putative                         | -0,979  | 0,003199   |
| TcCLB.509163.30  | trans-sialidase (pseudogene), putative                       | -0,9793 | 5,66E-08   |
| TcCLB.511893.40  | receptor-type adenylate cyclase, putative (fragment)         | -0,9798 | 3,776E-06  |
| TcCLB.506613.70  | hypothetical protein                                         | -0,9801 | 0,00008338 |
| TcCLB.511797.110 | trans-sialidase, Group V, putative                           | -0,9803 | 1,363E-07  |
| TcCLB.509581.35  | hypothetical protein, conserved (pseudogene)                 | -0,9806 | 0,02166    |
| TcCLB.506703.110 | mucin-associated surface protein (MASP), putative            | -0,9814 | 3,156E-09  |

|                  |                                                         |         |            |
|------------------|---------------------------------------------------------|---------|------------|
| TcCLB.506599.320 | hypothetical protein                                    | -0,9815 | 0,03156    |
| TcCLB.511183.103 | mucin-associated surface protein (MASP, pseudogene), pi | -0,9816 | 0,00003498 |
| TcCLB.503551.20  | hypothetical protein, conserved                         | -0,982  | 0,03362    |
| TcCLB.505987.50  | adenosine kinase, putative                              | -0,9823 | 4,597E-21  |
| TcCLB.511127.50  | hypothetical protein, conserved                         | -0,9827 | 4,972E-20  |
| TcCLB.510867.19  | trans-sialidase (pseudogene), putative                  | -0,9837 | 3,964E-14  |
| TcCLB.511255.230 | mucin-associated surface protein (MASP, pseudogene), pi | -0,9839 | 0,000398   |
| TcCLB.508975.30  | UDP-Gal or UDP-GlcNAc-dependent glycosyltransferase, p  | -0,9843 | 0,003758   |
| TcCLB.506279.160 | mucin-associated surface protein (MASP, pseudogene), pi | -0,9844 | 0,001481   |
| TcCLB.508175.320 | hypothetical protein, conserved                         | -0,9848 | 1,399E-27  |
| TcCLB.503919.60  | hypothetical protein, conserved                         | -0,9855 | 6,062E-15  |
| TcCLB.511127.140 | DNA replication licensing factor MCM4, putative         | -0,9857 | 3,108E-24  |
| TcCLB.509255.10  | hypothetical protein, conserved                         | -0,9858 | 3,871E-25  |
| TcCLB.506921.10  | surface protease GP63, putative                         | -0,9874 | 2,521E-22  |
| TcCLB.507699.210 | hypothetical protein                                    | -0,9877 | 0,0003688  |
| TcCLB.511127.5   | RNA helicase, putative                                  | -0,9884 | 0,00002644 |
| TcCLB.506505.10  | hypothetical protein, conserved                         | -0,9885 | 1,074E-08  |
| TcCLB.506393.80  | trans-sialidase (pseudogene), putative                  | -0,9894 | 0,01871    |
| TcCLB.506227.150 | Flagellum matrix protein 458 (PKA-R)                    | -0,9897 | 1,714E-15  |
| TcCLB.506939.220 | mucin-associated surface protein (MASP), putative       | -0,9905 | 0,0008041  |
| TcCLB.511003.200 | hypothetical protein, conserved                         | -0,9906 | 2,029E-12  |
| TcCLB.506885.50  | hypothetical protein, conserved                         | -0,9912 | 1,032E-23  |
| TcCLB.510105.190 | hypothetical protein, conserved                         | -0,9919 | 1,263E-14  |
| TcCLB.506297.80  | hypothetical protein, conserved                         | -0,9921 | 4,938E-26  |
| TcCLB.506767.381 | syntaxin binding protein (pseudogene), putative         | -0,9924 | 0,005508   |
| TcCLB.507037.70  | hypothetical protein, conserved                         | -0,9927 | 1,525E-24  |
| TcCLB.398915.5   | trans-sialidase, putative (fragment)                    | -0,9931 | 1,748E-20  |
| TcCLB.506871.60  | hypothetical protein, conserved (pseudogene)            | -0,9933 | 5,954E-20  |
| TcCLB.508735.65  | trans-sialidase (pseudogene), putative                  | -0,9938 | 5,015E-11  |
| TcCLB.503407.10  | hypothetical protein, conserved                         | -0,9941 | 1,441E-16  |
| TcCLB.506961.25  | trans-sialidase, Group I, putative                      | -0,9952 | 8,741E-14  |
| TcCLB.509229.50  | hypothetical protein                                    | -0,9952 | 2,443E-08  |
| TcCLB.504239.40  | surface protease GP63 (pseudogene), putative            | -0,9957 | 0,03742    |
| TcCLB.508761.60  | hypothetical protein (pseudogene)                       | -0,9964 | 0,0003975  |
| TcCLB.510441.30  | trans-sialidase (pseudogene), putative                  | -0,9967 | 2,147E-15  |
| TcCLB.506321.90  | syntaxin binding protein (pseudogene), putative         | -0,9967 | 2,035E-06  |
| TcCLB.508433.30  | mucin-associated surface protein (MASP), putative       | -0,9969 | 0,079      |
| TcCLB.511255.580 | mucin-associated surface protein (MASP, pseudogene), pi | -0,9972 | 0,001749   |
| TcCLB.511063.110 | mucin-associated surface protein (MASP, pseudogene), pi | -0,9984 | 0,002409   |
| TcCLB.509571.70  | hypothetical protein, conserved                         | -0,999  | 1,911E-24  |
| TcCLB.507705.10  | hypothetical protein, conserved                         | -1      | 3,31E-08   |
| TcCLB.507951.60  | hypothetical protein, conserved                         | -1,001  | 1,11E-27   |
| TcCLB.506697.20  | cyclic nucleotide phosphodiesterase                     | -1,001  | 3,899E-17  |
| TcCLB.511859.140 | hypothetical protein                                    | -1,001  | 3,16E-14   |
| TcCLB.511547.10  | mucin-associated surface protein (MASP), putative       | -1,001  | 0,005717   |

|                  |                                                         |        |            |
|------------------|---------------------------------------------------------|--------|------------|
| TcCLB.510209.18  | mucin TcMUCII (pseudogene), putative                    | -1,001 | 0,006858   |
| TcCLB.510611.10  | hypothetical protein, conserved                         | -1,002 | 2,733E-20  |
| TcCLB.509777.10  | hypothetical protein                                    | -1,003 | 0,00001171 |
| TcCLB.506909.120 | hypothetical protein                                    | -1,003 | 0,01078    |
| TcCLB.510057.4   | hypothetical protein, conserved                         | -1,004 | 1,365E-14  |
| TcCLB.511875.9   | mucin-associated surface protein (MASP), putative       | -1,004 | 5,431E-10  |
| TcCLB.511725.80  | hypothetical protein                                    | -1,005 | 5,509E-23  |
| TcCLB.510525.70  | hypothetical protein, conserved                         | -1,005 | 1,182E-21  |
| TcCLB.433673.10  | trans-sialidase, putative (fragment)                    | -1,005 | 2,88E-18   |
| TcCLB.508097.81  | mucin TcMUCII, putative                                 | -1,005 | 0,0003877  |
| TcCLB.510889.200 | hypothetical protein, conserved                         | -1,008 | 2,088E-26  |
| TcCLB.506603.43  | hypothetical protein                                    | -1,008 | 2,445E-08  |
| TcCLB.510629.270 | syntaxin binding protein (pseudogene), putative         | -1,009 | 0,02266    |
| TcCLB.504223.20  | amino acid permease, putative                           | -1,01  | 1,199E-09  |
| TcCLB.510363.220 | mucin-associated surface protein (MASP), putative       | -1,012 | 0,001796   |
| TcCLB.511077.150 | hypothetical protein                                    | -1,012 | 0,01149    |
| TcCLB.508539.130 | trans-sialidase (pseudogene), putative                  | -1,013 | 6,185E-10  |
| TcCLB.508977.130 | mucin-associated surface protein (MASP), putative       | -1,013 | 2,112E-06  |
| TcCLB.504021.90  | hypothetical protein                                    | -1,014 | 2,46E-15   |
| TcCLB.511127.274 | hypothetical protein, conserved                         | -1,014 | 1,939E-13  |
| TcCLB.511107.5   | mucin TcMUCII, putative                                 | -1,014 | 4,815E-10  |
| TcCLB.506967.140 | mucin-associated surface protein (MASP, pseudogene), pi | -1,014 | 0,006609   |
| TcCLB.401469.10  | zinc finger protein 2, putative                         | -1,015 | 1,108E-23  |
| TcCLB.506009.30  | TPR-repeat-containing chaperone protein DNAJ, putative  | -1,015 | 2,537E-23  |
| TcCLB.509171.10  | hypothetical protein, conserved                         | -1,015 | 8,216E-11  |
| TcCLB.510835.10  | hypothetical protein, conserved                         | -1,015 | 9,657E-06  |
| TcCLB.510583.74  | mucin-associated surface protein (MASP, pseudogene), pi | -1,015 | 0,0001727  |
| TcCLB.510609.80  | hypothetical protein, conserved                         | -1,016 | 1,116E-10  |
| TcCLB.511625.160 | hypothetical protein                                    | -1,017 | 4,222E-06  |
| TcCLB.511377.20  | trans-sialidase (pseudogene), putative                  | -1,018 | 0,0007929  |
| TcCLB.507259.16  | protein kinase, putative (fragment)                     | -1,019 | 0,00172    |
| TcCLB.504147.240 | hypothetical protein, conserved                         | -1,02  | 1,182E-14  |
| TcCLB.506757.30  | hypothetical protein, conserved                         | -1,021 | 2,865E-27  |
| TcCLB.504105.180 | hypothetical protein, conserved                         | -1,021 | 1,713E-22  |
| TcCLB.508871.150 | mucin-associated surface protein (MASP), putative       | -1,021 | 6,233E-09  |
| TcCLB.503697.30  | bilobe protein, conserved                               | -1,022 | 6,076E-34  |
| TcCLB.510751.30  | hypothetical protein                                    | -1,022 | 8,192E-21  |
| TcCLB.503893.140 | hypothetical protein, conserved                         | -1,023 | 1,598E-19  |
| TcCLB.506973.50  | trans-sialidase (pseudogene), putative                  | -1,024 | 8,228E-06  |
| TcCLB.510699.89  | mucin-associated surface protein (MASP), putative       | -1,024 | 0,001348   |
| TcCLB.507483.60  | translation-associated element 2, putative              | -1,025 | 7,821E-35  |
| TcCLB.510237.110 | mucin TcMUCII, putative                                 | -1,025 | 0,00002175 |
| TcCLB.506321.150 | surface protease GP63 (pseudogene), putative            | -1,025 | 0,0002767  |
| TcCLB.506613.30  | hypothetical protein                                    | -1,026 | 0,002587   |
| TcCLB.510497.114 | mucin-associated surface protein (MASP, pseudogene), pi | -1,026 | 0,004739   |

|                  |                                                          |        |            |
|------------------|----------------------------------------------------------|--------|------------|
| TcCLB.507067.70  | hypothetical protein                                     | -1,026 | 0,004746   |
| TcCLB.509213.90  | hypothetical protein, conserved                          | -1,027 | 8,325E-14  |
| TcCLB.508431.60  | hypothetical protein, conserved (pseudogene)             | -1,027 | 7,225E-07  |
| TcCLB.511189.70  | hypothetical protein, conserved                          | -1,027 | 0,0009525  |
| TcCLB.508245.21  | surface protease GP63 (pseudogene), putative             | -1,027 | 0,02936    |
| TcCLB.510889.210 | hypothetical protein, conserved                          | -1,028 | 1,269E-14  |
| TcCLB.506599.35  | hypothetical protein, conserved (pseudogene)             | -1,028 | 0,00009048 |
| TcCLB.506895.5   | hypothetical protein                                     | -1,028 | 0,005442   |
| TcCLB.509083.9   | ATP-dependent DEAD/H RNA helicase, putative              | -1,029 | 2,432E-13  |
| TcCLB.510279.90  | mucin-associated surface protein (MASP, pseudogene), p   | -1,029 | 0,0003241  |
| TcCLB.507429.6   | hypothetical protein                                     | -1,029 | 0,009669   |
| TcCLB.508761.270 | mucin-associated surface protein (MASP), putative        | -1,03  | 1,261E-07  |
| TcCLB.511597.40  | mucin-associated surface protein (MASP), putative        | -1,03  | 0,002606   |
| TcCLB.510257.30  | ribulose-5-phosphate 3-epimerase, putative               | -1,031 | 2,273E-15  |
| TcCLB.506965.170 | trans-sialidase, Group V, putative                       | -1,031 | 0,00000301 |
| TcCLB.510167.37  | trans-sialidase (pseudogene), putative                   | -1,031 | 0,0006231  |
| TcCLB.509685.20  | syntaxin binding protein (pseudogene), putative          | -1,031 | 0,001635   |
| TcCLB.504219.10  | hypothetical protein, conserved (pseudogene)             | -1,032 | 0,007032   |
| TcCLB.507065.108 | mucin-associated surface protein (MASP, pseudogene), p   | -1,033 | 0,00006725 |
| TcCLB.504201.44  | mucin TcMUCII, putative                                  | -1,033 | 0,005056   |
| TcCLB.510279.50  | mucin TcMUCII (pseudogene), putative                     | -1,033 | 0,005769   |
| TcCLB.509195.50  | mucin-associated surface protein (MASP), putative        | -1,034 | 5,163E-07  |
| TcCLB.503717.50  | mucin TcMUCII (pseudogene), putative                     | -1,034 | 0,0003016  |
| TcCLB.509525.244 | hypothetical protein                                     | -1,034 | 0,01467    |
| TcCLB.510129.30  | procyclic form surface phosphoprotein, putative          | -1,035 | 5,001E-27  |
| TcCLB.508993.20  | homocysteine S-methyltransferase, putative               | -1,035 | 1,973E-17  |
| TcCLB.508909.10  | OSM3-like kinesin, putative                              | -1,036 | 1,968E-26  |
| TcCLB.509605.20  | hypothetical protein, conserved                          | -1,037 | 3,306E-29  |
| TcCLB.508557.20  | amino acid transporter, putative                         | -1,038 | 2,467E-13  |
| TcCLB.506297.250 | palmitoyl acyltransferase 7, putative                    | -1,039 | 9,381E-33  |
| TcCLB.510361.240 | mucin-associated surface protein (MASP, pseudogene), p   | -1,039 | 0,0003567  |
| TcCLB.508883.20  | hypothetical protein                                     | -1,039 | 0,003983   |
| TcCLB.507965.10  | receptor-type adenylate cyclase, putative                | -1,041 | 1,107E-15  |
| TcCLB.506423.10  | mucin-associated surface protein (MASP), putative        | -1,041 | 0,0004058  |
| TcCLB.507611.131 | protein kinase (pseudogene), putative                    | -1,042 | 2,834E-13  |
| TcCLB.507979.30  | trans-sialidase, Group I, putative                       | -1,042 | 2,451E-11  |
| TcCLB.510503.89  | mucin-associated surface protein (MASP, pseudogene), p   | -1,042 | 0,01464    |
| TcCLB.510187.370 | hypothetical protein, conserved                          | -1,043 | 5,252E-18  |
| TcCLB.511395.120 | UDP-Gal or UDP-GlcNAc-dependent glycosyltransferase, p   | -1,043 | 2,828E-07  |
| TcCLB.511277.470 | hypothetical protein, conserved                          | -1,044 | 1,387E-10  |
| TcCLB.511385.40  | hypothetical protein                                     | -1,044 | 6,62E-08   |
| TcCLB.411427.10  | hypothetical protein, conserved                          | -1,044 | 8,327E-07  |
| TcCLB.506329.50  | mucin TcMUCII, putative                                  | -1,044 | 0,002384   |
| TcCLB.506499.10  | hypothetical protein, conserved (pseudogene)             | -1,044 | 0,01417    |
| TcCLB.509663.60  | retrotransposon hot spot protein (RHS, pseudogene), puta | -1,045 | 1,436E-16  |

|                  |                                                         |        |            |
|------------------|---------------------------------------------------------|--------|------------|
| TcCLB.508999.80  | mucin-associated surface protein (MASP), putative       | -1,045 | 0,006894   |
| TcCLB.507607.10  | surface protease GP63 (pseudogene), putative            | -1,045 | 0,02077    |
| TcCLB.511149.50  | mucin TcMUCII, putative                                 | -1,047 | 0,0009643  |
| TcCLB.506741.40  | mucin TcMUCII (pseudogene), putative                    | -1,047 | 0,003459   |
| TcCLB.507847.30  | mucin TcMUCII (pseudogene), putative                    | -1,048 | 0,00002911 |
| TcCLB.511183.505 | trans-sialidase (pseudogene), putative                  | -1,05  | 0,0005326  |
| TcCLB.507937.10  | mucin TcMUCII, putative                                 | -1,05  | 0,0114     |
| TcCLB.511303.9   | hypothetical protein, conserved                         | -1,051 | 4,831E-18  |
| TcCLB.510729.30  | hypothetical protein, conserved                         | -1,051 | 8,272E-17  |
| TcCLB.506227.205 | hypothetical protein, conserved                         | -1,051 | 1,59E-16   |
| TcCLB.503587.3   | mucin TcMUC (pseudogene), putative                      | -1,051 | 0,01794    |
| TcCLB.510885.70  | hypothetical protein, conserved                         | -1,052 | 7,073E-25  |
| TcCLB.509639.10  | procyclic form surface phosphoprotein, putative         | -1,052 | 1,941E-21  |
| TcCLB.506229.70  | ATP-dependent DEAD/H RNA helicase, putative             | -1,053 | 3,389E-18  |
| TcCLB.506843.120 | trans-sialidase (pseudogene), putative                  | -1,053 | 2,491E-07  |
| TcCLB.503779.10  | hypothetical protein, conserved                         | -1,054 | 1,955E-13  |
| TcCLB.511599.85  | elongation factor 1-gamma (EF-1-gamma, pseudogene),     | -1,055 | 0,0276     |
| TcCLB.509791.30  | hypothetical protein, conserved                         | -1,056 | 1,574E-34  |
| TcCLB.511555.110 | hypothetical protein, conserved                         | -1,056 | 4,241E-29  |
| TcCLB.506755.5   | hypothetical protein, conserved                         | -1,056 | 8,024E-08  |
| TcCLB.508887.24  | mucin-associated surface protein (MASP, pseudogene), pi | -1,056 | 0,006923   |
| TcCLB.507859.80  | trans-sialidase (pseudogene), putative                  | -1,056 | 0,01471    |
| TcCLB.510809.10  | mucin TcMUCII, putative                                 | -1,057 | 0,0001815  |
| TcCLB.508277.110 | cAMP specific phosphodiesterase, putative               | -1,058 | 2,042E-16  |
| TcCLB.504005.6   | RNA-binding protein, putative                           | -1,058 | 1,47E-13   |
| TcCLB.511051.30  | nucleobase transporter, putative                        | -1,059 | 1,063E-28  |
| TcCLB.508221.970 | mucin-associated surface protein (MASP), putative       | -1,059 | 8,518E-07  |
| TcCLB.506909.46  | hypothetical protein                                    | -1,06  | 7,315E-06  |
| TcCLB.510021.140 | mucin TcMUCII (pseudogene), putative                    | -1,06  | 0,00003644 |
| TcCLB.508541.40  | surface protease GP63 (pseudogene), putative            | -1,06  | 0,00006288 |
| TcCLB.507877.10  | mucin-associated surface protein (MASP, pseudogene), pi | -1,06  | 0,0006088  |
| TcCLB.508717.60  | trans-sialidase, Group I, putative                      | -1,061 | 2,161E-09  |
| TcCLB.511629.40  | hypothetical protein, conserved                         | -1,062 | 1,6E-14    |
| TcCLB.507059.20  | trans-sialidase, Group V, putative                      | -1,062 | 5,052E-10  |
| TcCLB.510205.15  | mucin TcMUCII (pseudogene), putative                    | -1,062 | 0,0002606  |
| TcCLB.510275.283 | mucin TcMUCII (pseudogene), putative                    | -1,062 | 0,001616   |
| TcCLB.510443.20  | hypothetical protein, conserved                         | -1,063 | 3,198E-20  |
| TcCLB.507669.150 | glycosomal membrane protein, putative                   | -1,064 | 1,172E-15  |
| TcCLB.507683.10  | hypothetical protein, conserved                         | -1,064 | 2,346E-13  |
| TcCLB.509553.20  | ATP-dependent chaperone, putative                       | -1,065 | 6,411E-19  |
| TcCLB.511753.50  | hypothetical protein, conserved                         | -1,065 | 1,637E-13  |
| TcCLB.506209.50  | trans-sialidase (pseudogene), putative                  | -1,065 | 4,098E-09  |
| TcCLB.511183.610 | hypothetical protein                                    | -1,065 | 0,003296   |
| TcCLB.510173.20  | hypothetical protein, conserved                         | -1,066 | 1,309E-15  |
| TcCLB.506265.180 | hypothetical protein, conserved                         | -1,066 | 5,027E-11  |

|                  |                                                         |        |            |
|------------------|---------------------------------------------------------|--------|------------|
| TcCLB.508723.50  | hypothetical protein, conserved                         | -1,067 | 2,243E-29  |
| TcCLB.503989.10  | zinc finger protein 2, putative                         | -1,068 | 9,533E-26  |
| TcCLB.511611.40  | hypothetical protein                                    | -1,068 | 0,0004654  |
| TcCLB.508209.10  | hypothetical protein, conserved (pseudogene)            | -1,069 | 2,18E-08   |
| TcCLB.506865.79  | hypothetical protein, conserved (fragment)              | -1,069 | 0,0001826  |
| TcCLB.507185.26  | mucin-associated surface protein (MASP, pseudogene), pi | -1,071 | 1,128E-14  |
| TcCLB.503887.79  | hypothetical protein, conserved                         | -1,072 | 1,849E-18  |
| TcCLB.504031.30  | mucin-associated surface protein (MASP), putative       | -1,072 | 1,185E-10  |
| TcCLB.510583.80  | surface protease GP63 (pseudogene), putative            | -1,072 | 0,0002643  |
| TcCLB.509399.120 | hypothetical protein, conserved                         | -1,073 | 1,589E-35  |
| TcCLB.510889.330 | hypothetical protein, conserved                         | -1,073 | 4,679E-19  |
| TcCLB.511127.420 | hypothetical protein, conserved                         | -1,074 | 1,219E-21  |
| TcCLB.506803.20  | trans-sialidase (pseudogene), putative                  | -1,074 | 2,058E-15  |
| TcCLB.511843.30  | trans-sialidase (pseudogene), putative                  | -1,074 | 0,0003101  |
| TcCLB.503779.50  | hypothetical protein, conserved                         | -1,075 | 6,438E-12  |
| TcCLB.510885.110 | hypothetical protein, conserved                         | -1,076 | 2,256E-33  |
| TcCLB.509975.41  | mucin TcMUC, putative                                   | -1,076 | 6,635E-07  |
| TcCLB.508219.20  | trans-sialidase, Group V, putative                      | -1,076 | 3,951E-06  |
| TcCLB.506465.5   | hypothetical protein                                    | -1,078 | 1,134E-13  |
| TcCLB.510643.90  | mucin-associated surface protein (MASP, pseudogene), pi | -1,078 | 4,368E-13  |
| TcCLB.511233.170 | elongation factor 1-gamma (EF-1-gamma, pseudogene),     | -1,078 | 0,008125   |
| TcCLB.511837.110 | hypothetical protein, conserved                         | -1,079 | 6,731E-28  |
| TcCLB.510335.10  | hypothetical protein, conserved                         | -1,081 | 2,331E-28  |
| TcCLB.503973.240 | mucin-associated surface protein (MASP), putative       | -1,081 | 0,00001791 |
| TcCLB.510197.229 | trans-sialidase, putative                               | -1,082 | 5,728E-09  |
| TcCLB.510621.70  | mucin TcMUCII, putative                                 | -1,082 | 0,0006706  |
| TcCLB.511171.90  | mucin-associated surface protein (MASP), putative       | -1,082 | 0,006102   |
| TcCLB.508365.140 | hypothetical protein                                    | -1,083 | 0,00001854 |
| TcCLB.508509.70  | mucin TcMUCII, putative                                 | -1,083 | 0,01183    |
| TcCLB.509113.10  | mucin-associated surface protein (MASP, pseudogene), pi | -1,084 | 2,271E-06  |
| TcCLB.506269.59  | hypothetical protein (pseudogene)                       | -1,086 | 7,729E-11  |
| TcCLB.503841.70  | aspartate aminotransferase, putative                    | -1,086 | 5,454E-09  |
| TcCLB.508221.750 | trans-sialidase, Group V, putative                      | -1,086 | 1,569E-06  |
| TcCLB.510279.349 | mucin-associated surface protein (MASP), putative       | -1,086 | 0,000495   |
| TcCLB.508885.20  | mucin TcMUCI, putative                                  | -1,086 | 0,003824   |
| TcCLB.508153.230 | hypothetical protein, conserved                         | -1,087 | 1,85E-30   |
| TcCLB.511725.30  | hypothetical protein, conserved                         | -1,087 | 1,658E-12  |
| TcCLB.503827.87  | hypothetical protein, conserved (pseudogene)            | -1,087 | 0,001436   |
| TcCLB.509697.15  | mucin-associated surface protein (MASP, pseudogene), pi | -1,087 | 0,003062   |
| TcCLB.511127.150 | hypothetical protein, conserved                         | -1,089 | 6,597E-25  |
| TcCLB.509395.40  | hypothetical protein, conserved                         | -1,089 | 3,868E-14  |
| TcCLB.504213.100 | hypothetical protein, conserved                         | -1,09  | 4,877E-15  |
| TcCLB.511163.20  | cdc2-related kinase 8, putative (CRK8)                  | -1,091 | 8,718E-25  |
| TcCLB.506457.4   | hypothetical protein, conserved                         | -1,091 | 0,0000233  |
| TcCLB.508161.26  | mucin TcMUCII (pseudogene), putative                    | -1,091 | 0,0003956  |



|                  |                                                         |        |            |
|------------------|---------------------------------------------------------|--------|------------|
| TcCLB.510833.10  | trans-sialidase, putative                               | -1,091 | 0,0004571  |
| TcCLB.503479.60  | surface protease GP63, putative                         | -1,092 | 2,959E-12  |
| TcCLB.511277.110 | citrate synthase, putative                              | -1,092 | 0,0000154  |
| TcCLB.508089.10  | trans-sialidase, Group I, putative                      | -1,093 | 1,78E-16   |
| TcCLB.508175.370 | glutamine synthetase, putative                          | -1,093 | 2,209E-14  |
| TcCLB.507041.60  | syntaxin binding protein (pseudogene), putative         | -1,094 | 7,055E-11  |
| TcCLB.508873.390 | trans-sialidase, Group V, putative                      | -1,094 | 5,529E-07  |
| TcCLB.510089.5   | mucin TcMUCII (pseudogene), putative                    | -1,095 | 0,02027    |
| TcCLB.507933.29  | hypothetical protein, conserved (fragment)              | -1,096 | 1,936E-08  |
| TcCLB.404073.10  | hypothetical protein, conserved                         | -1,097 | 2,771E-07  |
| TcCLB.506269.25  | hypothetical protein                                    | -1,098 | 0,00001507 |
| TcCLB.510621.30  | mucin TcMUCII, putative                                 | -1,099 | 0,001297   |
| TcCLB.511117.30  | trans-sialidase, Group II, putative                     | -1,1   | 3,097E-09  |
| TcCLB.506319.40  | hypothetical protein                                    | -1,1   | 0,00001398 |
| TcCLB.506595.21  | hypothetical protein                                    | -1,101 | 6,972E-16  |
| TcCLB.506001.40  | trans-sialidase, Group V, putative                      | -1,101 | 1,158E-09  |
| TcCLB.506767.127 | hypothetical protein, conserved (pseudogene)            | -1,101 | 0,009557   |
| TcCLB.511255.540 | mucin-associated surface protein (MASP), putative       | -1,102 | 0,0002425  |
| TcCLB.507859.101 | hypothetical protein, conserved (pseudogene)            | -1,103 | 0,002161   |
| TcCLB.504239.365 | surface protease GP63 (pseudogene), putative            | -1,103 | 0,01196    |
| TcCLB.510693.50  | trans-sialidase (pseudogene), putative                  | -1,104 | 0,00001185 |
| TcCLB.433237.10  | hypothetical protein                                    | -1,104 | 0,01257    |
| TcCLB.506765.46  | mucin-associated surface protein (MASP, pseudogene), pu | -1,105 | 3,561E-15  |
| TcCLB.508927.10  | hypothetical protein, conserved                         | -1,105 | 7,85E-15   |
| TcCLB.511259.9   | mucin TcMUCl, putative                                  | -1,105 | 0,01333    |
| TcCLB.511505.30  | hypothetical protein, conserved                         | -1,106 | 2,006E-16  |
| TcCLB.506905.10  | hypothetical protein, conserved                         | -1,106 | 1,028E-14  |
| TcCLB.510197.64  | mucin-associated surface protein (MASP, pseudogene), pu | -1,106 | 4,737E-09  |
| TcCLB.506321.101 | hypothetical protein, conserved (pseudogene)            | -1,106 | 0,00007686 |
| TcCLB.508175.9   | hypothetical protein, conserved (fragment)              | -1,108 | 1,967E-22  |
| TcCLB.508873.70  | mucin-associated surface protein (MASP, pseudogene), pu | -1,108 | 0,00001946 |
| TcCLB.508777.200 | hypothetical protein, conserved                         | -1,109 | 2,047E-08  |
| TcCLB.509525.210 | hypothetical protein                                    | -1,109 | 0,00002082 |
| TcCLB.503601.20  | hypothetical protein                                    | -1,11  | 0,00007261 |
| TcCLB.511099.180 | trans-sialidase (pseudogene), putative                  | -1,11  | 0,0002794  |
| TcCLB.507283.39  | trans-sialidase (pseudogene), putative                  | -1,112 | 1,533E-23  |
| TcCLB.506351.35  | hypothetical protein, conserved                         | -1,112 | 1,942E-11  |
| TcCLB.509993.20  | mucin TcMUCl, putative                                  | -1,112 | 1,363E-07  |
| TcCLB.510275.21  | surface protease GP63 (pseudogene), putative            | -1,112 | 0,005138   |
| TcCLB.504021.10  | G1 cyclin CycE4, putative (CYC5)                        | -1,113 | 1,257E-37  |
| TcCLB.507951.150 | guanine deaminase, putative                             | -1,113 | 2,027E-31  |
| TcCLB.509897.160 | trans-sialidase (pseudogene), putative                  | -1,113 | 2,961E-11  |
| TcCLB.509261.40  | UDP-Gal or UDP-GlcNAc-dependent glycosyltransferase, p  | -1,113 | 3,507E-09  |
| TcCLB.510555.10  | mucin-associated surface protein (MASP, pseudogene), pu | -1,113 | 2,251E-06  |
| TcCLB.511367.330 | hypothetical protein, conserved                         | -1,114 | 4,206E-15  |

|                  |                                                          |        |            |
|------------------|----------------------------------------------------------|--------|------------|
| TcCLB.508071.60  | mucin-associated surface protein (MASP), putative        | -1,114 | 7,061E-15  |
| TcCLB.506955.170 | trans-sialidase (pseudogene), putative                   | -1,114 | 1,311E-07  |
| TcCLB.511403.40  | mucin-associated surface protein (MASP, pseudogene), pu  | -1,114 | 0,0001221  |
| TcCLB.506001.24  | hypothetical protein (pseudogene)                        | -1,114 | 0,01756    |
| TcCLB.509293.10  | mucin TcMUCII, putative                                  | -1,115 | 4,995E-09  |
| TcCLB.511149.4   | mucin-associated surface protein (MASP, pseudogene), pu  | -1,115 | 0,0003495  |
| TcCLB.410275.9   | mucin-associated surface protein (MASP), putative        | -1,115 | 0,06375    |
| TcCLB.511173.150 | mucin-associated surface protein (MASP), putative        | -1,117 | 6,186E-08  |
| TcCLB.510393.10  | hypothetical protein, conserved                          | -1,118 | 1,644E-20  |
| TcCLB.486901.10  | endonuclease/exonuclease/phosphatase, putative           | -1,118 | 1,186E-12  |
| TcCLB.508461.70  | hypothetical protein                                     | -1,118 | 6,972E-12  |
| TcCLB.508367.70  | trans-sialidase (pseudogene), putative                   | -1,118 | 0,00001084 |
| TcCLB.506461.10  | hypothetical protein, conserved                          | -1,118 | 0,01274    |
| TcCLB.506755.240 | hypothetical protein, conserved                          | -1,119 | 6,276E-09  |
| TcCLB.506993.86  | mucin-associated surface protein (MASP, pseudogene), pu  | -1,119 | 0,00001015 |
| TcCLB.507809.119 | hypothetical protein, conserved                          | -1,112 | 7,491E-32  |
| TcCLB.507021.30  | hypothetical protein, conserved                          | -1,112 | 6,279E-17  |
| TcCLB.503825.10  | protein kinase (pseudogene), putative                    | -1,112 | 2,652E-14  |
| TcCLB.506279.90  | mucin TcMUCII, putative                                  | -1,112 | 0,002212   |
| TcCLB.510465.110 | mucin-associated surface protein (MASP, pseudogene), pu  | -1,121 | 1,988E-06  |
| TcCLB.508121.155 | mucin TcMUCII (pseudogene), putative                     | -1,121 | 0,0002544  |
| TcCLB.506409.110 | hypothetical protein                                     | -1,122 | 1,956E-07  |
| TcCLB.508865.2   | hypothetical protein, conserved (fragment)               | -1,125 | 0,0002543  |
| TcCLB.508895.20  | hypothetical protein, conserved                          | -1,126 | 3,928E-35  |
| TcCLB.511553.71  | syntaxin binding protein (pseudogene), putative          | -1,126 | 0,00001436 |
| TcCLB.510681.30  | lipase, putative                                         | -1,127 | 3,431E-23  |
| TcCLB.503463.30  | protein kinase, putative                                 | -1,127 | 1,346E-21  |
| TcCLB.511451.90  | mucin-associated surface protein (MASP), putative        | -1,127 | 0,000152   |
| TcCLB.504039.140 | surface protease GP63 (pseudogene), putative             | -1,127 | 0,001549   |
| TcCLB.509399.100 | hypothetical protein, conserved                          | -1,129 | 1,04E-43   |
| TcCLB.509977.90  | hypothetical protein                                     | -1,129 | 1,019E-21  |
| TcCLB.507073.20  | hypothetical protein, conserved                          | -1,129 | 2,518E-14  |
| TcCLB.505959.10  | mucin TcMUCII, putative                                  | -1,129 | 0,00008026 |
| TcCLB.511553.80  | hypothetical protein, conserved                          | -1,113 | 0,002982   |
| TcCLB.507015.30  | trans-sialidase (pseudogene), putative                   | -1,131 | 2,634E-16  |
| TcCLB.508011.99  | mucin TcMUCII (pseudogene), putative                     | -1,131 | 0,001958   |
| TcCLB.509767.20  | hypothetical protein, conserved                          | -1,132 | 1,131E-13  |
| TcCLB.510583.180 | mucin-associated surface protein (MASP, pseudogene), pu  | -1,132 | 0,000135   |
| TcCLB.508435.30  | mucin-associated surface protein (MASP, pseudogene), pu  | -1,132 | 0,0002406  |
| TcCLB.508761.110 | trans-sialidase, Group VI, putative                      | -1,133 | 1,238E-08  |
| TcCLB.510625.130 | hypothetical protein                                     | -1,133 | 0,01192    |
| TcCLB.507357.71  | hypothetical protein                                     | -1,134 | 0,0004684  |
| TcCLB.504153.260 | hypothetical protein, conserved                          | -1,135 | 8,989E-48  |
| TcCLB.509275.20  | mucin-associated surface protein (MASP), putative (fragn | -1,135 | 0,00001361 |
| TcCLB.510807.20  | hypothetical protein                                     | -1,135 | 0,001139   |

|                  |                                                              |        |            |
|------------------|--------------------------------------------------------------|--------|------------|
| TcCLB.510575.160 | hypothetical protein                                         | -1,136 | 1,039E-23  |
| TcCLB.506435.200 | hypothetical protein, conserved                              | -1,136 | 2,834E-18  |
| TcCLB.508883.15  | trans-sialidase (pseudogene), putative                       | -1,136 | 0,003189   |
| TcCLB.506755.140 | ATP-dependent helicase, putative                             | -1,137 | 1,181E-33  |
| TcCLB.506905.4   | proliferator-activated receptor-interacting protein (PRIP) i | -1,137 | 1,528E-12  |
| TcCLB.510709.60  | mucin-associated surface protein (MASP), putative            | -1,137 | 0,03416    |
| TcCLB.511183.280 | mucin-associated surface protein (MASP), putative            | -1,138 | 8,345E-06  |
| TcCLB.464415.10  | hypothetical protein                                         | -1,138 | 0,0001113  |
| TcCLB.508741.20  | hypothetical protein, conserved                              | -1,139 | 4,738E-18  |
| TcCLB.507411.10  | trans-sialidase, Group V, putative                           | -1,139 | 2,381E-10  |
| TcCLB.507835.35  | trans-sialidase (pseudogene), putative                       | -1,139 | 2,797E-07  |
| TcCLB.510397.20  | trans-sialidase (pseudogene), putative                       | -1,139 | 0,0001395  |
| TcCLB.507683.34  | hypothetical protein, conserved                              | -1,14  | 2,121E-12  |
| TcCLB.507835.10  | trans-sialidase (pseudogene), putative                       | -1,141 | 4,073E-15  |
| TcCLB.511077.160 | mucin TcMUCII, putative                                      | -1,141 | 0,0003503  |
| TcCLB.508359.50  | mucin TcMUCII, putative                                      | -1,141 | 0,001387   |
| TcCLB.504081.409 | mucin TcMUCII (pseudogene), putative                         | -1,141 | 0,008497   |
| TcCLB.503579.10  | hypothetical protein, conserved                              | -1,142 | 2,092E-26  |
| TcCLB.506609.50  | hypothetical protein                                         | -1,142 | 0,0003864  |
| TcCLB.506909.90  | mucin-associated surface protein (MASP, pseudogene), pu      | -1,142 | 0,000478   |
| TcCLB.511061.20  | mucin-associated surface protein (MASP, pseudogene), pu      | -1,142 | 0,002102   |
| TcCLB.507641.104 | small GTPase, putative                                       | -1,143 | 3,127E-20  |
| TcCLB.510061.11  | mucin-associated surface protein (MASP), putative            | -1,143 | 6,442E-07  |
| TcCLB.503497.10  | mucin-associated surface protein (MASP, pseudogene), pu      | -1,144 | 2,652E-15  |
| TcCLB.504787.90  | mucin-associated surface protein (MASP, pseudogene), pu      | -1,144 | 1,971E-10  |
| TcCLB.504209.10  | conserved protein, unknown function                          | -1,145 | 1,666E-15  |
| TcCLB.506585.100 | hypothetical protein                                         | -1,145 | 5,602E-10  |
| TcCLB.507537.40  | metacaspase, putative                                        | -1,145 | 9,124E-08  |
| TcCLB.507771.85  | hypothetical protein                                         | -1,146 | 4,072E-15  |
| TcCLB.507213.40  | trans-sialidase, Group II, putative                          | -1,146 | 0,00001209 |
| TcCLB.506247.355 | hypothetical protein, conserved                              | -1,148 | 2,947E-13  |
| TcCLB.505997.65  | trans-sialidase (pseudogene), putative                       | -1,148 | 2,115E-12  |
| TcCLB.505949.169 | mucin-associated surface protein (MASP), putative (fragn     | -1,148 | 0,006154   |
| TcCLB.504071.110 | ama1 protein, putative                                       | -1,149 | 4,204E-10  |
| TcCLB.507729.50  | mucin-associated surface protein (MASP), putative (fragn     | -1,149 | 1,336E-08  |
| TcCLB.510759.190 | hypothetical protein, conserved                              | -1,15  | 1,877E-41  |
| TcCLB.506789.20  | trans-sialidase, Group V, putative                           | -1,15  | 0,0001092  |
| TcCLB.510491.60  | trans-sialidase, Group IV, putative                          | -1,151 | 4,022E-14  |
| TcCLB.511255.169 | mucin-associated surface protein (MASP), putative            | -1,151 | 0,00007182 |
| TcCLB.507059.50  | trans-sialidase, Group V, putative                           | -1,152 | 2,345E-10  |
| TcCLB.511163.50  | hypothetical protein, conserved                              | -1,153 | 1,294E-24  |
| TcCLB.508933.40  | hypothetical protein                                         | -1,154 | 6,641E-10  |
| TcCLB.503867.5   | hypothetical protein, conserved                              | -1,154 | 2,494E-07  |
| TcCLB.508777.150 | hypothetical protein                                         | -1,155 | 6,057E-22  |
| TcCLB.509217.40  | trans-sialidase, Group V, putative                           | -1,155 | 6,424E-10  |

|                  |                                                          |        |            |
|------------------|----------------------------------------------------------|--------|------------|
| TcCLB.504031.40  | hypothetical protein                                     | -1,155 | 0,0003726  |
| TcCLB.506599.91  | surface protease GP63 (pseudogene), putative             | -1,155 | 0,002827   |
| TcCLB.506989.300 | receptor-type adenylate cyclase (pseudogene), putative   | -1,156 | 5,438E-36  |
| TcCLB.508323.90  | hypothetical protein, conserved                          | -1,156 | 3,486E-12  |
| TcCLB.508433.90  | mucin-associated surface protein (MASP), putative        | -1,156 | 0,02663    |
| TcCLB.509419.150 | mucin-associated surface protein (MASP), putative        | -1,157 | 1,271E-08  |
| TcCLB.506965.90  | mucin TcMUCII, putative                                  | -1,157 | 4,022E-07  |
| TcCLB.510377.190 | mucin TcMUCII, putative                                  | -1,158 | 5,985E-08  |
| TcCLB.503733.20  | 6-phosphofructo-2-kinase/fructose-2,6-biphosphatase, pu  | -1,159 | 4,423E-31  |
| TcCLB.511259.130 | mucin TcMUCII, putative                                  | -1,159 | 1,505E-06  |
| TcCLB.506139.130 | hypothetical protein                                     | -1,159 | 0,002209   |
| TcCLB.506297.50  | kinesin, putative                                        | -1,161 | 8,384E-63  |
| TcCLB.503609.50  | trans-sialidase, Group VI, putative                      | -1,161 | 2,617E-09  |
| TcCLB.511057.20  | mucin TcMUCII, putative                                  | -1,161 | 9,445E-07  |
| TcCLB.504765.15  | succinyl-coA:3-ketoacid-coenzyme A transferase (pseudog  | -1,163 | 6,275E-14  |
| TcCLB.506495.50  | hypothetical protein                                     | -1,164 | 2,228E-19  |
| TcCLB.511649.100 | amino acid permease, putative                            | -1,164 | 1,331E-18  |
| TcCLB.511167.60  | hypothetical protein, conserved                          | -1,165 | 3,466E-47  |
| TcCLB.507941.60  | hypothetical protein, conserved                          | -1,167 | 2,047E-15  |
| TcCLB.509681.10  | hypothetical protein, conserved                          | -1,167 | 0,0003679  |
| TcCLB.506501.177 | hypothetical protein, conserved (pseudogene)             | -1,167 | 0,002765   |
| TcCLB.507681.100 | ATP-binding cassette protein, putative                   | -1,168 | 1,583E-22  |
| TcCLB.506487.50  | trans-sialidase (pseudogene), putative                   | -1,168 | 1,927E-20  |
| TcCLB.507809.140 | hypothetical protein, conserved                          | -1,169 | 2,716E-16  |
| TcCLB.503973.50  | mucin-associated surface protein (MASP), putative        | -1,169 | 0,0000158  |
| TcCLB.503533.40  | mucin-associated surface protein (MASP), putative        | -1,169 | 0,001914   |
| TcCLB.505699.10  | trans-sialidase, putative                                | -1,17  | 8,91E-16   |
| TcCLB.509937.120 | hypothetical protein, conserved                          | -1,17  | 8,479E-11  |
| TcCLB.510089.20  | surface protease GP63, putative                          | -1,17  | 0,09569    |
| TcCLB.509333.10  | trans-sialidase, Group III, putative                     | -1,171 | 9,41E-37   |
| TcCLB.506653.40  | trans-sialidase (pseudogene), putative                   | -1,172 | 2,87E-24   |
| TcCLB.509505.60  | hypothetical protein                                     | -1,172 | 9,804E-24  |
| TcCLB.509429.300 | hypothetical protein, conserved                          | -1,173 | 4,082E-27  |
| TcCLB.510163.40  | surface protease GP63 (pseudogene), putative             | -1,173 | 2,096E-26  |
| TcCLB.507015.59  | expression site-associated gene (ESAG-like, pseudogene), | -1,174 | 3,235E-16  |
| TcCLB.508409.160 | thymine-7-hydroxylase, putative                          | -1,174 | 7,387E-16  |
| TcCLB.509685.27  | surface protease GP63 (pseudogene), putative             | -1,174 | 0,001074   |
| TcCLB.511365.90  | hypothetical protein, conserved                          | -1,175 | 1,806E-29  |
| TcCLB.506767.209 | syntaxin binding protein (pseudogene), putative          | -1,175 | 0,0001615  |
| TcCLB.510275.80  | trans-sialidase (pseudogene), putative                   | -1,177 | 1,345E-07  |
| TcCLB.509515.20  | UDP-Gal or UDP-GlcNAc-dependent glycosyltransferase, p   | -1,177 | 0,00007427 |
| TcCLB.507677.140 | hypothetical protein, conserved                          | -1,177 | 0,008372   |
| TcCLB.511197.40  | trans-sialidase (pseudogene), putative                   | -1,179 | 8,095E-12  |
| TcCLB.506335.20  | trans-sialidase (pseudogene), putative                   | -1,179 | 6,398E-09  |
| TcCLB.508305.9   | trans-sialidase, putative                                | -1,179 | 9,094E-07  |

|                  |                                                             |        |            |
|------------------|-------------------------------------------------------------|--------|------------|
| TcCLB.509081.40  | surface protease GP63 (pseudogene), putative                | -1,179 | 0,00003418 |
| TcCLB.510291.14  | mitochondrial carrier protein, putative                     | -1,18  | 1,083E-23  |
| TcCLB.506763.361 | syntaxin binding protein (pseudogene), putative             | -1,18  | 0,0001509  |
| TcCLB.508659.18  | mitochondrial carrier protein, putative                     | -1,181 | 3,686E-22  |
| TcCLB.508029.59  | kinesin, putative                                           | -1,181 | 1,673E-11  |
| TcCLB.507255.50  | UDP-Gal or UDP-GlcNAc-dependent glycosyltransferase, $\rho$ | -1,182 | 8,944E-12  |
| TcCLB.507915.10  | hypothetical protein, conserved                             | -1,182 | 5,034E-11  |
| TcCLB.509663.30  | thymidylate kinase, putative                                | -1,182 | 6,417E-11  |
| TcCLB.507943.60  | hypothetical protein, conserved                             | -1,183 | 4,046E-31  |
| TcCLB.507145.84  | mucin-associated surface protein (MASP, pseudogene), $\rho$ | -1,183 | 3,225E-11  |
| TcCLB.510625.30  | mucin-associated surface protein (MASP, pseudogene), $\rho$ | -1,183 | 7,486E-07  |
| TcCLB.510715.140 | mucin-associated surface protein (MASP, pseudogene), $\rho$ | -1,183 | 1,339E-06  |
| TcCLB.507973.20  | hypothetical protein                                        | -1,183 | 0,00000163 |
| TcCLB.510139.20  | surface protease GP63, putative                             | -1,184 | 1,3E-13    |
| TcCLB.505609.40  | trans-sialidase, Group V, putative                          | -1,184 | 0,0001283  |
| TcCLB.506457.50  | serine/threonine protein kinase, putative                   | -1,185 | 1,933E-29  |
| TcCLB.438923.10  | hypothetical protein (fragment)                             | -1,185 | 7,433E-23  |
| TcCLB.506741.10  | trans-sialidase (pseudogene), putative                      | -1,185 | 7,82E-14   |
| TcCLB.506751.50  | trans-sialidase, Group II, putative                         | -1,186 | 7,85E-12   |
| TcCLB.506353.10  | trans-sialidase, Group II, putative                         | -1,186 | 6,852E-08  |
| TcCLB.511057.15  | hypothetical protein                                        | -1,186 | 0,00001585 |
| TcCLB.508701.10  | ZIP Zn transporter, putative                                | -1,187 | 9,934E-16  |
| TcCLB.507165.50  | cysteine synthase, putative                                 | -1,187 | 4,614E-15  |
| TcCLB.510887.40  | hypothetical protein, conserved                             | -1,189 | 1,217E-21  |
| TcCLB.506337.171 | ubiquitin (pseudogene), putative                            | -1,189 | 3,293E-08  |
| TcCLB.511553.180 | hypothetical protein                                        | -1,189 | 0,007146   |
| TcCLB.511871.70  | hypothetical protein, conserved                             | -1,191 | 3,305E-21  |
| TcCLB.510699.20  | mucin-associated surface protein (MASP, pseudogene), $\rho$ | -1,191 | 1,064E-12  |
| TcCLB.506767.10  | hypothetical protein, conserved (pseudogene)                | -1,191 | 0,00172    |
| TcCLB.509317.100 | hypothetical protein, conserved                             | -1,192 | 5,703E-22  |
| TcCLB.506393.40  | trans-sialidase (pseudogene), putative                      | -1,193 | 0,002275   |
| TcCLB.506603.35  | trans-sialidase (pseudogene), putative                      | -1,194 | 6,517E-13  |
| TcCLB.511373.20  | mucin TcMUCII, putative                                     | -1,194 | 2,333E-12  |
| TcCLB.503697.120 | hypothetical protein, conserved                             | -1,195 | 3,366E-41  |
| TcCLB.511529.59  | hypothetical protein                                        | -1,195 | 4,179E-23  |
| TcCLB.510239.80  | trans-sialidase, Group V, putative                          | -1,195 | 1,063E-08  |
| TcCLB.510011.9   | mucin-associated surface protein (MASP), putative           | -1,195 | 3,808E-06  |
| TcCLB.507681.230 | hypothetical protein, conserved                             | -1,196 | 2,157E-29  |
| TcCLB.509295.30  | trans-sialidase (pseudogene), putative                      | -1,196 | 6,804E-12  |
| TcCLB.507237.10  | trans-sialidase, Group V, putative                          | -1,197 | 2,439E-08  |
| TcCLB.463297.10  | hypothetical protein (fragment)                             | -1,197 | 5,069E-07  |
| TcCLB.507711.110 | procyclic form surface phosphoprotein, putative             | -1,198 | 2,925E-23  |
| TcCLB.508593.130 | hypothetical protein, conserved                             | -1,2   | 6,816E-48  |
| TcCLB.507507.20  | ADP-ribosylation factor GTPase activating protein 1, putat  | -1,201 | 2,894E-25  |
| TcCLB.511593.80  | mucin-associated surface protein (MASP), putative           | -1,201 | 4,006E-15  |

|                   |                                                               |        |            |
|-------------------|---------------------------------------------------------------|--------|------------|
| TcCLB.427789.20   | Paraflagellar Rod Proteome Component 9, putative (PFC9)       | -1,201 | 2,556E-14  |
| TcCLB.510887.60   | hypothetical protein, conserved                               | -1,202 | 1,299E-26  |
| TcCLB.511461.30   | hypothetical protein, conserved                               | -1,202 | 5,516E-10  |
| TcCLB.509897.110  | trans-sialidase, Group V, putative                            | -1,203 | 3,423E-15  |
| TcCLB.508221.1010 | mucin-associated surface protein (MASP), putative             | -1,203 | 3,005E-14  |
| TcCLB.510013.13   | syntaxin binding protein (pseudogene), putative               | -1,204 | 0,0001199  |
| TcCLB.510363.280  | mucin-associated surface protein (MASP), putative             | -1,204 | 0,0002783  |
| TcCLB.510305.30   | lipin, putative                                               | -1,205 | 1,633E-49  |
| TcCLB.508871.100  | hypothetical protein                                          | -1,205 | 0,01418    |
| TcCLB.511907.180  | surface protease GP63 (pseudogene), putative                  | -1,206 | 1,282E-10  |
| TcCLB.508219.60   | mucin TcMUCII (pseudogene), putative                          | -1,206 | 0,0001749  |
| TcCLB.511025.30   | mitogen-activated protein kinase, putative                    | -1,207 | 7,537E-34  |
| TcCLB.510173.10   | hypothetical protein, conserved                               | -1,207 | 7,219E-24  |
| TcCLB.511877.20   | mucin-associated surface protein (MASP), putative             | -1,207 | 5,434E-16  |
| TcCLB.507799.10   | mannosyl-oligosaccharide 1,2-alpha-mannosidase IB, putative   | -1,207 | 6,233E-09  |
| TcCLB.505479.10   | mucin-associated surface protein (MASP, pseudogene), putative | -1,207 | 0,0008255  |
| TcCLB.503717.40   | mucin-associated surface protein (MASP, pseudogene), putative | -1,208 | 3,38E-08   |
| TcCLB.511173.380  | mucin TcMUCII (pseudogene), putative                          | -1,208 | 0,001763   |
| TcCLB.506767.371  | hypothetical protein, conserved (pseudogene)                  | -1,208 | 0,00593    |
| TcCLB.511821.150  | hypothetical protein, conserved                               | -1,209 | 1,855E-27  |
| TcCLB.508159.60   | mucin TcMUCII, putative                                       | -1,21  | 3,583E-07  |
| TcCLB.510015.5    | hypothetical protein, conserved (pseudogene)                  | -1,21  | 0,00005963 |
| TcCLB.508389.138  | mucin TcMUCII, putative                                       | -1,21  | 0,0003836  |
| TcCLB.506693.30   | RNA-binding protein 6, putative                               | -1,21  | 0,0004234  |
| TcCLB.507251.10   | hypothetical protein, conserved                               | -1,211 | 3,419E-29  |
| TcCLB.507811.100  | amino acid permease, putative                                 | -1,212 | 6,233E-09  |
| TcCLB.511553.60   | hypothetical protein                                          | -1,213 | 0,00005991 |
| TcCLB.506601.21   | syntaxin binding protein (pseudogene), putative               | -1,213 | 0,00025    |
| TcCLB.504039.80   | surface protease GP63 (pseudogene), putative                  | -1,213 | 0,0006725  |
| TcCLB.507173.30   | mucin-associated surface protein (MASP, pseudogene), putative | -1,214 | 2,584E-08  |
| TcCLB.507241.30   | arginine kinase                                               | -1,214 | 3,86E-07   |
| TcCLB.506229.64   | hypothetical protein, conserved                               | -1,215 | 5,103E-16  |
| TcCLB.508707.50   | hypothetical protein, conserved                               | -1,216 | 1,735E-30  |
| TcCLB.511151.60   | hypothetical protein                                          | -1,218 | 6,639E-35  |
| TcCLB.508163.270  | mucin-associated surface protein (MASP), putative             | -1,218 | 9,704E-07  |
| TcCLB.511867.10   | hypothetical protein, conserved                               | -1,219 | 2,837E-33  |
| TcCLB.506519.140  | hypothetical protein, conserved (pseudogene)                  | -1,219 | 7,316E-27  |
| TcCLB.508605.31   | trans-sialidase (pseudogene), putative                        | -1,219 | 4,767E-24  |
| TcCLB.509251.80   | trans-sialidase, Group V, putative                            | -1,219 | 9,291E-11  |
| TcCLB.507237.310  | surface protease GP63 (pseudogene), putative                  | -1,219 | 0,00005204 |
| TcCLB.507559.110  | surface protease GP63, putative                               | -1,22  | 4,142E-18  |
| TcCLB.506667.40   | mucin-associated surface protein (MASP), putative             | -1,22  | 0,0002433  |
| TcCLB.503795.10   | hypothetical protein, conserved                               | -1,222 | 0,00002764 |
| TcCLB.510047.70   | hypothetical protein (pseudogene)                             | -1,224 | 0,000126   |
| TcCLB.510627.60   | mucin-associated surface protein (MASP), putative             | -1,225 | 0,0005231  |

|                  |                                                              |        |            |
|------------------|--------------------------------------------------------------|--------|------------|
| TcCLB.506741.150 | surface protease GP63 (pseudogene), putative                 | -1,225 | 0,004824   |
| TcCLB.504005.60  | hypothetical protein, conserved                              | -1,226 | 1,169E-12  |
| TcCLB.509085.31  | trans-sialidase (pseudogene), putative                       | -1,226 | 3,209E-09  |
| TcCLB.508739.60  | histone H4, putative                                         | -1,227 | 8,98E-20   |
| TcCLB.506133.125 | hypothetical protein, conserved (pseudogene)                 | -1,227 | 0,007705   |
| TcCLB.511175.40  | mucin TcMUCII, putative                                      | -1,229 | 1,577E-10  |
| TcCLB.503531.10  | hypothetical protein, conserved                              | -1,229 | 3,271E-07  |
| TcCLB.508325.290 | trans-sialidase (pseudogene), putative                       | -1,23  | 3,724E-48  |
| TcCLB.506813.59  | mucin TcMUC (pseudogene), putative                           | -1,232 | 3,823E-06  |
| TcCLB.510889.290 | hypothetical protein                                         | -1,233 | 1,354E-16  |
| TcCLB.506499.60  | hypothetical protein                                         | -1,233 | 0,005997   |
| TcCLB.510679.70  | lipase, putative                                             | -1,234 | 1,018E-10  |
| TcCLB.508409.310 | hypothetical protein, conserved                              | -1,235 | 2,764E-25  |
| TcCLB.506965.160 | hypothetical protein                                         | -1,235 | 0,00003296 |
| TcCLB.511233.150 | hypothetical protein                                         | -1,236 | 0,0004182  |
| TcCLB.506763.140 | hypothetical protein                                         | -1,236 | 0,004012   |
| TcCLB.504197.10  | hypothetical protein                                         | -1,237 | 0,001331   |
| TcCLB.510085.54  | mucin TcMUCII (pseudogene), putative                         | -1,239 | 0,00002367 |
| TcCLB.507677.150 | G1 cyclin CycE4, putative (CYC5)                             | -1,24  | 7,831E-36  |
| TcCLB.508673.20  | UDP-Gal or UDP-GlcNAc-dependent glycosyltransferase, $\beta$ | -1,24  | 1,507E-22  |
| TcCLB.504239.161 | mucin-associated surface protein (MASP, pseudogene), $\mu$   | -1,24  | 5,949E-06  |
| TcCLB.511565.15  | hypothetical protein                                         | -1,24  | 0,00001623 |
| TcCLB.509937.130 | protein kinase, putative                                     | -1,24  | 0,006484   |
| TcCLB.505267.60  | trans-sialidase (pseudogene), putative                       | -1,241 | 2,544E-48  |
| TcCLB.506705.70  | beta-fructofuranosidase-like protein (fragment)              | -1,241 | 2,514E-28  |
| TcCLB.507471.31  | elongation factor 1-gamma (EF-1-gamma, pseudogene), $\mu$    | -1,241 | 0,005325   |
| TcCLB.511875.70  | mucin TcMUCII (pseudogene), putative                         | -1,242 | 1,117E-20  |
| TcCLB.506499.120 | hypothetical protein                                         | -1,242 | 0,000851   |
| TcCLB.506179.20  | hypothetical protein, conserved                              | -1,243 | 1,37E-22   |
| TcCLB.508455.30  | hypothetical protein                                         | -1,243 | 0,0004454  |
| TcCLB.510303.299 | hypothetical protein                                         | -1,245 | 5,814E-27  |
| TcCLB.510337.30  | adenylosuccinate lyase, putative (ADSL)                      | -1,246 | 1,985E-45  |
| TcCLB.507959.240 | syntaxin binding protein (pseudogene), putative              | -1,246 | 0,00001868 |
| TcCLB.440363.19  | Vacuolar iron transporter 1, putative (fragment) (VIT1)      | -1,248 | 2,583E-23  |
| TcCLB.506245.230 | mucin-associated surface protein (MASP, pseudogene), $\mu$   | -1,249 | 0,000199   |
| TcCLB.506599.400 | trans-sialidase (pseudogene), putative                       | -1,249 | 0,0006712  |
| TcCLB.508313.122 | trans-sialidase (pseudogene), putative                       | -1,249 | 0,008732   |
| TcCLB.506741.110 | mucin TcMUCII, putative                                      | -1,25  | 9,074E-23  |
| TcCLB.511549.20  | trans-sialidase (pseudogene), putative                       | -1,25  | 1,454E-10  |
| TcCLB.506965.40  | trans-sialidase (pseudogene), putative                       | -1,251 | 6,496E-09  |
| TcCLB.511615.10  | trans-sialidase, Group V, putative                           | -1,251 | 0,00002261 |
| TcCLB.508081.110 | trans-sialidase (pseudogene), putative                       | -1,252 | 2,69E-12   |
| TcCLB.439991.10  | trans-sialidase (pseudogene), putative                       | -1,252 | 2,934E-08  |
| TcCLB.503787.20  | mucin TcMUCII, putative                                      | -1,253 | 2,548E-06  |
| TcCLB.506767.21  | syntaxin binding protein (pseudogene), putative              | -1,255 | 0,00000424 |

|                  |                                                         |        |            |
|------------------|---------------------------------------------------------|--------|------------|
| TcCLB.506781.30  | mucin TcMUCII, putative                                 | -1,256 | 6,892E-08  |
| TcCLB.504239.390 | syntaxin binding protein (pseudogene), putative         | -1,256 | 0,0001708  |
| TcCLB.510021.60  | hypothetical protein                                    | -1,256 | 0,00216    |
| TcCLB.506227.100 | hypothetical protein, conserved                         | -1,257 | 1,614E-13  |
| TcCLB.511817.210 | protein kinase, putative                                | -1,258 | 1,39E-28   |
| TcCLB.509251.20  | trans-sialidase, Group V, putative                      | -1,258 | 8,68E-13   |
| TcCLB.509525.260 | hypothetical protein                                    | -1,258 | 1,493E-12  |
| TcCLB.505949.100 | trans-sialidase (pseudogene), putative                  | -1,259 | 5,832E-14  |
| TcCLB.507071.170 | mucin TcMUCII, putative                                 | -1,259 | 3,108E-11  |
| TcCLB.510363.260 | mucin-associated surface protein (MASP), putative       | -1,259 | 0,0004846  |
| TcCLB.506059.10  | trans-sialidase, putative                               | -1,26  | 6,355E-10  |
| TcCLB.508221.180 | trans-sialidase, Group V, putative                      | -1,26  | 4,006E-07  |
| TcCLB.510275.390 | mucin TcMUCII (pseudogene), putative                    | -1,26  | 0,0006762  |
| TcCLB.506423.20  | mucin TcMUCII, putative                                 | -1,26  | 0,0055     |
| TcCLB.507953.210 | hypothetical protein                                    | -1,261 | 0,00001947 |
| TcCLB.507121.20  | trans-sialidase, Group VII, putative                    | -1,262 | 2,926E-26  |
| TcCLB.504777.50  | mucin-associated surface protein (MASP, pseudogene), pi | -1,263 | 2,952E-12  |
| TcCLB.506801.10  | surface protease GP63 (pseudogene), putative            | -1,263 | 5,891E-06  |
| TcCLB.505939.65  | hypothetical protein, conserved                         | -1,264 | 2,581E-11  |
| TcCLB.506763.40  | hypothetical protein                                    | -1,264 | 0,00001604 |
| TcCLB.509349.10  | trans-sialidase (pseudogene), putative                  | -1,264 | 0,0001419  |
| TcCLB.510025.200 | syntaxin binding protein (pseudogene), putative         | -1,265 | 0,00000192 |
| TcCLB.510373.100 | hypothetical protein, conserved (pseudogene)            | -1,265 | 0,0001251  |
| TcCLB.504103.3   | hypothetical protein, conserved (fragment)              | -1,267 | 2,017E-24  |
| TcCLB.508081.20  | hypothetical protein                                    | -1,267 | 0,0001839  |
| TcCLB.503859.25  | surface protease GP63 (pseudogene), putative            | -1,267 | 0,001359   |
| TcCLB.508661.70  | Enriched in surface-labeled proteome protein 18 (ESP18) | -1,269 | 2,945E-25  |
| TcCLB.508221.730 | 90 kDa surface protein, putative                        | -1,269 | 0,0008515  |
| TcCLB.511099.210 | mucin TcMUCII, putative                                 | -1,269 | 0,0008792  |
| TcCLB.511643.40  | trans-sialidase, Group V, putative                      | -1,27  | 7,97E-16   |
| TcCLB.508043.10  | trans-sialidase, putative                               | -1,27  | 3,976E-15  |
| TcCLB.507071.164 | mucin TcMUCII (pseudogene), putative                    | -1,27  | 0,0008042  |
| TcCLB.503699.11  | mucin-associated surface protein (MASP, pseudogene), pi | -1,271 | 0,009053   |
| TcCLB.504229.50  | trans-sialidase (pseudogene), putative                  | -1,272 | 2,014E-15  |
| TcCLB.510407.9   | protein kinase, putative                                | -1,272 | 2,671E-10  |
| TcCLB.506601.31  | surface protease GP63 (pseudogene), putative            | -1,272 | 0,001201   |
| TcCLB.510025.230 | hypothetical protein                                    | -1,273 | 0,0009728  |
| TcCLB.508777.130 | hypothetical protein, conserved                         | -1,274 | 5,198E-52  |
| TcCLB.510015.50  | mucin TcMUC (pseudogene), putative                      | -1,274 | 2,481E-10  |
| TcCLB.503859.10  | syntaxin binding protein (pseudogene), putative         | -1,275 | 0,0005312  |
| TcCLB.507237.210 | mucin TcMUCII, putative                                 | -1,277 | 1,481E-12  |
| TcCLB.510373.40  | hypothetical protein                                    | -1,278 | 0,0007589  |
| TcCLB.504239.80  | syntaxin binding protein (pseudogene), putative         | -1,279 | 0,00005799 |
| TcCLB.510015.10  | hypothetical protein                                    | -1,279 | 0,00009232 |
| TcCLB.398009.20  | trans-sialidase (pseudogene), putative                  | -1,28  | 8,578E-28  |



|                  |                                                          |        |            |
|------------------|----------------------------------------------------------|--------|------------|
| TcCLB.503507.35  | mucin-associated surface protein (MASP, pseudogene), pu  | -1,28  | 2,175E-12  |
| TcCLB.511427.19  | conserved protein, unknown function (fragment)           | -1,28  | 0,0000107  |
| TcCLB.506793.50  | hypothetical protein, conserved                          | -1,281 | 3,434E-30  |
| TcCLB.510193.10  | mucin-associated surface protein (MASP), putative        | -1,281 | 2,161E-08  |
| TcCLB.510275.360 | mucin TcMUCII (pseudogene), putative                     | -1,281 | 0,0002743  |
| TcCLB.511317.79  | OSM3-like kinesin, putative                              | -1,282 | 7,647E-21  |
| TcCLB.507957.36  | syntaxin binding protein (pseudogene), putative          | -1,282 | 6,867E-07  |
| TcCLB.510251.19  | hypothetical protein, conserved                          | -1,283 | 1,705E-30  |
| TcCLB.509751.28  | mucin-associated surface protein (MASP, pseudogene), pu  | -1,283 | 2,968E-28  |
| TcCLB.508221.530 | trans-sialidase (pseudogene), putative                   | -1,283 | 0,0000127  |
| TcCLB.508165.425 | mucin TcMUC (pseudogene), putative                       | -1,283 | 0,00004384 |
| TcCLB.439307.9   | hypothetical protein, conserved                          | -1,283 | 0,01097    |
| TcCLB.504081.110 | mucin TcMUCII (pseudogene), putative                     | -1,284 | 0,0000197  |
| TcCLB.508977.99  | mucin-associated surface protein (MASP, pseudogene), pu  | -1,285 | 0,00003357 |
| TcCLB.509513.10  | trans-sialidase, Group II, putative                      | -1,287 | 6,647E-08  |
| TcCLB.506459.210 | mucin TcMUCII, putative                                  | -1,287 | 0,00008117 |
| TcCLB.511555.30  | hypothetical protein, conserved                          | -1,288 | 1,209E-19  |
| TcCLB.507491.20  | surface antigen TASV, putative                           | -1,289 | 1,74E-65   |
| TcCLB.510359.490 | trans-sialidase (pseudogene), putative                   | -1,289 | 1,058E-11  |
| TcCLB.509925.40  | trans-sialidase (pseudogene), putative                   | -1,29  | 3,772E-11  |
| TcCLB.503461.40  | succinyl-CoA:3-ketoacid-coenzyme-A transferase (pseudog  | -1,291 | 1,066E-08  |
| TcCLB.511255.350 | trans-sialidase, Group V, putative                       | -1,291 | 8,768E-07  |
| TcCLB.505919.20  | trans-sialidase, Group II, putative                      | -1,292 | 1,674E-17  |
| TcCLB.508081.80  | hypothetical protein                                     | -1,292 | 0,0003307  |
| TcCLB.507839.30  | dispersed gene family protein 1 (DGF-1), putative        | -1,292 | 0,002253   |
| TcCLB.506765.49  | hypothetical protein                                     | -1,292 | 0,01429    |
| TcCLB.507143.60  | hypothetical protein                                     | -1,293 | 0,002824   |
| TcCLB.506755.190 | hypothetical protein, conserved                          | -1,297 | 8,426E-34  |
| TcCLB.511451.59  | mucin-associated surface protein (MASP), putative        | -1,297 | 0,00007673 |
| TcCLB.511163.59  | hypothetical protein, conserved (fragment)               | -1,298 | 6,051E-17  |
| TcCLB.505993.10  | trans-sialidase (pseudogene), putative                   | -1,298 | 1,169E-13  |
| TcCLB.508437.20  | trans-sialidase (pseudogene), putative                   | -1,298 | 8,574E-08  |
| TcCLB.506779.180 | surface protease GP63, putative                          | -1,301 | 1,751E-29  |
| TcCLB.511797.240 | trans-sialidase (pseudogene), putative                   | -1,301 | 9,193E-10  |
| TcCLB.509947.20  | mucin-associated surface protein (MASP, pseudogene), pu  | -1,301 | 0,002242   |
| TcCLB.511213.60  | mucin-associated surface protein (MASP), putative        | -1,302 | 1,506E-17  |
| TcCLB.507487.20  | mucin-associated surface protein (MASP), putative        | -1,302 | 0,001587   |
| TcCLB.510155.270 | dispersed gene family protein 1 (DGF-1, pseudogene), put | -1,303 | 8,583E-31  |
| TcCLB.506767.196 | surface protease GP63 (pseudogene), putative             | -1,303 | 0,003077   |
| TcCLB.510359.610 | trans-sialidase, Group II, putative                      | -1,304 | 6,056E-13  |
| TcCLB.507237.120 | mucin-associated surface protein (MASP), putative        | -1,304 | 5,754E-06  |
| TcCLB.511611.20  | mucin-associated surface protein (MASP), putative        | -1,304 | 0,003101   |
| TcCLB.507237.150 | hypothetical protein                                     | -1,307 | 0,0005959  |
| TcCLB.511531.59  | mitogen activated protein kinase, putative               | -1,308 | 1,727E-24  |
| TcCLB.508747.50  | mucin TcMUCII, putative                                  | -1,308 | 4,614E-09  |

|                  |                                                         |        |            |
|------------------|---------------------------------------------------------|--------|------------|
| TcCLB.510361.180 | trans-sialidase (pseudogene), putative                  | -1,308 | 0,00001424 |
| TcCLB.511297.30  | hypothetical protein, conserved (fragment)              | -1,309 | 7,919E-35  |
| TcCLB.506573.50  | hypothetical protein, conserved                         | -1,31  | 8,596E-18  |
| TcCLB.511895.30  | receptor-type adenylate cyclase, putative               | -1,311 | 2,631E-09  |
| TcCLB.503587.80  | mucin-associated surface protein (MASP, pseudogene), pu | -1,311 | 1,052E-06  |
| TcCLB.504081.340 | hypothetical protein (pseudogene)                       | -1,311 | 0,001177   |
| TcCLB.511255.80  | mucin-associated surface protein (MASP), putative       | -1,312 | 2,961E-11  |
| TcCLB.506267.80  | mucin-associated surface protein (MASP), putative       | -1,312 | 4,512E-07  |
| TcCLB.506635.110 | kinesin-like protein, putative                          | -1,313 | 5,061E-23  |
| TcCLB.507959.170 | mucin-associated surface protein (MASP), putative       | -1,313 | 1,634E-08  |
| TcCLB.506149.29  | hypothetical protein, conserved                         | -1,313 | 6,582E-06  |
| TcCLB.506799.90  | surface protease GP63 (pseudogene), putative            | -1,315 | 2,644E-24  |
| TcCLB.508797.20  | hypothetical protein, conserved                         | -1,315 | 1,838E-16  |
| TcCLB.510359.660 | mucin TcMUCII, putative                                 | -1,315 | 4,629E-06  |
| TcCLB.506155.99  | hypothetical protein, conserved                         | -1,316 | 2,752E-18  |
| TcCLB.511921.50  | trans-sialidase, Group VI, putative                     | -1,316 | 1,009E-10  |
| TcCLB.428999.20  | receptor-type adenylate cyclase, putative               | -1,317 | 9,289E-18  |
| TcCLB.508493.50  | mucin-associated surface protein (MASP, pseudogene), pu | -1,317 | 2,559E-11  |
| TcCLB.506961.30  | hypothetical protein                                    | -1,319 | 3,789E-11  |
| TcCLB.509977.40  | hypothetical protein                                    | -1,32  | 1,293E-11  |
| TcCLB.504039.175 | hypothetical protein, conserved (pseudogene)            | -1,32  | 2,681E-07  |
| TcCLB.510025.139 | hypothetical protein, conserved (pseudogene)            | -1,32  | 0,000957   |
| TcCLB.507257.60  | Fumarate hydratase class I, cytosolic (FHc)             | -1,321 | 5,957E-23  |
| TcCLB.507949.219 | mucin-associated surface protein (MASP, pseudogene), pu | -1,321 | 1,415E-20  |
| TcCLB.511657.50  | hypothetical protein, conserved                         | -1,321 | 4,659E-10  |
| TcCLB.509263.10  | UDP-Gal or UDP-GlcNAc-dependent glycosyltransferase, p  | -1,323 | 1,373E-09  |
| TcCLB.507957.43  | hypothetical protein, conserved (pseudogene)            | -1,323 | 0,003578   |
| TcCLB.476733.20  | hypothetical protein, conserved                         | -1,324 | 6,139E-62  |
| TcCLB.511401.40  | mucin-associated surface protein (MASP, pseudogene), pu | -1,324 | 1,387E-11  |
| TcCLB.507699.37  | mucin-associated surface protein (MASP, pseudogene), pu | -1,324 | 3,725E-06  |
| TcCLB.504233.50  | hypothetical protein, conserved                         | -1,325 | 0,004899   |
| TcCLB.511407.80  | hypothetical protein, conserved                         | -1,326 | 3,054E-15  |
| TcCLB.506751.90  | trans-sialidase (pseudogene), putative                  | -1,326 | 2,333E-06  |
| TcCLB.509617.40  | hypothetical protein, conserved                         | -1,327 | 3,621E-50  |
| TcCLB.504149.60  | hypothetical protein                                    | -1,328 | 1,075E-56  |
| TcCLB.504081.50  | mucin-associated surface protein (MASP), putative       | -1,328 | 3,894E-10  |
| TcCLB.508001.50  | trans-sialidase (pseudogene), putative                  | -1,328 | 0,00004764 |
| TcCLB.506335.100 | mucin-associated surface protein (MASP), putative       | -1,329 | 4,297E-19  |
| TcCLB.508501.80  | mucin-associated surface protein (MASP), putative       | -1,329 | 1,105E-14  |
| TcCLB.510625.79  | mucin TcMUCII (pseudogene), putative                    | -1,329 | 0,0001442  |
| TcCLB.511847.40  | hypothetical protein, conserved                         | -1,33  | 4,258E-19  |
| TcCLB.507065.60  | mucin-associated surface protein (MASP), putative       | -1,332 | 1,035E-12  |
| TcCLB.507959.336 | surface protease GP63 (pseudogene), putative            | -1,332 | 1,854E-10  |
| TcCLB.508175.110 | hypothetical protein, conserved                         | -1,333 | 1,014E-43  |
| TcCLB.509767.80  | hypothetical protein, conserved                         | -1,333 | 4,743E-18  |

|                  |                                                         |        |            |
|------------------|---------------------------------------------------------|--------|------------|
| TcCLB.510401.50  | trans-sialidase (pseudogene), putative                  | -1,336 | 5,015E-23  |
| TcCLB.508015.40  | hypothetical protein                                    | -1,336 | 5,111E-14  |
| TcCLB.506767.250 | trans-sialidase (pseudogene), putative                  | -1,337 | 4,856E-08  |
| TcCLB.404455.10  | trans-sialidase, putative (fragment)                    | -1,338 | 3,424E-17  |
| TcCLB.503717.5   | mucin TcMUCII (pseudogene), putative                    | -1,338 | 0,001785   |
| TcCLB.510265.4   | hypothetical protein, conserved                         | -1,339 | 2,318E-12  |
| TcCLB.510773.30  | hypothetical protein                                    | -1,339 | 2,318E-07  |
| TcCLB.507091.160 | trans-sialidase (pseudogene), putative                  | -1,34  | 2,804E-13  |
| TcCLB.506373.39  | trans-sialidase, putative (fragment)                    | -1,341 | 1,131E-16  |
| TcCLB.510713.90  | trans-sialidase, Group V, putative                      | -1,341 | 1,758E-15  |
| TcCLB.510197.130 | trans-sialidase, Group VI, putative                     | -1,341 | 2,157E-06  |
| TcCLB.511603.60  | mucin TcMUCII, putative                                 | -1,342 | 7,654E-11  |
| TcCLB.503665.30  | mucin-associated surface protein (MASP), putative       | -1,342 | 1,221E-08  |
| TcCLB.506499.130 | hypothetical protein                                    | -1,344 | 0,0004892  |
| TcCLB.507701.10  | mucin TcMUCII, putative                                 | -1,345 | 2,724E-14  |
| TcCLB.511613.10  | mucin-associated surface protein (MASP), putative       | -1,345 | 1,116E-12  |
| TcCLB.507633.59  | mucin-associated surface protein (MASP, pseudogene), pi | -1,346 | 6,055E-06  |
| TcCLB.510483.130 | mucin TcMUCII, putative                                 | -1,346 | 0,0003127  |
| TcCLB.506501.150 | surface protease GP63 (pseudogene), putative            | -1,346 | 0,001555   |
| TcCLB.427013.10  | trans-sialidase, putative (fragment)                    | -1,347 | 6,838E-19  |
| TcCLB.511401.100 | mucin-associated surface protein (MASP), putative       | -1,347 | 1,591E-16  |
| TcCLB.506501.190 | mucin TcMUCII, putative                                 | -1,347 | 0,00001617 |
| TcCLB.509233.140 | aldehyde dehydrogenase (pseudogene), putative           | -1,348 | 4,343E-12  |
| TcCLB.510275.219 | mucin TcMUCII, putative                                 | -1,349 | 0,0001229  |
| TcCLB.506763.350 | hypothetical protein, conserved (pseudogene)            | -1,351 | 0,0009906  |
| TcCLB.508125.50  | mucin-associated surface protein (MASP, pseudogene), pi | -1,352 | 3,004E-07  |
| TcCLB.509591.20  | phosphoprotein phosphatase, putative                    | -1,352 | 0,003824   |
| TcCLB.506337.80  | surface antigen TASV, putative                          | -1,353 | 1,426E-49  |
| TcCLB.506813.220 | trans-sialidase, Group V, putative                      | -1,353 | 9,947E-09  |
| TcCLB.503545.10  | trans-sialidase (pseudogene), putative                  | -1,354 | 1,61E-11   |
| TcCLB.506661.170 | hypothetical protein, conserved                         | -1,355 | 4,494E-28  |
| TcCLB.510693.176 | mucin TcMUC (pseudogene), putative                      | -1,356 | 7,631E-10  |
| TcCLB.508389.114 | mucin TcMUCII, putative                                 | -1,356 | 0,00008669 |
| TcCLB.507069.20  | hypothetical protein                                    | -1,357 | 0,02968    |
| TcCLB.506519.60  | Protein kinase domain, putative                         | -1,359 | 3,296E-46  |
| TcCLB.506229.10  | Mitogen-activated protein kinase 10, putative (MPK10)   | -1,359 | 6,914E-25  |
| TcCLB.507959.323 | syntaxin binding protein (pseudogene), putative         | -1,359 | 3,111E-09  |
| TcCLB.506763.370 | hypothetical protein                                    | -1,359 | 0,001228   |
| TcCLB.508877.10  | trans-sialidase (pseudogene), putative                  | -1,36  | 3,795E-10  |
| TcCLB.509439.20  | UDP-Gal or UDP-GlcNAc-dependent glycosyltransferase, p  | -1,36  | 1,497E-07  |
| TcCLB.510483.190 | mucin TcMUCII, putative                                 | -1,361 | 1,177E-13  |
| TcCLB.509081.60  | syntaxin binding protein (pseudogene), putative         | -1,361 | 3,048E-12  |
| TcCLB.508441.94  | mucin TcMUCII, putative                                 | -1,363 | 1,087E-20  |
| TcCLB.511173.120 | mucin-associated surface protein (MASP, pseudogene), pi | -1,364 | 4,093E-13  |
| TcCLB.504219.70  | mucin TcMUC, putative (fragment)                        | -1,365 | 4,149E-10  |

|                  |                                                             |        |            |
|------------------|-------------------------------------------------------------|--------|------------|
| TcCLB.511077.95  | mucin TcMUCII (pseudogene), putative                        | -1,365 | 0,005882   |
| TcCLB.510545.30  | mucin-associated surface protein (MASP, pseudogene), pu     | -1,366 | 1,436E-06  |
| TcCLB.506309.34  | mucin TcMUCII, putative                                     | -1,366 | 0,01396    |
| TcCLB.511283.120 | hypothetical protein, conserved                             | -1,369 | 0,0002015  |
| TcCLB.508807.5   | glycosylphosphatidylinositol-specific phospholipase C, puti | -1,37  | 2,744E-20  |
| TcCLB.511311.7   | trans-sialidase, putative (fragment)                        | -1,37  | 1,243E-19  |
| TcCLB.503913.40  | hypothetical protein                                        | -1,371 | 3,81E-16   |
| TcCLB.503741.10  | mucin TcMUCII, putative                                     | -1,372 | 1,445E-09  |
| TcCLB.445557.10  | mucin TcMUCII, putative                                     | -1,372 | 0,001093   |
| TcCLB.506337.100 | surface antigen TASV, putative                              | -1,373 | 2,274E-41  |
| TcCLB.510583.220 | mucin TcMUCII, putative                                     | -1,373 | 0,001748   |
| TcCLB.511917.10  | trans-sialidase, putative                                   | -1,374 | 3,62E-14   |
| TcCLB.509525.280 | hypothetical protein                                        | -1,375 | 0,0002764  |
| TcCLB.509907.50  | hypothetical protein, conserved (pseudogene)                | -1,375 | 0,000571   |
| TcCLB.511183.600 | mucin-associated surface protein (MASP, pseudogene), pu     | -1,379 | 4,126E-15  |
| TcCLB.510805.30  | mucin-associated surface protein (MASP, pseudogene), pu     | -1,379 | 3,747E-13  |
| TcCLB.508163.234 | trans-sialidase, putative                                   | -1,379 | 1,303E-10  |
| TcCLB.503973.290 | mucin TcMUCII, putative                                     | -1,379 | 6,938E-06  |
| TcCLB.507987.20  | hypothetical protein                                        | -1,379 | 0,0006962  |
| TcCLB.503649.20  | mucin TcMUC, putative                                       | -1,379 | 0,00118    |
| TcCLB.511861.80  | UDP-Gal or UDP-GlcNAc-dependent glycosyltransferase, p      | -1,38  | 6,281E-34  |
| TcCLB.510363.70  | mucin-associated surface protein (MASP), putative           | -1,381 | 0,0001043  |
| TcCLB.510025.100 | mucin-associated surface protein (MASP), putative           | -1,382 | 1,417E-19  |
| TcCLB.511923.60  | trans-sialidase, Group V, putative                          | -1,382 | 6,976E-16  |
| TcCLB.506971.30  | trans-sialidase (pseudogene), putative                      | -1,382 | 5,311E-10  |
| TcCLB.507957.310 | hypothetical protein                                        | -1,382 | 3,205E-07  |
| TcCLB.509775.20  | protein kinase, putative                                    | -1,383 | 7,21E-51   |
| TcCLB.506279.10  | trans-sialidase, Group VI, putative                         | -1,383 | 4,686E-15  |
| TcCLB.510279.190 | mucin-associated surface protein (MASP), putative           | -1,383 | 6,509E-10  |
| TcCLB.508119.20  | mucin-associated surface protein (MASP), putative           | -1,385 | 2,068E-16  |
| TcCLB.506875.10  | mucin TcMUCII (pseudogene), putative                        | -1,385 | 0,00004278 |
| TcCLB.505201.50  | trans-sialidase (pseudogene), putative                      | -1,386 | 2,628E-24  |
| TcCLB.508233.50  | variant-surface-glycoprotein phospholipase C, putative      | -1,387 | 6,623E-30  |
| TcCLB.506339.10  | trans-sialidase, Group V, putative                          | -1,388 | 5,157E-16  |
| TcCLB.508313.40  | mucin TcMUCII, putative                                     | -1,388 | 6,524E-09  |
| TcCLB.503587.30  | trans-sialidase, Group V, putative                          | -1,388 | 5,329E-07  |
| TcCLB.511185.114 | mucin TcMUCII (pseudogene), putative                        | -1,388 | 0,001483   |
| TcCLB.506409.190 | mucin-associated surface protein (MASP, pseudogene), pu     | -1,389 | 1,337E-12  |
| TcCLB.507731.10  | mucin-associated surface protein (MASP), putative           | -1,389 | 2,513E-11  |
| TcCLB.510497.90  | mucin TcMUCII, putative                                     | -1,391 | 4,947E-07  |
| TcCLB.508069.5   | trans-sialidase, putative (fragment)                        | -1,391 | 5,692E-07  |
| TcCLB.466593.19  | hypothetical protein, conserved                             | -1,392 | 4,316E-38  |
| TcCLB.506599.170 | mucin-associated surface protein (MASP), putative           | -1,392 | 2,594E-12  |
| TcCLB.509631.20  | mucin-associated surface protein (MASP), putative           | -1,392 | 1,973E-11  |
| TcCLB.510025.205 | hypothetical protein, conserved (pseudogene)                | -1,393 | 2,484E-06  |

|                  |                                                               |        |            |
|------------------|---------------------------------------------------------------|--------|------------|
| TcCLB.506757.90  | trans-sialidase, Group II, putative                           | -1,394 | 3,16E-15   |
| TcCLB.509897.200 | trans-sialidase, Group V, putative                            | -1,395 | 3,402E-20  |
| TcCLB.508167.20  | mucin TcMUCII, putative                                       | -1,395 | 6,182E-11  |
| TcCLB.507731.50  | trans-sialidase (pseudogene), putative                        | -1,395 | 7,678E-06  |
| TcCLB.510279.340 | mucin TcMUCII, putative                                       | -1,395 | 0,0001453  |
| TcCLB.509991.9   | protein kinase, putative                                      | -1,397 | 2,782E-20  |
| TcCLB.511923.100 | trans-sialidase (pseudogene), putative                        | -1,397 | 8,474E-20  |
| TcCLB.506457.30  | hypoxanthine-guanine phosphoribosyltransferase, putative      | -1,397 | 1,494E-18  |
| TcCLB.507085.70  | mucin-associated surface protein (MASP, pseudogene), putative | -1,397 | 2,461E-12  |
| TcCLB.507953.185 | hypothetical protein, conserved (pseudogene)                  | -1,397 | 4,371E-07  |
| TcCLB.511183.450 | trans-sialidase (pseudogene), putative                        | -1,398 | 4,113E-17  |
| TcCLB.511295.20  | hypothetical protein, conserved                               | -1,4   | 2,483E-18  |
| TcCLB.511575.120 | hypothetical protein, conserved                               | -1,401 | 8,464E-50  |
| TcCLB.507821.10  | trans-sialidase, Group VI, putative                           | -1,401 | 2,986E-21  |
| TcCLB.506909.100 | trans-sialidase, Group V, putative                            | -1,401 | 2,5E-10    |
| TcCLB.402919.10  | trans-sialidase, putative                                     | -1,402 | 6,926E-19  |
| TcCLB.504259.10  | hypothetical protein, conserved                               | -1,402 | 1,161E-13  |
| TcCLB.508521.40  | hypothetical protein                                          | -1,402 | 9,573E-06  |
| TcCLB.506501.341 | surface protease GP63 (pseudogene), putative                  | -1,402 | 0,0001252  |
| TcCLB.509971.44  | mucin-associated surface protein (MASP, pseudogene), putative | -1,403 | 0,00005766 |
| TcCLB.510483.310 | mucin-associated surface protein (MASP), putative             | -1,404 | 3,664E-08  |
| TcCLB.506173.50  | mucin TcMUCII (pseudogene), putative                          | -1,404 | 2,016E-07  |
| TcCLB.508761.40  | trans-sialidase, Group V, putative                            | -1,405 | 4,682E-10  |
| TcCLB.509547.40  | mucin-associated surface protein (MASP), putative             | -1,406 | 6,647E-08  |
| TcCLB.509155.39  | surface protease GP63, putative                               | -1,406 | 0,001816   |
| TcCLB.508461.310 | protein kinase A catalytic subunit isoform 1, putative        | -1,407 | 4,39E-35   |
| TcCLB.510439.40  | hypothetical protein                                          | -1,407 | 1,057E-24  |
| TcCLB.509387.5   | trans-sialidase, putative                                     | -1,408 | 1,034E-14  |
| TcCLB.507071.70  | mucin-associated surface protein (MASP, pseudogene), putative | -1,408 | 8,678E-10  |
| TcCLB.508633.30  | mucin-associated surface protein (MASP, pseudogene), putative | -1,408 | 1,472E-07  |
| TcCLB.508139.160 | expression site-associated gene (ESAG-like) protein, putative | -1,409 | 2,326E-18  |
| TcCLB.511089.70  | mucin-associated surface protein (MASP, pseudogene), putative | -1,409 | 1,593E-11  |
| TcCLB.506281.100 | mucin-associated surface protein (MASP, pseudogene), putative | -1,409 | 2,215E-10  |
| TcCLB.509753.150 | mucin TcMUCII, putative                                       | -1,41  | 0,0001191  |
| TcCLB.509613.20  | trans-sialidase (pseudogene), putative                        | -1,411 | 2,794E-11  |
| TcCLB.506499.200 | hypothetical protein                                          | -1,411 | 4,124E-06  |
| TcCLB.508441.110 | mucin TcMUCI, putative                                        | -1,412 | 1,581E-27  |
| TcCLB.511219.40  | trans-sialidase, Group II, putative                           | -1,412 | 1,86E-18   |
| TcCLB.510583.34  | mucin-associated surface protein (MASP, pseudogene), putative | -1,413 | 1,269E-08  |
| TcCLB.506281.117 | mucin TcMUCII (pseudogene), putative                          | -1,413 | 8,273E-08  |
| TcCLB.504425.10  | trans-sialidase, Group III, putative                          | -1,414 | 4,267E-30  |
| TcCLB.506815.20  | mucin-associated surface protein (MASP, pseudogene), putative | -1,414 | 1,676E-28  |
| TcCLB.509553.50  | DNA repair and recombination helicase protein PIF5, putative  | -1,415 | 5,103E-31  |
| TcCLB.509869.30  | mucin TcMUCII, putative                                       | -1,415 | 0,0002895  |
| TcCLB.507957.260 | surface protease GP63 (pseudogene), putative                  | -1,417 | 0,00002368 |

|                  |                                                           |        |            |
|------------------|-----------------------------------------------------------|--------|------------|
| TcCLB.510299.70  | hypothetical protein, conserved                           | -1,418 | 3,967E-33  |
| TcCLB.508767.20  | surface protein TolT (TolT)                               | -1,418 | 1,649E-29  |
| TcCLB.507205.10  | mucin-associated surface protein (MASP, pseudogene), pu   | -1,419 | 1,058E-07  |
| TcCLB.511165.100 | serine/threonine protein kinase, putative                 | -1,42  | 9,736E-34  |
| TcCLB.508029.50  | kinesin-like protein, putative                            | -1,42  | 3,943E-29  |
| TcCLB.506221.70  | Paraflagellar Rod Proteome Component 9, putative (PFC9)   | -1,421 | 1,169E-16  |
| TcCLB.508983.10  | mucin-associated surface protein (MASP, pseudogene), pu   | -1,422 | 1,389E-10  |
| TcCLB.510021.90  | hypothetical protein, conserved (pseudogene)              | -1,423 | 0,00001064 |
| TcCLB.506269.45  | trans-sialidase (pseudogene), putative                    | -1,423 | 0,0004328  |
| TcCLB.503633.21  | mucin TcMUCII (pseudogene), putative                      | -1,423 | 0,00103    |
| TcCLB.510525.139 | protein kinase, putative                                  | -1,424 | 1,481E-27  |
| TcCLB.510533.170 | hypothetical protein, conserved                           | -1,425 | 1,973E-32  |
| TcCLB.508163.210 | trans-sialidase (pseudogene), putative                    | -1,425 | 3,171E-13  |
| TcCLB.506759.150 | hypothetical protein, conserved (pseudogene)              | -1,425 | 1,336E-06  |
| TcCLB.511767.130 | expression site-associated gene (ESAG-like) protein, puta | -1,426 | 1,006E-11  |
| TcCLB.506767.123 | syntaxin binding protein (pseudogene), putative           | -1,427 | 0,00003791 |
| TcCLB.510017.15  | surface protease GP63 (pseudogene), putative              | -1,428 | 0,00001778 |
| TcCLB.511079.100 | mucin-associated surface protein (MASP), putative (fragm  | -1,429 | 0,0299     |
| TcCLB.507941.120 | hypothetical protein, conserved                           | -1,43  | 4,873E-32  |
| TcCLB.511127.90  | hypothetical protein, conserved                           | -1,43  | 6,553E-24  |
| TcCLB.510377.10  | trans-sialidase, Group V, putative                        | -1,434 | 5,017E-08  |
| TcCLB.510371.61  | surface protease GP63 (pseudogene), putative              | -1,434 | 3,852E-07  |
| TcCLB.509419.94  | mucin TcMUCII (pseudogene), putative                      | -1,434 | 0,0007133  |
| TcCLB.510311.100 | hypothetical protein, conserved                           | -1,437 | 5,135E-20  |
| TcCLB.506147.20  | hypothetical protein                                      | -1,437 | 3,773E-16  |
| TcCLB.509553.30  | ribonuclease mar1, putative                               | -1,437 | 3,24E-15   |
| TcCLB.507069.130 | mucin-associated surface protein (MASP, pseudogene), pu   | -1,437 | 8,985E-09  |
| TcCLB.510025.191 | surface protease GP63 (pseudogene), putative              | -1,437 | 0,00003032 |
| TcCLB.507917.10  | surface protease GP63, putative                           | -1,438 | 1,909E-25  |
| TcCLB.503745.30  | ascorbate peroxidase (APX)                                | -1,438 | 3,02E-23   |
| TcCLB.511439.10  | expression site-associated gene (ESAG-like) protein, puta | -1,438 | 0,0001234  |
| TcCLB.509899.100 | trans-sialidase, Group V, putative                        | -1,439 | 7,717E-18  |
| TcCLB.511603.250 | mucin-associated surface protein (MASP), putative         | -1,44  | 1,665E-10  |
| TcCLB.511245.10  | hypothetical protein, conserved                           | -1,441 | 8,469E-41  |
| TcCLB.508389.100 | mucin-associated surface protein (MASP), putative         | -1,441 | 6,345E-19  |
| TcCLB.463901.10  | trans-sialidase, putative (fragment)                      | -1,441 | 7,852E-12  |
| TcCLB.506137.10  | surface protease GP63, putative                           | -1,441 | 3,475E-10  |
| TcCLB.506595.40  | trans-sialidase, Group II, putative                       | -1,442 | 9,46E-36   |
| TcCLB.510025.7   | syntaxin binding protein (pseudogene), putative           | -1,442 | 2,213E-06  |
| TcCLB.511259.18  | mucin-associated surface protein (MASP, pseudogene), pu   | -1,444 | 1,225E-10  |
| TcCLB.510261.10  | mucin-associated surface protein (MASP), putative         | -1,446 | 1,536E-11  |
| TcCLB.511259.200 | mucin-associated surface protein (MASP, pseudogene), pu   | -1,446 | 3,146E-08  |
| TcCLB.504655.9   | mucin-associated surface protein (MASP), putative         | -1,448 | 3,568E-63  |
| TcCLB.506287.30  | hypothetical protein, conserved                           | -1,448 | 2,835E-29  |
| TcCLB.510377.405 | hypothetical protein, conserved (pseudogene)              | -1,448 | 0,0001585  |

|                  |                                                            |        |            |
|------------------|------------------------------------------------------------|--------|------------|
| TcCLB.508767.10  | surface protein TolT                                       | -1,449 | 4,35E-35   |
| TcCLB.508227.30  | mucin TcMUCII, putative                                    | -1,449 | 1,517E-07  |
| TcCLB.509897.270 | trans-sialidase, Group V, putative                         | -1,451 | 3,855E-17  |
| TcCLB.508153.680 | RNA-binding protein 6, putative                            | -1,451 | 1,204E-12  |
| TcCLB.508873.450 | mucin-associated surface protein (MASP), putative          | -1,451 | 1,876E-07  |
| TcCLB.509429.41  | trans-sialidase (pseudogene), putative                     | -1,453 | 2,175E-16  |
| TcCLB.506501.100 | hypothetical protein                                       | -1,455 | 0,006337   |
| TcCLB.511349.100 | trans-sialidase, Group II, putative                        | -1,456 | 7,635E-20  |
| TcCLB.507863.6   | hypothetical protein, conserved (pseudogene)               | -1,457 | 0,001334   |
| TcCLB.510433.20  | surface protein TolT, putative                             | -1,458 | 2,548E-50  |
| TcCLB.509525.70  | hypothetical protein                                       | -1,458 | 1,188E-08  |
| TcCLB.503507.20  | mucin TcMUCII, putative (fragment)                         | -1,458 | 0,0000297  |
| TcCLB.508165.140 | mucin TcMUCII (pseudogene), putative                       | -1,459 | 0,0000427  |
| TcCLB.506459.180 | trans-sialidase, Group V, putative                         | -1,46  | 3,48E-14   |
| TcCLB.510553.50  | UDP-Gal or UDP-GlcNAc-dependent glycosyltransferase, $\mu$ | -1,46  | 1,949E-11  |
| TcCLB.508165.60  | mucin TcMUCII, putative                                    | -1,461 | 0,0007409  |
| TcCLB.504081.440 | 90 kDa surface protein, putative                           | -1,463 | 5,317E-14  |
| TcCLB.510025.126 | syntaxin binding protein (pseudogene), putative            | -1,464 | 2,542E-08  |
| TcCLB.506599.250 | surface protease GP63 (pseudogene), putative               | -1,464 | 0,0002306  |
| TcCLB.510361.100 | mucin TcMUCII, putative                                    | -1,466 | 1,396E-07  |
| TcCLB.506939.120 | trans-sialidase, Group V, putative                         | -1,467 | 2,858E-15  |
| TcCLB.503507.50  | mucin TcMUCII, putative                                    | -1,467 | 9,739E-07  |
| TcCLB.510025.14  | hypothetical protein, conserved (pseudogene)               | -1,468 | 0,002284   |
| TcCLB.511607.90  | mucin-associated surface protein (MASP, pseudogene), $\mu$ | -1,469 | 6,245E-16  |
| TcCLB.511149.10  | mucin TcMUCII, putative                                    | -1,469 | 0,00006094 |
| TcCLB.506755.90  | hypothetical protein, conserved                            | -1,47  | 8,754E-33  |
| TcCLB.509607.50  | protein kinase, putative                                   | -1,47  | 4,564E-11  |
| TcCLB.506985.50  | hypothetical protein, conserved                            | -1,471 | 3,678E-32  |
| TcCLB.510329.270 | Fumarate hydratase class I, cytosolic (FHc)                | -1,471 | 1,244E-17  |
| TcCLB.508365.114 | mucin-associated surface protein (MASP, pseudogene), $\mu$ | -1,472 | 2,477E-15  |
| TcCLB.508697.10  | trans-sialidase, Group V, putative                         | -1,472 | 8,753E-10  |
| TcCLB.507231.30  | mucin-associated surface protein (MASP), putative          | -1,473 | 1,451E-08  |
| TcCLB.504081.80  | trans-sialidase, Group V, putative                         | -1,473 | 1,115E-07  |
| TcCLB.508521.50  | surface protease GP63 (pseudogene), putative               | -1,474 | 2,653E-18  |
| TcCLB.508297.20  | UDP-Gal or UDP-GlcNAc-dependent glycosyltransferase, $\mu$ | -1,474 | 3,777E-15  |
| TcCLB.430603.10  | mucin-associated surface protein (MASP, pseudogene), $\mu$ | -1,474 | 6,094E-10  |
| TcCLB.507159.70  | hypothetical protein, conserved                            | -1,475 | 4,888E-53  |
| TcCLB.507641.130 | hypothetical protein, conserved                            | -1,476 | 8,979E-36  |
| TcCLB.508147.90  | mucin-associated surface protein (MASP, pseudogene), $\mu$ | -1,476 | 1,671E-12  |
| TcCLB.507637.130 | mucin TcMUCII, putative                                    | -1,477 | 4,387E-07  |
| TcCLB.509897.140 | trans-sialidase, Group V, putative                         | -1,478 | 2,573E-21  |
| TcCLB.509753.270 | trans-sialidase (pseudogene), putative                     | -1,479 | 2,201E-17  |
| TcCLB.503609.10  | trans-sialidase (pseudogene), putative                     | -1,479 | 0,0002575  |
| TcCLB.511255.660 | mucin TcMUCII, putative                                    | -1,48  | 9,991E-07  |
| TcCLB.508547.9   | UDP-Gal or UDP-GlcNAc-dependent glycosyltransferase, $\mu$ | -1,482 | 6,437E-34  |

|                  |                                                        |        |            |
|------------------|--------------------------------------------------------|--------|------------|
| TcCLB.510261.31  | mucin-associated surface protein (MASP, pseudogene), p | -1,483 | 3,121E-10  |
| TcCLB.509195.30  | mucin-associated surface protein (MASP), putative      | -1,483 | 9,012E-06  |
| TcCLB.509265.90  | trans-sialidase, Group II, putative                    | -1,485 | 1,064E-31  |
| TcCLB.511643.130 | mucin-associated surface protein (MASP, pseudogene), p | -1,486 | 3,313E-23  |
| TcCLB.511183.590 | mucin TcMUCII, putative                                | -1,487 | 4,766E-14  |
| TcCLB.509753.310 | mucin-associated surface protein (MASP), putative      | -1,487 | 2,617E-09  |
| TcCLB.506859.230 | hypothetical protein, conserved                        | -1,487 | 0,001615   |
| TcCLB.510111.20  | trans-sialidase, Group II, putative                    | -1,488 | 8,905E-18  |
| TcCLB.509753.250 | mucin-associated surface protein (MASP), putative      | -1,489 | 6,69E-13   |
| TcCLB.504157.130 | surface protein TolT, putative (TolT)                  | -1,49  | 2,444E-26  |
| TcCLB.506279.250 | trans-sialidase (pseudogene), putative                 | -1,49  | 1,404E-10  |
| TcCLB.509221.50  | trans-sialidase (pseudogene), putative                 | -1,492 | 1,224E-26  |
| TcCLB.506329.65  | trans-sialidase (pseudogene), putative                 | -1,492 | 0,00004907 |
| TcCLB.507159.50  | hypothetical protein, conserved                        | -1,493 | 1,671E-53  |
| TcCLB.508511.10  | mucin-associated surface protein (MASP, pseudogene), p | -1,493 | 3,165E-06  |
| TcCLB.508433.170 | mucin TcMUCII, putative                                | -1,493 | 0,0005129  |
| TcCLB.509685.40  | trans-sialidase, Group V, putative                     | -1,494 | 6,871E-27  |
| TcCLB.506993.180 | mucin-associated surface protein (MASP), putative      | -1,494 | 2,691E-11  |
| TcCLB.508523.30  | trans-sialidase, Group II, putative                    | -1,494 | 1,24E-08   |
| TcCLB.508013.10  | mucin-associated surface protein (MASP, pseudogene), p | -1,494 | 0,00002008 |
| TcCLB.506993.63  | mucin TcMUCI, putative                                 | -1,494 | 0,00009796 |
| TcCLB.504101.10  | hypothetical protein                                   | -1,495 | 4,132E-23  |
| TcCLB.511391.60  | trans-sialidase (pseudogene), putative                 | -1,495 | 1,324E-11  |
| TcCLB.511129.80  | UDP-Gal or UDP-GlcNAc-dependent glycosyltransferase, p | -1,496 | 2,842E-17  |
| TcCLB.509489.10  | hypothetical protein, conserved                        | -1,498 | 5,935E-65  |
| TcCLB.508805.136 | UDP-Gal or UDP-GlcNAc-dependent glycosyltransferase, p | -1,498 | 1,761E-17  |
| TcCLB.510279.314 | mucin TcMUCII (pseudogene), putative                   | -1,498 | 5,043E-06  |
| TcCLB.508243.23  | mucin TcMUCII, putative                                | -1,499 | 1,836E-08  |
| TcCLB.511173.430 | mucin-associated surface protein (MASP), putative      | -1,5   | 7,167E-14  |
| TcCLB.511595.39  | mucin TcMUCII, putative                                | -1,5   | 1,036E-08  |
| TcCLB.507859.60  | mucin-associated surface protein (MASP), putative      | -1,501 | 0,00369    |
| TcCLB.510623.50  | mucin-associated surface protein (MASP, pseudogene), p | -1,502 | 2,075E-13  |
| TcCLB.511325.10  | amino acid permease (pseudogene), putative             | -1,502 | 4,439E-09  |
| TcCLB.510715.100 | mucin-associated surface protein (MASP, pseudogene), p | -1,504 | 4,519E-09  |
| TcCLB.504239.270 | hypothetical protein                                   | -1,505 | 0,00006976 |
| TcCLB.511643.110 | trans-sialidase, Group V, putative                     | -1,506 | 6,605E-19  |
| TcCLB.506281.70  | mucin TcMUCI, putative                                 | -1,506 | 1,642E-08  |
| TcCLB.503991.10  | hypothetical protein, conserved                        | -1,507 | 3,577E-23  |
| TcCLB.508099.9   | mucin-associated surface protein (MASP, pseudogene), p | -1,507 | 9,433E-11  |
| TcCLB.508261.29  | mucin TcMUCII (pseudogene), putative                   | -1,508 | 0,0002326  |
| TcCLB.511183.40  | mucin-associated surface protein (MASP, pseudogene), p | -1,509 | 1,562E-07  |
| TcCLB.506375.100 | hypothetical protein                                   | -1,51  | 7,832E-38  |
| TcCLB.508157.20  | mucin-associated surface protein (MASP), putative      | -1,51  | 1,897E-13  |
| TcCLB.505949.139 | mucin-associated surface protein (MASP, pseudogene), p | -1,51  | 4,634E-07  |
| TcCLB.507957.304 | surface protease GP63 (pseudogene), putative           | -1,51  | 0,00006932 |



|                  |                                                         |        |            |
|------------------|---------------------------------------------------------|--------|------------|
| TcCLB.508977.50  | mucin-associated surface protein (MASP), putative       | -1,511 | 1,955E-18  |
| TcCLB.510625.150 | mucin-associated surface protein (MASP), putative       | -1,511 | 0,001252   |
| TcCLB.509663.20  | hypothetical protein, conserved                         | -1,514 | 4,968E-23  |
| TcCLB.511021.30  | hypothetical protein, conserved                         | -1,517 | 3,444E-49  |
| TcCLB.510085.60  | mucin-associated surface protein (MASP), putative       | -1,517 | 4,706E-15  |
| TcCLB.510483.240 | mucin-associated surface protein (MASP, pseudogene), pi | -1,517 | 1,034E-14  |
| TcCLB.506657.88  | hypothetical protein, conserved                         | -1,517 | 0,00001378 |
| TcCLB.508227.40  | mucin-associated surface protein (MASP), putative       | -1,518 | 1,811E-27  |
| TcCLB.509897.20  | trans-sialidase, Group V, putative                      | -1,519 | 1,991E-14  |
| TcCLB.506409.255 | surface protease GP63, putative                         | -1,519 | 0,002926   |
| TcCLB.508541.20  | mucin-associated surface protein (MASP), putative       | -1,52  | 5,609E-13  |
| TcCLB.508221.560 | mucin TcMUCII, putative                                 | -1,52  | 0,0002766  |
| TcCLB.510021.109 | mucin-associated surface protein (MASP, pseudogene), pi | -1,521 | 2,668E-14  |
| TcCLB.508759.30  | mucin TcMUC (pseudogene), putative                      | -1,522 | 0,00003365 |
| TcCLB.508857.15  | trans-sialidase, putative (fragment)                    | -1,523 | 1,681E-21  |
| TcCLB.507357.60  | mucin TcMUCII, putative                                 | -1,523 | 6,172E-07  |
| TcCLB.506559.450 | hypothetical protein                                    | -1,524 | 1,031E-31  |
| TcCLB.508999.134 | mucin TcMUCII, putative                                 | -1,525 | 1,32E-07   |
| TcCLB.506667.80  | mucin-associated surface protein (MASP), putative       | -1,525 | 0,00000359 |
| TcCLB.506499.30  | trans-sialidase (pseudogene), putative                  | -1,527 | 1,627E-09  |
| TcCLB.508805.120 | UDP-Gal or UDP-GlcNAc-dependent glycosyltransferase, p  | -1,528 | 6,285E-18  |
| TcCLB.506459.130 | mucin-associated surface protein (MASP), putative       | -1,528 | 1,359E-07  |
| TcCLB.507959.180 | surface protease GP63 (pseudogene), putative            | -1,528 | 7,404E-06  |
| TcCLB.506415.10  | dispersed gene family protein 1 (DGF-1), putative       | -1,53  | 6,421E-71  |
| TcCLB.511047.20  | mucin-like glycoprotein, putative                       | -1,53  | 2,745E-68  |
| TcCLB.506939.10  | mucin-associated surface protein (MASP, pseudogene), pi | -1,53  | 0,00003477 |
| TcCLB.507993.20  | hypothetical protein, conserved                         | -1,531 | 1,807E-13  |
| TcCLB.507085.80  | trans-sialidase (pseudogene), putative                  | -1,532 | 5,414E-39  |
| TcCLB.503777.4   | hypothetical protein, conserved                         | -1,532 | 3,42E-14   |
| TcCLB.511099.230 | mucin TcMUCII, putative                                 | -1,532 | 0,00001577 |
| TcCLB.503859.45  | mucin TcMUCII, putative                                 | -1,532 | 0,00001761 |
| TcCLB.504239.380 | hypothetical protein                                    | -1,532 | 0,000025   |
| TcCLB.511607.100 | mucin TcMUCII, putative                                 | -1,533 | 9,712E-14  |
| TcCLB.510489.50  | trans-sialidase, putative                               | -1,533 | 3,081E-06  |
| TcCLB.511089.74  | mucin TcMUCII (pseudogene), putative                    | -1,533 | 0,00001221 |
| TcCLB.509419.49  | mucin-associated surface protein (MASP, pseudogene), pi | -1,534 | 0,0003345  |
| TcCLB.510615.4   | hypothetical protein, conserved                         | -1,536 | 1,347E-24  |
| TcCLB.507633.51  | trans-sialidase (pseudogene), putative                  | -1,536 | 0,00001649 |
| TcCLB.506279.19  | mucin-associated surface protein (MASP, pseudogene), pi | -1,537 | 3,269E-20  |
| TcCLB.511603.300 | mucin-associated surface protein (MASP), putative       | -1,539 | 1,442E-17  |
| TcCLB.510101.270 | hypothetical protein, conserved                         | -1,54  | 1,017E-61  |
| TcCLB.510279.210 | mucin-associated surface protein (MASP), putative       | -1,541 | 1,056E-07  |
| TcCLB.509525.340 | hypothetical protein                                    | -1,541 | 7,844E-06  |
| TcCLB.511089.10  | mucin-associated surface protein (MASP), putative       | -1,541 | 0,0000669  |
| TcCLB.506757.129 | mucin-associated surface protein (MASP, pseudogene), pi | -1,542 | 1,309E-26  |

|                  |                                                               |        |            |
|------------------|---------------------------------------------------------------|--------|------------|
| TcCLB.511607.40  | mucin-associated surface protein (MASP), putative             | -1,542 | 1,926E-18  |
| TcCLB.510483.300 | mucin TcMUCII, putative                                       | -1,542 | 2,243E-18  |
| TcCLB.507673.60  | hypothetical protein, conserved                               | -1,542 | 5,143E-15  |
| TcCLB.507255.63  | UDP-Gal or UDP-GlcNAc-dependent glycosyltransferase, $\beta$  | -1,542 | 2,767E-12  |
| TcCLB.503755.60  | surface protease GP63 (pseudogene), putative                  | -1,542 | 2,195E-08  |
| TcCLB.506595.10  | dispersed gene family protein 1 (DGF-1), putative             | -1,543 | 5,013E-14  |
| TcCLB.481211.10  | mucin TcMUCII, putative                                       | -1,544 | 7,054E-20  |
| TcCLB.511603.390 | mucin TcMUCII, putative                                       | -1,544 | 0,0007544  |
| TcCLB.503773.9   | hypothetical protein, conserved (fragment)                    | -1,545 | 1,057E-19  |
| TcCLB.503767.10  | trans-sialidase, Group II, putative                           | -1,545 | 0,0002143  |
| TcCLB.509157.70  | hypothetical protein, conserved                               | -1,546 | 3,513E-17  |
| TcCLB.506615.10  | trans-sialidase (pseudogene), putative                        | -1,547 | 3,68E-42   |
| TcCLB.511859.130 | mucin-like glycoprotein, putative                             | -1,547 | 2,129E-36  |
| TcCLB.510275.340 | mucin-associated surface protein (MASP, pseudogene), putative | -1,547 | 2,405E-21  |
| TcCLB.511437.20  | expression site-associated gene (ESAG-like) protein, putative | -1,548 | 2,782E-10  |
| TcCLB.510489.36  | mucin-associated surface protein (MASP, pseudogene), putative | -1,55  | 9,271E-12  |
| TcCLB.447135.10  | surface protease GP63, putative                               | -1,55  | 0,00003063 |
| TcCLB.508873.460 | mucin-associated surface protein (MASP), putative             | -1,552 | 1,222E-26  |
| TcCLB.511533.5   | mitogen activated protein kinase (pseudogene), putative       | -1,553 | 2,549E-07  |
| TcCLB.510717.10  | surface antigen TASV, putative                                | -1,554 | 3,449E-56  |
| TcCLB.504081.490 | mucin-associated surface protein (MASP), putative             | -1,554 | 7,913E-10  |
| TcCLB.507643.60  | trans-sialidase (pseudogene), putative                        | -1,555 | 7,825E-35  |
| TcCLB.511861.100 | mucin-associated surface protein (MASP, pseudogene), putative | -1,555 | 1,531E-23  |
| TcCLB.508065.10  | UDP-Gal or UDP-GlcNAc-dependent glycosyltransferase, $\beta$  | -1,555 | 1,169E-17  |
| TcCLB.505025.110 | surface protease GP63 (pseudogene), putative                  | -1,557 | 4,751E-10  |
| TcCLB.506667.70  | mucin TcMUCII, putative                                       | -1,557 | 3,203E-08  |
| TcCLB.509419.190 | mucin-associated surface protein (MASP, pseudogene), putative | -1,557 | 0,00007513 |
| TcCLB.506667.120 | mucin-associated surface protein (MASP), putative             | -1,558 | 1,356E-11  |
| TcCLB.511625.149 | mucin TcMUCII (pseudogene), putative                          | -1,559 | 1,169E-08  |
| TcCLB.507953.190 | hypothetical protein                                          | -1,559 | 0,00000285 |
| TcCLB.504277.20  | hypothetical protein                                          | -1,56  | 1,664E-49  |
| TcCLB.508777.40  | leucine-rich repeat protein, putative                         | -1,56  | 3,934E-44  |
| TcCLB.511509.10  | hypothetical protein, conserved                               | -1,56  | 1,101E-27  |
| TcCLB.498829.10  | mucin TcMUC, putative                                         | -1,56  | 4,737E-20  |
| TcCLB.507069.139 | mucin TcMUCII (pseudogene), putative                          | -1,56  | 6,233E-07  |
| TcCLB.508495.70  | mucin TcMUCII, putative                                       | -1,561 | 4,755E-28  |
| TcCLB.506799.150 | surface protease GP63 (pseudogene), putative                  | -1,561 | 3,671E-16  |
| TcCLB.506379.10  | UDP-Gal or UDP-GlcNAc-dependent glycosyltransferase, $\beta$  | -1,563 | 1,256E-16  |
| TcCLB.506751.100 | mucin-associated surface protein (MASP), putative             | -1,563 | 1,495E-10  |
| TcCLB.510547.14  | mucin-associated surface protein (MASP, pseudogene), putative | -1,563 | 7,002E-09  |
| TcCLB.431357.20  | UDP-Gal or UDP-GlcNAc-dependent glycosyltransferase, $\beta$  | -1,563 | 2,031E-06  |
| TcCLB.510311.120 | hypothetical protein                                          | -1,564 | 4,218E-33  |
| TcCLB.510409.20  | hypothetical protein, conserved (pseudogene)                  | -1,565 | 3,583E-16  |
| TcCLB.508251.50  | mucin-associated surface protein (MASP), putative (fragment)  | -1,565 | 0,00009851 |
| TcCLB.508885.10  | surface protease GP63 (pseudogene), putative                  | -1,566 | 2,233E-07  |

|                  |                                                         |        |            |
|------------------|---------------------------------------------------------|--------|------------|
| TcCLB.504423.15  | hypothetical protein, conserved                         | -1,567 | 2,078E-35  |
| TcCLB.504155.150 | surface protease GP63, putative                         | -1,567 | 1,637E-15  |
| TcCLB.508145.30  | RNA-binding protein, putative                           | -1,57  | 2,458E-10  |
| TcCLB.506183.90  | trans-sialidase (pseudogene), putative                  | -1,571 | 4,163E-17  |
| TcCLB.508013.70  | mucin TcMUCII, putative                                 | -1,571 | 3,234E-06  |
| TcCLB.503855.60  | hypothetical protein, conserved                         | -1,572 | 3,204E-48  |
| TcCLB.506859.180 | hypothetical protein, conserved                         | -1,572 | 3,266E-17  |
| TcCLB.404845.10  | trans-sialidase (pseudogene), putative                  | -1,573 | 8,194E-47  |
| TcCLB.510377.50  | trans-sialidase, Group V, putative                      | -1,574 | 0,00004566 |
| TcCLB.508209.94  | hypothetical protein                                    | -1,575 | 1,073E-30  |
| TcCLB.507485.10  | hypothetical protein, conserved                         | -1,575 | 1,893E-21  |
| TcCLB.509093.10  | mucin-associated surface protein (MASP), putative       | -1,575 | 2,667E-08  |
| TcCLB.505183.30  | malic enzyme, putative                                  | -1,576 | 1,386E-72  |
| TcCLB.507473.30  | trans-sialidase, Group II, putative                     | -1,576 | 1,499E-31  |
| TcCLB.510237.120 | mucin-associated surface protein (MASP), putative       | -1,576 | 9,412E-14  |
| TcCLB.506765.58  | trans-sialidase (pseudogene), putative                  | -1,576 | 3,237E-12  |
| TcCLB.511449.110 | surface protease GP63, putative                         | -1,577 | 3,373E-12  |
| TcCLB.511081.30  | mucin TcMUCII, putative                                 | -1,577 | 1,602E-08  |
| TcCLB.508121.110 | mucin-associated surface protein (MASP), putative       | -1,578 | 8,898E-17  |
| TcCLB.506671.20  | mucin TcMUC (pseudogene), putative                      | -1,578 | 2,653E-09  |
| TcCLB.510729.280 | trans-sialidase, Group III, putative                    | -1,579 | 2,36E-39   |
| TcCLB.507067.20  | surface protease GP63, putative                         | -1,58  | 2,791E-22  |
| TcCLB.506229.40  | leucine-rich repeat protein, putative                   | -1,58  | 6,736E-18  |
| TcCLB.508629.120 | mucin-associated surface protein (MASP), putative       | -1,581 | 6,119E-43  |
| TcCLB.506617.10  | surface protein TolT (TolT)                             | -1,581 | 3,898E-40  |
| TcCLB.510373.110 | hypothetical protein                                    | -1,581 | 0,00008749 |
| TcCLB.508943.4   | glycerol uptake protein, putative                       | -1,582 | 0,00002366 |
| TcCLB.510417.30  | mucin TcMUCII, putative                                 | -1,583 | 1,491E-10  |
| TcCLB.508873.510 | mucin-associated surface protein (MASP), putative       | -1,583 | 3,748E-10  |
| TcCLB.506199.10  | hypothetical protein, conserved                         | -1,584 | 9,21E-32   |
| TcCLB.406725.10  | trans-sialidase (pseudogene), putative                  | -1,584 | 3,574E-08  |
| TcCLB.506879.40  | mucin-associated surface protein (MASP, pseudogene), pu | -1,585 | 1,832E-11  |
| TcCLB.511255.10  | trans-sialidase, Group V, putative                      | -1,586 | 6,74E-10   |
| TcCLB.504787.20  | mucin TcMUCII, putative                                 | -1,587 | 3,245E-12  |
| TcCLB.510717.20  | surface antigen TASV, putative                          | -1,589 | 2,492E-66  |
| TcCLB.507957.29  | surface protease GP63 (pseudogene), putative            | -1,589 | 0,000126   |
| TcCLB.511127.60  | kinesin, putative                                       | -1,591 | 1,156E-76  |
| TcCLB.506801.80  | cysteine peptidase inhibitor (CHA)                      | -1,591 | 5,462E-38  |
| TcCLB.510701.40  | mucin-associated surface protein (MASP, pseudogene), pu | -1,591 | 0,0001599  |
| TcCLB.507485.30  | hypothetical protein, conserved                         | -1,592 | 1,055E-28  |
| TcCLB.511403.30  | mucin TcMUCII, putative                                 | -1,592 | 1,041E-06  |
| TcCLB.511173.64  | mucin-associated surface protein (MASP), putative       | -1,592 | 0,0009401  |
| TcCLB.511495.30  | hypothetical protein, conserved                         | -1,593 | 8,145E-32  |
| TcCLB.509897.70  | trans-sialidase, Group V, putative                      | -1,593 | 1,353E-19  |
| TcCLB.508121.56  | mucin-associated surface protein (MASP, pseudogene), pu | -1,593 | 2,774E-09  |

|                  |                                                          |        |            |
|------------------|----------------------------------------------------------|--------|------------|
| TcCLB.509267.3   | receptor-type adenylate cyclase, putative                | -1,593 | 3,313E-07  |
| TcCLB.511923.30  | trans-sialidase, Group V, putative                       | -1,594 | 2,369E-21  |
| TcCLB.508883.39  | mucin-associated surface protein (MASP, pseudogene), pu  | -1,595 | 3,704E-17  |
| TcCLB.507069.60  | mucin TcMUCII, putative                                  | -1,595 | 8,099E-07  |
| TcCLB.506767.215 | hypothetical protein, conserved (pseudogene)             | -1,595 | 0,001378   |
| TcCLB.506989.155 | hypothetical protein, conserved                          | -1,598 | 3,576E-27  |
| TcCLB.507637.180 | mucin-associated surface protein (MASP, pseudogene), pu  | -1,599 | 1,66E-23   |
| TcCLB.510275.306 | mucin-associated surface protein (MASP, pseudogene), pu  | -1,601 | 2,103E-17  |
| TcCLB.504081.280 | mucin-associated surface protein (MASP, pseudogene), pu  | -1,601 | 1,226E-07  |
| TcCLB.511439.90  | hypothetical protein, conserved                          | -1,602 | 5,559E-13  |
| TcCLB.506337.90  | surface antigen TASV, putative (TASV)                    | -1,603 | 1,555E-79  |
| TcCLB.511149.199 | mucin TcMUCII (pseudogene), putative                     | -1,603 | 0,0000753  |
| TcCLB.511311.30  | trans-sialidase, Group II, putative                      | -1,606 | 1,294E-24  |
| TcCLB.510933.90  | mucin-associated surface protein (MASP), putative        | -1,607 | 2,723E-14  |
| TcCLB.508983.20  | trans-sialidase (pseudogene), putative                   | -1,608 | 3,701E-25  |
| TcCLB.506909.155 | mucin-associated surface protein (MASP, pseudogene), pu  | -1,612 | 0,0000024  |
| TcCLB.506459.10  | mucin-associated surface protein (MASP), putative        | -1,613 | 2,513E-20  |
| TcCLB.506961.70  | trans-sialidase (pseudogene), putative                   | -1,614 | 1,592E-28  |
| TcCLB.506139.170 | trans-sialidase (pseudogene), putative                   | -1,614 | 2,356E-12  |
| TcCLB.460625.9   | trans-sialidase (pseudogene), putative                   | -1,614 | 8,626E-08  |
| TcCLB.506361.18  | mucin TcMUC (pseudogene), putative                       | -1,614 | 3,351E-06  |
| TcCLB.507699.170 | surface protease GP63 (pseudogene), putative             | -1,615 | 3,7E-27    |
| TcCLB.506173.240 | mucin TcMUCII, putative                                  | -1,616 | 5,397E-11  |
| TcCLB.506785.30  | mucin TcMUCII, putative                                  | -1,616 | 0,00000367 |
| TcCLB.504219.50  | hypothetical protein, conserved (pseudogene)             | -1,617 | 0,0003603  |
| TcCLB.508509.51  | mucin-associated surface protein (MASP, pseudogene), pu  | -1,62  | 3,329E-08  |
| TcCLB.506277.30  | mucin-associated surface protein (MASP, pseudogene), pu  | -1,621 | 1,117E-21  |
| TcCLB.506761.40  | mucin-associated surface protein (MASP, pseudogene), pu  | -1,621 | 1,615E-14  |
| TcCLB.508499.20  | mucin-associated surface protein (MASP), putative        | -1,622 | 8,493E-24  |
| TcCLB.506971.80  | mucin-associated surface protein (MASP), putative (fragm | -1,623 | 1,345E-11  |
| TcCLB.507071.34  | mucin TcMUCII, putative                                  | -1,623 | 0,0003268  |
| TcCLB.508873.103 | mucin-associated surface protein (MASP, pseudogene), pu  | -1,624 | 7,158E-08  |
| TcCLB.506939.40  | mucin TcMUCII, putative                                  | -1,624 | 3,02E-07   |
| TcCLB.506841.20  | trans-sialidase, Group I, putative                       | -1,625 | 6,119E-21  |
| TcCLB.505023.40  | mucin-associated surface protein (MASP), putative        | -1,626 | 4,23E-18   |
| TcCLB.507237.356 | syntaxin binding protein (pseudogene), putative          | -1,626 | 0,000066   |
| TcCLB.510697.40  | mucin-associated surface protein (MASP), putative        | -1,627 | 1,356E-11  |
| TcCLB.508999.70  | mucin-associated surface protein (MASP), putative        | -1,63  | 5,827E-16  |
| TcCLB.510197.190 | mucin-associated surface protein (MASP), putative        | -1,63  | 1,48E-12   |
| TcCLB.506229.60  | hypothetical protein, conserved                          | -1,631 | 8,736E-57  |
| TcCLB.508873.30  | mucin-associated surface protein (MASP), putative        | -1,631 | 4,015E-28  |
| TcCLB.511553.130 | mucin TcMUCII, putative                                  | -1,631 | 1,854E-18  |
| TcCLB.510269.60  | trans-sialidase (pseudogene), putative                   | -1,631 | 2,019E-17  |
| TcCLB.509755.50  | trans-sialidase, Group V, putative                       | -1,631 | 6,909E-17  |
| TcCLB.506763.35  | hypothetical protein, conserved (pseudogene)             | -1,631 | 1,008E-08  |

|                  |                                                          |        |            |
|------------------|----------------------------------------------------------|--------|------------|
| TcCLB.509867.70  | trans-sialidase, Group VI, putative                      | -1,633 | 4,689E-10  |
| TcCLB.503631.9   | hypothetical protein, conserved                          | -1,634 | 2,482E-46  |
| TcCLB.506679.280 | endonuclease/exonuclease/phosphatase, putative           | -1,634 | 3,733E-43  |
| TcCLB.504115.60  | trans-sialidase, Group V, putative                       | -1,634 | 7,751E-18  |
| TcCLB.508165.350 | mucin-associated surface protein (MASP), putative        | -1,635 | 3,406E-09  |
| TcCLB.511173.210 | mucin-associated surface protein (MASP), putative        | -1,636 | 1,659E-10  |
| TcCLB.508327.10  | mucin-associated surface protein (MASP), putative        | -1,637 | 0,0003737  |
| TcCLB.511603.380 | mucin-associated surface protein (MASP), putative        | -1,638 | 4,332E-12  |
| TcCLB.508365.284 | mucin-associated surface protein (MASP, pseudogene), pi  | -1,638 | 6,031E-12  |
| TcCLB.511247.9   | hypothetical protein, conserved                          | -1,642 | 1,215E-06  |
| TcCLB.511861.20  | trans-sialidase, Group V, putative                       | -1,643 | 9,219E-37  |
| TcCLB.509251.70  | mucin-associated surface protein (MASP, pseudogene), pi  | -1,643 | 2,586E-30  |
| TcCLB.507429.40  | mucin-associated surface protein (MASP, pseudogene), pi  | -1,643 | 4,128E-21  |
| TcCLB.508511.40  | mucin-associated surface protein (MASP, pseudogene), pi  | -1,645 | 9,875E-06  |
| TcCLB.508011.20  | mucin-associated surface protein (MASP, pseudogene), pi  | -1,645 | 0,0004339  |
| TcCLB.507081.100 | hypothetical protein, conserved                          | -1,646 | 3,415E-36  |
| TcCLB.509897.210 | mucin-associated surface protein (MASP, pseudogene), pi  | -1,646 | 2,967E-31  |
| TcCLB.507071.80  | trans-sialidase, Group VI, putative                      | -1,646 | 8,33E-13   |
| TcCLB.506703.74  | mucin-associated surface protein (MASP, pseudogene), pi  | -1,646 | 0,00006786 |
| TcCLB.509525.410 | mucin-associated surface protein (MASP, pseudogene), pi  | -1,648 | 2,739E-11  |
| TcCLB.508293.130 | hypothetical protein                                     | -1,649 | 0,0001801  |
| TcCLB.504533.40  | trans-sialidase, Group IV, putative                      | -1,65  | 1,56E-47   |
| TcCLB.508499.39  | trans-sialidase (pseudogene), putative                   | -1,65  | 3,217E-13  |
| TcCLB.506955.184 | mucin-associated surface protein (MASP, pseudogene), pi  | -1,65  | 8,139E-10  |
| TcCLB.509115.20  | trans-sialidase, Group V, putative                       | -1,651 | 6,443E-16  |
| TcCLB.510025.20  | mucin TcMUCII, putative                                  | -1,652 | 2,795E-15  |
| TcCLB.506297.350 | SKP1-like protein                                        | -1,653 | 0,00003513 |
| TcCLB.510023.10  | hypothetical protein, conserved (pseudogene)             | -1,654 | 2,833E-07  |
| TcCLB.506589.89  | mucin-associated surface protein (MASP, pseudogene), pi  | -1,656 | 3,586E-13  |
| TcCLB.510503.70  | trans-sialidase (pseudogene), putative                   | -1,657 | 2,158E-18  |
| TcCLB.510625.109 | mucin-associated surface protein (MASP), putative        | -1,657 | 0,0006611  |
| TcCLB.413409.10  | trans-sialidase, putative (fragment)                     | -1,658 | 8,6E-20    |
| TcCLB.508277.401 | magnesium and cobalt transport protein, putative (fragm  | -1,659 | 4,599E-55  |
| TcCLB.510587.10  | hypothetical protein                                     | -1,659 | 0,0003415  |
| TcCLB.510099.10  | hypothetical protein, conserved                          | -1,66  | 8,248E-57  |
| TcCLB.508875.20  | mucin-associated surface protein (MASP), putative (fragn | -1,66  | 3,569E-31  |
| TcCLB.511751.140 | hypothetical protein                                     | -1,661 | 1,006E-42  |
| TcCLB.511797.184 | mucin TcMUC (pseudogene), putative                       | -1,661 | 0,00000209 |
| TcCLB.510625.88  | mucin-associated surface protein (MASP), putative        | -1,661 | 0,0001099  |
| TcCLB.511183.200 | mucin-associated surface protein (MASP, pseudogene), pi  | -1,662 | 1,485E-28  |
| TcCLB.506763.190 | mucin TcMUCII, putative                                  | -1,662 | 1,484E-11  |
| TcCLB.508871.140 | mucin TcMUCII, putative                                  | -1,662 | 8,515E-10  |
| TcCLB.511175.50  | mucin TcMUC (pseudogene), putative                       | -1,663 | 7,502E-48  |
| TcCLB.506269.99  | mucin-associated surface protein (MASP), putative (fragn | -1,663 | 5,559E-32  |
| TcCLB.510629.290 | mucin-associated surface protein (MASP, pseudogene), pi  | -1,663 | 3,065E-12  |

|                  |                                                            |        |            |
|------------------|------------------------------------------------------------|--------|------------|
| TcCLB.503787.50  | mucin TcMUCII, putative                                    | -1,663 | 4,108E-11  |
| TcCLB.510693.19  | mucin-associated surface protein (MASP, pseudogene), pi    | -1,664 | 8,132E-21  |
| TcCLB.506805.10  | mucin-associated surface protein (MASP), putative          | -1,664 | 1,098E-09  |
| TcCLB.511079.80  | mucin TcMUCII, putative                                    | -1,664 | 0,0009556  |
| TcCLB.505655.10  | trans-sialidase (pseudogene), putative                     | -1,665 | 1,596E-19  |
| TcCLB.508041.10  | SKP1-like protein                                          | -1,665 | 1,409E-14  |
| TcCLB.504239.195 | mucin-associated surface protein (MASP, pseudogene), pi    | -1,665 | 6,334E-09  |
| TcCLB.510095.20  | trans-sialidase, Group II, putative                        | -1,665 | 0,00001687 |
| TcCLB.509767.10  | neutral sphingomyelinase activation associated factor-like | -1,666 | 4,858E-71  |
| TcCLB.508563.20  | trans-sialidase, Group II, putative                        | -1,667 | 2,754E-29  |
| TcCLB.505025.100 | mucin TcMUCII (pseudogene), putative                       | -1,668 | 5,917E-10  |
| TcCLB.511183.409 | mucin TcMUC (pseudogene), putative                         | -1,668 | 7,26E-09   |
| TcCLB.510933.110 | mucin-associated surface protein (MASP, pseudogene), pi    | -1,669 | 7,259E-10  |
| TcCLB.504081.540 | trans-sialidase, Group V, putative                         | -1,67  | 7,568E-15  |
| TcCLB.507747.80  | mucin TcMUCII, putative                                    | -1,67  | 1,187E-07  |
| TcCLB.508115.20  | trans-sialidase, putative                                  | -1,671 | 1,295E-06  |
| TcCLB.511599.110 | mucin TcMUCII, putative                                    | -1,673 | 3,703E-09  |
| TcCLB.503479.40  | hypothetical protein, conserved                            | -1,674 | 2,629E-96  |
| TcCLB.504239.330 | surface protease GP63 (pseudogene), putative               | -1,676 | 6,429E-09  |
| TcCLB.506445.90  | magnesium and cobalt transport protein, putative           | -1,677 | 7,817E-56  |
| TcCLB.504127.20  | hypothetical protein                                       | -1,677 | 4,867E-27  |
| TcCLB.506617.5   | surface protein TolT, putative (fragment)                  | -1,678 | 1,469E-40  |
| TcCLB.509387.19  | trans-sialidase, putative                                  | -1,679 | 4,82E-31   |
| TcCLB.510207.40  | mucin-associated surface protein (MASP), putative          | -1,679 | 1,295E-21  |
| TcCLB.508221.590 | trans-sialidase, Group V, putative                         | -1,679 | 1,116E-09  |
| TcCLB.509081.80  | hypothetical protein, conserved (pseudogene)               | -1,679 | 3,406E-09  |
| TcCLB.508143.90  | trans-sialidase (pseudogene), putative                     | -1,68  | 5,216E-33  |
| TcCLB.508589.10  | hypothetical protein                                       | -1,681 | 1,522E-19  |
| TcCLB.506753.230 | hypothetical protein, conserved                            | -1,682 | 2,297E-54  |
| TcCLB.507747.10  | surface protease GP63, putative                            | -1,683 | 2,282E-20  |
| TcCLB.511259.170 | trans-sialidase (pseudogene), putative                     | -1,684 | 7,306E-19  |
| TcCLB.503519.20  | mucin TcMUCII, putative                                    | -1,684 | 7,395E-12  |
| TcCLB.508165.220 | mucin TcMUCII (pseudogene), putative                       | -1,685 | 1,972E-06  |
| TcCLB.511797.200 | mucin-associated surface protein (MASP), putative          | -1,686 | 1,758E-37  |
| TcCLB.503977.15  | surface protease GP63 (pseudogene), putative               | -1,686 | 3,522E-08  |
| TcCLB.503773.50  | Nucleolar protein 56, putative (fragment) (NOP56)          | -1,687 | 8,155E-33  |
| TcCLB.508221.40  | mucin TcMUCII, putative                                    | -1,688 | 4,023E-08  |
| TcCLB.506599.300 | hypothetical protein                                       | -1,688 | 0,001422   |
| TcCLB.511165.50  | Enriched in surface-labeled proteome protein 7 (ESP7)      | -1,689 | 2,779E-44  |
| TcCLB.508011.110 | mucin-associated surface protein (MASP), putative          | -1,689 | 3,554E-21  |
| TcCLB.508293.140 | mucin-associated surface protein (MASP), putative          | -1,689 | 0,00003561 |
| TcCLB.507953.170 | hypothetical protein                                       | -1,689 | 0,0002721  |
| TcCLB.509525.390 | mucin-associated surface protein (MASP), putative          | -1,691 | 3,464E-17  |
| TcCLB.511613.80  | mucin-associated surface protein (MASP), putative          | -1,691 | 1,065E-14  |
| TcCLB.510209.27  | mucin-associated surface protein (MASP), putative          | -1,691 | 1,675E-09  |

|                  |                                                          |        |            |
|------------------|----------------------------------------------------------|--------|------------|
| TcCLB.506767.60  | hypothetical protein, conserved (pseudogene)             | -1,692 | 2,456E-08  |
| TcCLB.510197.180 | trans-sialidase, Group VI, putative                      | -1,693 | 2,794E-21  |
| TcCLB.506967.70  | mucin-associated surface protein (MASP), putative        | -1,693 | 1,013E-18  |
| TcCLB.511921.150 | trans-sialidase, Group V, putative                       | -1,693 | 1,298E-17  |
| TcCLB.510271.30  | trans-sialidase (pseudogene), putative                   | -1,694 | 7,063E-22  |
| TcCLB.510021.210 | mucin-associated surface protein (MASP, pseudogene), pi  | -1,694 | 7,174E-07  |
| TcCLB.506131.120 | trans-sialidase (pseudogene), putative                   | -1,695 | 1,019E-13  |
| TcCLB.506277.20  | mucin TcMUCII (pseudogene), putative                     | -1,697 | 7,126E-07  |
| TcCLB.511451.80  | trans-sialidase, Group V, putative                       | -1,698 | 1,137E-32  |
| TcCLB.504115.10  | trans-sialidase, Group VIII, putative                    | -1,699 | 5,701E-53  |
| TcCLB.504081.350 | mucin-associated surface protein (MASP), putative        | -1,699 | 3,677E-13  |
| TcCLB.506899.10  | trans-sialidase, putative                                | -1,7   | 9,837E-06  |
| TcCLB.506239.50  | palmitoyl acyltransferase 6, putative                    | -1,701 | 5,545E-34  |
| TcCLB.511849.30  | mucin-associated surface protein (MASP), putative        | -1,701 | 1,498E-14  |
| TcCLB.508221.580 | mucin-associated surface protein (MASP), putative        | -1,701 | 2,928E-07  |
| TcCLB.506755.10  | hypothetical protein, conserved                          | -1,703 | 4,749E-50  |
| TcCLB.508107.30  | trans-sialidase, Group VI, putative                      | -1,707 | 2,81E-09   |
| TcCLB.507605.13  | mucin-associated surface protein (MASP), putative (fragm | -1,707 | 0,00003498 |
| TcCLB.510033.30  | trans-sialidase, Group V, putative                       | -1,708 | 6,48E-22   |
| TcCLB.510105.310 | mucin-associated surface protein (MASP), putative        | -1,708 | 5,725E-16  |
| TcCLB.510023.30  | mucin-associated surface protein (MASP), putative (fragm | -1,708 | 6,875E-14  |
| TcCLB.482369.29  | arginine kinase (fragment)                               | -1,709 | 9,417E-11  |
| TcCLB.511173.200 | hypothetical protein                                     | -1,709 | 4,472E-10  |
| TcCLB.507255.20  | trans-sialidase, Group II, putative                      | -1,711 | 5,323E-42  |
| TcCLB.511605.10  | hypothetical protein                                     | -1,711 | 0,0009129  |
| TcCLB.511919.10  | mucin-associated surface protein (MASP), putative        | -1,713 | 8,351E-30  |
| TcCLB.505267.20  | trans-sialidase (pseudogene), putative                   | -1,713 | 5,658E-15  |
| TcCLB.506499.149 | mucin TcMUCII, putative                                  | -1,714 | 1,992E-13  |
| TcCLB.508493.60  | trans-sialidase (pseudogene), putative                   | -1,715 | 1,725E-36  |
| TcCLB.504039.210 | hypothetical protein                                     | -1,715 | 0,002599   |
| TcCLB.511255.130 | mucin-associated surface protein (MASP), putative        | -1,717 | 1,308E-12  |
| TcCLB.460757.10  | receptor-type adenylate cyclase, putative                | -1,718 | 2,137E-26  |
| TcCLB.509699.30  | mucin TcMUCII (pseudogene), putative                     | -1,718 | 4,36E-08   |
| TcCLB.510197.220 | mucin-associated surface protein (MASP, pseudogene), pi  | -1,721 | 2,32E-21   |
| TcCLB.510729.140 | NIMA-related kinase, putative                            | -1,722 | 8,449E-25  |
| TcCLB.510503.100 | surface protease GP63, putative                          | -1,724 | 9,718E-17  |
| TcCLB.510629.70  | mucin-associated surface protein (MASP), putative        | -1,724 | 3,598E-06  |
| TcCLB.510371.141 | hypothetical protein, conserved (pseudogene)             | -1,725 | 0,0004038  |
| TcCLB.508873.25  | hypothetical protein                                     | -1,726 | 4,222E-15  |
| TcCLB.506499.80  | mucin-associated surface protein (MASP), putative        | -1,726 | 1,003E-06  |
| TcCLB.508647.280 | malic enzyme                                             | -1,727 | 2,45E-100  |
| TcCLB.508495.100 | trans-sialidase, Group V, putative                       | -1,727 | 1,283E-19  |
| TcCLB.510387.40  | mucin-associated surface protein (MASP), putative        | -1,727 | 5,328E-12  |
| TcCLB.510979.10  | mucin-associated surface protein (MASP), putative        | -1,73  | 2,174E-20  |
| TcCLB.504031.35  | mucin TcMUCII (pseudogene), putative                     | -1,73  | 3,944E-08  |

|                  |                                                          |        |           |
|------------------|----------------------------------------------------------|--------|-----------|
| TcCLB.506767.119 | surface protease GP63 (pseudogene), putative             | -1,731 | 0,000051  |
| TcCLB.448661.10  | mucin-associated surface protein (MASP), putative (fragn | -1,732 | 2,035E-14 |
| TcCLB.510565.150 | surface protease GP63, putative                          | -1,733 | 1,921E-52 |
| TcCLB.511553.120 | surface protease GP63, putative                          | -1,733 | 4,17E-15  |
| TcCLB.506589.130 | trans-sialidase (pseudogene), putative                   | -1,734 | 7,469E-29 |
| TcCLB.506973.105 | mucin-associated surface protein (MASP, pseudogene), pi  | -1,734 | 1,987E-10 |
| TcCLB.506115.9   | dispersed gene family protein 1 (DGF-1), putative        | -1,735 | 1,529E-11 |
| TcCLB.507953.140 | trans-sialidase, Group V, putative                       | -1,735 | 2,603E-07 |
| TcCLB.508789.60  | mucin TcMUCII, putative                                  | -1,736 | 4,011E-20 |
| TcCLB.503649.10  | mucin-associated surface protein (MASP, pseudogene), pi  | -1,737 | 2,012E-10 |
| TcCLB.508495.9   | mucin-associated surface protein (MASP, pseudogene), pi  | -1,737 | 2,632E-08 |
| TcCLB.505025.90  | mucin-associated surface protein (MASP), putative        | -1,737 | 1,703E-07 |
| TcCLB.507237.359 | surface protease GP63 (pseudogene), putative             | -1,739 | 0,001387  |
| TcCLB.511185.100 | mucin-associated surface protein (MASP), putative        | -1,74  | 0,0001721 |
| TcCLB.506479.120 | cytidine triphosphate synthase, putative                 | -1,741 | 7,539E-36 |
| TcCLB.509361.10  | surface protease GP63 (pseudogene), putative             | -1,742 | 5,808E-06 |
| TcCLB.509525.50  | hypothetical protein                                     | -1,742 | 0,0001568 |
| TcCLB.508761.280 | mucin TcMUCII, putative                                  | -1,743 | 5,128E-12 |
| TcCLB.503609.100 | mucin TcMUCII, putative                                  | -1,743 | 0,0001172 |
| TcCLB.511705.10  | receptor-type adenylate cyclase, putative                | -1,744 | 1,343E-44 |
| TcCLB.511259.189 | mucin TcMUCII, putative                                  | -1,745 | 4,164E-08 |
| TcCLB.506855.190 | hypothetical protein, conserved                          | -1,746 | 4,323E-76 |
| TcCLB.408547.10  | mucin-associated surface protein (MASP), putative        | -1,747 | 2,543E-16 |
| TcCLB.507947.10  | conserved protein, unknown function                      | -1,748 | 2,181E-19 |
| TcCLB.511267.40  | hypothetical protein, conserved                          | -1,749 | 3,547E-18 |
| TcCLB.506067.230 | trans-sialidase (pseudogene), putative                   | -1,75  | 3,737E-17 |
| TcCLB.508165.100 | mucin TcMUCII, putative                                  | -1,75  | 7,484E-11 |
| TcCLB.508011.30  | mucin TcMUCII, putative                                  | -1,75  | 6,523E-08 |
| TcCLB.504239.10  | hypothetical protein, conserved (pseudogene)             | -1,751 | 9,071E-08 |
| TcCLB.509899.40  | trans-sialidase (pseudogene), putative                   | -1,752 | 1,359E-26 |
| TcCLB.510475.60  | hypothetical protein                                     | -1,754 | 0,002426  |
| TcCLB.503417.30  | mucin TcMUCII, putative                                  | -1,755 | 1,335E-08 |
| TcCLB.507637.150 | mucin-associated surface protein (MASP, pseudogene), pi  | -1,759 | 2,348E-29 |
| TcCLB.506681.40  | hypothetical protein, conserved                          | -1,759 | 8,883E-26 |
| TcCLB.508247.130 | mucin-associated surface protein (MASP), putative        | -1,759 | 6,263E-08 |
| TcCLB.504007.20  | trans-sialidase, Group V, putative                       | -1,761 | 2,959E-12 |
| TcCLB.508013.50  | mucin TcMUCII, putative                                  | -1,761 | 1,052E-08 |
| TcCLB.507959.90  | mucin TcMUCII, putative                                  | -1,761 | 0,0000762 |
| TcCLB.508047.70  | mucin-associated surface protein (MASP), putative        | -1,762 | 3,8E-22   |
| TcCLB.508295.70  | hypothetical protein                                     | -1,762 | 1,9E-09   |
| TcCLB.506617.20  | surface protein TolT (TolT)                              | -1,763 | 2,172E-37 |
| TcCLB.503783.34  | mucin-associated surface protein (MASP, pseudogene), pi  | -1,763 | 2,042E-16 |
| TcCLB.507083.20  | dispersed gene family protein 1 (DGF-1), putative        | -1,765 | 2,617E-52 |
| TcCLB.509287.130 | surface protease GP63 (pseudogene), putative             | -1,768 | 6,13E-37  |
| TcCLB.509753.100 | mucin-associated surface protein (MASP), putative        | -1,768 | 1,369E-10 |



|                  |                                                            |        |            |
|------------------|------------------------------------------------------------|--------|------------|
| TcCLB.507699.64  | mucin TcMUCII, putative                                    | -1,769 | 5,419E-10  |
| TcCLB.510013.200 | 90 kDa surface protein, putative                           | -1,77  | 1,246E-11  |
| TcCLB.509545.70  | mucin TcMUCII, putative                                    | -1,77  | 8,46E-07   |
| TcCLB.507937.50  | mucin-associated surface protein (MASP), putative          | -1,771 | 5,899E-13  |
| TcCLB.511597.50  | trans-sialidase, putative (fragment)                       | -1,772 | 0,00004983 |
| TcCLB.511141.10  | hypothetical protein, conserved                            | -1,773 | 3,464E-35  |
| TcCLB.503947.20  | mucin-associated surface protein (MASP), putative          | -1,773 | 2,58E-28   |
| TcCLB.507041.120 | variant-surface-glycoprotein phospholipase C, putative     | -1,774 | 1,56E-55   |
| TcCLB.509699.60  | mucin-associated surface protein (MASP, pseudogene), pu    | -1,774 | 1,242E-36  |
| TcCLB.508097.60  | mucin-associated surface protein (MASP), putative          | -1,774 | 1,297E-08  |
| TcCLB.509287.110 | mucin-associated surface protein (MASP), putative          | -1,775 | 3,095E-25  |
| TcCLB.511701.19  | surface protease GP63, putative (fragment)                 | -1,775 | 0,0004395  |
| TcCLB.506789.334 | hypothetical protein, conserved                            | -1,777 | 3,422E-34  |
| TcCLB.452475.10  | trans-sialidase, Group V, putative                         | -1,778 | 1,086E-15  |
| TcCLB.508759.20  | trans-sialidase, Group V, putative                         | -1,779 | 1,169E-13  |
| TcCLB.506231.10  | trans-sialidase, putative                                  | -1,782 | 1,115E-25  |
| TcCLB.511401.130 | mucin-associated surface protein (MASP, pseudogene), pu    | -1,782 | 2,632E-17  |
| TcCLB.511843.70  | trans-sialidase, Group V, putative                         | -1,782 | 5,102E-14  |
| TcCLB.506909.20  | mucin TcMUCI, putative                                     | -1,782 | 1,658E-13  |
| TcCLB.509265.110 | trans-sialidase, Group IV, putative                        | -1,783 | 3,899E-29  |
| TcCLB.506613.100 | mucin TcMUCII (pseudogene), putative                       | -1,784 | 3,245E-12  |
| TcCLB.506529.600 | metacyclin II, putative                                    | -1,784 | 1,675E-11  |
| TcCLB.506763.330 | mucin-associated surface protein (MASP), putative          | -1,785 | 9,969E-12  |
| TcCLB.506813.200 | mucin-like glycoprotein (pseudogene), putative             | -1,786 | 7,742E-07  |
| TcCLB.509739.10  | trans-sialidase, Group II, putative                        | -1,787 | 1,552E-26  |
| TcCLB.506321.180 | hypothetical protein                                       | -1,787 | 0,00001458 |
| TcCLB.504261.20  | trans-sialidase, Group VI, putative                        | -1,788 | 4,084E-13  |
| TcCLB.508221.680 | serine-alanine-and proline-rich protein (pseudogene), puti | -1,788 | 4,021E-07  |
| TcCLB.509153.80  | Present in the outer mitochondrial membrane proteome 3     | -1,789 | 5,338E-31  |
| TcCLB.507091.120 | mucin-associated surface protein (MASP), putative          | -1,789 | 1,266E-07  |
| TcCLB.509897.150 | mucin-associated surface protein (MASP), putative          | -1,791 | 4,009E-59  |
| TcCLB.511565.30  | mucin TcMUCII, putative                                    | -1,791 | 1,146E-12  |
| TcCLB.509079.10  | surface protease GP63 (pseudogene), putative               | -1,791 | 9,386E-09  |
| TcCLB.510275.110 | trans-sialidase (pseudogene), putative                     | -1,792 | 4,314E-24  |
| TcCLB.509805.10  | protein kinase A catalytic subunit, putative               | -1,792 | 1,207E-18  |
| TcCLB.506177.40  | palmitoyl acyltransferase 6, putative                      | -1,794 | 1,739E-28  |
| TcCLB.511269.50  | protein kinase A catalytic subunit, putative (PKAC3)       | -1,795 | 4,334E-24  |
| TcCLB.511643.73  | mucin-associated surface protein (MASP, pseudogene), pu    | -1,796 | 4,637E-12  |
| TcCLB.510807.50  | mucin-associated surface protein (MASP), putative          | -1,796 | 2,087E-11  |
| TcCLB.506245.250 | trans-sialidase, Group V, putative                         | -1,797 | 2,204E-17  |
| TcCLB.503761.30  | mucin TcMUCII, putative                                    | -1,802 | 1,587E-08  |
| TcCLB.506289.180 | mucin-associated surface protein (MASP, pseudogene), pu    | -1,803 | 1,115E-15  |
| TcCLB.509753.60  | mucin-associated surface protein (MASP), putative          | -1,803 | 1,085E-09  |
| TcCLB.508761.90  | mucin-associated surface protein (MASP), putative          | -1,803 | 0,00004786 |
| TcCLB.510377.250 | mucin TcMUCII (pseudogene), putative                       | -1,804 | 9,901E-08  |

|                  |                                                              |        |            |
|------------------|--------------------------------------------------------------|--------|------------|
| TcCLB.507895.60  | UDP-Gal or UDP-GlcNAc-dependent glycosyltransferase, $\beta$ | -1,806 | 7,406E-16  |
| TcCLB.507313.20  | trans-sialidase, Group VIII, putative                        | -1,808 | 3,317E-17  |
| TcCLB.508759.40  | mucin-associated surface protein (MASP), putative            | -1,809 | 5,303E-25  |
| TcCLB.511255.360 | mucin-associated surface protein (MASP), putative            | -1,809 | 1,484E-12  |
| TcCLB.507613.10  | dispersed gene family protein 1 (DGF-1), putative            | -1,809 | 6,309E-06  |
| TcCLB.508229.40  | trans-sialidase, Group V, putative                           | -1,81  | 4,803E-52  |
| TcCLB.468217.30  | trans-sialidase, putative                                    | -1,813 | 1,786E-23  |
| TcCLB.508633.130 | 90 kDa surface protein, putative                             | -1,813 | 1,556E-19  |
| TcCLB.506131.84  | mucin-associated surface protein (MASP), putative            | -1,813 | 3,63E-12   |
| TcCLB.507747.114 | mucin-associated surface protein (MASP, pseudogene), pi      | -1,813 | 3,453E-11  |
| TcCLB.506589.140 | mucin-associated surface protein (MASP), putative            | -1,814 | 3,893E-21  |
| TcCLB.511681.20  | histone H4, putative                                         | -1,815 | 6,218E-43  |
| TcCLB.506911.10  | mucin TcMUCII, putative                                      | -1,815 | 1,409E-07  |
| TcCLB.510361.200 | mucin TcMUCII, putative                                      | -1,815 | 5,847E-07  |
| TcCLB.508125.14  | mucin-associated surface protein (MASP), putative (fragn     | -1,816 | 4,167E-11  |
| TcCLB.511797.120 | mucin-associated surface protein (MASP), putative            | -1,817 | 4,451E-20  |
| TcCLB.509545.40  | trans-sialidase (pseudogene), putative                       | -1,819 | 6,941E-22  |
| TcCLB.508013.110 | mucin-associated surface protein (MASP), putative            | -1,822 | 1,08E-12   |
| TcCLB.510085.4   | mucin TcMUCII (pseudogene), putative                         | -1,822 | 5,793E-08  |
| TcCLB.507523.80  | mucin-associated surface protein (MASP), putative            | -1,824 | 3,106E-16  |
| TcCLB.507357.80  | mucin TcMUCII, putative                                      | -1,825 | 3,033E-10  |
| TcCLB.504039.70  | hypothetical protein                                         | -1,825 | 1,123E-06  |
| TcCLB.510715.90  | trans-sialidase, Group V, putative                           | -1,827 | 7,3E-19    |
| TcCLB.510391.40  | mucin TcMUCII, putative                                      | -1,828 | 6,03E-11   |
| TcCLB.504039.200 | mucin-associated surface protein (MASP), putative            | -1,828 | 0,001654   |
| TcCLB.508325.230 | trans-sialidase, Group IV, putative                          | -1,83  | 1,943E-135 |
| TcCLB.506309.140 | mucin-associated surface protein (MASP), putative            | -1,83  | 0,0002742  |
| TcCLB.508483.13  | trans-sialidase (pseudogene), putative                       | -1,832 | 1,163E-13  |
| TcCLB.511603.20  | mucin TcMUCII, putative                                      | -1,832 | 6,166E-11  |
| TcCLB.504081.400 | mucin-associated surface protein (MASP), putative            | -1,833 | 4,495E-16  |
| TcCLB.507611.260 | trans-sialidase (pseudogene), putative                       | -1,833 | 6,298E-10  |
| TcCLB.508495.80  | mucin-associated surface protein (MASP, pseudogene), pi      | -1,833 | 1,653E-06  |
| TcCLB.506599.120 | surface protease GP63 (pseudogene), putative                 | -1,835 | 6,994E-06  |
| TcCLB.510279.330 | mucin-associated surface protein (MASP), putative            | -1,836 | 2,433E-17  |
| TcCLB.503849.51  | mucin TcMUCII (pseudogene), putative                         | -1,836 | 2,108E-12  |
| TcCLB.511245.120 | hypothetical protein, conserved                              | -1,837 | 1,408E-44  |
| TcCLB.504155.160 | mucin-associated surface protein (MASP), putative            | -1,837 | 7,334E-20  |
| TcCLB.507295.50  | mucin-associated surface protein (MASP), putative            | -1,84  | 1,627E-35  |
| TcCLB.511565.10  | mucin TcMUCII, putative (fragment)                           | -1,84  | 3,099E-06  |
| TcCLB.506329.20  | mucin TcMUCII, putative                                      | -1,841 | 3,37E-09   |
| TcCLB.508677.40  | trans-sialidase, Group VIII, putative                        | -1,843 | 1,083E-71  |
| TcCLB.509867.60  | mucin-associated surface protein (MASP), putative            | -1,845 | 3,921E-23  |
| TcCLB.509631.90  | mucin TcMUCII, putative                                      | -1,847 | 4,686E-15  |
| TcCLB.403875.10  | cysteine peptidase, Clan CA, family C51, putative            | -1,848 | 2,067E-84  |
| TcCLB.511603.190 | mucin-associated surface protein (MASP), putative            | -1,848 | 7,408E-12  |

|                  |                                                         |        |           |
|------------------|---------------------------------------------------------|--------|-----------|
| TcCLB.506755.60  | hypothetical protein, conserved                         | -1,85  | 7,672E-49 |
| TcCLB.508977.20  | mucin-associated surface protein (MASP), putative       | -1,85  | 9,829E-13 |
| TcCLB.503741.20  | mucin-associated surface protein (MASP, pseudogene), pu | -1,852 | 1,364E-31 |
| TcCLB.506763.340 | mucin TcMUCII, putative                                 | -1,852 | 3,852E-10 |
| TcCLB.506925.250 | hypothetical protein, conserved (pseudogene)            | -1,853 | 1,592E-58 |
| TcCLB.510979.50  | mucin-associated surface protein (MASP), putative       | -1,853 | 6,551E-33 |
| TcCLB.508481.30  | trans-sialidase (pseudogene), putative                  | -1,853 | 1,463E-09 |
| TcCLB.508147.79  | mucin TcMUCII, putative                                 | -1,853 | 1,415E-07 |
| TcCLB.511057.60  | mucin-associated surface protein (MASP), putative       | -1,854 | 2,177E-18 |
| TcCLB.509545.50  | mucin-associated surface protein (MASP), putative       | -1,854 | 7,512E-18 |
| TcCLB.507633.80  | trans-sialidase, Group V, putative                      | -1,855 | 2,983E-14 |
| TcCLB.508313.130 | mucin TcMUCII, putative                                 | -1,855 | 8,319E-10 |
| TcCLB.511553.45  | surface protease GP63 (pseudogene), putative            | -1,855 | 3,92E-08  |
| TcCLB.508165.30  | mucin-associated surface protein (MASP), putative       | -1,856 | 1,166E-13 |
| TcCLB.506281.90  | mucin TcMUCII, putative                                 | -1,858 | 1,733E-07 |
| TcCLB.508365.180 | hypothetical protein                                    | -1,858 | 7,251E-06 |
| TcCLB.506759.230 | hypothetical protein                                    | -1,859 | 0,0003192 |
| TcCLB.509663.47  | trans-sialidase (pseudogene), putative                  | -1,86  | 3,008E-17 |
| TcCLB.510191.10  | mucin-associated surface protein (MASP), putative       | -1,86  | 8,173E-15 |
| TcCLB.510275.250 | mucin-associated surface protein (MASP), putative       | -1,861 | 1,952E-38 |
| TcCLB.508433.200 | trans-sialidase (pseudogene), putative                  | -1,861 | 5,127E-22 |
| TcCLB.510157.20  | hypothetical protein, conserved                         | -1,861 | 2,961E-11 |
| TcCLB.506671.10  | mucin-associated surface protein (MASP), putative       | -1,862 | 5,128E-24 |
| TcCLB.503973.280 | mucin-associated surface protein (MASP), putative       | -1,863 | 3,264E-15 |
| TcCLB.507959.350 | mucin-associated surface protein (MASP), putative       | -1,865 | 5,499E-44 |
| TcCLB.504039.170 | mucin-associated surface protein (MASP, pseudogene), pu | -1,866 | 1,719E-09 |
| TcCLB.506309.100 | mucin-associated surface protein (MASP, pseudogene), pu | -1,867 | 3,406E-06 |
| TcCLB.508745.60  | mucin TcMUCII, putative                                 | -1,868 | 2,793E-17 |
| TcCLB.506769.4   | mucin-associated surface protein (MASP, pseudogene), pu | -1,868 | 2,854E-12 |
| TcCLB.506289.230 | mucin-associated surface protein (MASP, pseudogene), pu | -1,869 | 1,784E-24 |
| TcCLB.508703.20  | trans-sialidase (pseudogene), putative                  | -1,869 | 1,984E-14 |
| TcCLB.511439.20  | lipase, putative                                        | -1,87  | 4,064E-28 |
| TcCLB.510025.60  | hypothetical protein                                    | -1,87  | 0,0001641 |
| TcCLB.506615.29  | mucin-associated surface protein (MASP, pseudogene), pu | -1,871 | 1,243E-72 |
| TcCLB.511089.15  | hypothetical protein                                    | -1,871 | 2,518E-10 |
| TcCLB.508979.60  | mucin-associated surface protein (MASP), putative       | -1,872 | 1,096E-34 |
| TcCLB.510355.41  | mucin-associated surface protein (MASP, pseudogene), pu | -1,873 | 1,292E-14 |
| TcCLB.509195.61  | mucin TcMUCII, putative                                 | -1,876 | 2,044E-12 |
| TcCLB.511907.160 | mucin-associated surface protein (MASP, pseudogene), pu | -1,877 | 1,532E-43 |
| TcCLB.510805.60  | surface protease GP63 (pseudogene), putative            | -1,877 | 8,525E-08 |
| TcCLB.446785.10  | trans-sialidase, putative (fragment)                    | -1,878 | 3,274E-42 |
| TcCLB.507075.30  | trans-sialidase (pseudogene), putative                  | -1,878 | 7,63E-35  |
| TcCLB.506459.219 | mucin TcMUCII, putative                                 | -1,878 | 1,028E-21 |
| TcCLB.507069.220 | mucin-associated surface protein (MASP), putative       | -1,879 | 1,381E-15 |
| TcCLB.510191.40  | trans-sialidase (pseudogene), putative                  | -1,88  | 1,071E-08 |

|                  |                                                               |        |            |
|------------------|---------------------------------------------------------------|--------|------------|
| TcCLB.506067.300 | trans-sialidase, Group V, putative                            | -1,881 | 5,864E-27  |
| TcCLB.503609.60  | mucin-associated surface protein (MASP), putative             | -1,882 | 3,425E-14  |
| TcCLB.504787.99  | mucin TcMUCII, putative                                       | -1,882 | 3,057E-12  |
| TcCLB.508489.10  | hypothetical protein, conserved                               | -1,883 | 1,473E-55  |
| TcCLB.510297.40  | hypothetical protein                                          | -1,884 | 2,645E-42  |
| TcCLB.508175.60  | hypothetical protein, conserved                               | -1,885 | 1,579E-46  |
| TcCLB.506597.20  | mucin-associated surface protein (MASP, pseudogene), putative | -1,886 | 5,046E-11  |
| TcCLB.510025.165 | hypothetical protein, conserved (pseudogene)                  | -1,886 | 9,333E-10  |
| TcCLB.503717.71  | trans-sialidase (pseudogene), putative                        | -1,886 | 2,347E-06  |
| TcCLB.506971.10  | mucin-associated surface protein (MASP), putative             | -1,887 | 1,253E-15  |
| TcCLB.508789.220 | mucin TcMUCII, putative                                       | -1,888 | 1,27E-10   |
| TcCLB.507107.30  | UDP-Gal or UDP-GlcNAc-dependent glycosyltransferase, putative | -1,889 | 6,357E-14  |
| TcCLB.506279.200 | mucin TcMUCII, putative                                       | -1,889 | 9,17E-10   |
| TcCLB.506951.60  | mucin-associated surface protein (MASP), putative             | -1,89  | 9,222E-51  |
| TcCLB.511173.50  | mucin-associated surface protein (MASP), putative             | -1,89  | 6,102E-36  |
| TcCLB.510025.50  | trans-sialidase, Group V, putative                            | -1,892 | 1,449E-46  |
| TcCLB.511117.50  | surface protease GP63, putative                               | -1,892 | 3,29E-16   |
| TcCLB.508163.10  | mucin-associated surface protein (MASP, pseudogene), putative | -1,893 | 0,00001617 |
| TcCLB.511907.130 | mucin-like glycoprotein, putative                             | -1,894 | 1,735E-34  |
| TcCLB.509699.200 | mucin TcMUCII, putative                                       | -1,894 | 1,774E-06  |
| TcCLB.506767.110 | mucin-associated surface protein (MASP), putative             | -1,895 | 8,892E-23  |
| TcCLB.504975.10  | mucin-associated surface protein (MASP, pseudogene), putative | -1,895 | 9,477E-17  |
| TcCLB.506813.80  | trans-sialidase, Group V, putative                            | -1,895 | 1,238E-12  |
| TcCLB.504039.120 | mucin TcMUCII, putative                                       | -1,896 | 4,522E-10  |
| TcCLB.507237.260 | mucin TcMUCII, putative                                       | -1,896 | 9,577E-08  |
| TcCLB.511553.10  | mucin-associated surface protein (MASP), putative             | -1,897 | 1,39E-24   |
| TcCLB.506067.198 | mucin-associated surface protein (MASP, pseudogene), putative | -1,897 | 7,034E-09  |
| TcCLB.506563.70  | calpain-like cysteine peptidase (pseudogene), putative        | -1,898 | 8,221E-41  |
| TcCLB.510377.420 | surface protease GP63, putative                               | -1,898 | 0,00006717 |
| TcCLB.510371.50  | mucin-associated surface protein (MASP), putative             | -1,899 | 2,352E-25  |
| TcCLB.507437.10  | mucin-associated surface protein (MASP), putative             | -1,899 | 3,131E-20  |
| TcCLB.510363.320 | mucin-associated surface protein (MASP), putative             | -1,9   | 1,018E-38  |
| TcCLB.511599.120 | mucin-associated surface protein (MASP), putative             | -1,9   | 3,798E-15  |
| TcCLB.506139.1   | mucin-associated surface protein (MASP), putative (fragment)  | -1,9   | 0,00001347 |
| TcCLB.507959.300 | mucin-associated surface protein (MASP), putative             | -1,901 | 9,669E-27  |
| TcCLB.509915.50  | trans-sialidase (pseudogene), putative                        | -1,902 | 2,115E-10  |
| TcCLB.508161.10  | mucin-associated surface protein (MASP), putative             | -1,902 | 2,77E-09   |
| TcCLB.506609.80  | mucin TcMUCII, putative                                       | -1,905 | 2,233E-08  |
| TcCLB.511599.30  | 90 kDa surface protein, putative                              | -1,905 | 0,00009808 |
| TcCLB.510017.50  | surface protease GP63 (pseudogene), putative                  | -1,907 | 2,583E-10  |
| TcCLB.506245.190 | trans-sialidase, Group V, putative                            | -1,908 | 2,466E-25  |
| TcCLB.504239.150 | hypothetical protein                                          | -1,909 | 0,0009574  |
| TcCLB.507295.30  | mucin TcMUCII, putative                                       | -1,91  | 4,818E-27  |
| TcCLB.510551.20  | trans-sialidase (pseudogene), putative                        | -1,91  | 4,073E-26  |
| TcCLB.507185.40  | trans-sialidase (pseudogene), putative                        | -1,91  | 1,101E-22  |

|                  |                                                         |        |            |
|------------------|---------------------------------------------------------|--------|------------|
| TcCLB.503403.20  | trans-sialidase, Group II, putative                     | -1,911 | 3,676E-24  |
| TcCLB.506245.60  | trans-sialidase, Group V, putative                      | -1,911 | 5,079E-12  |
| TcCLB.504689.20  | mucin-associated surface protein (MASP, pseudogene), pu | -1,912 | 6,501E-36  |
| TcCLB.507023.100 | hypothetical protein                                    | -1,914 | 9,901E-50  |
| TcCLB.509843.20  | trans-sialidase, Group VII, putative                    | -1,915 | 1,294E-92  |
| TcCLB.511599.80  | trans-sialidase, Group V, putative                      | -1,915 | 4,561E-33  |
| TcCLB.503875.30  | mucin-associated surface protein (MASP), putative       | -1,916 | 3,722E-35  |
| TcCLB.510921.20  | mucin TcMUCII, putative                                 | -1,916 | 1,032E-23  |
| TcCLB.404711.10  | trans-sialidase (pseudogene), putative                  | -1,917 | 2,673E-70  |
| TcCLB.508341.10  | mucin-associated surface protein (MASP), putative       | -1,917 | 1,725E-07  |
| TcCLB.509575.4   | trans-sialidase, putative (fragment)                    | -1,918 | 1,343E-17  |
| TcCLB.508313.14  | trans-sialidase, putative                               | -1,919 | 6,663E-14  |
| TcCLB.506801.40  | mucin-associated surface protein (MASP), putative       | -1,92  | 5,741E-44  |
| TcCLB.510329.290 | diacylglycerol kinase-like protein, putative            | -1,92  | 1,654E-42  |
| TcCLB.510553.30  | mucin-associated surface protein (MASP), putative       | -1,92  | 4,391E-23  |
| TcCLB.504249.111 | mucin-associated surface protein (MASP), putative       | -1,92  | 2,597E-19  |
| TcCLB.445783.10  | mucin-associated surface protein (MASP, pseudogene), pu | -1,92  | 4,313E-15  |
| TcCLB.510279.310 | mucin-associated surface protein (MASP), putative       | -1,921 | 1,277E-20  |
| TcCLB.508109.10  | mucin-associated surface protein (MASP), putative       | -1,921 | 7,361E-10  |
| TcCLB.506035.4   | trans-sialidase, putative (fragment)                    | -1,923 | 3,082E-36  |
| TcCLB.508221.894 | mucin-associated surface protein (MASP), putative       | -1,923 | 1,303E-13  |
| TcCLB.509663.69  | trans-sialidase, putative (fragment)                    | -1,923 | 0,01538    |
| TcCLB.410269.10  | trans-sialidase, putative (fragment)                    | -1,924 | 3,372E-17  |
| TcCLB.507297.30  | metacaspase, putative                                   | -1,925 | 1,837E-68  |
| TcCLB.508221.260 | 90 kDa surface protein, putative                        | -1,925 | 3,322E-12  |
| TcCLB.506909.150 | mucin TcMUCII (pseudogene), putative                    | -1,925 | 4,676E-06  |
| TcCLB.508151.5   | mucin-associated surface protein (MASP, pseudogene), pu | -1,925 | 0,00001712 |
| TcCLB.508165.150 | mucin-associated surface protein (MASP), putative       | -1,926 | 1,028E-23  |
| TcCLB.504787.80  | mucin TcMUCII, putative                                 | -1,927 | 1,511E-22  |
| TcCLB.509569.30  | hypothetical protein, conserved                         | -1,928 | 9,478E-83  |
| TcCLB.511173.100 | mucin-associated surface protein (MASP), putative       | -1,928 | 6,777E-32  |
| TcCLB.508011.120 | trans-sialidase (pseudogene), putative                  | -1,929 | 2,642E-20  |
| TcCLB.507071.220 | mucin-associated surface protein (MASP, pseudogene), pu | -1,933 | 2,711E-13  |
| TcCLB.503899.90  | asparagine synthetase a, putative                       | -1,934 | 1,302E-37  |
| TcCLB.506331.120 | trans-sialidase (pseudogene), putative                  | -1,937 | 7,631E-37  |
| TcCLB.508219.110 | mucin-associated surface protein (MASP), putative       | -1,937 | 2,756E-17  |
| TcCLB.503773.24  | hypothetical protein, conserved                         | -1,938 | 7,218E-25  |
| TcCLB.508753.40  | mucin-associated surface protein (MASP, pseudogene), pu | -1,94  | 1,224E-37  |
| TcCLB.510417.20  | mucin-associated surface protein (MASP, pseudogene), pu | -1,94  | 1,997E-24  |
| TcCLB.509765.129 | trans-sialidase, putative (fragment)                    | -1,941 | 6,139E-62  |
| TcCLB.430895.10  | hypothetical protein, conserved                         | -1,945 | 2,411E-32  |
| TcCLB.510205.80  | mucin-associated surface protein (MASP), putative       | -1,946 | 3,348E-19  |
| TcCLB.507163.75  | hypothetical protein                                    | -1,946 | 1,077E-08  |
| TcCLB.506799.50  | mucin-associated surface protein (MASP), putative       | -1,948 | 1,257E-62  |
| TcCLB.508761.70  | mucin-associated surface protein (MASP), putative       | -1,948 | 1,239E-40  |

|                   |                                                               |        |            |
|-------------------|---------------------------------------------------------------|--------|------------|
| TcCLB.508121.130  | mucin-associated surface protein (MASP, pseudogene), putative | -1,948 | 1,547E-24  |
| TcCLB.508045.120  | trans-sialidase, Group III, putative                          | -1,949 | 8,622E-96  |
| TcCLB.510361.80   | trans-sialidase, Group V, putative                            | -1,949 | 3,981E-21  |
| TcCLB.510359.600  | mucin-associated surface protein (MASP), putative             | -1,95  | 7,127E-22  |
| TcCLB.510583.10   | mucin TcMUCII, putative                                       | -1,951 | 8,437E-13  |
| TcCLB.506939.200  | trans-sialidase (pseudogene), putative                        | -1,952 | 1,849E-19  |
| TcCLB.510351.120  | Nudix hydrolase 2, putative (Nudix2)                          | -1,954 | 4,428E-63  |
| TcCLB.506965.10   | mucin TcMUCII, putative                                       | -1,954 | 3,696E-13  |
| TcCLB.508221.490  | mucin-associated surface protein (MASP), putative             | -1,955 | 1,689E-06  |
| TcCLB.508745.70   | mucin-associated surface protein (MASP), putative (fragment)  | -1,956 | 0,0001276  |
| TcCLB.506995.70   | mucin-associated surface protein (MASP), putative             | -1,957 | 3,66E-28   |
| TcCLB.510071.30   | UDP-Gal or UDP-GlcNAc-dependent glycosyltransferase, putative | -1,958 | 7,818E-30  |
| TcCLB.506597.51   | hypothetical protein                                          | -1,959 | 1,345E-06  |
| TcCLB.506613.60   | mucin TcMUCII (pseudogene), putative                          | -1,96  | 9,925E-13  |
| TcCLB.504201.30   | trans-sialidase, Group V, putative                            | -1,962 | 1,243E-19  |
| TcCLB.508515.150  | trans-sialidase, Group VIII, putative                         | -1,963 | 9,364E-32  |
| TcCLB.510465.125  | trans-sialidase (pseudogene), putative                        | -1,963 | 0,00009763 |
| TcCLB.510359.380  | mucin-associated surface protein (MASP), putative             | -1,965 | 6,294E-15  |
| TcCLB.504491.20   | trans-sialidase, putative                                     | -1,966 | 9,798E-16  |
| TcCLB.506501.329  | mucin-associated surface protein (MASP, pseudogene), putative | -1,966 | 3,936E-10  |
| TcCLB.506773.10   | hypothetical protein, conserved                               | -1,966 | 0,00000845 |
| TcCLB.509663.37   | hypothetical protein, conserved                               | -1,972 | 2,8E-56    |
| TcCLB.508113.20   | trans-sialidase (pseudogene), putative                        | -1,972 | 2,181E-47  |
| TcCLB.506967.40   | mucin TcMUCII, putative                                       | -1,973 | 1,886E-12  |
| TcCLB.503625.10   | asparagine synthetase a, putative                             | -1,977 | 7,898E-67  |
| TcCLB.418613.20   | mucin-associated surface protein (MASP), putative (fragment)  | -1,977 | 1,731E-08  |
| TcCLB.509479.10   | mucin TcMUCII, putative                                       | -1,978 | 1,323E-23  |
| TcCLB.506741.140  | mucin-associated surface protein (MASP), putative             | -1,978 | 1,335E-18  |
| TcCLB.506661.40   | hypothetical protein, conserved                               | -1,979 | 2,269E-47  |
| TcCLB.511255.490  | trans-sialidase (pseudogene), putative                        | -1,979 | 5,088E-11  |
| TcCLB.506971.70   | mucin TcMUCII, putative                                       | -1,979 | 2,48E-07   |
| TcCLB.510061.20   | hypothetical protein                                          | -1,979 | 0,00004909 |
| TcCLB.504277.11   | surface protein TolT, putative                                | -1,98  | 3,866E-51  |
| TcCLB.507497.11   | trans-sialidase, putative (fragment)                          | -1,98  | 1,124E-26  |
| TcCLB.507867.10   | mucin-associated surface protein (MASP), putative             | -1,982 | 0,00001951 |
| TcCLB.511149.70   | mucin TcMUCII, putative                                       | -1,984 | 3,727E-19  |
| TcCLB.422207.10   | UDP-Gal or UDP-GlcNAc-dependent glycosyltransferase, putative | -1,985 | 0,0002842  |
| TcCLB.508165.420  | mucin-associated surface protein (MASP), putative             | -1,986 | 6,077E-40  |
| TcCLB.507065.127  | mucin-associated surface protein (MASP, pseudogene), putative | -1,987 | 4,624E-27  |
| TcCLB.503827.5    | mucin-associated surface protein (MASP), putative             | -1,987 | 4,275E-06  |
| TcCLB.511725.40   | hypothetical protein, conserved                               | -1,988 | 6,901E-52  |
| TcCLB.508153.1130 | hypothetical protein                                          | -1,988 | 1,057E-20  |
| TcCLB.507067.50   | mucin TcMUCII (pseudogene), putative                          | -1,989 | 3,631E-11  |
| TcCLB.508221.820  | mucin-associated surface protein (MASP), putative             | -1,991 | 2,259E-21  |
| TcCLB.506599.189  | mucin TcMUCII, putative                                       | -1,992 | 1,311E-17  |

|                  |                                                        |        |            |
|------------------|--------------------------------------------------------|--------|------------|
| TcCLB.508495.170 | mucin TcMUCII, putative                                | -1,993 | 8,085E-29  |
| TcCLB.511603.80  | mucin-associated surface protein (MASP), putative      | -1,996 | 1,415E-21  |
| TcCLB.507069.40  | trans-sialidase, Group VI, putative                    | -1,997 | 2,874E-21  |
| TcCLB.509755.70  | mucin TcMUCII, putative                                | -1,998 | 6,469E-07  |
| TcCLB.510377.340 | hypothetical protein                                   | -1,998 | 0,00002125 |
| TcCLB.508305.40  | trans-sialidase, Group V, putative                     | -1,999 | 2,61E-24   |
| TcCLB.510959.30  | mucin-associated surface protein (MASP), putative      | -2     | 2,658E-25  |
| TcCLB.510307.284 | trans-sialidase, Group IV, putative                    | -2,001 | 1,384E-89  |
| TcCLB.511431.10  | protein kinase, putative                               | -2,003 | 3,794E-36  |
| TcCLB.510013.120 | surface protease GP63, putative                        | -2,004 | 0,00001569 |
| TcCLB.511645.10  | mucin-associated surface protein (MASP), putative      | -2,005 | 1,063E-35  |
| TcCLB.408547.5   | mucin TcMUCII, putative                                | -2,006 | 2,526E-11  |
| TcCLB.506281.20  | mucin TcMUCI, putative                                 | -2,006 | 6,116E-10  |
| TcCLB.510207.30  | trans-sialidase, Group V, putative                     | -2,009 | 6,781E-21  |
| TcCLB.504779.10  | UDP-Gal or UDP-GlcNAc-dependent glycosyltransferase, p | -2,009 | 1,223E-18  |
| TcCLB.508669.21  | hypothetical protein                                   | -2,01  | 1,658E-13  |
| TcCLB.504201.40  | mucin-associated surface protein (MASP), putative      | -2,012 | 2,019E-24  |
| TcCLB.511603.470 | 90 kDa surface protein, putative                       | -2,013 | 3,978E-34  |
| TcCLB.507801.240 | mucin-associated surface protein (MASP, pseudogene), p | -2,013 | 2,163E-27  |
| TcCLB.508873.60  | trans-sialidase, Group V, putative                     | -2,013 | 1,34E-12   |
| TcCLB.508109.30  | mucin-associated surface protein (MASP), putative      | -2,013 | 2,367E-09  |
| TcCLB.508667.40  | hypothetical protein, conserved                        | -2,016 | 1,017E-114 |
| TcCLB.506703.50  | mucin-associated surface protein (MASP), putative      | -2,016 | 1,378E-29  |
| TcCLB.503717.80  | mucin-associated surface protein (MASP, pseudogene), p | -2,017 | 3,101E-16  |
| TcCLB.511081.41  | mucin-associated surface protein (MASP, pseudogene), p | -2,017 | 1,108E-14  |
| TcCLB.508253.20  | trans-sialidase (pseudogene), putative                 | -2,018 | 1,347E-12  |
| TcCLB.503717.20  | mucin-associated surface protein (MASP), putative      | -2,019 | 1,12E-38   |
| TcCLB.511173.360 | mucin-associated surface protein (MASP), putative      | -2,019 | 4,604E-24  |
| TcCLB.504039.250 | surface protease GP63 (pseudogene), putative           | -2,02  | 4,355E-21  |
| TcCLB.509197.30  | cation transporter, putative                           | -2,021 | 2,53E-49   |
| TcCLB.509137.20  | hypothetical protein                                   | -2,024 | 5,148E-72  |
| TcCLB.508149.60  | trans-sialidase (pseudogene), putative                 | -2,024 | 1,083E-15  |
| TcCLB.508125.140 | mucin-associated surface protein (MASP), putative      | -2,025 | 2,763E-22  |
| TcCLB.506267.90  | mucin-associated surface protein (MASP), putative      | -2,027 | 1,675E-34  |
| TcCLB.508435.40  | mucin-associated surface protein (MASP, pseudogene), p | -2,027 | 1,108E-17  |
| TcCLB.510013.110 | mucin TcMUCII, putative                                | -2,027 | 4,284E-06  |
| TcCLB.508153.210 | hypothetical protein, conserved                        | -2,028 | 2,469E-50  |
| TcCLB.508173.30  | trans-sialidase (pseudogene), putative                 | -2,029 | 4,545E-47  |
| TcCLB.506821.60  | mucin TcMUCI, putative                                 | -2,029 | 3,226E-36  |
| TcCLB.511437.10  | surface protease GP63, putative                        | -2,029 | 3,105E-34  |
| TcCLB.508979.30  | mucin TcMUCII, putative                                | -2,029 | 7,619E-23  |
| TcCLB.507747.110 | mucin TcMUCII, putative                                | -2,03  | 7,009E-20  |
| TcCLB.508873.289 | 90 kDa surface protein, putative                       | -2,031 | 6,082E-10  |
| TcCLB.503501.30  | surface protease GP63 (pseudogene), putative           | -2,031 | 7,393E-09  |
| TcCLB.509835.30  | hypothetical protein, conserved                        | -2,034 | 1,778E-75  |

|                  |                                                            |        |            |
|------------------|------------------------------------------------------------|--------|------------|
| TcCLB.510693.200 | mucin TcMUCII, putative                                    | -2,034 | 1,31E-11   |
| TcCLB.506955.150 | mucin-associated surface protein (MASP), putative          | -2,036 | 3,95E-27   |
| TcCLB.510085.50  | trans-sialidase (pseudogene), putative                     | -2,036 | 8,171E-20  |
| TcCLB.510033.14  | mucin-associated surface protein (MASP, pseudogene), pu    | -2,037 | 3,988E-85  |
| TcCLB.509525.270 | mucin TcMUCII, putative                                    | -2,037 | 0,00001781 |
| TcCLB.510155.220 | trans-sialidase (pseudogene), putative                     | -2,038 | 4,766E-30  |
| TcCLB.507067.40  | mucin TcMUCII, putative                                    | -2,038 | 1,459E-18  |
| TcCLB.510483.224 | mucin TcMUCII (pseudogene), putative                       | -2,039 | 4,19E-14   |
| TcCLB.511863.10  | mucin-associated surface protein (MASP), putative          | -2,042 | 3,426E-19  |
| TcCLB.508433.145 | mucin TcMUCII (pseudogene), putative                       | -2,043 | 2,876E-07  |
| TcCLB.511557.50  | Present in the outer mitochondrial membrane proteome 1     | -2,044 | 7,891E-48  |
| TcCLB.506243.110 | expression site-associated gene (ESAG-like) protein, putat | -2,044 | 2,631E-19  |
| TcCLB.511311.20  | trans-sialidase, Group II, putative                        | -2,045 | 5,937E-22  |
| TcCLB.506067.100 | mucin TcMUCII, putative                                    | -2,047 | 0,00005156 |
| TcCLB.506335.50  | mucin-associated surface protein (MASP), putative          | -2,048 | 7,587E-33  |
| TcCLB.510115.30  | trans-sialidase, Group VI, putative                        | -2,049 | 7,726E-37  |
| TcCLB.508799.200 | hypothetical protein, conserved                            | -2,05  | 3,473E-34  |
| TcCLB.503977.70  | mucin-associated surface protein (MASP, pseudogene), pu    | -2,051 | 1,387E-23  |
| TcCLB.506967.150 | trans-sialidase (pseudogene), putative                     | -2,052 | 5,552E-20  |
| TcCLB.508229.60  | trans-sialidase, Group VII, putative                       | -2,052 | 1,647E-07  |
| TcCLB.506753.249 | hypothetical protein, conserved                            | -2,055 | 7,581E-10  |
| TcCLB.503741.40  | mucin TcMUCII, putative                                    | -2,056 | 2,512E-12  |
| TcCLB.509387.10  | trans-sialidase, Group VIII, putative                      | -2,058 | 2,653E-61  |
| TcCLB.509525.40  | hypothetical protein, conserved                            | -2,058 | 0,00007647 |
| TcCLB.509525.230 | mucin-associated surface protein (MASP), putative          | -2,06  | 1,08E-22   |
| TcCLB.503939.4   | hypothetical protein, conserved                            | -2,061 | 1,137E-11  |
| TcCLB.510375.40  | mucin-associated surface protein (MASP), putative          | -2,061 | 3,236E-09  |
| TcCLB.507071.190 | trans-sialidase, Group V, putative                         | -2,064 | 1,634E-24  |
| TcCLB.506753.15  | dispersed gene family protein 1 (DGF-1, pseudogene), put   | -2,064 | 0,00007488 |
| TcCLB.509037.20  | surface protease GP63, putative                            | -2,065 | 3,019E-33  |
| TcCLB.510279.40  | 90 kDa surface protein, putative                           | -2,066 | 2,296E-15  |
| TcCLB.508789.80  | mucin-associated surface protein (MASP), putative          | -2,066 | 8,75E-13   |
| TcCLB.507601.40  | Nudix hydrolase 2, putative (Nudix2)                       | -2,067 | 1,935E-70  |
| TcCLB.506279.74  | mucin-associated surface protein (MASP, pseudogene), pu    | -2,067 | 1,446E-15  |
| TcCLB.506599.270 | mucin TcMUCII, putative                                    | -2,067 | 2,53E-10   |
| TcCLB.507561.10  | trans-sialidase, putative                                  | -2,068 | 1,705E-10  |
| TcCLB.510583.209 | mucin-associated surface protein (MASP, pseudogene), pu    | -2,068 | 0,00002229 |
| TcCLB.481211.30  | mucin TcMUCII, putative                                    | -2,069 | 1,852E-46  |
| TcCLB.509959.60  | trans-sialidase (pseudogene), putative                     | -2,069 | 1,004E-10  |
| TcCLB.508173.40  | mercaptopyruvate sulfurtransferase, putative (MST)         | -2,07  | 1,045E-99  |
| TcCLB.506759.20  | mucin-associated surface protein (MASP), putative          | -2,07  | 1,799E-22  |
| TcCLB.509699.110 | mucin-associated surface protein (MASP), putative          | -2,072 | 3,824E-27  |
| TcCLB.508809.50  | hypothetical protein                                       | -2,073 | 1,061E-34  |
| TcCLB.511603.30  | mucin-associated surface protein (MASP), putative          | -2,075 | 3,119E-16  |
| TcCLB.508261.60  | mucin TcMUCII, putative                                    | -2,075 | 4,616E-13  |



|                  |                                                          |        |            |
|------------------|----------------------------------------------------------|--------|------------|
| TcCLB.506501.300 | hypothetical protein                                     | -2,076 | 2,183E-06  |
| TcCLB.511153.84  | hypothetical protein, conserved                          | -2,078 | 5,401E-88  |
| TcCLB.507869.20  | trans-sialidase (pseudogene), putative                   | -2,081 | 8,022E-92  |
| TcCLB.511399.50  | mucin-associated surface protein (MASP), putative        | -2,081 | 8,179E-28  |
| TcCLB.507699.180 | mucin-associated surface protein (MASP, pseudogene), pi  | -2,081 | 8,948E-23  |
| TcCLB.506245.270 | mucin-associated surface protein (MASP), putative        | -2,081 | 5,48E-20   |
| TcCLB.506499.70  | mucin TcMUCII, putative                                  | -2,082 | 5,758E-20  |
| TcCLB.509525.360 | mucin-associated surface protein (MASP, pseudogene), pi  | -2,082 | 7,869E-18  |
| TcCLB.507987.30  | mucin-associated surface protein (MASP), putative (fragm | -2,082 | 5,377E-16  |
| TcCLB.507955.20  | mucin-associated surface protein (MASP), putative        | -2,082 | 9,191E-11  |
| TcCLB.507699.130 | mucin-associated surface protein (MASP), putative        | -2,083 | 1,431E-37  |
| TcCLB.507085.10  | mucin TcMUCII, putative                                  | -2,084 | 4,738E-34  |
| TcCLB.509753.210 | mucin-associated surface protein (MASP), putative        | -2,084 | 1,42E-31   |
| TcCLB.506759.190 | surface protease GP63 (pseudogene), putative             | -2,084 | 3,492E-09  |
| TcCLB.511213.15  | mucin-associated surface protein (MASP), putative        | -2,085 | 5,211E-25  |
| TcCLB.511603.304 | mucin TcMUCII, putative                                  | -2,085 | 6,073E-14  |
| TcCLB.509753.70  | mucin-associated surface protein (MASP), putative        | -2,085 | 2,316E-13  |
| TcCLB.506321.110 | mucin TcMUCII, putative                                  | -2,086 | 4,178E-47  |
| TcCLB.509699.150 | mucin TcMUCII, putative                                  | -2,087 | 2,371E-06  |
| TcCLB.506377.10  | trans-sialidase, putative                                | -2,088 | 3,101E-78  |
| TcCLB.510979.60  | mucin TcMUCII, putative                                  | -2,088 | 1,487E-19  |
| TcCLB.507905.39  | mucin-associated surface protein (MASP), putative        | -2,09  | 1,049E-142 |
| TcCLB.504261.40  | mucin-associated surface protein (MASP), putative        | -2,09  | 8,495E-17  |
| TcCLB.508873.160 | mucin-associated surface protein (MASP), putative        | -2,091 | 6,762E-08  |
| TcCLB.508289.70  | mucin-associated surface protein (MASP, pseudogene), pi  | -2,092 | 1,107E-15  |
| TcCLB.511173.370 | trans-sialidase, Group VI, putative                      | -2,093 | 7,674E-18  |
| TcCLB.511259.50  | trans-sialidase (pseudogene), putative                   | -2,094 | 4,918E-39  |
| TcCLB.510803.15  | mucin-associated surface protein (MASP, pseudogene), pi  | -2,094 | 0,00003461 |
| TcCLB.506611.40  | mucin-associated surface protein (MASP), putative        | -2,095 | 2,016E-40  |
| TcCLB.509085.50  | trans-sialidase (pseudogene), putative                   | -2,095 | 2,738E-34  |
| TcCLB.511077.90  | mucin TcMUCII, putative                                  | -2,095 | 1,164E-18  |
| TcCLB.510329.20  | hypothetical protein, conserved                          | -2,096 | 3,394E-79  |
| TcCLB.509897.124 | mucin-associated surface protein (MASP, pseudogene), pi  | -2,097 | 1,004E-34  |
| TcCLB.506755.270 | hypothetical protein, conserved                          | -2,097 | 1,894E-11  |
| TcCLB.507071.240 | mucin-associated surface protein (MASP), putative        | -2,099 | 8,279E-19  |
| TcCLB.506173.60  | mucin-associated surface protein (MASP), putative        | -2,1   | 1,687E-28  |
| TcCLB.506067.70  | mucin-associated surface protein (MASP), putative        | -2,102 | 4,852E-11  |
| TcCLB.508221.104 | mucin-associated surface protein (MASP), putative        | -2,102 | 0,0001764  |
| TcCLB.503849.40  | mucin-associated surface protein (MASP), putative        | -2,106 | 6,179E-35  |
| TcCLB.508165.290 | mucin TcMUCII, putative                                  | -2,107 | 1,756E-08  |
| TcCLB.506965.140 | mucin-associated surface protein (MASP), putative        | -2,108 | 1,096E-34  |
| TcCLB.508297.7   | trans-sialidase, putative (fragment)                     | -2,108 | 5,769E-33  |
| TcCLB.509527.80  | mucin-associated surface protein (MASP), putative        | -2,108 | 8,527E-28  |
| TcCLB.509553.10  | hypothetical protein, conserved                          | -2,109 | 2,932E-36  |
| TcCLB.504155.230 | mucin-associated surface protein (MASP), putative        | -2,109 | 2,345E-18  |

|                  |                                                          |        |            |
|------------------|----------------------------------------------------------|--------|------------|
| TcCLB.510981.20  | trans-sialidase, putative                                | -2,11  | 3,688E-52  |
| TcCLB.510487.70  | trans-sialidase (pseudogene), putative                   | -2,11  | 4,144E-27  |
| TcCLB.508763.20  | mucin TcMUCII, putative                                  | -2,113 | 1,977E-23  |
| TcCLB.503977.50  | surface protease GP63 (pseudogene), putative             | -2,113 | 9,02E-16   |
| TcCLB.508511.30  | mucin TcMUCII, putative                                  | -2,114 | 1,711E-17  |
| TcCLB.507523.10  | trans-sialidase, putative                                | -2,115 | 2,215E-30  |
| TcCLB.508399.40  | trans-sialidase (pseudogene), putative                   | -2,116 | 1,676E-78  |
| TcCLB.507071.10  | trans-sialidase, Group V, putative                       | -2,116 | 6,386E-26  |
| TcCLB.506609.70  | mucin-associated surface protein (MASP), putative        | -2,116 | 5,849E-19  |
| TcCLB.508097.40  | trans-sialidase (pseudogene), putative                   | -2,117 | 1,081E-20  |
| TcCLB.509373.39  | surface protease GP63, putative (fragment)               | -2,117 | 0,00000071 |
| TcCLB.509805.210 | hypothetical protein, conserved                          | -2,118 | 1,97E-57   |
| TcCLB.504219.40  | trans-sialidase (pseudogene), putative                   | -2,118 | 1,774E-30  |
| TcCLB.506741.90  | mucin-associated surface protein (MASP), putative        | -2,118 | 7,697E-28  |
| TcCLB.508789.100 | trans-sialidase (pseudogene), putative                   | -2,119 | 7,041E-20  |
| TcCLB.503609.24  | mucin-associated surface protein (MASP, pseudogene), pu  | -2,119 | 1,849E-19  |
| TcCLB.511859.150 | mucin-like glycoprotein, putative                        | -2,12  | 5,65E-83   |
| TcCLB.510197.210 | mucin TcMUCII, putative                                  | -2,122 | 5,077E-14  |
| TcCLB.507063.340 | mucin-associated surface protein (MASP), putative        | -2,125 | 1,118E-33  |
| TcCLB.509657.30  | mucin-associated surface protein (MASP), putative        | -2,127 | 4,011E-29  |
| TcCLB.507429.70  | mucin TcMUCII, putative                                  | -2,128 | 2,242E-63  |
| TcCLB.508435.10  | mucin-associated surface protein (MASP), putative        | -2,128 | 5,606E-18  |
| TcCLB.507237.80  | mucin-associated surface protein (MASP), putative        | -2,128 | 9,379E-11  |
| TcCLB.506267.10  | mucin-associated surface protein (MASP), putative        | -2,132 | 8,798E-09  |
| TcCLB.507295.20  | mucin-associated surface protein (MASP), putative        | -2,133 | 1,789E-34  |
| TcCLB.508747.59  | mucin-associated surface protein (MASP), putative        | -2,133 | 4,027E-28  |
| TcCLB.506335.130 | trans-sialidase, Group V, putative                       | -2,135 | 1,033E-18  |
| TcCLB.507747.180 | trans-sialidase, Group VI, putative                      | -2,137 | 2,827E-73  |
| TcCLB.507071.390 | trans-sialidase, Group V, putative                       | -2,137 | 1,614E-17  |
| TcCLB.507699.10  | mucin TcMUCII, putative                                  | -2,139 | 4,285E-23  |
| TcCLB.506939.50  | mucin-associated surface protein (MASP), putative        | -2,139 | 2,316E-07  |
| TcCLB.510363.170 | mucin TcMUCII, putative                                  | -2,14  | 7,598E-06  |
| TcCLB.508167.29  | mucin-associated surface protein (MASP), putative (fragn | -2,141 | 5,775E-18  |
| TcCLB.510071.20  | hypothetical protein                                     | -2,142 | 2,115E-10  |
| TcCLB.511167.100 | hypothetical protein, conserved                          | -2,143 | 4,902E-102 |
| TcCLB.511149.100 | mucin TcMUCII, putative                                  | -2,143 | 8,375E-40  |
| TcCLB.511603.70  | mucin TcMUCII, putative                                  | -2,143 | 6,698E-27  |
| TcCLB.504039.130 | mucin-associated surface protein (MASP), putative        | -2,144 | 5,618E-23  |
| TcCLB.508539.80  | mucin-associated surface protein (MASP), putative        | -2,145 | 2,461E-43  |
| TcCLB.509937.220 | protein kinase, putative                                 | -2,145 | 5,667E-10  |
| TcCLB.509525.94  | mucin-associated surface protein (MASP, pseudogene), pu  | -2,146 | 1,594E-32  |
| TcCLB.510983.5   | trans-sialidase (pseudogene), putative                   | -2,146 | 1,601E-26  |
| TcCLB.488591.10  | trans-sialidase, putative (fragment)                     | -2,147 | 1,515E-38  |
| TcCLB.510391.30  | mucin TcMUCII, putative                                  | -2,148 | 1,919E-20  |
| TcCLB.510363.310 | trans-sialidase (pseudogene), putative                   | -2,149 | 4,254E-17  |

|                  |                                                          |        |            |
|------------------|----------------------------------------------------------|--------|------------|
| TcCLB.510329.180 | hypothetical protein, conserved                          | -2,149 | 1,041E-16  |
| TcCLB.511077.110 | mucin-associated surface protein (MASP), putative        | -2,15  | 1,631E-14  |
| TcCLB.510373.30  | 90 kDa surface protein, putative                         | -2,151 | 1,285E-14  |
| TcCLB.504155.70  | mucin TcMUCII, putative                                  | -2,151 | 5,954E-10  |
| TcCLB.508361.30  | mucin TcMUCII, putative                                  | -2,153 | 2,102E-14  |
| TcCLB.508355.80  | trans-sialidase, Group VIII, putative                    | -2,154 | 2,847E-26  |
| TcCLB.510713.160 | trans-sialidase, Group V, putative                       | -2,154 | 1,656E-20  |
| TcCLB.507255.10  | surface protease GP63 (pseudogene), putative             | -2,154 | 6,952E-19  |
| TcCLB.506329.79  | mucin-associated surface protein (MASP, pseudogene), pi  | -2,154 | 1,783E-08  |
| TcCLB.503709.10  | hypothetical protein                                     | -2,155 | 2,224E-11  |
| TcCLB.508593.10  | trans-sialidase, Group IV, putative                      | -2,156 | 2,509E-51  |
| TcCLB.508165.210 | mucin-associated surface protein (MASP), putative        | -2,156 | 9,13E-35   |
| TcCLB.508883.30  | mucin TcMUCII, putative                                  | -2,156 | 1,271E-12  |
| TcCLB.510583.30  | mucin TcMUCII, putative                                  | -2,156 | 5,707E-06  |
| TcCLB.503447.50  | trans-sialidase, Group IV, putative                      | -2,157 | 3,643E-46  |
| TcCLB.510377.410 | mucin TcMUCII, putative                                  | -2,157 | 1,372E-14  |
| TcCLB.510483.154 | mucin-associated surface protein (MASP), putative        | -2,157 | 4,081E-14  |
| TcCLB.506083.20  | trans-sialidase (pseudogene), putative                   | -2,158 | 3,016E-64  |
| TcCLB.506321.190 | mucin TcMUCII, putative                                  | -2,158 | 8,444E-20  |
| TcCLB.507699.110 | mucin-associated surface protein (MASP, pseudogene), pi  | -2,159 | 3,235E-22  |
| TcCLB.511173.400 | mucin-associated surface protein (MASP), putative        | -2,16  | 2,699E-14  |
| TcCLB.508165.185 | mucin TcMUCII (pseudogene), putative                     | -2,161 | 0,000028   |
| TcCLB.507959.290 | hypothetical protein                                     | -2,163 | 0,0002948  |
| TcCLB.511255.280 | mucin-associated surface protein (MASP), putative        | -2,164 | 5,803E-26  |
| TcCLB.510377.500 | trans-sialidase (pseudogene), putative                   | -2,164 | 5,325E-13  |
| TcCLB.510085.10  | mucin-associated surface protein (MASP, pseudogene), pi  | -2,165 | 9,087E-22  |
| TcCLB.508365.40  | mucin-associated surface protein (MASP), putative        | -2,165 | 5,607E-11  |
| TcCLB.425855.9   | hypothetical protein, conserved (fragment)               | -2,165 | 6,193E-10  |
| TcCLB.510209.9   | trans-sialidase, putative                                | -2,166 | 2,086E-11  |
| TcCLB.506737.90  | trans-sialidase, Group V, putative                       | -2,168 | 2,327E-142 |
| TcCLB.504769.20  | mucin-associated surface protein (MASP), putative        | -2,168 | 2,932E-56  |
| TcCLB.510279.60  | mucin-associated surface protein (MASP), putative        | -2,168 | 9,444E-23  |
| TcCLB.507075.40  | mucin-associated surface protein (MASP), putative (fragm | -2,169 | 1,468E-36  |
| TcCLB.506613.20  | mucin-associated surface protein (MASP, pseudogene), pi  | -2,169 | 1,061E-23  |
| TcCLB.509657.70  | trans-sialidase (pseudogene), putative                   | -2,17  | 3,605E-13  |
| TcCLB.506067.110 | mucin-associated surface protein (MASP, pseudogene), pi  | -2,171 | 1,218E-09  |
| TcCLB.508453.10  | mucin-associated surface protein (MASP), putative        | -2,172 | 4,781E-37  |
| TcCLB.511255.690 | mucin-associated surface protein (MASP), putative        | -2,173 | 1,1E-28    |
| TcCLB.511605.90  | mucin TcMUCII, putative                                  | -2,176 | 2,929E-10  |
| TcCLB.462761.10  | surface protease GP63, putative                          | -2,177 | 4,104E-73  |
| TcCLB.509905.60  | trans-sialidase (pseudogene), putative                   | -2,178 | 5,236E-52  |
| TcCLB.511593.60  | mucin-associated surface protein (MASP), putative        | -2,178 | 1,18E-33   |
| TcCLB.508455.20  | trans-sialidase, Group V, putative                       | -2,178 | 4,998E-33  |
| TcCLB.508261.130 | mucin-associated surface protein (MASP), putative        | -2,178 | 4,163E-23  |
| TcCLB.508539.155 | mucin TcMUCII, putative                                  | -2,178 | 3,766E-18  |

|                  |                                                               |        |            |
|------------------|---------------------------------------------------------------|--------|------------|
| TcCLB.506499.90  | 90 kDa surface protein, putative                              | -2,178 | 4,416E-08  |
| TcCLB.510469.10  | mucin-associated surface protein (MASP), putative             | -2,179 | 4,447E-08  |
| TcCLB.511259.180 | mucin-associated surface protein (MASP), putative             | -2,18  | 8,083E-11  |
| TcCLB.507993.230 | hypothetical protein, conserved (pseudogene)                  | -2,18  | 0,00000346 |
| TcCLB.507429.20  | mucin-associated surface protein (MASP), putative             | -2,181 | 1,51E-59   |
| TcCLB.507611.120 | expression site-associated gene (ESAG-like) protein, putative | -2,182 | 2,874E-12  |
| TcCLB.511063.120 | mucin TcMUCII, putative                                       | -2,182 | 7,27E-08   |
| TcCLB.510803.19  | trans-sialidase, putative                                     | -2,182 | 8,843E-07  |
| TcCLB.504277.30  | hypothetical protein                                          | -2,183 | 8,118E-25  |
| TcCLB.505949.70  | mucin TcMUCII, putative                                       | -2,184 | 1,927E-28  |
| TcCLB.506501.210 | surface protease GP63 (pseudogene), putative                  | -2,184 | 2,522E-07  |
| TcCLB.511183.420 | mucin-associated surface protein (MASP, pseudogene), putative | -2,185 | 3,596E-32  |
| TcCLB.510417.40  | mucin-associated surface protein (MASP), putative (fragment)  | -2,185 | 7,223E-08  |
| TcCLB.510475.120 | mucin-associated surface protein (MASP, pseudogene), putative | -2,185 | 1,123E-06  |
| TcCLB.506309.40  | mucin-associated surface protein (MASP), putative             | -2,186 | 4,22E-11   |
| TcCLB.397923.10  | mucin-associated surface protein (MASP), putative             | -2,187 | 5,62E-29   |
| TcCLB.510451.10  | trans-sialidase (pseudogene), putative                        | -2,188 | 1,237E-08  |
| TcCLB.508165.280 | mucin-associated surface protein (MASP), putative             | -2,189 | 3,397E-20  |
| TcCLB.509525.234 | mucin TcMUCII, putative                                       | -2,189 | 5,756E-14  |
| TcCLB.506499.110 | mucin TcMUCII (pseudogene), putative                          | -2,19  | 1,082E-15  |
| TcCLB.506969.6   | trans-sialidase (pseudogene), putative                        | -2,19  | 0,00001676 |
| TcCLB.448653.10  | trans-sialidase, putative (fragment)                          | -2,191 | 9,551E-06  |
| TcCLB.509525.20  | trans-sialidase (pseudogene), putative                        | -2,192 | 7,837E-39  |
| TcCLB.507973.10  | mucin TcMUCI, putative                                        | -2,192 | 2,565E-16  |
| TcCLB.509899.50  | mucin-associated surface protein (MASP, pseudogene), putative | -2,195 | 1,184E-46  |
| TcCLB.508605.20  | UDP-Gal or UDP-GlcNAc-dependent glycosyltransferase, putative | -2,195 | 9,204E-37  |
| TcCLB.509657.40  | mucin TcMUCII, putative                                       | -2,196 | 2,664E-30  |
| TcCLB.510497.60  | mucin TcMUCII, putative                                       | -2,196 | 3,116E-17  |
| TcCLB.504393.20  | hypothetical protein                                          | -2,196 | 0,0002077  |
| TcCLB.510013.150 | mucin-associated surface protein (MASP, pseudogene), putative | -2,198 | 5,242E-28  |
| TcCLB.510631.20  | trans-sialidase (pseudogene), putative                        | -2,199 | 1,14E-95   |
| TcCLB.510715.20  | trans-sialidase, Group V, putative                            | -2,199 | 1,099E-34  |
| TcCLB.506763.234 | mucin-associated surface protein (MASP, pseudogene), putative | -2,199 | 1,047E-20  |
| TcCLB.508011.90  | trans-sialidase (pseudogene), putative                        | -2,201 | 1,665E-33  |
| TcCLB.503973.120 | mucin-associated surface protein (MASP), putative             | -2,202 | 9,813E-33  |
| TcCLB.510503.20  | mucin TcMUCII, putative                                       | -2,202 | 1,367E-21  |
| TcCLB.507069.160 | trans-sialidase, Group V, putative                            | -2,203 | 1,674E-30  |
| TcCLB.510017.40  | mucin TcMUCII, putative                                       | -2,205 | 5,341E-13  |
| TcCLB.511859.90  | hypothetical protein                                          | -2,206 | 1,166E-51  |
| TcCLB.509905.180 | mucin-associated surface protein (MASP), putative             | -2,206 | 1,118E-35  |
| TcCLB.511625.90  | mucin-associated surface protein (MASP), putative             | -2,207 | 1,416E-33  |
| TcCLB.508511.15  | trans-sialidase (pseudogene), putative                        | -2,208 | 1,958E-06  |
| TcCLB.511173.180 | mucin-associated surface protein (MASP), putative             | -2,209 | 1,268E-23  |
| TcCLB.508741.130 | hypothetical protein                                          | -2,21  | 2,743E-110 |
| TcCLB.509897.30  | mucin-associated surface protein (MASP, pseudogene), putative | -2,21  | 3,801E-23  |

|                  |                                                         |        |            |
|------------------|---------------------------------------------------------|--------|------------|
| TcCLB.507237.24  | mucin TcMUCII (pseudogene), putative                    | -2,21  | 0,00007609 |
| TcCLB.508221.550 | mucin-associated surface protein (MASP), putative       | -2,214 | 8,465E-14  |
| TcCLB.506277.3   | mucin TcMUCII, putative (fragment)                      | -2,214 | 4,523E-12  |
| TcCLB.510201.10  | trans-sialidase, Group V, putative                      | -2,215 | 2,844E-37  |
| TcCLB.509035.20  | surface protease GP63, putative                         | -2,215 | 1,152E-20  |
| TcCLB.511373.30  | mucin-associated surface protein (MASP), putative       | -2,215 | 1,666E-09  |
| TcCLB.506229.20  | hypothetical protein, conserved                         | -2,216 | 2,508E-34  |
| TcCLB.509081.130 | surface protease GP63 (pseudogene), putative            | -2,216 | 3,897E-08  |
| TcCLB.506769.60  | mucin-associated surface protein (MASP, pseudogene), pi | -2,218 | 3,117E-17  |
| TcCLB.511277.370 | phosphatidic acid phosphatase, putative                 | -2,219 | 5,144E-74  |
| TcCLB.506137.60  | mucin-associated surface protein (MASP), putative       | -2,219 | 3,983E-08  |
| TcCLB.506335.150 | mucin-associated surface protein (MASP, pseudogene), pi | -2,22  | 7,348E-29  |
| TcCLB.401183.10  | trans-sialidase, putative (fragment)                    | -2,22  | 3,409E-21  |
| TcCLB.511553.5   | trans-sialidase (pseudogene), putative                  | -2,22  | 1,584E-09  |
| TcCLB.503761.20  | surface protease GP63 (pseudogene), putative            | -2,221 | 4,297E-26  |
| TcCLB.510961.40  | mucin TcMUCII, putative                                 | -2,223 | 5,413E-21  |
| TcCLB.511173.460 | mucin-associated surface protein (MASP), putative       | -2,223 | 1,436E-19  |
| TcCLB.506501.40  | mucin TcMUCII, putative                                 | -2,227 | 5,967E-30  |
| TcCLB.511921.90  | mucin-associated surface protein (MASP, pseudogene), pi | -2,227 | 2,036E-26  |
| TcCLB.506267.30  | mucin TcMUCII, putative                                 | -2,227 | 6,424E-24  |
| TcCLB.506453.30  | mucin-associated surface protein (MASP), putative       | -2,227 | 2,513E-20  |
| TcCLB.508433.120 | mucin-associated surface protein (MASP, pseudogene), pi | -2,227 | 3,011E-16  |
| TcCLB.506355.20  | receptor-type adenylate cyclase, putative               | -2,228 | 6,904E-54  |
| TcCLB.507699.90  | mucin TcMUCII, putative                                 | -2,228 | 2,442E-42  |
| TcCLB.510501.40  | trans-sialidase, putative                               | -2,228 | 2,748E-11  |
| TcCLB.506613.40  | trans-sialidase, Group V, putative                      | -2,23  | 1,939E-42  |
| TcCLB.507071.100 | mucin-associated surface protein (MASP), putative       | -2,23  | 1,001E-20  |
| TcCLB.511625.100 | mucin TcMUCII, putative                                 | -2,23  | 2,261E-20  |
| TcCLB.506131.140 | mucin-associated surface protein (MASP), putative       | -2,23  | 1,749E-18  |
| TcCLB.510503.40  | surface protease GP63 (pseudogene), putative            | -2,23  | 3,094E-14  |
| TcCLB.508221.518 | mucin TcMUCII, putative                                 | -2,23  | 9,932E-13  |
| TcCLB.511089.19  | mucin-associated surface protein (MASP), putative       | -2,23  | 7,011E-12  |
| TcCLB.506611.10  | mucin-associated surface protein (MASP), putative       | -2,231 | 5,529E-17  |
| TcCLB.508871.60  | mucin-associated surface protein (MASP), putative       | -2,232 | 1,34E-17   |
| TcCLB.510025.150 | mucin TcMUCII, putative                                 | -2,232 | 1,02E-14   |
| TcCLB.510817.50  | trans-sialidase, Group II, putative                     | -2,234 | 3,027E-59  |
| TcCLB.503773.30  | hypothetical protein, conserved                         | -2,234 | 3,804E-33  |
| TcCLB.506131.170 | trans-sialidase, Group V, putative                      | -2,234 | 5,261E-17  |
| TcCLB.509031.20  | trans-sialidase, putative (fragment)                    | -2,237 | 6,738E-21  |
| TcCLB.506279.60  | trans-sialidase, Group VI, putative                     | -2,239 | 4,691E-61  |
| TcCLB.507143.90  | hypothetical protein                                    | -2,242 | 0,0003553  |
| TcCLB.509897.80  | mucin-associated surface protein (MASP, pseudogene), pi | -2,245 | 3,617E-16  |
| TcCLB.510591.10  | trans-sialidase (pseudogene), putative                  | -2,248 | 1,302E-12  |
| TcCLB.511087.10  | mucin-associated surface protein (MASP, pseudogene), pi | -2,249 | 3,128E-28  |
| TcCLB.510275.50  | mucin TcMUCII, putative                                 | -2,25  | 6,774E-22  |

|                  |                                                          |        |           |
|------------------|----------------------------------------------------------|--------|-----------|
| TcCLB.444331.10  | mucin-associated surface protein (MASP), putative        | -2,253 | 4,131E-11 |
| TcCLB.506835.90  | hypothetical protein, conserved                          | -2,254 | 2,16E-136 |
| TcCLB.508099.20  | serine-alanine-and proline-rich protein, putative        | -2,255 | 3,76E-35  |
| TcCLB.509433.10  | hypothetical protein                                     | -2,255 | 1,567E-19 |
| TcCLB.508593.20  | trans-sialidase, Group IV, putative                      | -2,256 | 5,853E-53 |
| TcCLB.509947.10  | mucin TcMUCII, putative                                  | -2,258 | 2,828E-43 |
| TcCLB.508163.320 | mucin-associated surface protein (MASP), putative        | -2,259 | 3,787E-23 |
| TcCLB.511921.29  | mucin-associated surface protein (MASP, pseudogene), pi  | -2,259 | 1,908E-16 |
| TcCLB.509615.50  | hypothetical protein                                     | -2,261 | 0,001588  |
| TcCLB.511043.60  | receptor-type adenylate cyclase, putative                | -2,262 | 3,081E-69 |
| TcCLB.509811.9   | surface protease GP63, putative                          | -2,262 | 1,262E-38 |
| TcCLB.506741.60  | mucin-associated surface protein (MASP), putative        | -2,262 | 5,484E-23 |
| TcCLB.510017.30  | mucin-associated surface protein (MASP, pseudogene), pi  | -2,262 | 1,247E-17 |
| TcCLB.508125.80  | trans-sialidase (pseudogene), putative                   | -2,264 | 1,178E-17 |
| TcCLB.510361.30  | mucin-associated surface protein (MASP), putative        | -2,264 | 1,412E-13 |
| TcCLB.506965.20  | mucin-associated surface protein (MASP), putative        | -2,265 | 2,069E-15 |
| TcCLB.510203.34  | mucin-associated surface protein (MASP, pseudogene), pi  | -2,265 | 1,055E-10 |
| TcCLB.506133.140 | mucin-associated surface protein (MASP), putative        | -2,266 | 2,89E-25  |
| TcCLB.506501.5   | trans-sialidase (pseudogene), putative                   | -2,266 | 1,482E-11 |
| TcCLB.510377.439 | mucin TcMUCII, putative                                  | -2,267 | 2,668E-19 |
| TcCLB.508121.160 | mucin-associated surface protein (MASP, pseudogene), pi  | -2,268 | 4,339E-21 |
| TcCLB.506501.110 | mucin-associated surface protein (MASP), putative        | -2,268 | 1,363E-19 |
| TcCLB.511553.140 | mucin-associated surface protein (MASP), putative        | -2,268 | 6,602E-14 |
| TcCLB.508523.50  | trans-sialidase, Group II, putative                      | -2,269 | 1,869E-50 |
| TcCLB.503973.80  | mucin-associated surface protein (MASP), putative        | -2,27  | 8,35E-35  |
| TcCLB.507069.10  | mucin-associated surface protein (MASP), putative        | -2,27  | 3,8E-24   |
| TcCLB.511109.10  | surface protein TolT (pseudogene) (TolT)                 | -2,272 | 5,049E-29 |
| TcCLB.510681.41  | surface protease GP63, putative                          | -2,272 | 4,811E-18 |
| TcCLB.503633.11  | mucin-associated surface protein (MASP), putative (fragr | -2,272 | 5,372E-18 |
| TcCLB.504155.293 | mucin-associated surface protein (MASP), putative        | -2,272 | 1,214E-07 |
| TcCLB.511221.50  | mucin-associated surface protein (MASP), putative        | -2,273 | 1,678E-59 |
| TcCLB.506669.10  | hypothetical protein, conserved                          | -2,273 | 1,814E-56 |
| TcCLB.467373.10  | trans-sialidase, putative (fragment)                     | -2,274 | 2,181E-76 |
| TcCLB.506713.80  | trans-sialidase, putative (fragment)                     | -2,274 | 2,876E-63 |
| TcCLB.506613.50  | mucin-associated surface protein (MASP), putative        | -2,278 | 1,797E-68 |
| TcCLB.507937.20  | mucin-associated surface protein (MASP, pseudogene), pi  | -2,278 | 2,148E-22 |
| TcCLB.506601.51  | mucin TcMUCII (pseudogene), putative                     | -2,279 | 3,709E-18 |
| TcCLB.506667.30  | 90 kDa surface protein, putative                         | -2,281 | 3,377E-45 |
| TcCLB.510207.10  | mucin TcMUCII, putative                                  | -2,281 | 7,057E-18 |
| TcCLB.510363.60  | trans-sialidase (pseudogene), putative                   | -2,282 | 1,491E-28 |
| TcCLB.508501.110 | mucin TcMUCII, putative                                  | -2,282 | 5,191E-26 |
| TcCLB.507959.210 | mucin-associated surface protein (MASP), putative        | -2,282 | 3,721E-25 |
| TcCLB.510373.60  | mucin-associated surface protein (MASP), putative        | -2,284 | 3,92E-49  |
| TcCLB.510583.200 | mucin TcMUCII, putative                                  | -2,284 | 3,513E-15 |
| TcCLB.507549.20  | trans-sialidase (pseudogene), putative                   | -2,285 | 6,054E-64 |

|                  |                                                         |        |            |
|------------------|---------------------------------------------------------|--------|------------|
| TcCLB.508873.10  | mucin-associated surface protein (MASP), putative       | -2,285 | 5,53E-46   |
| TcCLB.510789.10  | mucin TcMUCII, putative                                 | -2,286 | 2,669E-36  |
| TcCLB.511605.55  | hypothetical protein                                    | -2,286 | 6,154E-23  |
| TcCLB.404431.10  | trans-sialidase, putative                               | -2,287 | 2,25E-43   |
| TcCLB.506279.30  | mucin TcMUCII, putative                                 | -2,288 | 4,011E-28  |
| TcCLB.506851.30  | hypothetical protein, conserved                         | -2,288 | 4,878E-26  |
| TcCLB.509525.240 | mucin-associated surface protein (MASP), putative       | -2,288 | 3,032E-16  |
| TcCLB.424171.10  | trans-sialidase (pseudogene), putative                  | -2,288 | 7,758E-11  |
| TcCLB.504213.50  | hypothetical protein, conserved                         | -2,291 | 2,517E-54  |
| TcCLB.511895.10  | receptor-type adenylate cyclase, putative               | -2,292 | 4,445E-64  |
| TcCLB.506789.50  | mucin-associated surface protein (MASP), putative       | -2,292 | 1,26E-24   |
| TcCLB.506667.50  | trans-sialidase (pseudogene), putative                  | -2,292 | 1,064E-17  |
| TcCLB.508221.210 | mucin-associated surface protein (MASP), putative       | -2,292 | 2,121E-13  |
| TcCLB.506285.90  | mucin TcMUCII, putative                                 | -2,295 | 4,948E-27  |
| TcCLB.510697.50  | trans-sialidase, Group VI, putative                     | -2,298 | 8,358E-26  |
| TcCLB.508221.509 | mucin-associated surface protein (MASP, pseudogene), pu | -2,298 | 2,517E-13  |
| TcCLB.511611.16  | mucin TcMUCII (pseudogene), putative                    | -2,298 | 4,039E-11  |
| TcCLB.507257.80  | diacylglycerol kinase-like protein, putative            | -2,301 | 1,144E-74  |
| TcCLB.510791.50  | mucin TcMUCII, putative                                 | -2,301 | 2,093E-38  |
| TcCLB.510475.110 | mucin TcMUCII, putative                                 | -2,301 | 1,338E-11  |
| TcCLB.508873.250 | mucin-associated surface protein (MASP), putative       | -2,302 | 3,858E-45  |
| TcCLB.505025.20  | surface protease GP63 (pseudogene), putative            | -2,302 | 2,954E-14  |
| TcCLB.503861.100 | trans-sialidase (pseudogene), putative                  | -2,303 | 8,262E-70  |
| TcCLB.508789.120 | trans-sialidase, Group VI, putative                     | -2,303 | 3,099E-29  |
| TcCLB.506211.150 | polyprenyl synthase, putative                           | -2,304 | 4,304E-90  |
| TcCLB.508219.70  | mucin-associated surface protein (MASP), putative       | -2,304 | 9,979E-21  |
| TcCLB.506945.40  | hypothetical protein, conserved                         | -2,305 | 3,126E-127 |
| TcCLB.507959.41  | mucin TcMUCII, putative                                 | -2,305 | 1,022E-10  |
| TcCLB.507859.31  | hypothetical protein                                    | -2,306 | 3,267E-22  |
| TcCLB.506769.10  | hypothetical protein                                    | -2,306 | 9,079E-12  |
| TcCLB.463323.10  | trans-sialidase, Group II, putative                     | -2,307 | 9,475E-61  |
| TcCLB.508831.220 | trans-sialidase (pseudogene), putative                  | -2,307 | 5,388E-11  |
| TcCLB.508761.160 | mucin TcMUCII, putative                                 | -2,308 | 1,786E-28  |
| TcCLB.509123.5   | trans-sialidase (pseudogene), putative                  | -2,308 | 0,00001221 |
| TcCLB.439245.10  | mucin TcMUCII, putative (fragment)                      | -2,309 | 1,794E-21  |
| TcCLB.510625.40  | trans-sialidase, Group V, putative                      | -2,309 | 2,964E-21  |
| TcCLB.505615.10  | surface protease GP63, putative                         | -2,313 | 1,074E-87  |
| TcCLB.506133.130 | trans-sialidase, Group V, putative                      | -2,315 | 1,556E-24  |
| TcCLB.506599.70  | mucin TcMUCII, putative                                 | -2,315 | 1,679E-14  |
| TcCLB.506501.270 | syntaxin binding protein (pseudogene), putative         | -2,317 | 2,254E-08  |
| TcCLB.509217.90  | mucin-associated surface protein (MASP), putative       | -2,318 | 5,881E-39  |
| TcCLB.510715.150 | trans-sialidase, Group VI, putative                     | -2,318 | 8,133E-29  |
| TcCLB.508365.200 | mucin-associated surface protein (MASP), putative       | -2,318 | 3,474E-11  |
| TcCLB.504479.10  | trans-sialidase, Group II, putative                     | -2,32  | 9,656E-82  |
| TcCLB.510629.10  | mucin-associated surface protein (MASP), putative       | -2,32  | 1,771E-09  |

|                  |                                                         |        |            |
|------------------|---------------------------------------------------------|--------|------------|
| TcCLB.506067.280 | mucin TcMUCII, putative                                 | -2,321 | 1,031E-36  |
| TcCLB.503889.10  | mucin TcMUCII, putative                                 | -2,323 | 4,072E-54  |
| TcCLB.510377.220 | mucin-associated surface protein (MASP, pseudogene), pu | -2,323 | 7,705E-23  |
| TcCLB.510047.109 | mucin TcMUCII, putative                                 | -2,325 | 9,847E-37  |
| TcCLB.506269.10  | mucin-associated surface protein (MASP), putative       | -2,327 | 5,492E-35  |
| TcCLB.511923.49  | mucin-associated surface protein (MASP, pseudogene), pu | -2,327 | 2,257E-06  |
| TcCLB.506193.60  | ascorbate peroxidase, putative (APX)                    | -2,328 | 7,092E-50  |
| TcCLB.506703.140 | mucin-associated surface protein (MASP), putative       | -2,328 | 1,398E-06  |
| TcCLB.508991.30  | trans-sialidase (pseudogene), putative                  | -2,331 | 1,014E-69  |
| TcCLB.505757.10  | hypothetical protein, conserved                         | -2,332 | 1,239E-51  |
| TcCLB.510205.20  | mucin-associated surface protein (MASP), putative       | -2,332 | 2,105E-40  |
| TcCLB.506501.10  | mucin-associated surface protein (MASP), putative       | -2,332 | 1,497E-16  |
| TcCLB.508221.600 | mucin-associated surface protein (MASP), putative       | -2,332 | 5,418E-13  |
| TcCLB.511289.80  | polyprenyl synthase, putative                           | -2,333 | 9,096E-125 |
| TcCLB.510561.30  | mucin-associated surface protein (MASP), putative       | -2,333 | 2,784E-06  |
| TcCLB.508261.70  | mucin-associated surface protein (MASP, pseudogene), pu | -2,334 | 2,112E-29  |
| TcCLB.509663.44  | hypothetical protein, conserved                         | -2,339 | 7,916E-73  |
| TcCLB.511149.130 | mucin TcMUCL, putative                                  | -2,34  | 1,335E-06  |
| TcCLB.508999.120 | trans-sialidase (pseudogene), putative                  | -2,341 | 1,076E-33  |
| TcCLB.463279.20  | trans-sialidase, Group II, putative                     | -2,342 | 3,097E-108 |
| TcCLB.507959.80  | mucin-associated surface protein (MASP), putative       | -2,342 | 4,161E-38  |
| TcCLB.509031.3   | trans-sialidase, putative (fragment)                    | -2,342 | 1,776E-25  |
| TcCLB.506499.100 | hypothetical protein                                    | -2,342 | 1,129E-07  |
| TcCLB.503771.10  | mucin-associated surface protein (MASP), putative       | -2,342 | 2,329E-06  |
| TcCLB.510919.9   | trans-sialidase, putative (fragment)                    | -2,344 | 7,75E-37   |
| TcCLB.508365.130 | mucin TcMUCII, putative                                 | -2,344 | 1,499E-15  |
| TcCLB.506329.9   | mucin-associated surface protein (MASP, pseudogene), pu | -2,344 | 1,277E-13  |
| TcCLB.510933.80  | trans-sialidase, Group V, putative                      | -2,345 | 1,814E-31  |
| TcCLB.510323.110 | hypothetical protein, conserved                         | -2,346 | 1,934E-48  |
| TcCLB.510279.140 | mucin-associated surface protein (MASP), putative       | -2,348 | 5,381E-28  |
| TcCLB.506717.100 | mucin-associated surface protein (MASP, pseudogene), pu | -2,349 | 1,109E-38  |
| TcCLB.507071.20  | mucin-associated surface protein (MASP), putative       | -2,35  | 2,008E-44  |
| TcCLB.507957.229 | mucin TcMUCII, putative                                 | -2,35  | 1,57E-30   |
| TcCLB.506613.150 | trans-sialidase (pseudogene), putative                  | -2,35  | 9,595E-23  |
| TcCLB.510561.40  | mucin TcMUCII, putative                                 | -2,352 | 9,719E-62  |
| TcCLB.509549.20  | mucin-associated surface protein (MASP), putative       | -2,352 | 4,971E-55  |
| TcCLB.511203.29  | surface protease GP63, putative (fragment)              | -2,352 | 7,069E-51  |
| TcCLB.510019.10  | mucin TcMUCII, putative                                 | -2,352 | 2,721E-20  |
| TcCLB.510929.10  | trans-sialidase, putative                               | -2,352 | 5,15E-14   |
| TcCLB.506901.60  | mucin TcMUCII, putative                                 | -2,352 | 9,206E-12  |
| TcCLB.507747.130 | trans-sialidase (pseudogene), putative                  | -2,353 | 1,242E-44  |
| TcCLB.509765.50  | trans-sialidase, Group VIII, putative                   | -2,353 | 1,162E-11  |
| TcCLB.506767.360 | mucin TcMUCII, putative                                 | -2,354 | 9,832E-28  |
| TcCLB.510021.20  | mucin-associated surface protein (MASP), putative       | -2,354 | 1,085E-26  |
| TcCLB.508365.160 | mucin-associated surface protein (MASP), putative       | -2,354 | 5,115E-25  |



|                  |                                                         |        |            |
|------------------|---------------------------------------------------------|--------|------------|
| TcCLB.510697.10  | mucin-associated surface protein (MASP), putative       | -2,354 | 7,036E-25  |
| TcCLB.510239.70  | mucin-associated surface protein (MASP), putative       | -2,355 | 3,951E-39  |
| TcCLB.507071.230 | trans-sialidase, Group V, putative                      | -2,355 | 1,341E-33  |
| TcCLB.508247.90  | trans-sialidase, Group V, putative                      | -2,356 | 9,594E-08  |
| TcCLB.507687.70  | mucin-associated surface protein (MASP), putative       | -2,357 | 8,765E-27  |
| TcCLB.510939.25  | mucin TcMUCI, putative                                  | -2,358 | 4,029E-56  |
| TcCLB.511153.19  | surface protease GP63, putative                         | -2,359 | 6,588E-120 |
| TcCLB.504155.80  | mucin-associated surface protein (MASP), putative       | -2,359 | 3,104E-19  |
| TcCLB.508435.20  | mucin TcMUCII, putative                                 | -2,359 | 5,236E-18  |
| TcCLB.504081.40  | mucin-associated surface protein (MASP), putative       | -2,36  | 1,504E-14  |
| TcCLB.511183.360 | mucin-associated surface protein (MASP), putative       | -2,361 | 8,383E-42  |
| TcCLB.506995.40  | mucin TcMUCII, putative                                 | -2,361 | 7,98E-35   |
| TcCLB.506279.120 | mucin TcMUCII, putative                                 | -2,361 | 9,9E-13    |
| TcCLB.506741.50  | mucin TcMUCII, putative                                 | -2,362 | 6,605E-57  |
| TcCLB.506767.40  | mucin-associated surface protein (MASP), putative       | -2,364 | 3,761E-44  |
| TcCLB.508251.40  | mucin TcMUCII, putative                                 | -2,364 | 1,66E-14   |
| TcCLB.508055.40  | surface protease GP63 (pseudogene), putative            | -2,366 | 2,391E-08  |
| TcCLB.508849.11  | trans-sialidase, putative (fragment)                    | -2,367 | 2,189E-17  |
| TcCLB.506955.270 | trans-sialidase, Group V, putative                      | -2,368 | 2,2E-33    |
| TcCLB.510561.20  | mucin TcMUCII, putative                                 | -2,368 | 2,511E-28  |
| TcCLB.508033.60  | mucin TcMUCII, putative                                 | -2,368 | 5,593E-24  |
| TcCLB.510915.5   | dispersed gene family protein 1 (DGF-1), putative       | -2,369 | 3,132E-40  |
| TcCLB.503503.40  | mucin-associated surface protein (MASP), putative       | -2,371 | 1,841E-32  |
| TcCLB.506425.5   | receptor-type adenylate cyclase, putative (fragment)    | -2,371 | 4,719E-31  |
| TcCLB.507987.10  | trans-sialidase, putative                               | -2,371 | 1,69E-20   |
| TcCLB.508253.10  | mucin-associated surface protein (MASP), putative       | -2,372 | 1,069E-65  |
| TcCLB.511173.230 | trans-sialidase (pseudogene), putative                  | -2,372 | 2,367E-35  |
| TcCLB.508165.400 | mucin TcMUCII, putative                                 | -2,373 | 1,178E-37  |
| TcCLB.504101.50  | trans-sialidase, Group V, putative                      | -2,374 | 5,346E-64  |
| TcCLB.508313.30  | mucin-associated surface protein (MASP), putative       | -2,374 | 2,438E-18  |
| TcCLB.510497.40  | trans-sialidase, Group V, putative                      | -2,375 | 1,099E-23  |
| TcCLB.504155.140 | mucin TcMUCII, putative                                 | -2,376 | 0,000186   |
| TcCLB.506613.110 | mucin-associated surface protein (MASP, pseudogene), pi | -2,377 | 2,348E-35  |
| TcCLB.510479.40  | trans-sialidase, putative (fragment)                    | -2,377 | 1,353E-20  |
| TcCLB.468217.14  | mucin-associated surface protein (MASP), putative       | -2,378 | 3,278E-43  |
| TcCLB.506967.50  | mucin-associated surface protein (MASP), putative       | -2,379 | 2,179E-17  |
| TcCLB.506577.80  | trans-sialidase, Group VIII, putative                   | -2,38  | 3,509E-93  |
| TcCLB.505949.10  | mucin TcMUCII, putative                                 | -2,38  | 9,321E-25  |
| TcCLB.506281.14  | hypothetical protein                                    | -2,381 | 4,507E-78  |
| TcCLB.510497.100 | mucin-associated surface protein (MASP), putative       | -2,381 | 2,902E-28  |
| TcCLB.511349.20  | trans-sialidase (pseudogene), putative                  | -2,382 | 1,048E-80  |
| TcCLB.511667.50  | mucin-associated surface protein (MASP), putative       | -2,383 | 1,911E-36  |
| TcCLB.509785.50  | trans-sialidase, Group V, putative                      | -2,384 | 2,386E-37  |
| TcCLB.506409.30  | mucin-associated surface protein (MASP), putative       | -2,384 | 3,261E-32  |
| TcCLB.510693.270 | trans-sialidase, Group VI, putative                     | -2,386 | 2,991E-22  |

|                  |                                                         |        |            |
|------------------|---------------------------------------------------------|--------|------------|
| TcCLB.506973.20  | mucin-associated surface protein (MASP), putative       | -2,388 | 5,007E-63  |
| TcCLB.510561.50  | mucin-associated surface protein (MASP), putative       | -2,39  | 1,295E-07  |
| TcCLB.511907.200 | cysteine peptidase inhibitor, putative                  | -2,392 | 2,678E-133 |
| TcCLB.510023.20  | mucin TcMUCII, putative                                 | -2,392 | 9,81E-30   |
| TcCLB.506763.110 | trans-sialidase, Group VII, putative                    | -2,393 | 9,252E-17  |
| TcCLB.510411.10  | trans-sialidase, Group II, putative                     | -2,394 | 1,292E-38  |
| TcCLB.509525.400 | mucin TcMUCII, putative                                 | -2,394 | 4,568E-22  |
| TcCLB.506761.54  | mucin-associated surface protein (MASP, pseudogene), pu | -2,396 | 5,586E-29  |
| TcCLB.506389.10  | trans-sialidase, putative                               | -2,397 | 3,939E-55  |
| TcCLB.506767.230 | mucin-associated surface protein (MASP), putative       | -2,397 | 2,474E-40  |
| TcCLB.506911.20  | mucin-associated surface protein (MASP), putative       | -2,398 | 2,271E-64  |
| TcCLB.508245.40  | mucin-associated surface protein (MASP), putative       | -2,399 | 2,654E-35  |
| TcCLB.506133.190 | trans-sialidase, Group VI, putative                     | -2,399 | 1,088E-15  |
| TcCLB.511149.180 | trans-sialidase, Group VI, putative                     | -2,4   | 1,652E-36  |
| TcCLB.511911.10  | trans-sialidase, Group II, putative                     | -2,4   | 5,765E-29  |
| TcCLB.505949.30  | trans-sialidase, Group V, putative                      | -2,4   | 5,7E-23    |
| TcCLB.507065.70  | mucin TcMUCII, putative                                 | -2,4   | 2,229E-12  |
| TcCLB.503773.40  | hypothetical protein, conserved                         | -2,401 | 1,217E-54  |
| TcCLB.503699.19  | mucin-associated surface protein (MASP), putative       | -2,402 | 3,339E-24  |
| TcCLB.506173.70  | trans-sialidase, Group V, putative                      | -2,403 | 3,494E-31  |
| TcCLB.510731.10  | trans-sialidase, putative                               | -2,405 | 6,859E-06  |
| TcCLB.510359.480 | mucin-associated surface protein (MASP, pseudogene), pu | -2,407 | 6,827E-08  |
| TcCLB.506501.380 | mucin-associated surface protein (MASP), putative       | -2,409 | 3,259E-28  |
| TcCLB.507705.20  | hypothetical protein, conserved                         | -2,411 | 3,334E-37  |
| TcCLB.510623.20  | mucin-associated surface protein (MASP), putative       | -2,412 | 8,787E-30  |
| TcCLB.510361.190 | mucin-associated surface protein (MASP), putative       | -2,413 | 1,139E-25  |
| TcCLB.506769.65  | trans-sialidase (pseudogene), putative                  | -2,413 | 1,722E-07  |
| TcCLB.511165.80  | protein kinase, putative                                | -2,413 | 6,006E-07  |
| TcCLB.511603.330 | mucin TcMUCII, putative                                 | -2,414 | 3,729E-20  |
| TcCLB.507957.10  | mucin-associated surface protein (MASP), putative       | -2,415 | 7,076E-68  |
| TcCLB.504197.20  | mucin-associated surface protein (MASP), putative       | -2,415 | 1,133E-42  |
| TcCLB.510359.530 | trans-sialidase, Group V, putative                      | -2,415 | 9,809E-31  |
| TcCLB.509655.10  | trans-sialidase (pseudogene), putative                  | -2,417 | 5,015E-45  |
| TcCLB.510061.30  | trans-sialidase, Group V, putative                      | -2,418 | 8,572E-55  |
| TcCLB.509075.20  | dispersed gene family protein 1 (DGF-1, pseudogene), pu | -2,418 | 1,124E-11  |
| TcCLB.506409.60  | hypothetical protein                                    | -2,418 | 5,352E-10  |
| TcCLB.508745.11  | trans-sialidase, putative (fragment)                    | -2,419 | 2,98E-20   |
| TcCLB.506603.20  | mucin-associated surface protein (MASP, pseudogene), pu | -2,422 | 3,034E-29  |
| TcCLB.508747.5   | mucin-associated surface protein (MASP), putative       | -2,423 | 3,46E-19   |
| TcCLB.506769.120 | mucin-associated surface protein (MASP), putative       | -2,424 | 9,693E-27  |
| TcCLB.508147.140 | mucin TcMUCII, putative                                 | -2,425 | 7,764E-15  |
| TcCLB.506139.160 | mucin-associated surface protein (MASP), putative       | -2,428 | 7,186E-32  |
| TcCLB.506289.150 | mucin-associated surface protein (MASP), putative       | -2,432 | 4,138E-44  |
| TcCLB.507043.21  | mucin TcMUCL, putative (fragment)                       | -2,432 | 7,339E-30  |
| TcCLB.508221.910 | mucin TcMUCII, putative                                 | -2,432 | 1,82E-18   |

|                  |                                                          |        |            |
|------------------|----------------------------------------------------------|--------|------------|
| TcCLB.506765.80  | mucin TcMUCII, putative                                  | -2,432 | 4,7E-10    |
| TcCLB.421231.10  | hypothetical protein, conserved                          | -2,433 | 6,427E-166 |
| TcCLB.507085.150 | mucin-associated surface protein (MASP), putative        | -2,433 | 1,633E-74  |
| TcCLB.509841.10  | trans-sialidase, putative                                | -2,433 | 1,278E-15  |
| TcCLB.505621.10  | mucin-associated surface protein (MASP, pseudogene), pi  | -2,434 | 8,331E-136 |
| TcCLB.506321.130 | mucin TcMUCII, putative                                  | -2,434 | 1,222E-23  |
| TcCLB.506499.40  | mucin-associated surface protein (MASP), putative        | -2,436 | 1,828E-29  |
| TcCLB.509753.110 | mucin TcMUCII, putative                                  | -2,436 | 4,69E-14   |
| TcCLB.511255.330 | mucin-associated surface protein (MASP), putative        | -2,437 | 3,063E-12  |
| TcCLB.507701.4   | mucin-associated surface protein (MASP), putative (fragm | -2,438 | 1,27E-21   |
| TcCLB.503783.70  | mucin TcMUCII, putative                                  | -2,44  | 2,582E-31  |
| TcCLB.432443.10  | mucin-associated surface protein (MASP), putative        | -2,441 | 3,713E-26  |
| TcCLB.504039.160 | mucin-associated surface protein (MASP), putative        | -2,443 | 1,797E-10  |
| TcCLB.511553.100 | mucin-associated surface protein (MASP), putative        | -2,444 | 3,124E-41  |
| TcCLB.511593.20  | mucin TcMUCII, putative                                  | -2,445 | 7,132E-25  |
| TcCLB.508501.70  | mucin TcMUCII, putative                                  | -2,446 | 8,866E-43  |
| TcCLB.509287.220 | hypothetical protein, conserved                          | -2,447 | 3,446E-130 |
| TcCLB.508243.60  | mucin TcMUCII, putative                                  | -2,447 | 1,347E-18  |
| TcCLB.508745.20  | mucin-associated surface protein (MASP), putative        | -2,45  | 1,568E-41  |
| TcCLB.510047.100 | mucin-associated surface protein (MASP, pseudogene), pi  | -2,45  | 7,788E-41  |
| TcCLB.510583.114 | mucin-associated surface protein (MASP, pseudogene), pi  | -2,45  | 0,00001299 |
| TcCLB.506309.110 | mucin TcMUCII, putative                                  | -2,451 | 2,23E-18   |
| TcCLB.510693.120 | trans-sialidase (pseudogene), putative                   | -2,452 | 1,505E-29  |
| TcCLB.506769.70  | mucin TcMUCII, putative                                  | -2,454 | 8,892E-23  |
| TcCLB.508365.30  | mucin TcMUCII, putative                                  | -2,455 | 8,496E-26  |
| TcCLB.510623.39  | mucin-associated surface protein (MASP, pseudogene), pi  | -2,455 | 1,476E-09  |
| TcCLB.508365.4   | mucin-associated surface protein (MASP), putative        | -2,456 | 1,974E-14  |
| TcCLB.508161.23  | hypothetical protein                                     | -2,456 | 1,133E-12  |
| TcCLB.508365.80  | hypothetical protein                                     | -2,456 | 0,0001245  |
| TcCLB.504081.390 | trans-sialidase (pseudogene), putative                   | -2,457 | 9,24E-45   |
| TcCLB.511183.190 | trans-sialidase, Group V, putative                       | -2,457 | 1,212E-31  |
| TcCLB.507091.100 | trans-sialidase (pseudogene), putative                   | -2,457 | 1,092E-30  |
| TcCLB.509993.40  | mucin TcMUCI, putative                                   | -2,458 | 2,922E-30  |
| TcCLB.509897.279 | mucin-associated surface protein (MASP), putative        | -2,458 | 2,558E-24  |
| TcCLB.509897.170 | mucin-associated surface protein (MASP, pseudogene), pi  | -2,459 | 2,595E-63  |
| TcCLB.510189.40  | mucin-associated surface protein (MASP), putative        | -2,459 | 3,382E-37  |
| TcCLB.511839.30  | mucin-associated surface protein (MASP), putative        | -2,459 | 2,18E-25   |
| TcCLB.507959.140 | mucin TcMUCII, putative                                  | -2,459 | 0,0000223  |
| TcCLB.507047.40  | trans-sialidase, Group II, putative                      | -2,46  | 1,398E-123 |
| TcCLB.503645.10  | mucin-associated surface protein (MASP), putative        | -2,46  | 3,12E-28   |
| TcCLB.507071.180 | mucin-associated surface protein (MASP), putative        | -2,461 | 1,173E-39  |
| TcCLB.509525.150 | mucin TcMUCII, putative                                  | -2,462 | 6,433E-20  |
| TcCLB.511853.10  | mucin TcMUCI, putative                                   | -2,464 | 4,972E-18  |
| TcCLB.506759.170 | mucin-associated surface protein (MASP), putative        | -2,467 | 1,12E-36   |
| TcCLB.510047.129 | mucin TcMUCII, putative                                  | -2,47  | 3,552E-09  |

|                  |                                                         |        |            |
|------------------|---------------------------------------------------------|--------|------------|
| TcCLB.511173.309 | mucin-associated surface protein (MASP, pseudogene), pi | -2,474 | 1,801E-20  |
| TcCLB.509267.110 | heat shock protein Hsp20, putative                      | -2,475 | 2,702E-80  |
| TcCLB.509081.150 | mucin-associated surface protein (MASP), putative       | -2,475 | 3,322E-46  |
| TcCLB.510483.250 | trans-sialidase (pseudogene), putative                  | -2,475 | 4,184E-39  |
| TcCLB.507237.20  | mucin-associated surface protein (MASP), putative       | -2,475 | 7,202E-17  |
| TcCLB.503973.320 | mucin TcMUCII, putative                                 | -2,476 | 1,564E-10  |
| TcCLB.506501.160 | mucin-associated surface protein (MASP, pseudogene), pi | -2,477 | 1,979E-28  |
| TcCLB.510021.130 | mucin-associated surface protein (MASP), putative       | -2,478 | 2,193E-71  |
| TcCLB.508229.30  | mucin-associated surface protein (MASP), putative       | -2,478 | 1,216E-49  |
| TcCLB.509525.10  | mucin-associated surface protein (MASP, pseudogene), pi | -2,478 | 5,164E-19  |
| TcCLB.507605.26  | mucin TcMUCII, putative                                 | -2,478 | 1,644E-08  |
| TcCLB.506499.160 | mucin-associated surface protein (MASP), putative       | -2,479 | 5,809E-43  |
| TcCLB.507957.50  | mucin TcMUCII, putative                                 | -2,48  | 1,074E-37  |
| TcCLB.511599.10  | trans-sialidase, putative                               | -2,481 | 1,158E-10  |
| TcCLB.510371.110 | mucin TcMUCII, putative                                 | -2,484 | 6,474E-13  |
| TcCLB.508495.50  | mucin TcMUCII, putative                                 | -2,488 | 3,08E-64   |
| TcCLB.508119.70  | mucin TcMUCII, putative                                 | -2,489 | 1,508E-86  |
| TcCLB.510015.20  | mucin TcMUCII, putative                                 | -2,49  | 1,359E-30  |
| TcCLB.506763.80  | mucin TcMUCII, putative                                 | -2,49  | 2,932E-29  |
| TcCLB.506599.80  | mucin-associated surface protein (MASP), putative       | -2,492 | 3,284E-19  |
| TcCLB.506897.10  | mucin TcMUCII, putative                                 | -2,492 | 1,527E-16  |
| TcCLB.509419.160 | mucin TcMUCII, putative                                 | -2,492 | 1,026E-11  |
| TcCLB.506763.280 | mucin-associated surface protein (MASP), putative       | -2,493 | 3,048E-61  |
| TcCLB.509081.110 | mucin-associated surface protein (MASP), putative       | -2,493 | 2,045E-38  |
| TcCLB.504035.21  | hypothetical protein                                    | -2,493 | 6,211E-17  |
| TcCLB.508577.10  | trans-sialidase (pseudogene), putative                  | -2,494 | 7,347E-40  |
| TcCLB.508495.200 | mucin TcMUCII, putative                                 | -2,496 | 3,253E-106 |
| TcCLB.506321.10  | mucin TcMUCII, putative                                 | -2,496 | 2,084E-31  |
| TcCLB.509753.20  | trans-sialidase (pseudogene), putative                  | -2,497 | 3,154E-65  |
| TcCLB.504031.60  | mucin-associated surface protein (MASP, pseudogene), pi | -2,497 | 1,216E-34  |
| TcCLB.507429.3   | mucin-associated surface protein (MASP), putative       | -2,497 | 4,954E-29  |
| TcCLB.509411.10  | trans-sialidase, Group II, putative                     | -2,497 | 3,645E-22  |
| TcCLB.510497.50  | mucin-associated surface protein (MASP), putative       | -2,498 | 4,142E-43  |
| TcCLB.508493.130 | mucin TcMUCII, putative                                 | -2,5   | 2,72E-54   |
| TcCLB.504639.60  | trans-sialidase, putative                               | -2,5   | 1,091E-53  |
| TcCLB.507523.70  | trans-sialidase, Group V, putative                      | -2,5   | 3,238E-27  |
| TcCLB.510419.11  | mucin-associated surface protein (MASP, pseudogene), pi | -2,501 | 1,238E-08  |
| TcCLB.510463.200 | mucin-associated surface protein (MASP), putative       | -2,502 | 3,006E-36  |
| TcCLB.510013.310 | mucin-associated surface protein (MASP), putative       | -2,503 | 5,275E-50  |
| TcCLB.510585.10  | mucin-associated surface protein (MASP, pseudogene), pi | -2,503 | 4,666E-14  |
| TcCLB.511871.120 | mucin-associated surface protein (MASP), putative       | -2,505 | 3,498E-41  |
| TcCLB.511223.20  | trans-sialidase, putative                               | -2,505 | 1,415E-11  |
| TcCLB.508589.5   | trans-sialidase, putative (fragment)                    | -2,506 | 1,596E-33  |
| TcCLB.510275.330 | mucin TcMUCII, putative                                 | -2,508 | 1,046E-22  |
| TcCLB.506281.50  | mucin TcMUCII, putative                                 | -2,511 | 1,589E-82  |

|                  |                                                         |        |            |
|------------------|---------------------------------------------------------|--------|------------|
| TcCLB.511605.20  | mucin-associated surface protein (MASP), putative       | -2,513 | 3,28E-32   |
| TcCLB.511077.40  | trans-sialidase (pseudogene), putative                  | -2,516 | 6,368E-22  |
| TcCLB.453767.20  | trans-sialidase (pseudogene), putative                  | -2,517 | 2,237E-40  |
| TcCLB.509233.10  | hypothetical protein                                    | -2,517 | 1,302E-10  |
| TcCLB.510483.60  | trans-sialidase, Group V, putative                      | -2,519 | 3,188E-24  |
| TcCLB.504787.60  | mucin TcMUCII (pseudogene), putative                    | -2,52  | 4,368E-34  |
| TcCLB.510483.230 | mucin-associated surface protein (MASP), putative       | -2,52  | 1,738E-26  |
| TcCLB.510275.370 | mucin-associated surface protein (MASP), putative       | -2,523 | 3,451E-63  |
| TcCLB.506667.160 | trans-sialidase, Group V, putative                      | -2,523 | 5,856E-23  |
| TcCLB.504261.100 | mucin-associated surface protein (MASP, pseudogene), pi | -2,523 | 3,428E-20  |
| TcCLB.511593.70  | mucin TcMUCII, putative                                 | -2,523 | 1,46E-17   |
| TcCLB.503585.10  | mucin-associated surface protein (MASP), putative       | -2,524 | 3,355E-14  |
| TcCLB.506131.10  | mucin TcMUCII, putative                                 | -2,525 | 1,018E-15  |
| TcCLB.506009.40  | hypothetical protein                                    | -2,526 | 6,807E-70  |
| TcCLB.506813.70  | mucin-associated surface protein (MASP, pseudogene), pi | -2,526 | 4,409E-22  |
| TcCLB.440379.10  | trans-sialidase, putative (fragment)                    | -2,527 | 7,318E-48  |
| TcCLB.510329.70  | cdc2-related kinase 10, putative (CRK10)                | -2,528 | 4,937E-79  |
| TcCLB.506929.54  | hypothetical protein                                    | -2,528 | 2,203E-59  |
| TcCLB.510921.40  | trans-sialidase, putative (fragment)                    | -2,532 | 1,789E-28  |
| TcCLB.506781.39  | mucin-associated surface protein (MASP), putative       | -2,532 | 1,198E-12  |
| TcCLB.509475.10  | mitogen-activated protein kinase 3, putative            | -2,533 | 1,188E-43  |
| TcCLB.508221.420 | mucin-associated surface protein (MASP), putative       | -2,533 | 1,144E-16  |
| TcCLB.509291.20  | mucin-associated surface protein (MASP), putative       | -2,533 | 1,95E-15   |
| TcCLB.511553.209 | mucin TcMUC (pseudogene), putative                      | -2,534 | 1,377E-27  |
| TcCLB.510279.120 | mucin-associated surface protein (MASP), putative       | -2,534 | 5,767E-18  |
| TcCLB.508171.10  | trans-sialidase, Group VIII, putative                   | -2,536 | 1,288E-29  |
| TcCLB.506667.90  | trans-sialidase, Group V, putative                      | -2,536 | 1,892E-19  |
| TcCLB.508293.10  | trans-sialidase (pseudogene), putative                  | -2,537 | 2,059E-34  |
| TcCLB.511123.11  | trans-sialidase, putative (fragment)                    | -2,538 | 5,847E-41  |
| TcCLB.508309.10  | mucin-associated surface protein (MASP), putative       | -2,538 | 9,345E-23  |
| TcCLB.511511.5   | hypothetical protein                                    | -2,539 | 1,98E-24   |
| TcCLB.508165.50  | mucin-associated surface protein (MASP), putative       | -2,539 | 1,664E-12  |
| TcCLB.508365.240 | mucin TcMUCII, putative                                 | -2,539 | 4,21E-10   |
| TcCLB.506321.140 | mucin-associated surface protein (MASP), putative       | -2,54  | 2,009E-56  |
| TcCLB.506965.100 | mucin-associated surface protein (MASP), putative       | -2,542 | 3,019E-31  |
| TcCLB.507487.30  | mucin TcMUCII, putative                                 | -2,542 | 1,428E-14  |
| TcCLB.510021.190 | hypothetical protein                                    | -2,542 | 0,00000066 |
| TcCLB.510933.20  | mucin-associated surface protein (MASP), putative       | -2,547 | 1,193E-34  |
| TcCLB.508049.40  | hypothetical protein, conserved                         | -2,547 | 1,289E-15  |
| TcCLB.506131.30  | mucin-associated surface protein (MASP), putative       | -2,55  | 6,974E-19  |
| TcCLB.506783.39  | mucin-associated surface protein (MASP), putative       | -2,551 | 7,856E-20  |
| TcCLB.510369.10  | mucin-associated surface protein (MASP), putative       | -2,553 | 3,795E-32  |
| TcCLB.504155.170 | mucin TcMUCII, putative                                 | -2,553 | 3,721E-15  |
| TcCLB.510465.24  | mucin-associated surface protein (MASP, pseudogene), pi | -2,554 | 7,623E-10  |
| TcCLB.508219.170 | trans-sialidase (pseudogene), putative                  | -2,556 | 6,903E-29  |

|                  |                                                          |        |            |
|------------------|----------------------------------------------------------|--------|------------|
| TcCLB.507163.11  | mucin TcMUCII, putative (fragment)                       | -2,556 | 1,193E-15  |
| TcCLB.505945.5   | mitogen-activated protein kinase 3, putative (fragment)  | -2,561 | 2,319E-21  |
| TcCLB.506759.210 | mucin TcMUCII, putative                                  | -2,561 | 2,022E-15  |
| TcCLB.510799.60  | mucin TcMUCII, putative                                  | -2,566 | 1,979E-47  |
| TcCLB.510013.300 | mucin TcMUCII, putative                                  | -2,568 | 1,326E-15  |
| TcCLB.506879.10  | mucin-associated surface protein (MASP), putative        | -2,57  | 4,462E-22  |
| TcCLB.510557.70  | mucin TcMUCII, putative                                  | -2,571 | 1,939E-61  |
| TcCLB.508163.230 | mucin-associated surface protein (MASP), putative        | -2,571 | 3,041E-17  |
| TcCLB.510705.10  | mucin-associated surface protein (MASP), putative        | -2,571 | 2,269E-09  |
| TcCLB.510933.190 | mucin TcMUCII, putative                                  | -2,572 | 8,87E-25   |
| TcCLB.506501.120 | mucin TcMUCII, putative                                  | -2,572 | 6,434E-17  |
| TcCLB.509549.140 | trans-sialidase, putative                                | -2,573 | 7,637E-68  |
| TcCLB.508201.30  | mucin-associated surface protein (MASP), putative        | -2,574 | 4,021E-80  |
| TcCLB.507085.140 | mucin TcMUCII, putative                                  | -2,574 | 3,289E-35  |
| TcCLB.510461.30  | mucin-associated surface protein (MASP), putative (fragn | -2,574 | 0,00000262 |
| TcCLB.508735.30  | mucin-associated surface protein (MASP), putative        | -2,575 | 9,358E-85  |
| TcCLB.506955.244 | mucin-associated surface protein (MASP), putative        | -2,576 | 3,088E-37  |
| TcCLB.506267.60  | mucin TcMUCII, putative                                  | -2,576 | 2,65E-29   |
| TcCLB.504239.20  | mucin TcMUCII, putative                                  | -2,576 | 8,823E-26  |
| TcCLB.507959.260 | mucin-associated surface protein (MASP), putative        | -2,576 | 8,018E-22  |
| TcCLB.510377.30  | mucin-associated surface protein (MASP, pseudogene), pi  | -2,576 | 9,436E-20  |
| TcCLB.510303.140 | surface protease GP63, putative                          | -2,577 | 5,369E-160 |
| TcCLB.511079.60  | mucin-associated surface protein (MASP), putative        | -2,577 | 4,605E-21  |
| TcCLB.506001.50  | mucin-associated surface protein (MASP), putative        | -2,578 | 1,302E-84  |
| TcCLB.510303.20  | surface protease GP63, putative                          | -2,579 | 3,142E-48  |
| TcCLB.473703.10  | surface protease GP63, putative                          | -2,579 | 4,255E-15  |
| TcCLB.510377.310 | mucin-associated surface protein (MASP, pseudogene), pi  | -2,58  | 6,485E-20  |
| TcCLB.506599.240 | mucin-associated surface protein (MASP), putative        | -2,582 | 4,513E-73  |
| TcCLB.508509.20  | mucin TcMUCII, putative                                  | -2,582 | 2,703E-23  |
| TcCLB.506599.390 | mucin-associated surface protein (MASP), putative        | -2,582 | 1,959E-21  |
| TcCLB.504441.10  | trans-sialidase, putative (fragment)                     | -2,583 | 5,698E-21  |
| TcCLB.510199.30  | mucin-associated surface protein (MASP), putative        | -2,584 | 2,065E-46  |
| TcCLB.511603.200 | mucin TcMUCII, putative                                  | -2,585 | 1,293E-25  |
| TcCLB.503705.19  | trans-sialidase, putative                                | -2,585 | 3,599E-08  |
| TcCLB.476833.10  | trans-sialidase, putative                                | -2,586 | 4,256E-13  |
| TcCLB.508511.49  | trans-sialidase, putative                                | -2,588 | 2,935E-37  |
| TcCLB.506297.60  | hypothetical protein, conserved                          | -2,589 | 3,171E-133 |
| TcCLB.508501.40  | mucin TcMUCII, putative                                  | -2,589 | 5,803E-63  |
| TcCLB.508123.10  | hypothetical protein, conserved                          | -2,59  | 2,968E-75  |
| TcCLB.508125.130 | mucin TcMUCII, putative                                  | -2,59  | 1,106E-24  |
| TcCLB.508521.20  | trans-sialidase, Group VIII, putative                    | -2,592 | 9,704E-71  |
| TcCLB.503503.30  | mucin TcMUCII, putative                                  | -2,592 | 7,257E-70  |
| TcCLB.508903.10  | trans-sialidase (pseudogene), putative                   | -2,592 | 2,811E-40  |
| TcCLB.510463.259 | mucin-associated surface protein (MASP), putative (fragn | -2,592 | 3,528E-33  |
| TcCLB.459061.10  | trans-sialidase, putative                                | -2,593 | 1,215E-46  |

|                  |                                                          |        |            |
|------------------|----------------------------------------------------------|--------|------------|
| TcCLB.510713.110 | mucin-associated surface protein (MASP), putative        | -2,594 | 7,898E-24  |
| TcCLB.506289.250 | surface protease GP63 (pseudogene), putative             | -2,595 | 1,175E-26  |
| TcCLB.511669.10  | trans-sialidase, Group VIII, putative                    | -2,597 | 4,504E-86  |
| TcCLB.507961.10  | mucin-associated surface protein (MASP, pseudogene), pu  | -2,597 | 2,818E-31  |
| TcCLB.509419.80  | mucin-associated surface protein (MASP), putative        | -2,597 | 6,116E-08  |
| TcCLB.508289.20  | mucin TcMUCII, putative                                  | -2,598 | 3,622E-11  |
| TcCLB.507069.120 | trans-sialidase (pseudogene), putative                   | -2,599 | 1,343E-39  |
| TcCLB.511595.30  | mucin-associated surface protein (MASP), putative        | -2,6   | 4,482E-23  |
| TcCLB.510377.390 | mucin-associated surface protein (MASP), putative        | -2,601 | 1,032E-23  |
| TcCLB.510933.10  | trans-sialidase, Group V, putative                       | -2,604 | 1,769E-39  |
| TcCLB.506601.40  | mucin-associated surface protein (MASP), putative        | -2,604 | 3,24E-25   |
| TcCLB.510773.40  | hypothetical protein                                     | -2,605 | 1,451E-54  |
| TcCLB.510699.80  | mucin-associated surface protein (MASP), putative        | -2,605 | 6,245E-24  |
| TcCLB.506885.480 | trans-sialidase, Group V, putative                       | -2,607 | 2,531E-43  |
| TcCLB.509553.60  | mitogen-activated protein kinase 3, putative             | -2,608 | 1,221E-80  |
| TcCLB.506173.120 | mucin TcMUCI, putative                                   | -2,608 | 5,48E-25   |
| TcCLB.508247.70  | mucin TcMUCII, putative                                  | -2,61  | 3,877E-19  |
| TcCLB.503501.7   | mucin-associated surface protein (MASP), putative (fragn | -2,61  | 3,18E-08   |
| TcCLB.507429.30  | mucin TcMUCII, putative                                  | -2,611 | 2,43E-79   |
| TcCLB.507035.11  | trans-sialidase, putative (fragment)                     | -2,611 | 1,08E-41   |
| TcCLB.429251.10  | mucin-associated surface protein (MASP), putative        | -2,611 | 2,192E-06  |
| TcCLB.504429.50  | trans-sialidase (pseudogene), putative                   | -2,614 | 1,047E-53  |
| TcCLB.511607.110 | mucin-associated surface protein (MASP), putative        | -2,617 | 6,37E-57   |
| TcCLB.511605.5   | mucin-associated surface protein (MASP, pseudogene), pu  | -2,617 | 1,029E-31  |
| TcCLB.510025.90  | mucin TcMUCII, putative                                  | -2,617 | 2,281E-27  |
| TcCLB.503717.31  | mucin TcMUCII, putative                                  | -2,618 | 1,966E-23  |
| TcCLB.503837.5   | mucin TcMUCI, putative (fragment)                        | -2,619 | 8,219E-51  |
| TcCLB.506615.150 | trans-sialidase, Group V, putative                       | -2,62  | 1,472E-148 |
| TcCLB.511063.40  | trans-sialidase, Group V, putative                       | -2,62  | 1,003E-24  |
| TcCLB.509097.20  | trans-sialidase, Group V, putative                       | -2,621 | 1,522E-49  |
| TcCLB.506599.224 | mucin TcMUCII, putative                                  | -2,622 | 1,964E-19  |
| TcCLB.510021.10  | mucin TcMUCII, putative                                  | -2,622 | 6,046E-19  |
| TcCLB.442801.10  | mucin TcMUCII, putative                                  | -2,622 | 1,743E-18  |
| TcCLB.506939.180 | mucin-associated surface protein (MASP), putative        | -2,623 | 1,76E-60   |
| TcCLB.511105.60  | trans-sialidase, putative                                | -2,624 | 5,444E-75  |
| TcCLB.506787.19  | mucin-associated surface protein (MASP, pseudogene), pu  | -2,624 | 9,955E-14  |
| TcCLB.509115.30  | mucin-associated surface protein (MASP), putative        | -2,625 | 1,76E-51   |
| TcCLB.506101.10  | mucin-associated surface protein (MASP), putative        | -2,626 | 2,72E-42   |
| TcCLB.509419.90  | trans-sialidase, Group V, putative                       | -2,626 | 2,201E-08  |
| TcCLB.507071.210 | mucin TcMUCII, putative                                  | -2,627 | 1,026E-16  |
| TcCLB.508143.80  | mucin-associated surface protein (MASP), putative        | -2,63  | 6,589E-36  |
| TcCLB.510359.40  | hypothetical protein, conserved                          | -2,631 | 3,102E-43  |
| TcCLB.509525.160 | mucin-associated surface protein (MASP, pseudogene), pu  | -2,632 | 1,057E-32  |
| TcCLB.508243.50  | mucin-associated surface protein (MASP), putative        | -2,632 | 3,911E-26  |
| TcCLB.510791.20  | mucin TcMUCII, putative                                  | -2,633 | 1,542E-62  |

|                  |                                                          |        |           |
|------------------|----------------------------------------------------------|--------|-----------|
| TcCLB.510363.160 | mucin-associated surface protein (MASP, pseudogene), pi  | -2,633 | 1,327E-42 |
| TcCLB.510275.400 | mucin-associated surface protein (MASP), putative        | -2,634 | 6,195E-39 |
| TcCLB.506443.100 | trans-sialidase, Group IV, putative                      | -2,636 | 1,95E-98  |
| TcCLB.503761.40  | mucin-associated surface protein (MASP), putative        | -2,636 | 2,777E-90 |
| TcCLB.510237.80  | trans-sialidase, Group V, putative                       | -2,637 | 1,182E-46 |
| TcCLB.507069.94  | mucin-associated surface protein (MASP), putative        | -2,637 | 2,005E-32 |
| TcCLB.507985.30  | trans-sialidase (pseudogene), putative                   | -2,639 | 7,003E-07 |
| TcCLB.506855.220 | surface protease GP63, putative                          | -2,641 | 1,8E-16   |
| TcCLB.506801.60  | mucin-like glycoprotein, putative                        | -2,642 | 1,238E-55 |
| TcCLB.506499.220 | 90 kDa surface protein, putative                         | -2,642 | 2,748E-39 |
| TcCLB.511427.10  | conserved protein, unknown function (fragment)           | -2,642 | 4,44E-07  |
| TcCLB.509479.20  | mucin TcMUCII, putative                                  | -2,645 | 1,097E-28 |
| TcCLB.510089.10  | mucin-associated surface protein (MASP), putative        | -2,646 | 4,311E-36 |
| TcCLB.507071.250 | mucin TcMUCII, putative                                  | -2,646 | 1,062E-22 |
| TcCLB.510697.80  | mucin-associated surface protein (MASP), putative        | -2,648 | 3,843E-82 |
| TcCLB.504081.460 | mucin-associated surface protein (MASP), putative        | -2,648 | 5,62E-53  |
| TcCLB.480997.10  | hypothetical protein, conserved                          | -2,649 | 3,337E-10 |
| TcCLB.509811.18  | mucin-associated surface protein (MASP, pseudogene), pi  | -2,65  | 3,752E-31 |
| TcCLB.506599.360 | mucin-associated surface protein (MASP, pseudogene), pi  | -2,651 | 1,004E-35 |
| TcCLB.506291.10  | mucin-associated surface protein (MASP), putative        | -2,653 | 2,519E-37 |
| TcCLB.509003.40  | calpain-like cysteine peptidase, putative                | -2,654 | 7,462E-53 |
| TcCLB.508451.60  | trans-sialidase, Group II, putative                      | -2,654 | 8,374E-38 |
| TcCLB.506339.40  | mucin-associated surface protein (MASP), putative        | -2,654 | 6,465E-17 |
| TcCLB.511257.90  | mucin-associated surface protein (MASP), putative        | -2,655 | 4,711E-51 |
| TcCLB.511099.70  | mucin TcMUCII, putative                                  | -2,655 | 1,005E-12 |
| TcCLB.510681.9   | surface protease GP63, putative                          | -2,657 | 2,032E-27 |
| TcCLB.506331.200 | trans-sialidase (pseudogene), putative                   | -2,658 | 1,743E-37 |
| TcCLB.508295.50  | mucin TcMUCII, putative                                  | -2,659 | 6,635E-24 |
| TcCLB.510359.460 | mucin-associated surface protein (MASP), putative        | -2,659 | 1,646E-12 |
| TcCLB.511255.200 | mucin-associated surface protein (MASP), putative        | -2,66  | 4,92E-29  |
| TcCLB.506759.220 | mucin-associated surface protein (MASP), putative        | -2,66  | 3,691E-22 |
| TcCLB.506769.30  | mucin-associated surface protein (MASP), putative        | -2,661 | 2,026E-60 |
| TcCLB.509079.20  | mucin-associated surface protein (MASP), putative        | -2,663 | 5,429E-33 |
| TcCLB.511083.39  | mucin-associated surface protein (MASP), putative        | -2,664 | 6,666E-44 |
| TcCLB.511843.10  | mucin-associated surface protein (MASP), putative        | -2,669 | 1,722E-35 |
| TcCLB.506765.40  | trans-sialidase, Group II, putative                      | -2,669 | 2,091E-24 |
| TcCLB.503501.70  | mucin-associated surface protein (MASP), putative (fragm | -2,671 | 4,437E-42 |
| TcCLB.511183.80  | mucin-associated surface protein (MASP), putative        | -2,671 | 1,718E-30 |
| TcCLB.511183.400 | trans-sialidase, Group VI, putative                      | -2,672 | 5,433E-59 |
| TcCLB.505343.10  | trans-sialidase (pseudogene), putative                   | -2,673 | 2,276E-33 |
| TcCLB.504235.9   | hypothetical protein, conserved (fragment)               | -2,674 | 8,933E-56 |
| TcCLB.510693.190 | mucin-associated surface protein (MASP), putative        | -2,674 | 2,326E-30 |
| TcCLB.508873.520 | mucin-associated surface protein (MASP, pseudogene), pi  | -2,675 | 1,628E-26 |
| TcCLB.506767.74  | mucin TcMUCII (pseudogene), putative                     | -2,676 | 2,086E-18 |
| TcCLB.511385.50  | hypothetical protein                                     | -2,677 | 5,6E-71   |



|                  |                                                        |        |            |
|------------------|--------------------------------------------------------|--------|------------|
| TcCLB.503717.120 | trans-sialidase, Group V, putative                     | -2,677 | 4,757E-45  |
| TcCLB.506609.30  | trans-sialidase, Group V, putative                     | -2,677 | 6,012E-12  |
| TcCLB.506459.149 | mucin-associated surface protein (MASP), putative      | -2,678 | 6,889E-97  |
| TcCLB.505297.70  | mucin TcMUCII, putative                                | -2,678 | 8,626E-74  |
| TcCLB.506901.10  | mucin TcMUCI, putative                                 | -2,678 | 1,846E-07  |
| TcCLB.511089.140 | mucin-associated surface protein (MASP), putative      | -2,679 | 3,345E-26  |
| TcCLB.505949.80  | mucin-associated surface protein (MASP), putative      | -2,681 | 2,55E-50   |
| TcCLB.504201.50  | mucin-associated surface protein (MASP), putative      | -2,681 | 1,173E-35  |
| TcCLB.511643.70  | trans-sialidase, Group VI, putative                    | -2,681 | 1,215E-17  |
| TcCLB.510693.230 | mucin-associated surface protein (MASP), putative      | -2,682 | 3,064E-24  |
| TcCLB.507237.160 | mucin TcMUCII, putative                                | -2,682 | 9,423E-12  |
| TcCLB.510239.60  | mucin TcMUCII, putative                                | -2,683 | 1,337E-17  |
| TcCLB.506133.170 | mucin-associated surface protein (MASP, pseudogene), p | -2,684 | 6,108E-48  |
| TcCLB.508871.110 | trans-sialidase, Group V, putative                     | -2,685 | 3,794E-36  |
| TcCLB.508885.5   | mucin-associated surface protein (MASP), putative      | -2,685 | 7,992E-07  |
| TcCLB.506781.19  | mucin-associated surface protein (MASP), putative      | -2,686 | 8,424E-25  |
| TcCLB.507723.50  | trans-sialidase, Group IV, putative                    | -2,687 | 1,56E-33   |
| TcCLB.510373.70  | mucin TcMUCII, putative                                | -2,687 | 9,943E-17  |
| TcCLB.508433.180 | mucin-associated surface protein (MASP), putative      | -2,692 | 1,388E-64  |
| TcCLB.511603.320 | mucin-associated surface protein (MASP), putative      | -2,692 | 1,835E-21  |
| TcCLB.510191.80  | mucin TcMUCII, putative                                | -2,694 | 1,431E-18  |
| TcCLB.511871.150 | trans-sialidase (pseudogene), putative                 | -2,697 | 1,72E-70   |
| TcCLB.508365.210 | mucin TcMUCI, putative                                 | -2,7   | 4,715E-13  |
| TcCLB.510915.10  | mucin-associated surface protein (MASP), putative      | -2,701 | 7,256E-104 |
| TcCLB.510017.59  | mucin-associated surface protein (MASP), putative      | -2,701 | 2,69E-67   |
| TcCLB.487455.10  | trans-sialidase, putative (fragment)                   | -2,702 | 5,028E-15  |
| TcCLB.507167.80  | trans-sialidase, Group II, putative                    | -2,705 | 1,56E-45   |
| TcCLB.510457.10  | mucin-associated surface protein (MASP), putative      | -2,705 | 2,173E-16  |
| TcCLB.509869.10  | mucin TcMUCI, putative                                 | -2,707 | 1,156E-31  |
| TcCLB.510693.280 | mucin-associated surface protein (MASP), putative      | -2,709 | 2,872E-83  |
| TcCLB.506501.70  | mucin TcMUCII, putative                                | -2,709 | 3,77E-36   |
| TcCLB.506501.240 | mucin-associated surface protein (MASP), putative      | -2,709 | 6,555E-16  |
| TcCLB.421621.50  | mucin-associated surface protein (MASP), putative      | -2,709 | 2,141E-14  |
| TcCLB.509539.10  | trans-sialidase (pseudogene), putative                 | -2,71  | 1,505E-94  |
| TcCLB.504873.10  | UDP-Gal or UDP-GlcNAc-dependent glycosyltransferase, p | -2,71  | 3,148E-76  |
| TcCLB.509905.150 | trans-sialidase, Group II, putative                    | -2,711 | 7,778E-297 |
| TcCLB.508121.80  | mucin TcMUCII, putative                                | -2,711 | 1,404E-17  |
| TcCLB.508293.60  | trans-sialidase, Group VI, putative                    | -2,712 | 5,281E-49  |
| TcCLB.507959.200 | mucin TcMUCII, putative                                | -2,712 | 1,369E-30  |
| TcCLB.507859.15  | hypothetical protein                                   | -2,714 | 1,604E-40  |
| TcCLB.510201.40  | trans-sialidase (pseudogene), putative                 | -2,717 | 2,8E-69    |
| TcCLB.510377.150 | mucin TcMUCII, putative                                | -2,717 | 1,67E-08   |
| TcCLB.511851.50  | mucin TcMUCI, putative                                 | -2,719 | 8,34E-37   |
| TcCLB.507163.30  | 90 kDa surface protein, putative                       | -2,722 | 4,536E-26  |
| TcCLB.504575.60  | surface protease GP63, putative (fragment)             | -2,724 | 3,576E-09  |

|                  |                                                         |        |            |
|------------------|---------------------------------------------------------|--------|------------|
| TcCLB.506661.160 | hypothetical protein, conserved                         | -2,726 | 3,398E-52  |
| TcCLB.506587.44  | hypothetical protein                                    | -2,727 | 4,352E-100 |
| TcCLB.510377.450 | mucin-associated surface protein (MASP), putative       | -2,727 | 1,812E-49  |
| TcCLB.507711.100 | procyclic form surface phosphoprotein, putative         | -2,728 | 1,663E-129 |
| TcCLB.504039.90  | mucin-associated surface protein (MASP, pseudogene), pi | -2,73  | 1,626E-35  |
| TcCLB.508221.660 | mucin-associated surface protein (MASP), putative       | -2,732 | 1,58E-18   |
| TcCLB.506767.220 | mucin TcMUCII, putative                                 | -2,733 | 1,42E-26   |
| TcCLB.511151.110 | surface protease GP63, putative (fragment)              | -2,734 | 1,33E-209  |
| TcCLB.503491.19  | mucin-associated surface protein (MASP), putative       | -2,734 | 6,302E-29  |
| TcCLB.508501.140 | mucin TcMUCII, putative                                 | -2,735 | 7,091E-87  |
| TcCLB.503811.45  | hypothetical protein, conserved                         | -2,735 | 7,518E-66  |
| TcCLB.507705.30  | hypothetical protein, conserved                         | -2,736 | 5,862E-61  |
| TcCLB.506573.5   | surface antigen TASV-A8, putative (TASV-A8)             | -2,737 | 1,034E-227 |
| TcCLB.511153.40  | surface protease GP63, putative                         | -2,737 | 4,212E-165 |
| TcCLB.509975.30  | mucin-associated surface protein (MASP), putative       | -2,738 | 4,184E-151 |
| TcCLB.508873.330 | trans-sialidase, Group V, putative                      | -2,738 | 9,665E-67  |
| TcCLB.510833.20  | mucin-associated surface protein (MASP), putative       | -2,741 | 1,117E-61  |
| TcCLB.511449.80  | mucin-associated surface protein (MASP, pseudogene), pi | -2,744 | 2,662E-14  |
| TcCLB.506285.30  | trans-sialidase (pseudogene), putative                  | -2,745 | 4,015E-69  |
| TcCLB.503501.14  | mucin TcMUCII, putative                                 | -2,746 | 2,21E-29   |
| TcCLB.511183.430 | trans-sialidase, Group V, putative                      | -2,749 | 1,091E-41  |
| TcCLB.511885.20  | trans-sialidase, Group II, putative                     | -2,75  | 6,798E-87  |
| TcCLB.511149.30  | mucin TcMUCII (pseudogene), putative                    | -2,75  | 1,047E-21  |
| TcCLB.510693.240 | trans-sialidase, Group VI, putative                     | -2,753 | 8,754E-31  |
| TcCLB.508541.130 | mucin-associated surface protein (MASP), putative       | -2,754 | 1,121E-123 |
| TcCLB.506545.5   | mucin TcMUCl, putative                                  | -2,758 | 1,233E-53  |
| TcCLB.511511.6   | zinc finger protein ZFP1                                | -2,76  | 6,439E-19  |
| TcCLB.509653.10  | mucin-associated surface protein (MASP), putative       | -2,761 | 3,01E-17   |
| TcCLB.510805.5   | trans-sialidase, putative                               | -2,761 | 6,466E-17  |
| TcCLB.510021.100 | mucin TcMUCII, putative                                 | -2,762 | 2,515E-26  |
| TcCLB.508607.50  | trans-sialidase, Group II, putative                     | -2,764 | 1,605E-120 |
| TcCLB.508151.20  | mucin-associated surface protein (MASP), putative       | -2,764 | 7,377E-29  |
| TcCLB.508313.90  | mucin TcMUCII, putative                                 | -2,766 | 4,448E-65  |
| TcCLB.506133.80  | mucin-associated surface protein (MASP, pseudogene), pi | -2,766 | 4,555E-54  |
| TcCLB.505949.120 | mucin TcMUCII, putative                                 | -2,766 | 5,698E-29  |
| TcCLB.509905.200 | trans-sialidase, Group II, putative                     | -2,768 | 7,189E-216 |
| TcCLB.504239.420 | mucin-associated surface protein (MASP), putative       | -2,768 | 2,133E-52  |
| TcCLB.508365.280 | mucin TcMUCII, putative                                 | -2,768 | 3,115E-25  |
| TcCLB.511121.30  | hypothetical protein                                    | -2,769 | 5,939E-19  |
| TcCLB.511851.37  | mucin TcMUCl, putative                                  | -2,77  | 2,676E-52  |
| TcCLB.511185.120 | mucin-associated surface protein (MASP), putative       | -2,77  | 1,278E-36  |
| TcCLB.509581.10  | trans-sialidase, Group VII, putative                    | -2,771 | 5E-12      |
| TcCLB.511347.20  | mucin-associated surface protein (MASP, pseudogene), pi | -2,775 | 1,406E-113 |
| TcCLB.506139.80  | mucin TcMUCII, putative                                 | -2,776 | 2,91E-21   |
| TcCLB.506281.134 | mucin-associated surface protein (MASP), putative       | -2,776 | 1,312E-18  |

|                  |                                                          |        |            |
|------------------|----------------------------------------------------------|--------|------------|
| TcCLB.508101.9   | trans-sialidase, putative (fragment)                     | -2,778 | 1,264E-21  |
| TcCLB.506965.70  | mucin-associated surface protein (MASP), putative        | -2,78  | 2,206E-53  |
| TcCLB.507237.280 | mucin TcMUCII, putative                                  | -2,78  | 1,029E-06  |
| TcCLB.510303.10  | surface protease GP63, putative                          | -2,781 | 1,943E-93  |
| TcCLB.510363.80  | mucin-associated surface protein (MASP), putative        | -2,781 | 2,659E-19  |
| TcCLB.510557.50  | mucin TcMUCII, putative                                  | -2,782 | 8,119E-57  |
| TcCLB.510939.30  | mucin TcMUCI, putative                                   | -2,782 | 9,087E-39  |
| TcCLB.510843.19  | trans-sialidase, putative (fragment)                     | -2,783 | 2,344E-77  |
| TcCLB.509493.39  | mucin TcMUCII, putative                                  | -2,784 | 2,154E-84  |
| TcCLB.510487.79  | mucin-associated surface protein (MASP), putative        | -2,788 | 3,269E-23  |
| TcCLB.510557.10  | trans-sialidase (pseudogene), putative                   | -2,789 | 2,234E-85  |
| TcCLB.504015.11  | mucin-associated surface protein (MASP), putative (fragn | -2,791 | 1,573E-31  |
| TcCLB.440219.10  | trans-sialidase, putative (fragment)                     | -2,792 | 6,642E-129 |
| TcCLB.508999.110 | hypothetical protein                                     | -2,792 | 1,42E-11   |
| TcCLB.508307.180 | hypothetical protein, conserved                          | -2,793 | 2,325E-166 |
| TcCLB.504239.171 | mucin TcMUCII, putative                                  | -2,795 | 3,806E-27  |
| TcCLB.504239.240 | mucin-associated surface protein (MASP, pseudogene), pi  | -2,795 | 1,5E-11    |
| TcCLB.437805.9   | trans-sialidase (pseudogene), putative                   | -2,797 | 6,858E-11  |
| TcCLB.471467.10  | trans-sialidase, putative (fragment)                     | -2,798 | 1,253E-39  |
| TcCLB.511405.40  | mucin TcMUCII (pseudogene), putative                     | -2,798 | 1,115E-33  |
| TcCLB.506599.210 | mucin-associated surface protein (MASP), putative        | -2,801 | 7,107E-42  |
| TcCLB.508119.30  | mucin TcMUCII, putative                                  | -2,802 | 2,898E-95  |
| TcCLB.506973.5   | mucin-associated surface protein (MASP), putative        | -2,803 | 4,418E-19  |
| TcCLB.507957.160 | mucin-associated surface protein (MASP), putative        | -2,805 | 8,289E-48  |
| TcCLB.506767.400 | mucin-associated surface protein (MASP), putative        | -2,806 | 6,912E-27  |
| TcCLB.506241.30  | trans-sialidase, Group II, putative                      | -2,809 | 1,081E-47  |
| TcCLB.511849.20  | mucin TcMUCI, putative                                   | -2,81  | 1,049E-54  |
| TcCLB.511603.100 | mucin-associated surface protein (MASP), putative        | -2,811 | 1,159E-45  |
| TcCLB.507071.160 | mucin TcMUCII, putative                                  | -2,813 | 1,768E-26  |
| TcCLB.507879.10  | trans-sialidase, Group II, putative                      | -2,814 | 5,316E-146 |
| TcCLB.506289.110 | surface protease GP63 (pseudogene), putative             | -2,814 | 1,094E-110 |
| TcCLB.507487.10  | mucin TcMUCII, putative                                  | -2,814 | 6,858E-35  |
| TcCLB.510279.160 | trans-sialidase (pseudogene), putative                   | -2,814 | 2,402E-34  |
| TcCLB.511603.500 | mucin-associated surface protein (MASP), putative        | -2,815 | 7,604E-21  |
| TcCLB.510587.20  | mucin-associated surface protein (MASP, pseudogene), pi  | -2,816 | 1,781E-19  |
| TcCLB.508857.130 | hypothetical protein, conserved                          | -2,82  | 1,129E-93  |
| TcCLB.506149.20  | hypothetical protein, conserved                          | -2,822 | 4,668E-54  |
| TcCLB.507163.50  | mucin TcMUCII, putative                                  | -2,822 | 2,013E-31  |
| TcCLB.511089.80  | trans-sialidase, Group V, putative                       | -2,823 | 3,842E-36  |
| TcCLB.509753.240 | mucin TcMUCII, putative                                  | -2,825 | 6,783E-15  |
| TcCLB.506703.90  | trans-sialidase, Group VI, putative                      | -2,828 | 2,814E-31  |
| TcCLB.510025.220 | mucin-associated surface protein (MASP), putative        | -2,83  | 2,656E-35  |
| TcCLB.508367.20  | UDP-Gal or UDP-GlcNAc-dependent glycosyltransferase, p   | -2,83  | 6,481E-35  |
| TcCLB.511839.20  | mucin-associated surface protein (MASP), putative        | -2,831 | 8,381E-12  |
| TcCLB.509993.10  | mucin TcMUCI, putative                                   | -2,832 | 3,289E-31  |

|                  |                                                          |        |            |
|------------------|----------------------------------------------------------|--------|------------|
| TcCLB.506289.170 | surface protease GP63, putative                          | -2,834 | 3,653E-71  |
| TcCLB.511405.10  | mucin TcMUCI, putative                                   | -2,834 | 6,086E-20  |
| TcCLB.509495.49  | mucin TcMUCII, putative                                  | -2,836 | 2,376E-90  |
| TcCLB.510475.100 | mucin-associated surface protein (MASP), putative        | -2,836 | 6,384E-83  |
| TcCLB.506813.29  | mucin-associated surface protein (MASP), putative        | -2,837 | 2,237E-16  |
| TcCLB.506799.130 | mucin-associated surface protein (MASP), putative        | -2,838 | 6,65E-74   |
| TcCLB.508245.70  | mucin-associated surface protein (MASP), putative        | -2,839 | 4,124E-41  |
| TcCLB.510047.120 | mucin-associated surface protein (MASP), putative        | -2,841 | 1,272E-29  |
| TcCLB.506599.150 | mucin-associated surface protein (MASP), putative        | -2,844 | 2,329E-51  |
| TcCLB.507071.60  | mucin TcMUCII, putative                                  | -2,844 | 7,563E-21  |
| TcCLB.509545.10  | mucin-associated surface protein (MASP), putative        | -2,845 | 2,646E-87  |
| TcCLB.511413.19  | trans-sialidase, putative                                | -2,846 | 4,816E-85  |
| TcCLB.508165.14  | trans-sialidase, putative (fragment)                     | -2,847 | 3,821E-14  |
| TcCLB.510477.90  | mucin TcMUCII, putative                                  | -2,849 | 5,479E-18  |
| TcCLB.511233.130 | mucin-associated surface protein (MASP), putative        | -2,849 | 4,058E-14  |
| TcCLB.507429.49  | mucin TcMUCII, putative                                  | -2,85  | 1,402E-46  |
| TcCLB.505025.30  | mucin TcMUCII, putative                                  | -2,85  | 2,841E-30  |
| TcCLB.508053.10  | trans-sialidase, putative                                | -2,85  | 1,784E-13  |
| TcCLB.508401.10  | trans-sialidase, putative                                | -2,852 | 2,053E-38  |
| TcCLB.510359.550 | mucin-associated surface protein (MASP), putative        | -2,855 | 4,616E-26  |
| TcCLB.504197.5   | mucin-associated surface protein (MASP), putative (fragm | -2,855 | 1,702E-10  |
| TcCLB.506409.100 | mucin TcMUCII, putative                                  | -2,856 | 9,007E-44  |
| TcCLB.504239.350 | mucin-associated surface protein (MASP), putative        | -2,857 | 1,485E-106 |
| TcCLB.506499.210 | mucin-associated surface protein (MASP), putative        | -2,857 | 3,19E-85   |
| TcCLB.506955.70  | mucin-associated surface protein (MASP), putative        | -2,858 | 1,946E-70  |
| TcCLB.506965.190 | mucin TcMUCII, putative                                  | -2,858 | 1,113E-16  |
| TcCLB.511233.160 | hypothetical protein                                     | -2,859 | 6,822E-53  |
| TcCLB.506409.50  | mucin TcMUCII, putative                                  | -2,859 | 1,77E-45   |
| TcCLB.511921.140 | mucin-associated surface protein (MASP), putative        | -2,86  | 3,108E-20  |
| TcCLB.508995.10  | protein kinase, putative                                 | -2,866 | 2,993E-123 |
| TcCLB.508147.70  | trans-sialidase (pseudogene), putative                   | -2,866 | 9,624E-24  |
| TcCLB.474079.10  | trans-sialidase, putative                                | -2,867 | 2,273E-117 |
| TcCLB.508247.110 | serine-alanine-and proline-rich protein, putative        | -2,87  | 3,438E-48  |
| TcCLB.473709.10  | trans-sialidase, putative (fragment)                     | -2,87  | 3,147E-13  |
| TcCLB.506309.60  | trans-sialidase, Group V, putative                       | -2,87  | 4,037E-11  |
| TcCLB.505025.130 | mucin-associated surface protein (MASP), putative        | -2,871 | 2,433E-24  |
| TcCLB.506761.11  | mucin-associated surface protein (MASP), putative (fragm | -2,871 | 1,796E-18  |
| TcCLB.508759.10  | mucin-associated surface protein (MASP), putative        | -2,872 | 9,359E-23  |
| TcCLB.418405.30  | trans-sialidase, putative                                | -2,872 | 2,123E-09  |
| TcCLB.510961.30  | mucin-associated surface protein (MASP), putative        | -2,875 | 6,171E-58  |
| TcCLB.506409.170 | trans-sialidase, Group VI, putative                      | -2,876 | 6,46E-132  |
| TcCLB.504081.90  | mucin-associated surface protein (MASP), putative        | -2,88  | 4,444E-53  |
| TcCLB.507957.60  | mucin-associated surface protein (MASP, pseudogene), pu  | -2,88  | 4,634E-37  |
| TcCLB.506785.14  | mucin-associated surface protein (MASP), putative        | -2,88  | 5,881E-23  |
| TcCLB.447847.10  | trans-sialidase (pseudogene), putative                   | -2,88  | 5,473E-22  |

|                  |                                                        |        |            |
|------------------|--------------------------------------------------------|--------|------------|
| TcCLB.510831.21  | trans-sialidase, putative (fragment)                   | -2,88  | 9,625E-12  |
| TcCLB.511671.20  | trans-sialidase (pseudogene), putative                 | -2,881 | 1,337E-71  |
| TcCLB.507071.340 | hypothetical protein                                   | -2,884 | 3,902E-50  |
| TcCLB.508219.50  | mucin TcMUCII, putative                                | -2,884 | 1,395E-18  |
| TcCLB.510197.80  | hypothetical protein, conserved                        | -2,887 | 1,288E-67  |
| TcCLB.511063.100 | trans-sialidase (pseudogene), putative                 | -2,887 | 1,978E-37  |
| TcCLB.509925.10  | mucin-associated surface protein (MASP), putative      | -2,889 | 2,597E-69  |
| TcCLB.510021.50  | mucin-associated surface protein (MASP), putative      | -2,891 | 2,554E-33  |
| TcCLB.504405.10  | dispersed gene family protein 1 (DGF-1), putative      | -2,891 | 1,083E-06  |
| TcCLB.510483.220 | mucin-associated surface protein (MASP), putative      | -2,893 | 6,038E-64  |
| TcCLB.471799.10  | trans-sialidase, putative (fragment)                   | -2,893 | 2,812E-45  |
| TcCLB.506501.390 | mucin TcMUCII, putative                                | -2,896 | 1,536E-22  |
| TcCLB.506001.14  | mucin-associated surface protein (MASP), putative      | -2,897 | 1,577E-34  |
| TcCLB.506965.180 | mucin-associated surface protein (MASP), putative      | -2,897 | 8,3E-15    |
| TcCLB.504985.20  | UDP-Gal or UDP-GlcNAc-dependent glycosyltransferase, p | -2,899 | 1,014E-43  |
| TcCLB.510201.20  | mucin-associated surface protein (MASP), putative      | -2,904 | 9,513E-34  |
| TcCLB.506767.70  | mucin-associated surface protein (MASP), putative      | -2,906 | 2,225E-47  |
| TcCLB.506847.50  | trans-sialidase (pseudogene), putative                 | -2,906 | 6,165E-08  |
| TcCLB.506939.110 | mucin-associated surface protein (MASP), putative      | -2,907 | 1,005E-36  |
| TcCLB.506131.20  | mucin TcMUCII, putative                                | -2,907 | 7,145E-20  |
| TcCLB.511923.80  | mucin-associated surface protein (MASP, pseudogene), p | -2,907 | 3,233E-14  |
| TcCLB.415273.9   | mucin TcMUCII (pseudogene), putative                   | -2,909 | 9,828E-15  |
| TcCLB.509477.10  | mucin-associated surface protein (MASP), putative      | -2,909 | 6,991E-07  |
| TcCLB.510805.70  | mucin TcMUCII, putative                                | -2,91  | 2,898E-23  |
| TcCLB.506229.50  | nucleoside phosphatase, putative                       | -2,913 | 3,13E-199  |
| TcCLB.506291.31  | surface protease GP63 (pseudogene), putative           | -2,913 | 4,673E-32  |
| TcCLB.510021.30  | mucin TcMUCII, putative                                | -2,916 | 2,173E-30  |
| TcCLB.506289.140 | surface protease GP63, putative                        | -2,917 | 2,487E-106 |
| TcCLB.504239.290 | mucin-associated surface protein (MASP), putative      | -2,917 | 1,075E-59  |
| TcCLB.507633.40  | mucin TcMUCII, putative                                | -2,918 | 3,861E-109 |
| TcCLB.509665.30  | trans-sialidase, Group V, putative                     | -2,92  | 5,462E-42  |
| TcCLB.508595.11  | hypothetical protein                                   | -2,92  | 6,068E-15  |
| TcCLB.509875.30  | trans-sialidase (pseudogene), putative                 | -2,921 | 1,07E-52   |
| TcCLB.508939.30  | mucin-associated surface protein (MASP), putative      | -2,921 | 2,143E-35  |
| TcCLB.510377.70  | mucin TcMUCII, putative                                | -2,922 | 9,037E-09  |
| TcCLB.504249.30  | mucin-associated surface protein (MASP), putative      | -2,923 | 4,829E-43  |
| TcCLB.508261.50  | mucin-associated surface protein (MASP), putative      | -2,923 | 6,077E-40  |
| TcCLB.511173.160 | trans-sialidase (pseudogene), putative                 | -2,927 | 1,643E-44  |
| TcCLB.509993.60  | mucin TcMUCI, putative                                 | -2,928 | 6,168E-30  |
| TcCLB.511487.150 | serine-alanine-and proline-rich protein, putative      | -2,928 | 3,249E-29  |
| TcCLB.507957.334 | mucin-associated surface protein (MASP), putative      | -2,928 | 2,68E-07   |
| TcCLB.507091.60  | trans-sialidase, Group V, putative                     | -2,931 | 1,612E-65  |
| TcCLB.510377.430 | mucin-associated surface protein (MASP), putative      | -2,932 | 8,659E-42  |
| TcCLB.510371.120 | mucin-associated surface protein (MASP), putative      | -2,933 | 1,689E-37  |
| TcCLB.507747.170 | mucin-associated surface protein (MASP), putative      | -2,934 | 1,929E-105 |

|                  |                                                               |        |            |
|------------------|---------------------------------------------------------------|--------|------------|
| TcCLB.409625.10  | trans-sialidase, putative (fragment)                          | -2,935 | 4,45E-40   |
| TcCLB.508499.10  | mucin TcMUCII, putative                                       | -2,936 | 1,014E-61  |
| TcCLB.506769.80  | mucin-associated surface protein (MASP), putative             | -2,936 | 1,025E-59  |
| TcCLB.508157.40  | hypothetical protein                                          | -2,939 | 7,712E-51  |
| TcCLB.503827.100 | trans-sialidase, Group VI, putative                           | -2,939 | 6,557E-25  |
| TcCLB.509957.20  | expression site-associated gene (ESAG-like) protein, putative | -2,941 | 2,2E-19    |
| TcCLB.503659.30  | trans-sialidase, putative                                     | -2,943 | 6,113E-44  |
| TcCLB.509867.20  | mucin-associated surface protein (MASP), putative             | -2,943 | 6,662E-15  |
| TcCLB.511183.350 | surface protease GP63 (pseudogene), putative                  | -2,946 | 1,361E-44  |
| TcCLB.509493.20  | mucin TcMUCII, putative                                       | -2,947 | 1,893E-67  |
| TcCLB.507747.160 | mucin TcMUCII, putative                                       | -2,947 | 1,764E-57  |
| TcCLB.509287.100 | mucin TcMUCII, putative                                       | -2,949 | 1,305E-96  |
| TcCLB.508227.20  | mucin-associated surface protein (MASP), putative             | -2,95  | 1,237E-70  |
| TcCLB.506499.190 | 90 kDa surface protein, putative                              | -2,951 | 9,329E-42  |
| TcCLB.506409.90  | mucin-associated surface protein (MASP), putative             | -2,953 | 1,94E-21   |
| TcCLB.509217.160 | complement regulatory protein, putative                       | -2,957 | 1,007E-40  |
| TcCLB.503679.10  | aspartate aminotransferase, putative                          | -2,958 | 6,519E-76  |
| TcCLB.509697.29  | hypothetical protein                                          | -2,958 | 8,859E-15  |
| TcCLB.510365.10  | trans-sialidase (pseudogene), putative                        | -2,959 | 3,356E-22  |
| TcCLB.506885.280 | NIMA-related kinase, putative                                 | -2,962 | 3,55E-57   |
| TcCLB.503977.40  | mucin TcMUCII, putative                                       | -2,962 | 1,017E-38  |
| TcCLB.504239.110 | mucin-associated surface protein (MASP), putative             | -2,967 | 1,197E-36  |
| TcCLB.453767.50  | mucin-associated surface protein (MASP), putative             | -2,967 | 3,883E-36  |
| TcCLB.506477.60  | protein kinase, putative                                      | -2,968 | 9,331E-248 |
| TcCLB.508163.140 | mucin-associated surface protein (MASP), putative             | -2,971 | 7,888E-99  |
| TcCLB.510475.40  | mucin TcMUCII, putative                                       | -2,973 | 7,302E-17  |
| TcCLB.508963.30  | trans-sialidase, Group VIII, putative                         | -2,975 | 7,519E-90  |
| TcCLB.504239.434 | trans-sialidase, putative (fragment)                          | -2,977 | 8,892E-22  |
| TcCLB.511173.140 | hypothetical protein                                          | -2,978 | 1,417E-13  |
| TcCLB.510371.10  | mucin-associated surface protein (MASP), putative             | -2,979 | 1,11E-47   |
| TcCLB.510013.290 | mucin-associated surface protein (MASP), putative             | -2,979 | 3,475E-24  |
| TcCLB.507959.310 | mucin TcMUCII, putative                                       | -2,98  | 4,587E-35  |
| TcCLB.507145.70  | mucin-associated surface protein (MASP, pseudogene), putative | -2,98  | 4,201E-16  |
| TcCLB.506741.80  | mucin TcMUCII, putative                                       | -2,982 | 7,423E-20  |
| TcCLB.508761.20  | mucin TcMUCII, putative                                       | -2,984 | 4,204E-71  |
| TcCLB.510643.100 | trans-sialidase (pseudogene), putative                        | -2,985 | 2,636E-08  |
| TcCLB.510275.255 | hypothetical protein                                          | -2,986 | 2,278E-18  |
| TcCLB.506769.40  | hypothetical protein                                          | -2,987 | 1,329E-17  |
| TcCLB.506451.80  | mucin-associated surface protein (MASP, pseudogene), putative | -2,988 | 1,165E-98  |
| TcCLB.510191.20  | mucin TcMUCII, putative                                       | -2,988 | 1,912E-21  |
| TcCLB.506501.230 | mucin TcMUCII, putative                                       | -2,988 | 5,717E-15  |
| TcCLB.508429.20  | mucin-like glycoprotein, putative                             | -2,989 | 3,755E-29  |
| TcCLB.510191.70  | mucin-associated surface protein (MASP), putative             | -2,99  | 4,949E-30  |
| TcCLB.503769.20  | trans-sialidase (pseudogene), putative                        | -2,991 | 1,536E-41  |
| TcCLB.509493.110 | mucin TcMUCII, putative                                       | -2,993 | 1,32E-78   |

|                  |                                                          |        |           |
|------------------|----------------------------------------------------------|--------|-----------|
| TcCLB.509531.10  | trans-sialidase, putative (fragment)                     | -2,994 | 3,123E-47 |
| TcCLB.408825.5   | mucin-associated surface protein (MASP), putative (fragm | -2,995 | 1,347E-30 |
| TcCLB.506067.240 | mucin-associated surface protein (MASP), putative        | -2,995 | 2,089E-17 |
| TcCLB.504239.280 | 90 kDa surface protein, putative                         | -2,999 | 3,405E-34 |
| TcCLB.506763.90  | mucin-associated surface protein (MASP, pseudogene), pi  | -2,999 | 1,392E-21 |
| TcCLB.507959.250 | mucin TcMUCII, putative                                  | -3     | 2,025E-23 |
| TcCLB.506741.100 | trans-sialidase, Group V, putative                       | -3,001 | 8,674E-33 |
| TcCLB.511087.19  | trans-sialidase, putative (fragment)                     | -3,002 | 5,187E-29 |
| TcCLB.506321.200 | mucin-associated surface protein (MASP), putative        | -3,003 | 3,119E-32 |
| TcCLB.508433.220 | mucin-associated surface protein (MASP), putative        | -3,003 | 2,137E-27 |
| TcCLB.511923.10  | mucin-associated surface protein (MASP, pseudogene), pi  | -3,003 | 2,425E-08 |
| TcCLB.510373.90  | mucin-associated surface protein (MASP), putative        | -3,005 | 3,462E-48 |
| TcCLB.510553.40  | trans-sialidase, Group V, putative                       | -3,006 | 1,837E-55 |
| TcCLB.506955.250 | mucin TcMUCII, putative                                  | -3,007 | 2,047E-48 |
| TcCLB.511849.10  | mucin TcMUCI, putative                                   | -3,008 | 1,187E-58 |
| TcCLB.507637.100 | mucin TcMUCII, putative                                  | -3,009 | 9,917E-41 |
| TcCLB.510197.20  | mucin-associated surface protein (MASP), putative        | -3,01  | 2,455E-95 |
| TcCLB.508161.50  | trans-sialidase, putative                                | -3,01  | 2,88E-39  |
| TcCLB.510261.41  | mucin TcMUC (pseudogene), putative                       | -3,011 | 4,251E-16 |
| TcCLB.509699.220 | trans-sialidase (pseudogene), putative                   | -3,013 | 1,142E-89 |
| TcCLB.508247.80  | mucin-associated surface protein (MASP), putative        | -3,014 | 3,079E-27 |
| TcCLB.504911.20  | mucin-associated surface protein (MASP, pseudogene), pi  | -3,014 | 1,871E-09 |
| TcCLB.507957.270 | mucin TcMUCI, putative                                   | -3,015 | 2,833E-46 |
| TcCLB.509905.170 | trans-sialidase, Group VIII, putative                    | -3,02  | 3,508E-79 |
| TcCLB.506499.105 | mucin-associated surface protein (MASP, pseudogene), pi  | -3,02  | 1,779E-37 |
| TcCLB.505567.31  | mucin-associated surface protein (MASP, pseudogene), pi  | -3,021 | 3,957E-11 |
| TcCLB.510503.160 | mucin TcMUCII, putative                                  | -3,022 | 2,821E-75 |
| TcCLB.507071.120 | mucin-associated surface protein (MASP), putative        | -3,022 | 6,676E-50 |
| TcCLB.508541.80  | mucin TcMUCII, putative                                  | -3,029 | 8,085E-47 |
| TcCLB.508277.170 | hypothetical protein, conserved                          | -3,03  | 6,459E-89 |
| TcCLB.508853.30  | hypothetical protein                                     | -3,03  | 3,113E-55 |
| TcCLB.510875.10  | dispersed gene family protein 1 (DGF-1, pseudogene), put | -3,03  | 1,144E-19 |
| TcCLB.506599.280 | mucin-associated surface protein (MASP, pseudogene), pi  | -3,031 | 1,806E-28 |
| TcCLB.510201.5   | mucin-associated surface protein (MASP), putative        | -3,033 | 3,274E-13 |
| TcCLB.507957.320 | mucin-associated surface protein (MASP), putative        | -3,038 | 2,175E-63 |
| TcCLB.508245.60  | mucin TcMUCII, putative                                  | -3,04  | 4,131E-29 |
| TcCLB.511547.40  | retrotransposon hot spot protein (RHS, pseudogene), puta | -3,042 | 2,398E-73 |
| TcCLB.510627.110 | mucin-associated surface protein (MASP), putative        | -3,042 | 3,218E-08 |
| TcCLB.511211.190 | hypothetical protein                                     | -3,044 | 1,323E-97 |
| TcCLB.511487.170 | mucin-associated surface protein (MASP), putative        | -3,047 | 1,203E-64 |
| TcCLB.509525.60  | mucin TcMUCII, putative                                  | -3,048 | 1,212E-15 |
| TcCLB.510961.10  | mucin-associated surface protein (MASP), putative        | -3,049 | 2,254E-60 |
| TcCLB.506329.70  | mucin TcMUCII, putative                                  | -3,051 | 2,281E-19 |
| TcCLB.508633.20  | trans-sialidase, Group V, putative                       | -3,052 | 3,949E-32 |
| TcCLB.506309.70  | mucin-associated surface protein (MASP), putative        | -3,055 | 4,851E-27 |

|                  |                                                          |        |            |
|------------------|----------------------------------------------------------|--------|------------|
| TcCLB.506813.5   | hypothetical protein                                     | -3,056 | 2,446E-72  |
| TcCLB.398265.9   | trans-sialidase, putative                                | -3,056 | 5,453E-19  |
| TcCLB.510279.10  | trans-sialidase (pseudogene), putative                   | -3,059 | 2,438E-32  |
| TcCLB.510557.60  | mucin-associated surface protein (MASP), putative        | -3,06  | 4,797E-24  |
| TcCLB.511259.220 | mucin-associated surface protein (MASP), putative        | -3,063 | 4,081E-54  |
| TcCLB.505025.137 | mucin TcMUCII, putative                                  | -3,063 | 6,48E-18   |
| TcCLB.508603.10  | trans-sialidase, putative                                | -3,064 | 2,033E-38  |
| TcCLB.511553.160 | 90 kDa surface protein, putative                         | -3,065 | 4,17E-32   |
| TcCLB.506245.220 | mucin TcMUCII, putative                                  | -3,07  | 1,261E-28  |
| TcCLB.509545.79  | mucin-associated surface protein (MASP), putative        | -3,071 | 1,705E-49  |
| TcCLB.509419.20  | mucin-associated surface protein (MASP), putative        | -3,076 | 7,456E-14  |
| TcCLB.504393.30  | trans-sialidase (pseudogene), putative                   | -3,077 | 5,1E-63    |
| TcCLB.507803.10  | mucin-associated surface protein (MASP), putative        | -3,079 | 1,611E-69  |
| TcCLB.506599.310 | mucin-associated surface protein (MASP), putative        | -3,079 | 2,646E-21  |
| TcCLB.508163.280 | mucin TcMUCII, putative                                  | -3,08  | 1,926E-39  |
| TcCLB.506053.50  | trans-sialidase, Group IV, putative                      | -3,081 | 6,923E-73  |
| TcCLB.506893.10  | mucin TcMUCII, putative                                  | -3,081 | 5,046E-26  |
| TcCLB.506409.140 | mucin TcMUCII, putative                                  | -3,081 | 1,15E-14   |
| TcCLB.399685.10  | trans-sialidase, putative (fragment)                     | -3,082 | 9,802E-63  |
| TcCLB.511183.560 | mucin-associated surface protein (MASP), putative        | -3,085 | 3,633E-47  |
| TcCLB.508427.40  | mucin-associated surface protein (MASP), putative        | -3,087 | 3,234E-72  |
| TcCLB.504239.340 | mucin TcMUCII, putative                                  | -3,087 | 6,735E-35  |
| TcCLB.503429.30  | mucin-associated surface protein (MASP), putative        | -3,088 | 1,019E-42  |
| TcCLB.511839.40  | trans-sialidase, Group V, putative                       | -3,09  | 4,046E-47  |
| TcCLB.505949.20  | mucin-associated surface protein (MASP), putative        | -3,092 | 5,114E-49  |
| TcCLB.510021.120 | trans-sialidase, Group V, putative                       | -3,092 | 4,512E-23  |
| TcCLB.511613.60  | mucin-associated surface protein (MASP), putative        | -3,093 | 7,389E-101 |
| TcCLB.509081.5   | mucin-associated surface protein (MASP), putative        | -3,093 | 2,159E-37  |
| TcCLB.505025.80  | hypothetical protein, conserved                          | -3,094 | 6,594E-166 |
| TcCLB.510377.400 | mucin TcMUCII, putative                                  | -3,097 | 1,266E-40  |
| TcCLB.507085.60  | mucin TcMUCII, putative                                  | -3,101 | 2,24E-74   |
| TcCLB.504787.30  | mucin-associated surface protein (MASP), putative        | -3,101 | 1,209E-20  |
| TcCLB.464391.10  | retrotransposon hot spot protein (RHS, pseudogene), puta | -3,105 | 2,029E-14  |
| TcCLB.510237.70  | mucin-associated surface protein (MASP), putative        | -3,106 | 3,297E-44  |
| TcCLB.510917.9   | mucin-associated surface protein (MASP), putative        | -3,111 | 5,05E-44   |
| TcCLB.506741.130 | trans-sialidase, Group V, putative                       | -3,115 | 2,183E-32  |
| TcCLB.508841.10  | surface antigen TASV-A4 (TASV-A4)                        | -3,116 | 1,432E-196 |
| TcCLB.466325.10  | trans-sialidase (pseudogene), putative                   | -3,116 | 2,098E-29  |
| TcCLB.509493.80  | mucin TcMUCII, putative                                  | -3,117 | 5,542E-149 |
| TcCLB.506611.20  | mucin TcMUCII, putative                                  | -3,117 | 5,774E-26  |
| TcCLB.504183.20  | trans-sialidase, Group II, putative                      | -3,118 | 1,098E-122 |
| TcCLB.479481.10  | mucin-associated surface protein (MASP), putative (fragn | -3,118 | 8,488E-31  |
| TcCLB.506951.80  | trans-sialidase, Group V, putative                       | -3,119 | 1,517E-99  |
| TcCLB.507069.150 | mucin-associated surface protein (MASP), putative        | -3,119 | 1,329E-51  |
| TcCLB.508293.80  | mucin-associated surface protein (MASP), putative        | -3,119 | 8,696E-34  |



|                  |                                                               |        |            |
|------------------|---------------------------------------------------------------|--------|------------|
| TcCLB.506501.170 | mucin TcMUCII, putative                                       | -3,121 | 1,484E-24  |
| TcCLB.510483.120 | mucin-associated surface protein (MASP), putative             | -3,123 | 1,216E-28  |
| TcCLB.457979.10  | mucin-associated surface protein (MASP), putative             | -3,124 | 2,63E-22   |
| TcCLB.506453.10  | trans-sialidase, putative                                     | -3,126 | 6,136E-50  |
| TcCLB.511063.140 | trans-sialidase (pseudogene), putative                        | -3,126 | 3,166E-29  |
| TcCLB.503875.10  | mucin-associated surface protein (MASP), putative             | -3,127 | 5,889E-20  |
| TcCLB.511775.21  | mitochondrial RNA editing ligase 1 (pseudogene), putative     | -3,127 | 4,144E-10  |
| TcCLB.511553.90  | mucin TcMUCII, putative                                       | -3,128 | 1,095E-70  |
| TcCLB.510419.20  | trans-sialidase, Group VI, putative                           | -3,129 | 8,685E-45  |
| TcCLB.508883.48  | trans-sialidase, putative                                     | -3,131 | 8,391E-92  |
| TcCLB.508013.40  | trans-sialidase, Group VI, putative                           | -3,131 | 3,971E-59  |
| TcCLB.508229.10  | trans-sialidase, putative                                     | -3,131 | 1,166E-24  |
| TcCLB.509483.10  | surface protease GP63, putative                               | -3,133 | 2,534E-15  |
| TcCLB.506309.130 | trans-sialidase (pseudogene), putative                        | -3,134 | 5,663E-16  |
| TcCLB.510025.180 | mucin-associated surface protein (MASP), putative             | -3,138 | 2,146E-66  |
| TcCLB.459793.10  | mucin TcMUCl, putative                                        | -3,138 | 3,018E-32  |
| TcCLB.506809.10  | trans-sialidase (pseudogene), putative                        | -3,14  | 3,188E-96  |
| TcCLB.511183.260 | mucin-associated surface protein (MASP), putative             | -3,141 | 1,656E-49  |
| TcCLB.510307.10  | surface protease GP63, putative                               | -3,145 | 2,02E-19   |
| TcCLB.506245.302 | mucin-associated surface protein (MASP), putative             | -3,146 | 1,555E-74  |
| TcCLB.504039.240 | mucin TcMUCII, putative                                       | -3,146 | 1,077E-47  |
| TcCLB.511911.60  | trans-sialidase, Group III, putative                          | -3,146 | 1,169E-07  |
| TcCLB.510013.240 | mucin TcMUCII, putative                                       | -3,147 | 1,142E-22  |
| TcCLB.509753.300 | mucin TcMUCII, putative                                       | -3,147 | 1,097E-20  |
| TcCLB.510021.80  | 90 kDa surface protein, putative                              | -3,148 | 3,687E-45  |
| TcCLB.511099.190 | mucin-associated surface protein (MASP), putative             | -3,149 | 2,653E-56  |
| TcCLB.510305.9   | Present in the outer mitochondrial membrane proteome          | -3,153 | 3,13E-127  |
| TcCLB.509979.174 | mucin-associated surface protein (MASP), putative             | -3,155 | 1,767E-79  |
| TcCLB.506667.10  | mucin-associated surface protein (MASP), putative             | -3,156 | 1,567E-19  |
| TcCLB.511079.40  | surface protease GP63 (pseudogene), putative                  | -3,156 | 6,125E-18  |
| TcCLB.504233.70  | mucin TcMUCl, putative                                        | -3,157 | 3,435E-25  |
| TcCLB.511555.10  | mucin-associated surface protein (MASP), putative             | -3,159 | 2,171E-89  |
| TcCLB.506967.60  | trans-sialidase, Group VI, putative                           | -3,16  | 2,024E-54  |
| TcCLB.510093.10  | ATPase, putative                                              | -3,16  | 1,386E-20  |
| TcCLB.510697.60  | mucin-associated surface protein (MASP), putative             | -3,161 | 8,809E-81  |
| TcCLB.503783.80  | mucin-associated surface protein (MASP), putative             | -3,161 | 9,306E-76  |
| TcCLB.510715.64  | mucin-associated surface protein (MASP), putative             | -3,161 | 2,055E-25  |
| TcCLB.511597.10  | trans-sialidase, putative                                     | -3,161 | 1,533E-15  |
| TcCLB.507281.19  | retrotransposon hot spot protein (RHS, pseudogene), putative  | -3,162 | 1,012E-52  |
| TcCLB.506569.50  | expression site-associated gene (ESAG-like) protein, putative | -3,164 | 8,716E-18  |
| TcCLB.483183.10  | trans-sialidase, putative (fragment)                          | -3,169 | 6,186E-19  |
| TcCLB.508125.100 | mucin TcMUCII, putative                                       | -3,17  | 1,035E-09  |
| TcCLB.510377.260 | mucin-associated surface protein (MASP), putative             | -3,173 | 1,029E-17  |
| TcCLB.511645.21  | mucin TcMUCII, putative                                       | -3,175 | 1,503E-103 |
| TcCLB.507429.10  | mucin TcMUCII (pseudogene), putative                          | -3,177 | 2,578E-87  |

|                  |                                                         |        |            |
|------------------|---------------------------------------------------------|--------|------------|
| TcCLB.510025.170 | mucin TcMUCII, putative                                 | -3,177 | 1,626E-53  |
| TcCLB.510621.20  | mucin-associated surface protein (MASP), putative       | -3,181 | 1,942E-44  |
| TcCLB.507699.120 | mucin TcMUCII, putative                                 | -3,182 | 7,339E-37  |
| TcCLB.505025.70  | mucin-associated surface protein (MASP), putative       | -3,183 | 5,551E-72  |
| TcCLB.506157.40  | trans-sialidase, putative                               | -3,185 | 1,138E-65  |
| TcCLB.511255.50  | mucin-associated surface protein (MASP), putative       | -3,188 | 5,403E-69  |
| TcCLB.503645.40  | mucin-associated surface protein (MASP), putative       | -3,188 | 6,956E-40  |
| TcCLB.506955.14  | mucin-associated surface protein (MASP, pseudogene), pi | -3,189 | 1,425E-67  |
| TcCLB.430567.10  | trans-sialidase, putative (fragment)                    | -3,19  | 1,027E-86  |
| TcCLB.507997.14  | trans-sialidase, putative (fragment)                    | -3,194 | 2,225E-94  |
| TcCLB.506741.120 | mucin-associated surface protein (MASP), putative       | -3,2   | 2,008E-45  |
| TcCLB.510275.272 | hypothetical protein                                    | -3,2   | 6,425E-43  |
| TcCLB.510163.30  | mucin-associated surface protein (MASP), putative       | -3,201 | 5,368E-202 |
| TcCLB.506501.184 | mucin-associated surface protein (MASP, pseudogene), pi | -3,202 | 4,5E-29    |
| TcCLB.511609.30  | mucin-associated surface protein (MASP), putative       | -3,205 | 1,07E-22   |
| TcCLB.506965.130 | mucin-associated surface protein (MASP), putative       | -3,206 | 2,486E-111 |
| TcCLB.507907.10  | trans-sialidase, putative                               | -3,208 | 1,279E-24  |
| TcCLB.508309.5   | trans-sialidase, putative (fragment)                    | -3,209 | 4,439E-26  |
| TcCLB.508125.149 | trans-sialidase, putative (fragment)                    | -3,213 | 2,147E-77  |
| TcCLB.510371.130 | mucin TcMUCII, putative                                 | -3,215 | 2,531E-29  |
| TcCLB.507091.80  | mucin-associated surface protein (MASP), putative       | -3,215 | 4,585E-25  |
| TcCLB.504341.10  | trans-sialidase, Group IV, putative                     | -3,216 | 1,551E-131 |
| TcCLB.509081.100 | mucin TcMUCII, putative                                 | -3,217 | 2,089E-71  |
| TcCLB.504039.57  | mucin-associated surface protein (MASP, pseudogene), pi | -3,219 | 5,283E-10  |
| TcCLB.508789.150 | mucin-associated surface protein (MASP), putative       | -3,22  | 5,389E-78  |
| TcCLB.506973.90  | mucin-associated surface protein (MASP, pseudogene), pi | -3,221 | 3,191E-80  |
| TcCLB.510715.40  | mucin-associated surface protein (MASP), putative       | -3,222 | 2,37E-33   |
| TcCLB.508887.20  | mucin TcMUCII, putative                                 | -3,223 | 2,134E-47  |
| TcCLB.506951.90  | trans-sialidase, Group IV, putative                     | -3,224 | 6,829E-133 |
| TcCLB.507237.89  | mucin TcMUCII, putative                                 | -3,226 | 9,597E-16  |
| TcCLB.510213.80  | mucin TcMUCII, putative                                 | -3,227 | 3,825E-33  |
| TcCLB.505997.80  | trans-sialidase, Group VIII, putative                   | -3,23  | 2,493E-103 |
| TcCLB.506501.50  | mucin-associated surface protein (MASP, pseudogene), pi | -3,23  | 5,338E-37  |
| TcCLB.508429.40  | mucin-associated surface protein (MASP, pseudogene), pi | -3,234 | 5,309E-31  |
| TcCLB.510411.40  | trans-sialidase, putative                               | -3,236 | 2,934E-50  |
| TcCLB.506331.50  | trans-sialidase (pseudogene), putative                  | -3,239 | 2,066E-59  |
| TcCLB.422867.10  | trans-sialidase, Group II, putative                     | -3,239 | 1,021E-31  |
| TcCLB.506599.430 | mucin TcMUCII, putative                                 | -3,241 | 1,71E-43   |
| TcCLB.508873.580 | mucin-associated surface protein (MASP), putative       | -3,243 | 5,659E-42  |
| TcCLB.506139.100 | mucin TcMUCII, putative                                 | -3,243 | 9,122E-41  |
| TcCLB.511643.50  | mucin-associated surface protein (MASP, pseudogene), pi | -3,244 | 1,116E-61  |
| TcCLB.509731.10  | poly-zinc finger protein 2, putative                    | -3,244 | 8,55E-34   |
| TcCLB.506139.70  | mucin-associated surface protein (MASP), putative       | -3,25  | 1,747E-42  |
| TcCLB.509525.100 | trans-sialidase (pseudogene), putative                  | -3,252 | 1,674E-57  |
| TcCLB.503973.70  | serine-alanine-and proline-rich protein, putative       | -3,253 | 5,651E-71  |

|                  |                                                         |        |            |
|------------------|---------------------------------------------------------|--------|------------|
| TcCLB.508375.10  | mucin-associated surface protein (MASP), putative       | -3,254 | 5,444E-92  |
| TcCLB.510213.9   | mucin-associated surface protein (MASP), putative       | -3,254 | 2,173E-52  |
| TcCLB.511183.230 | trans-sialidase, Group V, putative                      | -3,254 | 9,141E-38  |
| TcCLB.508365.290 | mucin TcMUCII, putative                                 | -3,255 | 4,754E-32  |
| TcCLB.507937.3   | trans-sialidase, putative                               | -3,256 | 6,379E-10  |
| TcCLB.507555.50  | trans-sialidase, Group VIII, putative                   | -3,257 | 3,83E-181  |
| TcCLB.510047.80  | trans-sialidase, Group V, putative                      | -3,257 | 3,306E-63  |
| TcCLB.506623.20  | trans-sialidase (pseudogene), putative                  | -3,26  | 2,562E-49  |
| TcCLB.504801.20  | surface protease GP63, putative                         | -3,26  | 8,386E-33  |
| TcCLB.508165.300 | mucin-associated surface protein (MASP), putative       | -3,261 | 1,151E-94  |
| TcCLB.506057.15  | hypothetical protein                                    | -3,266 | 5,728E-65  |
| TcCLB.511255.630 | mucin-associated surface protein (MASP), putative       | -3,266 | 5,301E-38  |
| TcCLB.508539.160 | mucin-associated surface protein (MASP), putative       | -3,271 | 1,066E-97  |
| TcCLB.506321.20  | mucin-associated surface protein (MASP), putative       | -3,272 | 6,141E-121 |
| TcCLB.510831.10  | mucin-associated surface protein (MASP, pseudogene), pu | -3,272 | 3,371E-24  |
| TcCLB.511599.90  | mucin-associated surface protein (MASP), putative       | -3,273 | 1,003E-60  |
| TcCLB.511553.150 | mucin-associated surface protein (MASP), putative       | -3,274 | 2,718E-72  |
| TcCLB.510847.10  | trans-sialidase, Group VIII, putative                   | -3,276 | 7,925E-302 |
| TcCLB.506799.30  | mucin-like glycoprotein, putative                       | -3,277 | 3,014E-93  |
| TcCLB.505025.10  | mucin-associated surface protein (MASP), putative       | -3,278 | 6,208E-40  |
| TcCLB.506245.200 | mucin-associated surface protein (MASP), putative       | -3,279 | 7,269E-82  |
| TcCLB.505993.30  | trans-sialidase, Group VIII, putative                   | -3,28  | 4,827E-173 |
| TcCLB.510197.160 | mucin-associated surface protein (MASP, pseudogene), pu | -3,281 | 4,325E-133 |
| TcCLB.511595.59  | trans-sialidase, putative (fragment)                    | -3,283 | 4,484E-14  |
| TcCLB.509665.20  | mucin-associated surface protein (MASP), putative       | -3,285 | 3,635E-93  |
| TcCLB.508165.170 | mucin-associated surface protein (MASP), putative       | -3,286 | 2,729E-56  |
| TcCLB.508061.20  | trans-sialidase, Group II, putative                     | -3,287 | 6,677E-131 |
| TcCLB.510013.70  | mucin-associated surface protein (MASP), putative       | -3,287 | 4,122E-28  |
| TcCLB.456627.10  | trans-sialidase (pseudogene), putative                  | -3,29  | 2,392E-08  |
| TcCLB.506279.140 | trans-sialidase, Group V, putative                      | -3,291 | 1,082E-58  |
| TcCLB.503827.60  | mucin-associated surface protein (MASP), putative       | -3,293 | 1,621E-57  |
| TcCLB.510391.20  | mucin-associated surface protein (MASP), putative       | -3,295 | 9,799E-69  |
| TcCLB.511377.30  | mucin-associated surface protein (MASP), putative       | -3,296 | 1,518E-37  |
| TcCLB.506451.20  | trans-sialidase, Group V, putative                      | -3,297 | 9,89E-79   |
| TcCLB.508221.170 | mucin-associated surface protein (MASP), putative       | -3,3   | 2,77E-21   |
| TcCLB.506923.21  | mucin TcMUCII, putative                                 | -3,304 | 1,107E-66  |
| TcCLB.510463.120 | mucin-associated surface protein (MASP), putative       | -3,304 | 1,134E-07  |
| TcCLB.510555.30  | mucin TcMUCII, putative                                 | -3,305 | 1,149E-51  |
| TcCLB.503441.5   | trans-sialidase, putative (fragment)                    | -3,306 | 9,247E-55  |
| TcCLB.506759.160 | mucin TcMUCII, putative                                 | -3,306 | 4,92E-16   |
| TcCLB.510583.130 | mucin-associated surface protein (MASP), putative       | -3,309 | 1,015E-36  |
| TcCLB.507471.10  | surface protease GP63 (pseudogene), putative            | -3,309 | 2,839E-11  |
| TcCLB.507957.90  | mucin TcMUCII, putative                                 | -3,31  | 2,174E-46  |
| TcCLB.510477.100 | mucin-associated surface protein (MASP), putative       | -3,314 | 1,442E-70  |
| TcCLB.509227.10  | mucin TcMUCI, putative                                  | -3,314 | 1,739E-68  |

|                  |                                                          |        |            |
|------------------|----------------------------------------------------------|--------|------------|
| TcCLB.508539.110 | mucin-associated surface protein (MASP), putative        | -3,315 | 3,224E-80  |
| TcCLB.506765.74  | mucin-associated surface protein (MASP), putative        | -3,315 | 1,194E-65  |
| TcCLB.506409.200 | mucin TcMUCII, putative                                  | -3,316 | 1,802E-54  |
| TcCLB.510557.80  | mucin TcMUCII, putative                                  | -3,317 | 3,355E-57  |
| TcCLB.508495.140 | mucin TcMUCII, putative                                  | -3,326 | 2,089E-98  |
| TcCLB.510013.170 | mucin-associated surface protein (MASP), putative        | -3,328 | 1,006E-28  |
| TcCLB.506911.30  | trans-sialidase, Group V, putative                       | -3,329 | 1,853E-91  |
| TcCLB.506307.10  | mucin-associated surface protein (MASP), putative        | -3,33  | 9,936E-48  |
| TcCLB.508365.50  | mucin TcMUCII, putative                                  | -3,332 | 1,894E-17  |
| TcCLB.510459.20  | mucin-associated surface protein (MASP), putative        | -3,335 | 6,88E-62   |
| TcCLB.508243.10  | mucin-associated surface protein (MASP), putative        | -3,337 | 7,139E-93  |
| TcCLB.503827.20  | mucin-associated surface protein (MASP), putative        | -3,34  | 1,064E-51  |
| TcCLB.510625.19  | mucin-associated surface protein (MASP), putative        | -3,342 | 7,977E-29  |
| TcCLB.506499.140 | mucin-associated surface protein (MASP), putative        | -3,343 | 1,331E-94  |
| TcCLB.510025.260 | mucin-associated surface protein (MASP), putative        | -3,35  | 1,137E-101 |
| TcCLB.403869.10  | trans-sialidase, putative (fragment)                     | -3,35  | 1,592E-57  |
| TcCLB.510483.180 | mucin-associated surface protein (MASP), putative        | -3,35  | 8,266E-50  |
| TcCLB.507699.149 | mucin TcMUCII, putative                                  | -3,351 | 3,75E-57   |
| TcCLB.506761.47  | mucin TcMUCII, putative                                  | -3,355 | 1,264E-26  |
| TcCLB.510331.10  | trans-sialidase, Group III, putative                     | -3,356 | 7,963E-158 |
| TcCLB.511551.40  | retrotransposon hot spot protein (RHS, pseudogene), puta | -3,361 | 6,043E-26  |
| TcCLB.506737.128 | mucin TcMUCI, putative                                   | -3,362 | 4,518E-75  |
| TcCLB.506455.30  | trans-sialidase, Group II, putative                      | -3,363 | 5,908E-93  |
| TcCLB.510281.20  | surface protease GP63, putative                          | -3,365 | 1,923E-64  |
| TcCLB.506763.50  | mucin-associated surface protein (MASP), putative        | -3,369 | 4,163E-42  |
| TcCLB.510495.30  | trans-sialidase (pseudogene), putative                   | -3,372 | 1,686E-58  |
| TcCLB.510025.30  | mucin-associated surface protein (MASP, pseudogene), pu  | -3,372 | 2,863E-53  |
| TcCLB.509075.70  | retrotransposon hot spot protein (RHS, pseudogene), puta | -3,372 | 2,522E-11  |
| TcCLB.506289.130 | hypothetical protein                                     | -3,375 | 8,503E-30  |
| TcCLB.511399.24  | trans-sialidase, putative                                | -3,376 | 1,413E-31  |
| TcCLB.511077.100 | mucin TcMUCII, putative                                  | -3,378 | 4,309E-28  |
| TcCLB.509973.70  | mucin-associated surface protein (MASP), putative        | -3,379 | 1,163E-134 |
| TcCLB.506899.40  | mucin TcMUCII, putative                                  | -3,379 | 1,432E-53  |
| TcCLB.511603.90  | trans-sialidase, Group V, putative                       | -3,381 | 2,736E-91  |
| TcCLB.509657.50  | mucin-associated surface protein (MASP), putative        | -3,381 | 2,874E-33  |
| TcCLB.507959.280 | mucin-associated surface protein (MASP), putative        | -3,389 | 1,353E-85  |
| TcCLB.510377.100 | mucin-associated surface protein (MASP), putative        | -3,39  | 7,122E-25  |
| TcCLB.506501.220 | mucin-associated surface protein (MASP), putative        | -3,393 | 1,517E-40  |
| TcCLB.506067.290 | mucin-associated surface protein (MASP), putative        | -3,395 | 4,698E-131 |
| TcCLB.506767.324 | mucin TcMUCII, putative                                  | -3,396 | 1,963E-31  |
| TcCLB.503587.10  | mucin-associated surface protein (MASP), putative        | -3,396 | 3,318E-25  |
| TcCLB.510377.330 | trans-sialidase, Group V, putative                       | -3,4   | 6,196E-133 |
| TcCLB.506801.20  | mucin-like glycoprotein, putative                        | -3,401 | 6,554E-93  |
| TcCLB.507953.40  | mucin-associated surface protein (MASP), putative        | -3,403 | 4,494E-51  |
| TcCLB.509419.40  | trans-sialidase, Group V, putative                       | -3,406 | 2,277E-07  |

|                  |                                                         |        |            |
|------------------|---------------------------------------------------------|--------|------------|
| TcCLB.507699.200 | mucin TcMUCII, putative                                 | -3,407 | 2,469E-59  |
| TcCLB.412393.10  | trans-sialidase, putative (pseudogene)                  | -3,407 | 2,035E-18  |
| TcCLB.511089.130 | mucin-associated surface protein (MASP), putative       | -3,412 | 7,054E-41  |
| TcCLB.511221.60  | trans-sialidase, Group V, putative                      | -3,415 | 8,399E-113 |
| TcCLB.507237.100 | mucin-associated surface protein (MASP), putative       | -3,417 | 1,326E-24  |
| TcCLB.506021.20  | trans-sialidase, Group II, putative                     | -3,422 | 1,983E-82  |
| TcCLB.508149.70  | mucin TcMUCII, putative                                 | -3,422 | 6,285E-38  |
| TcCLB.421173.14  | trans-sialidase, putative                               | -3,422 | 7,687E-30  |
| TcCLB.506909.60  | mucin TcMUCI, putative                                  | -3,423 | 3,111E-25  |
| TcCLB.503977.30  | mucin-associated surface protein (MASP), putative       | -3,425 | 3,339E-75  |
| TcCLB.508789.160 | mucin TcMUCII, putative                                 | -3,425 | 1,056E-27  |
| TcCLB.448661.20  | mucin TcMUCII, putative                                 | -3,427 | 2,226E-46  |
| TcCLB.506767.50  | mucin TcMUCII, putative                                 | -3,431 | 4,689E-48  |
| TcCLB.423707.10  | trans-sialidase, putative (fragment)                    | -3,434 | 2,465E-47  |
| TcCLB.508247.50  | mucin-associated surface protein (MASP, pseudogene), pu | -3,435 | 1,261E-49  |
| TcCLB.503717.10  | trans-sialidase, Group V, putative                      | -3,437 | 5,286E-62  |
| TcCLB.507237.170 | mucin-associated surface protein (MASP), putative       | -3,437 | 5,477E-09  |
| TcCLB.511197.60  | mucin-associated surface protein (MASP), putative       | -3,439 | 5,942E-93  |
| TcCLB.509077.20  | trans-sialidase (pseudogene), putative                  | -3,441 | 3,952E-44  |
| TcCLB.506755.50  | hypothetical protein, conserved                         | -3,443 | 1,815E-228 |
| TcCLB.507995.20  | trans-sialidase, putative                               | -3,443 | 2,048E-51  |
| TcCLB.511233.140 | trans-sialidase, Group V, putative                      | -3,443 | 1,417E-20  |
| TcCLB.510373.119 | mucin-associated surface protein (MASP), putative       | -3,445 | 3,555E-56  |
| TcCLB.504155.10  | mucin-associated surface protein (MASP), putative       | -3,452 | 1,169E-28  |
| TcCLB.505297.60  | mucin-associated surface protein (MASP), putative       | -3,454 | 3,142E-78  |
| TcCLB.511077.60  | mucin-associated surface protein (MASP), putative       | -3,454 | 7,763E-37  |
| TcCLB.508999.60  | mucin TcMUCII, putative                                 | -3,457 | 1,36E-69   |
| TcCLB.504081.530 | mucin-associated surface protein (MASP), putative       | -3,457 | 7,57E-33   |
| TcCLB.511603.260 | mucin TcMUCII, putative                                 | -3,461 | 1,809E-29  |
| TcCLB.509763.10  | trans-sialidase, putative                               | -3,465 | 1,082E-56  |
| TcCLB.508165.200 | trans-sialidase (pseudogene), putative                  | -3,465 | 2,333E-41  |
| TcCLB.511089.90  | mucin-associated surface protein (MASP), putative       | -3,466 | 4,774E-24  |
| TcCLB.504127.30  | trans-sialidase (pseudogene), putative                  | -3,467 | 1,172E-234 |
| TcCLB.508493.40  | mucin TcMUCII, putative                                 | -3,469 | 1,711E-146 |
| TcCLB.503447.20  | trans-sialidase, Group II, putative                     | -3,469 | 5,529E-115 |
| TcCLB.510279.230 | trans-sialidase, Group VI, putative                     | -3,469 | 6,293E-41  |
| TcCLB.507639.10  | poly-zinc finger protein 2, putative                    | -3,471 | 5,024E-86  |
| TcCLB.503417.50  | hypothetical protein                                    | -3,473 | 2,988E-98  |
| TcCLB.508071.20  | trans-sialidase (pseudogene), putative                  | -3,473 | 2,069E-44  |
| TcCLB.508165.110 | mucin-associated surface protein (MASP), putative       | -3,473 | 4,496E-35  |
| TcCLB.511173.80  | trans-sialidase, Group V, putative                      | -3,474 | 6,518E-56  |
| TcCLB.505949.160 | mucin TcMUCII, putative                                 | -3,475 | 6,372E-43  |
| TcCLB.509979.350 | mucin-associated surface protein (MASP), putative       | -3,479 | 1,907E-171 |
| TcCLB.510093.20  | trans-sialidase, Group VIII, putative                   | -3,484 | 5,948E-78  |
| TcCLB.511061.51  | mucin-associated surface protein (MASP), putative       | -3,485 | 1,493E-90  |

|                  |                                                                 |        |            |
|------------------|-----------------------------------------------------------------|--------|------------|
| TcCLB.507953.200 | 90 kDa surface protein, putative                                | -3,49  | 1,964E-74  |
| TcCLB.504733.10  | beta galactofuranosyl glycosyltransferase (pseudogene), $\beta$ | -3,49  | 1,987E-29  |
| TcCLB.508005.10  | hypothetical protein                                            | -3,491 | 1,414E-37  |
| TcCLB.509527.50  | mucin TcMUCII (pseudogene), putative                            | -3,494 | 5,946E-34  |
| TcCLB.506067.169 | mucin-associated surface protein (MASP), putative               | -3,497 | 3,321E-73  |
| TcCLB.510015.30  | mucin-associated surface protein (MASP), putative               | -3,501 | 7,041E-183 |
| TcCLB.508541.90  | mucin-associated surface protein (MASP), putative               | -3,502 | 2,343E-89  |
| TcCLB.424889.10  | UDP-Gal or UDP-GlcNAc-dependent glycosyltransferase, $\beta$    | -3,503 | 8,008E-31  |
| TcCLB.510889.280 | metacyclin II, putative                                         | -3,503 | 1,232E-29  |
| TcCLB.508853.20  | trans-sialidase, Group V, putative                              | -3,507 | 3,042E-109 |
| TcCLB.507699.230 | trans-sialidase, putative                                       | -3,507 | 2,582E-88  |
| TcCLB.506309.30  | mucin-associated surface protein (MASP), putative               | -3,51  | 2,852E-37  |
| TcCLB.510375.10  | mucin-associated surface protein (MASP), putative               | -3,515 | 3,255E-57  |
| TcCLB.508375.20  | trans-sialidase, Group V, putative                              | -3,516 | 2,858E-128 |
| TcCLB.510807.10  | mucin TcMUCII, putative                                         | -3,517 | 2,361E-40  |
| TcCLB.506173.310 | mucin TcMUCII, putative                                         | -3,519 | 1,231E-101 |
| TcCLB.506321.210 | mucin TcMUCII, putative                                         | -3,519 | 6,054E-43  |
| TcCLB.506289.210 | surface protease GP63, putative                                 | -3,521 | 4,321E-94  |
| TcCLB.508761.80  | mucin TcMUCII, putative                                         | -3,521 | 4,582E-63  |
| TcCLB.506613.24  | mucin TcMUCII, putative                                         | -3,521 | 1,559E-48  |
| TcCLB.402255.10  | retrotransposon hot spot protein (RHS, pseudogene), puta        | -3,527 | 7,652E-56  |
| TcCLB.510477.30  | mucin TcMUCI, putative                                          | -3,528 | 6,144E-46  |
| TcCLB.509081.20  | mucin-associated surface protein (MASP), putative               | -3,529 | 5,046E-136 |
| TcCLB.507069.50  | mucin-associated surface protein (MASP, pseudogene), $\mu$      | -3,532 | 4,747E-63  |
| TcCLB.510019.30  | mucin-associated surface protein (MASP), putative               | -3,533 | 8,61E-60   |
| TcCLB.507305.40  | zinc finger CCCH domain containing protein 11 (ZC3H11)          | -3,534 | 6,436E-10  |
| TcCLB.510921.30  | mucin-associated surface protein (MASP), putative               | -3,535 | 9,125E-91  |
| TcCLB.506321.120 | mucin-associated surface protein (MASP), putative               | -3,537 | 1,385E-208 |
| TcCLB.508273.120 | mucin TcMUCI, putative                                          | -3,537 | 2,143E-36  |
| TcCLB.510475.70  | mucin TcMUCII, putative                                         | -3,541 | 3,143E-45  |
| TcCLB.508427.20  | mucin-associated surface protein (MASP), putative               | -3,545 | 1,002E-93  |
| TcCLB.408445.10  | trans-sialidase, putative (fragment)                            | -3,546 | 2,821E-61  |
| TcCLB.443899.10  | trans-sialidase, putative (fragment)                            | -3,546 | 1,477E-12  |
| TcCLB.511553.30  | mucin-associated surface protein (MASP), putative               | -3,548 | 5,802E-151 |
| TcCLB.508977.10  | trans-sialidase, Group V, putative                              | -3,549 | 1,22E-102  |
| TcCLB.508219.10  | mucin-associated surface protein (MASP, pseudogene), $\mu$      | -3,549 | 8,972E-48  |
| TcCLB.504031.11  | hypothetical protein                                            | -3,552 | 1,952E-80  |
| TcCLB.508273.100 | mucin TcMUCI, putative                                          | -3,553 | 1,76E-62   |
| TcCLB.506799.110 | hypothetical protein                                            | -3,554 | 1,233E-47  |
| TcCLB.511785.10  | mucin-associated surface protein (MASP), putative               | -3,557 | 1,647E-37  |
| TcCLB.508247.40  | mucin TcMUCII, putative                                         | -3,559 | 6,521E-36  |
| TcCLB.507071.349 | mucin-associated surface protein (MASP), putative               | -3,559 | 4,982E-22  |
| TcCLB.508613.74  | mucin-associated surface protein (MASP), putative               | -3,562 | 1,872E-102 |
| TcCLB.508979.50  | trans-sialidase, Group VI, putative                             | -3,562 | 2,406E-63  |
| TcCLB.506759.80  | mucin-associated surface protein (MASP), putative               | -3,562 | 1,324E-55  |

|                  |                                                          |        |            |
|------------------|----------------------------------------------------------|--------|------------|
| TcCLB.506501.350 | mucin-associated surface protein (MASP), putative        | -3,575 | 1,569E-37  |
| TcCLB.507953.10  | trans-sialidase, Group V, putative                       | -3,575 | 3,277E-29  |
| TcCLB.508541.110 | mucin-associated surface protein (MASP), putative        | -3,576 | 1,228E-77  |
| TcCLB.508627.40  | trans-sialidase, Group VIII, putative                    | -3,578 | 3,518E-175 |
| TcCLB.511255.30  | mucin-associated surface protein (MASP), putative        | -3,578 | 4,724E-60  |
| TcCLB.511605.30  | mucin TcMUCII, putative                                  | -3,581 | 1,591E-21  |
| TcCLB.506289.120 | mucin-associated surface protein (MASP), putative        | -3,582 | 3,052E-122 |
| TcCLB.508777.210 | hypothetical protein                                     | -3,585 | 1,374E-33  |
| TcCLB.510699.40  | mucin TcMUCII, putative                                  | -3,59  | 2,562E-46  |
| TcCLB.421173.4   | trans-sialidase, putative (fragment)                     | -3,592 | 2,643E-117 |
| TcCLB.510713.170 | mucin-associated surface protein (MASP), putative        | -3,592 | 8,227E-49  |
| TcCLB.508165.410 | mucin-associated surface protein (MASP), putative        | -3,595 | 4,32E-76   |
| TcCLB.511791.10  | mucin-associated surface protein (MASP), putative        | -3,596 | 1,016E-21  |
| TcCLB.510465.100 | trans-sialidase, Group V, putative                       | -3,605 | 5,011E-48  |
| TcCLB.457977.10  | trans-sialidase, putative (fragment)                     | -3,611 | 4,049E-46  |
| TcCLB.508977.40  | trans-sialidase, Group V, putative                       | -3,613 | 7,014E-140 |
| TcCLB.506345.90  | trans-sialidase, Group II, putative                      | -3,614 | 3,726E-105 |
| TcCLB.508485.30  | retrotransposon hot spot protein (RHS, pseudogene), puta | -3,614 | 5,269E-39  |
| TcCLB.509081.140 | mucin TcMUCII, putative                                  | -3,617 | 4,792E-74  |
| TcCLB.506159.5   | trans-sialidase, putative (fragment)                     | -3,62  | 1,015E-33  |
| TcCLB.506737.161 | mucin TcMUCI, putative                                   | -3,621 | 3,101E-87  |
| TcCLB.506763.150 | mucin-associated surface protein (MASP), putative        | -3,621 | 2,442E-30  |
| TcCLB.511875.80  | mucin-associated surface protein (MASP), putative        | -3,622 | 1,048E-144 |
| TcCLB.506767.340 | mucin-associated surface protein (MASP), putative        | -3,627 | 1,936E-147 |
| TcCLB.508977.120 | trans-sialidase, Group V, putative                       | -3,628 | 5,528E-158 |
| TcCLB.510363.270 | mucin TcMUCII, putative                                  | -3,629 | 4,689E-09  |
| TcCLB.506759.90  | trans-sialidase (pseudogene), putative                   | -3,63  | 3,207E-70  |
| TcCLB.506917.60  | mucin TcMUCII, putative                                  | -3,63  | 6,23E-28   |
| TcCLB.506057.101 | surface protease GP63, putative (fragment)               | -3,631 | 5,401E-12  |
| TcCLB.508761.30  | mucin-associated surface protein (MASP), putative        | -3,639 | 5,615E-164 |
| TcCLB.511861.50  | trans-sialidase, Group VIII, putative                    | -3,639 | 1,237E-70  |
| TcCLB.508305.50  | mucin-associated surface protein (MASP), putative        | -3,64  | 2,023E-86  |
| TcCLB.510477.70  | mucin TcMUCII, putative                                  | -3,644 | 6,068E-47  |
| TcCLB.508359.80  | mucin-associated surface protein (MASP), putative        | -3,645 | 9,067E-35  |
| TcCLB.510567.10  | trans-sialidase, putative (fragment)                     | -3,645 | 1,909E-22  |
| TcCLB.506267.70  | mucin-associated surface protein (MASP), putative        | -3,648 | 1,095E-59  |
| TcCLB.507275.61  | surface antigen TASV-A1 (TASV-A1)                        | -3,658 | 6,472E-131 |
| TcCLB.432997.10  | trans-sialidase, putative                                | -3,658 | 3,056E-58  |
| TcCLB.507949.210 | trans-sialidase, Group II, putative                      | -3,659 | 3,759E-178 |
| TcCLB.509527.70  | mucin TcMUCII, putative                                  | -3,66  | 2,447E-52  |
| TcCLB.511605.80  | mucin-associated surface protein (MASP), putative        | -3,662 | 1,865E-46  |
| TcCLB.509525.120 | mucin TcMUCII, putative                                  | -3,663 | 5,915E-41  |
| TcCLB.510013.230 | mucin-associated surface protein (MASP), putative        | -3,665 | 4,396E-67  |
| TcCLB.509527.130 | hypothetical protein                                     | -3,666 | 2,628E-72  |
| TcCLB.511091.9   | mucin-associated surface protein (MASP), putative        | -3,666 | 1,458E-28  |

|                  |                                                          |        |            |
|------------------|----------------------------------------------------------|--------|------------|
| TcCLB.507997.30  | trans-sialidase, Group V, putative                       | -3,668 | 4,828E-133 |
| TcCLB.507065.29  | mucin-associated surface protein (MASP), pseudogene), pi | -3,677 | 2,368E-74  |
| TcCLB.507041.71  | mucin TcMUCI, putative                                   | -3,68  | 4,25E-62   |
| TcCLB.506285.50  | mucin TcMUCII, putative                                  | -3,683 | 5,505E-116 |
| TcCLB.510275.260 | trans-sialidase (pseudogene), putative                   | -3,686 | 8E-71      |
| TcCLB.507071.310 | mucin-associated surface protein (MASP), putative        | -3,69  | 1,314E-52  |
| TcCLB.511757.70  | trans-sialidase, Group II, putative                      | -3,691 | 1,911E-142 |
| TcCLB.504081.170 | mucin-associated surface protein (MASP), putative        | -3,693 | 1,072E-69  |
| TcCLB.510279.110 | trans-sialidase, Group VI, putative                      | -3,693 | 1,54E-52   |
| TcCLB.413489.10  | retrotransposon hot spot protein (RHS, pseudogene), puta | -3,695 | 1,017E-23  |
| TcCLB.510081.40  | trans-sialidase (pseudogene), putative                   | -3,702 | 4,622E-11  |
| TcCLB.509699.40  | trans-sialidase, Group V, putative                       | -3,707 | 2,757E-111 |
| TcCLB.506767.130 | mucin TcMUCII, putative                                  | -3,707 | 7,121E-24  |
| TcCLB.508295.80  | mucin TcMUCII, putative                                  | -3,71  | 2,402E-55  |
| TcCLB.511603.170 | mucin TcMUCII, putative                                  | -3,713 | 5,478E-38  |
| TcCLB.510583.100 | mucin TcMUCII, putative                                  | -3,713 | 2,211E-31  |
| TcCLB.510371.90  | trans-sialidase, Group V, putative                       | -3,714 | 1,516E-232 |
| TcCLB.510927.20  | trans-sialidase (pseudogene), putative                   | -3,714 | 1,342E-222 |
| TcCLB.506321.50  | mucin-associated surface protein (MASP), putative        | -3,716 | 0          |
| TcCLB.510377.200 | mucin-associated surface protein (MASP), putative        | -3,718 | 1,361E-98  |
| TcCLB.508871.40  | mucin-associated surface protein (MASP), putative        | -3,718 | 4,931E-64  |
| TcCLB.511785.5   | hypothetical protein                                     | -3,72  | 3,369E-19  |
| TcCLB.511127.10  | RNA-binding protein 5, putative                          | -3,721 | 6,917E-16  |
| TcCLB.510881.9   | trans-sialidase, putative                                | -3,723 | 5,333E-53  |
| TcCLB.506331.90  | trans-sialidase, Group II, putative                      | -3,729 | 5,506E-95  |
| TcCLB.511551.10  | trans-sialidase, Group II, putative                      | -3,729 | 1,699E-43  |
| TcCLB.511173.470 | trans-sialidase, Group V, putative                       | -3,73  | 2,086E-114 |
| TcCLB.511401.30  | trans-sialidase, Group V, putative                       | -3,736 | 1,791E-118 |
| TcCLB.507085.170 | mucin TcMUCII, putative                                  | -3,738 | 2,198E-109 |
| TcCLB.510233.39  | trans-sialidase, putative (fragment)                     | -3,738 | 1,567E-35  |
| TcCLB.509259.40  | surface protease GP63, putative                          | -3,74  | 2,256E-49  |
| TcCLB.504239.100 | mucin TcMUCII, putative                                  | -3,741 | 4,694E-65  |
| TcCLB.511549.10  | retrotransposon hot spot protein (RHS, pseudogene), puta | -3,745 | 1,14E-34   |
| TcCLB.510013.260 | mucin-associated surface protein (MASP), putative        | -3,748 | 1,644E-78  |
| TcCLB.507957.280 | mucin-associated surface protein (MASP), putative        | -3,752 | 6,938E-119 |
| TcCLB.508099.50  | trans-sialidase, putative                                | -3,752 | 1,656E-14  |
| TcCLB.510715.30  | mucin-associated surface protein (MASP), putative        | -3,759 | 7,223E-117 |
| TcCLB.510281.10  | hypothetical protein                                     | -3,76  | 3,534E-40  |
| TcCLB.506615.50  | mucin TcMUCII, putative                                  | -3,762 | 2,796E-295 |
| TcCLB.508615.10  | mucin-associated surface protein (MASP), putative        | -3,762 | 1,998E-55  |
| TcCLB.510495.20  | mucin-associated surface protein (MASP), putative        | -3,762 | 5,26E-28   |
| TcCLB.509011.80  | surface protease GP63, putative                          | -3,764 | 2,977E-173 |
| TcCLB.433559.10  | trans-sialidase, putative (fragment)                     | -3,766 | 3,376E-38  |
| TcCLB.508493.10  | mucin TcMUCII, putative                                  | -3,769 | 3,347E-168 |
| TcCLB.506767.140 | mucin-associated surface protein (MASP), putative        | -3,769 | 3,535E-65  |



|                  |                                                          |        |            |
|------------------|----------------------------------------------------------|--------|------------|
| TcCLB.510463.90  | mucin-associated surface protein (MASP), putative        | -3,772 | 6,042E-09  |
| TcCLB.507959.110 | mucin-associated surface protein (MASP), putative        | -3,774 | 4,885E-57  |
| TcCLB.511173.280 | trans-sialidase, Group V, putative                       | -3,777 | 5,356E-95  |
| TcCLB.504239.30  | mucin-associated surface protein (MASP), putative        | -3,779 | 2,097E-69  |
| TcCLB.509419.70  | trans-sialidase, Group V, putative                       | -3,782 | 2,09E-80   |
| TcCLB.511083.30  | mucin-associated surface protein (MASP), putative        | -3,782 | 3,621E-35  |
| TcCLB.504239.260 | trans-sialidase, Group V, putative                       | -3,788 | 2,378E-66  |
| TcCLB.510465.74  | mucin-associated surface protein (MASP), putative        | -3,791 | 3,932E-39  |
| TcCLB.508007.10  | trans-sialidase, putative                                | -3,797 | 3,139E-10  |
| TcCLB.509771.10  | trans-sialidase, Group II, putative                      | -3,803 | 1,483E-45  |
| TcCLB.508903.100 | ATPase, putative                                         | -3,804 | 1,656E-53  |
| TcCLB.510539.10  | mucin-associated surface protein (MASP), putative        | -3,805 | 2,881E-18  |
| TcCLB.507687.10  | trans-sialidase, putative                                | -3,806 | 7,781E-153 |
| TcCLB.511129.40  | trans-sialidase, Group III, putative                     | -3,81  | 1,995E-12  |
| TcCLB.508305.20  | mucin-associated surface protein (MASP), putative        | -3,812 | 1,08E-75   |
| TcCLB.506133.54  | mucin-associated surface protein (MASP), putative        | -3,813 | 1,131E-87  |
| TcCLB.510279.250 | mucin-associated surface protein (MASP), putative        | -3,814 | 2,341E-35  |
| TcCLB.510373.10  | mucin-associated surface protein (MASP), putative        | -3,821 | 1,683E-127 |
| TcCLB.510483.70  | mucin-associated surface protein (MASP), putative        | -3,822 | 4,328E-100 |
| TcCLB.510625.54  | mucin-associated surface protein (MASP), putative        | -3,823 | 1,123E-62  |
| TcCLB.509525.90  | mucin TcMUCII, putative                                  | -3,823 | 1,118E-44  |
| TcCLB.507957.179 | mucin-associated surface protein (MASP), putative        | -3,829 | 9,111E-65  |
| TcCLB.510475.90  | mucin TcMUCII, putative                                  | -3,835 | 2,841E-63  |
| TcCLB.505997.70  | ATPase, putative                                         | -3,837 | 4,76E-39   |
| TcCLB.463955.20  | mucin-associated surface protein (MASP), putative (fragn | -3,837 | 1,284E-25  |
| TcCLB.511183.210 | mucin TcMUCII, putative                                  | -3,839 | 4,677E-99  |
| TcCLB.511057.30  | mucin-associated surface protein (MASP), putative        | -3,844 | 8,427E-59  |
| TcCLB.510361.130 | serine-alanine-and proline-rich protein, putative        | -3,845 | 4,794E-27  |
| TcCLB.509699.140 | mucin-associated surface protein (MASP, pseudogene), pi  | -3,846 | 4,227E-88  |
| TcCLB.506765.50  | mucin-associated surface protein (MASP), putative        | -3,856 | 2,137E-70  |
| TcCLB.510013.40  | mucin-associated surface protein (MASP), putative        | -3,858 | 1,769E-70  |
| TcCLB.508103.30  | trans-sialidase, Group V, putative                       | -3,858 | 3,794E-36  |
| TcCLB.506131.110 | mucin-associated surface protein (MASP), putative        | -3,864 | 1,18E-54   |
| TcCLB.510021.160 | 90 kDa surface protein, putative                         | -3,87  | 6,447E-81  |
| TcCLB.508161.20  | trans-sialidase, Group V, putative                       | -3,87  | 1,69E-76   |
| TcCLB.510371.70  | mucin-associated surface protein (MASP), putative        | -3,871 | 1,666E-73  |
| TcCLB.510157.10  | mucin-associated surface protein (MASP), putative        | -3,875 | 6,36E-125  |
| TcCLB.508165.130 | surface protease GP63, putative                          | -3,875 | 1,073E-86  |
| TcCLB.503907.10  | trans-sialidase, Group VIII, putative                    | -3,88  | 5,095E-36  |
| TcCLB.508289.9   | mucin-associated surface protein (MASP), putative        | -3,882 | 2,056E-31  |
| TcCLB.507043.10  | mucin TcMUCI, putative                                   | -3,883 | 3,904E-73  |
| TcCLB.504039.230 | mucin-associated surface protein (MASP), putative        | -3,884 | 1,451E-78  |
| TcCLB.511449.10  | mucin-associated surface protein (MASP), putative        | -3,886 | 2,687E-57  |
| TcCLB.503859.40  | mucin-associated surface protein (MASP), putative        | -3,888 | 3,055E-115 |
| TcCLB.506763.130 | mucin-associated surface protein (MASP), putative        | -3,891 | 2,159E-97  |

|                  |                                                          |        |            |
|------------------|----------------------------------------------------------|--------|------------|
| TcCLB.506599.100 | mucin-associated surface protein (MASP), putative        | -3,893 | 1,442E-63  |
| TcCLB.508165.270 | mucin TcMUCII, putative                                  | -3,893 | 2,188E-32  |
| TcCLB.510047.60  | mucin-associated surface protein (MASP, pseudogene), pu  | -3,9   | 2,56E-134  |
| TcCLB.503501.50  | trans-sialidase (pseudogene), putative                   | -3,903 | 1,949E-95  |
| TcCLB.503957.10  | trans-sialidase, putative                                | -3,907 | 3,383E-188 |
| TcCLB.506767.240 | mucin-associated surface protein (MASP), putative        | -3,91  | 1,582E-89  |
| TcCLB.506471.30  | trans-sialidase, Group II, putative                      | -3,916 | 3,826E-163 |
| TcCLB.507953.180 | mucin TcMUCII, putative                                  | -3,921 | 6,261E-101 |
| TcCLB.504081.330 | mucin TcMUCII, putative                                  | -3,922 | 7,634E-45  |
| TcCLB.506967.10  | trans-sialidase, Group V, putative                       | -3,925 | 4,111E-102 |
| TcCLB.507523.60  | mucin-associated surface protein (MASP), putative        | -3,936 | 7,097E-61  |
| TcCLB.508163.20  | mucin TcMUCII, putative                                  | -3,936 | 4,374E-49  |
| TcCLB.510275.60  | mucin-associated surface protein (MASP), putative        | -3,944 | 3,194E-70  |
| TcCLB.509525.220 | mucin TcMUCII, putative                                  | -3,947 | 7,792E-33  |
| TcCLB.509525.350 | mucin TcMUCII, putative                                  | -3,951 | 1,67E-46   |
| TcCLB.506087.10  | retrotransposon hot spot protein (RHS, pseudogene), puta | -3,951 | 1,065E-22  |
| TcCLB.508595.20  | UDP-Gal or UDP-GlcNAc-dependent glycosyltransferase, Ꞥ   | -3,953 | 1,754E-130 |
| TcCLB.511089.30  | mucin-associated surface protein (MASP), putative        | -3,953 | 8,939E-65  |
| TcCLB.510489.20  | mucin-associated surface protein (MASP), putative        | -3,955 | 8,979E-104 |
| TcCLB.506955.99  | mucin-associated surface protein (MASP), putative        | -3,956 | 4,485E-105 |
| TcCLB.508985.21  | mucin TcMUCII, putative (fragment)                       | -3,957 | 1,493E-12  |
| TcCLB.510487.50  | mucin-associated surface protein (MASP), putative        | -3,961 | 1,663E-100 |
| TcCLB.507953.70  | 90 kDa surface protein, putative                         | -3,963 | 2,732E-68  |
| TcCLB.504239.220 | mucin-associated surface protein (MASP52)                | -3,963 | 6,491E-64  |
| TcCLB.510769.170 | trans-sialidase (pseudogene), putative                   | -3,966 | 1,762E-290 |
| TcCLB.510583.40  | mucin TcMUCII, putative                                  | -3,979 | 1,489E-53  |
| TcCLB.506671.90  | mucin-associated surface protein (MASP), putative        | -3,98  | 9,623E-46  |
| TcCLB.507957.300 | mucin-associated surface protein (MASP), putative        | -3,98  | 3,777E-35  |
| TcCLB.508637.10  | trans-sialidase, Group III, putative                     | -3,985 | 2,242E-65  |
| TcCLB.509185.30  | trans-sialidase, Group II, putative                      | -3,987 | 2,04E-12   |
| TcCLB.508165.40  | trans-sialidase (pseudogene), putative                   | -3,989 | 3,743E-114 |
| TcCLB.506067.140 | mucin-associated surface protein (MASP), putative        | -3,99  | 1,135E-69  |
| TcCLB.505363.19  | trans-sialidase, putative                                | -3,991 | 9,916E-219 |
| TcCLB.506133.61  | mucin-associated surface protein (MASP), putative        | -3,996 | 8,553E-42  |
| TcCLB.508365.10  | mucin TcMUCII, putative                                  | -4,001 | 4,261E-55  |
| TcCLB.511173.496 | mucin-associated surface protein (MASP), putative (fragn | -4,001 | 6,824E-16  |
| TcCLB.506501.80  | mucin-associated surface protein (MASP, pseudogene), pu  | -4,003 | 3,439E-189 |
| TcCLB.506187.50  | mucin-associated surface protein (MASP), putative        | -4,007 | 5,457E-84  |
| TcCLB.505025.40  | mucin-associated surface protein (MASP), putative        | -4,008 | 5,898E-84  |
| TcCLB.503771.90  | mucin-associated surface protein (MASP), putative        | -4,01  | 1,166E-54  |
| TcCLB.508071.50  | surface protease GP63, putative                          | -4,012 | 1,117E-44  |
| TcCLB.507357.90  | mucin-associated surface protein (MASP), putative        | -4,013 | 5,574E-20  |
| TcCLB.506761.19  | mucin TcMUCII, putative                                  | -4,016 | 6,011E-64  |
| TcCLB.503705.11  | UDP-Gal or UDP-GlcNAc-dependent glycosyltransferase (Ꞥ   | -4,016 | 6,374E-24  |
| TcCLB.510275.350 | trans-sialidase, Group V, putative                       | -4,018 | 2,453E-83  |

|                  |                                                   |        |            |
|------------------|---------------------------------------------------|--------|------------|
| TcCLB.508433.10  | mucin-associated surface protein (MASP), putative | -4,024 | 1,563E-15  |
| TcCLB.510583.70  | mucin TcMUCII, putative                           | -4,027 | 9,866E-82  |
| TcCLB.506975.90  | trans-sialidase, Group VIII, putative             | -4,029 | 1,381E-99  |
| TcCLB.506139.40  | mucin-associated surface protein (MASP), putative | -4,029 | 7,159E-98  |
| TcCLB.507145.79  | mucin TcMUCII, putative                           | -4,031 | 1,078E-06  |
| TcCLB.508977.80  | trans-sialidase, Group V, putative                | -4,032 | 7,715E-116 |
| TcCLB.506131.190 | mucin-associated surface protein (MASP), putative | -4,046 | 1,126E-80  |
| TcCLB.510693.163 | mucin-associated surface protein (MASP), putative | -4,048 | 8,206E-300 |
| TcCLB.508435.70  | mucin-associated surface protein (MASP), putative | -4,055 | 1,425E-87  |
| TcCLB.510377.350 | mucin-associated surface protein (MASP), putative | -4,059 | 1,334E-112 |
| TcCLB.507163.70  | trans-sialidase, Group V, putative                | -4,063 | 5,661E-229 |
| TcCLB.398477.10  | trans-sialidase, Group II, putative               | -4,067 | 8,06E-146  |
| TcCLB.507059.10  | mucin-like glycoprotein, putative                 | -4,068 | 1,058E-88  |
| TcCLB.507957.220 | mucin-associated surface protein (MASP), putative | -4,074 | 7,441E-128 |
| TcCLB.506137.40  | mucin TcMUCII, putative                           | -4,074 | 3,166E-24  |
| TcCLB.507233.10  | trans-sialidase, Group III, putative              | -4,08  | 1,588E-67  |
| TcCLB.506759.40  | mucin-associated surface protein (MASP), putative | -4,081 | 1,066E-176 |
| TcCLB.463955.10  | mucin TcMUCII, putative                           | -4,082 | 3,714E-69  |
| TcCLB.508853.10  | mucin-associated surface protein (MASP), putative | -4,086 | 1,151E-106 |
| TcCLB.509525.250 | mucin TcMUCII, putative                           | -4,086 | 6,344E-46  |
| TcCLB.506597.30  | mucin TcMUCII, putative                           | -4,091 | 2,838E-63  |
| TcCLB.506993.160 | trans-sialidase (pseudogene), putative            | -4,093 | 7,083E-120 |
| TcCLB.511401.90  | trans-sialidase, Group V, putative                | -4,095 | 4,619E-140 |
| TcCLB.454787.10  | mucin TcMUC, putative                             | -4,108 | 1,578E-08  |
| TcCLB.511173.130 | trans-sialidase, Group V, putative                | -4,109 | 8,411E-178 |
| TcCLB.506843.5   | trans-sialidase, putative (fragment)              | -4,124 | 1,841E-28  |
| TcCLB.506245.140 | trans-sialidase (pseudogene), putative            | -4,126 | 1,379E-30  |
| TcCLB.506599.350 | mucin TcMUCII, putative                           | -4,137 | 2,658E-21  |
| TcCLB.504239.410 | mucin TcMUCII, putative                           | -4,138 | 5,71E-72   |
| TcCLB.506799.100 | mucin-like glycoprotein, putative                 | -4,147 | 2,464E-131 |
| TcCLB.506501.280 | mucin TcMUCII, putative                           | -4,151 | 3,737E-36  |
| TcCLB.509973.10  | mucin-associated surface protein (MASP), putative | -4,155 | 1,183E-263 |
| TcCLB.506955.212 | mucin-associated surface protein (MASP), putative | -4,161 | 1,224E-121 |
| TcCLB.507849.10  | trans-sialidase (pseudogene), putative            | -4,161 | 3,268E-44  |
| TcCLB.510021.200 | mucin TcMUCII, putative                           | -4,162 | 5,806E-55  |
| TcCLB.403031.10  | trans-sialidase, putative (fragment)              | -4,165 | 2,137E-14  |
| TcCLB.509529.40  | trans-sialidase, Group VII, putative              | -4,174 | 4,466E-218 |
| TcCLB.510037.10  | mucin-associated surface protein (MASP), putative | -4,175 | 6,759E-168 |
| TcCLB.506887.10  | trans-sialidase, putative                         | -4,182 | 5,416E-61  |
| TcCLB.510025.210 | mucin TcMUCII, putative                           | -4,183 | 3,236E-56  |
| TcCLB.510693.320 | mucin-associated surface protein (MASP), putative | -4,197 | 7,5E-143   |
| TcCLB.477471.10  | trans-sialidase (pseudogene), putative            | -4,198 | 1,648E-178 |
| TcCLB.510713.130 | mucin-associated surface protein (MASP), putative | -4,2   | 3,141E-84  |
| TcCLB.510275.355 | hypothetical protein                              | -4,2   | 1,127E-56  |
| TcCLB.510049.10  | trans-sialidase, putative                         | -4,201 | 7,756E-163 |

|                  |                                                           |        |            |
|------------------|-----------------------------------------------------------|--------|------------|
| TcCLB.504081.420 | mucin-associated surface protein (MASP), putative         | -4,202 | 9,257E-42  |
| TcCLB.504929.5   | zinc finger CCCH domain containing protein 11 (ZC3H11)    | -4,206 | 5,642E-16  |
| TcCLB.508493.100 | mucin TcMUCII, putative                                   | -4,209 | 4,014E-247 |
| TcCLB.506769.50  | mucin TcMUCII, putative                                   | -4,21  | 9,374E-57  |
| TcCLB.510025.70  | 90 kDa surface protein, putative                          | -4,217 | 1,433E-98  |
| TcCLB.510359.520 | mucin-associated surface protein (MASP), putative         | -4,217 | 1,505E-10  |
| TcCLB.507653.20  | trans-sialidase, Group II, putative                       | -4,228 | 6,095E-127 |
| TcCLB.510807.40  | mucin TcMUCII, putative                                   | -4,228 | 3,312E-51  |
| TcCLB.508481.20  | mucin-associated surface protein (MASP), putative         | -4,245 | 4,969E-11  |
| TcCLB.510465.140 | mucin-associated surface protein (MASP), putative         | -4,246 | 1,881E-90  |
| TcCLB.509527.10  | mucin TcMUCII, putative                                   | -4,248 | 9,991E-67  |
| TcCLB.506759.140 | 90 kDa surface protein, putative                          | -4,252 | 1,033E-47  |
| TcCLB.511061.40  | trans-sialidase, Group V, putative                        | -4,253 | 7,575E-107 |
| TcCLB.507957.150 | mucin-associated surface protein (MASP), putative         | -4,253 | 6,517E-104 |
| TcCLB.509525.320 | mucin TcMUCII, putative                                   | -4,255 | 7,809E-59  |
| TcCLB.507953.60  | hypothetical protein                                      | -4,257 | 6,733E-63  |
| TcCLB.504035.41  | mucin-associated surface protein (MASP, pseudogene), p    | -4,268 | 1,376E-07  |
| TcCLB.508225.4   | trans-sialidase, putative                                 | -4,271 | 5,364E-130 |
| TcCLB.507875.70  | trans-sialidase, Group VII, putative                      | -4,274 | 5,002E-48  |
| TcCLB.511603.110 | mucin TcMUCII, putative                                   | -4,275 | 3,571E-63  |
| TcCLB.430603.20  | mucin TcMUCII, putative                                   | -4,286 | 1,811E-79  |
| TcCLB.510853.40  | trans-sialidase, Group IV, putative                       | -4,292 | 0          |
| TcCLB.511401.120 | trans-sialidase, Group V, putative                        | -4,295 | 7,64E-130  |
| TcCLB.506737.114 | mucin TcMUCI, putative                                    | -4,296 | 1,248E-158 |
| TcCLB.509115.60  | mucin-like glycoprotein, putative                         | -4,303 | 7,771E-176 |
| TcCLB.503827.30  | mucin TcMUCII, putative                                   | -4,304 | 3,031E-34  |
| TcCLB.506599.420 | mucin-associated surface protein (MASP), putative         | -4,313 | 5,884E-79  |
| TcCLB.472357.10  | trans-sialidase, Group V, putative                        | -4,331 | 2,101E-74  |
| TcCLB.506597.40  | trans-sialidase, Group V, putative                        | -4,334 | 1,441E-17  |
| TcCLB.509281.10  | hypothetical protein                                      | -4,335 | 3,128E-65  |
| TcCLB.508581.30  | beta galactofuranosyl glycosyltransferase (pseudogene), f | -4,335 | 3,266E-16  |
| TcCLB.506757.150 | mucin-associated surface protein (MASP), putative         | -4,34  | 5,208E-230 |
| TcCLB.507121.11  | trans-sialidase, putative (fragment)                      | -4,343 | 3,389E-60  |
| TcCLB.510985.10  | trans-sialidase, putative (fragment)                      | -4,351 | 2,746E-30  |
| TcCLB.506331.130 | trans-sialidase, Group II, putative                       | -4,353 | 1,856E-184 |
| TcCLB.508295.30  | mucin TcMUCII, putative                                   | -4,358 | 1,362E-64  |
| TcCLB.509753.194 | mucin-associated surface protein (MASP), putative         | -4,367 | 8,032E-48  |
| TcCLB.508759.60  | mucin-associated surface protein (MASP), putative         | -4,385 | 7,994E-37  |
| TcCLB.506361.50  | mucin-associated surface protein (MASP), putative         | -4,386 | 4,968E-129 |
| TcCLB.509329.31  | trans-sialidase, putative                                 | -4,388 | 3,444E-70  |
| TcCLB.506839.10  | serine/threonine kinase, putative                         | -4,398 | 7,29E-12   |
| TcCLB.508753.20  | trans-sialidase, Group V, putative                        | -4,405 | 2,376E-159 |
| TcCLB.511563.20  | trans-sialidase (pseudogene), putative                    | -4,406 | 3,149E-40  |
| TcCLB.508109.60  | trans-sialidase, Group V, putative                        | -4,407 | 2,917E-91  |
| TcCLB.506603.40  | trans-sialidase, Group V, putative                        | -4,41  | 4,598E-202 |

|                  |                                                            |        |            |
|------------------|------------------------------------------------------------|--------|------------|
| TcCLB.504031.50  | trans-sialidase, Group V, putative                         | -4,418 | 6,185E-105 |
| TcCLB.506759.70  | mucin TcMUCII, putative                                    | -4,42  | 9,223E-35  |
| TcCLB.510701.10  | mucin-associated surface protein (MASP), putative          | -4,428 | 1,093E-130 |
| TcCLB.508121.150 | trans-sialidase, Group V, putative                         | -4,443 | 2,095E-91  |
| TcCLB.507219.9   | trans-sialidase, putative                                  | -4,446 | 9,592E-58  |
| TcCLB.509313.9   | trans-sialidase (pseudogene), putative                     | -4,448 | 3,27E-23   |
| TcCLB.509601.10  | neutral sphingomyelinase activation associated factor-like | -4,455 | 0          |
| TcCLB.507479.70  | trans-sialidase, Group IV, putative                        | -4,466 | 1,396E-298 |
| TcCLB.508147.150 | mucin-associated surface protein (MASP), putative          | -4,466 | 5,694E-84  |
| TcCLB.507125.10  | trans-sialidase, Group II, putative                        | -4,47  | 0          |
| TcCLB.506501.290 | mucin-associated surface protein (MASP), putative          | -4,485 | 4,716E-114 |
| TcCLB.506799.20  | mucin-like glycoprotein, putative                          | -4,495 | 2,345E-174 |
| TcCLB.435601.10  | trans-sialidase, putative (fragment)                       | -4,496 | 3,039E-137 |
| TcCLB.506973.120 | trans-sialidase, Group V, putative                         | -4,5   | 4,124E-155 |
| TcCLB.510477.10  | surface protease GP63, putative                            | -4,501 | 5,669E-274 |
| TcCLB.509325.10  | mucin-associated surface protein (MASP), putative          | -4,507 | 8,535E-21  |
| TcCLB.507953.100 | trans-sialidase, Group V, putative                         | -4,514 | 2,329E-182 |
| TcCLB.510497.170 | trans-sialidase (pseudogene), putative                     | -4,518 | 1,356E-49  |
| TcCLB.511907.120 | mucin-like glycoprotein, putative                          | -4,524 | 9,782E-163 |
| TcCLB.510935.20  | surface protease GP63, putative                            | -4,53  | 1,172E-253 |
| TcCLB.509115.50  | mucin-like glycoprotein, putative                          | -4,536 | 7,863E-221 |
| TcCLB.511081.10  | mucin-associated surface protein (MASP), putative          | -4,548 | 1,394E-195 |
| TcCLB.506269.40  | mucin-associated surface protein (MASP), putative          | -4,553 | 1,563E-139 |
| TcCLB.508125.30  | mucin TcMUCII, putative                                    | -4,556 | 4,426E-71  |
| TcCLB.511553.200 | mucin-associated surface protein (MASP), putative          | -4,558 | 6,976E-105 |
| TcCLB.511173.10  | trans-sialidase, putative                                  | -4,569 | 1,069E-53  |
| TcCLB.510039.30  | mucin-associated surface protein (MASP), putative          | -4,57  | 1,219E-266 |
| TcCLB.447899.10  | trans-sialidase, putative                                  | -4,57  | 6,19E-66   |
| TcCLB.504755.10  | surface protease GP63, putative                            | -4,571 | 3,441E-33  |
| TcCLB.510205.40  | trans-sialidase, Group V, putative                         | -4,583 | 1,612E-211 |
| TcCLB.509325.16  | elongation factor 1-gamma (EF-1-gamma, pseudogene),        | -4,585 | 6,671E-32  |
| TcCLB.511057.40  | trans-sialidase, Group V, putative                         | -4,588 | 0          |
| TcCLB.503861.40  | trans-sialidase, Group VIII, putative                      | -4,591 | 6,461E-234 |
| TcCLB.506251.70  | trans-sialidase (pseudogene), putative                     | -4,598 | 5,701E-26  |
| TcCLB.509525.380 | mucin TcMUCII, putative                                    | -4,613 | 1,441E-57  |
| TcCLB.511831.10  | trans-sialidase, putative (fragment)                       | -4,618 | 4,699E-168 |
| TcCLB.509527.120 | trans-sialidase, Group V, putative                         | -4,621 | 4,282E-166 |
| TcCLB.506885.210 | trans-sialidase, Group III, putative                       | -4,625 | 5,111E-188 |
| TcCLB.509931.20  | trans-sialidase, Group VIII, putative                      | -4,631 | 9,672E-157 |
| TcCLB.506285.120 | mucin TcMUCII, putative                                    | -4,633 | 5,056E-135 |
| TcCLB.403481.10  | trans-sialidase, putative (fragment)                       | -4,634 | 1,403E-47  |
| TcCLB.507067.60  | mucin-associated surface protein (MASP), putative          | -4,635 | 4,107E-129 |
| TcCLB.510377.370 | mucin TcMUCII, putative                                    | -4,648 | 1,778E-128 |
| TcCLB.507359.20  | surface antigen TASV, putative                             | -4,651 | 7,148E-92  |
| TcCLB.511779.60  | trans-sialidase, Group III, putative                       | -4,658 | 5,423E-97  |

|                  |                                                          |        |            |
|------------------|----------------------------------------------------------|--------|------------|
| TcCLB.506885.140 | trans-sialidase (pseudogene), putative                   | -4,663 | 5,24E-195  |
| TcCLB.508389.90  | surface protease GP63, putative                          | -4,684 | 5,808E-153 |
| TcCLB.510933.120 | surface protease GP63, putative                          | -4,686 | 0          |
| TcCLB.504493.10  | mucin-associated surface protein (MASP), putative (fragn | -4,694 | 6,999E-98  |
| TcCLB.508903.110 | trans-sialidase, putative                                | -4,695 | 7,503E-155 |
| TcCLB.510569.10  | trans-sialidase, putative                                | -4,695 | 3,766E-130 |
| TcCLB.506283.20  | trans-sialidase, putative                                | -4,696 | 8,671E-24  |
| TcCLB.508219.90  | 90 kDa surface protein, putative                         | -4,7   | 1,651E-83  |
| TcCLB.508121.90  | mucin-associated surface protein (MASP, pseudogene), pi  | -4,706 | 5,494E-137 |
| TcCLB.508021.10  | trans-sialidase, putative                                | -4,716 | 2,263E-09  |
| TcCLB.511873.10  | trans-sialidase, Group V, putative                       | -4,74  | 1,169E-189 |
| TcCLB.506643.10  | mucin-associated surface protein (MASP), putative        | -4,742 | 4,259E-34  |
| TcCLB.511835.10  | trans-sialidase, Group VIII, putative                    | -4,75  | 1,7E-60    |
| TcCLB.478463.10  | hypothetical protein                                     | -4,765 | 9,203E-40  |
| TcCLB.506139.110 | mucin-associated surface protein (MASP), putative        | -4,768 | 1,197E-71  |
| TcCLB.508231.120 | trans-sialidase (pseudogene), putative                   | -4,772 | 1,325E-62  |
| TcCLB.510371.100 | mucin-associated surface protein (MASP), putative        | -4,777 | 6,564E-126 |
| TcCLB.506471.120 | trans-sialidase, Group II, putative                      | -4,784 | 1,696E-236 |
| TcCLB.510483.20  | mucin-associated surface protein (MASP), putative        | -4,798 | 1,141E-130 |
| TcCLB.421951.10  | trans-sialidase, putative (fragment)                     | -4,818 | 6,389E-68  |
| TcCLB.455171.9   | trans-sialidase, putative                                | -4,832 | 6,833E-204 |
| TcCLB.506971.20  | surface protease GP63, putative                          | -4,844 | 1,381E-199 |
| TcCLB.507957.240 | mucin-associated surface protein (MASP), putative        | -4,849 | 7,456E-102 |
| TcCLB.505025.150 | trans-sialidase (pseudogene), putative                   | -4,859 | 1,396E-99  |
| TcCLB.510307.240 | trans-sialidase, Group VIII, putative                    | -4,863 | 2,407E-297 |
| TcCLB.506599.50  | mucin-associated surface protein (MASP), putative        | -4,866 | 6,457E-119 |
| TcCLB.508165.430 | trans-sialidase, putative                                | -4,88  | 6,276E-216 |
| TcCLB.511175.10  | mucin-associated surface protein (MASP), putative        | -4,887 | 1,126E-13  |
| TcCLB.506763.290 | mucin TcMUCII, putative                                  | -4,888 | 3,662E-116 |
| TcCLB.508073.10  | surface protease GP63, putative                          | -4,893 | 2,326E-205 |
| TcCLB.507759.10  | trans-sialidase, Group VIII, putative                    | -4,898 | 3,258E-99  |
| TcCLB.509075.31  | hypothetical protein, conserved (pseudogene)             | -4,9   | 1,904E-17  |
| TcCLB.506683.110 | trans-sialidase, Group VIII, putative                    | -4,909 | 0          |
| TcCLB.503429.39  | trans-sialidase, putative                                | -4,926 | 2,319E-154 |
| TcCLB.507357.100 | trans-sialidase, Group V, putative                       | -4,943 | 0          |
| TcCLB.475133.10  | trans-sialidase, putative                                | -4,958 | 2,855E-98  |
| TcCLB.503973.150 | mucin-associated surface protein (MASP), putative        | -4,967 | 2,237E-107 |
| TcCLB.509979.320 | trans-sialidase, Group V, putative                       | -4,971 | 0          |
| TcCLB.509525.180 | mucin TcMUCII, putative                                  | -4,973 | 2,739E-68  |
| TcCLB.506427.10  | trans-sialidase, Group VIII, putative                    | -4,974 | 6,153E-63  |
| TcCLB.507071.140 | mucin-associated surface protein (MASP), putative        | -4,977 | 4,672E-116 |
| TcCLB.504239.140 | mucin-associated surface protein (MASP, pseudogene), pi  | -4,978 | 1,184E-200 |
| TcCLB.509147.40  | surface antigen TASV, putative                           | -4,985 | 0          |
| TcCLB.505365.60  | trans-sialidase, Group VIII, putative                    | -4,986 | 3,959E-27  |
| TcCLB.510693.150 | mucin-associated surface protein (MASP), putative        | -4,992 | 1,55E-29   |

|                  |                                                          |        |            |
|------------------|----------------------------------------------------------|--------|------------|
| TcCLB.508163.250 | trans-sialidase, Group VI, putative                      | -4,994 | 3,333E-261 |
| TcCLB.509123.10  | surface antigen TASV, putative                           | -5,008 | 0          |
| TcCLB.510693.130 | mucin-associated surface protein (MASP), putative        | -5,008 | 1,406E-118 |
| TcCLB.511173.24  | mucin-associated surface protein (MASP), putative        | -5,023 | 9,63E-178  |
| TcCLB.510697.130 | mucin-associated surface protein (MASP), putative        | -5,029 | 1,782E-139 |
| TcCLB.507637.170 | surface protease GP63, putative                          | -5,03  | 1,181E-272 |
| TcCLB.505567.20  | surface protease GP63, putative                          | -5,043 | 1,961E-81  |
| TcCLB.433061.10  | hypothetical protein                                     | -5,043 | 1,441E-71  |
| TcCLB.508581.10  | trans-sialidase, Group VII, putative                     | -5,047 | 4,029E-66  |
| TcCLB.508639.10  | trans-sialidase, putative                                | -5,068 | 1,441E-189 |
| TcCLB.506217.40  | trans-sialidase, Group VIII, putative                    | -5,074 | 1,069E-67  |
| TcCLB.511675.3   | surface antigen TASV, putative                           | -5,076 | 0          |
| TcCLB.508483.40  | retrotransposon hot spot protein (RHS, pseudogene), puta | -5,081 | 2,817E-37  |
| TcCLB.507981.10  | trans-sialidase (pseudogene), putative                   | -5,085 | 4,306E-144 |
| TcCLB.508743.10  | surface antigen TASV, putative                           | -5,089 | 0          |
| TcCLB.511833.10  | trans-sialidase, Group VIII, putative                    | -5,101 | 3,178E-205 |
| TcCLB.509977.30  | mucin-associated surface protein (MASP), putative        | -5,109 | 3,464E-254 |
| TcCLB.506611.70  | surface protease GP63, putative                          | -5,117 | 1,713E-179 |
| TcCLB.510463.240 | mucin-associated surface protein (MASP), putative        | -5,117 | 3,031E-120 |
| TcCLB.507867.5   | trans-sialidase, putative (fragment)                     | -5,123 | 3,018E-07  |
| TcCLB.507957.200 | mucin-associated surface protein (MASP), putative        | -5,124 | 2,123E-37  |
| TcCLB.508221.960 | mucin-associated surface protein (MASP), putative        | -5,125 | 1,585E-224 |
| TcCLB.506877.60  | mucin-associated surface protein (MASP), putative        | -5,135 | 5,316E-250 |
| TcCLB.504039.180 | mucin-associated surface protein (MASP), putative        | -5,147 | 9,035E-298 |
| TcCLB.511375.10  | hypothetical protein (pseudogene)                        | -5,157 | 3,092E-41  |
| TcCLB.507051.11  | trans-sialidase, putative (fragment)                     | -5,16  | 1,565E-40  |
| TcCLB.435051.10  | trans-sialidase, putative (fragment)                     | -5,164 | 4,761E-120 |
| TcCLB.508745.30  | trans-sialidase, Group V, putative                       | -5,168 | 4,076E-142 |
| TcCLB.507069.180 | mucin-associated surface protein (MASP), putative        | -5,175 | 3,919E-107 |
| TcCLB.406115.10  | trans-sialidase, putative (fragment)                     | -5,186 | 7,851E-264 |
| TcCLB.507875.220 | trans-sialidase, Group II, putative                      | -5,187 | 9,453E-252 |
| TcCLB.506397.10  | trans-sialidase, Group II, putative                      | -5,191 | 2,425E-07  |
| TcCLB.506967.100 | mucin-associated surface protein (MASP), putative        | -5,2   | 3,836E-178 |
| TcCLB.510197.30  | trans-sialidase, Group V, putative                       | -5,212 | 3,389E-241 |
| TcCLB.504341.20  | trans-sialidase, putative                                | -5,212 | 7,088E-24  |
| TcCLB.508483.26  | trans-sialidase (pseudogene), putative                   | -5,217 | 1,391E-17  |
| TcCLB.506613.9   | surface protease GP63, putative (fragment)               | -5,218 | 5,468E-164 |
| TcCLB.503783.17  | mucin TcMUCII, putative                                  | -5,251 | 1,802E-92  |
| TcCLB.509737.9   | trans-sialidase, putative (fragment)                     | -5,257 | 2,419E-142 |
| TcCLB.505025.60  | 90 kDa surface protein, putative                         | -5,257 | 1,345E-83  |
| TcCLB.506763.260 | mucin-associated surface protein (MASP), putative        | -5,274 | 0          |
| TcCLB.506449.10  | trans-sialidase, Group III, putative                     | -5,284 | 3,97E-45   |
| TcCLB.508741.440 | surface antigen TASV, putative                           | -5,288 | 0          |
| TcCLB.426675.9   | trans-sialidase, putative                                | -5,294 | 3,745E-193 |
| TcCLB.509977.80  | mucin-associated surface protein (MASP), putative        | -5,3   | 0          |

|                  |                                                         |        |            |
|------------------|---------------------------------------------------------|--------|------------|
| TcCLB.507753.10  | trans-sialidase, Group III, putative                    | -5,301 | 2,469E-92  |
| TcCLB.510021.180 | trans-sialidase, Group V, putative                      | -5,306 | 0          |
| TcCLB.511861.120 | surface antigen TASV, putative                          | -5,309 | 0          |
| TcCLB.510125.20  | trans-sialidase, Group VIII, putative                   | -5,317 | 4,743E-27  |
| TcCLB.509265.120 | trans-sialidase, putative                               | -5,322 | 6,117E-159 |
| TcCLB.504593.10  | trans-sialidase, putative (CRP10)                       | -5,327 | 8,714E-90  |
| TcCLB.505155.4   | trans-sialidase, putative (fragment)                    | -5,331 | 3,879E-103 |
| TcCLB.506471.100 | trans-sialidase, Group II, putative                     | -5,34  | 0          |
| TcCLB.510477.80  | mucin-associated surface protein (MASP), putative       | -5,344 | 2,286E-273 |
| TcCLB.509075.50  | trans-sialidase, Group II, putative                     | -5,349 | 0          |
| TcCLB.425435.10  | trans-sialidase, putative (fragment)                    | -5,36  | 3,398E-200 |
| TcCLB.510635.10  | trans-sialidase, Group VII, putative                    | -5,363 | 1,395E-220 |
| TcCLB.504015.30  | surface protease GP63, putative                         | -5,372 | 0          |
| TcCLB.492827.10  | trans-sialidase, putative (fragment)                    | -5,385 | 3,007E-34  |
| TcCLB.511375.20  | hypothetical protein                                    | -5,388 | 1,379E-146 |
| TcCLB.508081.10  | mucin-associated surface protein (MASP), putative       | -5,402 | 3,731E-24  |
| TcCLB.506253.39  | trans-sialidase, putative (CRP10)                       | -5,416 | 1,551E-81  |
| TcCLB.503601.10  | trans-sialidase, Group V, putative                      | -5,423 | 2,478E-218 |
| TcCLB.505207.10  | trans-sialidase, Group VII, putative                    | -5,432 | 2,91E-271  |
| TcCLB.509979.200 | mucin-associated surface protein (MASP), putative       | -5,435 | 2,713E-304 |
| TcCLB.510275.190 | mucin-associated surface protein (MASP), putative       | -5,45  | 1,202E-114 |
| TcCLB.510213.39  | mucin-associated surface protein (MASP), putative       | -5,453 | 0          |
| TcCLB.510693.40  | 90 kDa surface protein, putative                        | -5,468 | 6,689E-122 |
| TcCLB.511603.450 | trans-sialidase, Group V, putative                      | -5,475 | 4,304E-114 |
| TcCLB.510021.220 | trans-sialidase, Group V, putative                      | -5,49  | 1,913E-268 |
| TcCLB.509549.10  | trans-sialidase, Group V, putative                      | -5,505 | 0          |
| TcCLB.506813.140 | trans-sialidase, Group VII, putative                    | -5,528 | 1,155E-201 |
| TcCLB.509225.11  | trans-sialidase, putative                               | -5,539 | 1,491E-172 |
| TcCLB.505779.20  | trans-sialidase, Group II, putative                     | -5,544 | 0          |
| TcCLB.507833.10  | mucin-associated surface protein (MASP), putative       | -5,544 | 2,079E-118 |
| TcCLB.508365.190 | trans-sialidase, Group VI, putative                     | -5,554 | 1,991E-185 |
| TcCLB.510483.360 | trans-sialidase, Group VII, putative                    | -5,569 | 0          |
| TcCLB.508117.20  | mucin-associated surface protein (MASP, pseudogene), pi | -5,57  | 8,473E-227 |
| TcCLB.510377.134 | mucin-associated surface protein (MASP), putative       | -5,59  | 3,03E-116  |
| TcCLB.506597.9   | trans-sialidase, putative (fragment)                    | -5,59  | 5,786E-15  |
| TcCLB.504427.230 | trans-sialidase, Group VIII, putative                   | -5,595 | 2,012E-66  |
| TcCLB.510907.10  | trans-sialidase, Group VIII, putative                   | -5,6   | 7,685E-54  |
| TcCLB.510489.5   | mucin-associated surface protein (MASP), putative       | -5,602 | 1,629E-12  |
| TcCLB.506599.330 | mucin-associated surface protein (MASP), putative       | -5,604 | 0          |
| TcCLB.506499.170 | trans-sialidase, Group V, putative                      | -5,621 | 3,098E-258 |
| TcCLB.505779.10  | trans-sialidase, Group II, putative                     | -5,629 | 0          |
| TcCLB.507479.20  | trans-sialidase, Group II, putative                     | -5,644 | 7,786E-162 |
| TcCLB.503427.9   | trans-sialidase, putative (fragment)                    | -5,664 | 1,069E-290 |
| TcCLB.507095.10  | hypothetical protein (fragment)                         | -5,682 | 0          |
| TcCLB.506757.50  | mucin-associated surface protein (MASP), putative       | -5,709 | 1,602E-284 |



|                  |                                                   |        |            |
|------------------|---------------------------------------------------|--------|------------|
| TcCLB.508365.100 | surface protease GP63, putative                   | -5,71  | 1,234E-51  |
| TcCLB.506703.20  | mucin-associated surface protein (MASP), putative | -5,716 | 2,745E-160 |
| TcCLB.508165.310 | surface protease GP63, putative                   | -5,728 | 0          |
| TcCLB.424499.10  | mucin-associated surface protein (MASP), putative | -5,75  | 1,262E-192 |
| TcCLB.509875.80  | trans-sialidase, Group II, putative               | -5,764 | 0          |
| TcCLB.506347.5   | trans-sialidase, putative (fragment)              | -5,767 | 6,701E-295 |
| TcCLB.508061.154 | trans-sialidase, putative (fragment)              | -5,769 | 1,2E-285   |
| TcCLB.506003.39  | trans-sialidase, putative (fragment)              | -5,773 | 1,748E-53  |
| TcCLB.460061.20  | trans-sialidase, putative (fragment)              | -5,804 | 6,051E-49  |
| TcCLB.511077.7   | trans-sialidase, putative (fragment)              | -5,817 | 8,225E-09  |
| TcCLB.504587.30  | mucin-associated surface protein (MASP), putative | -5,837 | 0          |
| TcCLB.508285.60  | trans-sialidase, Group II, putative               | -5,84  | 2,808E-283 |
| TcCLB.506341.50  | trans-sialidase, Group VIII, putative             | -5,846 | 0          |
| TcCLB.506537.200 | trans-sialidase, Group VIII, putative             | -5,856 | 0          |
| TcCLB.511059.10  | trans-sialidase, putative                         | -5,877 | 1,341E-113 |
| TcCLB.506757.120 | trans-sialidase, Group V, putative                | -5,906 | 0          |
| TcCLB.506653.10  | trans-sialidase, putative                         | -5,909 | 2,963E-97  |
| TcCLB.508737.10  | surface antigen TASV-C2, putative (TASV-C2)       | -5,917 | 0          |
| TcCLB.511855.10  | trans-sialidase, putative                         | -5,934 | 1,463E-146 |
| TcCLB.506615.100 | mucin-associated surface protein (MASP), putative | -5,953 | 0          |
| TcCLB.511781.31  | trans-sialidase (pseudogene), putative            | -5,953 | 8,288E-18  |
| TcCLB.508139.240 | trans-sialidase, Group II, putative               | -5,963 | 0          |
| TcCLB.511081.60  | mucin-associated surface protein (MASP), putative | -5,978 | 5,619E-194 |
| TcCLB.508221.790 | trans-sialidase, Group V, putative                | -5,988 | 8,205E-94  |
| TcCLB.509979.270 | mucin-associated surface protein (MASP), putative | -6,001 | 0          |
| TcCLB.508139.250 | trans-sialidase, Group II, putative               | -6,002 | 0          |
| TcCLB.506763.30  | mucin-associated surface protein (MASP), putative | -6,002 | 9,574E-100 |
| TcCLB.402449.10  | trans-sialidase (pseudogene), putative            | -6,004 | 0          |
| TcCLB.511877.10  | surface antigen TASV-B2 (TASV-B2)                 | -6,008 | 0          |
| TcCLB.511859.120 | mucin-like glycoprotein, putative                 | -6,013 | 0          |
| TcCLB.510979.40  | trans-sialidase, Group V, putative                | -6,019 | 0          |
| TcCLB.504145.10  | trans-sialidase, Group II, putative               | -6,028 | 1,544E-35  |
| TcCLB.505231.20  | trans-sialidase, Group II, putative               | -6,035 | 0          |
| TcCLB.440083.10  | trans-sialidase, putative (fragment)              | -6,053 | 0          |
| TcCLB.509525.420 | mucin TcMUCII, putative                           | -6,062 | 2,787E-93  |
| TcCLB.503759.10  | trans-sialidase, Group II, putative               | -6,066 | 0          |
| TcCLB.511197.10  | trans-sialidase, putative                         | -6,078 | 2,379E-252 |
| TcCLB.506961.150 | trans-sialidase, Group VIII, putative             | -6,098 | 0          |
| TcCLB.511587.90  | trans-sialidase, Group VIII, putative             | -6,098 | 0          |
| TcCLB.476911.10  | trans-sialidase, putative (fragment)              | -6,111 | 6,192E-83  |
| TcCLB.457113.10  | trans-sialidase, putative (fragment)              | -6,161 | 2,619E-33  |
| TcCLB.507505.10  | trans-sialidase, putative                         | -6,166 | 1,094E-29  |
| TcCLB.510157.5   | trans-sialidase, putative (fragment)              | -6,193 | 1,654E-20  |
| TcCLB.508481.10  | trans-sialidase, Group IV, putative               | -6,2   | 1,001E-32  |
| TcCLB.505853.10  | trans-sialidase, putative (fragment)              | -6,211 | 0          |

|                  |                                                   |        |            |
|------------------|---------------------------------------------------|--------|------------|
| TcCLB.510213.70  | mucin-associated surface protein (MASP), putative | -6,243 | 0          |
| TcCLB.509075.40  | mucin-associated surface protein (MASP), putative | -6,255 | 4,271E-08  |
| TcCLB.510943.206 | trans-sialidase, putative                         | -6,258 | 5,225E-58  |
| TcCLB.505573.10  | trans-sialidase, putative (fragment)              | -6,28  | 0          |
| TcCLB.504189.5   | trans-sialidase, putative (fragment)              | -6,345 | 2,275E-147 |
| TcCLB.510279.320 | trans-sialidase, Group V, putative                | -6,347 | 0          |
| TcCLB.511185.80  | trans-sialidase, Group V, putative                | -6,434 | 0          |
| TcCLB.508163.400 | surface antigen TASV-B1, putative                 | -6,44  | 2,486E-301 |
| TcCLB.506757.60  | trans-sialidase, Group V, putative                | -6,446 | 0          |
| TcCLB.507981.40  | hypothetical protein                              | -6,501 | 3,263E-23  |
| TcCLB.508081.50  | mucin-associated surface protein (MASP), putative | -6,516 | 9,32E-280  |
| TcCLB.507477.5   | trans-sialidase, putative                         | -6,535 | 3,787E-52  |
| TcCLB.508521.100 | trans-sialidase, Group VIII, putative             | -6,592 | 1,699E-98  |
| TcCLB.508081.90  | mucin-associated surface protein (MASP), putative | -6,599 | 9,928E-298 |
| TcCLB.432995.9   | trans-sialidase, putative                         | -6,617 | 2,567E-107 |
| TcCLB.506973.10  | trans-sialidase, Group V, putative                | -6,662 | 0          |
| TcCLB.506717.80  | trans-sialidase, Group VIII, putative             | -6,667 | 0          |
| TcCLB.510359.650 | mucin-associated surface protein (MASP), putative | -6,674 | 2,367E-144 |
| TcCLB.509281.20  | trans-sialidase, Group II, putative               | -6,685 | 4,222E-296 |
| TcCLB.511551.50  | trans-sialidase (pseudogene), putative            | -6,687 | 1,416E-29  |
| TcCLB.508757.10  | trans-sialidase (pseudogene), putative            | -6,717 | 2,09E-69   |
| TcCLB.509629.10  | trans-sialidase, Group III, putative              | -6,724 | 1,022E-87  |
| TcCLB.503655.30  | mucin-like glycoprotein, putative                 | -6,746 | 5,285E-124 |
| TcCLB.509187.10  | trans-sialidase, Group II, putative               | -6,759 | 2,624E-69  |
| TcCLB.509081.166 | trans-sialidase, putative (fragment)              | -6,776 | 3,782E-261 |
| TcCLB.511547.20  | trans-sialidase, Group IV, putative               | -6,789 | 2,601E-104 |
| TcCLB.507611.170 | trans-sialidase, Group II, putative               | -6,834 | 1,494E-140 |
| TcCLB.511757.100 | trans-sialidase, putative (fragment)              | -6,861 | 0          |
| TcCLB.509663.50  | trans-sialidase, Group VIII, putative             | -6,876 | 0          |
| TcCLB.511875.20  | trans-sialidase, Group VII, putative              | -6,937 | 0          |
| TcCLB.506537.80  | trans-sialidase, Group II, putative               | -6,949 | 0          |
| TcCLB.508999.170 | surface protease GP63, putative                   | -6,994 | 8,021E-10  |
| TcCLB.507981.30  | hypothetical protein                              | -7,01  | 1,317E-41  |
| TcCLB.510713.30  | trans-sialidase, Group VII, putative              | -7,023 | 0          |
| TcCLB.508081.30  | mucin-associated surface protein (MASP), putative | -7,046 | 1,886E-49  |
| TcCLB.505609.10  | trans-sialidase, Group II, putative               | -7,193 | 1,018E-42  |
| TcCLB.506871.190 | hypothetical protein                              | -7,268 | 0          |
| TcCLB.510025.160 | mucin-associated surface protein (MASP), putative | -7,275 | 1,448E-90  |
| TcCLB.508081.70  | mucin-associated surface protein (MASP), putative | -7,296 | 7,893E-101 |
| TcCLB.507095.30  | trans-sialidase, putative (fragment)              | -7,331 | 0          |
| TcCLB.423205.10  | trans-sialidase, putative (fragment)              | -7,337 | 7,007E-21  |
| TcCLB.399173.10  | trans-sialidase, putative (fragment)              | -7,435 | 0          |
| TcCLB.507839.40  | trans-sialidase, Group II, putative               | -7,475 | 0          |
| TcCLB.506723.20  | trans-sialidase, Group VII, putative              | -7,537 | 0          |
| TcCLB.484097.10  | trans-sialidase, putative (fragment)              | -7,593 | 0          |

|                  |                                            |        |            |
|------------------|--------------------------------------------|--------|------------|
| TcCLB.506289.94  | mucin-like glycoprotein, putative          | -7,604 | 4,24E-138  |
| TcCLB.507283.10  | trans-sialidase, Group V, putative         | -7,624 | 0          |
| TcCLB.508485.10  | trans-sialidase, Group II, putative        | -7,658 | 2,17E-56   |
| TcCLB.510163.60  | trans-sialidase, Group V, putative         | -7,728 | 0          |
| TcCLB.509377.20  | trans-sialidase, Group VII, putative       | -7,733 | 1,737E-39  |
| TcCLB.509821.20  | trans-sialidase (pseudogene), putative     | -7,849 | 0          |
| TcCLB.511257.110 | mucin-like glycoprotein, putative          | -8,066 | 8,102E-200 |
| TcCLB.507511.50  | hypothetical protein                       | -8,07  | 0          |
| TcCLB.509325.4   | surface protease GP63, putative (fragment) | -8,3   | 6,673E-11  |
| TcCLB.508163.330 | surface protease GP63, putative            | -8,718 | 1,704E-196 |
| TcCLB.508581.40  | trans-sialidase, Group II, putative        | -8,947 | 4,669E-25  |
| TcCLB.509157.170 | trans-sialidase, Group VIII, putative      | -9,251 | 1,816E-153 |

**Supplementary Table 3. Gene ontology (GO) Enrichment Analysis of DE genes in CL Brener epimastigotes compared to trypomastigotes and amastigotes.**

# BP Results from goseq.

| row.names  | term                        | over.p.value | de.genes.in.cat                                                                                                                                                                                                                                                                                                                                                                                                                                                                                                                          |
|------------|-----------------------------|--------------|------------------------------------------------------------------------------------------------------------------------------------------------------------------------------------------------------------------------------------------------------------------------------------------------------------------------------------------------------------------------------------------------------------------------------------------------------------------------------------------------------------------------------------------|
| GO:0055114 | oxidation-reduction process | 1,444E-30    | TcCLB.506357.50,<br>TcCLB.511277.60,<br>TcCLB.507047.150,<br>TcCLB.510855.10,<br>TcCLB.504425.60,<br>TcCLB.509179.100,<br>TcCLB.506213.50,<br>TcCLB.506629.200,<br>TcCLB.511817.40,<br>TcCLB.511287.49,<br>TcCLB.506937.10,<br>TcCLB.511691.39,<br>TcCLB.508535.10,<br>TcCLB.506147.9,<br>TcCLB.506779.200,<br>TcCLB.509207.90,<br>TcCLB.508461.80,<br>TcCLB.510213.110,<br>TcCLB.509239.10,<br>TcCLB.507019.20,<br>TcCLB.507617.9,<br>TcCLB.506263.10,<br>TcCLB.506367.30,<br>TcCLB.509611.180,<br>TcCLB.508821.40,<br>TcCLB.510943.50. |

|            |                   |           |                                                                                                                                                                                                                                                                                                                                                                                                                                                                                                                                               |
|------------|-------------------|-----------|-----------------------------------------------------------------------------------------------------------------------------------------------------------------------------------------------------------------------------------------------------------------------------------------------------------------------------------------------------------------------------------------------------------------------------------------------------------------------------------------------------------------------------------------------|
| GO:0008152 | metabolic process | 2,757E-24 | TcCLB.510257.80,<br>TcCLB.509213.120,<br>TcCLB.511391.120,<br>TcCLB.507689.40,<br>TcCLB.510837.9,<br>TcCLB.509205.120,<br>TcCLB.507689.50,<br>TcCLB.506559.410,<br>TcCLB.507689.30,<br>TcCLB.507657.20,<br>TcCLB.508601.141,<br>TcCLB.507657.10,<br>TcCLB.508699.120,<br>TcCLB.510837.20,<br>TcCLB.506513.110,<br>TcCLB.508805.80,<br>TcCLB.508919.10,<br>TcCLB.506593.60,<br>TcCLB.511691.10,<br>TcCLB.506905.50,<br>TcCLB.505945.20,<br>TcCLB.510381.10,<br>TcCLB.508241.140,<br>TcCLB.508177.110,<br>TcCLB.506931.10,<br>TcCLB.508177.120. |
|------------|-------------------|-----------|-----------------------------------------------------------------------------------------------------------------------------------------------------------------------------------------------------------------------------------------------------------------------------------------------------------------------------------------------------------------------------------------------------------------------------------------------------------------------------------------------------------------------------------------------|

|            |                                       |           |                                                                                                                                                                                                                                                                                                                                                                                                                                                                                                                                        |
|------------|---------------------------------------|-----------|----------------------------------------------------------------------------------------------------------------------------------------------------------------------------------------------------------------------------------------------------------------------------------------------------------------------------------------------------------------------------------------------------------------------------------------------------------------------------------------------------------------------------------------|
| GO:0055085 | transmembrane transport               | 9,384E-16 | TcCLB.510103.24,<br>TcCLB.509713.30,<br>TcCLB.506551.10,<br>TcCLB.510811.20,<br>TcCLB.508799.270,<br>TcCLB.509707.10,<br>TcCLB.508065.70,<br>TcCLB.508799.290,<br>TcCLB.509107.9,<br>TcCLB.510605.10,<br>TcCLB.506947.10,<br>TcCLB.511639.20,<br>TcCLB.511041.40,<br>TcCLB.510069.20,<br>TcCLB.510877.170,<br>TcCLB.507527.50,<br>TcCLB.509197.20,<br>TcCLB.508465.40,<br>TcCLB.509197.10,<br>TcCLB.508689.40,<br>TcCLB.508231.9,<br>TcCLB.508701.20,<br>TcCLB.508551.39,<br>TcCLB.506355.100,<br>TcCLB.508551.30,<br>TcCLB.506355.10. |
| GO:0006520 | cellular amino acid metabolic process | 5,366E-10 | TcCLB.510795.10,<br>TcCLB.510187.40,<br>TcCLB.510565.11,<br>TcCLB.510187.70,<br>TcCLB.510187.20,<br>TcCLB.510741.10,<br>TcCLB.510739.19,<br>TcCLB.510661.250,<br>TcCLB.507091.50,<br>TcCLB.508111.30,<br>TcCLB.511643.30,<br>TcCLB.507875.20                                                                                                                                                                                                                                                                                           |

|            |                         |           |                                                                                                                                                                                                                                                                                                                                                                                            |
|------------|-------------------------|-----------|--------------------------------------------------------------------------------------------------------------------------------------------------------------------------------------------------------------------------------------------------------------------------------------------------------------------------------------------------------------------------------------------|
| GO:0006629 | lipid metabolic process | 2,431E-08 | TcCLB.510679.100,<br>TcCLB.511437.30,<br>TcCLB.511075.9,<br>TcCLB.509239.10,<br>TcCLB.505615.20,<br>TcCLB.440101.10,<br>TcCLB.429257.20,<br>TcCLB.508737.70,<br>TcCLB.507609.40,<br>TcCLB.510181.20,<br>TcCLB.511439.30,<br>TcCLB.507089.210,<br>TcCLB.508503.10,<br>TcCLB.510795.30,<br>TcCLB.509331.70,<br>TcCLB.510359.340,<br>TcCLB.510565.20,<br>TcCLB.504427.70,<br>TcCLB.504149.160 |
| GO:0009058 | biosynthetic process    | 5,079E-08 | TcCLB.510795.10,<br>TcCLB.510187.40,<br>TcCLB.503747.10,<br>TcCLB.508535.50,<br>TcCLB.510565.11,<br>TcCLB.506247.220,<br>TcCLB.509041.10,<br>TcCLB.509043.10,<br>TcCLB.510187.70,<br>TcCLB.510187.20,<br>TcCLB.510945.70,<br>TcCLB.508257.10,<br>TcCLB.506529.430,<br>TcCLB.506529.420,<br>TcCLB.506959.70,<br>TcCLB.506405.50,<br>TcCLB.503453.100                                        |



|            |                               |           |                                                                                                                                                                                                       |
|------------|-------------------------------|-----------|-------------------------------------------------------------------------------------------------------------------------------------------------------------------------------------------------------|
| GO:0006526 | arginine biosynthetic process | 1,321E-07 | TcCLB.511391.120,<br>TcCLB.507689.40,<br>TcCLB.507689.30,<br>TcCLB.507657.20,<br>TcCLB.507657.10,<br>TcCLB.510837.20,<br>TcCLB.508971.40,<br>TcCLB.507059.80                                          |
| GO:0006839 | mitochondrial transport       | 6,289E-07 | TcCLB.511687.19,<br>TcCLB.508741.229,<br>TcCLB.508737.210,<br>TcCLB.509141.40,<br>TcCLB.511687.10,<br>TcCLB.509129.10                                                                                 |
| GO:0009116 | nucleoside metabolic process  | 6,038E-07 | TcCLB.509569.100,<br>TcCLB.507519.150,<br>TcCLB.506789.280,<br>TcCLB.508387.20,<br>TcCLB.507739.40,<br>TcCLB.508207.70,<br>TcCLB.506865.2,<br>TcCLB.508989.9,<br>TcCLB.507773.60,<br>TcCLB.506435.410 |
| GO:0016559 | peroxisome fission            | 2,064E-06 | TcCLB.510669.49,<br>TcCLB.510669.20,<br>TcCLB.508461.570,<br>TcCLB.509203.40,<br>TcCLB.507009.10,<br>TcCLB.511017.50                                                                                  |

|            |                                            |           |                                                                                                                                                                                                                                                                                                            |
|------------|--------------------------------------------|-----------|------------------------------------------------------------------------------------------------------------------------------------------------------------------------------------------------------------------------------------------------------------------------------------------------------------|
| GO:0005975 | carbohydrate metabolic process             | 1,369E-05 | TcCLB.506937.10,<br>TcCLB.503713.30,<br>TcCLB.510667.140,<br>TcCLB.506195.120,<br>TcCLB.510437.40,<br>TcCLB.508257.70,<br>TcCLB.510283.70,<br>TcCLB.507009.30,<br>TcCLB.503823.40,<br>TcCLB.506407.10,<br>TcCLB.509199.24,<br>TcCLB.508569.80,<br>TcCLB.511531.50,<br>TcCLB.508601.119,<br>TcCLB.508951.20 |
| GO:0006811 | ion transport                              | 1,937E-05 | TcCLB.511687.19,<br>TcCLB.508741.229,<br>TcCLB.508737.210,<br>TcCLB.509141.40,<br>TcCLB.511687.10,<br>TcCLB.509129.10                                                                                                                                                                                      |
| GO:0006626 | protein targeting to mitochondrion         | 0,0004091 | TcCLB.506399.80,<br>TcCLB.511909.50,<br>TcCLB.506399.70,<br>TcCLB.511909.60,<br>TcCLB.508647.110,<br>TcCLB.511807.253                                                                                                                                                                                      |
| GO:0006094 | gluconeogenesis                            | 0,0009519 | TcCLB.506775.180,<br>TcCLB.508441.20,<br>TcCLB.507547.90,<br>TcCLB.506529.508                                                                                                                                                                                                                              |
| GO:0033617 | mitochondrial respiratory chain complex IV | 0,0013959 | TcCLB.509721.40,<br>TcCLB.511395.20,<br>TcCLB.510173.70,<br>TcCLB.506041.50                                                                                                                                                                                                                                |
| GO:0006633 | fatty acid biosynthetic process            | 0,0016028 | TcCLB.509239.10,<br>TcCLB.507609.40,<br>TcCLB.510181.20,<br>TcCLB.510795.30,<br>TcCLB.473111.10,<br>TcCLB.510565.20                                                                                                                                                                                        |

|            |                                |           |                                                                                                                                                                                                                                |
|------------|--------------------------------|-----------|--------------------------------------------------------------------------------------------------------------------------------------------------------------------------------------------------------------------------------|
| GO:0046835 | carbohydrate phosphorylation   | 0,0016251 | TcCLB.510667.120,<br>TcCLB.507009.40,<br>TcCLB.507001.110                                                                                                                                                                      |
| GO:0006470 | protein dephosphorylation      | 0,0019032 | TcCLB.509205.120,<br>TcCLB.508601.141,<br>TcCLB.508699.120,<br>TcCLB.503471.10,<br>TcCLB.509109.130,<br>TcCLB.510603.60,<br>TcCLB.503657.70,<br>TcCLB.509109.120,<br>TcCLB.506779.110,<br>TcCLB.506743.110,<br>TcCLB.510603.80 |
| GO:0006098 | pentose-phosphate shunt        | 0,0024448 | TcCLB.503713.30,<br>TcCLB.505807.180,<br>TcCLB.509199.24,<br>TcCLB.507017.40,<br>TcCLB.508601.119                                                                                                                              |
| GO:0009987 | cellular process               | 0,0023817 | TcCLB.510655.120,<br>TcCLB.510751.4,<br>TcCLB.510749.99,<br>TcCLB.507081.110,<br>TcCLB.503991.20                                                                                                                               |
| GO:0006825 | copper ion transport           | 0,00309   | TcCLB.509463.20,<br>TcCLB.510507.29,<br>TcCLB.506649.50                                                                                                                                                                        |
| GO:0006013 | mannose metabolic process      | 0,0057466 | TcCLB.506195.120,<br>TcCLB.506407.10                                                                                                                                                                                           |
| GO:0006471 | protein ADP-ribosylation       | 0,0057466 | TcCLB.509721.60,<br>TcCLB.510173.90                                                                                                                                                                                            |
| GO:0006537 | glutamate biosynthetic process | 0,0057466 | TcCLB.511237.30,<br>TcCLB.506411.30                                                                                                                                                                                            |
| GO:0006548 | histidine catabolic process    | 0,005746  | TcCLB.506247.220,<br>TcCLB.504045.110                                                                                                                                                                                          |
| GO:0006561 | proline biosynthetic process   | 0,003419  | TcCLB.509207.90,<br>TcCLB.510943.50,<br>TcCLB.506857.20                                                                                                                                                                        |
| GO:0006562 | proline catabolic process      | 0,0057466 | TcCLB.511237.30,<br>TcCLB.506411.30                                                                                                                                                                                            |
| GO:0006566 | threonine metabolic process    | 0,0052542 | TcCLB.503597.10,<br>TcCLB.509167.150                                                                                                                                                                                           |

|            |                                             |           |                                                           |
|------------|---------------------------------------------|-----------|-----------------------------------------------------------|
| GO:0006665 | sphingolipid metabolic process              | 0,0044199 | TcCLB.508257.10,<br>TcCLB.506405.50                       |
| GO:0006783 | heme biosynthetic process                   | 0,0055176 | TcCLB.509601.59,<br>TcCLB.509767.59                       |
| GO:0006807 | nitrogen compound metabolic process         | 0,0034532 | TcCLB.510039.40,<br>TcCLB.509979.150,<br>TcCLB.503405.10  |
| GO:0006874 | cellular calcium ion homeostasis            | 0,0057466 | TcCLB.511385.30,<br>TcCLB.510773.20                       |
| GO:0007131 | reciprocal meiotic recombination            | 0,0053436 | TcCLB.506885.310,<br>TcCLB.510729.110                     |
| GO:0009229 | thiamine diphosphate biosynthetic process   | 0,0056933 | TcCLB.511051.59,<br>TcCLB.509683.124                      |
| GO:0009443 | pyridoxal 5'-phosphate salvage              | 0,0049909 | TcCLB.509059.50,<br>TcCLB.507925.40                       |
| GO:0019556 | histidine catabolic process to glutamate an | 0,005645  | TcCLB.508741.140,<br>TcCLB.509137.30                      |
| GO:0019571 | D-arabinose catabolic process               | 0,0048368 | TcCLB.506213.50,<br>TcCLB.511287.49                       |
| GO:0019853 | L-ascorbic acid biosynthetic process        | 0,0057379 | TcCLB.507047.150,<br>TcCLB.509179.100                     |
| GO:0046951 | ketone body biosynthetic process            | 0,0046754 | TcCLB.507049.60,<br>TcCLB.506567.70                       |
| GO:0048034 | heme O biosynthetic process                 | 0,0055176 | TcCLB.509601.59,<br>TcCLB.509767.59                       |
| GO:0050790 | regulation of catalytic activity            | 0,0052349 | TcCLB.510535.100,<br>TcCLB.511827.100                     |
| GO:0051452 | intracellular pH reduction                  | 0,0057466 | TcCLB.511385.30,<br>TcCLB.510773.20                       |
| GO:0033955 | mitochondrial DNA inheritance               | 0,0069773 | TcCLB.503781.80,<br>TcCLB.507639.30,<br>TcCLB.503781.90   |
| GO:0006012 | galactose metabolic process                 | 0,0071128 | TcCLB.510667.120,<br>TcCLB.507009.40,<br>TcCLB.507001.110 |

|            |                                           |           |                                                                                                                                                                                                                                                                                                                                                                                                                                                                                                                                             |
|------------|-------------------------------------------|-----------|---------------------------------------------------------------------------------------------------------------------------------------------------------------------------------------------------------------------------------------------------------------------------------------------------------------------------------------------------------------------------------------------------------------------------------------------------------------------------------------------------------------------------------------------|
| GO:0006468 | protein phosphorylation                   | 0,0083465 | TcCLB.508405.70,<br>TcCLB.507837.20,<br>TcCLB.508831.110,<br>TcCLB.508621.10,<br>TcCLB.511671.80,<br>TcCLB.510345.9,<br>TcCLB.511301.90,<br>TcCLB.510861.140,<br>TcCLB.510155.160,<br>TcCLB.503943.10,<br>TcCLB.511837.90,<br>TcCLB.510609.70,<br>TcCLB.507211.20,<br>TcCLB.503617.10,<br>TcCLB.506835.159,<br>TcCLB.506401.110,<br>TcCLB.505193.110,<br>TcCLB.508153.740,<br>TcCLB.506999.180,<br>TcCLB.511351.30,<br>TcCLB.506469.80,<br>TcCLB.511573.40,<br>TcCLB.510759.40,<br>TcCLB.476421.9,<br>TcCLB.506633.10,<br>TcCLB.511277.140. |
| GO:0022900 | electron transport chain                  | 0,0127825 | TcCLB.509721.40,<br>TcCLB.510173.70                                                                                                                                                                                                                                                                                                                                                                                                                                                                                                         |
| GO:0016311 | dephosphorylation                         | 0,0132844 | TcCLB.503471.10,<br>TcCLB.509109.130,<br>TcCLB.510603.60,<br>TcCLB.503657.70,<br>TcCLB.509109.120,<br>TcCLB.506779.110,<br>TcCLB.506743.110,<br>TcCLB.510603.80                                                                                                                                                                                                                                                                                                                                                                             |
| GO:0009072 | aromatic amino acid family metabolic proc | 0,01599   | TcCLB.510795.10,<br>TcCLB.510187.40                                                                                                                                                                                                                                                                                                                                                                                                                                                                                                         |
| GO:0006518 | peptide metabolic process                 | 0,0162322 | TcCLB.504045.60,<br>TcCLB.506513.110                                                                                                                                                                                                                                                                                                                                                                                                                                                                                                        |
| GO:0016310 | phosphorylation                           | 0,0163425 | TcCLB.510101.140,<br>TcCLB.506297.190                                                                                                                                                                                                                                                                                                                                                                                                                                                                                                       |

|            |                                              |           |                                                                                                                       |
|------------|----------------------------------------------|-----------|-----------------------------------------------------------------------------------------------------------------------|
| GO:0030001 | metal ion transport                          | 0,0172671 | TcCLB.507527.50,<br>TcCLB.509197.20,<br>TcCLB.509197.10,<br>TcCLB.508701.20,<br>TcCLB.509437.60,<br>TcCLB.509437.70   |
| GO:0015937 | coenzyme A biosynthetic process              | 0,0174559 | TcCLB.506779.80,<br>TcCLB.511277.500,<br>TcCLB.507021.110                                                             |
| GO:0006729 | tetrahydrobiopterin biosynthetic process     | 0,0211556 | TcCLB.511575.10,<br>TcCLB.503613.40                                                                                   |
| GO:0044237 | cellular metabolic process                   | 0,0257878 | TcCLB.507923.10,<br>TcCLB.511753.120,<br>TcCLB.508119.120,<br>TcCLB.510349.10,<br>TcCLB.511019.84,<br>TcCLB.503925.40 |
| GO:0008535 | respiratory chain complex IV assembly        | 0,0267534 | TcCLB.508995.60,<br>TcCLB.506649.50                                                                                   |
| GO:0042759 | long-chain fatty acid biosynthetic process   | 0,0272799 | TcCLB.511245.130,<br>TcCLB.506661.30                                                                                  |
| GO:0006298 | mismatch repair                              | 0,028402  | TcCLB.507233.110,<br>TcCLB.509693.209,<br>TcCLB.509967.20,<br>TcCLB.511911.30                                         |
| GO:0031388 | organic acid phosphorylation                 | 0,0310156 | TcCLB.508741.170,<br>TcCLB.509139.10                                                                                  |
| GO:0008299 | isoprenoid biosynthetic process              | 0,031864  | TcCLB.509237.10,<br>TcCLB.511071.50,<br>TcCLB.511823.70,<br>TcCLB.511903.40                                           |
| GO:0006725 | cellular aromatic compound metabolic process | 0,0403494 | TcCLB.503991.39,<br>TcCLB.507081.130                                                                                  |
| GO:0007035 | vacuolar acidification                       | 0,0519264 | TcCLB.510993.10                                                                                                       |
| GO:0006643 | membrane lipid metabolic process             | 0,0539014 | TcCLB.503929.79                                                                                                       |
| GO:0019538 | protein metabolic process                    | 0,0540045 | TcCLB.510855.10,<br>TcCLB.509611.180                                                                                  |
| GO:0000723 | telomere maintenance                         | 0,0561425 | TcCLB.508827.50,<br>TcCLB.506775.100,<br>TcCLB.503677.20                                                              |

|            |                                               |           |                                                                               |
|------------|-----------------------------------------------|-----------|-------------------------------------------------------------------------------|
| GO:0006259 | DNA metabolic process                         | 0,057713  | TcCLB.506885.310,<br>TcCLB.510729.110,<br>TcCLB.509779.10,<br>TcCLB.511653.69 |
| GO:0009052 | pentose-phosphate shunt, non-oxidative branch | 0,0579039 | TcCLB.509199.24                                                               |
| GO:0006735 | NADH regeneration                             | 0,0595221 | TcCLB.508601.50                                                               |
| GO:0002082 | regulation of oxidative phosphorylation       | 0,0663701 | TcCLB.508823.70                                                               |
| GO:0006784 | heme a biosynthetic process                   | 0,0744994 | TcCLB.511211.70                                                               |
| GO:0010040 | response to iron(II) ion                      | 0,0758265 | TcCLB.507951.299                                                              |
| GO:0015819 | lysine transport                              | 0,0755383 | TcCLB.511545.80                                                               |
| GO:0018171 | peptidyl-cysteine oxidation                   | 0,0758265 | TcCLB.507951.299                                                              |
| GO:0051156 | glucose 6-phosphate metabolic process         | 0,0739662 | TcCLB.510187.100                                                              |
| GO:0009165 | nucleotide biosynthetic process               | 0,0784136 | TcCLB.509153.90,<br>TcCLB.507773.60                                           |
| GO:0009435 | NAD biosynthetic process                      | 0,0831196 | TcCLB.506593.60,<br>TcCLB.506829.80                                           |
| GO:0006696 | ergosterol biosynthetic process               | 0,0891041 | TcCLB.511071.50,<br>TcCLB.511903.40                                           |

# MF Results from goseq.

| row.names  | term                    | over.p.value | de.genes.in.cat                                                                                                                                                                                                                                                                                                                                                                                                                                                                                                                                                                                                                                                                                                                                                                                         |
|------------|-------------------------|--------------|---------------------------------------------------------------------------------------------------------------------------------------------------------------------------------------------------------------------------------------------------------------------------------------------------------------------------------------------------------------------------------------------------------------------------------------------------------------------------------------------------------------------------------------------------------------------------------------------------------------------------------------------------------------------------------------------------------------------------------------------------------------------------------------------------------|
| GO:0016491 | oxidoreductase activity | 1,63E-26     | TcCLB.506357.50, TcCLB.511277.60,<br>TcCLB.507047.150,<br>TcCLB.504425.60,<br>TcCLB.509179.100,<br>TcCLB.506213.50, TcCLB.508805.80,<br>TcCLB.511817.40, TcCLB.511287.49,<br>TcCLB.506937.10, TcCLB.511691.39,<br>TcCLB.508535.10, TcCLB.506147.9,<br>TcCLB.506779.200,<br>TcCLB.509207.90, TcCLB.508461.80,<br>TcCLB.510213.110,<br>TcCLB.507019.20, TcCLB.507617.9,<br>TcCLB.508821.40, TcCLB.510943.50,<br>TcCLB.510437.40, TcCLB.503577.9,<br>TcCLB.509351.10,<br>TcCLB.505807.180,<br>TcCLB.511037.20, TcCLB.511151.90,<br>TcCLB.508177.90, TcCLB.510265.10,<br>TcCLB.508297.50, TcCLB.507049.60,<br>TcCLB.510311.90,<br>TcCLB.509331.210,<br>TcCLB.506219.40,<br>TcCLB.506821.210,<br>TcCLB.510521.10, TcCLB.506857.20,<br>TcCLB.508677.80, TcCLB.511461.60,<br>TcCLB.509459.79, TcCLB.504339.19. |



|            |                             |          |                                                                                                                                                                                                                                                                                                                                                                                                                                                                                                                                       |
|------------|-----------------------------|----------|---------------------------------------------------------------------------------------------------------------------------------------------------------------------------------------------------------------------------------------------------------------------------------------------------------------------------------------------------------------------------------------------------------------------------------------------------------------------------------------------------------------------------------------|
| GO:0030170 | pyridoxal phosphate binding | 5,69E-18 | TcCLB.510795.10, TcCLB.510187.40,<br>TcCLB.503747.10, TcCLB.508535.50,<br>TcCLB.510565.11, TcCLB.509041.10,<br>TcCLB.509043.10, TcCLB.510187.70,<br>TcCLB.510187.20, TcCLB.511691.10,<br>TcCLB.506905.50, TcCLB.510381.10,<br>TcCLB.508241.140,<br>TcCLB.508177.110,<br>TcCLB.508177.120,<br>TcCLB.508177.129,<br>TcCLB.510741.10, TcCLB.510739.19,<br>TcCLB.510661.250,<br>TcCLB.508175.360,<br>TcCLB.510945.70, TcCLB.508257.10,<br>TcCLB.506529.430,<br>TcCLB.506529.420,<br>TcCLB.506959.70, TcCLB.506405.50,<br>TcCLB.503453.100 |
|------------|-----------------------------|----------|---------------------------------------------------------------------------------------------------------------------------------------------------------------------------------------------------------------------------------------------------------------------------------------------------------------------------------------------------------------------------------------------------------------------------------------------------------------------------------------------------------------------------------------|

|            |                                  |          |                                                                                                                                                                                                                                                                                                                                                                                                                                                                                                                                                                                                                                                           |
|------------|----------------------------------|----------|-----------------------------------------------------------------------------------------------------------------------------------------------------------------------------------------------------------------------------------------------------------------------------------------------------------------------------------------------------------------------------------------------------------------------------------------------------------------------------------------------------------------------------------------------------------------------------------------------------------------------------------------------------------|
| GO:0003824 | catalytic activity               | 6,26E-16 | TcCLB.507047.150,<br>TcCLB.506559.410,<br>TcCLB.506247.220,<br>TcCLB.509179.100,<br>TcCLB.509569.100,<br>TcCLB.506937.10, TcCLB.506593.60,<br>TcCLB.511691.10, TcCLB.508303.10,<br>TcCLB.506789.280,<br>TcCLB.506905.50, TcCLB.505945.20,<br>TcCLB.510381.10,<br>TcCLB.508241.140,<br>TcCLB.508177.110,<br>TcCLB.506931.10, TcCLB.507923.10,<br>TcCLB.508177.120,<br>TcCLB.511753.120,<br>TcCLB.510667.140,<br>TcCLB.508387.20,<br>TcCLB.508177.129,<br>TcCLB.506195.120,<br>TcCLB.510437.40,<br>TcCLB.508175.360,<br>TcCLB.506779.80,<br>TcCLB.510101.140,<br>TcCLB.503991.39, TcCLB.506865.2,<br>TcCLB.511179.150,<br>TcCLB.508119.120, TcCLB.508989.9. |
| GO:0008234 | cysteine-type peptidase activity | 2,88E-10 | TcCLB.510535.100,<br>TcCLB.511827.100,<br>TcCLB.506529.550,<br>TcCLB.507537.10,<br>TcCLB.507603.270,<br>TcCLB.507603.260,<br>TcCLB.507537.20,<br>TcCLB.509429.329,<br>TcCLB.510073.17,<br>TcCLB.509429.320,<br>TcCLB.507297.10, TcCLB.509401.20,<br>TcCLB.508595.50                                                                                                                                                                                                                                                                                                                                                                                       |

|            |                                    |          |                                                                                                                                                                                                                                                                                                                                      |
|------------|------------------------------------|----------|--------------------------------------------------------------------------------------------------------------------------------------------------------------------------------------------------------------------------------------------------------------------------------------------------------------------------------------|
| GO:0016740 | transferase activity               | 1,13E-09 | TcCLB.510795.10, TcCLB.510187.40, TcCLB.503747.10, TcCLB.508535.50, TcCLB.510565.11, TcCLB.509041.10, TcCLB.509043.10, TcCLB.510187.70, TcCLB.510187.20, TcCLB.510945.70, TcCLB.508257.10, TcCLB.506529.430, TcCLB.506529.420, TcCLB.510381.30, TcCLB.506959.70, TcCLB.506405.50, TcCLB.509825.40, TcCLB.503453.100, TcCLB.511655.40 |
| GO:0022857 | transmembrane transporter activity | 6,44E-09 | TcCLB.511041.40, TcCLB.508231.9, TcCLB.508551.39, TcCLB.506355.100, TcCLB.508551.30, TcCLB.506355.10, TcCLB.424937.10, TcCLB.504125.100                                                                                                                                                                                              |
| GO:0020037 | heme binding                       | 8,2E-09  | TcCLB.511073.10, TcCLB.509239.10, TcCLB.507019.20, TcCLB.426435.9, TcCLB.506773.44, TcCLB.503653.60, TcCLB.509719.40, TcCLB.510101.50, TcCLB.506945.190, TcCLB.508799.160, TcCLB.507609.40, TcCLB.510181.20, TcCLB.509395.100, TcCLB.511391.160, TcCLB.410049.20, TcCLB.509231.10                                                    |

|            |                                          |          |                                                                                                                                                |
|------------|------------------------------------------|----------|------------------------------------------------------------------------------------------------------------------------------------------------|
| GO:0008777 | acetylornithine deacetylase activity     | 1,26E-08 | TcCLB.511391.120,<br>TcCLB.507689.40, TcCLB.507689.30,<br>TcCLB.507657.20, TcCLB.507657.10,<br>TcCLB.510837.20, TcCLB.508971.40                |
| GO:0008137 | NADH dehydrogenase (ubiquinone) activity | 3,66E-08 | TcCLB.503893.80, TcCLB.508507.59,<br>TcCLB.506337.160,<br>TcCLB.508601.50,<br>TcCLB.510659.270,<br>TcCLB.507009.50, TcCLB.510743.30            |
| GO:0050897 | cobalt ion binding                       | 3,79E-07 | TcCLB.511391.120,<br>TcCLB.507689.40, TcCLB.507689.30,<br>TcCLB.507657.20, TcCLB.507657.10,<br>TcCLB.510837.20, TcCLB.508971.40                |
| GO:0008308 | voltage-gated anion channel activity     | 6,29E-07 | TcCLB.511687.19,<br>TcCLB.508741.229,<br>TcCLB.508737.210,<br>TcCLB.509141.40, TcCLB.511687.10,<br>TcCLB.509129.10                             |
| GO:0015288 | porin activity                           | 6,29E-07 | TcCLB.511687.19,<br>TcCLB.508741.229,<br>TcCLB.508737.210,<br>TcCLB.509141.40, TcCLB.511687.10,<br>TcCLB.509129.10                             |
| GO:0010181 | FMN binding                              | 3,24E-06 | TcCLB.507047.150, TcCLB.506147.9,<br>TcCLB.508461.80, TcCLB.507617.9,<br>TcCLB.508399.10, TcCLB.507869.10,<br>TcCLB.503753.29, TcCLB.506585.70 |

|            |                                                  |          |                                                                                                                                                                                                               |
|------------|--------------------------------------------------|----------|---------------------------------------------------------------------------------------------------------------------------------------------------------------------------------------------------------------|
| GO:0009055 | electron transfer activity                       | 7,2E-06  | TcCLB.507889.20, TcCLB.509719.40, TcCLB.510101.50, TcCLB.509177.50, TcCLB.506945.190, TcCLB.503477.10, TcCLB.511303.70, TcCLB.511391.160, TcCLB.510659.270, TcCLB.509231.10, TcCLB.510743.30, TcCLB.508265.10 |
| GO:0008483 | transaminase activity                            | 1,21E-05 | TcCLB.510795.10, TcCLB.510187.40, TcCLB.510565.11, TcCLB.510187.70, TcCLB.510187.20                                                                                                                           |
| GO:0004197 | cysteine-type endopeptidase activity             | 1,56E-05 | TcCLB.510535.100, TcCLB.511827.100, TcCLB.507603.270, TcCLB.507603.260, TcCLB.510073.17, TcCLB.509429.320, TcCLB.509401.20, TcCLB.508595.50                                                                   |
| GO:0008239 | dipeptidyl-peptidase activity                    | 3,03E-05 | TcCLB.509205.120, TcCLB.509197.50, TcCLB.508601.141, TcCLB.508699.120                                                                                                                                         |
| GO:0016705 | oxidoreductase activity, acting on paired donors | 5,3E-05  | TcCLB.509719.40, TcCLB.510101.50, TcCLB.506945.190, TcCLB.510795.30, TcCLB.510565.20, TcCLB.509231.10                                                                                                         |
| GO:0005507 | copper ion binding                               | 0,000125 | TcCLB.504867.70, TcCLB.510943.130, TcCLB.509463.20, TcCLB.510507.29, TcCLB.508995.60, TcCLB.506649.50                                                                                                         |

|            |                                                 |          |                                                                                                                                                                                                                                                                                                                                                                                                                                                                                                  |
|------------|-------------------------------------------------|----------|--------------------------------------------------------------------------------------------------------------------------------------------------------------------------------------------------------------------------------------------------------------------------------------------------------------------------------------------------------------------------------------------------------------------------------------------------------------------------------------------------|
| GO:0004198 | calcium-dependent cysteine-type endopeptid      | 0,00014  | TcCLB.511329.10,<br>TcCLB.508999.200,<br>TcCLB.503855.40,<br>TcCLB.506563.210,<br>TcCLB.508555.50,<br>TcCLB.509237.120,<br>TcCLB.509013.10, TcCLB.511441.20,<br>TcCLB.510337.20, TcCLB.508999.190                                                                                                                                                                                                                                                                                                |
| GO:0016787 | hydrolase activity                              | 0,000217 | TcCLB.510257.80,<br>TcCLB.509213.120,<br>TcCLB.511391.120,<br>TcCLB.507689.40, TcCLB.510837.9,<br>TcCLB.509205.120,<br>TcCLB.507689.50, TcCLB.507689.30,<br>TcCLB.507657.20,<br>TcCLB.508601.141,<br>TcCLB.507657.10,<br>TcCLB.508699.120,<br>TcCLB.510837.20,<br>TcCLB.506513.110,<br>TcCLB.508919.10, TcCLB.506931.10,<br>TcCLB.508971.40, TcCLB.506975.40,<br>TcCLB.507081.110,<br>TcCLB.510131.40, TcCLB.503991.20,<br>TcCLB.508043.20, TcCLB.506363.70,<br>TcCLB.509633.60, TcCLB.509169.30 |
| GO:0016671 | oxidoreductase activity, acting on a sulfur gro | 0,000276 | TcCLB.510855.10,<br>TcCLB.509611.180,<br>TcCLB.508837.189                                                                                                                                                                                                                                                                                                                                                                                                                                        |
| GO:0008762 | UDP-N-acetylmuramate dehydrogenase activ        | 0,000398 | TcCLB.507047.150,<br>TcCLB.509179.100,<br>TcCLB.509459.79, TcCLB.504151.60                                                                                                                                                                                                                                                                                                                                                                                                                       |
| GO:0004553 | hydrolase activity, hydrolyzing O-glycosyl com  | 0,000436 | TcCLB.506195.120,<br>TcCLB.510283.70, TcCLB.503823.40,<br>TcCLB.506407.10                                                                                                                                                                                                                                                                                                                                                                                                                        |

|            |                                                |          |                                                                                                                                                      |
|------------|------------------------------------------------|----------|------------------------------------------------------------------------------------------------------------------------------------------------------|
| GO:0004611 | phosphoenolpyruvate carboxykinase activity     | 0,000435 | TcCLB.506775.180,<br>TcCLB.508441.20, TcCLB.507547.90                                                                                                |
| GO:0017076 | purine nucleotide binding                      | 0,000435 | TcCLB.506775.180,<br>TcCLB.508441.20, TcCLB.507547.90                                                                                                |
| GO:0004177 | aminopeptidase activity                        | 0,000471 | TcCLB.509205.120,<br>TcCLB.508601.141,<br>TcCLB.508699.120,<br>TcCLB.510655.120, TcCLB.510751.4,<br>TcCLB.508799.240                                 |
| GO:0005506 | iron ion binding                               | 0,000493 | TcCLB.509719.40, TcCLB.510101.50,<br>TcCLB.506945.190,<br>TcCLB.507609.40, TcCLB.510181.20,<br>TcCLB.511391.160,<br>TcCLB.473111.10, TcCLB.509231.10 |
| GO:0016747 | transferase activity, transferring acyl groups | 0,000893 | TcCLB.504425.60, TcCLB.510265.10,<br>TcCLB.510311.90,<br>TcCLB.509331.210,<br>TcCLB.508677.80, TcCLB.509463.30,<br>TcCLB.504339.19, TcCLB.510507.20  |
| GO:0016810 | hydrolase activity, acting on carbon-nitrogen  | 0,001454 | TcCLB.510039.40,<br>TcCLB.508741.140,<br>TcCLB.509979.150,<br>TcCLB.509137.30, TcCLB.441401.10                                                       |
| GO:0004335 | galactokinase activity                         | 0,001625 | TcCLB.510667.120,<br>TcCLB.507009.40, TcCLB.507001.110                                                                                               |
| GO:0048037 | cofactor binding                               | 0,002978 | TcCLB.506263.10,<br>TcCLB.510099.120, TcCLB.506263.20                                                                                                |
| GO:0004462 | lactoylglutathione lyase activity              | 0,003105 | TcCLB.510659.240, TcCLB.510743.70                                                                                                                    |
| GO:0003858 | 3-hydroxybutyrate dehydrogenase activity       | 0,004675 | TcCLB.507049.60, TcCLB.506567.70                                                                                                                     |
| GO:0003885 | D-arabinono-1,4-lactone oxidase activity       | 0,005738 | TcCLB.507047.150,<br>TcCLB.509179.100                                                                                                                |
| GO:0003987 | acetate-CoA ligase activity                    | 0,005747 | TcCLB.509331.30, TcCLB.504427.110                                                                                                                    |
| GO:0004413 | homoserine kinase activity                     | 0,005254 | TcCLB.503597.10, TcCLB.509167.150                                                                                                                    |

|            |                                                 |          |                                                                                                                                     |
|------------|-------------------------------------------------|----------|-------------------------------------------------------------------------------------------------------------------------------------|
| GO:0004421 | hydroxymethylglutaryl-CoA synthase activity     | 0,005735 | TcCLB.511071.50, TcCLB.511903.40                                                                                                    |
| GO:0004559 | alpha-mannosidase activity                      | 0,005747 | TcCLB.506195.120, TcCLB.506407.10                                                                                                   |
| GO:0004612 | phosphoenolpyruvate carboxykinase (ATP) ac      | 0,005744 | TcCLB.508441.20, TcCLB.507547.90                                                                                                    |
| GO:0004657 | proline dehydrogenase activity                  | 0,005747 | TcCLB.511237.30, TcCLB.506411.30                                                                                                    |
| GO:0004735 | pyrroline-5-carboxylate reductase activity      | 0,004706 | TcCLB.509207.90, TcCLB.506857.20                                                                                                    |
| GO:0004751 | ribose-5-phosphate isomerase activity           | 0,003351 | TcCLB.509199.24, TcCLB.508601.119                                                                                                   |
| GO:0004788 | thiamine diphosphokinase activity               | 0,005693 | TcCLB.511051.59, TcCLB.509683.124                                                                                                   |
| GO:0008478 | pyridoxal kinase activity                       | 0,004991 | TcCLB.509059.50, TcCLB.507925.40                                                                                                    |
| GO:0008495 | protoheme IX farnesyltransferase activity       | 0,005518 | TcCLB.509601.59, TcCLB.509767.59                                                                                                    |
| GO:0008887 | glycerate kinase activity                       | 0,005744 | TcCLB.508741.170, TcCLB.509139.10                                                                                                   |
| GO:0008936 | nicotinamidase activity                         | 0,004189 | TcCLB.506593.60, TcCLB.506829.80                                                                                                    |
| GO:0009678 | hydrogen-translocating pyrophosphatase acti     | 0,005747 | TcCLB.511385.30, TcCLB.510773.20                                                                                                    |
| GO:0015923 | mannosidase activity                            | 0,005747 | TcCLB.506195.120, TcCLB.506407.10                                                                                                   |
| GO:0016208 | AMP binding                                     | 0,005747 | TcCLB.509331.30, TcCLB.504427.110                                                                                                   |
| GO:0016614 | oxidoreductase activity, acting on CH-OH grou   | 0,004529 | TcCLB.507047.150,<br>TcCLB.509179.100,<br>TcCLB.509459.79, TcCLB.504151.60                                                          |
| GO:0016615 | malate dehydrogenase activity                   | 0,005228 | TcCLB.506937.10, TcCLB.510437.40                                                                                                    |
| GO:0016616 | oxidoreductase activity, acting on the CH-OH    | 0,003374 | TcCLB.506937.10, TcCLB.506263.10,<br>TcCLB.510437.40,<br>TcCLB.510099.120,<br>TcCLB.506263.20,<br>TcCLB.507993.270, TcCLB.508893.10 |
| GO:0016639 | oxidoreductase activity, acting on the CH-NH2   | 0,00561  | TcCLB.508111.30, TcCLB.507875.20                                                                                                    |
| GO:0016651 | oxidoreductase activity, acting on NAD(P)H      | 0,005725 | TcCLB.508399.10, TcCLB.507869.10                                                                                                    |
| GO:0016717 | oxidoreductase activity, acting on paired don   | 0,005631 | TcCLB.507609.40, TcCLB.510181.20                                                                                                    |
| GO:0016763 | transferase activity, transferring pentosyl gro | 0,005048 | TcCLB.506789.280, TcCLB.508387.20                                                                                                   |
| GO:0016812 | hydrolase activity, acting on carbon-nitrogen   | 0,005645 | TcCLB.508741.140, TcCLB.509137.30                                                                                                   |
| GO:0016899 | oxidoreductase activity, acting on the CH-OH    | 0,005738 | TcCLB.507047.150,<br>TcCLB.509179.100                                                                                               |
| GO:0016920 | pyroglutamyl-peptidase activity                 | 0,004285 | TcCLB.506635.60, TcCLB.508027.110                                                                                                   |



|            |                                              |          |                                                                                                                                                           |
|------------|----------------------------------------------|----------|-----------------------------------------------------------------------------------------------------------------------------------------------------------|
| GO:0045290 | D-arabinose 1-dehydrogenase [NAD(P)+] acti   | 0,004837 | TcCLB.506213.50, TcCLB.511287.49                                                                                                                          |
| GO:0050024 | L-galactonolactone oxidase activity          | 0,005738 | TcCLB.507047.150,<br>TcCLB.509179.100                                                                                                                     |
| GO:0050242 | pyruvate, phosphate dikinase activity        | 0,005747 | TcCLB.510101.140,<br>TcCLB.506297.190                                                                                                                     |
| GO:0004602 | glutathione peroxidase activity              | 0,006033 | TcCLB.507515.4, TcCLB.503899.119,<br>TcCLB.507515.10                                                                                                      |
| GO:0008138 | protein tyrosine/serine/threonine phosphatas | 0,006255 | TcCLB.503471.10,<br>TcCLB.509109.130,<br>TcCLB.510603.60, TcCLB.503657.70,<br>TcCLB.509109.120,<br>TcCLB.506779.110,<br>TcCLB.506743.110, TcCLB.510603.80 |
| GO:0050662 | coenzyme binding                             | 0,006701 | TcCLB.507923.10,<br>TcCLB.511753.120,<br>TcCLB.508119.120,<br>TcCLB.510349.10, TcCLB.511019.84,<br>TcCLB.503925.40                                        |

|            |                                  |          |                                                                                                                                                                                                                                                                                                                                                                                                                                                                                                                                                                                                                                                                                                 |
|------------|----------------------------------|----------|-------------------------------------------------------------------------------------------------------------------------------------------------------------------------------------------------------------------------------------------------------------------------------------------------------------------------------------------------------------------------------------------------------------------------------------------------------------------------------------------------------------------------------------------------------------------------------------------------------------------------------------------------------------------------------------------------|
| GO:0004672 | protein kinase activity          | 0,007172 | TcCLB.508405.70, TcCLB.507837.20, TcCLB.508831.110, TcCLB.508621.10, TcCLB.511671.80, TcCLB.510345.9, TcCLB.511301.90, TcCLB.510861.140, TcCLB.510155.160, TcCLB.503943.10, TcCLB.511837.90, TcCLB.510609.70, TcCLB.507211.20, TcCLB.503617.10, TcCLB.506835.159, TcCLB.506401.110, TcCLB.505193.110, TcCLB.508153.740, TcCLB.506999.180, TcCLB.511351.30, TcCLB.506469.80, TcCLB.511573.40, TcCLB.510759.40, TcCLB.476421.9, TcCLB.506633.10, TcCLB.511277.140, TcCLB.506327.99, TcCLB.504269.10, TcCLB.510941.3, TcCLB.464807.10, TcCLB.509207.80, TcCLB.506469.30, TcCLB.511821.40, TcCLB.506327.90, TcCLB.506775.190, TcCLB.506945.110, TcCLB.509599.130, TcCLB.511817.80, TcCLB.507683.40. |
| GO:0051539 | 4 iron, 4 sulfur cluster binding | 0,008307 | TcCLB.508399.10, TcCLB.507869.10, TcCLB.503893.80, TcCLB.508507.59                                                                                                                                                                                                                                                                                                                                                                                                                                                                                                                                                                                                                              |
| GO:0016791 | phosphatase activity             | 0,010746 | TcCLB.503471.10, TcCLB.509109.130, TcCLB.510603.60, TcCLB.503657.70, TcCLB.509109.120, TcCLB.506779.110, TcCLB.506743.110, TcCLB.510603.80, TcCLB.506825.210                                                                                                                                                                                                                                                                                                                                                                                                                                                                                                                                    |
| GO:0003954 | NADH dehydrogenase activity      | 0,011469 | TcCLB.508601.50, TcCLB.507009.50                                                                                                                                                                                                                                                                                                                                                                                                                                                                                                                                                                                                                                                                |

|            |                                                |          |                                                                                                                                                                                                                                                                                                                                                                                                                                                                                                                                                                                                                                                                                                                   |
|------------|------------------------------------------------|----------|-------------------------------------------------------------------------------------------------------------------------------------------------------------------------------------------------------------------------------------------------------------------------------------------------------------------------------------------------------------------------------------------------------------------------------------------------------------------------------------------------------------------------------------------------------------------------------------------------------------------------------------------------------------------------------------------------------------------|
| GO:0016772 | transferase activity, transferring phosphorus- | 0,011482 | TcCLB.508405.70, TcCLB.507837.20, TcCLB.508831.110, TcCLB.508621.10, TcCLB.511671.80, TcCLB.510345.9, TcCLB.510101.140, TcCLB.511301.90, TcCLB.510445.10, TcCLB.510861.140, TcCLB.510155.160, TcCLB.503943.10, TcCLB.511837.90, TcCLB.510609.70, TcCLB.507211.20, TcCLB.503617.10, TcCLB.463451.10, TcCLB.506835.159, TcCLB.506401.110, TcCLB.505193.110, TcCLB.508153.740, TcCLB.506999.180, TcCLB.511351.30, TcCLB.506469.80, TcCLB.511573.40, TcCLB.510759.40, TcCLB.476421.9, TcCLB.506633.10, TcCLB.511277.140, TcCLB.506327.99, TcCLB.504269.10, TcCLB.510941.3, TcCLB.464807.10, TcCLB.509207.80, TcCLB.506469.30, TcCLB.511821.40, TcCLB.506327.90, TcCLB.506775.190, TcCLB.506297.190, TcCLB.506945.110. |
| GO:0004129 | cytochrome-c oxidase activity                  | 0,011672 | TcCLB.504069.20, TcCLB.511145.10                                                                                                                                                                                                                                                                                                                                                                                                                                                                                                                                                                                                                                                                                  |
| GO:0046873 | metal ion transmembrane transporter activit    | 0,012073 | TcCLB.507527.50, TcCLB.509197.20, TcCLB.509197.10, TcCLB.508701.20, TcCLB.509437.60, TcCLB.509437.70                                                                                                                                                                                                                                                                                                                                                                                                                                                                                                                                                                                                              |
| GO:0016830 | carbon-carbon lyase activity                   | 0,013473 | TcCLB.503991.39, TcCLB.507081.130                                                                                                                                                                                                                                                                                                                                                                                                                                                                                                                                                                                                                                                                                 |
| GO:0016531 | copper chaperone activity                      | 0,013818 | TcCLB.509463.20, TcCLB.510507.29                                                                                                                                                                                                                                                                                                                                                                                                                                                                                                                                                                                                                                                                                  |
| GO:0004806 | triglyceride lipase activity                   | 0,015543 | TcCLB.510679.100, TcCLB.511437.30, TcCLB.505615.20, TcCLB.511439.30, TcCLB.507089.210                                                                                                                                                                                                                                                                                                                                                                                                                                                                                                                                                                                                                             |
| GO:0003988 | acetyl-CoA C-acyltransferase activity          | 0,016024 | TcCLB.509463.30, TcCLB.510507.20                                                                                                                                                                                                                                                                                                                                                                                                                                                                                                                                                                                                                                                                                  |
| GO:0004838 | L-tyrosine:2-oxoglutarate aminotransferase a   | 0,01599  | TcCLB.510795.10, TcCLB.510187.40                                                                                                                                                                                                                                                                                                                                                                                                                                                                                                                                                                                                                                                                                  |
| GO:0000104 | succinate dehydrogenase activity               | 0,016369 | TcCLB.508535.10, TcCLB.503849.60                                                                                                                                                                                                                                                                                                                                                                                                                                                                                                                                                                                                                                                                                  |

|            |                                                |          |                                                                                                                                      |
|------------|------------------------------------------------|----------|--------------------------------------------------------------------------------------------------------------------------------------|
| GO:0004725 | protein tyrosine phosphatase activity          | 0,017904 | TcCLB.509205.120,<br>TcCLB.508601.141,<br>TcCLB.508699.120                                                                           |
| GO:0048038 | quinone binding                                | 0,018438 | TcCLB.503893.80, TcCLB.508507.59                                                                                                     |
| GO:0008124 | 4-alpha-hydroxytetrahydrobiopterin dehydrat    | 0,021156 | TcCLB.511575.10, TcCLB.503613.40                                                                                                     |
| GO:0016857 | racemase and epimerase activity, acting on d   | 0,022608 | TcCLB.510667.140, TcCLB.507009.30                                                                                                    |
| GO:0030983 | mismatched DNA binding                         | 0,022609 | TcCLB.507233.110,<br>TcCLB.509693.209,<br>TcCLB.509967.20, TcCLB.511911.30                                                           |
| GO:0015078 | proton transmembrane transporter activity      | 0,022839 | TcCLB.507517.60, TcCLB.503579.70,<br>TcCLB.504131.180, TcCLB.504125.40                                                               |
| GO:0016627 | oxidoreductase activity, acting on the CH-CH g | 0,026606 | TcCLB.511211.70, TcCLB.508975.10,<br>TcCLB.509331.70, TcCLB.504427.70,<br>TcCLB.509153.120                                           |
| GO:0009922 | fatty acid elongase activity                   | 0,02728  | TcCLB.511245.130, TcCLB.506661.30                                                                                                    |
| GO:0010309 | acireductone dioxygenase [iron(II)-requiring]  | 0,02738  | TcCLB.506629.200, TcCLB.506367.30                                                                                                    |
| GO:0004070 | aspartate carbamoyltransferase activity        | 0,028249 | TcCLB.507091.50, TcCLB.511643.30                                                                                                     |
| GO:0016597 | amino acid binding                             | 0,028249 | TcCLB.507091.50, TcCLB.511643.30                                                                                                     |
| GO:0016743 | carboxyl- or carbamoyltransferase activity     | 0,028249 | TcCLB.507091.50, TcCLB.511643.30                                                                                                     |
| GO:0003950 | NAD+ ADP-ribosyltransferase activity           | 0,030152 | TcCLB.509721.60, TcCLB.510173.90                                                                                                     |
| GO:0004659 | prenyltransferase activity                     | 0,030462 | TcCLB.509601.59, TcCLB.509767.59                                                                                                     |
| GO:0008080 | N-acetyltransferase activity                   | 0,034181 | TcCLB.506177.100,<br>TcCLB.506181.104,<br>TcCLB.511809.120, TcCLB.511811.30                                                          |
| GO:0050660 | flavin adenine dinucleotide binding            | 0,043244 | TcCLB.507047.150,<br>TcCLB.509179.100,<br>TcCLB.508837.189,<br>TcCLB.509459.79, TcCLB.509461.10,<br>TcCLB.509589.20, TcCLB.504151.60 |
| GO:0003854 | 3-beta-hydroxy-delta5-steroid dehydrogenase    | 0,046043 | TcCLB.507993.270, TcCLB.508893.10                                                                                                    |

|            |                                                |          |                                                                     |
|------------|------------------------------------------------|----------|---------------------------------------------------------------------|
| GO:0051287 | NAD binding                                    | 0,061652 | TcCLB.508399.10, TcCLB.507869.10, TcCLB.511323.50, TcCLB.506513.190 |
| GO:0016813 | hydrolase activity, acting on carbon-nitrogen  | 0,062881 | TcCLB.507031.90, TcCLB.507963.20                                    |
| GO:0030060 | L-malate dehydrogenase activity                | 0,063652 | TcCLB.506937.10, TcCLB.510437.40                                    |
| GO:0047801 | L-cysteine:2-oxoglutarate aminotransferase a   | 0,063967 | TcCLB.503747.10                                                     |
| GO:0052654 | L-leucine transaminase activity                | 0,063967 | TcCLB.503747.10                                                     |
| GO:0070548 | L-glutamine aminotransferase activity          | 0,063967 | TcCLB.503747.10                                                     |
| GO:0015035 | protein disulfide oxidoreductase activity      | 0,064453 | TcCLB.507889.20, TcCLB.503477.10, TcCLB.508265.10                   |
| GO:0004427 | inorganic diphosphatase activity               | 0,065941 | TcCLB.511385.30, TcCLB.510773.20                                    |
| GO:0016829 | lyase activity                                 | 0,066473 | TcCLB.507559.80, TcCLB.507669.10                                    |
| GO:0015238 | drug transmembrane transporter activity        | 0,067571 | TcCLB.504069.120, TcCLB.507625.140, TcCLB.507787.50                 |
| GO:0003842 | 1-pyrroline-5-carboxylate dehydrogenase acti   | 0,075827 | TcCLB.510943.50                                                     |
| GO:0003960 | NADPH:quinone reductase activity               | 0,069533 | TcCLB.511287.49                                                     |
| GO:0004033 | aldo-keto reductase (NADP) activity            | 0,069533 | TcCLB.511287.49                                                     |
| GO:0004340 | glucokinase activity                           | 0,073966 | TcCLB.510187.100                                                    |
| GO:0004397 | histidine ammonia-lyase activity               | 0,075819 | TcCLB.506247.220                                                    |
| GO:0004768 | stearoyl-CoA 9-desaturase activity             | 0,075198 | TcCLB.509239.10                                                     |
| GO:0004802 | transketolase activity                         | 0,075827 | TcCLB.511903.120                                                    |
| GO:0005355 | glucose transmembrane transporter activity     | 0,075824 | TcCLB.506355.10                                                     |
| GO:0008289 | lipid binding                                  | 0,075683 | TcCLB.508257.220                                                    |
| GO:0008716 | D-alanine-D-alanine ligase activity            | 0,075789 | TcCLB.510347.20                                                     |
| GO:0015189 | L-lysine transmembrane transporter activity    | 0,075538 | TcCLB.511545.80                                                     |
| GO:0016153 | urocanate hydratase activity                   | 0,075827 | TcCLB.504045.110                                                    |
| GO:0016175 | superoxide-generating NADPH oxidase activit    | 0,069533 | TcCLB.511287.49                                                     |
| GO:0016841 | ammonia-lyase activity                         | 0,075819 | TcCLB.506247.220                                                    |
| GO:0016868 | intramolecular transferase activity, phosphot  | 0,070212 | TcCLB.508257.70, TcCLB.508569.80                                    |
| GO:0045148 | tripeptide aminopeptidase activity             | 0,074973 | TcCLB.506513.110                                                    |
| GO:0050105 | L-gulonolactone oxidase activity               | 0,075769 | TcCLB.509179.100                                                    |
| GO:0070402 | NADPH binding                                  | 0,069533 | TcCLB.511287.49                                                     |
| GO:0004616 | phosphogluconate dehydrogenase (decarboxy      | 0,081394 | TcCLB.505807.180, TcCLB.507017.40                                   |
| GO:0016624 | oxidoreductase activity, acting on the aldehyd | 0,088165 | TcCLB.506853.50, TcCLB.508781.110                                   |
| GO:0030145 | manganese ion binding                          | 0,092028 | TcCLB.510655.120, TcCLB.510751.4                                    |
| GO:0042626 | ATPase activity, coupled to transmembrane r    | 0,096821 | TcCLB.508965.14, TcCLB.506417.10, TcCLB.506925.530                  |

# CC Results from goseq.

| row.names  | term                | over.p.value | de.genes.in.cat                                                                                                                                                                                                                                                                                                                                                                                                                                                                                                                                                                                                                                                                                                          |
|------------|---------------------|--------------|--------------------------------------------------------------------------------------------------------------------------------------------------------------------------------------------------------------------------------------------------------------------------------------------------------------------------------------------------------------------------------------------------------------------------------------------------------------------------------------------------------------------------------------------------------------------------------------------------------------------------------------------------------------------------------------------------------------------------|
| GO:0000331 | contractile vacuole | 1,201E-20    | TcCLB.506551.10,<br>TcCLB.508999.260,<br>TcCLB.509965.394, TcCLB.503413.4,<br>TcCLB.509051.20, TcCLB.506563.79,<br>TcCLB.510855.10,<br>TcCLB.503975.100,<br>TcCLB.506247.220,<br>TcCLB.506563.170,<br>TcCLB.507689.30, TcCLB.510679.40,<br>TcCLB.510837.20, TcCLB.507187.9,<br>TcCLB.508999.250,<br>TcCLB.508503.20, TcCLB.503837.10,<br>TcCLB.508535.10,<br>TcCLB.511575.130,<br>TcCLB.506893.100,<br>TcCLB.505945.20, TcCLB.511385.30,<br>TcCLB.510773.20, TcCLB.510943.50,<br>TcCLB.507711.200,<br>TcCLB.509351.10,<br>TcCLB.510101.140,<br>TcCLB.407477.50,<br>TcCLB.508209.100,<br>TcCLB.511151.90, TcCLB.509683.10,<br>TcCLB.506355.10, TcCLB.503887.40,<br>TcCLB.508231.40, TcCLB.506219.40,<br>TcCLB.503899.119. |

|            |                                |           |                                                                                                                                                                                                                                                                                                                                                                                                                                                                                                                                                                                                                                                                                                                                                                           |
|------------|--------------------------------|-----------|---------------------------------------------------------------------------------------------------------------------------------------------------------------------------------------------------------------------------------------------------------------------------------------------------------------------------------------------------------------------------------------------------------------------------------------------------------------------------------------------------------------------------------------------------------------------------------------------------------------------------------------------------------------------------------------------------------------------------------------------------------------------------|
| GO:0016021 | integral component of membrane | 3,944E-13 | TcCLB.510103.24, TcCLB.509713.30,<br>TcCLB.506551.10, TcCLB.506773.50,<br>TcCLB.510811.20,<br>TcCLB.508799.270,<br>TcCLB.509707.10, TcCLB.508065.70,<br>TcCLB.508799.290, TcCLB.509107.9,<br>TcCLB.510605.10, TcCLB.506947.10,<br>TcCLB.508647.180,<br>TcCLB.504137.100,<br>TcCLB.511639.20, TcCLB.511041.40,<br>TcCLB.510069.20,<br>TcCLB.509937.200,<br>TcCLB.510407.30,<br>TcCLB.510877.170,<br>TcCLB.508465.40, TcCLB.509601.59,<br>TcCLB.508689.40, TcCLB.508231.9,<br>TcCLB.508799.150,<br>TcCLB.509799.50,<br>TcCLB.504069.120,<br>TcCLB.508551.39, TcCLB.509767.59,<br>TcCLB.506355.100,<br>TcCLB.508551.30, TcCLB.506355.10,<br>TcCLB.511245.130,<br>TcCLB.424937.10, TcCLB.508965.14,<br>TcCLB.506661.30, TcCLB.506417.10,<br>TcCLB.510659.20, TcCLB.510309.20. |
|------------|--------------------------------|-----------|---------------------------------------------------------------------------------------------------------------------------------------------------------------------------------------------------------------------------------------------------------------------------------------------------------------------------------------------------------------------------------------------------------------------------------------------------------------------------------------------------------------------------------------------------------------------------------------------------------------------------------------------------------------------------------------------------------------------------------------------------------------------------|

|            |                                                    |           |                                                                                                                                                                                                                                                                                                                                                                                             |
|------------|----------------------------------------------------|-----------|---------------------------------------------------------------------------------------------------------------------------------------------------------------------------------------------------------------------------------------------------------------------------------------------------------------------------------------------------------------------------------------------|
| GO:0005741 | mitochondrial outer membrane                       | 1,385E-07 | TcCLB.503413.4, TcCLB.503975.100, TcCLB.506399.80, TcCLB.511687.19, TcCLB.508741.229, TcCLB.508737.210, TcCLB.505193.100, TcCLB.509141.40, TcCLB.511687.10, TcCLB.509129.10, TcCLB.511909.50, TcCLB.506467.29, TcCLB.506399.70, TcCLB.508873.420, TcCLB.506791.50, TcCLB.508319.20, TcCLB.511909.60, TcCLB.506941.220, TcCLB.507615.100, TcCLB.508647.110, TcCLB.508461.10, TcCLB.505843.49 |
| GO:0046930 | pore complex                                       | 6,289E-07 | TcCLB.511687.19, TcCLB.508741.229, TcCLB.508737.210, TcCLB.509141.40, TcCLB.511687.10, TcCLB.509129.10                                                                                                                                                                                                                                                                                      |
| GO:0005779 | integral component of peroxisomal membrane         | 2,064E-06 | TcCLB.510669.49, TcCLB.510669.20, TcCLB.508461.570, TcCLB.509203.40, TcCLB.507009.10, TcCLB.511017.50                                                                                                                                                                                                                                                                                       |
| GO:0031307 | integral component of mitochondrial outer membrane | 7,423E-06 | TcCLB.511687.19, TcCLB.508741.229, TcCLB.508737.210, TcCLB.509141.40, TcCLB.511687.10, TcCLB.509129.10                                                                                                                                                                                                                                                                                      |
| GO:0070069 | cytochrome complex                                 | 8,953E-05 | TcCLB.508823.70, TcCLB.509721.40, TcCLB.510173.70, TcCLB.506041.50                                                                                                                                                                                                                                                                                                                          |



|            |                                                 |           |                                                                                                                                                                                                                                                                                                                                                                                                             |
|------------|-------------------------------------------------|-----------|-------------------------------------------------------------------------------------------------------------------------------------------------------------------------------------------------------------------------------------------------------------------------------------------------------------------------------------------------------------------------------------------------------------|
| GO:0005739 | mitochondrion                                   | 0,0002451 | TcCLB.511385.30, TcCLB.504069.20, TcCLB.506989.140, TcCLB.503769.40, TcCLB.503991.39, TcCLB.503811.60, TcCLB.511145.10, TcCLB.507049.60, TcCLB.509233.150, TcCLB.511211.70, TcCLB.509463.30, TcCLB.506337.160, TcCLB.507081.130, TcCLB.508995.60, TcCLB.508029.10, TcCLB.506567.70, TcCLB.510507.20, TcCLB.507009.50, TcCLB.511395.20, TcCLB.506775.100, TcCLB.508027.129, TcCLB.511815.40, TcCLB.503677.20 |
| GO:0020022 | acidocalcisome                                  | 0,0004841 | TcCLB.511687.19, TcCLB.508741.229, TcCLB.508737.210, TcCLB.509141.40, TcCLB.511687.10, TcCLB.509129.10, TcCLB.511385.30, TcCLB.510773.20                                                                                                                                                                                                                                                                    |
| GO:0016281 | eukaryotic translation initiation factor 4F com | 0,0024117 | TcCLB.511687.19, TcCLB.508741.229, TcCLB.508737.210, TcCLB.509141.40, TcCLB.511687.10, TcCLB.509129.10, TcCLB.506773.120                                                                                                                                                                                                                                                                                    |
| GO:0005751 | mitochondrial respiratory chain complex IV      | 0,0052414 | TcCLB.506529.360, TcCLB.510889.50                                                                                                                                                                                                                                                                                                                                                                           |
| GO:0005758 | mitochondrial intermembrane space               | 0,0055483 | TcCLB.509463.20, TcCLB.510507.29, TcCLB.505843.49                                                                                                                                                                                                                                                                                                                                                           |
| GO:0012506 | vesicle membrane                                | 0,005744  | TcCLB.508441.20, TcCLB.507547.90                                                                                                                                                                                                                                                                                                                                                                            |

|            |                                              |           |                                                                                                                                                                                                                                                        |
|------------|----------------------------------------------|-----------|--------------------------------------------------------------------------------------------------------------------------------------------------------------------------------------------------------------------------------------------------------|
| GO:0016471 | vacuolar proton-transporting V-type ATPase c | 0,0095085 | TcCLB.510993.10, TcCLB.506375.110                                                                                                                                                                                                                      |
| GO:0005743 | mitochondrial inner membrane                 | 0,0134922 | TcCLB.508823.70, TcCLB.509721.40,<br>TcCLB.506649.50, TcCLB.510173.70                                                                                                                                                                                  |
| GO:0005829 | cytosol                                      | 0,0135831 | TcCLB.504045.60, TcCLB.503747.10,<br>TcCLB.506629.200,<br>TcCLB.506739.99, TcCLB.511287.49,<br>TcCLB.506593.60, TcCLB.506367.30,<br>TcCLB.509601.90,<br>TcCLB.510819.119,<br>TcCLB.508741.170,<br>TcCLB.506829.80, TcCLB.511823.70,<br>TcCLB.509139.10 |
| GO:0033177 | proton-transporting two-sector ATPase compl  | 0,0192668 | TcCLB.507517.60, TcCLB.503579.70,<br>TcCLB.504131.180, TcCLB.504125.40                                                                                                                                                                                 |
| GO:0031966 | mitochondrial membrane                       | 0,0203342 | TcCLB.509601.59, TcCLB.509767.59,<br>TcCLB.508601.50                                                                                                                                                                                                   |
| GO:0005747 | mitochondrial respiratory chain complex I    | 0,0344033 | TcCLB.506337.160,<br>TcCLB.506989.110,<br>TcCLB.510149.150                                                                                                                                                                                             |
| GO:0005783 | endoplasmic reticulum                        | 0,0447749 | TcCLB.509239.10, TcCLB.508257.10,<br>TcCLB.510349.50, TcCLB.503929.79,<br>TcCLB.506405.50, TcCLB.511823.70                                                                                                                                             |
| GO:0030964 | NADH dehydrogenase complex                   | 0,0595221 | TcCLB.508601.50                                                                                                                                                                                                                                        |
| GO:0005886 | plasma membrane                              | 0,0664821 | TcCLB.511545.80, TcCLB.511385.30,<br>TcCLB.504069.120, TcCLB.506179.5                                                                                                                                                                                  |
| GO:0020015 | glycosome                                    | 0,0669905 | TcCLB.507047.150,<br>TcCLB.509179.100,<br>TcCLB.510187.100,<br>TcCLB.511385.30, TcCLB.508441.20,<br>TcCLB.507547.90                                                                                                                                    |
| GO:0030176 | integral component of endoplasmic reticulum  | 0,0841113 | TcCLB.511245.130, TcCLB.506661.30                                                                                                                                                                                                                      |

**Supplementary Table 4. Annotated genes corresponding to RNA Binding Proteins identified in the CL Brener genome.**

| Gene ID          | TriTrypDB anotation                  | Domain |
|------------------|--------------------------------------|--------|
| TcCLB.507711.40  | RNA-binding protein                  | RRM    |
| TcCLB.424123.40  |                                      |        |
| TcCLB.469785.40  | RNA-binding protein                  | RRM    |
| TcCLB.507025.50  |                                      |        |
| TcCLB.507025.60  | RNA-binding protein                  | RRM    |
| TcCLB.503419.50  | MRB1-associated protein              | RRM    |
| TcCLB.509105.90  |                                      |        |
| TcCLB.503619.20  | Hypothetical protein                 | RRM    |
| TcCLB.511647.40  |                                      |        |
| TcCLB.503683.11  | Double RNA binding domain protein 6A | RRM    |
| TcCLB.509999.140 |                                      |        |
| TcCLB.503683.30  | RNA-binding protein                  | RRM    |
| TcCLB.509999.120 |                                      |        |
| TcCLB.509581.50  | Hypothetical protein                 | RRM    |
| TcCLB.503709.10  |                                      |        |
| TcCLB.508569.90  | Hypothetical protein                 | RRM    |
| TcCLB.503733.50  |                                      |        |
| TcCLB.503897.90  | Hypothetical protein                 | RRM    |
| TcCLB.509561.110 |                                      |        |
| TcCLB.507093.63  | RNA-binding protein                  | RRM    |
| TcCLB.503917.7   |                                      |        |
| TcCLB.507037.20  | RNA-binding protein                  | RRM    |
| TcCLB.508707.80  |                                      |        |
| TcCLB.508209.39  | Hypothetical protein                 | RRM    |
| TcCLB.503919.30  |                                      |        |
| TcCLB.509591.50  | RNA-binding protein 34               | RRM    |
| TcCLB.503999.90  |                                      |        |
| TcCLB.504005.6   | RNA-binding protein                  | RRM    |
| TcCLB.511481.55  |                                      |        |
| TcCLB.504071.80  | Nuclear cap binding protein          | RRM    |
| TcCLB.507089.70  | RNA-binding protein                  | RRM    |

\*Genes listed after last search for RBPs.

|                  |                                             |     |
|------------------|---------------------------------------------|-----|
| TcCLB.504085.30  | RNA-binding protein                         | RRM |
| TcCLB.511109.130 | Heterogeneous nuclear ribonucleoprotein H/F | RRM |
| TcCLB.504157.10  |                                             |     |
| TcCLB.504165.20  | Hypothetical protein                        | RRM |
| TcCLB.508981.20  |                                             |     |
| TcCLB.508145.30  | RNA-binding protein                         | RRM |
| TcCLB.504243.10  |                                             |     |
| TcCLB.504431.90  | U2 small nuclear ribonucleoprotein B        | RRM |
| TcCLB.507951.140 |                                             |     |
| TcCLB.505007.10  | RNA-binding protein                         | RRM |
| TcCLB.510007.30  |                                             |     |
| TcCLB.505165.10  | RNA-binding protein                         | RRM |
| TcCLB.506399.40  | Hypothetical protein                        | RRM |
| TcCLB.509243.20  |                                             |     |
| TcCLB.506425.60  | Hypothetical protein                        | RRM |
| TcCLB.506565.12  | RNA-binding protein                         | RRM |
| TcCLB.511837.129 |                                             |     |
| TcCLB.506565.4   | RNA-binding protein                         | RRM |
| TcCLB.506565.8   | RNA-binding protein                         | RRM |
| TcCLB.506625.70  | RNA-binding protein                         | RRM |
| TcCLB.506649.80  | Double RNA binding domain protein 3         | RRM |
| TcCLB.508349.39  |                                             |     |
| TcCLB.506825.10  | Double RNA binding domain protein 12        | RRM |
| TcCLB.506681.10  |                                             |     |
| TcCLB.506693.30  | RNA-binding protein 6                       | RRM |
| TcCLB.508153.680 |                                             |     |
| TcCLB.506795.10  | RNA-binding protein                         | RRM |
| TcCLB.509937.60  |                                             |     |
| TcCLB.506797.120 | Hypothetical protein                        | RRM |
| TcCLB.511907.100 |                                             |     |
| TcCLB.509167.30  | Hypothetical protein                        | RRM |
| TcCLB.506831.30  |                                             |     |

|                  |                                                      |     |
|------------------|------------------------------------------------------|-----|
| TcCLB.506925.400 | Hypothetical protein                                 | RRM |
| TcCLB.506989.100 | Triple RNA binding domain protein 3                  | RRM |
| TcCLB.510149.140 |                                                      |     |
| TcCLB.507093.220 | RNA-binding protein                                  | RRM |
| TcCLB.507093.229 | U-rich RNA-binding protein UBP-2                     | RRM |
| TcCLB.507093.250 | RNA-binding protein                                  | RRM |
| TcCLB.508213.40  | Hypothetical protein                                 | RRM |
| TcCLB.507515.40  |                                                      |     |
| TcCLB.508213.20  | Hypothetical protein                                 | RRM |
| TcCLB.507515.60  |                                                      |     |
| TcCLB.507611.300 | U1A small nuclear ribonucleoprotein                  | RRM |
| TcCLB.507723.120 |                                                      |     |
| TcCLB.507873.30  | Double RNA binding domain protein 7                  | RRM |
| TcCLB.510689.60  |                                                      |     |
| TcCLB.507885.10  | RNA-binding protein                                  | RRM |
| TcCLB.507993.140 | RNA-binding protein 29                               | RRM |
| TcCLB.511277.580 |                                                      |     |
| TcCLB.508145.10  | RNA-binding protein                                  | RRM |
| TcCLB.508145.20  | RNA-binding protein                                  | RRM |
| TcCLB.510143.80  | RNA-binding protein                                  | RRM |
| TcCLB.508409.270 |                                                      |     |
| TcCLB.510755.120 | RNA-binding protein                                  | RRM |
| TcCLB.508413.50  |                                                      |     |
| TcCLB.508461.320 | U5 snRNA-associated splicing factor                  | RRM |
| TcCLB.510877.150 | Eukaryotic translation initiation factor 3 subunit g | RRM |
| TcCLB.508689.20  |                                                      |     |
| TcCLB.508837.140 | u1 small nuclear ribonucleoprotein 70 kDa            | RRM |
| TcCLB.511383.30  |                                                      |     |
| TcCLB.511277.200 | RNA-binding protein                                  | RRM |
| TcCLB.511367.60  | Lupus La protein homolog                             | RRM |
| TcCLB.511127.10  | RNA-binding protein 5                                | RRM |
| TcCLB.511481.70  |                                                      |     |

|                  |                                               |     |
|------------------|-----------------------------------------------|-----|
| TcCLB.508879.80  | Hypothetical protein                          | RRM |
| TcCLB.424195.9   | RNA-binding protein 4                         | RRM |
| TcCLB.508901.20  |                                               |     |
| TcCLB.508989.30  | RNA-binding protein                           | RRM |
| TcCLB.509569.120 |                                               |     |
| TcCLB.509965.180 | RNA-binding protein                           | RRM |
| TcCLB.509053.179 |                                               |     |
| TcCLB.509055.10  | RNA-binding protein                           | RRM |
| TcCLB.511621.50  | RNA-binding protein                           | RRM |
| TcCLB.509317.60  |                                               |     |
| TcCLB.510507.50  | RNA-binding protein                           | RRM |
| TcCLB.509461.100 |                                               |     |
| TcCLB.510105.33  | RNA-binding protein                           | RRM |
| TcCLB.509715.23  |                                               |     |
| TcCLB.511741.40  | RNA-binding protein                           | RRM |
| TcCLB.511517.70  |                                               |     |
| TcCLB.511727.160 | Polypyrimidine tract-binding protein          | RRM |
| TcCLB.511727.190 | Hypothetical protein                          | RRM |
| TcCLB.511727.270 | RNA-binding protein                           | RRM |
| TcCLB.511727.290 | RNA-binding protein                           | RRM |
| TcCLB.511871.110 | Hypothetical protein                          | RRM |
| TcCLB.511863.20  |                                               |     |
| TcCLB.511837.138 | RNA-binding protein                           | RRM |
| TcCLB.510311.50  | Hypothetical protein                          | RRM |
| TcCLB.510265.40  |                                               |     |
| TcCLB.510747.80  | Double RNA binding domain protein 9           | RRM |
| TcCLB.510657.160 |                                               |     |
| TcCLB.506435.120 | ATP-dependent RNA helicase *                  | RRM |
| TcCLB.506265.100 |                                               |     |
| TcCLB.511003.30  | Mitochondrial RNA binding complex 1 subunit * | RRM |
| TcCLB.503715.10  | Splicing factor TSR1, putative *              | RRM |
| TcCLB.509607.30  |                                               |     |

|                                     |                                               |             |
|-------------------------------------|-----------------------------------------------|-------------|
| TcCLB.511181.70<br>TcCLB.508299.89  | Hypothetical protein, conserved *             | RRM         |
| TcCLB.510741.40<br>TcCLB.510661.230 | Hypothetical protein, conserved *             | RRM         |
| TcCLB.509167.140<br>TcCLB.485683.10 | RNA-binding protein 42 *                      | RRM         |
| TcCLB.506885.70<br>TcCLB.508461.140 | Polyadenylate-binding protein 1               | RRM/PABP    |
| TcCLB.503989.10<br>TcCLB.401469.10  | Zinc finger protein 2                         | Zinc Finger |
| TcCLB.411427.10                     | Hypothetical protein                          | Zinc Finger |
| TcCLB.506859.204<br>TcCLB.503567.9  | Hypothetical protein                          | Zinc Finger |
| TcCLB.503577.20<br>TcCLB.510943.60  | U2 splicing auxiliary factor                  | Zinc Finger |
| TcCLB.503795.10<br>TcCLB.506679.10  | Hypothetical protein                          | Zinc Finger |
| TcCLB.503897.150<br>TcCLB.509561.39 | Hypothetical protein                          | Zinc Finger |
| TcCLB.507089.30<br>TcCLB.504085.70  | Zinc finger protein                           | Zinc Finger |
| TcCLB.511577.30<br>TcCLB.504797.110 | Hypothetical protein                          | Zinc Finger |
| TcCLB.504929.5<br>TcCLB.507305.40   | Zinc finger CCCH domain containing protein 11 | Zinc Finger |
| TcCLB.510295.59                     | Hypothetical protein                          | Zinc Finger |
| TcCLB.510297.10<br>TcCLB.506009.10  | Hypothetical protein                          | Zinc Finger |
| TcCLB.506127.20                     | mRNA export factor MEX67                      | Zinc Finger |
| TcCLB.506211.60<br>TcCLB.508895.60  | RNA-binding protein                           | Zinc Finger |
| TcCLB.506211.70                     | RNA-binding protein                           | Zinc Finger |



|                  |                                                     |             |
|------------------|-----------------------------------------------------|-------------|
| TcCLB.508895.50  | RNA binding protein                                 | Zinc Finger |
| TcCLB.510101.200 | Zinc finger ccch and cchc domain-containing protein | Zinc Finger |
| TcCLB.506297.130 |                                                     |             |
| TcCLB.506733.140 | Hypothetical protein                                | Zinc Finger |
| TcCLB.509229.90  |                                                     |             |
| TcCLB.506739.99  | Zinc finger (CCCH type) protein                     | Zinc Finger |
| TcCLB.510819.119 |                                                     |             |
| TcCLB.510759.100 | Hypothetical protein                                | Zinc Finger |
| TcCLB.506999.120 |                                                     |             |
| TcCLB.509551.60  | Hypothetical protein                                | Zinc Finger |
| TcCLB.507007.77  |                                                     |             |
| TcCLB.508271.4   | Hypothetical protein                                | Zinc Finger |
| TcCLB.506859.80  | Hypothetical protein                                | Zinc Finger |
| TcCLB.511815.50  |                                                     |             |
| TcCLB.506859.230 | Hypothetical protein                                | Zinc Finger |
| TcCLB.511817.10  |                                                     |             |
| TcCLB.506859.240 | Hypothetical protein                                | Zinc Finger |
| TcCLB.511817.20  |                                                     |             |
| TcCLB.510427.10  | Hypothetical protein                                | Zinc Finger |
| TcCLB.506883.120 |                                                     |             |
| TcCLB.506885.200 | Hypothetical protein                                | Zinc Finger |
| TcCLB.510729.220 |                                                     |             |
| TcCLB.506885.204 | Hypothetical protein                                | Zinc Finger |
| TcCLB.510729.210 |                                                     |             |
| TcCLB.506931.4   | Hypothetical protein                                | Zinc Finger |
| TcCLB.510131.44  |                                                     |             |
| TcCLB.506933.50  | Hypothetical protein                                | Zinc Finger |
| TcCLB.506945.210 | Zinc finger CCCH domain-containing protein 47       | Zinc Finger |
| TcCLB.503453.20  | Hypothetical protein                                | Zinc Finger |
| TcCLB.506977.110 | Hypothetical protein                                | Zinc Finger |
| TcCLB.510351.80  | Hypothetical protein                                | Zinc Finger |
| TcCLB.507601.80  |                                                     |             |

|                                      |                      |             |
|--------------------------------------|----------------------|-------------|
| TcCLB.507625.70<br>TcCLB.507787.140  | Hypothetical protein | Zinc Finger |
| TcCLB.511867.10<br>TcCLB.507775.10   | Hypothetical protein | Zinc Finger |
| TcCLB.507831.20<br>TcCLB.511263.50   | Hypothetical protein | Zinc Finger |
| TcCLB.507831.30<br>TcCLB.511263.40   | Hypothetical protein | Zinc Finger |
| TcCLB.507831.40<br>TcCLB.511263.30   | Hypothetical protein | Zinc Finger |
| TcCLB.508215.10<br>TcCLB.508879.10   | Hypothetical protein | Zinc Finger |
| TcCLB.508241.90<br>TcCLB.511151.20   | Hypothetical protein | Zinc Finger |
| TcCLB.508357.9<br>TcCLB.508355.330   | Hypothetical protein | Zinc Finger |
| TcCLB.510143.120<br>TcCLB.508409.310 | Hypothetical protein | Zinc Finger |
| TcCLB.508693.40                      | Hypothetical protein | Zinc Finger |
| TcCLB.508831.66<br>TcCLB.511671.130  | Hypothetical protein | Zinc Finger |
| TcCLB.509805.240<br>TcCLB.511267.20  | Hypothetical protein | Zinc Finger |
| TcCLB.509805.230<br>TcCLB.511267.24  | Hypothetical protein | Zinc Finger |
| TcCLB.511467.4                       | Hypothetical protein | Zinc Finger |
| TcCLB.509231.39<br>TcCLB.509719.69   | Hypothetical protein | Zinc Finger |
| TcCLB.509233.210                     | Hypothetical protein | Zinc Finger |
| TcCLB.463297.10<br>TcCLB.509395.40   | Hypothetical protein | Zinc Finger |
| TcCLB.511039.39                      | Hypothetical protein | Zinc Finger |

|                  |                                                                |             |
|------------------|----------------------------------------------------------------|-------------|
| TcCLB.509791.90  | Hypothetical protein                                           | Zinc Finger |
| TcCLB.511555.40  | cleavage and polyadenylation specificity factor 30 kDa subunit | Zinc Finger |
| TcCLB.510219.30  |                                                                |             |
| TcCLB.511511.3   | Zinc finger protein ZFP1                                       | Zinc Finger |
| TcCLB.511511.6   | Zinc finger protein ZFP1                                       | Zinc Finger |
| TcCLB.511735.40  | Hypothetical protein                                           | Zinc Finger |
| TcCLB.511521.20  |                                                                |             |
| TcCLB.511735.88  | Hypothetical protein                                           | Zinc Finger |
| TcCLB.511807.130 | Hypothetical protein                                           | Zinc Finger |
| TcCLB.511807.160 | Hypothetical protein                                           | Zinc Finger |
| TcCLB.511867.60  | Hypothetical protein                                           | Zinc Finger |
| TcCLB.507611.398 | RNA editing complex protein MP63, putative *                   | Zinc Finger |
| TcCLB.506247.30  |                                                                |             |
| TcCLB.506357.69  | Hypothetical protein, conserved *                              | Zinc Finger |
| TcCLB.511277.39  |                                                                |             |
| TcCLB.506533.70  | hypothetical protein, conserved *                              | Zinc Finger |
| TcCLB.509395.10  |                                                                |             |
| TcCLB.510149.70  | Zinc-finger double-stranded RNA-binding, putative *            | Zinc Finger |
| TcCLB.506989.20  |                                                                |             |
| TcCLB.509443.20  | Mitochondrial RNA binding protein 1, putative *                | Zinc Finger |
| TcCLB.507017.140 |                                                                |             |
| TcCLB.510857.40  | RNA-editing complex protein, putative *                        | Zinc Finger |
| TcCLB.509611.110 |                                                                |             |
| TcCLB.510743.20  | Hypothetical protein, conserved *                              | Zinc Finger |
| TcCLB.510659.279 | Nucleic acid binding protein, putative *                       |             |
| TcCLB.510687.20  | Zinc knuckle, putative *                                       | Zinc Finger |
| TcCLB.397937.10  | Pumilio/PUF RNA binding protein 1                              | PUF         |
| TcCLB.508625.160 |                                                                |             |
| TcCLB.508787.30  | Pumilio/PUF RNA binding protein 3                              | PUF         |
| TcCLB.468005.9   |                                                                |             |
| TcCLB.503757.30  | Hypothetical protein                                           | PUF         |
| TcCLB.503719.39  |                                                                |             |

|                                      |                                                                        |      |
|--------------------------------------|------------------------------------------------------------------------|------|
| TcCLB.506563.10<br>TcCLB.503869.40   | Pumilio/PUF RNA binding protein 9                                      | PUF  |
| TcCLB.506773.130<br>TcCLB.508799.70  | Pumilio-repeat, RNA-binding protein                                    | PUF  |
| TcCLB.508479.120<br>TcCLB.507049.199 | Pumilio/PUF RNA binding protein 8<br>Pumilio protein                   | PUF  |
| TcCLB.508577.100<br>TcCLB.507521.110 | Pumilio/PUF RNA binding protein 5                                      | PUF  |
| TcCLB.507831.110<br>TcCLB.511261.120 | Pumilio/PUF RNA binding protein 2                                      | PUF  |
| TcCLB.511715.100<br>TcCLB.508445.99  | Pumilio/PUF RNA binding protein 7                                      | PUF  |
| TcCLB.510073.30<br>TcCLB.509399.190  | Pumilio/PUF RNA binding protein 4                                      | PUF  |
| TcCLB.509759.19<br>TcCLB.510125.10   | Pumilio/PUF RNA binding protein 1<br>Pumilio/PUF RNA binding protein 6 | PUF  |
| TcCLB.510121.110                     | Hypothetical protein, conserved *                                      | PUF  |
| TcCLB.506605.100<br>TcCLB.511239.90  | Hypothetical protein *                                                 | KH   |
| TcCLB.506625.200                     | Ribosomal RNA processing protein 40, putative *                        | KH   |
| TcCLB.510595.20<br>TcCLB.507895.150  | KH domain, putative *                                                  | KH   |
| TcCLB.510167.29<br>TcCLB.508859.109  | Ribosomal RNA processing protein 4, putative *                         | KH   |
| TcCLB.508717.40<br>TcCLB.504079.10   | Branch point binding protein, putative *                               | KH   |
| TcCLB.506943.120<br>TcCLB.509065.130 | Hypothetical protein, conserved *                                      | KH   |
| TcCLB.507011.50<br>TcCLB.507005.70   | Pre-rRNA-processing protein PNO1, putative *                           | KH   |
| TcCLB.504089.60<br>TcCLB.504001.10   | Hypothetical protein                                                   | Alba |

|                  |                                                         |      |
|------------------|---------------------------------------------------------|------|
| TcCLB.504089.70  | Hypothetical protein                                    | Alba |
| TcCLB.504001.20  |                                                         |      |
| TcCLB.510877.30  | Hypothetical protein                                    | Alba |
| TcCLB.510877.40  | Hypothetical protein                                    | Alba |
| TcCLB.508489.20  | SAM domain (Sterile alpha motif), putative *            | SAM  |
| TcCLB.511495.20  |                                                         |      |
| TcCLB.511517.140 | Hypothetical protein *                                  | SAM  |
| TcCLB.506743.4   | Eukaryotic translation initiation factor 1A, putative * | S1   |
| TcCLB.503945.10  |                                                         |      |
| TcCLB.511367.240 | PIWI-like protein *                                     | PIWI |

**Supplementary Table 5. Differentially expressed (DE) RBP genes in CL Brener epimastigotes compared to tissue culture derived trypomastigotes and amastigotes**

up\_rbp\_epi\_tryp

| Gene_ID          | log2FoldChange | padj       | Product.Description                                             | baseMean    |
|------------------|----------------|------------|-----------------------------------------------------------------|-------------|
| TcCLB.506739.99  | 3,375343804    |            | 0 zinc finger (CCCH type) protein, putative                     | 2185,865298 |
| TcCLB.511367.240 | 3,094115105    | 1,76E-216  | PIWI-like protein                                               | 662,1385698 |
| TcCLB.506931.4   | 3,083180798    | 1,44E-209  | hypothetical protein, conserved                                 | 617,9904423 |
| TcCLB.510131.44  | 2,256998567    | 1,17E-103  | hypothetical protein, conserved                                 | 397,3848663 |
| TcCLB.506885.204 | 1,98029734     | 1,02E-85   | hypothetical protein, conserved                                 | 1315,025274 |
| TcCLB.510819.119 | 1,862887088    | 1,11E-62   | zinc finger (CCCH type) protein, putative                       | 441,074966  |
| TcCLB.511817.20  | 1,661164991    | 4,14E-49   | hypothetical protein, conserved                                 | 742,5119723 |
| TcCLB.511727.190 | 1,552708525    | 5,67E-55   | hypothetical protein, conserved                                 | 860,4491512 |
| TcCLB.510729.210 | 1,536519579    | 1,34E-49   | hypothetical protein, conserved                                 | 1238,25649  |
| TcCLB.503683.11  | 1,501644083    | 6,45E-12   | Double RNA binding domain protein 6A                            | 68,19733144 |
| TcCLB.509999.140 | 1,38211067     | 1,59E-10   | Double RNA binding domain protein 6A                            | 62,34236312 |
| TcCLB.509167.140 | 1,321968923    | 3,89E-26   | RNA-binding protein 42 (RNA-binding motif protein 42), putative | 2566,66086  |
| TcCLB.503715.10  | 1,300663146    | 9,67E-46   | splicing factor TSR1, putative                                  | 651,4772317 |
| TcCLB.507831.20  | 1,286588075    | 0,00336573 | hypothetical protein, conserved                                 | 12,04852544 |
| TcCLB.504001.10  | 1,163342264    | 1,68E-39   | hypothetical protein, conserved                                 | 731,256651  |
| TcCLB.507521.110 | 1,145254164    | 1,79E-24   | pumilio/PUF RNA binding protein 5, putative                     | 590,9808113 |
| TcCLB.508981.20  | 1,145006263    | 1,48E-13   | hypothetical protein, conserved                                 | 131,5808328 |
| TcCLB.504089.60  | 1,135679874    | 2,10E-29   | hypothetical protein, conserved                                 | 640,3714296 |
| TcCLB.510759.100 | 1,130248597    | 8,25E-30   | NLI interacting factor-like phosphatase, putative               | 662,9663541 |
| TcCLB.507093.220 | 1,130099204    | 3,85E-27   | RNA-binding protein UBP1, putative                              | 683,4398677 |
| TcCLB.509551.60  | 1,113536142    | 1,01E-11   | hypothetical protein, conserved                                 | 149,8472427 |
| TcCLB.397937.10  | 1,09134651     | 2,14E-17   | pumilio/PUF RNA binding protein 1, putative                     | 280,5579971 |
| TcCLB.511239.90  | 1,040458085    | 1,00E-17   | hypothetical protein                                            | 423,8807767 |
| TcCLB.506925.400 | 1,02489769     | 9,29E-26   | hypothetical protein, conserved                                 | 469,9322563 |
| TcCLB.506859.240 | 1,023027367    | 0,00015803 | hypothetical protein, conserved                                 | 44,00844484 |
| TcCLB.511727.270 | 1,02004571     | 1,24E-40   | RNA-binding protein, putative                                   | 4671,643903 |
| TcCLB.504001.20  | 1,017585967    | 1,31E-20   | hypothetical protein, conserved                                 | 548,2993083 |
| TcCLB.511109.130 | 1,015023714    | 2,91E-19   | heterogeneous nuclear ribonucleoprotein H/F, putative           | 440,8719704 |
| TcCLB.507873.30  | 1,002368453    | 7,12E-25   | Double RNA binding domain protein 7                             | 555,3921937 |

up\_rbp\_epi\_ama

| Gene_ID          | log2FoldChange | padj       | Product.Description                                   | baseMean    |
|------------------|----------------|------------|-------------------------------------------------------|-------------|
| TcCLB.511367.240 | 3,606306398    | 1,08E-122  | PIWI-like protein                                     | 662,1385698 |
| TcCLB.506931.4   | 2,968390566    | 1,33E-105  | hypothetical protein, conserved                       | 617,9904423 |
| TcCLB.503683.11  | 2,940718444    | 4,86E-13   | Double RNA binding domain protein 6A                  | 68,19733144 |
| TcCLB.507831.20  | 2,920879201    | 0,00309465 | hypothetical protein, conserved                       | 12,04852544 |
| TcCLB.506739.99  | 2,903661541    | 2,08E-223  | zinc finger (CCCH type) protein, putative             | 2185,865298 |
| TcCLB.509999.140 | 2,736095578    | 7,98E-12   | Double RNA binding domain protein 6A                  | 62,34236312 |
| TcCLB.510131.44  | 2,667522511    | 1,89E-66   | hypothetical protein, conserved                       | 397,3848663 |
| TcCLB.511817.20  | 2,318963286    | 3,51E-69   | hypothetical protein, conserved                       | 742,5119723 |
| TcCLB.511807.130 | 2,24141306     | 5,70E-08   | hypothetical protein, conserved                       | 52,31017629 |
| TcCLB.506825.10  | 1,899025256    | 0,00718    | Double RNA binding domain protein 12                  | 17,10971309 |
| TcCLB.511109.130 | 1,531304738    | 5,19E-29   | heterogeneous nuclear ribonucleoprotein H/F, putative | 440,8719704 |
| TcCLB.506859.240 | 1,394223886    | 0,00031145 | hypothetical protein, conserved                       | 44,00844484 |
| TcCLB.510819.119 | 1,373311199    | 1,01E-26   | zinc finger (CCCH type) protein, putative             | 441,074966  |
| TcCLB.511815.50  | 1,149067182    | 6,19E-32   | hypothetical protein, conserved                       | 798,3011834 |
| TcCLB.503683.30  | 1,115764285    | 3,95E-05   | RNA-binding protein, putative                         | 94,27632534 |
| TcCLB.504797.110 | 1,052741502    | 9,44E-21   | hypothetical protein, conserved                       | 528,7644126 |
| TcCLB.504157.10  | 1,0340873      | 7,50E-14   | heterogeneous nuclear ribonucleoprotein H/F, putative | 513,665032  |



down\_rbp\_epi\_tryp

| Gene_ID          | log2FoldChange | padj       | Product.Description                           | baseMean    |
|------------------|----------------|------------|-----------------------------------------------|-------------|
| TcCLB.504929.5   | -4,218970659   | 1,17E-13   | zinc finger CCCH domain containing protein 11 | 738,8239859 |
| TcCLB.511127.10  | -3,731845286   | 8,08E-14   | RNA-binding protein 5, putative               | 18,64229074 |
| TcCLB.507305.40  | -3,546565836   | 8,05E-09   | zinc finger CCCH domain containing protein 11 | 395,5125914 |
| TcCLB.511511.6   | -2,772415292   | 2,76E-18   | zinc finger protein ZFP1                      | 69,81133245 |
| TcCLB.503709.10  | -2,166808655   | 1,83E-10   | hypothetical protein                          | 30,10067699 |
| TcCLB.508145.30  | -1,582651619   | 1,03E-09   | RNA-binding protein, putative                 | 43,77587004 |
| TcCLB.506859.230 | -1,501176104   | 0,00222551 | hypothetical protein, conserved               | 20,91041858 |
| TcCLB.508153.680 | -1,464377286   | 8,19E-12   | RNA-binding protein 6, putative               | 64,02849288 |
| TcCLB.508409.310 | -1,247622136   | 2,54E-23   | hypothetical protein, conserved               | 335,900361  |
| TcCLB.503795.10  | -1,235074829   | 4,56E-05   | hypothetical protein, conserved               | 28,78739941 |
| TcCLB.511867.10  | -1,231511545   | 7,10E-32   | hypothetical protein, conserved               | 494,1776714 |
| TcCLB.506693.30  | -1,222264095   | 0,00049099 | RNA-binding protein 6, putative               | 23,05838598 |
| TcCLB.463297.10  | -1,209880482   | 7,27E-07   | hypothetical protein (fragment)               | 52,56989367 |
| TcCLB.509395.40  | -1,101937442   | 2,52E-14   | hypothetical protein, conserved               | 617,1306421 |
| TcCLB.503989.10  | -1,080798934   | 2,74E-25   | zinc finger protein 2, putative               | 514,1393144 |
| TcCLB.504005.6   | -1,070280763   | 4,31E-11   | RNA-binding protein, putative                 | 229,6842293 |
| TcCLB.411427.10  | -1,057410862   | 1,67E-06   | hypothetical protein, conserved               | 78,4964516  |
| TcCLB.401469.10  | -1,02771079    | 1,84E-22   | zinc finger protein 2, putative               | 464,84793   |

down\_rbp\_epi\_ama

| Gene_ID          | log2FoldChange | padj       | Product.Description                                                                    |
|------------------|----------------|------------|----------------------------------------------------------------------------------------|
| TcCLB.507025.50  | -2,563453339   | 1,27E-45   | RNA-binding protein, putative                                                          |
| TcCLB.469785.40  | -2,501442805   | 1,32E-63   | RNA-binding protein, putative                                                          |
| TcCLB.507305.40  | -1,915652352   | 0,00116426 | zinc finger CCCH domain containing protein 11                                          |
| TcCLB.504005.6   | -1,914949264   | 1,83E-32   | RNA-binding protein, putative                                                          |
| TcCLB.507025.60  | -1,715049643   | 1,24E-08   | RNA-binding protein, putative                                                          |
| TcCLB.506859.230 | -1,633861682   | 0,00251421 | hypothetical protein, conserved                                                        |
| TcCLB.511481.55  | -1,3748801     | 6,41E-17   | RNA-binding protein, putative                                                          |
| TcCLB.503709.10  | -1,316430723   | 0,00257097 | hypothetical protein                                                                   |
| TcCLB.504929.5   | -1,209683928   | 0,03393288 | zinc finger CCCH domain containing protein 11                                          |
| TcCLB.503733.50  | -1,138418607   | 1,81E-14   | hypothetical protein, conserved (pseudogene)                                           |
| TcCLB.504089.70  | -1,082636199   | 1,08E-16   | hypothetical protein, conserved                                                        |
| TcCLB.508145.30  | -1,041068597   | 0,00211606 | RNA-binding protein, putative                                                          |
| TcCLB.510743.20  | -1,01179592    | 1,13E-10   | hypothetical protein, conserved                                                        |
| TcCLB.507895.150 | -1,008790555   | 4,92E-11   | KH domain/Domain of unknown function (DUF1771)/Smr domain containing protein, putative |

**Supplementary Table 6. Complete list of DE genes in TcZC3H12 KO cell lines compared to wild type parasites.**

up\_ko\_vs\_wt

| gid_1            | deseq_logfc_ | deseq_adj_p_3 | annotcdslength | strand_5 | annotgeneproduct_6                                                       |
|------------------|--------------|---------------|----------------|----------|--------------------------------------------------------------------------|
| TcCLB.507485.45  | 1,849        | 0,003069      | 540.0          | -        | Amastin surface glycoprotein, putative                                   |
| TcCLB.508821.60  | 1,644        | 0,004139      | 288.0          | -        | hypothetical protein, conserved                                          |
| TcCLB.511635.69  | 1,566        | 0,0004775     | 291.0          | -        | hypothetical protein, conserved                                          |
| TcCLB.506469.110 | 1,524        | 0,01097       | 807.0          | +        | hypothetical protein                                                     |
| TcCLB.407477.44  | 1,496        | 0,02174       | 366.0          | +        | hypothetical protein, conserved                                          |
| TcCLB.509367.15  | 1,481        | 0,00006752    | 798.0          | -        | tryptophanyl-tRNA synthetase (pseudogene), putative                      |
| TcCLB.510131.40  | 1,445        | 8,728E-13     | 936.0          | +        | haloacid dehalogenase-like hydrolase, putative                           |
| TcCLB.510691.70  | 1,442        | 0,00003615    | 663.0          | -        | hypothetical protein, conserved                                          |
| TcCLB.504625.74  | 1,381        | 0,0000393     | 291.0          | -        | hypothetical protein, conserved                                          |
| TcCLB.506893.80  | 1,365        | 0,0002498     | 564.0          | +        | monothiol glutaredoxin, putative                                         |
| TcCLB.511413.11  | 1,335        | 0,02164       | 3207.0         | +        | hypothetical protein, conserved (pseudogene)                             |
| TcCLB.507851.40  | 1,318        | 2,219E-08     | 618.0          | +        | hypothetical protein, conserved                                          |
| TcCLB.506627.100 | 1,299        | 0,0001155     | 537.0          | +        | hypothetical protein, conserved                                          |
| TcCLB.507297.30  | 1,276        | 0,01201       | 1077.0         | -        | metacaspase, putative                                                    |
| TcCLB.508537.10  | 1,265        | 0,001118      | 741.0          | -        | glyceraldehyde 3-phosphate dehydrogenase, cytosolic, putative            |
| TcCLB.506871.50  | 1,218        | 0,005482      | 1317.0         | -        | ubiquitin hydrolase, putative                                            |
| TcCLB.511037.20  | 1,188        | 6,704E-20     | 1563.0         | +        | L-2-hydroxyglutarate dehydrogenase, mitochondrial, putative              |
| TcCLB.506857.40  | 1,162        | 0,02095       | 1164.0         | -        | hypothetical protein, conserved                                          |
| TcCLB.506867.10  | 1,157        | 0,009843      | 1368.0         | -        | endonuclease G, putative                                                 |
| TcCLB.510609.65  | 1,134        | 0,04723       | 300.0          | +        | u6 snrna-associated sm-like protein lsm3                                 |
| TcCLB.503617.15  | 1,133        | 0,04943       | 492.0          | +        | u6 snrna-associated sm-like protein lsm3                                 |
| TcCLB.511751.166 | 1,124        | 0,00804       | 990.0          | +        | Putative papain-like cysteine peptidase (DUF1796), putative              |
| TcCLB.508727.30  | 1,119        | 0,000621      | 990.0          | +        | TIGR00269 family protein, putative                                       |
| TcCLB.509769.66  | 1,107        | 0,00001501    | 399.0          | +        | hypothetical protein, conserved                                          |
| TcCLB.503809.75  | 1,102        | 0,008929      | 396.0          | -        | hypothetical protein, conserved                                          |
| TcCLB.503639.30  | 1,101        | 0,001456      | 2274.0         | +        | hypothetical protein, conserved                                          |
| TcCLB.507639.100 | 1,092        | 0,008613      | 1011.0         | -        | phosphatidylinositol N-acetylglucosaminyltransferase subunit C, putative |
| TcCLB.510181.150 | 1,09         | 0,0000324     | 567.0          | +        | caltractin, putative                                                     |
| TcCLB.510105.150 | 1,077        | 0,0001436     | 798.0          | -        | methyltransferase domain containing protein, putative                    |
| TcCLB.511733.60  | 1,066        | 0,01953       | 1059.0         | -        | hypothetical protein, conserved                                          |
| TcCLB.507517.30  | 1,062        | 0,02322       | 981.0          | +        | hypothetical protein, conserved                                          |
| TcCLB.506649.64  | 1,058        | 0,01542       | 480.0          | -        | hypothetical protein, conserved                                          |

|                  |       |           |        |   |                                                                      |
|------------------|-------|-----------|--------|---|----------------------------------------------------------------------|
| TcCLB.506247.300 | 1,057 | 1,859E-11 | 471.0  | + | hypothetical protein, conserved                                      |
| TcCLB.508539.20  | 1,056 | 0,01577   | 501.0  | + | MICOS complex subunit MIC17, putative                                |
| TcCLB.510357.120 | 1,053 | 0,04723   | 648.0  | - | hypothetical protein, conserved                                      |
| TcCLB.506369.30  | 1,052 | 0,02532   | 1287.0 | - | JmjC domain, hydroxylase, putative                                   |
| TcCLB.511165.50  | 1,047 | 0,00983   | 486.0  | - | PA domain containing protein, putative                               |
| TcCLB.504171.40  | 1,046 | 7,404E-09 | 498.0  | + | Mechanosensitive ion channel MscS, putative                          |
| TcCLB.506251.20  | 1,044 | 0,000621  | 1044.0 | + | hypothetical protein, conserved                                      |
| TcCLB.509179.120 | 1,043 | 0,01542   | 384.0  | - | hypothetical protein, conserved                                      |
| TcCLB.511705.20  | 1,04  | 0,008227  | 840.0  | + | putative prolyl carboxypeptidase, putative                           |
| TcCLB.508479.5   | 1,037 | 0,03761   | 960.0  | + | glycine dehydrogenase (pseudogene), putative                         |
| TcCLB.510357.60  | 1,037 | 0,03692   | 390.0  | - | hypothetical protein, conserved                                      |
| TcCLB.504103.6   | 1,035 | 0,00201   | 591.0  | + | non-canonical purine NTP pyrophosphatase, RdgB/HAM1 family, putative |
| TcCLB.506247.420 | 1,035 | 0,004554  | 948.0  | + | hypothetical protein, conserved                                      |
| TcCLB.510409.60  | 1,033 | 0,04584   | 1479.0 | + | hypothetical protein, conserved                                      |
| TcCLB.508355.20  | 1,027 | 0,02971   | 486.0  | + | hypothetical protein, conserved                                      |
| TcCLB.506247.355 | 1,025 | 0,01293   | 738.0  | + | hypothetical protein, conserved                                      |
| TcCLB.506925.420 | 1,022 | 0,0005952 | 624.0  | + | hypothetical protein, conserved                                      |
| TcCLB.503811.45  | 1,018 | 0,02128   | 456.0  | - | hypothetical protein, conserved                                      |
| TcCLB.509065.36  | 1,016 | 0,03211   | 414.0  | - | hypothetical protein, conserved                                      |
| TcCLB.508409.190 | 1,013 | 0,03462   | 825.0  | - | FHA domain containing protein, putative                              |
| TcCLB.509167.170 | 1,01  | 0,01127   | 981.0  | - | tRNA (Guanine-1)-methyltransferase, putative                         |
| TcCLB.507795.40  | 1,003 | 0,03763   | 306.0  | - | hypothetical protein, conserved                                      |

down\_ko\_vs\_wt

| gid_1            | deseq_logfc_2 | deseq_adj_p_3 | annotcdslength_4 | strand_5 | annotgeneproduct_6                                                                 |
|------------------|---------------|---------------|------------------|----------|------------------------------------------------------------------------------------|
| TcCLB.506153.20  | -2,13         | 0,0001284     | 1137.0           | -        | amino acid transporter, putative                                                   |
| TcCLB.506053.10  | -1,883        | 1,855E-10     | 1347.0           | -        | amino acid transporter, putative                                                   |
| TcCLB.503733.80  | -1,864        | 4,775E-20     | 6555.0           | -        | hypothetical protein, conserved                                                    |
| TcCLB.504173.40  | -1,849        | 0,000001952   | 852.0            | +        | hypothetical protein                                                               |
| TcCLB.506153.10  | -1,787        | 3,209E-08     | 1347.0           | -        | amino acid transporter, putative                                                   |
| TcCLB.506825.40  | -1,663        | 0,001118      | 1548.0           | +        | hypothetical protein, conserved                                                    |
| TcCLB.504173.60  | -1,509        | 1,737E-08     | 2664.0           | +        | RING-variant domain containing protein, putative                                   |
| TcCLB.507659.30  | -1,352        | 0,02282       | 1032.0           | +        | amino acid transporter, putative (fragment)                                        |
| TcCLB.507659.10  | -1,27         | 0,00007976    | 843.0            | +        | hypothetical protein, conserved                                                    |
| TcCLB.504165.10  | -1,199        | 0,004981      | 1014.0           | +        | hypothetical protein, conserved                                                    |
| TcCLB.511185.150 | -1,196        | 0,02546       | 6741.0           | +        | hypothetical protein, conserved (pseudogene)                                       |
| TcCLB.509645.30  | -1,192        | 0,02397       | 1074.0           | +        | hypothetical protein, conserved                                                    |
| TcCLB.509701.10  | -1,166        | 0,001913      | 2064.0           | +        | trifunctional enzyme alpha subunit, mitochondrial precursor-like protein, putative |
| TcCLB.506551.10  | -1,142        | 3,03E-12      | 1854.0           | -        | protein associated with differentiation 8, putative                                |
| TcCLB.408573.9   | -1,103        | 0,0376        | 1587.0           | +        | hypothetical protein, conserved (fragment)                                         |
| TcCLB.510519.40  | -1,096        | 0,008874      | 1581.0           | -        | protein kinase PK4, putative                                                       |
| TcCLB.506863.40  | -1,092        | 0,01341       | 945.0            | +        | hypothetical protein, conserved                                                    |
| TcCLB.506717.219 | -1,089        | 0,03981       | 1956.0           | +        | GMP synthase (pseudogene), putative                                                |
| TcCLB.508799.270 | -1,049        | 4,461E-08     | 1797.0           | -        | protein associated with differentiation 8, putative                                |
| TcCLB.506401.330 | -1,038        | 0,01513       | 987.0            | -        | hypothetical protein, conserved                                                    |

| <b>genotype_7</b> | <b>chromosome_8</b> | <b>start_9</b> | <b>end_10</b> |
|-------------------|---------------------|----------------|---------------|
| protein coding    | TcChr12-P           | 453869         | 455005        |
| protein coding    | TcChr12-P           | 456634         | 457980        |
| protein coding    | TcChr19-P           | 257683         | 264237        |
| protein coding    | TcChr31-P           | 428037         | 428888        |
| protein coding    | TcChr12-P           | 451352         | 452698        |
| protein coding    | TcChr27-S           | 674103         | 675650        |
| protein coding    | TcChr31-P           | 432562         | 435225        |
| protein coding    | TcChr31-P           | 443612         | 444643        |
| protein coding    | TcChr31-P           | 438860         | 439702        |
| protein coding    | TcChr29-S           | 99563          | 100576        |
| protein coding    | Tcruzi_8618         | 37483          | 44223         |
| protein coding    | TcChr37-S           | 1009684        | 1010757       |
| protein coding    | TcChr29-S           | 101482         | 103545        |
| protein coding    | TcChr27-S           | 202017         | 203870        |
| protein coding    | TcChr24-S           | 309217         | 310804        |
| protein coding    | TcChr10-P           | 431538         | 433118        |
| protein coding    | TcChr13-S           | 434392         | 435336        |
| protein coding    | TcChr2-S            | 146096         | 148053        |
| protein coding    | TcChr27-P           | 214056         | 215852        |
| protein coding    | TcChr19-S           | 380382         | 381368        |

**Supplementary Table 7. Primer sequences**

| <b>Primer</b>             | <b>Sequence</b>                                                                               |
|---------------------------|-----------------------------------------------------------------------------------------------|
| For_TcZC3H12_Xbal         | 5'tctagaATGCCCAAGGCCAACAAAG'3                                                                 |
| Rev_TcZC3H12::HA_XhoI     | 5'ctcgagT <u>TAAGCGTAATCTGGTACGTCGTATGGGTATT</u> CG<br>TAATATGTAGAGAGAG'3                     |
| For_5'KO_TcZC3H12_HindIII | 5'aagcttGGAGAACTTAAGGCATTCAT3'                                                                |
| Rev_5'KO_TcZC3H12_SacI    | 5'gagctcCGTTCAGAGAACTCTCTG3'                                                                  |
| For_3'KO_TcZC3H12_XhoI    | 5'ctcgagGAGTTGTTGGGTTTGAGC3'                                                                  |
| Rev_3'KO_TcZC3H12_Xbal    | 5'tctagaCCTGTAGGAAAGCAAAGCCG3'                                                                |
| sgTcZC3H12                | 5'GGAGGCCGGAGAATTGTAATACGACTCACTATAGGACT<br>TCCGTGTTGGACTGAGTCGTTTTAGTACTCTGGAAACAG<br>AATC3' |
| sgSpCas9_REV              | 5'AAAAAAGCACCGACTCGGGCCACTT3'                                                                 |
| For_TcZC3H12              | 5'AACTCGCGTTACAAGGAGGG3'                                                                      |
| Rev_TcZC3H12              | 5'TCTCCCCCGTAAACCGACCT3'                                                                      |
| For_RPL9_qPCR             | 5'TGACAACTCGACCATCAACA3'                                                                      |
| Rev_RPL9_qPCR             | 5'GGCGAAGCGAATCTTAAAC3'                                                                       |
| For_TcZC3H12_qPCR         | 5'GGCGAAGCGAATCTTAAAC3'                                                                       |
| Rev_TcZC3H12_qPCR         | 5'GGCCTCACGCTCATCTAGTC3'                                                                      |
| For_PAD_qPCR              | 5'GGTGGAGACGGACGTCGA3'                                                                        |
| Rev_PAD_qPCR              | 5'TAGACAAAGCTGGCGTTG3'                                                                        |
| For_transporter_qPCR      | 5'CTGCTGGGCAGCTTCTGT3'                                                                        |
| Rev_transporter_qPCR      | 5'GACAACCGCAACCACACCAG3'                                                                      |
| For_Neo                   | 5'CGACCCTGCAGCCAATATGGGATCG3'                                                                 |
| Rev_Neo                   | 5'TCAGAAGAAGCTCGTCAAGAAGGCG3'                                                                 |
| For_Higro                 | 5'ATGAAAAAGCCTGAACTCACCGC3'                                                                   |
| For_CDS_PAD               | 5'ATGACCGGCGAACAATTTG3'                                                                       |
| Rev_CDS_PAD               | 5'TTACGGACGTGCCACCTT3'                                                                        |
| For_CDS_GAPDH             | 5'ATGCCCATCAAGGTCGGTATC3'                                                                     |
| Rev_CDS_GAPDH             | 5'CTACAACCTTGCCGAACGATC3'                                                                     |

\*Lowercase letters indicate enzymes restriction sites

\*Underlined letters represent HA epitope
